# Supplementary material for: Targeted mRNP-phagy licenses translational activation during cellular metamorphosis
Source: Research Square preprint supplement (doi:10.21203/rs.3.rs-6289188/v1), 2025-05-06
Supplement: Supplementary file 1 [file 08b07c338f90b6a8122e730e.docx]

**Extented Data**


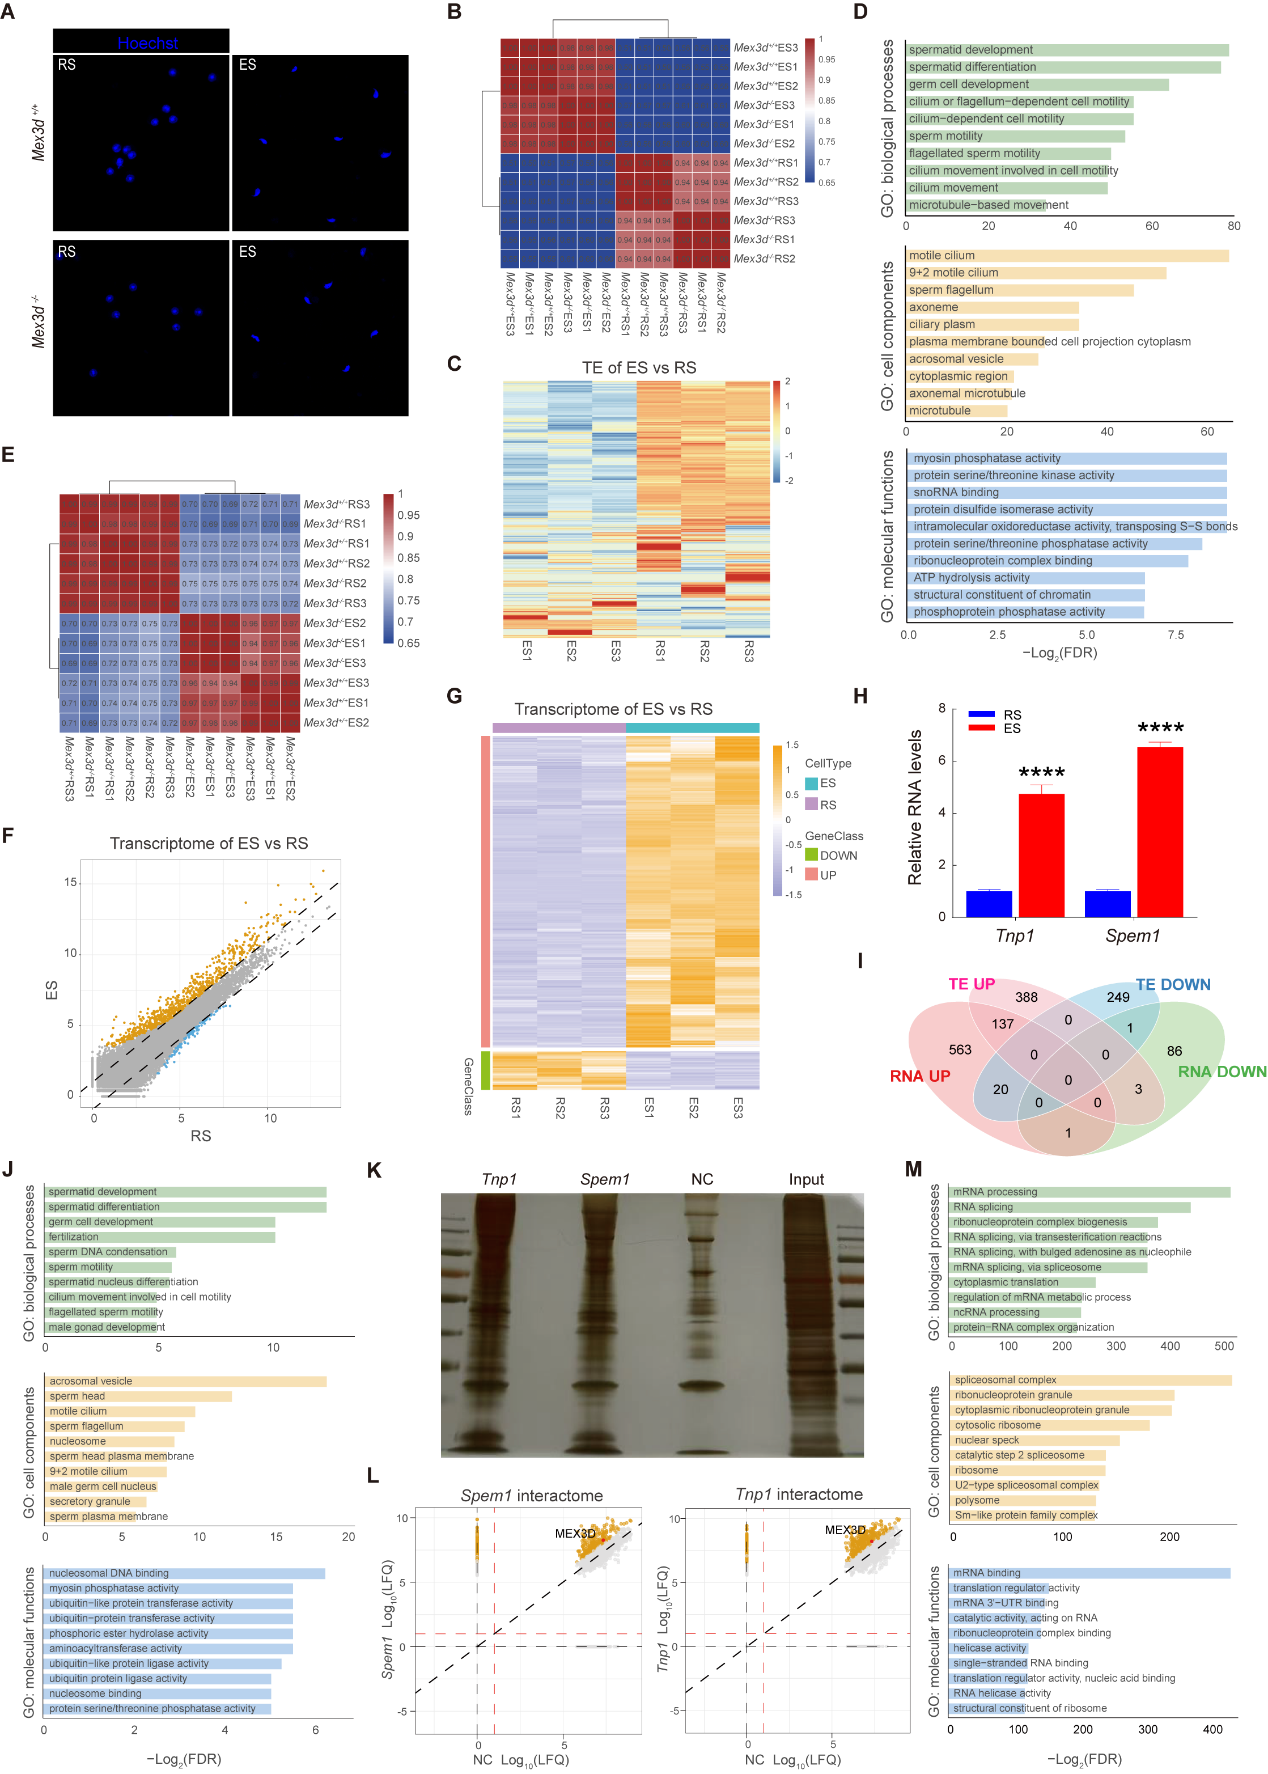


**Extended Data Fig. 1. Ribosome Footprints and mRNA-Binding Proteomes during Transcriptional Silencing, Related to Figure 1**

(A) Purity assessment of mouse spermatids sorted using the STA-PUT device. RS: round spermatids; ES: elongated spermatids.

(B) Polysome profiling of the mouse spermatids.

(C) RNAs with altered translation abundance during transcriptional silencing. Basemean ≥ 20, *Padj* < 0.05, |log2FC| > 1.

(D) Functional annotation of RNAs with increased TE during transcriptional silencing.

(E) Transcriptome profiling of the mouse spermatids.

(F) - (G) Scatter plot (F) and heatmap (G) showing mRNAs with altered transcription levels during transcriptional silencing. *Padj* < 0.05, |log2FC| > 1.

(H) Upregulation of *Tnp1* and *Spem1* transcription during transcriptional silencing. *n* = 3. *P* = 5.22E-05 (*Tnp1*), *P* = 1.54E-06 (*Spem1*)

(I) Venn diagram comparing mRNAs with changes in TE and transcription levels during transcriptional silencing.

(J) Functional annotation of RNAs with increased transcription levels during transcriptional silencing.

(K) - (L) Identification of *Spem1*- and *Tnp1*-associated protein groups.

(M) Enrichment of RBPs among *Spem1*- and *Tnp1*-associated proteins.


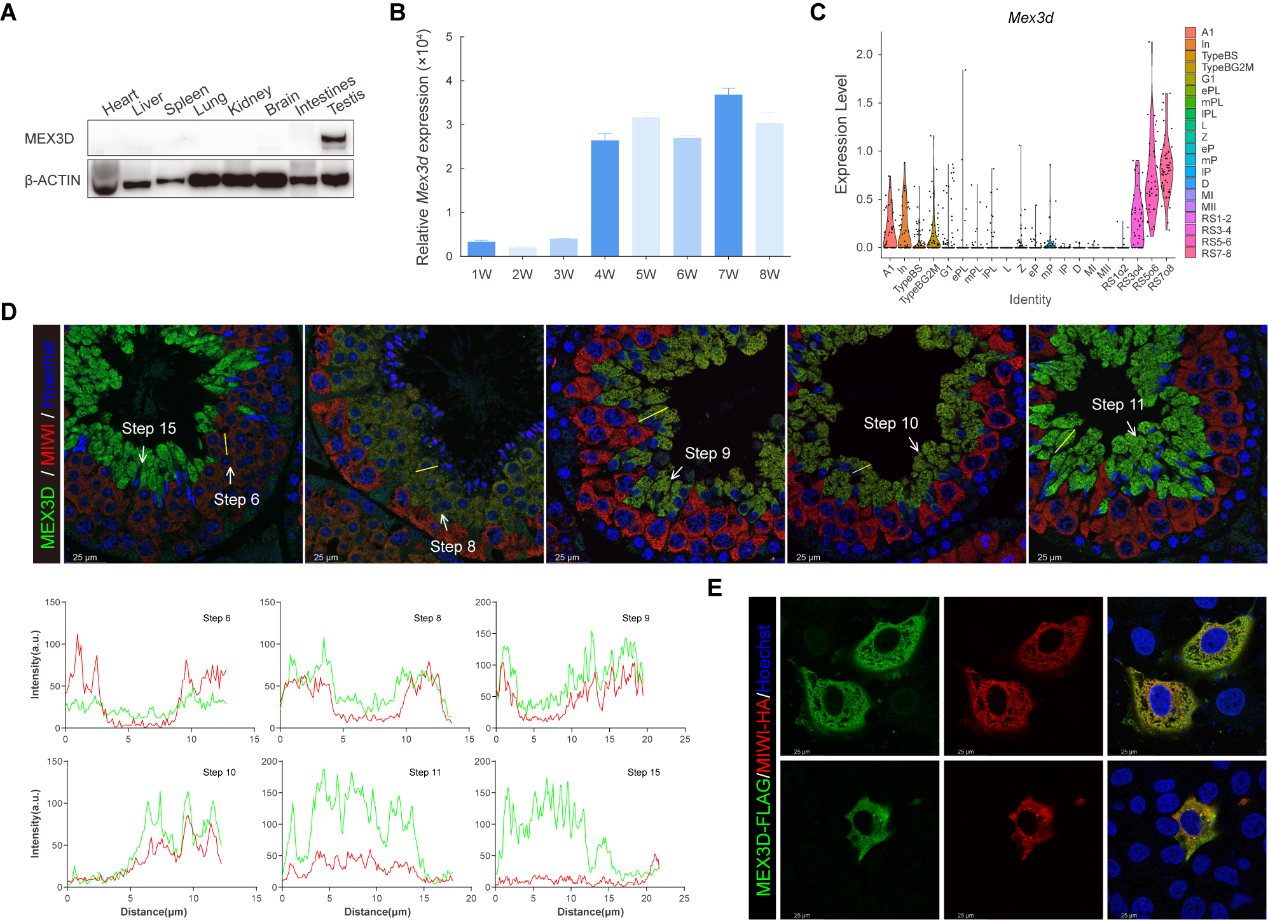


**Extended Data Fig. 2. Expression and localization patterns of MEX3D protein, Related to Figure 2**

(A) Expression levels of MEX3D protein across multiple mouse tissues.

(B) *Mex3d* mRNA expression in mouse testes at different developmental stages. *n* = 3.

(C) *Mex3d* expression in single-cell sequencing of mice testes.

(D) Immnufluoresence showing co-localization of MEX3D with the classical RBP MIWI. Bottom: co-localization analysis of MEX3D and MIWI across successive spermatogenic stages. Steps represent spermiogenic stages.

(E) Co-localization of overexpressed MEX3D and MIWI in 293T cells.


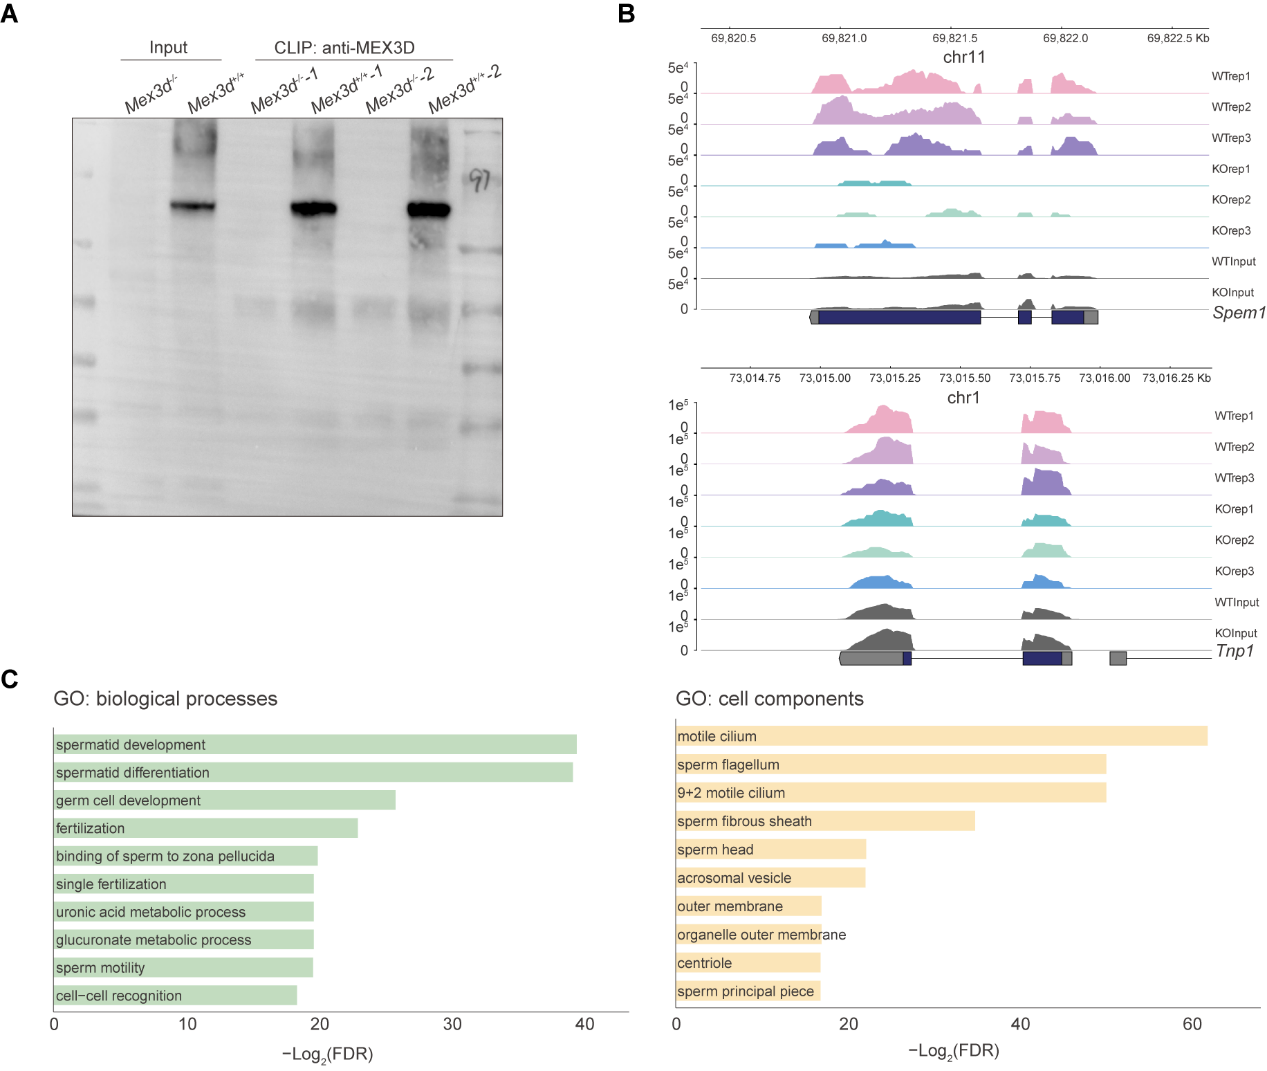


**Extended Data Fig. 3. Identification of MEX3D Substrate RNAs, Related to Figure 2**

(A) WB analysis of MEX3D immunoprecipitation during eCLIP-seq. *n* = 3.

(B) Read density tracks from MEX3D eCLIP showing binding sites on *Spem1* and *Tnp1* mRNAs, normalized to reads per million (RPM).

(C) MEX3D substrate mRNAs are critical for spermiogenesis and sperm function.


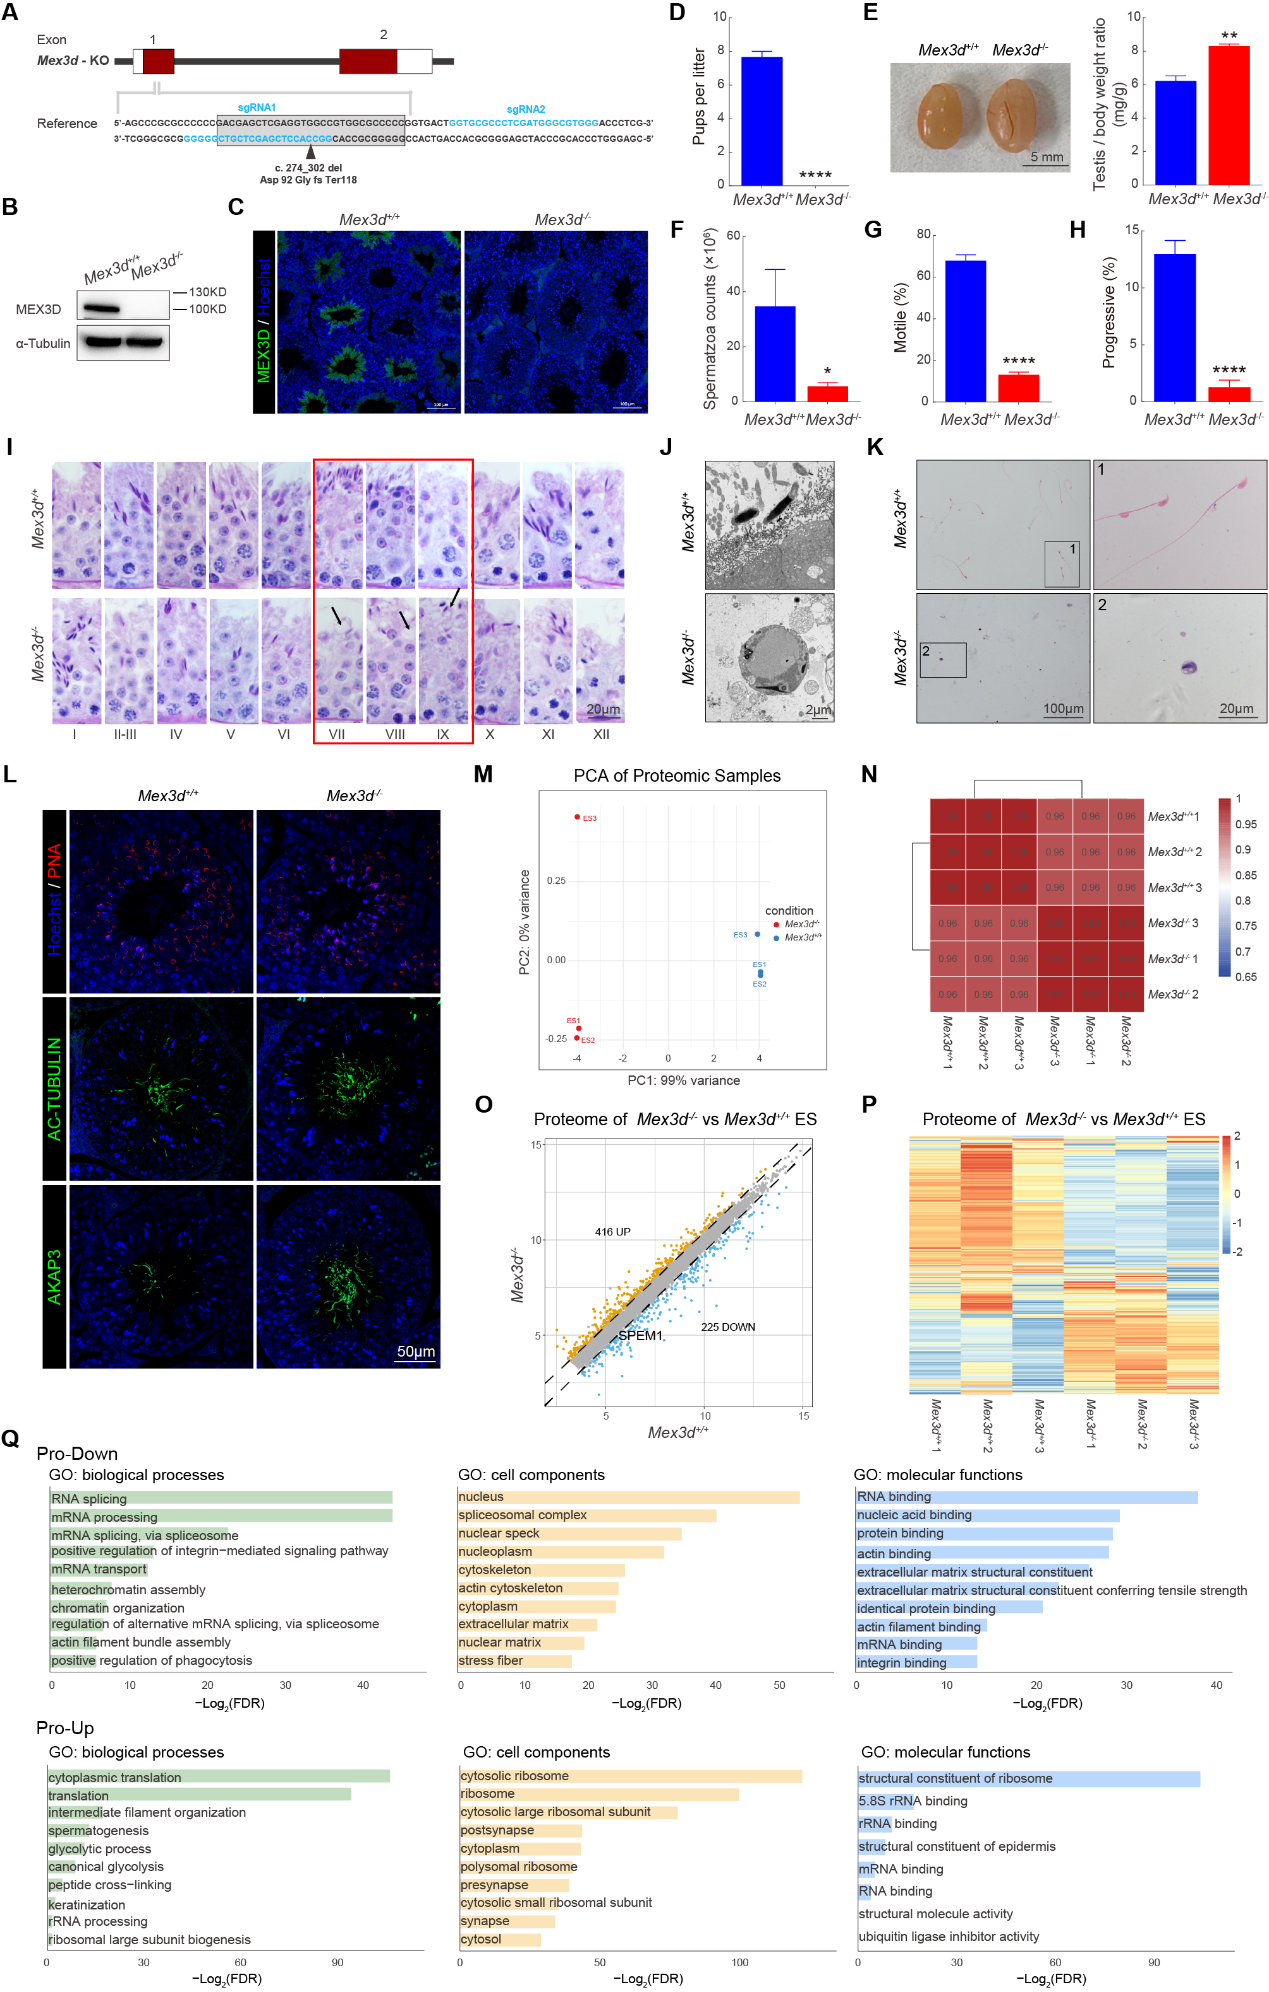


**Extended Data Fig. 4. Male Reproductive and Molecular Phenotypes of *Mex3d-/-* Mice, Related to Figure 3**

(A) Schematic of the CRISPR/Cas9 knockout strategy for *Mex3d*.

(B) - (C) WB (B) and Immunofluoresence (C) confirming complete MEX3D knockout in testes.

(D) Fertility test of *Mex3d-/-* mice. *n* = 3. *P* = 1.059E-05.

(E) Morphology of testes. Right, the bar chart shows testes-to-body weight ratio. *n* = 3. *P* = 0.0015.

(F) - (H) CASA analysis showing reduced sperm count (F), total motility (G), and progressive motility (H) in *Mex3d-/-* epididymal sperm. *n* = 3. *P* = 0.0495 (Count), *P* = 3.105E-05 (Motility), *P* = 0.0005 (Progressive motility).

(I) H&E staining showing seminiferous tubule morphology across stages in *Mex3d-/-* testes. Roman numerals indicate seminiferous tubule stages.

(J) - (K) TEM (J) and H&E staining (K) show cytoplasmic retention in sperm from the cauda epididymis of *Mex3d-/-* mice.

(L) Immunofluoresence staining of marker proteins for key events in seminiferous tubules. PNA marks acrosomes; AC-TUBULIN, flagellum; AKAP3, fibrous sheaths.

(M) - (N) Proteomic profiling of ES from *Mex3d+/+* and *Mex3d-/-* mice.

(O) - (P) Scatter plot (O) and heatmap (P) showing differentially expressed proteins in ES proteomes. Padj < 0.05, |log2FC| > 1.

(Q) Functional annotation of differentially expressed proteins. Up: upregulated in ES; Bottom: downregulated in ES.


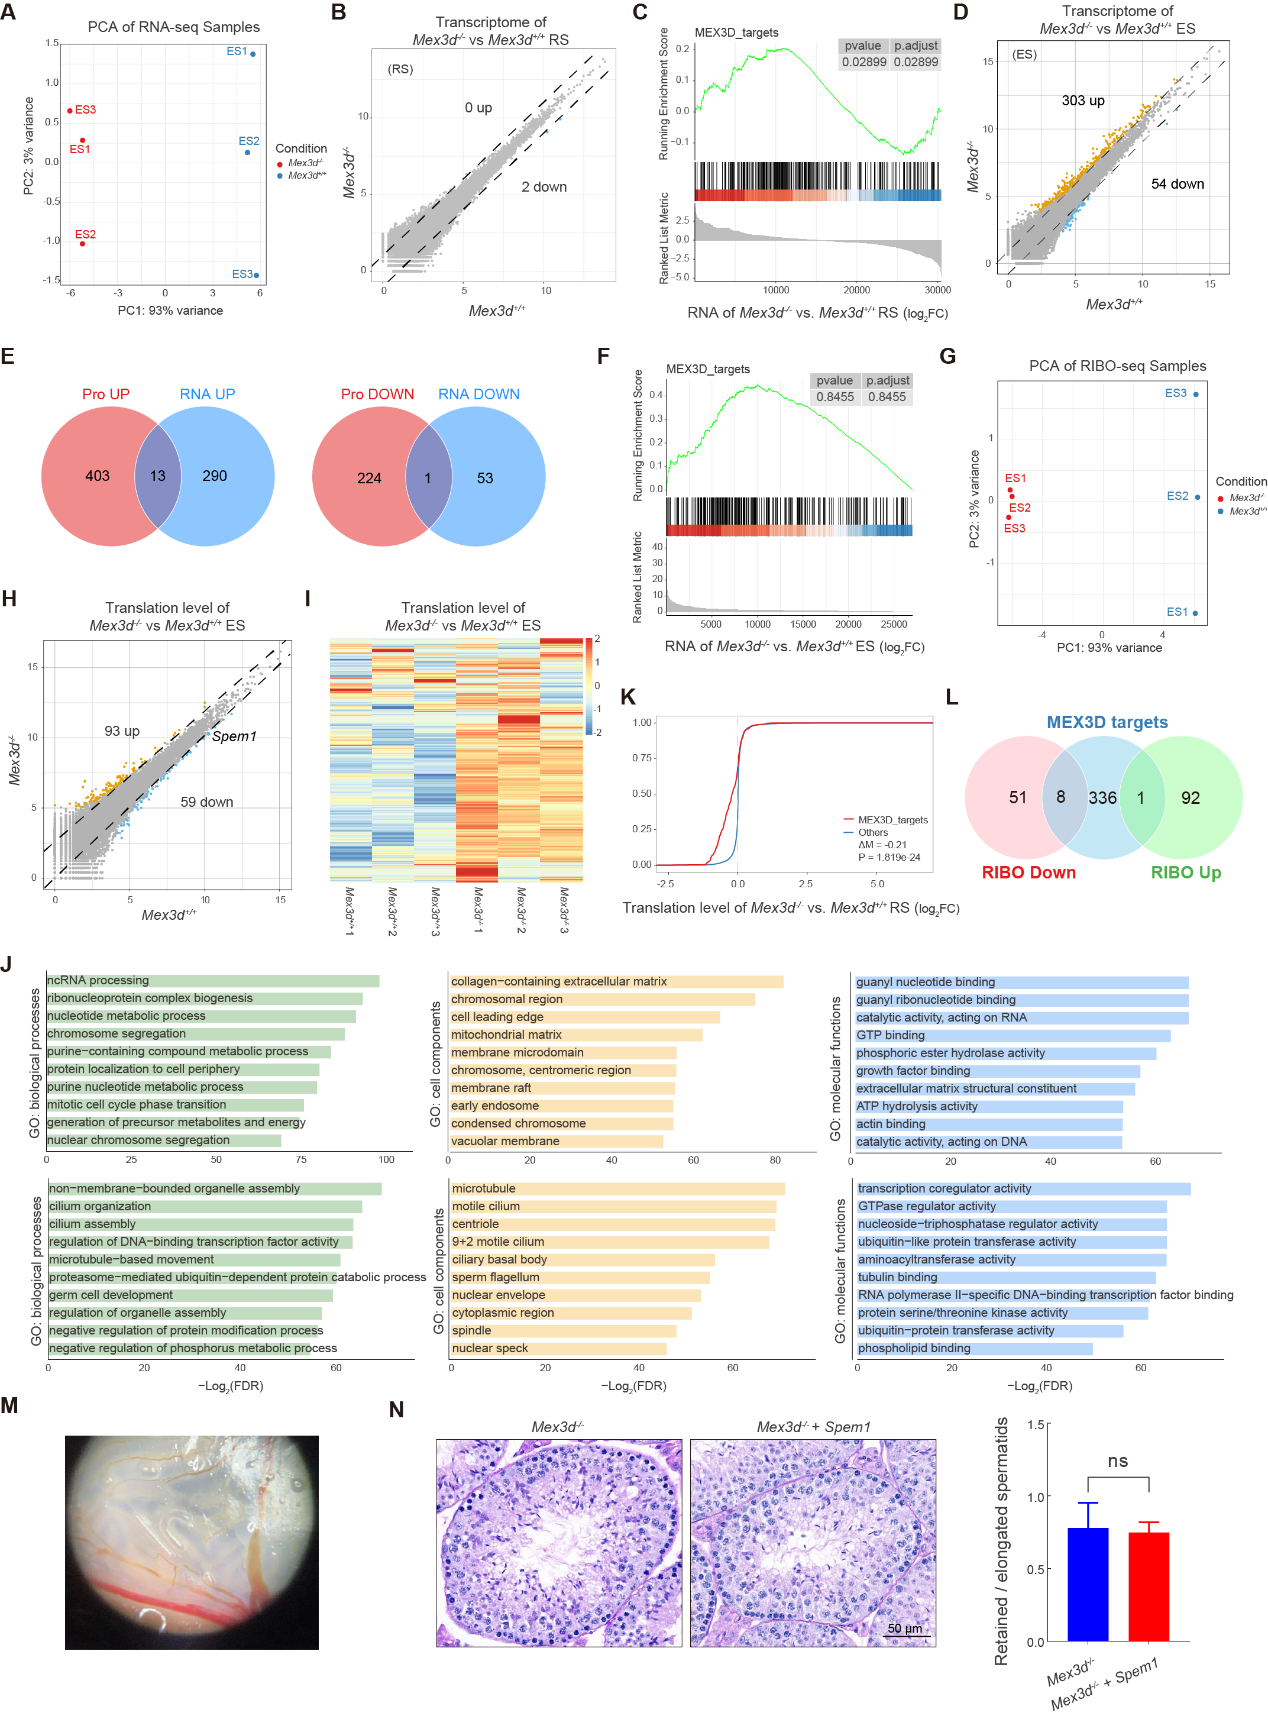


**Extended Data Fig. 5. MEX3D Knockout Suppresses Translation of Substrate mRNAs, Related to Figure 4**

(A) Transcriptome profiling of ES in *Mex3d-/-* and *Mex3d+/+* testes.

(B) Scatter plots showing differential transcriptome analysis in RS between *Mex3d-/-* and *Mex3d+/+*. Padj < 0.05, |log2FC| > 1.

(C) GSEA showing transcriptional changes of MEX3D substrate mRNAs in *Mex3d-/-* RS. *P* > 0.05.

(D) The differential transcriptome analysis in ES between *Mex3d-/-* and *Mex3d+/+*.

(E) Venn diagrams comparing differentially expressed proteins and mRNAs in *Mex3d-/-* and *Mex3d+/+* ES. Left, upregulated genes; Right, downregulated genes. Pro UP/DOWN, genes with increased or decreased protein levels in *Mex3d-/-* ES; RNA UP/DOWN, genes with increased or decreased mRNA levels in *Mex3d-/-* ES.

(F) GSEA showing transcriptional changes of MEX3D substrate mRNAs in *Mex3d-/-* ES. *P* > 0.05.

(G) Principal Component Analysis of polysome footprint in ES from *Mex3d-/-* and *Mex3d+/+* mice.

(H) - (I) Scatter plot (H) and heatmap (I) showing genes with differential translation levels in ES between *Mex3d-/-* and *Mex3d+/+* mice. Basebeam ≥ 20, Padj < 0.05, |log2FC| > 1.

(J) Functional annotation of genes with altered TE after MEX3D knockout. Top: increased TE; Bottom: decreased TE.

(K) - (L) Line plot (K) and Venn diagram (L) showing translation abundance of MEX3D substrate RNAs after MEX3D knockout. RIBO Up/Down, RNAs with increased/decreased translation levels in *Mex3d-/-* ES.

(M) Testis rete injection with lentiviral vector AAV-pCAG-*Spem1*-GFP.

(N) Sperm release in seminiferous tubules. Left: morphology of sperm release; Right: quantification of delayed sperm release. *n* = 3. *P* = 0.8797.


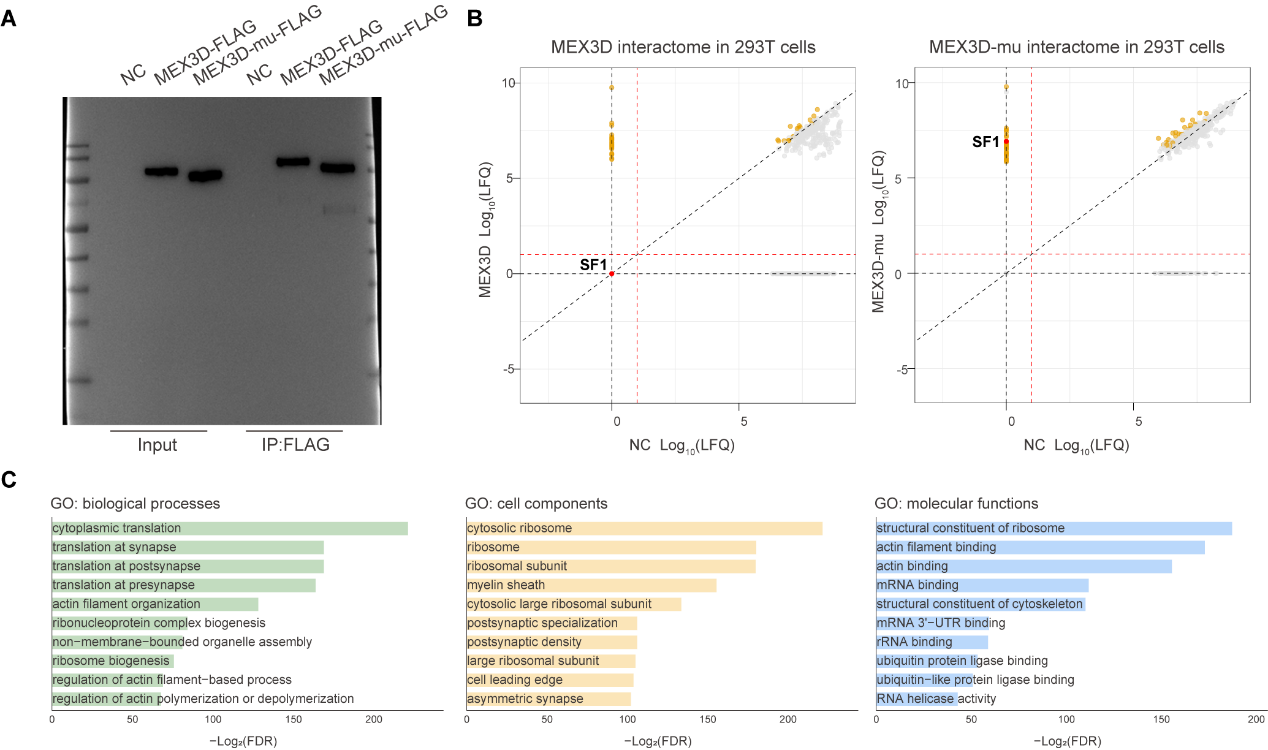


**Extended Data Fig. 6. MEX3D Binds to RBPs in 293T Cells, Related to Figure 5**

(A) WB analysis of MEX3D immunoprecipitation during IP - MS.

(B) Scatter plots showing LFQ values of proteins identified in MEX3D (left) and MEX3D-mu (right) immunoprecipitates.

(C) Functional annotation of proteins identified in the MEX3D-RING group.


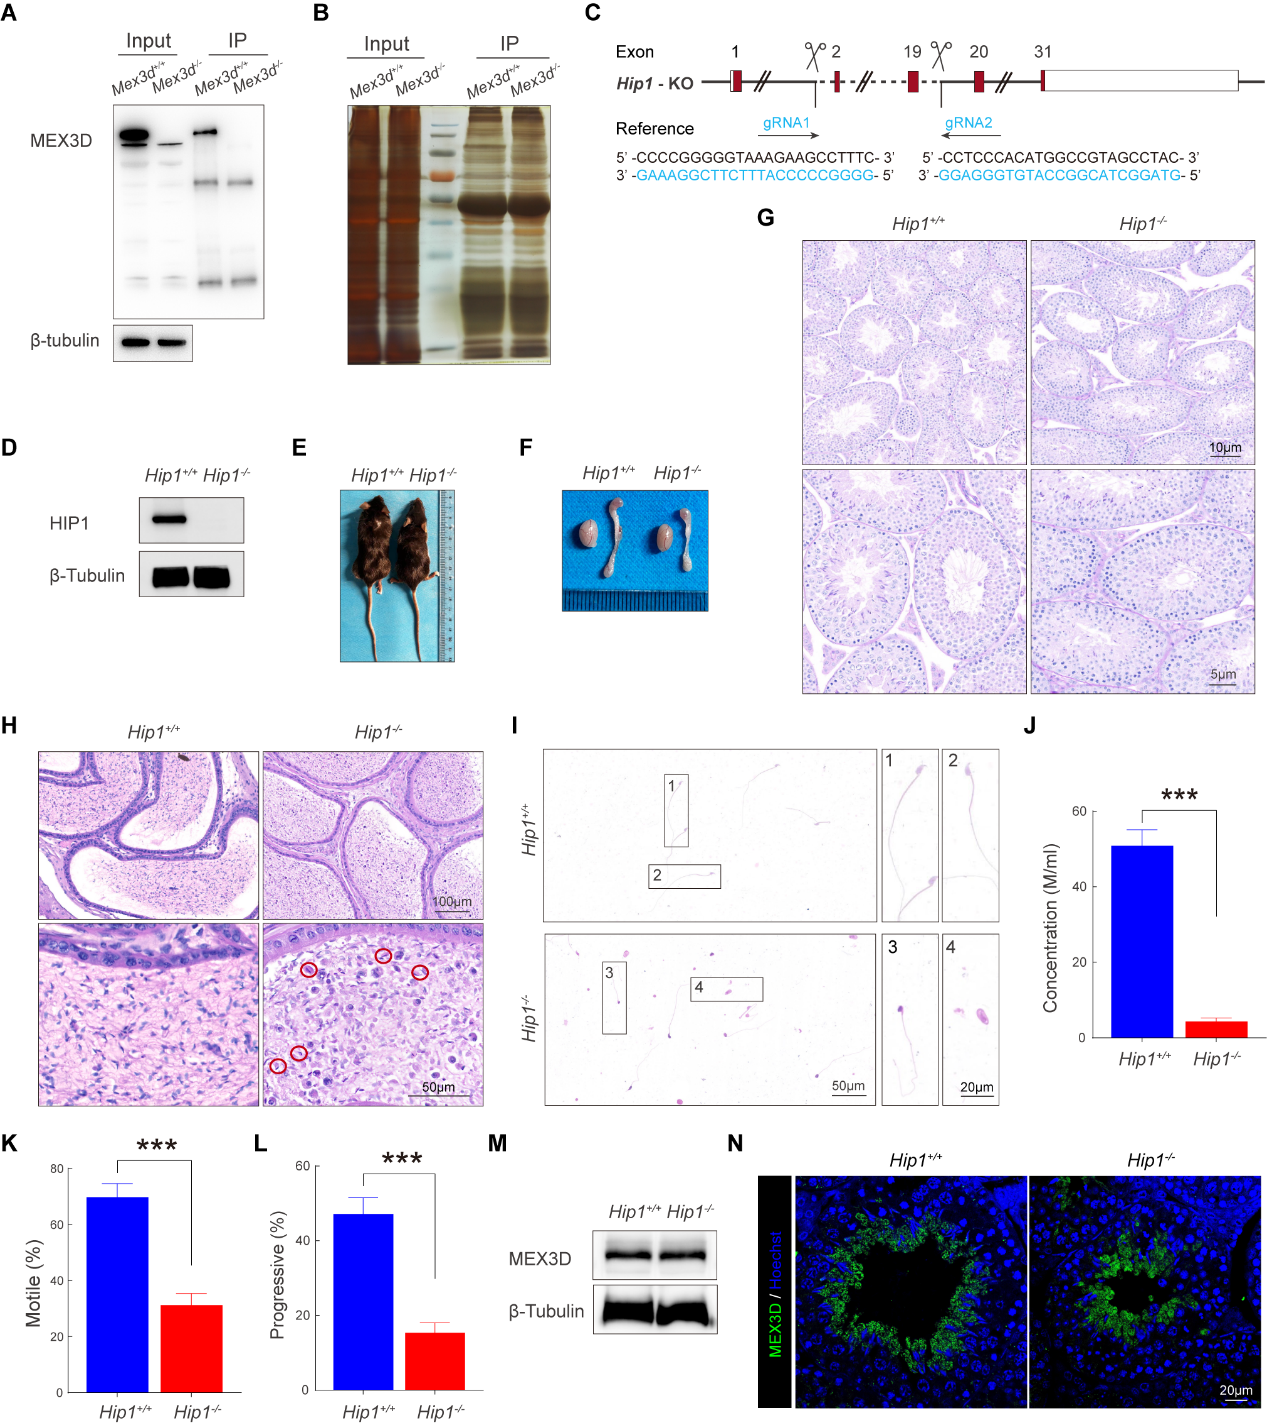


**Extended Data Fig. 7. HIP1 Deficiency Causes Morphological Defects during the Spermatogenic Transcriptional Silencing Phase, Related to Figure 6**

(A) - (B) WB (A) and silver staining (B) analysis of MEX3D immunoprecipitation in mice testes.

(C) Schematic of the CRISPR/Cas9 knockout strategy for *Hip1*.

(D) WB confirming complete HIP1 knockout in testes.

(E) - (F) Morphological comparison of *Hip1-/-* mice and *Hip1+/+* littermate controls, including testis and epididymis tissue.

(G) H&E staining of testes from the *Hip1-/-* and *Hip1+/+* mice.

(H) H&E staining of cauda epididymis, with red circles indicating sperm with cytoplasmic retention.

(I) Comparison of cauda epididymal sperm morphology between *Hip1-/-* and *Hip1+/+* mice.

(J) - (L) CASA analysis showing sperm count (J), total motility (K), and progressive motility (L) in cauda epididymis of *Hip1-/-* mice. *n* = 3. *P* = 0.0004 (Count), *P* = 0.0043 (Motility), *P* = 0.0020 (Progressive motility).

(M) - (N) WB (M) and imunofluoresence (N) showing unchanged expression and localization of MEX3D in *Hip1-/-* seminiferous tubules.


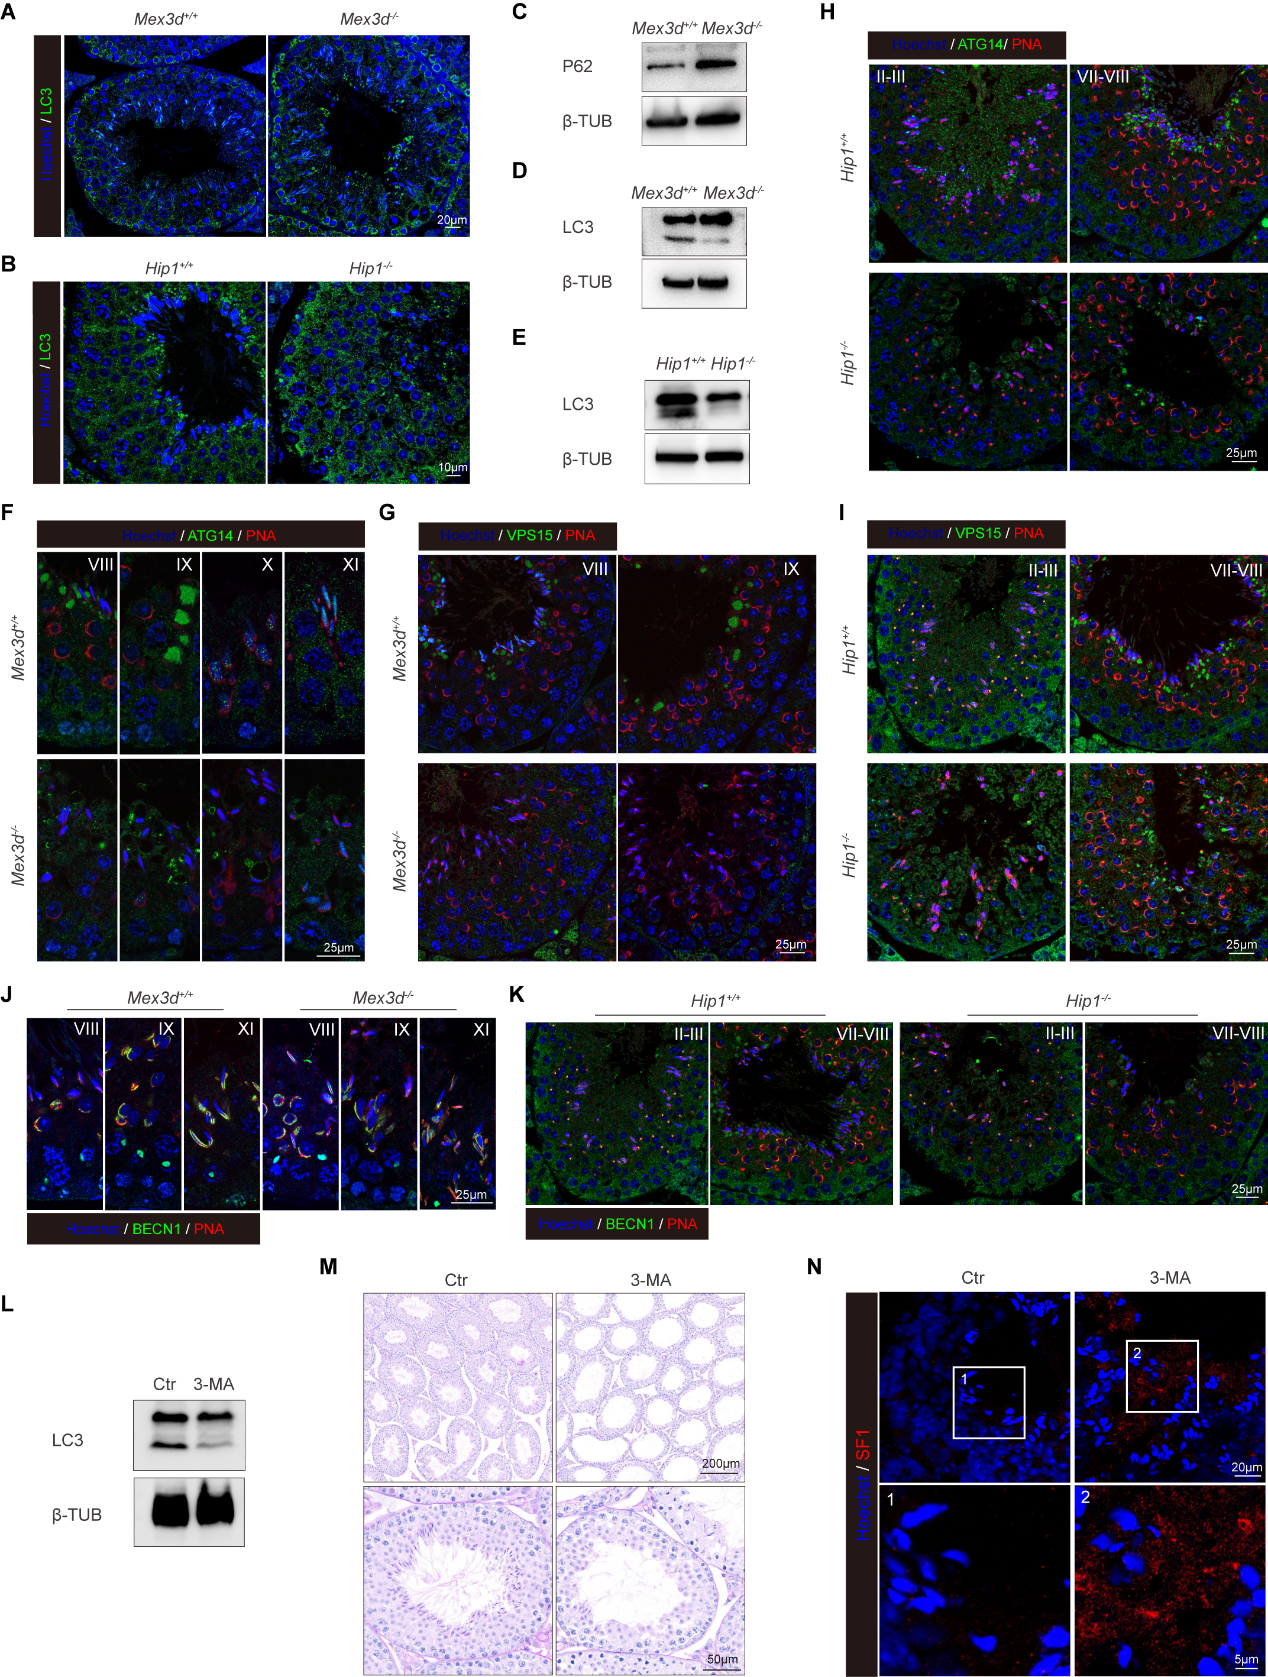


**Extended Data Fig. 8. Autophagic Flux during Spermatogenic Transcriptional Silencing and Its Regulation of RBPs**

(A) - (B) Imunofluoresence localization of LC3 showing autophagosome distribution in *Mex3d* (A) and *Hip1* (B) knockout testes.

(C) - (E) WB showing the expression of autophagic flux molecules in *Mex3d-/-* or *Hip-/-* testes.

(F) - (G) Localization of autophagic flux proteins ATG14 (F) and VPS15 (G) during sperm release and their loss in *Mex3d* knockout. Roman numerals indicate seminiferous tubule stages. Roman numerals indicate seminiferous tubule stages.

(H) - (I) Mislocalization of autophagic flux proteins during spermatogenic transcriptional silencing and sperm release in HIP1 knockout. Roman numerals indicate seminiferous tubule stages.

(J) - (K) IF localization of the autophagy regulator BECN1 associated with acrosome formation. BECN1 localization is not significantly affected by MEX3D (J) or HIP1 (K) knockout. Roman numerals indicate seminiferous tubule stages.

(L) WB analysis of LC3 levels in testis extracts from mice injected with 3-MA.

(M) H&E staining of seminiferous tubules in testes after 3-MA injection.

(N) IF showing the effects of autophagy inhibition on the localization of SF1 in ES.
