# Supplementary material for: Targeted mRNP-phagy licenses translational activation during cellular metamorphosis
Source: Research Square preprint supplement (doi:10.21203/rs.3.rs-6289188/v1), 2025-05-06
Supplement: Supplementary file 2 [file 4619cdd6814b3928f2c69002.xlsx]

## Sheet: HE-KE
ensembl_gene_id	baseMean	log2FoldChange	lfcSE	stat	pvalue	padj	HE1	HE2	HE3	KE1	KE2	KE3	external_gene_name	description
ENSMUSG00000031825	12.0573	-6.50718	1.35515	-4.80183	1.57E-06	3.19E-05	0	0	0	13.0196	33.6804	25.6438	Crispld2	cysteine-rich secretory protein LCCL domain containing 2 [Source:MGI Symbol;Acc:MGI:1926142]
ENSMUSG00000031170	11.349	-5.42576	1.39183	-3.89831	9.69E-05	0.00136573	0	1.38326	0	8.28519	18.861	39.5647	Slc38a5	solute carrier family 38, member 5 [Source:MGI Symbol;Acc:MGI:2148066]
ENSMUSG00000019124	10.0565	-4.33139	1.25045	-3.46387	0.000532457	0.005969	1.42715	1.38326	0	23.0802	24.9235	9.52482	Scrn1	secernin 1 [Source:MGI Symbol;Acc:MGI:1917188]
ENSMUSG00000029661	40.9756	-4.1676	0.588258	-7.08465	1.39E-12	6.09E-11	0	5.53303	7.54387	95.2797	61.2982	76.1986	Col1a2	collagen, type I, alpha 2 [Source:MGI Symbol;Acc:MGI:88468]
ENSMUSG00000002603	13.4498	-4.15299	1.02215	-4.06299	4.84E-05	0.000739894	2.85431	1.38326	0	23.672	33.0067	19.7823	Tgfb1	transforming growth factor, beta 1 [Source:MGI Symbol;Acc:MGI:98725]
ENSMUSG00000019997	31.5261	-3.94585	0.632929	-6.23427	4.54E-10	1.60E-08	8.56292	0	3.01755	56.8127	59.951	60.8123	Ccn2	cellular communication network factor 2 [Source:MGI Symbol;Acc:MGI:95537]
ENSMUSG00000001119	14.3856	-3.48278	0.895097	-3.89096	9.98E-05	0.00140015	0	6.91629	0	27.2228	31.6595	20.515	Col6a1	collagen, type VI, alpha 1 [Source:MGI Symbol;Acc:MGI:88459]
ENSMUSG00000028780	12.6074	-3.2549	0.949399	-3.42838	0.000607192	0.00666218	7.13577	0	0	24.2638	13.4721	30.7725	Sema3c	sema domain, immunoglobulin domain (Ig), short basic domain, secreted, (semaphorin) 3C [Source:MGI Symbol;Acc:MGI:107557]
ENSMUSG00000018217	14.1829	-3.12555	0.843249	-3.70656	0.000210097	0.00265822	2.85431	0	6.0351	20.713	18.861	36.6339	Pmp22	peripheral myelin protein 22 [Source:MGI Symbol;Acc:MGI:97631]
ENSMUSG00000027204	13.6624	-3.10378	0.842672	-3.68327	0.000230266	0.00288251	2.85431	5.53303	0	22.4884	18.861	32.2379	Fbn1	fibrillin 1 [Source:MGI Symbol;Acc:MGI:95489]
ENSMUSG00000034391	13.3197	-3.04167	0.87767	-3.46562	0.000529015	0.00593848	7.13577	0	1.50877	16.5704	19.5346	35.1686	Fbxo15	F-box protein 15 [Source:MGI Symbol;Acc:MGI:1354755]
ENSMUSG00000043207	11.0527	-3.00314	0.971114	-3.09247	0.00198497	0.0178066	0	0	7.54387	17.754	16.8402	24.1784	Zmpste24	zinc metallopeptidase, STE24 [Source:MGI Symbol;Acc:MGI:1890508]
ENSMUSG00000021361	10.2156	-2.9424	1.00625	-2.92412	0.00345426	0.0273363	0	6.91629	0	18.3458	23.5762	12.4555	Tmem14c	transmembrane protein 14C [Source:MGI Symbol;Acc:MGI:1913404]
ENSMUSG00000029231	19.8222	-2.85755	0.664218	-4.30212	1.69E-05	0.000285823	7.13577	2.76652	4.52632	31.9572	24.9235	47.6241	Pdgfra	platelet derived growth factor receptor, alpha polypeptide [Source:MGI Symbol;Acc:MGI:97530]
ENSMUSG00000029309	27.2624	-2.85164	0.577668	-4.93648	7.95E-07	1.70E-05	7.13577	12.4493	0	40.8341	51.8677	51.2875	Sparcl1	SPARC-like 1 [Source:MGI Symbol;Acc:MGI:108110]
ENSMUSG00000017754	20.5319	-2.78961	0.70391	-3.96302	7.40E-05	0.00108032	2.85431	12.4493	0	26.0392	52.5413	29.3071	Pltp	phospholipid transfer protein [Source:MGI Symbol;Acc:MGI:103151]
ENSMUSG00000030423	12.6861	-2.7337	0.958238	-2.85284	0.00433306	0.0328477	4.28146	5.53303	0	3.5508	36.3748	26.3764	Pop4	processing of precursor 4, ribonuclease P/MRP family, (S. cerevisiae) [Source:MGI Symbol;Acc:MGI:1913411]
ENSMUSG00000037035	23.4518	-2.72616	0.623262	-4.37402	1.22E-05	0.000212614	2.85431	13.8326	1.50877	31.9572	45.1317	45.4261	Inhbb	inhibin beta-B [Source:MGI Symbol;Acc:MGI:96571]
ENSMUSG00000026478	12.7245	-2.70974	0.805862	-3.36253	0.000772305	0.00819099	4.28146	1.38326	4.52632	23.672	16.8402	25.6438	Lamc1	laminin, gamma 1 [Source:MGI Symbol;Acc:MGI:99914]
ENSMUSG00000025816	30.5854	-2.68731	0.53989	-4.97751	6.44E-07	1.42E-05	12.8444	0	12.0702	57.4045	49.1733	52.0202	Sec61a2	SEC61 translocon subunit alpha 2 [Source:MGI Symbol;Acc:MGI:1931071]
ENSMUSG00000019278	15.704	-2.64081	0.741603	-3.56095	0.000369522	0.00434626	0	5.53303	7.54387	20.1212	30.9859	30.0398	Dpep1	dipeptidase 1 [Source:MGI Symbol;Acc:MGI:94917]
ENSMUSG00000029999	15.3027	-2.60316	0.742685	-3.50507	0.000456495	0.00523828	8.56292	1.38326	3.01755	18.9376	26.9443	32.9705	Tgfa	transforming growth factor alpha [Source:MGI Symbol;Acc:MGI:98724]
ENSMUSG00000005202	11.5245	-2.53823	0.857357	-2.96054	0.00307105	0.0248755	1.42715	2.76652	6.0351	12.4278	29.6387	16.8516	Shbg	sex hormone binding globulin [Source:MGI Symbol;Acc:MGI:98295]
ENSMUSG00000046179	12.8309	-2.50177	0.776069	-3.22365	0.00126568	0.0122591	1.42715	4.14978	6.0351	21.8966	22.229	21.2477	E2f8	E2F transcription factor 8 [Source:MGI Symbol;Acc:MGI:1922038]
ENSMUSG00000001506	23.4843	-2.48726	0.594859	-4.18125	2.90E-05	0.000465093	2.85431	15.2158	3.01755	37.8752	43.1109	38.832	Col1a1	collagen, type I, alpha 1 [Source:MGI Symbol;Acc:MGI:88467]
ENSMUSG00000035441	14.0492	-2.46442	0.772437	-3.19045	0.00142053	0.0135057	4.28146	4.14978	4.52632	34.9162	10.7777	25.6438	Myo1d	myosin ID [Source:MGI Symbol;Acc:MGI:107728]
ENSMUSG00000039031	14.0803	-2.45669	0.78133	-3.14424	0.00166521	0.0153893	2.85431	2.76652	7.54387	36.6916	22.9026	11.7229	Arhgap18	Rho GTPase activating protein 18 [Source:MGI Symbol;Acc:MGI:1921160]
ENSMUSG00000038633	15.3774	-2.43916	0.743654	-3.27996	0.00103821	0.0104862	0	8.29955	6.0351	26.0392	18.1874	33.7032	Degs1	delta 4-desaturase, sphingolipid 1 [Source:MGI Symbol;Acc:MGI:1097711]
ENSMUSG00000041329	15.4288	-2.42142	0.753068	-3.2154	0.00130261	0.0125433	0	4.14978	10.5614	20.1212	35.0276	22.713	Atp1b2	ATPase, Na+/K+ transporting, beta 2 polypeptide [Source:MGI Symbol;Acc:MGI:88109]
ENSMUSG00000032323	10.6047	-2.41595	0.90179	-2.67906	0.00738292	0.049632	0	5.53303	4.52632	22.4884	21.5554	9.52482	Cyp11a1	cytochrome P450, family 11, subfamily a, polypeptide 1 [Source:MGI Symbol;Acc:MGI:88582]
ENSMUSG00000025465	15.1179	-2.38501	0.730037	-3.26698	0.00108702	0.0108921	4.28146	1.38326	9.05265	17.1622	30.9859	27.8418	Echs1	enoyl Coenzyme A hydratase, short chain, 1, mitochondrial [Source:MGI Symbol;Acc:MGI:2136460]
ENSMUSG00000023224	114.734	-2.36104	0.27539	-8.57344	1.00E-17	6.75E-16	18.553	47.0308	46.772	220.741	192.652	162.655	Serping1	serine (or cysteine) peptidase inhibitor, clade G, member 1 [Source:MGI Symbol;Acc:MGI:894696]
ENSMUSG00000005533	13.0082	-2.3601	0.834024	-2.82977	0.00465819	0.0345165	0	11.0661	1.50877	26.0392	18.1874	21.2477	Igf1r	insulin-like growth factor I receptor [Source:MGI Symbol;Acc:MGI:96433]
ENSMUSG00000046785	20.4287	-2.34461	0.589266	-3.97886	6.92E-05	0.00102346	5.70861	6.91629	7.54387	33.1408	28.9651	40.2973	Epm2aip1	EPM2A interacting protein 1 [Source:MGI Symbol;Acc:MGI:1925031]
ENSMUSG00000040234	18.4613	-2.26895	0.697014	-3.25524	0.00113295	0.0112494	2.85431	1.38326	15.0877	36.6916	35.7012	19.0496	Tm7sf3	transmembrane 7 superfamily member 3 [Source:MGI Symbol;Acc:MGI:1914873]
ENSMUSG00000036617	21.12	-2.26418	0.654288	-3.46052	0.000539126	0.00603558	9.99007	0	12.0702	47.9357	21.5554	35.1686	Etl4	enhancer trap locus 4 [Source:MGI Symbol;Acc:MGI:95454]
ENSMUSG00000001942	16.5861	-2.24778	0.686732	-3.27315	0.00106355	0.0107029	2.85431	5.53303	9.05265	40.2423	24.2499	17.5843	Siae	sialic acid acetylesterase [Source:MGI Symbol;Acc:MGI:104803]
ENSMUSG00000020108	13.7023	-2.23939	0.830271	-2.69717	0.00699307	0.0476706	0	8.29955	6.0351	22.4884	8.75689	36.6339	Ddit4	DNA-damage-inducible transcript 4 [Source:MGI Symbol;Acc:MGI:1921997]
ENSMUSG00000017760	18.0379	-2.22255	0.732387	-3.03466	0.00240805	0.0205956	0	2.76652	16.5965	27.8146	39.0692	21.9804	Ctsa	cathepsin A [Source:MGI Symbol;Acc:MGI:97748]
ENSMUSG00000026840	44.6033	-2.21257	0.417155	-5.30395	1.13E-07	2.83E-06	4.28146	22.1321	21.1228	71.6077	78.1384	70.3372	Lamc3	laminin gamma 3 [Source:MGI Symbol;Acc:MGI:1344394]
ENSMUSG00000026879	98.5677	-2.20564	0.545088	-4.0464	5.20E-05	0.000788465	27.1159	15.2158	63.3685	185.233	149.541	150.932	Gsn	gelsolin [Source:MGI Symbol;Acc:MGI:95851]
ENSMUSG00000031785	40.1526	-2.2011	0.42757	-5.14793	2.63E-07	6.10E-06	14.2715	15.2158	13.579	75.7503	78.1384	43.9607	Adgrg1	adhesion G protein-coupled receptor G1 [Source:MGI Symbol;Acc:MGI:1340051]
ENSMUSG00000051503	15.6052	-2.17419	0.724157	-3.00238	0.00267879	0.0223557	5.70861	11.0661	0	27.2228	18.861	30.7725	Ccdc121rt3	coiled-coil domain containing 121, retrogene 3 [Source:MGI Symbol;Acc:MGI:3648511]
ENSMUSG00000046603	16.6014	-2.15315	0.795866	-2.70542	0.00682181	0.0466958	1.42715	16.5991	0	18.9376	20.8818	41.7627	Tcaim	T cell activation inhibitor, mitochondrial [Source:MGI Symbol;Acc:MGI:1196217]
ENSMUSG00000030619	13.9367	-2.11751	0.724139	-2.92418	0.00345361	0.0273363	7.13577	6.91629	1.50877	24.2638	26.9443	16.8516	Eed	embryonic ectoderm development [Source:MGI Symbol;Acc:MGI:95286]
ENSMUSG00000038776	16.2328	-2.10885	0.745479	-2.82885	0.00467151	0.0345842	4.28146	13.8326	0	21.8966	39.0692	18.317	Ephx1	epoxide hydrolase 1, microsomal [Source:MGI Symbol;Acc:MGI:95405]
ENSMUSG00000043753	17.3936	-2.07946	0.65294	-3.18477	0.00144869	0.0137468	5.70861	11.0661	3.01755	24.8556	20.8818	38.832	Dmrta1	doublesex and mab-3 related transcription factor like family A1 [Source:MGI Symbol;Acc:MGI:2653627]
ENSMUSG00000029106	31.5399	-2.07527	0.472525	-4.39187	1.12E-05	0.000199243	9.99007	6.91629	19.6141	46.1603	46.4789	60.0797	Add1	adducin 1 [Source:MGI Symbol;Acc:MGI:87918]
ENSMUSG00000033285	13.3647	-2.05069	0.751847	-2.72754	0.00638094	0.044302	2.85431	11.0661	1.50877	21.8966	20.8818	21.9804	Wdr3	WD repeat domain 3 [Source:MGI Symbol;Acc:MGI:2443143]
ENSMUSG00000041313	20.765	-2.03794	0.593714	-3.43253	0.000597974	0.00658728	12.8444	6.91629	4.52632	27.8146	25.5971	46.8914	Slc7a1	solute carrier family 7 (cationic amino acid transporter, y+ system), member 1 [Source:MGI Symbol;Acc:MGI:88117]
ENSMUSG00000043384	21.0499	-2.02217	0.658492	-3.07091	0.00213408	0.0187174	1.42715	4.14978	19.6141	21.3048	42.4372	37.3666	Gprasp1	G protein-coupled receptor associated sorting protein 1 [Source:MGI Symbol;Acc:MGI:1917418]
ENSMUSG00000002900	35.8739	-2.01876	0.495027	-4.07808	4.54E-05	0.000697574	14.2715	24.8987	3.01755	37.8752	62.6455	72.5352	Lamb1	laminin B1 [Source:MGI Symbol;Acc:MGI:96743]
ENSMUSG00000079019	62.8392	-2.01365	0.333531	-6.03737	1.57E-09	4.98E-08	27.1159	22.1321	25.6492	89.9535	128.659	83.5254	Insl3	insulin-like 3 [Source:MGI Symbol;Acc:MGI:108427]
ENSMUSG00000028641	16.6561	-2.0084	0.684342	-2.9348	0.00333768	0.0266826	2.85431	13.8326	3.01755	24.8556	20.2082	35.1686	P3h1	prolyl 3-hydroxylase 1 [Source:MGI Symbol;Acc:MGI:1888921]
ENSMUSG00000037376	18.2206	-2.00599	0.652818	-3.07282	0.00212046	0.0186739	1.42715	6.91629	13.579	21.8966	38.3956	27.1091	Trmt6	tRNA methyltransferase 6 [Source:MGI Symbol;Acc:MGI:1914176]
ENSMUSG00000031502	34.7434	-1.98866	0.453035	-4.38965	1.14E-05	0.00020086	12.8444	8.29955	21.1228	70.4241	52.5413	43.228	Col4a1	collagen, type IV, alpha 1 [Source:MGI Symbol;Acc:MGI:88454]
ENSMUSG00000026043	21.7445	-1.97535	0.640678	-3.08322	0.0020477	0.0182111	4.28146	1.38326	21.1228	40.8341	26.9443	35.9013	Col3a1	collagen, type III, alpha 1 [Source:MGI Symbol;Acc:MGI:88453]
ENSMUSG00000022479	12.8893	-1.97486	0.735334	-2.68566	0.00723863	0.0489166	4.28146	8.29955	3.01755	24.2638	15.493	21.9804	Vdr	vitamin D (1,25-dihydroxyvitamin D3) receptor [Source:MGI Symbol;Acc:MGI:103076]
ENSMUSG00000019820	18.7907	-1.9742	0.599987	-3.2904	0.00100047	0.0102097	4.28146	12.4493	6.0351	30.1818	28.2915	31.5052	Utrn	utrophin [Source:MGI Symbol;Acc:MGI:104631]
ENSMUSG00000019087	22.0408	-1.95349	0.67063	-2.91292	0.00358068	0.0280679	14.2715	8.29955	4.52632	34.3244	61.2982	9.52482	Atp6ap1	ATPase, H+ transporting, lysosomal accessory protein 1 [Source:MGI Symbol;Acc:MGI:109629]
ENSMUSG00000021054	25.2972	-1.9495	0.562203	-3.46761	0.000525116	0.00590274	8.56292	19.3656	3.01755	31.9572	55.9094	32.9705	Sgpp1	sphingosine-1-phosphate phosphatase 1 [Source:MGI Symbol;Acc:MGI:2135760]
ENSMUSG00000072941	42.3548	-1.94537	0.424444	-4.58333	4.58E-06	8.69E-05	12.8444	8.29955	31.6843	68.6487	74.7704	57.8816	Sod3	superoxide dismutase 3, extracellular [Source:MGI Symbol;Acc:MGI:103181]
ENSMUSG00000062380	59.0883	-1.93081	0.359678	-5.36816	7.95E-08	2.01E-06	34.2517	11.0661	28.6667	104.157	102.388	74.0006	Tubb3	tubulin, beta 3 class III [Source:MGI Symbol;Acc:MGI:107813]
ENSMUSG00000089774	20.8464	-1.92491	0.644506	-2.98665	0.00282054	0.0233734	17.1258	0	9.05265	37.2834	24.2499	37.3666	Slc5a3	solute carrier family 5 (inositol transporters), member 3 [Source:MGI Symbol;Acc:MGI:1858226]
ENSMUSG00000019899	62.1411	-1.92283	0.323282	-5.94785	2.72E-09	8.25E-08	31.3974	20.7489	25.6492	85.2191	96.9994	112.833	Lama2	laminin, alpha 2 [Source:MGI Symbol;Acc:MGI:99912]
ENSMUSG00000027931	32.0106	-1.89582	0.468007	-4.05083	5.10E-05	0.00077511	7.13577	9.68281	24.1404	49.1193	48.4997	53.4855	Npr1	natriuretic peptide receptor 1 [Source:MGI Symbol;Acc:MGI:97371]
ENSMUSG00000037706	38.3015	-1.89075	0.483801	-3.90812	9.30E-05	0.0013182	4.28146	23.5154	21.1228	89.9535	49.1733	41.7627	Cd81	CD81 antigen [Source:MGI Symbol;Acc:MGI:1096398]
ENSMUSG00000052911	65.3253	-1.88222	0.311861	-6.03543	1.59E-09	5.02E-08	27.1159	23.5154	33.193	96.4633	117.881	93.7829	Lamb2	laminin, beta 2 [Source:MGI Symbol;Acc:MGI:99916]
ENSMUSG00000045587	25.6886	-1.87469	0.565151	-3.31714	0.000909431	0.00941569	2.85431	17.9824	12.0702	30.7736	29.6387	60.8123	Lypd10	Ly6/PLAUR domain containing 10 [Source:MGI Symbol;Acc:MGI:2681843]
ENSMUSG00000008958	18.8939	-1.87352	0.583873	-3.20879	0.00133297	0.0127909	9.99007	9.68281	4.52632	30.7736	27.6179	30.7725	Vps72	vacuolar protein sorting 72 [Source:MGI Symbol;Acc:MGI:1202305]
ENSMUSG00000031980	123.633	-1.84137	0.235936	-7.80454	5.97E-15	3.27E-13	41.3874	47.0308	73.9299	182.274	208.145	189.031	Agt	angiotensinogen [Source:MGI Symbol;Acc:MGI:87963]
ENSMUSG00000025809	31.706	-1.83644	0.500339	-3.6704	0.00024217	0.00301327	5.70861	19.3656	16.5965	57.4045	63.3191	27.8418	Itgb1	integrin beta 1 (fibronectin receptor beta) [Source:MGI Symbol;Acc:MGI:96610]
ENSMUSG00000037260	21.0825	-1.8261	0.656407	-2.78197	0.00540301	0.0387161	0	6.91629	21.1228	25.4474	36.3748	36.6339	Hgsnat	heparan-alpha-glucosaminide N-acetyltransferase [Source:MGI Symbol;Acc:MGI:1196297]
ENSMUSG00000010307	17.3431	-1.8205	0.626822	-2.90433	0.00368038	0.0286321	9.99007	6.91629	6.0351	23.672	38.3956	19.0496	Tmem86a	transmembrane protein 86A [Source:MGI Symbol;Acc:MGI:1915143]
ENSMUSG00000057193	40.3406	-1.80419	0.493935	-3.65269	0.000259508	0.00319056	4.28146	38.7312	10.5614	70.4241	49.1733	68.8718	Slc44a2	solute carrier family 44, member 2 [Source:MGI Symbol;Acc:MGI:1915932]
ENSMUSG00000010554	22.2493	-1.77531	0.532752	-3.33234	0.000861184	0.00898372	9.99007	9.68281	10.5614	37.8752	39.7428	25.6438	Mettl16	methyltransferase 16, N6-methyladenosine [Source:MGI Symbol;Acc:MGI:1914743]
ENSMUSG00000023942	21.9824	-1.77374	0.560793	-3.16292	0.00156193	0.0146146	8.56292	16.5991	4.52632	43.2013	28.9651	30.0398	Slc29a1	solute carrier family 29 (nucleoside transporters), member 1 [Source:MGI Symbol;Acc:MGI:1927073]
ENSMUSG00000021913	26.3734	-1.7608	0.478702	-3.67828	0.000234811	0.00293495	12.8444	9.68281	13.579	37.8752	41.7636	42.4954	Ogdhl	oxoglutarate dehydrogenase-like [Source:MGI Symbol;Acc:MGI:3616088]
ENSMUSG00000050953	60.8517	-1.73967	0.388648	-4.47621	7.60E-06	0.000137365	8.56292	51.1806	24.1404	101.198	94.305	85.7234	Gja1	gap junction protein, alpha 1 [Source:MGI Symbol;Acc:MGI:95713]
ENSMUSG00000070644	17.4858	-1.7195	0.606307	-2.83601	0.00456806	0.0340318	11.4172	6.91629	6.0351	21.3048	26.2707	32.9705	Etnk2	ethanolamine kinase 2 [Source:MGI Symbol;Acc:MGI:2443760]
ENSMUSG00000030494	27.6694	-1.71256	0.584109	-2.93191	0.0033688	0.0268399	29.9702	2.76652	6.0351	41.4259	32.3331	53.4855	Rhpn2	rhophilin, Rho GTPase binding protein 2 [Source:MGI Symbol;Acc:MGI:1289234]
ENSMUSG00000031808	32.3817	-1.69982	0.437274	-3.8873	0.000101364	0.00141437	12.8444	22.1321	10.5614	48.5275	51.8677	48.3568	Slc27a1	solute carrier family 27 (fatty acid transporter), member 1 [Source:MGI Symbol;Acc:MGI:1347098]
ENSMUSG00000040488	69.7378	-1.69349	0.361546	-4.68404	2.81E-06	5.46E-05	35.6788	15.2158	48.2808	75.7503	147.52	95.9809	Ltbp4	latent transforming growth factor beta binding protein 4 [Source:MGI Symbol;Acc:MGI:1321395]
ENSMUSG00000034160	24.9791	-1.67125	0.552531	-3.02472	0.00248863	0.0211751	11.4172	13.8326	10.5614	37.8752	58.6038	17.5843	Ogt	O-linked N-acetylglucosamine (GlcNAc) transferase (UDP-N-acetylglucosamine:polypeptide-N-acetylglucosaminyl transferase) [Source:MGI Symbol;Acc:MGI:1339639]
ENSMUSG00000057880	30.9543	-1.66603	0.494212	-3.37108	0.000748745	0.00797182	28.5431	8.29955	7.54387	39.0587	45.1317	57.1489	Abat	4-aminobutyrate aminotransferase [Source:MGI Symbol;Acc:MGI:2443582]
ENSMUSG00000030647	25.7234	-1.6516	0.548909	-3.00889	0.00262208	0.0219935	22.8345	6.91629	7.54387	48.5275	45.8053	22.713	Ndufc2	NADH:ubiquinone oxidoreductase subunit C2 [Source:MGI Symbol;Acc:MGI:1344370]
ENSMUSG00000040236	46.9541	-1.6383	0.395118	-4.14637	3.38E-05	0.000538772	14.2715	35.9647	18.1053	79.3011	83.5273	50.5548	Trappc5	trafficking protein particle complex 5 [Source:MGI Symbol;Acc:MGI:1913932]
ENSMUSG00000037852	156.296	-1.62751	0.207402	-7.84712	4.26E-15	2.38E-13	94.1921	76.0792	58.8422	266.31	227.679	214.675	Cpe	carboxypeptidase E [Source:MGI Symbol;Acc:MGI:101932]
ENSMUSG00000033577	31.2414	-1.62206	0.451155	-3.59535	0.000323954	0.00389027	24.2616	11.0661	10.5614	43.7931	46.4789	51.2875	Myo6	myosin VI [Source:MGI Symbol;Acc:MGI:104785]
ENSMUSG00000025236	22.5984	-1.62036	0.552515	-2.9327	0.00336025	0.0267977	2.85431	12.4493	18.1053	34.9162	35.0276	32.2379	Adpgk	ADP-dependent glucokinase [Source:MGI Symbol;Acc:MGI:1919391]
ENSMUSG00000034219	40.8816	-1.61491	0.407105	-3.96681	7.28E-05	0.00106705	27.1159	15.2158	18.1053	62.1389	79.4856	43.228	Septin14	septin 14 [Source:MGI Symbol;Acc:MGI:1921472]
ENSMUSG00000067158	35.1489	-1.61363	0.418	-3.86035	0.000113225	0.00156171	15.6987	15.2158	21.1228	56.2209	41.09	61.545	Col4a4	collagen, type IV, alpha 4 [Source:MGI Symbol;Acc:MGI:104687]
ENSMUSG00000027444	30.4196	-1.58186	0.514943	-3.07192	0.00212686	0.0186739	12.8444	20.7489	12.0702	49.7111	67.3607	19.7823	Cstdc1	cystatin domain containing 1 [Source:MGI Symbol;Acc:MGI:1925859]
ENSMUSG00000037625	62.0482	-1.57877	0.335325	-4.70817	2.50E-06	4.91E-05	34.2517	33.1982	25.6492	76.9339	74.7704	127.486	Cldn11	claudin 11 [Source:MGI Symbol;Acc:MGI:106925]
ENSMUSG00000024188	23.9722	-1.57538	0.501306	-3.14255	0.00167481	0.0154262	11.4172	9.68281	15.0877	30.1818	35.7012	41.7627	Luc7l	Luc7-like [Source:MGI Symbol;Acc:MGI:1914228]
ENSMUSG00000031119	44.3823	-1.55413	0.367459	-4.2294	2.34E-05	0.000385641	14.2715	26.2819	27.1579	68.6487	63.9927	65.9411	Gpc4	glypican 4 [Source:MGI Symbol;Acc:MGI:104902]
ENSMUSG00000024054	34.5538	-1.53367	0.446989	-3.4311	0.000601135	0.0066045	29.9702	9.68281	13.579	46.7521	62.6455	44.6934	Smchd1	SMC hinge domain containing 1 [Source:MGI Symbol;Acc:MGI:1921605]
ENSMUSG00000096472	35.4414	-1.5323	0.429955	-3.56385	0.000365453	0.00430724	25.6888	15.2158	13.579	37.2834	58.6038	62.2777	Cdkn2d	cyclin dependent kinase inhibitor 2D [Source:MGI Symbol;Acc:MGI:105387]
ENSMUSG00000024665	55.3542	-1.52244	0.358023	-4.25237	2.12E-05	0.000349522	14.2715	45.6475	25.6492	88.1781	82.1801	76.1986	Fads2	fatty acid desaturase 2 [Source:MGI Symbol;Acc:MGI:1930079]
ENSMUSG00000036391	22.2373	-1.50746	0.525501	-2.86861	0.00412279	0.0315393	7.13577	11.0661	16.5965	27.8146	36.3748	34.4359	Sec24a	SEC24 homolog A, COPII coat complex component [Source:MGI Symbol;Acc:MGI:1924621]
ENSMUSG00000064063	282.992	-1.49155	0.145406	-10.2578	1.09E-24	1.07E-22	142.715	161.841	140.316	382.302	430.435	440.34	BC048507	cDNA sequence BC048507 [Source:MGI Symbol;Acc:MGI:3040680]
ENSMUSG00000031451	26.5697	-1.48362	0.537042	-2.76258	0.00573467	0.0407043	19.9801	4.14978	18.1053	53.2619	39.7428	24.1784	Gas6	growth arrest specific 6 [Source:MGI Symbol;Acc:MGI:95660]
ENSMUSG00000033161	104.997	-1.4812	0.247759	-5.97837	2.25E-09	6.96E-08	48.5232	48.4141	69.4036	139.073	142.131	182.437	Atp1a1	ATPase, Na+/K+ transporting, alpha 1 polypeptide [Source:MGI Symbol;Acc:MGI:88105]
ENSMUSG00000028763	97.2622	-1.48054	0.241519	-6.13012	8.78E-10	2.88E-08	45.6689	53.9471	54.3159	138.481	138.763	152.397	Hspg2	perlecan (heparan sulfate proteoglycan 2) [Source:MGI Symbol;Acc:MGI:96257]
ENSMUSG00000017009	44.6864	-1.46867	0.407682	-3.60249	0.000315186	0.00379602	9.99007	20.7489	40.7369	59.7717	76.7912	60.0797	Sdc4	syndecan 4 [Source:MGI Symbol;Acc:MGI:1349164]
ENSMUSG00000022390	57.8041	-1.46561	0.382308	-3.83359	0.000126285	0.00170764	22.8345	55.3303	13.579	82.8519	99.6938	72.5352	Zc3h7b	zinc finger CCCH type containing 7B [Source:MGI Symbol;Acc:MGI:1328310]
ENSMUSG00000026576	71.4428	-1.45897	0.295838	-4.93166	8.15E-07	1.73E-05	45.6689	45.6475	22.6316	103.565	107.104	104.04	Atp1b1	ATPase, Na+/K+ transporting, beta 1 polypeptide [Source:MGI Symbol;Acc:MGI:88108]
ENSMUSG00000092035	44.411	-1.45663	0.443136	-3.28711	0.00101223	0.0103106	29.9702	11.0661	30.1755	41.4259	50.5205	103.308	Peg10	paternally expressed 10 [Source:MGI Symbol;Acc:MGI:2157785]
ENSMUSG00000056899	50.1487	-1.45643	0.345278	-4.21814	2.46E-05	0.000401408	34.2517	26.2819	19.6141	63.9143	74.7704	82.06	Immp2l	IMP2 inner mitochondrial membrane peptidase-like (S. cerevisiae) [Source:MGI Symbol;Acc:MGI:2135611]
ENSMUSG00000037752	48.7417	-1.44763	0.388566	-3.72557	0.000194878	0.00248087	25.6888	38.7312	13.579	52.0783	70.0551	92.3175	Xkr8	X-linked Kx blood group related 8 [Source:MGI Symbol;Acc:MGI:2685877]
ENSMUSG00000025510	39.0374	-1.43156	0.452798	-3.16158	0.00156917	0.0146657	4.28146	30.4317	28.6667	52.0783	66.0135	52.7529	Cd151	CD151 antigen [Source:MGI Symbol;Acc:MGI:1096360]
ENSMUSG00000027342	28.1959	-1.42114	0.470746	-3.01891	0.00253684	0.0215189	21.4073	12.4493	12.0702	40.2423	30.9859	52.0202	Pcna	proliferating cell nuclear antigen [Source:MGI Symbol;Acc:MGI:97503]
ENSMUSG00000020805	42.4222	-1.41359	0.435178	-3.2483	0.00116096	0.0113859	38.5331	6.91629	24.1404	60.3635	49.8469	74.7332	Slc13a5	solute carrier family 13 (sodium-dependent citrate transporter), member 5 [Source:MGI Symbol;Acc:MGI:3037150]
ENSMUSG00000022912	51.541	-1.40977	0.368809	-3.82249	0.000132109	0.00177109	34.2517	30.4317	19.6141	69.8323	52.5413	102.575	Pros1	protein S (alpha) [Source:MGI Symbol;Acc:MGI:1095733]
ENSMUSG00000028961	36.7554	-1.39939	0.402446	-3.47722	0.000506639	0.00571837	19.9801	15.2158	25.6492	58.5881	58.6038	42.4954	Pgd	phosphogluconate dehydrogenase [Source:MGI Symbol;Acc:MGI:97553]
ENSMUSG00000013083	65.7909	-1.38639	0.302861	-4.57764	4.70E-06	8.89E-05	31.3974	42.881	34.7018	79.3011	93.6314	112.833	2200002J24Rik	RIKEN cDNA 2200002J24 gene [Source:MGI Symbol;Acc:MGI:1916397]
ENSMUSG00000020153	24.9748	-1.38596	0.497634	-2.7851	0.0053512	0.0385791	15.6987	16.5991	9.05265	31.3654	47.8261	29.3071	Ndufs7	NADH:ubiquinone oxidoreductase core subunit S7 [Source:MGI Symbol;Acc:MGI:1922656]
ENSMUSG00000078622	37.2546	-1.38508	0.387361	-3.57568	0.000349321	0.00414074	22.8345	17.9824	21.1228	57.4045	48.4997	55.6836	Ccdc47	coiled-coil domain containing 47 [Source:MGI Symbol;Acc:MGI:1914413]
ENSMUSG00000032348	97.3766	-1.37954	0.294066	-4.69127	2.72E-06	5.29E-05	74.212	23.5154	64.8773	131.971	155.603	134.08	Gsta4	glutathione S-transferase, alpha 4 [Source:MGI Symbol;Acc:MGI:1309515]
ENSMUSG00000022437	39.8108	-1.37889	0.453185	-3.04266	0.00234497	0.0201395	37.106	11.0661	18.1053	48.5275	39.0692	84.9907	Samm50	SAMM50 sorting and assembly machinery component [Source:MGI Symbol;Acc:MGI:1915903]
ENSMUSG00000020733	27.5305	-1.37425	0.471608	-2.91397	0.00356868	0.0280004	15.6987	16.5991	13.579	27.8146	51.1941	40.2973	Nherf1	NHERF family PDZ scaffold protein 1 [Source:MGI Symbol;Acc:MGI:1349482]
ENSMUSG00000039742	2667.79	-1.37016	0.0504777	-27.1439	2.99E-162	8.24E-159	1395.76	1525.73	1543.48	3802.31	3766.14	3973.32	Garin1b	golgi associated RAB2 interactor 1B [Source:MGI Symbol;Acc:MGI:3032524]
ENSMUSG00000004393	33.8697	-1.36892	0.446265	-3.06751	0.00215847	0.0188912	17.1258	9.68281	30.1755	40.2423	61.2982	44.6934	Ddx56	DEAD box helicase 56 [Source:MGI Symbol;Acc:MGI:1277172]
ENSMUSG00000032902	49.2774	-1.36055	0.385717	-3.52731	0.000419798	0.00485767	17.1258	19.3656	46.772	78.7093	54.5622	79.1293	Slc16a1	solute carrier family 16 (monocarboxylic acid transporters), member 1 [Source:MGI Symbol;Acc:MGI:106013]
ENSMUSG00000002602	42.572	-1.35996	0.387972	-3.5053	0.000456092	0.00523828	31.3974	23.5154	16.5965	56.8127	79.4856	47.6241	Axl	AXL receptor tyrosine kinase [Source:MGI Symbol;Acc:MGI:1347244]
ENSMUSG00000024140	51.172	-1.35728	0.356779	-3.80426	0.000142228	0.00188921	35.6788	27.6652	22.6316	51.4865	88.2425	81.3273	Epas1	endothelial PAS domain protein 1 [Source:MGI Symbol;Acc:MGI:109169]
ENSMUSG00000021939	38.9066	-1.35493	0.397965	-3.40465	0.000662477	0.00711754	18.553	33.1982	13.579	56.2209	52.5413	59.347	Ctsb	cathepsin B [Source:MGI Symbol;Acc:MGI:88561]
ENSMUSG00000027875	43.2424	-1.3542	0.369175	-3.66819	0.000244278	0.00303149	28.5431	27.6652	16.5965	70.4241	53.215	63.0104	Hmgcs2	3-hydroxy-3-methylglutaryl-Coenzyme A synthase 2 [Source:MGI Symbol;Acc:MGI:101939]
ENSMUSG00000027962	57.3827	-1.34338	0.362374	-3.70716	0.000209596	0.00265595	49.9504	30.4317	16.5965	60.9553	88.9161	97.4463	Vcam1	vascular cell adhesion molecule 1 [Source:MGI Symbol;Acc:MGI:98926]
ENSMUSG00000091556	141.639	-1.32747	0.202379	-6.55937	5.40E-11	2.19E-09	79.9206	71.9294	90.5265	188.192	223.638	195.625	Gm14569	predicted gene 14569 [Source:MGI Symbol;Acc:MGI:3705243]
ENSMUSG00000020263	32.8315	-1.32586	0.418852	-3.16545	0.00154842	0.0145376	12.8444	20.7489	22.6316	49.1193	41.09	50.5548	Appl2	adaptor protein, phosphotyrosine interaction, PH domain and leucine zipper containing 2 [Source:MGI Symbol;Acc:MGI:2384914]
ENSMUSG00000039952	64.4994	-1.32387	0.2954	-4.48161	7.41E-06	0.000134518	35.6788	42.881	31.6843	89.3617	85.5481	101.842	Dag1	dystroglycan 1 [Source:MGI Symbol;Acc:MGI:101864]
ENSMUSG00000079111	50.2797	-1.32272	0.334748	-3.9514	7.77E-05	0.00112618	29.9702	29.0484	27.1579	81.6683	61.2982	72.5352	Kdelr2	KDEL (Lys-Asp-Glu-Leu) endoplasmic reticulum protein retention receptor 2 [Source:MGI Symbol;Acc:MGI:1914163]
ENSMUSG00000025056	69.0455	-1.31579	0.332785	-3.95388	7.69E-05	0.00111651	35.6788	26.2819	57.3334	129.604	94.305	71.0698	Nr0b1	nuclear receptor subfamily 0, group B, member 1 [Source:MGI Symbol;Acc:MGI:1352460]
ENSMUSG00000021712	51.8572	-1.31344	0.340096	-3.86197	0.000112476	0.0015561	24.2616	33.1982	31.6843	57.4045	78.1384	86.4561	Trim23	tripartite motif-containing 23 [Source:MGI Symbol;Acc:MGI:1933161]
ENSMUSG00000026223	92.1999	-1.29791	0.255823	-5.07344	3.91E-07	8.87E-06	55.659	45.6475	58.8422	143.807	107.104	142.14	Itm2c	integral membrane protein 2C [Source:MGI Symbol;Acc:MGI:1927594]
ENSMUSG00000058267	36.6976	-1.29693	0.422146	-3.07222	0.00212471	0.0186739	28.5431	11.0661	24.1404	42.6095	47.1525	66.6738	Mrps14	mitochondrial ribosomal protein S14 [Source:MGI Symbol;Acc:MGI:1928141]
ENSMUSG00000030428	34.3138	-1.29253	0.440438	-2.93464	0.00333936	0.0266826	15.6987	33.1982	10.5614	56.2209	49.1733	41.03	Ttyh1	tweety family member 1 [Source:MGI Symbol;Acc:MGI:1889007]
ENSMUSG00000032870	36.4639	-1.27403	0.452012	-2.81857	0.00482374	0.0354887	28.5431	29.0484	6.0351	40.8341	49.8469	64.4757	Smap2	small ArfGAP 2 [Source:MGI Symbol;Acc:MGI:1917030]
ENSMUSG00000069049	28.634	-1.27332	0.447353	-2.84634	0.0044225	0.0332472	19.9801	16.5991	13.579	35.508	37.0484	49.0895	Eif2s3y	eukaryotic translation initiation factor 2, subunit 3, structural gene Y-linked [Source:MGI Symbol;Acc:MGI:1349430]
ENSMUSG00000038034	36.6175	-1.27329	0.450379	-2.82716	0.00469628	0.0346963	37.106	16.5991	10.5614	69.8323	43.1109	42.4954	Igsf8	immunoglobulin superfamily, member 8 [Source:MGI Symbol;Acc:MGI:2154090]
ENSMUSG00000032554	30.1498	-1.27011	0.443108	-2.86637	0.00415203	0.0317043	14.2715	22.1321	16.5965	43.7931	51.8677	32.2379	Trf	transferrin [Source:MGI Symbol;Acc:MGI:98821]
ENSMUSG00000031342	29.1271	-1.26561	0.451978	-2.80016	0.00510771	0.0371806	18.553	23.5154	9.05265	42.0177	38.3956	43.228	Gpm6b	glycoprotein m6b [Source:MGI Symbol;Acc:MGI:107672]
ENSMUSG00000035704	37.3777	-1.26445	0.426371	-2.96562	0.00302075	0.0245644	19.9801	29.0484	16.5965	31.9572	59.2774	67.4064	Alg8	ALG8 alpha-1,3-glucosyltransferase [Source:MGI Symbol;Acc:MGI:2141959]
ENSMUSG00000001435	45.9728	-1.26112	0.396639	-3.17952	0.00147521	0.0139773	41.3874	29.0484	10.5614	78.1175	55.9094	60.8123	Col18a1	collagen, type XVIII, alpha 1 [Source:MGI Symbol;Acc:MGI:88451]
ENSMUSG00000070697	36.4509	-1.25137	0.410889	-3.04551	0.00232284	0.0200018	32.8245	13.8326	18.1053	57.9963	50.5205	45.4261	Utp3	UTP3 small subunit processome component [Source:MGI Symbol;Acc:MGI:1919230]
ENSMUSG00000086361	34.7612	-1.23895	0.413193	-2.99849	0.00271322	0.0226202	28.5431	12.4493	21.1228	43.7931	49.1733	53.4855	Gm6569	predicted gene 6569 [Source:MGI Symbol;Acc:MGI:3647277]
ENSMUSG00000028567	95.3409	-1.23267	0.25854	-4.7678	1.86E-06	3.72E-05	55.659	38.7312	76.9475	143.215	130.006	127.486	Txndc12	thioredoxin domain containing 12 (endoplasmic reticulum) [Source:MGI Symbol;Acc:MGI:1913323]
ENSMUSG00000040249	151.292	-1.22945	0.191685	-6.41389	1.42E-10	5.48E-09	78.4934	103.744	89.0177	214.823	212.86	208.813	Lrp1	low density lipoprotein receptor-related protein 1 [Source:MGI Symbol;Acc:MGI:96828]
ENSMUSG00000026712	79.1651	-1.22921	0.304425	-4.03781	5.40E-05	0.000811941	52.8047	51.1806	37.7194	104.157	77.4648	151.664	Mrc1	mannose receptor, C type 1 [Source:MGI Symbol;Acc:MGI:97142]
ENSMUSG00000040485	33.1698	-1.21582	0.429585	-2.83021	0.0046517	0.0344994	22.8345	24.8987	12.0702	56.2209	47.8261	35.1686	Lrrc52	leucine rich repeat containing 52 [Source:MGI Symbol;Acc:MGI:1924118]
ENSMUSG00000030744	45.4076	-1.21271	0.346663	-3.49824	0.000468338	0.00535188	28.5431	24.8987	28.6667	55.6291	68.0343	66.6738	Rps3	ribosomal protein S3 [Source:MGI Symbol;Acc:MGI:1350917]
ENSMUSG00000020273	40.6594	-1.20992	0.379921	-3.18466	0.00144922	0.0137468	25.6888	17.9824	30.1755	57.9963	66.6871	45.4261	Papolg	poly(A) polymerase gamma [Source:MGI Symbol;Acc:MGI:2442119]
ENSMUSG00000005142	46.2711	-1.20899	0.36593	-3.30388	0.00095358	0.00982354	25.6888	20.7489	37.7194	71.0159	74.0968	48.3568	Man2b1	mannosidase 2, alpha B1 [Source:MGI Symbol;Acc:MGI:107286]
ENSMUSG00000027463	65.2305	-1.20565	0.391429	-3.08012	0.00206916	0.0183427	64.2219	17.9824	36.2106	95.8715	52.5413	124.555	Slc52a3	solute carrier protein family 52, member 3 [Source:MGI Symbol;Acc:MGI:1916948]
ENSMUSG00000003363	59.9017	-1.19985	0.36885	-3.25294	0.00114218	0.0113014	44.2417	15.2158	49.7896	59.1799	103.062	87.9214	Pld3	phospholipase D family member 3 [Source:MGI Symbol;Acc:MGI:1333782]
ENSMUSG00000021477	615.06	-1.19722	0.103432	-11.575	5.52E-31	7.02E-29	385.331	403.912	330.422	882.373	782.731	905.591	Ctsl	cathepsin L [Source:MGI Symbol;Acc:MGI:88564]
ENSMUSG00000028127	31.4736	-1.19548	0.419648	-2.84878	0.00438872	0.0331441	18.553	22.1321	16.5965	42.6095	38.3956	50.5548	Abcd3	ATP-binding cassette, sub-family D member 3 [Source:MGI Symbol;Acc:MGI:1349216]
ENSMUSG00000034653	43.0531	-1.19301	0.393324	-3.03314	0.00242023	0.0206783	12.8444	41.4978	24.1404	66.2815	58.6038	54.9509	Ythdc2	YTH domain containing 2 [Source:MGI Symbol;Acc:MGI:2448561]
ENSMUSG00000025268	44.0221	-1.18645	0.40182	-2.95269	0.00315013	0.0254164	22.8345	30.4317	27.1579	33.7326	69.3815	80.5947	Maged2	MAGE family member D2 [Source:MGI Symbol;Acc:MGI:1933391]
ENSMUSG00000042104	64.8516	-1.18451	0.332956	-3.55757	0.000374305	0.00439277	49.9504	42.881	25.6492	73.3831	73.4232	123.823	Uggt2	UDP-glucose glycoprotein glucosyltransferase 2 [Source:MGI Symbol;Acc:MGI:1913685]
ENSMUSG00000018593	379.155	-1.17981	0.125849	-9.3748	6.93E-21	5.45E-19	259.742	200.572	236.878	531.436	551.011	495.291	Sparc	secreted acidic cysteine rich glycoprotein [Source:MGI Symbol;Acc:MGI:98373]
ENSMUSG00000028292	37.546	-1.16977	0.421925	-2.77247	0.00556327	0.0396924	29.9702	15.2158	24.1404	49.1193	35.0276	71.8025	Rars2	arginyl-tRNA synthetase 2, mitochondrial [Source:MGI Symbol;Acc:MGI:1923596]
ENSMUSG00000032383	39.3328	-1.15385	0.377585	-3.05588	0.00224405	0.0194547	17.1258	31.8149	24.1404	52.6701	54.5622	55.6836	Ppib	peptidylprolyl isomerase B [Source:MGI Symbol;Acc:MGI:97750]
ENSMUSG00000031966	125.943	-1.14938	0.272299	-4.22101	2.43E-05	0.000397903	37.106	118.96	78.4563	171.03	168.402	181.704	Glb1l3	galactosidase, beta 1 like 3 [Source:MGI Symbol;Acc:MGI:1918143]
ENSMUSG00000038417	40.6301	-1.14164	0.414362	-2.75517	0.00586625	0.0414602	21.4073	33.1982	21.1228	34.9162	52.5413	80.5947	Fig4	FIG4 phosphoinositide 5-phosphatase [Source:MGI Symbol;Acc:MGI:2143585]
ENSMUSG00000049123	114.871	-1.13833	0.216133	-5.2668	1.39E-07	3.39E-06	72.7848	76.0792	66.3861	166.887	157.624	149.466	Catsperg2	cation channel sperm associated auxiliary subunit gamma 2 [Source:MGI Symbol;Acc:MGI:1923968]
ENSMUSG00000002814	42.9357	-1.13824	0.367476	-3.09744	0.00195198	0.0176062	35.6788	22.1321	22.6316	62.7307	48.4997	65.9411	Top3a	topoisomerase (DNA) III alpha [Source:MGI Symbol;Acc:MGI:1197527]
ENSMUSG00000037681	73.5694	-1.13298	0.308972	-3.66694	0.000245472	0.00304062	62.7947	33.1982	42.2457	105.932	73.4232	123.823	Esyt3	extended synaptotagmin-like protein 3 [Source:MGI Symbol;Acc:MGI:1098699]
ENSMUSG00000047879	41.4606	-1.12743	0.403158	-2.79648	0.00516621	0.0375072	24.2616	41.4978	12.0702	63.9143	57.9302	49.0895	Usp14	ubiquitin specific peptidase 14 [Source:MGI Symbol;Acc:MGI:1928898]
ENSMUSG00000006373	37.4866	-1.12391	0.410795	-2.73593	0.00622048	0.0434505	12.8444	24.8987	33.193	61.5471	40.4164	52.0202	Pgrmc1	progesterone receptor membrane component 1 [Source:MGI Symbol;Acc:MGI:1858305]
ENSMUSG00000024640	40.2026	-1.12264	0.394208	-2.84783	0.00440185	0.0331826	34.2517	24.8987	16.5965	44.9767	71.4023	49.0895	Psat1	phosphoserine aminotransferase 1 [Source:MGI Symbol;Acc:MGI:2183441]
ENSMUSG00000019179	39.4588	-1.12193	0.390516	-2.87294	0.00406673	0.0311682	18.553	31.8149	24.1404	53.8537	67.3607	41.03	Mdh2	malate dehydrogenase 2, NAD (mitochondrial) [Source:MGI Symbol;Acc:MGI:97050]
ENSMUSG00000020368	726.935	-1.12146	0.090921	-12.3344	5.91E-35	9.21E-33	422.437	455.092	496.387	952.205	1051.5	983.988	Canx	calnexin [Source:MGI Symbol;Acc:MGI:88261]
ENSMUSG00000047126	554.785	-1.11675	0.121031	-9.22695	2.78E-20	2.11E-18	421.01	327.832	301.755	839.763	759.155	679.193	Cltc	clathrin heavy chain [Source:MGI Symbol;Acc:MGI:2388633]
ENSMUSG00000000628	88.4929	-1.11668	0.307497	-3.63151	0.000281763	0.00342342	41.3874	33.1982	93.544	110.075	117.208	135.546	Hk2	hexokinase 2 [Source:MGI Symbol;Acc:MGI:1315197]
ENSMUSG00000007097	81.431	-1.11152	0.29032	-3.8286	0.000128876	0.00173699	29.9702	53.9471	70.9124	101.789	128.659	103.308	Atp1a2	ATPase, Na+/K+ transporting, alpha 2 polypeptide [Source:MGI Symbol;Acc:MGI:88106]
ENSMUSG00000085684	43.258	-1.11144	0.407569	-2.727	0.00639136	0.0443359	11.4172	33.1982	37.7194	73.9749	59.2774	43.9607	4930469K13Rik	RIKEN cDNA 4930469K13 gene [Source:MGI Symbol;Acc:MGI:1924124]
ENSMUSG00000037286	70.8824	-1.10653	0.315782	-3.50411	0.000458144	0.00524991	37.106	53.9471	43.7545	114.217	61.9718	114.298	Stag1	STAG1 cohesin complex component [Source:MGI Symbol;Acc:MGI:1098658]
ENSMUSG00000067873	79.2295	-1.10632	0.269469	-4.10555	4.03E-05	0.000633558	64.2219	45.6475	40.7369	107.116	99.6938	117.961	Htatsf1	HIV TAT specific factor 1 [Source:MGI Symbol;Acc:MGI:1919709]
ENSMUSG00000072995	85.2858	-1.10256	0.254963	-4.32438	1.53E-05	0.000261654	59.9404	51.1806	51.2983	101.789	118.555	128.951	Cpxcr1	CPX chromosome region, candidate 1 [Source:MGI Symbol;Acc:MGI:2685989]
ENSMUSG00000020059	264.305	-1.09651	0.162964	-6.72855	1.71E-11	7.11E-10	176.967	181.207	146.351	333.775	315.248	432.28	Sycp3	synaptonemal complex protein 3 [Source:MGI Symbol;Acc:MGI:109542]
ENSMUSG00000025130	83.3963	-1.093	0.287863	-3.79693	0.000146497	0.00193348	45.6689	35.9647	78.4563	100.014	109.124	131.149	P4hb	prolyl 4-hydroxylase, beta polypeptide [Source:MGI Symbol;Acc:MGI:97464]
ENSMUSG00000030826	41.7311	-1.09059	0.394663	-2.76333	0.00572144	0.0406454	22.8345	37.348	19.6141	63.3225	38.3956	68.8718	Bcat2	branched chain aminotransferase 2, mitochondrial [Source:MGI Symbol;Acc:MGI:1276534]
ENSMUSG00000030847	53.6131	-1.0873	0.330911	-3.28577	0.00101703	0.0103228	35.6788	41.4978	25.6492	78.1175	82.8537	57.8816	Bag3	BCL2-associated athanogene 3 [Source:MGI Symbol;Acc:MGI:1352493]
ENSMUSG00000005481	83.7862	-1.08574	0.256875	-4.22673	2.37E-05	0.000388686	62.7947	47.0308	51.2983	126.053	107.104	108.436	Ddx39a	DEAD box helicase 39a [Source:MGI Symbol;Acc:MGI:1915528]
ENSMUSG00000060376	57.765	-1.08358	0.307386	-3.52514	0.000423255	0.00489081	31.3974	34.5815	45.2632	76.9339	73.4232	84.9907	Bckdha	branched chain ketoacid dehydrogenase E1, alpha polypeptide [Source:MGI Symbol;Acc:MGI:107701]
ENSMUSG00000025925	98.3218	-1.07946	0.264151	-4.08652	4.38E-05	0.000680049	74.212	38.7312	76.9475	124.278	155.603	120.159	Terf1	telomeric repeat binding factor 1 [Source:MGI Symbol;Acc:MGI:109634]
ENSMUSG00000005470	85.6502	-1.07922	0.250985	-4.29992	1.71E-05	0.000288089	61.3676	56.7136	46.772	109.483	117.208	122.357	Asf1b	anti-silencing function 1B histone chaperone [Source:MGI Symbol;Acc:MGI:1914179]
ENSMUSG00000019929	42.4818	-1.0755	0.369788	-2.90842	0.00363259	0.0284108	19.9801	29.0484	33.193	70.4241	53.8886	48.3568	Dcn	decorin [Source:MGI Symbol;Acc:MGI:94872]
ENSMUSG00000022037	2295.68	-1.07398	0.0561145	-19.139	1.19E-81	6.58E-79	1604.12	1365.28	1466.53	3020.54	3161.24	3156.38	Clu	clusterin [Source:MGI Symbol;Acc:MGI:88423]
ENSMUSG00000042961	50.7743	-1.07383	0.34955	-3.07204	0.00212603	0.0186739	45.6689	20.7489	31.6843	58.5881	67.3607	80.5947	Egflam	EGF-like, fibronectin type III and laminin G domains [Source:MGI Symbol;Acc:MGI:2146149]
ENSMUSG00000005220	64.9528	-1.06877	0.305661	-3.49657	0.000471272	0.00537797	47.0961	49.7973	28.6667	98.2387	71.4023	94.5156	Corin	corin, serine peptidase [Source:MGI Symbol;Acc:MGI:1349451]
ENSMUSG00000053279	122.275	-1.06326	0.269316	-3.94799	7.88E-05	0.00113832	39.9603	78.8457	119.193	175.764	170.423	149.466	Aldh1a1	aldehyde dehydrogenase family 1, subfamily A1 [Source:MGI Symbol;Acc:MGI:1353450]
ENSMUSG00000109858	63.3608	-1.06264	0.318543	-3.33595	0.000850097	0.00891307	38.5331	53.9471	30.1755	63.9143	98.3466	95.2482	Pfn5	profilin 5 [Source:MGI Symbol;Acc:MGI:5804915]
ENSMUSG00000062773	238.661	-1.05877	0.16281	-6.5031	7.87E-11	3.14E-09	178.394	159.075	126.737	337.917	345.56	284.279	Tex101	testis expressed gene 101 [Source:MGI Symbol;Acc:MGI:1930791]
ENSMUSG00000041550	106.523	-1.04887	0.25698	-4.08152	4.47E-05	0.00069179	57.0861	56.7136	95.0528	149.725	167.728	112.833	Serpina5	serine (or cysteine) peptidase inhibitor, clade A, member 5 [Source:MGI Symbol;Acc:MGI:107817]
ENSMUSG00000024253	48.5415	-1.04481	0.356852	-2.92785	0.00341314	0.0271148	45.6689	19.3656	30.1755	66.8733	72.7496	56.4163	Dync2li1	dynein cytoplasmic 2 light intermediate chain 1 [Source:MGI Symbol;Acc:MGI:1913996]
ENSMUSG00000029517	92.6427	-1.04436	0.268459	-3.89021	0.000100156	0.00140015	49.9504	81.6123	49.7896	140.256	136.069	98.1789	Ankrd7	ankyrin repeat domain 7 [Source:MGI Symbol;Acc:MGI:1922446]
ENSMUSG00000041958	62.3737	-1.03947	0.302175	-3.43995	0.000581826	0.00644039	39.9603	35.9647	46.772	97.0551	68.0343	86.4561	Pigs	phosphatidylinositol glycan anchor biosynthesis, class S [Source:MGI Symbol;Acc:MGI:2687325]
ENSMUSG00000052133	43.6846	-1.03764	0.37354	-2.77785	0.00547191	0.0391108	17.1258	42.881	25.6492	55.6291	59.2774	61.545	Sema5b	sema domain, seven thrombospondin repeats (type 1 and type 1-like), transmembrane domain (TM) and short cytoplasmic domain, (semaphorin) 5B [Source:MGI Symbol;Acc:MGI:107555]
ENSMUSG00000021194	86.8895	-1.03567	0.289323	-3.57964	0.000344071	0.00409024	32.8245	74.696	63.3685	128.42	91.6106	130.417	Chga	chromogranin A [Source:MGI Symbol;Acc:MGI:88394]
ENSMUSG00000049598	108.545	-1.03111	0.239526	-4.3048	1.67E-05	0.000282964	58.5133	63.6299	92.0352	127.237	142.805	167.051	Vsig8	V-set and immunoglobulin domain containing 8 [Source:MGI Symbol;Acc:MGI:3642995]
ENSMUSG00000020888	56.2751	-1.02092	0.359638	-2.83874	0.00452916	0.0339496	54.2318	16.5991	40.7369	61.5471	78.812	85.7234	Dvl2	dishevelled segment polarity protein 2 [Source:MGI Symbol;Acc:MGI:106613]
ENSMUSG00000022892	159.916	-1.01609	0.199405	-5.0956	3.48E-07	7.93E-06	114.172	87.1453	116.176	191.743	196.02	254.24	App	amyloid beta precursor protein [Source:MGI Symbol;Acc:MGI:88059]
ENSMUSG00000017132	281.24	-1.01529	0.163826	-6.19733	5.74E-10	1.97E-08	242.616	139.709	176.527	389.404	385.303	353.884	Cyth1	cytohesin 1 [Source:MGI Symbol;Acc:MGI:1334257]
ENSMUSG00000045210	88.6727	-1.00893	0.270608	-3.72837	0.000192724	0.00246483	51.3775	70.5462	54.3159	102.973	99.6938	153.13	Vcpip1	valosin containing protein (p97)/p47 complex interacting protein 1 [Source:MGI Symbol;Acc:MGI:1917925]
ENSMUSG00000039187	54.1657	-1.00357	0.327889	-3.0607	0.00220822	0.0192654	24.2616	37.348	46.772	81.6683	65.3399	69.6045	Fanci	Fanconi anemia, complementation group I [Source:MGI Symbol;Acc:MGI:2384790]
ENSMUSG00000019877	47.3446	-1.00301	0.3552	-2.82378	0.00474604	0.0350106	32.8245	35.9647	25.6492	56.2209	82.8537	50.5548	Serinc1	serine incorporator 1 [Source:MGI Symbol;Acc:MGI:1926228]
ENSMUSG00000027778	289.582	-0.998866	0.156423	-6.38566	1.71E-10	6.41E-09	186.957	235.154	156.913	427.871	391.366	339.23	Ift80	intraflagellar transport 80 [Source:MGI Symbol;Acc:MGI:1915509]
ENSMUSG00000030057	116.416	-0.987413	0.215352	-4.58512	4.54E-06	8.64E-05	74.212	85.762	73.9299	144.399	150.214	169.981	Cnbp	cellular nucleic acid binding protein [Source:MGI Symbol;Acc:MGI:88431]
ENSMUSG00000002308	174.36	-0.985746	0.180369	-5.46515	4.63E-08	1.20E-06	124.162	112.044	114.667	205.946	260.012	229.328	Cd320	CD320 antigen [Source:MGI Symbol;Acc:MGI:1860083]
ENSMUSG00000029682	59.3889	-0.985555	0.351233	-2.80598	0.0050163	0.0366767	54.2318	47.0308	18.1053	98.8305	70.7287	67.4064	Spam1	sperm adhesion molecule 1 [Source:MGI Symbol;Acc:MGI:109335]
ENSMUSG00000079666	217.278	-0.985496	0.165977	-5.93754	2.89E-09	8.72E-08	115.599	161.841	159.93	272.228	285.609	308.458	Pttg1ip2	PTTG1IP family member 2 [Source:MGI Symbol;Acc:MGI:2686532]
ENSMUSG00000010592	83.6428	-0.979826	0.286227	-3.42325	0.000618777	0.00674451	47.0961	70.5462	51.2983	146.766	99.6938	86.4561	Dazl	deleted in azoospermia-like [Source:MGI Symbol;Acc:MGI:1342328]
ENSMUSG00000005883	48.8036	-0.979398	0.34645	-2.82696	0.00469924	0.0346963	37.106	40.1145	21.1228	73.9749	54.5622	65.9411	Spo11	SPO11 initiator of meiotic double stranded breaks [Source:MGI Symbol;Acc:MGI:1349669]
ENSMUSG00000060985	302.147	-0.977579	0.132052	-7.40299	1.33E-13	6.32E-12	201.229	214.405	194.632	388.22	421.678	392.716	Tdrd5	tudor domain containing 5 [Source:MGI Symbol;Acc:MGI:2684949]
ENSMUSG00000015243	60.1174	-0.969171	0.330368	-2.93362	0.00335039	0.0267449	55.659	33.1982	33.193	89.9535	92.2842	56.4163	Abca1	ATP-binding cassette, sub-family A member 1 [Source:MGI Symbol;Acc:MGI:99607]
ENSMUSG00000019810	80.0803	-0.961033	0.288645	-3.32946	0.000870151	0.00906581	77.0663	53.9471	31.6843	97.6469	113.166	106.971	Fuca2	fucosidase, alpha-L- 2, plasma [Source:MGI Symbol;Acc:MGI:1914098]
ENSMUSG00000001525	70.4781	-0.951921	0.279483	-3.40601	0.000659186	0.00710191	39.9603	47.0308	57.3334	94.0961	102.388	82.06	Tubb5	tubulin, beta 5 class I [Source:MGI Symbol;Acc:MGI:107812]
ENSMUSG00000040010	72.958	-0.949014	0.306248	-3.09884	0.0019428	0.0175559	47.0961	31.8149	70.9124	107.707	75.444	104.773	Slc7a5	solute carrier family 7 (cationic amino acid transporter, y+ system), member 5 [Source:MGI Symbol;Acc:MGI:1298205]
ENSMUSG00000025579	60.6366	-0.943855	0.316354	-2.98355	0.00284929	0.0234938	32.8245	35.9647	55.8246	65.0979	94.9786	79.1293	Gaa	glucosidase, alpha, acid [Source:MGI Symbol;Acc:MGI:95609]
ENSMUSG00000020964	72.0523	-0.941058	0.335868	-2.80187	0.00508081	0.0370173	79.9206	33.1982	34.7018	74.5667	87.5689	122.357	Sel1l	sel-1 suppressor of lin-12-like (C. elegans) [Source:MGI Symbol;Acc:MGI:1329016]
ENSMUSG00000030510	168.694	-0.93906	0.19531	-4.80805	1.52E-06	3.12E-05	139.861	117.577	89.0177	221.925	194.672	249.111	Cers3	ceramide synthase 3 [Source:MGI Symbol;Acc:MGI:2681008]
ENSMUSG00000033184	62.855	-0.936169	0.287887	-3.25186	0.00114652	0.0113173	41.3874	42.881	45.2632	89.3617	75.444	82.7927	Tmed7	transmembrane p24 trafficking protein 7 [Source:MGI Symbol;Acc:MGI:1913926]
ENSMUSG00000028757	278.397	-0.932826	0.189151	-4.93164	8.15E-07	1.73E-05	199.801	207.489	165.965	257.433	367.116	472.578	Ddost	dolichyl-di-phosphooligosaccharide-protein glycotransferase [Source:MGI Symbol;Acc:MGI:1194508]
ENSMUSG00000033845	72.0447	-0.928904	0.297539	-3.12196	0.00179651	0.0163466	45.6689	65.0132	37.7194	82.2601	82.1801	119.427	Mrpl15	mitochondrial ribosomal protein L15 [Source:MGI Symbol;Acc:MGI:1351639]
ENSMUSG00000004207	380.624	-0.926944	0.127499	-7.27018	3.59E-13	1.65E-11	269.732	244.837	273.088	544.455	435.824	515.806	Psap	prosaposin [Source:MGI Symbol;Acc:MGI:97783]
ENSMUSG00000073077	55.7241	-0.925162	0.333851	-2.77118	0.00558536	0.0397813	38.5331	34.5815	42.2457	56.2209	99.0202	63.743	Cfap47	cilia and flagella associated protein 47 [Source:MGI Symbol;Acc:MGI:3781475]
ENSMUSG00000010095	154.773	-0.923474	0.20919	-4.41452	1.01E-05	0.000180646	138.434	107.894	73.9299	221.333	189.957	197.091	Slc3a2	solute carrier family 3 (activators of dibasic and neutral amino acid transport), member 2 [Source:MGI Symbol;Acc:MGI:96955]
ENSMUSG00000046324	58.7305	-0.918896	0.304915	-3.01361	0.00258159	0.0217422	41.3874	47.0308	33.193	67.4651	76.1176	87.1888	Ermp1	endoplasmic reticulum metallopeptidase 1 [Source:MGI Symbol;Acc:MGI:106250]
ENSMUSG00000022210	65.1262	-0.913156	0.296263	-3.08225	0.00205445	0.0182319	35.6788	47.0308	52.8071	79.3011	74.0968	101.842	Dhrs4	dehydrogenase/reductase 4 [Source:MGI Symbol;Acc:MGI:90169]
ENSMUSG00000021518	67.6244	-0.908015	0.27629	-3.28645	0.00101458	0.0103106	41.3874	48.4141	51.2983	86.4027	89.5897	88.6541	Ptdss1	phosphatidylserine synthase 1 [Source:MGI Symbol;Acc:MGI:1276575]
ENSMUSG00000027404	66.0309	-0.904357	0.31743	-2.84899	0.00438579	0.0331441	39.9603	30.4317	67.8948	71.0159	99.6938	87.1888	Snrpb	small nuclear ribonucleoprotein B [Source:MGI Symbol;Acc:MGI:98342]
ENSMUSG00000024270	143.21	-0.901303	0.241477	-3.73246	0.00018962	0.00243267	87.0563	142.476	69.4036	188.784	149.541	222.002	Slc39a6	solute carrier family 39 (metal ion transporter), member 6 [Source:MGI Symbol;Acc:MGI:2147279]
ENSMUSG00000020712	471.772	-0.891813	0.105592	-8.44587	3.02E-17	1.93E-15	309.692	355.497	325.895	624.94	603.552	611.054	Tcam1	testicular cell adhesion molecule 1 [Source:MGI Symbol;Acc:MGI:1923120]
ENSMUSG00000030016	140.657	-0.889589	0.229058	-3.88368	0.000102887	0.00143107	85.6292	128.643	81.4738	229.618	160.318	158.259	Zfp638	zinc finger protein 638 [Source:MGI Symbol;Acc:MGI:1203484]
ENSMUSG00000038264	65.5368	-0.88796	0.2915	-3.04617	0.00231776	0.0199889	54.2318	40.1145	43.7545	100.606	76.1176	78.3966	Sema7a	sema domain, immunoglobulin domain (Ig), and GPI membrane anchor, (semaphorin) 7A [Source:MGI Symbol;Acc:MGI:1306826]
ENSMUSG00000078517	60.2089	-0.883045	0.303688	-2.90773	0.00364057	0.0284108	31.3974	42.881	52.8071	70.4241	79.4856	84.2581	Emc1	ER membrane protein complex subunit 1 [Source:MGI Symbol;Acc:MGI:2443696]
ENSMUSG00000021178	86.8557	-0.871617	0.309954	-2.81208	0.00492219	0.0361165	92.765	62.2466	28.6667	95.2797	112.492	129.684	Psmc1	protease (prosome, macropain) 26S subunit, ATPase 1 [Source:MGI Symbol;Acc:MGI:106054]
ENSMUSG00000020483	636.714	-0.870646	0.0966494	-9.00829	2.09E-19	1.53E-17	463.825	421.894	464.702	755.728	839.314	874.818	Dynll2	dynein light chain LC8-type 2 [Source:MGI Symbol;Acc:MGI:1915347]
ENSMUSG00000024084	79.9233	-0.869799	0.281467	-3.09023	0.00200003	0.0179222	47.0961	62.2466	60.351	99.4223	132.027	78.3966	Qpct	glutaminyl-peptide cyclotransferase (glutaminyl cyclase) [Source:MGI Symbol;Acc:MGI:1917786]
ENSMUSG00000025026	119.332	-0.864497	0.275557	-3.13728	0.00170524	0.0156368	98.4736	45.6475	110.141	163.928	113.166	184.635	Add3	adducin 3 [Source:MGI Symbol;Acc:MGI:1351615]
ENSMUSG00000015090	84.0923	-0.863446	0.274461	-3.14597	0.00165539	0.0153457	44.2417	62.2466	72.4212	83.4437	120.576	121.625	Ptgds	prostaglandin D2 synthase (brain) [Source:MGI Symbol;Acc:MGI:99261]
ENSMUSG00000053898	88.2983	-0.86318	0.24555	-3.51529	0.000439279	0.00506888	71.3577	65.0132	51.2983	108.299	115.86	117.961	Ech1	enoyl coenzyme A hydratase 1, peroxisomal [Source:MGI Symbol;Acc:MGI:1858208]
ENSMUSG00000003402	119.464	-0.863133	0.22782	-3.78866	0.00015146	0.0019958	77.0663	74.696	102.597	124.278	171.096	167.051	Prkcsh	protein kinase C substrate 80K-H [Source:MGI Symbol;Acc:MGI:107877]
ENSMUSG00000031781	77.4823	-0.859835	0.298576	-2.87979	0.00397946	0.0306129	82.7749	40.1145	42.2457	110.666	82.8537	106.238	Ciapin1	cytokine induced apoptosis inhibitor 1 [Source:MGI Symbol;Acc:MGI:1922083]
ENSMUSG00000017195	62.9394	-0.857676	0.311672	-2.75185	0.00592592	0.0417747	37.106	41.4978	55.8246	85.8109	59.951	97.4463	Zpbp2	zona pellucida binding protein 2 [Source:MGI Symbol;Acc:MGI:1916626]
ENSMUSG00000022575	61.3529	-0.855479	0.306698	-2.78932	0.00528189	0.038139	39.9603	45.6475	45.2632	59.1799	91.6106	86.4561	Gsdmd	gasdermin D [Source:MGI Symbol;Acc:MGI:1916396]
ENSMUSG00000030275	115.822	-0.852629	0.216362	-3.94075	8.12E-05	0.00117121	75.6391	78.8457	93.544	158.01	156.277	132.615	Etnk1	ethanolamine kinase 1 [Source:MGI Symbol;Acc:MGI:1922570]
ENSMUSG00000032667	61.7338	-0.84768	0.30771	-2.7548	0.0058728	0.041471	29.9702	53.9471	48.2808	75.1585	70.7287	92.3175	Pon2	paraoxonase 2 [Source:MGI Symbol;Acc:MGI:106687]
ENSMUSG00000040260	117.005	-0.846345	0.217521	-3.89086	9.99E-05	0.00140015	77.0663	78.8457	95.0528	131.379	164.36	155.328	Daam2	dishevelled associated activator of morphogenesis 2 [Source:MGI Symbol;Acc:MGI:1923691]
ENSMUSG00000028943	196.843	-0.842737	0.174429	-4.8314	1.36E-06	2.79E-05	151.278	114.81	156.913	224.292	271.464	262.299	Espn	espin [Source:MGI Symbol;Acc:MGI:1861630]
ENSMUSG00000039198	122.626	-0.840413	0.224654	-3.74093	0.000183343	0.00236096	67.0762	116.194	79.965	149.133	155.603	167.783	Ptchd3	patched domain containing 3 [Source:MGI Symbol;Acc:MGI:1921925]
ENSMUSG00000025081	208.069	-0.839303	0.178294	-4.7074	2.51E-06	4.91E-05	134.152	136.943	176.527	227.251	260.686	312.854	Tdrd1	tudor domain containing 1 [Source:MGI Symbol;Acc:MGI:1933218]
ENSMUSG00000031703	77.6196	-0.838083	0.311824	-2.68768	0.00719508	0.048726	44.2417	35.9647	87.5089	120.727	92.2842	84.9907	Itfg1	integrin alpha FG-GAP repeat containing 1 [Source:MGI Symbol;Acc:MGI:106419]
ENSMUSG00000019948	59.562	-0.838061	0.293634	-2.8541	0.0043159	0.032804	42.8146	40.1145	45.2632	69.8323	79.4856	79.862	Actr6	ARP6 actin-related protein 6 [Source:MGI Symbol;Acc:MGI:1914269]
ENSMUSG00000025001	61.391	-0.833912	0.30966	-2.69299	0.00708134	0.0481247	47.0961	42.881	42.2457	58.5881	97.673	79.862	Hells	helicase, lymphoid specific [Source:MGI Symbol;Acc:MGI:106209]
ENSMUSG00000053644	74.1399	-0.820952	0.282339	-2.90768	0.00364119	0.0284108	45.6689	41.4978	73.9299	85.8109	99.0202	98.9116	Aldh7a1	aldehyde dehydrogenase family 7, member A1 [Source:MGI Symbol;Acc:MGI:108186]
ENSMUSG00000027649	131.147	-0.80821	0.21718	-3.72139	0.000198132	0.00251841	81.3477	127.26	76.9475	171.03	160.318	169.981	Ctnnbl1	catenin, beta like 1 [Source:MGI Symbol;Acc:MGI:1913892]
ENSMUSG00000052727	86.5619	-0.803488	0.249583	-3.21932	0.00128496	0.0124023	69.9305	66.3964	52.8071	118.952	113.84	97.4463	Map1b	microtubule-associated protein 1B [Source:MGI Symbol;Acc:MGI:1306778]
ENSMUSG00000019818	128.551	-0.801785	0.253083	-3.16808	0.00153452	0.0144398	74.212	135.559	70.9124	179.907	124.617	186.1	Cd164	CD164 antigen [Source:MGI Symbol;Acc:MGI:1859568]
ENSMUSG00000032281	149.455	-0.792609	0.20928	-3.78732	0.000152281	0.00200024	85.6292	142.476	99.5791	179.907	174.464	214.675	Acsbg1	acyl-CoA synthetase bubblegum family member 1 [Source:MGI Symbol;Acc:MGI:2385656]
ENSMUSG00000029064	72.5008	-0.789398	0.278135	-2.83818	0.00453712	0.0339496	45.6689	60.8634	52.8071	81.6683	110.472	83.5254	Gnb1	guanine nucleotide binding protein (G protein), beta 1 [Source:MGI Symbol;Acc:MGI:95781]
ENSMUSG00000024843	98.5826	-0.786565	0.229815	-3.4226	0.000620247	0.00675163	82.7749	67.7797	66.3861	120.135	123.27	131.149	Chka	choline kinase alpha [Source:MGI Symbol;Acc:MGI:107760]
ENSMUSG00000006333	182.11	-0.785253	0.174964	-4.48809	7.19E-06	0.000131649	152.705	117.577	131.263	251.515	225.658	213.942	Rps9	ribosomal protein S9 [Source:MGI Symbol;Acc:MGI:1924096]
ENSMUSG00000024493	82.3699	-0.777202	0.254758	-3.05074	0.00228279	0.0197135	61.3676	69.1629	51.2983	102.381	94.9786	115.031	Lars1	leucyl-tRNA synthetase 1 [Source:MGI Symbol;Acc:MGI:1913808]
ENSMUSG00000021427	99.3878	-0.777003	0.23346	-3.32821	0.000874062	0.00908365	75.6391	73.3127	70.9124	130.788	139.437	106.238	Ssr1	signal sequence receptor, alpha [Source:MGI Symbol;Acc:MGI:105082]
ENSMUSG00000049396	91.1367	-0.773469	0.269695	-2.86793	0.00413161	0.0315776	45.6689	74.696	81.4738	93.5043	140.11	111.367	Gemin4	gem nuclear organelle associated protein 4 [Source:MGI Symbol;Acc:MGI:2449313]
ENSMUSG00000020705	118.358	-0.771584	0.215963	-3.57275	0.000353246	0.00417527	95.6193	74.696	92.0352	143.215	136.069	168.516	Ddx42	DEAD box helicase 42 [Source:MGI Symbol;Acc:MGI:1919297]
ENSMUSG00000024091	194.138	-0.769677	0.176476	-4.36137	1.29E-05	0.000223869	166.977	143.859	119.193	226.067	231.047	277.685	Vapa	vesicle-associated membrane protein, associated protein A [Source:MGI Symbol;Acc:MGI:1353561]
ENSMUSG00000102483	79.5129	-0.765075	0.28502	-2.68429	0.0072685	0.0489954	87.0563	42.881	46.772	99.4223	106.43	94.5156	Catspere1	cation channel sperm associated auxiliary subunit epsilon 1 [Source:MGI Symbol;Acc:MGI:3647531]
ENSMUSG00000029235	812.873	-0.761729	0.0835887	-9.11282	8.03E-20	5.92E-18	580.851	579.585	650.282	1075.3	988.182	1003.04	Pdcl2	phosducin-like 2 [Source:MGI Symbol;Acc:MGI:1890655]
ENSMUSG00000025652	94.1576	-0.756309	0.256516	-2.94839	0.00319437	0.025698	88.4835	77.4625	43.7545	120.135	117.881	117.229	Tmem89	transmembrane protein 89 [Source:MGI Symbol;Acc:MGI:1916634]
ENSMUSG00000020430	84.3639	-0.755924	0.250479	-3.01791	0.00254525	0.0215239	57.0861	69.1629	61.8597	94.6879	117.881	105.506	Pes1	pescadillo ribosomal biogenesis factor 1 [Source:MGI Symbol;Acc:MGI:1890613]
ENSMUSG00000040688	108.505	-0.754811	0.244642	-3.08537	0.00203301	0.0181783	75.6391	98.2114	67.8948	104.748	161.666	142.872	Tbl3	transducin (beta)-like 3 [Source:MGI Symbol;Acc:MGI:2384863]
ENSMUSG00000022800	231.843	-0.754739	0.154103	-4.89764	9.70E-07	2.03E-05	152.705	186.74	178.035	291.165	268.096	314.319	Fyttd1	forty-two-three domain containing 1 [Source:MGI Symbol;Acc:MGI:1917955]
ENSMUSG00000029156	131.235	-0.753445	0.220682	-3.41417	0.000639768	0.00693669	69.9305	120.343	102.597	144.991	166.381	183.17	Sgcb	sarcoglycan, beta (dystrophin-associated glycoprotein) [Source:MGI Symbol;Acc:MGI:1346523]
ENSMUSG00000031751	154.193	-0.744843	0.241874	-3.07947	0.0020737	0.0183633	109.891	170.141	64.8773	179.315	198.714	202.219	Amfr	autocrine motility factor receptor [Source:MGI Symbol;Acc:MGI:1345634]
ENSMUSG00000033644	245.379	-0.744796	0.170306	-4.37328	1.22E-05	0.000212885	142.715	178.44	229.334	266.901	327.373	327.507	Piwil2	piwi-like RNA-mediated gene silencing 2 [Source:MGI Symbol;Acc:MGI:1930036]
ENSMUSG00000033732	93.0615	-0.743789	0.263936	-2.81807	0.00483131	0.0355127	57.0861	52.5638	99.5791	107.707	129.333	112.1	Sf3b3	splicing factor 3b, subunit 3 [Source:MGI Symbol;Acc:MGI:1289341]
ENSMUSG00000006932	116.739	-0.740952	0.21297	-3.47913	0.000503037	0.00569328	77.0663	85.762	99.5791	150.909	134.721	152.397	Ctnnb1	catenin beta 1 [Source:MGI Symbol;Acc:MGI:88276]
ENSMUSG00000024308	102.431	-0.738675	0.255089	-2.89575	0.00378256	0.0293441	72.7848	76.0792	81.4738	107.707	171.77	104.773	Tapbp	TAP binding protein [Source:MGI Symbol;Acc:MGI:1201689]
ENSMUSG00000003458	151.747	-0.73241	0.210682	-3.47637	0.000508252	0.00572875	137.007	106.511	98.0703	158.01	177.159	233.725	Ncstn	nicastrin [Source:MGI Symbol;Acc:MGI:1891700]
ENSMUSG00000028779	129.855	-0.731791	0.21392	-3.42087	0.000624216	0.00678588	81.3477	112.044	99.5791	189.376	141.457	155.328	Pef1	penta-EF hand domain containing 1 [Source:MGI Symbol;Acc:MGI:1915148]
ENSMUSG00000078346	152.096	-0.729662	0.257386	-2.83489	0.00458415	0.0340596	105.609	167.374	69.4036	139.073	205.45	225.665	H2al1n	H2A histone family member L1N [Source:MGI Symbol;Acc:MGI:3643774]
ENSMUSG00000025982	404.312	-0.723013	0.127515	-5.67004	1.43E-08	3.96E-07	269.732	276.652	369.65	499.479	476.24	534.123	Sf3b1	splicing factor 3b, subunit 1 [Source:MGI Symbol;Acc:MGI:1932339]
ENSMUSG00000031161	95.0417	-0.711745	0.232504	-3.06121	0.00220446	0.0192529	65.649	67.7797	82.9826	120.135	117.208	116.496	Hdac6	histone deacetylase 6 [Source:MGI Symbol;Acc:MGI:1333752]
ENSMUSG00000022756	105.706	-0.707039	0.226424	-3.12263	0.00179243	0.01634	78.4934	92.6783	69.4036	118.36	144.152	131.149	Slc7a4	solute carrier family 7 (cationic amino acid transporter, y+ system), member 4 [Source:MGI Symbol;Acc:MGI:2146512]
ENSMUSG00000024352	407.461	-0.706764	0.11166	-6.3296	2.46E-10	8.99E-09	299.702	312.616	316.843	519.6	514.636	481.37	Spata24	spermatogenesis associated 24 [Source:MGI Symbol;Acc:MGI:1918492]
ENSMUSG00000023944	272.143	-0.703795	0.141823	-4.96249	6.96E-07	1.51E-05	221.209	219.938	179.544	330.816	359.706	321.646	Hsp90ab1	heat shock protein 90 alpha (cytosolic), class B member 1 [Source:MGI Symbol;Acc:MGI:96247]
ENSMUSG00000003153	1207.12	-0.701955	0.0721346	-9.73118	2.22E-22	1.93E-20	961.901	882.519	912.808	1423.28	1608.57	1453.63	Slc2a3	solute carrier family 2 (facilitated glucose transporter), member 3 [Source:MGI Symbol;Acc:MGI:95757]
ENSMUSG00000024382	118.248	-0.699778	0.24577	-2.84728	0.00440939	0.0332091	81.3477	112.044	76.9475	163.337	171.77	104.04	Ercc3	excision repair cross-complementing rodent repair deficiency, complementation group 3 [Source:MGI Symbol;Acc:MGI:95414]
ENSMUSG00000032458	122.898	-0.698585	0.220064	-3.17446	0.00150116	0.0141906	78.4934	112.044	90.5265	151.501	175.138	129.684	Copb2	COPI coat complex subunit beta 2 [Source:MGI Symbol;Acc:MGI:1354962]
ENSMUSG00000021810	101.211	-0.697888	0.233768	-2.98539	0.0028322	0.0234231	95.6193	65.0132	70.9124	117.176	134.721	123.823	Ecd	ecdysoneless cell cycle regulator [Source:MGI Symbol;Acc:MGI:1917851]
ENSMUSG00000093668	170.527	-0.697438	0.218265	-3.19537	0.0013965	0.0133078	92.765	167.374	129.755	208.313	167.055	257.903	Pou5f2	POU domain class 5, transcription factor 2 [Source:MGI Symbol;Acc:MGI:1922757]
ENSMUSG00000047014	212.885	-0.693666	0.161058	-4.30693	1.66E-05	0.000281372	151.278	186.74	149.369	243.229	266.075	280.616	Catsperb	cation channel sperm associated auxiliary subunit beta [Source:MGI Symbol;Acc:MGI:2443988]
ENSMUSG00000025151	302.406	-0.68807	0.16024	-4.294	1.75E-05	0.000294677	195.52	289.101	209.72	400.056	311.206	408.835	Maged1	MAGE family member D1 [Source:MGI Symbol;Acc:MGI:1930187]
ENSMUSG00000024758	143.01	-0.6762	0.204159	-3.31213	0.000925888	0.00956543	107.036	138.326	84.4914	187.009	169.749	171.447	Rtn3	reticulon 3 [Source:MGI Symbol;Acc:MGI:1339970]
ENSMUSG00000019470	176.93	-0.675299	0.196784	-3.43168	0.000599858	0.00659923	134.152	157.691	116.176	168.663	243.846	241.051	Xab2	XPA binding protein 2 [Source:MGI Symbol;Acc:MGI:1914689]
ENSMUSG00000001228	109.879	-0.672773	0.246126	-2.73346	0.00626735	0.0436233	68.5034	118.96	66.3861	152.092	127.312	126.021	Uhrf1	ubiquitin-like, containing PHD and RING finger domains, 1 [Source:MGI Symbol;Acc:MGI:1338889]
ENSMUSG00000031996	451.594	-0.666132	0.119989	-5.55161	2.83E-08	7.62E-07	385.331	302.934	359.088	518.416	525.413	618.381	Aplp2	amyloid beta precursor-like protein 2 [Source:MGI Symbol;Acc:MGI:88047]
ENSMUSG00000025204	169.983	-0.664445	0.192767	-3.44688	0.0005671	0.00631453	169.831	99.5946	125.228	205.354	208.145	211.744	Ndufb8	NADH:ubiquinone oxidoreductase subunit B8 [Source:MGI Symbol;Acc:MGI:1914514]
ENSMUSG00000027447	316.386	-0.661137	0.132585	-4.98652	6.15E-07	1.36E-05	268.305	247.603	218.772	356.263	401.47	405.904	Cst3	cystatin C [Source:MGI Symbol;Acc:MGI:102519]
ENSMUSG00000021748	114.215	-0.661038	0.232633	-2.84156	0.00448941	0.0337195	81.3477	103.744	79.965	130.788	116.534	172.912	Pdhb	pyruvate dehydrogenase (lipoamide) beta [Source:MGI Symbol;Acc:MGI:1915513]
ENSMUSG00000061086	238.655	-0.659858	0.146522	-4.50349	6.68E-06	0.00012328	189.811	181.207	184.07	304.185	270.79	301.864	Myl4	myosin, light polypeptide 4 [Source:MGI Symbol;Acc:MGI:97267]
ENSMUSG00000000168	173.146	-0.656675	0.177349	-3.70273	0.000213289	0.00269448	142.715	138.326	122.211	222.517	227.006	186.1	Dlat	dihydrolipoamide S-acetyltransferase [Source:MGI Symbol;Acc:MGI:2385311]
ENSMUSG00000027445	214.448	-0.644121	0.164442	-3.91701	8.97E-05	0.00127712	168.404	168.758	164.456	239.679	239.13	306.26	Cst9	cystatin 9 [Source:MGI Symbol;Acc:MGI:1340053]
ENSMUSG00000017707	354.092	-0.64287	0.12103	-5.31168	1.09E-07	2.72E-06	254.033	273.885	301.755	423.136	427.74	444.003	Serinc3	serine incorporator 3 [Source:MGI Symbol;Acc:MGI:1349457]
ENSMUSG00000028134	134.2	-0.638614	0.205151	-3.1129	0.00185261	0.0168105	85.6292	113.427	116.176	184.05	154.256	151.664	Ptbp2	polypyrimidine tract binding protein 2 [Source:MGI Symbol;Acc:MGI:1860489]
ENSMUSG00000032777	428.237	-0.63598	0.117207	-5.42611	5.76E-08	1.48E-06	309.692	372.097	324.386	562.209	524.066	476.974	Gtf3c1	general transcription factor III C 1 [Source:MGI Symbol;Acc:MGI:107887]
ENSMUSG00000049902	99.9514	-0.634433	0.229826	-2.7605	0.00577136	0.0408945	85.6292	65.0132	84.4914	115.993	131.353	117.229	4921517D22Rik	RIKEN cDNA 4921517D22 gene [Source:MGI Symbol;Acc:MGI:1918150]
ENSMUSG00000001016	143.145	-0.632864	0.195586	-3.23573	0.0012133	0.0118072	117.027	127.26	92.0352	166.887	188.61	167.051	Ilf2	interleukin enhancer binding factor 2 [Source:MGI Symbol;Acc:MGI:1915031]
ENSMUSG00000026463	216.062	-0.62971	0.168398	-3.73942	0.000184448	0.00237	129.871	175.674	203.685	258.616	255.971	272.556	Atp2b4	ATPase, Ca++ transporting, plasma membrane 4 [Source:MGI Symbol;Acc:MGI:88111]
ENSMUSG00000027248	588.083	-0.626908	0.214257	-2.92597	0.00343386	0.027227	342.517	580.969	463.194	716.669	734.232	690.916	Pdia3	protein disulfide isomerase associated 3 [Source:MGI Symbol;Acc:MGI:95834]
ENSMUSG00000000339	136.895	-0.626098	0.218076	-2.87101	0.0040916	0.0313298	105.609	120.343	96.5616	161.561	130.68	206.615	Rtca	RNA 3'-terminal phosphate cyclase [Source:MGI Symbol;Acc:MGI:1913618]
ENSMUSG00000026554	170.129	-0.624795	0.187713	-3.32845	0.000873301	0.00908365	129.871	112.044	159.93	181.091	229.026	208.813	Dcaf8	DDB1 and CUL4 associated factor 8 [Source:MGI Symbol;Acc:MGI:91860]
ENSMUSG00000016534	148.846	-0.623583	0.225314	-2.76761	0.00564684	0.0401845	146.997	69.1629	135.79	175.764	186.589	178.774	Lamp2	lysosomal-associated membrane protein 2 [Source:MGI Symbol;Acc:MGI:96748]
ENSMUSG00000026568	222.658	-0.623477	0.152313	-4.09339	4.25E-05	0.00066395	158.414	193.656	173.509	261.575	275.505	273.289	Mpc2	mitochondrial pyruvate carrier 2 [Source:MGI Symbol;Acc:MGI:1917706]
ENSMUSG00000028790	127.382	-0.618592	0.208138	-2.97202	0.00295845	0.0241768	87.0563	92.6783	122.211	163.928	156.277	142.14	Khdrbs1	KH domain containing, RNA binding, signal transduction associated 1 [Source:MGI Symbol;Acc:MGI:893579]
ENSMUSG00000032218	123.89	-0.612828	0.225751	-2.71462	0.00663516	0.0456758	119.881	80.229	93.544	126.645	142.805	180.239	Ccnb2	cyclin B2 [Source:MGI Symbol;Acc:MGI:88311]
ENSMUSG00000027180	220.527	-0.612659	0.16716	-3.6651	0.000247243	0.00305796	164.123	145.242	214.246	242.638	274.832	282.081	Fbxo3	F-box protein 3 [Source:MGI Symbol;Acc:MGI:1929084]
ENSMUSG00000028556	131.573	-0.612114	0.204939	-2.98682	0.00281899	0.0233734	109.891	118.96	82.9826	165.112	146.173	166.318	Dock7	dedicator of cytokinesis 7 [Source:MGI Symbol;Acc:MGI:1914549]
ENSMUSG00000059208	330.494	-0.604818	0.146423	-4.13061	3.62E-05	0.000572652	321.109	207.489	258	367.507	398.775	430.082	Hnrnpm	heterogeneous nuclear ribonucleoprotein M [Source:MGI Symbol;Acc:MGI:1926465]
ENSMUSG00000026553	180.519	-0.604395	0.167114	-3.61666	0.000298429	0.00359944	151.278	138.326	140.316	229.618	216.228	207.348	Copa	coatomer protein complex subunit alpha [Source:MGI Symbol;Acc:MGI:1334462]
ENSMUSG00000030795	165.46	-0.594008	0.195532	-3.0379	0.00238233	0.0203967	102.755	127.26	165.965	184.05	222.964	189.764	Fus	fused in sarcoma [Source:MGI Symbol;Acc:MGI:1353633]
ENSMUSG00000021577	156.99	-0.59262	0.217431	-2.72555	0.00641939	0.0444569	98.4736	178.44	98.0703	181.091	203.429	182.437	Sdha	succinate dehydrogenase complex, subunit A, flavoprotein (Fp) [Source:MGI Symbol;Acc:MGI:1914195]
ENSMUSG00000042554	968.288	-0.592304	0.0753554	-7.86015	3.84E-15	2.17E-13	784.934	722.061	810.212	1140.99	1140.42	1211.12	Zp3r	zona pellucida 3 receptor [Source:MGI Symbol;Acc:MGI:104965]
ENSMUSG00000041791	728.621	-0.591076	0.0980074	-6.03094	1.63E-09	5.14E-08	620.812	630.766	491.86	938.002	827.189	863.096	Capza3	capping actin protein of muscle Z-line subunit alpha 3 [Source:MGI Symbol;Acc:MGI:106221]
ENSMUSG00000055065	215.673	-0.589994	0.158093	-3.73194	0.000190011	0.00243391	156.987	177.057	182.562	268.085	232.394	276.953	Ddx17	DEAD box helicase 17 [Source:MGI Symbol;Acc:MGI:1914290]
ENSMUSG00000036822	156.035	-0.5899	0.202305	-2.91589	0.00354675	0.0279345	111.318	116.194	146.351	188.784	151.562	222.002	Topors	topoisomerase I binding, arginine/serine-rich [Source:MGI Symbol;Acc:MGI:2146189]
ENSMUSG00000039345	211.339	-0.587975	0.187302	-3.13918	0.00169419	0.0155873	215.5	128.643	162.948	297.083	233.068	230.794	Mettl22	methyltransferase 22, Kin17 lysine [Source:MGI Symbol;Acc:MGI:2384301]
ENSMUSG00000041459	153.748	-0.584733	0.187118	-3.12495	0.00177837	0.0162712	129.871	103.744	135.79	182.866	198.04	172.179	Tardbp	TAR DNA binding protein [Source:MGI Symbol;Acc:MGI:2387629]
ENSMUSG00000039509	149.063	-0.581211	0.184757	-3.14582	0.0016562	0.0153457	122.735	116.194	119.193	165.112	179.179	191.962	Nup133	nucleoporin 133 [Source:MGI Symbol;Acc:MGI:2442620]
ENSMUSG00000046615	149.697	-0.570252	0.196589	-2.90073	0.00372291	0.0289357	108.464	124.493	128.246	147.358	193.999	195.625	Actrt1	actin-related protein T1 [Source:MGI Symbol;Acc:MGI:1920610]
ENSMUSG00000074764	149.676	-0.569274	0.191041	-2.97985	0.00288385	0.0236607	108.464	116.194	137.298	181.091	196.02	158.991	Sel1l2	sel-1 suppressor of lin-12-like 2 (C. elegans) [Source:MGI Symbol;Acc:MGI:2684964]
ENSMUSG00000003814	898.375	-0.564071	0.0869823	-6.4849	8.88E-11	3.51E-09	676.471	818.889	678.948	1098.38	1118.19	999.374	Calr	calreticulin [Source:MGI Symbol;Acc:MGI:88252]
ENSMUSG00000030654	248.386	-0.562877	0.166813	-3.3743	0.000740043	0.00789953	214.073	145.242	242.913	281.105	297.061	309.923	Arl6ip1	ADP-ribosylation factor-like 6 interacting protein 1 [Source:MGI Symbol;Acc:MGI:1858943]
ENSMUSG00000095040	202.244	-0.559549	0.174502	-3.20654	0.00134342	0.0128614	145.57	172.907	172	214.823	287.63	220.536	1700001J03Rik	RIKEN cDNA 1700001J03 gene [Source:MGI Symbol;Acc:MGI:1916532]
ENSMUSG00000030978	184.618	-0.550398	0.180747	-3.04512	0.00232586	0.0200018	168.404	167.374	113.158	213.64	237.783	207.348	Rrm1	ribonucleotide reductase M1 [Source:MGI Symbol;Acc:MGI:98180]
ENSMUSG00000020929	144.587	-0.548917	0.189712	-2.89342	0.00381068	0.0294899	109.891	120.343	122.211	178.723	183.221	153.13	Eftud2	elongation factor Tu GTP binding domain containing 2 [Source:MGI Symbol;Acc:MGI:1336880]
ENSMUSG00000004980	391.895	-0.546972	0.115121	-4.75126	2.02E-06	4.01E-05	328.245	308.467	318.351	434.381	468.83	493.093	Hnrnpa2b1	heterogeneous nuclear ribonucleoprotein A2/B1 [Source:MGI Symbol;Acc:MGI:104819]
ENSMUSG00000020571	508.57	-0.544052	0.108175	-5.02937	4.92E-07	1.10E-05	479.523	383.163	378.702	621.389	598.837	589.806	Pdia6	protein disulfide isomerase associated 6 [Source:MGI Symbol;Acc:MGI:1919103]
ENSMUSG00000040325	1217.72	-0.542958	0.0705036	-7.70114	1.35E-14	7.01E-13	1014.71	943.382	1016.91	1462.93	1521	1347.4	Dcaf1	DDB1 and CUL4 associated factor 1 [Source:MGI Symbol;Acc:MGI:2445220]
ENSMUSG00000019795	2149.82	-0.542312	0.052068	-10.4155	2.11E-25	2.12E-23	1674.05	1742.91	1834.67	2472.54	2592.04	2582.69	Pcmt1	protein-L-isoaspartate (D-aspartate) O-methyltransferase 1 [Source:MGI Symbol;Acc:MGI:97502]
ENSMUSG00000047104	226.723	-0.536725	0.171895	-3.12241	0.0017938	0.01634	162.695	237.92	153.895	265.718	290.998	249.111	Pbp2	phosphatidylethanolamine binding protein 2 [Source:MGI Symbol;Acc:MGI:1923650]
ENSMUSG00000020193	314.358	-0.53562	0.155521	-3.44403	0.000573117	0.00636467	239.762	304.317	224.807	300.634	412.921	403.706	Zpbp	zona pellucida binding protein [Source:MGI Symbol;Acc:MGI:1855701]
ENSMUSG00000032968	205.027	-0.52896	0.179822	-2.94157	0.00326555	0.0262196	201.229	182.59	119.193	253.29	227.679	246.18	Inha	inhibin alpha [Source:MGI Symbol;Acc:MGI:96569]
ENSMUSG00000027823	395.925	-0.527248	0.113553	-4.64318	3.43E-06	6.61E-05	335.381	305.7	331.93	445.625	467.483	489.429	Gmps	guanine monophosphate synthetase [Source:MGI Symbol;Acc:MGI:2448526]
ENSMUSG00000042708	829.127	-0.526586	0.0844784	-6.23338	4.56E-10	1.60E-08	655.063	693.013	689.51	932.676	936.987	1067.51	Shcbp1l	Shc SH2-domain binding protein 1-like [Source:MGI Symbol;Acc:MGI:1919086]
ENSMUSG00000031631	210.074	-0.521018	0.162735	-3.20164	0.00136648	0.0130368	185.53	141.092	191.614	254.474	253.276	234.457	Cfap97	cilia and flagella associated protein 97 [Source:MGI Symbol;Acc:MGI:1914006]
ENSMUSG00000074127	514.275	-0.52097	0.101499	-5.13275	2.86E-07	6.59E-06	431	432.96	402.843	581.147	649.357	588.341	Cmtm2a	CKLF-like MARVEL transmembrane domain containing 2A [Source:MGI Symbol;Acc:MGI:2447160]
ENSMUSG00000042699	235.028	-0.520853	0.158621	-3.28364	0.00102477	0.0103885	188.384	177.057	214.246	305.368	236.436	288.675	Dhx9	DExH-box helicase 9 [Source:MGI Symbol;Acc:MGI:108177]
ENSMUSG00000022783	336.791	-0.518271	0.142866	-3.62767	0.000285986	0.00346453	242.616	308.467	279.123	376.976	347.581	465.984	Spag6l	sperm associated antigen 6-like [Source:MGI Symbol;Acc:MGI:1354388]
ENSMUSG00000026615	148.194	-0.518223	0.191614	-2.70452	0.00684033	0.0467451	124.162	114.81	126.737	164.52	201.409	157.526	Eprs1	glutamyl-prolyl-tRNA synthetase 1 [Source:MGI Symbol;Acc:MGI:97838]
ENSMUSG00000067377	703.234	-0.517932	0.090522	-5.72161	1.06E-08	2.98E-07	599.404	583.735	550.703	777.624	809.676	898.264	Tspan6	tetraspanin 6 [Source:MGI Symbol;Acc:MGI:1926264]
ENSMUSG00000021282	1815.65	-0.513995	0.0615049	-8.35698	6.43E-17	4.06E-15	1372.92	1558.93	1554.04	2036.38	2133.31	2238.33	Eif5	eukaryotic translation initiation factor 5 [Source:MGI Symbol;Acc:MGI:95309]
ENSMUSG00000047021	512.125	-0.513099	0.102678	-4.99715	5.82E-07	1.29E-05	468.106	406.678	390.773	596.534	590.08	620.579	Cfap65	cilia and flagella associated protein 65 [Source:MGI Symbol;Acc:MGI:2444274]
ENSMUSG00000031864	255.055	-0.511893	0.163903	-3.12316	0.00178923	0.0163344	188.384	247.603	194.632	337.326	245.867	316.517	Ints10	integrator complex subunit 10 [Source:MGI Symbol;Acc:MGI:1918135]
ENSMUSG00000035726	211.315	-0.511851	0.167039	-3.06427	0.00218204	0.0190773	194.093	165.991	162.948	280.513	252.603	211.744	Supt16	SPT16, facilitates chromatin remodeling subunit [Source:MGI Symbol;Acc:MGI:1890948]
ENSMUSG00000025289	507.825	-0.511833	0.105008	-4.87422	1.09E-06	2.28E-05	460.97	419.127	375.685	626.715	573.913	590.539	Prdx4	peroxiredoxin 4 [Source:MGI Symbol;Acc:MGI:1859815]
ENSMUSG00000051896	1194.04	-0.508585	0.0766354	-6.63642	3.21E-11	1.32E-09	1063.23	1042.98	849.44	1424.46	1387.63	1396.49	Spmip9	sperm microtubule inner protein 9 [Source:MGI Symbol;Acc:MGI:1921471]
ENSMUSG00000060499	308.23	-0.508115	0.127468	-3.98622	6.71E-05	0.000995137	254.033	258.669	250.457	340.285	375.199	370.735	Rpl10l	ribosomal protein L10-like [Source:MGI Symbol;Acc:MGI:3647985]
ENSMUSG00000028642	596.125	-0.505746	0.105201	-4.80744	1.53E-06	3.12E-05	423.864	492.44	562.773	703.649	738.273	655.747	Tmem269	transmembrane protein 269 [Source:MGI Symbol;Acc:MGI:1922430]
ENSMUSG00000017720	224.301	-0.502069	0.155812	-3.22228	0.00127176	0.0123036	181.248	175.674	200.667	280.513	276.179	231.526	Trp53tg5	transformation related protein 53 target 5 [Source:MGI Symbol;Acc:MGI:1920853]
ENSMUSG00000072770	620.583	-0.499538	0.104675	-4.77227	1.82E-06	3.64E-05	510.921	532.555	497.896	659.856	687.753	834.521	Acrbp	proacrosin binding protein [Source:MGI Symbol;Acc:MGI:1859515]
ENSMUSG00000020719	858.288	-0.498826	0.0863675	-5.77562	7.67E-09	2.21E-07	622.239	735.894	777.019	1049.85	989.529	975.195	Ddx5	DEAD box helicase 5 [Source:MGI Symbol;Acc:MGI:105037]
ENSMUSG00000025428	347.337	-0.497058	0.140591	-3.53548	0.000407036	0.00473001	353.934	260.053	250.457	444.441	401.47	373.666	Atp5f1a	ATP synthase F1 subunit alpha [Source:MGI Symbol;Acc:MGI:88115]
ENSMUSG00000037058	678.734	-0.49705	0.0952428	-5.21877	1.80E-07	4.35E-06	516.629	611.4	561.264	864.027	765.891	753.194	Paip2	polyadenylate-binding protein-interacting protein 2 [Source:MGI Symbol;Acc:MGI:1915119]
ENSMUSG00000020904	290.793	-0.490055	0.143117	-3.42415	0.000616735	0.00673113	266.878	195.039	264.036	321.939	341.519	355.349	Cfap52	cilia and flagella associated protein 52 [Source:MGI Symbol;Acc:MGI:1919110]
ENSMUSG00000020456	329.827	-0.48554	0.133045	-3.64946	0.000262796	0.0032214	241.189	282.185	301.755	421.953	351.623	380.26	Ogdh	oxoglutarate (alpha-ketoglutarate) dehydrogenase (lipoamide) [Source:MGI Symbol;Acc:MGI:1098267]
ENSMUSG00000009291	987.778	-0.484848	0.0763884	-6.34714	2.19E-10	8.10E-09	830.603	763.559	876.598	1152.23	1101.35	1202.33	Pttg1ip	pituitary tumor-transforming 1 interacting protein [Source:MGI Symbol;Acc:MGI:2652132]
ENSMUSG00000078652	269.965	-0.484429	0.137034	-3.5351	0.000407621	0.00473001	244.043	222.705	208.211	308.327	328.047	308.458	Psme3	proteaseome (prosome, macropain) activator subunit 3 (PA28 gamma, Ki) [Source:MGI Symbol;Acc:MGI:1096366]
ENSMUSG00000030968	521.642	-0.480382	0.116262	-4.1319	3.60E-05	0.000571111	448.126	356.881	502.422	571.678	600.857	649.886	Pdilt	protein disulfide isomerase-like, testis expressed [Source:MGI Symbol;Acc:MGI:1919080]
ENSMUSG00000025613	406.771	-0.477875	0.110578	-4.32161	1.55E-05	0.000264411	353.934	343.048	322.878	471.664	489.712	459.39	Cct8	chaperonin containing TCP1 subunit 8 [Source:MGI Symbol;Acc:MGI:107183]
ENSMUSG00000066643	457.21	-0.476207	0.127782	-3.72671	0.000193996	0.00247345	431	417.744	297.229	513.09	503.184	581.014	Wdr35	WD repeat domain 35 [Source:MGI Symbol;Acc:MGI:1921932]
ENSMUSG00000005881	333.302	-0.474417	0.122985	-3.85753	0.000114537	0.00157193	274.013	276.652	286.667	410.709	367.116	384.656	Ergic3	ERGIC and golgi 3 [Source:MGI Symbol;Acc:MGI:1913616]
ENSMUSG00000055643	212.092	-0.473048	0.167642	-2.82177	0.00477595	0.0351684	175.54	150.775	206.702	217.19	251.255	271.091	Ubqln5	ubiquilin 5 [Source:MGI Symbol;Acc:MGI:1918230]
ENSMUSG00000051956	1308.69	-0.472522	0.0738971	-6.39433	1.61E-10	6.11E-09	1195.95	1095.54	997.3	1591.94	1558.05	1413.34	Rnf133	ring finger protein 133 [Source:MGI Symbol;Acc:MGI:2677436]
ENSMUSG00000019732	942.329	-0.471914	0.0774309	-6.09464	1.10E-09	3.58E-08	734.984	802.29	831.335	1075.3	1057.56	1152.5	Calr3	calreticulin 3 [Source:MGI Symbol;Acc:MGI:1920566]
ENSMUSG00000029447	205.143	-0.470435	0.156426	-3.0074	0.00263495	0.0220791	165.55	182.59	167.474	225.476	238.457	251.309	Cct6a	chaperonin containing TCP1 subunit 6A [Source:MGI Symbol;Acc:MGI:107943]
ENSMUSG00000051695	180.724	-0.46533	0.168331	-2.76438	0.00570314	0.0405502	149.851	153.542	152.386	227.843	209.492	191.229	Pcbp1	poly(rC) binding protein 1 [Source:MGI Symbol;Acc:MGI:1345635]
ENSMUSG00000024740	476.774	-0.464876	0.121564	-3.82413	0.000131235	0.00176303	361.07	399.762	440.562	477.582	553.031	628.638	Ddb1	damage specific DNA binding protein 1 [Source:MGI Symbol;Acc:MGI:1202384]
ENSMUSG00000037737	463.828	-0.46367	0.114677	-4.04328	5.27E-05	0.000796125	396.749	359.647	413.404	526.701	485.671	600.797	Actrt3	actin related protein T3 [Source:MGI Symbol;Acc:MGI:1923902]
ENSMUSG00000007107	4854.42	-0.462882	0.0370517	-12.4929	8.17E-36	1.32E-33	4087.37	3982.4	4177.8	5477.69	5822.66	5578.62	Atp1a4	ATPase, Na+/K+ transporting, alpha 4 polypeptide [Source:MGI Symbol;Acc:MGI:1351335]
ENSMUSG00000022832	3396.45	-0.462455	0.0423861	-10.9105	1.03E-27	1.16E-25	2931.37	2857.81	2779.16	3917.71	3824.07	4068.56	Ropn1	ropporin, rhophilin associated protein 1 [Source:MGI Symbol;Acc:MGI:1923628]
ENSMUSG00000015165	251.026	-0.45881	0.157296	-2.91686	0.00353575	0.0278744	182.676	242.07	209.72	305.368	317.943	248.378	Hnrnpl	heterogeneous nuclear ribonucleoprotein L [Source:MGI Symbol;Acc:MGI:104816]
ENSMUSG00000016252	464.668	-0.457074	0.113164	-4.03904	5.37E-05	0.000809164	356.788	452.326	365.123	542.68	510.594	560.499	Atp5f1e	ATP synthase F1 subunit epsilon [Source:MGI Symbol;Acc:MGI:1855697]
ENSMUSG00000035152	2967.36	-0.456874	0.0434309	-10.5196	7.02E-26	7.34E-24	2396.19	2542.43	2566.43	3455.52	3438.09	3405.49	Ap2b1	adaptor-related protein complex 2, beta 1 subunit [Source:MGI Symbol;Acc:MGI:1919020]
ENSMUSG00000048994	255.975	-0.456477	0.150695	-3.02914	0.00245252	0.0208894	242.616	192.273	212.737	285.839	332.762	269.626	H2al3	H2A histone family member L3 [Source:MGI Symbol;Acc:MGI:1922521]
ENSMUSG00000051804	374.876	-0.456395	0.118484	-3.85194	0.000117187	0.00160033	326.818	340.282	280.632	438.523	443.907	419.092	Adam6b	a disintegrin and metallopeptidase domain 6B [Source:MGI Symbol;Acc:MGI:2444636]
ENSMUSG00000032115	666.55	-0.456246	0.0936384	-4.87242	1.10E-06	2.29E-05	549.454	524.255	612.562	714.893	800.245	797.887	Hyou1	hypoxia up-regulated 1 [Source:MGI Symbol;Acc:MGI:108030]
ENSMUSG00000059554	323.867	-0.452281	0.142838	-3.16639	0.00154344	0.0145073	221.209	318.149	280.632	352.121	355.665	415.429	Ccdc28a	coiled-coil domain containing 28A [Source:MGI Symbol;Acc:MGI:2443508]
ENSMUSG00000043036	275.43	-0.451477	0.150026	-3.00933	0.00261828	0.0219839	194.093	268.352	235.369	329.632	282.241	342.894	Ccdc63	coiled-coil domain containing 63 [Source:MGI Symbol;Acc:MGI:3607777]
ENSMUSG00000026809	982.139	-0.445433	0.0763564	-5.83361	5.42E-09	1.59E-07	840.593	846.554	808.703	1210.23	1122.9	1063.85	Spaca9	sperm acrosome associated 9 [Source:MGI Symbol;Acc:MGI:1917237]
ENSMUSG00000026331	302.33	-0.44499	0.136764	-3.25372	0.00113906	0.0112841	251.179	278.035	238.386	315.429	387.324	343.626	Slco6c1	solute carrier organic anion transporter family, member 6c1 [Source:MGI Symbol;Acc:MGI:1921691]
ENSMUSG00000026864	2281.98	-0.444565	0.0609087	-7.29888	2.90E-13	1.34E-11	1936.65	1864.63	2000.63	2881.47	2440.48	2568.04	Hspa5	heat shock protein 5 [Source:MGI Symbol;Acc:MGI:95835]
ENSMUSG00000001794	246.317	-0.443512	0.15874	-2.79395	0.00520682	0.0377357	215.5	174.291	236.878	259.8	324.005	267.428	Capns1	calpain, small subunit 1 [Source:MGI Symbol;Acc:MGI:88266]
ENSMUSG00000029433	365.964	-0.443372	0.127415	-3.47975	0.000501884	0.00568802	269.732	331.982	328.913	443.258	377.894	444.003	Diablo	diablo, IAP-binding mitochondrial protein [Source:MGI Symbol;Acc:MGI:1913843]
ENSMUSG00000003660	513.05	-0.441268	0.112259	-3.93081	8.47E-05	0.00121644	363.924	459.242	482.808	610.145	549.663	612.519	Snrnp200	small nuclear ribonucleoprotein 200 (U5) [Source:MGI Symbol;Acc:MGI:2444401]
ENSMUSG00000027719	399.263	-0.433866	0.130997	-3.31203	0.000926209	0.00956543	375.341	264.202	380.211	442.074	480.955	452.795	Adad1	adenosine deaminase domain containing 1 [Source:MGI Symbol;Acc:MGI:103258]
ENSMUSG00000026650	1765.64	-0.433517	0.0563859	-7.68839	1.49E-14	7.69E-13	1542.75	1556.17	1406.18	1998.51	2033.62	2056.63	Meig1	meiosis expressed gene 1 [Source:MGI Symbol;Acc:MGI:1202878]
ENSMUSG00000058626	195.368	-0.433273	0.161197	-2.68785	0.00719136	0.048726	162.695	167.374	168.983	245.005	214.207	213.942	Capn11	calpain 11 [Source:MGI Symbol;Acc:MGI:1352490]
ENSMUSG00000038709	507.136	-0.430544	0.105493	-4.08124	4.48E-05	0.00069179	466.679	399.762	430.001	577.004	626.455	542.915	Txndc8	thioredoxin domain containing 8 [Source:MGI Symbol;Acc:MGI:1914652]
ENSMUSG00000030082	449.578	-0.429457	0.142672	-3.01011	0.00261156	0.0219498	326.818	361.03	461.685	472.256	449.97	625.708	Sec61a1	SEC61 translocon subunit alpha 1 [Source:MGI Symbol;Acc:MGI:1858417]
ENSMUSG00000028310	1342.77	-0.426958	0.062194	-6.86494	6.65E-12	2.83E-10	1148.86	1153.64	1134.6	1574.78	1565.46	1479.28	Ppp3r2	protein phosphatase 3, regulatory subunit B, alpha isoform (calcineurin B, type II) [Source:MGI Symbol;Acc:MGI:107171]
ENSMUSG00000068860	279.722	-0.42187	0.144729	-2.9149	0.00355801	0.0279875	266.878	237.92	212.737	360.998	303.797	296.002	Gm128	predicted gene 128 [Source:MGI Symbol;Acc:MGI:2684974]
ENSMUSG00000036752	1199.33	-0.416354	0.0661577	-6.29336	3.11E-10	1.12E-08	1018.99	1074.79	988.247	1410.26	1343.85	1359.85	Tubb4b	tubulin, beta 4B class IVB [Source:MGI Symbol;Acc:MGI:1915472]
ENSMUSG00000020850	556.745	-0.407077	0.106202	-3.83304	0.000126569	0.00170868	556.59	430.193	449.615	664.591	612.309	627.173	Prpf8	pre-mRNA processing factor 8 [Source:MGI Symbol;Acc:MGI:2179381]
ENSMUSG00000039218	406.845	-0.405133	0.115897	-3.49562	0.000472962	0.00538981	336.808	344.431	369.65	470.48	499.143	420.558	Srrm2	serine/arginine repetitive matrix 2 [Source:MGI Symbol;Acc:MGI:1923206]
ENSMUSG00000062154	754.138	-0.397932	0.0848306	-4.69091	2.72E-06	5.29E-05	680.752	639.065	632.176	865.21	804.96	902.66	Cimip4	ciliary microtubule inner protein 4 [Source:MGI Symbol;Acc:MGI:1920626]
ENSMUSG00000025544	393.157	-0.396852	0.132714	-2.99027	0.0027873	0.0231444	278.295	349.964	390.773	492.969	401.47	445.469	Tm9sf2	transmembrane 9 superfamily member 2 [Source:MGI Symbol;Acc:MGI:1915309]
ENSMUSG00000014195	804.825	-0.395403	0.0852034	-4.6407	3.47E-06	6.67E-05	666.481	756.642	662.352	938.594	949.112	855.769	Dnajc7	DnaJ heat shock protein family (Hsp40) member C7 [Source:MGI Symbol;Acc:MGI:1928373]
ENSMUSG00000061607	380.618	-0.395304	0.121633	-3.24997	0.00115416	0.0113655	279.722	337.515	369.65	439.115	429.088	428.617	Mdc1	mediator of DNA damage checkpoint 1 [Source:MGI Symbol;Acc:MGI:3525201]
ENSMUSG00000067702	1927.14	-0.394962	0.0601011	-6.57162	4.98E-11	2.03E-09	1704.02	1760.89	1528.39	2250.02	2076.06	2243.46	Tuba3a	tubulin, alpha 3A [Source:MGI Symbol;Acc:MGI:1095406]
ENSMUSG00000030137	1363.03	-0.3944	0.0690581	-5.71113	1.12E-08	3.14E-07	1148.86	1213.12	1170.81	1451.68	1679.98	1513.71	Tuba8	tubulin, alpha 8 [Source:MGI Symbol;Acc:MGI:1858225]
ENSMUSG00000060843	350.741	-0.390557	0.142019	-2.75004	0.00595885	0.0419711	256.888	383.163	270.071	409.525	408.206	376.597	Ctnna3	catenin alpha 3 [Source:MGI Symbol;Acc:MGI:2661445]
ENSMUSG00000039630	943.354	-0.386936	0.0875132	-4.42146	9.80E-06	0.000175319	869.136	722.061	861.51	974.102	1093.26	1140.05	Hnrnpu	heterogeneous nuclear ribonucleoprotein U [Source:MGI Symbol;Acc:MGI:1858195]
ENSMUSG00000031552	290.494	-0.386214	0.138198	-2.79465	0.00519553	0.0376869	245.47	283.568	226.316	345.019	342.192	300.398	Adam18	a disintegrin and metallopeptidase domain 18 [Source:MGI Symbol;Acc:MGI:105986]
ENSMUSG00000027606	702.486	-0.385304	0.102148	-3.772	0.000161943	0.0021137	682.179	553.303	591.44	699.507	839.314	849.175	Dnajc5b	DnaJ heat shock protein family (Hsp40) member C5 beta [Source:MGI Symbol;Acc:MGI:1913576]
ENSMUSG00000032480	306.784	-0.381357	0.140353	-2.71712	0.00658527	0.0454153	301.129	244.837	253.474	368.691	301.102	371.468	Dhx30	DExH-box helicase 30 [Source:MGI Symbol;Acc:MGI:1920081]
ENSMUSG00000031898	826.352	-0.379501	0.0848733	-4.47139	7.77E-06	0.000140191	769.236	738.66	645.755	931.492	891.182	981.789	Dpep3	dipeptidase 3 [Source:MGI Symbol;Acc:MGI:1919104]
ENSMUSG00000030062	369.02	-0.378014	0.124292	-3.04133	0.00235533	0.0202074	302.556	361.03	298.737	400.056	455.358	396.379	Rpn1	ribophorin I [Source:MGI Symbol;Acc:MGI:98084]
ENSMUSG00000020799	460.012	-0.377812	0.106105	-3.56074	0.000369816	0.00434626	422.437	412.211	365.123	506.58	541.58	512.142	Tekt1	tektin 1 [Source:MGI Symbol;Acc:MGI:1333819]
ENSMUSG00000024208	422.559	-0.377721	0.11324	-3.33559	0.000851175	0.00891307	353.934	356.881	392.281	498.887	435.15	498.222	Uqcc2	ubiquinol-cytochrome c reductase complex assembly factor 2 [Source:MGI Symbol;Acc:MGI:1914517]
ENSMUSG00000067338	2241.93	-0.376435	0.0520901	-7.22661	4.95E-13	2.21E-11	1906.68	1901.98	2045.9	2485.56	2645.25	2466.2	Tuba3b	tubulin, alpha 3B [Source:MGI Symbol;Acc:MGI:1095408]
ENSMUSG00000029703	398.13	-0.370043	0.129783	-2.85124	0.00435494	0.0329794	284.003	354.114	404.352	424.32	489.712	432.28	Lrwd1	leucine-rich repeats and WD repeat domain containing 1 [Source:MGI Symbol;Acc:MGI:1918985]
ENSMUSG00000026125	1016.17	-0.369817	0.0706791	-5.23234	1.67E-07	4.06E-06	869.136	886.669	903.756	1122.64	1124.92	1189.87	Prss39	serine protease 39 [Source:MGI Symbol;Acc:MGI:1270856]
ENSMUSG00000041763	413.77	-0.369479	0.110835	-3.33359	0.000857338	0.00895491	339.662	391.462	351.544	453.91	466.136	479.905	Tpp2	tripeptidyl peptidase II [Source:MGI Symbol;Acc:MGI:102724]
ENSMUSG00000027355	1293.19	-0.366582	0.0708171	-5.17646	2.26E-07	5.29E-06	1211.65	1171.62	1004.84	1465.29	1488	1417.73	Tmco5	transmembrane and coiled-coil domains 5 [Source:MGI Symbol;Acc:MGI:1914606]
ENSMUSG00000070331	2501.71	-0.364874	0.0472936	-7.71507	1.21E-14	6.36E-13	2210.66	2227.05	2121.34	2768.44	2772.57	2910.2	Qrich2	glutamine rich 2 [Source:MGI Symbol;Acc:MGI:2684912]
ENSMUSG00000071015	327.72	-0.362088	0.133395	-2.7144	0.00663962	0.0456758	289.712	319.533	250.457	374.609	333.435	398.577	Gm136	predicted gene 136 [Source:MGI Symbol;Acc:MGI:2684982]
ENSMUSG00000027442	1269.78	-0.361628	0.0651983	-5.54658	2.91E-08	7.79E-07	1160.28	1042.98	1131.58	1423.28	1401.1	1459.5	Cst8	cystatin 8 (cystatin-related epididymal spermatogenic) [Source:MGI Symbol;Acc:MGI:107161]
ENSMUSG00000031430	434.755	-0.357504	0.108343	-3.29974	0.000967729	0.0099445	352.507	412.211	378.702	496.52	493.08	475.508	Vsig1	V-set and immunoglobulin domain containing 1 [Source:MGI Symbol;Acc:MGI:1926039]
ENSMUSG00000035021	574.05	-0.355793	0.0976466	-3.64368	0.000268764	0.00327996	543.745	468.925	497.896	625.532	622.413	685.787	Baz1a	bromodomain adjacent to zinc finger domain 1A [Source:MGI Symbol;Acc:MGI:1309478]
ENSMUSG00000051223	598.18	-0.354322	0.101233	-3.50008	0.00046512	0.00532247	580.851	455.092	540.141	701.874	639.253	671.866	Bzw1	basic leucine zipper and W2 domains 1 [Source:MGI Symbol;Acc:MGI:1914132]
ENSMUSG00000003435	350.388	-0.35136	0.129694	-2.70915	0.0067456	0.0462891	281.149	290.484	353.053	426.687	359.706	391.25	Supt5	suppressor of Ty 5, DSIF elongation factor subunit [Source:MGI Symbol;Acc:MGI:1202400]
ENSMUSG00000023257	541.53	-0.350165	0.113075	-3.09674	0.00195663	0.0176288	462.398	503.506	463.194	706.608	553.705	559.767	Cypt1	cysteine-rich perinuclear theca 1 [Source:MGI Symbol;Acc:MGI:3616441]
ENSMUSG00000032575	343.429	-0.347369	0.119509	-2.90663	0.00365342	0.0284757	303.984	311.233	291.193	367.507	395.407	391.25	Manf	mesencephalic astrocyte-derived neurotrophic factor [Source:MGI Symbol;Acc:MGI:1922090]
ENSMUSG00000020114	427.171	-0.347104	0.120617	-2.87775	0.00400527	0.0307542	331.1	352.731	445.088	488.234	451.317	494.558	Cand1	cullin associated and neddylation disassociated 1 [Source:MGI Symbol;Acc:MGI:1261820]
ENSMUSG00000061666	356.948	-0.346674	0.126753	-2.73505	0.00623715	0.0435231	313.974	331.982	297.229	449.176	386.65	362.676	Gdpd1	glycerophosphodiester phosphodiesterase domain containing 1 [Source:MGI Symbol;Acc:MGI:1913819]
ENSMUSG00000029423	640.452	-0.344874	0.0917926	-3.75709	0.000171897	0.00222954	540.891	576.819	574.843	678.202	768.586	703.372	Piwil1	piwi-like RNA-mediated gene silencing 1 [Source:MGI Symbol;Acc:MGI:1928897]
ENSMUSG00000020048	1546.92	-0.344281	0.0691525	-4.97857	6.41E-07	1.41E-05	1357.22	1520.2	1210.04	1719.18	1739.93	1734.98	Hsp90b1	heat shock protein 90, beta (Grp94), member 1 [Source:MGI Symbol;Acc:MGI:98817]
ENSMUSG00000038997	1858.84	-0.341982	0.0578896	-5.90747	3.47E-09	1.03E-07	1522.77	1632.25	1765.27	2086.68	2107.04	2039.04	Asb17	ankyrin repeat and SOCS box-containing 17 [Source:MGI Symbol;Acc:MGI:1914022]
ENSMUSG00000037926	608.424	-0.341816	0.0905354	-3.7755	0.00015969	0.0020909	508.067	538.088	564.282	688.854	666.197	685.055	Ssh2	slingshot protein phosphatase 2 [Source:MGI Symbol;Acc:MGI:2679255]
ENSMUSG00000053470	383.874	-0.341448	0.115471	-2.95701	0.00310633	0.0250875	329.672	372.097	313.825	439.115	425.046	423.488	Kdm3a	lysine (K)-specific demethylase 3A [Source:MGI Symbol;Acc:MGI:98847]
ENSMUSG00000027642	396.553	-0.34113	0.119368	-2.85781	0.00426579	0.032453	369.633	380.396	298.737	426.095	464.115	440.34	Rpn2	ribophorin II [Source:MGI Symbol;Acc:MGI:98085]
ENSMUSG00000007867	346.835	-0.336816	0.120417	-2.79708	0.00515672	0.0374713	321.109	308.467	289.685	389.404	366.442	405.904	Ift43	intraflagellar transport 43 [Source:MGI Symbol;Acc:MGI:1923661]
ENSMUSG00000048686	2217.88	-0.336037	0.053179	-6.31898	2.63E-10	9.54E-09	1865.29	1984.98	2033.83	2595.04	2400.06	2428.1	Hmgb4	high-mobility group box 4 [Source:MGI Symbol;Acc:MGI:1916567]
ENSMUSG00000043535	1425.65	-0.333929	0.0759449	-4.397	1.10E-05	0.000195016	1247.33	1103.84	1434.84	1548.15	1642.25	1577.46	Setx	senataxin [Source:MGI Symbol;Acc:MGI:2443480]
ENSMUSG00000017049	1440.11	-0.333365	0.0797046	-4.18251	2.88E-05	0.000463416	1227.35	1146.72	1449.93	1472.4	1625.41	1718.86	Ccdc70	coiled-coil domain containing 70 [Source:MGI Symbol;Acc:MGI:1915179]
ENSMUSG00000024501	2919.82	-0.328867	0.056984	-5.77121	7.87E-09	2.25E-07	2304.85	2671.07	2789.72	3187.43	3179.43	3386.44	Dpysl3	dihydropyrimidinase-like 3 [Source:MGI Symbol;Acc:MGI:1349762]
ENSMUSG00000047995	556.144	-0.328834	0.110571	-2.97398	0.00293966	0.024047	483.805	510.422	484.317	624.94	531.476	701.906	Cypt4	cysteine-rich perinuclear theca 4 [Source:MGI Symbol;Acc:MGI:1916573]
ENSMUSG00000037487	987.879	-0.32575	0.0773113	-4.21348	2.51E-05	0.000408976	792.07	900.501	938.458	1119.09	1056.89	1120.27	Ubr5	ubiquitin protein ligase E3 component n-recognin 5 [Source:MGI Symbol;Acc:MGI:1918040]
ENSMUSG00000062651	3633.8	-0.321613	0.0410287	-7.83874	4.55E-15	2.52E-13	3249.63	3325.35	3115.62	4073.35	4120.45	3918.37	H2al2a	H2A histone family member L2A [Source:MGI Symbol;Acc:MGI:1915481]
ENSMUSG00000022723	792.881	-0.32029	0.0832485	-3.84739	0.000119381	0.00162492	744.974	688.863	681.966	920.248	825.169	896.066	Crybg3	beta-gamma crystallin domain containing 3 [Source:MGI Symbol;Acc:MGI:2676311]
ENSMUSG00000051732	861.569	-0.318601	0.0872173	-3.65296	0.000259233	0.00319056	756.391	842.404	701.58	1031.51	944.397	893.135	Pabpc2	poly(A) binding protein, cytoplasmic 2 [Source:MGI Symbol;Acc:MGI:1349723]
ENSMUSG00000032078	383.786	-0.318068	0.114263	-2.78364	0.00537526	0.038603	359.643	315.383	350.036	412.484	435.824	429.35	Zpr1	ZPR1 zinc finger [Source:MGI Symbol;Acc:MGI:1330262]
ENSMUSG00000027742	486.404	-0.314288	0.103	-3.05134	0.0022782	0.0197094	419.583	471.691	408.878	533.211	526.761	558.301	Cog6	component of oligomeric golgi complex 6 [Source:MGI Symbol;Acc:MGI:1914792]
ENSMUSG00000041399	1391.65	-0.312873	0.0717017	-4.36353	1.28E-05	0.000222137	1348.66	1267.06	1107.44	1552.29	1611.27	1463.16	1700013G24Rik	RIKEN cDNA 1700013G24 gene [Source:MGI Symbol;Acc:MGI:1916630]
ENSMUSG00000032101	659.899	-0.312865	0.0853842	-3.6642	0.000248111	0.00306411	585.133	592.035	588.422	719.036	728.169	746.6	Ddx25	DEAD box helicase 25 [Source:MGI Symbol;Acc:MGI:1353582]
ENSMUSG00000058290	406.913	-0.312601	0.115227	-2.71292	0.00666923	0.0458413	332.527	359.647	396.808	419.586	465.462	467.449	Espl1	extra spindle pole bodies 1, separase [Source:MGI Symbol;Acc:MGI:2146156]
ENSMUSG00000068747	555.155	-0.311931	0.107025	-2.91457	0.00356177	0.0279875	423.864	550.537	511.474	625.532	572.566	646.955	Sort1	sortilin 1 [Source:MGI Symbol;Acc:MGI:1338015]
ENSMUSG00000032110	515.721	-0.311107	0.110933	-2.80445	0.00504024	0.0368192	428.146	445.409	508.457	582.33	624.434	505.548	Acrv1	acrosomal vesicle protein 1 [Source:MGI Symbol;Acc:MGI:104590]
ENSMUSG00000050996	759.984	-0.309958	0.0921589	-3.3633	0.000770154	0.00817868	699.305	679.18	656.317	797.154	782.058	945.888	Cetn1	centrin 1 [Source:MGI Symbol;Acc:MGI:1347086]
ENSMUSG00000027331	1075.38	-0.307471	0.071548	-4.29741	1.73E-05	0.000290781	923.368	1037.44	921.861	1197.8	1159.95	1211.85	Knstrn	kinetochore-localized astrin/SPAG5 binding [Source:MGI Symbol;Acc:MGI:1289298]
ENSMUSG00000003923	1525.84	-0.301718	0.0688229	-4.38398	1.17E-05	0.000205281	1271.59	1517.43	1309.62	1646.98	1634.84	1774.55	Tfam	transcription factor A, mitochondrial [Source:MGI Symbol;Acc:MGI:107810]
ENSMUSG00000035785	522.036	-0.300229	0.10291	-2.91739	0.00352975	0.0278537	435.282	489.674	478.281	531.436	614.33	583.212	Cmtm2b	CKLF-like MARVEL transmembrane domain containing 2B [Source:MGI Symbol;Acc:MGI:2447311]
ENSMUSG00000028441	2130.9	-0.299199	0.0538478	-5.55639	2.75E-08	7.44E-07	1985.17	1791.32	1956.88	2392.05	2262.65	2397.32	Spmip6	sperm microtubule inner protein 6 [Source:MGI Symbol;Acc:MGI:1920971]
ENSMUSG00000034842	1091.53	-0.296558	0.0762254	-3.89054	0.000100021	0.00140015	969.037	894.968	1077.26	1242.19	1221.25	1144.44	Art3	ADP-ribosyltransferase 3 [Source:MGI Symbol;Acc:MGI:1202729]
ENSMUSG00000021076	447.613	-0.293383	0.108186	-2.71184	0.00669112	0.0459535	389.613	412.211	404.352	452.726	514.636	512.142	Actr10	ARP10 actin-related protein 10 [Source:MGI Symbol;Acc:MGI:1891654]
ENSMUSG00000049811	856.625	-0.290335	0.0891264	-3.25756	0.00112373	0.0111724	717.858	809.206	784.563	947.471	845.377	1035.28	Fam161a	family with sequence similarity 161, member A [Source:MGI Symbol;Acc:MGI:1921123]
ENSMUSG00000037331	716.711	-0.288119	0.0875673	-3.29026	0.00100095	0.0102097	646.5	592.035	698.563	777.624	818.433	767.115	Larp1	La ribonucleoprotein 1, translational regulator [Source:MGI Symbol;Acc:MGI:1890165]
ENSMUSG00000037437	1239.61	-0.288067	0.066891	-4.30651	1.66E-05	0.000281372	1043.25	1132.89	1173.83	1406.11	1353.95	1327.61	Adam32	a disintegrin and metallopeptidase domain 32 [Source:MGI Symbol;Acc:MGI:2653822]
ENSMUSG00000048077	4016.18	-0.279718	0.0375419	-7.45083	9.28E-14	4.51E-12	3596.43	3686.38	3601.44	4410.09	4499.7	4303.02	H1f7	H1.7 linker histone [Source:MGI Symbol;Acc:MGI:1917319]
ENSMUSG00000078577	1122.25	-0.278859	0.0745337	-3.74139	0.000183008	0.00236096	900.534	1085.86	1056.14	1249.29	1207.1	1234.56	Tmco2	transmembrane and coiled-coil domains 2 [Source:MGI Symbol;Acc:MGI:1916719]
ENSMUSG00000037747	859.699	-0.278107	0.0843329	-3.29773	0.000974697	0.0100037	822.04	694.396	816.247	968.184	969.321	888.007	Phyhipl	phytanoyl-CoA hydroxylase interacting protein-like [Source:MGI Symbol;Acc:MGI:1918161]
ENSMUSG00000050799	1371.72	-0.277065	0.064892	-4.26963	1.96E-05	0.000324838	1141.72	1260.15	1320.18	1520.92	1476.55	1510.78	H2bc1	H2B clustered histone 1 [Source:MGI Symbol;Acc:MGI:2448375]
ENSMUSG00000022085	1357.45	-0.273005	0.0684369	-3.98916	6.63E-05	0.000987102	1347.23	1220.03	1119.51	1461.74	1475.87	1520.31	Pebp4	phosphatidylethanolamine binding protein 4 [Source:MGI Symbol;Acc:MGI:1920773]
ENSMUSG00000026000	742.904	-0.271965	0.0821414	-3.31093	0.000929852	0.00959105	660.772	713.761	644.247	820.826	809.676	808.145	Lancl1	LanC (bacterial lantibiotic synthetase component C)-like 1 [Source:MGI Symbol;Acc:MGI:1336997]
ENSMUSG00000001289	809.737	-0.268178	0.0869641	-3.08378	0.00204388	0.0181967	695.024	746.96	763.44	968.775	862.891	821.333	Pfdn5	prefoldin 5 [Source:MGI Symbol;Acc:MGI:1928753]
ENSMUSG00000028938	1830.11	-0.267166	0.059597	-4.48288	7.36E-06	0.000134016	1655.5	1687.58	1638.53	1931.04	1911.02	2157.01	Galntl5	UDP-N-acetyl-alpha-D-galactosamine:polypeptide N-acetylgalactosaminyltransferase-like 5 [Source:MGI Symbol;Acc:MGI:1915159]
ENSMUSG00000009013	909.273	-0.266237	0.077435	-3.43819	0.000585607	0.00646829	762.1	831.338	884.142	1011.38	967.3	999.374	Dynll1	dynein light chain LC8-type 1 [Source:MGI Symbol;Acc:MGI:1861457]
ENSMUSG00000022246	2197.66	-0.265614	0.0511286	-5.19501	2.05E-07	4.87E-06	2017.99	1994.66	1973.48	2283.75	2466.75	2449.34	Rai14	retinoic acid induced 14 [Source:MGI Symbol;Acc:MGI:1922896]
ENSMUSG00000009093	938.744	-0.263726	0.0812682	-3.24513	0.00117395	0.0114919	917.659	781.541	860.001	984.162	991.55	1097.55	Gstt4	glutathione S-transferase, theta 4 [Source:MGI Symbol;Acc:MGI:1923136]
ENSMUSG00000043050	19206	-0.239208	0.0204528	-11.6956	1.34E-31	1.76E-29	17528.3	17456.7	17868.4	20813	20429.2	21140.7	Tnp2	transition protein 2 [Source:MGI Symbol;Acc:MGI:98785]
ENSMUSG00000031518	871.553	-0.238571	0.0866504	-2.75326	0.00590055	0.0416314	713.577	906.034	778.528	949.838	912.738	968.601	Spata4	spermatogenesis associated 4 [Source:MGI Symbol;Acc:MGI:1916531]
ENSMUSG00000038759	1273.16	-0.234953	0.0741465	-3.16877	0.00153086	0.0144219	1073.22	1273.98	1160.25	1277.69	1411.88	1441.91	Nup205	nucleoporin 205 [Source:MGI Symbol;Acc:MGI:2141625]
ENSMUSG00000029883	1470.34	-0.234062	0.0610269	-3.8354	0.00012536	0.00169791	1411.45	1268.45	1374.49	1557.62	1618.68	1591.38	Prss59	serine protease 59 [Source:MGI Symbol;Acc:MGI:1920731]
ENSMUSG00000026466	1216.01	-0.233206	0.0755966	-3.08487	0.00203642	0.0181865	990.444	1196.52	1166.28	1287.16	1265.03	1390.62	Tor1aip1	torsin A interacting protein 1 [Source:MGI Symbol;Acc:MGI:3582693]
ENSMUSG00000031553	5865.21	-0.230209	0.0361188	-6.37365	1.85E-10	6.90E-09	5585.88	5102.84	5507.03	6202.65	6413.41	6379.43	Adam3	ADAM metallopeptidase domain 3 [Source:MGI Symbol;Acc:MGI:102518]
ENSMUSG00000027602	883.829	-0.227256	0.0777378	-2.92337	0.00346264	0.0273764	784.934	847.938	810.212	946.287	1004.35	909.254	Map1lc3a	microtubule-associated protein 1 light chain 3 alpha [Source:MGI Symbol;Acc:MGI:1915661]
ENSMUSG00000063129	1540.84	-0.213169	0.0638052	-3.34094	0.00083496	0.00879903	1322.97	1395.71	1564.6	1672.42	1642.25	1647.06	Aldoart2	aldolase 1 A, retrogene 2 [Source:MGI Symbol;Acc:MGI:1931052]
ENSMUSG00000004070	2302.45	-0.21132	0.049509	-4.26832	1.97E-05	0.000326099	2067.94	2148.2	2187.72	2508.05	2526.7	2376.08	Hmox2	heme oxygenase 2 [Source:MGI Symbol;Acc:MGI:109373]
ENSMUSG00000029580	1092.35	-0.203114	0.0691828	-2.9359	0.00332577	0.0266255	1013.28	1004.25	1028.98	1166.44	1116.84	1224.31	Actb	actin, beta [Source:MGI Symbol;Acc:MGI:87904]
ENSMUSG00000026931	2699.94	-0.195806	0.0494056	-3.96324	7.39E-05	0.00108032	2361.94	2489.87	2700.71	2869.63	2870.24	2907.27	Spmip5	sperm microtubule inner protein 5 [Source:MGI Symbol;Acc:MGI:1914757]
ENSMUSG00000026585	1274.33	-0.192826	0.0658228	-2.92948	0.00339534	0.0269993	1114.61	1214.5	1238.7	1351.08	1319.6	1407.48	Kifap3	kinesin-associated protein 3 [Source:MGI Symbol;Acc:MGI:107566]
ENSMUSG00000037062	1811.65	-0.192502	0.0624141	-3.08427	0.00204053	0.0181865	1568.44	1680.66	1824.11	1831.03	2025.54	1940.13	Sh3glb1	SH3-domain GRB2-like B1 (endophilin) [Source:MGI Symbol;Acc:MGI:1859730]
ENSMUSG00000024033	1356.6	-0.190546	0.0664854	-2.86599	0.0041571	0.0317137	1167.41	1358.36	1274.91	1442.81	1405.82	1490.27	Rsph1	radial spoke head 1 homolog (Chlamydomonas) [Source:MGI Symbol;Acc:MGI:1194909]
ENSMUSG00000031991	1205.33	-0.190208	0.0676943	-2.8098	0.00495718	0.0363409	1185.96	1130.12	1060.67	1270.59	1247.52	1337.14	Spata19	spermatogenesis associated 19 [Source:MGI Symbol;Acc:MGI:1922719]
ENSMUSG00000068039	3123.36	-0.188904	0.0517873	-3.64769	0.000264612	0.00323885	2710.16	3130.31	2916.46	3423.56	3158.54	3401.09	Tcp1	t-complex protein 1 [Source:MGI Symbol;Acc:MGI:98535]
ENSMUSG00000030007	1217.02	-0.188826	0.063723	-2.96323	0.0030443	0.0247073	1131.73	1174.39	1105.93	1312.02	1281.2	1296.84	Cct7	chaperonin containing TCP1 subunit 7 [Source:MGI Symbol;Acc:MGI:107184]
ENSMUSG00000059970	3277.89	-0.175647	0.0429657	-4.08808	4.35E-05	0.000678034	3052.68	3218.84	2961.72	3406.99	3542.5	3484.62	Hspa2	heat shock protein 2 [Source:MGI Symbol;Acc:MGI:96243]
ENSMUSG00000030851	13024.9	-0.167808	0.0250272	-6.70504	2.01E-11	8.32E-10	11885.3	12529.6	12387	13551.6	13801.5	13994.2	Ldhc	lactate dehydrogenase C [Source:MGI Symbol;Acc:MGI:96764]
ENSMUSG00000053624	2051.81	-0.16374	0.0541748	-3.02245	0.00250741	0.021313	1970.9	1987.74	1845.23	2070.11	2183.16	2253.72	Gykl1	glycerol kinase-like 1 [Source:MGI Symbol;Acc:MGI:891990]
ENSMUSG00000029074	1964.38	-0.156641	0.0553164	-2.83172	0.00462981	0.0343679	1831.04	1756.74	1987.06	2058.87	2032.95	2119.64	Ttll10	tubulin tyrosine ligase-like family, member 10 [Source:MGI Symbol;Acc:MGI:1921855]
ENSMUSG00000073758	2849.5	-0.147257	0.0429933	-3.42512	0.000614533	0.00672486	2628.82	2767.9	2715.79	3015.81	2962.52	3006.18	Sh3d21	SH3 domain containing 21 [Source:MGI Symbol;Acc:MGI:1914188]
ENSMUSG00000051276	3988.36	-0.146533	0.0383895	-3.817	0.000135085	0.00180594	3750.56	3669.78	3939.41	4190.53	4150.09	4229.75	Actrt2	actin-related protein T2 [Source:MGI Symbol;Acc:MGI:1920603]
ENSMUSG00000026827	5488.11	-0.137909	0.0338169	-4.0781	4.54E-05	0.000697574	5261.91	5118.06	5297.31	5665.29	5661.67	5924.44	Gpd2	glycerol phosphate dehydrogenase 2, mitochondrial [Source:MGI Symbol;Acc:MGI:99778]
ENSMUSG00000031554	3115.55	-0.134454	0.0439378	-3.06009	0.00221273	0.0192844	3004.16	2856.43	3053.76	3356.09	3256.22	3166.64	Adam5	a disintegrin and metallopeptidase domain 5 [Source:MGI Symbol;Acc:MGI:104730]
ENSMUSG00000020681	9031.69	-0.088985	0.0293511	-3.03175	0.00243144	0.0207527	8728.47	8946.92	8578.89	9056.3	9274.9	9604.69	Ace	angiotensin I converting enzyme [Source:MGI Symbol;Acc:MGI:87874]
ENSMUSG00000026182	48769.5	0.0511431	0.014466	3.53539	0.000407176	0.00473001	49673.5	50423.9	48798.3	47894.9	48063.9	47762.6	Tnp1	transition protein 1 [Source:MGI Symbol;Acc:MGI:98784]
ENSMUSG00000020867	10300.2	0.0795482	0.0278799	2.85325	0.0043275	0.0328477	10906.3	10637.3	10208.4	10128.1	10101.4	9820.09	Spata20	spermatogenesis associated 20 [Source:MGI Symbol;Acc:MGI:2183449]
ENSMUSG00000030189	4054.87	0.0987774	0.0356334	2.77205	0.00557053	0.0397098	4195.83	4199.57	4185.34	3896.41	3960.81	3891.26	Ybx3	Y box protein 3 [Source:MGI Symbol;Acc:MGI:2137670]
ENSMUSG00000050058	5173.7	0.109665	0.0355751	3.08263	0.00205178	0.0182277	5201.97	5434.82	5476.85	5130.31	4936.19	4862.06	Prm3	protamine 3 [Source:MGI Symbol;Acc:MGI:106601]
ENSMUSG00000062028	4127.49	0.140276	0.0425506	3.29669	0.000978299	0.0100282	4131.61	4382.16	4468.99	3851.43	3807.23	4123.52	Irgc	immunity related GTPase cinema [Source:MGI Symbol;Acc:MGI:2685948]
ENSMUSG00000027564	3488.18	0.152411	0.0455858	3.3434	0.000827599	0.00875496	3604.99	3485.81	3928.85	3369.11	3219.84	3320.5	Cypt12	cysteine-rich perinuclear theca 12 [Source:MGI Symbol;Acc:MGI:1922689]
ENSMUSG00000028572	2010.04	0.167647	0.0563051	2.97747	0.0029064	0.0237985	2042.26	2080.42	2257.13	1794.34	1946.72	1939.4	Hook1	hook microtubule tethering protein 1 [Source:MGI Symbol;Acc:MGI:1925213]
ENSMUSG00000110170	2320.93	0.168441	0.0489694	3.43973	0.000582301	0.00644039	2437.58	2383.35	2549.83	2203.27	2237.05	2114.51	St6galnac2	ST6 (alpha-N-acetyl-neuraminyl-2,3-beta-galactosyl-1,3)-N-acetylgalactosaminide alpha-2,6-sialyltransferase 2 [Source:MGI Symbol;Acc:MGI:107553]
ENSMUSG00000033826	5955.38	0.171439	0.034513	4.96736	6.79E-07	1.48E-05	6181	6627.19	6116.57	5665.29	5559.95	5582.28	Dnah8	dynein, axonemal, heavy chain 8 [Source:MGI Symbol;Acc:MGI:107714]
ENSMUSG00000030662	4595.03	0.175124	0.0415775	4.21199	2.53E-05	0.000410876	4865.17	4639.45	5117.76	4201.77	4503.06	4242.94	Ipo5	importin 5 [Source:MGI Symbol;Acc:MGI:1917822]
ENSMUSG00000062859	10317.8	0.175147	0.024228	7.22909	4.86E-13	2.18E-11	10924.9	10883.5	11021.6	9703.73	9564.55	9808.37	Tcp11	t-complex protein 11 [Source:MGI Symbol;Acc:MGI:98544]
ENSMUSG00000034401	3009.93	0.198812	0.0506739	3.92337	8.73E-05	0.00124816	3192.54	3025.19	3436.99	2902.78	2835.89	2666.22	Spata6	spermatogenesis associated 6 [Source:MGI Symbol;Acc:MGI:1915196]
ENSMUSG00000030695	989.717	0.206562	0.0758502	2.72329	0.0064636	0.0447255	1123.17	998.713	1059.16	912.554	870.974	973.73	Aldoa	aldolase A, fructose-bisphosphate [Source:MGI Symbol;Acc:MGI:87994]
ENSMUSG00000066368	2563.35	0.214062	0.0513407	4.16945	3.05E-05	0.000487951	2577.44	2878.56	2801.79	2294.41	2352.91	2474.99	Actl11	actin-like 11 [Source:MGI Symbol;Acc:MGI:1914972]
ENSMUSG00000048772	1107.19	0.215617	0.0701405	3.07407	0.00211159	0.0186207	1248.76	1213.12	1105.93	994.223	1024.56	1056.52	Tmem53	transmembrane protein 53 [Source:MGI Symbol;Acc:MGI:1916027]
ENSMUSG00000030161	1088.46	0.220124	0.0760725	2.8936	0.00380848	0.0294899	1113.18	1091.39	1311.12	1020.85	1012.43	981.789	Gabarapl1	GABA type A receptor associated protein like 1 [Source:MGI Symbol;Acc:MGI:1914980]
ENSMUSG00000076433	1581.95	0.22609	0.0594681	3.80187	0.000143606	0.00190445	1666.91	1697.26	1754.7	1516.19	1479.91	1376.7	Cep295nl	CEP295 N-terminal like [Source:MGI Symbol;Acc:MGI:1929713]
ENSMUSG00000029147	1044.33	0.226663	0.0716409	3.16387	0.00155685	0.0145963	1111.75	1116.29	1149.69	927.349	932.946	1027.95	Ppm1g	protein phosphatase 1G (formerly 2C), magnesium-dependent, gamma isoform [Source:MGI Symbol;Acc:MGI:106065]
ENSMUSG00000034994	3679.75	0.229009	0.0439758	5.20761	1.91E-07	4.59E-06	3754.84	4022.52	4138.57	3438.95	3469.08	3254.56	Eef2	eukaryotic translation elongation factor 2 [Source:MGI Symbol;Acc:MGI:95288]
ENSMUSG00000044948	843.862	0.229607	0.0818106	2.80656	0.00500732	0.0366435	863.428	995.946	872.072	764.013	754.44	813.273	Cfap43	cilia and flagella associated protein 43 [Source:MGI Symbol;Acc:MGI:1289258]
ENSMUSG00000059854	967.405	0.230892	0.08298	2.7825	0.00539421	0.0386866	954.765	1080.32	1099.9	905.453	955.848	808.145	Hydin	HYDIN, axonemal central pair apparatus protein [Source:MGI Symbol;Acc:MGI:2389007]
ENSMUSG00000056076	1094.24	0.233261	0.0698961	3.33725	0.000846116	0.00888261	1201.66	1179.92	1164.77	976.469	969.994	1072.64	Eif3b	eukaryotic translation initiation factor 3, subunit B [Source:MGI Symbol;Acc:MGI:106478]
ENSMUSG00000042197	968.242	0.240921	0.0734766	3.27888	0.00104219	0.0105136	1034.69	1036.06	1077.26	940.961	858.849	861.63	Zfp451	zinc finger protein 451 [Source:MGI Symbol;Acc:MGI:2137896]
ENSMUSG00000028693	1828.87	0.241906	0.0646576	3.74133	0.000183048	0.00236096	1823.9	1962.84	2159.06	1659.41	1588.37	1779.68	Nasp	nuclear autoantigenic sperm protein (histone-binding) [Source:MGI Symbol;Acc:MGI:1355328]
ENSMUSG00000051435	1437.46	0.241965	0.060059	4.02878	5.61E-05	0.000842221	1538.47	1567.23	1567.62	1346.94	1254.93	1349.59	Fhad1	forkhead-associated phosphopeptide binding domain 1 [Source:MGI Symbol;Acc:MGI:1920323]
ENSMUSG00000087279	948.356	0.243292	0.0807211	3.01398	0.00257844	0.0217379	1064.66	1074.79	942.984	819.05	850.092	938.561	4930544D05Rik	RIKEN cDNA 4930544D05 gene [Source:MGI Symbol;Acc:MGI:2148639]
ENSMUSG00000045211	603.696	0.245181	0.0900941	2.72138	0.0065009	0.044946	670.762	654.281	639.72	553.332	577.281	526.796	Nudt18	nudix hydrolase 18 [Source:MGI Symbol;Acc:MGI:2385853]
ENSMUSG00000026226	1154.31	0.248243	0.0653482	3.79878	0.000145409	0.00192468	1204.52	1267.06	1288.49	1036.83	1071.71	1057.26	Spata3	spermatogenesis associated 3 [Source:MGI Symbol;Acc:MGI:1917310]
ENSMUSG00000003123	1892.26	0.249528	0.061334	4.06834	4.73E-05	0.000724452	2180.69	1872.93	2113.79	1760.6	1642.93	1782.61	Lipe	lipase, hormone sensitive [Source:MGI Symbol;Acc:MGI:96790]
ENSMUSG00000045004	4647.37	0.249555	0.0400971	6.22377	4.85E-10	1.69E-08	4985.05	4835.87	5324.46	4112.41	4287.51	4338.92	Spata21	spermatogenesis associated 21 [Source:MGI Symbol;Acc:MGI:3607787]
ENSMUSG00000078627	803.417	0.24998	0.0843896	2.96221	0.00305435	0.0247645	839.166	919.867	860.001	751.585	778.016	671.866	Marchf10	membrane associated ring-CH-type finger 10 [Source:MGI Symbol;Acc:MGI:2443469]
ENSMUSG00000091311	727.693	0.252025	0.0824133	3.05807	0.0022277	0.019374	816.332	773.242	783.054	641.51	657.44	694.579	Spata31d1b	spermatogenesis associated 31 subfamily D, member 1B [Source:MGI Symbol;Acc:MGI:3646080]
ENSMUSG00000060176	1427.5	0.255834	0.0713565	3.5853	0.000336691	0.00401986	1578.43	1652.99	1427.3	1246.33	1241.46	1418.47	Kif27	kinesin family member 27 [Source:MGI Symbol;Acc:MGI:1922300]
ENSMUSG00000022565	3307.02	0.259178	0.040548	6.39188	1.64E-10	6.18E-09	3639.24	3596.47	3575.8	3092.74	3004.96	2932.91	Plec	plectin [Source:MGI Symbol;Acc:MGI:1277961]
ENSMUSG00000048478	758.517	0.264574	0.0819953	3.2267	0.00125227	0.0121435	830.603	813.356	838.879	647.428	699.878	720.956	Spata33	spermatogenesis associated 33 [Source:MGI Symbol;Acc:MGI:2444920]
ENSMUSG00000027227	1053.96	0.264933	0.0720922	3.67492	0.000237922	0.00296488	1131.73	1157.79	1161.76	921.431	1028.6	922.443	Sord	sorbitol dehydrogenase [Source:MGI Symbol;Acc:MGI:98266]
ENSMUSG00000056987	571.035	0.268803	0.0981363	2.73908	0.00616111	0.0431382	619.384	596.184	656.317	499.479	487.018	567.826	Garin2	golgi associated RAB2 interactor 2 [Source:MGI Symbol;Acc:MGI:1918147]
ENSMUSG00000070979	877.798	0.269416	0.0782289	3.44394	0.000573302	0.00636467	893.398	1008.4	976.177	762.829	825.169	800.818	Actl7a	actin-like 7a [Source:MGI Symbol;Acc:MGI:1343051]
ENSMUSG00000033987	1994.86	0.273374	0.0542263	5.04135	4.62E-07	1.04E-05	2166.42	2319.72	2062.49	1831.03	1770.24	1819.24	Dnah17	dynein, axonemal, heavy chain 17 [Source:MGI Symbol;Acc:MGI:1917176]
ENSMUSG00000006299	775.735	0.274765	0.0870836	3.15518	0.00160397	0.0149571	944.775	805.056	798.142	688.854	736.926	680.659	Aamp	angio-associated migratory protein [Source:MGI Symbol;Acc:MGI:107809]
ENSMUSG00000072878	883.07	0.274863	0.0873769	3.14572	0.00165679	0.0153457	876.272	951.682	1074.25	812.54	848.071	735.609	Nup50l	nucleoporin 50 like [Source:MGI Symbol;Acc:MGI:1925732]
ENSMUSG00000024973	3182.04	0.275445	0.0442626	6.22298	4.88E-10	1.69E-08	3362.37	3455.38	3639.16	2900.41	2955.11	2779.78	Plaat5	phospholipase A and acyltransferase 5 [Source:MGI Symbol;Acc:MGI:1913977]
ENSMUSG00000028991	472.155	0.27767	0.100575	2.76082	0.00576557	0.0408885	505.212	532.555	514.492	434.381	408.879	437.409	Mtor	mechanistic target of rapamycin kinase [Source:MGI Symbol;Acc:MGI:1928394]
ENSMUSG00000034913	6334.53	0.277858	0.032611	8.5204	1.59E-17	1.04E-15	6874.6	6906.61	7044.47	5596.65	5642.13	5942.76	Cby2	chibby family member 2 [Source:MGI Symbol;Acc:MGI:1915176]
ENSMUSG00000047654	2013.56	0.279965	0.0530856	5.27385	1.34E-07	3.29E-06	2303.43	2251.94	2068.53	1832.8	1803.25	1821.44	Tssk6	testis-specific serine kinase 6 [Source:MGI Symbol;Acc:MGI:2148775]
ENSMUSG00000026571	471.229	0.283006	0.103738	2.72809	0.00637027	0.0442651	488.086	565.753	497.896	436.156	419.657	419.825	Dcaf6	DDB1 and CUL4 associated factor 6 [Source:MGI Symbol;Acc:MGI:1921356]
ENSMUSG00000031727	2900.03	0.284325	0.0548285	5.18571	2.15E-07	5.07E-06	3279.6	3366.85	2904.39	2487.92	2610.23	2751.21	Pmfbp1	polyamine modulated factor 1 binding protein 1 [Source:MGI Symbol;Acc:MGI:1930136]
ENSMUSG00000055891	2411.5	0.284891	0.0468751	6.07767	1.22E-09	3.95E-08	2546.04	2664.16	2736.92	2181.37	2154.2	2186.31	Ubl4b	ubiquitin-like 4B [Source:MGI Symbol;Acc:MGI:1914841]
ENSMUSG00000026790	18057.3	0.285229	0.0214458	13.3	2.31E-40	3.98E-38	19389.3	20302.1	19816.2	16336	16067.5	16432.5	Odf2	outer dense fiber of sperm tails 2 [Source:MGI Symbol;Acc:MGI:1098824]
ENSMUSG00000042200	618.153	0.289854	0.106211	2.72905	0.00635176	0.0441736	620.812	668.114	751.37	507.172	633.191	528.261	Cdrt4	CMT1A duplicated region transcript 4 [Source:MGI Symbol;Acc:MGI:1913588]
ENSMUSG00000057176	613.904	0.29091	0.0980515	2.96692	0.00300804	0.0244851	687.888	688.863	648.773	489.418	594.795	573.687	Cfap119	cilia and flagella associated protein 119 [Source:MGI Symbol;Acc:MGI:2685012]
ENSMUSG00000036398	1296.93	0.293303	0.0749325	3.91423	9.07E-05	0.00128969	1321.54	1381.88	1582.7	1136.85	1252.24	1106.34	Ppp1r11	protein phosphatase 1, regulatory inhibitor subunit 11 [Source:MGI Symbol;Acc:MGI:1923747]
ENSMUSG00000038708	600.851	0.295785	0.0913391	3.23832	0.00120237	0.0117266	646.5	704.079	635.194	521.967	536.865	560.499	Golga4	golgin A4 [Source:MGI Symbol;Acc:MGI:1859646]
ENSMUSG00000079022	1236.3	0.296516	0.0813014	3.64712	0.000265194	0.00324117	1475.68	1459.34	1152.7	1125.01	1139.74	1065.31	Col22a1	collagen, type XXII, alpha 1 [Source:MGI Symbol;Acc:MGI:1916950]
ENSMUSG00000069971	1101.26	0.301964	0.0810233	3.72688	0.000193862	0.00247345	1370.07	1125.97	1151.19	943.92	959.89	1056.52	4933402J07Rik	RIKEN cDNA 4933402J07 gene [Source:MGI Symbol;Acc:MGI:3607717]
ENSMUSG00000060726	1158.46	0.302354	0.0720188	4.19827	2.69E-05	0.000434868	1304.42	1368.04	1164.77	1062.87	995.591	1055.06	Tmsb15a	thymosin beta 15a [Source:MGI Symbol;Acc:MGI:1925728]
ENSMUSG00000030216	368.426	0.302785	0.112747	2.68552	0.00724166	0.0489166	419.583	396.995	404.352	329.04	337.477	323.111	Wbp11	WW domain binding protein 11 [Source:MGI Symbol;Acc:MGI:1891823]
ENSMUSG00000060279	668.54	0.303671	0.0895295	3.39185	0.000694225	0.00742965	710.722	741.427	764.949	646.837	577.281	570.024	Ap2a1	adaptor-related protein complex 2, alpha 1 subunit [Source:MGI Symbol;Acc:MGI:101921]
ENSMUSG00000043629	621.5	0.304662	0.0985162	3.0925	0.00198477	0.0178066	737.838	666.731	656.317	550.373	613.656	504.083	1700019D03Rik	RIKEN cDNA 1700019D03 gene [Source:MGI Symbol;Acc:MGI:1914330]
ENSMUSG00000021374	819.55	0.304713	0.093365	3.26368	0.00109975	0.0110002	779.226	1011.16	926.387	732.647	689.774	778.105	Nup153	nucleoporin 153 [Source:MGI Symbol;Acc:MGI:2385621]
ENSMUSG00000021090	525.46	0.30478	0.102713	2.96729	0.00300437	0.0244794	609.394	621.083	511.474	491.785	456.706	462.32	Lrrc9	leucine rich repeat containing 9 [Source:MGI Symbol;Acc:MGI:1925507]
ENSMUSG00000043252	507.545	0.30577	0.104341	2.93049	0.00338425	0.0269371	568.007	553.303	562.773	465.746	491.733	403.706	Tmem64	transmembrane protein 64 [Source:MGI Symbol;Acc:MGI:2140359]
ENSMUSG00000027528	713.722	0.308556	0.0824847	3.74077	0.000183459	0.00236096	787.789	820.272	760.422	619.614	648.01	646.223	Fabp9	fatty acid binding protein 9, testis [Source:MGI Symbol;Acc:MGI:1194881]
ENSMUSG00000025423	492.069	0.309421	0.104169	2.97038	0.0029743	0.0242583	597.977	525.638	509.966	444.441	414.268	460.122	Pias2	protein inhibitor of activated STAT 2 [Source:MGI Symbol;Acc:MGI:1096566]
ENSMUSG00000079579	1434.24	0.309527	0.0706346	4.38209	1.18E-05	0.000206193	1662.63	1680.66	1416.74	1209.05	1301.41	1334.94	Gm6760	predicted gene 6760 [Source:MGI Symbol;Acc:MGI:3643199]
ENSMUSG00000027286	726.106	0.310912	0.0842466	3.6905	0.000223816	0.00281456	853.438	764.942	793.615	627.307	676.975	640.361	Lrrc57	leucine rich repeat containing 57 [Source:MGI Symbol;Acc:MGI:1913856]
ENSMUSG00000022391	1303.76	0.312119	0.0721441	4.32632	1.52E-05	0.000259897	1377.2	1438.59	1516.32	1143.36	1074.4	1272.66	Rangap1	RAN GTPase activating protein 1 [Source:MGI Symbol;Acc:MGI:103071]
ENSMUSG00000051736	460.505	0.314772	0.112304	2.80287	0.00506506	0.0369352	486.659	495.207	549.194	376.384	394.734	460.855	Fam229b	family with sequence similarity 229, member B [Source:MGI Symbol;Acc:MGI:1913587]
ENSMUSG00000044526	2283.72	0.321865	0.0554205	5.80768	6.33E-09	1.84E-07	2381.92	2693.2	2537.76	2060.05	2109.74	1919.62	Znrf4	zinc and ring finger 4 [Source:MGI Symbol;Acc:MGI:1341258]
ENSMUSG00000056912	884.925	0.323386	0.0985583	3.28117	0.00103379	0.0104671	1028.98	1051.28	870.563	772.89	898.592	687.253	1700017N19Rik	RIKEN cDNA 1700017N19 gene [Source:MGI Symbol;Acc:MGI:1913855]
ENSMUSG00000001948	2472.28	0.326769	0.0589014	5.54773	2.89E-08	7.76E-07	2501.8	2882.71	2868.18	2197.94	2061.91	2321.13	Spa17	sperm autoantigenic protein 17 [Source:MGI Symbol;Acc:MGI:1333778]
ENSMUSG00000015980	1156.25	0.329191	0.0717869	4.58567	4.53E-06	8.63E-05	1277.3	1386.03	1199.48	1067.61	1032.64	974.463	Lrrc27	leucine rich repeat containing 27 [Source:MGI Symbol;Acc:MGI:1923862]
ENSMUSG00000059891	2594.58	0.329765	0.0489005	6.74359	1.55E-11	6.45E-10	2934.23	2715.34	3020.57	2270.14	2268.71	2358.49	Tsks	testis-specific serine kinase substrate [Source:MGI Symbol;Acc:MGI:1347560]
ENSMUSG00000028789	2257.34	0.330194	0.055788	5.91873	3.24E-09	9.75E-08	2364.79	2498.16	2682.6	2008.57	2091.55	1898.37	Azin2	antizyme inhibitor 2 [Source:MGI Symbol;Acc:MGI:2442093]
ENSMUSG00000029477	933.71	0.331581	0.0849295	3.90419	9.45E-05	0.00133524	1084.64	1052.66	985.23	871.72	879.731	728.283	Morn3	MORN repeat containing 3 [Source:MGI Symbol;Acc:MGI:1922140]
ENSMUSG00000032534	1239.1	0.336022	0.0741343	4.53262	5.83E-06	0.000107918	1558.45	1307.18	1282.46	1100.75	1109.43	1076.31	Cep63	centrosomal protein 63 [Source:MGI Symbol;Acc:MGI:2158560]
ENSMUSG00000078632	493.225	0.33871	0.104829	3.23106	0.00123334	0.011974	522.338	569.903	559.755	426.095	402.817	478.439	Lrrc37a	leucine rich repeat containing 37A [Source:MGI Symbol;Acc:MGI:2685097]
ENSMUSG00000020486	440.802	0.338718	0.108103	3.13328	0.00172863	0.0158337	526.62	475.841	473.755	362.773	394.06	411.765	Septin4	septin 4 [Source:MGI Symbol;Acc:MGI:1270156]
ENSMUSG00000032058	331	0.338794	0.122896	2.75676	0.00583767	0.0413185	379.623	372.097	357.58	314.245	270.116	292.339	Ppp2r1b	protein phosphatase 2, regulatory subunit A, beta [Source:MGI Symbol;Acc:MGI:1920949]
ENSMUSG00000048707	352.371	0.344961	0.128099	2.69292	0.00708298	0.0481247	378.196	444.026	360.597	314.837	338.151	278.418	Tprn	taperin [Source:MGI Symbol;Acc:MGI:2139535]
ENSMUSG00000040829	716.874	0.346463	0.0919047	3.76981	0.000163373	0.00212564	766.381	735.894	906.773	658.081	615.003	619.114	Zmynd15	zinc finger, MYND-type containing 15 [Source:MGI Symbol;Acc:MGI:3603821]
ENSMUSG00000055762	5621.48	0.347951	0.0363064	9.58375	9.36E-22	7.73E-20	6212.4	6596.76	6078.85	5086.51	4860.07	4894.29	Eef1d	eukaryotic translation elongation factor 1 delta [Source:MGI Symbol;Acc:MGI:1913906]
ENSMUSG00000099398	1612.68	0.348026	0.059636	5.83584	5.35E-09	1.57E-07	1863.86	1816.22	1739.62	1467.66	1452.3	1336.41	Ms4a14	membrane-spanning 4-domains, subfamily A, member 14 [Source:MGI Symbol;Acc:MGI:2686122]
ENSMUSG00000037716	385.483	0.348661	0.128229	2.71906	0.00654677	0.0452252	426.719	430.193	437.545	291.757	327.373	399.31	Ccdc33	coiled-coil domain containing 33 [Source:MGI Symbol;Acc:MGI:1922464]
ENSMUSG00000046755	788.816	0.350654	0.091625	3.82705	0.000129686	0.00174506	842.02	991.796	817.756	656.305	752.419	672.599	Kif2b	kinesin family member 2B [Source:MGI Symbol;Acc:MGI:1920720]
ENSMUSG00000028937	912.66	0.350883	0.0826842	4.24366	2.20E-05	0.000362644	1070.36	984.88	1015.41	843.314	844.703	717.292	Acot7	acyl-CoA thioesterase 7 [Source:MGI Symbol;Acc:MGI:1917275]
ENSMUSG00000052075	614.382	0.351774	0.102031	3.44772	0.000565349	0.00630352	760.673	614.167	692.527	535.578	588.059	495.291	1700029F12Rik	RIKEN cDNA 1700029F12 gene [Source:MGI Symbol;Acc:MGI:1913729]
ENSMUSG00000056509	2435.74	0.352462	0.0569149	6.19279	5.91E-10	2.02E-08	2715.87	2557.65	2925.51	2272.51	2118.49	2024.39	Misfa	mitochondrial sheath formation associated [Source:MGI Symbol;Acc:MGI:3642801]
ENSMUSG00000041673	753.609	0.353806	0.088177	4.01245	6.01E-05	0.00090105	896.252	890.819	748.352	652.755	643.295	690.183	Lrrc18	leucine rich repeat containing 18 [Source:MGI Symbol;Acc:MGI:1914830]
ENSMUSG00000048655	412.587	0.353949	0.115843	3.05542	0.00224743	0.0194636	473.815	405.295	509.966	342.652	374.526	369.27	Ccdc169	coiled-coil domain containing 169 [Source:MGI Symbol;Acc:MGI:2444356]
ENSMUSG00000026509	11651.2	0.355502	0.0307002	11.5798	5.22E-31	6.74E-29	13292.5	12862.9	13078.1	9788.36	10136.4	10749.1	Capn2	calpain 2 [Source:MGI Symbol;Acc:MGI:88264]
ENSMUSG00000036574	774.31	0.359799	0.0842082	4.27273	1.93E-05	0.000321	784.934	926.783	899.229	668.141	689.774	676.995	Tex44	testis expressed 44 [Source:MGI Symbol;Acc:MGI:1919113]
ENSMUSG00000036377	1263.12	0.360307	0.069736	5.16673	2.38E-07	5.54E-06	1558.45	1359.74	1341.3	1106.07	1072.38	1140.78	Cracd	capping protein inhibiting regulator of actin [Source:MGI Symbol;Acc:MGI:2444817]
ENSMUSG00000032601	1090.61	0.365337	0.0925185	3.9488	7.85E-05	0.00113648	1190.25	1102.46	1391.09	832.662	1045.44	981.789	Prkar2a	protein kinase, cAMP dependent regulatory, type II alpha [Source:MGI Symbol;Acc:MGI:108025]
ENSMUSG00000005045	1770.52	0.365392	0.0581039	6.28859	3.20E-10	1.15E-08	1843.88	2040.31	2097.2	1544.6	1577.59	1519.58	Chd5	chromodomain helicase DNA binding protein 5 [Source:MGI Symbol;Acc:MGI:3036258]
ENSMUSG00000004364	751.477	0.36615	0.0954438	3.83628	0.00012491	0.00169459	924.795	817.506	796.633	630.858	738.273	600.797	Cul3	cullin 3 [Source:MGI Symbol;Acc:MGI:1347360]
ENSMUSG00000028059	1036.29	0.367242	0.076376	4.80834	1.52E-06	3.12E-05	1220.22	1127.36	1154.21	902.494	834.599	978.859	Arhgef2	Rho/Rac guanine nucleotide exchange factor 2 [Source:MGI Symbol;Acc:MGI:103264]
ENSMUSG00000005803	472.677	0.36825	0.112047	3.28657	0.00101416	0.0103106	500.931	514.572	582.387	404.199	373.852	460.122	Sqor	sulfide quinone oxidoreductase [Source:MGI Symbol;Acc:MGI:1929899]
ENSMUSG00000030230	589.575	0.368545	0.0992828	3.71207	0.000205573	0.00260897	643.646	686.096	662.352	461.603	516.657	567.093	Plcz1	phospholipase C, zeta 1 [Source:MGI Symbol;Acc:MGI:2150308]
ENSMUSG00000031971	517.491	0.369907	0.104455	3.54131	0.000398138	0.00465265	599.404	571.286	580.878	498.295	450.643	404.439	Ccsap	centriole, cilia and spindle associated protein [Source:MGI Symbol;Acc:MGI:1920670]
ENSMUSG00000028944	333.657	0.372032	0.136049	2.73454	0.0062467	0.0435529	343.944	331.982	454.141	287.023	307.165	277.685	Prkag2	protein kinase, AMP-activated, gamma 2 non-catalytic subunit [Source:MGI Symbol;Acc:MGI:1336153]
ENSMUSG00000032221	465.978	0.374034	0.10564	3.54067	0.000399118	0.0046575	566.58	496.59	514.492	392.363	391.366	434.478	Mns1	meiosis-specific nuclear structural protein 1 [Source:MGI Symbol;Acc:MGI:107933]
ENSMUSG00000040312	1335.12	0.374548	0.0647637	5.7833	7.32E-09	2.12E-07	1585.57	1522.97	1413.72	1204.31	1123.58	1160.56	Cchcr1	coiled-coil alpha-helical rod protein 1 [Source:MGI Symbol;Acc:MGI:2385321]
ENSMUSG00000074749	447.448	0.376971	0.104821	3.59632	0.000322757	0.00388154	492.368	539.471	484.317	375.201	402.817	390.518	Kiz	kizuna centrosomal protein [Source:MGI Symbol;Acc:MGI:2684960]
ENSMUSG00000044566	763.413	0.380352	0.0920577	4.13167	3.60E-05	0.000571111	782.08	926.783	882.633	718.444	667.545	602.995	Cage1	cancer antigen 1 [Source:MGI Symbol;Acc:MGI:1918463]
ENSMUSG00000020745	471.683	0.380598	0.111745	3.40597	0.000659303	0.00710191	569.434	569.903	460.176	381.119	431.109	418.36	Pafah1b1	platelet-activating factor acetylhydrolase, isoform 1b, subunit 1 [Source:MGI Symbol;Acc:MGI:109520]
ENSMUSG00000052926	354.642	0.38104	0.118807	3.20723	0.00134022	0.0128456	408.166	430.193	365.123	318.388	308.512	297.468	Rnaseh2a	ribonuclease H2, large subunit [Source:MGI Symbol;Acc:MGI:1916974]
ENSMUSG00000042628	348.434	0.382661	0.126844	3.01679	0.00255463	0.0215812	398.176	354.114	431.509	300.634	331.415	274.755	Zfyve1	zinc finger, FYVE domain containing 1 [Source:MGI Symbol;Acc:MGI:3026685]
ENSMUSG00000005417	1167.56	0.382765	0.0740025	5.17233	2.31E-07	5.40E-06	1374.35	1323.78	1264.35	935.043	1003.67	1104.15	Mprip	myosin phosphatase Rho interacting protein [Source:MGI Symbol;Acc:MGI:1349438]
ENSMUSG00000038594	847.483	0.384267	0.0807089	4.76114	1.92E-06	3.82E-05	887.689	954.448	1038.04	762.829	718.739	723.154	Cep85l	centrosomal protein 85-like [Source:MGI Symbol;Acc:MGI:3642684]
ENSMUSG00000034088	531.585	0.38596	0.100099	3.85579	0.000115357	0.00158057	665.053	549.154	592.948	467.521	462.768	452.063	Hdlbp	high density lipoprotein (HDL) binding protein [Source:MGI Symbol;Acc:MGI:99256]
ENSMUSG00000038932	583.3	0.386327	0.106182	3.63833	0.00027441	0.00333899	572.288	658.431	752.878	501.254	540.906	474.043	Tcfl5	transcription factor-like 5 (basic helix-loop-helix) [Source:MGI Symbol;Acc:MGI:2672878]
ENSMUSG00000000411	783.392	0.390299	0.0957084	4.078	4.54E-05	0.000697574	816.332	979.347	869.054	645.653	625.781	764.184	Tssk3	testis-specific serine kinase 3 [Source:MGI Symbol;Acc:MGI:1929914]
ENSMUSG00000033949	1279.74	0.391618	0.0695647	5.62955	1.81E-08	4.94E-07	1465.69	1528.5	1360.91	1075.3	1058.91	1189.14	Trim36	tripartite motif-containing 36 [Source:MGI Symbol;Acc:MGI:106264]
ENSMUSG00000022185	316.698	0.393936	0.125528	3.13824	0.00169968	0.0156204	355.361	366.564	357.58	289.39	282.915	248.378	Acin1	apoptotic chromatin condensation inducer 1 [Source:MGI Symbol;Acc:MGI:1891824]
ENSMUSG00000038015	38597.8	0.394699	0.0224493	17.5818	3.40E-69	1.28E-66	43529.6	43724.8	44288.6	33951.5	34325	31767.5	Prm2	protamine 2 [Source:MGI Symbol;Acc:MGI:97766]
ENSMUSG00000024059	1245.95	0.395242	0.0674483	5.85992	4.63E-09	1.37E-07	1397.18	1374.96	1474.07	1053.4	1027.25	1148.84	Clip4	CAP-GLY domain containing linker protein family, member 4 [Source:MGI Symbol;Acc:MGI:1919100]
ENSMUSG00000034623	587.761	0.395769	0.0936065	4.228	2.36E-05	0.000387269	649.355	699.929	653.299	473.439	519.351	531.192	Prss55	serine protease 55 [Source:MGI Symbol;Acc:MGI:1918287]
ENSMUSG00000003341	8776.78	0.396894	0.0276737	14.3419	1.20E-46	2.54E-44	9945.83	9707.71	10277.8	7519.4	7607.72	7602.27	Atp8b3	ATPase, class I, type 8B, member 3 [Source:MGI Symbol;Acc:MGI:1914581]
ENSMUSG00000047025	626.046	0.397602	0.0902747	4.40435	1.06E-05	0.000188922	732.13	706.845	697.054	563.985	554.379	501.885	Ccer1	coiled-coil glutamate-rich protein 1 [Source:MGI Symbol;Acc:MGI:1913966]
ENSMUSG00000027517	499.346	0.398996	0.100578	3.96702	7.28E-05	0.00106705	616.53	535.321	552.211	441.482	418.984	431.548	Ankrd60	ankyrin repeat domain 60 [Source:MGI Symbol;Acc:MGI:1917315]
ENSMUSG00000090100	1161.83	0.399781	0.0663592	6.0245	1.70E-09	5.33E-08	1360.08	1293.35	1311.12	981.203	976.057	1049.2	Ttbk2	tau tubulin kinase 2 [Source:MGI Symbol;Acc:MGI:2155779]
ENSMUSG00000038042	268.405	0.400248	0.149271	2.68135	0.00733258	0.0493739	256.888	293.251	366.632	230.802	244.519	218.338	Ptpdc1	protein tyrosine phosphatase domain containing 1 [Source:MGI Symbol;Acc:MGI:2145430]
ENSMUSG00000110622	3022.42	0.402561	0.041922	9.60262	7.79E-22	6.50E-20	3385.21	3412.5	3527.51	2592.67	2657.38	2559.25	Iqcn	IQ motif containing N [Source:MGI Symbol;Acc:MGI:3708784]
ENSMUSG00000037594	314.012	0.40313	0.141465	2.84968	0.00437631	0.0331109	311.119	414.978	347.018	305.96	248.561	256.438	Clba1	clathrin binding box of aftiphilin containing 1 [Source:MGI Symbol;Acc:MGI:2443738]
ENSMUSG00000002763	225.723	0.408914	0.150449	2.71796	0.00656852	0.0453376	269.732	246.22	256.492	181.091	216.901	183.902	Pex6	peroxisomal biogenesis factor 6 [Source:MGI Symbol;Acc:MGI:2385054]
ENSMUSG00000053293	395.001	0.409039	0.132007	3.09861	0.00194428	0.0175559	393.894	545.004	411.895	309.511	345.56	364.141	Pom121	nuclear pore membrane protein 121 [Source:MGI Symbol;Acc:MGI:2137624]
ENSMUSG00000000131	322.649	0.410351	0.126729	3.23802	0.00120361	0.0117266	346.798	351.348	407.369	294.716	274.832	260.834	Xpo6	exportin 6 [Source:MGI Symbol;Acc:MGI:2429950]
ENSMUSG00000057246	434.896	0.410935	0.149755	2.74405	0.0060686	0.042635	538.037	462.008	490.352	432.013	421.004	265.962	Tsbp1	testis expressed basic protein 1 [Source:MGI Symbol;Acc:MGI:3039565]
ENSMUSG00000028277	980.718	0.411468	0.0766378	5.36899	7.92E-08	2.01E-06	1103.19	1088.62	1166.28	804.847	806.981	914.383	Ube2j1	ubiquitin-conjugating enzyme E2J 1 [Source:MGI Symbol;Acc:MGI:1926245]
ENSMUSG00000031787	340.845	0.412182	0.121579	3.39024	0.00069831	0.00746369	388.186	365.18	414.913	311.878	275.505	289.408	Katnb1	katanin p80 (WD40-containing) subunit B 1 [Source:MGI Symbol;Acc:MGI:1921437]
ENSMUSG00000072295	524.022	0.412421	0.105212	3.91991	8.86E-05	0.00126401	656.49	589.268	549.194	466.93	408.206	474.043	C2cd6	C2 calcium dependent domain containing 6 [Source:MGI Symbol;Acc:MGI:1920713]
ENSMUSG00000001517	228.675	0.412617	0.152539	2.70499	0.00683055	0.0467169	282.576	273.885	226.316	184.641	189.957	214.675	Foxm1	forkhead box M1 [Source:MGI Symbol;Acc:MGI:1347487]
ENSMUSG00000031930	572.41	0.414535	0.0984718	4.20969	2.56E-05	0.000414277	625.093	686.096	650.282	481.133	453.338	538.519	Wwp2	WW domain containing E3 ubiquitin protein ligase 2 [Source:MGI Symbol;Acc:MGI:1914144]
ENSMUSG00000024392	3629.67	0.414992	0.0416025	9.97517	1.96E-23	1.78E-21	4110.2	3974.1	4361.87	3118.19	3068.28	3145.39	Bag6	BCL2-associated athanogene 6 [Source:MGI Symbol;Acc:MGI:1919439]
ENSMUSG00000028132	250.72	0.41624	0.146765	2.8361	0.00456687	0.0340318	288.285	323.683	247.439	217.782	200.735	226.398	Tlcd4	TLC domain containing 4 [Source:MGI Symbol;Acc:MGI:1923195]
ENSMUSG00000040725	454.022	0.418813	0.110982	3.77369	0.000160849	0.00210274	490.941	528.405	540.141	427.279	389.345	348.022	Hnrnpul1	heterogeneous nuclear ribonucleoprotein U-like 1 [Source:MGI Symbol;Acc:MGI:2443517]
ENSMUSG00000028141	18363.8	0.418938	0.0197825	21.1772	1.55E-99	1.60E-96	21076.2	20840.2	21121.3	15917	15464	15764.3	Oaz3	ornithine decarboxylase antizyme 3 [Source:MGI Symbol;Acc:MGI:1858170]
ENSMUSG00000021693	481.185	0.421117	0.101921	4.13181	3.60E-05	0.000571111	522.338	597.568	532.597	411.3	420.331	402.973	Kif2a	kinesin family member 2A [Source:MGI Symbol;Acc:MGI:108390]
ENSMUSG00000020020	582.864	0.422487	0.0950121	4.44667	8.72E-06	0.000156302	659.345	698.546	644.247	498.887	462.768	533.39	Usp44	ubiquitin specific peptidase 44 [Source:MGI Symbol;Acc:MGI:3045318]
ENSMUSG00000027177	282.432	0.423824	0.142226	2.97994	0.00288304	0.0236607	323.964	278.035	369.65	260.392	222.964	239.586	Hipk3	homeodomain interacting protein kinase 3 [Source:MGI Symbol;Acc:MGI:1314882]
ENSMUSG00000004535	687.534	0.423901	0.0853278	4.96791	6.77E-07	1.48E-05	784.934	762.175	816.247	581.739	562.462	617.648	Tax1bp1	Tax1 (human T cell leukemia virus type I) binding protein 1 [Source:MGI Symbol;Acc:MGI:1289308]
ENSMUSG00000044581	537.411	0.426153	0.104902	4.06238	4.86E-05	0.00074046	699.305	605.867	543.159	458.644	474.219	443.271	4932415D10Rik	RIKEN cDNA 4932415D10 gene [Source:MGI Symbol;Acc:MGI:3045298]
ENSMUSG00000042548	285.354	0.42961	0.150837	2.84817	0.00439708	0.0331769	261.169	349.964	371.158	224.884	232.394	272.556	Asxl1	ASXL transcriptional regulator 1 [Source:MGI Symbol;Acc:MGI:2684063]
ENSMUSG00000052056	832.544	0.43139	0.0843889	5.11192	3.19E-07	7.32E-06	864.855	1024.99	979.195	750.401	695.162	680.659	Zfp217	zinc finger protein 217 [Source:MGI Symbol;Acc:MGI:2685408]
ENSMUSG00000069237	420.691	0.432759	0.112408	3.8499	0.000118168	0.00161107	543.745	455.092	451.124	366.916	348.255	359.013	Fam8a1	family with sequence similarity 8, member A1 [Source:MGI Symbol;Acc:MGI:2145496]
ENSMUSG00000022501	26550.8	0.432936	0.0168845	25.641	5.33E-145	8.81E-142	30629.6	30792.7	30091	22628	22722.8	22440.5	Prm1	protamine 1 [Source:MGI Symbol;Acc:MGI:97765]
ENSMUSG00000028896	731.362	0.433867	0.0850092	5.10376	3.33E-07	7.62E-06	817.759	867.303	835.861	621.389	581.323	664.54	Rcc1	regulator of chromosome condensation 1 [Source:MGI Symbol;Acc:MGI:1913989]
ENSMUSG00000029502	309.571	0.435457	0.127156	3.42458	0.000615754	0.00672931	369.633	329.216	369.65	279.921	261.36	247.645	Golga3	golgin A3 [Source:MGI Symbol;Acc:MGI:96958]
ENSMUSG00000031770	788.101	0.435956	0.0936423	4.65554	3.23E-06	6.24E-05	991.871	874.219	853.966	739.157	672.26	597.133	Herpud1	homocysteine-inducible, endoplasmic reticulum stress-inducible, ubiquitin-like domain member 1 [Source:MGI Symbol;Acc:MGI:1927406]
ENSMUSG00000029828	1188.65	0.437627	0.0683674	6.4011	1.54E-10	5.90E-09	1434.29	1361.13	1308.11	1067.61	984.14	976.661	Spmip4	sperm microtubule inner protein 4 [Source:MGI Symbol;Acc:MGI:1918071]
ENSMUSG00000050050	276.113	0.438157	0.160248	2.73425	0.00625233	0.0435555	241.189	369.33	342.492	215.415	264.054	224.2	Ccdc158	coiled-coil domain containing 158 [Source:MGI Symbol;Acc:MGI:2444555]
ENSMUSG00000050592	407.04	0.440078	0.140273	3.1373	0.00170511	0.0156368	496.649	515.955	393.79	418.402	303.123	314.319	Fam78a	family with sequence similarity 78, member A [Source:MGI Symbol;Acc:MGI:2443569]
ENSMUSG00000030301	2802.73	0.441168	0.0439508	10.0378	1.04E-23	9.66E-22	3275.32	3116.48	3292.15	2358.91	2346.17	2427.36	Ccdc91	coiled-coil domain containing 91 [Source:MGI Symbol;Acc:MGI:1914265]
ENSMUSG00000022867	455.459	0.443484	0.113887	3.89406	9.86E-05	0.00138749	486.659	605.867	481.299	376.976	373.852	408.102	Usp25	ubiquitin specific peptidase 25 [Source:MGI Symbol;Acc:MGI:1353655]
ENSMUSG00000030688	1808.11	0.444682	0.0594299	7.48247	7.29E-14	3.59E-12	2067.94	2090.1	2097.2	1557.62	1625.41	1410.41	Stard10	StAR related lipid transfer domain containing 10 [Source:MGI Symbol;Acc:MGI:1860093]
ENSMUSG00000036427	1457.66	0.444752	0.0606886	7.32843	2.33E-13	1.09E-11	1598.41	1755.36	1686.81	1197.21	1242.13	1266.07	Gpi1	glucose-6-phosphate isomerase 1 [Source:MGI Symbol;Acc:MGI:95797]
ENSMUSG00000061950	1243.66	0.445907	0.0750087	5.94474	2.77E-09	8.38E-08	1492.8	1347.29	1465.02	1117.91	1095.96	942.958	Ppp4r1	protein phosphatase 4, regulatory subunit 1 [Source:MGI Symbol;Acc:MGI:1917601]
ENSMUSG00000079173	252.803	0.448646	0.144132	3.11274	0.00185359	0.0168105	276.868	264.202	334.948	223.108	208.145	209.546	Zan	zonadhesin [Source:MGI Symbol;Acc:MGI:106656]
ENSMUSG00000028678	680.144	0.448901	0.0864754	5.19108	2.09E-07	4.96E-06	743.547	835.488	775.51	554.516	581.996	589.806	Kif2c	kinesin family member 2C [Source:MGI Symbol;Acc:MGI:1921054]
ENSMUSG00000048000	251.524	0.449049	0.14602	3.07525	0.00210323	0.0185849	275.441	286.335	309.299	218.374	185.242	234.457	Gigyf2	GRB10 interacting GYF protein 2 [Source:MGI Symbol;Acc:MGI:2138584]
ENSMUSG00000007033	698.263	0.44949	0.0892778	5.03473	4.79E-07	1.07E-05	737.838	860.387	820.773	624.348	564.483	581.747	Hspa1l	heat shock protein 1-like [Source:MGI Symbol;Acc:MGI:96231]
ENSMUSG00000040105	244.626	0.451558	0.140504	3.21386	0.00130966	0.0125965	279.722	286.335	282.141	220.741	206.124	192.695	Plpp6	phospholipid phosphatase 6 [Source:MGI Symbol;Acc:MGI:1921661]
ENSMUSG00000029165	516.676	0.452896	0.0950352	4.76556	1.88E-06	3.75E-05	587.987	586.502	617.089	436.156	437.845	434.478	Agbl5	ATP/GTP binding protein-like 5 [Source:MGI Symbol;Acc:MGI:2441745]
ENSMUSG00000031453	192.979	0.455931	0.158451	2.87742	0.00400945	0.0307577	235.48	201.956	232.351	159.786	166.381	161.922	Rasa3	RAS p21 protein activator 3 [Source:MGI Symbol;Acc:MGI:1197013]
ENSMUSG00000022194	425.926	0.456988	0.11901	3.8399	0.000123085	0.00167258	479.523	467.541	532.597	408.933	323.331	343.626	Pabpn1	poly(A) binding protein, nuclear 1 [Source:MGI Symbol;Acc:MGI:1859158]
ENSMUSG00000033794	288.976	0.457015	0.130836	3.49304	0.000477558	0.00543469	321.109	367.947	313.825	249.147	237.11	244.715	Lpcat2b	lysophosphatidylcholine acyltransferase 2B [Source:MGI Symbol;Acc:MGI:1918152]
ENSMUSG00000047648	274.236	0.457164	0.140725	3.24863	0.00115964	0.0113859	276.868	343.048	331.93	234.352	210.839	248.378	Fbxo30	F-box protein 30 [Source:MGI Symbol;Acc:MGI:1919115]
ENSMUSG00000034135	191.547	0.459815	0.169854	2.70713	0.00678686	0.0464951	189.811	231.004	244.421	142.032	177.159	164.853	Sik3	SIK family kinase 3 [Source:MGI Symbol;Acc:MGI:2446296]
ENSMUSG00000002658	419.248	0.459938	0.116157	3.95964	7.51E-05	0.00109377	472.388	499.356	484.317	353.304	311.206	394.914	Gtf2f1	general transcription factor IIF, polypeptide 1 [Source:MGI Symbol;Acc:MGI:1923848]
ENSMUSG00000055322	1108	0.460525	0.0833865	5.52278	3.34E-08	8.78E-07	1168.84	1377.73	1305.09	1030.32	924.189	841.848	Tns1	tensin 1 [Source:MGI Symbol;Acc:MGI:104552]
ENSMUSG00000032050	173.055	0.462427	0.168358	2.74669	0.00602001	0.0423296	191.239	218.555	191.614	145.583	136.742	154.595	Rdx	radixin [Source:MGI Symbol;Acc:MGI:97887]
ENSMUSG00000119940	777.761	0.464554	0.0841044	5.52354	3.32E-08	8.77E-07	857.719	859.004	989.756	642.694	676.301	641.094	Gm56924	predicted gene, 56924 [Source:MGI Symbol;Acc:MGI:7337761]
ENSMUSG00000028760	1101.48	0.465222	0.0755019	6.16172	7.20E-10	2.42E-08	1207.37	1354.21	1270.39	939.185	850.092	987.651	Eif4g3	eukaryotic translation initiation factor 4 gamma, 3 [Source:MGI Symbol;Acc:MGI:1923935]
ENSMUSG00000031029	214.395	0.465961	0.158442	2.94089	0.00327274	0.0262518	226.917	226.854	292.702	180.499	171.096	188.298	Eif3f	eukaryotic translation initiation factor 3, subunit F [Source:MGI Symbol;Acc:MGI:1913335]
ENSMUSG00000032540	589.761	0.468052	0.108078	4.33067	1.49E-05	0.000255343	723.567	640.449	689.51	441.482	573.913	469.647	Abhd5	abhydrolase domain containing 5 [Source:MGI Symbol;Acc:MGI:1914719]
ENSMUSG00000056763	219.789	0.469291	0.152039	3.08666	0.00202419	0.018119	282.576	243.454	239.895	192.927	190.631	169.249	Cspp1	centrosome and spindle pole associated protein 1 [Source:MGI Symbol;Acc:MGI:2681832]
ENSMUSG00000094445	1298.45	0.471198	0.0851832	5.53158	3.17E-08	8.40E-07	1584.14	1477.32	1462	931.492	1094.61	1241.16	Ccdc179	coiled-coil domain containing 179 [Source:MGI Symbol;Acc:MGI:1922779]
ENSMUSG00000030595	201.661	0.471671	0.163319	2.88803	0.00387666	0.0298499	201.229	233.771	268.562	181.091	167.055	158.259	Nfkbib	nuclear factor of kappa light polypeptide gene enhancer in B cells inhibitor, beta [Source:MGI Symbol;Acc:MGI:104752]
ENSMUSG00000030030	2237.73	0.473554	0.0536879	8.82049	1.14E-18	7.98E-17	2760.11	2582.54	2460.81	1858.25	1811.33	1953.32	1700003E16Rik	RIKEN cDNA 1700003E16 gene [Source:MGI Symbol;Acc:MGI:1919087]
ENSMUSG00000001558	1056.3	0.474519	0.0801961	5.91698	3.28E-09	9.82E-08	1364.36	1095.54	1226.63	923.799	870.974	856.501	Klhl10	kelch-like 10 [Source:MGI Symbol;Acc:MGI:2181067]
ENSMUSG00000030638	338.295	0.475081	0.142235	3.34011	0.000837463	0.00881416	450.98	385.929	342.492	250.923	266.075	333.369	Sh3gl3	SH3-domain GRB2-like 3 [Source:MGI Symbol;Acc:MGI:700011]
ENSMUSG00000022155	1658.66	0.475423	0.0588012	8.08527	6.20E-16	3.74E-14	1925.23	1960.08	1901.06	1299.59	1422.66	1443.38	Mroh2b	maestro heat-like repeat family member 2B [Source:MGI Symbol;Acc:MGI:1921905]
ENSMUSG00000021838	885.336	0.475643	0.0758265	6.27277	3.55E-10	1.26E-08	1004.72	1080.32	1004.84	742.116	768.586	711.431	Samd4	sterile alpha motif domain containing 4 [Source:MGI Symbol;Acc:MGI:1921730]
ENSMUSG00000007029	3753.1	0.47576	0.0398398	11.9418	7.16E-33	1.00E-30	4382.79	4404.3	4309.06	3012.85	3198.29	3211.33	Vars1	valyl-tRNA synthetase 1 [Source:MGI Symbol;Acc:MGI:90675]
ENSMUSG00000026918	557.067	0.477293	0.109748	4.349	1.37E-05	0.000236387	730.702	564.369	650.282	442.074	514.636	440.34	Brd3	bromodomain containing 3 [Source:MGI Symbol;Acc:MGI:1914632]
ENSMUSG00000022388	200.564	0.478111	0.166068	2.87901	0.0039892	0.0306593	216.927	203.339	280.632	169.255	160.318	172.912	Ttll8	tubulin tyrosine ligase-like family, member 8 [Source:MGI Symbol;Acc:MGI:1922902]
ENSMUSG00000021902	685.96	0.478143	0.096695	4.94486	7.62E-07	1.64E-05	853.438	828.572	712.141	534.987	555.052	631.569	Phf7	PHD finger protein 7 [Source:MGI Symbol;Acc:MGI:1919088]
ENSMUSG00000034731	475.994	0.480506	0.124043	3.87371	0.000107192	0.00148594	445.272	630.766	586.913	368.691	392.039	432.28	Dgkh	diacylglycerol kinase, eta [Source:MGI Symbol;Acc:MGI:2444188]
ENSMUSG00000018677	1327.72	0.481868	0.0623889	7.72362	1.13E-14	5.99E-13	1498.51	1520.2	1624.95	1134.48	1106.74	1081.43	Slc25a39	solute carrier family 25, member 39 [Source:MGI Symbol;Acc:MGI:1196386]
ENSMUSG00000020064	225.013	0.482793	0.16024	3.01294	0.00258734	0.0217684	216.927	298.784	271.579	206.538	181.874	174.378	Herc4	hect domain and RLD 4 [Source:MGI Symbol;Acc:MGI:1914595]
ENSMUSG00000032244	393.076	0.483991	0.137953	3.50837	0.000450855	0.00518797	485.232	365.18	525.053	292.941	369.137	320.913	Fem1b	fem 1 homolog b [Source:MGI Symbol;Acc:MGI:1335087]
ENSMUSG00000041842	307.758	0.484134	0.135761	3.56608	0.000362362	0.00427691	411.02	325.066	340.983	260.983	275.505	232.992	Fhdc1	FH2 domain containing 1 [Source:MGI Symbol;Acc:MGI:2684972]
ENSMUSG00000024855	179.851	0.484197	0.172501	2.80693	0.00500165	0.0366344	205.51	233.771	190.106	169.255	135.395	145.07	Pacs1	phosphofurin acidic cluster sorting protein 1 [Source:MGI Symbol;Acc:MGI:1277113]
ENSMUSG00000039977	480.992	0.485188	0.118377	4.09868	4.16E-05	0.000651404	470.961	594.801	618.597	436.156	403.491	361.943	Deup1	deuterosome assembly protein 1 [Source:MGI Symbol;Acc:MGI:2443026]
ENSMUSG00000044340	1476.36	0.487218	0.0604614	8.05834	7.73E-16	4.63E-14	1619.82	1747.06	1802.99	1206.68	1236.07	1245.55	Phlpp1	PH domain and leucine rich repeat protein phosphatase 1 [Source:MGI Symbol;Acc:MGI:2138327]
ENSMUSG00000036779	786.932	0.488393	0.0908861	5.37368	7.71E-08	1.97E-06	871.991	906.034	977.686	612.512	617.024	736.342	Tent4b	terminal nucleotidyltransferase 4B [Source:MGI Symbol;Acc:MGI:1917820]
ENSMUSG00000091844	499.312	0.489049	0.120203	4.06852	4.73E-05	0.000724452	568.007	589.268	591.44	407.158	346.908	493.093	Ccdc168	coiled-coil domain containing 168 [Source:MGI Symbol;Acc:MGI:3647616]
ENSMUSG00000060002	239.36	0.491143	0.147283	3.33469	0.00085395	0.0089308	246.897	291.868	300.246	195.886	186.589	214.675	Chpt1	choline phosphotransferase 1 [Source:MGI Symbol;Acc:MGI:2384841]
ENSMUSG00000029310	322.044	0.491726	0.139073	3.53573	0.000406646	0.00473001	376.768	419.127	333.439	278.737	297.061	227.13	Nudt9	nudix hydrolase 9 [Source:MGI Symbol;Acc:MGI:1921417]
ENSMUSG00000024404	309.682	0.491917	0.127498	3.85824	0.000114206	0.00157	338.235	388.696	359.088	272.228	240.478	259.368	Riok3	RIO kinase 3 [Source:MGI Symbol;Acc:MGI:1914128]
ENSMUSG00000029601	170.925	0.493546	0.176029	2.80378	0.00505079	0.0368636	218.354	171.524	209.72	138.481	130.68	156.793	Iqcd	IQ motif containing D [Source:MGI Symbol;Acc:MGI:1922982]
ENSMUSG00000056211	307.481	0.493755	0.141862	3.48054	0.000500411	0.00567912	301.129	423.277	354.562	273.411	257.318	235.19	R3hdm1	R3H domain containing 1 [Source:MGI Symbol;Acc:MGI:2448514]
ENSMUSG00000064225	229.137	0.494367	0.147831	3.34414	0.000825379	0.00874267	271.159	268.352	264.036	169.846	201.409	200.021	Paqr9	progestin and adipoQ receptor family member IX [Source:MGI Symbol;Acc:MGI:1922802]
ENSMUSG00000032525	225.903	0.495285	0.156556	3.16362	0.00155821	0.0145963	222.636	279.418	291.193	189.376	202.082	170.714	Nktr	natural killer tumor recognition sequence [Source:MGI Symbol;Acc:MGI:97346]
ENSMUSG00000033767	553.254	0.49532	0.099988	4.9538	7.28E-07	1.57E-05	636.51	715.145	589.931	479.357	439.192	459.39	Tmem131l	transmembrane 131 like [Source:MGI Symbol;Acc:MGI:2443399]
ENSMUSG00000008393	322.028	0.495492	0.123863	4.00032	6.33E-05	0.000945081	398.176	373.48	359.088	284.655	264.728	252.041	Carhsp1	calcium regulated heat stable protein 1 [Source:MGI Symbol;Acc:MGI:1196368]
ENSMUSG00000061099	8233.89	0.497065	0.0288111	17.2526	1.07E-66	3.69E-64	9631.86	9913.81	9369.49	6938.25	6803.43	6746.51	Gapdhs	glyceraldehyde-3-phosphate dehydrogenase, spermatogenic [Source:MGI Symbol;Acc:MGI:95653]
ENSMUSG00000050721	463.482	0.497229	0.107703	4.61665	3.90E-06	7.48E-05	489.514	562.986	574.843	358.63	401.47	393.448	Plekho2	pleckstrin homology domain containing, family O member 2 [Source:MGI Symbol;Acc:MGI:2143132]
ENSMUSG00000040489	630.571	0.498407	0.0979306	5.08939	3.59E-07	8.18E-06	662.199	713.761	840.387	539.129	518.004	509.944	Sox30	SRY (sex determining region Y)-box 30 [Source:MGI Symbol;Acc:MGI:1341157]
ENSMUSG00000066383	260.446	0.498471	0.160475	3.10622	0.00189497	0.017167	291.139	257.286	366.632	184.641	243.172	219.804	Iqcf1	IQ motif containing F1 [Source:MGI Symbol;Acc:MGI:1921517]
ENSMUSG00000018509	240.699	0.498842	0.15115	3.3003	0.000965812	0.00993715	325.391	251.753	268.562	191.151	217.575	189.764	Cenpv	centromere protein V [Source:MGI Symbol;Acc:MGI:1920389]
ENSMUSG00000003810	372.117	0.49978	0.111932	4.46502	8.01E-06	0.000143798	422.437	434.343	451.124	308.327	305.818	310.656	Mast2	microtubule associated serine/threonine kinase 2 [Source:MGI Symbol;Acc:MGI:894676]
ENSMUSG00000074771	1500.01	0.500751	0.0656565	7.62682	2.41E-14	1.23E-12	1866.72	1813.45	1591.76	1252.84	1199.69	1275.59	Ankef1	ankyrin repeat and EF-hand domain containing 1 [Source:MGI Symbol;Acc:MGI:2441685]
ENSMUSG00000038351	193.589	0.503887	0.183783	2.74175	0.0061112	0.042825	231.199	172.907	277.614	156.235	178.506	145.07	Sgsm2	small G protein signaling modulator 2 [Source:MGI Symbol;Acc:MGI:2144695]
ENSMUSG00000021097	2443.63	0.504822	0.046737	10.8013	3.39E-27	3.64E-25	2899.98	2770.67	2930.04	2010.34	1982.43	2068.35	Clmn	calmin [Source:MGI Symbol;Acc:MGI:2136957]
ENSMUSG00000020696	300.11	0.505679	0.1329	3.80496	0.000141824	0.00188688	321.109	334.749	401.334	259.8	241.151	242.517	Rffl	ring finger and FYVE like domain containing protein [Source:MGI Symbol;Acc:MGI:1914588]
ENSMUSG00000003346	227.607	0.50655	0.164678	3.076	0.00209795	0.0185581	296.848	276.652	227.825	179.315	221.617	163.387	Abhd17a	abhydrolase domain containing 17A [Source:MGI Symbol;Acc:MGI:106388]
ENSMUSG00000059920	334.164	0.507418	0.149189	3.40117	0.000670976	0.00719949	483.805	354.114	339.474	316.613	247.214	263.764	4930453N24Rik	RIKEN cDNA 4930453N24 gene [Source:MGI Symbol;Acc:MGI:1914859]
ENSMUSG00000063889	238.311	0.507802	0.149692	3.39231	0.000693063	0.00742683	258.315	255.903	325.895	204.763	196.693	188.298	Crem	cAMP responsive element modulator [Source:MGI Symbol;Acc:MGI:88495]
ENSMUSG00000026150	339.68	0.508103	0.156237	3.25212	0.00114547	0.0113173	323.964	456.475	416.422	271.044	340.845	229.328	Mff	mitochondrial fission factor [Source:MGI Symbol;Acc:MGI:1922984]
ENSMUSG00000071657	183.241	0.508371	0.170571	2.9804	0.00287869	0.0236607	196.947	240.687	208.211	162.745	158.971	131.882	Bscl2	BSCL2 lipid droplet biogenesis associated, seipin [Source:MGI Symbol;Acc:MGI:1298392]
ENSMUSG00000032497	438.039	0.508927	0.112079	4.5408	5.60E-06	0.000104231	568.007	485.524	490.352	387.629	334.783	361.943	Lrrfip2	leucine rich repeat (in FLII) interacting protein 2 [Source:MGI Symbol;Acc:MGI:1918518]
ENSMUSG00000028035	290.061	0.512948	0.180896	2.83559	0.00457412	0.0340323	259.742	294.634	469.229	208.905	266.075	241.784	Dnajb4	DnaJ heat shock protein family (Hsp40) member B4 [Source:MGI Symbol;Acc:MGI:1914285]
ENSMUSG00000030779	217.869	0.514147	0.168157	3.05754	0.00223161	0.0193876	224.063	284.951	259.509	181.682	148.194	208.813	Rbbp6	retinoblastoma binding protein 6, ubiquitin ligase [Source:MGI Symbol;Acc:MGI:894835]
ENSMUSG00000034813	709.828	0.514188	0.0910082	5.64991	1.61E-08	4.44E-07	854.865	834.105	816.247	571.678	648.684	533.39	Grip1	glutamate receptor interacting protein 1 [Source:MGI Symbol;Acc:MGI:1921303]
ENSMUSG00000078796	559.169	0.514608	0.101872	5.0515	4.38E-07	9.87E-06	592.269	740.043	641.229	471.072	471.525	438.875	Zfp541	zinc finger protein 541 [Source:MGI Symbol;Acc:MGI:3647699]
ENSMUSG00000040731	860.358	0.515002	0.085652	6.01273	1.82E-09	5.69E-08	1020.41	1040.21	977.686	780.583	707.287	635.965	Eif4h	eukaryotic translation initiation factor 4H [Source:MGI Symbol;Acc:MGI:1341822]
ENSMUSG00000043633	391.704	0.517547	0.158815	3.25881	0.00111879	0.0111367	616.53	363.797	402.843	295.308	310.533	361.211	Fam221b	family with sequence similarity 221, member B [Source:MGI Symbol;Acc:MGI:2441678]
ENSMUSG00000092519	1236.24	0.523346	0.0642243	8.14872	3.68E-16	2.23E-14	1465.69	1502.22	1406.18	1019.08	1045.44	978.859	Actl9	actin-like 9 [Source:MGI Symbol;Acc:MGI:1916731]
ENSMUSG00000029094	361.876	0.523978	0.119613	4.3806	1.18E-05	0.000206732	389.613	477.224	413.404	292.941	298.408	299.666	Afap1	actin filament associated protein 1 [Source:MGI Symbol;Acc:MGI:1917542]
ENSMUSG00000045521	1263.38	0.524789	0.0693164	7.57092	3.71E-14	1.89E-12	1457.12	1431.67	1584.21	1016.71	1108.76	981.789	Tssk2	testis-specific serine kinase 2 [Source:MGI Symbol;Acc:MGI:1347559]
ENSMUSG00000020694	187.423	0.525262	0.166787	3.1493	0.00163661	0.01521	232.626	186.74	244.421	155.643	146.846	158.259	Tlk2	tousled-like kinase 2 (Arabidopsis) [Source:MGI Symbol;Acc:MGI:1346023]
ENSMUSG00000027030	681.571	0.527784	0.0867671	6.08277	1.18E-09	3.84E-08	826.322	816.123	770.984	530.844	551.684	593.47	Stk39	serine/threonine kinase 39 [Source:MGI Symbol;Acc:MGI:1858416]
ENSMUSG00000075302	272.462	0.527892	0.149603	3.52862	0.000417735	0.00484057	269.732	373.48	321.369	202.395	221.617	246.18	Erich2	glutamate rich 2 [Source:MGI Symbol;Acc:MGI:1913998]
ENSMUSG00000070738	350.398	0.533266	0.124227	4.29269	1.77E-05	0.000295827	385.331	445.409	411.895	276.37	265.401	317.983	Dgkd	diacylglycerol kinase, delta [Source:MGI Symbol;Acc:MGI:2138334]
ENSMUSG00000033983	633.588	0.533522	0.117144	4.55441	5.25E-06	9.84E-05	840.593	814.739	591.44	490.01	491.06	573.687	Coil	coilin [Source:MGI Symbol;Acc:MGI:104842]
ENSMUSG00000020029	933.188	0.535885	0.071344	7.51128	5.86E-14	2.95E-12	1076.07	1109.37	1128.56	772.298	753.766	759.055	Nudt4	nudix hydrolase 4 [Source:MGI Symbol;Acc:MGI:1918457]
ENSMUSG00000024513	561.852	0.536574	0.0934437	5.74222	9.34E-09	2.65E-07	656.49	633.532	706.106	463.379	466.136	445.469	Mbd2	methyl-CpG binding domain protein 2 [Source:MGI Symbol;Acc:MGI:1333813]
ENSMUSG00000026842	498.004	0.537435	0.103337	5.20081	1.98E-07	4.75E-06	646.5	578.202	544.668	427.279	400.123	391.25	Abl1	c-abl oncogene 1, non-receptor tyrosine kinase [Source:MGI Symbol;Acc:MGI:87859]
ENSMUSG00000034563	396.994	0.53748	0.120339	4.46638	7.96E-06	0.000143198	530.901	475.841	402.843	316.613	317.269	338.498	Ccpg1	cell cycle progression 1 [Source:MGI Symbol;Acc:MGI:1196419]
ENSMUSG00000043060	1429.22	0.538593	0.0737807	7.29991	2.88E-13	1.34E-11	1538.47	1655.76	1884.46	1117.91	1130.99	1247.75	Fscb	fibrous sheath CABYR binding protein [Source:MGI Symbol;Acc:MGI:3646964]
ENSMUSG00000013787	1235.14	0.539745	0.0788634	6.84404	7.70E-12	3.26E-10	1518.49	1593.51	1276.42	972.326	976.73	1073.37	Ehmt2	euchromatic histone lysine N-methyltransferase 2 [Source:MGI Symbol;Acc:MGI:2148922]
ENSMUSG00000032300	242.326	0.540208	0.155072	3.4836	0.000494718	0.00562223	261.169	309.85	291.193	231.394	185.242	175.11	1700017B05Rik	RIKEN cDNA 1700017B05 gene [Source:MGI Symbol;Acc:MGI:1921461]
ENSMUSG00000061923	9334.29	0.540941	0.0299031	18.0898	3.83E-73	1.76E-70	10745	11012.1	11433.5	7467.91	7497.25	7849.92	Odf1	outer dense fiber of sperm tails 1 [Source:MGI Symbol;Acc:MGI:97424]
ENSMUSG00000031452	1759.26	0.541654	0.055705	9.72361	2.39E-22	2.06E-20	1996.59	2084.57	2177.16	1472.4	1391	1433.85	1700029H14Rik	RIKEN cDNA 1700029H14 gene [Source:MGI Symbol;Acc:MGI:1913751]
ENSMUSG00000035027	415.12	0.542701	0.11524	4.70931	2.49E-06	4.89E-05	476.669	450.942	549.194	316.021	338.151	359.745	Map2k2	mitogen-activated protein kinase kinase 2 [Source:MGI Symbol;Acc:MGI:1346867]
ENSMUSG00000022177	188.991	0.542822	0.175382	3.09508	0.00196763	0.0176894	235.48	248.987	187.088	131.971	158.971	171.447	Haus4	HAUS augmin-like complex, subunit 4 [Source:MGI Symbol;Acc:MGI:1261794]
ENSMUSG00000024207	949.515	0.543235	0.0895115	6.06889	1.29E-09	4.16E-08	984.736	1105.22	1290	814.316	734.232	768.58	Acsbg2	acyl-CoA synthetase bubblegum family member 2 [Source:MGI Symbol;Acc:MGI:3587728]
ENSMUSG00000056508	791.633	0.544734	0.105487	5.16398	2.42E-07	5.61E-06	789.216	1009.78	1019.93	660.448	710.655	559.767	1700001K19Rik	RIKEN cDNA 1700001K19 gene [Source:MGI Symbol;Acc:MGI:1913573]
ENSMUSG00000027546	302.411	0.545999	0.127369	4.28676	1.81E-05	0.00030321	346.798	384.546	345.509	256.841	232.394	248.378	Atp9a	ATPase, class II, type 9A [Source:MGI Symbol;Acc:MGI:1330826]
ENSMUSG00000020401	586.244	0.548281	0.0937193	5.85025	4.91E-09	1.45E-07	680.752	679.18	728.738	445.033	503.858	479.905	Garin3	golgi associated RAB2 interactor 3 [Source:MGI Symbol;Acc:MGI:3650836]
ENSMUSG00000037742	586.772	0.551478	0.093331	5.90884	3.45E-09	1.03E-07	715.004	651.515	727.229	500.07	468.157	458.657	Eef1a1	eukaryotic translation elongation factor 1 alpha 1 [Source:MGI Symbol;Acc:MGI:1096881]
ENSMUSG00000089984	240.269	0.554921	0.14584	3.80499	0.000141808	0.00188688	274.013	294.634	289.685	214.231	194.672	174.378	Fbxo24	F-box protein 24 [Source:MGI Symbol;Acc:MGI:1918426]
ENSMUSG00000030344	3073.2	0.556715	0.0450876	12.3474	5.03E-35	7.99E-33	3801.94	3606.16	3568.25	2531.72	2378.51	2552.65	Akap3	A kinase anchor protein 3 [Source:MGI Symbol;Acc:MGI:1341149]
ENSMUSG00000021143	454.126	0.55909	0.112471	4.97097	6.66E-07	1.46E-05	536.61	556.07	531.089	413.076	326.699	361.211	Pacs2	phosphofurin acidic cluster sorting protein 2 [Source:MGI Symbol;Acc:MGI:1924399]
ENSMUSG00000074746	1682.78	0.559212	0.0532389	10.5038	8.29E-26	8.57E-24	2006.58	1997.43	2011.2	1372.38	1366.08	1343	Pdzd8	PDZ domain containing 8 [Source:MGI Symbol;Acc:MGI:2677270]
ENSMUSG00000018501	120.456	0.559797	0.201027	2.78468	0.00535812	0.0385794	141.288	153.542	135.79	97.6469	105.083	89.3868	Ncor1	nuclear receptor co-repressor 1 [Source:MGI Symbol;Acc:MGI:1349717]
ENSMUSG00000049008	495.477	0.56147	0.12197	4.60333	4.16E-06	7.95E-05	577.997	529.788	665.369	402.423	458.053	339.23	BB014433	expressed sequence BB014433 [Source:MGI Symbol;Acc:MGI:2142823]
ENSMUSG00000040548	1664.66	0.563606	0.0608013	9.26963	1.87E-20	1.44E-18	1879.56	1984.98	2092.67	1285.98	1418.62	1326.15	Tex2	testis expressed gene 2 [Source:MGI Symbol;Acc:MGI:102465]
ENSMUSG00000038453	977.885	0.564024	0.071802	7.85527	3.99E-15	2.24E-13	1207.37	1163.32	1128.56	787.685	760.502	819.867	Srcin1	SRC kinase signaling inhibitor 1 [Source:MGI Symbol;Acc:MGI:1933179]
ENSMUSG00000044320	931.34	0.565906	0.0717983	7.88189	3.22E-15	1.84E-13	1110.33	1092.77	1131.58	730.28	753.766	769.313	1700001O22Rik	RIKEN cDNA 1700001O22 gene [Source:MGI Symbol;Acc:MGI:1923631]
ENSMUSG00000033276	231.675	0.566279	0.155999	3.63001	0.000283415	0.00343843	288.285	278.035	262.527	160.378	183.221	217.606	Stk36	serine/threonine kinase 36 [Source:MGI Symbol;Acc:MGI:1920831]
ENSMUSG00000026933	446.37	0.567804	0.115837	4.90175	9.50E-07	2.00E-05	470.961	597.568	531.089	374.609	377.22	326.775	Camsap1	calmodulin regulated spectrin-associated protein 1 [Source:MGI Symbol;Acc:MGI:3036242]
ENSMUSG00000005983	117.41	0.570814	0.212011	2.69238	0.00709437	0.0481625	127.017	171.524	122.211	94.0961	93.6314	95.9809	1700037C18Rik	RIKEN cDNA 1700037C18 gene [Source:MGI Symbol;Acc:MGI:1920511]
ENSMUSG00000039512	152.218	0.570993	0.200593	2.84653	0.00441991	0.0332472	175.54	171.524	199.158	119.543	151.562	95.9809	Bltp3a	bridge-like lipid transfer protein family member 3A [Source:MGI Symbol;Acc:MGI:3041238]
ENSMUSG00000117477	670.836	0.571337	0.101438	5.63238	1.78E-08	4.88E-07	763.527	785.691	858.493	602.452	550.337	464.518	Gm50092	predicted gene, 50092 [Source:MGI Symbol;Acc:MGI:6275428]
ENSMUSG00000061533	574.745	0.57175	0.0910221	6.28143	3.35E-10	1.20E-08	665.053	683.33	713.65	471.664	463.442	451.33	Cep128	centrosomal protein 128 [Source:MGI Symbol;Acc:MGI:1922466]
ENSMUSG00000032178	191.814	0.573162	0.17609	3.25493	0.0011342	0.0112494	274.013	213.022	200.667	132.563	165.034	165.585	Ilf3	interleukin enhancer binding factor 3 [Source:MGI Symbol;Acc:MGI:1339973]
ENSMUSG00000029320	266.04	0.573999	0.15305	3.75041	0.000176547	0.00228626	348.225	272.502	334.948	230.802	231.721	178.041	1700016H13Rik	RIKEN cDNA 1700016H13 gene [Source:MGI Symbol;Acc:MGI:1921468]
ENSMUSG00000028018	218.974	0.57811	0.158725	3.64222	0.000270301	0.00329385	271.159	244.837	271.579	204.763	160.318	161.189	Gstcd	glutathione S-transferase, C-terminal domain containing [Source:MGI Symbol;Acc:MGI:1914803]
ENSMUSG00000006575	208.96	0.582224	0.212274	2.74279	0.00609197	0.0427628	279.722	302.934	168.983	176.948	202.082	123.09	Rundc3a	RUN domain containing 3A [Source:MGI Symbol;Acc:MGI:1858752]
ENSMUSG00000025369	484.974	0.582887	0.113809	5.12164	3.03E-07	6.97E-06	562.298	665.347	516.001	355.08	408.879	402.241	Smarcc2	SWI/SNF related, matrix associated, actin dependent regulator of chromatin, subfamily c, member 2 [Source:MGI Symbol;Acc:MGI:1915344]
ENSMUSG00000078439	4354.16	0.583909	0.035575	16.4135	1.53E-60	4.87E-58	5309.01	5239.78	5119.27	3421.78	3501.41	3533.71	Smim24	small integral membrane protein 24 [Source:MGI Symbol;Acc:MGI:1919523]
ENSMUSG00000028383	628.417	0.584039	0.0910893	6.41172	1.44E-10	5.53E-09	702.159	793.99	764.949	491.193	487.018	531.192	Hsdl2	hydroxysteroid dehydrogenase like 2 [Source:MGI Symbol;Acc:MGI:1919729]
ENSMUSG00000040576	148.821	0.584219	0.19029	3.07015	0.00213952	0.0187452	199.801	153.542	182.562	130.196	103.735	123.09	Tmem270	transmembrane protein 270 [Source:MGI Symbol;Acc:MGI:1923879]
ENSMUSG00000026915	239.706	0.584398	0.142302	4.10676	4.01E-05	0.000631459	286.858	269.735	306.281	183.458	201.409	190.496	Strbp	spermatid perinuclear RNA binding protein [Source:MGI Symbol;Acc:MGI:104626]
ENSMUSG00000042293	2175.27	0.58618	0.0482798	12.1413	6.38E-34	9.09E-32	2615.97	2531.36	2687.13	1739.3	1739.93	1737.91	Gm5617	predicted gene 5617 [Source:MGI Symbol;Acc:MGI:3643566]
ENSMUSG00000023456	410.362	0.586891	0.115827	5.06697	4.04E-07	9.12E-06	523.765	431.577	523.545	336.734	338.824	307.725	Tpi1	triosephosphate isomerase 1 [Source:MGI Symbol;Acc:MGI:98797]
ENSMUSG00000037196	352.191	0.588583	0.143995	4.08754	4.36E-05	0.000678349	489.514	379.013	399.825	255.657	249.908	339.23	Pacrg	PARK2 co-regulated [Source:MGI Symbol;Acc:MGI:1916560]
ENSMUSG00000109511	214.975	0.590093	0.18165	3.24853	0.00116004	0.0113859	235.48	273.885	265.544	146.174	222.964	145.803	Nup62	nucleoporin 62 [Source:MGI Symbol;Acc:MGI:1351500]
ENSMUSG00000028433	448.379	0.59135	0.110174	5.36743	7.99E-08	2.01E-06	505.212	551.92	559.755	364.548	321.984	386.854	Ubap2	ubiquitin-associated protein 2 [Source:MGI Symbol;Acc:MGI:1916176]
ENSMUSG00000032412	443.275	0.591386	0.120181	4.9208	8.62E-07	1.82E-05	469.533	497.973	632.176	367.507	358.359	334.101	Atp1b3	ATPase, Na+/K+ transporting, beta 3 polypeptide [Source:MGI Symbol;Acc:MGI:107788]
ENSMUSG00000037363	200.4	0.591684	0.165566	3.5737	0.000351969	0.00416614	248.325	221.321	253.474	156.235	184.568	138.476	Letm2	leucine zipper-EF-hand containing transmembrane protein 2 [Source:MGI Symbol;Acc:MGI:2444979]
ENSMUSG00000011832	177.801	0.591773	0.197077	3.00275	0.00267552	0.022351	195.52	186.74	259.509	134.93	175.811	114.298	Evi5l	ecotropic viral integration site 5 like [Source:MGI Symbol;Acc:MGI:2442167]
ENSMUSG00000025069	427.567	0.593199	0.11954	4.96236	6.96E-07	1.51E-05	546.6	475.841	520.527	321.939	392.039	308.458	Gsto2	glutathione S-transferase omega 2 [Source:MGI Symbol;Acc:MGI:1915464]
ENSMUSG00000057116	132.777	0.593431	0.20362	2.91441	0.00356364	0.0279875	144.142	179.824	155.404	113.625	117.208	86.4561	Semp2l2a	SUMO/sentrin specific peptidase 2-like 2A [Source:MGI Symbol;Acc:MGI:2667157]
ENSMUSG00000017843	365.639	0.596562	0.124915	4.77575	1.79E-06	3.61E-05	452.408	396.995	470.738	256.841	309.859	306.992	Ppp2r5c	protein phosphatase 2, regulatory subunit B', gamma [Source:MGI Symbol;Acc:MGI:1349475]
ENSMUSG00000020496	170.962	0.597864	0.182432	3.27718	0.00104848	0.0105641	252.606	183.973	181.053	133.747	146.173	128.219	Rnf187	ring finger protein 187 [Source:MGI Symbol;Acc:MGI:1914224]
ENSMUSG00000072663	153.066	0.601601	0.17852	3.36994	0.000751842	0.00799449	185.53	165.991	202.176	118.952	121.923	123.823	Spef2	sperm flagellar 2 [Source:MGI Symbol;Acc:MGI:2443727]
ENSMUSG00000037075	842.507	0.602909	0.0776968	7.75976	8.51E-15	4.54E-13	1076.07	962.748	1009.37	673.468	652.725	680.659	Rnf139	ring finger protein 139 [Source:MGI Symbol;Acc:MGI:1923091]
ENSMUSG00000057719	660.142	0.603475	0.098211	6.14468	8.01E-10	2.66E-08	692.169	850.704	846.422	532.028	553.031	486.499	Sh3rf2	SH3 domain containing ring finger 2 [Source:MGI Symbol;Acc:MGI:2444628]
ENSMUSG00000032803	1252.07	0.605998	0.0707629	8.56377	1.09E-17	7.28E-16	1479.96	1510.52	1543.48	955.164	1089.9	933.433	Cdv3	carnitine deficiency-associated gene expressed in ventricle 3 [Source:MGI Symbol;Acc:MGI:2448759]
ENSMUSG00000032010	1113.52	0.606489	0.074001	8.19568	2.49E-16	1.54E-14	1324.4	1394.32	1314.14	876.455	958.543	813.273	Usp2	ubiquitin specific peptidase 2 [Source:MGI Symbol;Acc:MGI:1858178]
ENSMUSG00001074846	1815.01	0.606627	0.0655601	9.25299	2.18E-20	1.67E-18	2077.94	2416.55	2076.07	1364.1	1431.41	1523.97	Iqcf3	IQ motif containing F3 [Source:MGI Symbol;Acc:MGI:1915515]
ENSMUSG00000031493	834.743	0.607692	0.0813995	7.46555	8.30E-14	4.06E-12	1037.54	966.898	1018.42	614.879	661.482	709.233	Ggn	gametogenetin [Source:MGI Symbol;Acc:MGI:2181461]
ENSMUSG00000027708	233.788	0.608436	0.154911	3.92765	8.58E-05	0.00123042	268.305	279.418	300.246	210.089	188.61	156.061	Dcun1d1	defective in cullin neddylation 1 domain containing 1 [Source:MGI Symbol;Acc:MGI:2150386]
ENSMUSG00000025482	149.477	0.611101	0.227666	2.6842	0.00727044	0.0489954	124.162	236.537	181.053	101.789	144.152	109.169	Cimap1a	ciliary microtubule associated protein 1A [Source:MGI Symbol;Acc:MGI:1916537]
ENSMUSG00000017832	3141.27	0.612388	0.0531362	11.5249	9.88E-31	1.24E-28	3794.8	3628.29	3972.6	2583.2	2271.4	2597.35	Hspb9	heat shock protein, alpha-crystallin-related, B9 [Source:MGI Symbol;Acc:MGI:1922732]
ENSMUSG00000040729	140.057	0.61334	0.205007	2.99181	0.00277333	0.023098	195.52	182.59	129.755	115.993	96.3258	120.159	Cep126	centrosomal protein 126 [Source:MGI Symbol;Acc:MGI:2680221]
ENSMUSG00000064367	207.085	0.613598	0.169399	3.62221	0.0002921	0.00352827	231.199	219.938	300.246	151.501	154.256	185.368	mt-Nd5	mitochondrially encoded NADH dehydrogenase 5 [Source:MGI Symbol;Acc:MGI:102496]
ENSMUSG00000064202	791.72	0.61387	0.0812212	7.55799	4.09E-14	2.07E-12	921.941	1007.01	944.493	660.448	599.51	616.915	Spata6l	spermatogenesis associated 6 like [Source:MGI Symbol;Acc:MGI:1918036]
ENSMUSG00000030059	595.107	0.614789	0.0998094	6.15963	7.29E-10	2.44E-08	656.49	762.175	742.317	496.52	490.386	422.756	Tmf1	TATA element modulatory factor 1 [Source:MGI Symbol;Acc:MGI:2684999]
ENSMUSG00000050612	1952.8	0.616909	0.0507232	12.1623	4.94E-34	7.16E-32	2310.56	2362.61	2418.57	1515.6	1537.17	1572.33	Txndc2	thioredoxin domain containing 2 (spermatozoa) [Source:MGI Symbol;Acc:MGI:2389312]
ENSMUSG00000030747	198.215	0.618428	0.172298	3.5893	0.000331573	0.00396448	194.093	257.286	268.562	147.95	144.826	176.576	Dgat2	diacylglycerol O-acyltransferase 2 [Source:MGI Symbol;Acc:MGI:1915050]
ENSMUSG00000057230	146.315	0.618733	0.228446	2.70844	0.00676005	0.0463498	127.017	250.37	153.895	106.524	127.985	112.1	Aak1	AP2 associated kinase 1 [Source:MGI Symbol;Acc:MGI:1098687]
ENSMUSG00000026927	399.597	0.618911	0.113678	5.44443	5.20E-08	1.35E-06	509.494	479.991	461.685	291.757	313.227	341.428	Entr1	endosome associated trafficking regulator 1 [Source:MGI Symbol;Acc:MGI:1915362]
ENSMUSG00000020131	113.226	0.619605	0.226379	2.73703	0.00619967	0.0433714	144.142	142.476	125.228	111.85	71.4023	84.2581	Pcsk4	proprotein convertase subtilisin/kexin type 4 [Source:MGI Symbol;Acc:MGI:97514]
ENSMUSG00000039781	116.994	0.622911	0.206571	3.01548	0.00256571	0.0216526	128.444	153.542	143.334	82.2601	97.673	96.7136	Cep131	centrosomal protein 131 [Source:MGI Symbol;Acc:MGI:107440]
ENSMUSG00000038199	124.639	0.62453	0.211739	2.94953	0.00318259	0.0256282	158.414	117.577	178.035	100.014	104.409	89.3868	Iqca1l	IQ motif containing with AAA domain 1 like [Source:MGI Symbol;Acc:MGI:3045319]
ENSMUSG00000032959	434.774	0.624893	0.12703	4.91925	8.69E-07	1.83E-05	506.639	507.656	567.299	305.368	309.186	412.498	Pebp1	phosphatidylethanolamine binding protein 1 [Source:MGI Symbol;Acc:MGI:1344408]
ENSMUSG00000039275	152.644	0.625235	0.191689	3.26171	0.00110742	0.0110501	202.656	150.775	202.176	105.932	132.701	121.625	Foxk2	forkhead box K2 [Source:MGI Symbol;Acc:MGI:1916087]
ENSMUSG00000024981	115.228	0.627555	0.219276	2.86194	0.00421051	0.032062	145.57	152.158	122.211	100.606	99.0202	71.8025	Acsl5	acyl-CoA synthetase long-chain family member 5 [Source:MGI Symbol;Acc:MGI:1919129]
ENSMUSG00000022280	580.616	0.62984	0.0978652	6.4358	1.23E-10	4.76E-09	716.431	723.444	675.931	432.605	505.205	430.082	Rnf19a	ring finger protein 19A [Source:MGI Symbol;Acc:MGI:1353623]
ENSMUSG00000036770	226.107	0.633138	0.163956	3.86164	0.00011263	0.0015561	286.858	229.621	309.299	201.804	174.464	154.595	Stpg3	sperm tail PG rich repeat containing 3 [Source:MGI Symbol;Acc:MGI:1921722]
ENSMUSG00000026311	154.619	0.633949	0.192461	3.29391	0.000988038	0.0101155	195.52	192.273	176.527	140.256	95.6522	127.486	Asb1	ankyrin repeat and SOCS box-containing 1 [Source:MGI Symbol;Acc:MGI:1929735]
ENSMUSG00000018401	293.509	0.635358	0.129077	4.92233	8.55E-07	1.81E-05	376.768	347.198	347.018	224.292	219.596	246.18	Mtmr4	myotubularin related protein 4 [Source:MGI Symbol;Acc:MGI:2180699]
ENSMUSG00000018554	3463.86	0.635604	0.0424011	14.9903	8.50E-51	2.01E-48	4163.01	4231.39	4248.71	2606.28	2842.62	2691.13	Ybx2	Y box protein 2 [Source:MGI Symbol;Acc:MGI:1096372]
ENSMUSG00000074435	3447.03	0.635706	0.040917	15.5365	1.96E-54	5.07E-52	4128.75	4180.21	4272.85	2601.55	2764.48	2734.36	Smcp	sperm mitochondria-associated cysteine-rich protein [Source:MGI Symbol;Acc:MGI:96945]
ENSMUSG00000001089	1058.74	0.637179	0.067985	9.37235	7.09E-21	5.53E-19	1305.85	1250.47	1311.12	852.783	821.127	811.075	Luzp1	leucine zipper protein 1 [Source:MGI Symbol;Acc:MGI:107629]
ENSMUSG00000042156	486.242	0.637799	0.102347	6.23176	4.61E-10	1.61E-08	555.163	622.466	598.983	401.24	380.588	359.013	Dzip1	DAZ interacting protein 1 [Source:MGI Symbol;Acc:MGI:1914311]
ENSMUSG00000079235	162.6	0.637848	0.206078	3.09518	0.00196692	0.0176894	139.861	251.753	202.176	133.155	113.84	134.813	Ccdc13	coiled-coil domain containing 13 [Source:MGI Symbol;Acc:MGI:1920144]
ENSMUSG00000044468	926.178	0.638168	0.085001	7.50777	6.01E-14	3.01E-12	1163.13	1037.44	1184.39	754.544	770.606	646.955	Tent5c	terminal nucleotidyltransferase 5C [Source:MGI Symbol;Acc:MGI:1921895]
ENSMUSG00000052698	804.42	0.638308	0.0828492	7.70446	1.31E-14	6.87E-13	967.61	1066.49	903.756	624.348	646.663	617.648	Tln2	talin 2 [Source:MGI Symbol;Acc:MGI:1917799]
ENSMUSG00000072720	164.314	0.641885	0.175759	3.65208	0.000260129	0.00319345	184.103	199.189	217.263	115.993	128.659	140.674	Myo18b	myosin XVIIIb [Source:MGI Symbol;Acc:MGI:1921626]
ENSMUSG00000024500	350.98	0.643704	0.128574	5.00647	5.54E-07	1.23E-05	438.136	473.074	372.667	296.491	248.561	276.953	Ppp2r2b	protein phosphatase 2, regulatory subunit B, beta [Source:MGI Symbol;Acc:MGI:1920180]
ENSMUSG00000029655	171.61	0.643848	0.204244	3.15235	0.00161962	0.0150861	231.199	197.806	199.158	133.747	171.77	95.9809	N4bp2l2	NEDD4 binding protein 2-like 2 [Source:MGI Symbol;Acc:MGI:2687207]
ENSMUSG00000014747	126.065	0.645112	0.203358	3.1723	0.00151236	0.0142639	168.404	128.643	164.456	101.198	88.9161	104.773	Ankrd53	ankyrin repeat domain 53 [Source:MGI Symbol;Acc:MGI:1922555]
ENSMUSG00000011877	2222.52	0.64519	0.0527352	12.2345	2.03E-34	3.05E-32	2601.7	2882.71	2649.41	1780.13	1675.93	1745.24	Git1	GIT ArfGAP 1 [Source:MGI Symbol;Acc:MGI:1927140]
ENSMUSG00000034312	97.224	0.646955	0.22384	2.89026	0.00384925	0.0296794	107.036	116.194	132.772	73.3831	74.0968	79.862	Iqsec1	IQ motif and Sec7 domain 1 [Source:MGI Symbol;Acc:MGI:1196356]
ENSMUSG00000050107	1494.31	0.647098	0.0662418	9.76872	1.53E-22	1.36E-20	1669.77	1961.46	1839.2	1128.56	1149.17	1217.71	Haspin	histone H3 associated protein kinase [Source:MGI Symbol;Acc:MGI:1194498]
ENSMUSG00000047417	517.942	0.647541	0.1085	5.96812	2.40E-09	7.34E-08	636.51	658.431	600.492	348.57	436.497	427.152	Rexo1	REX1, RNA exonuclease 1 [Source:MGI Symbol;Acc:MGI:1914182]
ENSMUSG00000024206	633.678	0.648123	0.0934484	6.93563	4.04E-12	1.73E-10	843.448	784.308	692.527	490.01	487.691	504.083	Rfx2	regulatory factor X, 2 (influences HLA class II expression) [Source:MGI Symbol;Acc:MGI:106583]
ENSMUSG00000034928	415.727	0.649829	0.121192	5.36199	8.23E-08	2.07E-06	495.222	520.105	508.457	318.98	373.178	278.418	Rnf44	ring finger protein 44 [Source:MGI Symbol;Acc:MGI:2145310]
ENSMUSG00000027944	92.2879	0.650342	0.242867	2.67777	0.00741144	0.0497832	114.172	106.511	117.684	81.6683	54.5622	79.1293	Hax1	HCLS1 associated X-1 [Source:MGI Symbol;Acc:MGI:1346319]
ENSMUSG00000051343	1299.58	0.650622	0.0735012	8.85185	8.61E-19	6.13E-17	1441.42	1650.23	1673.23	1091.87	962.584	978.126	Rab11fip5	RAB11 family interacting protein 5 (class I) [Source:MGI Symbol;Acc:MGI:1098586]
ENSMUSG00000024260	110.225	0.651976	0.241606	2.69851	0.00696511	0.0475192	151.278	134.176	119.193	107.707	88.9161	60.0797	Sap130	Sin3A associated protein [Source:MGI Symbol;Acc:MGI:1919782]
ENSMUSG00000024042	192.669	0.652537	0.182408	3.57734	0.000347108	0.00412041	264.023	242.07	200.667	156.827	174.464	117.961	Sik1	salt inducible kinase 1 [Source:MGI Symbol;Acc:MGI:104754]
ENSMUSG00000021007	1139.89	0.653236	0.0766045	8.52738	1.50E-17	9.89E-16	1237.34	1442.74	1501.23	901.902	844.703	911.452	Spata7	spermatogenesis associated 7 [Source:MGI Symbol;Acc:MGI:2144877]
ENSMUSG00000041740	549.42	0.654142	0.102667	6.37151	1.87E-10	6.97E-09	683.606	672.264	660.843	481.133	392.039	406.637	Rnf10	ring finger protein 10 [Source:MGI Symbol;Acc:MGI:1859162]
ENSMUSG00000031985	520.105	0.655381	0.108904	6.01796	1.77E-09	5.53E-08	717.858	600.334	589.931	398.873	371.831	441.805	Gnpat	glyceronephosphate O-acyltransferase [Source:MGI Symbol;Acc:MGI:1343460]
ENSMUSG00000015443	96.7839	0.655389	0.221559	2.95808	0.00309564	0.0250502	108.464	124.493	122.211	74.5667	74.7704	76.1986	Gzmn	granzyme N [Source:MGI Symbol;Acc:MGI:2675494]
ENSMUSG00000033819	176.327	0.657853	0.164203	4.00633	6.17E-05	0.000923029	214.073	229.621	203.685	134.93	140.11	135.546	Ppp1r16a	protein phosphatase 1, regulatory subunit 16A [Source:MGI Symbol;Acc:MGI:1920312]
ENSMUSG00000038587	12431.3	0.663614	0.0221259	29.9926	1.23E-197	5.06E-194	15057.9	15330.7	15333.7	9583.01	9606.98	9675.76	Akap12	A kinase anchor protein 12 [Source:MGI Symbol;Acc:MGI:1932576]
ENSMUSG00000026853	300.934	0.665852	0.138616	4.80358	1.56E-06	3.17E-05	306.838	419.127	381.72	243.229	229.026	225.665	Crat	carnitine acetyltransferase [Source:MGI Symbol;Acc:MGI:109501]
ENSMUSG00000020317	713.319	0.668503	0.0859267	7.77992	7.26E-15	3.89E-13	860.573	915.717	850.949	581.147	513.962	557.569	Spmap2	sperm microtubule associated protein 2 [Source:MGI Symbol;Acc:MGI:1338756]
ENSMUSG00000029403	188.933	0.67259	0.164165	4.09703	4.18E-05	0.000654833	219.782	246.22	230.842	150.909	157.624	128.219	Cdkl2	cyclin dependent kinase like 2 [Source:MGI Symbol;Acc:MGI:1858227]
ENSMUSG00000003131	174.872	0.67274	0.170117	3.95458	7.67E-05	0.00111523	185.53	225.471	233.86	137.297	129.333	137.744	Pafah1b2	platelet-activating factor acetylhydrolase, isoform 1b, subunit 2 [Source:MGI Symbol;Acc:MGI:108415]
ENSMUSG00000020823	704.705	0.673553	0.104035	6.47428	9.53E-11	3.75E-09	732.13	936.466	930.914	548.598	591.427	488.697	Sec14l1	SEC14-like lipid binding 1 [Source:MGI Symbol;Acc:MGI:1921386]
ENSMUSG00000025410	379.851	0.675585	0.127712	5.2899	1.22E-07	3.05E-06	545.173	430.193	425.474	270.452	287.63	320.181	Dctn2	dynactin 2 [Source:MGI Symbol;Acc:MGI:107733]
ENSMUSG00000059288	538.426	0.676027	0.106866	6.32593	2.52E-10	9.16E-09	740.692	623.85	623.124	456.869	385.977	400.043	Cdyl	chromodomain protein, Y chromosome-like [Source:MGI Symbol;Acc:MGI:1339956]
ENSMUSG00000039501	262.792	0.676846	0.139037	4.86811	1.13E-06	2.34E-05	325.391	327.832	316.843	197.069	224.985	184.635	Znfx1	zinc finger, NFX1-type containing 1 [Source:MGI Symbol;Acc:MGI:2138982]
ENSMUSG00000034007	340.096	0.678028	0.133748	5.06946	3.99E-07	9.03E-06	448.126	438.493	368.141	226.659	290.998	268.16	Scaper	S phase cyclin A-associated protein in the ER [Source:MGI Symbol;Acc:MGI:1925976]
ENSMUSG00000031545	1874.12	0.678627	0.0692981	9.79287	1.21E-22	1.09E-20	2260.61	2365.37	2291.83	1258.17	1500.8	1567.93	Gpat4	glycerol-3-phosphate acyltransferase 4 [Source:MGI Symbol;Acc:MGI:2142716]
ENSMUSG00000048175	208.003	0.678746	0.158707	4.27673	1.90E-05	0.000316561	221.209	272.502	274.597	168.071	147.52	164.12	Asb8	ankyrin repeat and SOCS box-containing 8 [Source:MGI Symbol;Acc:MGI:1925791]
ENSMUSG00000047141	430.547	0.679762	0.119214	5.70201	1.18E-08	3.30E-07	518.057	580.969	490.352	319.572	297.734	376.597	Zfp654	zinc finger protein 654 [Source:MGI Symbol;Acc:MGI:1919270]
ENSMUSG00000052221	411.074	0.680714	0.125415	5.42771	5.71E-08	1.47E-06	468.106	572.669	476.773	278.737	311.88	358.28	Ppp1r36	protein phosphatase 1, regulatory subunit 36 [Source:MGI Symbol;Acc:MGI:2684916]
ENSMUSG00000018196	117.302	0.68215	0.217058	3.1427	0.00167395	0.0154262	151.278	112.044	170.491	85.8109	96.9994	87.1888	Glrx2	glutaredoxin 2 [Source:MGI Symbol;Acc:MGI:1916617]
ENSMUSG00000002496	114.75	0.685223	0.235663	2.90764	0.00364162	0.0284108	95.6193	148.009	181.053	85.8109	92.2842	85.7234	Tsc2	TSC complex subunit 2 [Source:MGI Symbol;Acc:MGI:102548]
ENSMUSG00000050035	1098.82	0.686236	0.0782371	8.77123	1.77E-18	1.23E-16	1475.68	1287.81	1303.58	913.146	784.752	827.927	Fhl4	four and a half LIM domains 4 [Source:MGI Symbol;Acc:MGI:1338765]
ENSMUSG00000029577	446.12	0.686403	0.11912	5.7623	8.30E-09	2.36E-07	522.338	557.453	571.825	388.22	290.325	346.557	Ube3b	ubiquitin protein ligase E3B [Source:MGI Symbol;Acc:MGI:1891295]
ENSMUSG00000038260	358.001	0.688253	0.14416	4.77424	1.80E-06	3.63E-05	555.163	377.63	392.281	268.085	256.644	298.2	Trpm4	transient receptor potential cation channel, subfamily M, member 4 [Source:MGI Symbol;Acc:MGI:1915917]
ENSMUSG00000003824	375.229	0.689508	0.124487	5.5388	3.05E-08	8.12E-07	459.543	532.555	396.808	282.88	283.589	296.002	Syce2	synaptonemal complex central element protein 2 [Source:MGI Symbol;Acc:MGI:1919096]
ENSMUSG00000034075	106.258	0.690449	0.225921	3.05615	0.00224197	0.0194547	135.58	146.625	111.649	95.2797	78.812	69.6045	Zdhhc5	zinc finger, DHHC domain containing 5 [Source:MGI Symbol;Acc:MGI:1923573]
ENSMUSG00000039523	239.832	0.691927	0.15208	4.54974	5.37E-06	0.000100174	303.984	268.352	316.843	199.436	156.95	193.427	Cep104	centrosomal protein 104 [Source:MGI Symbol;Acc:MGI:2687282]
ENSMUSG00000037210	390.749	0.692761	0.119061	5.81852	5.94E-09	1.73E-07	442.417	467.541	538.632	281.696	323.331	290.873	Fam193a	family with sequence homology 193, member A [Source:MGI Symbol;Acc:MGI:2447768]
ENSMUSG00000044934	103.347	0.693101	0.249969	2.77274	0.00555861	0.0396924	158.414	95.4448	129.755	98.8305	68.0343	69.6045	Zfp367	zinc finger protein 367 [Source:MGI Symbol;Acc:MGI:2442266]
ENSMUSG00000024317	1331.01	0.693328	0.0635308	10.9132	9.96E-28	1.14E-25	1614.11	1682.04	1637.02	998.365	976.73	1077.77	Rnf138	ring finger protein 138 [Source:MGI Symbol;Acc:MGI:1929211]
ENSMUSG00000026269	186.975	0.695949	0.200133	3.47742	0.000506257	0.00571837	236.907	224.088	232.351	145.583	99.0202	183.902	Rnpepl1	arginyl aminopeptidase (aminopeptidase B)-like 1 [Source:MGI Symbol;Acc:MGI:1914170]
ENSMUSG00000057286	682.774	0.697523	0.0941487	7.40874	1.28E-13	6.09E-12	884.835	872.836	777.019	550.965	544.274	466.716	St6galnac2	ST6 (alpha-N-acetyl-neuraminyl-2,3-beta-galactosyl-1,3)-N-acetylgalactosaminide alpha-2,6-sialyltransferase 2 [Source:MGI Symbol;Acc:MGI:107553]
ENSMUSG00000008813	2662.63	0.697627	0.0450704	15.4786	4.84E-54	1.21E-51	3243.92	3400.05	3237.83	2055.32	1978.38	2060.29	Tppp2	tubulin polymerization-promoting protein family member 2 [Source:MGI Symbol;Acc:MGI:2684923]
ENSMUSG00000051728	191.634	0.69898	0.194539	3.59302	0.000326873	0.00391962	245.47	225.471	241.404	173.397	163.687	100.377	Fam243	family with sequence similarity 243 [Source:MGI Symbol;Acc:MGI:1922578]
ENSMUSG00000078937	256.958	0.699475	0.155404	4.50102	6.76E-06	0.000124442	315.401	297.401	340.983	187.009	165.034	235.923	Cpt1b	carnitine palmitoyltransferase 1b, muscle [Source:MGI Symbol;Acc:MGI:1098297]
ENSMUSG00000037253	175.51	0.700659	0.178216	3.93151	8.44E-05	0.00121505	241.189	235.154	175.018	127.237	128.659	145.803	Mex3c	mex3 RNA binding family member C [Source:MGI Symbol;Acc:MGI:2652843]
ENSMUSG00000049792	1590.83	0.701491	0.064528	10.8711	1.58E-27	1.77E-25	1852.44	1908.9	2150	1181.82	1267.05	1184.74	Bag5	BCL2-associated athanogene 5 [Source:MGI Symbol;Acc:MGI:1917619]
ENSMUSG00000021948	553.573	0.701824	0.096733	7.25527	4.01E-13	1.81E-11	706.441	690.246	660.843	455.685	400.123	408.102	Prkcd	protein kinase C, delta [Source:MGI Symbol;Acc:MGI:97598]
ENSMUSG00000044787	416.494	0.704134	0.116376	6.05049	1.44E-09	4.62E-08	495.222	479.991	573.334	313.654	291.672	345.092	Spata32	spermatogenesis associated 32 [Source:MGI Symbol;Acc:MGI:3045340]
ENSMUSG00000012126	780.218	0.705125	0.0853	8.2664	1.38E-16	8.64E-15	960.474	899.118	1042.56	575.821	631.843	571.489	Ubxn11	UBX domain protein 11 [Source:MGI Symbol;Acc:MGI:1914836]
ENSMUSG00000025500	202.78	0.706019	0.161139	4.38143	1.18E-05	0.000206381	264.023	244.837	245.93	165.704	165.034	131.149	Lmntd2	lamin tail domain containing 2 [Source:MGI Symbol;Acc:MGI:1919250]
ENSMUSG00000029458	452.218	0.706948	0.108742	6.50112	7.97E-11	3.17E-09	583.706	535.321	562.773	322.531	328.72	380.26	Brap	BRCA1 associated protein [Source:MGI Symbol;Acc:MGI:1919649]
ENSMUSG00000038127	165.384	0.707093	0.192287	3.67728	0.000235738	0.0029421	161.268	248.987	205.193	139.073	112.492	125.288	Ccdc50	coiled-coil domain containing 50 [Source:MGI Symbol;Acc:MGI:1914751]
ENSMUSG00000004032	6036.44	0.707704	0.030873	22.9231	2.73E-116	3.23E-113	7394.08	7477.9	7590.64	4494.72	4634.42	4626.87	Gstm5	glutathione S-transferase, mu 5 [Source:MGI Symbol;Acc:MGI:1309466]
ENSMUSG00000026254	133.99	0.711116	0.251428	2.8283	0.00467953	0.0346126	109.891	181.207	208.211	119.543	70.0551	115.031	Eif4e2	eukaryotic translation initiation factor 4E member 2 [Source:MGI Symbol;Acc:MGI:1914440]
ENSMUSG00000000127	119.743	0.711688	0.23329	3.05065	0.00228345	0.0197135	172.686	123.11	150.877	117.768	73.4232	80.5947	Fer	FER tyrosine kinase [Source:MGI Symbol;Acc:MGI:105917]
ENSMUSG00000001542	153.021	0.711954	0.200708	3.54722	0.000389325	0.00456256	229.772	196.423	143.334	107.707	110.472	130.417	Ell2	elongation factor for RNA polymerase II 2 [Source:MGI Symbol;Acc:MGI:2183438]
ENSMUSG00000029128	233.13	0.712849	0.165262	4.31346	1.61E-05	0.000273791	242.616	338.898	286.667	169.846	155.603	205.15	Rab28	RAB28, member RAS oncogene family [Source:MGI Symbol;Acc:MGI:1917285]
ENSMUSG00000018428	4861.96	0.714945	0.0383725	18.6317	1.78E-77	8.64E-75	5885.58	6368.52	5873.66	3767.99	3636.8	3639.22	Akap1	A kinase anchor protein 1 [Source:MGI Symbol;Acc:MGI:104729]
ENSMUSG00000064341	325.972	0.71506	0.132506	5.39643	6.80E-08	1.74E-06	385.331	448.176	381.72	236.128	279.547	224.932	mt-Nd1	mitochondrially encoded NADH dehydrogenase 1 [Source:MGI Symbol;Acc:MGI:101787]
ENSMUSG00000041757	120.723	0.718225	0.226372	3.17276	0.00150998	0.0142577	118.454	149.392	182.562	74.5667	107.777	91.5848	Plekha6	pleckstrin homology domain containing, family A member 6 [Source:MGI Symbol;Acc:MGI:2388662]
ENSMUSG00000060260	1354	0.718854	0.0655012	10.9747	5.06E-28	5.97E-26	1704.02	1716.62	1632.49	990.672	1101.35	978.859	Pwwp2b	PWWP domain containing 2B [Source:MGI Symbol;Acc:MGI:2142008]
ENSMUSG00000040990	126.646	0.71975	0.218546	3.29336	0.000989988	0.0101229	155.56	131.41	185.579	75.1585	103.735	108.436	Sh3kbp1	SH3-domain kinase binding protein 1 [Source:MGI Symbol;Acc:MGI:1889583]
ENSMUSG00000029030	203.73	0.720198	0.190343	3.78369	0.000154522	0.00202644	266.878	289.101	203.685	115.401	175.138	172.179	Tprg1l	transformation related protein 63 regulated 1 like [Source:MGI Symbol;Acc:MGI:1915058]
ENSMUSG00000040209	74.3789	0.720777	0.253979	2.83794	0.00454058	0.0339496	102.755	82.9955	92.0352	56.2209	56.583	55.6836	Zfp704	zinc finger protein 704 [Source:MGI Symbol;Acc:MGI:2180715]
ENSMUSG00000034300	242.919	0.721578	0.159944	4.51145	6.44E-06	0.000119004	363.924	284.951	258	166.296	204.103	180.239	Fam53c	family with sequence similarity 53, member C [Source:MGI Symbol;Acc:MGI:1913556]
ENSMUSG00000074817	582.388	0.721599	0.115667	6.2386	4.42E-10	1.57E-08	800.633	579.585	795.124	421.361	425.046	472.578	Papolb	poly (A) polymerase beta (testis specific) [Source:MGI Symbol;Acc:MGI:1932115]
ENSMUSG00000056851	355.24	0.722619	0.126406	5.71663	1.09E-08	3.05E-07	438.136	419.127	469.229	242.046	256.644	306.26	Pcbp2	poly(rC) binding protein 2 [Source:MGI Symbol;Acc:MGI:108202]
ENSMUSG00000063550	1661.83	0.726179	0.0686388	10.5797	3.70E-26	3.92E-24	2060.81	2283.76	1867.86	1199.58	1314.88	1244.09	Nup98	nucleoporin 98 [Source:MGI Symbol;Acc:MGI:109404]
ENSMUSG00000017119	2140.99	0.727367	0.0512959	14.1798	1.22E-45	2.40E-43	2740.13	2749.92	2518.14	1634.55	1613.29	1589.91	Nbr1	NBR1, autophagy cargo receptor [Source:MGI Symbol;Acc:MGI:108498]
ENSMUSG00000029814	257.099	0.728234	0.145745	4.99662	5.83E-07	1.29E-05	359.643	283.568	318.351	175.764	199.388	205.883	Igf2bp3	insulin-like growth factor 2 mRNA binding protein 3 [Source:MGI Symbol;Acc:MGI:1890359]
ENSMUSG00000028416	2107.51	0.728674	0.0520794	13.9916	1.75E-44	3.37E-42	2694.47	2535.51	2658.46	1658.81	1562.09	1535.69	Bag1	BCL2-associated athanogene 1 [Source:MGI Symbol;Acc:MGI:108047]
ENSMUSG00000028793	1757.25	0.728707	0.0597507	12.1958	3.27E-34	4.83E-32	2170.7	2301.74	2103.23	1390.73	1242.13	1334.94	Rnf19b	ring finger protein 19B [Source:MGI Symbol;Acc:MGI:1922484]
ENSMUSG00000109561	111.025	0.73037	0.251052	2.90923	0.00362318	0.0283741	108.464	149.392	158.421	107.116	84.8745	57.8816	Ankrd31	ankyrin repeat domain 31 [Source:MGI Symbol;Acc:MGI:5006716]
ENSMUSG00000018001	67.3989	0.730906	0.272053	2.68663	0.00721765	0.0488388	88.4835	92.6783	70.9124	47.3439	47.8261	57.1489	Cyth3	cytohesin 3 [Source:MGI Symbol;Acc:MGI:1335107]
ENSMUSG00000020024	206.197	0.731088	0.160201	4.56356	5.03E-06	9.47E-05	238.335	293.251	239.895	141.44	162.339	161.922	Cep83	centrosomal protein 83 [Source:MGI Symbol;Acc:MGI:1924298]
ENSMUSG00000025025	156.336	0.731854	0.183315	3.99234	6.54E-05	0.000975709	196.947	207.489	181.053	129.012	99.6938	123.823	Mxi1	MAX interactor 1, dimerization protein [Source:MGI Symbol;Acc:MGI:97245]
ENSMUSG00000029769	5595.28	0.732381	0.0349082	20.9802	9.95E-98	9.13E-95	6984.49	7166.66	6801.55	4061.52	4238.34	4319.14	Ccdc136	coiled-coil domain containing 136 [Source:MGI Symbol;Acc:MGI:1918128]
ENSMUSG00000018570	799.62	0.732504	0.0853787	8.57948	9.53E-18	6.45E-16	926.222	1088.62	980.703	624.348	613.656	564.163	2810408A11Rik	RIKEN cDNA 2810408A11 gene [Source:MGI Symbol;Acc:MGI:1917669]
ENSMUSG00000032280	483.809	0.734137	0.115669	6.34688	2.20E-10	8.10E-09	535.182	639.065	639.72	389.996	385.303	313.586	Tle3	transducin-like enhancer of split 3 [Source:MGI Symbol;Acc:MGI:104634]
ENSMUSG00000043621	113.78	0.737312	0.249762	2.95205	0.00315669	0.0254445	169.831	92.6783	164.456	78.7093	103.735	73.2679	Ubxn10	UBX domain protein 10 [Source:MGI Symbol;Acc:MGI:2443123]
ENSMUSG00000035890	391.6	0.737455	0.11964	6.16396	7.09E-10	2.39E-08	559.444	455.092	454.141	303.001	277.526	300.398	Rnf126	ring finger protein 126 [Source:MGI Symbol;Acc:MGI:1917544]
ENSMUSG00000011350	365.38	0.743715	0.114177	6.51369	7.33E-11	2.96E-09	472.388	435.726	464.702	279.921	264.054	275.487	Gm5893	predicted gene 5893 [Source:MGI Symbol;Acc:MGI:3645761]
ENSMUSG00000026155	523.617	0.745097	0.101469	7.34308	2.09E-13	9.80E-12	717.858	637.682	612.562	415.443	377.894	380.26	Smap1	small ArfGAP 1 [Source:MGI Symbol;Acc:MGI:2138261]
ENSMUSG00000032566	430.248	0.748605	0.105868	7.07113	1.54E-12	6.68E-11	555.163	535.321	528.071	336.142	305.144	321.646	Nudt16l2	nudix hydrolase 16 like 2 [Source:MGI Symbol;Acc:MGI:1920782]
ENSMUSG00000021476	1123.38	0.748619	0.0785606	9.52919	1.59E-21	1.30E-19	1501.37	1366.66	1356.39	767.564	926.21	822.066	Habp4	hyaluronic acid binding protein 4 [Source:MGI Symbol;Acc:MGI:1891713]
ENSMUSG00000005802	253.068	0.748957	0.160678	4.66123	3.14E-06	6.08E-05	248.325	323.683	380.211	180.499	205.45	180.239	Slc30a4	solute carrier family 30 (zinc transporter), member 4 [Source:MGI Symbol;Acc:MGI:1345282]
ENSMUSG00000061882	116.059	0.749629	0.203433	3.6849	0.000228788	0.00287272	155.56	145.242	135.79	84.6273	91.6106	83.5254	Ccdc62	coiled-coil domain containing 62 [Source:MGI Symbol;Acc:MGI:2684996]
ENSMUSG00000036501	152.139	0.749793	0.182454	4.1095	3.97E-05	0.000626388	176.967	177.057	218.772	119.543	109.124	111.367	Fam13b	family with sequence similarity 13, member B [Source:MGI Symbol;Acc:MGI:2447834]
ENSMUSG00000033885	208.682	0.750067	0.158127	4.74345	2.10E-06	4.15E-05	245.47	248.987	291.193	168.071	140.11	158.259	Pxk	PX domain containing serine/threonine kinase [Source:MGI Symbol;Acc:MGI:1289230]
ENSMUSG00000038388	168.91	0.750616	0.179178	4.18921	2.80E-05	0.000451702	219.782	197.806	218.772	147.358	120.576	109.169	Pals2	protein associated with LIN7 2, MAGUK family member [Source:MGI Symbol;Acc:MGI:1927340]
ENSMUSG00000037905	266.748	0.751251	0.143289	5.24292	1.58E-07	3.84E-06	322.537	345.815	336.457	229.026	188.61	178.041	Bri3bp	Bri3 binding protein [Source:MGI Symbol;Acc:MGI:1924059]
ENSMUSG00000042688	701.534	0.753889	0.0949276	7.94173	1.99E-15	1.15E-13	964.756	874.219	802.668	531.436	474.893	561.232	Mapk6	mitogen-activated protein kinase 6 [Source:MGI Symbol;Acc:MGI:1354946]
ENSMUSG00000013822	131.86	0.754533	0.197408	3.82221	0.000132264	0.00177109	168.404	159.075	168.983	93.5043	86.8953	114.298	Elof1	ELF1 homolog, elongation factor 1 [Source:MGI Symbol;Acc:MGI:1913376]
ENSMUSG00000031027	255.847	0.757163	0.172663	4.38522	1.16E-05	0.000204556	298.275	402.528	262.527	158.01	194.672	219.071	Stk33	serine/threonine kinase 33 [Source:MGI Symbol;Acc:MGI:2152419]
ENSMUSG00000055239	338.04	0.757825	0.168964	4.48512	7.29E-06	0.000133206	333.954	554.687	386.246	300.042	236.436	216.873	Kcmf1	potassium channel modulatory factor 1 [Source:MGI Symbol;Acc:MGI:1921537]
ENSMUSG00000049577	103.526	0.760224	0.22313	3.4071	0.000656573	0.00709099	144.142	107.894	138.807	83.4437	71.4023	75.4659	Zfpm1	zinc finger protein, multitype 1 [Source:MGI Symbol;Acc:MGI:1095400]
ENSMUSG00000063065	219.5	0.760353	0.186169	4.08422	4.42E-05	0.00068554	206.937	279.418	342.492	176.356	179.179	132.615	Mapk3	mitogen-activated protein kinase 3 [Source:MGI Symbol;Acc:MGI:1346859]
ENSMUSG00000049653	766.813	0.760627	0.0801031	9.4956	2.19E-21	1.77E-19	911.951	975.197	1006.35	571.086	569.198	567.093	Spatc1	spermatogenesis and centriole associated 1 [Source:MGI Symbol;Acc:MGI:1921531]
ENSMUSG00000039782	526.335	0.763091	0.102706	7.42986	1.09E-13	5.24E-12	619.384	633.532	734.773	381.711	414.942	373.666	Cpeb2	cytoplasmic polyadenylation element binding protein 2 [Source:MGI Symbol;Acc:MGI:2442640]
ENSMUSG00000030126	185.803	0.763773	0.167265	4.56625	4.97E-06	9.37E-05	261.169	222.705	217.263	127.237	134.048	152.397	Tmcc1	transmembrane and coiled coil domains 1 [Source:MGI Symbol;Acc:MGI:2442368]
ENSMUSG00000049760	488.769	0.76453	0.105317	7.2593	3.89E-13	1.77E-11	626.52	590.651	629.159	352.121	400.796	333.369	Micos13	mitochondrial contact site and cristae organizing system subunit 13 [Source:MGI Symbol;Acc:MGI:2442174]
ENSMUSG00000041297	127.192	0.7654	0.245034	3.12365	0.00178625	0.0163252	195.52	100.978	184.07	79.3011	113.166	90.1195	Cdk13	cyclin dependent kinase 13 [Source:MGI Symbol;Acc:MGI:1916812]
ENSMUSG00000047502	1050.6	0.766198	0.0790059	9.69798	3.08E-22	2.62E-20	1180.26	1337.61	1452.95	795.378	790.815	746.6	Mroh7	maestro heat-like repeat family member 7 [Source:MGI Symbol;Acc:MGI:2685873]
ENSMUSG00000030224	69.672	0.766413	0.273895	2.79819	0.00513892	0.0373748	68.5034	98.2114	96.5616	48.5275	58.6038	47.6241	Strap	serine/threonine kinase receptor associated protein [Source:MGI Symbol;Acc:MGI:1329037]
ENSMUSG00000024160	155.68	0.767502	0.234938	3.26682	0.00108763	0.0108921	258.315	195.039	134.281	85.8109	119.228	141.407	Spsb3	splA/ryanodine receptor domain and SOCS box containing 3 [Source:MGI Symbol;Acc:MGI:1891471]
ENSMUSG00000027927	863.76	0.772303	0.0907263	8.51245	1.70E-17	1.11E-15	1044.68	1167.47	1057.65	674.651	686.406	551.707	Lelp1	late cornified envelope-like proline-rich 1 [Source:MGI Symbol;Acc:MGI:1916582]
ENSMUSG00000030077	1629.94	0.772484	0.0648476	11.9123	1.02E-32	1.41E-30	2043.68	1957.31	2166.6	1161.7	1141.76	1308.56	Chl1	cell adhesion molecule L1-like [Source:MGI Symbol;Acc:MGI:1098266]
ENSMUSG00000037012	9767.15	0.774022	0.0295491	26.1945	3.07E-151	6.34E-148	12403.4	12049.6	12528.9	7199.24	7471.65	6950.19	Hk1	hexokinase 1 [Source:MGI Symbol;Acc:MGI:96103]
ENSMUSG00000028458	1832.51	0.776752	0.0567848	13.6789	1.36E-42	2.39E-40	2413.32	2280.99	2249.58	1422.69	1290.63	1337.87	Tesk1	testis specific protein kinase 1 [Source:MGI Symbol;Acc:MGI:1201675]
ENSMUSG00000071252	112.295	0.77933	0.247372	3.15043	0.00163029	0.0151683	117.027	179.824	128.246	59.1799	94.9786	94.5156	2210408I21Rik	RIKEN cDNA 2210408I21 gene [Source:MGI Symbol;Acc:MGI:1919621]
ENSMUSG00000030556	477.243	0.780252	0.109407	7.13163	9.92E-13	4.38E-11	570.861	659.814	577.861	328.449	338.151	388.32	Lrrc28	leucine rich repeat containing 28 [Source:MGI Symbol;Acc:MGI:1915689]
ENSMUSG00000041164	605.937	0.783486	0.0982829	7.97174	1.56E-15	9.10E-14	739.265	811.973	748.352	431.422	495.775	408.835	Zmiz2	zinc finger, MIZ-type containing 2 [Source:MGI Symbol;Acc:MGI:106374]
ENSMUSG00000016626	106.241	0.785067	0.2287	3.43274	0.000597508	0.00658728	139.861	123.11	140.316	80.4847	60.6246	93.0502	Nlrp14	NLR family, pyrin domain containing 14 [Source:MGI Symbol;Acc:MGI:1924108]
ENSMUSG00000015745	153.294	0.786193	0.197779	3.9751	7.03E-05	0.00103604	175.54	244.837	161.439	115.401	102.388	120.159	Plekho1	pleckstrin homology domain containing, family O member 1 [Source:MGI Symbol;Acc:MGI:1914470]
ENSMUSG00000041566	288.118	0.78798	0.151876	5.18831	2.12E-07	5.01E-06	299.702	408.061	386.246	191.151	197.367	246.18	Tssk1	testis-specific serine kinase 1 [Source:MGI Symbol;Acc:MGI:1347557]
ENSMUSG00000032399	76.659	0.788384	0.282427	2.79146	0.00524709	0.037961	105.609	96.8281	89.0177	55.6291	74.7704	38.0993	Rpl4	ribosomal protein L4 [Source:MGI Symbol;Acc:MGI:1915141]
ENSMUSG00000030041	144.105	0.790026	0.199143	3.96712	7.27E-05	0.00106705	191.239	201.956	153.895	87.5863	109.798	120.159	M1ap	meiosis 1 associated protein [Source:MGI Symbol;Acc:MGI:1315200]
ENSMUSG00000029014	142.309	0.790117	0.195383	4.04394	5.26E-05	0.000795342	198.374	188.123	153.895	92.3207	101.715	119.427	Dnajc2	DnaJ heat shock protein family (Hsp40) member C2 [Source:MGI Symbol;Acc:MGI:99470]
ENSMUSG00000038369	152.084	0.790962	0.202141	3.91293	9.12E-05	0.00129441	142.715	237.92	197.649	117.768	105.083	111.367	Ncoa6	nuclear receptor coactivator 6 [Source:MGI Symbol;Acc:MGI:1929915]
ENSMUSG00000019578	1684.24	0.792937	0.0557935	14.212	7.72E-46	1.59E-43	2056.53	2144.05	2207.34	1223.84	1268.4	1205.26	Ubxn6	UBX domain protein 6 [Source:MGI Symbol;Acc:MGI:1913780]
ENSMUSG00000033319	393.224	0.794519	0.116866	6.79855	1.06E-11	4.45E-10	496.649	513.189	485.825	255.065	311.88	296.735	Fem1c	fem 1 homolog c [Source:MGI Symbol;Acc:MGI:2444737]
ENSMUSG00000029203	306.014	0.795773	0.129481	6.14586	7.95E-10	2.65E-08	412.447	402.528	350.036	227.843	234.415	208.813	Ube2k	ubiquitin-conjugating enzyme E2K [Source:MGI Symbol;Acc:MGI:1858216]
ENSMUSG00000037995	82.8773	0.797213	0.289205	2.75657	0.0058412	0.0413185	88.4835	103.744	123.719	60.3635	82.8537	38.0993	Igsf9	immunoglobulin superfamily, member 9 [Source:MGI Symbol;Acc:MGI:2135283]
ENSMUSG00000058935	427.188	0.801363	0.123103	6.50969	7.53E-11	3.02E-09	552.308	579.585	496.387	331.999	260.686	342.161	Tex48	testis expressed 48 [Source:MGI Symbol;Acc:MGI:1922774]
ENSMUSG00000020472	413.364	0.802237	0.112255	7.14654	8.90E-13	3.95E-11	577.997	509.039	488.843	289.39	315.248	299.666	Zkscan17	zinc finger with KRAB and SCAN domains 17 [Source:MGI Symbol;Acc:MGI:2679270]
ENSMUSG00000034297	84.1944	0.803808	0.261482	3.07404	0.00211179	0.0186207	107.036	118.96	95.0528	52.6701	80.1592	51.2875	Med13	mediator complex subunit 13 [Source:MGI Symbol;Acc:MGI:3029632]
ENSMUSG00000048206	287.755	0.80412	0.162807	4.93911	7.85E-07	1.68E-05	332.527	468.925	295.72	214.231	187.263	227.863	Dnajb8	DnaJ heat shock protein family (Hsp40) member B8 [Source:MGI Symbol;Acc:MGI:1922801]
ENSMUSG00000039361	277.784	0.804184	0.146406	5.49283	3.96E-08	1.03E-06	338.235	414.978	306.281	199.436	220.943	186.833	Picalm	phosphatidylinositol binding clathrin assembly protein [Source:MGI Symbol;Acc:MGI:2385902]
ENSMUSG00000038538	89.7978	0.808901	0.236013	3.42736	0.000609481	0.00667843	101.328	130.026	111.649	69.8323	59.2774	66.6738	Ubn2	ubinuclein 2 [Source:MGI Symbol;Acc:MGI:2444236]
ENSMUSG00000001829	2296.41	0.809344	0.0509959	15.8708	1.01E-56	2.78E-54	2855.73	2889.63	3026.6	1658.22	1596.45	1751.83	Clpb	ClpB caseinolytic peptidase B [Source:MGI Symbol;Acc:MGI:1100517]
ENSMUSG00000021096	625.48	0.809632	0.104018	7.78357	7.05E-15	3.81E-13	807.769	737.277	846.422	514.274	449.296	397.845	Ppm1a	protein phosphatase 1A, magnesium dependent, alpha isoform [Source:MGI Symbol;Acc:MGI:99878]
ENSMUSG00000026558	57.7297	0.810699	0.301019	2.69318	0.00707738	0.0481247	65.649	91.2951	63.3685	35.508	45.1317	45.4261	Uck2	uridine-cytidine kinase 2 [Source:MGI Symbol;Acc:MGI:1931744]
ENSMUSG00000036918	763.496	0.81124	0.0812662	9.9825	1.82E-23	1.67E-21	1027.55	966.898	923.37	550.373	569.872	542.915	Ttc7	tetratricopeptide repeat domain 7 [Source:MGI Symbol;Acc:MGI:1920999]
ENSMUSG00000040669	592.509	0.813206	0.0910273	8.93365	4.12E-19	2.99E-17	750.683	722.061	793.615	436.156	437.845	414.696	Phc1	polyhomeotic 1 [Source:MGI Symbol;Acc:MGI:103248]
ENSMUSG00000008429	301.038	0.815203	0.156886	5.19615	2.03E-07	4.86E-06	338.235	421.894	390.773	170.438	260.686	224.2	Herpud2	HERPUD family member 2 [Source:MGI Symbol;Acc:MGI:1915393]
ENSMUSG00000031667	111.702	0.81629	0.237042	3.44365	0.000573914	0.00636467	117.027	172.907	137.298	68.0569	102.388	72.5352	Aktip	AKT interacting protein [Source:MGI Symbol;Acc:MGI:3693832]
ENSMUSG00000046196	673.259	0.821701	0.0868059	9.46596	2.91E-21	2.31E-19	884.835	867.303	828.317	516.049	466.81	476.241	Ttc39d	tetratricopeptide repeat domain 39D [Source:MGI Symbol;Acc:MGI:1914987]
ENSMUSG00000029192	221.009	0.822288	0.158614	5.18422	2.17E-07	5.09E-06	246.897	271.119	328.913	147.358	160.318	171.447	Tbc1d14	TBC1 domain family, member 14 [Source:MGI Symbol;Acc:MGI:1098708]
ENSMUSG00000047515	144.291	0.82321	0.23227	3.5442	0.000393812	0.00460861	151.278	136.943	265.544	112.442	105.756	93.7829	BC049715	cDNA sequence BC049715 [Source:MGI Symbol;Acc:MGI:3605234]
ENSMUSG00000021850	90.5141	0.825953	0.242168	3.41067	0.000648046	0.00701724	114.172	130.026	102.597	53.2619	73.4232	69.6045	Ccdc198	coiled-coil domain containing 198 [Source:MGI Symbol;Acc:MGI:1914332]
ENSMUSG00000024663	723.582	0.828001	0.084987	9.74268	1.98E-22	1.74E-20	901.961	911.567	964.107	543.272	484.997	535.588	Rab3il1	RAB3A interacting protein (rabin3)-like 1 [Source:MGI Symbol;Acc:MGI:1922010]
ENSMUSG00000057531	75.0304	0.829919	0.276214	3.00463	0.00265906	0.022236	122.735	87.1453	78.4563	63.3225	54.5622	43.9607	Dtnbp1	dystrobrevin binding protein 1 [Source:MGI Symbol;Acc:MGI:2137586]
ENSMUSG00000036087	526.321	0.83059	0.101048	8.21978	2.04E-16	1.27E-14	697.878	710.995	612.562	391.179	390.692	354.616	Slain2	SLAIN motif family, member 2 [Source:MGI Symbol;Acc:MGI:1923241]
ENSMUSG00000090369	2212.76	0.831265	0.0605813	13.7215	7.55E-43	1.39E-40	2831.47	2913.14	2753.51	1481.87	1760.14	1536.43	4933411K16Rik	RIKEN cDNA 4933411K16 gene [Source:MGI Symbol;Acc:MGI:1914015]
ENSMUSG00000030206	2963.4	0.833199	0.047465	17.554	5.55E-69	1.99E-66	3629.25	3747.25	4014.85	2205.04	2117.15	2066.89	Gsg1	germ cell associated 1 [Source:MGI Symbol;Acc:MGI:1194499]
ENSMUSG00000074212	331.907	0.834789	0.136124	6.13257	8.65E-10	2.86E-08	455.262	349.964	470.738	220.149	241.825	253.507	Dnajb14	DnaJ heat shock protein family (Hsp40) member B14 [Source:MGI Symbol;Acc:MGI:1917854]
ENSMUSG00000071226	92.6513	0.834867	0.255546	3.26699	0.00108696	0.0108921	105.609	127.26	123.719	86.4027	49.1733	63.743	Cecr2	CECR2, histone acetyl-lysine reader [Source:MGI Symbol;Acc:MGI:1923799]
ENSMUSG00000042662	105.426	0.835819	0.251855	3.31865	0.000904525	0.00937665	139.861	157.691	107.123	53.2619	80.8328	93.7829	Dusp15	dual specificity phosphatase-like 15 [Source:MGI Symbol;Acc:MGI:1934928]
ENSMUSG00000021959	78.6249	0.836323	0.245379	3.40829	0.000653711	0.00706932	98.4736	96.8281	107.123	55.0373	58.6038	55.6836	Lats2	large tumor suppressor 2 [Source:MGI Symbol;Acc:MGI:1354386]
ENSMUSG00000042350	279.02	0.838101	0.154163	5.43646	5.43E-08	1.40E-06	311.119	403.912	357.58	173.989	187.936	239.586	Arel1	apoptosis resistant E3 ubiquitin protein ligase 1 [Source:MGI Symbol;Acc:MGI:1915747]
ENSMUSG00000020882	146.31	0.840819	0.234183	3.59044	0.000330123	0.00395286	186.957	250.37	125.228	83.4437	113.166	118.694	Cacnb1	calcium channel, voltage-dependent, beta 1 subunit [Source:MGI Symbol;Acc:MGI:102522]
ENSMUSG00000035295	100.984	0.841238	0.234731	3.58384	0.000338577	0.00403654	97.0464	141.092	150.877	76.9339	66.6871	73.2679	Wdr38	WD repeat domain 38 [Source:MGI Symbol;Acc:MGI:1923896]
ENSMUSG00000057367	63.4114	0.844088	0.29588	2.8528	0.00433358	0.0328477	79.9206	103.744	60.351	42.6095	41.09	52.7529	Birc2	baculoviral IAP repeat-containing 2 [Source:MGI Symbol;Acc:MGI:1197009]
ENSMUSG00000041161	172.408	0.847171	0.177198	4.78092	1.74E-06	3.52E-05	235.48	186.74	242.913	118.952	136.069	114.298	Otud3	OTU domain containing 3 [Source:MGI Symbol;Acc:MGI:1920412]
ENSMUSG00000040852	689.619	0.84806	0.0875258	9.68926	3.35E-22	2.82E-20	864.855	946.149	847.931	465.746	512.615	500.42	Plekhh2	pleckstrin homology domain containing, family H (with MyTH4 domain) member 2 [Source:MGI Symbol;Acc:MGI:2146813]
ENSMUSG00000037568	183.218	0.848253	0.175099	4.84441	1.27E-06	2.62E-05	226.917	221.321	258	110.666	130.006	152.397	Vash2	vasohibin 2 [Source:MGI Symbol;Acc:MGI:2444826]
ENSMUSG00000036196	119.372	0.850178	0.254435	3.34143	0.000833472	0.00879903	101.328	215.788	143.334	76.3421	101.041	78.3966	Slc26a8	solute carrier family 26, member 8 [Source:MGI Symbol;Acc:MGI:2385046]
ENSMUSG00000027520	79.9646	0.851572	0.282138	3.01829	0.00254209	0.0215192	114.172	113.427	81.4738	74.5667	56.583	39.5647	Zdbf2	zinc finger, DBF-type containing 2 [Source:MGI Symbol;Acc:MGI:1921134]
ENSMUSG00000033705	116.634	0.853497	0.25314	3.37164	0.000747221	0.00796585	194.093	118.96	137.298	65.0979	111.819	72.5352	Stard9	StAR related lipid transfer domain containing 9 [Source:MGI Symbol;Acc:MGI:3045258]
ENSMUSG00000031620	175.32	0.856183	0.18219	4.6994	2.61E-06	5.10E-05	262.596	178.44	236.878	124.87	133.374	115.763	Iqcm	IQ motif containing M [Source:MGI Symbol;Acc:MGI:1919081]
ENSMUSG00000024759	1193.96	0.858034	0.0698066	12.2916	1.01E-34	1.54E-32	1481.38	1527.12	1609.86	907.82	801.592	835.986	Atl3	atlastin GTPase 3 [Source:MGI Symbol;Acc:MGI:1924270]
ENSMUSG00000029707	833.738	0.861894	0.0844194	10.2097	1.79E-24	1.72E-22	963.328	1085.86	1178.35	593.575	598.837	582.48	Fscn3	fascin actin-bundling protein 3 [Source:MGI Symbol;Acc:MGI:1890386]
ENSMUSG00000037646	177.723	0.861993	0.182602	4.72062	2.35E-06	4.64E-05	191.239	282.185	214.246	122.502	136.742	119.427	Vps13b	vacuolar protein sorting 13B [Source:MGI Symbol;Acc:MGI:1916380]
ENSMUSG00000008200	72.058	0.863161	0.278446	3.09992	0.00193574	0.0175171	105.609	80.229	93.544	60.3635	55.2358	37.3666	Fnbp4	formin binding protein 4 [Source:MGI Symbol;Acc:MGI:1860513]
ENSMUSG00000059834	374.621	0.864195	0.138871	6.223	4.88E-10	1.69E-08	582.278	468.925	399.825	284.655	276.852	235.19	Sclt1	sodium channel and clathrin linker 1 [Source:MGI Symbol;Acc:MGI:1914411]
ENSMUSG00000051437	985.016	0.864368	0.0795953	10.8595	1.80E-27	1.98E-25	1220.22	1300.26	1296.04	749.81	718.065	625.708	Ubqlnl	ubiquilin-like [Source:MGI Symbol;Acc:MGI:2685336]
ENSMUSG00000019952	137.828	0.865378	0.205101	4.21927	2.45E-05	0.000400186	194.093	139.709	200.667	106.524	101.715	84.2581	Poc1b	POC1 centriolar protein B [Source:MGI Symbol;Acc:MGI:1918511]
ENSMUSG00000036555	363.55	0.866686	0.116656	7.42943	1.09E-13	5.24E-12	456.689	496.59	455.65	272.819	243.846	255.705	Iqce	IQ motif containing E [Source:MGI Symbol;Acc:MGI:1921489]
ENSMUSG00000024014	173.771	0.86774	0.181804	4.77295	1.82E-06	3.64E-05	242.616	243.454	187.088	126.645	105.083	137.744	Pim1	proviral integration site 1 [Source:MGI Symbol;Acc:MGI:97584]
ENSMUSG00000039844	215.738	0.867839	0.164958	5.26098	1.43E-07	3.49E-06	329.672	276.652	229.334	144.991	148.194	165.585	Rapgef1	Rap guanine nucleotide exchange factor (GEF) 1 [Source:MGI Symbol;Acc:MGI:104580]
ENSMUSG00000042797	921.745	0.870045	0.0733769	11.8572	1.97E-32	2.67E-30	1181.68	1159.17	1234.18	661.632	627.802	666.005	Aqp11	aquaporin 11 [Source:MGI Symbol;Acc:MGI:1913583]
ENSMUSG00000028758	1804.87	0.872488	0.0573086	15.2244	2.44E-52	5.92E-50	2351.95	2221.51	2432.14	1330.96	1218.56	1274.13	Kif17	kinesin family member 17 [Source:MGI Symbol;Acc:MGI:1098229]
ENSMUSG00000004798	348.393	0.873568	0.141552	6.17133	6.77E-10	2.29E-08	503.785	450.942	396.808	243.229	205.45	290.141	Ulk2	unc-51 like kinase 2 [Source:MGI Symbol;Acc:MGI:1352758]
ENSMUSG00000021258	443.057	0.873696	0.10916	8.00381	1.21E-15	7.07E-14	583.706	582.352	553.72	303.593	345.56	289.408	Ccnk	cyclin K [Source:MGI Symbol;Acc:MGI:1276106]
ENSMUSG00000038485	1967.15	0.876354	0.0536581	16.3322	5.83E-60	1.78E-57	2531.77	2499.55	2611.69	1429.2	1419.96	1310.76	Socs7	suppressor of cytokine signaling 7 [Source:MGI Symbol;Acc:MGI:2651588]
ENSMUSG00000022412	111.343	0.878894	0.220447	3.98687	6.70E-05	0.000994877	117.027	146.625	168.983	72.7913	75.444	87.1888	Mief1	mitochondrial elongation factor 1 [Source:MGI Symbol;Acc:MGI:2146020]
ENSMUSG00000007950	226.811	0.880435	0.151655	5.80551	6.42E-09	1.86E-07	305.411	289.101	286.667	144.399	153.582	181.704	Abhd8	abhydrolase domain containing 8 [Source:MGI Symbol;Acc:MGI:1918946]
ENSMUSG00000029705	314.839	0.881287	0.143763	6.13013	8.78E-10	2.88E-08	346.798	441.259	436.036	224.292	188.61	252.041	Cux1	cut-like homeobox 1 [Source:MGI Symbol;Acc:MGI:88568]
ENSMUSG00000042888	748.904	0.881433	0.0868621	10.1475	3.40E-24	3.23E-22	971.891	929.55	1010.88	492.969	575.26	512.875	Prr30	proline rich 30 [Source:MGI Symbol;Acc:MGI:1923877]
ENSMUSG00000045467	421.161	0.887366	0.124755	7.11287	1.14E-12	4.99E-11	555.163	547.77	537.124	313.062	240.478	333.369	Ttll13	tubulin tyrosine ligase-like family, member 13 [Source:MGI Symbol;Acc:MGI:1920845]
ENSMUSG00000063972	186.284	0.890478	0.170646	5.21828	1.81E-07	4.35E-06	211.219	257.286	258	147.358	118.555	125.288	Nr6a1	nuclear receptor subfamily 6, group A, member 1 [Source:MGI Symbol;Acc:MGI:1352459]
ENSMUSG00000036002	199.606	0.890614	0.168925	5.27224	1.35E-07	3.30E-06	279.722	276.652	221.79	159.194	123.27	137.011	Atosb	atos homolog B [Source:MGI Symbol;Acc:MGI:2441854]
ENSMUSG00000041477	85.7536	0.891393	0.273253	3.26216	0.00110568	0.0110461	117.027	81.6123	135.79	64.5061	43.7845	71.8025	Dcp1b	decapping mRNA 1B [Source:MGI Symbol;Acc:MGI:2442404]
ENSMUSG00000028287	1530.47	0.891849	0.0676925	13.175	1.22E-39	2.06E-37	1796.79	2124.69	2044.39	1039.79	1048.13	1129.06	1700009N14Rik	RIKEN cDNA 1700009N14 gene [Source:MGI Symbol;Acc:MGI:1922721]
ENSMUSG00000023007	150.599	0.892936	0.180255	4.95374	7.28E-07	1.57E-05	199.801	199.189	188.597	115.993	100.367	99.6443	Prpf40b	pre-mRNA processing factor 40B [Source:MGI Symbol;Acc:MGI:1925583]
ENSMUSG00000037622	951.192	0.894074	0.0851726	10.4972	8.90E-26	9.07E-24	1220.22	1394.32	1095.37	672.876	680.343	644.025	Wdtc1	WD and tetratricopeptide repeats 1 [Source:MGI Symbol;Acc:MGI:2685541]
ENSMUSG00000036257	186.013	0.894555	0.213698	4.18608	2.84E-05	0.000457092	308.265	174.291	242.913	100.606	160.318	129.684	Pnpla8	patatin-like phospholipase domain containing 8 [Source:MGI Symbol;Acc:MGI:1914702]
ENSMUSG00000012819	58.4639	0.898329	0.322086	2.7891	0.00528555	0.038139	55.659	110.661	61.8597	43.7931	37.0484	41.7627	Cdh23	cadherin related 23 (otocadherin) [Source:MGI Symbol;Acc:MGI:1890219]
ENSMUSG00000020622	1685.8	0.899381	0.0602482	14.9279	2.17E-50	4.98E-48	2059.38	2358.46	2166.6	1177.68	1202.39	1150.31	Nt5c1b	5'-nucleotidase, cytosolic IB [Source:MGI Symbol;Acc:MGI:1918131]
ENSMUSG00000090141	165.463	0.899962	0.196587	4.57793	4.70E-06	8.89E-05	185.53	211.639	248.948	109.483	94.305	142.872	Gm614	predicted gene 614 [Source:MGI Symbol;Acc:MGI:2685460]
ENSMUSG00000010461	236.816	0.900468	0.158551	5.67937	1.35E-08	3.76E-07	296.848	265.586	363.615	174.581	174.464	145.803	Eya4	EYA transcriptional coactivator and phosphatase 4 [Source:MGI Symbol;Acc:MGI:1337104]
ENSMUSG00000040451	442.856	0.901408	0.120313	7.49222	6.77E-14	3.37E-12	590.841	590.651	547.685	272.819	290.998	364.141	Sgms1	sphingomyelin synthase 1 [Source:MGI Symbol;Acc:MGI:2444110]
ENSMUSG00000030403	318.566	0.901947	0.145694	6.19068	5.99E-10	2.04E-08	402.457	388.696	454.141	201.212	271.464	193.427	Vasp	vasodilator-stimulated phosphoprotein [Source:MGI Symbol;Acc:MGI:109268]
ENSMUSG00000058709	1167.5	0.904839	0.0837692	10.8016	3.38E-27	3.64E-25	1519.92	1557.55	1486.14	720.811	782.731	937.829	Egln2	egl-9 family hypoxia-inducible factor 2 [Source:MGI Symbol;Acc:MGI:1932287]
ENSMUSG00000022253	60.4062	0.907359	0.29655	3.05972	0.00221544	0.0192876	91.3378	82.9955	61.8597	36.0998	49.8469	40.2973	Nadk2	NAD kinase 2, mitochondrial [Source:MGI Symbol;Acc:MGI:1915896]
ENSMUSG00000038298	723.031	0.907713	0.0829691	10.9404	7.39E-28	8.60E-26	913.378	933.7	983.721	523.151	498.469	485.766	Pdzk1	PDZ domain containing 1 [Source:MGI Symbol;Acc:MGI:1928901]
ENSMUSG00000056260	51.3841	0.91449	0.328452	2.78424	0.00536526	0.0385794	72.7848	44.2643	84.4914	33.1408	37.722	35.9013	Lrif1	ligand dependent nuclear receptor interacting factor 1 [Source:MGI Symbol;Acc:MGI:2445214]
ENSMUSG00000035621	112.201	0.916253	0.240481	3.81009	0.000138914	0.00185414	114.172	186.74	138.807	64.5061	94.9786	74.0006	Midn	midnolin [Source:MGI Symbol;Acc:MGI:1890222]
ENSMUSG00000025983	248.82	0.916325	0.162813	5.62809	1.82E-08	4.97E-07	359.643	315.383	300.246	168.663	139.437	209.546	Ccdc150	coiled-coil domain containing 150 [Source:MGI Symbol;Acc:MGI:1925266]
ENSMUSG00000036432	145.182	0.917026	0.187402	4.89336	9.91E-07	2.07E-05	212.646	193.656	162.948	97.0551	104.409	100.377	Siah2	siah E3 ubiquitin protein ligase 2 [Source:MGI Symbol;Acc:MGI:108062]
ENSMUSG00000035696	1031.29	0.918756	0.0804197	11.4245	3.15E-30	3.89E-28	1358.65	1392.94	1294.53	659.856	798.898	682.857	Rnf38	ring finger protein 38 [Source:MGI Symbol;Acc:MGI:1920719]
ENSMUSG00000031849	490.238	0.919934	0.103833	8.85976	8.02E-19	5.76E-17	629.375	655.665	638.212	305.96	350.276	361.943	Comp	cartilage oligomeric matrix protein [Source:MGI Symbol;Acc:MGI:88469]
ENSMUSG00000034595	57.0412	0.921505	0.330003	2.79242	0.00523159	0.037882	84.202	88.5285	51.2983	50.3029	27.6179	40.2973	Ppp1r18	protein phosphatase 1, regulatory subunit 18 [Source:MGI Symbol;Acc:MGI:1923698]
ENSMUSG00000041629	145.078	0.92567	0.211239	4.38209	1.18E-05	0.000206193	161.268	183.973	224.807	78.1175	121.923	100.377	Vcf1	VCP nuclear cofactor family member 1 [Source:MGI Symbol;Acc:MGI:106351]
ENSMUSG00000038057	6108.6	0.925781	0.0367134	25.2164	2.65E-140	3.65E-137	8473.01	7659.1	7878.82	4175.74	4182.43	4282.51	Dbil5	diazepam binding inhibitor-like 5 [Source:MGI Symbol;Acc:MGI:108039]
ENSMUSG00000039652	481.987	0.929682	0.107576	8.64211	5.52E-18	3.77E-16	676.471	556.07	663.861	324.898	323.331	347.29	Cpeb3	cytoplasmic polyadenylation element binding protein 3 [Source:MGI Symbol;Acc:MGI:2443075]
ENSMUSG00000041040	55.5879	0.930053	0.307987	3.01978	0.00252961	0.0214796	79.9206	84.3788	54.3159	36.6916	43.7845	34.4359	Fam117b	family with sequence similarity 117, member B [Source:MGI Symbol;Acc:MGI:1920000]
ENSMUSG00000027244	45.2618	0.933938	0.342512	2.72673	0.00639657	0.0443359	75.6391	48.4141	54.3159	36.0998	25.5971	31.5052	Atg13	autophagy related 13 [Source:MGI Symbol;Acc:MGI:1196429]
ENSMUSG00000029001	96.5932	0.935619	0.247003	3.78789	0.000151932	0.00199882	146.997	132.793	101.088	79.3011	67.3607	52.0202	Fbxo44	F-box protein 44 [Source:MGI Symbol;Acc:MGI:1354744]
ENSMUSG00000020234	70.6685	0.939507	0.294348	3.19183	0.00141376	0.0134568	104.182	66.3964	108.632	60.9553	46.4789	37.3666	Tektip1	tektin bundle interacting protein 1 [Source:MGI Symbol;Acc:MGI:1921072]
ENSMUSG00000034254	268.844	0.940623	0.151678	6.20144	5.59E-10	1.93E-08	346.798	420.511	292.702	176.356	199.388	177.308	Agpat1	1-acylglycerol-3-phosphate O-acyltransferase 1 [Source:MGI Symbol;Acc:MGI:1932075]
ENSMUSG00000036046	462.992	0.941251	0.10644	8.843	9.32E-19	6.58E-17	609.394	589.268	627.65	291.757	345.56	314.319	5031439G07Rik	RIKEN cDNA 5031439G07 gene [Source:MGI Symbol;Acc:MGI:2444899]
ENSMUSG00000017176	53.565	0.941655	0.325053	2.89692	0.0037684	0.0292618	64.2219	58.0969	89.0177	28.4064	46.4789	35.1686	Nt5c3b	5'-nucleotidase, cytosolic IIIB [Source:MGI Symbol;Acc:MGI:1915356]
ENSMUSG00000022558	514.061	0.942094	0.102859	9.15906	5.23E-20	3.93E-18	656.49	719.294	651.79	321.347	377.894	357.547	Mroh1	maestro heat-like repeat family member 1 [Source:MGI Symbol;Acc:MGI:2442558]
ENSMUSG00000006435	260.36	0.943776	0.169187	5.57831	2.43E-08	6.58E-07	356.788	276.652	395.299	189.376	204.103	139.942	Neurl1a	neuralized E3 ubiquitin protein ligase 1A [Source:MGI Symbol;Acc:MGI:1334263]
ENSMUSG00000018415	77.1736	0.943891	0.263679	3.57969	0.000344001	0.00409024	99.9007	124.493	79.965	50.8947	49.1733	58.6143	Gid4	GID complex subunit 4, VID24 homolog [Source:MGI Symbol;Acc:MGI:1914021]
ENSMUSG00000048271	60.5748	0.94425	0.299037	3.15764	0.00159053	0.0148486	101.328	78.8457	58.8422	42.0177	37.722	44.6934	Rbm33	RNA binding motif protein 33 [Source:MGI Symbol;Acc:MGI:1919670]
ENSMUSG00000015599	1282.59	0.945515	0.0666217	14.1923	1.02E-45	2.06E-43	1701.17	1603.2	1760.74	832.662	921.494	876.284	Ttbk1	tau tubulin kinase 1 [Source:MGI Symbol;Acc:MGI:2147036]
ENSMUSG00000028337	55.6326	0.947957	0.327638	2.89331	0.00381205	0.0294899	87.0563	85.762	46.772	38.467	30.3123	45.4261	Coro2a	coronin, actin binding protein 2A [Source:MGI Symbol;Acc:MGI:1345966]
ENSMUSG00000045252	803.175	0.948326	0.0843157	11.2473	2.39E-29	2.86E-27	981.881	1167.47	1024.46	556.291	540.906	548.044	Zfp574	zinc finger protein 574 [Source:MGI Symbol;Acc:MGI:2442951]
ENSMUSG00000037621	46.8719	0.94851	0.344953	2.74968	0.00596535	0.041981	64.2219	65.0132	55.8246	23.0802	43.7845	29.3071	Atoh8	atonal bHLH transcription factor 8 [Source:MGI Symbol;Acc:MGI:1918343]
ENSMUSG00000048696	1945.79	0.948799	0.0534411	17.7541	1.60E-70	6.62E-68	2434.72	2632.34	2623.76	1317.94	1364.73	1301.24	Mex3d	mex3 RNA binding family member D [Source:MGI Symbol;Acc:MGI:2681847]
ENSMUSG00000048827	152.331	0.949513	0.243094	3.90595	9.39E-05	0.0013278	251.179	226.854	123.719	85.8109	133.374	93.0502	Pkd1l3	polycystic kidney disease 1 like 3 [Source:MGI Symbol;Acc:MGI:2664670]
ENSMUSG00000043913	231.367	0.951163	0.18332	5.18854	2.12E-07	5.01E-06	242.616	329.216	342.492	118.36	181.874	173.645	Ccdc60	coiled-coil domain containing 60 [Source:MGI Symbol;Acc:MGI:2141043]
ENSMUSG00000028826	46.569	0.952017	0.335643	2.83639	0.0045626	0.0340318	67.0762	52.5638	64.8773	39.0587	31.6595	24.1784	Maco1	macoilin 1 [Source:MGI Symbol;Acc:MGI:1913396]
ENSMUSG00000022488	67.5314	0.952672	0.342259	2.78348	0.00537789	0.038603	132.725	62.2466	72.4212	62.7307	29.6387	45.4261	Nckap1l	NCK associated protein 1 like [Source:MGI Symbol;Acc:MGI:1926063]
ENSMUSG00000048249	109.751	0.955197	0.245745	3.88694	0.000101515	0.00141437	105.609	145.242	184.07	90.5453	61.9718	71.0698	Crebrf	CREB3 regulatory factor [Source:MGI Symbol;Acc:MGI:1924378]
ENSMUSG00000042328	84.2499	0.959215	0.252527	3.79846	0.000145597	0.00192468	107.036	125.877	101.088	62.1389	64.6663	44.6934	Hps4	HPS4, biogenesis of lysosomal organelles complex 3 subunit 2 [Source:MGI Symbol;Acc:MGI:2177742]
ENSMUSG00000050821	72.8655	0.96144	0.28237	3.40489	0.000661901	0.00711754	102.755	73.3127	113.158	52.6701	57.9302	37.3666	Fam131a	family with sequence similarity 131, member A [Source:MGI Symbol;Acc:MGI:1925658]
ENSMUSG00000018796	2416.5	0.962142	0.0477299	20.1581	2.29E-90	1.72E-87	3074.09	3246.51	3261.97	1685.44	1613.96	1617.02	Acsl1	acyl-CoA synthetase long-chain family member 1 [Source:MGI Symbol;Acc:MGI:102797]
ENSMUSG00000000942	69.5956	0.962665	0.28839	3.33807	0.000843631	0.00886778	124.162	73.3127	78.4563	43.7931	53.8886	43.9607	Hoxa4	homeobox A4 [Source:MGI Symbol;Acc:MGI:96176]
ENSMUSG00000027465	954.151	0.969986	0.0818989	11.8437	2.32E-32	3.09E-30	1237.34	1210.35	1344.32	679.977	676.301	576.618	Tbc1d20	TBC1 domain family, member 20 [Source:MGI Symbol;Acc:MGI:1914481]
ENSMUSG00000020435	2503.01	0.970246	0.0508031	19.0982	2.62E-81	1.35E-78	3118.33	3341.95	3482.25	1636.32	1737.91	1701.28	Osbp2	oxysterol binding protein 2 [Source:MGI Symbol;Acc:MGI:1921559]
ENSMUSG00000061411	214.91	0.976177	0.163692	5.9635	2.47E-09	7.53E-08	315.401	255.903	283.65	134.338	169.749	130.417	Nol4l	nucleolar protein 4-like [Source:MGI Symbol;Acc:MGI:1918765]
ENSMUSG00000029802	65.8315	0.976182	0.285526	3.41889	0.000628771	0.00682642	75.6391	76.0792	110.141	41.4259	40.4164	51.2875	Abcg2	ATP binding cassette subfamily G member 2 (Junior blood group) [Source:MGI Symbol;Acc:MGI:1347061]
ENSMUSG00000031647	482.025	0.976995	0.112328	8.69772	3.39E-18	2.33E-16	632.229	590.651	695.545	347.978	283.589	342.161	Mfap3l	microfibrillar-associated protein 3-like [Source:MGI Symbol;Acc:MGI:1918556]
ENSMUSG00000042772	169.373	0.9805	0.174705	5.61233	2.00E-08	5.43E-07	198.374	225.471	250.457	104.748	119.228	117.961	Smg7	SMG7 nonsense mediated mRNA decay factor [Source:MGI Symbol;Acc:MGI:2682334]
ENSMUSG00000035203	199.865	0.982029	0.171436	5.72826	1.01E-08	2.87E-07	261.169	240.687	294.211	115.993	159.645	127.486	Epn1	epsin 1 [Source:MGI Symbol;Acc:MGI:1333763]
ENSMUSG00000025162	335.862	0.982464	0.13535	7.25869	3.91E-13	1.77E-11	422.437	497.973	416.422	191.743	241.151	245.447	Csnk1d	casein kinase 1, delta [Source:MGI Symbol;Acc:MGI:1355272]
ENSMUSG00000068167	720.267	0.985935	0.096396	10.228	1.49E-24	1.44E-22	1024.7	997.329	847.931	434.972	504.532	512.142	Csnka2ip	casein kinase 2, alpha prime interacting protein [Source:MGI Symbol;Acc:MGI:2676295]
ENSMUSG00000003345	2338.2	0.989387	0.0594563	16.6406	3.54E-62	1.17E-59	3175.42	3288.01	2863.65	1535.13	1483.28	1683.7	Csnk1g2	casein kinase 1, gamma 2 [Source:MGI Symbol;Acc:MGI:1920014]
ENSMUSG00000026626	53.0735	0.990616	0.338393	2.92741	0.00341797	0.0271271	75.6391	66.3964	69.4036	26.631	27.6179	52.7529	Ppp2r5a	protein phosphatase 2, regulatory subunit B', alpha [Source:MGI Symbol;Acc:MGI:2388479]
ENSMUSG00000015363	47.4872	0.99215	0.333901	2.97139	0.00296455	0.0242027	49.9504	76.0792	63.3685	25.4474	36.3748	33.7032	Trabd	TraB domain containing [Source:MGI Symbol;Acc:MGI:1915226]
ENSMUSG00000008730	546.414	0.994324	0.127343	7.80823	5.80E-15	3.19E-13	616.53	917.1	648.773	366.916	382.609	346.557	Hipk1	homeodomain interacting protein kinase 1 [Source:MGI Symbol;Acc:MGI:1314873]
ENSMUSG00000020593	2016.15	0.996086	0.0558882	17.8228	4.70E-71	2.04E-68	2620.25	2701.5	2738.43	1438.66	1329.03	1269	Lpin1	lipin 1 [Source:MGI Symbol;Acc:MGI:1891340]
ENSMUSG00000030815	1810.49	0.997839	0.0518952	19.228	2.16E-82	1.27E-79	2424.73	2393.04	2420.07	1187.15	1224.62	1213.32	Phkg2	phosphorylase kinase, gamma 2 (testis) [Source:MGI Symbol;Acc:MGI:1916211]
ENSMUSG00000021414	483.28	1.00075	0.109274	9.15824	5.28E-20	3.93E-18	719.285	616.933	597.475	324.306	344.213	297.468	Fam217a	family with sequence similarity 217, member A [Source:MGI Symbol;Acc:MGI:1919114]
ENSMUSG00000030410	145.945	1.00341	0.189842	5.28553	1.25E-07	3.10E-06	189.811	178.44	215.755	89.3617	90.9369	111.367	Dmwd	dystrophia myotonica-containing WD repeat motif [Source:MGI Symbol;Acc:MGI:94907]
ENSMUSG00000059895	54.3408	1.00366	0.3731	2.69007	0.00714381	0.0484583	89.9106	78.8457	48.2808	24.8556	26.2707	57.8816	Ptp4a3	protein tyrosine phosphatase 4a3 [Source:MGI Symbol;Acc:MGI:1277098]
ENSMUSG00000041165	1147.99	1.00393	0.0672686	14.9242	2.29E-50	5.12E-48	1545.61	1545.1	1505.76	761.054	803.613	726.817	Spem1	spermatid maturation 1 [Source:MGI Symbol;Acc:MGI:1921538]
ENSMUSG00000026778	405.831	1.00814	0.125235	8.05002	8.28E-16	4.92E-14	482.378	634.916	508.457	269.86	249.235	290.141	Prkcq	protein kinase C, theta [Source:MGI Symbol;Acc:MGI:97601]
ENSMUSG00000092518	262.376	1.00831	0.168667	5.97813	2.26E-09	6.96E-08	353.934	312.616	386.246	211.864	179.179	130.417	Garin5b	golgi associated RAB2 interactor family member 5B [Source:MGI Symbol;Acc:MGI:3045311]
ENSMUSG00000029155	2182.71	1.00841	0.0571173	17.6551	9.30E-70	3.66E-67	2718.73	2933.89	3097.51	1493.7	1485.98	1366.45	Spata18	spermatogenesis associated 18 [Source:MGI Symbol;Acc:MGI:1920722]
ENSMUSG00000074063	486.091	1.00857	0.10642	9.47729	2.61E-21	2.09E-19	657.918	641.832	647.264	286.431	331.415	351.686	Osgin1	oxidative stress induced growth inhibitor 1 [Source:MGI Symbol;Acc:MGI:1919089]
ENSMUSG00000037552	58.328	1.01398	0.357268	2.83815	0.00453755	0.0339496	72.7848	96.8281	64.8773	58.5881	36.3748	20.515	Plekhg2	pleckstrin homology domain containing, family G (with RhoGef domain) member 2 [Source:MGI Symbol;Acc:MGI:2141874]
ENSMUSG00000059114	270.319	1.01475	0.144851	7.00547	2.46E-12	1.06E-10	406.739	345.815	331.93	176.356	160.318	200.754	Lrrc74a	leucine rich repeat containing 74A [Source:MGI Symbol;Acc:MGI:3646959]
ENSMUSG00000079652	1018.14	1.01634	0.0727645	13.9675	2.46E-44	4.62E-42	1434.29	1344.53	1309.62	706.016	643.968	670.401	Garin1a	golgi associated RAB2 interactor 1A [Source:MGI Symbol;Acc:MGI:2141439]
ENSMUSG00000020260	38.9959	1.0185	0.366653	2.77783	0.0054723	0.0391108	67.0762	45.6475	43.7545	21.3048	27.6179	28.5745	Pofut2	protein O-fucosyltransferase 2 [Source:MGI Symbol;Acc:MGI:1916863]
ENSMUSG00000033055	114.45	1.02299	0.22741	4.49843	6.85E-06	0.000125685	162.695	112.044	185.579	71.0159	74.7704	80.5947	Ankrd54	ankyrin repeat domain 54 [Source:MGI Symbol;Acc:MGI:2444209]
ENSMUSG00000058183	126.98	1.02354	0.271913	3.76423	0.000167064	0.00217026	174.113	154.925	182.562	127.829	74.0968	48.3568	Mmel1	membrane metallo-endopeptidase-like 1 [Source:MGI Symbol;Acc:MGI:1351603]
ENSMUSG00000008763	63.8663	1.02506	0.282976	3.62242	0.000291854	0.00352827	71.3577	81.6123	104.105	41.4259	45.1317	39.5647	Man1a2	mannosidase, alpha, class 1A, member 2 [Source:MGI Symbol;Acc:MGI:104676]
ENSMUSG00000022463	36.745	1.02829	0.365585	2.81271	0.00491257	0.0360779	54.2318	49.7973	43.7545	20.713	25.5971	26.3764	Srebf2	sterol regulatory element binding factor 2 [Source:MGI Symbol;Acc:MGI:107585]
ENSMUSG00000035601	40.1957	1.03262	0.346416	2.98086	0.00287442	0.0236538	57.0861	58.0969	46.772	26.631	26.9443	25.6438	Trmt10b	tRNA methyltransferase 10B [Source:MGI Symbol;Acc:MGI:1917184]
ENSMUSG00000027562	395.489	1.03698	0.153126	6.77207	1.27E-11	5.32E-10	463.825	471.691	659.334	217.782	244.519	315.785	Car2	carbonic anhydrase 2 [Source:MGI Symbol;Acc:MGI:88269]
ENSMUSG00000020610	312.717	1.0403	0.162673	6.395	1.61E-10	6.11E-09	512.348	374.863	374.176	161.561	210.839	242.517	Amz2	archaelysin family metallopeptidase 2 [Source:MGI Symbol;Acc:MGI:104837]
ENSMUSG00000109336	338.445	1.04336	0.129686	8.04524	8.61E-16	5.08E-14	386.759	486.907	493.369	209.497	227.006	227.13	Samd4b	sterile alpha motif domain containing 4B [Source:MGI Symbol;Acc:MGI:2448542]
ENSMUSG00000041852	410.797	1.0444	0.123641	8.4471	2.99E-17	1.93E-15	566.58	474.458	620.106	287.023	274.832	241.784	Tcf20	transcription factor 20 [Source:MGI Symbol;Acc:MGI:108399]
ENSMUSG00000118646	192.346	1.04848	0.190003	5.51825	3.42E-08	8.95E-07	303.984	189.506	285.158	140.848	123.944	110.634	Gm56820	predicted gene, 56820 [Source:MGI Symbol;Acc:MGI:7337553]
ENSMUSG00000045176	59.778	1.05278	0.28821	3.65284	0.000259353	0.00319056	87.0563	71.9294	82.9826	39.0587	33.6804	43.9607	Borcs6	BLOC-1 related complex subunit 6 [Source:MGI Symbol;Acc:MGI:1919173]
ENSMUSG00000050860	513.229	1.05496	0.101848	10.3581	3.85E-25	3.83E-23	675.043	647.365	757.405	346.794	334.783	317.983	Phospho1	phosphatase, orphan 1 [Source:MGI Symbol;Acc:MGI:2447348]
ENSMUSG00000029766	282.955	1.05716	0.134023	7.88788	3.07E-15	1.76E-13	381.05	398.378	366.632	176.948	171.77	202.952	1700012A03Rik	RIKEN cDNA 1700012A03 gene [Source:MGI Symbol;Acc:MGI:1923632]
ENSMUSG00000070639	1757.94	1.05987	0.054828	19.3308	2.96E-83	1.88E-80	2286.3	2388.89	2453.27	1120.87	1170.73	1127.59	Lrrc8b	leucine rich repeat containing 8 family, member B [Source:MGI Symbol;Acc:MGI:2141353]
ENSMUSG00000041009	171.828	1.06073	0.187916	5.64471	1.65E-08	4.56E-07	286.858	189.506	220.281	101.789	113.84	118.694	Iqcf4	IQ motif containing F4 [Source:MGI Symbol;Acc:MGI:1914570]
ENSMUSG00000032352	280.598	1.06535	0.168082	6.33826	2.32E-10	8.53E-09	371.06	383.163	384.737	147.358	240.478	156.793	Lrrc1	leucine rich repeat containing 1 [Source:MGI Symbol;Acc:MGI:2442313]
ENSMUSG00000048668	59.8792	1.06668	0.365214	2.92071	0.00349232	0.0275846	99.9007	62.2466	81.4738	50.3029	48.4997	16.8516	Rhno1	RAD9-HUS1-RAD1 interacting nuclear orphan 1 [Source:MGI Symbol;Acc:MGI:1915315]
ENSMUSG00000052906	64.8956	1.07156	0.329901	3.24811	0.00116174	0.0113859	67.0762	123.11	73.9299	55.0373	43.1109	27.1091	Ubxn8	UBX domain protein 8 [Source:MGI Symbol;Acc:MGI:1337129]
ENSMUSG00000068328	74.373	1.07209	0.277851	3.8585	0.000114087	0.00157	84.202	105.128	113.158	54.4455	34.354	54.9509	Aup1	ancient ubiquitous protein 1 [Source:MGI Symbol;Acc:MGI:107789]
ENSMUSG00000030200	1315.02	1.08304	0.0791233	13.688	1.20E-42	2.15E-40	1962.34	1694.49	1704.91	940.369	782.058	805.947	Bcl2l14	BCL2 like 14 [Source:MGI Symbol;Acc:MGI:1914063]
ENSMUSG00000042700	66.7206	1.09138	0.273806	3.98595	6.72E-05	0.000995137	101.328	92.6783	78.4563	42.6095	47.1525	38.0993	Sipa1l1	signal-induced proliferation-associated 1 like 1 [Source:MGI Symbol;Acc:MGI:2443679]
ENSMUSG00000046957	2597.85	1.09177	0.0549223	19.8784	6.26E-88	4.31E-85	3847.6	3383.45	3378.15	1632.77	1732.52	1612.63	Spz1	spermatogenic leucine zipper 1 [Source:MGI Symbol;Acc:MGI:1930801]
ENSMUSG00000070424	95.9407	1.09478	0.252794	4.33072	1.49E-05	0.000255343	99.9007	134.176	158.421	66.8733	69.3815	46.8914	Art5	ADP-ribosyltransferase 5 [Source:MGI Symbol;Acc:MGI:107948]
ENSMUSG00000000125	67.2769	1.09493	0.378841	2.89022	0.00384971	0.0296794	154.133	45.6475	75.4387	51.4865	49.8469	27.1091	Wnt3	wingless-type MMTV integration site family, member 3 [Source:MGI Symbol;Acc:MGI:98955]
ENSMUSG00000046516	36.4346	1.09949	0.378309	2.90634	0.00365683	0.0284757	49.9504	52.5638	46.772	30.1818	21.5554	17.5843	Cox17	cytochrome c oxidase assembly protein 17, copper chaperone [Source:MGI Symbol;Acc:MGI:1333806]
ENSMUSG00000064345	142.918	1.10035	0.226643	4.855	1.20E-06	2.49E-05	125.589	210.255	248.948	84.6273	94.305	93.7829	mt-Nd2	mitochondrially encoded NADH dehydrogenase 2 [Source:MGI Symbol;Acc:MGI:102500]
ENSMUSG00000041642	239.28	1.10179	0.157044	7.0158	2.29E-12	9.89E-11	268.305	325.066	386.246	153.276	148.194	154.595	Kif21b	kinesin family member 21B [Source:MGI Symbol;Acc:MGI:109234]
ENSMUSG00000005131	37.4796	1.10947	0.399095	2.77996	0.00543649	0.0389222	62.7947	27.6652	63.3685	24.2638	26.2707	20.515	4930550C14Rik	RIKEN cDNA 4930550C14 gene [Source:MGI Symbol;Acc:MGI:1922561]
ENSMUSG00000022663	41.2819	1.10969	0.376502	2.94736	0.00320498	0.0257583	74.212	33.1982	61.8597	23.0802	28.9651	26.3764	Atg3	autophagy related 3 [Source:MGI Symbol;Acc:MGI:1915091]
ENSMUSG00000055850	184.479	1.11249	0.183991	6.04644	1.48E-09	4.72E-08	222.636	247.603	286.667	124.278	91.6106	134.08	Rnf181	ring finger protein 181 [Source:MGI Symbol;Acc:MGI:1913760]
ENSMUSG00000095789	407.883	1.11357	0.142861	7.79479	6.45E-15	3.51E-13	530.901	669.497	472.246	215.415	298.408	260.834	Nupr2	nuclear protein transcriptional regulator 2 [Source:MGI Symbol;Acc:MGI:1923099]
ENSMUSG00000038696	42.7153	1.11362	0.345751	3.22086	0.00127807	0.0123502	69.9305	53.9471	51.2983	23.0802	31.6595	26.3764	Mapkap1	mitogen-activated protein kinase associated protein 1 [Source:MGI Symbol;Acc:MGI:2444554]
ENSMUSG00000067274	159.31	1.11687	0.193481	5.77252	7.81E-09	2.24E-07	256.888	231.004	165.965	95.8715	105.756	100.377	Rplp0	ribosomal protein lateral stalk subunit P0 [Source:MGI Symbol;Acc:MGI:1927636]
ENSMUSG00000033917	210.667	1.12236	0.170702	6.575	4.87E-11	1.99E-09	325.391	305.7	235.369	152.092	125.291	120.159	Gde1	glycerophosphodiester phosphodiesterase 1 [Source:MGI Symbol;Acc:MGI:1891827]
ENSMUSG00000032185	118.463	1.13233	0.248225	4.5617	5.07E-06	9.53E-05	135.58	132.793	220.281	77.5257	88.9161	55.6836	Carm1	coactivator-associated arginine methyltransferase 1 [Source:MGI Symbol;Acc:MGI:1913208]
ENSMUSG00000047518	1275.13	1.13397	0.0706885	16.0418	6.52E-58	1.92E-55	1848.16	1601.81	1807.51	819.642	820.453	753.194	Slfnl1	schlafen like 1 [Source:MGI Symbol;Acc:MGI:3045330]
ENSMUSG00000033502	384.789	1.13957	0.155186	7.34326	2.08E-13	9.80E-12	592.269	554.687	440.562	205.354	308.512	207.348	Cdc14a	CDC14 cell division cycle 14A [Source:MGI Symbol;Acc:MGI:2442676]
ENSMUSG00000064370	451.003	1.14319	0.11337	10.0837	6.52E-24	6.12E-22	585.133	611.4	666.878	282.288	311.206	249.111	mt-Cytb	mitochondrially encoded cytochrome b [Source:MGI Symbol;Acc:MGI:102501]
ENSMUSG00000002409	1318.71	1.14581	0.0720617	15.9004	6.30E-57	1.80E-54	1851.02	1922.73	1673.23	755.136	851.439	858.699	Dyrk1b	dual-specificity tyrosine phosphorylation regulated kinase 1b [Source:MGI Symbol;Acc:MGI:1330302]
ENSMUSG00000044084	1042.57	1.14787	0.0737028	15.5744	1.09E-54	2.90E-52	1332.96	1536.8	1440.88	666.958	643.295	634.5	Spem2	SPEM family member 2 [Source:MGI Symbol;Acc:MGI:1918293]
ENSMUSG00000064061	40.5797	1.14991	0.361762	3.17864	0.00147969	0.0140036	55.659	58.0969	54.3159	29.59	28.9651	16.8516	Dzip3	DAZ interacting protein 3, zinc finger [Source:MGI Symbol;Acc:MGI:1917433]
ENSMUSG00000025171	205.998	1.15077	0.178798	6.43614	1.23E-10	4.76E-09	255.46	320.916	276.106	129.604	154.256	99.6443	Ubtd1	ubiquitin domain containing 1 [Source:MGI Symbol;Acc:MGI:2385092]
ENSMUSG00000071322	53.2019	1.15384	0.385774	2.99097	0.00278096	0.023122	91.3378	77.4625	51.2983	21.8966	55.2358	21.9804	Tcp10a	t-complex protein 10a [Source:MGI Symbol;Acc:MGI:98541]
ENSMUSG00000046886	140.831	1.16765	0.194807	5.99391	2.05E-09	6.36E-08	211.219	186.74	187.088	91.1371	96.9994	71.8025	Zfp474	zinc finger protein 474 [Source:MGI Symbol;Acc:MGI:1914008]
ENSMUSG00000031085	285.902	1.16872	0.142961	8.17509	2.96E-16	1.81E-14	378.196	427.427	381.72	192.927	146.846	188.298	Acte1	actin, epsilon 1 [Source:MGI Symbol;Acc:MGI:2685344]
ENSMUSG00000026473	470.996	1.17334	0.103571	11.3288	9.45E-30	1.15E-27	682.179	650.132	626.141	308.327	282.241	276.953	Glul	glutamate-ammonia ligase [Source:MGI Symbol;Acc:MGI:95739]
ENSMUSG00000023495	46.3093	1.17796	0.359088	3.28042	0.00103652	0.0104819	51.3775	89.9118	51.2983	25.4474	36.3748	23.4457	Pcbp4	poly(rC) binding protein 4 [Source:MGI Symbol;Acc:MGI:1890471]
ENSMUSG00000025508	34.211	1.1821	0.435224	2.71607	0.00660613	0.0455211	21.4073	62.2466	58.8422	19.5294	24.9235	18.317	Rplp2	ribosomal protein lateral stalk subunit P2 [Source:MGI Symbol;Acc:MGI:1914436]
ENSMUSG00000037979	729.629	1.1842	0.0825282	14.3491	1.08E-46	2.35E-44	1043.25	998.713	998.809	465.154	443.233	428.617	Ccdc92	coiled-coil domain containing 92 [Source:MGI Symbol;Acc:MGI:106485]
ENSMUSG00000050697	64.6913	1.18736	0.322276	3.68428	0.00022935	0.0028754	108.464	102.361	58.8422	36.6916	53.215	28.5745	Prkaa1	protein kinase, AMP-activated, alpha 1 catalytic subunit [Source:MGI Symbol;Acc:MGI:2145955]
ENSMUSG00000035342	76.9006	1.19922	0.26763	4.48089	7.43E-06	0.000134676	91.3378	105.128	125.228	55.0373	37.0484	47.6241	Lzts2	leucine zipper, putative tumor suppressor 2 [Source:MGI Symbol;Acc:MGI:2385095]
ENSMUSG00000067438	35.5596	1.20693	0.40712	2.96456	0.00303118	0.024625	58.5133	31.8149	58.8422	26.631	22.9026	14.6536	Hmx1	H6 homeobox 1 [Source:MGI Symbol;Acc:MGI:107178]
ENSMUSG00000033124	547.404	1.21232	0.0962987	12.5892	2.42E-36	4.00E-34	782.08	792.607	719.685	344.427	315.922	329.705	Atg9a	autophagy related 9A [Source:MGI Symbol;Acc:MGI:2138446]
ENSMUSG00000035504	3672.92	1.2246	0.0395132	30.9922	6.87E-211	5.68E-207	5096.36	5018.46	5319.94	2224.57	2167.67	2210.49	Reep6	receptor accessory protein 6 [Source:MGI Symbol;Acc:MGI:1917585]
ENSMUSG00000038256	36.8289	1.22483	0.397085	3.08455	0.00203863	0.0181865	34.2517	51.1806	69.4036	19.5294	28.2915	18.317	Bcl9	B cell CLL/lymphoma 9 [Source:MGI Symbol;Acc:MGI:1924828]
ENSMUSG00000033688	33.4497	1.22737	0.440826	2.78425	0.00536516	0.0385794	38.5331	38.7312	63.3685	13.0196	31.6595	15.3863	Inhca	inhibitor of carbonic anhydrase [Source:MGI Symbol;Acc:MGI:1919025]
ENSMUSG00000038518	39.7815	1.22798	0.382178	3.2131	0.00131309	0.0126148	72.7848	55.3303	39.2281	24.8556	29.6387	16.8516	Jarid2	jumonji and AT-rich interaction domain containing 2 [Source:MGI Symbol;Acc:MGI:104813]
ENSMUSG00000040390	135.844	1.23943	0.235054	5.27296	1.34E-07	3.30E-06	132.725	235.154	205.193	100.606	75.444	65.9411	Map3k10	mitogen-activated protein kinase kinase kinase 10 [Source:MGI Symbol;Acc:MGI:1346879]
ENSMUSG00000002221	51.363	1.24308	0.416696	2.98318	0.00285274	0.0234989	38.5331	120.343	57.3334	17.754	30.9859	43.228	Paxip1	PAX interacting (with transcription-activation domain) protein 1 [Source:MGI Symbol;Acc:MGI:1890430]
ENSMUSG00000025903	71.7884	1.25256	0.275868	4.54043	5.61E-06	0.000104231	104.182	118.96	79.965	41.4259	36.3748	49.8222	Lypla1	lysophospholipase 1 [Source:MGI Symbol;Acc:MGI:1344588]
ENSMUSG00000037972	58.0144	1.25281	0.338683	3.69905	0.000216409	0.00272973	64.2219	87.1453	93.544	20.1212	47.1525	35.9013	Snn	stannin [Source:MGI Symbol;Acc:MGI:1276549]
ENSMUSG00000028643	33.8924	1.25541	0.442564	2.83667	0.00455864	0.0340318	71.3577	41.4978	30.1755	11.836	23.5762	24.9111	Svbp	small vasohibin binding protein [Source:MGI Symbol;Acc:MGI:1916466]
ENSMUSG00000043866	38.5686	1.26249	0.461458	2.73587	0.00622149	0.0434505	54.2318	58.0969	51.2983	29.59	32.3331	5.86143	Taf10	TATA-box binding protein associated factor 10 [Source:MGI Symbol;Acc:MGI:1346320]
ENSMUSG00000064351	1391.87	1.2775	0.0630207	20.2712	2.31E-91	1.91E-88	1966.62	2034.77	1911.62	824.376	846.724	767.115	mt-Co1	mitochondrially encoded cytochrome c oxidase I [Source:MGI Symbol;Acc:MGI:102504]
ENSMUSG00000037541	33.2415	1.27784	0.398645	3.20546	0.00134848	0.0128949	55.659	40.1145	45.2632	14.2032	22.229	21.9804	Shank2	SH3 and multiple ankyrin repeat domains 2 [Source:MGI Symbol;Acc:MGI:2671987]
ENSMUSG00000020747	154.546	1.27821	0.214054	5.97143	2.35E-09	7.22E-08	245.47	219.938	191.614	98.2387	110.472	61.545	Tmem94	transmembrane protein 94 [Source:MGI Symbol;Acc:MGI:1919197]
ENSMUSG00000040600	30.208	1.28443	0.43126	2.97831	0.00289844	0.0237569	39.9603	41.4978	46.772	10.6524	18.1874	24.1784	Eps8l3	EPS8-like 3 [Source:MGI Symbol;Acc:MGI:2139743]
ENSMUSG00000067629	92.455	1.28869	0.260503	4.94692	7.54E-07	1.62E-05	129.871	96.8281	167.474	63.3225	52.5413	44.6934	Syngap1	synaptic Ras GTPase activating protein 1 homolog (rat) [Source:MGI Symbol;Acc:MGI:3039785]
ENSMUSG00000021738	39.4746	1.29662	0.351173	3.69226	0.00022227	0.00279939	58.5133	52.5638	57.3334	23.672	24.2499	20.515	Atxn7	ataxin 7 [Source:MGI Symbol;Acc:MGI:2179277]
ENSMUSG00000022722	27.7226	1.29702	0.456935	2.83853	0.00453219	0.0339496	48.5232	45.6475	24.1404	21.3048	12.7985	13.9209	Arl6	ADP-ribosylation factor-like 6 [Source:MGI Symbol;Acc:MGI:1927136]
ENSMUSG00000033389	61.1354	1.30028	0.401929	3.23511	0.00121595	0.011819	164.123	48.4141	48.2808	32.549	39.7428	33.7032	Arhgap44	Rho GTPase activating protein 44 [Source:MGI Symbol;Acc:MGI:2144423]
ENSMUSG00000021366	105.461	1.30206	0.299593	4.34609	1.39E-05	0.000239037	218.354	159.075	72.4212	57.4045	55.9094	69.6045	Hivep1	human immunodeficiency virus type I enhancer binding protein 1 [Source:MGI Symbol;Acc:MGI:96100]
ENSMUSG00000031486	36.4713	1.30537	0.400504	3.25932	0.00111678	0.0111301	65.649	35.9647	54.3159	26.0392	14.1457	22.713	Adgra2	adhesion G protein-coupled receptor A2 [Source:MGI Symbol;Acc:MGI:1925810]
ENSMUSG00000022439	35.2225	1.33807	0.416109	3.21567	0.00130139	0.0125433	42.8146	70.5462	37.7194	13.6114	19.5346	27.1091	Parvg	parvin, gamma [Source:MGI Symbol;Acc:MGI:2158329]
ENSMUSG00000039449	35.0913	1.33819	0.411733	3.25014	0.00115347	0.0113655	57.0861	62.2466	31.6843	26.631	17.5138	15.3863	Prpf18	pre-mRNA processing factor 18 [Source:MGI Symbol;Acc:MGI:1914479]
ENSMUSG00000074088	29.762	1.34477	0.457558	2.93901	0.0032926	0.0263855	57.0861	48.4141	22.6316	17.1622	21.5554	11.7229	Snrnp40	small nuclear ribonucleoprotein 40 (U5) [Source:MGI Symbol;Acc:MGI:1913835]
ENSMUSG00000034818	26.0548	1.35481	0.47996	2.82276	0.00476115	0.0350907	32.8245	40.1145	39.2281	7.10159	20.2082	16.8516	Celf5	CUGBP, Elav-like family member 5 [Source:MGI Symbol;Acc:MGI:2442333]
ENSMUSG00000022974	38.1677	1.359	0.469967	2.89169	0.00383171	0.0296142	89.9106	55.3303	19.6141	26.0392	24.9235	13.1882	Paxbp1	PAX3 and PAX7 binding protein 1 [Source:MGI Symbol;Acc:MGI:1914617]
ENSMUSG00000022445	31.3787	1.3669	0.41841	3.2669	0.00108731	0.0108921	34.2517	47.0308	54.3159	17.1622	12.7985	22.713	Cyp2d26	cytochrome P450, family 2, subfamily d, polypeptide 26 [Source:MGI Symbol;Acc:MGI:1923529]
ENSMUSG00000039046	22.7273	1.36968	0.483057	2.83543	0.00457635	0.0340323	38.5331	23.5154	36.2106	10.6524	12.7985	14.6536	Usp6nl	USP6 N-terminal like [Source:MGI Symbol;Acc:MGI:2138893]
ENSMUSG00000020864	60.3833	1.38141	0.352006	3.92441	8.69E-05	0.00124494	125.589	44.2643	92.0352	36.0998	26.9443	37.3666	Ankrd40	ankyrin repeat domain 40 [Source:MGI Symbol;Acc:MGI:1918702]
ENSMUSG00000024565	68.3949	1.38192	0.323167	4.27619	1.90E-05	0.000316686	125.589	113.427	57.3334	40.2423	27.6179	46.1588	Sall3	spalt like transcription factor 3 [Source:MGI Symbol;Acc:MGI:109295]
ENSMUSG00000037279	25.0183	1.38197	0.462064	2.99087	0.00278181	0.023122	41.3874	42.881	24.1404	13.0196	15.493	13.1882	Ovol2	ovo like zinc finger 2 [Source:MGI Symbol;Acc:MGI:1338039]
ENSMUSG00000007892	24.7045	1.38595	0.468603	2.95762	0.00310024	0.0250628	37.106	24.8987	45.2632	14.795	10.7777	15.3863	Rplp1	ribosomal protein lateral stalk subunit P1 [Source:MGI Symbol;Acc:MGI:1927099]
ENSMUSG00000003032	65.3112	1.38822	0.289265	4.79914	1.59E-06	3.23E-05	85.6292	98.2114	99.5791	28.9982	46.4789	32.9705	Klf4	Kruppel-like transcription factor 4 (gut) [Source:MGI Symbol;Acc:MGI:1342287]
ENSMUSG00000036241	67.5353	1.39063	0.287869	4.83077	1.36E-06	2.80E-05	104.182	80.229	108.632	28.4064	39.0692	44.6934	Ube2r2	ubiquitin-conjugating enzyme E2R 2 [Source:MGI Symbol;Acc:MGI:1914865]
ENSMUSG00000022707	44.8127	1.40425	0.353183	3.976	7.01E-05	0.001034	54.2318	80.229	60.351	17.754	26.2707	30.0398	Gbe1	1,4-alpha-glucan branching enzyme 1 [Source:MGI Symbol;Acc:MGI:1921435]
ENSMUSG00000026565	30.941	1.41952	0.468568	3.02948	0.00244972	0.0208871	74.212	27.6652	33.193	13.0196	22.9026	14.6536	Pou2f1	POU domain, class 2, transcription factor 1 [Source:MGI Symbol;Acc:MGI:101898]
ENSMUSG00000037386	113.249	1.43158	0.221506	6.46295	1.03E-10	4.02E-09	168.404	131.41	196.141	61.5471	62.6455	59.347	Rims2	regulating synaptic membrane exocytosis 2 [Source:MGI Symbol;Acc:MGI:2152972]
ENSMUSG00000028541	34.0498	1.43941	0.381794	3.77012	0.000163166	0.00212564	54.2318	51.1806	43.7545	17.1622	18.1874	19.7823	B4galt2	UDP-Gal:betaGlcNAc beta 1,4- galactosyltransferase, polypeptide 2 [Source:MGI Symbol;Acc:MGI:1858493]
ENSMUSG00000015605	26.9072	1.44229	0.538743	2.67714	0.00742532	0.0498359	68.5034	19.3656	30.1755	18.3458	6.73607	18.317	Srf	serum response factor [Source:MGI Symbol;Acc:MGI:106658]
ENSMUSG00000037432	53.1249	1.45376	0.358734	4.05248	5.07E-05	0.000771082	52.8047	82.9955	98.0703	33.7326	35.0276	16.1189	Fer1l5	fer-1 like family member 5 [Source:MGI Symbol;Acc:MGI:3616091]
ENSMUSG00000026925	52.75	1.4697	0.379344	3.87431	0.000106927	0.00148476	118.454	59.4801	54.3159	17.1622	37.0484	30.0398	Inpp5e	inositol polyphosphate-5-phosphatase E [Source:MGI Symbol;Acc:MGI:1927753]
ENSMUSG00000006356	82.0535	1.50249	0.272222	5.51934	3.40E-08	8.92E-07	118.454	128.643	116.176	31.3654	39.0692	58.6143	Crip2	cysteine rich protein 2 [Source:MGI Symbol;Acc:MGI:1915587]
ENSMUSG00000037989	41.6476	1.54808	0.422039	3.66809	0.000244369	0.00303149	31.3974	53.9471	101.088	26.0392	16.1666	21.2477	Wnk2	WNK lysine deficient protein kinase 2 [Source:MGI Symbol;Acc:MGI:1922857]
ENSMUSG00000087376	177.963	1.57863	0.188257	8.38551	5.05E-17	3.21E-15	241.189	266.969	292.702	111.85	78.1384	76.9313	Gm15517	predicted gene 15517 [Source:MGI Symbol;Acc:MGI:3782964]
ENSMUSG00000064368	132.669	1.60606	0.214611	7.4836	7.23E-14	3.58E-12	225.49	159.075	214.246	56.2209	63.3191	77.6639	mt-Nd6	mitochondrially encoded NADH dehydrogenase 6 [Source:MGI Symbol;Acc:MGI:102495]
ENSMUSG00000031970	22.5251	1.61343	0.558257	2.89012	0.00385092	0.0296794	29.9702	53.9471	18.1053	17.1622	10.1041	5.86143	Dbndd1	dysbindin domain containing 1 [Source:MGI Symbol;Acc:MGI:1919435]
ENSMUSG00000064363	110.928	1.63094	0.303763	5.3691	7.91E-08	2.01E-06	125.589	258.669	119.193	70.4241	57.2566	34.4359	mt-Nd4	mitochondrially encoded NADH dehydrogenase 4 [Source:MGI Symbol;Acc:MGI:102498]
ENSMUSG00000062944	21.8249	1.64861	0.613945	2.68528	0.0072469	0.0489166	9.99007	27.6652	61.8597	14.795	10.7777	5.86143	9130023H24Rik	RIKEN cDNA 9130023H24 gene [Source:MGI Symbol;Acc:MGI:2442738]
ENSMUSG00000040596	19.3135	1.64954	0.552708	2.98447	0.00284069	0.0234698	34.2517	24.8987	28.6667	5.91799	14.8194	7.32679	Pogk	pogo transposable element with KRAB domain [Source:MGI Symbol;Acc:MGI:1918842]
ENSMUSG00000048516	25.9926	1.68831	0.555303	3.04034	0.00236309	0.0202529	11.4172	59.4801	48.2808	15.9786	13.4721	7.32679	Adam26a	ADAM metallopeptidase domain 26A [Source:MGI Symbol;Acc:MGI:105985]
ENSMUSG00000027797	24.0552	1.71101	0.492712	3.47264	0.000515358	0.00580094	48.5232	31.8149	30.1755	12.4278	6.73607	14.6536	Dclk1	doublecortin-like kinase 1 [Source:MGI Symbol;Acc:MGI:1330861]
ENSMUSG00000040857	21.211	1.72297	0.617415	2.79061	0.00526084	0.0380272	39.9603	42.881	15.0877	18.9376	6.73607	3.66339	Erf	Ets2 repressor factor [Source:MGI Symbol;Acc:MGI:109637]
ENSMUSG00000018559	27.5482	1.7503	0.526654	3.32343	0.000889166	0.00922901	67.0762	35.9647	24.1404	5.32619	18.861	13.9209	Ctdnep1	CTD nuclear envelope phosphatase 1 [Source:MGI Symbol;Acc:MGI:1914431]
ENSMUSG00000103310	19.3669	1.78826	0.652231	2.74176	0.00611101	0.042825	25.6888	23.5154	40.7369	1.1836	14.8194	10.2575	Pcdha12	protocadherin alpha 12 [Source:MGI Symbol;Acc:MGI:1298370]
ENSMUSG00000018733	15.0759	1.78987	0.662143	2.70316	0.00686846	0.0468985	35.6788	20.7489	13.579	2.959	9.4305	8.05947	Pex12	peroxisomal biogenesis factor 12 [Source:MGI Symbol;Acc:MGI:2144177]
ENSMUSG00000020393	71.3266	1.805	0.298095	6.05511	1.40E-09	4.51E-08	129.871	109.277	93.544	26.631	44.4581	24.1784	Kremen1	kringle containing transmembrane protein 1 [Source:MGI Symbol;Acc:MGI:1933988]
ENSMUSG00000069833	41.6586	1.82407	0.437401	4.17025	3.04E-05	0.000487172	55.659	91.2951	48.2808	31.3654	9.4305	13.9209	Ahnak	AHNAK nucleoprotein [Source:MGI Symbol;Acc:MGI:1316648]
ENSMUSG00000042320	14.3115	1.86444	0.620067	3.00684	0.00263983	0.0220975	27.1159	22.1321	18.1053	5.91799	6.73607	5.86143	Prox2	prospero homeobox 2 [Source:MGI Symbol;Acc:MGI:1920672]
ENSMUSG00000092009	21.6932	1.86836	0.576268	3.24217	0.00118622	0.0115878	29.9702	16.5991	55.8246	11.2442	12.1249	4.39607	Myh15	myosin, heavy chain 15 [Source:MGI Symbol;Acc:MGI:3643515]
ENSMUSG00000121910	42.0185	1.87203	0.353941	5.2891	1.23E-07	3.05E-06	77.0663	63.6299	57.3334	17.754	20.2082	16.1189		novel protein
ENSMUSG00000045639	19.0455	1.8747	0.615657	3.04504	0.00232652	0.0200018	49.9504	9.68281	30.1755	8.87699	6.06246	9.52482	Zfp629	zinc finger protein 629 [Source:MGI Symbol;Acc:MGI:2444524]
ENSMUSG00000078794	21.2856	1.88069	0.630241	2.98408	0.00284435	0.0234766	45.6689	44.2643	10.5614	9.46879	14.8194	2.93071	Dact3	dishevelled-binding antagonist of beta-catenin 3 [Source:MGI Symbol;Acc:MGI:3654828]
ENSMUSG00000026095	48.9784	1.88527	0.340414	5.53816	3.06E-08	8.12E-07	95.6193	70.5462	64.8773	18.9376	17.5138	26.3764	Asnsd1	asparagine synthetase domain containing 1 [Source:MGI Symbol;Acc:MGI:1917646]
ENSMUSG00000074406	25.3176	1.89458	0.491595	3.85394	0.000116232	0.00158992	48.5232	47.0308	24.1404	13.0196	6.73607	12.4555	Zfp628	zinc finger protein 628 [Source:MGI Symbol;Acc:MGI:2665174]
ENSMUSG00000020100	14.5961	1.98701	0.66556	2.98547	0.00283144	0.0234231	25.6888	12.4493	31.6843	2.959	6.73607	8.05947	Slc29a3	solute carrier family 29 (nucleoside transporters), member 3 [Source:MGI Symbol;Acc:MGI:1918529]
ENSMUSG00000040824	20.5829	2.05044	0.632444	3.24209	0.00118655	0.0115878	21.4073	51.1806	27.1579	14.2032	8.08328	1.46536	Snrpd2	small nuclear ribonucleoprotein D2 [Source:MGI Symbol;Acc:MGI:98345]
ENSMUSG00000020577	14.9703	2.12295	0.703362	3.01829	0.00254203	0.0215192	7.13577	22.1321	43.7545	4.14259	6.06246	6.59411	Tspan13	tetraspanin 13 [Source:MGI Symbol;Acc:MGI:1913359]
ENSMUSG00000027405	14.1561	2.13411	0.678849	3.14371	0.00166819	0.0153995	14.2715	26.2819	28.6667	7.10159	2.02082	6.59411	Nop56	NOP56 ribonucleoprotein [Source:MGI Symbol;Acc:MGI:1914384]
ENSMUSG00000028487	13.1974	2.13855	0.793051	2.69661	0.00700499	0.0477125	19.9801	5.53303	39.2281	8.87699	3.36804	2.19804	Bnc2	basonuclin zinc finger protein 2 [Source:MGI Symbol;Acc:MGI:2443805]
ENSMUSG00000074500	24.5639	2.1619	0.475146	4.54996	5.37E-06	0.000100174	47.0961	38.7312	34.7018	10.6524	7.40968	8.79214	Zfp558	zinc finger protein 558 [Source:MGI Symbol;Acc:MGI:1921681]
ENSMUSG00000036023	13.3846	2.17234	0.810576	2.68	0.00736221	0.049533	28.5431	24.8987	12.0702	0	6.73607	8.05947	Parp2	poly (ADP-ribose) polymerase family, member 2 [Source:MGI Symbol;Acc:MGI:1341112]
ENSMUSG00000032615	12.3546	2.21764	0.705217	3.14462	0.00166301	0.0153861	19.9801	12.4493	28.6667	5.32619	4.04164	3.66339	Nt5m	5',3'-nucleotidase, mitochondrial [Source:MGI Symbol;Acc:MGI:1917127]
ENSMUSG00000053825	15.593	2.2441	0.65024	3.45118	0.000558142	0.00623158	22.8345	13.8326	40.7369	7.10159	5.38886	3.66339	Ppfia2	protein tyrosine phosphatase, receptor type, f polypeptide (PTPRF), interacting protein (liprin), alpha 2 [Source:MGI Symbol;Acc:MGI:2443834]
ENSMUSG00000029428	25.6221	2.30786	0.561733	4.10847	3.98E-05	0.000627997	55.659	55.3303	16.5965	4.14259	8.08328	13.9209	Stx2	syntaxin 2 [Source:MGI Symbol;Acc:MGI:108059]
ENSMUSG00000052949	16.6672	2.31799	0.693813	3.34094	0.000834948	0.00879903	34.2517	42.881	6.0351	4.73439	4.04164	8.05947	Rnf157	ring finger protein 157 [Source:MGI Symbol;Acc:MGI:2442484]
ENSMUSG00000021709	18.4633	2.32267	0.661743	3.50992	0.000448234	0.00516501	41.3874	37.348	13.579	4.14259	12.1249	2.19804	Erbin	Erbb2 interacting protein [Source:MGI Symbol;Acc:MGI:1890169]
ENSMUSG00000016346	11.2982	2.3305	0.813462	2.86492	0.00417115	0.0317915	25.6888	26.2819	4.52632	4.14259	2.02082	5.12875	Kcnq2	potassium voltage-gated channel, subfamily Q, member 2 [Source:MGI Symbol;Acc:MGI:1309503]
ENSMUSG00000029053	9.58311	2.66125	0.854712	3.11362	0.00184808	0.0167974	14.2715	8.29955	27.1579	3.5508	2.02082	2.19804	Prkcz	protein kinase C, zeta [Source:MGI Symbol;Acc:MGI:97602]
ENSMUSG00000007617	11.0041	2.69354	0.840923	3.20308	0.00135966	0.0129868	25.6888	16.5991	15.0877	6.50979	0.673607	1.46536	Homer1	homer scaffolding protein 1 [Source:MGI Symbol;Acc:MGI:1347345]
ENSMUSG00000026851	17.3224	2.81713	0.628301	4.48373	7.34E-06	0.000133779	32.8245	26.2819	31.6843	1.7754	4.04164	7.32679	BC005624	cDNA sequence BC005624 [Source:MGI Symbol;Acc:MGI:2385132]
ENSMUSG00000029524	10.6665	3.25511	0.942794	3.45262	0.000555176	0.00620685	25.6888	11.0661	21.1228	0	5.38886	0.732679	Sirt4	sirtuin 4 [Source:MGI Symbol;Acc:MGI:1922637]

## Sheet: |FC|>1, P<0.05
ensembl_gene_id	baseMean	log2FoldChange	lfcSE	stat	pvalue	padj	HE1	HE2	HE3	KE1	KE2	KE3	external_gene_name	description
ENSMUSG00000031825	12.0573	-6.50718	1.35515	-4.80183	1.57E-06	3.19E-05	0	0	0	13.0196	33.6804	25.6438	Crispld2	cysteine-rich secretory protein LCCL domain containing 2 [Source:MGI Symbol;Acc:MGI:1926142]
ENSMUSG00000031170	11.349	-5.42576	1.39183	-3.89831	9.69E-05	0.00136573	0	1.38326	0	8.28519	18.861	39.5647	Slc38a5	solute carrier family 38, member 5 [Source:MGI Symbol;Acc:MGI:2148066]
ENSMUSG00000019124	10.0565	-4.33139	1.25045	-3.46387	0.000532457	0.005969	1.42715	1.38326	0	23.0802	24.9235	9.52482	Scrn1	secernin 1 [Source:MGI Symbol;Acc:MGI:1917188]
ENSMUSG00000029661	40.9756	-4.1676	0.588258	-7.08465	1.39E-12	6.09E-11	0	5.53303	7.54387	95.2797	61.2982	76.1986	Col1a2	collagen, type I, alpha 2 [Source:MGI Symbol;Acc:MGI:88468]
ENSMUSG00000002603	13.4498	-4.15299	1.02215	-4.06299	4.84E-05	0.000739894	2.85431	1.38326	0	23.672	33.0067	19.7823	Tgfb1	transforming growth factor, beta 1 [Source:MGI Symbol;Acc:MGI:98725]
ENSMUSG00000019997	31.5261	-3.94585	0.632929	-6.23427	4.54E-10	1.60E-08	8.56292	0	3.01755	56.8127	59.951	60.8123	Ccn2	cellular communication network factor 2 [Source:MGI Symbol;Acc:MGI:95537]
ENSMUSG00000001119	14.3856	-3.48278	0.895097	-3.89096	9.98E-05	0.00140015	0	6.91629	0	27.2228	31.6595	20.515	Col6a1	collagen, type VI, alpha 1 [Source:MGI Symbol;Acc:MGI:88459]
ENSMUSG00000028780	12.6074	-3.2549	0.949399	-3.42838	0.000607192	0.00666218	7.13577	0	0	24.2638	13.4721	30.7725	Sema3c	sema domain, immunoglobulin domain (Ig), short basic domain, secreted, (semaphorin) 3C [Source:MGI Symbol;Acc:MGI:107557]
ENSMUSG00000018217	14.1829	-3.12555	0.843249	-3.70656	0.000210097	0.00265822	2.85431	0	6.0351	20.713	18.861	36.6339	Pmp22	peripheral myelin protein 22 [Source:MGI Symbol;Acc:MGI:97631]
ENSMUSG00000027204	13.6624	-3.10378	0.842672	-3.68327	0.000230266	0.00288251	2.85431	5.53303	0	22.4884	18.861	32.2379	Fbn1	fibrillin 1 [Source:MGI Symbol;Acc:MGI:95489]
ENSMUSG00000034391	13.3197	-3.04167	0.87767	-3.46562	0.000529015	0.00593848	7.13577	0	1.50877	16.5704	19.5346	35.1686	Fbxo15	F-box protein 15 [Source:MGI Symbol;Acc:MGI:1354755]
ENSMUSG00000043207	11.0527	-3.00314	0.971114	-3.09247	0.00198497	0.0178066	0	0	7.54387	17.754	16.8402	24.1784	Zmpste24	zinc metallopeptidase, STE24 [Source:MGI Symbol;Acc:MGI:1890508]
ENSMUSG00000021361	10.2156	-2.9424	1.00625	-2.92412	0.00345426	0.0273363	0	6.91629	0	18.3458	23.5762	12.4555	Tmem14c	transmembrane protein 14C [Source:MGI Symbol;Acc:MGI:1913404]
ENSMUSG00000029231	19.8222	-2.85755	0.664218	-4.30212	1.69E-05	0.000285823	7.13577	2.76652	4.52632	31.9572	24.9235	47.6241	Pdgfra	platelet derived growth factor receptor, alpha polypeptide [Source:MGI Symbol;Acc:MGI:97530]
ENSMUSG00000029309	27.2624	-2.85164	0.577668	-4.93648	7.95E-07	1.70E-05	7.13577	12.4493	0	40.8341	51.8677	51.2875	Sparcl1	SPARC-like 1 [Source:MGI Symbol;Acc:MGI:108110]
ENSMUSG00000017754	20.5319	-2.78961	0.70391	-3.96302	7.40E-05	0.00108032	2.85431	12.4493	0	26.0392	52.5413	29.3071	Pltp	phospholipid transfer protein [Source:MGI Symbol;Acc:MGI:103151]
ENSMUSG00000030423	12.6861	-2.7337	0.958238	-2.85284	0.00433306	0.0328477	4.28146	5.53303	0	3.5508	36.3748	26.3764	Pop4	processing of precursor 4, ribonuclease P/MRP family, (S. cerevisiae) [Source:MGI Symbol;Acc:MGI:1913411]
ENSMUSG00000037035	23.4518	-2.72616	0.623262	-4.37402	1.22E-05	0.000212614	2.85431	13.8326	1.50877	31.9572	45.1317	45.4261	Inhbb	inhibin beta-B [Source:MGI Symbol;Acc:MGI:96571]
ENSMUSG00000026478	12.7245	-2.70974	0.805862	-3.36253	0.000772305	0.00819099	4.28146	1.38326	4.52632	23.672	16.8402	25.6438	Lamc1	laminin, gamma 1 [Source:MGI Symbol;Acc:MGI:99914]
ENSMUSG00000025816	30.5854	-2.68731	0.53989	-4.97751	6.44E-07	1.42E-05	12.8444	0	12.0702	57.4045	49.1733	52.0202	Sec61a2	SEC61 translocon subunit alpha 2 [Source:MGI Symbol;Acc:MGI:1931071]
ENSMUSG00000019278	15.704	-2.64081	0.741603	-3.56095	0.000369522	0.00434626	0	5.53303	7.54387	20.1212	30.9859	30.0398	Dpep1	dipeptidase 1 [Source:MGI Symbol;Acc:MGI:94917]
ENSMUSG00000029999	15.3027	-2.60316	0.742685	-3.50507	0.000456495	0.00523828	8.56292	1.38326	3.01755	18.9376	26.9443	32.9705	Tgfa	transforming growth factor alpha [Source:MGI Symbol;Acc:MGI:98724]
ENSMUSG00000005202	11.5245	-2.53823	0.857357	-2.96054	0.00307105	0.0248755	1.42715	2.76652	6.0351	12.4278	29.6387	16.8516	Shbg	sex hormone binding globulin [Source:MGI Symbol;Acc:MGI:98295]
ENSMUSG00000046179	12.8309	-2.50177	0.776069	-3.22365	0.00126568	0.0122591	1.42715	4.14978	6.0351	21.8966	22.229	21.2477	E2f8	E2F transcription factor 8 [Source:MGI Symbol;Acc:MGI:1922038]
ENSMUSG00000001506	23.4843	-2.48726	0.594859	-4.18125	2.90E-05	0.000465093	2.85431	15.2158	3.01755	37.8752	43.1109	38.832	Col1a1	collagen, type I, alpha 1 [Source:MGI Symbol;Acc:MGI:88467]
ENSMUSG00000035441	14.0492	-2.46442	0.772437	-3.19045	0.00142053	0.0135057	4.28146	4.14978	4.52632	34.9162	10.7777	25.6438	Myo1d	myosin ID [Source:MGI Symbol;Acc:MGI:107728]
ENSMUSG00000039031	14.0803	-2.45669	0.78133	-3.14424	0.00166521	0.0153893	2.85431	2.76652	7.54387	36.6916	22.9026	11.7229	Arhgap18	Rho GTPase activating protein 18 [Source:MGI Symbol;Acc:MGI:1921160]
ENSMUSG00000038633	15.3774	-2.43916	0.743654	-3.27996	0.00103821	0.0104862	0	8.29955	6.0351	26.0392	18.1874	33.7032	Degs1	delta 4-desaturase, sphingolipid 1 [Source:MGI Symbol;Acc:MGI:1097711]
ENSMUSG00000041329	15.4288	-2.42142	0.753068	-3.2154	0.00130261	0.0125433	0	4.14978	10.5614	20.1212	35.0276	22.713	Atp1b2	ATPase, Na+/K+ transporting, beta 2 polypeptide [Source:MGI Symbol;Acc:MGI:88109]
ENSMUSG00000032323	10.6047	-2.41595	0.90179	-2.67906	0.00738292	0.049632	0	5.53303	4.52632	22.4884	21.5554	9.52482	Cyp11a1	cytochrome P450, family 11, subfamily a, polypeptide 1 [Source:MGI Symbol;Acc:MGI:88582]
ENSMUSG00000025465	15.1179	-2.38501	0.730037	-3.26698	0.00108702	0.0108921	4.28146	1.38326	9.05265	17.1622	30.9859	27.8418	Echs1	enoyl Coenzyme A hydratase, short chain, 1, mitochondrial [Source:MGI Symbol;Acc:MGI:2136460]
ENSMUSG00000023224	114.734	-2.36104	0.27539	-8.57344	1.00E-17	6.75E-16	18.553	47.0308	46.772	220.741	192.652	162.655	Serping1	serine (or cysteine) peptidase inhibitor, clade G, member 1 [Source:MGI Symbol;Acc:MGI:894696]
ENSMUSG00000005533	13.0082	-2.3601	0.834024	-2.82977	0.00465819	0.0345165	0	11.0661	1.50877	26.0392	18.1874	21.2477	Igf1r	insulin-like growth factor I receptor [Source:MGI Symbol;Acc:MGI:96433]
ENSMUSG00000046785	20.4287	-2.34461	0.589266	-3.97886	6.92E-05	0.00102346	5.70861	6.91629	7.54387	33.1408	28.9651	40.2973	Epm2aip1	EPM2A interacting protein 1 [Source:MGI Symbol;Acc:MGI:1925031]
ENSMUSG00000040234	18.4613	-2.26895	0.697014	-3.25524	0.00113295	0.0112494	2.85431	1.38326	15.0877	36.6916	35.7012	19.0496	Tm7sf3	transmembrane 7 superfamily member 3 [Source:MGI Symbol;Acc:MGI:1914873]
ENSMUSG00000036617	21.12	-2.26418	0.654288	-3.46052	0.000539126	0.00603558	9.99007	0	12.0702	47.9357	21.5554	35.1686	Etl4	enhancer trap locus 4 [Source:MGI Symbol;Acc:MGI:95454]
ENSMUSG00000001942	16.5861	-2.24778	0.686732	-3.27315	0.00106355	0.0107029	2.85431	5.53303	9.05265	40.2423	24.2499	17.5843	Siae	sialic acid acetylesterase [Source:MGI Symbol;Acc:MGI:104803]
ENSMUSG00000020108	13.7023	-2.23939	0.830271	-2.69717	0.00699307	0.0476706	0	8.29955	6.0351	22.4884	8.75689	36.6339	Ddit4	DNA-damage-inducible transcript 4 [Source:MGI Symbol;Acc:MGI:1921997]
ENSMUSG00000017760	18.0379	-2.22255	0.732387	-3.03466	0.00240805	0.0205956	0	2.76652	16.5965	27.8146	39.0692	21.9804	Ctsa	cathepsin A [Source:MGI Symbol;Acc:MGI:97748]
ENSMUSG00000026840	44.6033	-2.21257	0.417155	-5.30395	1.13E-07	2.83E-06	4.28146	22.1321	21.1228	71.6077	78.1384	70.3372	Lamc3	laminin gamma 3 [Source:MGI Symbol;Acc:MGI:1344394]
ENSMUSG00000026879	98.5677	-2.20564	0.545088	-4.0464	5.20E-05	0.000788465	27.1159	15.2158	63.3685	185.233	149.541	150.932	Gsn	gelsolin [Source:MGI Symbol;Acc:MGI:95851]
ENSMUSG00000031785	40.1526	-2.2011	0.42757	-5.14793	2.63E-07	6.10E-06	14.2715	15.2158	13.579	75.7503	78.1384	43.9607	Adgrg1	adhesion G protein-coupled receptor G1 [Source:MGI Symbol;Acc:MGI:1340051]
ENSMUSG00000051503	15.6052	-2.17419	0.724157	-3.00238	0.00267879	0.0223557	5.70861	11.0661	0	27.2228	18.861	30.7725	Ccdc121rt3	coiled-coil domain containing 121, retrogene 3 [Source:MGI Symbol;Acc:MGI:3648511]
ENSMUSG00000046603	16.6014	-2.15315	0.795866	-2.70542	0.00682181	0.0466958	1.42715	16.5991	0	18.9376	20.8818	41.7627	Tcaim	T cell activation inhibitor, mitochondrial [Source:MGI Symbol;Acc:MGI:1196217]
ENSMUSG00000030619	13.9367	-2.11751	0.724139	-2.92418	0.00345361	0.0273363	7.13577	6.91629	1.50877	24.2638	26.9443	16.8516	Eed	embryonic ectoderm development [Source:MGI Symbol;Acc:MGI:95286]
ENSMUSG00000038776	16.2328	-2.10885	0.745479	-2.82885	0.00467151	0.0345842	4.28146	13.8326	0	21.8966	39.0692	18.317	Ephx1	epoxide hydrolase 1, microsomal [Source:MGI Symbol;Acc:MGI:95405]
ENSMUSG00000043753	17.3936	-2.07946	0.65294	-3.18477	0.00144869	0.0137468	5.70861	11.0661	3.01755	24.8556	20.8818	38.832	Dmrta1	doublesex and mab-3 related transcription factor like family A1 [Source:MGI Symbol;Acc:MGI:2653627]
ENSMUSG00000029106	31.5399	-2.07527	0.472525	-4.39187	1.12E-05	0.000199243	9.99007	6.91629	19.6141	46.1603	46.4789	60.0797	Add1	adducin 1 [Source:MGI Symbol;Acc:MGI:87918]
ENSMUSG00000033285	13.3647	-2.05069	0.751847	-2.72754	0.00638094	0.044302	2.85431	11.0661	1.50877	21.8966	20.8818	21.9804	Wdr3	WD repeat domain 3 [Source:MGI Symbol;Acc:MGI:2443143]
ENSMUSG00000041313	20.765	-2.03794	0.593714	-3.43253	0.000597974	0.00658728	12.8444	6.91629	4.52632	27.8146	25.5971	46.8914	Slc7a1	solute carrier family 7 (cationic amino acid transporter, y+ system), member 1 [Source:MGI Symbol;Acc:MGI:88117]
ENSMUSG00000043384	21.0499	-2.02217	0.658492	-3.07091	0.00213408	0.0187174	1.42715	4.14978	19.6141	21.3048	42.4372	37.3666	Gprasp1	G protein-coupled receptor associated sorting protein 1 [Source:MGI Symbol;Acc:MGI:1917418]
ENSMUSG00000002900	35.8739	-2.01876	0.495027	-4.07808	4.54E-05	0.000697574	14.2715	24.8987	3.01755	37.8752	62.6455	72.5352	Lamb1	laminin B1 [Source:MGI Symbol;Acc:MGI:96743]
ENSMUSG00000079019	62.8392	-2.01365	0.333531	-6.03737	1.57E-09	4.98E-08	27.1159	22.1321	25.6492	89.9535	128.659	83.5254	Insl3	insulin-like 3 [Source:MGI Symbol;Acc:MGI:108427]
ENSMUSG00000028641	16.6561	-2.0084	0.684342	-2.9348	0.00333768	0.0266826	2.85431	13.8326	3.01755	24.8556	20.2082	35.1686	P3h1	prolyl 3-hydroxylase 1 [Source:MGI Symbol;Acc:MGI:1888921]
ENSMUSG00000037376	18.2206	-2.00599	0.652818	-3.07282	0.00212046	0.0186739	1.42715	6.91629	13.579	21.8966	38.3956	27.1091	Trmt6	tRNA methyltransferase 6 [Source:MGI Symbol;Acc:MGI:1914176]
ENSMUSG00000031502	34.7434	-1.98866	0.453035	-4.38965	1.14E-05	0.00020086	12.8444	8.29955	21.1228	70.4241	52.5413	43.228	Col4a1	collagen, type IV, alpha 1 [Source:MGI Symbol;Acc:MGI:88454]
ENSMUSG00000026043	21.7445	-1.97535	0.640678	-3.08322	0.0020477	0.0182111	4.28146	1.38326	21.1228	40.8341	26.9443	35.9013	Col3a1	collagen, type III, alpha 1 [Source:MGI Symbol;Acc:MGI:88453]
ENSMUSG00000022479	12.8893	-1.97486	0.735334	-2.68566	0.00723863	0.0489166	4.28146	8.29955	3.01755	24.2638	15.493	21.9804	Vdr	vitamin D (1,25-dihydroxyvitamin D3) receptor [Source:MGI Symbol;Acc:MGI:103076]
ENSMUSG00000019820	18.7907	-1.9742	0.599987	-3.2904	0.00100047	0.0102097	4.28146	12.4493	6.0351	30.1818	28.2915	31.5052	Utrn	utrophin [Source:MGI Symbol;Acc:MGI:104631]
ENSMUSG00000019087	22.0408	-1.95349	0.67063	-2.91292	0.00358068	0.0280679	14.2715	8.29955	4.52632	34.3244	61.2982	9.52482	Atp6ap1	ATPase, H+ transporting, lysosomal accessory protein 1 [Source:MGI Symbol;Acc:MGI:109629]
ENSMUSG00000021054	25.2972	-1.9495	0.562203	-3.46761	0.000525116	0.00590274	8.56292	19.3656	3.01755	31.9572	55.9094	32.9705	Sgpp1	sphingosine-1-phosphate phosphatase 1 [Source:MGI Symbol;Acc:MGI:2135760]
ENSMUSG00000072941	42.3548	-1.94537	0.424444	-4.58333	4.58E-06	8.69E-05	12.8444	8.29955	31.6843	68.6487	74.7704	57.8816	Sod3	superoxide dismutase 3, extracellular [Source:MGI Symbol;Acc:MGI:103181]
ENSMUSG00000062380	59.0883	-1.93081	0.359678	-5.36816	7.95E-08	2.01E-06	34.2517	11.0661	28.6667	104.157	102.388	74.0006	Tubb3	tubulin, beta 3 class III [Source:MGI Symbol;Acc:MGI:107813]
ENSMUSG00000089774	20.8464	-1.92491	0.644506	-2.98665	0.00282054	0.0233734	17.1258	0	9.05265	37.2834	24.2499	37.3666	Slc5a3	solute carrier family 5 (inositol transporters), member 3 [Source:MGI Symbol;Acc:MGI:1858226]
ENSMUSG00000019899	62.1411	-1.92283	0.323282	-5.94785	2.72E-09	8.25E-08	31.3974	20.7489	25.6492	85.2191	96.9994	112.833	Lama2	laminin, alpha 2 [Source:MGI Symbol;Acc:MGI:99912]
ENSMUSG00000027931	32.0106	-1.89582	0.468007	-4.05083	5.10E-05	0.00077511	7.13577	9.68281	24.1404	49.1193	48.4997	53.4855	Npr1	natriuretic peptide receptor 1 [Source:MGI Symbol;Acc:MGI:97371]
ENSMUSG00000037706	38.3015	-1.89075	0.483801	-3.90812	9.30E-05	0.0013182	4.28146	23.5154	21.1228	89.9535	49.1733	41.7627	Cd81	CD81 antigen [Source:MGI Symbol;Acc:MGI:1096398]
ENSMUSG00000052911	65.3253	-1.88222	0.311861	-6.03543	1.59E-09	5.02E-08	27.1159	23.5154	33.193	96.4633	117.881	93.7829	Lamb2	laminin, beta 2 [Source:MGI Symbol;Acc:MGI:99916]
ENSMUSG00000045587	25.6886	-1.87469	0.565151	-3.31714	0.000909431	0.00941569	2.85431	17.9824	12.0702	30.7736	29.6387	60.8123	Lypd10	Ly6/PLAUR domain containing 10 [Source:MGI Symbol;Acc:MGI:2681843]
ENSMUSG00000008958	18.8939	-1.87352	0.583873	-3.20879	0.00133297	0.0127909	9.99007	9.68281	4.52632	30.7736	27.6179	30.7725	Vps72	vacuolar protein sorting 72 [Source:MGI Symbol;Acc:MGI:1202305]
ENSMUSG00000031980	123.633	-1.84137	0.235936	-7.80454	5.97E-15	3.27E-13	41.3874	47.0308	73.9299	182.274	208.145	189.031	Agt	angiotensinogen [Source:MGI Symbol;Acc:MGI:87963]
ENSMUSG00000025809	31.706	-1.83644	0.500339	-3.6704	0.00024217	0.00301327	5.70861	19.3656	16.5965	57.4045	63.3191	27.8418	Itgb1	integrin beta 1 (fibronectin receptor beta) [Source:MGI Symbol;Acc:MGI:96610]
ENSMUSG00000037260	21.0825	-1.8261	0.656407	-2.78197	0.00540301	0.0387161	0	6.91629	21.1228	25.4474	36.3748	36.6339	Hgsnat	heparan-alpha-glucosaminide N-acetyltransferase [Source:MGI Symbol;Acc:MGI:1196297]
ENSMUSG00000010307	17.3431	-1.8205	0.626822	-2.90433	0.00368038	0.0286321	9.99007	6.91629	6.0351	23.672	38.3956	19.0496	Tmem86a	transmembrane protein 86A [Source:MGI Symbol;Acc:MGI:1915143]
ENSMUSG00000057193	40.3406	-1.80419	0.493935	-3.65269	0.000259508	0.00319056	4.28146	38.7312	10.5614	70.4241	49.1733	68.8718	Slc44a2	solute carrier family 44, member 2 [Source:MGI Symbol;Acc:MGI:1915932]
ENSMUSG00000010554	22.2493	-1.77531	0.532752	-3.33234	0.000861184	0.00898372	9.99007	9.68281	10.5614	37.8752	39.7428	25.6438	Mettl16	methyltransferase 16, N6-methyladenosine [Source:MGI Symbol;Acc:MGI:1914743]
ENSMUSG00000023942	21.9824	-1.77374	0.560793	-3.16292	0.00156193	0.0146146	8.56292	16.5991	4.52632	43.2013	28.9651	30.0398	Slc29a1	solute carrier family 29 (nucleoside transporters), member 1 [Source:MGI Symbol;Acc:MGI:1927073]
ENSMUSG00000021913	26.3734	-1.7608	0.478702	-3.67828	0.000234811	0.00293495	12.8444	9.68281	13.579	37.8752	41.7636	42.4954	Ogdhl	oxoglutarate dehydrogenase-like [Source:MGI Symbol;Acc:MGI:3616088]
ENSMUSG00000050953	60.8517	-1.73967	0.388648	-4.47621	7.60E-06	0.000137365	8.56292	51.1806	24.1404	101.198	94.305	85.7234	Gja1	gap junction protein, alpha 1 [Source:MGI Symbol;Acc:MGI:95713]
ENSMUSG00000070644	17.4858	-1.7195	0.606307	-2.83601	0.00456806	0.0340318	11.4172	6.91629	6.0351	21.3048	26.2707	32.9705	Etnk2	ethanolamine kinase 2 [Source:MGI Symbol;Acc:MGI:2443760]
ENSMUSG00000030494	27.6694	-1.71256	0.584109	-2.93191	0.0033688	0.0268399	29.9702	2.76652	6.0351	41.4259	32.3331	53.4855	Rhpn2	rhophilin, Rho GTPase binding protein 2 [Source:MGI Symbol;Acc:MGI:1289234]
ENSMUSG00000031808	32.3817	-1.69982	0.437274	-3.8873	0.000101364	0.00141437	12.8444	22.1321	10.5614	48.5275	51.8677	48.3568	Slc27a1	solute carrier family 27 (fatty acid transporter), member 1 [Source:MGI Symbol;Acc:MGI:1347098]
ENSMUSG00000040488	69.7378	-1.69349	0.361546	-4.68404	2.81E-06	5.46E-05	35.6788	15.2158	48.2808	75.7503	147.52	95.9809	Ltbp4	latent transforming growth factor beta binding protein 4 [Source:MGI Symbol;Acc:MGI:1321395]
ENSMUSG00000034160	24.9791	-1.67125	0.552531	-3.02472	0.00248863	0.0211751	11.4172	13.8326	10.5614	37.8752	58.6038	17.5843	Ogt	O-linked N-acetylglucosamine (GlcNAc) transferase (UDP-N-acetylglucosamine:polypeptide-N-acetylglucosaminyl transferase) [Source:MGI Symbol;Acc:MGI:1339639]
ENSMUSG00000057880	30.9543	-1.66603	0.494212	-3.37108	0.000748745	0.00797182	28.5431	8.29955	7.54387	39.0587	45.1317	57.1489	Abat	4-aminobutyrate aminotransferase [Source:MGI Symbol;Acc:MGI:2443582]
ENSMUSG00000030647	25.7234	-1.6516	0.548909	-3.00889	0.00262208	0.0219935	22.8345	6.91629	7.54387	48.5275	45.8053	22.713	Ndufc2	NADH:ubiquinone oxidoreductase subunit C2 [Source:MGI Symbol;Acc:MGI:1344370]
ENSMUSG00000040236	46.9541	-1.6383	0.395118	-4.14637	3.38E-05	0.000538772	14.2715	35.9647	18.1053	79.3011	83.5273	50.5548	Trappc5	trafficking protein particle complex 5 [Source:MGI Symbol;Acc:MGI:1913932]
ENSMUSG00000037852	156.296	-1.62751	0.207402	-7.84712	4.26E-15	2.38E-13	94.1921	76.0792	58.8422	266.31	227.679	214.675	Cpe	carboxypeptidase E [Source:MGI Symbol;Acc:MGI:101932]
ENSMUSG00000033577	31.2414	-1.62206	0.451155	-3.59535	0.000323954	0.00389027	24.2616	11.0661	10.5614	43.7931	46.4789	51.2875	Myo6	myosin VI [Source:MGI Symbol;Acc:MGI:104785]
ENSMUSG00000025236	22.5984	-1.62036	0.552515	-2.9327	0.00336025	0.0267977	2.85431	12.4493	18.1053	34.9162	35.0276	32.2379	Adpgk	ADP-dependent glucokinase [Source:MGI Symbol;Acc:MGI:1919391]
ENSMUSG00000034219	40.8816	-1.61491	0.407105	-3.96681	7.28E-05	0.00106705	27.1159	15.2158	18.1053	62.1389	79.4856	43.228	Septin14	septin 14 [Source:MGI Symbol;Acc:MGI:1921472]
ENSMUSG00000067158	35.1489	-1.61363	0.418	-3.86035	0.000113225	0.00156171	15.6987	15.2158	21.1228	56.2209	41.09	61.545	Col4a4	collagen, type IV, alpha 4 [Source:MGI Symbol;Acc:MGI:104687]
ENSMUSG00000027444	30.4196	-1.58186	0.514943	-3.07192	0.00212686	0.0186739	12.8444	20.7489	12.0702	49.7111	67.3607	19.7823	Cstdc1	cystatin domain containing 1 [Source:MGI Symbol;Acc:MGI:1925859]
ENSMUSG00000037625	62.0482	-1.57877	0.335325	-4.70817	2.50E-06	4.91E-05	34.2517	33.1982	25.6492	76.9339	74.7704	127.486	Cldn11	claudin 11 [Source:MGI Symbol;Acc:MGI:106925]
ENSMUSG00000024188	23.9722	-1.57538	0.501306	-3.14255	0.00167481	0.0154262	11.4172	9.68281	15.0877	30.1818	35.7012	41.7627	Luc7l	Luc7-like [Source:MGI Symbol;Acc:MGI:1914228]
ENSMUSG00000031119	44.3823	-1.55413	0.367459	-4.2294	2.34E-05	0.000385641	14.2715	26.2819	27.1579	68.6487	63.9927	65.9411	Gpc4	glypican 4 [Source:MGI Symbol;Acc:MGI:104902]
ENSMUSG00000024054	34.5538	-1.53367	0.446989	-3.4311	0.000601135	0.0066045	29.9702	9.68281	13.579	46.7521	62.6455	44.6934	Smchd1	SMC hinge domain containing 1 [Source:MGI Symbol;Acc:MGI:1921605]
ENSMUSG00000096472	35.4414	-1.5323	0.429955	-3.56385	0.000365453	0.00430724	25.6888	15.2158	13.579	37.2834	58.6038	62.2777	Cdkn2d	cyclin dependent kinase inhibitor 2D [Source:MGI Symbol;Acc:MGI:105387]
ENSMUSG00000024665	55.3542	-1.52244	0.358023	-4.25237	2.12E-05	0.000349522	14.2715	45.6475	25.6492	88.1781	82.1801	76.1986	Fads2	fatty acid desaturase 2 [Source:MGI Symbol;Acc:MGI:1930079]
ENSMUSG00000036391	22.2373	-1.50746	0.525501	-2.86861	0.00412279	0.0315393	7.13577	11.0661	16.5965	27.8146	36.3748	34.4359	Sec24a	SEC24 homolog A, COPII coat complex component [Source:MGI Symbol;Acc:MGI:1924621]
ENSMUSG00000064063	282.992	-1.49155	0.145406	-10.2578	1.09E-24	1.07E-22	142.715	161.841	140.316	382.302	430.435	440.34	BC048507	cDNA sequence BC048507 [Source:MGI Symbol;Acc:MGI:3040680]
ENSMUSG00000031451	26.5697	-1.48362	0.537042	-2.76258	0.00573467	0.0407043	19.9801	4.14978	18.1053	53.2619	39.7428	24.1784	Gas6	growth arrest specific 6 [Source:MGI Symbol;Acc:MGI:95660]
ENSMUSG00000033161	104.997	-1.4812	0.247759	-5.97837	2.25E-09	6.96E-08	48.5232	48.4141	69.4036	139.073	142.131	182.437	Atp1a1	ATPase, Na+/K+ transporting, alpha 1 polypeptide [Source:MGI Symbol;Acc:MGI:88105]
ENSMUSG00000028763	97.2622	-1.48054	0.241519	-6.13012	8.78E-10	2.88E-08	45.6689	53.9471	54.3159	138.481	138.763	152.397	Hspg2	perlecan (heparan sulfate proteoglycan 2) [Source:MGI Symbol;Acc:MGI:96257]
ENSMUSG00000017009	44.6864	-1.46867	0.407682	-3.60249	0.000315186	0.00379602	9.99007	20.7489	40.7369	59.7717	76.7912	60.0797	Sdc4	syndecan 4 [Source:MGI Symbol;Acc:MGI:1349164]
ENSMUSG00000022390	57.8041	-1.46561	0.382308	-3.83359	0.000126285	0.00170764	22.8345	55.3303	13.579	82.8519	99.6938	72.5352	Zc3h7b	zinc finger CCCH type containing 7B [Source:MGI Symbol;Acc:MGI:1328310]
ENSMUSG00000026576	71.4428	-1.45897	0.295838	-4.93166	8.15E-07	1.73E-05	45.6689	45.6475	22.6316	103.565	107.104	104.04	Atp1b1	ATPase, Na+/K+ transporting, beta 1 polypeptide [Source:MGI Symbol;Acc:MGI:88108]
ENSMUSG00000092035	44.411	-1.45663	0.443136	-3.28711	0.00101223	0.0103106	29.9702	11.0661	30.1755	41.4259	50.5205	103.308	Peg10	paternally expressed 10 [Source:MGI Symbol;Acc:MGI:2157785]
ENSMUSG00000056899	50.1487	-1.45643	0.345278	-4.21814	2.46E-05	0.000401408	34.2517	26.2819	19.6141	63.9143	74.7704	82.06	Immp2l	IMP2 inner mitochondrial membrane peptidase-like (S. cerevisiae) [Source:MGI Symbol;Acc:MGI:2135611]
ENSMUSG00000037752	48.7417	-1.44763	0.388566	-3.72557	0.000194878	0.00248087	25.6888	38.7312	13.579	52.0783	70.0551	92.3175	Xkr8	X-linked Kx blood group related 8 [Source:MGI Symbol;Acc:MGI:2685877]
ENSMUSG00000025510	39.0374	-1.43156	0.452798	-3.16158	0.00156917	0.0146657	4.28146	30.4317	28.6667	52.0783	66.0135	52.7529	Cd151	CD151 antigen [Source:MGI Symbol;Acc:MGI:1096360]
ENSMUSG00000027342	28.1959	-1.42114	0.470746	-3.01891	0.00253684	0.0215189	21.4073	12.4493	12.0702	40.2423	30.9859	52.0202	Pcna	proliferating cell nuclear antigen [Source:MGI Symbol;Acc:MGI:97503]
ENSMUSG00000020805	42.4222	-1.41359	0.435178	-3.2483	0.00116096	0.0113859	38.5331	6.91629	24.1404	60.3635	49.8469	74.7332	Slc13a5	solute carrier family 13 (sodium-dependent citrate transporter), member 5 [Source:MGI Symbol;Acc:MGI:3037150]
ENSMUSG00000022912	51.541	-1.40977	0.368809	-3.82249	0.000132109	0.00177109	34.2517	30.4317	19.6141	69.8323	52.5413	102.575	Pros1	protein S (alpha) [Source:MGI Symbol;Acc:MGI:1095733]
ENSMUSG00000028961	36.7554	-1.39939	0.402446	-3.47722	0.000506639	0.00571837	19.9801	15.2158	25.6492	58.5881	58.6038	42.4954	Pgd	phosphogluconate dehydrogenase [Source:MGI Symbol;Acc:MGI:97553]
ENSMUSG00000013083	65.7909	-1.38639	0.302861	-4.57764	4.70E-06	8.89E-05	31.3974	42.881	34.7018	79.3011	93.6314	112.833	2200002J24Rik	RIKEN cDNA 2200002J24 gene [Source:MGI Symbol;Acc:MGI:1916397]
ENSMUSG00000020153	24.9748	-1.38596	0.497634	-2.7851	0.0053512	0.0385791	15.6987	16.5991	9.05265	31.3654	47.8261	29.3071	Ndufs7	NADH:ubiquinone oxidoreductase core subunit S7 [Source:MGI Symbol;Acc:MGI:1922656]
ENSMUSG00000078622	37.2546	-1.38508	0.387361	-3.57568	0.000349321	0.00414074	22.8345	17.9824	21.1228	57.4045	48.4997	55.6836	Ccdc47	coiled-coil domain containing 47 [Source:MGI Symbol;Acc:MGI:1914413]
ENSMUSG00000032348	97.3766	-1.37954	0.294066	-4.69127	2.72E-06	5.29E-05	74.212	23.5154	64.8773	131.971	155.603	134.08	Gsta4	glutathione S-transferase, alpha 4 [Source:MGI Symbol;Acc:MGI:1309515]
ENSMUSG00000022437	39.8108	-1.37889	0.453185	-3.04266	0.00234497	0.0201395	37.106	11.0661	18.1053	48.5275	39.0692	84.9907	Samm50	SAMM50 sorting and assembly machinery component [Source:MGI Symbol;Acc:MGI:1915903]
ENSMUSG00000020733	27.5305	-1.37425	0.471608	-2.91397	0.00356868	0.0280004	15.6987	16.5991	13.579	27.8146	51.1941	40.2973	Nherf1	NHERF family PDZ scaffold protein 1 [Source:MGI Symbol;Acc:MGI:1349482]
ENSMUSG00000039742	2667.79	-1.37016	0.0504777	-27.1439	2.99E-162	8.24E-159	1395.76	1525.73	1543.48	3802.31	3766.14	3973.32	Garin1b	golgi associated RAB2 interactor 1B [Source:MGI Symbol;Acc:MGI:3032524]
ENSMUSG00000004393	33.8697	-1.36892	0.446265	-3.06751	0.00215847	0.0188912	17.1258	9.68281	30.1755	40.2423	61.2982	44.6934	Ddx56	DEAD box helicase 56 [Source:MGI Symbol;Acc:MGI:1277172]
ENSMUSG00000032902	49.2774	-1.36055	0.385717	-3.52731	0.000419798	0.00485767	17.1258	19.3656	46.772	78.7093	54.5622	79.1293	Slc16a1	solute carrier family 16 (monocarboxylic acid transporters), member 1 [Source:MGI Symbol;Acc:MGI:106013]
ENSMUSG00000002602	42.572	-1.35996	0.387972	-3.5053	0.000456092	0.00523828	31.3974	23.5154	16.5965	56.8127	79.4856	47.6241	Axl	AXL receptor tyrosine kinase [Source:MGI Symbol;Acc:MGI:1347244]
ENSMUSG00000024140	51.172	-1.35728	0.356779	-3.80426	0.000142228	0.00188921	35.6788	27.6652	22.6316	51.4865	88.2425	81.3273	Epas1	endothelial PAS domain protein 1 [Source:MGI Symbol;Acc:MGI:109169]
ENSMUSG00000021939	38.9066	-1.35493	0.397965	-3.40465	0.000662477	0.00711754	18.553	33.1982	13.579	56.2209	52.5413	59.347	Ctsb	cathepsin B [Source:MGI Symbol;Acc:MGI:88561]
ENSMUSG00000027875	43.2424	-1.3542	0.369175	-3.66819	0.000244278	0.00303149	28.5431	27.6652	16.5965	70.4241	53.215	63.0104	Hmgcs2	3-hydroxy-3-methylglutaryl-Coenzyme A synthase 2 [Source:MGI Symbol;Acc:MGI:101939]
ENSMUSG00000027962	57.3827	-1.34338	0.362374	-3.70716	0.000209596	0.00265595	49.9504	30.4317	16.5965	60.9553	88.9161	97.4463	Vcam1	vascular cell adhesion molecule 1 [Source:MGI Symbol;Acc:MGI:98926]
ENSMUSG00000091556	141.639	-1.32747	0.202379	-6.55937	5.40E-11	2.19E-09	79.9206	71.9294	90.5265	188.192	223.638	195.625	Gm14569	predicted gene 14569 [Source:MGI Symbol;Acc:MGI:3705243]
ENSMUSG00000020263	32.8315	-1.32586	0.418852	-3.16545	0.00154842	0.0145376	12.8444	20.7489	22.6316	49.1193	41.09	50.5548	Appl2	adaptor protein, phosphotyrosine interaction, PH domain and leucine zipper containing 2 [Source:MGI Symbol;Acc:MGI:2384914]
ENSMUSG00000039952	64.4994	-1.32387	0.2954	-4.48161	7.41E-06	0.000134518	35.6788	42.881	31.6843	89.3617	85.5481	101.842	Dag1	dystroglycan 1 [Source:MGI Symbol;Acc:MGI:101864]
ENSMUSG00000079111	50.2797	-1.32272	0.334748	-3.9514	7.77E-05	0.00112618	29.9702	29.0484	27.1579	81.6683	61.2982	72.5352	Kdelr2	KDEL (Lys-Asp-Glu-Leu) endoplasmic reticulum protein retention receptor 2 [Source:MGI Symbol;Acc:MGI:1914163]
ENSMUSG00000025056	69.0455	-1.31579	0.332785	-3.95388	7.69E-05	0.00111651	35.6788	26.2819	57.3334	129.604	94.305	71.0698	Nr0b1	nuclear receptor subfamily 0, group B, member 1 [Source:MGI Symbol;Acc:MGI:1352460]
ENSMUSG00000021712	51.8572	-1.31344	0.340096	-3.86197	0.000112476	0.0015561	24.2616	33.1982	31.6843	57.4045	78.1384	86.4561	Trim23	tripartite motif-containing 23 [Source:MGI Symbol;Acc:MGI:1933161]
ENSMUSG00000026223	92.1999	-1.29791	0.255823	-5.07344	3.91E-07	8.87E-06	55.659	45.6475	58.8422	143.807	107.104	142.14	Itm2c	integral membrane protein 2C [Source:MGI Symbol;Acc:MGI:1927594]
ENSMUSG00000058267	36.6976	-1.29693	0.422146	-3.07222	0.00212471	0.0186739	28.5431	11.0661	24.1404	42.6095	47.1525	66.6738	Mrps14	mitochondrial ribosomal protein S14 [Source:MGI Symbol;Acc:MGI:1928141]
ENSMUSG00000030428	34.3138	-1.29253	0.440438	-2.93464	0.00333936	0.0266826	15.6987	33.1982	10.5614	56.2209	49.1733	41.03	Ttyh1	tweety family member 1 [Source:MGI Symbol;Acc:MGI:1889007]
ENSMUSG00000032870	36.4639	-1.27403	0.452012	-2.81857	0.00482374	0.0354887	28.5431	29.0484	6.0351	40.8341	49.8469	64.4757	Smap2	small ArfGAP 2 [Source:MGI Symbol;Acc:MGI:1917030]
ENSMUSG00000069049	28.634	-1.27332	0.447353	-2.84634	0.0044225	0.0332472	19.9801	16.5991	13.579	35.508	37.0484	49.0895	Eif2s3y	eukaryotic translation initiation factor 2, subunit 3, structural gene Y-linked [Source:MGI Symbol;Acc:MGI:1349430]
ENSMUSG00000038034	36.6175	-1.27329	0.450379	-2.82716	0.00469628	0.0346963	37.106	16.5991	10.5614	69.8323	43.1109	42.4954	Igsf8	immunoglobulin superfamily, member 8 [Source:MGI Symbol;Acc:MGI:2154090]
ENSMUSG00000032554	30.1498	-1.27011	0.443108	-2.86637	0.00415203	0.0317043	14.2715	22.1321	16.5965	43.7931	51.8677	32.2379	Trf	transferrin [Source:MGI Symbol;Acc:MGI:98821]
ENSMUSG00000031342	29.1271	-1.26561	0.451978	-2.80016	0.00510771	0.0371806	18.553	23.5154	9.05265	42.0177	38.3956	43.228	Gpm6b	glycoprotein m6b [Source:MGI Symbol;Acc:MGI:107672]
ENSMUSG00000035704	37.3777	-1.26445	0.426371	-2.96562	0.00302075	0.0245644	19.9801	29.0484	16.5965	31.9572	59.2774	67.4064	Alg8	ALG8 alpha-1,3-glucosyltransferase [Source:MGI Symbol;Acc:MGI:2141959]
ENSMUSG00000001435	45.9728	-1.26112	0.396639	-3.17952	0.00147521	0.0139773	41.3874	29.0484	10.5614	78.1175	55.9094	60.8123	Col18a1	collagen, type XVIII, alpha 1 [Source:MGI Symbol;Acc:MGI:88451]
ENSMUSG00000070697	36.4509	-1.25137	0.410889	-3.04551	0.00232284	0.0200018	32.8245	13.8326	18.1053	57.9963	50.5205	45.4261	Utp3	UTP3 small subunit processome component [Source:MGI Symbol;Acc:MGI:1919230]
ENSMUSG00000086361	34.7612	-1.23895	0.413193	-2.99849	0.00271322	0.0226202	28.5431	12.4493	21.1228	43.7931	49.1733	53.4855	Gm6569	predicted gene 6569 [Source:MGI Symbol;Acc:MGI:3647277]
ENSMUSG00000028567	95.3409	-1.23267	0.25854	-4.7678	1.86E-06	3.72E-05	55.659	38.7312	76.9475	143.215	130.006	127.486	Txndc12	thioredoxin domain containing 12 (endoplasmic reticulum) [Source:MGI Symbol;Acc:MGI:1913323]
ENSMUSG00000040249	151.292	-1.22945	0.191685	-6.41389	1.42E-10	5.48E-09	78.4934	103.744	89.0177	214.823	212.86	208.813	Lrp1	low density lipoprotein receptor-related protein 1 [Source:MGI Symbol;Acc:MGI:96828]
ENSMUSG00000026712	79.1651	-1.22921	0.304425	-4.03781	5.40E-05	0.000811941	52.8047	51.1806	37.7194	104.157	77.4648	151.664	Mrc1	mannose receptor, C type 1 [Source:MGI Symbol;Acc:MGI:97142]
ENSMUSG00000040485	33.1698	-1.21582	0.429585	-2.83021	0.0046517	0.0344994	22.8345	24.8987	12.0702	56.2209	47.8261	35.1686	Lrrc52	leucine rich repeat containing 52 [Source:MGI Symbol;Acc:MGI:1924118]
ENSMUSG00000030744	45.4076	-1.21271	0.346663	-3.49824	0.000468338	0.00535188	28.5431	24.8987	28.6667	55.6291	68.0343	66.6738	Rps3	ribosomal protein S3 [Source:MGI Symbol;Acc:MGI:1350917]
ENSMUSG00000020273	40.6594	-1.20992	0.379921	-3.18466	0.00144922	0.0137468	25.6888	17.9824	30.1755	57.9963	66.6871	45.4261	Papolg	poly(A) polymerase gamma [Source:MGI Symbol;Acc:MGI:2442119]
ENSMUSG00000005142	46.2711	-1.20899	0.36593	-3.30388	0.00095358	0.00982354	25.6888	20.7489	37.7194	71.0159	74.0968	48.3568	Man2b1	mannosidase 2, alpha B1 [Source:MGI Symbol;Acc:MGI:107286]
ENSMUSG00000027463	65.2305	-1.20565	0.391429	-3.08012	0.00206916	0.0183427	64.2219	17.9824	36.2106	95.8715	52.5413	124.555	Slc52a3	solute carrier protein family 52, member 3 [Source:MGI Symbol;Acc:MGI:1916948]
ENSMUSG00000003363	59.9017	-1.19985	0.36885	-3.25294	0.00114218	0.0113014	44.2417	15.2158	49.7896	59.1799	103.062	87.9214	Pld3	phospholipase D family member 3 [Source:MGI Symbol;Acc:MGI:1333782]
ENSMUSG00000021477	615.06	-1.19722	0.103432	-11.575	5.52E-31	7.02E-29	385.331	403.912	330.422	882.373	782.731	905.591	Ctsl	cathepsin L [Source:MGI Symbol;Acc:MGI:88564]
ENSMUSG00000028127	31.4736	-1.19548	0.419648	-2.84878	0.00438872	0.0331441	18.553	22.1321	16.5965	42.6095	38.3956	50.5548	Abcd3	ATP-binding cassette, sub-family D member 3 [Source:MGI Symbol;Acc:MGI:1349216]
ENSMUSG00000034653	43.0531	-1.19301	0.393324	-3.03314	0.00242023	0.0206783	12.8444	41.4978	24.1404	66.2815	58.6038	54.9509	Ythdc2	YTH domain containing 2 [Source:MGI Symbol;Acc:MGI:2448561]
ENSMUSG00000025268	44.0221	-1.18645	0.40182	-2.95269	0.00315013	0.0254164	22.8345	30.4317	27.1579	33.7326	69.3815	80.5947	Maged2	MAGE family member D2 [Source:MGI Symbol;Acc:MGI:1933391]
ENSMUSG00000042104	64.8516	-1.18451	0.332956	-3.55757	0.000374305	0.00439277	49.9504	42.881	25.6492	73.3831	73.4232	123.823	Uggt2	UDP-glucose glycoprotein glucosyltransferase 2 [Source:MGI Symbol;Acc:MGI:1913685]
ENSMUSG00000018593	379.155	-1.17981	0.125849	-9.3748	6.93E-21	5.45E-19	259.742	200.572	236.878	531.436	551.011	495.291	Sparc	secreted acidic cysteine rich glycoprotein [Source:MGI Symbol;Acc:MGI:98373]
ENSMUSG00000028292	37.546	-1.16977	0.421925	-2.77247	0.00556327	0.0396924	29.9702	15.2158	24.1404	49.1193	35.0276	71.8025	Rars2	arginyl-tRNA synthetase 2, mitochondrial [Source:MGI Symbol;Acc:MGI:1923596]
ENSMUSG00000032383	39.3328	-1.15385	0.377585	-3.05588	0.00224405	0.0194547	17.1258	31.8149	24.1404	52.6701	54.5622	55.6836	Ppib	peptidylprolyl isomerase B [Source:MGI Symbol;Acc:MGI:97750]
ENSMUSG00000031966	125.943	-1.14938	0.272299	-4.22101	2.43E-05	0.000397903	37.106	118.96	78.4563	171.03	168.402	181.704	Glb1l3	galactosidase, beta 1 like 3 [Source:MGI Symbol;Acc:MGI:1918143]
ENSMUSG00000038417	40.6301	-1.14164	0.414362	-2.75517	0.00586625	0.0414602	21.4073	33.1982	21.1228	34.9162	52.5413	80.5947	Fig4	FIG4 phosphoinositide 5-phosphatase [Source:MGI Symbol;Acc:MGI:2143585]
ENSMUSG00000049123	114.871	-1.13833	0.216133	-5.2668	1.39E-07	3.39E-06	72.7848	76.0792	66.3861	166.887	157.624	149.466	Catsperg2	cation channel sperm associated auxiliary subunit gamma 2 [Source:MGI Symbol;Acc:MGI:1923968]
ENSMUSG00000002814	42.9357	-1.13824	0.367476	-3.09744	0.00195198	0.0176062	35.6788	22.1321	22.6316	62.7307	48.4997	65.9411	Top3a	topoisomerase (DNA) III alpha [Source:MGI Symbol;Acc:MGI:1197527]
ENSMUSG00000037681	73.5694	-1.13298	0.308972	-3.66694	0.000245472	0.00304062	62.7947	33.1982	42.2457	105.932	73.4232	123.823	Esyt3	extended synaptotagmin-like protein 3 [Source:MGI Symbol;Acc:MGI:1098699]
ENSMUSG00000047879	41.4606	-1.12743	0.403158	-2.79648	0.00516621	0.0375072	24.2616	41.4978	12.0702	63.9143	57.9302	49.0895	Usp14	ubiquitin specific peptidase 14 [Source:MGI Symbol;Acc:MGI:1928898]
ENSMUSG00000006373	37.4866	-1.12391	0.410795	-2.73593	0.00622048	0.0434505	12.8444	24.8987	33.193	61.5471	40.4164	52.0202	Pgrmc1	progesterone receptor membrane component 1 [Source:MGI Symbol;Acc:MGI:1858305]
ENSMUSG00000024640	40.2026	-1.12264	0.394208	-2.84783	0.00440185	0.0331826	34.2517	24.8987	16.5965	44.9767	71.4023	49.0895	Psat1	phosphoserine aminotransferase 1 [Source:MGI Symbol;Acc:MGI:2183441]
ENSMUSG00000019179	39.4588	-1.12193	0.390516	-2.87294	0.00406673	0.0311682	18.553	31.8149	24.1404	53.8537	67.3607	41.03	Mdh2	malate dehydrogenase 2, NAD (mitochondrial) [Source:MGI Symbol;Acc:MGI:97050]
ENSMUSG00000020368	726.935	-1.12146	0.090921	-12.3344	5.91E-35	9.21E-33	422.437	455.092	496.387	952.205	1051.5	983.988	Canx	calnexin [Source:MGI Symbol;Acc:MGI:88261]
ENSMUSG00000047126	554.785	-1.11675	0.121031	-9.22695	2.78E-20	2.11E-18	421.01	327.832	301.755	839.763	759.155	679.193	Cltc	clathrin heavy chain [Source:MGI Symbol;Acc:MGI:2388633]
ENSMUSG00000000628	88.4929	-1.11668	0.307497	-3.63151	0.000281763	0.00342342	41.3874	33.1982	93.544	110.075	117.208	135.546	Hk2	hexokinase 2 [Source:MGI Symbol;Acc:MGI:1315197]
ENSMUSG00000007097	81.431	-1.11152	0.29032	-3.8286	0.000128876	0.00173699	29.9702	53.9471	70.9124	101.789	128.659	103.308	Atp1a2	ATPase, Na+/K+ transporting, alpha 2 polypeptide [Source:MGI Symbol;Acc:MGI:88106]
ENSMUSG00000085684	43.258	-1.11144	0.407569	-2.727	0.00639136	0.0443359	11.4172	33.1982	37.7194	73.9749	59.2774	43.9607	4930469K13Rik	RIKEN cDNA 4930469K13 gene [Source:MGI Symbol;Acc:MGI:1924124]
ENSMUSG00000037286	70.8824	-1.10653	0.315782	-3.50411	0.000458144	0.00524991	37.106	53.9471	43.7545	114.217	61.9718	114.298	Stag1	STAG1 cohesin complex component [Source:MGI Symbol;Acc:MGI:1098658]
ENSMUSG00000067873	79.2295	-1.10632	0.269469	-4.10555	4.03E-05	0.000633558	64.2219	45.6475	40.7369	107.116	99.6938	117.961	Htatsf1	HIV TAT specific factor 1 [Source:MGI Symbol;Acc:MGI:1919709]
ENSMUSG00000072995	85.2858	-1.10256	0.254963	-4.32438	1.53E-05	0.000261654	59.9404	51.1806	51.2983	101.789	118.555	128.951	Cpxcr1	CPX chromosome region, candidate 1 [Source:MGI Symbol;Acc:MGI:2685989]
ENSMUSG00000020059	264.305	-1.09651	0.162964	-6.72855	1.71E-11	7.11E-10	176.967	181.207	146.351	333.775	315.248	432.28	Sycp3	synaptonemal complex protein 3 [Source:MGI Symbol;Acc:MGI:109542]
ENSMUSG00000025130	83.3963	-1.093	0.287863	-3.79693	0.000146497	0.00193348	45.6689	35.9647	78.4563	100.014	109.124	131.149	P4hb	prolyl 4-hydroxylase, beta polypeptide [Source:MGI Symbol;Acc:MGI:97464]
ENSMUSG00000030826	41.7311	-1.09059	0.394663	-2.76333	0.00572144	0.0406454	22.8345	37.348	19.6141	63.3225	38.3956	68.8718	Bcat2	branched chain aminotransferase 2, mitochondrial [Source:MGI Symbol;Acc:MGI:1276534]
ENSMUSG00000030847	53.6131	-1.0873	0.330911	-3.28577	0.00101703	0.0103228	35.6788	41.4978	25.6492	78.1175	82.8537	57.8816	Bag3	BCL2-associated athanogene 3 [Source:MGI Symbol;Acc:MGI:1352493]
ENSMUSG00000005481	83.7862	-1.08574	0.256875	-4.22673	2.37E-05	0.000388686	62.7947	47.0308	51.2983	126.053	107.104	108.436	Ddx39a	DEAD box helicase 39a [Source:MGI Symbol;Acc:MGI:1915528]
ENSMUSG00000060376	57.765	-1.08358	0.307386	-3.52514	0.000423255	0.00489081	31.3974	34.5815	45.2632	76.9339	73.4232	84.9907	Bckdha	branched chain ketoacid dehydrogenase E1, alpha polypeptide [Source:MGI Symbol;Acc:MGI:107701]
ENSMUSG00000025925	98.3218	-1.07946	0.264151	-4.08652	4.38E-05	0.000680049	74.212	38.7312	76.9475	124.278	155.603	120.159	Terf1	telomeric repeat binding factor 1 [Source:MGI Symbol;Acc:MGI:109634]
ENSMUSG00000005470	85.6502	-1.07922	0.250985	-4.29992	1.71E-05	0.000288089	61.3676	56.7136	46.772	109.483	117.208	122.357	Asf1b	anti-silencing function 1B histone chaperone [Source:MGI Symbol;Acc:MGI:1914179]
ENSMUSG00000019929	42.4818	-1.0755	0.369788	-2.90842	0.00363259	0.0284108	19.9801	29.0484	33.193	70.4241	53.8886	48.3568	Dcn	decorin [Source:MGI Symbol;Acc:MGI:94872]
ENSMUSG00000022037	2295.68	-1.07398	0.0561145	-19.139	1.19E-81	6.58E-79	1604.12	1365.28	1466.53	3020.54	3161.24	3156.38	Clu	clusterin [Source:MGI Symbol;Acc:MGI:88423]
ENSMUSG00000042961	50.7743	-1.07383	0.34955	-3.07204	0.00212603	0.0186739	45.6689	20.7489	31.6843	58.5881	67.3607	80.5947	Egflam	EGF-like, fibronectin type III and laminin G domains [Source:MGI Symbol;Acc:MGI:2146149]
ENSMUSG00000005220	64.9528	-1.06877	0.305661	-3.49657	0.000471272	0.00537797	47.0961	49.7973	28.6667	98.2387	71.4023	94.5156	Corin	corin, serine peptidase [Source:MGI Symbol;Acc:MGI:1349451]
ENSMUSG00000053279	122.275	-1.06326	0.269316	-3.94799	7.88E-05	0.00113832	39.9603	78.8457	119.193	175.764	170.423	149.466	Aldh1a1	aldehyde dehydrogenase family 1, subfamily A1 [Source:MGI Symbol;Acc:MGI:1353450]
ENSMUSG00000109858	63.3608	-1.06264	0.318543	-3.33595	0.000850097	0.00891307	38.5331	53.9471	30.1755	63.9143	98.3466	95.2482	Pfn5	profilin 5 [Source:MGI Symbol;Acc:MGI:5804915]
ENSMUSG00000062773	238.661	-1.05877	0.16281	-6.5031	7.87E-11	3.14E-09	178.394	159.075	126.737	337.917	345.56	284.279	Tex101	testis expressed gene 101 [Source:MGI Symbol;Acc:MGI:1930791]
ENSMUSG00000041550	106.523	-1.04887	0.25698	-4.08152	4.47E-05	0.00069179	57.0861	56.7136	95.0528	149.725	167.728	112.833	Serpina5	serine (or cysteine) peptidase inhibitor, clade A, member 5 [Source:MGI Symbol;Acc:MGI:107817]
ENSMUSG00000024253	48.5415	-1.04481	0.356852	-2.92785	0.00341314	0.0271148	45.6689	19.3656	30.1755	66.8733	72.7496	56.4163	Dync2li1	dynein cytoplasmic 2 light intermediate chain 1 [Source:MGI Symbol;Acc:MGI:1913996]
ENSMUSG00000029517	92.6427	-1.04436	0.268459	-3.89021	0.000100156	0.00140015	49.9504	81.6123	49.7896	140.256	136.069	98.1789	Ankrd7	ankyrin repeat domain 7 [Source:MGI Symbol;Acc:MGI:1922446]
ENSMUSG00000041958	62.3737	-1.03947	0.302175	-3.43995	0.000581826	0.00644039	39.9603	35.9647	46.772	97.0551	68.0343	86.4561	Pigs	phosphatidylinositol glycan anchor biosynthesis, class S [Source:MGI Symbol;Acc:MGI:2687325]
ENSMUSG00000052133	43.6846	-1.03764	0.37354	-2.77785	0.00547191	0.0391108	17.1258	42.881	25.6492	55.6291	59.2774	61.545	Sema5b	sema domain, seven thrombospondin repeats (type 1 and type 1-like), transmembrane domain (TM) and short cytoplasmic domain, (semaphorin) 5B [Source:MGI Symbol;Acc:MGI:107555]
ENSMUSG00000021194	86.8895	-1.03567	0.289323	-3.57964	0.000344071	0.00409024	32.8245	74.696	63.3685	128.42	91.6106	130.417	Chga	chromogranin A [Source:MGI Symbol;Acc:MGI:88394]
ENSMUSG00000049598	108.545	-1.03111	0.239526	-4.3048	1.67E-05	0.000282964	58.5133	63.6299	92.0352	127.237	142.805	167.051	Vsig8	V-set and immunoglobulin domain containing 8 [Source:MGI Symbol;Acc:MGI:3642995]
ENSMUSG00000020888	56.2751	-1.02092	0.359638	-2.83874	0.00452916	0.0339496	54.2318	16.5991	40.7369	61.5471	78.812	85.7234	Dvl2	dishevelled segment polarity protein 2 [Source:MGI Symbol;Acc:MGI:106613]
ENSMUSG00000022892	159.916	-1.01609	0.199405	-5.0956	3.48E-07	7.93E-06	114.172	87.1453	116.176	191.743	196.02	254.24	App	amyloid beta precursor protein [Source:MGI Symbol;Acc:MGI:88059]
ENSMUSG00000017132	281.24	-1.01529	0.163826	-6.19733	5.74E-10	1.97E-08	242.616	139.709	176.527	389.404	385.303	353.884	Cyth1	cytohesin 1 [Source:MGI Symbol;Acc:MGI:1334257]
ENSMUSG00000045210	88.6727	-1.00893	0.270608	-3.72837	0.000192724	0.00246483	51.3775	70.5462	54.3159	102.973	99.6938	153.13	Vcpip1	valosin containing protein (p97)/p47 complex interacting protein 1 [Source:MGI Symbol;Acc:MGI:1917925]
ENSMUSG00000039187	54.1657	-1.00357	0.327889	-3.0607	0.00220822	0.0192654	24.2616	37.348	46.772	81.6683	65.3399	69.6045	Fanci	Fanconi anemia, complementation group I [Source:MGI Symbol;Acc:MGI:2384790]
ENSMUSG00000019877	47.3446	-1.00301	0.3552	-2.82378	0.00474604	0.0350106	32.8245	35.9647	25.6492	56.2209	82.8537	50.5548	Serinc1	serine incorporator 1 [Source:MGI Symbol;Acc:MGI:1926228]
ENSMUSG00000021414	483.28	1.00075	0.109274	9.15824	5.28E-20	3.93E-18	719.285	616.933	597.475	324.306	344.213	297.468	Fam217a	family with sequence similarity 217, member A [Source:MGI Symbol;Acc:MGI:1919114]
ENSMUSG00000030410	145.945	1.00341	0.189842	5.28553	1.25E-07	3.10E-06	189.811	178.44	215.755	89.3617	90.9369	111.367	Dmwd	dystrophia myotonica-containing WD repeat motif [Source:MGI Symbol;Acc:MGI:94907]
ENSMUSG00000059895	54.3408	1.00366	0.3731	2.69007	0.00714381	0.0484583	89.9106	78.8457	48.2808	24.8556	26.2707	57.8816	Ptp4a3	protein tyrosine phosphatase 4a3 [Source:MGI Symbol;Acc:MGI:1277098]
ENSMUSG00000041165	1147.99	1.00393	0.0672686	14.9242	2.29E-50	5.12E-48	1545.61	1545.1	1505.76	761.054	803.613	726.817	Spem1	spermatid maturation 1 [Source:MGI Symbol;Acc:MGI:1921538]
ENSMUSG00000026778	405.831	1.00814	0.125235	8.05002	8.28E-16	4.92E-14	482.378	634.916	508.457	269.86	249.235	290.141	Prkcq	protein kinase C, theta [Source:MGI Symbol;Acc:MGI:97601]
ENSMUSG00000092518	262.376	1.00831	0.168667	5.97813	2.26E-09	6.96E-08	353.934	312.616	386.246	211.864	179.179	130.417	Garin5b	golgi associated RAB2 interactor family member 5B [Source:MGI Symbol;Acc:MGI:3045311]
ENSMUSG00000029155	2182.71	1.00841	0.0571173	17.6551	9.30E-70	3.66E-67	2718.73	2933.89	3097.51	1493.7	1485.98	1366.45	Spata18	spermatogenesis associated 18 [Source:MGI Symbol;Acc:MGI:1920722]
ENSMUSG00000074063	486.091	1.00857	0.10642	9.47729	2.61E-21	2.09E-19	657.918	641.832	647.264	286.431	331.415	351.686	Osgin1	oxidative stress induced growth inhibitor 1 [Source:MGI Symbol;Acc:MGI:1919089]
ENSMUSG00000037552	58.328	1.01398	0.357268	2.83815	0.00453755	0.0339496	72.7848	96.8281	64.8773	58.5881	36.3748	20.515	Plekhg2	pleckstrin homology domain containing, family G (with RhoGef domain) member 2 [Source:MGI Symbol;Acc:MGI:2141874]
ENSMUSG00000059114	270.319	1.01475	0.144851	7.00547	2.46E-12	1.06E-10	406.739	345.815	331.93	176.356	160.318	200.754	Lrrc74a	leucine rich repeat containing 74A [Source:MGI Symbol;Acc:MGI:3646959]
ENSMUSG00000079652	1018.14	1.01634	0.0727645	13.9675	2.46E-44	4.62E-42	1434.29	1344.53	1309.62	706.016	643.968	670.401	Garin1a	golgi associated RAB2 interactor 1A [Source:MGI Symbol;Acc:MGI:2141439]
ENSMUSG00000020260	38.9959	1.0185	0.366653	2.77783	0.0054723	0.0391108	67.0762	45.6475	43.7545	21.3048	27.6179	28.5745	Pofut2	protein O-fucosyltransferase 2 [Source:MGI Symbol;Acc:MGI:1916863]
ENSMUSG00000033055	114.45	1.02299	0.22741	4.49843	6.85E-06	0.000125685	162.695	112.044	185.579	71.0159	74.7704	80.5947	Ankrd54	ankyrin repeat domain 54 [Source:MGI Symbol;Acc:MGI:2444209]
ENSMUSG00000058183	126.98	1.02354	0.271913	3.76423	0.000167064	0.00217026	174.113	154.925	182.562	127.829	74.0968	48.3568	Mmel1	membrane metallo-endopeptidase-like 1 [Source:MGI Symbol;Acc:MGI:1351603]
ENSMUSG00000008763	63.8663	1.02506	0.282976	3.62242	0.000291854	0.00352827	71.3577	81.6123	104.105	41.4259	45.1317	39.5647	Man1a2	mannosidase, alpha, class 1A, member 2 [Source:MGI Symbol;Acc:MGI:104676]
ENSMUSG00000022463	36.745	1.02829	0.365585	2.81271	0.00491257	0.0360779	54.2318	49.7973	43.7545	20.713	25.5971	26.3764	Srebf2	sterol regulatory element binding factor 2 [Source:MGI Symbol;Acc:MGI:107585]
ENSMUSG00000035601	40.1957	1.03262	0.346416	2.98086	0.00287442	0.0236538	57.0861	58.0969	46.772	26.631	26.9443	25.6438	Trmt10b	tRNA methyltransferase 10B [Source:MGI Symbol;Acc:MGI:1917184]
ENSMUSG00000027562	395.489	1.03698	0.153126	6.77207	1.27E-11	5.32E-10	463.825	471.691	659.334	217.782	244.519	315.785	Car2	carbonic anhydrase 2 [Source:MGI Symbol;Acc:MGI:88269]
ENSMUSG00000020610	312.717	1.0403	0.162673	6.395	1.61E-10	6.11E-09	512.348	374.863	374.176	161.561	210.839	242.517	Amz2	archaelysin family metallopeptidase 2 [Source:MGI Symbol;Acc:MGI:104837]
ENSMUSG00000109336	338.445	1.04336	0.129686	8.04524	8.61E-16	5.08E-14	386.759	486.907	493.369	209.497	227.006	227.13	Samd4b	sterile alpha motif domain containing 4B [Source:MGI Symbol;Acc:MGI:2448542]
ENSMUSG00000041852	410.797	1.0444	0.123641	8.4471	2.99E-17	1.93E-15	566.58	474.458	620.106	287.023	274.832	241.784	Tcf20	transcription factor 20 [Source:MGI Symbol;Acc:MGI:108399]
ENSMUSG00000118646	192.346	1.04848	0.190003	5.51825	3.42E-08	8.95E-07	303.984	189.506	285.158	140.848	123.944	110.634	Gm56820	predicted gene, 56820 [Source:MGI Symbol;Acc:MGI:7337553]
ENSMUSG00000045176	59.778	1.05278	0.28821	3.65284	0.000259353	0.00319056	87.0563	71.9294	82.9826	39.0587	33.6804	43.9607	Borcs6	BLOC-1 related complex subunit 6 [Source:MGI Symbol;Acc:MGI:1919173]
ENSMUSG00000050860	513.229	1.05496	0.101848	10.3581	3.85E-25	3.83E-23	675.043	647.365	757.405	346.794	334.783	317.983	Phospho1	phosphatase, orphan 1 [Source:MGI Symbol;Acc:MGI:2447348]
ENSMUSG00000029766	282.955	1.05716	0.134023	7.88788	3.07E-15	1.76E-13	381.05	398.378	366.632	176.948	171.77	202.952	1700012A03Rik	RIKEN cDNA 1700012A03 gene [Source:MGI Symbol;Acc:MGI:1923632]
ENSMUSG00000070639	1757.94	1.05987	0.054828	19.3308	2.96E-83	1.88E-80	2286.3	2388.89	2453.27	1120.87	1170.73	1127.59	Lrrc8b	leucine rich repeat containing 8 family, member B [Source:MGI Symbol;Acc:MGI:2141353]
ENSMUSG00000041009	171.828	1.06073	0.187916	5.64471	1.65E-08	4.56E-07	286.858	189.506	220.281	101.789	113.84	118.694	Iqcf4	IQ motif containing F4 [Source:MGI Symbol;Acc:MGI:1914570]
ENSMUSG00000032352	280.598	1.06535	0.168082	6.33826	2.32E-10	8.53E-09	371.06	383.163	384.737	147.358	240.478	156.793	Lrrc1	leucine rich repeat containing 1 [Source:MGI Symbol;Acc:MGI:2442313]
ENSMUSG00000048668	59.8792	1.06668	0.365214	2.92071	0.00349232	0.0275846	99.9007	62.2466	81.4738	50.3029	48.4997	16.8516	Rhno1	RAD9-HUS1-RAD1 interacting nuclear orphan 1 [Source:MGI Symbol;Acc:MGI:1915315]
ENSMUSG00000052906	64.8956	1.07156	0.329901	3.24811	0.00116174	0.0113859	67.0762	123.11	73.9299	55.0373	43.1109	27.1091	Ubxn8	UBX domain protein 8 [Source:MGI Symbol;Acc:MGI:1337129]
ENSMUSG00000068328	74.373	1.07209	0.277851	3.8585	0.000114087	0.00157	84.202	105.128	113.158	54.4455	34.354	54.9509	Aup1	ancient ubiquitous protein 1 [Source:MGI Symbol;Acc:MGI:107789]
ENSMUSG00000030200	1315.02	1.08304	0.0791233	13.688	1.20E-42	2.15E-40	1962.34	1694.49	1704.91	940.369	782.058	805.947	Bcl2l14	BCL2 like 14 [Source:MGI Symbol;Acc:MGI:1914063]
ENSMUSG00000042700	66.7206	1.09138	0.273806	3.98595	6.72E-05	0.000995137	101.328	92.6783	78.4563	42.6095	47.1525	38.0993	Sipa1l1	signal-induced proliferation-associated 1 like 1 [Source:MGI Symbol;Acc:MGI:2443679]
ENSMUSG00000046957	2597.85	1.09177	0.0549223	19.8784	6.26E-88	4.31E-85	3847.6	3383.45	3378.15	1632.77	1732.52	1612.63	Spz1	spermatogenic leucine zipper 1 [Source:MGI Symbol;Acc:MGI:1930801]
ENSMUSG00000070424	95.9407	1.09478	0.252794	4.33072	1.49E-05	0.000255343	99.9007	134.176	158.421	66.8733	69.3815	46.8914	Art5	ADP-ribosyltransferase 5 [Source:MGI Symbol;Acc:MGI:107948]
ENSMUSG00000000125	67.2769	1.09493	0.378841	2.89022	0.00384971	0.0296794	154.133	45.6475	75.4387	51.4865	49.8469	27.1091	Wnt3	wingless-type MMTV integration site family, member 3 [Source:MGI Symbol;Acc:MGI:98955]
ENSMUSG00000046516	36.4346	1.09949	0.378309	2.90634	0.00365683	0.0284757	49.9504	52.5638	46.772	30.1818	21.5554	17.5843	Cox17	cytochrome c oxidase assembly protein 17, copper chaperone [Source:MGI Symbol;Acc:MGI:1333806]
ENSMUSG00000064345	142.918	1.10035	0.226643	4.855	1.20E-06	2.49E-05	125.589	210.255	248.948	84.6273	94.305	93.7829	mt-Nd2	mitochondrially encoded NADH dehydrogenase 2 [Source:MGI Symbol;Acc:MGI:102500]
ENSMUSG00000041642	239.28	1.10179	0.157044	7.0158	2.29E-12	9.89E-11	268.305	325.066	386.246	153.276	148.194	154.595	Kif21b	kinesin family member 21B [Source:MGI Symbol;Acc:MGI:109234]
ENSMUSG00000005131	37.4796	1.10947	0.399095	2.77996	0.00543649	0.0389222	62.7947	27.6652	63.3685	24.2638	26.2707	20.515	4930550C14Rik	RIKEN cDNA 4930550C14 gene [Source:MGI Symbol;Acc:MGI:1922561]
ENSMUSG00000022663	41.2819	1.10969	0.376502	2.94736	0.00320498	0.0257583	74.212	33.1982	61.8597	23.0802	28.9651	26.3764	Atg3	autophagy related 3 [Source:MGI Symbol;Acc:MGI:1915091]
ENSMUSG00000055850	184.479	1.11249	0.183991	6.04644	1.48E-09	4.72E-08	222.636	247.603	286.667	124.278	91.6106	134.08	Rnf181	ring finger protein 181 [Source:MGI Symbol;Acc:MGI:1913760]
ENSMUSG00000095789	407.883	1.11357	0.142861	7.79479	6.45E-15	3.51E-13	530.901	669.497	472.246	215.415	298.408	260.834	Nupr2	nuclear protein transcriptional regulator 2 [Source:MGI Symbol;Acc:MGI:1923099]
ENSMUSG00000038696	42.7153	1.11362	0.345751	3.22086	0.00127807	0.0123502	69.9305	53.9471	51.2983	23.0802	31.6595	26.3764	Mapkap1	mitogen-activated protein kinase associated protein 1 [Source:MGI Symbol;Acc:MGI:2444554]
ENSMUSG00000067274	159.31	1.11687	0.193481	5.77252	7.81E-09	2.24E-07	256.888	231.004	165.965	95.8715	105.756	100.377	Rplp0	ribosomal protein lateral stalk subunit P0 [Source:MGI Symbol;Acc:MGI:1927636]
ENSMUSG00000033917	210.667	1.12236	0.170702	6.575	4.87E-11	1.99E-09	325.391	305.7	235.369	152.092	125.291	120.159	Gde1	glycerophosphodiester phosphodiesterase 1 [Source:MGI Symbol;Acc:MGI:1891827]
ENSMUSG00000032185	118.463	1.13233	0.248225	4.5617	5.07E-06	9.53E-05	135.58	132.793	220.281	77.5257	88.9161	55.6836	Carm1	coactivator-associated arginine methyltransferase 1 [Source:MGI Symbol;Acc:MGI:1913208]
ENSMUSG00000047518	1275.13	1.13397	0.0706885	16.0418	6.52E-58	1.92E-55	1848.16	1601.81	1807.51	819.642	820.453	753.194	Slfnl1	schlafen like 1 [Source:MGI Symbol;Acc:MGI:3045330]
ENSMUSG00000033502	384.789	1.13957	0.155186	7.34326	2.08E-13	9.80E-12	592.269	554.687	440.562	205.354	308.512	207.348	Cdc14a	CDC14 cell division cycle 14A [Source:MGI Symbol;Acc:MGI:2442676]
ENSMUSG00000064370	451.003	1.14319	0.11337	10.0837	6.52E-24	6.12E-22	585.133	611.4	666.878	282.288	311.206	249.111	mt-Cytb	mitochondrially encoded cytochrome b [Source:MGI Symbol;Acc:MGI:102501]
ENSMUSG00000002409	1318.71	1.14581	0.0720617	15.9004	6.30E-57	1.80E-54	1851.02	1922.73	1673.23	755.136	851.439	858.699	Dyrk1b	dual-specificity tyrosine phosphorylation regulated kinase 1b [Source:MGI Symbol;Acc:MGI:1330302]
ENSMUSG00000044084	1042.57	1.14787	0.0737028	15.5744	1.09E-54	2.90E-52	1332.96	1536.8	1440.88	666.958	643.295	634.5	Spem2	SPEM family member 2 [Source:MGI Symbol;Acc:MGI:1918293]
ENSMUSG00000064061	40.5797	1.14991	0.361762	3.17864	0.00147969	0.0140036	55.659	58.0969	54.3159	29.59	28.9651	16.8516	Dzip3	DAZ interacting protein 3, zinc finger [Source:MGI Symbol;Acc:MGI:1917433]
ENSMUSG00000025171	205.998	1.15077	0.178798	6.43614	1.23E-10	4.76E-09	255.46	320.916	276.106	129.604	154.256	99.6443	Ubtd1	ubiquitin domain containing 1 [Source:MGI Symbol;Acc:MGI:2385092]
ENSMUSG00000071322	53.2019	1.15384	0.385774	2.99097	0.00278096	0.023122	91.3378	77.4625	51.2983	21.8966	55.2358	21.9804	Tcp10a	t-complex protein 10a [Source:MGI Symbol;Acc:MGI:98541]
ENSMUSG00000046886	140.831	1.16765	0.194807	5.99391	2.05E-09	6.36E-08	211.219	186.74	187.088	91.1371	96.9994	71.8025	Zfp474	zinc finger protein 474 [Source:MGI Symbol;Acc:MGI:1914008]
ENSMUSG00000031085	285.902	1.16872	0.142961	8.17509	2.96E-16	1.81E-14	378.196	427.427	381.72	192.927	146.846	188.298	Acte1	actin, epsilon 1 [Source:MGI Symbol;Acc:MGI:2685344]
ENSMUSG00000026473	470.996	1.17334	0.103571	11.3288	9.45E-30	1.15E-27	682.179	650.132	626.141	308.327	282.241	276.953	Glul	glutamate-ammonia ligase [Source:MGI Symbol;Acc:MGI:95739]
ENSMUSG00000023495	46.3093	1.17796	0.359088	3.28042	0.00103652	0.0104819	51.3775	89.9118	51.2983	25.4474	36.3748	23.4457	Pcbp4	poly(rC) binding protein 4 [Source:MGI Symbol;Acc:MGI:1890471]
ENSMUSG00000025508	34.211	1.1821	0.435224	2.71607	0.00660613	0.0455211	21.4073	62.2466	58.8422	19.5294	24.9235	18.317	Rplp2	ribosomal protein lateral stalk subunit P2 [Source:MGI Symbol;Acc:MGI:1914436]
ENSMUSG00000037979	729.629	1.1842	0.0825282	14.3491	1.08E-46	2.35E-44	1043.25	998.713	998.809	465.154	443.233	428.617	Ccdc92	coiled-coil domain containing 92 [Source:MGI Symbol;Acc:MGI:106485]
ENSMUSG00000050697	64.6913	1.18736	0.322276	3.68428	0.00022935	0.0028754	108.464	102.361	58.8422	36.6916	53.215	28.5745	Prkaa1	protein kinase, AMP-activated, alpha 1 catalytic subunit [Source:MGI Symbol;Acc:MGI:2145955]
ENSMUSG00000035342	76.9006	1.19922	0.26763	4.48089	7.43E-06	0.000134676	91.3378	105.128	125.228	55.0373	37.0484	47.6241	Lzts2	leucine zipper, putative tumor suppressor 2 [Source:MGI Symbol;Acc:MGI:2385095]
ENSMUSG00000067438	35.5596	1.20693	0.40712	2.96456	0.00303118	0.024625	58.5133	31.8149	58.8422	26.631	22.9026	14.6536	Hmx1	H6 homeobox 1 [Source:MGI Symbol;Acc:MGI:107178]
ENSMUSG00000033124	547.404	1.21232	0.0962987	12.5892	2.42E-36	4.00E-34	782.08	792.607	719.685	344.427	315.922	329.705	Atg9a	autophagy related 9A [Source:MGI Symbol;Acc:MGI:2138446]
ENSMUSG00000035504	3672.92	1.2246	0.0395132	30.9922	6.87E-211	5.68E-207	5096.36	5018.46	5319.94	2224.57	2167.67	2210.49	Reep6	receptor accessory protein 6 [Source:MGI Symbol;Acc:MGI:1917585]
ENSMUSG00000038256	36.8289	1.22483	0.397085	3.08455	0.00203863	0.0181865	34.2517	51.1806	69.4036	19.5294	28.2915	18.317	Bcl9	B cell CLL/lymphoma 9 [Source:MGI Symbol;Acc:MGI:1924828]
ENSMUSG00000033688	33.4497	1.22737	0.440826	2.78425	0.00536516	0.0385794	38.5331	38.7312	63.3685	13.0196	31.6595	15.3863	Inhca	inhibitor of carbonic anhydrase [Source:MGI Symbol;Acc:MGI:1919025]
ENSMUSG00000038518	39.7815	1.22798	0.382178	3.2131	0.00131309	0.0126148	72.7848	55.3303	39.2281	24.8556	29.6387	16.8516	Jarid2	jumonji and AT-rich interaction domain containing 2 [Source:MGI Symbol;Acc:MGI:104813]
ENSMUSG00000040390	135.844	1.23943	0.235054	5.27296	1.34E-07	3.30E-06	132.725	235.154	205.193	100.606	75.444	65.9411	Map3k10	mitogen-activated protein kinase kinase kinase 10 [Source:MGI Symbol;Acc:MGI:1346879]
ENSMUSG00000002221	51.363	1.24308	0.416696	2.98318	0.00285274	0.0234989	38.5331	120.343	57.3334	17.754	30.9859	43.228	Paxip1	PAX interacting (with transcription-activation domain) protein 1 [Source:MGI Symbol;Acc:MGI:1890430]
ENSMUSG00000025903	71.7884	1.25256	0.275868	4.54043	5.61E-06	0.000104231	104.182	118.96	79.965	41.4259	36.3748	49.8222	Lypla1	lysophospholipase 1 [Source:MGI Symbol;Acc:MGI:1344588]
ENSMUSG00000037972	58.0144	1.25281	0.338683	3.69905	0.000216409	0.00272973	64.2219	87.1453	93.544	20.1212	47.1525	35.9013	Snn	stannin [Source:MGI Symbol;Acc:MGI:1276549]
ENSMUSG00000028643	33.8924	1.25541	0.442564	2.83667	0.00455864	0.0340318	71.3577	41.4978	30.1755	11.836	23.5762	24.9111	Svbp	small vasohibin binding protein [Source:MGI Symbol;Acc:MGI:1916466]
ENSMUSG00000043866	38.5686	1.26249	0.461458	2.73587	0.00622149	0.0434505	54.2318	58.0969	51.2983	29.59	32.3331	5.86143	Taf10	TATA-box binding protein associated factor 10 [Source:MGI Symbol;Acc:MGI:1346320]
ENSMUSG00000064351	1391.87	1.2775	0.0630207	20.2712	2.31E-91	1.91E-88	1966.62	2034.77	1911.62	824.376	846.724	767.115	mt-Co1	mitochondrially encoded cytochrome c oxidase I [Source:MGI Symbol;Acc:MGI:102504]
ENSMUSG00000037541	33.2415	1.27784	0.398645	3.20546	0.00134848	0.0128949	55.659	40.1145	45.2632	14.2032	22.229	21.9804	Shank2	SH3 and multiple ankyrin repeat domains 2 [Source:MGI Symbol;Acc:MGI:2671987]
ENSMUSG00000020747	154.546	1.27821	0.214054	5.97143	2.35E-09	7.22E-08	245.47	219.938	191.614	98.2387	110.472	61.545	Tmem94	transmembrane protein 94 [Source:MGI Symbol;Acc:MGI:1919197]
ENSMUSG00000040600	30.208	1.28443	0.43126	2.97831	0.00289844	0.0237569	39.9603	41.4978	46.772	10.6524	18.1874	24.1784	Eps8l3	EPS8-like 3 [Source:MGI Symbol;Acc:MGI:2139743]
ENSMUSG00000067629	92.455	1.28869	0.260503	4.94692	7.54E-07	1.62E-05	129.871	96.8281	167.474	63.3225	52.5413	44.6934	Syngap1	synaptic Ras GTPase activating protein 1 homolog (rat) [Source:MGI Symbol;Acc:MGI:3039785]
ENSMUSG00000021738	39.4746	1.29662	0.351173	3.69226	0.00022227	0.00279939	58.5133	52.5638	57.3334	23.672	24.2499	20.515	Atxn7	ataxin 7 [Source:MGI Symbol;Acc:MGI:2179277]
ENSMUSG00000022722	27.7226	1.29702	0.456935	2.83853	0.00453219	0.0339496	48.5232	45.6475	24.1404	21.3048	12.7985	13.9209	Arl6	ADP-ribosylation factor-like 6 [Source:MGI Symbol;Acc:MGI:1927136]
ENSMUSG00000033389	61.1354	1.30028	0.401929	3.23511	0.00121595	0.011819	164.123	48.4141	48.2808	32.549	39.7428	33.7032	Arhgap44	Rho GTPase activating protein 44 [Source:MGI Symbol;Acc:MGI:2144423]
ENSMUSG00000021366	105.461	1.30206	0.299593	4.34609	1.39E-05	0.000239037	218.354	159.075	72.4212	57.4045	55.9094	69.6045	Hivep1	human immunodeficiency virus type I enhancer binding protein 1 [Source:MGI Symbol;Acc:MGI:96100]
ENSMUSG00000031486	36.4713	1.30537	0.400504	3.25932	0.00111678	0.0111301	65.649	35.9647	54.3159	26.0392	14.1457	22.713	Adgra2	adhesion G protein-coupled receptor A2 [Source:MGI Symbol;Acc:MGI:1925810]
ENSMUSG00000022439	35.2225	1.33807	0.416109	3.21567	0.00130139	0.0125433	42.8146	70.5462	37.7194	13.6114	19.5346	27.1091	Parvg	parvin, gamma [Source:MGI Symbol;Acc:MGI:2158329]
ENSMUSG00000039449	35.0913	1.33819	0.411733	3.25014	0.00115347	0.0113655	57.0861	62.2466	31.6843	26.631	17.5138	15.3863	Prpf18	pre-mRNA processing factor 18 [Source:MGI Symbol;Acc:MGI:1914479]
ENSMUSG00000074088	29.762	1.34477	0.457558	2.93901	0.0032926	0.0263855	57.0861	48.4141	22.6316	17.1622	21.5554	11.7229	Snrnp40	small nuclear ribonucleoprotein 40 (U5) [Source:MGI Symbol;Acc:MGI:1913835]
ENSMUSG00000034818	26.0548	1.35481	0.47996	2.82276	0.00476115	0.0350907	32.8245	40.1145	39.2281	7.10159	20.2082	16.8516	Celf5	CUGBP, Elav-like family member 5 [Source:MGI Symbol;Acc:MGI:2442333]
ENSMUSG00000022974	38.1677	1.359	0.469967	2.89169	0.00383171	0.0296142	89.9106	55.3303	19.6141	26.0392	24.9235	13.1882	Paxbp1	PAX3 and PAX7 binding protein 1 [Source:MGI Symbol;Acc:MGI:1914617]
ENSMUSG00000022445	31.3787	1.3669	0.41841	3.2669	0.00108731	0.0108921	34.2517	47.0308	54.3159	17.1622	12.7985	22.713	Cyp2d26	cytochrome P450, family 2, subfamily d, polypeptide 26 [Source:MGI Symbol;Acc:MGI:1923529]
ENSMUSG00000039046	22.7273	1.36968	0.483057	2.83543	0.00457635	0.0340323	38.5331	23.5154	36.2106	10.6524	12.7985	14.6536	Usp6nl	USP6 N-terminal like [Source:MGI Symbol;Acc:MGI:2138893]
ENSMUSG00000020864	60.3833	1.38141	0.352006	3.92441	8.69E-05	0.00124494	125.589	44.2643	92.0352	36.0998	26.9443	37.3666	Ankrd40	ankyrin repeat domain 40 [Source:MGI Symbol;Acc:MGI:1918702]
ENSMUSG00000024565	68.3949	1.38192	0.323167	4.27619	1.90E-05	0.000316686	125.589	113.427	57.3334	40.2423	27.6179	46.1588	Sall3	spalt like transcription factor 3 [Source:MGI Symbol;Acc:MGI:109295]
ENSMUSG00000037279	25.0183	1.38197	0.462064	2.99087	0.00278181	0.023122	41.3874	42.881	24.1404	13.0196	15.493	13.1882	Ovol2	ovo like zinc finger 2 [Source:MGI Symbol;Acc:MGI:1338039]
ENSMUSG00000007892	24.7045	1.38595	0.468603	2.95762	0.00310024	0.0250628	37.106	24.8987	45.2632	14.795	10.7777	15.3863	Rplp1	ribosomal protein lateral stalk subunit P1 [Source:MGI Symbol;Acc:MGI:1927099]
ENSMUSG00000003032	65.3112	1.38822	0.289265	4.79914	1.59E-06	3.23E-05	85.6292	98.2114	99.5791	28.9982	46.4789	32.9705	Klf4	Kruppel-like transcription factor 4 (gut) [Source:MGI Symbol;Acc:MGI:1342287]
ENSMUSG00000036241	67.5353	1.39063	0.287869	4.83077	1.36E-06	2.80E-05	104.182	80.229	108.632	28.4064	39.0692	44.6934	Ube2r2	ubiquitin-conjugating enzyme E2R 2 [Source:MGI Symbol;Acc:MGI:1914865]
ENSMUSG00000022707	44.8127	1.40425	0.353183	3.976	7.01E-05	0.001034	54.2318	80.229	60.351	17.754	26.2707	30.0398	Gbe1	1,4-alpha-glucan branching enzyme 1 [Source:MGI Symbol;Acc:MGI:1921435]
ENSMUSG00000026565	30.941	1.41952	0.468568	3.02948	0.00244972	0.0208871	74.212	27.6652	33.193	13.0196	22.9026	14.6536	Pou2f1	POU domain, class 2, transcription factor 1 [Source:MGI Symbol;Acc:MGI:101898]
ENSMUSG00000037386	113.249	1.43158	0.221506	6.46295	1.03E-10	4.02E-09	168.404	131.41	196.141	61.5471	62.6455	59.347	Rims2	regulating synaptic membrane exocytosis 2 [Source:MGI Symbol;Acc:MGI:2152972]
ENSMUSG00000028541	34.0498	1.43941	0.381794	3.77012	0.000163166	0.00212564	54.2318	51.1806	43.7545	17.1622	18.1874	19.7823	B4galt2	UDP-Gal:betaGlcNAc beta 1,4- galactosyltransferase, polypeptide 2 [Source:MGI Symbol;Acc:MGI:1858493]
ENSMUSG00000015605	26.9072	1.44229	0.538743	2.67714	0.00742532	0.0498359	68.5034	19.3656	30.1755	18.3458	6.73607	18.317	Srf	serum response factor [Source:MGI Symbol;Acc:MGI:106658]
ENSMUSG00000037432	53.1249	1.45376	0.358734	4.05248	5.07E-05	0.000771082	52.8047	82.9955	98.0703	33.7326	35.0276	16.1189	Fer1l5	fer-1 like family member 5 [Source:MGI Symbol;Acc:MGI:3616091]
ENSMUSG00000026925	52.75	1.4697	0.379344	3.87431	0.000106927	0.00148476	118.454	59.4801	54.3159	17.1622	37.0484	30.0398	Inpp5e	inositol polyphosphate-5-phosphatase E [Source:MGI Symbol;Acc:MGI:1927753]
ENSMUSG00000006356	82.0535	1.50249	0.272222	5.51934	3.40E-08	8.92E-07	118.454	128.643	116.176	31.3654	39.0692	58.6143	Crip2	cysteine rich protein 2 [Source:MGI Symbol;Acc:MGI:1915587]
ENSMUSG00000037989	41.6476	1.54808	0.422039	3.66809	0.000244369	0.00303149	31.3974	53.9471	101.088	26.0392	16.1666	21.2477	Wnk2	WNK lysine deficient protein kinase 2 [Source:MGI Symbol;Acc:MGI:1922857]
ENSMUSG00000087376	177.963	1.57863	0.188257	8.38551	5.05E-17	3.21E-15	241.189	266.969	292.702	111.85	78.1384	76.9313	Gm15517	predicted gene 15517 [Source:MGI Symbol;Acc:MGI:3782964]
ENSMUSG00000064368	132.669	1.60606	0.214611	7.4836	7.23E-14	3.58E-12	225.49	159.075	214.246	56.2209	63.3191	77.6639	mt-Nd6	mitochondrially encoded NADH dehydrogenase 6 [Source:MGI Symbol;Acc:MGI:102495]
ENSMUSG00000031970	22.5251	1.61343	0.558257	2.89012	0.00385092	0.0296794	29.9702	53.9471	18.1053	17.1622	10.1041	5.86143	Dbndd1	dysbindin domain containing 1 [Source:MGI Symbol;Acc:MGI:1919435]
ENSMUSG00000064363	110.928	1.63094	0.303763	5.3691	7.91E-08	2.01E-06	125.589	258.669	119.193	70.4241	57.2566	34.4359	mt-Nd4	mitochondrially encoded NADH dehydrogenase 4 [Source:MGI Symbol;Acc:MGI:102498]
ENSMUSG00000062944	21.8249	1.64861	0.613945	2.68528	0.0072469	0.0489166	9.99007	27.6652	61.8597	14.795	10.7777	5.86143	9130023H24Rik	RIKEN cDNA 9130023H24 gene [Source:MGI Symbol;Acc:MGI:2442738]
ENSMUSG00000040596	19.3135	1.64954	0.552708	2.98447	0.00284069	0.0234698	34.2517	24.8987	28.6667	5.91799	14.8194	7.32679	Pogk	pogo transposable element with KRAB domain [Source:MGI Symbol;Acc:MGI:1918842]
ENSMUSG00000048516	25.9926	1.68831	0.555303	3.04034	0.00236309	0.0202529	11.4172	59.4801	48.2808	15.9786	13.4721	7.32679	Adam26a	ADAM metallopeptidase domain 26A [Source:MGI Symbol;Acc:MGI:105985]
ENSMUSG00000027797	24.0552	1.71101	0.492712	3.47264	0.000515358	0.00580094	48.5232	31.8149	30.1755	12.4278	6.73607	14.6536	Dclk1	doublecortin-like kinase 1 [Source:MGI Symbol;Acc:MGI:1330861]
ENSMUSG00000040857	21.211	1.72297	0.617415	2.79061	0.00526084	0.0380272	39.9603	42.881	15.0877	18.9376	6.73607	3.66339	Erf	Ets2 repressor factor [Source:MGI Symbol;Acc:MGI:109637]
ENSMUSG00000018559	27.5482	1.7503	0.526654	3.32343	0.000889166	0.00922901	67.0762	35.9647	24.1404	5.32619	18.861	13.9209	Ctdnep1	CTD nuclear envelope phosphatase 1 [Source:MGI Symbol;Acc:MGI:1914431]
ENSMUSG00000103310	19.3669	1.78826	0.652231	2.74176	0.00611101	0.042825	25.6888	23.5154	40.7369	1.1836	14.8194	10.2575	Pcdha12	protocadherin alpha 12 [Source:MGI Symbol;Acc:MGI:1298370]
ENSMUSG00000018733	15.0759	1.78987	0.662143	2.70316	0.00686846	0.0468985	35.6788	20.7489	13.579	2.959	9.4305	8.05947	Pex12	peroxisomal biogenesis factor 12 [Source:MGI Symbol;Acc:MGI:2144177]
ENSMUSG00000020393	71.3266	1.805	0.298095	6.05511	1.40E-09	4.51E-08	129.871	109.277	93.544	26.631	44.4581	24.1784	Kremen1	kringle containing transmembrane protein 1 [Source:MGI Symbol;Acc:MGI:1933988]
ENSMUSG00000069833	41.6586	1.82407	0.437401	4.17025	3.04E-05	0.000487172	55.659	91.2951	48.2808	31.3654	9.4305	13.9209	Ahnak	AHNAK nucleoprotein [Source:MGI Symbol;Acc:MGI:1316648]
ENSMUSG00000042320	14.3115	1.86444	0.620067	3.00684	0.00263983	0.0220975	27.1159	22.1321	18.1053	5.91799	6.73607	5.86143	Prox2	prospero homeobox 2 [Source:MGI Symbol;Acc:MGI:1920672]
ENSMUSG00000092009	21.6932	1.86836	0.576268	3.24217	0.00118622	0.0115878	29.9702	16.5991	55.8246	11.2442	12.1249	4.39607	Myh15	myosin, heavy chain 15 [Source:MGI Symbol;Acc:MGI:3643515]
ENSMUSG00000121910	42.0185	1.87203	0.353941	5.2891	1.23E-07	3.05E-06	77.0663	63.6299	57.3334	17.754	20.2082	16.1189		novel protein
ENSMUSG00000045639	19.0455	1.8747	0.615657	3.04504	0.00232652	0.0200018	49.9504	9.68281	30.1755	8.87699	6.06246	9.52482	Zfp629	zinc finger protein 629 [Source:MGI Symbol;Acc:MGI:2444524]
ENSMUSG00000078794	21.2856	1.88069	0.630241	2.98408	0.00284435	0.0234766	45.6689	44.2643	10.5614	9.46879	14.8194	2.93071	Dact3	dishevelled-binding antagonist of beta-catenin 3 [Source:MGI Symbol;Acc:MGI:3654828]
ENSMUSG00000026095	48.9784	1.88527	0.340414	5.53816	3.06E-08	8.12E-07	95.6193	70.5462	64.8773	18.9376	17.5138	26.3764	Asnsd1	asparagine synthetase domain containing 1 [Source:MGI Symbol;Acc:MGI:1917646]
ENSMUSG00000074406	25.3176	1.89458	0.491595	3.85394	0.000116232	0.00158992	48.5232	47.0308	24.1404	13.0196	6.73607	12.4555	Zfp628	zinc finger protein 628 [Source:MGI Symbol;Acc:MGI:2665174]
ENSMUSG00000020100	14.5961	1.98701	0.66556	2.98547	0.00283144	0.0234231	25.6888	12.4493	31.6843	2.959	6.73607	8.05947	Slc29a3	solute carrier family 29 (nucleoside transporters), member 3 [Source:MGI Symbol;Acc:MGI:1918529]
ENSMUSG00000040824	20.5829	2.05044	0.632444	3.24209	0.00118655	0.0115878	21.4073	51.1806	27.1579	14.2032	8.08328	1.46536	Snrpd2	small nuclear ribonucleoprotein D2 [Source:MGI Symbol;Acc:MGI:98345]
ENSMUSG00000020577	14.9703	2.12295	0.703362	3.01829	0.00254203	0.0215192	7.13577	22.1321	43.7545	4.14259	6.06246	6.59411	Tspan13	tetraspanin 13 [Source:MGI Symbol;Acc:MGI:1913359]
ENSMUSG00000027405	14.1561	2.13411	0.678849	3.14371	0.00166819	0.0153995	14.2715	26.2819	28.6667	7.10159	2.02082	6.59411	Nop56	NOP56 ribonucleoprotein [Source:MGI Symbol;Acc:MGI:1914384]
ENSMUSG00000028487	13.1974	2.13855	0.793051	2.69661	0.00700499	0.0477125	19.9801	5.53303	39.2281	8.87699	3.36804	2.19804	Bnc2	basonuclin zinc finger protein 2 [Source:MGI Symbol;Acc:MGI:2443805]
ENSMUSG00000074500	24.5639	2.1619	0.475146	4.54996	5.37E-06	0.000100174	47.0961	38.7312	34.7018	10.6524	7.40968	8.79214	Zfp558	zinc finger protein 558 [Source:MGI Symbol;Acc:MGI:1921681]
ENSMUSG00000036023	13.3846	2.17234	0.810576	2.68	0.00736221	0.049533	28.5431	24.8987	12.0702	0	6.73607	8.05947	Parp2	poly (ADP-ribose) polymerase family, member 2 [Source:MGI Symbol;Acc:MGI:1341112]
ENSMUSG00000032615	12.3546	2.21764	0.705217	3.14462	0.00166301	0.0153861	19.9801	12.4493	28.6667	5.32619	4.04164	3.66339	Nt5m	5',3'-nucleotidase, mitochondrial [Source:MGI Symbol;Acc:MGI:1917127]
ENSMUSG00000053825	15.593	2.2441	0.65024	3.45118	0.000558142	0.00623158	22.8345	13.8326	40.7369	7.10159	5.38886	3.66339	Ppfia2	protein tyrosine phosphatase, receptor type, f polypeptide (PTPRF), interacting protein (liprin), alpha 2 [Source:MGI Symbol;Acc:MGI:2443834]
ENSMUSG00000029428	25.6221	2.30786	0.561733	4.10847	3.98E-05	0.000627997	55.659	55.3303	16.5965	4.14259	8.08328	13.9209	Stx2	syntaxin 2 [Source:MGI Symbol;Acc:MGI:108059]
ENSMUSG00000052949	16.6672	2.31799	0.693813	3.34094	0.000834948	0.00879903	34.2517	42.881	6.0351	4.73439	4.04164	8.05947	Rnf157	ring finger protein 157 [Source:MGI Symbol;Acc:MGI:2442484]
ENSMUSG00000021709	18.4633	2.32267	0.661743	3.50992	0.000448234	0.00516501	41.3874	37.348	13.579	4.14259	12.1249	2.19804	Erbin	Erbb2 interacting protein [Source:MGI Symbol;Acc:MGI:1890169]
ENSMUSG00000016346	11.2982	2.3305	0.813462	2.86492	0.00417115	0.0317915	25.6888	26.2819	4.52632	4.14259	2.02082	5.12875	Kcnq2	potassium voltage-gated channel, subfamily Q, member 2 [Source:MGI Symbol;Acc:MGI:1309503]
ENSMUSG00000029053	9.58311	2.66125	0.854712	3.11362	0.00184808	0.0167974	14.2715	8.29955	27.1579	3.5508	2.02082	2.19804	Prkcz	protein kinase C, zeta [Source:MGI Symbol;Acc:MGI:97602]
ENSMUSG00000007617	11.0041	2.69354	0.840923	3.20308	0.00135966	0.0129868	25.6888	16.5991	15.0877	6.50979	0.673607	1.46536	Homer1	homer scaffolding protein 1 [Source:MGI Symbol;Acc:MGI:1347345]
ENSMUSG00000026851	17.3224	2.81713	0.628301	4.48373	7.34E-06	0.000133779	32.8245	26.2819	31.6843	1.7754	4.04164	7.32679	BC005624	cDNA sequence BC005624 [Source:MGI Symbol;Acc:MGI:2385132]
ENSMUSG00000029524	10.6665	3.25511	0.942794	3.45262	0.000555176	0.00620685	25.6888	11.0661	21.1228	0	5.38886	0.732679	Sirt4	sirtuin 4 [Source:MGI Symbol;Acc:MGI:1922637]
