# Supplementary material for: Targeted mRNP-phagy licenses translational activation during cellular metamorphosis
Source: Research Square preprint supplement (doi:10.21203/rs.3.rs-6289188/v1), 2025-05-06
Supplement: Supplementary file 3 [file 4cc85918b6b0cadefba63d53.xlsx]

## Sheet: WT-ES-RS
ensembl_gene_id	baseMean	log2FoldChange	lfcSE	stat	pvalue	padj	HE1	HE2	HE3	HR1	HR2	HR3	external_gene_name	description
ENSMUSG00000038264	32.8418508162818	9.63411776958607	1.26806671492584	7.59748494001716	3.0194134437302e-14	2.57208527395017e-13	77.6299100693269	57.3498939277246	62.0713009006395	0	0	0	Sema7a	sema domain, immunoglobulin domain (Ig), and GPI membrane anchor, (semaphorin) 7A [Source:MGI Symbol;Acc:MGI:1306826]
ENSMUSG00000027463	28.168013711759	9.41188381555518	1.31427766281146	7.16125981736737	7.99389754628724e-13	6.30038680501739e-12	91.930156661045	25.7085731400145	51.3693524694947	0	0	0	Slc52a3	solute carrier protein family 52, member 3 [Source:MGI Symbol;Acc:MGI:1916948]
ENSMUSG00000027797	26.2917554908762	9.3136801604067	1.29672861057783	7.18244363888635	6.8476294011529e-13	5.41411105290137e-12	69.4583405883451	45.4843986323333	42.8077937245789	0	0	0	Dclk1	doublecortin-like kinase 1 [Source:MGI Symbol;Acc:MGI:1330861]
ENSMUSG00000031255	21.282489296783	9.00749332613412	1.33148965145732	6.7649743400374	1.33332827873364e-11	9.72586733290929e-11	57.2009863668724	27.6861556892464	42.8077937245789	0	0	0	Sytl4	synaptotagmin-like 4 [Source:MGI Symbol;Acc:MGI:1351606]
ENSMUSG00000028246	20.657020178805	8.96176563887941	1.41847503636792	6.31788745597279	2.65162999834807e-10	1.77302808007822e-09	38.8149550346634	5.93274764769565	79.194418390471	0	0	0	Faxc	failed axon connections homolog [Source:MGI Symbol;Acc:MGI:1923382]
ENSMUSG00000038074	19.2124624037047	8.85995163698225	1.34149229892726	6.60454901162477	3.9872928516228e-11	2.81441323471241e-10	44.9436321453998	29.6637382384782	40.6674	0	0	0	Fkbp14	FK506 binding protein 14 [Source:MGI Symbol;Acc:MGI:2387639]
ENSMUSG00000062124	17.2077453316399	8.70034655057489	1.37375078398253	6.3332786790865	2.40005492072878e-10	1.60826956083533e-09	44.9436321453998	19.7758254923188	38.527014352121	0	0	0	Defb45	defensin beta 45 [Source:MGI Symbol;Acc:MGI:3650541]
ENSMUSG00000002602	17.0178	8.68682452507734	1.36999788376081	6.34075762309276	2.28637998666856e-10	1.53457678867765e-09	44.9436321453998	33.618903336942	23.5442865485184	0	0	0	Axl	AXL receptor tyrosine kinase [Source:MGI Symbol;Acc:MGI:1347244]
ENSMUSG00000079608	16.4829297171912	8.63876088393281	1.40406040989514	6.15269886042722	7.61753640767248e-10	4.94206052698083e-09	12.2573542214727	39.5516509846377	47.0885730970368	0	0	0	Stard6	StAR related lipid transfer domain containing 6 [Source:MGI Symbol;Acc:MGI:2156774]
ENSMUSG00000118332	16.1261981028197	8.6073556323203	1.40735291390698	6.11598949152368	9.59596489146532e-10	6.18367955208053e-09	12.2573542214727	39.5516509846377	44.9481834108079	0	0	0	Fam220a	family with sequence similarity 220, member A [Source:MGI Symbol;Acc:MGI:1914488]
ENSMUSG00000068299	14.3101967308134	8.43654351430806	1.40264599944727	6.01473466407958	1.80181581085689e-09	1.1392569008453e-08	26.5576008131908	33.618903336942	25.6846762347474	0	0	0	Nat8f4	N-acetyltransferase 8 (GCN5-related) family member 4 [Source:MGI Symbol;Acc:MGI:1922791]
ENSMUSG00000068762	13.1259434086936	8.31423461261336	1.45935	5.69720536603675	1.21787195509761e-08	7.15816328239555e-08	20.4289237024544	45.4843986323333	12.8423381173737	0	0	0	Gstm6	glutathione S-transferase, mu 6 [Source:MGI Symbol;Acc:MGI:1309467]
ENSMUSG00000004451	12.9758704223527	8.29485488430995	1.47319870006648	5.63050651886649	1.79681149354086e-08	1.04133012792021e-07	49.0294168858907	13.8430778446232	14.9827278036026	0	0	0	Ralb	v-ral simian leukemia viral oncogene B [Source:MGI Symbol;Acc:MGI:1927244]
ENSMUSG00000022791	12.9700384243209	8.29426667165943	1.4287	5.8054575981897	6.41904484429236e-09	3.86790991901473e-08	22.4718160726999	29.6637382384782	25.6846762347474	0	0	0	Tnk2	tyrosine kinase, non-receptor, 2 [Source:MGI Symbol;Acc:MGI:1858308]
ENSMUSG00000030762	12.6516379133091	8.25808093478125	1.47049609299675	5.61584690643547	1.95601792073129e-08	1.13254166108636e-07	44.9436321453998	13.8430778446232	17.1231174898316	0	0	0	Aqp8	aquaporin 8 [Source:MGI Symbol;Acc:MGI:1195271]
ENSMUSG00000020092	12.6025776449594	8.25328625603264	1.43998382253671	5.73151317873382	9.95386135369952e-09	5.91194716599622e-08	30.6433855536817	25.7085731400145	19.2635071760605	0	0	0	Pald1	phosphatase domain containing, paladin 1 [Source:MGI Symbol;Acc:MGI:1351623]
ENSMUSG00000031342	12.1698070445844	8.20438221257333	1.46519707424819	5.59950764082918	2.14961459208489e-08	1.24001654368088e-07	26.5576008131908	33.618903336942	12.8423381173737	0	0	0	Gpm6b	glycoprotein m6b [Source:MGI Symbol;Acc:MGI:107672]
ENSMUSG00000037606	12.0140578653907	8.18269617811448	1.47900921334062	5.53255253875826	3.15603864134349e-08	1.79888416967869e-07	38.8149550346634	11.8654952953913	21.4038968622895	0	0	0	Osbpl5	oxysterol binding protein-like 5 [Source:MGI Symbol;Acc:MGI:1930265]
ENSMUSG00000029053	11.8035722249945	8.15488938094965	1.48450737380511	5.49333032954019	3.94424039754131e-08	2.22671438148984e-07	20.4289237024544	11.8654952953913	38.527014352121	0	0	0	Prkcz	protein kinase C, zeta [Source:MGI Symbol;Acc:MGI:97602]
ENSMUSG00000035112	11.6246713405124	8.13593763807886	1.47025881341966	5.53367717562295	3.13585906265122e-08	1.78902197991712e-07	32.6862779239271	17.7982429430869	19.2635071760605	0	0	0	Wnk4	WNK lysine deficient protein kinase 4 [Source:MGI Symbol;Acc:MGI:1917097]
ENSMUSG00000060967	11.5011096562887	8.11692979549066	1.51347675429316	5.36310172750654	8.18049040734311e-08	4.49782312980222e-07	20.4289237024544	7.91033019692753	40.6674	0	0	0	Etd	embryonic testis differentiation [Source:MGI Symbol;Acc:MGI:1916751]
ENSMUSG00000027444	10.8621478434198	8.03953199752102	1.49087794525506	5.39248167370643	6.94911888215433e-08	3.84287201144302e-07	18.386031332209	29.6637382384782	17.1231174898316	0	0	0	Cstdc1	cystatin domain containing 1 [Source:MGI Symbol;Acc:MGI:1925859]
ENSMUSG00000042631	10.6694493258169	8.01151782801873	3.91530355436826	2.04620605191144	0.0407361021735917	0.0920317716136168	4.08578474049089	0	59.9309112144105	0	0	0	Xkr7	X-linked Kx blood group related 7 [Source:MGI Symbol;Acc:MGI:3526711]
ENSMUSG00000046070	10.6358800658965	8.00699730579425	1.51179618917107	5.29634706261864	1.18142197754163e-07	6.41070904654679e-07	32.6862779239271	11.8654952953913	19.2635071760605	0	0	0	Igfals	insulin-like growth factor binding protein, acid labile subunit [Source:MGI Symbol;Acc:MGI:107973]
ENSMUSG00000052305	10.5434357220501	7.99617195831145	1.49656625157604	5.34301234568845	9.14145347495385e-08	5.01288610529105e-07	20.4289237024544	25.7085731400145	17.1231174898316	0	0	0	Hbb-bs	hemoglobin, beta adult s chain [Source:MGI Symbol;Acc:MGI:5474852]
ENSMUSG00000025189	10.4457826008876	7.98446869837317	1.52944082217858	5.22051496376294	1.78426288788581e-07	9.53626022201799e-07	22.4718160726999	31.6413207877101	8.56155874491579	0	0	0	Cnnm1	cyclin M1 [Source:MGI Symbol;Acc:MGI:1891366]
ENSMUSG00000057897	10.2195148233643	7.95079994276708	1.54255772598058	5.15429653545892	2.54584809154431e-07	1.34734947721432e-06	36.772062664418	13.8430778446232	10.7019484311447	0	0	0	Camk2b	calcium/calmodulin-dependent protein kinase II, beta [Source:MGI Symbol;Acc:MGI:88257]
ENSMUSG00000051727	10.1647783621618	7.94387347817087	1.56134786497476	5.0878306214607	3.62182617027771e-07	1.89661692967343e-06	6.12867711073633	35.5964858861739	19.2635071760605	0	0	0	Kctd14	potassium channel tetramerisation domain containing 14 [Source:MGI Symbol;Acc:MGI:1289222]
ENSMUSG00000025270	10.1499105744483	7.93639550805277	1.60828976832047	4.93468009582672	8.02822368969628e-07	4.06543233016094e-06	4.08578474049089	11.8654952953913	44.9481834108079	0	0	0	Alas2	aminolevulinic acid synthase 2, erythroid [Source:MGI Symbol;Acc:MGI:87990]
ENSMUSG00000003555	9.86278320899283	7.89982413671896	1.56475445086249	5.04860307785964	4.45052321002531e-07	2.31111303394926e-06	36.772062664418	13.8430778446232	8.56155874491579	0	0	0	Cyp17a1	cytochrome P450, family 17, subfamily a, polypeptide 1 [Source:MGI Symbol;Acc:MGI:88586]
ENSMUSG00000093674	9.82966088294921	7.89392807701581	3.80186208976646	2.07633204220217	0.0378632517487046	0.0864680980533673	0	37.5740684354058	21.4038968622895	0	0	0	Rpl41	ribosomal protein L41 [Source:MGI Symbol;Acc:MGI:1915195]
ENSMUSG00000015112	9.70502904413286	7.87923613138167	1.59261632509382	4.94735361382001	7.52292393579098e-07	3.82200183780361e-06	12.2573542214727	39.5516509846377	6.42116905868684	0	0	0	Slc25a13	solute carrier family 25 (mitochondrial carrier, adenine nucleotide translocator), member 13 [Source:MGI Symbol;Acc:MGI:1354721]
ENSMUSG00000000567	9.52766572978024	7.84989003723186	1.55567993712441	5.04595440868253	4.51263012984525e-07	2.34238651606366e-06	30.6433855536817	15.8206603938551	10.7019484311447	0	0	0	Sox9	SRY (sex determining region Y)-box 9 [Source:MGI Symbol;Acc:MGI:98371]
ENSMUSG00000051243	9.46787629644062	7.84201119698427	1.55899528846362	5.03016991456883	4.9004536145025e-07	2.53945590014865e-06	24.5147084429453	23.7309905907826	8.56155874491579	0	0	0	Islr2	immunoglobulin superfamily containing leucine-rich repeat 2 [Source:MGI Symbol;Acc:MGI:2444277]
ENSMUSG00000061311	9.42019779304145	7.82899939245518	1.60529777917478	4.87697640526219	1.07724315150117e-06	5.39358819453302e-06	6.12867711073633	11.8654952953913	38.527014352121	0	0	0	Rag1	recombination activating 1 [Source:MGI Symbol;Acc:MGI:97848]
ENSMUSG00000062762	9.15973753488193	7.79352310199097	1.57980862755716	4.93320707713948	8.08903164203058e-07	4.09455785640758e-06	8.17156948098178	29.6637382384782	17.1231174898316	0	0	0	Ei24	etoposide induced 2.4 mRNA [Source:MGI Symbol;Acc:MGI:108090]
ENSMUSG00000027452	9.05258120850103	7.77201224580968	1.63284785054389	4.75978961739815	1.9379485721151e-06	9.46671892827787e-06	4.08578474049089	13.8430778446232	36.3866246658921	0	0	0	Acss1	acyl-CoA synthetase short-chain family member 1 [Source:MGI Symbol;Acc:MGI:1915988]
ENSMUSG00000042429	9.01487332585715	7.76653127723709	1.59640000783063	4.86502833822403	1.14440409236203e-06	5.71604566132795e-06	22.4718160726999	5.93274764769565	25.6846762347474	0	0	0	Adora1	adenosine A1 receptor [Source:MGI Symbol;Acc:MGI:99401]
ENSMUSG00000029468	8.96044847501252	7.75873774485309	1.56860421513613	4.94626858068195	7.5649565548972e-07	3.84178704259928e-06	12.2573542214727	15.8206603938551	25.6846762347474	0	0	0	P2rx7	purinergic receptor P2X, ligand-gated ion channel, 7 [Source:MGI Symbol;Acc:MGI:1339957]
ENSMUSG00000024600	8.64571917118731	7.70915667654645	3.79869906761265	2.02942021448184	0.042415507901346	0.0949507849669285	14.3002465917181	37.5740684354058	0	0	0	0	Slc27a6	solute carrier family 27 (fatty acid transporter), member 6 [Source:MGI Symbol;Acc:MGI:3036230]
ENSMUSG00000028194	8.62533099579993	7.70364702248193	1.61477361914735	4.77072880751525	1.83560540781637e-06	8.97735920448769e-06	6.12867711073633	17.7982429430869	27.8250659209763	0	0	0	Ddah1	dimethylarginine dimethylaminohydrolase 1 [Source:MGI Symbol;Acc:MGI:1916469]
ENSMUSG00000024176	8.51158412715251	7.68707666674551	1.58306328992154	4.85582396843179	1.19887170266533e-06	5.96653355984341e-06	20.4289237024544	17.7982429430869	12.8423381173737	0	0	0	Sox8	SRY (sex determining region Y)-box 8 [Source:MGI Symbol;Acc:MGI:98370]
ENSMUSG00000026494	8.35398576747149	7.6629661054438	1.67769974014992	4.56754	4.93473904003316e-06	2.31241558686692e-05	6.12867711073633	37.5740684354058	6.42116905868684	0	0	0	Kif26b	kinesin family member 26B [Source:MGI Symbol;Acc:MGI:2447076]
ENSMUSG00000031700	8.31781545495703	7.65261441460359	3.74734786214564	2.04214145473591	0.04113750183379	0.0927196647892073	30.6433855536817	0	19.2635071760605	0	0	0	Gpt2	glutamic pyruvate transaminase (alanine aminotransferase) 2 [Source:MGI Symbol;Acc:MGI:1915391]
ENSMUSG00000044863	44.6030053984414	7.61783646513022	0.938849941163545	8.11400856636281	4.89766856256109e-16	4.52879582993102e-15	100.101726142027	114.699787855449	51.3693524694947	0	0	1.44716592367787	Defb36	defensin beta 36 [Source:MGI Symbol;Acc:MGI:2385956]
ENSMUSG00000026832	7.90113860206697	7.57788941014181	1.61569357015179	4.69017736415816	2.72968330053062e-06	1.3138185452283e-05	14.3002465917181	13.8430778446232	19.2635071760605	0	0	0	Cytip	cytohesin 1 interacting protein [Source:MGI Symbol;Acc:MGI:2183535]
ENSMUSG00000048285	7.90113860206697	7.57788941014181	1.61569357015179	4.69017736415816	2.72968330053062e-06	1.3138185452283e-05	14.3002465917181	13.8430778446232	19.2635071760605	0	0	0	Frmd6	FERM domain containing 6 [Source:MGI Symbol;Acc:MGI:2442579]
ENSMUSG00000024818	7.62596636137296	7.52553327088332	1.72421191762935	4.36462200147085	1.27342763916219e-05	5.70725028766132e-05	24.5147084429453	1.97758254923188	19.2635071760605	0	0	0	Slc25a45	solute carrier family 25, member 45 [Source:MGI Symbol;Acc:MGI:2147731]
ENSMUSG00000037499	7.5117520771887	7.50614498539404	1.65478298646277	4.53602982795891	5.73230764524365e-06	2.67113938493425e-05	8.17156948098178	19.7758254923188	17.1231174898316	0	0	0	Nenf	neuron derived neurotrophic factor [Source:MGI Symbol;Acc:MGI:1913458]
ENSMUSG00000042978	7.46285	7.49781524653861	1.69935476175016	4.41215419834798	1.02347177960533e-05	4.6455907018071e-05	4.08578474049089	25.7085731400145	14.9827278036026	0	0	0	Sbk1	SH3-binding kinase 1 [Source:MGI Symbol;Acc:MGI:2135937]
ENSMUSG00000044317	7.42636569114565	7.48864175623851	3.8884234545919	1.92588123276416	0.0541192053051593	0.116591123571846	8.17156948098178	0	36.3866246658921	0	0	0	Gpr4	G protein-coupled receptor 4 [Source:MGI Symbol;Acc:MGI:2441992]
ENSMUSG00000031373	7.21496570133578	7.44695210345877	1.69741374629737	4.38723447344708	1.14801011356217e-05	5.17499158476719e-05	24.5147084429453	5.93274764769565	12.8423381173737	0	0	0	Car5b	carbonic anhydrase 5b, mitochondrial [Source:MGI Symbol;Acc:MGI:1926249]
ENSMUSG00000054008	7.20944531366184	7.44590285260463	1.66710774999291	4.46635968948996	7.95618010343268e-06	3.65132885411041e-05	18.386031332209	9.88791274615941	14.9827278036026	0	0	0	Ndst1	N-deacetylase/N-sulfotransferase (heparan glucosaminyl) 1 [Source:MGI Symbol;Acc:MGI:104719]
ENSMUSG00000030257	7.12283296784726	7.43053522657415	1.78512843728791	4.16246532818845	3.14829957141676e-05	0.000133864621434907	32.6862779239271	7.91033019692753	2.14038968622895	0	0	0	Srgap3	SLIT-ROBO Rho GTPase activating protein 3 [Source:MGI Symbol;Acc:MGI:2152938]
ENSMUSG00000068196	6.93963765546282	7.39118796908108	3.67458901018171	2.01143255711081	0.0442797873591086	0.0984461414703672	24.5147084429453	0	17.1231174898316	0	0	0	Col8a1	collagen, type VIII, alpha 1 [Source:MGI Symbol;Acc:MGI:88463]
ENSMUSG00000041836	6.8309437589525	7.36906675215226	1.68831278051574	4.36475209877945	1.27267002798101e-05	5.70591100865168e-05	14.3002465917181	13.8430778446232	12.8423381173737	0	0	0	Ptpre	protein tyrosine phosphatase receptor type E [Source:MGI Symbol;Acc:MGI:97813]
ENSMUSG00000029090	6.72777025011611	7.34979437798222	1.73355576640609	4.23972191746643	2.23796852866106e-05	9.73203307376138e-05	10.2144618512272	23.7309905907826	6.42116905868684	0	0	0	Adgra3	adhesion G protein-coupled receptor A3 [Source:MGI Symbol;Acc:MGI:1917943]
ENSMUSG00000027339	6.72761444493716	7.34714947365967	3.74416098329002	1.96229529297741	0.049728114910518	0.108866144189775	0	29.6637382384782	10.7019484311447	0	0	0	Rassf2	Ras association (RalGDS/AF-6) domain family member 2 [Source:MGI Symbol;Acc:MGI:2442060]
ENSMUSG00000008843	6.6206139237352	7.32044008470861	1.7561552025483	4.16844711337936	3.06681898595319e-05	0.00013071291202296	6.12867711073633	7.91033019692753	25.6846762347474	0	0	0	Cldn13	claudin 13 [Source:MGI Symbol;Acc:MGI:1913102]
ENSMUSG00000007039	6.60452017625023	7.31759579206575	1.79238556232886	4.08260139216807	4.4534371720418e-05	0.000185863752042563	18.386031332209	1.97758254923188	19.2635071760605	0	0	0	Ddah2	DDAH family member 2, ADMA independent [Source:MGI Symbol;Acc:MGI:1859016]
ENSMUSG00000039904	6.58827062358632	7.31445005325563	1.79426632814013	4.07656875600933	4.57051451102951e-05	0.000190430448823029	20.4289237024544	1.97758254923188	17.1231174898316	0	0	0	Gpr37	G protein-coupled receptor 37 [Source:MGI Symbol;Acc:MGI:1313297]
ENSMUSG00000024867	6.58259443073343	7.31312268204185	1.76323044398223	4.14757056118273	3.36021925122996e-05	0.000142388575221625	4.08578474049089	11.8654952953913	23.5442865485184	0	0	0	Pip5k1b	phosphatidylinositol-4-phosphate 5-kinase, type 1 beta [Source:MGI Symbol;Acc:MGI:107930]
ENSMUSG00000035011	6.47973253225494	7.2932196716563	1.73753912414158	4.19744198580822	2.6994677823725e-05	0.000115849830260065	20.4289237024544	9.88791274615941	8.56155874491579	0	0	0	Zbtb7a	zinc finger and BTB domain containing 7a [Source:MGI Symbol;Acc:MGI:1335091]
ENSMUSG00000051669	6.47405633940206	7.29198440826272	1.76434934539282	4.13295951128046	3.58121832042198e-05	0.000151392291811992	4.08578474049089	19.7758254923188	14.9827278036026	0	0	0	AU021092	expressed sequence AU021092 [Source:MGI Symbol;Acc:MGI:2146559]
ENSMUSG00000096606	6.41994309891532	7.28149936747851	1.74479612008144	4.17326659755448	3.0026324524078e-05	0.000128196841093703	14.3002465917181	17.7982429430869	6.42116905868684	0	0	0	Tpbgl	trophoblast glycoprotein-like [Source:MGI Symbol;Acc:MGI:3646425]
ENSMUSG00000073755	6.34374830773283	7.26256230224779	3.85921421048631	1.88187592243878	0.0598528642826621	0.126231994757244	0	31.6413207877101	6.42116905868684	0	0	0	5730409E04Rik	RIKEN cDNA 5730409E04Rik gene [Source:MGI Symbol;Acc:MGI:3609248]
ENSMUSG00000009734	12.2880688392782	7.24651284697096	1.44567632193599	5.01254169900684	5.37157298613062e-07	2.77896228071991e-06	18.386031332209	35.5964858861739	19.2635071760605	0	0	0.482388641225955	Pou6f2	POU domain, class 6, transcription factor 2 [Source:MGI Symbol;Acc:MGI:2443631]
ENSMUSG00000085795	6.25836192168978	7.24200043839219	3.67321310165209	1.97157100281903	0.0486586001336238	0.106769056080078	0	11.8654952953913	25.6846762347474	0	0	0	Zfp703	zinc finger protein 703 [Source:MGI Symbol;Acc:MGI:2662729]
ENSMUSG00000094690	6.19888409870804	7.22746607340534	1.75411291567562	4.12029693688311	3.78384427522794e-05	0.000159470251613046	14.3002465917181	7.91033019692753	14.9827278036026	0	0	0	1600014C23Rik	RIKEN cDNA 1600014C23 gene [Source:MGI Symbol;Acc:MGI:1919490]
ENSMUSG00000058794	6.16102041088522	7.21981593778864	1.7883447873899	4.03714987663314	5.41045056587831e-05	0.000222887624007382	22.4718160726999	5.93274764769565	8.56155874491579	0	0	0	Nfe2	nuclear factor, erythroid derived 2 [Source:MGI Symbol;Acc:MGI:97308]
ENSMUSG00000118646	186.364075375899	7.1862672154091	0.411544435465191	17.4617042441263	2.80435644942752e-68	8.14455536628361e-67	435.13607486228	270.928809244768	404.533650697271	2.5132022223882	3.14316066378538	1.92955456490382	Gm56820	predicted gene, 56820 [Source:MGI Symbol;Acc:MGI:7337553]
ENSMUSG00000022674	6.00894243887814	7.18450981526966	3.59617814677685	1.99781810634407	0.0457363836172665	0.101178122207034	14.3002465917181	21.7534080415507	0	0	0	0	Ube2v2	ubiquitin-conjugating enzyme E2 variant 2 [Source:MGI Symbol;Acc:MGI:1917870]
ENSMUSG00000024896	5.88001617215938	7.15051951179907	1.80371137237621	3.96433687856554	7.36002542240369e-05	0.000296715190205623	6.12867711073633	9.88791274615941	19.2635071760605	0	0	0	Minpp1	multiple inositol polyphosphate histidine phosphatase 1 [Source:MGI Symbol;Acc:MGI:1336159]
ENSMUSG00000001076	5.84215248433655	7.14235997124593	1.78862328273671	3.99321648117969	6.51830068812257e-05	0.000264841900222739	14.3002465917181	7.91033019692753	12.8423381173737	0	0	0	C1ql4	complement component 1, q subcomponent-like 4 [Source:MGI Symbol;Acc:MGI:3579909]
ENSMUSG00000038991	5.80949757382977	7.13525390681771	1.79081271591725	3.98436634015246	6.76604264495304e-05	0.000274101864414596	8.17156948098178	13.8430778446232	12.8423381173737	0	0	0	Txndc5	thioredoxin domain containing 5 [Source:MGI Symbol;Acc:MGI:2145316]
ENSMUSG00000040289	5.79324802116586	7.13174443851645	1.78857159094665	3.98739668829347	6.68022783542767e-05	0.000270890099736596	10.2144618512272	13.8430778446232	10.7019484311447	0	0	0	Hey1	hairy/enhancer-of-split related with YRPW motif 1 [Source:MGI Symbol;Acc:MGI:1341800]
ENSMUSG00000036832	5.78819504902876	7.12990711206506	3.92248248009958	1.8177027299008	0.0691095802882811	0.14228039232666	34.7291702941726	0	0	0	0	0	Lpar3	lysophosphatidic acid receptor 3 [Source:MGI Symbol;Acc:MGI:1929469]
ENSMUSG00000031861	5.76074891583802	7.12465664848993	1.80488191588358	3.94743644212427	7.89924790456045e-05	0.000317014992542815	14.3002465917181	13.8430778446232	6.42116905868684	0	0	0	Lpar2	lysophosphatidic acid receptor 2 [Source:MGI Symbol;Acc:MGI:1858422]
ENSMUSG00000026941	5.62645806662427	7.08533665168457	2.01417551846295	3.5177354638346	0.000435246015885066	0.0015676671588655	10.2144618512272	0	23.5442865485184	0	0	0	Mamdc4	MAM domain containing 4 [Source:MGI Symbol;Acc:MGI:2685841]
ENSMUSG00000020490	5.52880494546182	7.06187289643767	1.83363321999643	3.85130069603092	0.000117492128194533	0.000460381095890173	12.2573542214727	5.93274764769565	14.9827278036026	0	0	0	Btnl10	butyrophilin-like 10 [Source:MGI Symbol;Acc:MGI:2182073]
ENSMUSG00000020829	5.48021209264902	7.05087061195541	3.91795307483983	1.79963120468043	0.0719188904549478	0.146800466205184	28.6004931834362	0	4.28077937245789	0	0	0	Slc46a1	solute carrier family 46, member 1 [Source:MGI Symbol;Acc:MGI:1098733]
ENSMUSG00000025732	5.46365092962721	7.04686067491037	1.82455327536248	3.86223892174943	0.000112352606526364	0.00044177343261726	10.2144618512272	11.8654952953913	10.7019484311447	0	0	0	Mcrip2	MAPK regulated corepressor interacting protein 2 [Source:MGI Symbol;Acc:MGI:1915491]
ENSMUSG00000047880	5.44771298732118	7.04245413959738	3.92346262637189	1.79495889479383	0.0726602492996171	0.148070706298433	32.6862779239271	0	0	0	0	0	Cxcr5	C-X-C motif chemokine receptor 5 [Source:MGI Symbol;Acc:MGI:103567]
ENSMUSG00000023978	5.31709334529406	7.01114030687168	2.05586544799978	3.41031088084732	0.000648888688691806	0.00227074525077659	8.17156948098178	23.7309905907826	0	0	0	0	Prph2	peripherin 2 [Source:MGI Symbol;Acc:MGI:102791]
ENSMUSG00000029757	5.26420606457885	6.98886579592537	1.93418149170809	3.61334540005006	0.000302271614086751	0.00111553473720977	4.08578474049089	3.95516509846377	23.5442865485184	0	0	0	Dync1i1	dynein cytoplasmic 1 intermediate chain 1 [Source:MGI Symbol;Acc:MGI:107743]
ENSMUSG00000027221	10.2615412663401	6.98512582138857	1.49508503401961	4.67205922234987	2.9819494640319e-06	1.43080653874092e-05	20.4289237024544	25.7085731400145	14.9827278036026	0	0.449022951969339	0	Chst1	carbohydrate sulfotransferase 1 [Source:MGI Symbol;Acc:MGI:1924219]
ENSMUSG00000068855	5.23722734692495	6.98281971386153	2.05207824758225	3.40280382684659	0.000666981513440418	0.00233012614681418	14.3002465917181	0	17.1231174898316	0	0	0	H2ac20	H2A clustered histone 20 [Source:MGI Symbol;Acc:MGI:2448316]
ENSMUSG00000041660	5.1881670785753	6.9704000325675	2.06028424897162	3.38322250245165	0.00071640565373524	0.00248603156124587	0	11.8654952953913	19.2635071760605	0	0	0	Bbox1	gamma-butyrobetaine hydroxylase 1 [Source:MGI Symbol;Acc:MGI:1891372]
ENSMUSG00000047842	5.18280249608031	6.96867864780202	1.89657387159833	3.67435128795125	0.000238454477623423	0.00089407848604236	4.08578474049089	9.88791274615941	17.1231174898316	0	0	0	Diras2	DIRAS family, GTP-binding RAS-like 2 [Source:MGI Symbol;Acc:MGI:1915453]
ENSMUSG00000004105	5.16103255574246	6.96352298838779	2.06059947409045	3.37936754616589	0.000726528066319558	0.00251764546135869	0	13.8430778446232	17.1231174898316	0	0	0	Angptl2	angiopoietin-like 2 [Source:MGI Symbol;Acc:MGI:1347002]
ENSMUSG00000067594	5.15597958360536	6.96241134637867	2.09376699234776	3.32530380497195	0.000883222370608144	0.00301610011621458	24.5147084429453	0	6.42116905868684	0	0	0	Krt77	keratin 77 [Source:MGI Symbol;Acc:MGI:3588209]
ENSMUSG00000024743	5.12316886791963	6.95398101446988	1.8703485457353	3.71801343141422	0.000200795596686637	0.000762765679899728	8.17156948098178	11.8654952953913	10.7019484311447	0	0	0	Syt7	synaptotagmin VII [Source:MGI Symbol;Acc:MGI:1859545]
ENSMUSG00000036139	10.0518616381583	6.95295866279434	1.5180513307041	4.58018679748426	4.64560825016502e-06	2.18440188307381e-05	28.6004931834362	9.88791274615941	21.4038968622895	0.418867037064699	0	0	Hoxc9	homeobox C9 [Source:MGI Symbol;Acc:MGI:96199]
ENSMUSG00000055691	5.1176484802457	6.95253593934902	1.93793778505288	3.58759501619362	0.000333742129752024	0.00122296725625396	2.04289237024544	15.8206603938551	12.8423381173737	0	0	0	Gja6	gap junction protein, alpha 6 [Source:MGI Symbol;Acc:MGI:95717]
ENSMUSG00000031425	5.08514937491786	6.94451497508418	1.8917957381253	3.67085876933307	0.000241736893070077	0.000905566788889322	6.12867711073633	15.8206603938551	8.56155874491579	0	0	0	Plp1	proteolipid protein (myelin) 1 [Source:MGI Symbol;Acc:MGI:97623]
ENSMUSG00000056973	5.00926619409327	6.92454754137214	2.08108739480677	3.32736989261092	0.000876699176890082	0.00299464643311781	12.2573542214727	17.7982429430869	0	0	0	0	Ces1d	carboxylesterase 1D [Source:MGI Symbol;Acc:MGI:2148202]
ENSMUSG00000020524	5.00374580641933	6.92359681401038	1.97732651108568	3.50149394912471	0.000462657477117043	0.00165919003543964	6.12867711073633	21.7534080415507	2.14038968622895	0	0	0	Gria1	glutamate receptor, ionotropic, AMPA1 (alpha 1) [Source:MGI Symbol;Acc:MGI:95808]
ENSMUSG00000021978	4.80997713422385	6.86203826667174	1.94873329804084	3.52128137471172	0.000429466642827795	0.00154909415221847	16.3431389619636	3.95516509846377	8.56155874491579	0	0	0	Extl3	exostosin-like glycosyltransferase 3 [Source:MGI Symbol;Acc:MGI:1860765]
ENSMUSG00000031089	4.80445674654991	6.86049295524384	1.91456495278009	3.58331690198439	0.000339258599168194	0.00124281566947123	10.2144618512272	7.91033019692753	10.7019484311447	0	0	0	Slc6a14	solute carrier family 6 (neurotransmitter transporter), member 14 [Source:MGI Symbol;Acc:MGI:1890216]
ENSMUSG00000033530	4.79372758155993	6.85774196236247	1.96346501333319	3.49267336865898	0.000478211058893304	0.00170954611654384	18.386031332209	3.95516509846377	6.42116905868684	0	0	0	Ttc7b	tetratricopeptide repeat domain 7B [Source:MGI Symbol;Acc:MGI:2144724]
ENSMUSG00000020154	4.78268680621206	6.85470937320572	1.92521241840255	3.5604950953378	0.000370156225471541	0.00134727333221819	6.12867711073633	11.8654952953913	10.7019484311447	0	0	0	Ptprb	protein tyrosine phosphatase receptor type B [Source:MGI Symbol;Acc:MGI:97809]
ENSMUSG00000029217	4.78268680621206	6.85470937320572	1.92521241840255	3.5604950953378	0.000370156225471541	0.00134727333221819	6.12867711073633	11.8654952953913	10.7019484311447	0	0	0	Tec	tec protein tyrosine kinase [Source:MGI Symbol;Acc:MGI:98662]
ENSMUSG00000005043	9.33226837524144	6.84433878548144	1.68804157553555	4.05460320686118	5.02194746467547e-05	0.000207915980752892	0	27.6861556892464	27.8250659209763	0	0	0.482388641225955	Sgsh	N-sulfoglucosamine sulfohydrolase (sulfamidase) [Source:MGI Symbol;Acc:MGI:1350341]
ENSMUSG00000002020	4.73393814822031	6.84172929978013	1.9475243419407	3.51303917103413	0.000443012160088477	0.00159425411892951	12.2573542214727	11.8654952953913	4.28077937245789	0	0	0	Ltbp2	latent transforming growth factor beta binding protein 2 [Source:MGI Symbol;Acc:MGI:99502]
ENSMUSG00000058013	4.70680362538747	6.83426607264978	1.98891201049167	3.43618321806017	0.000589971845980855	0.00207919519650436	12.2573542214727	13.8430778446232	2.14038968622895	0	0	0	Septin11	septin 11 [Source:MGI Symbol;Acc:MGI:1277214]
ENSMUSG00000013089	4.70664782020852	6.83404942921976	2.01405210996186	3.39318401714501	0.000690852117043525	0.00240541091256168	2.04289237024544	19.7758254923188	6.42116905868684	0	0	0	Etv5	ets variant 5 [Source:MGI Symbol;Acc:MGI:1096867]
ENSMUSG00000070469	4.65789916221677	6.82004892655723	2.14747547165477	3.17584485437775	0.00149400829300361	0.00488715968965964	8.17156948098178	19.7758254923188	0	0	0	0	Adamtsl3	ADAMTS-like 3 [Source:MGI Symbol;Acc:MGI:3028499]
ENSMUSG00000026875	9.10043964950869	6.80590666068494	1.55894417673378	4.36571543885832	1.26707346252605e-05	5.68286788800449e-05	14.3002465917181	9.88791274615941	29.9654556072053	0	0.449022951969339	0	Traf1	TNF receptor-associated factor 1 [Source:MGI Symbol;Acc:MGI:101836]
ENSMUSG00000026220	4.5562632235098	6.78138401174886	2.16056096305629	3.13871449484862	0.00169690692397742	0.00550167659371927	10.2144618512272	0	17.1231174898316	0	0	0	Slc16a14	solute carrier family 16 (monocarboxylic acid transporters), member 14 [Source:MGI Symbol;Acc:MGI:1919031]
ENSMUSG00000029561	4.54001367084588	6.77669270769209	2.15928909548279	3.13839064989902	0.00169878306573575	0.00550488926226044	12.2573542214727	0	14.9827278036026	0	0	0	Oasl2	2'-5' oligoadenylate synthetase-like 2 [Source:MGI Symbol;Acc:MGI:1344390]
ENSMUSG00000025227	4.52360831300302	6.7713272006393	2.00110103628904	3.38380075660569	0.000714898614726632	0.00248218706626329	4.08578474049089	5.93274764769565	17.1231174898316	0	0	0	Mfsd13a	major facilitator superfamily domain containing 13a [Source:MGI Symbol;Acc:MGI:1922396]
ENSMUSG00000022235	4.50751456551805	6.76730206472761	2.16758907585924	3.12204104555427	0.00179601896607552	0.00580033442770222	16.3431389619636	0	10.7019484311447	0	0	0	Cmbl	carboxymethylenebutenolidase homolog [Source:MGI Symbol;Acc:MGI:1916824]
ENSMUSG00000038777	25.0148049699284	6.76709358138223	1.00356722178852	6.74303966337418	1.55106843886272e-11	1.12481855242774e-10	42.9007397751543	41.5292335338695	64.2116905868684	0	0	1.44716592367787	Sema6c	sema domain, transmembrane domain (TM), and cytoplasmic domain, (semaphorin) 6C [Source:MGI Symbol;Acc:MGI:1338032]
ENSMUSG00000030399	4.47501546019021	6.75785827697204	2.19322895677606	3.08123703003892	0.00206142475936183	0.00659569044508243	20.4289237024544	0	6.42116905868684	0	0	0	Ckm	creatine kinase, muscle [Source:MGI Symbol;Acc:MGI:88413]
ENSMUSG00000013367	4.47485965501127	6.75745639104045	1.97256920255626	3.42571321821483	0.000613187442039131	0.00215308080650499	10.2144618512272	5.93274764769565	10.7019484311447	0	0	0	Iglon5	IgLON family member 5 [Source:MGI Symbol;Acc:MGI:2686277]
ENSMUSG00000021596	4.46397468484234	6.75433966368876	1.96874152035324	3.43079047902482	0.000601825242535532	0.00211655443616053	8.17156948098178	7.91033019692753	10.7019484311447	0	0	0	Mctp1	multiple C2 domains, transmembrane 1 [Source:MGI Symbol;Acc:MGI:1926021]
ENSMUSG00000029695	4.4587659075263	6.75309810104644	2.21756164042018	3.04528089679927	0.00232463086578298	0.00735472757001855	22.4718160726999	0	4.28077937245789	0	0	0	Aass	aminoadipate-semialdehyde synthase [Source:MGI Symbol;Acc:MGI:1353573]
ENSMUSG00000038816	4.44251635486238	6.74829308563406	2.26139442567537	2.98412917667764	0.0028438668203773	0.00883298342530232	24.5147084429453	0	2.14038968622895	0	0	0	Ctnnal1	catenin alpha like 1 [Source:MGI Symbol;Acc:MGI:1859649]
ENSMUSG00000021504	4.42595519184057	6.74346750572153	1.9816417776684	3.4029699927178	0.000666576009418587	0.00232936381824641	6.12867711073633	11.8654952953913	8.56155874491579	0	0	0	B4galt7	beta-1,4-galactosyltransferase 7 [Source:MGI Symbol;Acc:MGI:2384987]
ENSMUSG00000006494	4.39361189169168	6.73374721915581	2.20544365691273	3.05323928727428	0.00226385340266325	0.00717338720227333	20.4289237024544	5.93274764769565	0	0	0	0	Pdk1	pyruvate dehydrogenase kinase, isoenzyme 1 [Source:MGI Symbol;Acc:MGI:1926119]
ENSMUSG00000019853	4.35007201101597	6.72071698154144	2.18764971951167	3.07211749742168	0.00212546043274518	0.00677456468530289	12.2573542214727	13.8430778446232	0	0	0	0	Hebp2	heme binding protein 2 [Source:MGI Symbol;Acc:MGI:1860084]
ENSMUSG00000037035	4.33366665317311	6.71620129203575	2.08682882724151	3.21837670841149	0.00128918380689909	0.0042627636550873	4.08578474049089	19.7758254923188	2.14038968622895	0	0	0	Inhbb	inhibin beta-B [Source:MGI Symbol;Acc:MGI:96571]
ENSMUSG00000050875	4.31741710050919	6.71071502297328	2.21724203281399	3.02660463930338	0.00247317203608609	0.00779494186842442	6.12867711073633	19.7758254923188	0	0	0	0	Minar2	membrane integral NOTCH2 associated receptor 2 [Source:MGI Symbol;Acc:MGI:2442934]
ENSMUSG00000039960	4.28077937245789	6.69044329357719	2.46789746867494	2.71098916324486	0.00670828186400985	0.0190461155899831	0	0	25.6846762347474	0	0	0	Rhou	ras homolog family member U [Source:MGI Symbol;Acc:MGI:1916831]
ENSMUSG00000054648	4.28077937245789	6.69044329357719	2.46789746867494	2.71098916324486	0.00670828186400985	0.0190461155899831	0	0	25.6846762347474	0	0	0	Zfp869	zinc finger protein 869 [Source:MGI Symbol;Acc:MGI:1914119]
ENSMUSG00000085484	4.26452981979398	6.68454108529323	2.29399300776068	2.91393263304602	0.00356906916450577	0.0108652205391866	2.04289237024544	0	23.5442865485184	0	0	0	Gm13539	predicted gene 13539 [Source:MGI Symbol;Acc:MGI:3651926]
ENSMUSG00000074781	4.24828026713006	6.67928922499993	2.2557167959796	2.96104955945912	0.00306592599951117	0.00947116782312975	4.08578474049089	0	21.4038968622895	0	0	0	Ube2n	ubiquitin-conjugating enzyme E2N [Source:MGI Symbol;Acc:MGI:1934835]
ENSMUSG00000033610	4.21578116180223	6.66904291840974	2.22767908991591	2.99371796799577	0.00275600572508169	0.00859058726888244	8.17156948098178	0	17.1231174898316	0	0	0	Pank1	pantothenate kinase 1 [Source:MGI Symbol;Acc:MGI:1922985]
ENSMUSG00000019767	4.11828384581872	6.63841516053515	2.27737277945001	2.91494445724356	0.00355751849885712	0.0108354181195691	20.4289237024544	0	4.28077937245789	0	0	0	Ccdc170	coiled-coil domain containing 170 [Source:MGI Symbol;Acc:MGI:2685067]
ENSMUSG00000026833	4.11828384581872	6.63841516053515	2.27737277945001	2.91494445724356	0.00355751849885712	0.0108354181195691	20.4289237024544	0	4.28077937245789	0	0	0	Olfm1	olfactomedin 1 [Source:MGI Symbol;Acc:MGI:1860437]
ENSMUSG00000033350	4.09099351780693	6.62973515927153	2.03821677239715	3.25271347437411	0.00114308697021297	0.00381141357869671	10.2144618512272	7.91033019692753	6.42116905868684	0	0	0	Chst2	carbohydrate sulfotransferase 2 [Source:MGI Symbol;Acc:MGI:1891160]
ENSMUSG00000002881	4.08562893531194	6.62807671374683	2.06626262576766	3.20776102277142	0.00133772606031563	0.004408399314294	14.3002465917181	5.93274764769565	4.28077937245789	0	0	0	Nab1	Ngfi-A binding protein 1 [Source:MGI Symbol;Acc:MGI:107564]
ENSMUSG00000051652	4.08578474049089	6.62787225192514	2.50668359046024	2.64408012130012	0.00819132641412484	0.0227147216527248	24.5147084429453	0	0	0	0	0	Lrrc3	leucine rich repeat containing 3 [Source:MGI Symbol;Acc:MGI:2447899]
ENSMUSG00000021417	4.06401480015303	6.62095892806119	2.28676976037853	2.89533255283437	0.00378757042184683	0.011458529150209	20.4289237024544	3.95516509846377	0	0	0	0	Eci2	enoyl-Coenzyme A delta isomerase 2 [Source:MGI Symbol;Acc:MGI:1346064]
ENSMUSG00000039086	4.05833860730015	6.61943127923809	2.07013705809843	3.19758117142182	0.00138585401696931	0.00456095962134092	4.08578474049089	13.8430778446232	6.42116905868684	0	0	0	Ss18l1	SS18, nBAF chromatin remodeling complex subunit like 1 [Source:MGI Symbol;Acc:MGI:2444061]
ENSMUSG00000087651	4.04208905463623	6.61433308377859	2.07247586198854	3.19151272402861	0.00141529877029444	0.00464925272217433	6.12867711073633	13.8430778446232	4.28077937245789	0	0	0	1500009L16Rik	RIKEN cDNA 1500009L16 gene [Source:MGI Symbol;Acc:MGI:1917034]
ENSMUSG00000008206	4.04224485981518	6.61394539790453	2.2572162984374	2.93013363516963	0.00338816260602329	0.0103766330449721	16.3431389619636	7.91033019692753	0	0	0	0	Cers4	ceramide synthase 4 [Source:MGI Symbol;Acc:MGI:1914510]
ENSMUSG00000037490	4.04224485981518	6.61394539790453	2.2572162984374	2.93013363516963	0.00338816260602329	0.0103766330449721	16.3431389619636	7.91033019692753	0	0	0	0	Slc2a12	solute carrier family 2 (facilitated glucose transporter), member 12 [Source:MGI Symbol;Acc:MGI:3052471]
ENSMUSG00000044456	4.03135988964625	6.61041809174843	2.2526488961962	2.93450883664592	0.00334076040597778	0.0102514278729696	14.3002465917181	9.88791274615941	0	0	0	0	Rin3	Ras and Rab interactor 3 [Source:MGI Symbol;Acc:MGI:2385708]
ENSMUSG00000051557	4.03135988964625	6.61041809174843	2.2526488961962	2.93450883664592	0.00334076040597778	0.0102514278729696	14.3002465917181	9.88791274615941	0	0	0	0	Pusl1	pseudouridylate synthase-like 1 [Source:MGI Symbol;Acc:MGI:3047787]
ENSMUSG00000030158	4.02047491947733	6.60687314654569	2.25253383232254	2.93308497823248	0.00335612019206766	0.0102909434982114	12.2573542214727	11.8654952953913	0	0	0	0	Clec12b	C-type lectin domain family 12, member B [Source:MGI Symbol;Acc:MGI:1918433]
ENSMUSG00000025875	3.99870497913947	6.59971129670149	2.26497765258675	2.91380857076634	0.00357048776583225	0.0108652205391866	8.17156948098178	15.8206603938551	0	0	0	0	Tspan17	tetraspanin 17 [Source:MGI Symbol;Acc:MGI:1921507]
ENSMUSG00000026737	3.99870497913947	6.59971129670149	2.26497765258675	2.91380857076634	0.00357048776583225	0.0108652205391866	8.17156948098178	15.8206603938551	0	0	0	0	Pip4k2a	phosphatidylinositol-5-phosphate 4-kinase, type II, alpha [Source:MGI Symbol;Acc:MGI:1298206]
ENSMUSG00000028636	3.98782000897055	6.59607810024481	2.27913037311894	2.89412057249635	0.00380222128286697	0.0115000549841966	6.12867711073633	17.7982429430869	0	0	0	0	Ppcs	phosphopantothenoylcysteine synthetase [Source:MGI Symbol;Acc:MGI:1915237]
ENSMUSG00000035262	3.98229962129661	6.59395650188339	2.34260051756918	2.81480194870172	0.00488073026323112	0.0143706539497646	0	21.7534080415507	2.14038968622895	0	0	0	Amh	anti-Mullerian hormone [Source:MGI Symbol;Acc:MGI:88006]
ENSMUSG00000035228	3.95516509846376	6.58416280175008	2.53443711375353	2.5978797288045	0.00938013421665757	0.0256172000993786	0	23.7309905907826	0	0	0	0	Ccdc106	coiled-coil domain containing 106 [Source:MGI Symbol;Acc:MGI:2385900]
ENSMUSG00000043251	14.5580727059068	6.56593475613421	1.27927996339581	5.13252371959702	2.8588268635145e-07	1.50339237638604e-06	42.9007397751543	17.7982429430869	25.6846762347474	0	0	0.964777282451911	Exoc3l	exocyst complex component 3-like [Source:MGI Symbol;Acc:MGI:3041195]
ENSMUSG00000030598	3.9240477580864	6.56488125957483	2.54570217718584	2.5788096181903	0.00991414094192666	0.026927750795969	0	0	23.5442865485184	0	0	0	Fbxo17	F-box protein 17 [Source:MGI Symbol;Acc:MGI:1354707]
ENSMUSG00000043068	3.89154865275857	6.55281525202733	2.32410185985536	2.81950432776433	0.0048097882392962	0.0141852825070256	4.08578474049089	0	19.2635071760605	0	0	0	Fam89a	family with sequence similarity 89, member A [Source:MGI Symbol;Acc:MGI:1916877]
ENSMUSG00000028150	3.87529910009465	6.54722234363189	2.30697245070735	2.83801496702937	0.00453950539613581	0.0134679934665413	6.12867711073633	0	17.1231174898316	0	0	0	Rorc	RAR-related orphan receptor gamma [Source:MGI Symbol;Acc:MGI:104856]
ENSMUSG00000078350	3.87529910009465	6.54722234363189	2.30697245070735	2.83801496702937	0.00453950539613581	0.0134679934665413	6.12867711073633	0	17.1231174898316	0	0	0	Smim1	small integral membrane protein 1 [Source:MGI Symbol;Acc:MGI:1916109]
ENSMUSG00000034875	7.60299459369312	6.5471126383926	1.60799732077083	4.07159424572555	4.66924631148031e-05	0.000194153849468006	16.3431389619636	13.8430778446232	14.9827278036026	0	0.449022951969339	0	Nudt19	nudix hydrolase 19 [Source:MGI Symbol;Acc:MGI:94203]
ENSMUSG00000030830	3.84279999476682	6.53612116717081	2.29728623813215	2.84514879281439	0.00443906818134071	0.0131951938268008	10.2144618512272	0	12.8423381173737	0	0	0	Itgal	integrin alpha L [Source:MGI Symbol;Acc:MGI:96606]
ENSMUSG00000079677	3.84264418958787	6.53603743968572	2.31321432480047	2.82552177271749	0.00472036798447886	0.0139546509681397	0	5.93274764769565	17.1231174898316	0	0	0	Fdx2	ferredoxin 2 [Source:MGI Symbol;Acc:MGI:1915415]
ENSMUSG00000070808	3.83727960709288	6.5336067217722	2.13234656188768	3.0640454223296	0.00218365752724459	0.00694581807323298	4.08578474049089	3.95516509846377	14.9827278036026	0	0	0	Bicra	BRD4 interacting chromatin remodeling complex associated protein [Source:MGI Symbol;Acc:MGI:2154263]
ENSMUSG00000025068	3.82103005442896	6.52811520136642	2.1164663907603	3.08444075930793	0.00203935219809076	0.00652855168279402	6.12867711073633	3.95516509846377	12.8423381173737	0	0	0	Gsto1	glutathione S-transferase omega 1 [Source:MGI Symbol;Acc:MGI:1342273]
ENSMUSG00000031139	3.79405133677507	6.51943313166645	2.32269701332861	2.80683752304119	0.00500304691687744	0.0146786729193689	16.3431389619636	0	6.42116905868684	0	0	0	Mcf2	mcf.2 transforming sequence [Source:MGI Symbol;Acc:MGI:96932]
ENSMUSG00000055976	3.79405133677507	6.51943313166645	2.32269701332861	2.80683752304119	0.00500304691687744	0.0146786729193689	16.3431389619636	0	6.42116905868684	0	0	0	Cldn23	claudin 23 [Source:MGI Symbol;Acc:MGI:1919158]
ENSMUSG00000019960	3.78837514392218	6.51732041768112	2.30790414214772	2.82391296010074	0.0047441266417497	0.014008239089136	0	9.88791274615941	12.8423381173737	0	0	0	Dusp6	dual specificity phosphatase 6 [Source:MGI Symbol;Acc:MGI:1914853]
ENSMUSG00000031887	3.78837514392218	6.51732041768112	2.30790414214772	2.82391296010074	0.0047441266417497	0.014008239089136	0	9.88791274615941	12.8423381173737	0	0	0	Tradd	TNFRSF1A-associated via death domain [Source:MGI Symbol;Acc:MGI:109200]
ENSMUSG00000006457	7.46337972251988	6.51456914914412	1.72410160420287	3.77852971847103	0.00015775702821677	0.000606874160201661	10.2144618512272	1.97758254923188	32.1058452934342	0	0	0.482388641225955	Actn3	actinin alpha 3 [Source:MGI Symbol;Acc:MGI:99678]
ENSMUSG00000044030	3.74514687360437	6.5025315600702	2.12882665208757	3.05451435122428	0.0022542522898385	0.00714842828371277	12.2573542214727	5.93274764769565	4.28077937245789	0	0	0	Irf2bp1	interferon regulatory factor 2 binding protein 1 [Source:MGI Symbol;Acc:MGI:2442159]
ENSMUSG00000039450	3.74530267878331	6.50234254575305	2.5867876883345	2.51367461468767	0.011948061382934	0.031915386473271	22.4718160726999	0	0	0	0	0	Dcxr	dicarbonyl L-xylulose reductase [Source:MGI Symbol;Acc:MGI:1915130]
ENSMUSG00000043398	3.74530267878331	6.50234254575305	2.5867876883345	2.51367461468767	0.011948061382934	0.031915386473271	22.4718160726999	0	0	0	0	0	Gpr135	G protein-coupled receptor 135 [Source:MGI Symbol;Acc:MGI:2676315]
ENSMUSG00000091474	3.74530267878331	6.50234254575305	2.5867876883345	2.51367461468767	0.011948061382934	0.031915386473271	22.4718160726999	0	0	0	0	0	2610021A01Rik	RIKEN cDNA 2610021A01 gene [Source:MGI Symbol;Acc:MGI:1922662]
ENSMUSG00000042742	3.73962648593043	6.50060919088003	2.11269836086701	3.07692253247753	0.00209149648047441	0.00667829055909121	6.12867711073633	9.88791274615941	6.42116905868684	0	0	0	Bmt2	base methyltransferase of 25S rRNA 2 [Source:MGI Symbol;Acc:MGI:2141466]
ENSMUSG00000070803	3.73441770861439	6.49859985381067	2.39548955286586	2.71284833867717	0.0066707629094918	0.0189719364979075	20.4289237024544	1.97758254923188	0	0	0	0	Cited4	Cbp/p300-interacting transactivator, with Glu/Asp-rich carboxy-terminal domain, 4 [Source:MGI Symbol;Acc:MGI:1861694]
ENSMUSG00000101819	3.72337693326651	6.49506827041945	2.1243967212289	3.05737069047172	0.00223287957208753	0.00708788239868621	8.17156948098178	9.88791274615941	4.28077937245789	0	0	0	H2al1b	H2A histone family member L1B [Source:MGI Symbol;Acc:MGI:3650131]
ENSMUSG00000091811	3.72353273844546	6.49479058824049	2.35704234980122	2.75548319646791	0.0058605514752672	0.0169263376096047	18.386031332209	3.95516509846377	0	0	0	0	Inafm1	InaF motif containing 1 [Source:MGI Symbol;Acc:MGI:1913550]
ENSMUSG00000022479	3.71249196309759	6.49129587302988	2.13428004058052	3.0414452413022	0.00235445386707319	0.00744340181616404	6.12867711073633	11.8654952953913	4.28077937245789	0	0	0	Vdr	vitamin D (1,25-dihydroxyvitamin D3) receptor [Source:MGI Symbol;Acc:MGI:103076]
ENSMUSG00000006764	3.70176279810761	6.48712706344615	2.3303270541355	2.78378395510356	0.00537288092905673	0.0156405326565295	14.3002465917181	7.91033019692753	0	0	0	0	Tph2	tryptophan hydroxylase 2 [Source:MGI Symbol;Acc:MGI:2651811]
ENSMUSG00000034472	3.70176279810761	6.48712706344615	2.3303270541355	2.78378395510356	0.00537288092905673	0.0156405326565295	14.3002465917181	7.91033019692753	0	0	0	0	Rasd2	RASD family, member 2 [Source:MGI Symbol;Acc:MGI:1922391]
ENSMUSG00000042348	3.70176279810761	6.48712706344615	2.3303270541355	2.78378395510356	0.00537288092905673	0.0156405326565295	14.3002465917181	7.91033019692753	0	0	0	0	Arl15	ADP-ribosylation factor-like 15 [Source:MGI Symbol;Acc:MGI:2442308]
ENSMUSG00000032402	3.69087782793868	6.48326971553865	2.32763829335795	2.78534243659723	0.00534712202232745	0.0155852253554456	12.2573542214727	9.88791274615941	0	0	0	0	Smad3	SMAD family member 3 [Source:MGI Symbol;Acc:MGI:1201674]
ENSMUSG00000003411	3.67983705259081	6.47913986254009	2.36601931000814	2.73841377166013	0.00617363476091513	0.0177160811078684	0	17.7982429430869	4.28077937245789	0	0	0	Rab3b	RAB3B, member RAS oncogene family [Source:MGI Symbol;Acc:MGI:1917158]
ENSMUSG00000022179	3.66910788760083	6.47548212583387	2.33709661240024	2.77073788540707	0.00559294293221622	0.0162294519943941	8.17156948098178	13.8430778446232	0	0	0	0	4931414P19Rik	RIKEN cDNA 4931414P19 gene [Source:MGI Symbol;Acc:MGI:1921609]
ENSMUSG00000093769	3.64733794726297	6.46753098888959	2.37283024012527	2.72566106058566	0.00641728588641991	0.0183391049102492	4.08578474049089	17.7982429430869	0	0	0	0	H3c14	H3 clustered histone 14 [Source:MGI Symbol;Acc:MGI:2448355]
ENSMUSG00000045312	3.63645297709405	6.46341311859195	2.41588200637675	2.67538443580096	0.00746436023567386	0.0209558122462925	2.04289237024544	19.7758254923188	0	0	0	0	Lhfpl2	lipoma HMGIC fusion partner-like 2 [Source:MGI Symbol;Acc:MGI:2145236]
ENSMUSG00000054892	3.63645297709405	6.46341311859195	2.41588200637675	2.67538443580096	0.00746436023567386	0.0209558122462925	2.04289237024544	19.7758254923188	0	0	0	0	Txk	TXK tyrosine kinase [Source:MGI Symbol;Acc:MGI:102960]
ENSMUSG00000019927	3.62556800692512	6.4586530648735	2.61616499068096	2.46874837324093	0.0135586522367776	0.0357037810435747	0	21.7534080415507	0	0	0	0	Ube2d1	ubiquitin-conjugating enzyme E2D 1 [Source:MGI Symbol;Acc:MGI:2384911]
ENSMUSG00000029600	3.62556800692512	6.4586530648735	2.61616499068096	2.46874837324093	0.0135586522367776	0.0357037810435747	0	21.7534080415507	0	0	0	0	Rita1	RBPJ interacting and tubulin associated 1 [Source:MGI Symbol;Acc:MGI:1922021]
ENSMUSG00000055114	3.56731614371491	6.42734348733199	2.63581395568121	2.43846629367697	0.0147497341619718	0.0384092218954028	0	0	21.4038968622895	0	0	0	Anxa13	annexin A13 [Source:MGI Symbol;Acc:MGI:1917037]
ENSMUSG00000062545	3.56731614371491	6.42734348733199	2.63581395568121	2.43846629367697	0.0147497341619718	0.0384092218954028	0	0	21.4038968622895	0	0	0	Tlr12	toll-like receptor 12 [Source:MGI Symbol;Acc:MGI:3045221]
ENSMUSG00000073530	3.50231793305924	6.40194806075284	2.38273437313154	2.68680728030082	0.00721385612668263	0.0203167410886666	8.17156948098178	0	12.8423381173737	0	0	0	Pappa2	pappalysin 2 [Source:MGI Symbol;Acc:MGI:3051647]
ENSMUSG00000032327	3.49679754538531	6.39931021173326	2.23964389232921	2.85728915817864	0.00427276396048458	0.0127434928960544	2.04289237024544	3.95516509846377	14.9827278036026	0	0	0	Stra6	stimulated by retinoic acid gene 6 [Source:MGI Symbol;Acc:MGI:107742]
ENSMUSG00000016319	3.48591257521638	6.39573361456708	2.39583669590021	2.6695198489578	0.00759597833425408	0.0212581418863902	0	5.93274764769565	14.9827278036026	0	0	0	Slc25a5	solute carrier family 25 (mitochondrial carrier, adenine nucleotide translocator), member 5 [Source:MGI Symbol;Acc:MGI:1353496]
ENSMUSG00000028128	3.48591257521638	6.39573361456708	2.39583669590021	2.6695198489578	0.00759597833425408	0.0212581418863902	0	5.93274764769565	14.9827278036026	0	0	0	F3	coagulation factor III [Source:MGI Symbol;Acc:MGI:88381]
ENSMUSG00000045007	3.46981882773141	6.38973782364045	2.39014290318996	2.67337062361941	0.00750932354971459	0.0210626287694039	12.2573542214727	0	8.56155874491579	0	0	0	Tubg2	tubulin, gamma 2 [Source:MGI Symbol;Acc:MGI:2144208]
ENSMUSG00000020312	3.45877805238354	6.38544714296718	2.39267578890432	2.66874733826403	0.0076134698785508	0.0212939504149946	0	7.91033019692753	12.8423381173737	0	0	0	Shc2	SHC (Src homology 2 domain containing) transforming protein 2 [Source:MGI Symbol;Acc:MGI:106180]
ENSMUSG00000045216	3.45877805238354	6.38544714296718	2.39267578890432	2.66874733826403	0.0076134698785508	0.0212939504149946	0	7.91033019692753	12.8423381173737	0	0	0	Hs6st1	heparan sulfate 6-O-sulfotransferase 1 [Source:MGI Symbol;Acc:MGI:1354958]
ENSMUSG00000069835	3.45356927506749	6.3836059297303	2.40327336460208	2.65621299006377	0.00790236860640604	0.0220115920174405	14.3002465917181	0	6.42116905868684	0	0	0	Sat2	spermidine/spermine N1-acetyl transferase 2 [Source:MGI Symbol;Acc:MGI:1916465]
ENSMUSG00000005958	3.43731972240357	6.37744104700028	2.42602223365441	2.62876446824384	0.00856956917287683	0.0236423539935823	16.3431389619636	0	4.28077937245789	0	0	0	Ephb3	Eph receptor B3 [Source:MGI Symbol;Acc:MGI:104770]
ENSMUSG00000060630	3.42091436456071	6.37106926505468	2.18540886225324	2.91527566081427	0.00355374497770904	0.0108301706169486	8.17156948098178	5.93274764769565	6.42116905868684	0	0	0	Zfp735	zinc finger protein 735 [Source:MGI Symbol;Acc:MGI:1923640]
ENSMUSG00000003166	3.40482061707574	6.36484013890721	2.67949005031555	2.37539233935863	0.0175303055752367	0.0446496847100592	20.4289237024544	0	0	0	0	0	Dgcr2	DiGeorge syndrome critical region gene 2 [Source:MGI Symbol;Acc:MGI:892866]
ENSMUSG00000043501	3.40482061707574	6.36484013890721	2.67949005031555	2.37539233935863	0.0175303055752367	0.0446496847100592	20.4289237024544	0	0	0	0	0	Lgals2	lectin, galactose-binding, soluble 2 [Source:MGI Symbol;Acc:MGI:895068]
ENSMUSG00000055912	3.40482061707574	6.36484013890721	2.67949005031555	2.37539233935863	0.0175303055752367	0.0446496847100592	20.4289237024544	0	0	0	0	0	Tmem150a	transmembrane protein 150A [Source:MGI Symbol;Acc:MGI:2385244]
ENSMUSG00000079629	3.40482061707574	6.36484013890721	2.67949005031555	2.37539233935863	0.0175303055752367	0.0446496847100592	20.4289237024544	0	0	0	0	0	Rhox2g	reproductive homeobox 2G [Source:MGI Symbol;Acc:MGI:3648776]
ENSMUSG00000023827	6.67954012641039	6.35637068163581	1.72923991739276	3.67581769175184	0.000237088794100889	0.000889225974738466	4.08578474049089	9.88791274615941	25.6846762347474	0.418867037064699	0	0	Agpat4	1-acylglycerol-3-phosphate O-acyltransferase 4 [Source:MGI Symbol;Acc:MGI:1915512]
ENSMUSG00000020660	3.36128073640003	6.34807584734175	2.41576731271145	2.62776792033695	0.00859471305248637	0.0236854523008582	12.2573542214727	7.91033019692753	0	0	0	0	Pomc	pro-opiomelanocortin-alpha [Source:MGI Symbol;Acc:MGI:97742]
ENSMUSG00000049866	3.36128073640003	6.34807584734175	2.41576731271145	2.62776792033695	0.00859471305248637	0.0236854523008582	12.2573542214727	7.91033019692753	0	0	0	0	Arl4c	ADP-ribosylation factor-like 4C [Source:MGI Symbol;Acc:MGI:2445172]
ENSMUSG00000022386	3.35023996105216	6.3435834878738	2.44676424360574	2.59264189610904	0.00952418831979553	0.0259536218521685	0	15.8206603938551	4.28077937245789	0	0	0	Trmu	tRNA 5-methylaminomethyl-2-thiouridylate methyltransferase [Source:MGI Symbol;Acc:MGI:1919276]
ENSMUSG00000037463	3.35023996105216	6.3435834878738	2.44676424360574	2.59264189610904	0.00952418831979553	0.0259536218521685	0	15.8206603938551	4.28077937245789	0	0	0	Fbxo27	F-box protein 27 [Source:MGI Symbol;Acc:MGI:2685007]
ENSMUSG00000044288	3.33951079606218	6.33953670147004	2.42107579033639	2.61847924248138	0.0088322664973958	0.0242594740344769	8.17156948098178	11.8654952953913	0	0	0	0	Cnr1	cannabinoid receptor 1 [Source:MGI Symbol;Acc:MGI:104615]
ENSMUSG00000061082	3.29597091538647	6.32117268891413	2.71069590593359	2.33193722507839	0.0197039938103429	0.0494668088452229	0	19.7758254923188	0	0	0	0	Plac1	placental specific protein 1 [Source:MGI Symbol;Acc:MGI:1926287]
ENSMUSG00000061877	3.29597091538647	6.32117268891413	2.71069590593359	2.33193722507839	0.0197039938103429	0.0494668088452229	0	19.7758254923188	0	0	0	0	BC048679	cDNA sequence BC048679 [Source:MGI Symbol;Acc:MGI:3510776]
ENSMUSG00000044982	3.21058452934342	6.27530488146706	2.74154978059374	2.28896258820002	0.0220815261866824	0.0546523266037351	0	0	19.2635071760605	0	0	0	Sft2d3	SFT2 domain containing 3 [Source:MGI Symbol;Acc:MGI:1914408]
ENSMUSG00000045287	3.21058452934342	6.27530488146706	2.74154978059374	2.28896258820002	0.0220815261866824	0.0546523266037351	0	0	19.2635071760605	0	0	0	Rtn4rl1	reticulon 4 receptor-like 1 [Source:MGI Symbol;Acc:MGI:2661375]
ENSMUSG00000095362	3.21058452934342	6.27530488146706	2.74154978059374	2.28896258820002	0.0220815261866824	0.0546523266037351	0	0	19.2635071760605	0	0	0	Gm14325	predicted gene 14325 [Source:MGI Symbol;Acc:MGI:3702875]
ENSMUSG00000021460	6.27958024172109	6.2677968488056	1.72370206623998	3.6362414198864	0.000276645074565208	0.00102736183707599	16.3431389619636	5.93274764769565	14.9827278036026	0.418867037064699	0	0	Auh	AU RNA binding protein/enoyl-coenzyme A hydratase [Source:MGI Symbol;Acc:MGI:1338011]
ENSMUSG00000075419	3.1943349766795	6.26769054218851	2.53241830567026	2.47498232347899	0.0133242770368731	0.0351612014982174	2.04289237024544	0	17.1231174898316	0	0	0	Dolk	dolichol kinase [Source:MGI Symbol;Acc:MGI:2677836]
ENSMUSG00000041544	3.16183587135167	6.25401354765648	2.48496169171142	2.51674445063549	0.0118444703631812	0.0316931320797945	6.12867711073633	0	12.8423381173737	0	0	0	Disp3	dispatched RND transporter family member 3 [Source:MGI Symbol;Acc:MGI:2444403]
ENSMUSG00000027840	3.12933676602383	6.24045368881897	2.48646773397526	2.50976660728349	0.012081098041632	0.0322292184349587	10.2144618512272	0	8.56155874491579	0	0	0	Wnt2b	wingless-type MMTV integration site family, member 2B [Source:MGI Symbol;Acc:MGI:1261834]
ENSMUSG00000043259	3.12933676602383	6.24045368881897	2.48646773397526	2.50976660728349	0.012081098041632	0.0322292184349587	10.2144618512272	0	8.56155874491579	0	0	0	Fam13c	family with sequence similarity 13, member C [Source:MGI Symbol;Acc:MGI:1918971]
ENSMUSG00000049939	3.12933676602383	6.24045368881897	2.48646773397526	2.50976660728349	0.012081098041632	0.0322292184349587	10.2144618512272	0	8.56155874491579	0	0	0	Lrrc4	leucine rich repeat containing 4 [Source:MGI Symbol;Acc:MGI:2182081]
ENSMUSG00000091175	3.12933676602383	6.24045368881897	2.48646773397526	2.50976660728349	0.012081098041632	0.0322292184349587	10.2144618512272	0	8.56155874491579	0	0	0	S100a7l2	S100 calcium binding protein A7 like 2 [Source:MGI Symbol;Acc:MGI:2684973]
ENSMUSG00000039031	3.1238163783499	6.23762277509643	2.28983859560478	2.72404473706977	0.00644877705365016	0.0184079504742362	4.08578474049089	3.95516509846377	10.7019484311447	0	0	0	Arhgap18	Rho GTPase activating protein 18 [Source:MGI Symbol;Acc:MGI:1921160]
ENSMUSG00000021684	3.11308721335992	6.23364895014628	2.49821985883183	2.4952363292241	0.0125873264841987	0.0334148515440724	12.2573542214727	0	6.42116905868684	0	0	0	Pde8b	phosphodiesterase 8B [Source:MGI Symbol;Acc:MGI:2443999]
ENSMUSG00000025429	3.11308721335992	6.23364895014628	2.49821985883183	2.4952363292241	0.0125873264841987	0.0334148515440724	12.2573542214727	0	6.42116905868684	0	0	0	Pstpip2	proline-serine-threonine phosphatase-interacting protein 2 [Source:MGI Symbol;Acc:MGI:1335088]
ENSMUSG00000096188	3.10204643801204	6.22885721780427	2.49397138867318	2.49756562809571	0.0125049315880691	0.0332386907802554	0	7.91033019692753	10.7019484311447	0	0	0	Cmtm4	CKLF-like MARVEL transmembrane domain containing 4 [Source:MGI Symbol;Acc:MGI:2142888]
ENSMUSG00000019891	3.09684	6.22680881830512	2.52006786568615	2.47088933718446	0.0134777518601022	0.0355283594497863	14.3002465917181	0	4.28077937245789	0	0	0	Dcbld1	discoidin, CUB and LCCL domain containing 1 [Source:MGI Symbol;Acc:MGI:1913936]
ENSMUSG00000038415	3.08579688534813	6.22190953661452	2.31506968535355	2.68757	0.00719742286792772	0.0202796439076613	2.04289237024544	7.91033019692753	8.56155874491579	0	0	0	Foxq1	forkhead box Q1 [Source:MGI Symbol;Acc:MGI:1298228]
ENSMUSG00000022228	3.06954733268421	6.2151701013496	2.28942843836451	2.71472564820131	0.00663306952559014	0.0188820063377808	4.08578474049089	7.91033019692753	6.42116905868684	0	0	0	Zscan26	zinc finger and SCAN domain containing 26 [Source:MGI Symbol;Acc:MGI:3531417]
ENSMUSG00000026921	3.06433855536817	6.21283786733451	2.78817757693241	2.22827911634307	0.0258619080654661	0.0627053690591834	18.386031332209	0	0	0	0	0	Egfl7	EGF-like domain 7 [Source:MGI Symbol;Acc:MGI:2449923]
ENSMUSG00000027763	3.06433855536817	6.21283786733451	2.78817757693241	2.22827911634307	0.0258619080654661	0.0627053690591834	18.386031332209	0	0	0	0	0	Mbnl1	muscleblind like splicing regulator 1 [Source:MGI Symbol;Acc:MGI:1928482]
ENSMUSG00000053414	3.06433855536817	6.21283786733451	2.78817757693241	2.22827911634307	0.0258619080654661	0.0627053690591834	18.386031332209	0	0	0	0	0	Hunk	hormonally upregulated Neu-associated kinase [Source:MGI Symbol;Acc:MGI:1347352]
ENSMUSG00000025789	3.04777739234636	6.20570931202995	2.51652513714305	2.46598343900317	0.0136637651504369	0.0359576911679325	0	11.8654952953913	6.42116905868684	0	0	0	St8sia2	ST8 alpha-N-acetyl-neuraminide alpha-2,8-sialyltransferase 2 [Source:MGI Symbol;Acc:MGI:106020]
ENSMUSG00000045435	33.0124973439868	6.20433315405874	0.800828949511371	7.74738869997686	9.38014880337995e-15	8.20977555718765e-14	102.144618512272	35.5964858861739	57.7905215281816	2.0943351853235	0.449022951969339	0	Tmem60	transmembrane protein 60 [Source:MGI Symbol;Acc:MGI:2673965]
ENSMUSG00000058624	3.04241280985137	6.20380348948564	2.30895585550775	2.68684369806689	0.00721306969562897	0.0203167410886666	4.08578474049089	9.88791274615941	4.28077937245789	0	0	0	Gda	guanine deaminase [Source:MGI Symbol;Acc:MGI:95678]
ENSMUSG00000048351	3.04256861503031	6.20358119809761	2.53535792477527	2.44682659496587	0.014412015891048	0.0376717615882648	14.3002465917181	3.95516509846377	0	0	0	0	Coa7	cytochrome c oxidase assembly factor 7 [Source:MGI Symbol;Acc:MGI:1917143]
ENSMUSG00000049882	3.04256861503031	6.20358119809761	2.53535792477527	2.44682659496587	0.014412015891048	0.0376717615882648	14.3002465917181	3.95516509846377	0	0	0	0	Vcpkmt	valosin containing protein lysine (K) methyltransferase [Source:MGI Symbol;Acc:MGI:2684917]
ENSMUSG00000046982	3.03168364486139	6.19889145495573	2.52115121694873	2.45875432353401	0.0139419988439669	0.0365793003252259	12.2573542214727	5.93274764769565	0	0	0	0	Tshz1	teashirt zinc finger family member 1 [Source:MGI Symbol;Acc:MGI:1346031]
ENSMUSG00000047409	3.03168364486139	6.19889145495573	2.52115121694873	2.45875432353401	0.0139419988439669	0.0365793003252259	12.2573542214727	5.93274764769565	0	0	0	0	Ctdspl	CTD small phosphatase like [Source:MGI Symbol;Acc:MGI:1916524]
ENSMUSG00000027801	3.02079867469246	6.19417754178263	2.5170241999356	2.4609129868283	0.0138583971914948	0.0364159910988001	10.2144618512272	7.91033019692753	0	0	0	0	Tm4sf4	transmembrane 4 superfamily member 4 [Source:MGI Symbol;Acc:MGI:2385173]
ENSMUSG00000063838	3.02064286951351	6.19395127254969	2.54165417477496	2.4369764124571	0.0148106454240148	0.0385275041076076	0	13.8430778446232	4.28077937245789	0	0	0	Cdc42ep5	CDC42 effector protein 5 [Source:MGI Symbol;Acc:MGI:1929745]
ENSMUSG00000021376	10.8890934750532	6.19320052829638	1.41125	4.38844787399327	1.14162488723299e-05	5.15170376365121e-05	8.17156948098178	17.7982429430869	38.527014352121	0.837734074129399	0	0	Tpmt	thiopurine methyltransferase [Source:MGI Symbol;Acc:MGI:98812]
ENSMUSG00000023903	3.00991370452353	6.18943361712392	2.52018932856813	2.45593993552878	0.014051664140103	0.0368227026781419	8.17156948098178	9.88791274615941	0	0	0	0	Mmp25	matrix metallopeptidase 25 [Source:MGI Symbol;Acc:MGI:2443938]
ENSMUSG00000027871	2.9990287343546	6.18464996094725	2.53063908184006	2.44390834130733	0.0145291172694283	0.0379379868737939	6.12867711073633	11.8654952953913	0	0	0	0	Hsd3b1	hydroxy-delta-5-steroid dehydrogenase, 3 beta- and steroid delta-isomerase 1 [Source:MGI Symbol;Acc:MGI:96233]
ENSMUSG00000048920	2.99350834668067	6.18198945020593	2.58834876085617	2.3883912182534	0.0169223172252181	0.0432695023293664	0	15.8206603938551	2.14038968622895	0	0	0	Fkrp	fukutin related protein [Source:MGI Symbol;Acc:MGI:2447586]
ENSMUSG00000078998	2.98814376418568	6.17980752001599	2.55115018745277	2.42236131389282	0.015420010353234	0.0398874103084799	4.08578474049089	13.8430778446232	0	0	0	0	Bpifa6	BPI fold containing family A, member 6 [Source:MGI Symbol;Acc:MGI:3647736]
ENSMUSG00000026616	2.97725879401675	6.17485061608297	2.59314870422834	2.38121732317718	0.0172555285928273	0.0440490576988902	2.04289237024544	15.8206603938551	0	0	0	0	Cr2	complement receptor 2 [Source:MGI Symbol;Acc:MGI:88489]
ENSMUSG00000000247	2.96637382384782	6.16919337490926	2.82146636336874	2.18652026301084	0.0287775638732569	0.0687752809169285	0	17.7982429430869	0	0	0	0	Lhx2	LIM homeobox protein 2 [Source:MGI Symbol;Acc:MGI:96785]
ENSMUSG00000009185	2.96637382384782	6.16919337490926	2.82146636336874	2.18652026301084	0.0287775638732569	0.0687752809169285	0	17.7982429430869	0	0	0	0	Ccl8	C-C motif chemokine ligand 8 [Source:MGI Symbol;Acc:MGI:101878]
ENSMUSG00000022971	2.96637382384782	6.16919337490926	2.82146636336874	2.18652026301084	0.0287775638732569	0.0687752809169285	0	17.7982429430869	0	0	0	0	Ifnar2	interferon (alpha and beta) receptor 2 [Source:MGI Symbol;Acc:MGI:1098243]
ENSMUSG00000026826	2.96637382384782	6.16919337490926	2.82146636336874	2.18652026301084	0.0287775638732569	0.0687752809169285	0	17.7982429430869	0	0	0	0	Nr4a2	nuclear receptor subfamily 4, group A, member 2 [Source:MGI Symbol;Acc:MGI:1352456]
ENSMUSG00000022245	5.78810393681485	6.14671420882008	3.92271693180302	1.56695329173162	0.11712560971454	0.215870066392966	0	0	34.2462349796631	0	0	0.482388641225955	Skor1	SKI family transcriptional corepressor 1 [Source:MGI Symbol;Acc:MGI:2443473]
ENSMUSG00000020804	2.85385291497193	6.1053404773575	2.86761077042374	2.12906874961114	0.0332485728153516	0.0774948463464258	0	0	17.1231174898316	0	0	0	Aanat	arylalkylamine N-acetyltransferase [Source:MGI Symbol;Acc:MGI:1328365]
ENSMUSG00000032419	2.85385291497193	6.1053404773575	2.86761077042374	2.12906874961114	0.0332485728153516	0.0774948463464258	0	0	17.1231174898316	0	0	0	Tbx18	T-box18 [Source:MGI Symbol;Acc:MGI:1923615]
ENSMUSG00000041801	2.85385291497193	6.1053404773575	2.86761077042374	2.12906874961114	0.0332485728153516	0.0774948463464258	0	0	17.1231174898316	0	0	0	Phlda3	pleckstrin homology like domain, family A, member 3 [Source:MGI Symbol;Acc:MGI:1351485]
ENSMUSG00000070056	2.85385291497193	6.1053404773575	2.86761077042374	2.12906874961114	0.0332485728153516	0.0774948463464258	0	0	17.1231174898316	0	0	0	Mfhas1	malignant fibrous histiocytoma amplified sequence 1 [Source:MGI Symbol;Acc:MGI:1098644]
ENSMUSG00000031239	2.83760336230801	6.09687892333165	2.64306493637547	2.30674579327306	0.0210689957507076	0.0524384831201822	2.04289237024544	0	14.9827278036026	0	0	0	Itm2a	integral membrane protein 2A [Source:MGI Symbol;Acc:MGI:107706]
ENSMUSG00000024247	2.8213538096441	6.08917618539054	2.61108874899095	2.3320448942012	0.0196983295271994	0.0494668088452229	4.08578474049089	0	12.8423381173737	0	0	0	Pkdcc	protein kinase domain containing, cytoplasmic [Source:MGI Symbol;Acc:MGI:2147077]
ENSMUSG00000026414	2.78885470431626	6.07392190096784	2.60210970279523	2.33422975766285	0.0195836945169736	0.0492244156644301	8.17156948098178	0	8.56155874491579	0	0	0	Tnnt2	troponin T2, cardiac [Source:MGI Symbol;Acc:MGI:104597]
ENSMUSG00000059878	2.77796973414733	6.06835383800084	2.41266039487462	2.51521260550895	0.0118960621992625	0.0318106483707219	6.12867711073633	1.97758254923188	8.56155874491579	0	0	0	Zfp422	zinc finger protein 422 [Source:MGI Symbol;Acc:MGI:1914505]
ENSMUSG00000039976	2.77260515165234	6.06627741211262	2.61189139884713	2.32256111980392	0.020202741436075	0.0505251347758827	10.2144618512272	0	6.42116905868684	0	0	0	Tbc1d16	TBC1 domain family, member 16 [Source:MGI Symbol;Acc:MGI:2652878]
ENSMUSG00000067288	2.77260515165234	6.06627741211262	2.61189139884713	2.32256111980392	0.020202741436075	0.0505251347758827	10.2144618512272	0	6.42116905868684	0	0	0	Rps28	ribosomal protein S28 [Source:MGI Symbol;Acc:MGI:1859516]
ENSMUSG00000039058	2.75635559898843	6.05859460131365	2.63252689376843	2.30143692573672	0.0213669467474113	0.053052648572081	12.2573542214727	0	4.28077937245789	0	0	0	Ak5	adenylate kinase 5 [Source:MGI Symbol;Acc:MGI:2677491]
ENSMUSG00000034910	2.75083521131449	6.05570902609484	2.3906149063791	2.53311773884444	0.0113052972520844	0.0304028520397006	6.12867711073633	3.95516509846377	6.42116905868684	0	0	0	Pygo1	pygopus 1 [Source:MGI Symbol;Acc:MGI:1919385]
ENSMUSG00000020044	2.7454706288195	6.05328799667033	2.43502952883055	2.48591974963748	0.0129217100792921	0.0342003209738573	10.2144618512272	1.97758254923188	4.28077937245789	0	0	0	Timp3	tissue inhibitor of metalloproteinase 3 [Source:MGI Symbol;Acc:MGI:98754]
ENSMUSG00000038770	2.74531482364055	6.05317960250608	2.61667469714138	2.31330994606205	0.0207056042447971	0.0516270248581679	0	7.91033019692753	8.56155874491579	0	0	0	Kpna7	karyopherin subunit alpha 7 [Source:MGI Symbol;Acc:MGI:2141165]
ENSMUSG00000001482	2.74010604632451	6.05085070751793	2.67521021372778	2.26182252013996	0.0237083708867087	0.0581579898852064	14.3002465917181	0	2.14038968622895	0	0	0	Def8	differentially expressed in FDCP 8 [Source:MGI Symbol;Acc:MGI:1346331]
ENSMUSG00000026393	2.74010604632451	6.05085070751793	2.67521021372778	2.26182252013996	0.0237083708867087	0.0581579898852064	14.3002465917181	0	2.14038968622895	0	0	0	Nek7	NIMA (never in mitosis gene a)-related expressed kinase 7 [Source:MGI Symbol;Acc:MGI:1890645]
ENSMUSG00000041037	2.73458565865057	6.04815581890858	2.40385674274583	2.51602173763483	0.0118687862280435	0.0317445364125111	8.17156948098178	3.95516509846377	4.28077937245789	0	0	0	Irgq	immunity-related GTPase family, Q [Source:MGI Symbol;Acc:MGI:2667176]
ENSMUSG00000004542	2.72385649366059	6.04291351855564	2.91765055703674	2.07115739202608	0.0383440899197664	0.0873256631261921	16.3431389619636	0	0	0	0	0	Psg19	pregnancy specific beta-1-glycoprotein 19 [Source:MGI Symbol;Acc:MGI:1347252]
ENSMUSG00000024639	2.72385649366059	6.04291351855564	2.91765055703674	2.07115739202608	0.0383440899197664	0.0873256631261921	16.3431389619636	0	0	0	0	0	Gnaq	guanine nucleotide binding protein, alpha q polypeptide [Source:MGI Symbol;Acc:MGI:95776]
ENSMUSG00000027863	2.72385649366059	6.04291351855564	2.91765055703674	2.07115739202608	0.0383440899197664	0.0873256631261921	16.3431389619636	0	0	0	0	0	Cd2	CD2 antigen [Source:MGI Symbol;Acc:MGI:88320]
ENSMUSG00000033615	2.72385649366059	6.04291351855564	2.91765055703674	2.07115739202608	0.0383440899197664	0.0873256631261921	16.3431389619636	0	0	0	0	0	Cplx1	complexin 1 [Source:MGI Symbol;Acc:MGI:104727]
ENSMUSG00000041669	2.72385649366059	6.04291351855564	2.91765055703674	2.07115739202608	0.0383440899197664	0.0873256631261921	16.3431389619636	0	0	0	0	0	Prima1	proline rich membrane anchor 1 [Source:MGI Symbol;Acc:MGI:1926097]
ENSMUSG00000052819	2.72385649366059	6.04291351855564	2.91765055703674	2.07115739202608	0.0383440899197664	0.0873256631261921	16.3431389619636	0	0	0	0	0	Best2	bestrophin 2 [Source:MGI Symbol;Acc:MGI:2387588]
ENSMUSG00000051650	2.71818030080771	6.04015347719818	2.63032765620757	2.29635021437098	0.0216558651335602	0.0536842724070338	0	9.88791274615941	6.42116905868684	0	0	0	B3gnt2	UDP-GlcNAc:betaGal beta-1,3-N-acetylglucosaminyltransferase 2 [Source:MGI Symbol;Acc:MGI:1889505]
ENSMUSG00000024777	2.71281571831272	6.03787240271145	2.4101695810666	2.50516496853281	0.0122394291943235	0.0326026517219536	4.08578474049089	7.91033019692753	4.28077937245789	0	0	0	Ppp2r5b	protein phosphatase 2, regulatory subunit B', beta [Source:MGI Symbol;Acc:MGI:2388480]
ENSMUSG00000031603	2.71297152349167	6.03774177901207	2.68448952637189	2.24912100408607	0.0245047985648719	0.0598478892744672	14.3002465917181	1.97758254923188	0	0	0	0	Fgf20	fibroblast growth factor 20 [Source:MGI Symbol;Acc:MGI:1891346]
ENSMUSG00000000159	2.70208655332274	6.03248344989967	2.65107156067183	2.27548872666829	0.0228766281887734	0.0564239157356964	12.2573542214727	3.95516509846377	0	0	0	0	Igsf5	immunoglobulin superfamily, member 5 [Source:MGI Symbol;Acc:MGI:1919308]
ENSMUSG00000029272	2.70208655332274	6.03248344989967	2.65107156067183	2.27548872666829	0.0228766281887734	0.0564239157356964	12.2573542214727	3.95516509846377	0	0	0	0	Sult1e1	sulfotransferase family 1E, member 1 [Source:MGI Symbol;Acc:MGI:98431]
ENSMUSG00000038280	2.69120158315381	6.02719693011322	2.63970881660475	2.28328097864428	0.0224138227295466	0.0554306449169559	10.2144618512272	5.93274764769565	0	0	0	0	Ostm1	osteopetrosis associated transmembrane protein 1 [Source:MGI Symbol;Acc:MGI:2655574]
ENSMUSG00000050953	20.2672830146032	6.02416017835299	1.04635123767315	5.75730210034384	8.54688753936628e-09	5.10310323221788e-08	12.2573542214727	73.1705543215797	34.2462349796631	0	0	1.92955456490382	Gja1	gap junction protein, alpha 1 [Source:MGI Symbol;Acc:MGI:95713]
ENSMUSG00000074115	2.68031661298488	6.02187772424586	2.6390827852295	2.28180705734177	0.0225007339473248	0.0556124062207629	8.17156948098178	7.91033019692753	0	0	0	0	Saa1	serum amyloid A 1 [Source:MGI Symbol;Acc:MGI:98221]
ENSMUSG00000015619	2.66391125514202	6.0135830199303	2.70164654010161	2.22589555319998	0.0260211783007384	0.0630234458668516	0	13.8430778446232	2.14038968622895	0	0	0	Gata3	GATA binding protein 3 [Source:MGI Symbol;Acc:MGI:95663]
ENSMUSG00000032180	2.66391125514202	6.0135830199303	2.70164654010161	2.22589555319998	0.0260211783007384	0.0630234458668516	0	13.8430778446232	2.14038968622895	0	0	0	Tmed1	transmembrane p24 trafficking protein 1 [Source:MGI Symbol;Acc:MGI:106201]
ENSMUSG00000079557	39.1310153293326	6.0018702070194	0.678890643564548	8.84070249592231	9.51186257328846e-19	1.00851692092062e-17	91.930156661045	77.1257194200434	62.0713009006395	0	2.69413771181604	0.964777282451911	Marchf2	membrane associated ring-CH-type finger 2 [Source:MGI Symbol;Acc:MGI:1925915]
ENSMUSG00000017897	2.63677673230918	5.99929449968104	2.95334711769447	2.03135434495231	0.0422190622093634	0.0945996904305763	0	15.8206603938551	0	0	0	0	Eya2	EYA transcriptional coactivator and phosphatase 2 [Source:MGI Symbol;Acc:MGI:109341]
ENSMUSG00000021207	2.63677673230918	5.99929449968104	2.95334711769447	2.03135434495231	0.0422190622093634	0.0945996904305763	0	15.8206603938551	0	0	0	0	Akr1c21	aldo-keto reductase family 1, member C21 [Source:MGI Symbol;Acc:MGI:1924587]
ENSMUSG00000031790	2.63677673230918	5.99929449968104	2.95334711769447	2.03135434495231	0.0422190622093634	0.0945996904305763	0	15.8206603938551	0	0	0	0	Mmp15	matrix metallopeptidase 15 [Source:MGI Symbol;Acc:MGI:109320]
ENSMUSG00000034463	2.63677673230918	5.99929449968104	2.95334711769447	2.03135434495231	0.0422190622093634	0.0945996904305763	0	15.8206603938551	0	0	0	0	Scara3	scavenger receptor class A, member 3 [Source:MGI Symbol;Acc:MGI:2444418]
ENSMUSG00000035615	2.63677673230918	5.99929449968104	2.95334711769447	2.03135434495231	0.0422190622093634	0.0945996904305763	0	15.8206603938551	0	0	0	0	Frmpd1	FERM and PDZ domain containing 1 [Source:MGI Symbol;Acc:MGI:2446274]
ENSMUSG00000060131	2.63677673230918	5.99929449968104	2.95334711769447	2.03135434495231	0.0422190622093634	0.0945996904305763	0	15.8206603938551	0	0	0	0	Atp8b4	ATPase, class I, type 8B, member 4 [Source:MGI Symbol;Acc:MGI:1859664]
ENSMUSG00000015668	9.43534410509228	5.98725919913115	1.45078051246377	4.12692281685212	3.67649719040408e-05	0.000155156415191909	28.6004931834362	7.91033019692753	19.2635071760605	0.837734074129399	0	0	Pdzd11	PDZ domain containing 11 [Source:MGI Symbol;Acc:MGI:1919871]
ENSMUSG00000045382	5.04214160274404	5.94086674392578	2.06040164243904	2.88335372170115	0.00393465341361622	0.0118430020583603	4.08578474049089	0	25.6846762347474	0	0	0.482388641225955	Cxcr4	C-X-C motif chemokine receptor 4 [Source:MGI Symbol;Acc:MGI:109563]
ENSMUSG00000021944	9.0024176995383	5.9197389803976	1.44125214528458	4.10735831323167	4.00210126842507e-05	0.000168099066110782	14.3002465917181	21.7534080415507	17.1231174898316	0.837734074129399	0	0	Gata4	GATA binding protein 4 [Source:MGI Symbol;Acc:MGI:95664]
ENSMUSG00000048644	22.4412797459585	5.91668880162471	0.916837746271825	6.45336519540561	1.0939331264332e-10	7.50427263841686e-10	59.2438787371179	45.4843986323333	27.8250659209763	2.0943351853235	0	0	Ctxn1	cortexin 1 [Source:MGI Symbol;Acc:MGI:88566]
ENSMUSG00000003279	2.49712130060044	5.91265169373501	3.02093248073348	1.95722735660065	0.0503207438387382	0.109777072640306	0	0	14.9827278036026	0	0	0	Dlgap1	DLG associated protein 1 [Source:MGI Symbol;Acc:MGI:1346065]
ENSMUSG00000026492	2.49712130060044	5.91265169373501	3.02093248073348	1.95722735660065	0.0503207438387382	0.109777072640306	0	0	14.9827278036026	0	0	0	Tfb2m	transcription factor B2, mitochondrial [Source:MGI Symbol;Acc:MGI:107937]
ENSMUSG00000029212	2.49712130060044	5.91265169373501	3.02093248073348	1.95722735660065	0.0503207438387382	0.109777072640306	0	0	14.9827278036026	0	0	0	Gabrb1	gamma-aminobutyric acid type A receptor subunit beta 1 [Source:MGI Symbol;Acc:MGI:95619]
ENSMUSG00000030806	2.49712130060044	5.91265169373501	3.02093248073348	1.95722735660065	0.0503207438387382	0.109777072640306	0	0	14.9827278036026	0	0	0	Stx1b	syntaxin 1B [Source:MGI Symbol;Acc:MGI:1930705]
ENSMUSG00000045038	2.49712130060044	5.91265169373501	3.02093248073348	1.95722735660065	0.0503207438387382	0.109777072640306	0	0	14.9827278036026	0	0	0	Prkce	protein kinase C, epsilon [Source:MGI Symbol;Acc:MGI:97599]
ENSMUSG00000059336	2.49712130060044	5.91265169373501	3.02093248073348	1.95722735660065	0.0503207438387382	0.109777072640306	0	0	14.9827278036026	0	0	0	Slc14a1	solute carrier family 14 (urea transporter), member 1 [Source:MGI Symbol;Acc:MGI:1351654]
ENSMUSG00000074596	2.49712130060044	5.91265169373501	3.02093248073348	1.95722735660065	0.0503207438387382	0.109777072640306	0	0	14.9827278036026	0	0	0	Spint3	serine peptidase inhibitor, Kunitz type, 3 [Source:MGI Symbol;Acc:MGI:3651470]
ENSMUSG00000039089	2.48087174793652	5.90310264162664	2.7782512473485	2.12475478856004	0.033607079154192	0.078154682767518	2.04289237024544	0	12.8423381173737	0	0	0	L3mbtl3	L3MBTL3 histone methyl-lysine binding protein [Source:MGI Symbol;Acc:MGI:2143628]
ENSMUSG00000001095	2.4646221952726	5.89434041456473	2.74972754949637	2.14360888795849	0.0320642380302414	0.0752846759263946	4.08578474049089	0	10.7019484311447	0	0	0	Slc13a2	solute carrier family 13 (sodium-dependent dicarboxylate transporter), member 2 [Source:MGI Symbol;Acc:MGI:1276558]
ENSMUSG00000028927	2.44837264260869	5.88563174687482	2.74401412167653	2.14489849027411	0.0319609639814927	0.0751130969459231	6.12867711073633	0	8.56155874491579	0	0	0	Padi2	peptidyl arginine deiminase, type II [Source:MGI Symbol;Acc:MGI:1338892]
ENSMUSG00000025795	2.44285225493475	5.88261698017735	2.7585527608795	2.13250116640938	0.03296566870302	0.0769990655808233	0	3.95516509846377	10.7019484311447	0	0	0	Rassf3	Ras association (RalGDS/AF-6) domain family member 3 [Source:MGI Symbol;Acc:MGI:2179722]
ENSMUSG00000021998	2.43212308994477	5.8769090626918	2.75067874606623	2.13653050945932	0.0326361969087779	0.0764145312207081	8.17156948098178	0	6.42116905868684	0	0	0	Lcp1	lymphocyte cytosolic protein 1 [Source:MGI Symbol;Acc:MGI:104808]
ENSMUSG00000066637	2.43212308994477	5.8769090626918	2.75067874606623	2.13653050945932	0.0326361969087779	0.0764145312207081	8.17156948098178	0	6.42116905868684	0	0	0	Ttc32	tetratricopeptide repeat domain 32 [Source:MGI Symbol;Acc:MGI:1922766]
ENSMUSG00000042351	2.41587353728085	5.86814478751474	2.76968221257263	2.11870689022626	0.0341152456871101	0.0791305295882252	10.2144618512272	0	4.28077937245789	0	0	0	Grap2	GRB2-related adaptor protein 2 [Source:MGI Symbol;Acc:MGI:1333842]
ENSMUSG00000030108	2.41571773210191	5.86792159167442	2.75747176714808	2.12800785907713	0.0333364319788114	0.0776414240675052	0	5.93274764769565	8.56155874491579	0	0	0	Slc6a13	solute carrier family 6 (neurotransmitter transporter, GABA), member 13 [Source:MGI Symbol;Acc:MGI:95629]
ENSMUSG00000060275	2.41571773210191	5.86792159167442	2.75747176714808	2.12800785907713	0.0333364319788114	0.0776414240675052	0	5.93274764769565	8.56155874491579	0	0	0	Nrg2	neuregulin 2 [Source:MGI Symbol;Acc:MGI:1098246]
ENSMUSG00000006218	2.39962398461694	5.85931263943564	2.81145218102444	2.08408760390177	0.0371521994129291	0.0852002082468192	12.2573542214727	0	2.14038968622895	0	0	0	Fam131c	family with sequence similarity 131, member C [Source:MGI Symbol;Acc:MGI:2685539]
ENSMUSG00000071064	2.39946817943799	5.85902271168012	2.55053863333415	2.29717073684197	0.0216090317757274	0.0535895370278607	2.04289237024544	5.93274764769565	6.42116905868684	0	0	0	Zfp827	zinc finger protein 827 [Source:MGI Symbol;Acc:MGI:2444807]
ENSMUSG00000108976	2.38858320926906	5.85310308763689	2.76888624508819	2.11388355083922	0.0345252144936856	0.0799609111094912	0	7.91033019692753	6.42116905868684	0	0	0	Gm29797	predicted gene, 29797 [Source:MGI Symbol;Acc:MGI:5588956]
ENSMUSG00000002831	2.38337443195302	5.85026880377769	3.07499190426184	1.90253144916232	0.0571017114224677	0.121646794272222	14.3002465917181	0	0	0	0	0	Plin4	perilipin 4 [Source:MGI Symbol;Acc:MGI:1929709]
ENSMUSG00000020383	2.38337443195302	5.85026880377769	3.07499190426184	1.90253144916232	0.0571017114224677	0.121646794272222	14.3002465917181	0	0	0	0	0	Il13	interleukin 13 [Source:MGI Symbol;Acc:MGI:96541]
ENSMUSG00000021071	2.38337443195302	5.85026880377769	3.07499190426184	1.90253144916232	0.0571017114224677	0.121646794272222	14.3002465917181	0	0	0	0	0	Trim9	tripartite motif-containing 9 [Source:MGI Symbol;Acc:MGI:2137354]
ENSMUSG00000021798	2.38337443195302	5.85026880377769	3.07499190426184	1.90253144916232	0.0571017114224677	0.121646794272222	14.3002465917181	0	0	0	0	0	Ldb3	LIM domain binding 3 [Source:MGI Symbol;Acc:MGI:1344412]
ENSMUSG00000022831	2.38337443195302	5.85026880377769	3.07499190426184	1.90253144916232	0.0571017114224677	0.121646794272222	14.3002465917181	0	0	0	0	0	Hcls1	hematopoietic cell specific Lyn substrate 1 [Source:MGI Symbol;Acc:MGI:104568]
ENSMUSG00000023341	2.38337443195302	5.85026880377769	3.07499190426184	1.90253144916232	0.0571017114224677	0.121646794272222	14.3002465917181	0	0	0	0	0	Mx2	MX dynamin-like GTPase 2 [Source:MGI Symbol;Acc:MGI:97244]
ENSMUSG00000034796	2.38337443195302	5.85026880377769	3.07499190426184	1.90253144916232	0.0571017114224677	0.121646794272222	14.3002465917181	0	0	0	0	0	Cpne7	copine VII [Source:MGI Symbol;Acc:MGI:2142747]
ENSMUSG00000029344	2.37248946178409	5.84434789281188	2.82294472538835	2.07030192275829	0.0384240796504675	0.0874597874474494	12.2573542214727	1.97758254923188	0	0	0	0	Tpst2	protein-tyrosine sulfotransferase 2 [Source:MGI Symbol;Acc:MGI:1309516]
ENSMUSG00000040972	2.36144868643622	5.8381131974284	2.79273273548808	2.09046613134217	0.0365759477283249	0.0841152111496258	0	9.88791274615941	4.28077937245789	0	0	0	Igsf21	immunoglobulin superfamily, member 21 [Source:MGI Symbol;Acc:MGI:2681842]
ENSMUSG00000022265	2.35071952144624	5.83227355090522	2.78476442801723	2.09435077963052	0.0362287439284084	0.0834401644884472	8.17156948098178	5.93274764769565	0	0	0	0	Ank	progressive ankylosis [Source:MGI Symbol;Acc:MGI:3045421]
ENSMUSG00000053886	2.35071952144624	5.83227355090522	2.78476442801723	2.09435077963052	0.0362287439284084	0.0834401644884472	8.17156948098178	5.93274764769565	0	0	0	0	Sh2d4a	SH2 domain containing 4A [Source:MGI Symbol;Acc:MGI:1919531]
ENSMUSG00000027296	2.3451991337723	5.82956314102167	2.61191991812684	2.23190730334581	0.0256210900998749	0.0621876458962031	2.04289237024544	9.88791274615941	2.14038968622895	0	0	0	Itpka	inositol 1,4,5-trisphosphate 3-kinase A [Source:MGI Symbol;Acc:MGI:1333822]
ENSMUSG00000029545	2.33983455127731	5.82617324336792	2.78954152257355	2.08857735087337	0.0367457857619661	0.0843965535589238	6.12867711073633	7.91033019692753	0	0	0	0	Acads	acyl-Coenzyme A dehydrogenase, short chain [Source:MGI Symbol;Acc:MGI:87868]
ENSMUSG00000068015	2.33983455127731	5.82617324336792	2.78954152257355	2.08857735087337	0.0367457857619661	0.0843965535589238	6.12867711073633	7.91033019692753	0	0	0	0	Lrch1	leucine-rich repeats and calponin homology (CH) domain containing 1 [Source:MGI Symbol;Acc:MGI:2443390]
ENSMUSG00000063849	4.64232394901783	5.82384011960252	2.07628728017197	2.80492982604997	0.00503275354297299	0.0147553879806589	8.17156948098178	0	19.2635071760605	0.418867037064699	0	0	Ppcdc	phosphopantothenoylcysteine decarboxylase [Source:MGI Symbol;Acc:MGI:1914062]
ENSMUSG00000004043	2.33431416360337	5.82287812730642	2.83946639217168	2.05069450491117	0.0402967064460133	0.0911715732343218	0	11.8654952953913	2.14038968622895	0	0	0	Stat5a	signal transducer and activator of transcription 5A [Source:MGI Symbol;Acc:MGI:103036]
ENSMUSG00000060913	2.33431416360337	5.82287812730642	2.83946639217168	2.05069450491117	0.0402967064460133	0.0911715732343218	0	11.8654952953913	2.14038968622895	0	0	0	Trim55	tripartite motif-containing 55 [Source:MGI Symbol;Acc:MGI:3036269]
ENSMUSG00000059772	2.31806461093946	5.81373291313292	2.84663753359519	2.04231583562042	0.041120212294901	0.0926974950719021	2.04289237024544	11.8654952953913	0	0	0	0	Slx1b	SLX1 structure-specific endonuclease subunit homolog B (S. cerevisiae) [Source:MGI Symbol;Acc:MGI:1915220]
ENSMUSG00000017667	2.30717964077053	5.80667830917416	3.11352592602091	1.86498473022034	0.0621835445944537	0.130022989932956	0	13.8430778446232	0	0	0	0	Zfp334	zinc finger protein 334 [Source:MGI Symbol;Acc:MGI:2388656]
ENSMUSG00000023828	2.30717964077053	5.80667830917416	3.11352592602091	1.86498473022034	0.0621835445944537	0.130022989932956	0	13.8430778446232	0	0	0	0	Slc22a3	solute carrier family 22 (organic cation transporter), member 3 [Source:MGI Symbol;Acc:MGI:1333817]
ENSMUSG00000025085	2.30717964077053	5.80667830917416	3.11352592602091	1.86498473022034	0.0621835445944537	0.130022989932956	0	13.8430778446232	0	0	0	0	Ablim1	actin-binding LIM protein 1 [Source:MGI Symbol;Acc:MGI:1194500]
ENSMUSG00000026185	2.30717964077053	5.80667830917416	3.11352592602091	1.86498473022034	0.0621835445944537	0.130022989932956	0	13.8430778446232	0	0	0	0	Igfbp5	insulin-like growth factor binding protein 5 [Source:MGI Symbol;Acc:MGI:96440]
ENSMUSG00000032015	2.30717964077053	5.80667830917416	3.11352592602091	1.86498473022034	0.0621835445944537	0.130022989932956	0	13.8430778446232	0	0	0	0	Pou2f3	POU domain, class 2, transcription factor 3 [Source:MGI Symbol;Acc:MGI:102565]
ENSMUSG00000034936	2.30717964077053	5.80667830917416	3.11352592602091	1.86498473022034	0.0621835445944537	0.130022989932956	0	13.8430778446232	0	0	0	0	Arl4d	ADP-ribosylation factor-like 4D [Source:MGI Symbol;Acc:MGI:1933155]
ENSMUSG00000038679	2.30717964077053	5.80667830917416	3.11352592602091	1.86498473022034	0.0621835445944537	0.130022989932956	0	13.8430778446232	0	0	0	0	Trps1	transcriptional repressor GATA binding 1 [Source:MGI Symbol;Acc:MGI:1927616]
ENSMUSG00000047963	2.30717964077053	5.80667830917416	3.11352592602091	1.86498473022034	0.0621835445944537	0.130022989932956	0	13.8430778446232	0	0	0	0	Stbd1	starch binding domain 1 [Source:MGI Symbol;Acc:MGI:1261768]
ENSMUSG00000062070	2.30717964077053	5.80667830917416	3.11352592602091	1.86498473022034	0.0621835445944537	0.130022989932956	0	13.8430778446232	0	0	0	0	Pgk1	phosphoglycerate kinase 1 [Source:MGI Symbol;Acc:MGI:97555]
ENSMUSG00000018263	4.5123275277065	5.78652283131975	2.16520035420119	2.67251149303205	0.00752857955199017	0.0211027594969803	24.5147084429453	0	2.14038968622895	0.418867037064699	0	0	Tbx5	T-box 5 [Source:MGI Symbol;Acc:MGI:102541]
ENSMUSG00000027692	16.3787756869002	5.78180199651276	1.04256253063008	5.54576039963615	2.92679391469289e-08	1.67205034069984e-07	42.9007397751543	23.7309905907826	29.9654556072053	1.6754681482588	0	0	Tnik	TRAF2 and NCK interacting kinase [Source:MGI Symbol;Acc:MGI:1916264]
ENSMUSG00000028488	12.5140190688548	5.73954985242729	1.18625832999463	4.83836421401844	1.30912085467682e-06	6.50221089042156e-06	20.4289237024544	29.6637382384782	23.5442865485184	0	0	1.44716592367787	Sh3gl2	SH3-domain GRB2-like 2 [Source:MGI Symbol;Acc:MGI:700009]
ENSMUSG00000026473	474.466052652272	5.71833462803418	0.198822969195464	28.7609356764633	6.61117722243429e-182	5.20400070350729e-180	976.502552977322	929.463798138985	888.261719785013	26.3886233350761	11.2255737992335	14.9540478780046	Glul	glutamate-ammonia ligase [Source:MGI Symbol;Acc:MGI:95739]
ENSMUSG00000005364	2.14038968622895	5.69021020239941	3.21228260007935	1.77139153393878	0.07649561545214	0.154093937379052	0	0	12.8423381173737	0	0	0	Il5ra	interleukin 5 receptor, alpha [Source:MGI Symbol;Acc:MGI:96558]
ENSMUSG00000021538	2.14038968622895	5.69021020239941	3.21228260007935	1.77139153393878	0.07649561545214	0.154093937379052	0	0	12.8423381173737	0	0	0	Il9	interleukin 9 [Source:MGI Symbol;Acc:MGI:96563]
ENSMUSG00000024065	2.14038968622895	5.69021020239941	3.21228260007935	1.77139153393878	0.07649561545214	0.154093937379052	0	0	12.8423381173737	0	0	0	Ehd3	EH-domain containing 3 [Source:MGI Symbol;Acc:MGI:1928900]
ENSMUSG00000024225	2.14038968622895	5.69021020239941	3.21228260007935	1.77139153393878	0.07649561545214	0.154093937379052	0	0	12.8423381173737	0	0	0	Clps	colipase, pancreatic [Source:MGI Symbol;Acc:MGI:88421]
ENSMUSG00000026697	2.14038968622895	5.69021020239941	3.21228260007935	1.77139153393878	0.07649561545214	0.154093937379052	0	0	12.8423381173737	0	0	0	Myoc	myocilin [Source:MGI Symbol;Acc:MGI:1202864]
ENSMUSG00000027386	2.14038968622895	5.69021020239941	3.21228260007935	1.77139153393878	0.07649561545214	0.154093937379052	0	0	12.8423381173737	0	0	0	Fbln7	fibulin 7 [Source:MGI Symbol;Acc:MGI:1917620]
ENSMUSG00000030717	2.14038968622895	5.69021020239941	3.21228260007935	1.77139153393878	0.07649561545214	0.154093937379052	0	0	12.8423381173737	0	0	0	Nupr1	nuclear protein transcription regulator 1 [Source:MGI Symbol;Acc:MGI:1891834]
ENSMUSG00000034139	2.14038968622895	5.69021020239941	3.21228260007935	1.77139153393878	0.07649561545214	0.154093937379052	0	0	12.8423381173737	0	0	0	Serpini2	serine (or cysteine) peptidase inhibitor, clade I, member 2 [Source:MGI Symbol;Acc:MGI:1915181]
ENSMUSG00000038965	2.14038968622895	5.69021020239941	3.21228260007935	1.77139153393878	0.07649561545214	0.154093937379052	0	0	12.8423381173737	0	0	0	Ube2l3	ubiquitin-conjugating enzyme E2L 3 [Source:MGI Symbol;Acc:MGI:109240]
ENSMUSG00000041261	2.14038968622895	5.69021020239941	3.21228260007935	1.77139153393878	0.07649561545214	0.154093937379052	0	0	12.8423381173737	0	0	0	Car8	carbonic anhydrase 8 [Source:MGI Symbol;Acc:MGI:88253]
ENSMUSG00000042182	2.14038968622895	5.69021020239941	3.21228260007935	1.77139153393878	0.07649561545214	0.154093937379052	0	0	12.8423381173737	0	0	0	Bend6	BEN domain containing 6 [Source:MGI Symbol;Acc:MGI:2444572]
ENSMUSG00000047067	2.14038968622895	5.69021020239941	3.21228260007935	1.77139153393878	0.07649561545214	0.154093937379052	0	0	12.8423381173737	0	0	0	Dusp28	dual specificity phosphatase 28 [Source:MGI Symbol;Acc:MGI:1914696]
ENSMUSG00000048620	2.14038968622895	5.69021020239941	3.21228260007935	1.77139153393878	0.07649561545214	0.154093937379052	0	0	12.8423381173737	0	0	0	Or6z3	olfactory receptor family 6 subfamily Z member 3 [Source:MGI Symbol;Acc:MGI:3031170]
ENSMUSG00000091955	2.14038968622895	5.69021020239941	3.21228260007935	1.77139153393878	0.07649561545214	0.154093937379052	0	0	12.8423381173737	0	0	0	Tmsb10b	thymosin beta 10b [Source:MGI Symbol;Acc:MGI:3704288]
ENSMUSG00000047747	2.12414013356503	5.67921523156847	2.94782805398908	1.92657615286726	0.0540324729419012	0.116427163238961	2.04289237024544	0	10.7019484311447	0	0	0	Rnf150	ring finger protein 150 [Source:MGI Symbol;Acc:MGI:2443860]
ENSMUSG00000116652	2.12414013356503	5.67921523156847	2.94782805398908	1.92657615286726	0.0540324729419012	0.116427163238961	2.04289237024544	0	10.7019484311447	0	0	0	Fam246a	family with sequence similarity 246 member A [Source:MGI Symbol;Acc:MGI:3045365]
ENSMUSG00000017000	2.1132551633961	5.67241062854878	2.95338707010506	1.92064585301614	0.0547763702620171	0.117782454520869	0	1.97758254923188	10.7019484311447	0	0	0	Svs6	seminal vesicle secretory protein 6 [Source:MGI Symbol;Acc:MGI:106178]
ENSMUSG00000026811	2.1132551633961	5.67241062854878	2.95338707010506	1.92064585301614	0.0547763702620171	0.117782454520869	0	1.97758254923188	10.7019484311447	0	0	0	St6galnac6	ST6 (alpha-N-acetyl-neuraminyl-2,3-beta-galactosyl-1,3)-N-acetylgalactosaminide alpha-2,6-sialyltransferase 6 [Source:MGI Symbol;Acc:MGI:1355316]
ENSMUSG00000042659	2.10789058090111	5.66903143211446	2.9237778597083	1.93894054341052	0.0525085783839723	0.113811291279446	4.08578474049089	0	8.56155874491579	0	0	0	Arrdc4	arrestin domain containing 4 [Source:MGI Symbol;Acc:MGI:1913662]
ENSMUSG00000026674	2.0916410282372	5.65887279024463	2.92470130423488	1.93485494811068	0.0530080979893021	0.114594422856414	6.12867711073633	0	6.42116905868684	0	0	0	Ddr2	discoidin domain receptor family, member 2 [Source:MGI Symbol;Acc:MGI:1345277]
ENSMUSG00000029575	2.0916410282372	5.65887279024463	2.92470130423488	1.93485494811068	0.0530080979893021	0.114594422856414	6.12867711073633	0	6.42116905868684	0	0	0	Mmab	methylmalonic aciduria (cobalamin deficiency) cblB type homolog (human) [Source:MGI Symbol;Acc:MGI:1924947]
ENSMUSG00000075467	2.0916410282372	5.65887279024463	2.92470130423488	1.93485494811068	0.0530080979893021	0.114594422856414	6.12867711073633	0	6.42116905868684	0	0	0	Dnlz	DNL-type zinc finger [Source:MGI Symbol;Acc:MGI:106559]
ENSMUSG00000007908	2.07539147557328	5.64867197647571	2.94084795016478	1.92076301536065	0.0547615911265543	0.117782454520869	8.17156948098178	0	4.28077937245789	0	0	0	Hmgcll1	3-hydroxymethyl-3-methylglutaryl-Coenzyme A lyase-like 1 [Source:MGI Symbol;Acc:MGI:2446108]
ENSMUSG00000022217	2.07539147557328	5.64867197647571	2.94084795016478	1.92076301536065	0.0547615911265543	0.117782454520869	8.17156948098178	0	4.28077937245789	0	0	0	Emc9	ER membrane protein complex subunit 9 [Source:MGI Symbol;Acc:MGI:1934682]
ENSMUSG00000040722	2.07539147557328	5.64867197647571	2.94084795016478	1.92076301536065	0.0547615911265543	0.117782454520869	8.17156948098178	0	4.28077937245789	0	0	0	Scamp5	secretory carrier membrane protein 5 [Source:MGI Symbol;Acc:MGI:1928948]
ENSMUSG00000062785	2.07539147557328	5.64867197647571	2.94084795016478	1.92076301536065	0.0547615911265543	0.117782454520869	8.17156948098178	0	4.28077937245789	0	0	0	Kcnc3	potassium voltage gated channel, Shaw-related subfamily, member 3 [Source:MGI Symbol;Acc:MGI:96669]
ENSMUSG00000045322	26.7461671577701	5.64457515054024	1.53545719105644	3.67615273380341	0.000236777796128159	0.000888519572182991	46.9865245156452	37.5740684354058	72.7732493317842	0	3.14316066378538	0	Tlr9	toll-like receptor 9 [Source:MGI Symbol;Acc:MGI:1932389]
ENSMUSG00000058099	2.05914192290936	5.63839252419465	2.98173123843982	1.89097945901553	0.0586270862892291	0.124194357380198	10.2144618512272	0	2.14038968622895	0	0	0	Nfam1	Nfat activating molecule with ITAM motif 1 [Source:MGI Symbol;Acc:MGI:1921289]
ENSMUSG00000015133	2.05898611773041	5.63813287951596	2.94206999104041	1.91638298772155	0.0553163646268654	0.118676837478752	0	5.93274764769565	6.42116905868684	0	0	0	Lrrk1	leucine-rich repeat kinase 1 [Source:MGI Symbol;Acc:MGI:2142227]
ENSMUSG00000025484	2.05898611773041	5.63813287951596	2.94206999104041	1.91638298772155	0.0553163646268654	0.118676837478752	0	5.93274764769565	6.42116905868684	0	0	0	Bet1l	Bet1 golgi vesicular membrane trafficking protein like [Source:MGI Symbol;Acc:MGI:1913128]
ENSMUSG00000055707	2.05898611773041	5.63813287951596	2.94206999104041	1.91638298772155	0.0553163646268654	0.118676837478752	0	5.93274764769565	6.42116905868684	0	0	0	Klhl26	kelch-like 26 [Source:MGI Symbol;Acc:MGI:2443079]
ENSMUSG00000015702	2.04289237024544	5.62787639538453	3.27120077294979	1.72043136022789	0.0853540606096965	0.168366130341443	12.2573542214727	0	0	0	0	0	Anxa9	annexin A9 [Source:MGI Symbol;Acc:MGI:1923711]
ENSMUSG00000020019	2.04289237024544	5.62787639538453	3.27120077294979	1.72043136022789	0.0853540606096965	0.168366130341443	12.2573542214727	0	0	0	0	0	Ntn4	netrin 4 [Source:MGI Symbol;Acc:MGI:1888978]
ENSMUSG00000030339	2.04289237024544	5.62787639538453	3.27120077294979	1.72043136022789	0.0853540606096965	0.168366130341443	12.2573542214727	0	0	0	0	0	Ltbr	lymphotoxin B receptor [Source:MGI Symbol;Acc:MGI:104875]
ENSMUSG00000030484	2.04289237024544	5.62787639538453	3.27120077294979	1.72043136022789	0.0853540606096965	0.168366130341443	12.2573542214727	0	0	0	0	0	Lypd5	Ly6/Plaur domain containing 5 [Source:MGI Symbol;Acc:MGI:1924192]
ENSMUSG00000034115	2.04289237024544	5.62787639538453	3.27120077294979	1.72043136022789	0.0853540606096965	0.168366130341443	12.2573542214727	0	0	0	0	0	Scn11a	sodium channel, voltage-gated, type XI, alpha [Source:MGI Symbol;Acc:MGI:1345149]
ENSMUSG00000044156	2.04289237024544	5.62787639538453	3.27120077294979	1.72043136022789	0.0853540606096965	0.168366130341443	12.2573542214727	0	0	0	0	0	Hepacam2	HEPACAM family member 2 [Source:MGI Symbol;Acc:MGI:2141520]
ENSMUSG00000048721	2.04289237024544	5.62787639538453	3.27120077294979	1.72043136022789	0.0853540606096965	0.168366130341443	12.2573542214727	0	0	0	0	0	Fndc9	fibronectin type III domain containing 9 [Source:MGI Symbol;Acc:MGI:2443410]
ENSMUSG00000049608	2.04289237024544	5.62787639538453	3.27120077294979	1.72043136022789	0.0853540606096965	0.168366130341443	12.2573542214727	0	0	0	0	0	Gpr55	G protein-coupled receptor 55 [Source:MGI Symbol;Acc:MGI:2685064]
ENSMUSG00000062157	2.04289237024544	5.62787639538453	3.27120077294979	1.72043136022789	0.0853540606096965	0.168366130341443	12.2573542214727	0	0	0	0	0	Ifnlr1	interferon lambda receptor 1 [Source:MGI Symbol;Acc:MGI:2429859]
ENSMUSG00000064254	2.04289237024544	5.62787639538453	3.27120077294979	1.72043136022789	0.0853540606096965	0.168366130341443	12.2573542214727	0	0	0	0	0	Ethe1	ethylmalonic encephalopathy 1 [Source:MGI Symbol;Acc:MGI:1913321]
ENSMUSG00000066000	2.04289237024544	5.62787639538453	3.27120077294979	1.72043136022789	0.0853540606096965	0.168366130341443	12.2573542214727	0	0	0	0	0	Zfp979	zinc finger protein 979 [Source:MGI Symbol;Acc:MGI:2148252]
ENSMUSG00000074862	2.04289237024544	5.62787639538453	3.27120077294979	1.72043136022789	0.0853540606096965	0.168366130341443	12.2573542214727	0	0	0	0	0	BC025920	cDNA sequence BC025920 [Source:MGI Symbol;Acc:MGI:2670983]
ENSMUSG00000102053	2.04289237024544	5.62787639538453	3.27120077294979	1.72043136022789	0.0853540606096965	0.168366130341443	12.2573542214727	0	0	0	0	0	Rbmyf1	RNA binding motif protein Y-linked family member 1 [Source:MGI Symbol;Acc:MGI:3782239]
ENSMUSG00000022952	2.03185159489757	5.62073828910943	2.96437626102527	1.89609475794595	0.057947515644321	0.12303537925225	0	7.91033019692753	4.28077937245789	0	0	0	Runx1	runt related transcription factor 1 [Source:MGI Symbol;Acc:MGI:99852]
ENSMUSG00000023000	2.02112242990759	5.61392205654943	2.97030425143433	1.89001583047882	0.058755842909723	0.124415251794378	8.17156948098178	3.95516509846377	0	0	0	0	Dhh	desert hedgehog [Source:MGI Symbol;Acc:MGI:94891]
ENSMUSG00000029707	782.814120350617	5.61270016832772	0.474049736619539	11.8398972402179	2.42750207171334e-32	3.91073099299208e-31	1378.95234991567	1552.40230114703	1671.64434494481	43.143304817664	37.7179279654245	13.0244933131008	Fscn3	fascin actin-bundling protein 3 [Source:MGI Symbol;Acc:MGI:1890386]
ENSMUSG00000028412	1.99935248956974	5.59968325340862	2.98247187453764	1.87753095048942	0.0604453594504731	0.127093649279042	4.08578474049089	7.91033019692753	0	0	0	0	Slc44a1	solute carrier family 44, member 1 [Source:MGI Symbol;Acc:MGI:2140592]
ENSMUSG00000028444	1.99935248956974	5.59968325340862	2.98247187453764	1.87753095048942	0.0604453594504731	0.127093649279042	4.08578474049089	7.91033019692753	0	0	0	0	Cntfr	ciliary neurotrophic factor receptor [Source:MGI Symbol;Acc:MGI:99605]
ENSMUSG00000042073	1.99935248956974	5.59968325340862	2.98247187453764	1.87753095048942	0.0604453594504731	0.127093649279042	4.08578474049089	7.91033019692753	0	0	0	0	Abhd14b	abhydrolase domain containing 14b [Source:MGI Symbol;Acc:MGI:1923741]
ENSMUSG00000031506	1.98846751940081	5.5924129339644	3.02056274530338	1.85144736445549	0.0641052204268865	0.133312475633396	2.04289237024544	9.88791274615941	0	0	0	0	Ptpn7	protein tyrosine phosphatase, non-receptor type 7 [Source:MGI Symbol;Acc:MGI:2156893]
ENSMUSG00000047787	1.98846751940081	5.5924129339644	3.02056274530338	1.85144736445549	0.0641052204268865	0.133312475633396	2.04289237024544	9.88791274615941	0	0	0	0	Flrt1	fibronectin leucine rich transmembrane protein 1 [Source:MGI Symbol;Acc:MGI:3026647]
ENSMUSG00000048218	1.98846751940081	5.5924129339644	3.02056274530338	1.85144736445549	0.0641052204268865	0.133312475633396	2.04289237024544	9.88791274615941	0	0	0	0	Amigo2	adhesion molecule with Ig like domain 2 [Source:MGI Symbol;Acc:MGI:2145995]
ENSMUSG00000003469	1.97758254923188	5.58431778250785	3.31316690438793	1.68549244383433	0.0918936014429054	0.177741947300998	0	11.8654952953913	0	0	0	0	Phyhip	phytanoyl-CoA hydroxylase interacting protein [Source:MGI Symbol;Acc:MGI:1860417]
ENSMUSG00000005124	1.97758254923188	5.58431778250785	3.31316690438793	1.68549244383433	0.0918936014429054	0.177741947300998	0	11.8654952953913	0	0	0	0	Ccn4	cellular communication network factor 4 [Source:MGI Symbol;Acc:MGI:1197008]
ENSMUSG00000011008	1.97758254923188	5.58431778250785	3.31316690438793	1.68549244383433	0.0918936014429054	0.177741947300998	0	11.8654952953913	0	0	0	0	Mcoln2	mucolipin 2 [Source:MGI Symbol;Acc:MGI:1915529]
ENSMUSG00000020460	1.97758254923188	5.58431778250785	3.31316690438793	1.68549244383433	0.0918936014429054	0.177741947300998	0	11.8654952953913	0	0	0	0	Rps27a	ribosomal protein S27A [Source:MGI Symbol;Acc:MGI:1925544]
ENSMUSG00000022598	1.97758254923188	5.58431778250785	3.31316690438793	1.68549244383433	0.0918936014429054	0.177741947300998	0	11.8654952953913	0	0	0	0	Psca	prostate stem cell antigen [Source:MGI Symbol;Acc:MGI:1919623]
ENSMUSG00000028874	1.97758254923188	5.58431778250785	3.31316690438793	1.68549244383433	0.0918936014429054	0.177741947300998	0	11.8654952953913	0	0	0	0	Fgr	FGR proto-oncogene, Src family tyrosine kinase [Source:MGI Symbol;Acc:MGI:95527]
ENSMUSG00000029153	1.97758254923188	5.58431778250785	3.31316690438793	1.68549244383433	0.0918936014429054	0.177741947300998	0	11.8654952953913	0	0	0	0	Ociad2	OCIA domain containing 2 [Source:MGI Symbol;Acc:MGI:1916377]
ENSMUSG00000030330	1.97758254923188	5.58431778250785	3.31316690438793	1.68549244383433	0.0918936014429054	0.177741947300998	0	11.8654952953913	0	0	0	0	Ing4	inhibitor of growth family, member 4 [Source:MGI Symbol;Acc:MGI:107307]
ENSMUSG00000034450	1.97758254923188	5.58431778250785	3.31316690438793	1.68549244383433	0.0918936014429054	0.177741947300998	0	11.8654952953913	0	0	0	0	Gulo	gulonolactone (L-) oxidase [Source:MGI Symbol;Acc:MGI:1353434]
ENSMUSG00000038580	1.97758254923188	5.58431778250785	3.31316690438793	1.68549244383433	0.0918936014429054	0.177741947300998	0	11.8654952953913	0	0	0	0	Sct	secretin [Source:MGI Symbol;Acc:MGI:99466]
ENSMUSG00000038630	1.97758254923188	5.58431778250785	3.31316690438793	1.68549244383433	0.0918936014429054	0.177741947300998	0	11.8654952953913	0	0	0	0	Zkscan16	zinc finger with KRAB and SCAN domains 16 [Source:MGI Symbol;Acc:MGI:3510405]
ENSMUSG00000045671	1.97758254923188	5.58431778250785	3.31316690438793	1.68549244383433	0.0918936014429054	0.177741947300998	0	11.8654952953913	0	0	0	0	Spred2	sprouty-related EVH1 domain containing 2 [Source:MGI Symbol;Acc:MGI:2150019]
ENSMUSG00000046806	1.97758254923188	5.58431778250785	3.31316690438793	1.68549244383433	0.0918936014429054	0.177741947300998	0	11.8654952953913	0	0	0	0	Cyren	cell cycle regulator of NHEJ [Source:MGI Symbol;Acc:MGI:1925662]
ENSMUSG00000049723	1.97758254923188	5.58431778250785	3.31316690438793	1.68549244383433	0.0918936014429054	0.177741947300998	0	11.8654952953913	0	0	0	0	Mmp12	matrix metallopeptidase 12 [Source:MGI Symbol;Acc:MGI:97005]
ENSMUSG00000059708	1.97758254923188	5.58431778250785	3.31316690438793	1.68549244383433	0.0918936014429054	0.177741947300998	0	11.8654952953913	0	0	0	0	Akap17b	A kinase anchor protein 17B [Source:MGI Symbol;Acc:MGI:2443758]
ENSMUSG00000074872	1.97758254923188	5.58431778250785	3.31316690438793	1.68549244383433	0.0918936014429054	0.177741947300998	0	11.8654952953913	0	0	0	0	Ctxn2	cortexin 2 [Source:MGI Symbol;Acc:MGI:2139444]
ENSMUSG00000079267	1.97758254923188	5.58431778250785	3.31316690438793	1.68549244383433	0.0918936014429054	0.177741947300998	0	11.8654952953913	0	0	0	0	Gm5930	predicted gene 5930 [Source:MGI Symbol;Acc:MGI:3643645]
ENSMUSG00000087370	1.97758254923188	5.58431778250785	3.31316690438793	1.68549244383433	0.0918936014429054	0.177741947300998	0	11.8654952953913	0	0	0	0	Tmem170b	transmembrane protein 170B [Source:MGI Symbol;Acc:MGI:3647046]
ENSMUSG00000087385	1.97758254923188	5.58431778250785	3.31316690438793	1.68549244383433	0.0918936014429054	0.177741947300998	0	11.8654952953913	0	0	0	0	Frg2f1	FSHD region gene 2 family member 1 [Source:MGI Symbol;Acc:MGI:3035485]
ENSMUSG00000019731	14.4858278760569	5.56422234215929	1.19220857226831	4.66715511999109	3.05398766579654e-06	1.46311419874852e-05	4.08578474049089	29.6637382384782	51.3693524694947	0	1.79609180787736	0	Slc35e1	solute carrier family 35, member E1 [Source:MGI Symbol;Acc:MGI:2142403]
ENSMUSG00000090141	156.790893422986	5.56240990122715	0.690419917965327	8.05656058941581	7.84711074189125e-16	7.18663595706197e-15	265.576008131908	302.570130032478	353.164298227776	5.86413851890579	12.1236197031722	1.44716592367787	Gm614	predicted gene 614 [Source:MGI Symbol;Acc:MGI:2685460]
ENSMUSG00000044084	1046.91562905649	5.5472019140896	0.132998763032529	41.7086729801603	0	0	1908.06147380924	2197.09421219662	2044.07215034864	32.6716288910465	48.943501764658	50.6508073287253	Spem2	SPEM family member 2 [Source:MGI Symbol;Acc:MGI:1918293]
ENSMUSG00000062397	7.04577209211022	5.52391888063282	1.56585708271188	3.52772864242887	0.000419141599217457	0.00151580810394519	16.3431389619636	7.91033019692753	17.1231174898316	0	0.898045903938679	0	Zfp706	zinc finger protein 706 [Source:MGI Symbol;Acc:MGI:1915286]
ENSMUSG00000012519	17.705614490778	5.51303122865513	0.933177261420036	5.90780707650959	3.46691681955043e-09	2.13561389226096e-08	38.8149550346634	41.5292335338695	23.5442865485184	0	0.898045903938679	1.44716592367787	Mlkl	mixed lineage kinase domain-like [Source:MGI Symbol;Acc:MGI:1921818]
ENSMUSG00000030865	9.9687316083309	5.48614681626547	1.32868103622651	4.12901717318573	3.64317194697185e-05	0.000153854429556838	12.2573542214727	35.5964858861739	10.7019484311447	1.2566011111941	0	0	Chp2	calcineurin-like EF hand protein 2 [Source:MGI Symbol;Acc:MGI:1917511]
ENSMUSG00000070509	6.59190874475244	5.47938354585274	1.78277599701741	3.07351207051237	0.00211555129235998	0.006748169126207	0	23.7309905907826	14.9827278036026	0.837734074129399	0	0	Rgma	repulsive guidance molecule family member A [Source:MGI Symbol;Acc:MGI:2679262]
ENSMUSG00000040502	3.60999279372618	5.4539443391327	2.31908264341657	2.35176799525252	0.0186844247176704	0.0472505470137591	0	1.97758254923188	19.2635071760605	0.418867037064699	0	0	Marchf9	membrane associated ring-CH-type finger 9 [Source:MGI Symbol;Acc:MGI:2446144]
ENSMUSG00000045763	41.9704758406609	5.43393583118323	1.36198198301827	3.98972666227284	6.61494804725602e-05	0.000268680956445863	79.6728024395723	110.744622756985	55.6501318419526	0	0.449022951969339	5.30627505348551	Basp1	brain abundant, membrane attached signal protein 1 [Source:MGI Symbol;Acc:MGI:1917600]
ENSMUSG00000002083	1.78365807185746	5.42711225575982	3.45944155397135	1.56878275614445	0.116698567738524	0.215242486573339	0	0	10.7019484311447	0	0	0	Bbc3	BCL2 binding component 3 [Source:MGI Symbol;Acc:MGI:2181667]
ENSMUSG00000020377	1.78365807185746	5.42711225575982	3.45944155397135	1.56878275614445	0.116698567738524	0.215242486573339	0	0	10.7019484311447	0	0	0	Ltc4s	leukotriene C4 synthase [Source:MGI Symbol;Acc:MGI:107498]
ENSMUSG00000023945	1.78365807185746	5.42711225575982	3.45944155397135	1.56878275614445	0.116698567738524	0.215242486573339	0	0	10.7019484311447	0	0	0	Slc5a7	solute carrier family 5 (choline transporter), member 7 [Source:MGI Symbol;Acc:MGI:1927126]
ENSMUSG00000026644	1.78365807185746	5.42711225575982	3.45944155397135	1.56878275614445	0.116698567738524	0.215242486573339	0	0	10.7019484311447	0	0	0	Acbd7	acyl-Coenzyme A binding domain containing 7 [Source:MGI Symbol;Acc:MGI:1925495]
ENSMUSG00000026888	1.78365807185746	5.42711225575982	3.45944155397135	1.56878275614445	0.116698567738524	0.215242486573339	0	0	10.7019484311447	0	0	0	Grb14	growth factor receptor bound protein 14 [Source:MGI Symbol;Acc:MGI:1355324]
ENSMUSG00000027446	1.78365807185746	5.42711225575982	3.45944155397135	1.56878275614445	0.116698567738524	0.215242486573339	0	0	10.7019484311447	0	0	0	Cstdc2	cystatin domain containing 2 [Source:MGI Symbol;Acc:MGI:1924955]
ENSMUSG00000027896	1.78365807185746	5.42711225575982	3.45944155397135	1.56878275614445	0.116698567738524	0.215242486573339	0	0	10.7019484311447	0	0	0	Slc16a4	solute carrier family 16 (monocarboxylic acid transporters), member 4 [Source:MGI Symbol;Acc:MGI:2385183]
ENSMUSG00000035427	1.78365807185746	5.42711225575982	3.45944155397135	1.56878275614445	0.116698567738524	0.215242486573339	0	0	10.7019484311447	0	0	0	Mageb4	MAGE family member B4 [Source:MGI Symbol;Acc:MGI:2148568]
ENSMUSG00000037211	1.78365807185746	5.42711225575982	3.45944155397135	1.56878275614445	0.116698567738524	0.215242486573339	0	0	10.7019484311447	0	0	0	Spry1	sprouty RTK signaling antagonist 1 [Source:MGI Symbol;Acc:MGI:1345139]
ENSMUSG00000038663	1.78365807185746	5.42711225575982	3.45944155397135	1.56878275614445	0.116698567738524	0.215242486573339	0	0	10.7019484311447	0	0	0	Fsd2	fibronectin type III and SPRY domain containing 2 [Source:MGI Symbol;Acc:MGI:2444310]
ENSMUSG00000039095	1.78365807185746	5.42711225575982	3.45944155397135	1.56878275614445	0.116698567738524	0.215242486573339	0	0	10.7019484311447	0	0	0	En2	engrailed 2 [Source:MGI Symbol;Acc:MGI:95390]
ENSMUSG00000040037	1.78365807185746	5.42711225575982	3.45944155397135	1.56878275614445	0.116698567738524	0.215242486573339	0	0	10.7019484311447	0	0	0	Negr1	neuronal growth regulator 1 [Source:MGI Symbol;Acc:MGI:2444846]
ENSMUSG00000040706	1.78365807185746	5.42711225575982	3.45944155397135	1.56878275614445	0.116698567738524	0.215242486573339	0	0	10.7019484311447	0	0	0	Agmat	agmatinase [Source:MGI Symbol;Acc:MGI:1923236]
ENSMUSG00000040726	1.78365807185746	5.42711225575982	3.45944155397135	1.56878275614445	0.116698567738524	0.215242486573339	0	0	10.7019484311447	0	0	0	Hesx1	homeobox gene expressed in ES cells [Source:MGI Symbol;Acc:MGI:96071]
ENSMUSG00000048486	1.78365807185746	5.42711225575982	3.45944155397135	1.56878275614445	0.116698567738524	0.215242486573339	0	0	10.7019484311447	0	0	0	Fitm2	fat storage-inducing transmembrane protein 2 [Source:MGI Symbol;Acc:MGI:2444508]
ENSMUSG00000063160	1.78365807185746	5.42711225575982	3.45944155397135	1.56878275614445	0.116698567738524	0.215242486573339	0	0	10.7019484311447	0	0	0	Numbl	numb-like [Source:MGI Symbol;Acc:MGI:894702]
ENSMUSG00000074698	1.78365807185746	5.42711225575982	3.45944155397135	1.56878275614445	0.116698567738524	0.215242486573339	0	0	10.7019484311447	0	0	0	Csnk2a1	casein kinase 2, alpha 1 polypeptide [Source:MGI Symbol;Acc:MGI:88543]
ENSMUSG00000074818	1.78365807185746	5.42711225575982	3.45944155397135	1.56878275614445	0.116698567738524	0.215242486573339	0	0	10.7019484311447	0	0	0	Pdzd7	PDZ domain containing 7 [Source:MGI Symbol;Acc:MGI:3608325]
ENSMUSG00000091898	1.78365807185746	5.42711225575982	3.45944155397135	1.56878275614445	0.116698567738524	0.215242486573339	0	0	10.7019484311447	0	0	0	Tnnc1	troponin C, cardiac/slow skeletal [Source:MGI Symbol;Acc:MGI:98779]
ENSMUSG00000035504	3754.93678352821	5.42693979717835	0.0701151640510971	77.400372239355	0	0	7295.16865414648	7174.66948861327	7547.01403364327	165.033612603492	156.709010237299	191.025901925478	Reep6	receptor accessory protein 6 [Source:MGI Symbol;Acc:MGI:1917585]
ENSMUSG00000039903	76.4985635869382	5.41673941431927	2.1218251698656	2.55286792297896	0.0106840001952184	0.0288925658682172	134.830896436199	219.511662964739	94.1771461940737	10.4716759266175	0	0	Eva1c	eva-1 homolog C [Source:MGI Symbol;Acc:MGI:1918217]
ENSMUSG00000036251	13.1078058817416	5.41649613674617	1.17889386107824	4.59455792889796	4.33667645774263e-06	2.04532594254627e-05	8.17156948098178	23.7309905907826	44.9481834108079	0	1.79609180787736	0	Trpm8	transient receptor potential cation channel, subfamily M, member 8 [Source:MGI Symbol;Acc:MGI:2181435]
ENSMUSG00000035606	1.76740851919354	5.41410385691746	3.16762067887232	1.70920208124317	0.0874135234932158	0.171422578316797	2.04289237024544	0	8.56155874491579	0	0	0	Ky	kyphoscoliosis peptidase [Source:MGI Symbol;Acc:MGI:96709]
ENSMUSG00000019230	1.75652354902461	5.40593359546317	3.17507335665098	1.70261691250033	0.0886397829613827	0.173117616314497	0	1.97758254923188	8.56155874491579	0	0	0	Lhx9	LIM homeobox protein 9 [Source:MGI Symbol;Acc:MGI:1316721]
ENSMUSG00000019796	1.75652354902461	5.40593359546317	3.17507335665098	1.70261691250033	0.0886397829613827	0.173117616314497	0	1.97758254923188	8.56155874491579	0	0	0	Lrp11	low density lipoprotein receptor-related protein 11 [Source:MGI Symbol;Acc:MGI:2442989]
ENSMUSG00000020542	1.75652354902461	5.40593359546317	3.17507335665098	1.70261691250033	0.0886397829613827	0.173117616314497	0	1.97758254923188	8.56155874491579	0	0	0	Myocd	myocardin [Source:MGI Symbol;Acc:MGI:2137495]
ENSMUSG00000041886	1.75652354902461	5.40593359546317	3.17507335665098	1.70261691250033	0.0886397829613827	0.173117616314497	0	1.97758254923188	8.56155874491579	0	0	0	Macc1	metastasis associated in colon cancer 1 [Source:MGI Symbol;Acc:MGI:2685113]
ENSMUSG00000121608	1.75652354902461	5.40593359546317	3.17507335665098	1.70261691250033	0.0886397829613827	0.173117616314497	0	1.97758254923188	8.56155874491579	0	0	0		steroid sulfatase (microsomal), isozyme S
ENSMUSG00000020905	1.75115896652962	5.40191868977059	3.15236318167489	1.71360924438297	0.0866005146233382	0.170150173834196	4.08578474049089	0	6.42116905868684	0	0	0	Usp43	ubiquitin specific peptidase 43 [Source:MGI Symbol;Acc:MGI:2444541]
ENSMUSG00000029178	1.75115896652962	5.40191868977059	3.15236318167489	1.71360924438297	0.0866005146233382	0.170150173834196	4.08578474049089	0	6.42116905868684	0	0	0	Klf3	Kruppel-like transcription factor 3 (basic) [Source:MGI Symbol;Acc:MGI:1342773]
ENSMUSG00000026890	1.7349094138657	5.38971281730556	3.16383380694615	1.70353853779314	0.0884673324025909	0.173052565758261	6.12867711073633	0	4.28077937245789	0	0	0	Lhx6	LIM homeobox protein 6 [Source:MGI Symbol;Acc:MGI:1306803]
ENSMUSG00000032373	1.7349094138657	5.38971281730556	3.16383380694615	1.70353853779314	0.0884673324025909	0.173052565758261	6.12867711073633	0	4.28077937245789	0	0	0	Car12	carbonic anhydrase 12 [Source:MGI Symbol;Acc:MGI:1923709]
ENSMUSG00000000149	22.4656993956701	5.38772824856418	1.60065389401727	3.36595454439074	0.000762792771213989	0.00263670197209238	67.4154482180997	25.7085731400145	38.527014352121	0	3.14316066378538	0	Gna12	guanine nucleotide binding protein, alpha 12 [Source:MGI Symbol;Acc:MGI:95767]
ENSMUSG00000002057	1.72938902619177	5.38542317583982	3.16773	1.70009106132249	0.0891137983760911	0.173797759197655	0	3.95516509846377	6.42116905868684	0	0	0	Foxn1	forkhead box N1 [Source:MGI Symbol;Acc:MGI:102949]
ENSMUSG00000039873	1.72938902619177	5.38542317583982	3.16773	1.70009106132249	0.0891137983760911	0.173797759197655	0	3.95516509846377	6.42116905868684	0	0	0	Neurl2	neuralized E3 ubiquitin protein ligase 2 [Source:MGI Symbol;Acc:MGI:3043305]
ENSMUSG00000048332	1.72938902619177	5.38542317583982	3.16773	1.70009106132249	0.0891137983760911	0.173797759197655	0	3.95516509846377	6.42116905868684	0	0	0	Lhfpl6	LHFPL tetraspan subfamily member 6 [Source:MGI Symbol;Acc:MGI:1920048]
ENSMUSG00000050989	1.72938902619177	5.38542317583982	3.16773	1.70009106132249	0.0891137983760911	0.173797759197655	0	3.95516509846377	6.42116905868684	0	0	0	Selenon	selenoprotein N [Source:MGI Symbol;Acc:MGI:2151208]
ENSMUSG00000014547	1.71865986120179	5.37741326910554	3.20157791567148	1.67961343148437	0.0930325526785867	0.179331348056972	8.17156948098178	0	2.14038968622895	0	0	0	Wdfy2	WD repeat and FYVE domain containing 2 [Source:MGI Symbol;Acc:MGI:2442811]
ENSMUSG00000021396	1.71865986120179	5.37741326910554	3.20157791567148	1.67961343148437	0.0930325526785867	0.179331348056972	8.17156948098178	0	2.14038968622895	0	0	0	Nxnl2	nucleoredoxin-like 2 [Source:MGI Symbol;Acc:MGI:1922374]
ENSMUSG00000026447	1.71865986120179	5.37741326910554	3.20157791567148	1.67961343148437	0.0930325526785867	0.179331348056972	8.17156948098178	0	2.14038968622895	0	0	0	Pik3c2b	phosphatidylinositol-4-phosphate 3-kinase catalytic subunit type 2 beta [Source:MGI Symbol;Acc:MGI:2685045]
ENSMUSG00000037263	1.71865986120179	5.37741326910554	3.20157791567148	1.67961343148437	0.0930325526785867	0.179331348056972	8.17156948098178	0	2.14038968622895	0	0	0	Aldh3b3	aldehyde dehydrogenase 3 family, member B3 [Source:MGI Symbol;Acc:MGI:1920708]
ENSMUSG00000076441	1.71865986120179	5.37741326910554	3.20157791567148	1.67961343148437	0.0930325526785867	0.179331348056972	8.17156948098178	0	2.14038968622895	0	0	0	Ass1	argininosuccinate synthetase 1 [Source:MGI Symbol;Acc:MGI:88090]
ENSMUSG00000032733	3.40902393276424	5.37396058085569	2.30108981452927	2.33539801311712	0.0195226381301652	0.0491007179827835	6.12867711073633	13.8430778446232	0	0	0	0.482388641225955	Snx33	sorting nexin 33 [Source:MGI Symbol;Acc:MGI:2443239]
ENSMUSG00000028115	1.71313947352785	5.37302436328929	2.92088221197003	1.83952106704959	0.0658385821889844	NA	2.04289237024544	3.95516509846377	4.28077937245789	0	0	0	Bnipl	BCL2/adenovirus E1B 19kD interacting protein like [Source:MGI Symbol;Acc:MGI:2384749]
ENSMUSG00000070777	1.70777489103286	5.36908077867234	2.94421900668548	1.82360101829405	0.0682124125314749	NA	6.12867711073633	1.97758254923188	2.14038968622895	0	0	0	Ceacam20	CEA cell adhesion molecule 20 [Source:MGI Symbol;Acc:MGI:1918851]
ENSMUSG00000025034	1.70241030853787	5.36484209338503	3.5238580391693	1.52243422798318	0.127900313919723	NA	10.2144618512272	0	0	0	0	0	Trim8	tripartite motif-containing 8 [Source:MGI Symbol;Acc:MGI:1933302]
ENSMUSG00000025739	1.70241030853787	5.36484209338503	3.5238580391693	1.52243422798318	0.127900313919723	NA	10.2144618512272	0	0	0	0	0	Gng13	guanine nucleotide binding protein (G protein), gamma 13 [Source:MGI Symbol;Acc:MGI:1925616]
ENSMUSG00000028780	1.70241030853787	5.36484209338503	3.5238580391693	1.52243422798318	0.127900313919723	NA	10.2144618512272	0	0	0	0	0	Sema3c	sema domain, immunoglobulin domain (Ig), short basic domain, secreted, (semaphorin) 3C [Source:MGI Symbol;Acc:MGI:107557]
ENSMUSG00000032105	1.70241030853787	5.36484209338503	3.5238580391693	1.52243422798318	0.127900313919723	NA	10.2144618512272	0	0	0	0	0	Nherf4	NHERF family PDZ scaffold protein 4 [Source:MGI Symbol;Acc:MGI:2429554]
ENSMUSG00000035451	1.70241030853787	5.36484209338503	3.5238580391693	1.52243422798318	0.127900313919723	NA	10.2144618512272	0	0	0	0	0	Foxa1	forkhead box A1 [Source:MGI Symbol;Acc:MGI:1347472]
ENSMUSG00000036863	1.70241030853787	5.36484209338503	3.5238580391693	1.52243422798318	0.127900313919723	NA	10.2144618512272	0	0	0	0	0	Syde2	synapse defective 1, Rho GTPase, homolog 2 (C. elegans) [Source:MGI Symbol;Acc:MGI:3036264]
ENSMUSG00000042505	1.70241030853787	5.36484209338503	3.5238580391693	1.52243422798318	0.127900313919723	NA	10.2144618512272	0	0	0	0	0	Sdhaf3	succinate dehydrogenase complex assembly factor 3 [Source:MGI Symbol;Acc:MGI:1913288]
ENSMUSG00000043873	1.70241030853787	5.36484209338503	3.5238580391693	1.52243422798318	0.127900313919723	NA	10.2144618512272	0	0	0	0	0	Chil5	chitinase-like 5 [Source:MGI Symbol;Acc:MGI:2676649]
ENSMUSG00000045337	1.70241030853787	5.36484209338503	3.5238580391693	1.52243422798318	0.127900313919723	NA	10.2144618512272	0	0	0	0	0	Defb11	defensin beta 11 [Source:MGI Symbol;Acc:MGI:2179197]
ENSMUSG00000045515	1.70241030853787	5.36484209338503	3.5238580391693	1.52243422798318	0.127900313919723	NA	10.2144618512272	0	0	0	0	0	Pou3f3	POU domain, class 3, transcription factor 3 [Source:MGI Symbol;Acc:MGI:102564]
ENSMUSG00000047419	1.70241030853787	5.36484209338503	3.5238580391693	1.52243422798318	0.127900313919723	NA	10.2144618512272	0	0	0	0	0	Cmya5	cardiomyopathy associated 5 [Source:MGI Symbol;Acc:MGI:1923719]
ENSMUSG00000050195	1.70241030853787	5.36484209338503	3.5238580391693	1.52243422798318	0.127900313919723	NA	10.2144618512272	0	0	0	0	0	Scd4	stearoyl-coenzyme A desaturase 4 [Source:MGI Symbol;Acc:MGI:2670997]
ENSMUSG00000060560	1.70241030853787	5.36484209338503	3.5238580391693	1.52243422798318	0.127900313919723	NA	10.2144618512272	0	0	0	0	0	Ces4a	carboxylesterase 4A [Source:MGI Symbol;Acc:MGI:2384581]
ENSMUSG00000052928	1.70225450335892	5.36468641567568	3.18660016352894	1.68351413430377	0.0922756055148686	NA	0	5.93274764769565	4.28077937245789	0	0	0	Ctif	CBP80/20-dependent translation initiation factor [Source:MGI Symbol;Acc:MGI:2685518]
ENSMUSG00000069919	1.70225450335892	5.36468641567568	3.18660016352894	1.68351413430377	0.0922756055148686	NA	0	5.93274764769565	4.28077937245789	0	0	0	Hba-a1	hemoglobin alpha, adult chain 1 [Source:MGI Symbol;Acc:MGI:96015]
ENSMUSG00000089682	1.70225450335892	5.36468641567568	3.18660016352894	1.68351413430377	0.0922756055148686	NA	0	5.93274764769565	4.28077937245789	0	0	0	Bcl2l2	BCL2-like 2 [Source:MGI Symbol;Acc:MGI:108052]
ENSMUSG00000023984	1.69152533836894	5.3565218019079	3.22113015291025	1.66293243291282	0.0963259613253616	NA	8.17156948098178	1.97758254923188	0	0	0	0	Gm20517	predicted gene 20517 [Source:MGI Symbol;Acc:MGI:5141982]
ENSMUSG00000038227	1.69152533836894	5.3565218019079	3.22113015291025	1.66293243291282	0.0963259613253616	NA	8.17156948098178	1.97758254923188	0	0	0	0	Hoxa9	homeobox A9 [Source:MGI Symbol;Acc:MGI:96180]
ENSMUSG00000067825	6.27803981770155	5.3560741950841	1.62597059987884	3.29407813123018	0.000987450469362011	0.00333630032259042	16.3431389619636	11.8654952953913	8.56155874491579	0	0.898045903938679	0	Pex26	peroxisomal biogenesis factor 26 [Source:MGI Symbol;Acc:MGI:1921293]
ENSMUSG00000026072	1.68064036820002	5.34806353963809	3.20232599014463	1.67005593936942	0.0949082964659434	NA	6.12867711073633	3.95516509846377	0	0	0	0	Il1r1	interleukin 1 receptor, type I [Source:MGI Symbol;Acc:MGI:96545]
ENSMUSG00000038702	1.67511998052608	5.34359918750909	3.23318239261038	1.65273669673637	0.0983844624512081	NA	0	7.91033019692753	2.14038968622895	0	0	0	Dsel	dermatan sulfate epimerase-like [Source:MGI Symbol;Acc:MGI:2442948]
ENSMUSG00000041134	1.67511998052608	5.34359918750909	3.23318239261038	1.65273669673637	0.0983844624512081	NA	0	7.91033019692753	2.14038968622895	0	0	0	Cyyr1	cysteine and tyrosine-rich protein 1 [Source:MGI Symbol;Acc:MGI:2152187]
ENSMUSG00000027684	1.65887042786216	5.3308635488871	3.24600372888982	1.64228509703848	0.100530934141965	NA	2.04289237024544	7.91033019692753	0	0	0	0	Mecom	MDS1 and EVI1 complex locus [Source:MGI Symbol;Acc:MGI:95457]
ENSMUSG00000001027	1.64798545769324	5.32132646372462	3.57023003033674	1.49047159945117	0.13610027861576	NA	0	9.88791274615941	0	0	0	0	Scn4a	sodium channel, voltage-gated, type IV, alpha [Source:MGI Symbol;Acc:MGI:98250]
ENSMUSG00000001493	1.64798545769324	5.32132646372462	3.57023003033674	1.49047159945117	0.13610027861576	NA	0	9.88791274615941	0	0	0	0	Meox1	mesenchyme homeobox 1 [Source:MGI Symbol;Acc:MGI:103220]
ENSMUSG00000019528	1.64798545769324	5.32132646372462	3.57023003033674	1.49047159945117	0.13610027861576	NA	0	9.88791274615941	0	0	0	0	Gyg1	glycogenin 1 [Source:MGI Symbol;Acc:MGI:1351614]
ENSMUSG00000019789	1.64798545769324	5.32132646372462	3.57023003033674	1.49047159945117	0.13610027861576	NA	0	9.88791274615941	0	0	0	0	Hey2	hairy/enhancer-of-split related with YRPW motif 2 [Source:MGI Symbol;Acc:MGI:1341884]
ENSMUSG00000021536	1.64798545769324	5.32132646372462	3.57023003033674	1.49047159945117	0.13610027861576	NA	0	9.88791274615941	0	0	0	0	Adcy2	adenylate cyclase 2 [Source:MGI Symbol;Acc:MGI:99676]
ENSMUSG00000023247	1.64798545769324	5.32132646372462	3.57023003033674	1.49047159945117	0.13610027861576	NA	0	9.88791274615941	0	0	0	0	Guca2a	guanylate cyclase activator 2a (guanylin) [Source:MGI Symbol;Acc:MGI:102738]
ENSMUSG00000023249	1.64798545769324	5.32132646372462	3.57023003033674	1.49047159945117	0.13610027861576	NA	0	9.88791274615941	0	0	0	0	Parp3	poly (ADP-ribose) polymerase family, member 3 [Source:MGI Symbol;Acc:MGI:1891258]
ENSMUSG00000027656	1.64798545769324	5.32132646372462	3.57023003033674	1.49047159945117	0.13610027861576	NA	0	9.88791274615941	0	0	0	0	Ccn5	cellular communication network factor 5 [Source:MGI Symbol;Acc:MGI:1328326]
ENSMUSG00000027698	1.64798545769324	5.32132646372462	3.57023003033674	1.49047159945117	0.13610027861576	NA	0	9.88791274615941	0	0	0	0	Nceh1	neutral cholesterol ester hydrolase 1 [Source:MGI Symbol;Acc:MGI:2443191]
ENSMUSG00000034957	1.64798545769324	5.32132646372462	3.57023003033674	1.49047159945117	0.13610027861576	NA	0	9.88791274615941	0	0	0	0	Cebpa	CCAAT/enhancer binding protein alpha [Source:MGI Symbol;Acc:MGI:99480]
ENSMUSG00000036136	1.64798545769324	5.32132646372462	3.57023003033674	1.49047159945117	0.13610027861576	NA	0	9.88791274615941	0	0	0	0	Fam110c	family with sequence similarity 110, member C [Source:MGI Symbol;Acc:MGI:1918813]
ENSMUSG00000040797	1.64798545769324	5.32132646372462	3.57023003033674	1.49047159945117	0.13610027861576	NA	0	9.88791274615941	0	0	0	0	Iqsec3	IQ motif and Sec7 domain 3 [Source:MGI Symbol;Acc:MGI:2677208]
ENSMUSG00000040938	1.64798545769324	5.32132646372462	3.57023003033674	1.49047159945117	0.13610027861576	NA	0	9.88791274615941	0	0	0	0	Slc16a11	solute carrier family 16 (monocarboxylic acid transporters), member 11 [Source:MGI Symbol;Acc:MGI:2663709]
ENSMUSG00000041075	1.64798545769324	5.32132646372462	3.57023003033674	1.49047159945117	0.13610027861576	NA	0	9.88791274615941	0	0	0	0	Fzd7	frizzled class receptor 7 [Source:MGI Symbol;Acc:MGI:108570]
ENSMUSG00000041453	1.64798545769324	5.32132646372462	3.57023003033674	1.49047159945117	0.13610027861576	NA	0	9.88791274615941	0	0	0	0	Rpl21	ribosomal protein L21 [Source:MGI Symbol;Acc:MGI:1278340]
ENSMUSG00000042282	1.64798545769324	5.32132646372462	3.57023003033674	1.49047159945117	0.13610027861576	NA	0	9.88791274615941	0	0	0	0	Gucy2f	guanylate cyclase 2f [Source:MGI Symbol;Acc:MGI:105119]
ENSMUSG00000051682	1.64798545769324	5.32132646372462	3.57023003033674	1.49047159945117	0.13610027861576	NA	0	9.88791274615941	0	0	0	0	Treml4	triggering receptor expressed on myeloid cells-like 4 [Source:MGI Symbol;Acc:MGI:1923239]
ENSMUSG00000057863	1.64798545769324	5.32132646372462	3.57023003033674	1.49047159945117	0.13610027861576	NA	0	9.88791274615941	0	0	0	0	Rpl36	ribosomal protein L36 [Source:MGI Symbol;Acc:MGI:1860603]
ENSMUSG00000072955	1.64798545769324	5.32132646372462	3.57023003033674	1.49047159945117	0.13610027861576	NA	0	9.88791274615941	0	0	0	0	Tmsb15l	thymosin beta 15b like [Source:MGI Symbol;Acc:MGI:3026988]
ENSMUSG00000081534	1.64798545769324	5.32132646372462	3.57023003033674	1.49047159945117	0.13610027861576	NA	0	9.88791274615941	0	0	0	0	Slc48a1	solute carrier family 48 (heme transporter), member 1 [Source:MGI Symbol;Acc:MGI:1914989]
ENSMUSG00000091497	1.64798545769324	5.32132646372462	3.57023003033674	1.49047159945117	0.13610027861576	NA	0	9.88791274615941	0	0	0	0	Mageb11	MAGE family member B11 [Source:MGI Symbol;Acc:MGI:2684890]
ENSMUSG00000096145	1.64798545769324	5.32132646372462	3.57023003033674	1.49047159945117	0.13610027861576	NA	0	9.88791274615941	0	0	0	0	Vkorc1	vitamin K epoxide reductase complex, subunit 1 [Source:MGI Symbol;Acc:MGI:106442]
ENSMUSG00000117924	1.64798545769324	5.32132646372462	3.57023003033674	1.49047159945117	0.13610027861576	NA	0	9.88791274615941	0	0	0	0	Tmem223	transmembrane protein 223 [Source:MGI Symbol;Acc:MGI:1914086]
ENSMUSG00000028519	3.29098263621441	5.31281012406505	2.57147417963505	2.06605618136872	0.0388231750747279	0.0882228811263276	0	0	19.2635071760605	0	0	0.482388641225955	Dab1	disabled 1 [Source:MGI Symbol;Acc:MGI:108554]
ENSMUSG00000059040	3.21490308967537	5.2821661895228	2.21045510433213	2.38962835262775	0.0168654295868412	0.0431417827584419	2.04289237024544	3.95516509846377	12.8423381173737	0	0.449022951969339	0	Eno1b	enolase 1B, retrotransposed [Source:MGI Symbol;Acc:MGI:3648653]
ENSMUSG00000031085	289.608212542653	5.27231558192359	0.233899477880566	22.5409463488232	1.64759371980816e-112	7.64594145270674e-111	541.366478115043	611.073007712652	541.518590615924	20.1056177791056	7.18436723150943	16.4012138016825	Acte1	actin, epsilon 1 [Source:MGI Symbol;Acc:MGI:2685344]
ENSMUSG00000029999	3.16635079739807	5.26025892153788	2.21958898032343	2.36992477804219	0.0177917045980587	0.0452505991996024	12.2573542214727	1.97758254923188	4.28077937245789	0	0	0.482388641225955	Tgfa	transforming growth factor alpha [Source:MGI Symbol;Acc:MGI:98724]
ENSMUSG00000028399	15.2374022093898	5.26015820912631	1.07054825202928	4.91351809613008	8.94564717192602e-07	4.51163884335945e-06	42.9007397751543	11.8654952953913	34.2462349796631	0	0	2.41194320612978	Ptprd	protein tyrosine phosphatase receptor type D [Source:MGI Symbol;Acc:MGI:97812]
ENSMUSG00000026095	56.4220418728882	5.24084140826759	1.02040621520702	5.13603438529068	2.80596340665753e-07	1.47809262552307e-06	136.873788806445	100.856710010826	92.0367565078447	0	5.38827542363207	3.37672048858169	Asnsd1	asparagine synthetase domain containing 1 [Source:MGI Symbol;Acc:MGI:1917646]
ENSMUSG00000006435	250.973072681709	5.23427918316399	0.237936300425811	21.998657513783	2.96628451181545e-107	1.26341371484414e-105	510.723092561361	395.516509846376	560.782097791984	15.4980803713939	10.7765508472641	12.5421046718748	Neurl1a	neuralized E3 ubiquitin protein ligase 1A [Source:MGI Symbol;Acc:MGI:1334263]
ENSMUSG00000007682	5.86727608391432	5.20680419209191	1.72631304963106	3.01614136161728	0.00256013874299546	0.00804051655218045	14.3002465917181	17.7982429430869	2.14038968622895	0	0	0.964777282451911	Dio2	deiodinase, iodothyronine, type II [Source:MGI Symbol;Acc:MGI:1338833]
ENSMUSG00000003534	14.1705199656055	5.20631218975256	1.16239110014139	4.47896769780779	7.50048816308288e-06	3.45238975885499e-05	42.9007397751543	35.5964858861739	4.28077937245789	0	2.2451147598467	0	Ddr1	discoidin domain receptor family, member 1 [Source:MGI Symbol;Acc:MGI:99216]
ENSMUSG00000027927	798.593077267616	5.20372409511748	0.336056154017515	15.4846862136209	4.40205113752695e-54	1.07984832342057e-52	1495.39721501967	1669.07967155171	1500.41317004649	46.9131081512463	23.798216454375	55.9570823822108	Lelp1	late cornified envelope-like proline-rich 1 [Source:MGI Symbol;Acc:MGI:1916582]
ENSMUSG00000027562	389.177954890086	5.20321717167487	0.213209887505665	24.4042020402859	1.54324879075179e-131	8.64566901377479e-130	663.940020329769	674.355649288072	935.35029288205	20.5244848161703	27.3904000701297	13.5068819543268	Car2	carbonic anhydrase 2 [Source:MGI Symbol;Acc:MGI:88269]
ENSMUSG00000024646	11.4811362932566	5.20229555618467	1.13851412984959	4.56937285167639	4.89185834474887e-06	2.29411923957925e-05	24.5147084429453	29.6637382384782	12.8423381173737	0.418867037064699	0	1.44716592367787	Cyb5a	cytochrome b5 type A (microsomal) [Source:MGI Symbol;Acc:MGI:1926952]
ENSMUSG00000059690	19.5574486161732	5.19045093279481	0.872326328571406	5.95012527169176	2.67937336721245e-09	1.66533566057077e-08	32.6862779239271	49.4395637307971	32.1058452934342	0.418867037064699	2.69413771181604	0	1700020N15Rik	RIKEN cDNA 1700020N15 gene [Source:MGI Symbol;Acc:MGI:1922759]
ENSMUSG00000078612	5.40934879794102	5.1875071863508	1.91387420548028	2.7104744771086	0.00671870192081304	0.0190690314443523	10.2144618512272	0	21.4038968622895	0.837734074129399	0	0	Fyb2	FYN binding protein 2 [Source:MGI Symbol;Acc:MGI:2685466]
ENSMUSG00000029861	41.2631879735092	5.17679612922276	0.562715646373812	9.19966623032871	3.59063316732353e-20	4.0597004274548e-19	91.930156661045	87.0136321662028	62.0713009006395	3.76980333358229	1.34706885590802	1.44716592367787	Fam131b	family with sequence similarity 131, member B [Source:MGI Symbol;Acc:MGI:1923406]
ENSMUSG00000027465	926.699066275681	5.15124980228612	0.146290229579406	35.2125348158679	1.28564143522276e-271	1.56760024802603e-269	1771.1876850028	1730.3847305779	1907.08721042999	67.8564600044813	35.9218361575471	47.7564754813696	Tbc1d20	TBC1 domain family, member 20 [Source:MGI Symbol;Acc:MGI:1914481]
ENSMUSG00000079652	999.670402787925	5.13976286358683	0.124178358913588	41.3901657950194	0	0	2053.10683209667	1922.21023785339	1857.85824764673	66.5998588932872	47.5964	50.6508073287253	Garin1a	golgi associated RAB2 interactor 1A [Source:MGI Symbol;Acc:MGI:2141439]
ENSMUSG00000032537	10.9088660663518	5.12362443837065	1.1553003177233	4.43488533653963	9.2121307097268e-06	4.205993745847e-05	30.6433855536817	15.8206603938551	17.1231174898316	0.418867037064699	0	1.44716592367787	Ephb1	Eph receptor B1 [Source:MGI Symbol;Acc:MGI:1096337]
ENSMUSG00000070720	2.87461739368224	5.11359647245312	2.29164473640001	2.23140890524164	0.0256540555123484	0.0622528305558347	4.08578474049089	1.97758254923188	10.7019484311447	0	0	0.482388641225955	Tmem200b	transmembrane protein 200B [Source:MGI Symbol;Acc:MGI:3646343]
ENSMUSG00000019935	1.42692645748596	5.10510616997466	3.79491393036026	1.34525	0.178544667046241	NA	0	0	8.56155874491579	0	0	0	Slc17a8	solute carrier family 17 (sodium-dependent inorganic phosphate cotransporter), member 8 [Source:MGI Symbol;Acc:MGI:3039629]
ENSMUSG00000020702	1.42692645748596	5.10510616997466	3.79491393036026	1.34525	0.178544667046241	NA	0	0	8.56155874491579	0	0	0	Ccl1	C-C motif chemokine ligand 1 [Source:MGI Symbol;Acc:MGI:98258]
ENSMUSG00000021751	1.42692645748596	5.10510616997466	3.79491393036026	1.34525	0.178544667046241	NA	0	0	8.56155874491579	0	0	0	Acox2	acyl-Coenzyme A oxidase 2, branched chain [Source:MGI Symbol;Acc:MGI:1934852]
ENSMUSG00000024039	1.42692645748596	5.10510616997466	3.79491393036026	1.34525	0.178544667046241	NA	0	0	8.56155874491579	0	0	0	Cbs	cystathionine beta-synthase [Source:MGI Symbol;Acc:MGI:88285]
ENSMUSG00000026080	1.42692645748596	5.10510616997466	3.79491393036026	1.34525	0.178544667046241	NA	0	0	8.56155874491579	0	0	0	Chst10	carbohydrate sulfotransferase 10 [Source:MGI Symbol;Acc:MGI:2138283]
ENSMUSG00000026426	1.42692645748596	5.10510616997466	3.79491393036026	1.34525	0.178544667046241	NA	0	0	8.56155874491579	0	0	0	Arl8a	ADP-ribosylation factor-like 8A [Source:MGI Symbol;Acc:MGI:1915974]
ENSMUSG00000026511	1.42692645748596	5.10510616997466	3.79491393036026	1.34525	0.178544667046241	NA	0	0	8.56155874491579	0	0	0	Srp9	signal recognition particle 9 [Source:MGI Symbol;Acc:MGI:1350930]
ENSMUSG00000027669	1.42692645748596	5.10510616997466	3.79491393036026	1.34525	0.178544667046241	NA	0	0	8.56155874491579	0	0	0	Gnb4	guanine nucleotide binding protein (G protein), beta 4 [Source:MGI Symbol;Acc:MGI:104581]
ENSMUSG00000028655	1.42692645748596	5.10510616997466	3.79491393036026	1.34525	0.178544667046241	NA	0	0	8.56155874491579	0	0	0	Mfsd2a	MFSD2 lysolipid transporter A, lysophospholipid [Source:MGI Symbol;Acc:MGI:1923824]
ENSMUSG00000031760	1.42692645748596	5.10510616997466	3.79491393036026	1.34525	0.178544667046241	NA	0	0	8.56155874491579	0	0	0	Mt3	metallothionein 3 [Source:MGI Symbol;Acc:MGI:97173]
ENSMUSG00000035547	1.42692645748596	5.10510616997466	3.79491393036026	1.34525	0.178544667046241	NA	0	0	8.56155874491579	0	0	0	Capn5	calpain 5 [Source:MGI Symbol;Acc:MGI:1100859]
ENSMUSG00000039717	1.42692645748596	5.10510616997466	3.79491393036026	1.34525	0.178544667046241	NA	0	0	8.56155874491579	0	0	0	Ralyl	RALY RNA binding protein-like [Source:MGI Symbol;Acc:MGI:1924147]
ENSMUSG00000039981	1.42692645748596	5.10510616997466	3.79491393036026	1.34525	0.178544667046241	NA	0	0	8.56155874491579	0	0	0	Zc3h12d	zinc finger CCCH type containing 12D [Source:MGI Symbol;Acc:MGI:3045313]
ENSMUSG00000039997	1.42692645748596	5.10510616997466	3.79491393036026	1.34525	0.178544667046241	NA	0	0	8.56155874491579	0	0	0	Ifi203	interferon activated gene 203 [Source:MGI Symbol;Acc:MGI:96428]
ENSMUSG00000041205	1.42692645748596	5.10510616997466	3.79491393036026	1.34525	0.178544667046241	NA	0	0	8.56155874491579	0	0	0	Map6d1	MAP6 domain containing 1 [Source:MGI Symbol;Acc:MGI:3607784]
ENSMUSG00000044667	1.42692645748596	5.10510616997466	3.79491393036026	1.34525	0.178544667046241	NA	0	0	8.56155874491579	0	0	0	Plppr4	phospholipid phosphatase related 4 [Source:MGI Symbol;Acc:MGI:106530]
ENSMUSG00000044707	1.42692645748596	5.10510616997466	3.79491393036026	1.34525	0.178544667046241	NA	0	0	8.56155874491579	0	0	0	Ccnjl	cyclin J-like [Source:MGI Symbol;Acc:MGI:2685723]
ENSMUSG00000046329	1.42692645748596	5.10510616997466	3.79491393036026	1.34525	0.178544667046241	NA	0	0	8.56155874491579	0	0	0	Slc25a23	solute carrier family 25 (mitochondrial carrier; phosphate carrier), member 23 [Source:MGI Symbol;Acc:MGI:1914222]
ENSMUSG00000059325	1.42692645748596	5.10510616997466	3.79491393036026	1.34525	0.178544667046241	NA	0	0	8.56155874491579	0	0	0	Hopx	HOP homeobox [Source:MGI Symbol;Acc:MGI:1916782]
ENSMUSG00000074625	1.42692645748596	5.10510616997466	3.79491393036026	1.34525	0.178544667046241	NA	0	0	8.56155874491579	0	0	0	Arhgap40	Rho GTPase activating protein 40 [Source:MGI Symbol;Acc:MGI:3649852]
ENSMUSG00000090700	1.42692645748596	5.10510616997466	3.79491393036026	1.34525	0.178544667046241	NA	0	0	8.56155874491579	0	0	0	Cyp4f40	cytochrome P450, family 4, subfamily f, polypeptide 40 [Source:MGI Symbol;Acc:MGI:3645508]
ENSMUSG00000096883	1.42692645748596	5.10510616997466	3.79491393036026	1.34525	0.178544667046241	NA	0	0	8.56155874491579	0	0	0	Shisa8	shisa family member 8 [Source:MGI Symbol;Acc:MGI:2146080]
ENSMUSG00000028373	1.41067690482205	5.08907727957127	3.46820841398979	1.46735047958576	0.142280738219405	NA	2.04289237024544	0	6.42116905868684	0	0	0	Astn2	astrotactin 2 [Source:MGI Symbol;Acc:MGI:1889277]
ENSMUSG00000043088	1.41067690482205	5.08907727957127	3.46820841398979	1.46735047958576	0.142280738219405	NA	2.04289237024544	0	6.42116905868684	0	0	0	Il17re	interleukin 17 receptor E [Source:MGI Symbol;Acc:MGI:1889371]
ENSMUSG00000015476	1.39979193465312	5.0788532618157	3.47933102133817	1.45972120234261	0.144366712345839	NA	0	1.97758254923188	6.42116905868684	0	0	0	Prrt1	proline-rich transmembrane protein 1 [Source:MGI Symbol;Acc:MGI:1932118]
ENSMUSG00000036422	1.39979193465312	5.0788532618157	3.47933102133817	1.45972120234261	0.144366712345839	NA	0	1.97758254923188	6.42116905868684	0	0	0	Pcdh8	protocadherin 8 [Source:MGI Symbol;Acc:MGI:1306800]
ENSMUSG00000037754	1.39979193465312	5.0788532618157	3.47933102133817	1.45972120234261	0.144366712345839	NA	0	1.97758254923188	6.42116905868684	0	0	0	Ppp1r16b	protein phosphatase 1, regulatory subunit 16B [Source:MGI Symbol;Acc:MGI:2151841]
ENSMUSG00000055633	1.39979193465312	5.0788532618157	3.47933102133817	1.45972120234261	0.144366712345839	NA	0	1.97758254923188	6.42116905868684	0	0	0	Zfp580	zinc finger protein 580 [Source:MGI Symbol;Acc:MGI:1916242]
ENSMUSG00000023262	1.39442735215813	5.0738688027514	3.46582635114309	1.46397086544107	0.143201908968026	NA	4.08578474049089	0	4.28077937245789	0	0	0	Acy1	aminoacylase 1 [Source:MGI Symbol;Acc:MGI:87913]
ENSMUSG00000067001	1.39442735215813	5.0738688027514	3.46582635114309	1.46397086544107	0.143201908968026	NA	4.08578474049089	0	4.28077937245789	0	0	0	Serpinb7	serine (or cysteine) peptidase inhibitor, clade B, member 7 [Source:MGI Symbol;Acc:MGI:2151053]
ENSMUSG00000094921	1.39442735215813	5.0738688027514	3.46582635114309	1.46397086544107	0.143201908968026	NA	4.08578474049089	0	4.28077937245789	0	0	0	Vmn2r112	vomeronasal 2, receptor 112 [Source:MGI Symbol;Acc:MGI:3644292]
ENSMUSG00000059248	31.1124673879508	5.07213998432304	1.84699767901517	2.74615395674321	0.00602984598250684	0.0173515026572044	73.544125328836	69.2153892231159	38.527014352121	0	5.38827542363207	0	Septin9	septin 9 [Source:MGI Symbol;Acc:MGI:1858222]
ENSMUSG00000025821	1.37817779949421	5.05855547502164	3.50013524425115	1.44524571824193	0.148388878900726	NA	6.12867711073633	0	2.14038968622895	0	0	0	Zfp282	zinc finger protein 282 [Source:MGI Symbol;Acc:MGI:2141413]
ENSMUSG00000009585	1.37265741182028	5.05315099463601	3.48686014306142	1.44919807142004	0.147282275974194	NA	0	3.95516509846377	4.28077937245789	0	0	0	Apobec3	apolipoprotein B mRNA editing enzyme, catalytic polypeptide 3 [Source:MGI Symbol;Acc:MGI:1933111]
ENSMUSG00000061979	1.37265741182028	5.05315099463601	3.48686014306142	1.44919807142004	0.147282275974194	NA	0	3.95516509846377	4.28077937245789	0	0	0	Rcc1l	reculator of chromosome condensation 1 like [Source:MGI Symbol;Acc:MGI:2137600]
ENSMUSG00000065968	1.37265741182028	5.05315099463601	3.48686014306142	1.44919807142004	0.147282275974194	NA	0	3.95516509846377	4.28077937245789	0	0	0	Ifitm7	interferon induced transmembrane protein 7 [Source:MGI Symbol;Acc:MGI:1921732]
ENSMUSG00000084128	1.37265741182028	5.05315099463601	3.48686014306142	1.44919807142004	0.147282275974194	NA	0	3.95516509846377	4.28077937245789	0	0	0	Esrp2	epithelial splicing regulatory protein 2 [Source:MGI Symbol;Acc:MGI:1924661]
ENSMUSG00000049551	5.43434967836034	5.04921495043555	3.87162634827891	1.30415863934807	0.192179498795011	0.319980436440241	0	31.6413207877101	0	0	0	0.964777282451911	Fzd9	frizzled class receptor 9 [Source:MGI Symbol;Acc:MGI:1313278]
ENSMUSG00000040631	2.72249886113966	5.04445586515288	2.53959342747729	1.9863241929098	0.0469973380024245	0.103599059329343	2.04289237024544	13.8430778446232	0	0	0.449022951969339	0	Dok4	docking protein 4 [Source:MGI Symbol;Acc:MGI:2148865]
ENSMUSG00000020080	1.3619282468303	5.0429137842465	3.86609781322136	1.30439373959982	0.1920993686211	NA	8.17156948098178	0	0	0	0	0	Hkdc1	hexokinase domain containing 1 [Source:MGI Symbol;Acc:MGI:2384910]
ENSMUSG00000022947	1.3619282468303	5.0429137842465	3.86609781322136	1.30439373959982	0.1920993686211	NA	8.17156948098178	0	0	0	0	0	Cbr3	carbonyl reductase 3 [Source:MGI Symbol;Acc:MGI:1309992]
ENSMUSG00000024987	1.3619282468303	5.0429137842465	3.86609781322136	1.30439373959982	0.1920993686211	NA	8.17156948098178	0	0	0	0	0	Cyp26a1	cytochrome P450, family 26, subfamily a, polypeptide 1 [Source:MGI Symbol;Acc:MGI:1096359]
ENSMUSG00000026317	1.3619282468303	5.0429137842465	3.86609781322136	1.30439373959982	0.1920993686211	NA	8.17156948098178	0	0	0	0	0	Cln8	CLN8 transmembrane ER and ERGIC protein [Source:MGI Symbol;Acc:MGI:1349447]
ENSMUSG00000027200	1.3619282468303	5.0429137842465	3.86609781322136	1.30439373959982	0.1920993686211	NA	8.17156948098178	0	0	0	0	0	Sema6d	sema domain, transmembrane domain (TM), and cytoplasmic domain, (semaphorin) 6D [Source:MGI Symbol;Acc:MGI:2387661]
ENSMUSG00000032807	1.3619282468303	5.0429137842465	3.86609781322136	1.30439373959982	0.1920993686211	NA	8.17156948098178	0	0	0	0	0	Alox12b	arachidonate 12-lipoxygenase, 12R type [Source:MGI Symbol;Acc:MGI:1274782]
ENSMUSG00000033033	1.3619282468303	5.0429137842465	3.86609781322136	1.30439373959982	0.1920993686211	NA	8.17156948098178	0	0	0	0	0	Calhm2	calcium homeostasis modulator family member 2 [Source:MGI Symbol;Acc:MGI:1919941]
ENSMUSG00000035105	1.3619282468303	5.0429137842465	3.86609781322136	1.30439373959982	0.1920993686211	NA	8.17156948098178	0	0	0	0	0	Egln3	egl-9 family hypoxia-inducible factor 3 [Source:MGI Symbol;Acc:MGI:1932288]
ENSMUSG00000039315	1.3619282468303	5.0429137842465	3.86609781322136	1.30439373959982	0.1920993686211	NA	8.17156948098178	0	0	0	0	0	Clnk	cytokine-dependent hematopoietic cell linker [Source:MGI Symbol;Acc:MGI:1351468]
ENSMUSG00000039349	1.3619282468303	5.0429137842465	3.86609781322136	1.30439373959982	0.1920993686211	NA	8.17156948098178	0	0	0	0	0	C130074G19Rik	RIKEN cDNA C130074G19 gene [Source:MGI Symbol;Acc:MGI:2444831]
ENSMUSG00000039377	1.3619282468303	5.0429137842465	3.86609781322136	1.30439373959982	0.1920993686211	NA	8.17156948098178	0	0	0	0	0	Hlx	H2.0-like homeobox [Source:MGI Symbol;Acc:MGI:96109]
ENSMUSG00000041143	1.3619282468303	5.0429137842465	3.86609781322136	1.30439373959982	0.1920993686211	NA	8.17156948098178	0	0	0	0	0	Tmco4	transmembrane and coiled-coil domains 4 [Source:MGI Symbol;Acc:MGI:1924306]
ENSMUSG00000041481	1.3619282468303	5.0429137842465	3.86609781322136	1.30439373959982	0.1920993686211	NA	8.17156948098178	0	0	0	0	0	Serpina3g	serine (or cysteine) peptidase inhibitor, clade A, member 3G [Source:MGI Symbol;Acc:MGI:105046]
ENSMUSG00000042647	1.3619282468303	5.0429137842465	3.86609781322136	1.30439373959982	0.1920993686211	NA	8.17156948098178	0	0	0	0	0	Acad12	acyl-Coenzyme A dehydrogenase family, member 12 [Source:MGI Symbol;Acc:MGI:2443320]
ENSMUSG00000043243	1.3619282468303	5.0429137842465	3.86609781322136	1.30439373959982	0.1920993686211	NA	8.17156948098178	0	0	0	0	0	Niban3	niban apoptosis regulator 3 [Source:MGI Symbol;Acc:MGI:3686743]
ENSMUSG00000043740	1.3619282468303	5.0429137842465	3.86609781322136	1.30439373959982	0.1920993686211	NA	8.17156948098178	0	0	0	0	0	B430306N03Rik	RIKEN cDNA B430306N03 gene [Source:MGI Symbol;Acc:MGI:2443478]
ENSMUSG00000053626	1.3619282468303	5.0429137842465	3.86609781322136	1.30439373959982	0.1920993686211	NA	8.17156948098178	0	0	0	0	0	Tll1	tolloid-like [Source:MGI Symbol;Acc:MGI:106923]
ENSMUSG00000058207	1.3619282468303	5.0429137842465	3.86609781322136	1.30439373959982	0.1920993686211	NA	8.17156948098178	0	0	0	0	0	Serpina3k	serine (or cysteine) peptidase inhibitor, clade A, member 3K [Source:MGI Symbol;Acc:MGI:98377]
ENSMUSG00000061808	1.3619282468303	5.0429137842465	3.86609781322136	1.30439373959982	0.1920993686211	NA	8.17156948098178	0	0	0	0	0	Ttr	transthyretin [Source:MGI Symbol;Acc:MGI:98865]
ENSMUSG00000062464	1.3619282468303	5.0429137842465	3.86609781322136	1.30439373959982	0.1920993686211	NA	8.17156948098178	0	0	0	0	0	Cyp4f37	cytochrome P450, family 4, subfamily f, polypeptide 37 [Source:MGI Symbol;Acc:MGI:3780112]
ENSMUSG00000062713	1.3619282468303	5.0429137842465	3.86609781322136	1.30439373959982	0.1920993686211	NA	8.17156948098178	0	0	0	0	0	Sim2	single-minded family bHLH transcription factor 2 [Source:MGI Symbol;Acc:MGI:98307]
ENSMUSG00000074754	1.3619282468303	5.0429137842465	3.86609781322136	1.30439373959982	0.1920993686211	NA	8.17156948098178	0	0	0	0	0	Smim26	small integral membrane protein 26 [Source:MGI Symbol;Acc:MGI:2685407]
ENSMUSG00000079357	1.3619282468303	5.0429137842465	3.86609781322136	1.30439373959982	0.1920993686211	NA	8.17156948098178	0	0	0	0	0	Gm11100	predicted gene 11100 [Source:MGI Symbol;Acc:MGI:3779338]
ENSMUSG00000091034	1.3619282468303	5.0429137842465	3.86609781322136	1.30439373959982	0.1920993686211	NA	8.17156948098178	0	0	0	0	0	Scpppq1	secretory calcium-binding phosphoprotein proline-glutamine rich 1 [Source:MGI Symbol;Acc:MGI:4937294]
ENSMUSG00000095918	1.3619282468303	5.0429137842465	3.86609781322136	1.30439373959982	0.1920993686211	NA	8.17156948098178	0	0	0	0	0	Gm5861	predicted gene 5861 [Source:MGI Symbol;Acc:MGI:3644254]
ENSMUSG00000118653	1.3619282468303	5.0429137842465	3.86609781322136	1.30439373959982	0.1920993686211	NA	8.17156948098178	0	0	0	0	0	Ube2srt	ubiquitin-conjugating enzyme E2S, retrotransposed [Source:MGI Symbol;Acc:MGI:3780467]
ENSMUSG00000020453	2.71161389097073	5.03819521751587	2.74907503480198	1.83268741439747	0.0668490700004414	0.138175483396292	0	15.8206603938551	0	0	0.449022951969339	0	Patz1	POZ (BTB) and AT hook containing zinc finger 1 [Source:MGI Symbol;Acc:MGI:1891832]
ENSMUSG00000024339	1.35104327666137	5.03249491020498	3.52682302109058	1.42692017152843	0.153602905834885	NA	6.12867711073633	1.97758254923188	0	0	0	0	Tap2	transporter 2, ATP-binding cassette, sub-family B (MDR/TAP) [Source:MGI Symbol;Acc:MGI:98484]
ENSMUSG00000026932	1.35104327666137	5.03249491020498	3.52682302109058	1.42692017152843	0.153602905834885	NA	6.12867711073633	1.97758254923188	0	0	0	0	Nacc2	nucleus accumbens associated 2, BEN and BTB (POZ) domain containing [Source:MGI Symbol;Acc:MGI:1915241]
ENSMUSG00000041708	1.35104327666137	5.03249491020498	3.52682302109058	1.42692017152843	0.153602905834885	NA	6.12867711073633	1.97758254923188	0	0	0	0	Mpped1	metallophosphoesterase domain containing 1 [Source:MGI Symbol;Acc:MGI:106316]
ENSMUSG00000045053	1.35104327666137	5.03249491020498	3.52682302109058	1.42692017152843	0.153602905834885	NA	6.12867711073633	1.97758254923188	0	0	0	0	Kcng3	potassium voltage-gated channel, subfamily G, member 3 [Source:MGI Symbol;Acc:MGI:2663923]
ENSMUSG00000020032	1.34552288898743	5.02699842811416	3.53233465394025	1.42313764708183	0.154696256729084	NA	0	5.93274764769565	2.14038968622895	0	0	0	Nuak1	NUAK family, SNF1-like kinase, 1 [Source:MGI Symbol;Acc:MGI:1925226]
ENSMUSG00000034164	1.34552288898743	5.02699842811416	3.53233465394025	1.42313764708183	0.154696256729084	NA	0	5.93274764769565	2.14038968622895	0	0	0	Emid1	EMI domain containing 1 [Source:MGI Symbol;Acc:MGI:2155091]
ENSMUSG00000050627	1.34552288898743	5.02699842811416	3.53233465394025	1.42313764708183	0.154696256729084	NA	0	5.93274764769565	2.14038968622895	0	0	0	Gpd1l	glycerol-3-phosphate dehydrogenase 1-like [Source:MGI Symbol;Acc:MGI:1289257]
ENSMUSG00000026641	5.03553463237156	5.02465912596186	1.82956208244095	2.74637257417256	0.00602582891964967	0.0173439560920349	10.2144618512272	1.97758254923188	17.1231174898316	0	0.898045903938679	0	Usf1	upstream transcription factor 1 [Source:MGI Symbol;Acc:MGI:99542]
ENSMUSG00000019158	1.34015830649244	5.02189448084431	3.51905500220296	1.42705768386699	0.153563268415884	NA	4.08578474049089	3.95516509846377	0	0	0	0	Tmem160	transmembrane protein 160 [Source:MGI Symbol;Acc:MGI:1916344]
ENSMUSG00000027831	1.34015830649244	5.02189448084431	3.51905500220296	1.42705768386699	0.153563268415884	NA	4.08578474049089	3.95516509846377	0	0	0	0	Veph1	ventricular zone expressed PH domain-containing 1 [Source:MGI Symbol;Acc:MGI:1920039]
ENSMUSG00000044792	1.34015830649244	5.02189448084431	3.51905500220296	1.42705768386699	0.153563268415884	NA	4.08578474049089	3.95516509846377	0	0	0	0	Isca1	iron-sulfur cluster assembly 1 [Source:MGI Symbol;Acc:MGI:1916296]
ENSMUSG00000047586	1.34015830649244	5.02189448084431	3.51905500220296	1.42705768386699	0.153563268415884	NA	4.08578474049089	3.95516509846377	0	0	0	0	Nccrp1	non-specific cytotoxic cell receptor protein 1 homolog (zebrafish) [Source:MGI Symbol;Acc:MGI:2685009]
ENSMUSG00000059852	1.34015830649244	5.02189448084431	3.51905500220296	1.42705768386699	0.153563268415884	NA	4.08578474049089	3.95516509846377	0	0	0	0	Kcng2	potassium voltage-gated channel, subfamily G, member 2 [Source:MGI Symbol;Acc:MGI:3694646]
ENSMUSG00000040350	12.0279962503987	5.01214615891971	1.14113473462454	4.39224747686681	1.12184896192677e-05	5.06808410442545e-05	32.6862779239271	13.8430778446232	23.5442865485184	2.0943351853235	0	0	Trim7	tripartite motif-containing 7 [Source:MGI Symbol;Acc:MGI:2137353]
ENSMUSG00000015879	1.32927333632352	5.01115222900112	3.5487204189881	1.41210116248888	0.157920176529703	NA	2.04289237024544	5.93274764769565	0	0	0	0	Fam184b	family with sequence similarity 184, member B [Source:MGI Symbol;Acc:MGI:2442958]
ENSMUSG00000017943	1.32927333632352	5.01115222900112	3.5487204189881	1.41210116248888	0.157920176529703	NA	2.04289237024544	5.93274764769565	0	0	0	0	Gdap1l1	ganglioside-induced differentiation-associated protein 1-like 1 [Source:MGI Symbol;Acc:MGI:2385163]
ENSMUSG00000041165	1126.72741151483	5.00982829354045	0.111935996167378	44.7561862588799	0	0	2212.45243697582	2208.95970749201	2136.10890685649	79.1658700052282	62.4141903237382	61.2633574356963	Spem1	spermatid maturation 1 [Source:MGI Symbol;Acc:MGI:1921538]
ENSMUSG00000013611	1.31838836615459	4.99945701176173	3.9157574644459	1.27675349077555	0.20168929014841	NA	0	7.91033019692753	0	0	0	0	Snx31	sorting nexin 31 [Source:MGI Symbol;Acc:MGI:1913946]
ENSMUSG00000017491	1.31838836615459	4.99945701176173	3.9157574644459	1.27675349077555	0.20168929014841	NA	0	7.91033019692753	0	0	0	0	Rarb	retinoic acid receptor, beta [Source:MGI Symbol;Acc:MGI:97857]
ENSMUSG00000020142	1.31838836615459	4.99945701176173	3.9157574644459	1.27675349077555	0.20168929014841	NA	0	7.91033019692753	0	0	0	0	Slc1a4	solute carrier family 1 (glutamate/neutral amino acid transporter), member 4 [Source:MGI Symbol;Acc:MGI:2135601]
ENSMUSG00000021057	1.31838836615459	4.99945701176173	3.9157574644459	1.27675349077555	0.20168929014841	NA	0	7.91033019692753	0	0	0	0	Akap5	A kinase anchor protein 5 [Source:MGI Symbol;Acc:MGI:2685104]
ENSMUSG00000021367	1.31838836615459	4.99945701176173	3.9157574644459	1.27675349077555	0.20168929014841	NA	0	7.91033019692753	0	0	0	0	Edn1	endothelin 1 [Source:MGI Symbol;Acc:MGI:95283]
ENSMUSG00000021708	1.31838836615459	4.99945701176173	3.9157574644459	1.27675349077555	0.20168929014841	NA	0	7.91033019692753	0	0	0	0	Rasgrf2	RAS protein-specific guanine nucleotide-releasing factor 2 [Source:MGI Symbol;Acc:MGI:109137]
ENSMUSG00000022297	1.31838836615459	4.99945701176173	3.9157574644459	1.27675349077555	0.20168929014841	NA	0	7.91033019692753	0	0	0	0	Fzd6	frizzled class receptor 6 [Source:MGI Symbol;Acc:MGI:108474]
ENSMUSG00000022340	1.31838836615459	4.99945701176173	3.9157574644459	1.27675349077555	0.20168929014841	NA	0	7.91033019692753	0	0	0	0	Sybu	syntabulin (syntaxin-interacting) [Source:MGI Symbol;Acc:MGI:2442392]
ENSMUSG00000028051	1.31838836615459	4.99945701176173	3.9157574644459	1.27675349077555	0.20168929014841	NA	0	7.91033019692753	0	0	0	0	Hcn3	hyperpolarization-activated, cyclic nucleotide-gated K+ 3 [Source:MGI Symbol;Acc:MGI:1298211]
ENSMUSG00000028680	1.31838836615459	4.99945701176173	3.9157574644459	1.27675349077555	0.20168929014841	NA	0	7.91033019692753	0	0	0	0	Plk3	polo like kinase 3 [Source:MGI Symbol;Acc:MGI:109604]
ENSMUSG00000031320	1.31838836615459	4.99945701176173	3.9157574644459	1.27675349077555	0.20168929014841	NA	0	7.91033019692753	0	0	0	0	Rps4x	ribosomal protein S4, X-linked [Source:MGI Symbol;Acc:MGI:98158]
ENSMUSG00000032593	1.31838836615459	4.99945701176173	3.9157574644459	1.27675349077555	0.20168929014841	NA	0	7.91033019692753	0	0	0	0	Amigo3	adhesion molecule with Ig like domain 3 [Source:MGI Symbol;Acc:MGI:2444854]
ENSMUSG00000033063	1.31838836615459	4.99945701176173	3.9157574644459	1.27675349077555	0.20168929014841	NA	0	7.91033019692753	0	0	0	0	Cntnap3	contactin associated protein-like 3 [Source:MGI Symbol;Acc:MGI:3588199]
ENSMUSG00000033770	1.31838836615459	4.99945701176173	3.9157574644459	1.27675349077555	0.20168929014841	NA	0	7.91033019692753	0	0	0	0	Clcnka	chloride channel, voltage-sensitive Ka [Source:MGI Symbol;Acc:MGI:1329026]
ENSMUSG00000039620	1.31838836615459	4.99945701176173	3.9157574644459	1.27675349077555	0.20168929014841	NA	0	7.91033019692753	0	0	0	0	Trmt9b	tRNA methyltransferase 9B [Source:MGI Symbol;Acc:MGI:2442328]
ENSMUSG00000040613	1.31838836615459	4.99945701176173	3.9157574644459	1.27675349077555	0.20168929014841	NA	0	7.91033019692753	0	0	0	0	Apobec1	apolipoprotein B mRNA editing enzyme, catalytic polypeptide 1 [Source:MGI Symbol;Acc:MGI:103298]
ENSMUSG00000042372	1.31838836615459	4.99945701176173	3.9157574644459	1.27675349077555	0.20168929014841	NA	0	7.91033019692753	0	0	0	0	Dmrt3	doublesex and mab-3 related transcription factor 3 [Source:MGI Symbol;Acc:MGI:2449470]
ENSMUSG00000045767	1.31838836615459	4.99945701176173	3.9157574644459	1.27675349077555	0.20168929014841	NA	0	7.91033019692753	0	0	0	0	B230219D22Rik	RIKEN cDNA B230219D22 gene [Source:MGI Symbol;Acc:MGI:1925771]
ENSMUSG00000045991	1.31838836615459	4.99945701176173	3.9157574644459	1.27675349077555	0.20168929014841	NA	0	7.91033019692753	0	0	0	0	Onecut2	one cut domain, family member 2 [Source:MGI Symbol;Acc:MGI:1891408]
ENSMUSG00000046168	1.31838836615459	4.99945701176173	3.9157574644459	1.27675349077555	0.20168929014841	NA	0	7.91033019692753	0	0	0	0	Kcnrg	potassium channel regulator [Source:MGI Symbol;Acc:MGI:2685591]
ENSMUSG00000048200	1.31838836615459	4.99945701176173	3.9157574644459	1.27675349077555	0.20168929014841	NA	0	7.91033019692753	0	0	0	0	Cracr2b	calcium release activated channel regulator 2B [Source:MGI Symbol;Acc:MGI:2446129]
ENSMUSG00000050541	1.31838836615459	4.99945701176173	3.9157574644459	1.27675349077555	0.20168929014841	NA	0	7.91033019692753	0	0	0	0	Adra1b	adrenergic receptor, alpha 1b [Source:MGI Symbol;Acc:MGI:104774]
ENSMUSG00000050708	1.31838836615459	4.99945701176173	3.9157574644459	1.27675349077555	0.20168929014841	NA	0	7.91033019692753	0	0	0	0	Ftl1	ferritin light polypeptide 1 [Source:MGI Symbol;Acc:MGI:95589]
ENSMUSG00000053398	1.31838836615459	4.99945701176173	3.9157574644459	1.27675349077555	0.20168929014841	NA	0	7.91033019692753	0	0	0	0	Phgdh	3-phosphoglycerate dehydrogenase [Source:MGI Symbol;Acc:MGI:1355330]
ENSMUSG00000054676	1.31838836615459	4.99945701176173	3.9157574644459	1.27675349077555	0.20168929014841	NA	0	7.91033019692753	0	0	0	0	1600014C10Rik	RIKEN cDNA 1600014C10 gene [Source:MGI Symbol;Acc:MGI:1919494]
ENSMUSG00000057228	1.31838836615459	4.99945701176173	3.9157574644459	1.27675349077555	0.20168929014841	NA	0	7.91033019692753	0	0	0	0	Aadat	aminoadipate aminotransferase [Source:MGI Symbol;Acc:MGI:1345167]
ENSMUSG00000059434	1.31838836615459	4.99945701176173	3.9157574644459	1.27675349077555	0.20168929014841	NA	0	7.91033019692753	0	0	0	0	Gckr	glucokinase regulatory protein [Source:MGI Symbol;Acc:MGI:1096345]
ENSMUSG00000070385	1.31838836615459	4.99945701176173	3.9157574644459	1.27675349077555	0.20168929014841	NA	0	7.91033019692753	0	0	0	0	Ampd1	adenosine monophosphate deaminase 1 [Source:MGI Symbol;Acc:MGI:88015]
ENSMUSG00000071379	1.31838836615459	4.99945701176173	3.9157574644459	1.27675349077555	0.20168929014841	NA	0	7.91033019692753	0	0	0	0	Hpcal1	hippocalcin-like 1 [Source:MGI Symbol;Acc:MGI:1855689]
ENSMUSG00000075378	1.31838836615459	4.99945701176173	3.9157574644459	1.27675349077555	0.20168929014841	NA	0	7.91033019692753	0	0	0	0	Or12k8	olfactory receptor family 12 subfamily K member 8 [Source:MGI Symbol;Acc:MGI:3030195]
ENSMUSG00000090738	1.31838836615459	4.99945701176173	3.9157574644459	1.27675349077555	0.20168929014841	NA	0	7.91033019692753	0	0	0	0	Pate7	prostate and testis expressed 7 [Source:MGI Symbol;Acc:MGI:4937361]
ENSMUSG00000101678	1.31838836615459	4.99945701176173	3.9157574644459	1.27675349077555	0.20168929014841	NA	0	7.91033019692753	0	0	0	0	Gm29609	predicted gene 29609 [Source:MGI Symbol;Acc:MGI:5580315]
ENSMUSG00000108763	1.31838836615459	4.99945701176173	3.9157574644459	1.27675349077555	0.20168929014841	NA	0	7.91033019692753	0	0	0	0	Btnl12	butyrophilin-like 12 [Source:MGI Symbol;Acc:MGI:5595187]
ENSMUSG00000121577	1.31838836615459	4.99945701176173	3.9157574644459	1.27675349077555	0.20168929014841	NA	0	7.91033019692753	0	0	0	0		novel protein
ENSMUSG00000121607	1.31838836615459	4.99945701176173	3.9157574644459	1.27675349077555	0.20168929014841	NA	0	7.91033019692753	0	0	0	0		neuroligin 4-like
ENSMUSG00000039652	465.164317769564	4.98554303732454	0.194313079960256	25.6572693837403	3.50773570085838e-145	2.14904970007762e-143	968.330983496341	794.988184791217	941.771461940737	25.5508892609467	18.8589639827123	41.4854231454322	Cpeb3	cytoplasmic polyadenylation element binding protein 3 [Source:MGI Symbol;Acc:MGI:2443075]
ENSMUSG00000031539	6.99699320198808	4.96880991025244	1.48100559933007	3.35502439187271	0.000793579868574207	0.00273060639356804	16.3431389619636	15.8206603938551	8.56155874491579	1.2566011111941	0	0	Ap3m2	adaptor-related protein complex 3, mu 2 subunit [Source:MGI Symbol;Acc:MGI:1929214]
ENSMUSG00000022178	5.04129194629544	4.96593359410286	1.94285710739954	2.55599527890634	0.0105884555457555	0.0286715919056306	14.3002465917181	0	14.9827278036026	0	0	0.964777282451911	Ajuba	ajuba LIM protein [Source:MGI Symbol;Acc:MGI:1341886]
ENSMUSG00000038485	1875.49032105309	4.96406442881789	0.0938067586977527	52.917982645709	0	0	3624.09106481542	3573.49166646201	3705.01454686231	95.9205514878162	127.073495407323	127.350601283652	Socs7	suppressor of cytokine signaling 7 [Source:MGI Symbol;Acc:MGI:2651588]
ENSMUSG00000047518	1290.2426375957	4.96003792681984	0.115933310901299	42.783544162235	0	0	2645.54561946785	2290.04059201052	2564.18684410228	63.6677896338343	90.7026362978065	87.3123440618979	Slfnl1	schlafen like 1 [Source:MGI Symbol;Acc:MGI:3045330]
ENSMUSG00000011350	336.93222958299	4.95885057289157	0.19088065109962	25.9788016455558	8.59828610770996e-149	5.37371277997933e-147	676.197374551242	622.938503008043	659.240023358516	20.1056177791056	17.0628721748349	26.0489866262016	Gm5893	predicted gene 5893 [Source:MGI Symbol;Acc:MGI:3645761]
ENSMUSG00000070529	62.0958073670414	4.95566986333593	1.23470157445616	4.01365800923896	5.97849493162707e-05	0.000244185686254995	136.873788806445	112.722205306217	111.300263683905	2.5132022223882	0	9.16538418329315	Wfdc10	WAP four-disulfide core domain 10 [Source:MGI Symbol;Acc:MGI:3616889]
ENSMUSG00000049357	21.6967280866483	4.94300332038135	0.807776205417195	6.11927324329691	9.40030933052252e-10	6.06388211326289e-09	65.3725558478542	43.5068160831014	17.1231174898316	0.418867037064699	1.34706885590802	2.41194320612978	Brd8dc	BRD8 domain containing [Source:MGI Symbol;Acc:MGI:3045347]
ENSMUSG00000066513	7.30960243761561	4.92343186066471	1.53271795554946	3.21222299434715	0.00131712097258182	0.00434435864224853	22.4718160726999	17.7982429430869	2.14038968622895	0	0	1.44716592367787	Klk1b4	kallikrein 1-related pepidase b4 [Source:MGI Symbol;Acc:MGI:97320]
ENSMUSG00000042797	878.030565432802	4.92247294152947	0.123710161369637	39.7903687702861	0	0	1691.51488256323	1657.21417625632	1750.83876333528	54.0338477813462	48.4944788126887	66.0872438479559	Aqp11	aquaporin 11 [Source:MGI Symbol;Acc:MGI:1913583]
ENSMUSG00000001844	75.2034307945466	4.9222022664191	1.30884781892428	3.76071396173817	0.000169429082800196	0.000648565559490931	100.101726142027	148.318691192391	188.354292388147	3.35093629651759	0	11.094938748197	Zdhhc4	zinc finger, DHHC domain containing 4 [Source:MGI Symbol;Acc:MGI:1920131]
ENSMUSG00000009471	12.1730636540216	4.92007540478275	1.14887541810434	4.28251429811333	1.84793253478722e-05	8.11250862518486e-05	24.5147084429453	11.8654952953913	34.2462349796631	0	0	2.41194320612978	Myod1	myogenic differentiation 1 [Source:MGI Symbol;Acc:MGI:97275]
ENSMUSG00000031171	4.68416760049506	4.9169091258272	1.85219708589294	2.65463603375488	0.0079394020537481	0.0220998977937478	6.12867711073633	3.95516509846377	17.1231174898316	0	0.898045903938679	0	Ftsj1	FtsJ RNA 2'-O-methyltransferase 1 [Source:MGI Symbol;Acc:MGI:1859648]
ENSMUSG00000049008	435.57155548623	4.89818602739943	0.20151888095332	24.3063379680738	1.68003624407843e-130	9.28649367449041e-129	827.371409949405	757.414116355811	943.911851626966	21.7810859273644	42.2081574851179	20.7427115727161	BB014433	expressed sequence BB014433 [Source:MGI Symbol;Acc:MGI:2142823]
ENSMUSG00000036046	448.798916395689	4.89068338082199	0.16542047488273	29.5651634677575	4.1927780136415e-192	3.43063027339864e-190	872.315042094805	842.450165972782	890.402109471242	28.4829585203996	35.0237902536085	24.1194320612978	5031439G07Rik	RIKEN cDNA 5031439G07 gene [Source:MGI Symbol;Acc:MGI:2444899]
ENSMUSG00000026778	399.683166633306	4.8831800607834	0.563845306375725	8.66049607146936	4.69715629031376e-18	4.81603732750472e-17	690.49762114296	907.710390097434	721.311324259155	37.2791662987582	8.98045903938679	32.320038962139	Prkcq	protein kinase C, theta [Source:MGI Symbol;Acc:MGI:97601]
ENSMUSG00000053080	4.76580809524354	4.87688356010408	2.03098076619196	2.40124556632219	0.0163393674198893	0.0419860976448684	4.08578474049089	0	23.5442865485184	0	0	0.964777282451911	Zfta	zinc finger translocation associated [Source:MGI Symbol;Acc:MGI:1919667]
ENSMUSG00000006728	8.74208016053723	4.87600034094037	1.34729722867702	3.61909772925784	0.000295631984165338	0.00109427826995962	26.5576008131908	17.7982429430869	6.42116905868684	1.6754681482588	0	0	Cdk4	cyclin dependent kinase 4 [Source:MGI Symbol;Acc:MGI:88357]
ENSMUSG00000005802	234.001686727199	4.87329484261419	0.252584162874732	19.2937466353783	6.0617112606366e-83	2.0654658342065e-81	355.463272422707	462.75431652026	539.378200929695	17.1735485196527	8.98045903938679	20.2603229314901	Slc30a4	solute carrier family 30 (zinc transporter), member 4 [Source:MGI Symbol;Acc:MGI:1345282]
ENSMUSG00000049692	150.047622165175	4.86941551640125	0.890457959365798	5.46843954302946	4.54014869259672e-08	2.54834444550388e-07	202.246344654299	306.525295130942	361.725856972692	2.5132022223882	22.451147598467	4.82388641225955	Tmem239	transmembrane 239 [Source:MGI Symbol;Acc:MGI:1914016]
ENSMUSG00000032968	123.819906194801	4.86291882737053	0.340042361942455	14.3009206252763	2.15933960560294e-46	4.51356414703928e-45	288.047824204608	261.040896498609	169.090785212087	10.0528088895528	3.59218361575472	11.094938748197	Inha	inhibin alpha [Source:MGI Symbol;Acc:MGI:96569]
ENSMUSG00000041550	51.3474672325955	4.84086050287795	0.484222625305364	9.99717949946097	1.5679937034843e-23	2.00217019406923e-22	81.7156948098178	81.0808845185072	134.844550232424	2.0943351853235	4.49022951969339	3.85910912980764	Serpina5	serine (or cysteine) peptidase inhibitor, clade A, member 5 [Source:MGI Symbol;Acc:MGI:107817]
ENSMUSG00000044986	15.8340511335501	4.83945831177467	0.943093177730415	5.13147420217904	2.87481631544511e-07	1.51052346916734e-06	14.3002465917181	47.4619811815652	29.9654556072053	0	1.34706885590802	1.92955456490382	Tst	thiosulfate sulfurtransferase, mitochondrial [Source:MGI Symbol;Acc:MGI:98852]
ENSMUSG00000036002	191.611008039177	4.82066124060177	0.247612320163447	19.4685839437217	2.02800554940696e-84	7.0061958383262e-83	400.406904568107	395.516509846376	314.637283875655	16.3358144455233	11.6745967512028	11.094938748197	Atosb	atos homolog B [Source:MGI Symbol;Acc:MGI:2441854]
ENSMUSG00000068522	113.585127258723	4.81401971647727	0.73210873497586	6.57555290149079	4.84727052199089e-11	3.39063574139486e-10	234.932622578226	187.870342177029	235.442865485184	15.4980803713939	5.83729837560141	1.92955456490382	Aard	alanine and arginine rich domain containing protein [Source:MGI Symbol;Acc:MGI:2181621]
ENSMUSG00000028007	19.5819966928235	4.81120069354845	1.75994751482338	2.73371828024728	0.006262359966002	0.0179334494352215	38.8149550346634	55.3723113784927	19.2635071760605	0	4.04120656772405	0	Snx7	sorting nexin 7 [Source:MGI Symbol;Acc:MGI:1923811]
ENSMUSG00000051437	939.925890097345	4.79457541563393	0.121344801567356	39.5119968363256	0	0	1746.67297655985	1858.92759627797	1838.59474047067	74.9771996345812	67.8024657473702	52.5803618936291	Ubqlnl	ubiquilin-like [Source:MGI Symbol;Acc:MGI:2685336]
ENSMUSG00000036918	719.296262871408	4.77347223623533	0.154038153414496	30.9888954809174	7.60780081522999e-211	7.06106109992652e-209	1470.88250657672	1382.33020191309	1309.91848797212	36.0225651875641	66.4553968914622	50.1684186874994	Ttc7	tetratricopeptide repeat domain 7 [Source:MGI Symbol;Acc:MGI:1920999]
ENSMUSG00000042854	29.1357654803829	4.77281263788889	0.693246973167739	6.88472192829042	5.79005231802241e-12	4.33539317755838e-11	26.5576008131908	92.9463798138985	49.2289627832658	3.76980333358229	1.34706885590802	0.964777282451911	Trp53rkb	transformation related protein 53 regulating kinase B [Source:MGI Symbol;Acc:MGI:1914050]
ENSMUSG00000075595	22.6920294280911	4.76833278312997	0.757573597064393	6.29421722405232	3.08954925635564e-10	2.06030692232146e-09	51.0723092561361	37.5740684354058	42.8077937245789	3.35093629651759	1.34706885590802	0	Zfp652	zinc finger protein 652 [Source:MGI Symbol;Acc:MGI:2442221]
ENSMUSG00000067144	4.19245413953029	4.75606335054091	1.98329686040892	2.39805923433989	0.0164821996212843	0.0423181496056799	16.3431389619636	7.91033019692753	0	0.418867037064699	0	0.482388641225955	Slc22a7	solute carrier family 22 (organic anion transporter), member 7 [Source:MGI Symbol;Acc:MGI:1859559]
ENSMUSG00000076431	5.94289210635858	4.7330625143026	1.63202201735452	2.90012172873428	0.00373017766805857	0.011309658619611	4.08578474049089	21.7534080415507	8.56155874491579	1.2566011111941	0	0	Sox4	SRY (sex determining region Y)-box 4 [Source:MGI Symbol;Acc:MGI:98366]
ENSMUSG00000074435	3103.88165223216	4.73280469792202	0.283893693534338	16.6710455558237	2.12838767272011e-62	5.7796413724061e-61	5910.08762712007	5976.25446377875	6061.58359140038	150.373266306227	218.674177609068	306.316787178482	Smcp	sperm mitochondria-associated cysteine-rich protein [Source:MGI Symbol;Acc:MGI:96945]
ENSMUSG00000001827	8.50894404559283	4.71892042251235	1.31996832910355	3.57502548998064	0.000350193775861877	0.00127868962101908	16.3431389619636	17.7982429430869	14.9827278036026	0	0	1.92955456490382	Folr1	folate receptor alpha [Source:MGI Symbol;Acc:MGI:95568]
ENSMUSG00000098557	13.7230039047548	4.71829672310689	1.09964329561523	4.29075204834228	1.78069050227782e-05	7.83945054047054e-05	10.2144618512272	43.5068160831014	25.6846762347474	2.9320692594529	0	0	Kctd12	potassium channel tetramerisation domain containing 12 [Source:MGI Symbol;Acc:MGI:2145823]
ENSMUSG00000006575	185.691603599689	4.71506033445001	0.302806286360575	15.5712101988378	1.14225430347724e-54	2.82992365982996e-53	400.406904568107	433.090578281782	239.723644857642	8.79620777835869	22.0021246464976	10.1301614657451	Rundc3a	RUN domain containing 3A [Source:MGI Symbol;Acc:MGI:1858752]
ENSMUSG00000060260	1247.66075482781	4.70223249902309	0.0985393957113371	47.7193153568536	0	0	2439.21349007306	2454.17994359677	2315.90164049972	96.7582855619455	91.1516592497759	88.7595099855758	Pwwp2b	PWWP domain containing 2B [Source:MGI Symbol;Acc:MGI:2142008]
ENSMUSG00000002233	1.07019484311447	4.68923118388441	3.99134663588557	1.17484939587163	0.2400549740396	NA	0	0	6.42116905868684	0	0	0	Rhoc	ras homolog family member C [Source:MGI Symbol;Acc:MGI:106028]
ENSMUSG00000005891	1.07019484311447	4.68923118388441	3.99134663588557	1.17484939587163	0.2400549740396	NA	0	0	6.42116905868684	0	0	0	Prl4a1	prolactin family 4, subfamily a, member 1 [Source:MGI Symbol;Acc:MGI:1206587]
ENSMUSG00000008668	1.07019484311447	4.68923118388441	3.99134663588557	1.17484939587163	0.2400549740396	NA	0	0	6.42116905868684	0	0	0	Rps18	ribosomal protein S18 [Source:MGI Symbol;Acc:MGI:98146]
ENSMUSG00000009216	1.07019484311447	4.68923118388441	3.99134663588557	1.17484939587163	0.2400549740396	NA	0	0	6.42116905868684	0	0	0	Fam163b	family with sequence similarity 163, member B [Source:MGI Symbol;Acc:MGI:1926106]
ENSMUSG00000019846	1.07019484311447	4.68923118388441	3.99134663588557	1.17484939587163	0.2400549740396	NA	0	0	6.42116905868684	0	0	0	Lama4	laminin, alpha 4 [Source:MGI Symbol;Acc:MGI:109321]
ENSMUSG00000020875	1.07019484311447	4.68923118388441	3.99134663588557	1.17484939587163	0.2400549740396	NA	0	0	6.42116905868684	0	0	0	Hoxb9	homeobox B9 [Source:MGI Symbol;Acc:MGI:96190]
ENSMUSG00000024901	1.07019484311447	4.68923118388441	3.99134663588557	1.17484939587163	0.2400549740396	NA	0	0	6.42116905868684	0	0	0	Peli3	pellino 3 [Source:MGI Symbol;Acc:MGI:1924963]
ENSMUSG00000025014	1.07019484311447	4.68923118388441	3.99134663588557	1.17484939587163	0.2400549740396	NA	0	0	6.42116905868684	0	0	0	Dntt	deoxynucleotidyltransferase, terminal [Source:MGI Symbol;Acc:MGI:98659]
ENSMUSG00000025496	1.07019484311447	4.68923118388441	3.99134663588557	1.17484939587163	0.2400549740396	NA	0	0	6.42116905868684	0	0	0	Drd4	dopamine receptor D4 [Source:MGI Symbol;Acc:MGI:94926]
ENSMUSG00000027377	1.07019484311447	4.68923118388441	3.99134663588557	1.17484939587163	0.2400549740396	NA	0	0	6.42116905868684	0	0	0	Mall	mal, T cell differentiation protein-like [Source:MGI Symbol;Acc:MGI:2385152]
ENSMUSG00000030049	1.07019484311447	4.68923118388441	3.99134663588557	1.17484939587163	0.2400549740396	NA	0	0	6.42116905868684	0	0	0	Gkn2	gastrokine 2 [Source:MGI Symbol;Acc:MGI:1913534]
ENSMUSG00000030134	1.07019484311447	4.68923118388441	3.99134663588557	1.17484939587163	0.2400549740396	NA	0	0	6.42116905868684	0	0	0	Rasgef1a	RasGEF domain family, member 1A [Source:MGI Symbol;Acc:MGI:1917977]
ENSMUSG00000030532	1.07019484311447	4.68923118388441	3.99134663588557	1.17484939587163	0.2400549740396	NA	0	0	6.42116905868684	0	0	0	Hddc3	HD domain containing 3 [Source:MGI Symbol;Acc:MGI:1915945]
ENSMUSG00000030745	1.07019484311447	4.68923118388441	3.99134663588557	1.17484939587163	0.2400549740396	NA	0	0	6.42116905868684	0	0	0	Il21r	interleukin 21 receptor [Source:MGI Symbol;Acc:MGI:1890475]
ENSMUSG00000031981	1.07019484311447	4.68923118388441	3.99134663588557	1.17484939587163	0.2400549740396	NA	0	0	6.42116905868684	0	0	0	Capn9	calpain 9 [Source:MGI Symbol;Acc:MGI:1920897]
ENSMUSG00000035183	1.07019484311447	4.68923118388441	3.99134663588557	1.17484939587163	0.2400549740396	NA	0	0	6.42116905868684	0	0	0	Slc24a5	solute carrier family 24, member 5 [Source:MGI Symbol;Acc:MGI:2677271]
ENSMUSG00000035513	1.07019484311447	4.68923118388441	3.99134663588557	1.17484939587163	0.2400549740396	NA	0	0	6.42116905868684	0	0	0	Ntng2	netrin G2 [Source:MGI Symbol;Acc:MGI:2159341]
ENSMUSG00000036611	1.07019484311447	4.68923118388441	3.99134663588557	1.17484939587163	0.2400549740396	NA	0	0	6.42116905868684	0	0	0	Eepd1	endonuclease/exonuclease/phosphatase family domain containing 1 [Source:MGI Symbol;Acc:MGI:1914734]
ENSMUSG00000037362	1.07019484311447	4.68923118388441	3.99134663588557	1.17484939587163	0.2400549740396	NA	0	0	6.42116905868684	0	0	0	Ccn3	cellular communication network factor 3 [Source:MGI Symbol;Acc:MGI:109185]
ENSMUSG00000039908	1.07019484311447	4.68923118388441	3.99134663588557	1.17484939587163	0.2400549740396	NA	0	0	6.42116905868684	0	0	0	Slc26a11	solute carrier family 26, member 11 [Source:MGI Symbol;Acc:MGI:2444589]
ENSMUSG00000040009	1.07019484311447	4.68923118388441	3.99134663588557	1.17484939587163	0.2400549740396	NA	0	0	6.42116905868684	0	0	0	Gnaz	guanine nucleotide binding protein, alpha z subunit [Source:MGI Symbol;Acc:MGI:95780]
ENSMUSG00000040841	1.07019484311447	4.68923118388441	3.99134663588557	1.17484939587163	0.2400549740396	NA	0	0	6.42116905868684	0	0	0	Six5	sine oculis-related homeobox 5 [Source:MGI Symbol;Acc:MGI:106220]
ENSMUSG00000045532	1.07019484311447	4.68923118388441	3.99134663588557	1.17484939587163	0.2400549740396	NA	0	0	6.42116905868684	0	0	0	C1ql1	complement component 1, q subcomponent-like 1 [Source:MGI Symbol;Acc:MGI:1344400]
ENSMUSG00000045730	1.07019484311447	4.68923118388441	3.99134663588557	1.17484939587163	0.2400549740396	NA	0	0	6.42116905868684	0	0	0	Adrb2	adrenergic receptor, beta 2 [Source:MGI Symbol;Acc:MGI:87938]
ENSMUSG00000048806	1.07019484311447	4.68923118388441	3.99134663588557	1.17484939587163	0.2400549740396	NA	0	0	6.42116905868684	0	0	0	Ifnb1	interferon beta 1, fibroblast [Source:MGI Symbol;Acc:MGI:107657]
ENSMUSG00000051323	1.07019484311447	4.68923118388441	3.99134663588557	1.17484939587163	0.2400549740396	NA	0	0	6.42116905868684	0	0	0	Pcdh19	protocadherin 19 [Source:MGI Symbol;Acc:MGI:2685563]
ENSMUSG00000051351	1.07019484311447	4.68923118388441	3.99134663588557	1.17484939587163	0.2400549740396	NA	0	0	6.42116905868684	0	0	0	Zfp46	zinc finger protein 46 [Source:MGI Symbol;Acc:MGI:99192]
ENSMUSG00000056220	1.07019484311447	4.68923118388441	3.99134663588557	1.17484939587163	0.2400549740396	NA	0	0	6.42116905868684	0	0	0	Pla2g4a	phospholipase A2, group IVA (cytosolic, calcium-dependent) [Source:MGI Symbol;Acc:MGI:1195256]
ENSMUSG00000057933	1.07019484311447	4.68923118388441	3.99134663588557	1.17484939587163	0.2400549740396	NA	0	0	6.42116905868684	0	0	0	Gsta2	glutathione S-transferase, alpha 2 (Yc2) [Source:MGI Symbol;Acc:MGI:95863]
ENSMUSG00000062564	1.07019484311447	4.68923118388441	3.99134663588557	1.17484939587163	0.2400549740396	NA	0	0	6.42116905868684	0	0	0	Tex28	testis expressed 28 [Source:MGI Symbol;Acc:MGI:2686384]
ENSMUSG00000066224	1.07019484311447	4.68923118388441	3.99134663588557	1.17484939587163	0.2400549740396	NA	0	0	6.42116905868684	0	0	0	Arid3c	AT-rich interaction domain 3C [Source:MGI Symbol;Acc:MGI:3650624]
ENSMUSG00000069892	1.07019484311447	4.68923118388441	3.99134663588557	1.17484939587163	0.2400549740396	NA	0	0	6.42116905868684	0	0	0	9930111J21Rik2	RIKEN cDNA 9930111J21 gene 2 [Source:MGI Symbol;Acc:MGI:3711310]
ENSMUSG00000072494	1.07019484311447	4.68923118388441	3.99134663588557	1.17484939587163	0.2400549740396	NA	0	0	6.42116905868684	0	0	0	Ppp1r3e	protein phosphatase 1, regulatory subunit 3E [Source:MGI Symbol;Acc:MGI:2145790]
ENSMUSG00000072875	1.07019484311447	4.68923118388441	3.99134663588557	1.17484939587163	0.2400549740396	NA	0	0	6.42116905868684	0	0	0	Gpr27	G protein-coupled receptor 27 [Source:MGI Symbol;Acc:MGI:1202299]
ENSMUSG00000075394	1.07019484311447	4.68923118388441	3.99134663588557	1.17484939587163	0.2400549740396	NA	0	0	6.42116905868684	0	0	0	Hoxc4	homeobox C4 [Source:MGI Symbol;Acc:MGI:96195]
ENSMUSG00000082229	1.07019484311447	4.68923118388441	3.99134663588557	1.17484939587163	0.2400549740396	NA	0	0	6.42116905868684	0	0	0	Nap1l2	nucleosome assembly protein 1-like 2 [Source:MGI Symbol;Acc:MGI:106654]
ENSMUSG00000087075	1.07019484311447	4.68923118388441	3.99134663588557	1.17484939587163	0.2400549740396	NA	0	0	6.42116905868684	0	0	0	Lbhd2	LBH domain containing 2 [Source:MGI Symbol;Acc:MGI:2685744]
ENSMUSG00000094918	1.07019484311447	4.68923118388441	3.99134663588557	1.17484939587163	0.2400549740396	NA	0	0	6.42116905868684	0	0	0	Gm8765	predicted gene 8765 [Source:MGI Symbol;Acc:MGI:3704126]
ENSMUSG00000102752	1.07019484311447	4.68923118388441	3.99134663588557	1.17484939587163	0.2400549740396	NA	0	0	6.42116905868684	0	0	0	Gm7694	predicted gene 7694 [Source:MGI Symbol;Acc:MGI:3649135]
ENSMUSG00000028789	1863.28158617217	4.68313744281145	0.107669226612008	43.4955984191042	0	0	3385.0726574967	3571.51408391278	3805.61286211507	167.127947788815	142.78929872625	107.572666993388	Azin2	antizyme inhibitor 2 [Source:MGI Symbol;Acc:MGI:2442093]
ENSMUSG00000030701	2.13938422460141	4.67624886948582	2.72578927462011	1.71555773332388	0.0862430200676545	0.169635369378684	0	5.93274764769565	6.42116905868684	0	0	0.482388641225955	Plekhb1	pleckstrin homology domain containing, family B (evectins) member 1 [Source:MGI Symbol;Acc:MGI:1351469]
ENSMUSG00000050967	1.05394529045056	4.66886412815888	3.88825346943597	1.2007612581996	0.229843824017891	NA	2.04289237024544	0	4.28077937245789	0	0	0	Creg2	cellular repressor of E1A-stimulated genes 2 [Source:MGI Symbol;Acc:MGI:1928333]
ENSMUSG00000031444	2.11773	4.66620585152516	3.01212857384437	1.54913900158309	0.121348309054694	0.222269354891492	12.2573542214727	0	0	0	0.449022951969339	0	F10	coagulation factor X [Source:MGI Symbol;Acc:MGI:103107]
ENSMUSG00000029102	4.11596131220575	4.6575016142908	2.33372710119547	1.99573532479653	0.0459627398757657	0.101606575868272	0	23.7309905907826	0	0	0	0.964777282451911	Hgfac	hepatocyte growth factor activator [Source:MGI Symbol;Acc:MGI:1859281]
ENSMUSG00000029766	283.293931690934	4.65636628537284	0.20688690134048	22.5068201766419	3.55899779205657e-112	1.63333046272353e-110	545.452262855534	569.543774178782	520.114693753634	27.6452244462702	14.8177574149882	22.189877496394	1700012A03Rik	RIKEN cDNA 1700012A03 gene [Source:MGI Symbol;Acc:MGI:1923632]
ENSMUSG00000064360	2.10132417106414	4.65623624572301	2.55028996511026	1.82576738701229	0.0678853077584858	0.140107794987104	4.08578474049089	5.93274764769565	2.14038968622895	0	0.449022951969339	0	mt-Nd3	mitochondrially encoded NADH dehydrogenase 3 [Source:MGI Symbol;Acc:MGI:102499]
ENSMUSG00000022206	1.04306032028163	4.65521023369842	3.90284072798483	1.19277484226267	0.232957565349341	NA	0	1.97758254923188	4.28077937245789	0	0	0	Npr3	natriuretic peptide receptor 3 [Source:MGI Symbol;Acc:MGI:97373]
ENSMUSG00000025013	1.04306032028163	4.65521023369842	3.90284072798483	1.19277484226267	0.232957565349341	NA	0	1.97758254923188	4.28077937245789	0	0	0	Tll2	tolloid-like 2 [Source:MGI Symbol;Acc:MGI:1346044]
ENSMUSG00000027577	1.04306032028163	4.65521023369842	3.90284072798483	1.19277484226267	0.232957565349341	NA	0	1.97758254923188	4.28077937245789	0	0	0	Chrna4	cholinergic receptor, nicotinic, alpha polypeptide 4 [Source:MGI Symbol;Acc:MGI:87888]
ENSMUSG00000031557	1.04306032028163	4.65521023369842	3.90284072798483	1.19277484226267	0.232957565349341	NA	0	1.97758254923188	4.28077937245789	0	0	0	Plekha2	pleckstrin homology domain-containing, family A (phosphoinositide binding specific) member 2 [Source:MGI Symbol;Acc:MGI:1928144]
ENSMUSG00000044768	1.04306032028163	4.65521023369842	3.90284072798483	1.19277484226267	0.232957565349341	NA	0	1.97758254923188	4.28077937245789	0	0	0	Macir	macrophage immunometabolism regulator [Source:MGI Symbol;Acc:MGI:1277184]
ENSMUSG00000070531	1.04306032028163	4.65521023369842	3.90284072798483	1.19277484226267	0.232957565349341	NA	0	1.97758254923188	4.28077937245789	0	0	0	Wfdc6b	WAP four-disulfide core domain 6B [Source:MGI Symbol;Acc:MGI:3575430]
ENSMUSG00000044250	2.09093360275171	4.6525184435333	2.75540414666715	1.68850672927993	0.0913139983046513	0.177254908212104	8.17156948098178	3.95516509846377	0	0.418867037064699	0	0	Pced1b	PC-esterase domain containing 1B [Source:MGI Symbol;Acc:MGI:2446270]
ENSMUSG00000040451	427.615347933171	4.65222997000437	0.165656467908162	28.0835999267081	1.55377523767557e-173	1.13672368417477e-171	845.757441281614	844.427748522014	776.961456101108	29.320692594529	29.1864918780071	40.0382572217543	Sgms1	sphingomyelin synthase 1 [Source:MGI Symbol;Acc:MGI:2444110]
ENSMUSG00000025557	1.03769573778664	4.6485875650238	3.91016747319694	1.18884615477176	0.234500211918524	NA	4.08578474049089	0	2.14038968622895	0	0	0	Slc15a1	solute carrier family 15 (oligopeptide transporter), member 1 [Source:MGI Symbol;Acc:MGI:1861376]
ENSMUSG00000025876	1.02681076761771	4.63472795303621	3.59699493117145	1.2884999956135	0.197571970376596	NA	2.04289237024544	1.97758254923188	2.14038968622895	0	0	0	Unc5a	unc-5 netrin receptor A [Source:MGI Symbol;Acc:MGI:894682]
ENSMUSG00000027784	33.1378760213527	4.62869811851294	0.694857566341573	6.66136247588559	2.71300594165242e-11	1.93917556875466e-10	61.2867711073633	35.5964858861739	94.1771461940737	0	5.83729837560141	1.92955456490382	Ppm1l	protein phosphatase 1 (formerly 2C)-like [Source:MGI Symbol;Acc:MGI:2139740]
ENSMUSG00000001583	1.02144618512272	4.62800438978478	3.99497268371632	1.15845707998173	0.246677557091013	NA	6.12867711073633	0	0	0	0	0	Tnk1	tyrosine kinase, non-receptor, 1 [Source:MGI Symbol;Acc:MGI:1930958]
ENSMUSG00000006362	1.02144618512272	4.62800438978478	3.99497268371632	1.15845707998173	0.246677557091013	NA	6.12867711073633	0	0	0	0	0	Cbfa2t3	CBFA2/RUNX1 translocation partner 3 [Source:MGI Symbol;Acc:MGI:1338013]
ENSMUSG00000015568	1.02144618512272	4.62800438978478	3.99497268371632	1.15845707998173	0.246677557091013	NA	6.12867711073633	0	0	0	0	0	Lpl	lipoprotein lipase [Source:MGI Symbol;Acc:MGI:96820]
ENSMUSG00000017311	1.02144618512272	4.62800438978478	3.99497268371632	1.15845707998173	0.246677557091013	NA	6.12867711073633	0	0	0	0	0	Pyy	peptide YY [Source:MGI Symbol;Acc:MGI:99924]
ENSMUSG00000022244	1.02144618512272	4.62800438978478	3.99497268371632	1.15845707998173	0.246677557091013	NA	6.12867711073633	0	0	0	0	0	Amacr	alpha-methylacyl-CoA racemase [Source:MGI Symbol;Acc:MGI:1098273]
ENSMUSG00000022856	1.02144618512272	4.62800438978478	3.99497268371632	1.15845707998173	0.246677557091013	NA	6.12867711073633	0	0	0	0	0	Tmem41a	transmembrane protein 41a [Source:MGI Symbol;Acc:MGI:1913914]
ENSMUSG00000024409	1.02144618512272	4.62800438978478	3.99497268371632	1.15845707998173	0.246677557091013	NA	6.12867711073633	0	0	0	0	0	Psors1c2	psoriasis susceptibility 1 candidate 2 (human) [Source:MGI Symbol;Acc:MGI:1930025]
ENSMUSG00000024440	1.02144618512272	4.62800438978478	3.99497268371632	1.15845707998173	0.246677557091013	NA	6.12867711073633	0	0	0	0	0	Pcdh12	protocadherin 12 [Source:MGI Symbol;Acc:MGI:1855700]
ENSMUSG00000024907	1.02144618512272	4.62800438978478	3.99497268371632	1.15845707998173	0.246677557091013	NA	6.12867711073633	0	0	0	0	0	Gal	galanin and GMAP prepropeptide [Source:MGI Symbol;Acc:MGI:95637]
ENSMUSG00000025427	1.02144618512272	4.62800438978478	3.99497268371632	1.15845707998173	0.246677557091013	NA	6.12867711073633	0	0	0	0	0	Ark2c	arkadia (RNF111) C-terminal like ring finger ubiquitin ligase 2C [Source:MGI Symbol;Acc:MGI:2444521]
ENSMUSG00000026841	1.02144618512272	4.62800438978478	3.99497268371632	1.15845707998173	0.246677557091013	NA	6.12867711073633	0	0	0	0	0	Fibcd1	fibrinogen C domain containing 1 [Source:MGI Symbol;Acc:MGI:2138953]
ENSMUSG00000028631	1.02144618512272	4.62800438978478	3.99497268371632	1.15845707998173	0.246677557091013	NA	6.12867711073633	0	0	0	0	0	Kcnq4	potassium voltage-gated channel, subfamily Q, member 4 [Source:MGI Symbol;Acc:MGI:1926803]
ENSMUSG00000028776	1.02144618512272	4.62800438978478	3.99497268371632	1.15845707998173	0.246677557091013	NA	6.12867711073633	0	0	0	0	0	Tinagl1	tubulointerstitial nephritis antigen-like 1 [Source:MGI Symbol;Acc:MGI:2137617]
ENSMUSG00000028832	1.02144618512272	4.62800438978478	3.99497268371632	1.15845707998173	0.246677557091013	NA	6.12867711073633	0	0	0	0	0	Stmn1	stathmin 1 [Source:MGI Symbol;Acc:MGI:96739]
ENSMUSG00000029195	1.02144618512272	4.62800438978478	3.99497268371632	1.15845707998173	0.246677557091013	NA	6.12867711073633	0	0	0	0	0	Klb	klotho beta [Source:MGI Symbol;Acc:MGI:1932466]
ENSMUSG00000030730	1.02144618512272	4.62800438978478	3.99497268371632	1.15845707998173	0.246677557091013	NA	6.12867711073633	0	0	0	0	0	Atp2a1	ATPase, Ca++ transporting, cardiac muscle, fast twitch 1 [Source:MGI Symbol;Acc:MGI:105058]
ENSMUSG00000030781	1.02144618512272	4.62800438978478	3.99497268371632	1.15845707998173	0.246677557091013	NA	6.12867711073633	0	0	0	0	0	Slc5a2	solute carrier family 5 (sodium/glucose cotransporter), member 2 [Source:MGI Symbol;Acc:MGI:2181411]
ENSMUSG00000031209	1.02144618512272	4.62800438978478	3.99497268371632	1.15845707998173	0.246677557091013	NA	6.12867711073633	0	0	0	0	0	Heph	hephaestin [Source:MGI Symbol;Acc:MGI:1332240]
ENSMUSG00000031492	1.02144618512272	4.62800438978478	3.99497268371632	1.15845707998173	0.246677557091013	NA	6.12867711073633	0	0	0	0	0	Chrnb3	cholinergic receptor, nicotinic, beta polypeptide 3 [Source:MGI Symbol;Acc:MGI:106212]
ENSMUSG00000032415	1.02144618512272	4.62800438978478	3.99497268371632	1.15845707998173	0.246677557091013	NA	6.12867711073633	0	0	0	0	0	Ube3d	ubiquitin protein ligase E3D [Source:MGI Symbol;Acc:MGI:1917598]
ENSMUSG00000033981	1.02144618512272	4.62800438978478	3.99497268371632	1.15845707998173	0.246677557091013	NA	6.12867711073633	0	0	0	0	0	Gria2	glutamate receptor, ionotropic, AMPA2 (alpha 2) [Source:MGI Symbol;Acc:MGI:95809]
ENSMUSG00000034127	1.02144618512272	4.62800438978478	3.99497268371632	1.15845707998173	0.246677557091013	NA	6.12867711073633	0	0	0	0	0	Tspan8	tetraspanin 8 [Source:MGI Symbol;Acc:MGI:2384918]
ENSMUSG00000035104	1.02144618512272	4.62800438978478	3.99497268371632	1.15845707998173	0.246677557091013	NA	6.12867711073633	0	0	0	0	0	Eva1a	eva-1 homolog A, regulator of programmed cell death [Source:MGI Symbol;Acc:MGI:2385247]
ENSMUSG00000038888	1.02144618512272	4.62800438978478	3.99497268371632	1.15845707998173	0.246677557091013	NA	6.12867711073633	0	0	0	0	0	Ctu1	cytosolic thiouridylase subunit 1 [Source:MGI Symbol;Acc:MGI:2385277]
ENSMUSG00000042401	1.02144618512272	4.62800438978478	3.99497268371632	1.15845707998173	0.246677557091013	NA	6.12867711073633	0	0	0	0	0	Crtac1	cartilage acidic protein 1 [Source:MGI Symbol;Acc:MGI:1920082]
ENSMUSG00000043110	1.02144618512272	4.62800438978478	3.99497268371632	1.15845707998173	0.246677557091013	NA	6.12867711073633	0	0	0	0	0	Lrrn4	leucine rich repeat neuronal 4 [Source:MGI Symbol;Acc:MGI:2445154]
ENSMUSG00000044217	1.02144618512272	4.62800438978478	3.99497268371632	1.15845707998173	0.246677557091013	NA	6.12867711073633	0	0	0	0	0	Aqp5	aquaporin 5 [Source:MGI Symbol;Acc:MGI:106215]
ENSMUSG00000044313	1.02144618512272	4.62800438978478	3.99497268371632	1.15845707998173	0.246677557091013	NA	6.12867711073633	0	0	0	0	0	Mab21l3	mab-21-like 3 [Source:MGI Symbol;Acc:MGI:2446273]
ENSMUSG00000045691	1.02144618512272	4.62800438978478	3.99497268371632	1.15845707998173	0.246677557091013	NA	6.12867711073633	0	0	0	0	0	Thtpa	thiamine triphosphatase [Source:MGI Symbol;Acc:MGI:2446078]
ENSMUSG00000046470	1.02144618512272	4.62800438978478	3.99497268371632	1.15845707998173	0.246677557091013	NA	6.12867711073633	0	0	0	0	0	Sox18	SRY (sex determining region Y)-box 18 [Source:MGI Symbol;Acc:MGI:103559]
ENSMUSG00000047712	1.02144618512272	4.62800438978478	3.99497268371632	1.15845707998173	0.246677557091013	NA	6.12867711073633	0	0	0	0	0	Ust	uronyl-2-sulfotransferase [Source:MGI Symbol;Acc:MGI:2442406]
ENSMUSG00000052942	1.02144618512272	4.62800438978478	3.99497268371632	1.15845707998173	0.246677557091013	NA	6.12867711073633	0	0	0	0	0	Glis3	GLIS family zinc finger 3 [Source:MGI Symbol;Acc:MGI:2444289]
ENSMUSG00000052957	1.02144618512272	4.62800438978478	3.99497268371632	1.15845707998173	0.246677557091013	NA	6.12867711073633	0	0	0	0	0	Gas1	growth arrest specific 1 [Source:MGI Symbol;Acc:MGI:95655]
ENSMUSG00000055945	1.02144618512272	4.62800438978478	3.99497268371632	1.15845707998173	0.246677557091013	NA	6.12867711073633	0	0	0	0	0	Prr18	proline rich 18 [Source:MGI Symbol;Acc:MGI:2443403]
ENSMUSG00000057836	1.02144618512272	4.62800438978478	3.99497268371632	1.15845707998173	0.246677557091013	NA	6.12867711073633	0	0	0	0	0	Xlr3a	X-linked lymphocyte-regulated 3A [Source:MGI Symbol;Acc:MGI:109506]
ENSMUSG00000061143	1.02144618512272	4.62800438978478	3.99497268371632	1.15845707998173	0.246677557091013	NA	6.12867711073633	0	0	0	0	0	Maml3	mastermind like transcriptional coactivator 3 [Source:MGI Symbol;Acc:MGI:2389461]
ENSMUSG00000069036	1.02144618512272	4.62800438978478	3.99497268371632	1.15845707998173	0.246677557091013	NA	6.12867711073633	0	0	0	0	0	Sry	sex determining region of Chr Y [Source:MGI Symbol;Acc:MGI:98660]
ENSMUSG00000071262	1.02144618512272	4.62800438978478	3.99497268371632	1.15845707998173	0.246677557091013	NA	6.12867711073633	0	0	0	0	0	Zfp957	zinc finger protein 957 [Source:MGI Symbol;Acc:MGI:2145729]
ENSMUSG00000074194	1.02144618512272	4.62800438978478	3.99497268371632	1.15845707998173	0.246677557091013	NA	6.12867711073633	0	0	0	0	0	Zfp791	zinc finger protein 791 [Source:MGI Symbol;Acc:MGI:3648473]
ENSMUSG00000078861	1.02144618512272	4.62800438978478	3.99497268371632	1.15845707998173	0.246677557091013	NA	6.12867711073633	0	0	0	0	0	Zfp931	zinc finger protein 931 [Source:MGI Symbol;Acc:MGI:2441662]
ENSMUSG00000090946	1.02144618512272	4.62800438978478	3.99497268371632	1.15845707998173	0.246677557091013	NA	6.12867711073633	0	0	0	0	0	Ccdc71l	coiled-coil domain containing 71 like [Source:MGI Symbol;Acc:MGI:1919373]
ENSMUSG00000103749	1.02144618512272	4.62800438978478	3.99497268371632	1.15845707998173	0.246677557091013	NA	6.12867711073633	0	0	0	0	0	Pcdhgb5	protocadherin gamma subfamily B, 5 [Source:MGI Symbol;Acc:MGI:1935196]
ENSMUSG00000027737	12.0037306677231	4.62399784613989	1.13526398895175	4.07305956248069	4.63995521094763e-05	0.000193194251618867	18.386031332209	33.618903336942	17.1231174898316	0	0	2.89433184735573	Slc7a11	solute carrier family 7 (cationic amino acid transporter, y+ system), member 11 [Source:MGI Symbol;Acc:MGI:1347355]
ENSMUSG00000010358	2.04739	4.62332056923679	3.04924551568531	1.51621787929323	0.129464268549126	0.23389702323438	0	11.8654952953913	0	0.418867037064699	0	0	Ifi35	interferon-induced protein 35 [Source:MGI Symbol;Acc:MGI:1917360]
ENSMUSG00000000682	1.01592579744879	4.6207700886499	3.94037384968239	1.17267301655206	0.240926956186303	NA	0	3.95516509846377	2.14038968622895	0	0	0	Cd52	CD52 antigen [Source:MGI Symbol;Acc:MGI:1346088]
ENSMUSG00000020734	1.01592579744879	4.6207700886499	3.94037384968239	1.17267301655206	0.240926956186303	NA	0	3.95516509846377	2.14038968622895	0	0	0	Grin2c	glutamate receptor, ionotropic, NMDA2C (epsilon 3) [Source:MGI Symbol;Acc:MGI:95822]
ENSMUSG00000043463	1.0105612149538	4.61399097130036	3.94794173290562	1.16870797074924	0.242521309456705	NA	4.08578474049089	1.97758254923188	0	0	0	0	Rab9b	RAB9B, member RAS oncogene family [Source:MGI Symbol;Acc:MGI:2442454]
ENSMUSG00000017832	2820.34449555346	4.60651233660752	0.0787240093867056	58.5147069171688	0	0	5432.05081248264	5187.19902663523	5635.64604384082	205.663715198767	255.045036718585	206.462338444709	Hspb9	heat shock protein, alpha-crystallin-related, B9 [Source:MGI Symbol;Acc:MGI:1922732]
ENSMUSG00000050860	514.652113906517	4.60504963449152	0.149471584041574	30.8088635309483	1.9937529288612e-208	1.783906847212e-206	966.288091126095	925.508633040521	1074.47562248693	44.3999059288581	38.1669509173938	39.0734799393024	Phospho1	phosphatase, orphan 1 [Source:MGI Symbol;Acc:MGI:2447348]
ENSMUSG00000053441	0.999676244784868	4.59981827181606	3.96344491207433	1.16056066726273	0.245820608703432	NA	2.04289237024544	3.95516509846377	0	0	0	0	Adamts19	ADAM metallopeptidase with thrombospondin type 1 motif 19 [Source:MGI Symbol;Acc:MGI:2442875]
ENSMUSG00000072571	0.999676244784868	4.59981827181606	3.96344491207433	1.16056066726273	0.245820608703432	NA	2.04289237024544	3.95516509846377	0	0	0	0	Tmem253	transmembrane protein 253 [Source:MGI Symbol;Acc:MGI:3588246]
ENSMUSG00000032554	13.1262819504114	4.58844451166685	1.07556814994705	4.26606581079287	1.98950115729512e-05	8.70022007499275e-05	20.4289237024544	31.6413207877101	23.5442865485184	0	3.14316066378538	0	Trf	transferrin [Source:MGI Symbol;Acc:MGI:98821]
ENSMUSG00000041798	16.1156926507268	4.58747454439603	1.02943190510362	4.45631665548026	8.3379846287997e-06	3.81950330859602e-05	20.4289237024544	55.3723113784927	17.1231174898316	3.76980333358229	0	0	Gck	glucokinase [Source:MGI Symbol;Acc:MGI:1270854]
ENSMUSG00000004665	0.988791274615941	4.58545938584973	3.99758244945875	1.14705811420364	0.251357603465518	NA	0	5.93274764769565	0	0	0	0	Cnn2	calponin 2 [Source:MGI Symbol;Acc:MGI:105093]
ENSMUSG00000010760	0.988791274615941	4.58545938584973	3.99758244945875	1.14705811420364	0.251357603465518	NA	0	5.93274764769565	0	0	0	0	Phlda2	pleckstrin homology like domain, family A, member 2 [Source:MGI Symbol;Acc:MGI:1202307]
ENSMUSG00000012405	0.988791274615941	4.58545938584973	3.99758244945875	1.14705811420364	0.251357603465518	NA	0	5.93274764769565	0	0	0	0	Rpl15	ribosomal protein L15 [Source:MGI Symbol;Acc:MGI:1913730]
ENSMUSG00000018569	0.988791274615941	4.58545938584973	3.99758244945875	1.14705811420364	0.251357603465518	NA	0	5.93274764769565	0	0	0	0	Cldn7	claudin 7 [Source:MGI Symbol;Acc:MGI:1859285]
ENSMUSG00000020137	0.988791274615941	4.58545938584973	3.99758244945875	1.14705811420364	0.251357603465518	NA	0	5.93274764769565	0	0	0	0	Thap2	THAP domain containing, apoptosis associated protein 2 [Source:MGI Symbol;Acc:MGI:1914066]
ENSMUSG00000021055	0.988791274615941	4.58545938584973	3.99758244945875	1.14705811420364	0.251357603465518	NA	0	5.93274764769565	0	0	0	0	Esr2	estrogen receptor 2 (beta) [Source:MGI Symbol;Acc:MGI:109392]
ENSMUSG00000024747	0.988791274615941	4.58545938584973	3.99758244945875	1.14705811420364	0.251357603465518	NA	0	5.93274764769565	0	0	0	0	Aldh1a7	aldehyde dehydrogenase family 1, subfamily A7 [Source:MGI Symbol;Acc:MGI:1347050]
ENSMUSG00000028479	0.988791274615941	4.58545938584973	3.99758244945875	1.14705811420364	0.251357603465518	NA	0	5.93274764769565	0	0	0	0	Gne	glucosamine (UDP-N-acetyl)-2-epimerase/N-acetylmannosamine kinase [Source:MGI Symbol;Acc:MGI:1354951]
ENSMUSG00000028518	0.988791274615941	4.58545938584973	3.99758244945875	1.14705811420364	0.251357603465518	NA	0	5.93274764769565	0	0	0	0	Prkaa2	protein kinase, AMP-activated, alpha 2 catalytic subunit [Source:MGI Symbol;Acc:MGI:1336173]
ENSMUSG00000028707	0.988791274615941	4.58545938584973	3.99758244945875	1.14705811420364	0.251357603465518	NA	0	5.93274764769565	0	0	0	0	Dmbx1	diencephalon/mesencephalon homeobox 1 [Source:MGI Symbol;Acc:MGI:2153518]
ENSMUSG00000031886	0.988791274615941	4.58545938584973	3.99758244945875	1.14705811420364	0.251357603465518	NA	0	5.93274764769565	0	0	0	0	Ces2e	carboxylesterase 2E [Source:MGI Symbol;Acc:MGI:2443170]
ENSMUSG00000031952	0.988791274615941	4.58545938584973	3.99758244945875	1.14705811420364	0.251357603465518	NA	0	5.93274764769565	0	0	0	0	Chst5	carbohydrate sulfotransferase 5 [Source:MGI Symbol;Acc:MGI:1931825]
ENSMUSG00000032257	0.988791274615941	4.58545938584973	3.99758244945875	1.14705811420364	0.251357603465518	NA	0	5.93274764769565	0	0	0	0	Ankk1	ankyrin repeat and kinase domain containing 1 [Source:MGI Symbol;Acc:MGI:3045301]
ENSMUSG00000032691	0.988791274615941	4.58545938584973	3.99758244945875	1.14705811420364	0.251357603465518	NA	0	5.93274764769565	0	0	0	0	Nlrp3	NLR family, pyrin domain containing 3 [Source:MGI Symbol;Acc:MGI:2653833]
ENSMUSG00000035283	0.988791274615941	4.58545938584973	3.99758244945875	1.14705811420364	0.251357603465518	NA	0	5.93274764769565	0	0	0	0	Adrb1	adrenergic receptor, beta 1 [Source:MGI Symbol;Acc:MGI:87937]
ENSMUSG00000042861	0.988791274615941	4.58545938584973	3.99758244945875	1.14705811420364	0.251357603465518	NA	0	5.93274764769565	0	0	0	0	Kcna10	potassium voltage-gated channel, shaker-related subfamily, member 10 [Source:MGI Symbol;Acc:MGI:3037820]
ENSMUSG00000043298	0.988791274615941	4.58545938584973	3.99758244945875	1.14705811420364	0.251357603465518	NA	0	5.93274764769565	0	0	0	0	Smco3	single-pass membrane protein with coiled-coil domains 3 [Source:MGI Symbol;Acc:MGI:2443451]
ENSMUSG00000043705	0.988791274615941	4.58545938584973	3.99758244945875	1.14705811420364	0.251357603465518	NA	0	5.93274764769565	0	0	0	0	Capn13	calpain 13 [Source:MGI Symbol;Acc:MGI:2685789]
ENSMUSG00000043880	0.988791274615941	4.58545938584973	3.99758244945875	1.14705811420364	0.251357603465518	NA	0	5.93274764769565	0	0	0	0	Or11l3	olfactory receptor family 11 subfamily L member 3 [Source:MGI Symbol;Acc:MGI:3030157]
ENSMUSG00000044309	0.988791274615941	4.58545938584973	3.99758244945875	1.14705811420364	0.251357603465518	NA	0	5.93274764769565	0	0	0	0	Apol7c	apolipoprotein L 7c [Source:MGI Symbol;Acc:MGI:1920912]
ENSMUSG00000044597	0.988791274615941	4.58545938584973	3.99758244945875	1.14705811420364	0.251357603465518	NA	0	5.93274764769565	0	0	0	0	Mycs	myc-like oncogene, s-myc protein [Source:MGI Symbol;Acc:MGI:1332242]
ENSMUSG00000045404	0.988791274615941	4.58545938584973	3.99758244945875	1.14705811420364	0.251357603465518	NA	0	5.93274764769565	0	0	0	0	Kcnk13	potassium channel, subfamily K, member 13 [Source:MGI Symbol;Acc:MGI:2384976]
ENSMUSG00000045733	0.988791274615941	4.58545938584973	3.99758244945875	1.14705811420364	0.251357603465518	NA	0	5.93274764769565	0	0	0	0	Sprn	shadow of prion protein [Source:MGI Symbol;Acc:MGI:3582583]
ENSMUSG00000046182	0.988791274615941	4.58545938584973	3.99758244945875	1.14705811420364	0.251357603465518	NA	0	5.93274764769565	0	0	0	0	Gsg1l	GSG1-like [Source:MGI Symbol;Acc:MGI:2685483]
ENSMUSG00000051550	0.988791274615941	4.58545938584973	3.99758244945875	1.14705811420364	0.251357603465518	NA	0	5.93274764769565	0	0	0	0	Zfp579	zinc finger protein 579 [Source:MGI Symbol;Acc:MGI:1915740]
ENSMUSG00000051950	0.988791274615941	4.58545938584973	3.99758244945875	1.14705811420364	0.251357603465518	NA	0	5.93274764769565	0	0	0	0	B3glct	beta-3-glucosyltransferase [Source:MGI Symbol;Acc:MGI:2685903]
ENSMUSG00000053388	0.988791274615941	4.58545938584973	3.99758244945875	1.14705811420364	0.251357603465518	NA	0	5.93274764769565	0	0	0	0	Trim50	tripartite motif-containing 50 [Source:MGI Symbol;Acc:MGI:2664992]
ENSMUSG00000055026	0.988791274615941	4.58545938584973	3.99758244945875	1.14705811420364	0.251357603465518	NA	0	5.93274764769565	0	0	0	0	Gabrg3	gamma-aminobutyric acid type A receptor, subunit gamma 3 [Source:MGI Symbol;Acc:MGI:95624]
ENSMUSG00000071451	0.988791274615941	4.58545938584973	3.99758244945875	1.14705811420364	0.251357603465518	NA	0	5.93274764769565	0	0	0	0	Psmg4	proteasome (prosome, macropain) assembly chaperone 4 [Source:MGI Symbol;Acc:MGI:1916916]
ENSMUSG00000071847	0.988791274615941	4.58545938584973	3.99758244945875	1.14705811420364	0.251357603465518	NA	0	5.93274764769565	0	0	0	0	Apcdd1	adenomatosis polyposis coli down-regulated 1 [Source:MGI Symbol;Acc:MGI:3513977]
ENSMUSG00000074939	0.988791274615941	4.58545938584973	3.99758244945875	1.14705811420364	0.251357603465518	NA	0	5.93274764769565	0	0	0	0	Chrm5	cholinergic receptor, muscarinic 5 [Source:MGI Symbol;Acc:MGI:109248]
ENSMUSG00000079197	0.988791274615941	4.58545938584973	3.99758244945875	1.14705811420364	0.251357603465518	NA	0	5.93274764769565	0	0	0	0	Psme2	proteasome (prosome, macropain) activator subunit 2 (PA28 beta) [Source:MGI Symbol;Acc:MGI:1096365]
ENSMUSG00000096497	0.988791274615941	4.58545938584973	3.99758244945875	1.14705811420364	0.251357603465518	NA	0	5.93274764769565	0	0	0	0	Or6c5c	olfactory receptor family 6 subfamily C member 5C [Source:MGI Symbol;Acc:MGI:3030621]
ENSMUSG00000098132	0.988791274615941	4.58545938584973	3.99758244945875	1.14705811420364	0.251357603465518	NA	0	5.93274764769565	0	0	0	0	Rassf10	Ras association (RalGDS/AF-6) domain family (N-terminal) member 10 [Source:MGI Symbol;Acc:MGI:1925998]
ENSMUSG00000098950	0.988791274615941	4.58545938584973	3.99758244945875	1.14705811420364	0.251357603465518	NA	0	5.93274764769565	0	0	0	0	Gm28036	predicted gene, 28036 [Source:MGI Symbol;Acc:MGI:5547772]
ENSMUSG00000038403	13.6128469759659	4.57510506855175	1.17350335552071	3.89867233615339	9.67215512706071e-05	0.000383953377961232	26.5576008131908	47.4619811815652	4.28077937245789	0	0	3.37672048858169	Hjv	hemojuvelin BMP co-receptor [Source:MGI Symbol;Acc:MGI:1916835]
ENSMUSG00000030200	1328.86120358369	4.56918945146737	0.110456262668131	41.3665041808959	0	0	2808.97700908749	2422.53862280906	2418.64034543871	101.365822969657	94.2948199135613	127.350601283652	Bcl2l14	BCL2 like 14 [Source:MGI Symbol;Acc:MGI:1914063]
ENSMUSG00000074063	482.45984060881	4.56491990738427	0.532726131491392	8.56898064039877	1.04405084091453e-17	1.05140569299223e-16	941.77338268315	917.598302843594	918.227175392218	66.5998588932872	33.6767213977005	16.8836024429084	Osgin1	oxidative stress induced growth inhibitor 1 [Source:MGI Symbol;Acc:MGI:1919089]
ENSMUSG00000100241	20.7840478819644	4.56370711020169	1.87373363039852	2.43562213761999	0.014866204859659	0.0386477821571027	53.1152016263815	49.4395637307971	17.1231174898316	5.02640444477639	0	0	Slc18a3	solute carrier family 18 (vesicular monoamine), member 3 [Source:MGI Symbol;Acc:MGI:1101061]
ENSMUSG00000068267	18.9966470025111	4.55690540652628	1.79138327842709	2.54379141605444	0.0109656544160592	0.0295770644052329	20.4289237024544	37.5740684354058	51.3693524694947	4.60753740771169	0	0	Cenpb	centromere protein B [Source:MGI Symbol;Acc:MGI:88376]
ENSMUSG00000022756	59.6817455023535	4.53830315107485	1.16428049739841	3.89794655258393	9.70118201990122e-05	0.000384982772117139	112.359080363499	132.498030798536	98.4579255665316	7.53960666716459	0	7.23582961838933	Slc7a4	solute carrier family 7 (cationic amino acid transporter, y+ system), member 4 [Source:MGI Symbol;Acc:MGI:2146512]
ENSMUSG00000042888	722.268002934446	4.53667443503968	0.126409073569687	35.8888354049893	4.56195090320485e-282	5.67369833831587e-280	1391.20970413715	1328.93547308382	1434.06108977339	55.2904488925403	56.5768919481368	67.5344097716338	Prr30	proline rich 30 [Source:MGI Symbol;Acc:MGI:1923877]
ENSMUSG00000015599	1256.5270004736	4.52200897612149	0.352563095670826	12.826098453434	1.17114898001668e-37	2.08675929290365e-36	2435.12770533257	2292.01817455975	2497.83476382918	159.169474084586	82.1712002103891	72.8406848251193	Ttbk1	tau tubulin kinase 1 [Source:MGI Symbol;Acc:MGI:2147036]
ENSMUSG00000028132	213.386177087943	4.51446136459068	0.266455598447247	16.9426403156789	2.18111623585248e-64	6.0685777685229e-63	412.66425878958	462.75431652026	351.023908541547	9.63394185248809	27.839423022099	16.4012138016825	Tlcd4	TLC domain containing 4 [Source:MGI Symbol;Acc:MGI:1923195]
ENSMUSG00000040596	21.7897630487093	4.51414941154438	1.81523640233327	2.48681075684797	0.0128893943123251	0.0341220513117043	49.0294168858907	35.5964858861739	40.6674	5.44527148184109	0	0	Pogk	pogo transposable element with KRAB domain [Source:MGI Symbol;Acc:MGI:1918842]
ENSMUSG00000038015	32657.5739884718	4.49904391775072	0.0253163097723469	177.71325908901	0	0	62310.2601848563	62511.3843812198	62828.9988495645	2838.2430431504	2787.98350877763	2668.57396326199	Prm2	protamine 2 [Source:MGI Symbol;Acc:MGI:97766]
ENSMUSG00000030209	41.6187604355698	4.49775200794157	2.13160816456516	2.11002757575715	0.0348559807111012	0.0806518757402725	63.3296634776088	100.856710010826	74.9136390180131	0	0	10.612550106971	Grin2b	glutamate receptor, ionotropic, NMDA2B (epsilon 2) [Source:MGI Symbol;Acc:MGI:95821]
ENSMUSG00000072934	9.19963187237041	4.49586570384571	1.28538128534501	3.49769033912686	0.00046930569435234	0.00168060896074289	12.2573542214727	27.6861556892464	12.8423381173737	0	0	2.41194320612978	Trpc5os	transient receptor potential cation channel, subfamily C, member 5, opposite strand [Source:MGI Symbol;Acc:MGI:3641805]
ENSMUSG00000028287	1481.44198024496	4.48566587283325	0.119564846130511	37.5165947015639	4.94059467619035e-308	7.14490418462552e-306	2572.00149413901	3037.56679562017	2900.22802484022	160.007208158715	105.969416664764	112.878942046874	1700009N14Rik	RIKEN cDNA 1700009N14 gene [Source:MGI Symbol;Acc:MGI:1922721]
ENSMUSG00000022425	17.4686098566779	4.48141319515302	1.91452772822703	2.34074081512682	0.0192455224096635	0.0484625556203654	10.2144618512272	49.4395637307971	40.6674	0	4.49022951969339	0	Enpp2	ectonucleotide pyrophosphatase/phosphodiesterase 2 [Source:MGI Symbol;Acc:MGI:1321390]
ENSMUSG00000022037	1102.11057780898	4.47855455311068	0.108205570549365	41.3893160063093	0	0	2296.21102415588	1951.87397609187	2080.45877501454	87.5432107465222	100.581141241132	95.9953396039651	Clu	clusterin [Source:MGI Symbol;Acc:MGI:88423]
ENSMUSG00000001062	28.918809392797	4.47031456450486	0.744443868298854	6.00490480863263	1.91444190878722e-09	1.20678732993344e-08	18.386031332209	51.4171462800289	96.3175358803026	3.35093629651759	4.04120656772405	0	Vps9d1	VPS9 domain containing 1 [Source:MGI Symbol;Acc:MGI:1914143]
ENSMUSG00000009927	9.18460827947802	4.45764313251789	2.93922006958209	1.51660747646967	0.129365816632279	0.233821052384196	0	9.88791274615941	42.8077937245789	0	0	2.41194320612978	Rps25	ribosomal protein S25 [Source:MGI Symbol;Acc:MGI:1922867]
ENSMUSG00000003345	2319.06271902985	4.45760798575603	0.256401607527538	17.3852575603578	1.06706880745013e-67	3.07202193478176e-66	4545.43552379611	4700.71371952418	4062.45962446254	156.656271862198	272.556931845389	176.554	Csnk1g2	casein kinase 1, gamma 2 [Source:MGI Symbol;Acc:MGI:1920014]
ENSMUSG00000031633	25.5832741018764	4.45427562739069	0.736809932211092	6.04535231226302	1.49083860971722e-09	9.48902752766278e-09	77.6299100693269	43.5068160831014	25.6846762347474	1.2566011111941	4.93925247166273	0.482388641225955	Slc25a4	solute carrier family 25 (mitochondrial carrier, adenine nucleotide translocator), member 4 [Source:MGI Symbol;Acc:MGI:1353495]
ENSMUSG00000002409	1354.4960584848	4.45281524344295	0.102444623485088	43.4655825943968	0	0	2649.63140420834	2748.83974343232	2373.6921620279	129.011047415927	103.275278952948	122.526714871393	Dyrk1b	dual-specificity tyrosine phosphorylation regulated kinase 1b [Source:MGI Symbol;Acc:MGI:1330302]
ENSMUSG00000043460	37.0770268630785	4.4501284741095	0.62607464149889	7.10798390341352	1.17750288553291e-12	9.17581665875485e-12	136.873788806445	39.5516509846377	36.3866246658921	5.02640444477639	2.69413771181604	1.92955456490382	Elfn2	leucine rich repeat and fibronectin type III, extracellular 2 [Source:MGI Symbol;Acc:MGI:3608416]
ENSMUSG00000051675	8.91357466150747	4.44719778182897	1.28561422938615	3.45920080859122	0.000541780818415946	0.00192078906460636	20.4289237024544	17.7982429430869	12.8423381173737	0	0	2.41194320612978	Trim32	tripartite motif-containing 32 [Source:MGI Symbol;Acc:MGI:1917057]
ENSMUSG00000037905	249.962896141379	4.43781627709983	0.201122327711093	22.0652591266478	6.81768976133455e-108	2.92384853661096e-106	461.69367567547	494.395637307971	477.306900029055	18.4301496308468	23.3491935024056	24.6018207025237	Bri3bp	Bri3 binding protein [Source:MGI Symbol;Acc:MGI:1924059]
ENSMUSG00000023963	13.5524861409495	4.43530447614997	1.05858235634305	4.18985301386664	2.791352100249e-05	0.000119463338165164	24.5147084429453	29.6637382384782	23.5442865485184	0	3.59218361575472	0	Cyp39a1	cytochrome P450, family 39, subfamily a, polypeptide 1 [Source:MGI Symbol;Acc:MGI:1927096]
ENSMUSG00000073730	626.631114233047	4.42036460576455	0.153612247382439	28.7761209219174	4.26899312466174e-182	3.38174952174637e-180	1054.13246304665	1386.28536701155	1151.52965119117	61.5734544485108	43.5552263410259	62.7105233593742	Ppp1r14bl	protein phosphatase 1, regulatory inhibitor subunit 14B like [Source:MGI Symbol;Acc:MGI:1914005]
ENSMUSG00000020610	314.009955188331	4.42007684456199	0.58139578049628	7.60252652812342	2.90404422129568e-14	2.47890171449927e-13	733.398360918114	535.92487084184	530.816642184779	51.520645558958	18.4099410307429	13.9892705955527	Amz2	archaelysin family metallopeptidase 2 [Source:MGI Symbol;Acc:MGI:104837]
ENSMUSG00000027443	130.993	4.41735388405571	1.05718604334297	4.17840730292599	2.93557596254942e-05	0.000125506216040657	214.503698875772	245.220236104753	291.092997327137	2.0943351853235	29.1864918780071	3.85910912980764	Cst12	cystatin 12 [Source:MGI Symbol;Acc:MGI:1916612]
ENSMUSG00000029557	3.18739973803459	4.41454242302924	2.31559877295624	1.9064366739983	0.0565935743782079	0.120937162292401	0	11.8654952953913	6.42116905868684	0.837734074129399	0	0	Mrm2	mitochondrial rRNA methyltransferase 2 [Source:MGI Symbol;Acc:MGI:1915267]
ENSMUSG00000018796	2385.40312453543	4.41340667397569	0.098270347197381	44.9108688413519	0	0	4400.39016550869	4641.38624304723	4627.52250162698	170.060017048268	216.429062849222	256.630757132208	Acsl1	acyl-CoA synthetase long-chain family member 1 [Source:MGI Symbol;Acc:MGI:102797]
ENSMUSG00000024500	319.853442998564	4.40125897658623	0.18643914507075	23.6069467863954	3.27029223208017e-123	1.67377055515971e-121	627.167957665351	676.333231837304	528.67625249855	28.0640914833349	25.5943082622523	33.2848162445909	Ppp2r2b	protein phosphatase 2, regulatory subunit B, beta [Source:MGI Symbol;Acc:MGI:1920180]
ENSMUSG00000041536	19.8659859917899	4.40061951412129	1.88772752273823	2.33117304330978	0.0197442369586631	0.0495278489420923	24.5147084429453	59.3274764769565	29.9654556072053	0	5.38827542363207	0	Serpina3a	serine (or cysteine) peptidase inhibitor, clade A, member 3A [Source:MGI Symbol;Acc:MGI:1921319]
ENSMUSG00000036687	43.3940689559891	4.39856192240187	0.506134459416416	8.6905007959219	3.60845286766883e-18	3.72125442082896e-17	91.930156661045	100.856710010826	55.6501318419526	2.5132022223882	3.14316066378538	6.27105233593742	Tmem184a	transmembrane protein 184a [Source:MGI Symbol;Acc:MGI:2385897]
ENSMUSG00000029155	2179.2111861065	4.39210094863136	0.0846458154186499	51.8879867469934	0	0	3891.70996531757	4194.45258692082	4394.22002582803	199.380709642797	176.016997171981	219.48683175781	Spata18	spermatogenesis associated 18 [Source:MGI Symbol;Acc:MGI:1920722]
ENSMUSG00000027482	258.195714826965	4.39136712779057	0.198171548841538	22.1594227499428	8.46285373537888e-109	3.69307059322481e-107	514.808877301852	512.193880251058	451.622223794308	24.2942881497526	20.2060328386203	26.0489866262016	Bpifa3	BPI fold containing family A, member 3 [Source:MGI Symbol;Acc:MGI:1920638]
ENSMUSG00000048100	10.9562307511343	4.38578557319109	1.19292244272482	3.67650520780987	0.000236451030389266	0.000887905031688196	26.5576008131908	27.6861556892464	8.56155874491579	2.9320692594529	0	0	Taf13	TATA-box binding protein associated factor 13 [Source:MGI Symbol;Acc:MGI:1913500]
ENSMUSG00000038517	1.75551808739707	4.38236008665263	2.97042031662603	1.47533332643993	0.14012295083201	0.249600277785406	0	7.91033019692753	2.14038968622895	0	0	0.482388641225955	Tbkbp1	TBK1 binding protein 1 [Source:MGI Symbol;Acc:MGI:1920424]
ENSMUSG00000006378	1.7449311533702	4.38234394434247	2.97716527050813	1.47198544459526	0.141024808166634	0.250955149401692	0	7.91033019692753	2.14038968622895	0.418867037064699	0	0	Gcat	glycine C-acetyltransferase (2-amino-3-ketobutyrate-coenzyme A ligase) [Source:MGI Symbol;Acc:MGI:1349389]
ENSMUSG00000026627	19.1770313328698	4.38086662341055	1.87110662380185	2.34132388164454	0.0192154895003318	0.048406530872114	36.772062664418	49.4395637307971	23.5442865485184	0	0	5.30627505348551	Pacc1	proton activated chloride channel 1 [Source:MGI Symbol;Acc:MGI:1914200]
ENSMUSG00000068264	1.73926853473316	4.36990302875737	2.98012214790878	1.46635	0.142552876614835	0.25320338852595	2.04289237024544	7.91033019692753	0	0	0	0.482388641225955	Ap5s1	adaptor-related protein 5 complex, sigma 1 subunit [Source:MGI Symbol;Acc:MGI:1916846]
ENSMUSG00000030849	1.71779663053735	4.36040237837892	3.26078471807313	1.33722485701404	0.181149250443712	0.305326951958165	0	9.88791274615941	0	0.418867037064699	0	0	Fgfr2	fibroblast growth factor receptor 2 [Source:MGI Symbol;Acc:MGI:95523]
ENSMUSG00000015745	145.159969948981	4.35679297115153	0.332818879969478	13.0905823958998	3.72738791876282e-39	6.84749239965335e-38	251.27576154019	350.032111214043	229.021696426497	6.70187259303519	23.798216454375	10.1301614657451	Plekho1	pleckstrin homology domain containing, family O member 1 [Source:MGI Symbol;Acc:MGI:1914470]
ENSMUSG00000022208	11.496205297118	4.35162739910505	1.21114796527813	3.59297750882629	0.000326920815646374	0.00119973862029919	6.12867711073633	3.95516509846377	55.6501318419526	0	1.79609180787736	1.44716592367787	Jph4	junctophilin 4 [Source:MGI Symbol;Acc:MGI:2443113]
ENSMUSG00000037594	267.630425079561	4.3512950523797	0.638695205888142	6.81278802825673	9.57251400287451e-12	7.05292397237857e-11	445.350536713507	593.274764769565	492.289627832658	39.7923685211464	27.839423022099	7.23582961838933	Clba1	clathrin binding box of aftiphilin containing 1 [Source:MGI Symbol;Acc:MGI:2443738]
ENSMUSG00000020393	83.0314014727074	4.34831564399368	1.33830731441289	3.2491159520422	0.00115764279463276	0.00385478003663926	185.903205692335	156.229021389319	132.704160546195	0	10.3275278952948	13.0244933131008	Kremen1	kringle containing transmembrane protein 1 [Source:MGI Symbol;Acc:MGI:1933988]
ENSMUSG00000031329	18.4062074119012	4.34721814516367	0.992684613200897	4.37925408266996	1.19086221222075e-05	5.35844910759387e-05	63.3296634776088	35.5964858861739	6.42116905868684	4.60753740771169	0	0.482388641225955	Tsx	testis specific X-linked gene [Source:MGI Symbol;Acc:MGI:108118]
ENSMUSG00000030498	14.0764718795886	4.34638861472132	0.98939115673073	4.39299319096726	1.11800630190165e-05	5.05255972992397e-05	24.5147084429453	47.4619811815652	8.56155874491579	1.6754681482588	2.2451147598467	0	Gas2	growth arrest specific 2 [Source:MGI Symbol;Acc:MGI:95657]
ENSMUSG00000039278	13.4358599649362	4.34629117811148	1.15326492139938	3.76868410498227	0.000164110420354201	0.000629756648548347	40.8578474049089	5.93274764769565	29.9654556072053	0	0	3.85910912980764	Pcsk1n	proprotein convertase subtilisin/kexin type 1 inhibitor [Source:MGI Symbol;Acc:MGI:1353431]
ENSMUSG00000040105	211.562078905673	4.34550071588352	0.212521443635872	20.447351766201	6.34263390553927e-93	2.40497981351195e-91	400.406904568107	409.36	400.252871324813	21.7810859273644	20.2060328386203	17.3659910841344	Plpp6	phospholipid phosphatase 6 [Source:MGI Symbol;Acc:MGI:1921661]
ENSMUSG00000022763	3.37138074308541	4.34370670371502	2.50926441577597	1.73106774894098	0.0834396817220702	0.165429510852445	0	0	19.2635071760605	0	0	0.964777282451911	Aifm3	apoptosis-inducing factor, mitochondrion-associated 3 [Source:MGI Symbol;Acc:MGI:1919418]
ENSMUSG00000121910	49.432003863965	4.32276591641223	0.518692773134724	8.33396210687023	7.81809567424661e-17	7.57271463400351e-16	110.316187993254	90.9687972646666	81.3348	9.21507481542339	0.898045903938679	3.85910912980764		novel protein
ENSMUSG00000064016	9.42066800750868	4.31864991880424	1.37281109467087	3.14584427206981	0.00165608158881235	0.00538475469805468	34.7291702941726	1.97758254923188	17.1231174898316	0	2.69413771181604	0	Ct45a	cancer/testis antigen 45 [Source:MGI Symbol;Acc:MGI:2685494]
ENSMUSG00000050645	178.636816891329	4.31370929968772	0.608416424223218	7.09006057026674	1.34053315346894e-12	1.04201317685583e-11	367.72062664418	338.166615918652	314.637283875655	25.132022223882	4.93925247166273	21.225100213942	Defb19	defensin beta 19 [Source:MGI Symbol;Acc:MGI:2385955]
ENSMUSG00000024014	168.172891007404	4.3129609074147	0.246726562371833	17.4807319728907	2.00903481489915e-68	5.85160796086668e-67	347.291702941726	348.054528664811	265.408321092389	15.9169474084586	18.8589639827123	13.5068819543268	Pim1	proviral integration site 1 [Source:MGI Symbol;Acc:MGI:97584]
ENSMUSG00000026576	28.5096346667562	4.31023510761879	0.658325682646448	6.54726865628542	5.85988939117843e-11	4.0783124990535e-10	65.3725558478542	65.2602241246521	32.1058452934342	0.418867037064699	4.04120656772405	3.85910912980764	Atp1b1	ATPase, Na+/K+ transporting, beta 1 polypeptide [Source:MGI Symbol;Acc:MGI:88108]
ENSMUSG00000023456	369.380114001599	4.30370866964738	0.193811608906701	22.2056289296847	3.03024066410467e-109	1.33169975757844e-107	749.741499880078	617.005755360347	742.715221121445	41.4678366694052	22.9001705504363	42.4502004278841	Tpi1	triosephosphate isomerase 1 [Source:MGI Symbol;Acc:MGI:98797]
ENSMUSG00000029603	18.5748879536471	4.2988204430885	1.8380957783018	2.33873582314635	0.0193491099479475	0.048703679502656	34.7291702941726	43.5068160831014	27.8250659209763	0	5.38827542363207	0	Dtx1	deltex 1, E3 ubiquitin ligase [Source:MGI Symbol;Acc:MGI:1352744]
ENSMUSG00000024042	176.727640855663	4.28882860850367	0.244759305563796	17.522637591345	9.62574799112158e-69	2.83685847785732e-67	377.935088495407	346.076946115579	284.67182826845	18.8490166679115	12.5726426551415	20.2603229314901	Sik1	salt inducible kinase 1 [Source:MGI Symbol;Acc:MGI:104754]
ENSMUSG00000031488	11.7934086153899	4.27929405083782	1.18375632807162	3.61501260804994	0.00030033300498584	0.0011093678595215	55.158093996627	7.91033019692753	4.28077937245789	2.5132022223882	0.898045903938679	0	Rab11fip1	RAB11 family interacting protein 1 (class I) [Source:MGI Symbol;Acc:MGI:1923017]
ENSMUSG00000087376	200.105230735636	4.27906800783852	0.240841225751925	17.7671741807448	1.26925514593188e-70	3.80378945782042e-69	345.24881057148	381.673432001753	415.235599128416	22.1999529644291	24.6962623583137	11.5773273894229	Gm15517	predicted gene 15517 [Source:MGI Symbol;Acc:MGI:3782964]
ENSMUSG00000032936	7.55714679117222	4.27602533980082	1.44299254942973	2.96330382405003	0.00304355995381081	0.00940674829660661	34.7291702941726	1.97758254923188	6.42116905868684	0.418867037064699	1.79609180787736	0	Camkv	CaM kinase-like vesicle-associated [Source:MGI Symbol;Acc:MGI:2384296]
ENSMUSG00000079476	14.4507502148842	4.27139936255331	1.1046168688168	3.86686052253445	0.000110245437852543	0.000434036882105755	24.5147084429453	49.4395637307971	8.56155874491579	4.18867037064699	0	0	Fam236e	family with sequence similarity 236, member E [Source:MGI Symbol;Acc:MGI:1922693]
ENSMUSG00000031828	19.2193125438192	4.2650916994275	0.812824362654492	5.24724884660041	1.54387303173109e-07	8.28707332569682e-07	24.5147084429453	57.3498939277246	27.8250659209763	2.9320692594529	2.69413771181604	0	Klhl36	kelch-like 36 [Source:MGI Symbol;Acc:MGI:2385305]
ENSMUSG00000074406	29.9636151716353	4.26503797902677	0.601642386995173	7.08899185166785	1.35092479224875e-12	1.0494348308056e-11	69.4583405883451	67.237806673884	34.2462349796631	3.35093629651759	4.04120656772405	1.44716592367787	Zfp628	zinc finger protein 628 [Source:MGI Symbol;Acc:MGI:2665174]
ENSMUSG00000029189	11.0628383946503	4.26014948294774	1.1771664583137	3.61898646776808	0.000295759101972462	0.00109442307385644	22.4718160726999	27.6861556892464	12.8423381173737	0	0	3.37672048858169	Sel1l3	sel-1 suppressor of lin-12-like 3 (C. elegans) [Source:MGI Symbol;Acc:MGI:1916941]
ENSMUSG00000000125	68.9258291664446	4.25026148178278	0.444704846009797	9.55748856779749	1.20648828875798e-21	1.43616807319591e-20	220.632375986508	65.2602241246521	107.019484311447	7.12073963009989	6.28632132757075	7.23582961838933	Wnt3	wingless-type MMTV integration site family, member 3 [Source:MGI Symbol;Acc:MGI:98955]
ENSMUSG00000028523	103.421636120515	4.24881517933858	0.327045041371287	12.9915291224825	1.36668840591616e-38	2.49230259595005e-37	216.546591246017	197.758254923188	175.511954270774	15.0792133343292	10.3275278952948	5.30627505348551	Dynlt5	dynein light chain Tctex-type 5 [Source:MGI Symbol;Acc:MGI:1914594]
ENSMUSG00000027637	11.1817911031721	4.24418146923442	3.02000256742576	1.40535690764401	0.15991517398433	0.277116485835741	14.3002465917181	49.4395637307971	0	3.35093629651759	0	0	Rab5if	RAB5 interacting factor [Source:MGI Symbol;Acc:MGI:1914638]
ENSMUSG00000032278	454.743565281439	4.23574494098145	0.196577355681889	21.547471356955	5.59185727226259e-103	2.28769502944506e-101	1021.44618512272	791.033019692753	779.101845787337	59.0602522261226	49.8415476685967	27.9785411911054	Paqr5	progestin and adipoQ receptor family member V [Source:MGI Symbol;Acc:MGI:1921340]
ENSMUSG00000044320	834.914600392911	4.23187420889005	0.117870010550485	35.9028915762886	2.75330216629389e-282	3.45887061032295e-280	1589.37026405096	1562.29021389319	1605.29226467171	90.0564129689104	92.0497051537146	70.4287416189895	1700001O22Rik	RIKEN cDNA 1700001O22 gene [Source:MGI Symbol;Acc:MGI:1923631]
ENSMUSG00000008429	288.18564680464	4.22806128288197	0.56084258156742	7.53876653064672	4.74437484498693e-14	4.00310650930139e-13	484.16549174817	603.162677515724	554.360928733297	53.1961137072168	19.7570098866509	14.4716592367787	Herpud2	HERPUD family member 2 [Source:MGI Symbol;Acc:MGI:1915393]
ENSMUSG00000023047	377.434637809185	4.22459923360556	0.182265483682497	23.1782735175725	7.54273556955334e-119	3.70786570270889e-117	690.49762114296	634.803998303434	824.050029198145	28.9018255574643	45.3513181489033	41.0030345042062	Amhr2	anti-Mullerian hormone type 2 receptor [Source:MGI Symbol;Acc:MGI:105062]
ENSMUSG00000063524	70.2707124848054	4.22237717496846	0.407984926260498	10.3493460252805	4.2135405282523e-25	5.72719164479496e-24	116.44486510399	144.363526093927	139.125329604882	2.5132022223882	8.08241313544811	11.094938748197	Eno1	enolase 1, alpha non-neuron [Source:MGI Symbol;Acc:MGI:95393]
ENSMUSG00000050721	407.55776866723	4.21534328008241	0.183611697028448	22.9579234237419	1.22802104454287e-116	5.9197278027053e-115	700.712082994187	804.876097537376	815.488470453229	56.1281829666697	37.2689050134552	30.8728730384612	Plekho2	pleckstrin homology domain containing, family O member 2 [Source:MGI Symbol;Acc:MGI:2143132]
ENSMUSG00000029762	22.3897853895777	4.20340098466292	0.744071974014348	5.64918600815608	1.61209348260622e-08	9.37335513939858e-08	44.9436321453998	39.5516509846377	42.8077937245789	0	2.69413771181604	4.3414977710336	Akr1b8	aldo-keto reductase family 1, member B8 [Source:MGI Symbol;Acc:MGI:107673]
ENSMUSG00000020070	5.82263319243411	4.20327689131358	1.58412139307361	2.65338054879627	0.00796899707769618	0.0221723527193081	6.12867711073633	9.88791274615941	17.1231174898316	0	1.79609180787736	0	Rufy2	RUN and FYVE domain-containing 2 [Source:MGI Symbol;Acc:MGI:1917682]
ENSMUSG00000006717	15.9396246590378	4.1982736859669	2.03645918695277	2.06155552385459	0.0392500721227755	0.0891278340315791	59.2438787371179	7.91033019692753	23.5442865485184	0	4.93925247166273	0	Acot13	acyl-CoA thioesterase 13 [Source:MGI Symbol;Acc:MGI:1914084]
ENSMUSG00000031654	6.07161217833201	4.19626983160994	1.62564178261796	2.58130042945389	0.00984288830045617	0.0267459038218863	22.4718160726999	9.88791274615941	2.14038968622895	0	0	1.92955456490382	Cbln1	cerebellin 1 precursor protein [Source:MGI Symbol;Acc:MGI:88281]
ENSMUSG00000008813	2478.06457135229	4.19419002579988	0.0779145923690677	53.8306098802742	0	0	4643.49435756789	4860.89790601197	4593.27626664732	262.629632239566	225.409521888608	282.67974375841	Tppp2	tubulin polymerization-promoting protein family member 2 [Source:MGI Symbol;Acc:MGI:2684923]
ENSMUSG00000074604	6.08801753617487	4.19390942517004	1.79999681384626	2.32995380486726	0.019808592799741	0.0496692477117698	30.6433855536817	3.95516509846377	0	0	0	1.92955456490382	Mgst2	microsomal glutathione S-transferase 2 [Source:MGI Symbol;Acc:MGI:2448481]
ENSMUSG00000049404	13.7389803614496	4.19045611270522	1.08601236008905	3.85857128952163	0.000114051800852689	0.000447888300348878	40.8578474049089	13.8430778446232	23.5442865485184	4.18867037064699	0	0	Rarres1	retinoic acid receptor responder (tazarotene induced) 1 [Source:MGI Symbol;Acc:MGI:1924461]
ENSMUSG00000063873	9.56701217629222	4.18540871344822	1.29277695840002	3.2375335020112	0.0012056778236719	0.00400187218922002	8.17156948098178	35.5964858861739	10.7019484311447	2.9320692594529	0	0	Slc24a3	solute carrier family 24 (sodium/potassium/calcium exchanger), member 3 [Source:MGI Symbol;Acc:MGI:2137513]
ENSMUSG00000026470	6.84488214396049	4.18211990467091	1.44892369134797	2.88636311880591	0.00389722229532691	0.0117550974457401	8.17156948098178	15.8206603938551	14.9827278036026	2.0943351853235	0	0	Stx6	syntaxin 6 [Source:MGI Symbol;Acc:MGI:1926235]
ENSMUSG00000045330	33.3207625223096	4.18036137398252	1.29805813923971	3.22047314185096	0.00127979183984037	0.00423430995267216	46.9865245156452	63.2826415754202	79.194418390471	0	8.53143608741745	1.92955456490382	Magec2	MAGE family member C2 [Source:MGI Symbol;Acc:MGI:1921687]
ENSMUSG00000010461	232.278855605134	4.17649598623341	0.222006694875775	18.8124776532996	5.96820979587612e-79	1.96887600083054e-77	424.921613011052	379.695849452521	515.833914381176	23.4565540756232	18.4099410307429	31.3552616796871	Eya4	EYA transcriptional coactivator and phosphatase 4 [Source:MGI Symbol;Acc:MGI:1337104]
ENSMUSG00000026457	75.6342873858486	4.17414728936675	0.370511796647494	11.2658957883007	1.93375328872103e-29	2.9151623820392e-28	130.745111695708	108.767040207754	190.494682074376	8.79620777835869	5.83729837560141	9.16538418329315	Adipor1	adiponectin receptor 1 [Source:MGI Symbol;Acc:MGI:1919924]
ENSMUSG00000095789	419.840995336928	4.1739491530534	0.364009360693482	11.466598400386	1.94141596441633e-30	3.00689792645652e-29	759.955961731305	957.149953828231	669.94197178966	64.5055237079637	39.5140197733019	27.9785411911054	Nupr2	nuclear protein transcriptional regulator 2 [Source:MGI Symbol;Acc:MGI:1923099]
ENSMUSG00000057667	3.01464912871391	4.17168566973724	2.61390412516667	1.59595971006444	0.110497788930058	0.206717960427667	0	0	17.1231174898316	0	0	0.964777282451911	Bloc1s3	biogenesis of lysosomal organelles complex-1, subunit 3 [Source:MGI Symbol;Acc:MGI:2678952]
ENSMUSG00000070639	1788.92836101003	4.17066099857723	0.095760328042927	43.5531193743157	0	0	3272.7135771332	3415.28506252346	3480.27362980827	157.494005936327	218.225154657099	189.578736001801	Lrrc8b	leucine rich repeat containing 8 family, member B [Source:MGI Symbol;Acc:MGI:2141353]
ENSMUSG00000032803	1138.01582901862	4.16647552049877	0.304597352124566	13.6786334202763	1.36228906936772e-42	2.64731080558224e-41	2118.47938794453	2159.52014376122	2189.61864901221	73.3017314863224	134.257862638832	152.917199268628	Cdv3	carnitine deficiency-associated gene expressed in ventricle 3 [Source:MGI Symbol;Acc:MGI:2448759]
ENSMUSG00000047150	362.376723063661	4.15743913372033	0.200386965867607	20.7470536605015	1.30337959521958e-95	5.03420249246768e-94	621.039280554615	650.624658697289	787.663404532253	52.7772466701521	26.9413771181604	35.2143708094948	Cimip3	ciliary microtubule inner protein 3 [Source:MGI Symbol;Acc:MGI:1922712]
ENSMUSG00000025203	19.8047778452956	4.15554234193446	1.97322372100538	2.10596613941838	0.0352072937260108	0.0814041851776159	16.3431389619636	53.3947288292608	42.8077937245789	6.28300555597049	0	0	Scd2	stearoyl-Coenzyme A desaturase 2 [Source:MGI Symbol;Acc:MGI:98240]
ENSMUSG00000021097	2159.71331888974	4.15023883069133	0.0926637034401547	44.7881821750379	0	0	4151.15729633874	3961.09784611146	4156.63677065662	273.101308166184	220.919292368915	195.367399696512	Clmn	calmin [Source:MGI Symbol;Acc:MGI:2136957]
ENSMUSG00000035506	1.50732456435696	4.14225333344717	3.43472059842907	1.20599426204906	0.227819702870863	NA	0	0	8.56155874491579	0	0	0.482388641225955	Slc12a8	solute carrier family 12 (potassium/chloride transporters), member 8 [Source:MGI Symbol;Acc:MGI:2443672]
ENSMUSG00000039395	6.98944	4.14029096134166	1.47061405537179	2.81534842280216	0.00487243759733181	0.0143530332539118	10.2144618512272	5.93274764769565	23.5442865485184	0	2.2451147598467	0	Mreg	melanoregulin [Source:MGI Symbol;Acc:MGI:2151839]
ENSMUSG00000025158	7.32537863715386	4.13295930627453	1.61779181546125	2.55469168948427	0.0106281890874653	0.0287603976677123	26.5576008131908	0	14.9827278036026	0	0	2.41194320612978	Rfng	RFNG O-fucosylpeptide 3-beta-N-acetylglucosaminyltransferase [Source:MGI Symbol;Acc:MGI:894275]
ENSMUSG00000107504	11.0156446103338	4.13235083411435	1.0755947686027	3.8419216555717	0.000122074804554707	0.000476536203467322	14.3002465917181	11.8654952953913	36.3866246658921	2.0943351853235	0	1.44716592367787	Gm35549	predicted gene, 35549 [Source:MGI Symbol;Acc:MGI:5594708]
ENSMUSG00000003134	16.9039027336608	4.13001197147253	1.83453982415891	2.25125228522419	0.024369563024762	0.0596153137960198	38.8149550346634	33.618903336942	23.5442865485184	5.44527148184109	0	0	Tbc1d8	TBC1 domain family, member 8 [Source:MGI Symbol;Acc:MGI:1927225]
ENSMUSG00000052889	1.49107501169304	4.12640030850828	3.16227181085847	1.30488476491465	0.19193208970939	NA	2.04289237024544	0	6.42116905868684	0	0	0.482388641225955	Prkcb	protein kinase C, beta [Source:MGI Symbol;Acc:MGI:97596]
ENSMUSG00000036241	73.6624413713754	4.12556192903482	0.428109288117333	9.63670269144947	5.59565091310896e-22	6.75005920527024e-21	149.131143027917	114.699787855449	154.108057408484	9.21507481542339	1.79609180787736	13.0244933131008	Ube2r2	ubiquitin-conjugating enzyme E2R 2 [Source:MGI Symbol;Acc:MGI:1914865]
ENSMUSG00000022715	7.24902804079243	4.12233815588436	1.50184633320209	2.74484683602424	0.00605391450755403	0.0174127046092621	2.04289237024544	19.7758254923188	19.2635071760605	0	0	2.41194320612978	Tmem114	transmembrane protein 114 [Source:MGI Symbol;Acc:MGI:1921970]
ENSMUSG00000027445	126.115651153156	4.11968585674387	0.265982131089564	15.4885812812615	4.14332935763102e-54	1.01839105179559e-52	241.061299688962	241.26507100629	233.302475798955	15.9169474084586	12.1236197031722	13.0244933131008	Cst9	cystatin 9 [Source:MGI Symbol;Acc:MGI:1340053]
ENSMUSG00000040576	134.812745411771	4.11815899486502	0.295227626213807	13.949097676525	3.18610762909157e-44	6.37067855032345e-43	286.004931834362	219.511662964739	258.987152033703	10.8905429636822	10.3275278952948	23.1546547788459	Tmem270	transmembrane protein 270 [Source:MGI Symbol;Acc:MGI:1923879]
ENSMUSG00000047654	1666.05265438019	4.11331962128286	0.100618768488876	40.8802421561898	0	0	3297.22828557615	3219.5043901495	2934.47425981989	216.55425816245	161.648262708962	166.906469864181	Tssk6	testis-specific serine kinase 6 [Source:MGI Symbol;Acc:MGI:2148775]
ENSMUSG00000033623	1.47482545902912	4.11151863809642	3.15557182467057	1.30293932971266	0.192595475315727	NA	4.08578474049089	0	4.28077937245789	0	0	0.482388641225955	Pcgf3	polycomb group ring finger 3 [Source:MGI Symbol;Acc:MGI:1916837]
ENSMUSG00000021054	7.78958191759418	4.10870402813244	1.42069772144581	2.89203253169937	0.00382758311839055	0.0115683235099449	12.2573542214727	27.6861556892464	4.28077937245789	2.5132022223882	0	0	Sgpp1	sphingosine-1-phosphate phosphatase 1 [Source:MGI Symbol;Acc:MGI:2135760]
ENSMUSG00000021476	1062.78556514289	4.10419030277813	0.113386802218585	36.1963669710532	6.94428366204059e-287	8.90371710358751e-285	2149.12277349821	1953.8515586411	1924.21032791982	136.969521120157	112.704760944304	99.8544487337728	Habp4	hyaluronic acid binding protein 4 [Source:MGI Symbol;Acc:MGI:1891713]
ENSMUSG00000041688	11.0013327209333	4.10330568676925	1.14328831868657	3.58903840763735	0.000331899945320449	0.00121729272189632	22.4718160726999	35.5964858861739	4.28077937245789	0	2.69413771181604	0.964777282451911	Amot	angiomotin [Source:MGI Symbol;Acc:MGI:108440]
ENSMUSG00000024759	1161.89427617886	4.10193488323857	0.115888527643645	35.3955215985826	2.00104112598956e-274	2.46405430533981e-272	2120.52228031477	2183.25	2283.79579520629	108.486562599757	157.607056141238	117.702828459133	Atl3	atlastin GTPase 3 [Source:MGI Symbol;Acc:MGI:1924270]
ENSMUSG00000004892	0.713463228742982	4.10192912549479	4.03316924347963	1.01704859822739	0.309130311066151	NA	0	0	4.28077937245789	0	0	0	Bcan	brevican [Source:MGI Symbol;Acc:MGI:1096385]
ENSMUSG00000011118	0.713463228742982	4.10192912549479	4.03316924347963	1.01704859822739	0.309130311066151	NA	0	0	4.28077937245789	0	0	0	Panx3	pannexin 3 [Source:MGI Symbol;Acc:MGI:1918881]
ENSMUSG00000011305	0.713463228742982	4.10192912549479	4.03316924347963	1.01704859822739	0.309130311066151	NA	0	0	4.28077937245789	0	0	0	Plin5	perilipin 5 [Source:MGI Symbol;Acc:MGI:1914218]
ENSMUSG00000013846	0.713463228742982	4.10192912549479	4.03316924347963	1.01704859822739	0.309130311066151	NA	0	0	4.28077937245789	0	0	0	St3gal1	ST3 beta-galactoside alpha-2,3-sialyltransferase 1 [Source:MGI Symbol;Acc:MGI:98304]
ENSMUSG00000018126	0.713463228742982	4.10192912549479	4.03316924347963	1.01704859822739	0.309130311066151	NA	0	0	4.28077937245789	0	0	0	Baiap2l2	BAI1-associated protein 2-like 2 [Source:MGI Symbol;Acc:MGI:2652819]
ENSMUSG00000019577	0.713463228742982	4.10192912549479	4.03316924347963	1.01704859822739	0.309130311066151	NA	0	0	4.28077937245789	0	0	0	Pdk4	pyruvate dehydrogenase kinase, isoenzyme 4 [Source:MGI Symbol;Acc:MGI:1351481]
ENSMUSG00000019647	0.713463228742982	4.10192912549479	4.03316924347963	1.01704859822739	0.309130311066151	NA	0	0	4.28077937245789	0	0	0	Sema6a	sema domain, transmembrane domain (TM), and cytoplasmic domain, (semaphorin) 6A [Source:MGI Symbol;Acc:MGI:1203727]
ENSMUSG00000020774	0.713463228742982	4.10192912549479	4.03316924347963	1.01704859822739	0.309130311066151	NA	0	0	4.28077937245789	0	0	0	Aspa	aspartoacylase [Source:MGI Symbol;Acc:MGI:87914]
ENSMUSG00000021032	0.713463228742982	4.10192912549479	4.03316924347963	1.01704859822739	0.309130311066151	NA	0	0	4.28077937245789	0	0	0	Ngb	neuroglobin [Source:MGI Symbol;Acc:MGI:2151886]
ENSMUSG00000024349	0.713463228742982	4.10192912549479	4.03316924347963	1.01704859822739	0.309130311066151	NA	0	0	4.28077937245789	0	0	0	Sting1	stimulator of interferon response cGAMP interactor 1 [Source:MGI Symbol;Acc:MGI:1919762]
ENSMUSG00000025161	0.713463228742982	4.10192912549479	4.03316924347963	1.01704859822739	0.309130311066151	NA	0	0	4.28077937245789	0	0	0	Slc16a3	solute carrier family 16 (monocarboxylic acid transporters), member 3 [Source:MGI Symbol;Acc:MGI:1933438]
ENSMUSG00000025854	0.713463228742982	4.10192912549479	4.03316924347963	1.01704859822739	0.309130311066151	NA	0	0	4.28077937245789	0	0	0	Fam20c	FAM20C, golgi associated secretory pathway kinase [Source:MGI Symbol;Acc:MGI:2136853]
ENSMUSG00000026176	0.713463228742982	4.10192912549479	4.03316924347963	1.01704859822739	0.309130311066151	NA	0	0	4.28077937245789	0	0	0	Ctdsp1	CTD small phosphatase 1 [Source:MGI Symbol;Acc:MGI:2654470]
ENSMUSG00000026430	0.713463228742982	4.10192912549479	4.03316924347963	1.01704859822739	0.309130311066151	NA	0	0	4.28077937245789	0	0	0	Rassf5	Ras association (RalGDS/AF-6) domain family member 5 [Source:MGI Symbol;Acc:MGI:1926375]
ENSMUSG00000027869	0.713463228742982	4.10192912549479	4.03316924347963	1.01704859822739	0.309130311066151	NA	0	0	4.28077937245789	0	0	0	Hsd3b6	hydroxy-delta-5-steroid dehydrogenase, 3 beta- and steroid delta-isomerase 6 [Source:MGI Symbol;Acc:MGI:109598]
ENSMUSG00000030432	0.713463228742982	4.10192912549479	4.03316924347963	1.01704859822739	0.309130311066151	NA	0	0	4.28077937245789	0	0	0	Rpl28	ribosomal protein L28 [Source:MGI Symbol;Acc:MGI:101839]
ENSMUSG00000031445	0.713463228742982	4.10192912549479	4.03316924347963	1.01704859822739	0.309130311066151	NA	0	0	4.28077937245789	0	0	0	Proz	protein Z, vitamin K-dependent plasma glycoprotein [Source:MGI Symbol;Acc:MGI:1860488]
ENSMUSG00000031772	0.713463228742982	4.10192912549479	4.03316924347963	1.01704859822739	0.309130311066151	NA	0	0	4.28077937245789	0	0	0	Cntnap4	contactin associated protein-like 4 [Source:MGI Symbol;Acc:MGI:2183572]
ENSMUSG00000032454	0.713463228742982	4.10192912549479	4.03316924347963	1.01704859822739	0.309130311066151	NA	0	0	4.28077937245789	0	0	0	Rbp2	retinol binding protein 2, cellular [Source:MGI Symbol;Acc:MGI:97877]
ENSMUSG00000033149	0.713463228742982	4.10192912549479	4.03316924347963	1.01704859822739	0.309130311066151	NA	0	0	4.28077937245789	0	0	0	Phldb2	pleckstrin homology like domain, family B, member 2 [Source:MGI Symbol;Acc:MGI:2444981]
ENSMUSG00000034532	0.713463228742982	4.10192912549479	4.03316924347963	1.01704859822739	0.309130311066151	NA	0	0	4.28077937245789	0	0	0	Fbxo16	F-box protein 16 [Source:MGI Symbol;Acc:MGI:1354706]
ENSMUSG00000039372	0.713463228742982	4.10192912549479	4.03316924347963	1.01704859822739	0.309130311066151	NA	0	0	4.28077937245789	0	0	0	Marchf4	membrane associated ring-CH-type finger 4 [Source:MGI Symbol;Acc:MGI:2683550]
ENSMUSG00000039954	0.713463228742982	4.10192912549479	4.03316924347963	1.01704859822739	0.309130311066151	NA	0	0	4.28077937245789	0	0	0	Stk32a	serine/threonine kinase 32A [Source:MGI Symbol;Acc:MGI:2442403]
ENSMUSG00000040441	0.713463228742982	4.10192912549479	4.03316924347963	1.01704859822739	0.309130311066151	NA	0	0	4.28077937245789	0	0	0	Slc26a10	solute carrier family 26, member 10 [Source:MGI Symbol;Acc:MGI:2143920]
ENSMUSG00000040732	0.713463228742982	4.10192912549479	4.03316924347963	1.01704859822739	0.309130311066151	NA	0	0	4.28077937245789	0	0	0	Erg	ETS transcription factor [Source:MGI Symbol;Acc:MGI:95415]
ENSMUSG00000041216	0.713463228742982	4.10192912549479	4.03316924347963	1.01704859822739	0.309130311066151	NA	0	0	4.28077937245789	0	0	0	Clvs1	clavesin 1 [Source:MGI Symbol;Acc:MGI:1921688]
ENSMUSG00000043286	0.713463228742982	4.10192912549479	4.03316924347963	1.01704859822739	0.309130311066151	NA	0	0	4.28077937245789	0	0	0	Pnpla1	patatin-like phospholipase domain containing 1 [Source:MGI Symbol;Acc:MGI:3617850]
ENSMUSG00000045377	0.713463228742982	4.10192912549479	4.03316924347963	1.01704859822739	0.309130311066151	NA	0	0	4.28077937245789	0	0	0	Tmem88	transmembrane protein 88 [Source:MGI Symbol;Acc:MGI:1914270]
ENSMUSG00000045744	0.713463228742982	4.10192912549479	4.03316924347963	1.01704859822739	0.309130311066151	NA	0	0	4.28077937245789	0	0	0	Bricd5	BRICHOS domain containing 5 [Source:MGI Symbol;Acc:MGI:2441766]
ENSMUSG00000047635	0.713463228742982	4.10192912549479	4.03316924347963	1.01704859822739	0.309130311066151	NA	0	0	4.28077937245789	0	0	0	Mtrfr	mitochondrial translation release factor in rescue [Source:MGI Symbol;Acc:MGI:1919900]
ENSMUSG00000047730	0.713463228742982	4.10192912549479	4.03316924347963	1.01704859822739	0.309130311066151	NA	0	0	4.28077937245789	0	0	0	Fcgbp	Fc fragment of IgG binding protein [Source:MGI Symbol;Acc:MGI:2444336]
ENSMUSG00000049086	0.713463228742982	4.10192912549479	4.03316924347963	1.01704859822739	0.309130311066151	NA	0	0	4.28077937245789	0	0	0	Bmyc	brain expressed myelocytomatosis oncogene [Source:MGI Symbol;Acc:MGI:88184]
ENSMUSG00000050064	0.713463228742982	4.10192912549479	4.03316924347963	1.01704859822739	0.309130311066151	NA	0	0	4.28077937245789	0	0	0	Zfp697	zinc finger protein 697 [Source:MGI Symbol;Acc:MGI:2139736]
ENSMUSG00000051346	0.713463228742982	4.10192912549479	4.03316924347963	1.01704859822739	0.309130311066151	NA	0	0	4.28077937245789	0	0	0	Spryd4	SPRY domain containing 4 [Source:MGI Symbol;Acc:MGI:1913951]
ENSMUSG00000053166	0.713463228742982	4.10192912549479	4.03316924347963	1.01704859822739	0.309130311066151	NA	0	0	4.28077937245789	0	0	0	Cdh22	cadherin 22 [Source:MGI Symbol;Acc:MGI:1341843]
ENSMUSG00000054580	0.713463228742982	4.10192912549479	4.03316924347963	1.01704859822739	0.309130311066151	NA	0	0	4.28077937245789	0	0	0	Pla2r1	phospholipase A2 receptor 1 [Source:MGI Symbol;Acc:MGI:102468]
ENSMUSG00000056829	0.713463228742982	4.10192912549479	4.03316924347963	1.01704859822739	0.309130311066151	NA	0	0	4.28077937245789	0	0	0	Foxb2	forkhead box B2 [Source:MGI Symbol;Acc:MGI:1347468]
ENSMUSG00000058126	0.713463228742982	4.10192912549479	4.03316924347963	1.01704859822739	0.309130311066151	NA	0	0	4.28077937245789	0	0	0	Tpm3-rs7	tropomyosin 3, related sequence 7 [Source:MGI Symbol;Acc:MGI:99705]
ENSMUSG00000063239	0.713463228742982	4.10192912549479	4.03316924347963	1.01704859822739	0.309130311066151	NA	0	0	4.28077937245789	0	0	0	Grm4	glutamate receptor, metabotropic 4 [Source:MGI Symbol;Acc:MGI:1351341]
ENSMUSG00000068614	0.713463228742982	4.10192912549479	4.03316924347963	1.01704859822739	0.309130311066151	NA	0	0	4.28077937245789	0	0	0	Actc1	actin, alpha, cardiac muscle 1 [Source:MGI Symbol;Acc:MGI:87905]
ENSMUSG00000078496	0.713463228742982	4.10192912549479	4.03316924347963	1.01704859822739	0.309130311066151	NA	0	0	4.28077937245789	0	0	0	Zfp982	zinc finger protein 982 [Source:MGI Symbol;Acc:MGI:3701121]
ENSMUSG00000086056	0.713463228742982	4.10192912549479	4.03316924347963	1.01704859822739	0.309130311066151	NA	0	0	4.28077937245789	0	0	0	Gm4846	predicted gene 4846 [Source:MGI Symbol;Acc:MGI:3643319]
ENSMUSG00000089857	0.713463228742982	4.10192912549479	4.03316924347963	1.01704859822739	0.309130311066151	NA	0	0	4.28077937245789	0	0	0	Zfp882	zinc finger protein 882 [Source:MGI Symbol;Acc:MGI:3642748]
ENSMUSG00000089945	0.713463228742982	4.10192912549479	4.03316924347963	1.01704859822739	0.309130311066151	NA	0	0	4.28077937245789	0	0	0	Pakap	paralemmin A kinase anchor protein [Source:MGI Symbol;Acc:MGI:5141924]
ENSMUSG00000094649	0.713463228742982	4.10192912549479	4.03316924347963	1.01704859822739	0.309130311066151	NA	0	0	4.28077937245789	0	0	0	Mplkipl1	M-phase specific PLK1 intereacting protein like 1 [Source:MGI Symbol;Acc:MGI:3648735]
ENSMUSG00000101026	0.713463228742982	4.10192912549479	4.03316924347963	1.01704859822739	0.309130311066151	NA	0	0	4.28077937245789	0	0	0	Ly6g6g	lymphocyte antigen 6 family member G6G [Source:MGI Symbol;Acc:MGI:1925975]
ENSMUSG00000101381	0.713463228742982	4.10192912549479	4.03316924347963	1.01704859822739	0.309130311066151	NA	0	0	4.28077937245789	0	0	0	Btbd35f16	BTB domain containing 35, family member 16 [Source:MGI Symbol;Acc:MGI:3781877]
ENSMUSG00000103711	0.713463228742982	4.10192912549479	4.03316924347963	1.01704859822739	0.309130311066151	NA	0	0	4.28077937245789	0	0	0	Tstd1	thiosulfate sulfurtransferase (rhodanese)-like domain containing 1 [Source:MGI Symbol;Acc:MGI:3648482]
ENSMUSG00000038576	2.85184199171685	4.09846340797326	2.42197537150086	1.69219863100156	0.0906081074798003	0.176187153334315	0	11.8654952953913	4.28077937245789	0	0	0.964777282451911	Susd4	sushi domain containing 4 [Source:MGI Symbol;Acc:MGI:2138351]
ENSMUSG00000011877	2047.41317672035	4.09480496023626	0.0874442972005054	46.8275815728393	0	0	3724.19279095744	4121.28203259924	3758.52428901803	198.124108531603	227.654636648455	254.701202567305	Git1	GIT ArfGAP 1 [Source:MGI Symbol;Acc:MGI:1927140]
ENSMUSG00000029304	3.83500152545747	4.09374364560909	2.3553725615143	1.73804506025882	0.0822028742923509	0.163577143611835	0	21.7534080415507	0	1.2566011111941	0	0	Spp1	secreted phosphoprotein 1 [Source:MGI Symbol;Acc:MGI:98389]
ENSMUSG00000030206	2867.17441927189	4.08587824994723	0.0798144786463977	51.1921936876754	0	0	5195.07529753416	5357.27112586917	5695.57695505523	355.61811446793	325.99066312974	273.514359575117	Gsg1	germ cell associated 1 [Source:MGI Symbol;Acc:MGI:1194499]
ENSMUSG00000035864	1.43676540549185	4.08127353152875	3.49770831376843	1.16684216218464	0.243274116678902	NA	8.17156948098178	0	0	0	0.449022951969339	0	Syt1	synaptotagmin I [Source:MGI Symbol;Acc:MGI:99667]
ENSMUSG00000040711	1.43676540549185	4.08127353152875	3.49770831376843	1.16684216218464	0.243274116678902	NA	8.17156948098178	0	0	0	0.449022951969339	0	Sh3pxd2b	SH3 and PX domains 2B [Source:MGI Symbol;Acc:MGI:2442062]
ENSMUSG00000030600	1.43173941967441	4.08127139492835	3.50252789892744	1.16523594178311	0.243923500711899	NA	8.17156948098178	0	0	0.418867037064699	0	0	Lrfn1	leucine rich repeat and fibronectin type III domain containing 1 [Source:MGI Symbol;Acc:MGI:2136810]
ENSMUSG00000063439	1.43173941967441	4.08127139492835	3.50252789892744	1.16523594178311	0.243923500711899	NA	8.17156948098178	0	0	0.418867037064699	0	0	B9d2	B9 protein domain 2 [Source:MGI Symbol;Acc:MGI:2387643]
ENSMUSG00000050035	1024.19460656927	4.08098852844298	0.109579460948226	37.2422759988858	1.4130730149809e-303	1.95270989859083e-301	2112.35071083379	1841.12935333488	1849.29668890181	118.53937148931	123.032288839599	100.819226016225	Fhl4	four and a half LIM domains 4 [Source:MGI Symbol;Acc:MGI:1338765]
ENSMUSG00000054117	75.1622759479688	4.07962996637877	0.382497025325864	10.6657822055039	1.47155566722991e-26	2.06333008267626e-25	102.144618512272	203.691002570884	119.861822428821	8.37734074129399	6.28632132757075	10.612550106971	Zdhhc25	zinc finger, DHHC domain containing 25 [Source:MGI Symbol;Acc:MGI:1917323]
ENSMUSG00000069237	365.365880199841	4.07528884826462	0.177567693476329	22.9506210757189	1.45257955750199e-116	6.9751860836495e-115	778.341993063514	650.624658697289	639.976516182455	32.6716288910465	40.4120656772405	50.1684186874994	Fam8a1	family with sequence similarity 8, member A1 [Source:MGI Symbol;Acc:MGI:2145496]
ENSMUSG00000030556	455.610626392567	4.07234460297092	0.186826345926459	21.797485696016	2.45116574368937e-105	1.01617161180883e-103	817.156948098178	943.306875983608	819.769249825687	60.7357203743814	31.4316066378538	61.2633574356963	Lrrc28	leucine rich repeat containing 28 [Source:MGI Symbol;Acc:MGI:1915689]
ENSMUSG00000033124	578.188938457746	4.07165237428499	0.152771718764514	26.651872527278	1.70244635091865e-156	1.13226338322862e-154	1119.5050188945	1133.15480070987	1020.96588033121	53.6149807442815	57.4749378520754	84.4180122145422	Atg9a	autophagy related 9A [Source:MGI Symbol;Acc:MGI:2138446]
ENSMUSG00000044787	389.868437042178	4.07108992201947	0.18262830826373	22.2916696799298	4.45080459836626e-110	1.98403787777352e-108	708.883652475169	686.221144583463	813.348	51.9395125960227	49.3925247166273	29.4257071147833	Spata32	spermatogenesis associated 32 [Source:MGI Symbol;Acc:MGI:3045340]
ENSMUSG00000030815	1823.30186200846	4.06775795328013	0.101287041714897	40.1606946397947	0	0	3470.87413704701	3421.21781017116	3433.18505671123	250.901355201755	176.46602012395	187.166792795671	Phkg2	phosphorylase kinase, gamma 2 (testis) [Source:MGI Symbol;Acc:MGI:1916211]
ENSMUSG00000061742	13.0410283821233	4.06387289020106	0.999490965898015	4.06594259363793	4.78387114689521e-05	0.000198588135694044	42.9007397751543	13.8430778446232	17.1231174898316	2.9320692594529	0	1.44716592367787	Slc22a12	solute carrier family 22 (organic anion/cation transporter), member 12 [Source:MGI Symbol;Acc:MGI:1195269]
ENSMUSG00000061702	10.0858435021753	4.06121092489363	1.2261323170587	3.31221261228629	0.00092561171843469	0.00314553976357944	10.2144618512272	27.6861556892464	19.2635071760605	3.35093629651759	0	0	Tmem91	transmembrane protein 91 [Source:MGI Symbol;Acc:MGI:2443589]
ENSMUSG00000048696	1937.99399454806	4.06000727544937	0.191514578079357	21.1994685530782	9.65808615953939e-100	3.87476185697391e-98	3485.17438363873	3763.33959118827	3722.13766435214	278.12771261096	181.405272595613	197.779342902642	Mex3d	mex3 RNA binding family member D [Source:MGI Symbol;Acc:MGI:2681847]
ENSMUSG00000000439	43.9152020783152	4.05989055913236	1.27597911369457	3.18178449440056	0.00146370687614511	0.0047981345331093	63.3296634776088	63.2826415754202	122.00221211505	10.0528088895528	0	4.82388641225955	Mkrn2	makorin, ring finger protein, 2 [Source:MGI Symbol;Acc:MGI:1914277]
ENSMUSG00000045498	0.686328705910138	4.05292676020455	4.03746520569483	1.00382952018705	0.315460792860891	NA	0	1.97758254923188	2.14038968622895	0	0	0	Pcdhb3	protocadherin beta 3 [Source:MGI Symbol;Acc:MGI:2136737]
ENSMUSG00000121581	0.686328705910138	4.05292676020455	4.03746520569483	1.00382952018705	0.315460792860891	NA	0	1.97758254923188	2.14038968622895	0	0	0		novel protein
ENSMUSG00000043252	424.52745109693	4.05247972112632	0.148974708279605	27.2024679083134	6.07264396949499e-163	4.24300410385445e-161	813.071163357687	791.033019692753	798.365352963397	51.520645558958	44.4532722449646	48.7212527638215	Tmem64	transmembrane protein 64 [Source:MGI Symbol;Acc:MGI:2140359]
ENSMUSG00000043015	56.8103309044631	4.04632249579284	0.459542820110856	8.80510437485836	1.30730867629919e-18	1.37438698285148e-17	63.3296634776088	112.722205306217	145.546498663568	9.63394185248809	6.73534427954009	2.89433184735573	Nemp2	nuclear envelope integral membrane protein 2 [Source:MGI Symbol;Acc:MGI:2444113]
ENSMUSG00000049588	3.92627427409228	4.04511103465491	2.08657507758102	1.93863670572756	0.0525455907329743	0.113867938358951	14.3002465917181	7.91033019692753	0	0	1.34706885590802	0	Ccdc69	coiled-coil domain containing 69 [Source:MGI Symbol;Acc:MGI:1196234]
ENSMUSG00000095180	19.6374362704475	4.04401388596252	1.92482315381677	2.10097944735524	0.0356427704530094	0.082288683149077	28.6004931834362	37.5740684354058	44.9481834108079	6.70187259303519	0	0	Rhox5	reproductive homeobox 5 [Source:MGI Symbol;Acc:MGI:97538]
ENSMUSG00000009646	0.680964123415148	4.04333968018436	4.03832234072977	1.00124243164147	0.316709617208726	NA	4.08578474049089	0	0	0	0	0	Pla2g12b	phospholipase A2, group XIIB [Source:MGI Symbol;Acc:MGI:1917086]
ENSMUSG00000014301	0.680964123415148	4.04333968018436	4.03832234072977	1.00124243164147	0.316709617208726	NA	4.08578474049089	0	0	0	0	0	Pam16	presequence translocase-asssociated motor 16 [Source:MGI Symbol;Acc:MGI:1913699]
ENSMUSG00000015721	0.680964123415148	4.04333968018436	4.03832234072977	1.00124243164147	0.316709617208726	NA	4.08578474049089	0	0	0	0	0	Nlrp5	NLR family, pyrin domain containing 5 [Source:MGI Symbol;Acc:MGI:1345193]
ENSMUSG00000017747	0.680964123415148	4.04333968018436	4.03832234072977	1.00124243164147	0.316709617208726	NA	4.08578474049089	0	0	0	0	0	Ghdc	GH3 domain containing [Source:MGI Symbol;Acc:MGI:1931556]
ENSMUSG00000020388	0.680964123415148	4.04333968018436	4.03832234072977	1.00124243164147	0.316709617208726	NA	4.08578474049089	0	0	0	0	0	Pdlim4	PDZ and LIM domain 4 [Source:MGI Symbol;Acc:MGI:1353470]
ENSMUSG00000022061	0.680964123415148	4.04333968018436	4.03832234072977	1.00124243164147	0.316709617208726	NA	4.08578474049089	0	0	0	0	0	Nkx3-1	NK3 homeobox 1 [Source:MGI Symbol;Acc:MGI:97352]
ENSMUSG00000023348	0.680964123415148	4.04333968018436	4.03832234072977	1.00124243164147	0.316709617208726	NA	4.08578474049089	0	0	0	0	0	Trip6	thyroid hormone receptor interactor 6 [Source:MGI Symbol;Acc:MGI:1343458]
ENSMUSG00000025537	0.680964123415148	4.04333968018436	4.03832234072977	1.00124243164147	0.316709617208726	NA	4.08578474049089	0	0	0	0	0	Phkg1	phosphorylase kinase gamma 1 [Source:MGI Symbol;Acc:MGI:97579]
ENSMUSG00000026748	0.680964123415148	4.04333968018436	4.03832234072977	1.00124243164147	0.316709617208726	NA	4.08578474049089	0	0	0	0	0	Plxdc2	plexin domain containing 2 [Source:MGI Symbol;Acc:MGI:1914698]
ENSMUSG00000027274	0.680964123415148	4.04333968018436	4.03832234072977	1.00124243164147	0.316709617208726	NA	4.08578474049089	0	0	0	0	0	Mkks	McKusick-Kaufman syndrome [Source:MGI Symbol;Acc:MGI:1891836]
ENSMUSG00000027483	0.680964123415148	4.04333968018436	4.03832234072977	1.00124243164147	0.316709617208726	NA	4.08578474049089	0	0	0	0	0	Bpifa1	BPI fold containing family A, member 1 [Source:MGI Symbol;Acc:MGI:1338036]
ENSMUSG00000027983	0.680964123415148	4.04333968018436	4.03832234072977	1.00124243164147	0.316709617208726	NA	4.08578474049089	0	0	0	0	0	Cyp2u1	cytochrome P450, family 2, subfamily u, polypeptide 1 [Source:MGI Symbol;Acc:MGI:1918769]
ENSMUSG00000031840	0.680964123415148	4.04333968018436	4.03832234072977	1.00124243164147	0.316709617208726	NA	4.08578474049089	0	0	0	0	0	Rab3a	RAB3A, member RAS oncogene family [Source:MGI Symbol;Acc:MGI:97843]
ENSMUSG00000032184	0.680964123415148	4.04333968018436	4.03832234072977	1.00124243164147	0.316709617208726	NA	4.08578474049089	0	0	0	0	0	Lysmd2	LysM, putative peptidoglycan-binding, domain containing 2 [Source:MGI Symbol;Acc:MGI:1917332]
ENSMUSG00000032860	0.680964123415148	4.04333968018436	4.03832234072977	1.00124243164147	0.316709617208726	NA	4.08578474049089	0	0	0	0	0	P2ry2	purinergic receptor P2Y, G-protein coupled 2 [Source:MGI Symbol;Acc:MGI:105107]
ENSMUSG00000033768	0.680964123415148	4.04333968018436	4.03832234072977	1.00124243164147	0.316709617208726	NA	4.08578474049089	0	0	0	0	0	Nrxn2	neurexin II [Source:MGI Symbol;Acc:MGI:1096362]
ENSMUSG00000035189	0.680964123415148	4.04333968018436	4.03832234072977	1.00124243164147	0.316709617208726	NA	4.08578474049089	0	0	0	0	0	Ano4	anoctamin 4 [Source:MGI Symbol;Acc:MGI:2443344]
ENSMUSG00000040136	0.680964123415148	4.04333968018436	4.03832234072977	1.00124243164147	0.316709617208726	NA	4.08578474049089	0	0	0	0	0	Abcc8	ATP-binding cassette, sub-family C member 8 [Source:MGI Symbol;Acc:MGI:1352629]
ENSMUSG00000040429	0.680964123415148	4.04333968018436	4.03832234072977	1.00124243164147	0.316709617208726	NA	4.08578474049089	0	0	0	0	0	Mterf1a	mitochondrial transcription termination factor 1a [Source:MGI Symbol;Acc:MGI:1918240]
ENSMUSG00000040511	0.680964123415148	4.04333968018436	4.03832234072977	1.00124243164147	0.316709617208726	NA	4.08578474049089	0	0	0	0	0	Pvr	poliovirus receptor [Source:MGI Symbol;Acc:MGI:107741]
ENSMUSG00000041607	0.680964123415148	4.04333968018436	4.03832234072977	1.00124243164147	0.316709617208726	NA	4.08578474049089	0	0	0	0	0	Mbp	myelin basic protein [Source:MGI Symbol;Acc:MGI:96925]
ENSMUSG00000043719	0.680964123415148	4.04333968018436	4.03832234072977	1.00124243164147	0.316709617208726	NA	4.08578474049089	0	0	0	0	0	Col6a6	collagen, type VI, alpha 6 [Source:MGI Symbol;Acc:MGI:2444259]
ENSMUSG00000044528	0.680964123415148	4.04333968018436	4.03832234072977	1.00124243164147	0.316709617208726	NA	4.08578474049089	0	0	0	0	0	Tram1l1	translocation associated membrane protein 1-like 1 [Source:MGI Symbol;Acc:MGI:2443503]
ENSMUSG00000046152	0.680964123415148	4.04333968018436	4.03832234072977	1.00124243164147	0.316709617208726	NA	4.08578474049089	0	0	0	0	0	Fut10	fucosyltransferase 10 [Source:MGI Symbol;Acc:MGI:2384748]
ENSMUSG00000048101	0.680964123415148	4.04333968018436	4.03832234072977	1.00124243164147	0.316709617208726	NA	4.08578474049089	0	0	0	0	0	Or7a40	olfactory receptor family 7 subfamily A member 40 [Source:MGI Symbol;Acc:MGI:109316]
ENSMUSG00000048915	0.680964123415148	4.04333968018436	4.03832234072977	1.00124243164147	0.316709617208726	NA	4.08578474049089	0	0	0	0	0	Efna5	ephrin A5 [Source:MGI Symbol;Acc:MGI:107444]
ENSMUSG00000054146	0.680964123415148	4.04333968018436	4.03832234072977	1.00124243164147	0.316709617208726	NA	4.08578474049089	0	0	0	0	0	Krt15	keratin 15 [Source:MGI Symbol;Acc:MGI:96689]
ENSMUSG00000055320	0.680964123415148	4.04333968018436	4.03832234072977	1.00124243164147	0.316709617208726	NA	4.08578474049089	0	0	0	0	0	Tead1	TEA domain family member 1 [Source:MGI Symbol;Acc:MGI:101876]
ENSMUSG00000058216	0.680964123415148	4.04333968018436	4.03832234072977	1.00124243164147	0.316709617208726	NA	4.08578474049089	0	0	0	0	0	Gstp3	glutathione S-transferase pi 3 [Source:MGI Symbol;Acc:MGI:2385078]
ENSMUSG00000062310	0.680964123415148	4.04333968018436	4.03832234072977	1.00124243164147	0.316709617208726	NA	4.08578474049089	0	0	0	0	0	Glrp1	glutamine repeat protein 1 [Source:MGI Symbol;Acc:MGI:108038]
ENSMUSG00000063507	0.680964123415148	4.04333968018436	4.03832234072977	1.00124243164147	0.316709617208726	NA	4.08578474049089	0	0	0	0	0	Gm1330	predicted gene 1330 [Source:MGI Symbol;Acc:MGI:2686176]
ENSMUSG00000069372	0.680964123415148	4.04333968018436	4.03832234072977	1.00124243164147	0.316709617208726	NA	4.08578474049089	0	0	0	0	0	Ctxn3	cortexin 3 [Source:MGI Symbol;Acc:MGI:3642816]
ENSMUSG00000069922	0.680964123415148	4.04333968018436	4.03832234072977	1.00124243164147	0.316709617208726	NA	4.08578474049089	0	0	0	0	0	Ces3a	carboxylesterase 3A [Source:MGI Symbol;Acc:MGI:102773]
ENSMUSG00000074037	0.680964123415148	4.04333968018436	4.03832234072977	1.00124243164147	0.316709617208726	NA	4.08578474049089	0	0	0	0	0	Mc1r	melanocortin 1 receptor [Source:MGI Symbol;Acc:MGI:99456]
ENSMUSG00000079262	0.680964123415148	4.04333968018436	4.03832234072977	1.00124243164147	0.316709617208726	NA	4.08578474049089	0	0	0	0	0	Slco1a6	solute carrier organic anion transporter family, member 1a6 [Source:MGI Symbol;Acc:MGI:1351906]
ENSMUSG00000090394	0.680964123415148	4.04333968018436	4.03832234072977	1.00124243164147	0.316709617208726	NA	4.08578474049089	0	0	0	0	0	4930523C07Rik	RIKEN cDNA 4930523C07 gene [Source:MGI Symbol;Acc:MGI:1914897]
ENSMUSG00000091996	0.680964123415148	4.04333968018436	4.03832234072977	1.00124243164147	0.316709617208726	NA	4.08578474049089	0	0	0	0	0	Smim35	small integral membrane protein 35 [Source:MGI Symbol;Acc:MGI:3040681]
ENSMUSG00000094134	0.680964123415148	4.04333968018436	4.03832234072977	1.00124243164147	0.316709617208726	NA	4.08578474049089	0	0	0	0	0	Ighv5-15	immunoglobulin heavy variable 5-15 [Source:MGI Symbol;Acc:MGI:4439812]
ENSMUSG00000096445	0.680964123415148	4.04333968018436	4.03832234072977	1.00124243164147	0.316709617208726	NA	4.08578474049089	0	0	0	0	0	Dcpp1	demilune cell and parotid protein 1 [Source:MGI Symbol;Acc:MGI:105949]
ENSMUSG00000050002	4.16524207869938	4.04327796007141	2.28929670683018	1.76616597927572	0.0773680068300321	0.155723017945025	0	0	23.5442865485184	0	0	1.44716592367787	Idnk	idnK gluconokinase homolog (E. coli) [Source:MGI Symbol;Acc:MGI:1922981]
ENSMUSG00000035561	14.3606202295447	4.03966225854319	2.04562018110474	1.97478607996601	0.0482924293861466	0.106040420952596	51.0723092561361	23.7309905907826	6.42116905868684	0	4.93925247166273	0	Aldh1b1	aldehyde dehydrogenase 1 family, member B1 [Source:MGI Symbol;Acc:MGI:1919785]
ENSMUSG00000040569	9.1383061362619	4.03765697279956	1.33410337722154	3.02649482921523	0.00247407052528582	0.00779579810564471	4.08578474049089	19.7758254923188	27.8250659209763	0	3.14316066378538	0	Slc26a7	solute carrier family 26, member 7 [Source:MGI Symbol;Acc:MGI:2384791]
ENSMUSG00000044433	127.664482533692	4.03764404716728	0.267882243898779	15.0724586609515	2.45793066555208e-51	5.72458496020059e-50	212.460806505526	284.771887089391	224.740917054039	14.2414792601998	14.8177574149882	14.9540478780046	Camsap3	calmodulin regulated spectrin-associated protein family, member 3 [Source:MGI Symbol;Acc:MGI:1916947]
ENSMUSG00000045817	2.61429651259572	4.03643354479076	2.50723212353369	1.6099161728599	0.107416157794897	0.201894325902242	4.08578474049089	0	10.7019484311447	0	0.898045903938679	0	Zfp36l2	zinc finger protein 36, C3H type-like 2 [Source:MGI Symbol;Acc:MGI:107945]
ENSMUSG00000031430	288.567085009047	4.02651755133808	0.432687748835596	9.30582749840693	1.32952962720291e-20	1.53105184940024e-19	504.594415450625	589.319599671101	537.237811243466	30.1584266686584	17.5118951268042	52.5803618936291	Vsig1	V-set and immunoglobulin domain containing 1 [Source:MGI Symbol;Acc:MGI:1926039]
ENSMUSG00000024388	9.51771483543553	4.02215408927268	1.29434958744409	3.10747121820087	0.00188695358554921	0.00607665503456126	6.12867711073633	19.7758254923188	27.8250659209763	0	0	3.37672048858169	Myo7b	myosin VIIB [Source:MGI Symbol;Acc:MGI:107709]
ENSMUSG00000038057	6062.80450631665	4.01471897292659	0.0600565793598618	66.8489450401463	0	0	12128.6520021472	10949.8745750969	11177.1149414876	639.609965597796	718.436723150943	763.138830419462	Dbil5	diazepam binding inhibitor-like 5 [Source:MGI Symbol;Acc:MGI:108039]
ENSMUSG00000121583	68.8329907977421	4.01066848945269	0.420383770764098	9.5404931597688	1.42154691088871e-21	1.68861307838805e-20	89.8872642907995	140.408360995464	158.388836780942	6.28300555597049	4.04120656772405	13.9892705955527	Zftraf1	zinc finger TRAF type containing 1 [Source:NCBI gene (formerly Entrezgene);Acc:54151]
ENSMUSG00000050087	43.8398736278494	4.00596514872643	2.29992884308763	1.74177786446144	0.0815473214570203	0.162405966680386	132.788004065954	61.3050590261884	53.5097421557237	0	0	15.4364365192306	Cby3	chibby family member 3 [Source:MGI Symbol;Acc:MGI:1923903]
ENSMUSG00000031618	4.03524565738804	4.00289016444165	2.07874632882253	1.92562705171873	0.0541509584235282	0.116639326275272	16.3431389619636	0	6.42116905868684	0	0	1.44716592367787	Nr3c2	nuclear receptor subfamily 3, group C, member 2 [Source:MGI Symbol;Acc:MGI:99459]
ENSMUSG00000000791	0.659194183077294	4.00266315988459	4.04202095614942	0.990262842105024	0.322045663588237	NA	0	3.95516509846377	0	0	0	0	Il12rb1	interleukin 12 receptor, beta 1 [Source:MGI Symbol;Acc:MGI:104579]
ENSMUSG00000001761	0.659194183077294	4.00266315988459	4.04202095614942	0.990262842105024	0.322045663588237	NA	0	3.95516509846377	0	0	0	0	Smo	smoothened, frizzled class receptor [Source:MGI Symbol;Acc:MGI:108075]
ENSMUSG00000003812	0.659194183077294	4.00266315988459	4.04202095614942	0.990262842105024	0.322045663588237	NA	0	3.95516509846377	0	0	0	0	Dnase2a	deoxyribonuclease II alpha [Source:MGI Symbol;Acc:MGI:1329019]
ENSMUSG00000006270	0.659194183077294	4.00266315988459	4.04202095614942	0.990262842105024	0.322045663588237	NA	0	3.95516509846377	0	0	0	0	Vax1	ventral anterior homeobox 1 [Source:MGI Symbol;Acc:MGI:1277163]
ENSMUSG00000009378	0.659194183077294	4.00266315988459	4.04202095614942	0.990262842105024	0.322045663588237	NA	0	3.95516509846377	0	0	0	0	Slc16a12	solute carrier family 16 (monocarboxylic acid transporters), member 12 [Source:MGI Symbol;Acc:MGI:2147716]
ENSMUSG00000016028	0.659194183077294	4.00266315988459	4.04202095614942	0.990262842105024	0.322045663588237	NA	0	3.95516509846377	0	0	0	0	Celsr1	cadherin, EGF LAG seven-pass G-type receptor 1 [Source:MGI Symbol;Acc:MGI:1100883]
ENSMUSG00000019851	0.659194183077294	4.00266315988459	4.04202095614942	0.990262842105024	0.322045663588237	NA	0	3.95516509846377	0	0	0	0	Perp	PERP, TP53 apoptosis effector [Source:MGI Symbol;Acc:MGI:1929938]
ENSMUSG00000022296	0.659194183077294	4.00266315988459	4.04202095614942	0.990262842105024	0.322045663588237	NA	0	3.95516509846377	0	0	0	0	Baalc	brain and acute leukemia, cytoplasmic [Source:MGI Symbol;Acc:MGI:1928704]
ENSMUSG00000022323	0.659194183077294	4.00266315988459	4.04202095614942	0.990262842105024	0.322045663588237	NA	0	3.95516509846377	0	0	0	0	Rida	reactive intermediate imine deaminase A homolog [Source:MGI Symbol;Acc:MGI:1095401]
ENSMUSG00000022885	0.659194183077294	4.00266315988459	4.04202095614942	0.990262842105024	0.322045663588237	NA	0	3.95516509846377	0	0	0	0	St6gal1	beta galactoside alpha 2,6 sialyltransferase 1 [Source:MGI Symbol;Acc:MGI:108470]
ENSMUSG00000024736	0.659194183077294	4.00266315988459	4.04202095614942	0.990262842105024	0.322045663588237	NA	0	3.95516509846377	0	0	0	0	Tmem132a	transmembrane protein 132A [Source:MGI Symbol;Acc:MGI:2147810]
ENSMUSG00000026077	0.659194183077294	4.00266315988459	4.04202095614942	0.990262842105024	0.322045663588237	NA	0	3.95516509846377	0	0	0	0	Npas2	neuronal PAS domain protein 2 [Source:MGI Symbol;Acc:MGI:109232]
ENSMUSG00000027457	0.659194183077294	4.00266315988459	4.04202095614942	0.990262842105024	0.322045663588237	NA	0	3.95516509846377	0	0	0	0	Snph	syntaphilin [Source:MGI Symbol;Acc:MGI:2139270]
ENSMUSG00000027894	0.659194183077294	4.00266315988459	4.04202095614942	0.990262842105024	0.322045663588237	NA	0	3.95516509846377	0	0	0	0	Slc6a17	solute carrier family 6 (neurotransmitter transporter), member 17 [Source:MGI Symbol;Acc:MGI:2442535]
ENSMUSG00000029544	0.659194183077294	4.00266315988459	4.04202095614942	0.990262842105024	0.322045663588237	NA	0	3.95516509846377	0	0	0	0	Cabp1	calcium binding protein 1 [Source:MGI Symbol;Acc:MGI:1352750]
ENSMUSG00000031374	0.659194183077294	4.00266315988459	4.04202095614942	0.990262842105024	0.322045663588237	NA	0	3.95516509846377	0	0	0	0	Zfp92	zinc finger protein 92 [Source:MGI Symbol;Acc:MGI:108094]
ENSMUSG00000031950	0.659194183077294	4.00266315988459	4.04202095614942	0.990262842105024	0.322045663588237	NA	0	3.95516509846377	0	0	0	0	Gabarapl2	GABA type A receptor associated protein like 2 [Source:MGI Symbol;Acc:MGI:1890602]
ENSMUSG00000033022	0.659194183077294	4.00266315988459	4.04202095614942	0.990262842105024	0.322045663588237	NA	0	3.95516509846377	0	0	0	0	Cdo1	cysteine dioxygenase 1, cytosolic [Source:MGI Symbol;Acc:MGI:105925]
ENSMUSG00000035208	0.659194183077294	4.00266315988459	4.04202095614942	0.990262842105024	0.322045663588237	NA	0	3.95516509846377	0	0	0	0	Slfn8	schlafen 8 [Source:MGI Symbol;Acc:MGI:2672859]
ENSMUSG00000035638	0.659194183077294	4.00266315988459	4.04202095614942	0.990262842105024	0.322045663588237	NA	0	3.95516509846377	0	0	0	0	Muc20	mucin 20 [Source:MGI Symbol;Acc:MGI:2385039]
ENSMUSG00000037410	0.659194183077294	4.00266315988459	4.04202095614942	0.990262842105024	0.322045663588237	NA	0	3.95516509846377	0	0	0	0	Tbc1d2b	TBC1 domain family, member 2B [Source:MGI Symbol;Acc:MGI:1914266]
ENSMUSG00000037469	0.659194183077294	4.00266315988459	4.04202095614942	0.990262842105024	0.322045663588237	NA	0	3.95516509846377	0	0	0	0	Acp7	acid phosphatase 7, tartrate resistant [Source:MGI Symbol;Acc:MGI:2142121]
ENSMUSG00000038147	0.659194183077294	4.00266315988459	4.04202095614942	0.990262842105024	0.322045663588237	NA	0	3.95516509846377	0	0	0	0	Cd84	CD84 antigen [Source:MGI Symbol;Acc:MGI:1336885]
ENSMUSG00000040616	0.659194183077294	4.00266315988459	4.04202095614942	0.990262842105024	0.322045663588237	NA	0	3.95516509846377	0	0	0	0	Tmem51	transmembrane protein 51 [Source:MGI Symbol;Acc:MGI:2384874]
ENSMUSG00000040809	0.659194183077294	4.00266315988459	4.04202095614942	0.990262842105024	0.322045663588237	NA	0	3.95516509846377	0	0	0	0	Chil3	chitinase-like 3 [Source:MGI Symbol;Acc:MGI:1330860]
ENSMUSG00000042345	0.659194183077294	4.00266315988459	4.04202095614942	0.990262842105024	0.322045663588237	NA	0	3.95516509846377	0	0	0	0	Ubash3a	ubiquitin associated and SH3 domain containing, A [Source:MGI Symbol;Acc:MGI:1926074]
ENSMUSG00000045094	0.659194183077294	4.00266315988459	4.04202095614942	0.990262842105024	0.322045663588237	NA	0	3.95516509846377	0	0	0	0	Arhgef37	Rho guanine nucleotide exchange factor 37 [Source:MGI Symbol;Acc:MGI:3045339]
ENSMUSG00000046748	0.659194183077294	4.00266315988459	4.04202095614942	0.990262842105024	0.322045663588237	NA	0	3.95516509846377	0	0	0	0	Tmem45a2	transmembrane protein 45A2 [Source:MGI Symbol;Acc:MGI:1916707]
ENSMUSG00000047517	0.659194183077294	4.00266315988459	4.04202095614942	0.990262842105024	0.322045663588237	NA	0	3.95516509846377	0	0	0	0	Dmbt1	deleted in malignant brain tumors 1 [Source:MGI Symbol;Acc:MGI:106210]
ENSMUSG00000047786	0.659194183077294	4.00266315988459	4.04202095614942	0.990262842105024	0.322045663588237	NA	0	3.95516509846377	0	0	0	0	Lix1	limb and CNS expressed 1 [Source:MGI Symbol;Acc:MGI:1913893]
ENSMUSG00000049583	0.659194183077294	4.00266315988459	4.04202095614942	0.990262842105024	0.322045663588237	NA	0	3.95516509846377	0	0	0	0	Grm5	glutamate receptor, metabotropic 5 [Source:MGI Symbol;Acc:MGI:1351342]
ENSMUSG00000050332	0.659194183077294	4.00266315988459	4.04202095614942	0.990262842105024	0.322045663588237	NA	0	3.95516509846377	0	0	0	0	Amer1	APC membrane recruitment 1 [Source:MGI Symbol;Acc:MGI:1919595]
ENSMUSG00000051098	0.659194183077294	4.00266315988459	4.04202095614942	0.990262842105024	0.322045663588237	NA	0	3.95516509846377	0	0	0	0	Mblac2	metallo-beta-lactamase domain containing 2 [Source:MGI Symbol;Acc:MGI:1920102]
ENSMUSG00000053338	0.659194183077294	4.00266315988459	4.04202095614942	0.990262842105024	0.322045663588237	NA	0	3.95516509846377	0	0	0	0	Tarm1	T cell-interacting, activating receptor on myeloid cells 1 [Source:MGI Symbol;Acc:MGI:2442280]
ENSMUSG00000056553	0.659194183077294	4.00266315988459	4.04202095614942	0.990262842105024	0.322045663588237	NA	0	3.95516509846377	0	0	0	0	Ptprn2	protein tyrosine phosphatase receptor type N polypeptide 2 [Source:MGI Symbol;Acc:MGI:107418]
ENSMUSG00000059481	0.659194183077294	4.00266315988459	4.04202095614942	0.990262842105024	0.322045663588237	NA	0	3.95516509846377	0	0	0	0	Plg	plasminogen [Source:MGI Symbol;Acc:MGI:97620]
ENSMUSG00000059900	0.659194183077294	4.00266315988459	4.04202095614942	0.990262842105024	0.322045663588237	NA	0	3.95516509846377	0	0	0	0	Tmem40	transmembrane protein 40 [Source:MGI Symbol;Acc:MGI:2137870]
ENSMUSG00000063529	0.659194183077294	4.00266315988459	4.04202095614942	0.990262842105024	0.322045663588237	NA	0	3.95516509846377	0	0	0	0	Stmnd1	stathmin domain containing 1 [Source:MGI Symbol;Acc:MGI:2686420]
ENSMUSG00000066090	0.659194183077294	4.00266315988459	4.04202095614942	0.990262842105024	0.322045663588237	NA	0	3.95516509846377	0	0	0	0	Insl5	insulin-like 5 [Source:MGI Symbol;Acc:MGI:1346085]
ENSMUSG00000071392	0.659194183077294	4.00266315988459	4.04202095614942	0.990262842105024	0.322045663588237	NA	0	3.95516509846377	0	0	0	0	Ect2l	epithelial cell transforming sequence 2 oncogene-like [Source:MGI Symbol;Acc:MGI:3641723]
ENSMUSG00000071711	0.659194183077294	4.00266315988459	4.04202095614942	0.990262842105024	0.322045663588237	NA	0	3.95516509846377	0	0	0	0	Mpst	mercaptopyruvate sulfurtransferase [Source:MGI Symbol;Acc:MGI:2179733]
ENSMUSG00000073565	0.659194183077294	4.00266315988459	4.04202095614942	0.990262842105024	0.322045663588237	NA	0	3.95516509846377	0	0	0	0	Prr16	proline rich 16 [Source:MGI Symbol;Acc:MGI:1918623]
ENSMUSG00000075269	0.659194183077294	4.00266315988459	4.04202095614942	0.990262842105024	0.322045663588237	NA	0	3.95516509846377	0	0	0	0	Bex6	brain expressed family member 6 [Source:MGI Symbol;Acc:MGI:3588247]
ENSMUSG00000076498	0.659194183077294	4.00266315988459	4.04202095614942	0.990262842105024	0.322045663588237	NA	0	3.95516509846377	0	0	0	0	Trbc2	T cell receptor beta, constant 2 [Source:MGI Symbol;Acc:MGI:4835227]
ENSMUSG00000090336	0.659194183077294	4.00266315988459	4.04202095614942	0.990262842105024	0.322045663588237	NA	0	3.95516509846377	0	0	0	0	Cfap97d2	CFAP97 domain containing 2 [Source:MGI Symbol;Acc:MGI:2685952]
ENSMUSG00000096687	0.659194183077294	4.00266315988459	4.04202095614942	0.990262842105024	0.322045663588237	NA	0	3.95516509846377	0	0	0	0	Mfsd4b4	major facilitator superfamily domain containing 4B4 [Source:MGI Symbol;Acc:MGI:3035041]
ENSMUSG00000097221	0.659194183077294	4.00266315988459	4.04202095614942	0.990262842105024	0.322045663588237	NA	0	3.95516509846377	0	0	0	0	1810049J17Rik	RIKEN cDNA 1810049J17 gene [Source:MGI Symbol;Acc:MGI:3704453]
ENSMUSG00000098004	0.659194183077294	4.00266315988459	4.04202095614942	0.990262842105024	0.322045663588237	NA	0	3.95516509846377	0	0	0	0	Gm27027	predicted gene, 27027 [Source:MGI Symbol;Acc:MGI:5504142]
ENSMUSG00000009418	5.2402498840023	3.9989621700174	1.7400930705401	2.29813119638261	0.0215543231883398	0.0534751880098508	8.17156948098178	0	21.4038968622895	0.418867037064699	0	1.44716592367787	Nav1	neuron navigator 1 [Source:MGI Symbol;Acc:MGI:2183683]
ENSMUSG00000040562	21.0431823548547	3.99424260143556	0.818048501233717	4.88264766136941	1.04670802634226e-06	5.24492656068439e-06	22.4718160726999	53.3947288292608	42.8077937245789	0	1.79609180787736	5.78866369471147	Gstm2	glutathione S-transferase, mu 2 [Source:MGI Symbol;Acc:MGI:95861]
ENSMUSG00000029860	36.3573949920096	3.9890321050307	0.628070374739515	6.35125021887095	2.13571983004009e-10	1.43655746491123e-09	34.7291702941726	88.9912147154347	81.3348	2.0943351853235	1.34706885590802	9.64777282451911	Zyx	zyxin [Source:MGI Symbol;Acc:MGI:103072]
ENSMUSG00000030737	7.96179741826576	3.98821909537597	1.36925738369462	2.91268766768648	0.00358332810480815	0.0109016271133804	22.4718160726999	13.8430778446232	8.56155874491579	0	0	2.89433184735573	Slco2b1	solute carrier organic anion transporter family, member 2b1 [Source:MGI Symbol;Acc:MGI:1351872]
ENSMUSG00000023930	2569.31567296373	3.98652062426539	0.0695763919638762	57.2970300951388	0	0	4976.4858139179	4924.18054758739	4599.69743570601	287.761654463448	315.663135234446	312.105450873193	Crisp2	cysteine-rich secretory protein 2 [Source:MGI Symbol;Acc:MGI:98815]
ENSMUSG00000027199	73.0959870621572	3.97905098648676	1.45549433516563	2.73381413472417	0.00626053729868516	0.0179323589092002	145.045358287427	132.498030798536	134.844550232424	5.44527148184109	0	20.7427115727161	Gatm	glycine amidinotransferase (L-arginine:glycine amidinotransferase) [Source:MGI Symbol;Acc:MGI:1914342]
ENSMUSG00000029426	7.90752837260008	3.97719837190769	1.40845272710769	2.82380678837195	0.00474569836750375	0.0140095539037845	22.4718160726999	17.7982429430869	4.28077937245789	0	0	2.89433184735573	Scarb2	scavenger receptor class B, member 2 [Source:MGI Symbol;Acc:MGI:1196458]
ENSMUSG00000046056	2.65791751434242	3.9767790308587	2.73943003138074	1.45168118378782	0.14659027358127	0.258565201039606	0	0	14.9827278036026	0	0	0.964777282451911	Sbsn	suprabasin [Source:MGI Symbol;Acc:MGI:2446326]
ENSMUSG00000027227	872.66415463715	3.97549589892919	0.263968593515141	15.0604882421407	2.9460328143987e-51	6.84856263788348e-50	1620.01364960464	1655.23659370709	1648.10005839629	125.66011111941	119.440105223844	67.5344097716338	Sord	sorbitol dehydrogenase [Source:MGI Symbol;Acc:MGI:98266]
ENSMUSG00000089736	6.33097227957714	3.97170907223366	1.48306676824024	2.67803793955032	0.00740548295553212	0.0208140093825882	14.3002465917181	0	21.4038968622895	0.418867037064699	0.898045903938679	0.964777282451911	Tgfbr3l	transforming growth factor, beta receptor III-like [Source:MGI Symbol;Acc:MGI:3833469]
ENSMUSG00000029320	241.676926616338	3.97043652460936	0.209863173342831	18.9191674812011	7.9297132981482e-80	2.62292139066673e-78	498.465738339888	389.583762198681	475.166510342826	26.3886233350761	36.8198820614858	23.6370434200718	1700016H13Rik	RIKEN cDNA 1700016H13 gene [Source:MGI Symbol;Acc:MGI:1921468]
ENSMUSG00000040260	63.4478167786319	3.96925086760408	0.377706764075805	10.5088159522806	7.86750889766321e-26	1.09205589464551e-24	110.316187993254	112.722205306217	134.844550232424	9.21507481542339	5.38827542363207	8.20060690084124	Daam2	dishevelled associated activator of morphogenesis 2 [Source:MGI Symbol;Acc:MGI:1923691]
ENSMUSG00000032818	9.19379393674976	3.9687381131082	1.29336218496421	3.06854349017326	0.00215105016495973	0.00684910673364163	22.4718160726999	7.91033019692753	21.4038968622895	0	0	3.37672048858169	Loxhd1	lipoxygenase homology domains 1 [Source:MGI Symbol;Acc:MGI:1914609]
ENSMUSG00000035203	201.344715001055	3.96150559516315	0.264187460305087	14.9950553693515	7.90967062419484e-51	1.80500134959837e-49	373.849303754916	344.099363566348	417.375988814645	33.0904959281112	11.6745967512028	27.9785411911054	Epn1	epsin 1 [Source:MGI Symbol;Acc:MGI:1333763]
ENSMUSG00000007097	39.1585489631319	3.95837077120089	0.576897265979258	6.86148297909114	6.81493256068407e-12	5.07225112251513e-11	42.9007397751543	77.1257194200434	100.598315252761	0.837734074129399	6.73534427954009	6.75344097716338	Atp1a2	ATPase, Na+/K+ transporting, alpha 2 polypeptide [Source:MGI Symbol;Acc:MGI:88106]
ENSMUSG00000034765	19.4495407731922	3.95661254404177	0.754463895562506	5.24427022593552	1.56902101925379e-07	8.41117000709457e-07	34.7291702941726	51.4171462800289	23.5442865485184	2.9320692594529	3.59218361575472	0.482388641225955	Dusp5	dual specificity phosphatase 5 [Source:MGI Symbol;Acc:MGI:2685183]
ENSMUSG00000039533	6.49785692940557	3.95569915310165	1.52884979180561	2.58736938991886	0.00967118525389175	0.0263195910290266	20.4289237024544	11.8654952953913	4.28077937245789	0	0	2.41194320612978	Mmd2	monocyte to macrophage differentiation-associated 2 [Source:MGI Symbol;Acc:MGI:1922354]
ENSMUSG00000015090	45.2546340638904	3.94725637887289	0.456872140447012	8.6397397202001	5.63412290488118e-18	5.73417238690731e-17	63.3296634776088	88.9912147154347	102.738704938989	7.12073963009989	4.04120656772405	5.30627505348551	Ptgds	prostaglandin D2 synthase (brain) [Source:MGI Symbol;Acc:MGI:99261]
ENSMUSG00000029346	58.6481478003869	3.94704499794934	0.436253738929069	9.04759007370043	1.46158306198221e-19	1.60722445109396e-18	118.487757474236	79.1033019692753	132.704160546195	2.9320692594529	8.53143608741745	10.1301614657451	Srrd	SRR1 domain containing [Source:MGI Symbol;Acc:MGI:1917368]
ENSMUSG00000038298	716.476918168597	3.94596183818696	0.145718316280726	27.0793812260709	1.72259717040698e-161	1.17070715892632e-159	1307.45111695708	1334.86822073152	1395.53407542127	109.324296673887	88.0084985859905	63.6753006418261	Pdzk1	PDZ domain containing 1 [Source:MGI Symbol;Acc:MGI:1928901]
ENSMUSG00000016458	33.8804489655226	3.94445169215722	0.635441756148667	6.20741657908043	5.38626836011706e-10	3.52203047291145e-09	61.2867711073633	65.2602241246521	64.2116905868684	0	6.73534427954009	5.78866369471147	Wt1	WT1 transcription factor [Source:MGI Symbol;Acc:MGI:98968]
ENSMUSG00000061983	11.544165824376	3.93017731249233	1.16820622013188	3.36428384369384	0.00076742572508326	0.00265050645455721	30.6433855536817	23.7309905907826	10.7019484311447	4.18867037064699	0	0	Rps12	ribosomal protein S12 [Source:MGI Symbol;Acc:MGI:98105]
ENSMUSG00000024053	142.132723994836	3.92760742263872	0.314306462560761	12.4961077498667	7.83966240127374e-36	1.34671106746742e-34	308.476747907062	217.534080415507	273.969879837305	16.754681482588	8.08241313544811	27.9785411911054	Emilin2	elastin microfibril interfacer 2 [Source:MGI Symbol;Acc:MGI:2389136]
ENSMUSG00000007029	3318.92858940107	3.92543431358759	0.0732939022419544	53.5574473934971	0	0	6273.72246902376	6296.62283675431	6112.95294386987	365.252056320418	466.085824144174	398.935406293865	Vars1	valyl-tRNA synthetase 1 [Source:MGI Symbol;Acc:MGI:90675]
ENSMUSG00000025025	148.43146028441	3.92381536895994	0.66444469582431	5.90540551172894	3.51780365161349e-09	2.16160691774293e-08	281.919147093871	296.637382384782	256.846762347474	10.8905429636822	7.63339018347877	36.6615367331726	Mxi1	MAX interactor 1, dimerization protein [Source:MGI Symbol;Acc:MGI:97245]
ENSMUSG00000050666	2.54937942301105	3.9224053977344	2.51363032391438	1.56045	0.118652547400499	0.218199280204053	0	7.91033019692753	6.42116905868684	0	0	0.964777282451911	Vstm4	V-set and transmembrane domain containing 4 [Source:MGI Symbol;Acc:MGI:2444633]
ENSMUSG00000018428	4595.02487254603	3.92052140641972	0.0549149467195683	71.3926105845185	0	0	8424.88813489221	9104.79005666359	8332.53704848929	580.130846334609	558.584552249858	569.218596646627	Akap1	A kinase anchor protein 1 [Source:MGI Symbol;Acc:MGI:104729]
ENSMUSG00000046417	2.54417	3.9145924825843	2.78281480962504	1.40670247586894	0.159515631282015	0.276501171603404	14.3002465917181	0	0	0	0	0.964777282451911	Lrrc75a	leucine rich repeat containing 75A [Source:MGI Symbol;Acc:MGI:2682293]
ENSMUSG00000029073	83.2131784881991	3.91442821013627	1.21770565888337	3.21459310103377	0.00130629546201536	0.00431396618722384	91.930156661045	160.184186487782	216.179358309124	27.2263574092055	1.34706885590802	2.41194320612978	Cptp	ceramide-1-phosphate transfer protein [Source:MGI Symbol;Acc:MGI:1933107]
ENSMUSG00000026074	24.1686431564664	3.90526323118234	0.759435213615753	5.14232571938422	2.71358127804427e-07	1.43246223917812e-06	36.772062664418	41.5292335338695	57.7905215281816	7.53960666716459	0.898045903938679	0.482388641225955	Map4k4	mitogen-activated protein kinase kinase kinase kinase 4 [Source:MGI Symbol;Acc:MGI:1349394]
ENSMUSG00000024180	241.86921463755	3.90504566589935	0.232094681323111	16.8252268584429	1.59449795722749e-63	4.38733873761911e-62	574.05275603897	454.843986323333	331.760401365487	38.1169003728876	27.839423022099	24.6018207025237	Pgap6	post-glycosylphosphatidylinositol attachment to proteins 6 [Source:MGI Symbol;Acc:MGI:1926283]
ENSMUSG00000001211	913.357912706359	3.90205430683839	0.139329484208918	28.0059481235676	1.37518964030234e-172	1.00018909686785e-170	1734.41562233838	1566.24537899165	1836.45435078444	113.512967044534	144.136367582158	85.3827894969941	Agpat3	1-acylglycerol-3-phosphate O-acyltransferase 3 [Source:MGI Symbol;Acc:MGI:1336186]
ENSMUSG00000051177	10.0529485817199	3.90180774501807	2.98312076575315	1.30796171238243	0.190886296017855	0.318322990556995	36.772062664418	19.7758254923188	0	3.76980333358229	0	0	Plcb1	phospholipase C, beta 1 [Source:MGI Symbol;Acc:MGI:97613]
ENSMUSG00000050373	15.6427471948731	3.90178550506016	2.21836806009537	1.75885398606596	0.0786023124067688	0.157775493770656	20.4289237024544	63.2826415754202	4.28077937245789	5.86413851890579	0	0	Snx21	sorting nexin family member 21 [Source:MGI Symbol;Acc:MGI:1917729]
ENSMUSG00000070473	5.66753097446512	3.90103725385254	1.83698519329324	2.12360843630916	0.0337028995251303	0.0783335752932248	4.08578474049089	0	27.8250659209763	2.0943351853235	0	0	Cldn3	claudin 3 [Source:MGI Symbol;Acc:MGI:1329044]
ENSMUSG00000058709	1157.69254973056	3.89883606172592	0.107378632276793	36.3092356370844	1.15672176084167e-288	1.4985571395404e-286	2175.6803743114	2226.7579504351	2108.28384093551	168.803415937074	144.585390534127	122.044326230167	Egln2	egl-9 family hypoxia-inducible factor 2 [Source:MGI Symbol;Acc:MGI:1932287]
ENSMUSG00000018845	6.26575715385042	3.89688744997677	1.52111470595538	2.56186297767019	0.010411238493137	0.0282162939941479	8.17156948098178	9.88791274615941	17.1231174898316	0	0	2.41194320612978	Unc45b	unc-45 myosin chaperone B [Source:MGI Symbol;Acc:MGI:2443377]
ENSMUSG00000044709	14.8324974049943	3.89455199434673	2.06224120710571	1.8885045943838	0.058958241711561	0.124725914639681	46.9865245156452	0	36.3866246658921	0	2.2451147598467	3.37672048858169	Gemin7	gem nuclear organelle associated protein 7 [Source:MGI Symbol;Acc:MGI:1916981]
ENSMUSG00000001247	9.00507529924977	3.89299792759235	1.33779894571318	2.91000223917578	0.00361426166742571	0.0109849883572272	28.6004931834362	17.7982429430869	4.28077937245789	3.35093629651759	0	0	Lsr	lipolysis stimulated lipoprotein receptor [Source:MGI Symbol;Acc:MGI:1927471]
ENSMUSG00000024395	12.5028422147386	3.89123795411879	1.2200389712414	3.1894374244123	0.00142549997182644	0.00468029122217673	10.2144618512272	51.4171462800289	8.56155874491579	0	0	4.82388641225955	Lims2	LIM and senescent cell antigen like domains 2 [Source:MGI Symbol;Acc:MGI:2385067]
ENSMUSG00000037852	58.1863756776153	3.89123565532983	1.10501819032419	3.52142226200659	0.000429238501598257	0.00154872040742023	134.830896436199	108.767040207754	83.4751977629289	1.2566011111941	18.8589639827123	1.92955456490382	Cpe	carboxypeptidase E [Source:MGI Symbol;Acc:MGI:101932]
ENSMUSG00000032566	411.143026189875	3.87779152740805	0.162827793416613	23.8152925003797	2.31910996277668e-125	1.22215129690905e-123	794.685132025478	765.324446552739	749.136390180131	41.4678366694052	52.0866624284434	64.1576892830521	Nudt16l2	nudix hydrolase 16 like 2 [Source:MGI Symbol;Acc:MGI:1920782]
ENSMUSG00000019810	41.3599290716068	3.87662064214264	1.33153391842976	2.91139458671411	0.00359819297026906	0.0109422239316406	110.316187993254	77.1257194200434	44.9481834108079	11.7282770378116	4.04120656772405	0	Fuca2	fucosidase, alpha-L- 2, plasma [Source:MGI Symbol;Acc:MGI:1914098]
ENSMUSG00000049653	734.954817857098	3.86852439986097	0.114321398641729	33.8390226661285	5.26380122876152e-251	5.84516927518812e-249	1305.40822458684	1394.19569720848	1427.63992071471	95.9205514878162	92.4987281056839	94.0657850390613	Spatc1	spermatogenesis and centriole associated 1 [Source:MGI Symbol;Acc:MGI:1921531]
ENSMUSG00000020622	1672.9309731275	3.86718614844842	0.0858534790820449	45.0440237227053	0	0	2947.89369026418	3371.77824644036	3073.59958942477	208.59578445822	206.101534953927	229.616993223555	Nt5c1b	5'-nucleotidase, cytosolic IB [Source:MGI Symbol;Acc:MGI:1918131]
ENSMUSG00000016918	12.9078257695329	3.86627765963275	1.05422427714048	3.66741474605365	0.000245015203438884	0.000917295028648225	30.6433855536817	11.8654952953913	29.9654556072053	0	4.49022951969339	0.482388641225955	Sulf1	sulfatase 1 [Source:MGI Symbol;Acc:MGI:2138563]
ENSMUSG00000021384	33.9184691041557	3.86560859122004	0.519070748259137	7.44717093803599	9.53630271061889e-14	7.89505452805635e-13	55.158093996627	73.1705543215797	62.0713009006395	2.9320692594529	5.83729837560141	4.3414977710336	Susd3	sushi domain containing 3 [Source:MGI Symbol;Acc:MGI:1913579]
ENSMUSG00000020696	268.529298422175	3.86226606260682	0.188333141589484	20.5076282910712	1.84052804247919e-93	7.04327608132728e-92	459.650783305225	478.574976914116	569.344	36.8602992616935	30.0845377819457	36.6615367331726	Rffl	ring finger and FYVE like domain containing protein [Source:MGI Symbol;Acc:MGI:1914588]
ENSMUSG00000074746	1528.34968294717	3.86189851074936	0.0931214224809844	41.4716443097502	0	0	2872.30667256509	2855.62920109084	2853.13945174319	217.810859273644	204.305443146049	166.906469864181	Pdzd8	PDZ domain containing 8 [Source:MGI Symbol;Acc:MGI:2677270]
ENSMUSG00000022270	474.718227885797	3.85817014777952	0.179026279049059	21.5508592831907	5.19734516494135e-103	2.13331293123352e-101	860.057687873332	838.495000874318	965.315748489255	41.4678366694052	62.4141903237382	80.5589030847346	Retreg1	reticulophagy regulator 1 [Source:MGI Symbol;Acc:MGI:1913520]
ENSMUSG00000057706	253.791	3.85558172606239	0.196101440174776	19.6611596662732	4.63998643423082e-86	1.6209975079362e-84	496.422845969643	458.799151421797	468.745341284139	25.132022223882	34.5747673016391	39.0734799393024	Mex3b	mex3 RNA binding family member B [Source:MGI Symbol;Acc:MGI:1918252]
ENSMUSG00000119940	687.686427159621	3.85455198108888	0.131860091692173	29.2321348455248	7.57548107436992e-188	6.15792536744697e-186	1227.77831451751	1228.08	1404.09563416619	95.9205514878162	97.887003529316	72.3582961838933	Gm56924	predicted gene, 56924 [Source:MGI Symbol;Acc:MGI:7337761]
ENSMUSG00000007892	27.2285706095148	3.85348518867325	0.647644107932463	5.95000424071656	2.68135541477144e-09	1.66573512954607e-08	53.1152016263815	35.5964858861739	64.2116905868684	5.02640444477639	4.93925247166273	0.482388641225955	Rplp1	ribosomal protein lateral stalk subunit P1 [Source:MGI Symbol;Acc:MGI:1927099]
ENSMUSG00000029207	6.09222085186338	3.85130021756865	1.72855615785257	2.22804460246939	0.0258775408576258	0.0627121932280383	16.3431389619636	17.7982429430869	0	0	0	2.41194320612978	Apbb2	amyloid beta precursor protein binding family B member 2 [Source:MGI Symbol;Acc:MGI:108405]
ENSMUSG00000027332	23.6135713417759	3.84870253747632	0.723794561149032	5.31739632219184	1.0526262677443e-07	5.73937434981846e-07	34.7291702941726	59.3274764769565	38.527014352121	4.60753740771169	4.49022951969339	0	Ivd	isovaleryl coenzyme A dehydrogenase [Source:MGI Symbol;Acc:MGI:1929242]
ENSMUSG00000048217	8.06321412618928	3.8468914791637	3.04676105720803	1.26261672869381	0.206726952974497	0.337532770898579	38.8149550346634	0	6.42116905868684	0	3.14316066378538	0	Nags	N-acetylglutamate synthase [Source:MGI Symbol;Acc:MGI:2387600]
ENSMUSG00000021948	523.494818086873	3.83840909782729	0.135886866605184	28.2470940255006	1.54527131430668e-175	1.16475995975953e-173	1011.23172327149	986.813692066709	937.490682568279	69.1130611156754	61.0671214678302	75.2526280312491	Prkcd	protein kinase C, delta [Source:MGI Symbol;Acc:MGI:97598]
ENSMUSG00000043866	41.6510362252012	3.83751232114541	0.509781161609549	7.52776408808263	5.16165395176895e-14	4.34046586870524e-13	77.6299100693269	83.0584670677391	72.7732493317842	1.6754681482588	8.98045903938679	5.78866369471147	Taf10	TATA-box binding protein associated factor 10 [Source:MGI Symbol;Acc:MGI:1346320]
ENSMUSG00000034059	6.48728729892457	3.83506327748234	1.69443020897023	2.26333504748658	0.0236150433754029	0.0579747916422988	0	25.7085731400145	10.7019484311447	2.5132022223882	0	0	Ypel4	yippee like 4 [Source:MGI Symbol;Acc:MGI:3605071]
ENSMUSG00000037440	3.60247505701301	3.83009475293355	2.15798113009933	1.77485090092389	0.075922509166328	0.153456325393894	12.2573542214727	7.91033019692753	0	0	0	1.44716592367787	Vnn1	vanin 1 [Source:MGI Symbol;Acc:MGI:108395]
ENSMUSG00000036186	16.1302617017072	3.82629326093757	0.99858632777506	3.83171004299938	0.000127255665103331	0.000495361097618195	32.6862779239271	53.3947288292608	4.28077937245789	0	4.49022951969339	1.92955456490382	Dipk1b	divergent protein kinase domain 1B [Source:MGI Symbol;Acc:MGI:1927576]
ENSMUSG00000042684	17.0211059402693	3.82415973352214	1.9795212905285	1.93186087556611	0.0533766799326956	0.115331092481399	30.6433855536817	45.4843986323333	19.2635071760605	0	6.73534427954009	0	Npl	N-acetylneuraminate pyruvate lyase [Source:MGI Symbol;Acc:MGI:1921341]
ENSMUSG00000031399	3.27879805971796	3.82132651412844	2.32191822753667	1.64576274427308	0.0998126153706603	0.190131643033374	18.386031332209	0	0	0.837734074129399	0.449022951969339	0	Fam3a	FAM3 metabolism regulating signaling molecule A [Source:MGI Symbol;Acc:MGI:1913544]
ENSMUSG00000034248	64.6559501124867	3.81998291974234	0.384080905870673	9.94577668755186	2.63113439687236e-23	3.32217446638595e-22	128.702219325463	100.856710010826	132.704160546195	5.86413851890579	12.5726426551415	7.23582961838933	Slc25a37	solute carrier family 25, member 37 [Source:MGI Symbol;Acc:MGI:1914962]
ENSMUSG00000030990	50.6763288575238	3.81682646754491	1.14414562143817	3.33596213281595	0.000850047414516274	0.00290760167611081	32.6862779239271	120.632535503145	130.563770859966	6.70187259303519	0.449022951969339	13.0244933131008	Pgap2	post-GPI attachment to proteins 2 [Source:MGI Symbol;Acc:MGI:2385286]
ENSMUSG00000030022	2.13897483525797	3.81679069568379	2.70352573205014	1.41178264014134	0.158013971508415	0.274587084483744	4.08578474049089	7.91033019692753	0	0.837734074129399	0	0	Adamts9	ADAM metallopeptidase with thrombospondin type 1 motif 9 [Source:MGI Symbol;Acc:MGI:1916320]
ENSMUSG00000063820	103.081111507811	3.81340518453019	0.39001009303039	9.77770896876005	1.40351480957451e-22	1.72998153485413e-21	159.345604879145	144.363526093927	273.969879837305	23.8754211126879	5.83729837560141	11.094938748197	Arl9	ADP-ribosylation factor-like 9 [Source:MGI Symbol;Acc:MGI:1915496]
ENSMUSG00000026226	957.557339316528	3.81097489156483	0.101623909823194	37.5007702242039	8.94828855375244e-308	1.27919384762091e-305	1724.20116048715	1811.4656150964	1827.89279203952	135.294052971898	123.481311791568	123.009103512619	Spata3	spermatogenesis associated 3 [Source:MGI Symbol;Acc:MGI:1917310]
ENSMUSG00000046957	2702.98141720048	3.80614794120123	0.089613300957406	42.4730246574705	0	0	5507.63783018172	4837.16691542118	4792.33250746661	423.893441509476	333.17503036125	323.682778262616	Spz1	spermatogenic leucine zipper 1 [Source:MGI Symbol;Acc:MGI:1930801]
ENSMUSG00000096014	5.90366095698394	3.80428734388531	1.5559519475265	2.44499025174459	0.0144856057207737	0.0378482097372401	12.2573542214727	7.91033019692753	12.8423381173737	0	0	2.41194320612978	Sox1	SRY (sex determining region Y)-box 1 [Source:MGI Symbol;Acc:MGI:98357]
ENSMUSG00000047497	2.17665573158219	3.79936530859164	2.54270319345209	1.49422288782099	0.135117372267453	0.242474250204828	10.2144618512272	1.97758254923188	0	0.418867037064699	0.449022951969339	0	Adamts12	ADAM metallopeptidase with thrombospondin type 1 motif 12 [Source:MGI Symbol;Acc:MGI:2146046]
ENSMUSG00000003154	18.8138955346471	3.79146678078018	0.951027973144404	3.98670374357589	6.69975964980419e-05	0.000271593581370974	40.8578474049089	49.4395637307971	14.9827278036026	0.418867037064699	7.18436723150943	0	Foxj2	forkhead box J2 [Source:MGI Symbol;Acc:MGI:1926805]
ENSMUSG00000008398	13.4643306246788	3.78867513830068	0.900332390727691	4.20808489988736	2.57544109006584e-05	0.000110794745199408	10.2144618512272	41.5292335338695	23.5442865485184	1.2566011111941	1.34706885590802	2.89433184735573	Elk3	ELK3, member of ETS oncogene family [Source:MGI Symbol;Acc:MGI:101762]
ENSMUSG00000031538	15.0820053998404	3.78386495859126	0.908496077955671	4.16497665802349	3.11384421122717e-05	0.000132490182877292	28.6004931834362	23.7309905907826	32.1058452934342	4.60753740771169	0	1.44716592367787	Plat	plasminogen activator, tissue [Source:MGI Symbol;Acc:MGI:97610]
ENSMUSG00000057789	4.42299706295994	3.78266954608782	1.84495343360685	2.05027914373577	0.0403371986315568	0.0912299944318371	16.3431389619636	1.97758254923188	6.42116905868684	0	1.79609180787736	0	Bak1	BCL2-antagonist/killer 1 [Source:MGI Symbol;Acc:MGI:1097161]
ENSMUSG00000045252	809.487277524712	3.78161288759083	0.363549088979364	10.4019319597456	2.4295655180648e-25	3.33884048046099e-24	1405.50995072887	1669.07967155171	1453.32459694946	140.739324453739	127.971541311262	60.2985801532444	Zfp574	zinc finger protein 574 [Source:MGI Symbol;Acc:MGI:2442951]
ENSMUSG00000061099	7375.42775416814	3.78036582081782	0.0565822013200493	66.8119255282188	0	0	13787.4806067865	14173.3341303449	13291.8199514818	1107.48444599906	979.768081197099	912.679309199508	Gapdhs	glyceraldehyde-3-phosphate dehydrogenase, spermatogenic [Source:MGI Symbol;Acc:MGI:95653]
ENSMUSG00000057286	646.818457046719	3.77454622450368	0.149338298811819	25.2751387590131	5.99548439362955e-141	3.58489612517167e-139	1266.59326955218	1247.85458856532	1102.30068840791	79.1658700052282	113.602806848243	71.3935189014414	St6galnac2	ST6 (alpha-N-acetyl-neuraminyl-2,3-beta-galactosyl-1,3)-N-acetylgalactosaminide alpha-2,6-sialyltransferase 2 [Source:MGI Symbol;Acc:MGI:107553]
ENSMUSG00000062866	8.32395537065568	3.77185794761878	1.33911243923568	2.81668501994621	0.00485220861603147	0.0143002176676738	14.3002465917181	23.7309905907826	8.56155874491579	3.35093629651759	0	0	Phactr2	phosphatase and actin regulator 2 [Source:MGI Symbol;Acc:MGI:2446138]
ENSMUSG00000028758	1787.86205823447	3.7638074651867	0.0962627757795525	39.0993032842315	0	0	3366.68662616449	3175.9975740664	3450.30817420106	284.829585203996	243.370439967382	205.979949803483	Kif17	kinesin family member 17 [Source:MGI Symbol;Acc:MGI:1098229]
ENSMUSG00000096001	3.26155970334105	3.75954709965648	2.07675233517396	1.81030113027009	0.0702491018800343	0.144158938650551	8.17156948098178	7.91033019692753	2.14038968622895	0	1.34706885590802	0	Gpr15lg	G protein coupled receptor 15 ligand [Source:MGI Symbol;Acc:MGI:1917295]
ENSMUSG00000042293	2000.53337429423	3.75593354111215	0.0816296033543066	46.0119048332237	0	0	3744.6217146599	3618.97606509434	3812.03403117375	283.154117055737	242.921417015413	301.492900766222	Gm5617	predicted gene 5617 [Source:MGI Symbol;Acc:MGI:3643566]
ENSMUSG00000034330	43.1899638865702	3.75565134370365	0.513387423261248	7.31543308919842	2.56552592975231e-13	2.0786609764384e-12	116.44486510399	69.2153892231159	55.6501318419526	4.60753740771169	10.3275278952948	2.89433184735573	Plcg2	phospholipase C, gamma 2 [Source:MGI Symbol;Acc:MGI:97616]
ENSMUSG00000031647	489.727546165443	3.75397860457275	0.169071204018944	22.2035362340717	3.17466890066868e-109	1.3902590534372e-107	905.001320018732	844.427748522014	986.719645351545	88.7998118577163	51.1886165245047	62.2281347181483	Mfap3l	microfibrillar-associated protein 3-like [Source:MGI Symbol;Acc:MGI:1918556]
ENSMUSG00000067438	38.0832417211715	3.75374591943031	0.495229344150826	7.57981319920954	3.46052843872e-14	2.93578391489499e-13	83.7585871800632	45.4843986323333	83.4751977629289	4.18867037064699	6.28632132757075	5.30627505348551	Hmx1	H6 homeobox 1 [Source:MGI Symbol;Acc:MGI:107178]
ENSMUSG00000079299	41.2352025529932	3.7522626098818	0.562904967286622	6.66589003108089	2.63066187359961e-11	1.88248226248322e-10	61.2867711073633	81.0808845185072	87.7559771353868	0.837734074129399	5.83729837560141	10.612550106971	Klrb1	killer cell lectin-like receptor subfamily B member 1 [Source:MGI Symbol;Acc:MGI:96877]
ENSMUSG00000035530	28.4336659095395	3.75093443601487	0.685447313119939	5.47224325519901	4.44374285136953e-08	2.49850044495854e-07	55.158093996627	41.5292335338695	62.0713009006395	4.60753740771169	0	7.23582961838933	Eif1	eukaryotic translation initiation factor 1 [Source:MGI Symbol;Acc:MGI:105125]
ENSMUSG00000055602	40.3627184280345	3.74400455698019	1.38837465531888	2.69668172249965	0.00700341732296807	0.0197868017368818	63.3296634776088	59.3274764769565	102.738704938989	13.4037451860704	0	3.37672048858169	Tcp10b	t-complex protein 10b [Source:MGI Symbol;Acc:MGI:98542]
ENSMUSG00000063457	27.5599529416607	3.73581435332522	1.38960075298048	2.68840841177761	0.00717935275061256	0.0202378989481796	61.2867711073633	45.4843986323333	47.0885730970368	10.0528088895528	0	1.44716592367787	Rps15	ribosomal protein S15 [Source:MGI Symbol;Acc:MGI:98117]
ENSMUSG00000076435	4.46113823756821	3.73282915832538	1.83407220423949	2.0352683769466	0.0418238762548553	0.0939941360646251	0	9.88791274615941	14.9827278036026	0	0.449022951969339	1.44716592367787	Acsf2	acyl-CoA synthetase family member 2 [Source:MGI Symbol;Acc:MGI:2388287]
ENSMUSG00000062168	70.4033274511613	3.73037252710379	0.353121593194575	10.5639887194559	4.37660342724832e-26	6.10222161711742e-25	134.830896436199	142.385943544696	115.581043056363	11.3094100007469	6.73534427954009	11.5773273894229	Ppef1	protein phosphatase with EF hand calcium-binding domain 1 [Source:MGI Symbol;Acc:MGI:1097157]
ENSMUSG00000032601	941.504192774881	3.72864682764808	0.114219417720132	32.6445967075778	9.56066964607349e-234	1.00767837617132e-231	1703.7722367847	1576.13329173781	1973.43929070309	143.252526676127	127.971541311262	124.456269436297	Prkar2a	protein kinase, cAMP dependent regulatory, type II alpha [Source:MGI Symbol;Acc:MGI:108025]
ENSMUSG00000030782	2.12726	3.72795027079927	2.98041159929309	1.25081726016751	0.211001156163155	0.343385124759064	0	11.8654952953913	0	0	0.898045903938679	0	Tgfb1i1	transforming growth factor beta 1 induced transcript 1 [Source:MGI Symbol;Acc:MGI:102784]
ENSMUSG00000055044	1.14000601595859	3.72694981356045	3.82290440813243	0.974900080062725	0.329609826405741	NA	0	0	6.42116905868684	0.418867037064699	0	0	Pdlim1	PDZ and LIM domain 1 (elfin) [Source:MGI Symbol;Acc:MGI:1860611]
ENSMUSG00000047344	1.14503200177603	3.72692971074264	3.81665176817672	0.976491945589015	0.328820737353274	NA	0	0	6.42116905868684	0	0.449022951969339	0	Lancl3	LanC lantibiotic synthetase component C-like 3 (bacterial) [Source:MGI Symbol;Acc:MGI:2443335]
ENSMUSG00000053719	22.6605037591577	3.7241764848447	0.79309866816002	4.69572908687988	2.65657444544076e-06	1.28011686857601e-05	36.772062664418	29.6637382384782	59.9309112144105	0	7.18436723150943	2.41194320612978	Klk1b26	kallikrein 1-related petidase b26 [Source:MGI Symbol;Acc:MGI:891981]
ENSMUSG00000078317	3.03078732817644	3.72262882201962	2.33546247378294	1.59395788363483	0.110945468343357	0.207368318272667	4.08578474049089	0	12.8423381173737	1.2566011111941	0	0	F8a	factor 8-associated gene A [Source:MGI Symbol;Acc:MGI:95474]
ENSMUSG00000061923	8490.61163941254	3.71724904279956	0.0583715601930155	63.6825370181616	0	0	15380.9366555779	15743.534674435	16219.873042243	1292.2048093446	1047.1215239925	1259.9991308822	Odf1	outer dense fiber of sperm tails 1 [Source:MGI Symbol;Acc:MGI:97424]
ENSMUSG00000075415	21.529684454179	3.71511273626915	2.16157942963757	1.71870285464923	0.0856684919879846	0.168825706679538	59.2438787371179	15.8206603938551	44.9481834108079	0	0	9.16538418329315	Fnbp1	formin binding protein 1 [Source:MGI Symbol;Acc:MGI:109606]
ENSMUSG00000062825	3.2834107647499	3.71420046701306	2.0927531061927	1.77479152032903	0.0759323169955795	0.153456325393894	0	11.8654952953913	6.42116905868684	0	0.449022951969339	0.964777282451911	Actg1	actin, gamma, cytoplasmic 1 [Source:MGI Symbol;Acc:MGI:87906]
ENSMUSG00000034673	3.01990235800752	3.71413159504663	2.19699341630045	1.69055199141239	0.0909224004300195	0.176605012361105	2.04289237024544	1.97758254923188	12.8423381173737	1.2566011111941	0	0	Pbx2	pre B cell leukemia homeobox 2 [Source:MGI Symbol;Acc:MGI:1341793]
ENSMUSG00000074646	32.3002845365836	3.71404250257021	1.29783752377112	2.86171607350229	0.00421354183532141	0.0125910186943518	46.9865245156452	47.4619811815652	85.6155874491579	0	9.87850494332547	3.85910912980764	6430550D23Rik	RIKEN cDNA 6430550D23 gene [Source:MGI Symbol;Acc:MGI:2443361]
ENSMUSG00000033917	221.845487475669	3.71391263146245	0.248078258349925	14.9707300275537	1.14062279249749e-50	2.58395731699295e-49	465.779460415961	437.045743380246	333.900791051716	37.2791662987582	17.5118951268042	39.5558685805283	Gde1	glycerophosphodiester phosphodiesterase 1 [Source:MGI Symbol;Acc:MGI:1891827]
ENSMUSG00000057719	611.465474379707	3.7082340562383	0.134747504758152	27.5198717994365	1.01555750378609e-166	7.25890153711931e-165	990.80279956904	1216.21326777761	1200.75861397444	85.030008524134	79.0280395466037	96.9601168864171	Sh3rf2	SH3 domain containing ring finger 2 [Source:MGI Symbol;Acc:MGI:2444628]
ENSMUSG00000073988	5.5467735374335	3.70432021723154	1.66827560756226	2.22044858801503	0.0263883319338	0.063782036492565	2.04289237024544	13.8430778446232	14.9827278036026	0	0	2.41194320612978	Ttpa	tocopherol (alpha) transfer protein [Source:MGI Symbol;Acc:MGI:1354168]
ENSMUSG00000051728	182.456619172083	3.70306915138995	0.273957023369332	13.5169710411027	1.24184494305589e-41	2.36521065188149e-40	351.377487682216	322.345955524797	342.462349796632	13.4037451860704	25.5943082622523	39.5558685805283	Fam243	family with sequence similarity 243 [Source:MGI Symbol;Acc:MGI:1922578]
ENSMUSG00000025499	20.6042228317747	3.70185677487317	0.714387566783423	5.18186058520171	2.19683396798323e-07	1.16710910123056e-06	32.6862779239271	41.5292335338695	40.6674	3.76980333358229	4.49022951969339	0.482388641225955	Hras	Harvey rat sarcoma virus oncogene [Source:MGI Symbol;Acc:MGI:96224]
ENSMUSG00000053226	17.8315120107991	3.70172122308761	2.02404939771386	1.82886901242068	0.0674192333660562	0.139238293818273	36.772062664418	19.7758254923188	42.8077937245789	0	7.63339018347877	0	Dand5	DAN domain family member 5, BMP antagonist [Source:MGI Symbol;Acc:MGI:1344365]
ENSMUSG00000032411	2.98203867018469	3.6999966912065	2.33372430475307	1.58544721142543	0.112864761731771	0.210231073750582	10.2144618512272	0	6.42116905868684	1.2566011111941	0	0	Tfdp2	transcription factor Dp 2 [Source:MGI Symbol;Acc:MGI:107167]
ENSMUSG00000024414	4.19089728740479	3.69527032029311	2.05688454894842	1.79653754615557	0.0724090669329592	0.147679823785702	4.08578474049089	0	19.2635071760605	0	1.79609180787736	0	Mrpl27	mitochondrial ribosomal protein L27 [Source:MGI Symbol;Acc:MGI:2137224]
ENSMUSG00000027286	617.663309007202	3.69515511897092	0.141224202796976	26.165168900143	6.62361591209191e-151	4.2029546478922e-149	1221.64963740678	1093.60314972523	1125.84497495643	108.905429636822	82.1712002103891	73.8054621075712	Lrrc57	leucine rich repeat containing 57 [Source:MGI Symbol;Acc:MGI:1913856]
ENSMUSG00000024084	43.4554137694575	3.69434227922442	1.38226490829407	2.67267313020615	0.00752495334215834	0.0210973500262451	67.4154482180997	88.9912147154347	85.6155874491579	0	14.3687344630189	4.3414977710336	Qpct	glutaminyl-peptide cyclotransferase (glutaminyl cyclase) [Source:MGI Symbol;Acc:MGI:1917786]
ENSMUSG00000035295	99.5718988219688	3.69341686779537	0.356782260317157	10.3520193647301	4.09750692037889e-25	5.58167508967714e-24	138.91668117669	201.713420021652	214.038968622895	11.7282770378116	23.798216454375	7.23582961838933	Wdr38	WD repeat domain 38 [Source:MGI Symbol;Acc:MGI:1923896]
ENSMUSG00000090369	2176.7082699408	3.69276279851895	0.0873592085007773	42.2710194138961	0	0	4053.09846256696	4164.78884868234	3906.21117736783	360.644518912706	304.886584387181	270.620027727761	4933411K16Rik	RIKEN cDNA 4933411K16 gene [Source:MGI Symbol;Acc:MGI:1914015]
ENSMUSG00000098678	71.759499905139	3.69086104859281	0.386146443943817	9.55818992115287	1.19834162494946e-21	1.42893334510991e-20	98.0588337717813	156.229021389319	145.546498663568	16.3358144455233	7.63339018347877	6.75344097716338	Mroh6	maestro heat-like repeat family member 6 [Source:MGI Symbol;Acc:MGI:5011755]
ENSMUSG00000054889	2.20368858398743	3.68995500905622	2.93998700636029	1.25509228478679	0.209445260900367	0.341130265822141	12.2573542214727	0	0	0	0	0.964777282451911	Dsp	desmoplakin [Source:MGI Symbol;Acc:MGI:109611]
ENSMUSG00000063019	9.80925641051029	3.68329553196693	1.27424817111256	2.89056371864439	0.00384551565575499	0.0116168759316553	24.5147084429453	23.7309905907826	6.42116905868684	4.18867037064699	0	0	Manbal	mannosidase, beta A, lysosomal-like [Source:MGI Symbol;Acc:MGI:1916411]
ENSMUSG00000000942	70.7165825161102	3.67986893348029	0.436200065489985	8.43619527967442	3.27834869547284e-17	3.2333721431876e-16	177.731636211354	104.81187510929	111.300263683905	16.3358144455233	11.2255737992335	2.89433184735573	Hoxa4	homeobox A4 [Source:MGI Symbol;Acc:MGI:96176]
ENSMUSG00000040852	681.561440832536	3.67831872899198	0.123792835267106	29.7135025710924	5.13904950351777e-194	4.23273898511593e-192	1237.99277636874	1352.66646367461	1202.89900366067	110.162030748016	98.3360264812853	87.3123440618979	Plekhh2	pleckstrin homology domain containing, family H (with MyTH4 domain) member 2 [Source:MGI Symbol;Acc:MGI:2146813]
ENSMUSG00000033278	6.18800192746951	3.67749006290629	1.53497088101231	2.3958044471052	0.0165839354381719	0.0425442254629835	10.2144618512272	17.7982429430869	6.42116905868684	0	2.69413771181604	0	Ptprm	protein tyrosine phosphatase receptor type M [Source:MGI Symbol;Acc:MGI:102694]
ENSMUSG00000020435	2548.32129855934	3.67695461914631	0.0681754231172482	53.9337264225361	0	0	4463.7198289863	4777.83943894423	4940.01939581641	372.372795950518	378.526348510153	357.449983148433	Osbp2	oxysterol binding protein 2 [Source:MGI Symbol;Acc:MGI:1921559]
ENSMUSG00000033578	5.83928969637409	3.67042196283659	1.64302522868074	2.23394132893731	0.025486933738977	0.0618861762810732	22.4718160726999	7.91033019692753	2.14038968622895	2.5132022223882	0	0	Tmem35a	transmembrane protein 35A [Source:MGI Symbol;Acc:MGI:1914814]
ENSMUSG00000051343	1221.84647670348	3.66694434690038	0.303831704813196	12.0689983593217	1.53997275787554e-33	2.53677366750969e-32	2063.3212939479	2359.25598123364	2373.6921620279	252.157956312949	130.216656071108	152.434810627402	Rab11fip5	RAB11 family interacting protein 5 (class I) [Source:MGI Symbol;Acc:MGI:1098586]
ENSMUSG00000058715	1.10184429199371	3.6662722022918	3.87117256727459	0.9470702063982	0.343603005328556	NA	6.12867711073633	0	0	0	0	0.482388641225955	Fcer1g	Fc receptor, IgE, high affinity I, gamma polypeptide [Source:MGI Symbol;Acc:MGI:95496]
ENSMUSG00000025036	1.09628334378428	3.6662691879512	3.8784594483987	0.945290065998986	0.344510808628028	NA	6.12867711073633	0	0	0	0.449022951969339	0	Sfxn2	sideroflexin 2 [Source:MGI Symbol;Acc:MGI:2137678]
ENSMUSG00000060961	1.09628334378428	3.6662691879512	3.8784594483987	0.945290065998986	0.344510808628028	NA	6.12867711073633	0	0	0	0.449022951969339	0	Slc4a4	solute carrier family 4 (anion exchanger), member 4 [Source:MGI Symbol;Acc:MGI:1927555]
ENSMUSG00000026842	453.912245992161	3.66558419897488	0.166127110337851	22.0649368517891	6.86644319636614e-108	2.93463759564281e-106	925.430243721186	826.629505578927	772.68067672865	80.841338153487	49.3925247166273	68.4991870540857	Abl1	c-abl oncogene 1, non-receptor tyrosine kinase [Source:MGI Symbol;Acc:MGI:87859]
ENSMUSG00000071644	98.4421446587359	3.6648319327367	0.321214220031523	11.409307882998	3.75706796740972e-30	5.8045533305186e-29	200.203452284054	176.004846881638	171.231174898316	9.63394185248809	22.0021246464976	11.5773273894229	Eef1g	eukaryotic translation elongation factor 1 gamma [Source:MGI Symbol;Acc:MGI:1914410]
ENSMUSG00000054000	17.7922626958422	3.66450536921671	0.847033942544529	4.32627924945766	1.51649149475568e-05	6.73112231273248e-05	42.9007397751543	19.7758254923188	36.3866246658921	5.44527148184109	2.2451147598467	0	Tusc1	tumor suppressor candidate 1 [Source:MGI Symbol;Acc:MGI:2684283]
ENSMUSG00000060962	18.6496279401509	3.66431347490778	0.827964211739467	4.42569065540821	9.61342062081888e-06	4.37796090300712e-05	26.5576008131908	51.4171462800289	25.6846762347474	2.9320692594529	0	5.30627505348551	Dmkn	dermokine [Source:MGI Symbol;Acc:MGI:1920962]
ENSMUSG00000026295	2.90063510168616	3.66188809950529	2.35607706059198	1.55423103970344	0.120129316023623	0.22032860984896	10.2144618512272	5.93274764769565	0	1.2566011111941	0	0	Spp2	secreted phosphoprotein 2 [Source:MGI Symbol;Acc:MGI:1922646]
ENSMUSG00000032872	40.1801153905422	3.66087237442152	1.37180562640815	2.66865239793987	0.00761562205080776	0.0212939504149946	57.2009863668724	61.3050590261884	104.879094625218	4.18867037064699	0	13.5068819543268	Cyb5r4	cytochrome b5 reductase 4 [Source:MGI Symbol;Acc:MGI:2386848]
ENSMUSG00000043157	3.22933808479866	3.65961587321537	2.27688135634191	1.60729317890107	0.107990069911455	0.202819767364658	4.08578474049089	13.8430778446232	0	0	0	1.44716592367787	Arl11	ADP-ribosylation factor-like 11 [Source:MGI Symbol;Acc:MGI:2444054]
ENSMUSG00000022997	1.09076295611034	3.65930937545993	3.55096247257365	1.03051198195506	0.302769730522807	NA	0	3.95516509846377	2.14038968622895	0	0.449022951969339	0	Wnt1	wingless-type MMTV integration site family, member 1 [Source:MGI Symbol;Acc:MGI:98953]
ENSMUSG00000028896	646.916957237133	3.65258610155566	0.132245262065113	27.6197879948035	6.43866202595187e-168	4.62876529576667e-166	1170.57732815064	1239.94425836839	1185.77588617084	110.999764822145	96.539934673408	77.6645712373788	Rcc1	regulator of chromosome condensation 1 [Source:MGI Symbol;Acc:MGI:1913989]
ENSMUSG00000022414	4.06074506091451	3.6507785774927	1.84691120513643	1.97669415147818	0.0480762123031521	0.105677598517904	10.2144618512272	5.93274764769565	6.42116905868684	0	1.79609180787736	0	Tab1	TGF-beta activated kinase 1/MAP3K7 binding protein 1 [Source:MGI Symbol;Acc:MGI:1913763]
ENSMUSG00000092035	18.2686011715061	3.65048854868686	2.07726811315297	1.7573506884222	0.0788580529259214	0.158110205423131	42.9007397751543	15.8206603938551	42.8077937245789	0	8.08241313544811	0	Peg10	paternally expressed 10 [Source:MGI Symbol;Acc:MGI:2157785]
ENSMUSG00000020642	36.2088227681936	3.64927968442629	0.552755722917485	6.60197539912409	4.05714851108681e-11	2.85885303299641e-10	116.44486510399	35.5964858861739	49.2289627832658	6.70187259303519	4.93925247166273	4.3414977710336	Rnf144a	ring finger protein 144A [Source:MGI Symbol;Acc:MGI:1344401]
ENSMUSG00000049577	100.334655276628	3.64744938958053	0.296453052550935	12.3036324240711	8.65906483219378e-35	1.45727725734769e-33	206.33212939479	154.251438840087	196.915851133063	15.9169474084586	11.2255737992335	17.3659910841344	Zfpm1	zinc finger protein, multitype 1 [Source:MGI Symbol;Acc:MGI:1095400]
ENSMUSG00000039096	2.13837876297387	3.64666458001913	2.97289630328162	1.22663699234775	0.219959059000154	0.353860580080203	0	11.8654952953913	0	0	0	0.964777282451911	Rsad1	radical S-adenosyl methionine domain containing 1 [Source:MGI Symbol;Acc:MGI:3039628]
ENSMUSG00000042439	8.54999964988779	3.64341543692019	1.39495112884531	2.61185883976888	0.00900514278426219	0.0246852459351706	30.6433855536817	3.95516509846377	12.8423381173737	0	0	3.85910912980764	Zfp532	zinc finger protein 532 [Source:MGI Symbol;Acc:MGI:3036282]
ENSMUSG00000008393	290.381055606026	3.64207578132772	0.174471961271279	20.8748486277679	9.06556533264113e-97	3.54554830320936e-95	569.966971298479	533.947288292608	509.412745322489	46.9131081512463	44.9022951969339	37.1439253743986	Carhsp1	calcium regulated heat stable protein 1 [Source:MGI Symbol;Acc:MGI:1196368]
ENSMUSG00000038260	340.45306597381	3.64062950645159	0.21009183144711	17.3287532474489	2.8544959601378e-67	8.18003830788797e-66	794.685132025478	539.880035940304	556.501318419526	58.6413851890579	33.6767213977005	59.3338028707925	Trpm4	transient receptor potential cation channel, subfamily M, member 4 [Source:MGI Symbol;Acc:MGI:1915917]
ENSMUSG00000033111	23.1225045495216	3.63936076004452	0.843302618535913	4.31560471893582	1.59166574602352e-05	7.04718650170686e-05	51.0723092561361	23.7309905907826	53.5097421557237	1.2566011111941	0	9.16538418329315	Cep15	centrosomal protein 15 [Source:MGI Symbol;Acc:MGI:1917937]
ENSMUSG00000026979	6.40058011156605	3.63654783311559	1.70187176171492	2.13679309741362	0.0326148238131721	0.0764043254406521	18.386031332209	0	17.1231174898316	0	0	2.89433184735573	Psd4	pleckstrin and Sec7 domain containing 4 [Source:MGI Symbol;Acc:MGI:2674093]
ENSMUSG00000001229	4.81284775756432	3.63470648334902	1.81186739911496	2.00605545699672	0.0448503315101422	0.099501172492265	22.4718160726999	0	4.28077937245789	1.6754681482588	0.449022951969339	0	Dpp9	dipeptidylpeptidase 9 [Source:MGI Symbol;Acc:MGI:2443967]
ENSMUSG00000057805	11.9454480180485	3.63124005842127	1.04976506192233	3.45909784020793	0.000541987986173848	0.00192097594301629	14.3002465917181	17.7982429430869	34.2462349796631	0.837734074129399	4.49022951969339	0	1700084M14Rik	RIKEN cDNA 1700084M14 gene [Source:MGI Symbol;Acc:MGI:1920737]
ENSMUSG00000000386	1.0636284332775	3.6238856936259	3.92112090213197	0.924196367333519	0.355384086636566	NA	0	5.93274764769565	0	0	0.449022951969339	0	Mx1	MX dynamin-like GTPase 1 [Source:MGI Symbol;Acc:MGI:97243]
ENSMUSG00000028141	16204.9789701808	3.62253230468594	0.0319515957453246	113.375630236434	0	0	30169.4345237847	29794.2586867275	29963.315217519	2343.14220533993	2514.97755398027	2444.74563373314	Oaz3	ornithine decarboxylase antizyme 3 [Source:MGI Symbol;Acc:MGI:1858170]
ENSMUSG00000040390	147.281118767151	3.6217013580735	0.262780340533746	13.7822386207328	3.26003930830993e-43	6.37501711909601e-42	189.988990432826	336.18903336942	291.092997327137	20.943351853235	24.2472394063443	21.225100213942	Map3k10	mitogen-activated protein kinase kinase kinase 10 [Source:MGI Symbol;Acc:MGI:1346879]
ENSMUSG00000041009	179.251342804982	3.61598814618525	0.299496477936841	12.0735581636716	1.45695601013013e-33	2.40320449575444e-32	410.621366419334	270.928809244768	312.496894189426	21.7810859273644	14.8177574149882	44.8621436340139	Iqcf4	IQ motif containing F4 [Source:MGI Symbol;Acc:MGI:1914570]
ENSMUSG00000019787	6.28115705006575	3.61513780707239	1.51877112185231	2.38030454691773	0.0172983350210827	0.0441311574681447	16.3431389619636	9.88791274615941	8.56155874491579	0	0	2.89433184735573	Trdn	triadin [Source:MGI Symbol;Acc:MGI:1924007]
ENSMUSG00000002105	107.311896313652	3.61384024868036	0.307848489543965	11.7390221859908	8.04107414308546e-32	1.28543495009709e-30	173.645851470863	185.892759627797	235.442865485184	10.0528088895528	16.1648262708962	22.6722661376199	Slc39a13	solute carrier family 39 (metal ion transporter), member 13 [Source:MGI Symbol;Acc:MGI:1915677]
ENSMUSG00000027409	174.345078661521	3.61375056885863	0.236398891101721	15.2866646371182	9.38343013227498e-53	2.26166125106791e-51	263.533115761662	316.413207877101	387.410533207439	30.9961607427878	26.492354166191	21.225100213942	1700020A23Rik	RIKEN cDNA 1700020A23 gene [Source:MGI Symbol;Acc:MGI:1922906]
ENSMUSG00000067274	168.279042184432	3.61100031164486	0.605781560418904	5.96089506116333	2.50860034334754e-09	1.56153465816884e-08	367.72062664418	330.256285721724	235.442865485184	40.6301025952758	26.9413771181604	8.6829955420672	Rplp0	ribosomal protein lateral stalk subunit P0 [Source:MGI Symbol;Acc:MGI:1927636]
ENSMUSG00000028101	5.63968902614678	3.61099062144298	1.61513942187184	2.2357144977974	0.0253704787531295	0.0616515522181852	6.12867711073633	5.93274764769565	19.2635071760605	2.5132022223882	0	0	Pias3	protein inhibitor of activated STAT 3 [Source:MGI Symbol;Acc:MGI:1913126]
ENSMUSG00000042328	85.8935268878183	3.61034982964996	0.334639716259763	10.7887667070798	3.88974286349116e-27	5.54779036619719e-26	153.216927768408	179.960011980101	143.406108977339	17.1735485196527	14.3687344630189	7.23582961838933	Hps4	HPS4, biogenesis of lysosomal organelles complex 3 subunit 2 [Source:MGI Symbol;Acc:MGI:2177742]
ENSMUSG00000028836	24.2760323552418	3.60880933543291	0.760783256019741	4.7435446388679	2.10010639256205e-06	1.02267122961215e-05	55.158093996627	21.7534080415507	57.7905215281816	3.76980333358229	7.18436723150943	0	Slc30a2	solute carrier family 30 (zinc transporter), member 2 [Source:MGI Symbol;Acc:MGI:106637]
ENSMUSG00000049506	2143.21037600548	3.60879100524434	0.0698803931978516	51.6424	0	0	3981.59722960837	3891.88245688834	4011.09027199305	317.082347057977	316.561181138384	341.048769346751	Sppl2c	signal peptide peptidase 2C [Source:MGI Symbol;Acc:MGI:3045264]
ENSMUSG00000020868	6.25954291490684	3.60874136860373	1.56909149988821	2.29989224265177	0.0214543256928672	0.0532483433730171	22.4718160726999	7.91033019692753	4.28077937245789	0	0	2.89433184735573	Xylt2	xylosyltransferase II [Source:MGI Symbol;Acc:MGI:2444797]
ENSMUSG00000034928	392.172123890091	3.59949388592494	0.176564	20.3863878414525	2.20863206578687e-92	8.24887597663402e-91	708.883652475169	743.571038511188	721.311324259155	51.1017785218933	79.9260854505424	48.2388641225956	Rnf44	ring finger protein 44 [Source:MGI Symbol;Acc:MGI:2145310]
ENSMUSG00000042662	104.218348764903	3.59781908089006	0.675769330732456	5.32403427807303	1.01490768622721e-07	5.54343737093008e-07	200.203452284054	225.444410612435	151.967667722255	23.8754211126879	4.04120656772405	19.7779342902642	Dusp15	dual specificity phosphatase-like 15 [Source:MGI Symbol;Acc:MGI:1934928]
ENSMUSG00000029672	5.87465438859478	3.59574213519544	1.56265818614801	2.30104201102292	0.0213892565677846	0.0530974419029015	8.17156948098178	15.8206603938551	8.56155874491579	0	2.69413771181604	0	Fam3c	FAM3 metabolism regulating signaling molecule C [Source:MGI Symbol;Acc:MGI:107892]
ENSMUSG00000032352	293.099908412306	3.5941946972948	0.217824064903928	16.5004481891385	3.64179535719256e-61	9.69871710008647e-60	531.152016263816	547.790366137231	545.799369988381	64.086656670899	41.3101115811792	28.4609298323314	Lrrc1	leucine rich repeat containing 1 [Source:MGI Symbol;Acc:MGI:2442313]
ENSMUSG00000020823	669.29645726394	3.58921965042626	0.136365198107232	26.3206426584285	1.11319692412939e-152	7.21084903406108e-151	1048.00378593591	1338.82338582998	1320.62043640326	89.218678894781	115.39889865612	103.71355786358	Sec14l1	SEC14-like lipid binding 1 [Source:MGI Symbol;Acc:MGI:1921386]
ENSMUSG00000038146	4.87617997115189	3.58599452838679	1.71669097979848	2.08889926642927	0.0367167919025509	0.084392301033455	10.2144618512272	3.95516509846377	12.8423381173737	0	2.2451147598467	0	Notch3	notch 3 [Source:MGI Symbol;Acc:MGI:99460]
ENSMUSG00000018559	32.8102787939689	3.58523875211146	1.5376944387589	2.33156774307201	0.0197234424259611	0.0494956524317349	96.0159414015359	51.4171462800289	34.2462349796631	1.6754681482588	0	13.5068819543268	Ctdnep1	CTD nuclear envelope phosphatase 1 [Source:MGI Symbol;Acc:MGI:1914431]
ENSMUSG00000033319	385.280993689983	3.58256970072136	0.150175551903718	23.8558783723881	8.79940184848785e-126	4.67684447818989e-124	710.926544845415	733.683125765028	689.205478965721	64.5055237079637	58.3729837560141	54.9923050997589	Fem1c	fem 1 homolog c [Source:MGI Symbol;Acc:MGI:2444737]
ENSMUSG00000004798	348.368553488725	3.57843990921606	0.223923766754798	15.9806168013176	1.74411561284714e-57	4.46328515987241e-56	721.141006696642	644.691911049594	562.922487478213	40.2112355582111	82.1712002103891	39.0734799393024	Ulk2	unc-51 like kinase 2 [Source:MGI Symbol;Acc:MGI:1352758]
ENSMUSG00000033227	9.66022720881528	3.57300283898661	1.27589521369942	2.80038893525338	0.00510410681611119	0.0149258820766459	28.6004931834362	9.88791274615941	14.9827278036026	0	4.49022951969339	0	Wnt6	wingless-type MMTV integration site family, member 6 [Source:MGI Symbol;Acc:MGI:98960]
ENSMUSG00000029364	9.11204273443123	3.57076730449342	1.33651467209729	2.67170078940479	0.00754679073300166	0.0211442749146974	22.4718160726999	23.7309905907826	4.28077937245789	4.18867037064699	0	0	Wsb2	WD repeat and SOCS box-containing 2 [Source:MGI Symbol;Acc:MGI:2144041]
ENSMUSG00000072825	100.776407285603	3.56903293190655	0.351375668996295	10.1573138006439	3.07429851147721e-24	4.06323598164103e-23	100.101726142027	241.26507100629	216.179358309124	10.4716759266175	19.7570098866509	16.8836024429084	Cep170b	centrosomal protein 170B [Source:MGI Symbol;Acc:MGI:2145043]
ENSMUSG00000029477	805.149459768672	3.56835343733113	0.114787767160072	31.0865306087454	3.66287719543542e-212	3.45115179391139e-210	1552.59820138654	1504.94031996546	1397.6744651075	115.607302229857	141.891252822311	118.185217100359	Morn3	MORN repeat containing 3 [Source:MGI Symbol;Acc:MGI:1922140]
ENSMUSG00000032478	18.1473722269454	3.56557555083355	0.73411604378835	4.85696448266362	1.19198964811635e-06	5.9370345429007e-06	28.6004931834362	37.5740684354058	34.2462349796631	4.18867037064699	0.898045903938679	3.37672048858169	Nme6	NME/NM23 nucleoside diphosphate kinase 6 [Source:MGI Symbol;Acc:MGI:1861676]
ENSMUSG00000074491	4.05569852574046	3.56109394832998	2.05073151344273	1.73649935400451	0.0824755784933231	0.163988612265621	0	13.8430778446232	8.56155874491579	0	0	1.92955456490382	Clec4g	C-type lectin domain family 4, member g [Source:MGI Symbol;Acc:MGI:1923113]
ENSMUSG00000117809	32.4669595453058	3.56090609478252	0.604818941348701	5.88755717015404	3.9194560985777e-09	2.40247784613164e-08	73.544125328836	37.5740684354058	68.4924699593263	7.53960666716459	0.898045903938679	6.75344097716338	Asdurf	Asnsd1 upstream reading frame [Source:MGI Symbol;Acc:MGI:5905289]
ENSMUSG00000039275	143.25027675698	3.55779355313202	0.278225970711187	12.787424351644	1.92756850556291e-37	3.41012368473484e-36	290.090716574853	215.556497866275	286.812217954679	31.4150277798525	13.9197115110495	21.707488855168	Foxk2	forkhead box K2 [Source:MGI Symbol;Acc:MGI:1916087]
ENSMUSG00000060002	216.356499702344	3.55482303963755	0.203326306571583	17.483340447076	1.91919288830839e-68	5.60305210138298e-67	353.420380052462	417.269917887927	425.93754755956	39.3735014840817	33.6767213977005	28.4609298323314	Chpt1	choline phosphotransferase 1 [Source:MGI Symbol;Acc:MGI:2384841]
ENSMUSG00000032243	26.4347380374539	3.55384377298775	0.687932074822148	5.1659806295651	2.3918156238357e-07	1.26744827071345e-06	69.4583405883451	31.6413207877101	44.9481834108079	0.418867037064699	5.38827542363207	6.75344097716338	Itga11	integrin alpha 11 [Source:MGI Symbol;Acc:MGI:2442114]
ENSMUSG00000030811	49.6176935774527	3.55103185846769	0.419844407967316	8.45797107471331	2.72069577625513e-17	2.69405201984753e-16	87.8443719205541	75.1481368708115	111.300263683905	8.37734074129399	5.38827542363207	9.64777282451911	Fbxl19	F-box and leucine-rich repeat protein 19 [Source:MGI Symbol;Acc:MGI:3039600]
ENSMUSG00000026836	3.58610057693186	3.54939687176129	2.21298700136786	1.60389413474521	0.108737389895319	0.203976910728218	2.04289237024544	17.7982429430869	0	1.6754681482588	0	0	Acvr1	activin A receptor, type 1 [Source:MGI Symbol;Acc:MGI:87911]
ENSMUSG00000066877	4.50504759268318	3.54680581373155	1.81301434419246	1.9563032278773	0.0504294441781388	0.109975626379715	2.04289237024544	7.91033019692753	14.9827278036026	2.0943351853235	0	0	Nck2	non-catalytic region of tyrosine kinase adaptor protein 2 [Source:MGI Symbol;Acc:MGI:1306821]
ENSMUSG00000030688	1614.43582879442	3.54673781120725	0.0868439612936825	40.8403504212935	0	0	2960.15104448565	2988.12723188937	2975.14166385824	247.550418905237	286.027620404469	229.616993223555	Stard10	StAR related lipid transfer domain containing 10 [Source:MGI Symbol;Acc:MGI:1860093]
ENSMUSG00000032412	412.76208316935	3.54475987497244	0.206144314963936	17.1955257441496	2.86844170051109e-66	8.1449336596476e-65	672.111589810751	711.929717723478	896.823278529929	67.0187259303519	40.4120656772405	88.2771213443499	Atp1b3	ATPase, Na+/K+ transporting, beta 3 polypeptide [Source:MGI Symbol;Acc:MGI:107788]
ENSMUSG00000057880	11.4800496555984	3.54416009072016	1.11002001720871	3.19287943980724	0.00140861743842804	0.0046309741162383	40.8578474049089	11.8654952953913	10.7019484311447	0	4.49022951969339	0.964777282451911	Abat	4-aminobutyrate aminotransferase [Source:MGI Symbol;Acc:MGI:2443582]
ENSMUSG00000056091	17.8146806056982	3.54361259001526	0.867710102427591	4.08386692756175	4.42924014382126e-05	0.000185066780158518	44.9436321453998	25.7085731400145	27.8250659209763	1.6754681482588	6.73534427954009	0	St3gal5	ST3 beta-galactoside alpha-2,3-sialyltransferase 5 [Source:MGI Symbol;Acc:MGI:1339963]
ENSMUSG00000007033	624.442085208687	3.53994712609666	0.145651108413719	24.3042923919364	1.76582432128289e-130	9.71750313442268e-129	1056.17535541689	1230.05634562223	1164.37198930855	106.811094451498	114.949875704151	74.2878507487971	Hspa1l	heat shock protein 1-like [Source:MGI Symbol;Acc:MGI:96231]
ENSMUSG00000037012	9550.37129377343	3.53698336732623	0.0518160499452513	68.2603820836092	0	0	17754.7775898032	17226.7215863589	17773.7959544452	1477.76290676426	1392.86919700889	1676.3005282602	Hk1	hexokinase 1 [Source:MGI Symbol;Acc:MGI:96103]
ENSMUSG00000004609	8.47733151921642	3.53494439691695	1.46087741457698	2.41974060358825	0.0155315819864285	0.0401509634515094	36.772062664418	7.91033019692753	2.14038968622895	0	4.04120656772405	0	Cd33	CD33 molecule [Source:MGI Symbol;Acc:MGI:99440]
ENSMUSG00000017119	2068.80798720301	3.53196065775515	0.0820399702842808	43.0517057175469	0	0	3922.35335087125	3931.43410787298	3572.31038631611	358.969050764447	334.971122169127	292.809905224155	Nbr1	NBR1, autophagy cargo receptor [Source:MGI Symbol;Acc:MGI:108498]
ENSMUSG00000041673	655.372217466377	3.52945843816168	0.164235686855498	21.4902041434335	1.92264175289291e-102	7.83996573138658e-101	1282.93640851414	1273.56316170533	1061.63328436956	94.6639503766221	78.5790165946344	140.857483237979	Lrrc18	leucine rich repeat containing 18 [Source:MGI Symbol;Acc:MGI:1914830]
ENSMUSG00000021096	617.598413670179	3.52932785435462	0.149937850547934	23.5386051050953	1.6424454097865e-122	8.30369656972141e-121	1156.27708155892	1054.05149874059	1200.75861397444	124.82237704528	92.4987281056839	77.1821825961529	Ppm1a	protein phosphatase 1A, magnesium dependent, alpha isoform [Source:MGI Symbol;Acc:MGI:99878]
ENSMUSG00000030030	2016.42946134762	3.52886793724614	0.0768780599008705	45.9021460972923	0	0	3950.95384405469	3692.14661941592	3490.97557823941	335.931363725889	304.886584387181	323.682778262616	1700003E16Rik	RIKEN cDNA 1700003E16 gene [Source:MGI Symbol;Acc:MGI:1919087]
ENSMUSG00000003123	1593.42876838413	3.5269489342509	0.102141027368027	34.5301885553086	2.82719816705184e-261	3.34874891463083e-259	3121.53954173504	2677.64677165997	2998.68595040675	289.855989648772	212.836879233467	260.00747762079	Lipe	lipase, hormone sensitive [Source:MGI Symbol;Acc:MGI:96790]
ENSMUSG00000027546	278.258933554298	3.52609518831316	0.174303655179752	20.2296112762342	5.37248017904909e-91	1.98861714246528e-89	496.422845969643	549.767948686463	490.149238146429	48.5885762995051	42.6571804370872	41.9678117866581	Atp9a	ATPase, class II, type 9A [Source:MGI Symbol;Acc:MGI:1330826]
ENSMUSG00000002733	78.2493365363584	3.52503480659314	1.50319832044481	2.34502311414907	0.0190259000715285	0.0480295134431201	87.8443719205541	162.161769037014	181.93312332946	0	13.9197115110495	23.6370434200718	Plekha3	pleckstrin homology domain-containing, family A (phosphoinositide binding specific) member 3 [Source:MGI Symbol;Acc:MGI:1932515]
ENSMUSG00000024118	1.81440372953676	3.51999392346295	2.68407264960518	1.3114376482994	0.189709946337528	0.316828602470771	4.08578474049089	5.93274764769565	0	0.418867037064699	0.449022951969339	0	Tedc2	tubulin epsilon and delta complex 2 [Source:MGI Symbol;Acc:MGI:1919266]
ENSMUSG00000031837	3.73114796937586	3.51786580508298	1.92809019132064	1.82453384230611	0.0680714048603867	0.140421970849001	10.2144618512272	3.95516509846377	6.42116905868684	0	1.79609180787736	0	Necab2	N-terminal EF-hand calcium binding protein 2 [Source:MGI Symbol;Acc:MGI:2152211]
ENSMUSG00000051375	21.3989867586233	3.51465736754742	2.14646634228514	1.63741555053023	0.101543671162868	0.19286784334951	44.9436321453998	21.7534080415507	51.3693524694947	0	10.3275278952948	0	Pcdh1	protocadherin 1 [Source:MGI Symbol;Acc:MGI:104692]
ENSMUSG00000003341	7741.24940933668	3.5086778953013	0.0482188657713145	72.7656662838515	0	0	14236.9169282405	13878.6743305094	14580.3345425916	1278.38219712146	1155.78507836908	1317.40337918808	Atp8b3	ATPase, class I, type 8B, member 3 [Source:MGI Symbol;Acc:MGI:1914581]
ENSMUSG00000042200	527.528432982067	3.50722191467068	0.139988044491108	25.0537246049855	1.59007921638563e-138	9.32821472367363e-137	888.658181056768	955.172371278999	1065.91406374202	89.6375459318457	92.9477510576532	72.8406848251193	Cdrt4	CMT1A duplicated region transcript 4 [Source:MGI Symbol;Acc:MGI:1913588]
ENSMUSG00000087279	797.842581385038	3.50078658027497	0.298530691578116	11.7267225080572	9.29899964679946e-32	1.48081509100186e-30	1523.9977082031	1536.58164075317	1337.74355389309	131.105382601251	83.9672920182665	173.659910841344	4930544D05Rik	RIKEN cDNA 4930544D05 gene [Source:MGI Symbol;Acc:MGI:2148639]
ENSMUSG00000026927	375.589449267431	3.49991761829765	0.152659259374554	22.9263369456713	2.53815303695282e-116	1.21411574309932e-114	729.312576177624	686.221144583463	654.959243986058	57.8036511149285	67.3534427954009	57.8866369471147	Entr1	endosome associated trafficking regulator 1 [Source:MGI Symbol;Acc:MGI:1915362]
ENSMUSG00000020000	7.09686673945556	3.49958902589726	1.33185584094275	2.6276034675195	0.00859886869189747	0.0236916548341003	4.08578474049089	15.8206603938551	19.2635071760605	2.5132022223882	0.898045903938679	0	Moxd1	monooxygenase, DBH-like 1 [Source:MGI Symbol;Acc:MGI:1921582]
ENSMUSG00000037972	63.3867098947754	3.4983538038599	0.404084869249277	8.65747289761001	4.82338173701397e-18	4.94138374491291e-17	91.930156661045	124.587700601609	132.704160546195	8.37734074129399	5.83729837560141	16.8836024429084	Snn	stannin [Source:MGI Symbol;Acc:MGI:1276549]
ENSMUSG00000079330	78.6441270285694	3.49754015636838	0.380220305342605	9.19872007681666	3.62238612384882e-20	4.09188158240761e-19	200.203452284054	158.206603938551	74.9136390180131	9.63394185248809	13.4706885590802	15.4364365192306	Lemd1	LEM domain containing 1 [Source:MGI Symbol;Acc:MGI:1922403]
ENSMUSG00000050379	29.0684547540497	3.49259263451067	0.742923331920943	4.70114813258057	2.58702749726201e-06	1.24999459920154e-05	51.0723092561361	77.1257194200434	32.1058452934342	11.7282770378116	0.449022951969339	1.92955456490382	Septin6	septin 6 [Source:MGI Symbol;Acc:MGI:1888939]
ENSMUSG00000074595	20.6751517346447	3.49218669906356	0.799511418706248	4.36790096721137	1.25446348489704e-05	5.63037255924376e-05	44.9436321453998	45.4843986323333	23.5442865485184	6.70187259303519	0	3.37672048858169	Wfdc6a	WAP four-disulfide core domain 6A [Source:MGI Symbol;Acc:MGI:2684968]
ENSMUSG00000041141	7.31037377192359	3.48868999786023	1.61124328286122	2.16521616255558	0.0303711351603661	0.0719336869513014	22.4718160726999	17.7982429430869	0	0	3.59218361575472	0	Pnma8a	PNMA family member 8A [Source:MGI Symbol;Acc:MGI:1918941]
ENSMUSG00000037731	4.83331030869052	3.48740906328141	1.76447319126492	1.97645908169415	0.0481028057151751	0.105698691639511	2.04289237024544	13.8430778446232	10.7019484311447	0	0	2.41194320612978	Themis2	thymocyte selection associated family member 2 [Source:MGI Symbol;Acc:MGI:2446213]
ENSMUSG00000031667	110.650247355569	3.48345357102751	0.700039944177494	4.97607829381845	6.48854112642374e-07	3.32090477322354e-06	167.517174360126	247.197818653985	194.775461446834	21.7810859273644	28.2884459740684	4.3414977710336	Aktip	AKT interacting protein [Source:MGI Symbol;Acc:MGI:3693832]
ENSMUSG00000090213	15.8828281762764	3.48168566569423	0.866214362892607	4.01942730904115	5.83397775722202e-05	0.000238910705849754	32.6862779239271	35.5964858861739	19.2635071760605	4.60753740771169	3.14316066378538	0	Peds1	plasmanylethanolamine desaturase 1 [Source:MGI Symbol;Acc:MGI:2142624]
ENSMUSG00000029577	427.936322003239	3.47493068060004	0.158478344438515	21.9268486991811	1.4406587781596e-106	6.11517857473412e-105	747.698607509833	796.965767340449	811.207691080771	81.6790722276164	54.3317771882901	75.735016672475	Ube3b	ubiquitin protein ligase E3B [Source:MGI Symbol;Acc:MGI:1891295]
ENSMUSG00000046196	668.876741756087	3.4740928882013	0.137935122821527	25.1864269022792	5.64176039371347e-140	3.33555351348681e-138	1266.59326955218	1239.94425836839	1175.07393773969	115.607302229857	85.3143608741745	130.727321772234	Ttc39d	tetratricopeptide repeat domain 39D [Source:MGI Symbol;Acc:MGI:1914987]
ENSMUSG00000026751	13.2733736741905	3.47192800345571	1.03086980068758	3.36795975703233	0.000757266487640098	0.00261978395181638	24.5147084429453	35.5964858861739	12.8423381173737	0	0.898045903938679	5.78866369471147	Nr5a1	nuclear receptor subfamily 5, group A, member 1 [Source:MGI Symbol;Acc:MGI:1346833]
ENSMUSG00000055485	19.5836128521933	3.46936118818393	0.84626487289344	4.09961620682888	4.13835837873983e-05	0.000173412274785671	34.7291702941726	23.7309905907826	49.2289627832658	2.0943351853235	0	7.71821825961529	Mtcl2	microtubule crosslinking factor 2 [Source:MGI Symbol;Acc:MGI:2444575]
ENSMUSG00000060671	23.1412136529993	3.46203332058953	2.16188965146051	1.60139224416504	0.10929006947805	0.204828299291518	38.8149550346634	43.5068160831014	44.9481834108079	0	0	11.5773273894229	Atp8b2	ATPase, class I, type 8B, member 2 [Source:MGI Symbol;Acc:MGI:1859660]
ENSMUSG00000025551	18.2711098110785	3.45808890488815	2.19982638722642	1.5719826459797	0.115954575933023	0.214907963727919	20.4289237024544	15.8206603938551	64.2116905868684	0	0	9.16538418329315	Fgf14	fibroblast growth factor 14 [Source:MGI Symbol;Acc:MGI:109189]
ENSMUSG00000000411	691.175257599301	3.45736605322578	0.127838392222325	27.0448180168994	4.39496629348131e-161	2.95460517794741e-159	1168.53443578039	1400.12844485617	1232.86445926787	130.686515564186	114.500852752182	100.336837374999	Tssk3	testis-specific serine kinase 3 [Source:MGI Symbol;Acc:MGI:1929914]
ENSMUSG00000062300	110.933169522556	3.45537686834114	0.314349275195199	10.9921578988706	4.16839008017e-28	6.12069273046922e-27	196.117667543563	249.175401203217	164.810005839629	26.3886233350761	10.7765508472641	18.3307683665863	Nectin2	nectin cell adhesion molecule 2 [Source:MGI Symbol;Acc:MGI:97822]
ENSMUSG00000049076	8.0878297496947	3.45292793473253	1.29010235031087	2.67647596634522	0.00744009016596321	0.0209018299964049	14.3002465917181	23.7309905907826	6.42116905868684	0	3.59218361575472	0.482388641225955	Acap2	ArfGAP with coiled-coil, ankyrin repeat and PH domains 2 [Source:MGI Symbol;Acc:MGI:1925868]
ENSMUSG00000020431	4.46104045858266	3.4467637284992	1.89803096760695	1.81596812029094	0.0693752625561724	0.142638475849085	24.5147084429453	0	0	0.837734074129399	0.449022951969339	0.964777282451911	Adcy1	adenylate cyclase 1 [Source:MGI Symbol;Acc:MGI:99677]
ENSMUSG00000056508	731.688292276981	3.44260304030696	0.146498432661186	23.4992482702449	4.15155998340222e-122	2.09040289528637e-120	1129.71948074573	1443.63526093927	1446.90342789077	103.460158154981	154.014872525483	112.396553405648	1700001K19Rik	RIKEN cDNA 1700001K19 gene [Source:MGI Symbol;Acc:MGI:1913573]
ENSMUSG00000110622	2680.86589765108	3.44085519597738	0.0616831701417613	55.7827230356278	0	0	4845.74070222219	4878.69614895505	5004.23108640328	450.282064844552	443.634676545707	462.610706935691	Iqcn	IQ motif containing N [Source:MGI Symbol;Acc:MGI:3708784]
ENSMUSG00000092586	33.4382015928684	3.43822696501874	0.722566564379355	4.75835325700684	1.9517870505178e-06	9.53057540137019e-06	55.158093996627	79.1033019692753	49.2289627832658	0.837734074129399	1.34706885590802	14.9540478780046	Ly6g6c	lymphocyte antigen 6 family member G6C [Source:MGI Symbol;Acc:MGI:2148930]
ENSMUSG00000090202	11.7107338016976	3.43423329356288	1.18555047724523	2.89674152174669	0.00377060279126239	0.0114224819176658	20.4289237024544	11.8654952953913	32.1058452934342	5.86413851890579	0	0	4930503B20Rik	RIKEN cDNA 4930503B20 gene [Source:MGI Symbol;Acc:MGI:1922264]
ENSMUSG00000070972	10.0247619370231	3.43334753764604	1.23523413611357	2.77951154138956	0.00544407189255057	0.0158307042617843	18.386031332209	21.7534080415507	14.9827278036026	5.02640444477639	0	0	Dnajc25	DnaJ heat shock protein family (Hsp40) member C25 [Source:MGI Symbol;Acc:MGI:1919679]
ENSMUSG00000040447	8.82182053089805	3.43326648045906	1.36189219123203	2.52095320214235	0.0117037416220878	0.0313435474922279	20.4289237024544	23.7309905907826	4.28077937245789	0	4.49022951969339	0	Spns2	SPNS lysolipid transporter 2, sphingosine-1-phosphate [Source:MGI Symbol;Acc:MGI:2384936]
ENSMUSG00000041399	967.744721525458	3.43087017144284	0.111495055201611	30.7715007202693	6.30685678908836e-208	5.56300552382212e-206	1930.53328988194	1811.4656150964	1571.04602969205	149.116665195033	163.893377468809	180.413351818507	1700013G24Rik	RIKEN cDNA 1700013G24 gene [Source:MGI Symbol;Acc:MGI:1916630]
ENSMUSG00000028277	872.466794838191	3.42991732258885	0.103969736884711	32.9895739410419	1.14609217947843e-238	1.2287886582908e-236	1579.15580219973	1556.35746624549	1654.52122745498	136.969521120157	155.361941381391	152.434810627402	Ube2j1	ubiquitin-conjugating enzyme E2J 1 [Source:MGI Symbol;Acc:MGI:1926245]
ENSMUSG00000034037	3.32717788890177	3.42565423854189	2.05000442818219	1.67104723845867	0.0947123476054443	0.181948944573511	10.2144618512272	5.93274764769565	2.14038968622895	1.6754681482588	0	0	Fgd5	FYVE, RhoGEF and PH domain containing 5 [Source:MGI Symbol;Acc:MGI:2443369]
ENSMUSG00000052949	21.6788289625564	3.42489508276805	0.864734470996632	3.96063207567146	7.47516337089805e-05	0.000301064141333741	49.0294168858907	61.3050590261884	8.56155874491579	0	5.38827542363207	5.78866369471147	Rnf157	ring finger protein 157 [Source:MGI Symbol;Acc:MGI:2442484]
ENSMUSG00000071322	57.2936863162654	3.4233575331147	0.508919295628739	6.7267198601408	1.73530368772502e-11	1.25403672075747e-10	130.745111695708	110.744622756985	72.7732493317842	7.95847370422929	2.2451147598467	19.2955456490382	Tcp10a	t-complex protein 10a [Source:MGI Symbol;Acc:MGI:98541]
ENSMUSG00000037664	54.607034022084	3.42285320479488	0.546055532328015	6.26832437756307	3.64953920160662e-10	2.42464311166568e-09	138.91668117669	102.834292560058	57.7905215281816	1.2566011111941	15.2667803669575	11.5773273894229	Cdkn1c	cyclin dependent kinase inhibitor 1C [Source:MGI Symbol;Acc:MGI:104564]
ENSMUSG00000021262	32.8513796316313	3.42019795394955	0.735069802287133	4.65288866895058	3.27316990992256e-06	1.56390373298913e-05	73.544125328836	27.6861556892464	79.194418390471	13.8226122231351	0.449022951969339	2.41194320612978	Evl	Ena-vasodilator stimulated phosphoprotein [Source:MGI Symbol;Acc:MGI:1194884]
ENSMUSG00000054523	190.334736142994	3.42001663764225	0.230562574230471	14.8333555394103	8.9162216142761e-50	1.98729477090953e-48	314.605425017798	421.225082986391	308.216114816968	26.8074903721408	29.1864918780071	41.9678117866581	Ms4a5	membrane-spanning 4-domains, subfamily A, member 5 [Source:MGI Symbol;Acc:MGI:2670985]
ENSMUSG00000079037	13.0108443883873	3.41937335192322	0.996454272460662	3.43154066014425	0.00060016315396431	0.00211331516020785	42.9007397751543	17.7982429430869	10.7019484311447	3.76980333358229	0	2.89433184735573	Prnp	prion protein [Source:MGI Symbol;Acc:MGI:97769]
ENSMUSG00000048175	199.730608631384	3.41853029704055	0.205833803807309	16.6082063966558	6.07835754531041e-62	1.63628858855034e-60	316.648317388044	389.583762198681	389.550922893668	33.5093629651759	30.9825836858844	38.1087026568505	Asb8	ankyrin repeat and SOCS box-containing 8 [Source:MGI Symbol;Acc:MGI:1925791]
ENSMUSG00000044526	1979.43845379759	3.41632353311767	0.0857311787745212	39.8492541681112	0	0	3409.58736593965	3850.35322335448	3600.13545223709	343.470970393053	374.485141942429	298.598568918866	Znrf4	zinc and ring finger 4 [Source:MGI Symbol;Acc:MGI:1341258]
ENSMUSG00000033735	3.68271735870506	3.41249345033558	1.99371894820501	1.71162211875848	0.0869663294227372	0.170734055095593	2.04289237024544	13.8430778446232	4.28077937245789	0	0	1.92955456490382	Spr	sepiapterin reductase [Source:MGI Symbol;Acc:MGI:103078]
ENSMUSG00000046886	152.213715384395	3.41195536942012	0.279395561703159	12.2119168558773	2.68488054413314e-34	4.48212876877636e-33	302.348070796326	266.973644146304	265.408321092389	15.9169474084586	39.9630427252712	22.6722661376199	Zfp474	zinc finger protein 474 [Source:MGI Symbol;Acc:MGI:1914008]
ENSMUSG00001074846	1709.65560068864	3.40940254395877	0.0933574279711803	36.5198851130653	5.36258515387551e-292	7.02047069039471e-290	2974.45129107737	3454.8367135081	2945.17620825103	271.84470705499	279.741299076898	331.883385163457	Iqcf3	IQ motif containing F3 [Source:MGI Symbol;Acc:MGI:1915515]
ENSMUSG00000026269	180.430936050668	3.40446914472715	0.21119868348748	16.1197460538572	1.85369426648597e-58	4.7930136366499e-57	339.120133460744	320.368372975565	329.620011679258	32.2527618539819	26.492354166191	34.7319821682688	Rnpepl1	arginyl aminopeptidase (aminopeptidase B)-like 1 [Source:MGI Symbol;Acc:MGI:1914170]
ENSMUSG00000054362	159.111173581088	3.40296250797771	0.237469752804831	14.3300882229599	1.41940177171705e-46	2.97691396877654e-45	322.77699449878	243.242653555522	306.075725130739	21.7810859273644	32.3296525417924	28.4609298323314	Cimap2	ciliary microtubule associated protein 2 [Source:MGI Symbol;Acc:MGI:2681853]
ENSMUSG00000028018	204.995523882525	3.40161815013509	0.204906737844921	16.6008115980526	6.87549536596075e-62	1.84687982432946e-60	388.149550346634	350.032111214043	385.27014352121	28.4829585203996	40.4120656772405	37.6263140156245	Gstcd	glutathione S-transferase, C-terminal domain containing [Source:MGI Symbol;Acc:MGI:1914803]
ENSMUSG00000031428	4.08316196247708	3.40013535474611	2.03602435690181	1.66998756337082	0.0949218242302385	0.182266902570863	0	13.8430778446232	8.56155874491579	2.0943351853235	0	0	Zcchc18	zinc finger, CCHC domain containing 18 [Source:MGI Symbol;Acc:MGI:1914245]
ENSMUSG00000021366	117.30680641195	3.39776382673907	0.615375351392169	5.52144933828155	3.36214758356542e-08	1.91110738102391e-07	312.562532647553	227.421993161666	102.738704938989	12.566011111941	15.2667803669575	33.2848162445909	Hivep1	human immunodeficiency virus type I enhancer binding protein 1 [Source:MGI Symbol;Acc:MGI:96100]
ENSMUSG00000070304	3.24561851522429	3.39651993178425	2.49593432388481	1.36082103574653	0.173570252508222	0.295347274653818	0	17.7982429430869	0	1.6754681482588	0	0	Scn2b	sodium channel, voltage-gated, type II, beta [Source:MGI Symbol;Acc:MGI:106921]
ENSMUSG00000061411	222.555428072948	3.39625243201922	0.197924775084506	17.1593092909625	5.35466626681939e-66	1.51354509910075e-64	451.479213824243	365.852771607898	402.393261011042	40.6301025952758	42.6571804370872	32.320038962139	Nol4l	nucleolar protein 4-like [Source:MGI Symbol;Acc:MGI:1918765]
ENSMUSG00000004035	38.7931657082783	3.39539350141704	1.40720831434347	2.41285776015411	0.0158279951978137	0.0408492999118508	112.359080363499	57.3498939277246	42.8077937245789	0	6.73534427954009	13.5068819543268	Gstm7	glutathione S-transferase, mu 7 [Source:MGI Symbol;Acc:MGI:1915562]
ENSMUSG00000037625	24.2781593702754	3.39539089769375	0.775011261894111	4.38108588176575	1.18089310817678e-05	5.31743938681921e-05	49.0294168858907	47.4619811815652	36.3866246658921	0	3.14316066378538	9.64777282451911	Cldn11	claudin 11 [Source:MGI Symbol;Acc:MGI:106925]
ENSMUSG00000027333	6.38868967976958	3.39533256708561	1.51385627318776	2.24283680506603	0.0249073401272821	0.0606802329408439	16.3431389619636	7.91033019692753	10.7019484311447	0	0	3.37672048858169	Smox	spermine oxidase [Source:MGI Symbol;Acc:MGI:2445356]
ENSMUSG00000032827	30.0110584456582	3.39208717384378	0.706345296900526	4.80230729747675	1.56847738118174e-06	7.72866608152031e-06	55.158093996627	77.1257194200434	32.1058452934342	7.95847370422929	0	7.71821825961529	Ppp1r9a	protein phosphatase 1, regulatory subunit 9A [Source:MGI Symbol;Acc:MGI:2442401]
ENSMUSG00000028261	6.37228432192672	3.39177634212218	1.51079776610407	2.2450234030122	0.0247666302080143	0.0604202785204146	8.17156948098178	13.8430778446232	12.8423381173737	0	0	3.37672048858169	Ndufaf4	NADH:ubiquinone oxidoreductase complex assembly factor 4 [Source:MGI Symbol;Acc:MGI:1915743]
ENSMUSG00000028416	2054.4025103003	3.39032918900826	0.070087298785889	48.3729469923708	0	0	3856.9807950234	3624.90881274204	3771.3666271354	352.267178171412	367.30077471092	353.590874018625	Bag1	BCL2-associated athanogene 1 [Source:MGI Symbol;Acc:MGI:108047]
ENSMUSG00000033885	204.625136883106	3.38990874718727	0.265087399283702	12.7878909233227	1.91603310038321e-37	3.39454468226011e-36	351.377487682216	355.964858861739	413.095209442187	29.320692594529	21.5531016945283	56.4394710234368	Pxk	PX domain containing serine/threonine kinase [Source:MGI Symbol;Acc:MGI:1289230]
ENSMUSG00000071076	63.1701096636185	3.38436717590245	0.496912283367972	6.81079395535141	9.70615649434257e-12	7.14328581356572e-11	124.616434584972	146.341108643159	74.9136390180131	15.9169474084586	1.79609180787736	15.4364365192306	Jund	jun D proto-oncogene [Source:MGI Symbol;Acc:MGI:96648]
ENSMUSG00000023153	5.1122866966811	3.37991491962995	1.7646031082838	1.91539667121926	0.0554419353506043	0.118925724380039	4.08578474049089	21.7534080415507	2.14038968622895	0	2.69413771181604	0	Tmem52	transmembrane protein 52 [Source:MGI Symbol;Acc:MGI:1916921]
ENSMUSG00000024571	3.41243584800614	3.37631159430065	2.2031425147279	1.53249804392143	0.125399579927525	0.228411625008586	12.2573542214727	0	6.42116905868684	0	1.79609180787736	0	Naa12	N(alpha)-acetyltransferase 12, NatA catalytic subunit [Source:MGI Symbol;Acc:MGI:3833940]
ENSMUSG00000036206	5.96037651742526	3.37593630118281	1.55024588166823	2.17767796780079	0.0294300203194636	0.0699849259489806	10.2144618512272	13.8430778446232	8.56155874491579	0	3.14316066378538	0	Sh3bp4	SH3-domain binding protein 4 [Source:MGI Symbol;Acc:MGI:2138297]
ENSMUSG00000020593	2100.95441932154	3.37466031125806	0.10555602436001	31.9703241166835	2.81982075038923e-224	2.85122850996673e-222	3750.75039177064	3862.21871864987	3884.80728050554	438.972654843805	286.925666308408	382.051803850957	Lpin1	lipin 1 [Source:MGI Symbol;Acc:MGI:1891340]
ENSMUSG00000022817	11.7125835985578	3.37426167080538	1.00252348107428	3.3657682184058	0.00076330817480663	0.002637750422359	22.4718160726999	13.8430778446232	27.8250659209763	2.0943351853235	4.04120656772405	0	Itgb5	integrin beta 5 [Source:MGI Symbol;Acc:MGI:96614]
ENSMUSG00000029321	3.40691546033221	3.37356634511306	2.00171009498344	1.68534212499986	0.091922582764491	0.177770356374121	6.12867711073633	3.95516509846377	8.56155874491579	0	1.79609180787736	0	Slc10a6	solute carrier family 10 (sodium/bile acid cotransporter family), member 6 [Source:MGI Symbol;Acc:MGI:1923000]
ENSMUSG00000031543	2.70581651588558	3.37025676269706	2.44147663970697	1.38041737032616	0.167458174941462	0.287689962226298	4.08578474049089	0	10.7019484311447	0	0	1.44716592367787	Ank1	ankyrin 1, erythroid [Source:MGI Symbol;Acc:MGI:88024]
ENSMUSG00000037813	26.3222114446999	3.3678315363988	0.592929128362953	5.67999002797723	1.34702595191698e-08	7.89117369947783e-08	61.2867711073633	35.5964858861739	47.0885730970368	5.44527148184109	2.2451147598467	6.27105233593742	D630003M21Rik	RIKEN cDNA D630003M21 gene [Source:MGI Symbol;Acc:MGI:3606579]
ENSMUSG00000002058	37.9534155779303	3.36647619487728	0.59419257024205	5.66563158725783	1.46483958161577e-08	8.56118885176474e-08	49.0294168858907	77.1257194200434	81.3348	0.837734074129399	11.6745967512028	7.71821825961529	Unc119	unc-119 lipid binding chaperone [Source:MGI Symbol;Acc:MGI:1328357]
ENSMUSG00000093668	101.676334309245	3.36432009714821	0.308883756484715	10.8919	1.26032861083536e-27	1.83329905648647e-26	132.788004065954	239.287488457058	184.073513015689	18.8490166679115	21.5531016945283	13.5068819543268	Pou5f2	POU domain class 5, transcription factor 2 [Source:MGI Symbol;Acc:MGI:1922757]
ENSMUSG00000019578	1671.79103919704	3.36085518264299	0.0804384007001719	41.7817255612817	0	0	2943.80790552368	3065.25295130942	3131.39011095295	291.112590759966	278.39423022099	320.78844641526	Ubxn6	UBX domain protein 6 [Source:MGI Symbol;Acc:MGI:1913780]
ENSMUSG00000062944	25.8848012206698	3.36043383860635	0.67428184667969	4.98372283808894	6.23724057197731e-07	3.20415369655852e-06	14.3002465917181	39.5516509846377	87.7559771353868	6.28300555597049	4.04120656772405	3.37672048858169	9130023H24Rik	RIKEN cDNA 9130023H24 gene [Source:MGI Symbol;Acc:MGI:2442738]
ENSMUSG00000062859	8566.24517794873	3.35844361110571	0.0419035281894614	80.1470366867662	0	0	15638.3410942289	15559.6194973565	15635.5466579025	1583.73626714163	1544.63895477453	1435.58859628844	Tcp11	t-complex protein 11 [Source:MGI Symbol;Acc:MGI:98544]
ENSMUSG00000022215	11.2743969885695	3.35793008302342	1.01881820564957	3.29590702679141	0.000981044761038176	0.00331645928051965	14.3002465917181	23.7309905907826	23.5442865485184	0	2.69413771181604	3.37672048858169	Fitm1	fat storage-inducing transmembrane protein 1 [Source:MGI Symbol;Acc:MGI:1915930]
ENSMUSG00000025494	21.1521583665213	3.3568864811996	0.787088773080037	4.26494011350641	1.99955826796807e-05	8.74112695209802e-05	32.6862779239271	57.3498939277246	25.6846762347474	6.70187259303519	4.49022951969339	0	Sigirr	single immunoglobulin and toll-interleukin 1 receptor (TIR) domain [Source:MGI Symbol;Acc:MGI:1344402]
ENSMUSG00000024207	882.003595851667	3.3495405696857	0.119128128236227	28.117125814683	6.04960516659246e-174	4.45200825188819e-172	1409.59573546936	1580.08845683627	1830.03318172575	161.682676306974	169.281652892441	141.339871879205	Acsbg2	acyl-CoA synthetase bubblegum family member 2 [Source:MGI Symbol;Acc:MGI:3587728]
ENSMUSG00000003031	29.4435474088527	3.34828340418722	1.31244266675353	2.55118451190677	0.0107357472648506	0.0290261932028145	77.6299100693269	55.3723113784927	27.8250659209763	0	7.63339018347877	8.20060690084124	Cdkn1b	cyclin dependent kinase inhibitor 1B [Source:MGI Symbol;Acc:MGI:104565]
ENSMUSG00000078439	4092.8251287304	3.34311773968135	0.0534732245314264	62.5194715481686	0	0	7599.55961731305	7491.08269649037	7262.34220537482	708.304159676407	730.111319902146	765.550773625591	Smim24	small integral membrane protein 24 [Source:MGI Symbol;Acc:MGI:1919523]
ENSMUSG00000036087	528.285515405114	3.34112363587118	0.140165598468369	23.8369733542369	1.38224057304054e-125	7.31528766251286e-124	998.974369050022	1016.47743030519	868.998212608952	80.0036040793576	100.581141241132	104.678335146032	Slain2	SLAIN motif family, member 2 [Source:MGI Symbol;Acc:MGI:1923241]
ENSMUSG00000027015	4.41142467848442	3.34028709190071	2.0150009626598	1.65770992361787	0.097376029857182	0.186289137568647	0	19.7758254923188	4.28077937245789	0	0	2.41194320612978	Cybrd1	cytochrome b reductase 1 [Source:MGI Symbol;Acc:MGI:2654575]
ENSMUSG00000030246	63.8907814244717	3.3377778026552	1.40681483580967	2.37257790982435	0.017664437302906	0.0449452959771361	126.659326955218	108.767040207754	113.440653370134	13.8226122231351	20.6550557905896	0	Ldhb	lactate dehydrogenase B [Source:MGI Symbol;Acc:MGI:96763]
ENSMUSG00000072553	4.9997657878052	3.33694005062885	1.7412421533456	1.91641354662663	0.0553124778757365	0.118676837478752	4.08578474049089	3.95516509846377	19.2635071760605	0	2.69413771181604	0	Gm525	predicted gene 525 [Source:MGI Symbol;Acc:MGI:2685371]
ENSMUSG00000032892	25.2260753778714	3.33668977129434	1.41328010655248	2.36095431883901	0.0182279758001178	0.0462184169268227	71.5012329585905	53.3947288292608	12.8423381173737	4.18867037064699	9.42948199135613	0	Rangrf	RAN guanine nucleotide release factor [Source:MGI Symbol;Acc:MGI:1889073]
ENSMUSG00000004032	5869.61656179932	3.33616357679253	0.0488744141054104	68.2599195889535	0	0	10584.2253702416	10690.8112611476	10768.3005114178	989.36394154682	1100.10623232488	1084.89205411717	Gstm5	glutathione S-transferase, mu 5 [Source:MGI Symbol;Acc:MGI:1309466]
ENSMUSG00000003348	7.7611552629488	3.33428445308946	2.96403265646388	1.12491488439513	0.260625104018203	0.400899978337009	26.5576008131908	15.8206603938551	0	4.18867037064699	0	0	Mob3a	MOB kinase activator 3A [Source:MGI Symbol;Acc:MGI:3050117]
ENSMUSG00000061451	28.0123158031386	3.33422693043882	0.656499784444354	5.07879364082478	3.79839006647211e-07	1.9840645634907e-06	32.6862779239271	75.1481368708115	44.9481834108079	0.837734074129399	6.73534427954009	7.71821825961529	Tmem151a	transmembrane protein 151A [Source:MGI Symbol;Acc:MGI:2147713]
ENSMUSG00000055745	15.5838036336923	3.33006253748794	0.839360078154439	3.96738256221333	7.26662988779611e-05	0.000293140045133053	46.9865245156452	31.6413207877101	6.42116905868684	2.9320692594529	3.59218361575472	1.92955456490382	Rtl6	retrotransposon Gag like 6 [Source:MGI Symbol;Acc:MGI:2675858]
ENSMUSG00000022615	1.5665488031742	3.32910035703028	3.36664354711484	0.988848480820985	0.322737280191709	NA	0	0	8.56155874491579	0.837734074129399	0	0	Tymp	thymidine phosphorylase [Source:MGI Symbol;Acc:MGI:1920212]
ENSMUSG00000031661	1.5665488031742	3.32910035703028	3.36664354711484	0.988848480820985	0.322737280191709	NA	0	0	8.56155874491579	0.837734074129399	0	0	Nkd1	naked cuticle 1 [Source:MGI Symbol;Acc:MGI:2135954]
ENSMUSG00000025903	79.2980037084025	3.32809894346377	0.379283379044115	8.77470284052883	1.71355745664184e-18	1.78638005769108e-17	149.131143027917	170.072099233942	113.440653370134	18.0112825937821	5.83729837560141	19.2955456490382	Lypla1	lysophospholipase 1 [Source:MGI Symbol;Acc:MGI:1344588]
ENSMUSG00000026572	8.58213754717978	3.32706023415005	1.3414426279189	2.48021060677907	0.0131304801491492	0.0347140686900175	8.17156948098178	23.7309905907826	14.9827278036026	4.60753740771169	0	0	Tbx19	T-box 19 [Source:MGI Symbol;Acc:MGI:1891158]
ENSMUSG00000030761	183.25401864168	3.32605171337212	0.236534887273623	14.0615693173606	6.54192488892022e-45	1.32944313469773e-43	281.919147093871	375.740684354058	342.462349796632	37.6980333358229	39.5140197733019	22.189877496394	Myo7a	myosin VIIA [Source:MGI Symbol;Acc:MGI:104510]
ENSMUSG00000029828	1073.13536745174	3.32460540312796	0.0967913363697661	34.3481713118121	1.49980006881732e-258	1.72713087554453e-256	2053.10683209667	1945.94122844417	1855.7178579605	209.852385569414	183.65038735546	190.543513284252	Spmip4	sperm microtubule inner protein 4 [Source:MGI Symbol;Acc:MGI:1918071]
ENSMUSG00000042688	691.262874369589	3.31637037736708	0.126974928980163	26.1183085826744	2.25884552918862e-150	1.42605390083852e-148	1380.99524228592	1249.83217111455	1138.6873130738	129.429914452992	140.095161014434	108.53744427584	Mapk6	mitogen-activated protein kinase 6 [Source:MGI Symbol;Acc:MGI:1354946]
ENSMUSG00000052549	67.1915312232221	3.30842452452322	0.401091110071463	8.24856109110408	1.60313059965799e-16	1.52432226819163e-15	67.4154482180997	114.699787855449	184.073513015689	9.63394185248809	15.2667803669575	12.0597160306489	Arl13a	ADP-ribosylation factor-like 13A [Source:MGI Symbol;Acc:MGI:1921698]
ENSMUSG00000031452	1637.83194478014	3.30806953881717	0.0960971492902806	34.4242213556668	1.09487176336608e-259	1.28461510575321e-257	2858.00642597338	2980.21690169245	3088.58231722837	352.267178171412	267.168656421757	280.750189193506	1700029H14Rik	RIKEN cDNA 1700029H14 gene [Source:MGI Symbol;Acc:MGI:1913751]
ENSMUSG00000024513	522.488344093625	3.30657245450127	0.128272803313968	25.7776579997859	1.57901115724049e-146	9.72186225871286e-145	939.730490312904	905.732807548202	1001.70237315515	96.7582855619455	91.1516592497759	99.8544487337728	Mbd2	methyl-CpG binding domain protein 2 [Source:MGI Symbol;Acc:MGI:1333813]
ENSMUSG00000107002	29.5431207861375	3.3055116235084	1.31113632041793	2.5211044588062	0.011698711754673	0.0313368249176971	73.544125328836	29.6637382384782	57.7905215281816	10.4716759266175	0	5.78866369471147	Ncbp2as2	Ncbp2 antisense 2 (head to head) [Source:MGI Symbol;Acc:MGI:1913301]
ENSMUSG00000022558	530.931162871269	3.30439867836758	0.126910210681694	26.0372956645342	1.87386872119685e-149	1.17703562048107e-147	939.730490312904	1028.34292560058	924.648344450905	98.4337537102043	96.9889576253773	97.442505527643	Mroh1	maestro heat-like repeat family member 1 [Source:MGI Symbol;Acc:MGI:2442558]
ENSMUSG00000078611	197.639625642808	3.30394039680283	0.236895748721694	13.9468116867066	3.28986696010183e-44	6.56758834394647e-43	314.605425017798	381.673432001753	380.989364148753	49.4263103736345	35.0237902536085	24.1194320612978	Gm5901	predicted gene 5901 [Source:MGI Symbol;Acc:MGI:3643909]
ENSMUSG00000024317	1291.87567812754	3.29954340398858	0.10561148522715	31.2422782133203	2.84240471625549e-214	2.71930672738996e-212	2310.5112707476	2404.74037986597	2322.32280955841	263.467366313696	257.739174430401	192.473067849156	Rnf138	ring finger protein 138 [Source:MGI Symbol;Acc:MGI:1929211]
ENSMUSG00000074064	10.8747892747736	3.29236003411576	1.12362374445414	2.93012678876344	0.0033882372594381	0.0103766330449721	40.8578474049089	11.8654952953913	6.42116905868684	0	2.2451147598467	3.85910912980764	Mlycd	malonyl-CoA decarboxylase [Source:MGI Symbol;Acc:MGI:1928485]
ENSMUSG00000036432	149.239198571328	3.29171421872616	0.232129071849835	14.1805340989584	1.20922708458538e-45	2.47762063442971e-44	304.390963166571	276.861556892464	231.162086112726	28.4829585203996	25.5943082622523	28.9433184735573	Siah2	siah E3 ubiquitin protein ligase 2 [Source:MGI Symbol;Acc:MGI:108062]
ENSMUSG00000073027	10.4950284047065	3.2912773049874	1.23518898448108	2.66459411987884	0.0077081293061982	0.021523575253971	24.5147084429453	19.7758254923188	12.8423381173737	0	5.83729837560141	0	Dmrtc1b	DMRT-like family C1b [Source:MGI Symbol;Acc:MGI:3639121]
ENSMUSG00000031545	1812.9984775772	3.28822636774657	0.0878847948651499	37.4151907937205	2.2126838225165e-306	3.09203917984693e-304	3235.94151446878	3381.66615918652	3251.25193338177	387.033142247782	307.580722098997	314.517394079323	Gpat4	glycerol-3-phosphate acyltransferase 4 [Source:MGI Symbol;Acc:MGI:2142716]
ENSMUSG00000020614	24.2741149273083	3.2866849525516	1.66009291272492	1.97981988077809	0.0477237716199818	0.104977104286826	71.5012329585905	17.7982429430869	42.8077937245789	0	12.5726426551415	0.964777282451911	Fam20a	FAM20A, golgi associated secretory pathway pseudokinase [Source:MGI Symbol;Acc:MGI:2388266]
ENSMUSG00000051113	754.660350936024	3.2854252253243	0.121371559090183	27.0691523611651	2.27310999564379e-161	1.53644940303379e-159	1505.61167687089	1326.95789053459	1273.53186330622	124.82237704528	137.850046254587	159.188251604565	Garin5a	golgi associated RAB2 interactor 5A [Source:MGI Symbol;Acc:MGI:1922788]
ENSMUSG00000028750	13.4926092020697	3.28439797036766	0.974849468501003	3.36913346777322	0.00075404906156713	0.00260937901466622	34.7291702941726	23.7309905907826	14.9827278036026	1.6754681482588	5.83729837560141	0	Pla2g2c	phospholipase A2, group IIC [Source:MGI Symbol;Acc:MGI:106638]
ENSMUSG00000041132	6.08177394054082	3.28274826990366	1.55078507623348	2.11682993356935	0.0342742839118239	0.0794398288758017	6.12867711073633	9.88791274615941	17.1231174898316	3.35093629651759	0	0	N4bp2l1	NEDD4 binding protein 2-like 1 [Source:MGI Symbol;Acc:MGI:2140872]
ENSMUSG00000042766	59.9268018425149	3.27915860210932	0.498445474065038	6.5787709443249	4.74352854936478e-11	3.32367687709576e-10	89.8872642907995	92.9463798138985	143.406108977339	19.2678837049762	12.1236197031722	1.92955456490382	Trim46	tripartite motif-containing 46 [Source:MGI Symbol;Acc:MGI:2673000]
ENSMUSG00000062661	3.79174016911915	3.27902548965312	1.94650994529872	1.68456652254603	0.0920722348610581	0.177967710165072	12.2573542214727	1.97758254923188	6.42116905868684	2.0943351853235	0	0	Ncs1	neuronal calcium sensor 1 [Source:MGI Symbol;Acc:MGI:109166]
ENSMUSG00000044813	56.7932860715004	3.27556383671012	0.471285783876012	6.95027083093996	3.64585604446445e-12	2.75812114507326e-11	108.273295623009	57.3498939277246	143.406108977339	17.5924155567174	4.49022951969339	9.64777282451911	Shb	src homology 2 domain-containing transforming protein B [Source:MGI Symbol;Acc:MGI:98294]
ENSMUSG00000053746	14.2055439346421	3.27353705672516	2.10620969856772	1.55423130894861	0.120129251822946	0.22032860984896	16.3431389619636	13.8430778446232	47.0885730970368	7.95847370422929	0	0	Ptrh1	peptidyl-tRNA hydrolase 1 homolog [Source:MGI Symbol;Acc:MGI:1913779]
ENSMUSG00000021185	1.50155059251853	3.26875475023773	3.42205762048741	0.955201552033525	0.339475781109899	NA	8.17156948098178	0	0	0.837734074129399	0	0	Dglucy	D-glutamate cyclase [Source:MGI Symbol;Acc:MGI:2444813]
ENSMUSG00000023990	1.50155059251853	3.26875475023773	3.42205762048741	0.955201552033525	0.339475781109899	NA	8.17156948098178	0	0	0.837734074129399	0	0	Tfeb	transcription factor EB [Source:MGI Symbol;Acc:MGI:103270]
ENSMUSG00000036599	1.50155059251853	3.26875475023773	3.42205762048741	0.955201552033525	0.339475781109899	NA	8.17156948098178	0	0	0.837734074129399	0	0	Chst12	carbohydrate sulfotransferase 12 [Source:MGI Symbol;Acc:MGI:1929064]
ENSMUSG00000013698	5.25527126863591	3.26575157605602	1.6820066708256	1.9415806326458	0.052187889362745	0.113234609212222	18.386031332209	5.93274764769565	4.28077937245789	2.9320692594529	0	0	Pea15a	proliferation and apoptosis adaptor protein 15A [Source:MGI Symbol;Acc:MGI:104799]
ENSMUSG00000035696	1062.35803110682	3.26197928591616	0.258301039927539	12.6285952500665	1.46876858305092e-36	2.55126743958161e-35	1944.83353647366	1991.42562707651	1836.45435078444	237.497610015685	230.79779731224	133.139264978364	Rnf38	ring finger protein 38 [Source:MGI Symbol;Acc:MGI:1920719]
ENSMUSG00000056509	2152.44568349918	3.26121648710702	0.0784346513557532	41.5787720189543	0	0	3887.62418057708	3656.55013352975	4150.21560159793	369.85959372813	428.816919130719	421.607672431485	Misfa	mitochondrial sheath formation associated [Source:MGI Symbol;Acc:MGI:3642801]
ENSMUSG00000052852	15.5463637848686	3.2611244184553	0.824561515572045	3.95498014019351	7.65410096084095e-05	0.000307872101067202	36.772062664418	17.7982429430869	29.9654556072053	3.76980333358229	4.49022951969339	0.482388641225955	Reep1	receptor accessory protein 1 [Source:MGI Symbol;Acc:MGI:1098827]
ENSMUSG00000036030	2.24144091860887	3.26012311777558	2.65499952432481	1.22791853177626	0.219477552061244	0.353371668622246	10.2144618512272	1.97758254923188	0	1.2566011111941	0	0	Prtg	protogenin [Source:MGI Symbol;Acc:MGI:2444710]
ENSMUSG00000028392	717.994235980386	3.25928320058798	0.362914920307171	8.98084652410909	2.68691420355823e-19	2.91598184551952e-18	1364.65210332396	1172.70645169451	1363.42823012784	154.561936676874	177.364066027889	75.2526280312491	Bspry	B-box and SPRY domain containing [Source:MGI Symbol;Acc:MGI:2177191]
ENSMUSG00000028706	915.451759801022	3.25804188622637	0.113064900444025	28.8156790784008	1.36464569341658e-182	1.08795503134757e-180	1626.14232671537	1671.05725410094	1675.92512431727	163.777011492297	203.85642019408	151.952421986176	Nsun4	NOL1/NOP2/Sun domain family, member 4 [Source:MGI Symbol;Acc:MGI:1919431]
ENSMUSG00000024570	16.3865042470163	3.25734827189834	0.917672707616904	3.5495751860784	0.00038585326273401	0.00140112613974391	28.6004931834362	47.4619811815652	12.8423381173737	0	3.14316066378538	6.27105233593742	Rbfa	ribosome binding factor A [Source:MGI Symbol;Acc:MGI:1915981]
ENSMUSG00000022200	92.1364313526488	3.25186100044878	0.310326146151323	10.4788495612712	1.08050081366081e-25	1.4898213547117e-24	169.560066730372	166.116934135478	164.810005839629	19.2678837049762	22.451147598467	10.612550106971	Golph3	golgi phosphoprotein 3 [Source:MGI Symbol;Acc:MGI:1913879]
ENSMUSG00000121573	16.7803317818193	3.25050539506685	0.902220831456727	3.6027824693635	0.000314828985865386	0.00115856180413856	20.4289237024544	25.7085731400145	44.9481834108079	0	7.18436723150943	2.41194320612978		novel protein
ENSMUSG00000032280	476.525558348627	3.25030717355344	0.137049107236252	23.7163688191736	2.44427771658129e-124	1.27194485192977e-122	766.084638842042	913.64313774513	907.525226961074	90.4752800059751	90.2536133458372	91.1714531917056	Tle3	transducin-like enhancer of split 3 [Source:MGI Symbol;Acc:MGI:104634]
ENSMUSG00000094378	1.57660077480908	3.24681394106163	3.35682867051657	0.967226587874081	0.333430773509449	NA	0	0	8.56155874491579	0	0.898045903938679	0	Gm15097	predicted gene 15097 [Source:MGI Symbol;Acc:MGI:3710639]
ENSMUSG00000046204	16.1924418061865	3.24609868834038	0.867816551992885	3.74053557849977	0.000183628549564672	0.000699690033987691	24.5147084429453	35.5964858861739	27.8250659209763	2.9320692594529	6.28632132757075	0	Pnma2	paraneoplastic antigen MA2 [Source:MGI Symbol;Acc:MGI:2444129]
ENSMUSG00000037386	130.30840731756	3.24330119110572	0.258167186791819	12.5627940227782	3.38176161046776e-36	5.8415234929705e-35	241.061299688962	187.870342177029	278.250659209763	21.3622188902997	29.1864918780071	24.1194320612978	Rims2	regulating synaptic membrane exocytosis 2 [Source:MGI Symbol;Acc:MGI:2152972]
ENSMUSG00000074676	2.21415059059708	3.24269115200108	2.66670522247346	1.21599160067395	0.223988121646816	0.358617439356521	0	9.88791274615941	2.14038968622895	1.2566011111941	0	0	Foxs1	forkhead box S1 [Source:MGI Symbol;Acc:MGI:95546]
ENSMUSG00000034401	2537.84569919292	3.23982546395363	0.0726454228776868	44.5977920647324	0	0	4569.95023223906	4324.97303517013	4875.80770522954	524.421530405004	474.617260231592	457.304431882206	Spata6	spermatogenesis associated 6 [Source:MGI Symbol;Acc:MGI:1915196]
ENSMUSG00000033819	170.366590116975	3.23681426367107	0.29407449811643	11.0067832620751	3.54433345140007e-28	5.21667161361688e-27	306.433855536817	328.278703172492	288.952607640908	18.4301496308468	25.5943082622523	54.509916458533	Ppp1r16a	protein phosphatase 1, regulatory subunit 16A [Source:MGI Symbol;Acc:MGI:1920312]
ENSMUSG00000021486	8.26698448790687	3.23666561638572	1.36141317120954	2.37743080854001	0.0174337133869399	0.0444400683323164	14.3002465917181	19.7758254923188	10.7019484311447	0	0	4.82388641225955	Prelid1	PRELI domain containing 1 [Source:MGI Symbol;Acc:MGI:1913744]
ENSMUSG00000062028	3414.29900386895	3.23528712749312	0.058616285192085	55.1943391992706	0	0	5914.17341186056	6264.9815159666	6339.83425061014	631.651491893567	682.963909945365	652.189442937492	Irgc	immunity related GTPase cinema [Source:MGI Symbol;Acc:MGI:2685948]
ENSMUSG00000025056	31.346399051672	3.23518971172525	1.47219932569551	2.19752152800154	0.0279832206999748	0.0671582689748435	51.0723092561361	37.5740684354058	81.3348	0	3.14316066378538	14.9540478780046	Nr0b1	nuclear receptor subfamily 0, group B, member 1 [Source:MGI Symbol;Acc:MGI:1352460]
ENSMUSG00000021474	6.90608922720149	3.23454088278631	1.31611337176322	2.45764609051342	0.0139850916870296	0.036663698421498	8.17156948098178	7.91033019692753	21.4038968622895	1.2566011111941	2.69413771181604	0	Sfxn1	sideroflexin 1 [Source:MGI Symbol;Acc:MGI:2137677]
ENSMUSG00000024012	8.4128216107164	3.23395247519886	1.27041254626098	2.54559236266746	0.0109092499306879	0.0294440845025966	26.5576008131908	1.97758254923188	17.1231174898316	1.6754681482588	3.14316066378538	0	Mtch1	mitochondrial carrier 1 [Source:MGI Symbol;Acc:MGI:1929261]
ENSMUSG00000047945	27.4750957499134	3.23151280957721	0.578591474951808	5.58513726778704	2.33515697046364e-08	1.34206780229465e-07	40.8578474049089	63.2826415754202	44.9481834108079	8.37734074129399	4.49022951969339	2.89433184735573	Marcksl1	MARCKS-like 1 [Source:MGI Symbol;Acc:MGI:97143]
ENSMUSG00000027004	7.42437449430114	3.23030157278686	1.61415699969028	2.00123133834359	0.045367465222602	0.100469224532319	20.4289237024544	19.7758254923188	0	0	0	4.3414977710336	Frzb	frizzled-related protein [Source:MGI Symbol;Acc:MGI:892032]
ENSMUSG00000026500	4.43348297219054	3.22826909357794	1.8179141001646	1.77580948037403	0.0757643245931415	0.153216407311366	10.2144618512272	13.8430778446232	0	2.0943351853235	0.449022951969339	0	Cox20	cytochrome c oxidase assembly protein 20 [Source:MGI Symbol;Acc:MGI:1913609]
ENSMUSG00000004951	4.91922880323545	3.22401961657116	1.69361527932178	1.90363163106455	0.0569581762777423	0.121595983044191	8.17156948098178	9.88791274615941	8.56155874491579	0	0	2.89433184735573	Hspb1	heat shock protein 1 [Source:MGI Symbol;Acc:MGI:96240]
ENSMUSG00000029503	43.8158009166468	3.22394786960291	0.596153498578243	5.40791570844028	6.37624186746328e-08	3.54181867376689e-07	118.487757474236	90.9687972646666	27.8250659209763	2.0943351853235	8.08241313544811	15.4364365192306	P2rx2	purinergic receptor P2X, ligand-gated ion channel, 2 [Source:MGI Symbol;Acc:MGI:2665170]
ENSMUSG00000029050	8.2019862772512	3.22276760287893	1.45027998981891	2.22216925387032	0.0262718694618862	0.0635563587818475	22.4718160726999	19.7758254923188	2.14038968622895	0	0	4.82388641225955	Ski	ski sarcoma viral oncogene homolog (avian) [Source:MGI Symbol;Acc:MGI:98310]
ENSMUSG00000049892	7.18214162604012	3.2214851692395	1.31071356163418	2.45781020623834	0.0139787027580465	0.0366576324870261	20.4289237024544	9.88791274615941	8.56155874491579	0.837734074129399	0	3.37672048858169	Rasd1	RAS, dexamethasone-induced 1 [Source:MGI Symbol;Acc:MGI:1270848]
ENSMUSG00000028551	26.051098051214	3.22092239273294	0.64974267665123	4.95722769717629	7.15061574611e-07	3.64177756078502e-06	46.9865245156452	53.3947288292608	40.6674	0.837734074129399	7.18436723150943	7.23582961838933	Cdkn2c	cyclin dependent kinase inhibitor 2C [Source:MGI Symbol;Acc:MGI:105388]
ENSMUSG00000031241	4.09286836229364	3.22020057255513	2.03693556951328	1.58090448257261	0.113899879247248	0.211903185968291	12.2573542214727	9.88791274615941	0	0	0	2.41194320612978	Tbx22	T-box 22 [Source:MGI Symbol;Acc:MGI:2389465]
ENSMUSG00000043421	13.8898570675278	3.2191090803452	2.04584010072455	1.57349006855674	0.115605386162012	0.214498610726083	24.5147084429453	33.618903336942	17.1231174898316	0	8.08241313544811	0	Hilpda	hypoxia inducible lipid droplet associated [Source:MGI Symbol;Acc:MGI:1916823]
ENSMUSG00000059895	57.2056144730777	3.21489660931458	0.450574793889259	7.13510088206294	9.67161992291253e-13	7.57945412610354e-12	128.702219325463	112.722205306217	68.4924699593263	9.63394185248809	18.8589639827123	4.82388641225955	Ptp4a3	protein tyrosine phosphatase 4a3 [Source:MGI Symbol;Acc:MGI:1277098]
ENSMUSG00000032294	417.201508286306	3.20823849898974	0.175067932447945	18.3256776619767	5.16342781464612e-75	1.62576080331022e-73	706.840760104924	719.840047920405	832.61158794306	85.4488755611987	100.581141241132	57.8866369471147	Pkm	pyruvate kinase, muscle [Source:MGI Symbol;Acc:MGI:97591]
ENSMUSG00000040824	26.2962317911022	3.20741942834355	2.29884671378918	1.39522979462026	0.162946555021348	0.281389378617122	30.6433855536817	73.1705543215797	38.527014352121	0	0	15.4364365192306	Snrpd2	small nuclear ribonucleoprotein D2 [Source:MGI Symbol;Acc:MGI:98345]
ENSMUSG00000102312	8.42709355595433	3.20689630986939	3.05233949405642	1.05063552600028	0.293426018085209	0.435898158973452	0	17.7982429430869	27.8250659209763	0	4.93925247166273	0	Pcdha3	protocadherin alpha 3 [Source:MGI Symbol;Acc:MGI:2447313]
ENSMUSG00000023495	50.7999883418681	3.20572947908792	0.430466560078061	7.44710455210875	9.54110071212406e-14	7.89505452805635e-13	73.544125328836	128.542865700072	72.7732493317842	9.21507481542339	6.73534427954009	13.9892705955527	Pcbp4	poly(rC) binding protein 4 [Source:MGI Symbol;Acc:MGI:1890471]
ENSMUSG00000031214	102.466549054273	3.20364881595329	0.27010924633332	11.8605670092461	1.8968620423885e-32	3.05982791455068e-31	192.031882803072	172.049681783174	190.494682074376	20.1056177791056	18.4099410307429	21.707488855168	Ophn1	oligophrenin 1 [Source:MGI Symbol;Acc:MGI:2151070]
ENSMUSG00000060407	101.281056930101	3.20328483073365	0.383261630633582	8.3579585711155	6.38128463549966e-17	6.1954751765581e-16	185.903205692335	179.960011980101	181.93312332946	8.37734074129399	14.3687344630189	37.1439253743986	Cyp2a12	cytochrome P450, family 2, subfamily a, polypeptide 12 [Source:MGI Symbol;Acc:MGI:105055]
ENSMUSG00000063765	7.21570794851893	3.20165974076683	1.42317476162467	2.24966028565028	0.0244705183837595	0.0597917165302195	12.2573542214727	11.8654952953913	14.9827278036026	4.18867037064699	0	0	Chadl	chondroadherin-like [Source:MGI Symbol;Acc:MGI:3036284]
ENSMUSG00000074918	9.71382576765456	3.20012288334182	1.37747687607717	2.32317720821221	0.0201696346389171	0.0504829434502337	28.6004931834362	21.7534080415507	2.14038968622895	0	0	5.78866369471147	Inafm2	InaF motif containing 2 [Source:MGI Symbol;Acc:MGI:1915354]
ENSMUSG00000045004	3992.07744183674	3.19967194283288	0.0601264632109978	53.2157019049082	0	0	7135.82304926734	6913.62859211466	7553.43520270195	840.666143388852	766.033156059693	742.878507487971	Spata21	spermatogenesis associated 21 [Source:MGI Symbol;Acc:MGI:3607787]
ENSMUSG00000023019	9.45148624849076	3.19845405086126	1.19644352881518	2.67330130827709	0.00751087549990402	0.0210626287694039	24.5147084429453	13.8430778446232	12.8423381173737	5.02640444477639	0	0.482388641225955	Gpd1	glycerol-3-phosphate dehydrogenase 1 (soluble) [Source:MGI Symbol;Acc:MGI:95679]
ENSMUSG00000025733	7.6064498684009	3.19500022376643	1.3974752052491	2.28626612605761	0.0222386943099902	0.0550194233406303	14.3002465917181	11.8654952953913	14.9827278036026	0	4.49022951969339	0	Rhot2	ras homolog family member T2 [Source:MGI Symbol;Acc:MGI:2384892]
ENSMUSG00000025702	15.4439930424359	3.19424114545516	0.833711938915049	3.83134869054651	0.000127442740020341	0.000495697898486329	28.6004931834362	33.618903336942	21.4038968622895	5.86413851890579	2.69413771181604	0.482388641225955	Marchf8	membrane associated ring-CH-type finger 8 [Source:MGI Symbol;Acc:MGI:1919029]
ENSMUSG00000092519	1153.65937404293	3.1931290936979	0.10090173892396	31.6459272927324	8.62760097598525e-220	8.65334462405876e-218	2098.05046424207	2147.65464846582	1994.84318756538	257.60322779479	223.613430080731	200.191286108772	Actl9	actin-like 9 [Source:MGI Symbol;Acc:MGI:1916731]
ENSMUSG00000030695	838.984584860358	3.19303441824091	0.105608472549834	30.2346425542154	8.30558201661408e-201	7.026974390519e-199	1607.75629538316	1427.81460054542	1502.55355973272	174.248687418915	165.240446324717	156.29391975721	Aldoa	aldolase A, fructose-bisphosphate [Source:MGI Symbol;Acc:MGI:87994]
ENSMUSG00000057672	16.3704687555333	3.19010463640837	0.912183436634164	3.49721833163233	0.000470136890230004	0.00168310089343424	51.0723092561361	13.8430778446232	23.5442865485184	0	4.93925247166273	4.82388641225955	Pkn1	protein kinase N1 [Source:MGI Symbol;Acc:MGI:108022]
ENSMUSG00000020357	44.1261062283712	3.18973633051716	0.526403110214135	6.05949370097682	1.36550674888053e-09	8.70020872737047e-09	112.359080363499	79.1033019692753	47.0885730970368	3.76980333358229	16.1648262708962	6.27105233593742	Flt4	FMS-like tyrosine kinase 4 [Source:MGI Symbol;Acc:MGI:95561]
ENSMUSG00000021959	79.7406063170268	3.18815268602694	0.388157601676137	8.21355210424812	2.14739482597248e-16	2.02480283931916e-15	140.959573546936	138.430778446232	151.967667722255	18.4301496308468	23.3491935024056	5.30627505348551	Lats2	large tumor suppressor 2 [Source:MGI Symbol;Acc:MGI:1354386]
ENSMUSG00000030225	7.61323654657328	3.18639793234278	1.16591287754958	2.73296400931748	0.00627671906073383	0.017966295732646	24.5147084429453	5.93274764769565	10.7019484311447	0.837734074129399	2.2451147598467	1.44716592367787	Dera	deoxyribose-phosphate aldolase [Source:MGI Symbol;Acc:MGI:1913762]
ENSMUSG00000042770	1.51160256415341	3.18595487502941	3.41179435298406	0.933806245456406	0.35040384731067	NA	8.17156948098178	0	0	0	0.898045903938679	0	Hebp1	heme binding protein 1 [Source:MGI Symbol;Acc:MGI:1333880]
ENSMUSG00000020160	3.77900641038352	3.18591110416918	2.35739549532774	1.35145380165675	0.176550109263807	0.29923054087135	20.4289237024544	0	0	0	2.2451147598467	0	Meis1	Meis homeobox 1 [Source:MGI Symbol;Acc:MGI:104717]
ENSMUSG00000051413	52.8741428181751	3.18574118635096	0.414529761410836	7.68519291717056	1.52766615499019e-14	1.32033245098075e-13	85.8014795503087	65.2602241246521	134.844550232424	9.63394185248809	13.0216656071108	8.6829955420672	Plagl2	pleiomorphic adenoma gene-like 2 [Source:MGI Symbol;Acc:MGI:1933165]
ENSMUSG00000028541	39.3866313193308	3.18490178509781	0.496546168103957	6.4141100861965	1.41647827674502e-10	9.63716648133361e-10	77.6299100693269	73.1705543215797	62.0713009006395	4.18867037064699	13.4706885590802	5.78866369471147	B4galt2	UDP-Gal:betaGlcNAc beta 1,4- galactosyltransferase, polypeptide 2 [Source:MGI Symbol;Acc:MGI:1858493]
ENSMUSG00000020277	13.6905097809149	3.18340239778868	0.989919820874502	3.21581842353297	0.00130073103210454	0.00429901457514859	34.7291702941726	15.8206603938551	23.5442865485184	6.70187259303519	1.34706885590802	0	Pfkl	phosphofructokinase, liver, B-type [Source:MGI Symbol;Acc:MGI:97547]
ENSMUSG00000098022	1.51213752654541	3.18306578180215	3.14816952516415	1.01108461801662	0.311975931792494	NA	8.17156948098178	0	0	0.418867037064699	0	0.482388641225955	Zfp82	zinc finger protein 82 [Source:MGI Symbol;Acc:MGI:1890753]
ENSMUSG00000043091	33.1655365980237	3.18245563079454	0.558588037373611	5.69732149252233	1.21704300155967e-08	7.15667319640546e-08	75.5870176990814	65.2602241246521	38.527014352121	10.4716759266175	6.73534427954009	2.41194320612978	Tuba1c	tubulin, alpha 1C [Source:MGI Symbol;Acc:MGI:1095409]
ENSMUSG00000031971	462.498399276061	3.17992531980584	0.175907986345703	18.0772083511688	4.81868257305639e-73	1.47248047078875e-71	858.014795503087	816.741592832768	824.050029198145	90.8941470430398	64.2102821316155	121.079548947715	Ccsap	centriole, cilia and spindle associated protein [Source:MGI Symbol;Acc:MGI:1920670]
ENSMUSG00000043060	1340.64353478995	3.17813469314353	0.120355576787785	26.4062104803612	1.16267531878818e-153	7.61062786303611e-152	2202.23797512459	2367.16631143056	2673.34671809996	237.497610015685	231.24682026421	332.365773804683	Fscb	fibrous sheath CABYR binding protein [Source:MGI Symbol;Acc:MGI:3646964]
ENSMUSG00000073676	4.64883204789309	3.1756105337096	1.6445919836377	1.93094127011699	0.0534903157113762	0.115516418909947	2.04289237024544	5.93274764769565	17.1231174898316	0	1.34706885590802	1.44716592367787	Hspe1	heat shock protein 1 (chaperonin 10) [Source:MGI Symbol;Acc:MGI:104680]
ENSMUSG00000040699	491.653801602697	3.17329400539561	0.14287744772746	22.2099012536163	2.75542492875103e-109	1.21522056166229e-107	915.215781869959	880.024234408188	860.436653864037	92.1507481542339	117.194990463998	84.9004008557682	Limd2	LIM domain containing 2 [Source:MGI Symbol;Acc:MGI:1915053]
ENSMUSG00000040151	10.1351462033383	3.17196465041142	1.16731026126536	2.71732782248742	0.00658113870438831	0.0187470504045986	24.5147084429453	23.7309905907826	6.42116905868684	0.837734074129399	0	5.30627505348551	Hs2st1	heparan sulfate 2-O-sulfotransferase 1 [Source:MGI Symbol;Acc:MGI:1346049]
ENSMUSG00000020029	875.30200983417	3.17135306925384	0.102643963897669	30.8966348222435	1.32548617074256e-209	1.21213761070038e-207	1540.34084716506	1586.02120448397	1601.01148529925	174.248687418915	188.589639827123	161.600194810695	Nudt4	nudix hydrolase 4 [Source:MGI Symbol;Acc:MGI:1918457]
ENSMUSG00000048230	23.9533811916162	3.16901878673925	0.760322750522449	4.16799	3.072953460079e-05	0.000130884665010282	65.3725558478542	27.6861556892464	36.3866246658921	7.53960666716459	6.73534427954009	0	Fbxo43	F-box protein 43 [Source:MGI Symbol;Acc:MGI:1926053]
ENSMUSG00000064036	9.52526587277512	3.1685164681399	1.2970253766888	2.4429101581874	0.0145693636960044	0.0380191305680249	24.5147084429453	11.8654952953913	14.9827278036026	0	0	5.78866369471147	Mro	maestro [Source:MGI Symbol;Acc:MGI:2152817]
ENSMUSG00000037979	803.572836991726	3.16800263329187	0.124012748323816	25.5457819950875	6.11640445863979e-144	3.72890795353446e-142	1493.35432264942	1427.81460054542	1416.93797228356	129.429914452992	184.099410307429	169.800801711536	Ccdc92	coiled-coil domain containing 92 [Source:MGI Symbol;Acc:MGI:106485]
ENSMUSG00000029769	5537.08886809114	3.16647197281313	0.0575401938573081	55.0306100925825	0	0	9997.9152599812	10245.8551875704	9648.87670552009	1154.39755415031	1000.87215993966	1174.6163413852	Ccdc136	coiled-coil domain containing 136 [Source:MGI Symbol;Acc:MGI:1918128]
ENSMUSG00000022209	1.58772267122795	3.16130899757826	3.34664118099603	0.944621435823423	0.344852179355885	NA	0	0	8.56155874491579	0	0	0.964777282451911	Dhrs2	dehydrogenase/reductase member 2 [Source:MGI Symbol;Acc:MGI:1918662]
ENSMUSG00000042340	1.58772267122795	3.16130899757826	3.34664118099603	0.944621435823423	0.344852179355885	NA	0	0	8.56155874491579	0	0	0.964777282451911	Ctf1	cardiotrophin 1 [Source:MGI Symbol;Acc:MGI:105115]
ENSMUSG00000033502	419.895365091191	3.16095756211972	0.166898109241496	18.9394450092057	5.39629181464138e-80	1.7896981679652e-78	847.800333651859	793.010602241985	624.993788378853	72.0451303751283	101.92821009704	79.5941258022826	Cdc14a	CDC14 cell division cycle 14A [Source:MGI Symbol;Acc:MGI:2442676]
ENSMUSG00000029201	2.38158400684192	3.16056323897118	2.83162165504159	1.11616720875966	0.26435056786694	0.404892612384375	0	0	12.8423381173737	0	0	1.44716592367787	Ugdh	UDP-glucose dehydrogenase [Source:MGI Symbol;Acc:MGI:1306785]
ENSMUSG00000022292	3.1754453424559	3.15996760910643	2.52644301531131	1.25075752350467	0.211022956382852	0.343385124759064	0	0	17.1231174898316	0	0	1.92955456490382	Rrm2b	ribonucleotide reductase M2 B (TP53 inducible) [Source:MGI Symbol;Acc:MGI:2155865]
ENSMUSG00000020723	3.51089173557225	3.15748000281935	2.17468347607016	1.45192624010055	0.146522115503994	0.258518307635576	6.12867711073633	0	12.8423381173737	2.0943351853235	0	0	Cacng4	calcium channel, voltage-dependent, gamma subunit 4 [Source:MGI Symbol;Acc:MGI:1859167]
ENSMUSG00000022155	1530.43522041094	3.15565748281524	0.0907550261857931	34.7711594105543	6.63846803657442e-265	7.93871413181501e-263	2755.8618074611	2802.23447226158	2696.89100464847	269.331504832602	313.867043426568	344.425489835332	Mroh2b	maestro heat-like repeat family member 2B [Source:MGI Symbol;Acc:MGI:1921905]
ENSMUSG00000094445	1196.82718447736	3.15088230674187	0.0946166032749338	33.3015791909813	3.66304008102167e-243	3.96149821631882e-241	2267.61053097244	2112.05816257965	2074.03760595585	217.810859273644	259.086243286309	250.359704796271	Ccdc179	coiled-coil domain containing 179 [Source:MGI Symbol;Acc:MGI:1922779]
ENSMUSG00000007338	7.88843966502901	3.15040719761757	1.21013886385231	2.60334354322666	0.00923193938882687	0.0252401912901384	12.2573542214727	21.7534080415507	8.56155874491579	2.5132022223882	2.2451147598467	0	Mrpl49	mitochondrial ribosomal protein L49 [Source:MGI Symbol;Acc:MGI:108180]
ENSMUSG00000029128	229.708188782473	3.14586747095159	0.202385497861162	15.5439372099165	1.748999911898e-54	4.32451528912036e-53	347.291702941726	484.507724561811	406.674	47.7508422253757	53.4337312843514	38.5910912980764	Rab28	RAB28, member RAS oncogene family [Source:MGI Symbol;Acc:MGI:1917285]
ENSMUSG00000031849	508.945633170943	3.14582120594852	0.13662157883936	23.0258004092265	2.57134633502174e-117	1.24921228002599e-115	900.915535278241	937.374128335912	905.384837274845	94.6639503766221	120.787174079752	94.5481736802873	Comp	cartilage oligomeric matrix protein [Source:MGI Symbol;Acc:MGI:88469]
ENSMUSG00000070424	103.74856621673	3.14542845206964	0.393518297829237	7.99309325492804	1.3159451135847e-15	1.19375706620371e-14	143.002465917181	191.825507275493	224.740917054039	38.954634447017	8.53143608741745	15.4364365192306	Art5	ADP-ribosyltransferase 5 [Source:MGI Symbol;Acc:MGI:107948]
ENSMUSG00000064225	212.574085120151	3.14495176626614	0.220987306898973	14.2313683550336	5.85252824799081e-46	1.21313156367103e-44	388.149550346634	383.651014550985	374.568195090066	56.1281829666697	44.0042492929953	28.9433184735573	Paqr9	progestin and adipoQ receptor family member IX [Source:MGI Symbol;Acc:MGI:1922802]
ENSMUSG00000058935	431.117	3.14391224283959	0.172962877658436	18.176803516464	7.87948179361289e-74	2.43773918077521e-72	790.599347284987	828.607088128159	704.188206769324	64.086656670899	110.459646184457	88.7595099855758	Tex48	testis expressed 48 [Source:MGI Symbol;Acc:MGI:1922774]
ENSMUSG00000031812	1.4680626834777	3.14343013331788	3.45050444319372	0.911005965959107	0.362292230238347	NA	0	7.91033019692753	0	0	0.898045903938679	0	Map1lc3b	microtubule-associated protein 1 light chain 3 beta [Source:MGI Symbol;Acc:MGI:1914693]
ENSMUSG00000054764	1.4680626834777	3.14343013331788	3.45050444319372	0.911005965959107	0.362292230238347	NA	0	7.91033019692753	0	0	0.898045903938679	0	Mtnr1a	melatonin receptor 1A [Source:MGI Symbol;Acc:MGI:102967]
ENSMUSG00000099398	1434.74634021541	3.14101054617267	0.0845820687387808	37.135655263685	7.47197541126003e-302	9.99236109568182e-300	2668.01743554055	2596.56588714146	2467.86930822198	314.569144835589	279.741299076898	281.714966475958	Ms4a14	membrane-spanning 4-domains, subfamily A, member 14 [Source:MGI Symbol;Acc:MGI:2686122]
ENSMUSG00000022053	0.788300387404539	3.14014811344269	4.03316858167454	0.778580922134162	0.436226620848263	NA	0	0	4.28077937245789	0	0.449022951969339	0	Ebf2	early B cell factor 2 [Source:MGI Symbol;Acc:MGI:894332]
ENSMUSG00000031616	0.788300387404539	3.14014811344269	4.03316858167454	0.778580922134162	0.436226620848263	NA	0	0	4.28077937245789	0	0.449022951969339	0	Ednra	endothelin receptor type A [Source:MGI Symbol;Acc:MGI:105923]
ENSMUSG00000035585	0.788300387404539	3.14014811344269	4.03316858167454	0.778580922134162	0.436226620848263	NA	0	0	4.28077937245789	0	0.449022951969339	0	Tsen34	tRNA splicing endonuclease subunit 34 [Source:MGI Symbol;Acc:MGI:1913328]
ENSMUSG00000075602	7.04725470454227	3.13997180001711	1.66341356298959	1.88766754695312	0.0590705957511599	0.124921101744121	12.2573542214727	0	25.6846762347474	0	0	4.3414977710336	Ly6a	lymphocyte antigen 6 family member A [Source:MGI Symbol;Acc:MGI:107527]
ENSMUSG00000015363	50.1145152430976	3.13534080407017	0.461984275744942	6.78668294286528	1.14740983213568e-11	8.41907733467344e-11	71.5012329585905	108.767040207754	89.8963668216158	16.3358144455233	10.3275278952948	3.85910912980764	Trabd	TraB domain containing [Source:MGI Symbol;Acc:MGI:1915226]
ENSMUSG00000028969	21.8649197986971	3.13445275293819	0.811866741785019	3.86079708850568	0.000113017731629645	0.000444107907828717	46.9865245156452	23.7309905907826	47.0885730970368	1.6754681482588	11.2255737992335	0.482388641225955	Cdk5	cyclin dependent kinase 5 [Source:MGI Symbol;Acc:MGI:101765]
ENSMUSG00000026246	2.33283534885017	3.13291547482267	2.57866285555993	1.21493799318034	0.224389741738387	0.359121762707544	6.12867711073633	0	6.42116905868684	0	0	1.44716592367787	Alppl2	alkaline phosphatase, placental-like 2 [Source:MGI Symbol;Acc:MGI:108009]
ENSMUSG00000059498	8.73436908684858	3.1326667572537	1.24984496776196	2.50644426953465	0.0121952280919919	0.0324988326076931	8.17156948098178	21.7534080415507	17.1231174898316	0.418867037064699	4.93925247166273	0	Fcgr3	Fc receptor, IgG, low affinity III [Source:MGI Symbol;Acc:MGI:95500]
ENSMUSG00000018570	793.581314905128	3.13164578938952	0.11529916225844	27.1610454755084	1.87510244573059e-162	1.28843365290339e-160	1325.83714828929	1556.35746624549	1391.25329604882	145.765728898515	178.262111931828	164.012138016825	2810408A11Rik	RIKEN cDNA 2810408A11 gene [Source:MGI Symbol;Acc:MGI:1917669]
ENSMUSG00000053192	236.978516624161	3.12989373219061	0.223557283611851	14.0004104613512	1.54973088806487e-44	3.12889659981538e-43	555.666724706761	322.345955524797	398.112481638584	54.0338477813462	38.1669509173938	53.5451391760811	Mllt11	myeloid/lymphoid or mixed-lineage leukemia; translocated to, 11 [Source:MGI Symbol;Acc:MGI:1929671]
ENSMUSG00000078554	508.309555112972	3.12920341649701	0.138967644242317	22.5174963104407	2.79732551463839e-112	1.28853101576139e-110	882.529503946032	822.674340480463	1031.66782876235	97.5960196360749	100.581141241132	114.808496611777	Fam229a	family with sequence similarity 229, member A [Source:MGI Symbol;Acc:MGI:1915483]
ENSMUSG00000031323	52.8524230146465	3.12472913654393	0.487420571510552	6.41074529714691	1.44809952552101e-10	9.84691842477029e-10	132.788004065954	57.3498939277246	94.1771461940737	6.70187259303519	5.83729837560141	20.2603229314901	Dmrtc1a	DMRT-like family C1a [Source:MGI Symbol;Acc:MGI:1918137]
ENSMUSG00000055891	2106.08363542391	3.12367147434624	0.0741498057099371	42.1264957397943	0	0	3644.51998851787	3808.82398982061	3882.66689081931	414.678366694052	471.923122519776	413.88945417187	Ubl4b	ubiquitin-like 4B [Source:MGI Symbol;Acc:MGI:1914841]
ENSMUSG00000045973	2.31658579618626	3.12269935112032	2.59351522023309	1.20404126675596	0.228573628956635	0.364270915342603	8.17156948098178	0	4.28077937245789	0	0	1.44716592367787	Slc25a51	solute carrier family 25, member 51 [Source:MGI Symbol;Acc:MGI:2684984]
ENSMUSG00000036427	1335.90875203167	3.12219582649813	0.113972311862984	27.3943361809803	3.20354236168365e-165	2.26377592910566e-163	2288.0394546749	2509.55225497526	2392.95566920396	338.025698911212	231.695843216179	255.18359120853	Gpi1	glucose-6-phosphate isomerase 1 [Source:MGI Symbol;Acc:MGI:95797]
ENSMUSG00000033389	69.2308970094165	3.11936092287395	0.463838902463504	6.72509551550474	1.75477294856598e-11	1.26736998613909e-10	234.932622578226	69.2153892231159	68.4924699593263	20.5244848161703	12.5726426551415	9.64777282451911	Arhgap44	Rho GTPase activating protein 44 [Source:MGI Symbol;Acc:MGI:2144423]
ENSMUSG00000079019	19.8383226330585	3.11897557760335	0.704592012219923	4.42664055724468	9.57120238368758e-06	4.36033128373342e-05	38.8149550346634	31.6413207877101	36.3866246658921	6.28300555597049	4.93925247166273	0.964777282451911	Insl3	insulin-like 3 [Source:MGI Symbol;Acc:MGI:108427]
ENSMUSG00000018196	115.061391198134	3.11343417075749	0.305380875003815	10.1952493610433	2.08209522649428e-24	2.76952067720956e-23	216.546591246017	160.184186487782	241.864034543871	14.2414792601998	24.2472394063443	33.2848162445909	Glrx2	glutaredoxin 2 [Source:MGI Symbol;Acc:MGI:1916617]
ENSMUSG00000038366	19.9429964754947	3.11273560666003	0.811146908300643	3.83744988091149	0.000124318596625352	0.000484990710862456	34.7291702941726	29.6637382384782	42.8077937245789	0	7.63339018347877	4.82388641225955	Lasp1	LIM and SH3 protein 1 [Source:MGI Symbol;Acc:MGI:109656]
ENSMUSG00000021791	176.71	3.11193989378711	0.250413266457377	12.4272165680839	1.85998526773118e-35	3.17755999653472e-34	294.176501315344	350.032111214043	306.075725130739	43.5621718547287	21.5531016945283	44.8621436340139	Dydc2	DPY30 domain containing 2 [Source:MGI Symbol;Acc:MGI:1918450]
ENSMUSG00000041828	4.41637987163597	3.11168033680604	2.02748285631475	1.5347505046045	0.124845124865929	0.227635070804509	0	23.7309905907826	0	0.837734074129399	0	1.92955456490382	Abca8a	ATP-binding cassette, sub-family A member 8a [Source:MGI Symbol;Acc:MGI:2386846]
ENSMUSG00000062729	0.767024848923182	3.11107427930824	4.03570036174975	0.770888321837496	0.44077312973462	NA	2.04289237024544	0	2.14038968622895	0.418867037064699	0	0	Ppox	protoporphyrinogen oxidase [Source:MGI Symbol;Acc:MGI:104968]
ENSMUSG00000093661	15.0932324112486	3.11091298964535	0.979200613996204	3.17699248262258	0.00148810893186621	0.00487042389095264	16.3431389619636	43.5068160831014	21.4038968622895	7.95847370422929	1.34706885590802	0	Eif4e3	eukaryotic translation initiation factor 4E member 3 [Source:MGI Symbol;Acc:MGI:1914142]
ENSMUSG00000054263	11.9977175064162	3.10961199053909	1.07044013462953	2.90498449183736	0.00367271297193219	0.0111490190949282	30.6433855536817	3.95516509846377	29.9654556072053	2.9320692594529	4.49022951969339	0	Lifr	LIF receptor alpha [Source:MGI Symbol;Acc:MGI:96788]
ENSMUSG00000031530	44.4923107957872	3.10817305760256	0.523105755391681	5.94176803746936	2.81964225195119e-09	1.74815008412348e-08	69.4583405883451	41.5292335338695	128.423381173737	15.9169474084586	5.83729837560141	5.78866369471147	Dusp4	dual specificity phosphatase 4 [Source:MGI Symbol;Acc:MGI:2442191]
ENSMUSG00000005225	26.4428265665502	3.10658191206527	0.753213492462862	4.12443741801193	3.71642021304272e-05	0.000156788053560421	59.2438787371179	33.618903336942	49.2289627832658	0	10.7765508472641	5.78866369471147	Plekha8	pleckstrin homology domain containing, family A (phosphoinositide binding specific) member 8 [Source:MGI Symbol;Acc:MGI:2681164]
ENSMUSG00000026525	12.8629502202641	3.10372743160957	1.00422311758173	3.09067514705662	0.00199701986936409	0.00639962280733863	38.8149550346634	21.7534080415507	8.56155874491579	4.18867037064699	0	3.85910912980764	Opn3	opsin 3 [Source:MGI Symbol;Acc:MGI:1338022]
ENSMUSG00000032802	21.4654875093385	3.10210330708454	0.674100873783609	4.60183843060903	4.18778013860216e-06	1.97735085739541e-05	30.6433855536817	63.2826415754202	21.4038968622895	3.35093629651759	6.73534427954009	3.37672048858169	Srxn1	sulfiredoxin 1 homolog (S. cerevisiae) [Source:MGI Symbol;Acc:MGI:104971]
ENSMUSG00000075225	1.52272446057228	3.09993810949129	3.40109882053315	0.911451937466888	0.362057298590688	NA	8.17156948098178	0	0	0	0	0.964777282451911	Ccdc162	coiled-coil domain containing 162 [Source:MGI Symbol;Acc:MGI:1923223]
ENSMUSG00000038274	7.15206513286696	3.09884146131365	1.47997	2.09385280006844	0.0362730949864629	0.0835113814044131	16.3431389619636	17.7982429430869	4.28077937245789	0	4.49022951969339	0	Fau	FAU ubiquitin like and ribosomal protein S30 fusion [Source:MGI Symbol;Acc:MGI:102547]
ENSMUSG00000074771	1400.14198923461	3.09865174938979	0.0950849942883926	32.5882309041486	6.02096747402131e-233	6.29266995583218e-231	2672.10322028104	2592.61	2258.11111897154	291.112590759966	320.153364754139	266.760918597953	Ankef1	ankyrin repeat and EF-hand domain containing 1 [Source:MGI Symbol;Acc:MGI:2441685]
ENSMUSG00000041220	3.03977272829168	3.09852647629663	2.30861540077648	1.34215793382235	0.179544792727159	0.303355330409955	0	9.88791274615941	6.42116905868684	0	0	1.92955456490382	Elovl6	ELOVL fatty acid elongase 6 [Source:MGI Symbol;Acc:MGI:2156528]
ENSMUSG00000007207	4.56817338171684	3.09643321393791	2.20078279458917	1.40696902100052	0.159436575095826	0.276402660226762	24.5147084429453	0	0	0	0	2.89433184735573	Stx1a	syntaxin 1A (brain) [Source:MGI Symbol;Acc:MGI:109355]
ENSMUSG00000019189	7.46960179684147	3.09569734827243	1.51836005532847	2.03884272205958	0.0414657269610519	0.0933410400388421	10.2144618512272	0	29.9654556072053	4.18867037064699	0.449022951969339	0	Rnf145	ring finger protein 145 [Source:MGI Symbol;Acc:MGI:1921565]
ENSMUSG00000064210	22.2674020434318	3.09479733491679	0.636639365146822	4.86114667792034	1.16707735435871e-06	5.82227880311244e-06	20.4289237024544	43.5068160831014	55.6501318419526	4.18867037064699	4.04120656772405	5.78866369471147	Ano6	anoctamin 6 [Source:MGI Symbol;Acc:MGI:2145890]
ENSMUSG00000064341	322.91973933169	3.09033848428431	0.475743693889464	6.49580545990868	8.25903263889638e-11	5.70970477653998e-10	551.58093996627	640.73674595113	541.518590615924	69.9507951898048	30.9825836858844	102.748780581129	mt-Nd1	mitochondrially encoded NADH dehydrogenase 1 [Source:MGI Symbol;Acc:MGI:101787]
ENSMUSG00000029423	449.748160864775	3.0895917611126	0.141202567641414	21.8805635954063	3.97895891403463e-106	1.67183486533273e-104	774.256208323023	824.651923029695	815.488470453229	87.9620777835869	87.1104526820518	109.019832917066	Piwil1	piwi-like RNA-mediated gene silencing 1 [Source:MGI Symbol;Acc:MGI:1928897]
ENSMUSG00000068617	82.4723049776784	3.08873657130443	0.311817090158672	9.90560385812301	3.93585141782818e-23	4.94446303874031e-22	126.659326955218	164.139351586246	151.967667722255	19.2678837049762	13.0216656071108	19.7779342902642	Clxn	calaxin [Source:MGI Symbol;Acc:MGI:1914043]
ENSMUSG00000039697	47.8264393917817	3.08796439656341	0.423447795156734	7.29243234203271	3.04408449781121e-13	2.45839473371935e-12	114.401972733745	65.2602241246521	77.0540287042421	7.53960666716459	12.5726426551415	10.1301614657451	Ncoa7	nuclear receptor coactivator 7 [Source:MGI Symbol;Acc:MGI:2444847]
ENSMUSG00000064363	133.881393247602	3.08620845963611	0.34512639525357	8.94225565497132	3.81306224391026e-19	4.09879473876507e-18	179.774528581599	369.807936706362	169.090785212087	39.3735014840817	14.3687344630189	30.8728730384612	mt-Nd4	mitochondrially encoded NADH dehydrogenase 4 [Source:MGI Symbol;Acc:MGI:102498]
ENSMUSG00000035342	85.433041998502	3.08500994550512	0.310748959221806	9.92765978438277	3.15574842006583e-23	3.97247399801202e-22	130.745111695708	150.296273741623	177.652343957003	22.6188200014938	13.9197115110495	17.3659910841344	Lzts2	leucine zipper, putative tumor suppressor 2 [Source:MGI Symbol;Acc:MGI:2385095]
ENSMUSG00000049971	64.3431406545281	3.08307405602379	0.357640241447332	8.62060165138832	6.66032284504459e-18	6.75647921890861e-17	93.9730490312904	120.632535503145	130.563770859966	10.0528088895528	13.4706885590802	17.3659910841344	Glt1d1	glycosyltransferase 1 domain containing 1 [Source:MGI Symbol;Acc:MGI:2442755]
ENSMUSG00000048764	0.761362230286141	3.08155866712286	4.03832165247063	0.763079054200048	0.445416250873377	NA	4.08578474049089	0	0	0	0	0.482388641225955	Tmprss11f	transmembrane protease, serine 11f [Source:MGI Symbol;Acc:MGI:2442348]
ENSMUSG00000025527	113.127503627856	3.08028265025608	0.35813904898135	8.60080088730142	7.91617203338892e-18	8.01085692264101e-17	183.86031332209	191.825507275493	231.162086112726	9.21507481542339	39.0649968213325	23.6370434200718	Satl1	spermidine/spermine N1-acetyl transferase-like 1 [Source:MGI Symbol;Acc:MGI:1921059]
ENSMUSG00000039844	222.241766593815	3.07895747558286	0.242726196002598	12.6848998018735	7.17054915923569e-37	1.25605802666781e-35	471.908137526698	395.516509846376	325.339	63.2489225967696	48.4944788126887	28.9433184735573	Rapgef1	Rap guanine nucleotide exchange factor (GEF) 1 [Source:MGI Symbol;Acc:MGI:104580]
ENSMUSG00000068758	34.599783216998	3.07833410331279	0.617767008294057	4.9830017821986	6.2605373770693e-07	3.21479369771308e-06	61.2867711073633	21.7534080415507	102.738704938989	13.4037451860704	3.59218361575472	4.82388641225955	Il3ra	interleukin 3 receptor, alpha chain [Source:MGI Symbol;Acc:MGI:96553]
ENSMUSG00000070394	7.05425620652557	3.07808079759751	1.67450392246543	1.83820459080534	0.0660322635813629	0.136691621531526	8.17156948098178	29.6637382384782	0	0	4.49022951969339	0	Tmem256	transmembrane protein 256 [Source:MGI Symbol;Acc:MGI:1916436]
ENSMUSG00000028804	12.6431006681709	3.07588552796076	1.16220852457852	2.6465866175575	0.00813086792234811	0.0225621607207147	26.5576008131908	17.7982429430869	23.5442865485184	7.95847370422929	0	0	Csmd2	CUB and Sushi multiple domains 2 [Source:MGI Symbol;Acc:MGI:2386401]
ENSMUSG00000032540	546.228475948599	3.07415423161146	0.125242210354599	24.545672125297	4.81062722894855e-133	2.75713229707065e-131	1035.74643171444	915.620720294362	978.158086606629	111.41863185921	122.58326588763	113.843719329325	Abhd5	abhydrolase domain containing 5 [Source:MGI Symbol;Acc:MGI:1914719]
ENSMUSG00000059114	288.574061130428	3.07375064476977	0.186605380857726	16.4719293229454	5.83784408138518e-61	1.54808671301039e-59	582.224325519952	494.395637307971	470.885730970368	50.6829114848286	76.3339018347877	56.9218596646627	Lrrc74a	leucine rich repeat containing 74A [Source:MGI Symbol;Acc:MGI:3646959]
ENSMUSG00000039886	76.8182271303726	3.07303857358975	0.381153941489015	8.06246043681096	7.4773949720314e-16	6.86320009351694e-15	179.774528581599	114.699787855449	117.721432742592	22.6188200014938	18.8589639827123	7.23582961838933	Tmem120a	transmembrane protein 120A [Source:MGI Symbol;Acc:MGI:2686991]
ENSMUSG00000056692	149.079714948652	3.07088997860823	0.306353917138233	10.0239944939976	1.19570429319427e-23	1.53943833275954e-22	208.375021765035	282.794304540159	308.216114816968	21.7810859273644	52.0866624284434	21.225100213942	Ilrun	inflammation and lipid regulator with UBA-like and NBR1-like domains [Source:MGI Symbol;Acc:MGI:106281]
ENSMUSG00000021795	4.79461426796498	3.07028180263854	1.96241524666359	1.56454237086595	0.117690250594708	0.21678223439668	0	25.7085731400145	0	2.0943351853235	0	0.964777282451911	Sftpd	surfactant associated protein D [Source:MGI Symbol;Acc:MGI:109515]
[truncated: 12,830 more rows]

## Sheet: P<0.05, |FC|>1
ensembl_gene_id	baseMean	log2FoldChange	lfcSE	stat	pvalue	padj	HE1	HE2	HE3	HR1	HR2	HR3	external_gene_name	description
[truncated: 4,112 more rows]
