# Supplementary material for: Targeted mRNP-phagy licenses translational activation during cellular metamorphosis
Source: Research Square preprint supplement (doi:10.21203/rs.3.rs-6289188/v1), 2025-05-06
Supplement: Supplementary file 4 [file 6336b457e986d06958531f38.xlsx]

## Sheet: WT_ES_vs_RS
	baseMean	log2FoldChange	lfcSE	stat	pvalue	padj	WT_ES1	WT_ES2	WT_ES3	WT_RS1	WT_RS2	WT_RS3	Symbol
ENSMUST00000000058	0.231509	-1.29121	4.06281	-0.317811	0.750628	NA	0	0	0	0	0	1.38905	Cav2
ENSMUST00000000080	1.58436	2.1704	1.88128	1.15369	0.248629	NA	5.66395	1.21901	0.90856	1.02013	0	0.694526	Klf6
ENSMUST00000000109	5.62108	-0.128731	0.89237	-0.144258	0.885297	NA	6.79674	4.87603	4.5428	5.10065	4.77047	7.63978	Cntn1
ENSMUST00000000171	0.854644	-0.333979	2.73353	-0.122179	0.902758	NA	2.26558	0	0	0	2.86228	0
ENSMUST00000000188	3.15362	0.532194	1.36523	0.38982	0.69667	NA	2.26558	6.09504	2.72568	7.14091	0	0.694526	Ccnd2
ENSMUST00000000201	1.0632	-0.180408	2.13996	-0.0843045	0.932814	NA	1.13279	0	1.81712	2.04026	0	1.38905	Nalcn
ENSMUST00000000219	2.01193	-0.393447	1.57362	-0.250026	0.802567	NA	2.26558	1.21901	1.81712	0	1.90819	4.86168	Th
ENSMUST00000000253	1.49644	-1.88317	1.95555	-0.962983	0.335556	NA	0	0	1.81712	2.04026	0.954094	4.16715	Lhx2
ENSMUST00000000266	1.15296	-1.37996	2.48666	-0.554944	0.578933	NA	0	0	1.81712	5.10065	0	0	Ifi202b
ENSMUST00000000314	1.11297	1.28763	2.17649	0.591609	0.554113	NA	2.26558	2.43802	0	1.02013	0.954094	0	Cdh4
ENSMUST00000000326	5.11485	-1.76781	1.08257	-1.63297	0.102475	NA	0	1.21901	5.45136	9.18118	8.58685	6.25073	Bcl6b
ENSMUST00000000342	0.231509	-1.29121	4.06281	-0.317811	0.750628	NA	0	0	0	0	0	1.38905
ENSMUST00000000348	4.20009	-0.955528	1.11313	-0.858419	0.390661	NA	2.26558	3.65702	2.72568	1.02013	8.58685	6.94526	Rtca
ENSMUST00000000349	4.77298	-0.101357	0.991033	-0.102274	0.918539	NA	6.79674	2.43802	4.5428	3.06039	7.63275	4.16715	Dbt
ENSMUST00000000369	0.647069	-2.68909	2.98034	-0.902277	0.36691	NA	0	0	0	1.02013	2.86228	0
ENSMUST00000000395	0.682149	1.83852	2.98116	0.616713	0.537424	NA	3.39837	0	0	0	0	0.694526	Tmprss2
ENSMUST00000000430	0.685789	0.92249	2.95617	0.312056	0.754998	NA	0	0	2.72568	0	0	1.38905	Galnt1
ENSMUST00000000466	0.613296	1.57337	3.08832	0.50946	0.61043	NA	0	0	2.72568	0	0.954094	0	Plin2
ENSMUST00000000500	3.36304	-0.867098	1.2554	-0.690695	0.489757	NA	3.39837	0	3.63424	2.04026	7.63275	3.47263	Pdgfb
ENSMUST00000000543	2.12801	0.700738	1.60354	0.436994	0.662116	NA	6.79674	1.21901	0	1.02013	0.954094	2.7781	Tamalin
ENSMUST00000000573	5.96422	-0.304799	0.918545	-0.331828	0.740019	NA	7.92953	3.65702	4.5428	2.04026	8.58685	9.02883	Ovgp1
ENSMUST00000000574	0.593692	-1.04433	2.88978	-0.361389	0.717809	NA	0	1.21901	0	0	0.954094	1.38905
ENSMUST00000000579	4.64241	0.194784	1.03122	0.188886	0.850182	NA	6.79674	2.43802	5.45136	5.10065	6.67866	1.38905	Sox9
ENSMUST00000000590	0.377597	2.21781	4.02186	0.55144	0.581332	NA	2.26558	0	0	0	0	0
ENSMUST00000000641	1.38953	-2.61108	2.04222	-1.27855	0.201057	NA	0	1.21901	0	4.08052	0.954094	2.08358	Sema4f
ENSMUST00000000642	2.93663	3.21037	1.52525	2.10482	0.0353067	NA	6.79674	3.65702	5.45136	1.02013	0	0.694526	Hk2
ENSMUST00000000696	0.302853	1.9429	4.05892	0.478675	0.63217	NA	0	0	1.81712	0	0	0	Cd52
ENSMUST00000000707	0.825752	-0.187862	2.41457	-0.0778035	0.937984	NA	1.13279	1.21901	0	0	1.90819	0.694526	Loxl3
ENSMUST00000000755	4.07803	-0.917436	1.13874	-0.805655	0.420442	NA	5.66395	0	2.72568	7.14091	4.77047	4.16715	Sult5a1
ENSMUST00000000769	0.455798	-2.19032	3.39665	-0.644847	0.519026	NA	0	0	0	2.04026	0	0.694526	Serpinf1
ENSMUST00000000776	1.21463	0.209798	2.02716	0.103494	0.917571	NA	1.13279	0	2.72568	2.04026	0	1.38905	Tubgcp3
ENSMUST00000000804	4.9399	0.794971	0.965868	0.823063	0.410472	NA	7.92953	3.65702	7.26848	3.06039	2.86228	4.86168	Ddx3x
ENSMUST00000000809	4.26805	-0.293726	1.07976	-0.27203	0.785599	NA	3.39837	2.43802	5.45136	8.16104	4.77047	1.38905	Slc5a5
ENSMUST00000000811	1.90416	-0.0157973	1.71847	-0.00919268	0.992665	NA	0	4.87603	0.90856	0	2.86228	2.7781	Kcnn3
ENSMUST00000000889	2.03486	-0.254185	1.51714	-0.167542	0.866944	NA	3.39837	1.21901	0.90856	4.08052	1.90819	0.694526	Il4
ENSMUST00000000894	0.977179	0.317167	2.12477	0.149271	0.88134	NA	1.13279	1.21901	0.90856	0	1.90819	0.694526	E2f1
ENSMUST00000000896	2.33648	0.955043	1.46498	0.651914	0.514457	NA	1.13279	3.65702	4.5428	0	1.90819	2.7781	Pxmp4
ENSMUST00000000926	1.0986	1.2664	2.20326	0.574785	0.565437	NA	3.39837	1.21901	0	1.02013	0.954094	0	Vpreb3
ENSMUST00000000958	5.82852	0.57613	0.921159	0.62544	0.531682	NA	3.39837	8.53306	9.0856	5.10065	1.90819	6.94526	Top1mt
ENSMUST00000000984	0.27477	-1.47986	4.0465	-0.365714	0.714579	NA	0	0	0	0	0.954094	0.694526
ENSMUST00000001002	0.267181	0.297402	4.08047	0.0728841	0.941898	NA	0	0	0.90856	0	0	0.694526
ENSMUST00000001059	1.59711	-0.846231	1.747	-0.484391	0.628108	NA	2.26558	1.21901	0	3.06039	0.954094	2.08358	Ern1
ENSMUST00000001122	0.755194	3.21842	3.0661	1.04968	0.293865	NA	4.53116	0	0	0	0	0
ENSMUST00000001130	0.285776	-1.52701	4.04209	-0.377777	0.705596	NA	0	0	0	1.02013	0	0.694526
ENSMUST00000001156	0.624302	1.57393	3.06892	0.512861	0.608048	NA	0	0	2.72568	1.02013	0	0
ENSMUST00000001181	1.36067	0.929776	1.96903	0.472201	0.636783	NA	2.26558	1.21901	1.81712	0	2.86228	0	Col6a2
ENSMUST00000001204	0.717822	3.15271	2.86497	1.10043	0.271144	NA	3.39837	0	0.90856	0	0	0	Calm1
ENSMUST00000001253	4.00345	-1.09581	1.19921	-0.913777	0.360834	NA	6.79674	0	0.90856	4.08052	6.67866	5.5562	Slc26a4
ENSMUST00000001254	1.11633	1.33708	2.31918	0.57653	0.564257	NA	1.13279	3.65702	0	0	1.90819	0
ENSMUST00000001327	0.809502	-1.74105	2.58906	-0.672464	0.501288	NA	0	0	0.90856	2.04026	1.90819	0	Itgb7
ENSMUST00000001339	0.340044	-1.7522	4.02287	-0.435559	0.663156	NA	0	0	0	2.04026	0	0	Rrp15
ENSMUST00000001439	3.70208	0.442992	1.08308	0.409011	0.682531	NA	3.39837	4.87603	4.5428	3.06039	2.86228	3.47263	Ube2c
ENSMUST00000001456	1.28426	0.210806	1.87967	0.112151	0.910704	NA	2.26558	0	1.81712	1.02013	1.90819	0.694526	Tmem79
ENSMUST00000001460	2.72491	0.488209	1.27662	0.382423	0.702148	NA	2.26558	3.65702	3.63424	3.06039	0.954094	2.7781	Snd1
ENSMUST00000001484	1.56707	0.47995	1.76141	0.27248	0.785253	NA	1.13279	2.43802	1.81712	3.06039	0.954094	0	Tbx21
ENSMUST00000001562	1.71895	1.53066	1.85821	0.823726	0.410095	NA	0	1.21901	6.35992	2.04026	0	0.694526	Tulp3
ENSMUST00000001595	1.87726	2.3286	1.87315	1.24315	0.213814	NA	1.13279	7.31405	0.90856	0	1.90819	0	Fkbp10
ENSMUST00000001619	4.55321	0.540633	1.09139	0.49536	0.620346	NA	3.39837	10.9711	1.81712	7.14091	1.90819	2.08358	Ergic1
ENSMUST00000001620	3.52631	1.89885	1.26769	1.49788	0.134164	NA	2.26558	2.43802	11.8113	2.04026	1.90819	0.694526	Fxr1
ENSMUST00000001626	0.677742	0.417973	2.62013	0.159524	0.873256	NA	1.13279	1.21901	0	1.02013	0	0.694526
ENSMUST00000001631	1.69168	-0.639037	1.66975	-0.382714	0.701931	NA	1.13279	0	2.72568	2.04026	2.86228	1.38905	Acap1
ENSMUST00000001652	1.49332	0.449179	1.80072	0.249444	0.803017	NA	1.13279	1.21901	2.72568	1.02013	2.86228	0	Bdkrb2
ENSMUST00000001667	0.95107	-3.27271	2.3745	-1.37827	0.16812	NA	0	0	0	1.02013	1.90819	2.7781	Csn3
ENSMUST00000001672	2.18206	0.432446	1.423	0.303898	0.761206	NA	2.26558	2.43802	2.72568	3.06039	1.90819	0.694526	Ifrd1
ENSMUST00000001675	1.95463	-0.0118838	1.59076	-0.00747051	0.994039	NA	0	1.21901	4.5428	1.02013	2.86228	2.08358	Stk38l
ENSMUST00000001699	0.302853	1.9429	4.05892	0.478675	0.63217	NA	0	0	1.81712	0	0	0
ENSMUST00000001700	0.676851	-1.30963	2.77283	-0.472306	0.636708	NA	1.13279	0	0	1.02013	1.90819	0	Hoxc13
ENSMUST00000001706	0.391966	2.26108	3.62965	0.622948	0.533318	NA	1.13279	1.21901	0	0	0	0	Hoxc9
ENSMUST00000001716	2.278	-0.146558	1.52635	-0.0960186	0.923506	NA	5.66395	0	0.90856	1.02013	1.90819	4.16715	Ddt
ENSMUST00000001720	2.56156	2.84698	1.62628	1.75061	0.0800128	NA	4.53116	2.43802	6.35992	2.04026	0	0	Tat
ENSMUST00000001722	0.433786	-2.12941	3.45939	-0.615545	0.538195	NA	0	0	0	0	1.90819	0.694526
ENSMUST00000001780	4.13164	0.322938	1.05418	0.30634	0.759346	NA	2.26558	6.09504	5.45136	2.04026	4.77047	4.16715	Akt1
ENSMUST00000001792	0.318031	-1.66737	4.02977	-0.413763	0.679048	NA	0	0	0	0	1.90819	0	Il16
ENSMUST00000001809	4.60386	0.757023	0.999084	0.757717	0.44862	NA	4.53116	3.65702	9.0856	3.06039	3.81638	3.47263	Pabpc1
ENSMUST00000001825	5.96354	-1.4755	0.974253	-1.5145	0.1299	NA	2.26558	2.43802	4.5428	13.2617	10.495	2.7781	Chordc1
ENSMUST00000001845	0.658966	-1.22343	2.79502	-0.43772	0.66159	NA	0	1.21901	0	2.04026	0	0.694526	Capns1
ENSMUST00000001867	1.1981	-0.288136	2.08971	-0.137883	0.890333	NA	2.26558	0	0.90856	3.06039	0.954094	0	Evx2
ENSMUST00000001884	3.76502	-0.279782	1.16693	-0.239759	0.810517	NA	2.26558	6.09504	1.81712	8.16104	2.86228	1.38905	Clpb
ENSMUST00000001900	0.727784	1.81397	2.70585	0.670387	0.502611	NA	0	2.43802	0.90856	1.02013	0	0	Zdhhc4
ENSMUST00000001920	2.14205	-0.519504	1.54754	-0.335697	0.737099	NA	1.13279	2.43802	1.81712	0	1.90819	5.5562	Aif1l
ENSMUST00000001921	0.231509	-1.29121	4.06281	-0.317811	0.750628	NA	0	0	0	0	0	1.38905	Cpa3
ENSMUST00000001965	4.01588	-1.74874	1.15339	-1.51618	0.129474	NA	2.26558	2.43802	0.90856	4.08052	9.54094	4.86168	Kcnh6
ENSMUST00000001974	1.48163	-1.0914	2.02794	-0.538181	0.590452	NA	0	0	2.72568	4.08052	0	2.08358	Trmt1
ENSMUST00000001984	0.302853	1.9429	4.05892	0.478675	0.63217	NA	0	0	1.81712	0	0	0
ENSMUST00000001989	0.318922	0.297401	3.97047	0.0749034	0.940292	NA	0	1.21901	0	0	0	0.694526	Uba1
ENSMUST00000002007	1.36834	2.99255	2.05259	1.45794	0.144858	NA	1.13279	3.65702	2.72568	0	0	0.694526
ENSMUST00000002011	0.285776	-1.52701	4.04209	-0.377777	0.705596	NA	0	0	0	1.02013	0	0.694526	Esam
ENSMUST00000002029	3.28564	-1.23096	1.27234	-0.967477	0.333305	NA	1.13279	0	4.5428	5.10065	4.77047	4.16715	Emd
ENSMUST00000002043	5.88553	0.586848	0.923254	0.63563	0.525018	NA	7.92953	6.09504	7.26848	6.12078	0.954094	6.94526	Ccdc47
ENSMUST00000002048	5.44754	1.99138	0.987109	2.01738	0.0436555	NA	10.1951	6.09504	9.99416	1.02013	1.90819	3.47263	Taco1
ENSMUST00000002063	5.77417	0.243296	0.897194	0.271174	0.786257	NA	4.53116	9.75206	4.5428	7.14091	3.81638	4.86168	Ap4e1
ENSMUST00000002064	2.0777	-0.313926	1.55591	-0.201764	0.840101	NA	2.26558	2.43802	0.90856	0	4.77047	2.08358	Blvra
ENSMUST00000002073	0.881625	-0.91319	2.69286	-0.339116	0.734522	NA	0	0	1.81712	0	0	3.47263	Ltbp2
ENSMUST00000002080	0.477047	-2.25463	3.65591	-0.616709	0.537427	NA	0	0	0	0	2.86228	0	Pdzd4
ENSMUST00000002128	0.310442	0.297402	4.01182	0.0741313	0.940906	NA	0	0	0.90856	0	0.954094	0	Rab34
ENSMUST00000002152	2.09827	-1.53377	1.51602	-1.0117	0.311679	NA	1.13279	1.21901	0.90856	2.04026	3.81638	3.47263	Bbc3
ENSMUST00000002275	0.706634	0.223846	2.74624	0.08151	0.935036	NA	2.26558	0	0	1.02013	0.954094	0	Vrk3
ENSMUST00000002320	0.592801	-2.57622	3.07131	-0.838802	0.401581	NA	0	0	0	0	2.86228	0.694526	Ppard
ENSMUST00000002344	0.347263	-1.8428	4.01591	-0.458875	0.646324	NA	0	0	0	0	0	2.08358
ENSMUST00000002360	0.347263	-1.8428	4.01591	-0.458875	0.646324	NA	0	0	0	0	0	2.08358
ENSMUST00000002379	0.304553	0.297402	4.04158	0.0735855	0.94134	NA	1.13279	0	0	0	0	0.694526	Cd320
ENSMUST00000002418	2.66172	0.515014	1.44456	0.356519	0.721452	NA	1.13279	0	8.17704	1.02013	2.86228	2.7781	Borcs8
ENSMUST00000002469	0.609504	2.89514	3.32533	0.870633	0.383955	NA	0	3.65702	0	0	0	0
ENSMUST00000002532	0.493351	1.2522	3.36281	0.372367	0.70962	NA	2.26558	0	0	0	0	0.694526
ENSMUST00000002640	1.51614	-0.859773	1.90349	-0.451683	0.651497	NA	2.26558	0	0.90856	3.06039	2.86228	0	Scin
ENSMUST00000002663	0.302853	1.9429	4.05892	0.478675	0.63217	NA	0	0	1.81712	0	0	0
ENSMUST00000002677	1.38617	-2.62334	2.17382	-1.20678	0.227516	NA	1.13279	0	0	5.10065	0	2.08358	Axl
ENSMUST00000002678	2.44838	0.848732	1.45302	0.584116	0.559142	NA	0	4.87603	4.5428	1.02013	2.86228	1.38905	Tgfb1
ENSMUST00000002710	0.52209	1.33764	3.29509	0.405951	0.684779	NA	0	2.43802	0	0	0	0.694526	Pdcd2l
ENSMUST00000002735	5.32647	0.746483	0.965671	0.77302	0.439511	NA	4.53116	7.31405	8.17704	6.12078	0.954094	4.86168	Clpp
ENSMUST00000002740	2.20226	-0.26425	1.52351	-0.173448	0.862299	NA	1.13279	1.21901	3.63424	3.06039	0	4.16715	Pspn
ENSMUST00000002809	1.21688	0.577728	2.07481	0.278449	0.780668	NA	3.39837	0	0.90856	2.04026	0.954094	0	Fkbp7
ENSMUST00000002837	2.23028	-0.950047	1.61616	-0.587841	0.556639	NA	2.26558	2.43802	0	0	3.81638	4.86168	Tmed5
ENSMUST00000002845	0.362184	0.297401	3.78278	0.0786196	0.937335	NA	0	1.21901	0	0	0.954094	0
ENSMUST00000002846	0.27477	-1.47986	4.0465	-0.365714	0.714579	NA	0	0	0	0	0.954094	0.694526
ENSMUST00000002850	0.304553	0.297402	4.04158	0.0735855	0.94134	NA	1.13279	0	0	0	0	0.694526	Abcc6
ENSMUST00000002855	0.560546	-2.50395	2.88511	-0.867888	0.385456	NA	0	0	0	1.02013	0.954094	1.38905
ENSMUST00000002925	2.97991	0.333656	1.24859	0.267227	0.789294	NA	4.53116	3.65702	1.81712	1.02013	4.77047	2.08358	Timmdc1
ENSMUST00000002926	3.56131	2.31387	1.24485	1.85876	0.0630618	NA	6.79674	7.31405	3.63424	1.02013	1.90819	0.694526	Pla1a
ENSMUST00000002976	1.77409	0.635802	1.61849	0.392837	0.69444	NA	2.26558	2.43802	1.81712	2.04026	0	2.08358	Il17ra
ENSMUST00000002979	0.928579	2.27379	2.4963	0.910862	0.362368	NA	3.39837	1.21901	0	0	0.954094	0	Lamb1
ENSMUST00000002989	0.7816	-1.61307	2.63225	-0.612809	0.540003	NA	1.13279	0	0	0	2.86228	0.694526
ENSMUST00000003049	1.68581	0.832096	1.97595	0.421112	0.673674	NA	0	0	6.35992	3.06039	0	0.694526	Med25
ENSMUST00000003061	1.58689	1.96423	2.03961	0.963045	0.335525	NA	5.66395	0	1.81712	2.04026	0	0	Bcam
ENSMUST00000003100	0.377597	2.21781	4.02186	0.55144	0.581332	NA	2.26558	0	0	0	0	0	Cyp2f2
ENSMUST00000003123	1.12501	-2.2412	2.20857	-1.01478	0.310212	NA	0	1.21901	0	1.02013	3.81638	0.694526	Fam32a
ENSMUST00000003154	0.45428	2.52164	3.71856	0.678124	0.497693	NA	0	0	2.72568	0	0	0	Efna2
ENSMUST00000003203	1.97147	0.439147	1.70822	0.257078	0.797118	NA	5.66395	1.21901	0	0	2.86228	2.08358	Cdk12
ENSMUST00000003238	2.43194	2.14668	1.63501	1.31294	0.189201	NA	0	7.31405	4.5428	2.04026	0	0.694526	Foxj2
ENSMUST00000003274	0.437203	-0.565682	3.25416	-0.173833	0.861996	NA	0	0	0.90856	1.02013	0	0.694526	Ebi3
ENSMUST00000003284	0.470349	1.17392	3.17213	0.370074	0.711327	NA	0	1.21901	0.90856	0	0	0.694526	Irf3
ENSMUST00000003319	1.46713	1.92806	1.98296	0.972312	0.330895	NA	1.13279	1.21901	4.5428	0	1.90819	0	Abcf3
ENSMUST00000003369	2.19665	0.641133	1.53283	0.418267	0.675752	NA	5.66395	2.43802	0	2.04026	0.954094	2.08358	Plag1
ENSMUST00000003386	1.16435	-3.55157	2.19483	-1.61815	0.105629	NA	0	0	0	2.04026	2.86228	2.08358	Mrpl4
ENSMUST00000003438	5.23346	0.269632	1.04893	0.257054	0.797137	NA	3.39837	4.87603	9.0856	1.02013	1.90819	11.1124	Mob3a
ENSMUST00000003451	1.10665	1.59117	2.16685	0.734324	0.462751	NA	2.26558	0	2.72568	0	0.954094	0.694526
ENSMUST00000003461	0.839466	2.12746	2.54906	0.834607	0.403939	NA	2.26558	0	1.81712	0	0.954094	0	Ogdh
ENSMUST00000003469	2.78192	0.51284	1.39265	0.368247	0.712689	NA	6.79674	1.21901	1.81712	4.08052	0	2.7781	Cd79a
ENSMUST00000003513	4.91814	-0.123629	1.04397	-0.118421	0.905734	NA	2.26558	3.65702	8.17704	6.12078	0.954094	8.33431	Nosip
ENSMUST00000003521	0.340225	2.08636	3.83303	0.54431	0.586228	NA	1.13279	0	0.90856	0	0	0	Rps11
ENSMUST00000003554	3.29911	0.166565	1.15425	0.144306	0.885259	NA	2.26558	3.65702	4.5428	2.04026	3.81638	3.47263	Casq1
ENSMUST00000003561	0.735373	0.301719	2.7098	0.111344	0.911344	NA	0	2.43802	0	1.02013	0.954094	0
ENSMUST00000003568	0.517836	-0.732797	3.07041	-0.238664	0.811366	NA	1.13279	0	0	1.02013	0.954094	0	Crhr2
ENSMUST00000003569	3.44141	0.949557	1.17032	0.811367	0.417155	NA	4.53116	7.31405	1.81712	2.04026	2.86228	2.08358	Inmt
ENSMUST00000003574	1.70174	-2.07895	1.94322	-1.06985	0.284687	NA	0	0	1.81712	1.02013	6.67866	0.694526
ENSMUST00000003612	0.577623	0.186079	2.94563	0.0631714	0.94963	NA	0	0	1.81712	0	0.954094	0.694526
ENSMUST00000003622	1.20947	3.91229	2.35649	1.66022	0.096871	NA	4.53116	0	2.72568	0	0	0	Slc25a1
ENSMUST00000003635	3.65003	1.71727	1.2073	1.42241	0.154908	NA	10.1951	4.87603	1.81712	1.02013	1.90819	2.08358	Ier3
ENSMUST00000003655	0.76852	1.92484	2.86418	0.672037	0.50156	NA	0	3.65702	0	0	0.954094	0	As3mt
ENSMUST00000003714	5.15132	-0.722977	0.937751	-0.770969	0.440726	NA	3.39837	3.65702	4.5428	6.12078	7.63275	5.5562	Cp
ENSMUST00000003720	0.437203	-0.565682	3.25416	-0.173833	0.861996	NA	0	0	0.90856	1.02013	0	0.694526	Crot
ENSMUST00000003762	3.07232	0.027489	1.28333	0.0214201	0.982911	NA	5.66395	0	3.63424	3.06039	1.90819	4.16715	Has1
ENSMUST00000003843	0.304553	0.297402	4.04158	0.0735855	0.94134	NA	1.13279	0	0	0	0	0.694526	Man1a
ENSMUST00000003911	1.0856	-2.2404	2.3335	-0.960103	0.337003	NA	1.13279	0	0	0	1.90819	3.47263
ENSMUST00000003947	0.517836	-0.732797	3.07041	-0.238664	0.811366	NA	1.13279	0	0	1.02013	0.954094	0	Nqo1
ENSMUST00000003964	0.595134	2.86151	3.07828	0.929581	0.352588	NA	1.13279	2.43802	0	0	0	0	Gys1
ENSMUST00000004051	0.377597	2.21781	4.02186	0.55144	0.581332	NA	2.26558	0	0	0	0	0	Hlf
ENSMUST00000004054	5.23239	-1.26302	1.03325	-1.22237	0.221567	NA	0	3.65702	5.45136	9.18118	4.77047	8.33431	Kpna1
ENSMUST00000004057	0.285776	-1.52701	4.04209	-0.377777	0.705596	NA	0	0	0	1.02013	0	0.694526	Fam162a
ENSMUST00000004076	0.741574	-2.89666	2.80511	-1.03264	0.301774	NA	0	0	0	3.06039	0	1.38905	Grm3
ENSMUST00000004136	0.477047	-2.25463	3.65591	-0.616709	0.537427	NA	0	0	0	0	2.86228	0	Gstm3
ENSMUST00000004137	1.45601	0.82273	1.81445	0.453432	0.650237	NA	1.13279	3.65702	0.90856	0	0.954094	2.08358	Gstm7
ENSMUST00000004201	0.420307	-0.339649	3.57139	-0.0951027	0.924233	NA	1.13279	0	0	0	0	1.38905	Col5a3
ENSMUST00000004203	0.455798	-2.19032	3.39665	-0.644847	0.519026	NA	0	0	0	2.04026	0	0.694526	Ppan
ENSMUST00000004327	1.00255	0.318907	2.10946	0.15118	0.879834	NA	0	2.43802	0.90856	1.02013	0.954094	0.694526	G6pdx
ENSMUST00000004343	0.676043	1.70182	2.76882	0.614636	0.538795	NA	0	1.21901	1.81712	1.02013	0	0	Wars2
ENSMUST00000004379	0.795078	-2.99235	3.01702	-0.991823	0.321284	NA	0	0	0	0	4.77047	0
ENSMUST00000004396	2.45812	1.11649	1.5078	0.740478	0.45901	NA	0	7.31405	2.72568	3.06039	0.954094	0.694526	Atp6v1f
ENSMUST00000004428	1.41102	-0.0739239	1.79061	-0.0412842	0.967069	NA	2.26558	0	1.81712	2.04026	0.954094	1.38905	Clcn5
ENSMUST00000004560	1.58717	1.16004	1.8473	0.627968	0.530025	NA	3.39837	2.43802	0.90856	0	0	2.7781	Bid
ENSMUST00000004565	3.2619	3.51416	1.55461	2.26048	0.0237913	NA	4.53116	3.65702	9.99416	0	0	1.38905	Ralb
ENSMUST00000004574	4.67742	-0.16987	0.980426	-0.173261	0.862446	NA	5.66395	4.87603	2.72568	6.12078	3.81638	4.86168	Dnajb11
ENSMUST00000004655	1.8058	-0.0605542	1.56269	-0.03875	0.96909	NA	1.13279	2.43802	1.81712	1.02013	0.954094	3.47263	Psg17
ENSMUST00000004657	1.77364	-0.582508	1.75948	-0.331068	0.740593	NA	3.39837	0	0.90856	0	2.86228	3.47263	Psg19
ENSMUST00000004729	1.82692	-0.695162	1.55894	-0.44592	0.655655	NA	1.13279	1.21901	1.81712	3.06039	0.954094	2.7781	Etfb
ENSMUST00000004749	1.18713	1.69337	2.12881	0.795455	0.426349	NA	0	3.65702	1.81712	0	0.954094	0.694526	Pcp2
ENSMUST00000004756	2.63407	-0.181614	1.27688	-0.142232	0.886896	NA	2.26558	2.43802	2.72568	2.04026	2.86228	3.47263	Wwox
ENSMUST00000004774	0.900771	-0.701747	2.20227	-0.318648	0.749994	NA	1.13279	0	0.90856	1.02013	0.954094	1.38905	Aqp1
ENSMUST00000004784	3.03416	-1.35231	1.26837	-1.06618	0.286344	NA	1.13279	1.21901	2.72568	3.06039	3.81638	6.25073	Cnn2
ENSMUST00000004868	4.22221	-0.421771	1.04527	-0.403506	0.686576	NA	2.26558	4.87603	3.63424	5.10065	6.67866	2.7781	Mtfp1
ENSMUST00000004910	0.340225	2.08636	3.83303	0.54431	0.586228	NA	1.13279	0	0.90856	0	0	0	Eif2b2
ENSMUST00000004943	0.329037	-1.70869	3.88407	-0.439924	0.659992	NA	0	0	0	1.02013	0.954094	0	Tmed11
ENSMUST00000004949	0.704384	-0.355905	2.70938	-0.13136	0.89549	NA	0	0	1.81712	1.02013	0	1.38905	Traf6
ENSMUST00000004959	0.78838	-0.290958	2.45271	-0.118627	0.905571	NA	0	1.21901	0.90856	0	1.90819	0.694526	Grap
ENSMUST00000004964	1.14955	-2.34254	2.31704	-1.01101	0.312013	NA	0	0	0.90856	4.08052	1.90819	0	Pou1f1
ENSMUST00000004965	1.45845	-1.53317	2.00159	-0.765977	0.44369	NA	2.26558	0	0	1.02013	4.77047	0.694526	Chmp2b
ENSMUST00000004968	1.43658	1.33789	1.81502	0.737121	0.461049	NA	2.26558	1.21901	2.72568	1.02013	0	1.38905	Plod3
ENSMUST00000004985	3.15012	0.00363724	1.34981	0.00269462	0.99785	NA	0	1.21901	8.17704	2.04026	1.90819	5.5562	Brpf3
ENSMUST00000005003	1.10116	3.76299	2.27937	1.65089	0.0987608	NA	1.13279	3.65702	1.81712	0	0	0	Lbr
ENSMUST00000005066	2.70499	0.472797	1.44147	0.327997	0.742914	NA	1.13279	0	8.17704	1.02013	3.81638	2.08358	Map2k1
ENSMUST00000005234	2.14748	-1.15157	1.52217	-0.756534	0.449329	NA	1.13279	0	2.72568	4.08052	2.86228	2.08358	Wdr1
ENSMUST00000005255	1.45998	3.02732	2.00265	1.51166	0.130622	NA	2.26558	3.65702	1.81712	1.02013	0	0	Ccn4
ENSMUST00000005256	0.760532	1.08757	2.64763	0.410773	0.681239	NA	2.26558	0	0.90856	0	0	1.38905	Ndrg1
ENSMUST00000005262	2.1609	3.69191	1.80498	2.0454	0.0408158	NA	6.79674	3.65702	1.81712	0	0	0.694526	4930550C14Rik
ENSMUST00000005279	2.30105	-1.56167	1.74561	-0.89463	0.370985	NA	1.13279	2.43802	0	0	9.54094	0.694526	Klf5
ENSMUST00000005336	0.885317	2.2744	2.53337	0.897778	0.369304	NA	3.39837	1.21901	0	0	0	0.694526	Senp3
ENSMUST00000005352	1.07242	3.73194	2.2955	1.62577	0.103999	NA	3.39837	1.21901	1.81712	0	0	0	Corin
ENSMUST00000005399	0.695628	0.257932	2.95784	0.087203	0.93051	NA	2.26558	0	0	0	1.90819	0
ENSMUST00000005431	5.45029	-0.329053	0.955618	-0.344335	0.730594	NA	1.13279	6.09504	7.26848	5.10065	4.77047	8.33431	Letm1
ENSMUST00000005452	4.42179	0.0557034	1.05223	0.0529383	0.957781	NA	6.79674	4.87603	1.81712	7.14091	3.81638	2.08358	Fgfr4
ENSMUST00000005490	1.32616	0.635296	1.97982	0.320886	0.748297	NA	0	1.21901	3.63424	1.02013	0	2.08358	Slc1a6
ENSMUST00000005507	0.506021	2.65898	3.26163	0.815231	0.41494	NA	0	1.21901	1.81712	0	0	0	Mlxipl
ENSMUST00000005532	1.66527	1.44652	1.83125	0.78991	0.42958	NA	4.53116	0	2.72568	2.04026	0	0.694526	Nid1
ENSMUST00000005548	2.13431	-1.53474	1.55636	-0.986108	0.32408	NA	1.13279	1.21901	0.90856	4.08052	4.77047	0.694526	Hmox1
ENSMUST00000005600	5.1173	0.757065	1.04992	0.721066	0.470869	NA	11.3279	7.31405	0.90856	2.04026	2.86228	6.25073	Rfx1
ENSMUST00000005630	0.318922	0.297401	3.97047	0.0749034	0.940292	NA	0	1.21901	0	0	0	0.694526	Msh4
ENSMUST00000005647	5.26056	0.156013	0.944024	0.165264	0.868736	NA	4.53116	8.53306	3.63424	7.14091	2.86228	4.86168	Ndufs3
ENSMUST00000005678	0.444792	-2.15932	3.16428	-0.682403	0.494984	NA	0	0	0	1.02013	0.954094	0.694526	Fcer2a
ENSMUST00000005798	1.71786	-1.9653	1.77352	-1.10814	0.267803	NA	1.13279	0	0.90856	3.06039	3.81638	1.38905	Snx6
ENSMUST00000005810	1.4746	0.170433	1.80648	0.0943452	0.924835	NA	1.13279	3.65702	0	1.02013	0.954094	2.08358	Mthfd2
ENSMUST00000005862	0.695077	-1.4229	2.7267	-0.521837	0.601784	NA	1.13279	0	0	0	0.954094	2.08358	Tfap4
ENSMUST00000005907	1.31656	-3.75838	2.3482	-1.60054	0.109479	NA	0	0	0	0	0.954094	6.94526	Cd247
ENSMUST00000005923	2.61608	0.964966	1.34123	0.719465	0.471855	NA	4.53116	1.21901	4.5428	3.06039	0.954094	1.38905	Psmb4
ENSMUST00000005952	5.6277	0.39109	0.897714	0.435651	0.66309	NA	7.92953	4.87603	6.35992	3.06039	6.67866	4.86168	Slc30a4
ENSMUST00000005954	0.377597	2.21781	4.02186	0.55144	0.581332	NA	2.26558	0	0	0	0	0
ENSMUST00000005976	2.43679	-0.152372	1.43535	-0.106156	0.915458	NA	1.13279	4.87603	0.90856	5.10065	1.90819	0.694526	Tnfsf14
ENSMUST00000006027	1.57475	1.20102	2.00535	0.598908	0.549234	NA	0	1.21901	5.45136	0	0	2.7781	Reep5
ENSMUST00000006046	4.13382	-0.951036	1.19554	-0.795489	0.426329	NA	0	4.87603	3.63424	1.02013	7.63275	7.63978	Trh
ENSMUST00000006104	2.51424	0.637296	1.464	0.435312	0.663336	NA	4.53116	3.65702	0.90856	4.08052	1.90819	0	P2rx5
ENSMUST00000006112	0.990529	-2.08949	2.45238	-0.852024	0.394201	NA	0	0	0.90856	4.08052	0.954094	0	Ephb3
ENSMUST00000006286	1.27288	1.75711	2.09046	0.840534	0.400609	NA	2.26558	3.65702	0	1.02013	0	0.694526	Inpp5k
ENSMUST00000006311	1.00931	-0.909448	2.27007	-0.400626	0.688696	NA	1.13279	0	0.90856	3.06039	0.954094	0	Tead4
ENSMUST00000006341	0.687858	-1.3355	2.75911	-0.484033	0.628362	NA	1.13279	0	0	2.04026	0.954094	0	Prss16
ENSMUST00000006377	0.831877	3.37989	2.68583	1.25842	0.208242	NA	2.26558	0	2.72568	0	0	0	Zbtb17
ENSMUST00000006380	4.62713	2.03824	1.13998	1.78797	0.0737812	NA	6.79674	4.87603	10.9027	1.02013	0	4.16715	Fam131c
ENSMUST00000006391	0.231509	-1.29121	4.06281	-0.317811	0.750628	NA	0	0	0	0	0	1.38905
ENSMUST00000006397	3.11781	-1.20542	1.37964	-0.873716	0.382273	NA	4.53116	1.21901	0	7.14091	0.954094	4.86168	Epor
ENSMUST00000006415	3.29036	0.304528	1.19437	0.254969	0.798747	NA	4.53116	3.65702	2.72568	1.02013	5.72456	2.08358	Plcb2
ENSMUST00000006431	5.04666	-0.0725041	0.966586	-0.0750105	0.940206	NA	2.26558	6.09504	6.35992	7.14091	2.86228	5.5562	Atp6v1b1
ENSMUST00000006462	5.55744	-0.1928	0.909588	-0.211964	0.832135	NA	6.79674	6.09504	2.72568	7.14091	5.72456	4.86168	Aamp
ENSMUST00000006476	0.672626	0.186644	2.79296	0.0668267	0.94672	NA	0	1.21901	0.90856	0	1.90819	0	Upk1a
ENSMUST00000006544	0.51361	1.17398	3.07947	0.381228	0.703034	NA	0	1.21901	0.90856	0	0.954094	0	Gcat
ENSMUST00000006578	2.49788	-0.793189	1.36525	-0.580987	0.561249	NA	3.39837	1.21901	0.90856	4.08052	1.90819	3.47263	Nectin4
ENSMUST00000006579	0.318031	-1.66737	4.02977	-0.413763	0.679048	NA	0	0	0	0	1.90819	0
ENSMUST00000006587	1.97227	-1.40485	1.66231	-0.845121	0.398043	NA	1.13279	1.21901	0.90856	5.10065	0	3.47263	Peds1
ENSMUST00000006611	0.524616	1.17399	3.05781	0.383933	0.701028	NA	0	1.21901	0.90856	1.02013	0	0	Srm
ENSMUST00000006618	0.35882	0.297401	3.79607	0.0783444	0.937554	NA	1.13279	0	0	1.02013	0	0
ENSMUST00000006625	1.58992	0.629386	1.88815	0.333334	0.738882	NA	0	4.87603	0.90856	3.06039	0	0.694526	Rbm14
ENSMUST00000006626	3.91314	-0.167366	1.21937	-0.137257	0.890828	NA	4.53116	0	6.35992	8.16104	0.954094	3.47263	Actn3
ENSMUST00000006716	1.4264	1.84407	2.02815	0.909238	0.363224	NA	1.13279	0	5.45136	1.02013	0.954094	0	Wnt6
ENSMUST00000006718	0.561988	1.28955	2.98738	0.431666	0.665984	NA	1.13279	1.21901	0	1.02013	0	0	Wnt10a
ENSMUST00000006762	2.73854	0.022326	1.35146	0.0165199	0.98682	NA	4.53116	0	3.63424	3.06039	3.81638	1.38905	Snai3
ENSMUST00000006818	0.657448	3.0418	2.95178	1.0305	0.302778	NA	0	1.21901	2.72568	0	0	0	Tcf23
ENSMUST00000006853	1.77757	1.51375	1.82407	0.829878	0.406608	NA	1.13279	1.21901	5.45136	0	2.86228	0	P4htm
ENSMUST00000006856	1.53491	-0.151903	1.88078	-0.0807658	0.935628	NA	3.39837	0	0.90856	2.04026	2.86228	0	Pola1
ENSMUST00000006898	0.318922	0.297401	3.97047	0.0749034	0.940292	NA	0	1.21901	0	0	0	0.694526
ENSMUST00000006900	4.84129	1.21677	1.0558	1.15247	0.249129	NA	1.13279	10.9711	8.17704	4.08052	1.90819	2.7781	Acot13
ENSMUST00000006912	0.550982	1.28995	3.00687	0.429001	0.667922	NA	1.13279	1.21901	0	0	0.954094	0	Pip4k2a
ENSMUST00000006915	0.637845	0.681635	3.0575	0.222939	0.823583	NA	0	2.43802	0	0	0	1.38905	Mettl1
ENSMUST00000006949	4.60878	-0.151735	0.992277	-0.152916	0.878465	NA	6.79674	3.65702	2.72568	5.10065	3.81638	5.5562	Tph2
ENSMUST00000006952	0.657448	3.0418	2.95178	1.0305	0.302778	NA	0	1.21901	2.72568	0	0	0
ENSMUST00000006963	4.12961	0.515961	1.14251	0.451603	0.651555	NA	2.26558	4.87603	7.26848	2.04026	7.63275	0.694526	Krt28
ENSMUST00000006969	1.11994	-1.31488	2.29981	-0.571734	0.567502	NA	0	0	1.81712	2.04026	2.86228	0	Krt23
ENSMUST00000006976	0.622033	-2.67368	3.0064	-0.889329	0.373826	NA	0	0	0	0	0.954094	2.7781	Odad4
ENSMUST00000006991	2.83953	-1.08659	1.34697	-0.806693	0.419844	NA	0	3.65702	1.81712	3.06039	5.72456	2.7781	Hcn1
ENSMUST00000007005	0.318031	-1.66737	4.02977	-0.413763	0.679048	NA	0	0	0	0	1.90819	0
ENSMUST00000007012	2.99469	-1.31253	1.28745	-1.01948	0.307975	NA	1.13279	1.21901	2.72568	6.12078	1.90819	4.86168	Sod2
ENSMUST00000007046	2.71341	0.593507	1.41013	0.420888	0.673837	NA	0	6.09504	3.63424	2.04026	3.81638	0.694526	Tmco6
ENSMUST00000007156	3.12699	0.421986	1.18412	0.356372	0.721562	NA	3.39837	3.65702	3.63424	4.08052	1.90819	2.08358	Klk1b11
ENSMUST00000007245	3.28987	-1.33745	1.2651	-1.05719	0.290426	NA	2.26558	2.43802	0.90856	9.18118	2.86228	2.08358	Vwa7
ENSMUST00000007255	0.302853	1.9429	4.05892	0.478675	0.63217	NA	0	0	1.81712	0	0	0
ENSMUST00000007257	3.50645	-0.194102	1.17155	-0.165679	0.86841	NA	2.26558	4.87603	2.72568	1.02013	6.67866	3.47263	Clic1
ENSMUST00000007708	0.717822	3.15271	2.86497	1.10043	0.271144	NA	3.39837	0	0.90856	0	0	0	Ppp2r1a
ENSMUST00000007790	4.02866	0.389402	1.14533	0.339992	0.733863	NA	4.53116	8.53306	0.90856	2.04026	1.90819	6.25073	Rad51c
ENSMUST00000007803	0.637845	0.681635	3.0575	0.222939	0.823583	NA	0	2.43802	0	0	0	1.38905
ENSMUST00000008016	0.647069	-2.68909	2.98034	-0.902277	0.36691	NA	0	0	0	1.02013	2.86228	0
ENSMUST00000008021	0.329037	-1.70869	3.88407	-0.439924	0.659992	NA	0	0	0	1.02013	0.954094	0	Tcap
ENSMUST00000008032	1.12941	-1.00926	2.30431	-0.437988	0.661395	NA	2.26558	0	0	0	3.81638	0.694526
ENSMUST00000008090	1.82433	-0.910829	1.72283	-0.528682	0.597026	NA	0	0	3.63424	3.06039	2.86228	1.38905	Phox2a
ENSMUST00000008280	0.605707	2.93586	3.31881	0.884612	0.376366	NA	0	0	3.63424	0	0	0	Fhl2
ENSMUST00000008579	0.741755	-0.24039	2.4996	-0.0961712	0.923385	NA	1.13279	0	0.90856	1.02013	0	1.38905	Rdh13
ENSMUST00000008626	2.08497	0.0357625	1.53878	0.0232407	0.981458	NA	3.39837	1.21901	1.81712	0	1.90819	4.16715	Rnf151
ENSMUST00000008734	0.231509	-1.29121	4.06281	-0.317811	0.750628	NA	0	0	0	0	0	1.38905	Htr3b
ENSMUST00000008830	5.31726	0.412263	0.919335	0.448436	0.653839	NA	7.92953	4.87603	5.45136	3.06039	5.72456	4.86168	Zfp955a
ENSMUST00000008966	0.418608	0.991162	3.57448	0.277289	0.781558	NA	0	0	1.81712	0	0	0.694526	Acyp1
ENSMUST00000008999	4.52571	-0.672592	1.0396	-0.646969	0.517652	NA	2.26558	3.65702	4.5428	7.14091	1.90819	7.63978	Hdac5
ENSMUST00000009003	3.11628	1.60139	1.46999	1.08939	0.275981	NA	4.53116	1.21901	8.17704	0	4.77047	0	Rala
ENSMUST00000009157	5.42954	-0.073359	0.976119	-0.0751538	0.940092	NA	9.06232	2.43802	4.5428	2.04026	4.77047	9.72336	Dynll1
ENSMUST00000009174	0.35882	0.297401	3.79607	0.0783444	0.937554	NA	1.13279	0	0	1.02013	0	0	Pdcl
ENSMUST00000009259	0.658075	-2.70991	2.94377	-0.920555	0.357283	NA	0	0	0	2.04026	1.90819	0	Spatc1l
ENSMUST00000009321	5.16014	-0.519452	1.06533	-0.487597	0.625836	NA	2.26558	9.75206	0.90856	9.18118	1.90819	6.94526	Dgcr8
ENSMUST00000009354	0.709189	3.13546	2.85604	1.09784	0.272276	NA	0	2.43802	1.81712	0	0	0	Prr29
ENSMUST00000009356	0.406336	2.30922	3.90605	0.591191	0.554393	NA	0	2.43802	0	0	0	0
ENSMUST00000009392	0.741574	-2.89666	2.80511	-1.03264	0.301774	NA	0	0	0	3.06039	0	1.38905
ENSMUST00000009522	0.510247	1.13048	3.08705	0.366201	0.714215	NA	1.13279	0	0.90856	1.02013	0	0	Slc16a12
ENSMUST00000009538	1.59241	2.41845	2.03957	1.18576	0.235716	NA	4.53116	0	3.63424	0	0	1.38905	Syn2
ENSMUST00000009550	0.874405	-0.835884	2.49022	-0.335668	0.737122	NA	0	0	1.81712	2.04026	0	1.38905	Elk1
ENSMUST00000009689	5.93435	2.23294	0.977263	2.28489	0.0223192	NA	7.92953	8.53306	12.7198	4.08052	0.954094	1.38905	Kcnq1
ENSMUST00000009695	4.23201	-0.293803	1.03148	-0.284836	0.77577	NA	3.39837	2.43802	5.45136	6.12078	3.81638	4.16715	6330409D20Rik
ENSMUST00000009727	2.37189	-0.806185	1.4159	-0.569382	0.569097	NA	1.13279	1.21901	2.72568	2.04026	5.72456	1.38905	Syngr1
ENSMUST00000009728	0.862134	-0.19993	2.52842	-0.0790731	0.936974	NA	0	2.43802	0	2.04026	0	0.694526
ENSMUST00000009732	0.340044	-1.7522	4.02287	-0.435559	0.663156	NA	0	0	0	2.04026	0	0
ENSMUST00000009740	5.88123	-0.227828	1.08442	-0.210092	0.833596	NA	0	2.43802	13.6284	2.04026	9.54094	7.63978	Taf7l
ENSMUST00000009777	0.347263	-1.8428	4.01591	-0.458875	0.646324	NA	0	0	0	0	0	2.08358	G0s2
ENSMUST00000009791	0.953955	2.29459	2.45674	0.933998	0.350305	NA	2.26558	2.43802	0	1.02013	0	0	Mcu
ENSMUST00000009875	4.17271	0.393323	1.09048	0.360687	0.718334	NA	1.13279	4.87603	8.17704	4.08052	1.90819	4.86168	Kcnd1
ENSMUST00000010007	4.70165	0.0529023	0.984434	0.0537387	0.957143	NA	4.53116	2.43802	7.26848	4.08052	5.72456	4.16715	Sdhb
ENSMUST00000010020	2.37297	0.496123	1.43022	0.346886	0.728677	NA	2.26558	2.43802	3.63424	0	3.81638	2.08358	Cox4i2
ENSMUST00000010049	1.31869	4.01919	2.31447	1.73655	0.0824666	NA	0	6.09504	1.81712	0	0	0	Kdsr
ENSMUST00000010127	5.8165	0.199214	0.924601	0.215459	0.829409	NA	3.39837	6.09504	9.0856	8.16104	1.90819	6.25073	Tktl1
ENSMUST00000010188	1.78591	-0.430864	1.66246	-0.259172	0.795502	NA	3.39837	1.21901	0	3.06039	0.954094	2.08358	Zmynd10
ENSMUST00000010198	4.82199	0.786512	0.966358	0.813894	0.415706	NA	7.92953	4.87603	5.45136	4.08052	3.81638	2.7781	Tusc2
ENSMUST00000010211	1.88726	0.20791	1.51691	0.137062	0.890982	NA	1.13279	1.21901	3.63424	2.04026	1.90819	1.38905	Rassf1
ENSMUST00000010241	0.49147	-0.77878	3.36821	-0.231215	0.817148	NA	0	0	0.90856	2.04026	0	0	Nxf1
ENSMUST00000010248	3.52354	1.6632	1.18108	1.40821	0.159069	NA	7.92953	3.65702	4.5428	1.02013	1.90819	2.08358	Tmem223
ENSMUST00000010249	0.54954	-2.47883	3.13404	-0.790939	0.428979	NA	0	0	0	0	1.90819	1.38905
ENSMUST00000010254	0.477047	-2.25463	3.65591	-0.616709	0.537427	NA	0	0	0	0	2.86228	0	Stx5a
ENSMUST00000010286	0.752708	-1.52114	2.64023	-0.576139	0.564521	NA	0	1.21901	0	0	1.90819	1.38905	Tnfrsf13b
ENSMUST00000010298	1.5285	0.608134	1.89294	0.321264	0.74801	NA	1.13279	3.65702	0.90856	0	0	3.47263	Spire2
ENSMUST00000010451	3.36926	1.03331	1.21742	0.848773	0.396008	NA	3.39837	8.53306	1.81712	2.04026	0.954094	3.47263	Tmem86a
ENSMUST00000010673	1.64373	-0.863497	1.71741	-0.502791	0.615111	NA	1.13279	2.43802	0	2.04026	2.86228	1.38905	Gm266
ENSMUST00000010736	0.310442	0.297402	4.01182	0.0741313	0.940906	NA	0	0	0.90856	0	0.954094	0
ENSMUST00000010985	1.00107	1.59348	2.41551	0.659686	0.509456	NA	3.39837	1.21901	0	0	0	1.38905	Cfap97d1
ENSMUST00000011055	1.17157	-3.57873	2.37689	-1.50563	0.132161	NA	0	0	0	0	2.86228	4.16715	Apip
ENSMUST00000011262	0.231509	-1.29121	4.06281	-0.317811	0.750628	NA	0	0	0	0	0	1.38905	Panx3
ENSMUST00000011400	1.53772	-0.886721	1.69514	-0.523095	0.600908	NA	1.13279	1.21901	0.90856	1.02013	2.86228	2.08358	Adam19
ENSMUST00000011526	3.17488	0.223	1.19694	0.186308	0.852203	NA	2.26558	2.43802	5.45136	2.04026	4.77047	2.08358	Dhdh
ENSMUST00000011733	1.12109	-3.50382	2.22499	-1.57476	0.115313	NA	0	0	0	2.04026	1.90819	2.7781	Fsd1
ENSMUST00000011896	1.92296	-0.166183	1.61252	-0.103058	0.917917	NA	4.53116	0	0.90856	3.06039	0.954094	2.08358	Pgam1
ENSMUST00000012186	1.15502	1.6112	2.14077	0.752628	0.451673	NA	3.39837	0	1.81712	1.02013	0	0.694526	4930579F01Rik
ENSMUST00000012279	2.52251	0.168185	1.42013	0.118429	0.905728	NA	0	2.43802	5.45136	2.04026	3.81638	1.38905	Gsc2
ENSMUST00000012281	1.27137	-0.745413	2.157	-0.345579	0.729659	NA	0	0	2.72568	2.04026	2.86228	0	Bmp5
ENSMUST00000012314	1.20191	-1.16397	2.21198	-0.526212	0.598741	NA	2.26558	0	0	0	2.86228	2.08358	Zfp729a
ENSMUST00000012348	0.717822	3.15271	2.86497	1.10043	0.271144	NA	3.39837	0	0.90856	0	0	0	Gstm2
ENSMUST00000012355	1.32823	-0.508132	1.81577	-0.279844	0.779597	NA	1.13279	1.21901	0.90856	3.06039	0.954094	0.694526	Tex22
ENSMUST00000012426	1.1702	-0.0982676	2.09996	-0.0467949	0.962677	NA	3.39837	0	0	1.02013	1.90819	0.694526	Wnt8a
ENSMUST00000012566	0.455798	-2.19032	3.39665	-0.644847	0.519026	NA	0	0	0	2.04026	0	0.694526
ENSMUST00000012627	0.469458	-0.699888	3.42451	-0.204376	0.838059	NA	0	0	0.90856	0	1.90819	0	Rpa3
ENSMUST00000012679	1.7782	-0.744637	1.79221	-0.415484	0.677787	NA	1.13279	0	2.72568	2.04026	4.77047	0	Tnpo3
ENSMUST00000012847	0.845952	-1.88701	2.75615	-0.684654	0.493562	NA	0	0	0.90856	0	0	4.16715
ENSMUST00000012873	0.302853	1.9429	4.05892	0.478675	0.63217	NA	0	0	1.81712	0	0	0
ENSMUST00000013302	0.310442	0.297402	4.01182	0.0741313	0.940906	NA	0	0	0.90856	0	0.954094	0
ENSMUST00000013458	5.52118	-0.0804647	0.961292	-0.0837048	0.933291	NA	10.1951	2.43802	3.63424	3.06039	4.77047	9.02883	Adh4
ENSMUST00000013497	1.20362	0.232112	1.93141	0.120178	0.904342	NA	1.13279	0	2.72568	1.02013	0.954094	1.38905	4931406B18Rik
ENSMUST00000013773	0.318031	-1.66737	4.02977	-0.413763	0.679048	NA	0	0	0	0	1.90819	0	Cad
ENSMUST00000013845	0.45428	2.52164	3.71856	0.678124	0.497693	NA	0	0	2.72568	0	0	0
ENSMUST00000013851	4.28692	0.592228	1.04454	0.566974	0.570732	NA	3.39837	8.53306	3.63424	4.08052	1.90819	4.16715	Tnfaip8l2
ENSMUST00000013910	0.49147	-0.77878	3.36821	-0.231215	0.817148	NA	0	0	0.90856	2.04026	0	0	Ly6g6e
ENSMUST00000013949	0.794324	0.518292	2.79704	0.1853	0.852994	NA	0	0	2.72568	2.04026	0	0	Birc3
ENSMUST00000014022	2.34108	0.205293	1.37944	0.148823	0.881693	NA	2.26558	2.43802	2.72568	3.06039	2.86228	0.694526	Rnf170
ENSMUST00000014065	0.85751	-0.612784	2.37131	-0.258416	0.796086	NA	1.13279	0	0.90856	1.02013	0	2.08358	Clip3
ENSMUST00000014118	0.488944	-0.5658	3.13175	-0.180666	0.85663	NA	0	1.21901	0	1.02013	0	0.694526	Mcemp1
ENSMUST00000014290	1.27414	1.12551	1.89526	0.593856	0.552608	NA	2.26558	1.21901	1.81712	0	0.954094	1.38905	Apbb1ip
ENSMUST00000014389	5.54843	-0.0522729	0.909457	-0.057477	0.954165	NA	3.39837	8.53306	4.5428	5.10065	4.77047	6.94526	Pigl
ENSMUST00000014421	0.999137	-0.595576	2.39562	-0.248611	0.803662	NA	0	2.43802	0	0	2.86228	0.694526	Ankrd17
ENSMUST00000014445	0.40153	-2.0291	3.56107	-0.569802	0.568812	NA	0	0	0	1.02013	0	1.38905
ENSMUST00000014505	0.943992	3.5406	2.83225	1.2501	0.211262	NA	5.66395	0	0	0	0	0	Mertk
ENSMUST00000014545	0.853835	2.15179	2.39667	0.897827	0.369278	NA	1.13279	1.21901	1.81712	0	0.954094	0
ENSMUST00000014546	0.488053	-2.28049	3.31331	-0.688282	0.491275	NA	0	0	0	1.02013	1.90819	0
ENSMUST00000014578	0.406336	2.30922	3.90605	0.591191	0.554393	NA	0	2.43802	0	0	0	0	Plg
ENSMUST00000014640	0.340044	-1.7522	4.02287	-0.435559	0.663156	NA	0	0	0	2.04026	0	0
ENSMUST00000014673	0.695628	0.257932	2.95784	0.087203	0.93051	NA	2.26558	0	0	0	1.90819	0	Tmbim7
ENSMUST00000014684	0.528842	-0.776605	3.28049	-0.236735	0.812863	NA	1.13279	0	0	2.04026	0	0	U2af1
ENSMUST00000014695	0.724367	0.339422	2.91575	0.11641	0.907328	NA	0	2.43802	0	0	1.90819	0	Mrps25
ENSMUST00000014750	1.68548	0.760871	1.81486	0.419245	0.675037	NA	1.13279	2.43802	2.72568	0	3.81638	0	Slc25a11
ENSMUST00000014753	1.12164	-2.25456	2.18429	-1.03217	0.301992	NA	1.13279	0	0	2.04026	2.86228	0.694526
ENSMUST00000014830	1.67271	0.933075	1.69093	0.551811	0.581078	NA	1.13279	3.65702	1.81712	2.04026	0	1.38905	Ceacam16
ENSMUST00000014922	0.302853	1.9429	4.05892	0.478675	0.63217	NA	0	0	1.81712	0	0	0
ENSMUST00000014927	4.71794	-0.406669	1.02928	-0.395098	0.69277	NA	1.13279	3.65702	7.26848	3.06039	7.63275	5.5562	Plekhg4
ENSMUST00000015017	2.90769	0.90273	1.4268	0.632694	0.526933	NA	10.1951	1.21901	0	2.04026	1.90819	2.08358	Surf2
ENSMUST00000015234	0.347814	0.297401	3.84094	0.0774292	0.938282	NA	1.13279	0	0	0	0.954094	0
ENSMUST00000015277	1.66105	2.27428	1.80882	1.25733	0.208635	NA	3.39837	1.21901	3.63424	1.02013	0	0.694526	Lrrk1
ENSMUST00000015346	3.19045	-0.0961558	1.20968	-0.0794888	0.936644	NA	2.26558	2.43802	4.5428	4.08052	0.954094	4.86168	Cnksr3
ENSMUST00000015391	0.27477	-1.47986	4.0465	-0.365714	0.714579	NA	0	0	0	0	0.954094	0.694526	Nipsnap3b
ENSMUST00000015456	0.76757	-1.62804	2.8466	-0.571923	0.567374	NA	1.13279	0	0	0	0	3.47263	Gadd45b
ENSMUST00000015460	1.25392	-1.55893	2.05833	-0.757375	0.448825	NA	0	0	1.81712	1.02013	1.90819	2.7781	Slamf1
ENSMUST00000015484	1.03504	3.68855	2.31754	1.59158	0.111479	NA	2.26558	1.21901	2.72568	0	0	0	Cybb
ENSMUST00000015498	3.08729	-0.797282	1.29563	-0.615364	0.538315	NA	1.13279	4.87603	0.90856	1.02013	5.72456	4.86168	Pcolce2
ENSMUST00000015581	3.91279	-1.31699	1.16723	-1.1283	0.259194	NA	2.26558	3.65702	0.90856	9.18118	1.90819	5.5562	Gzmb
ENSMUST00000015605	2.12299	-0.598691	1.49231	-0.401183	0.688286	NA	2.26558	0	2.72568	3.06039	1.90819	2.7781	Atf6b
ENSMUST00000015612	1.51366	-0.118731	1.91519	-0.0619945	0.950567	NA	3.39837	0	0.90856	4.08052	0	0.694526	Notch4
ENSMUST00000015620	1.09908	-3.47831	2.42688	-1.43324	0.151788	NA	0	0	0	0	3.81638	2.7781	Prrt1
ENSMUST00000015622	1.06657	-0.132914	2.02941	-0.065494	0.947781	NA	0	1.21901	1.81712	1.02013	0.954094	1.38905	Rnf5
ENSMUST00000015628	1.24948	0.446096	1.91215	0.233295	0.815532	NA	2.26558	1.21901	0.90856	1.02013	0	2.08358	Fam163a
ENSMUST00000015664	1.51703	-0.078582	1.70481	-0.0460943	0.963235	NA	2.26558	1.21901	0.90856	3.06039	0.954094	0.694526	Ctsk
ENSMUST00000015712	0.347814	0.297401	3.84094	0.0774292	0.938282	NA	1.13279	0	0	0	0.954094	0	Lpl
ENSMUST00000015771	0.340044	-1.7522	4.02287	-0.435559	0.663156	NA	0	0	0	2.04026	0	0
ENSMUST00000015829	2.89681	0.716591	1.24945	0.573524	0.56629	NA	4.53116	3.65702	2.72568	2.04026	0.954094	3.47263	Acadsb
ENSMUST00000015877	1.59053	1.3721	1.86453	0.735893	0.461796	NA	2.26558	0	4.5428	2.04026	0	0.694526	Capza2
ENSMUST00000015889	0.463568	-0.524205	3.18956	-0.16435	0.869456	NA	1.13279	0	0	0	0.954094	0.694526	Plekho1
ENSMUST00000015892	0.550982	1.28995	3.00687	0.429001	0.667922	NA	1.13279	1.21901	0	0	0.954094	0	Prpf3
ENSMUST00000015894	1.03937	-0.730328	2.35205	-0.310507	0.756175	NA	0	2.43802	0	1.02013	0	2.7781	Aph1a
ENSMUST00000015903	4.69571	-1.16181	1.03454	-1.12303	0.261427	NA	2.26558	3.65702	2.72568	8.16104	8.58685	2.7781	Cnih1
ENSMUST00000015941	3.92272	-0.695819	1.1347	-0.61322	0.539731	NA	1.13279	6.09504	1.81712	4.08052	7.63275	2.7781	Bhmt2
ENSMUST00000016033	0.764723	1.98481	2.85316	0.695651	0.486647	NA	0	0	3.63424	0	0.954094	0	Lta4h
ENSMUST00000016034	0.936262	-2.00183	2.32903	-0.85951	0.390059	NA	0	0	0.90856	3.06039	0.954094	0.694526	Amdhd1
ENSMUST00000016124	1.39126	0.256184	2.27719	0.1125	0.910427	NA	4.53116	0	0	0	3.81638	0	Lrrc27
ENSMUST00000016125	1.58274	-0.86501	1.85346	-0.4667	0.640714	NA	3.39837	0	0	3.06039	0.954094	2.08358	Stk32c
ENSMUST00000016168	0.310442	0.297402	4.01182	0.0741313	0.940906	NA	0	0	0.90856	0	0.954094	0	Lbp
ENSMUST00000016172	0.756125	-0.203144	2.48342	-0.0818001	0.934806	NA	0	1.21901	0.90856	1.02013	0	1.38905	Celsr1
ENSMUST00000016231	0.968699	0.100669	2.40336	0.0418868	0.966589	NA	1.13279	0	1.81712	0	2.86228	0	Fli1
ENSMUST00000016309	0.321448	0.297401	3.95847	0.0751303	0.940111	NA	0	0	0.90856	1.02013	0	0	Tmbim1
ENSMUST00000016323	3.52249	-1.05879	1.24957	-0.847326	0.396813	NA	4.53116	2.43802	0	3.06039	7.63275	3.47263	Camk1g
ENSMUST00000016383	4.87004	0.225037	0.950086	0.236859	0.812766	NA	4.53116	4.87603	6.35992	4.08052	3.81638	5.5562	Lonrf3
ENSMUST00000016399	0.310442	0.297402	4.01182	0.0741313	0.940906	NA	0	0	0.90856	0	0.954094	0	Tubb1
ENSMUST00000016401	3.26957	-0.737138	1.24366	-0.592716	0.553371	NA	1.13279	2.43802	3.63424	8.16104	2.86228	1.38905	Prelid3b
ENSMUST00000016511	1.45499	-0.73699	1.83946	-0.400656	0.688674	NA	1.13279	1.21901	0.90856	4.08052	0	1.38905	Ptk6
ENSMUST00000016571	2.29831	0.147151	1.55797	0.0944501	0.924752	NA	4.53116	0	2.72568	3.06039	0	3.47263	Ndufa1
ENSMUST00000016640	1.37195	0.381098	1.97477	0.192983	0.846972	NA	0	0	4.5428	2.04026	0.954094	0.694526	Cd274
ENSMUST00000016673	2.01756	1.00128	1.55937	0.642101	0.520807	NA	1.13279	2.43802	4.5428	0	1.90819	2.08358	Il10
ENSMUST00000016678	0.585212	-1.16787	2.90588	-0.401897	0.687759	NA	0	0	0.90856	0	1.90819	0.694526
ENSMUST00000016680	0.713233	-1.36675	2.93997	-0.464886	0.642013	NA	0	1.21901	0	3.06039	0	0	Cul4a
ENSMUST00000016781	5.64493	0.510595	0.926377	0.551174	0.581514	NA	5.66395	9.75206	4.5428	7.14091	1.90819	4.86168	Ift27
ENSMUST00000017090	5.19467	0.149095	1.00203	0.148793	0.881717	NA	7.92953	4.87603	3.63424	1.02013	9.54094	4.16715	Kctd5
ENSMUST00000017142	1.2458	2.78488	2.09862	1.32701	0.184506	NA	2.26558	2.43802	1.81712	0	0.954094	0	Svs4
ENSMUST00000017144	0.310442	0.297402	4.01182	0.0741313	0.940906	NA	0	0	0.90856	0	0.954094	0	Svs6
ENSMUST00000017148	0.850109	-3.07881	2.94998	-1.04367	0.296636	NA	0	0	0	5.10065	0	0	Svs5
ENSMUST00000017151	0.543393	2.74738	2.94898	0.931638	0.351524	NA	1.13279	1.21901	0.90856	0	0	0
ENSMUST00000017153	5.81881	2.5307	1.02729	2.46348	0.0137596	NA	12.4607	7.31405	9.99416	3.06039	0	2.08358	Sdc4
ENSMUST00000017193	0.390524	-1.99539	3.59882	-0.554457	0.579266	NA	0	0	0	0	0.954094	1.38905	Ccdc70
ENSMUST00000017208	0.812672	3.31098	2.98935	1.10759	0.268037	NA	0	4.87603	0	0	0	0
ENSMUST00000017255	0.27477	-1.47986	4.0465	-0.365714	0.714579	NA	0	0	0	0	0.954094	0.694526	Krt24
ENSMUST00000017288	0.798302	3.28467	2.76736	1.18693	0.235255	NA	1.13279	3.65702	0	0	0	0
ENSMUST00000017309	0.302853	1.9429	4.05892	0.478675	0.63217	NA	0	0	1.81712	0	0	0
ENSMUST00000017316	1.57592	-0.462215	1.74144	-0.265421	0.790685	NA	1.13279	0	2.72568	2.04026	2.86228	0.694526	Aoc3
ENSMUST00000017354	0.231509	-1.29121	4.06281	-0.317811	0.750628	NA	0	0	0	0	0	1.38905
ENSMUST00000017430	0.477938	-0.524544	3.15668	-0.16617	0.868023	NA	0	1.21901	0	0	0.954094	0.694526	Glod4
ENSMUST00000017454	0.998246	-2.02651	2.62773	-0.771203	0.440587	NA	0	1.21901	0	0	4.77047	0	Spint4
ENSMUST00000017488	0.304553	0.297402	4.04158	0.0735855	0.94134	NA	1.13279	0	0	0	0	0.694526
ENSMUST00000017544	4.33453	0.466785	1.13492	0.411294	0.680857	NA	6.79674	4.87603	3.63424	3.06039	0	7.63978	Stac2
ENSMUST00000017549	0.550431	-0.901207	3.21038	-0.280717	0.778928	NA	0	1.21901	0	0	0	2.08358	Nek8
ENSMUST00000017572	0.27477	-1.47986	4.0465	-0.365714	0.714579	NA	0	0	0	0	0.954094	0.694526
ENSMUST00000017576	0.302853	1.9429	4.05892	0.478675	0.63217	NA	0	0	1.81712	0	0	0
ENSMUST00000017620	1.08001	2.54242	2.23397	1.13807	0.255089	NA	3.39837	1.21901	0.90856	0	0.954094	0	Cant1
ENSMUST00000017637	3.44684	0.0703512	1.22964	0.0572127	0.954376	NA	6.79674	1.21901	2.72568	2.04026	0.954094	6.94526	Igfbp4
ENSMUST00000017741	1.23228	-2.47105	2.15668	-1.14576	0.251893	NA	0	0	0.90856	1.02013	4.77047	0.694526	Krt12
ENSMUST00000017743	0.231509	-1.29121	4.06281	-0.317811	0.750628	NA	0	0	0	0	0	1.38905	Krt20
ENSMUST00000017751	1.14809	0.842452	1.99031	0.423276	0.672094	NA	1.13279	2.43802	0.90856	1.02013	0	1.38905
ENSMUST00000017836	0.838915	0.448466	2.5172	0.178161	0.858597	NA	1.13279	0	1.81712	0	0	2.08358	Rhbdl3
ENSMUST00000017839	1.2486	1.52109	2.38938	0.636602	0.524384	NA	0	0	5.45136	2.04026	0	0	Rnf135
ENSMUST00000017878	0.499059	-2.30828	3.28667	-0.702315	0.482483	NA	0	0	0	2.04026	0.954094	0	Dbndd2
ENSMUST00000017881	5.37604	-0.813596	0.977548	-0.832282	0.40525	NA	4.53116	2.43802	4.5428	12.2416	5.72456	2.7781	Mmp9
ENSMUST00000018005	5.68526	-0.469726	0.920304	-0.510403	0.609769	NA	2.26558	8.53306	3.63424	5.10065	7.63275	6.94526	Mybl2
ENSMUST00000018012	1.26608	-3.69356	2.33705	-1.58043	0.114008	NA	0	0	0	2.04026	0	5.5562	Sgk2
ENSMUST00000018113	1.11975	2.57678	2.21403	1.16384	0.244487	NA	1.13279	3.65702	0.90856	1.02013	0	0	Ptgis
ENSMUST00000018186	2.28049	0.403907	1.48205	0.272533	0.785212	NA	2.26558	0	5.45136	1.02013	2.86228	2.08358	Cyb5r3
ENSMUST00000018212	1.94758	-0.165493	1.62193	-0.102035	0.918729	NA	3.39837	1.21901	0.90856	0	4.77047	1.38905	Ints2
ENSMUST00000018246	4.98184	-0.346321	1.03757	-0.333781	0.738545	NA	6.79674	3.65702	2.72568	10.2013	0.954094	5.5562	H2bc4
ENSMUST00000018287	2.95436	3.23832	1.51976	2.13081	0.0331051	NA	4.53116	6.09504	5.45136	0	0.954094	0.694526	Mafk
ENSMUST00000018304	0.688039	1.75522	2.75396	0.637344	0.523901	NA	2.26558	0	0.90856	0	0.954094	0
ENSMUST00000018315	2.38316	1.3151	1.41792	0.92749	0.353672	NA	1.13279	3.65702	5.45136	1.02013	0.954094	2.08358	Vmp1
ENSMUST00000018343	0.463568	-0.524205	3.18956	-0.16435	0.869456	NA	1.13279	0	0	0	0.954094	0.694526	Ro60
ENSMUST00000018353	0.340044	-1.7522	4.02287	-0.435559	0.663156	NA	0	0	0	2.04026	0	0	Stk4
ENSMUST00000018383	3.14555	0.605812	1.32953	0.455657	0.648637	NA	0	4.87603	6.35992	4.08052	2.86228	0.694526	Zcchc10
ENSMUST00000018407	4.40347	1.21527	1.06592	1.14011	0.254239	NA	6.79674	3.65702	8.17704	1.02013	1.90819	4.86168	Tbx5
ENSMUST00000018431	0.418608	0.991162	3.57448	0.277289	0.781558	NA	0	0	1.81712	0	0	0.694526	Spag7
ENSMUST00000018466	0.347814	0.297401	3.84094	0.0774292	0.938282	NA	1.13279	0	0	0	0.954094	0
ENSMUST00000018491	1.12272	0.845764	2.00268	0.422316	0.672794	NA	2.26558	1.21901	0.90856	0	0.954094	1.38905	Zkscan6
ENSMUST00000018506	0.231509	-1.29121	4.06281	-0.317811	0.750628	NA	0	0	0	0	0	1.38905	Kpna2
ENSMUST00000018521	2.94541	0.212512	1.22174	0.173942	0.861911	NA	2.26558	3.65702	3.63424	2.04026	1.90819	4.16715	Vezf1
ENSMUST00000018549	1.18794	-0.0291735	2.09014	-0.0139577	0.988864	NA	1.13279	2.43802	0	0	2.86228	0.694526	Mrm1
ENSMUST00000018556	2.36385	-1.03678	1.52048	-0.681881	0.495314	NA	2.26558	2.43802	0	3.06039	5.72456	0.694526	Kansl1
ENSMUST00000018571	3.62538	-0.966957	1.16007	-0.833537	0.404542	NA	2.26558	2.43802	2.72568	4.08052	1.90819	8.33431	Ypel2
ENSMUST00000018572	1.9395	-3.16022	1.91074	-1.65392	0.0981434	NA	1.13279	0	0	8.16104	0.954094	1.38905	Akap1
ENSMUST00000018610	1.23341	1.04133	2.02576	0.514043	0.607222	NA	2.26558	0	2.72568	1.02013	0	1.38905	Nos2
ENSMUST00000018614	2.09064	0.662106	1.51334	0.437513	0.661739	NA	5.66395	1.21901	0.90856	1.02013	0.954094	2.7781	Kcnab3
ENSMUST00000018623	1.01256	-3.37289	2.50683	-1.34548	0.178469	NA	0	0	0	0	1.90819	4.16715	Chct1
ENSMUST00000018630	0.702409	1.78429	2.57591	0.692686	0.488506	NA	1.13279	1.21901	0.90856	0	0.954094	0
ENSMUST00000018644	5.7051	0.291674	0.882466	0.330521	0.741006	NA	4.53116	6.09504	8.17704	5.10065	4.77047	5.5562	Adora2b
ENSMUST00000018653	1.26316	3.99023	2.37002	1.68363	0.0922539	NA	0	1.21901	6.35992	0	0	0	Cenpv
ENSMUST00000018681	2.48978	1.79669	1.51542	1.1856	0.23578	NA	3.39837	0	8.17704	1.02013	0.954094	1.38905	Pcgf2
ENSMUST00000018685	3.20146	0.387395	1.32584	0.292189	0.770142	NA	7.92953	1.21901	1.81712	0	4.77047	3.47263	Cwc25
ENSMUST00000018691	5.30224	0.378996	0.968451	0.391343	0.695544	NA	5.66395	6.09504	6.35992	5.10065	0.954094	7.63978	Pip4k2b
ENSMUST00000018716	0.510247	1.13048	3.08705	0.366201	0.714215	NA	1.13279	0	0.90856	1.02013	0	0	Phf23
ENSMUST00000018739	2.20187	-0.641586	1.47549	-0.434828	0.663687	NA	1.13279	1.21901	2.72568	1.02013	5.72456	1.38905	Glra4
ENSMUST00000018743	4.57805	-0.921519	1.10314	-0.835363	0.403513	NA	6.79674	0	2.72568	5.10065	3.81638	9.02883	Mief2
ENSMUST00000018765	0.390524	-1.99539	3.59882	-0.554457	0.579266	NA	0	0	0	0	0.954094	1.38905	Mmp8
ENSMUST00000018795	1.15145	0.892999	2.11183	0.422855	0.672401	NA	0	3.65702	0.90856	0	0.954094	1.38905	Tada2a
ENSMUST00000018800	0.434677	-0.340788	3.52745	-0.0966103	0.923036	NA	0	1.21901	0	0	0	1.38905	Myl4
ENSMUST00000018810	2.02179	0.511421	1.46734	0.348537	0.727437	NA	2.26558	1.21901	3.63424	1.02013	1.90819	2.08358	Cbx1
ENSMUST00000018842	2.77896	0.64918	1.37157	0.47331	0.635992	NA	5.66395	0	4.5428	2.04026	0.954094	3.47263	Lhx1
ENSMUST00000018871	2.63225	-0.324574	1.44254	-0.225001	0.821978	NA	1.13279	1.21901	4.5428	6.12078	0	2.7781	Cpsf4l
ENSMUST00000018877	0.536061	-0.900148	3.241	-0.277738	0.781214	NA	1.13279	0	0	0	0	2.08358
ENSMUST00000018887	1.09908	-3.47831	2.42688	-1.43324	0.151788	NA	0	0	0	0	3.81638	2.7781
ENSMUST00000018918	0.406336	2.30922	3.90605	0.591191	0.554393	NA	0	2.43802	0	0	0	0
ENSMUST00000018992	3.32852	0.692062	1.25409	0.551843	0.581056	NA	3.39837	3.65702	5.45136	0	1.90819	5.5562	Rars
ENSMUST00000018993	4.77432	0.595834	0.96435	0.617861	0.536667	NA	5.66395	6.09504	5.45136	5.10065	2.86228	3.47263	Wwc1
ENSMUST00000019026	3.99544	1.45923	1.13654	1.28393	0.199168	NA	5.66395	8.53306	3.63424	1.02013	0.954094	4.16715	Mrpl45
ENSMUST00000019068	2.79839	-1.39786	1.40028	-0.998273	0.318147	NA	2.26558	2.43802	0	7.14091	2.86228	2.08358	Alox15
ENSMUST00000019074	0.659147	1.7845	2.62534	0.679723	0.49668	NA	1.13279	1.21901	0.90856	0	0	0.694526
ENSMUST00000019220	0.40153	-2.0291	3.56107	-0.569802	0.568812	NA	0	0	0	1.02013	0	1.38905
ENSMUST00000019266	1.13607	-1.17207	2.18757	-0.535786	0.592106	NA	1.13279	0	0.90856	4.08052	0	0.694526	Ccl9
ENSMUST00000019268	1.51703	-0.078582	1.70481	-0.0460943	0.963235	NA	2.26558	1.21901	0.90856	3.06039	0.954094	0.694526	Scrn1
ENSMUST00000019290	5.90434	-1.22393	0.900618	-1.35899	0.174151	NA	4.53116	2.43802	3.63424	8.16104	7.63275	9.02883	Cacng2
ENSMUST00000019333	1.90813	1.11721	1.56339	0.714608	0.474851	NA	1.13279	4.87603	1.81712	1.02013	1.90819	0.694526	Rnf145
ENSMUST00000019386	3.46054	-0.429569	1.14585	-0.374891	0.707742	NA	2.26558	4.87603	1.81712	4.08052	2.86228	4.86168	Ripk4
ENSMUST00000019422	3.64759	0.914072	1.13979	0.801965	0.422573	NA	6.79674	4.87603	2.72568	3.06039	0.954094	3.47263	Dpep1
ENSMUST00000019426	0.347814	0.297401	3.84094	0.0774292	0.938282	NA	1.13279	0	0	0	0.954094	0
ENSMUST00000019445	1.93762	-0.601299	1.6545	-0.363433	0.716282	NA	1.13279	3.65702	0	1.02013	0.954094	4.86168	Hsd17b1
ENSMUST00000019447	4.77312	0.0408112	1.07334	0.0380227	0.96967	NA	10.1951	2.43802	1.81712	6.12078	6.67866	1.38905	Psmc3ip
ENSMUST00000019456	0.730749	-0.213172	2.51093	-0.0848976	0.932343	NA	1.13279	0	0.90856	0	0.954094	1.38905
ENSMUST00000019517	0.532205	-0.732075	3.04251	-0.240615	0.809853	NA	0	1.21901	0	1.02013	0.954094	0	Cops3
ENSMUST00000019572	0.267181	0.297402	4.08047	0.0728841	0.941898	NA	0	0	0.90856	0	0	0.694526	Zfp874b
ENSMUST00000019576	2.20495	-0.55372	1.54551	-0.358278	0.720136	NA	4.53116	0	0.90856	1.02013	1.90819	4.86168	Ddx39a
ENSMUST00000019577	5.19117	0.517641	1.05305	0.491562	0.623029	NA	5.66395	3.65702	9.0856	5.10065	0	7.63978	Gipc1
ENSMUST00000019660	0.669081	-2.73103	2.94759	-0.926531	0.35417	NA	0	0	0	3.06039	0.954094	0	Zkscan1
ENSMUST00000019701	2.62282	-1.20024	1.51624	-0.791587	0.428602	NA	0	0	4.5428	4.08052	5.72456	1.38905	Dusp9
ENSMUST00000019708	0.810831	-1.7218	2.5883	-0.665226	0.505906	NA	1.13279	0	0	0	0.954094	2.7781	Arid3a
ENSMUST00000019721	1.05165	-1.25181	2.35488	-0.531579	0.595017	NA	0	0	1.81712	1.02013	0	3.47263	Pdk4
ENSMUST00000019829	0.52209	1.33764	3.29509	0.405951	0.684779	NA	0	2.43802	0	0	0	0.694526
ENSMUST00000019833	5.3466	1.01657	1.04642	0.971474	0.331312	NA	15.8591	1.21901	4.5428	2.04026	2.86228	5.5562	Fmc1
ENSMUST00000019862	5.58615	-0.723793	0.93655	-0.772828	0.439624	NA	6.79674	1.21901	4.5428	6.12078	8.58685	6.25073	L3hypdh
ENSMUST00000019906	3.65058	-0.884984	1.23335	-0.717547	0.473037	NA	3.39837	2.43802	1.81712	3.06039	10.495	0.694526	Vip
ENSMUST00000019907	0.958402	-0.752292	2.16544	-0.347409	0.728284	NA	0	1.21901	0.90856	1.02013	1.90819	0.694526	Fbxo5
ENSMUST00000019908	0.35882	0.297401	3.79607	0.0783444	0.937554	NA	1.13279	0	0	1.02013	0	0
ENSMUST00000019911	0.850237	-1.72035	2.56798	-0.66992	0.502909	NA	0	1.21901	0	1.02013	2.86228	0	Hdac2
ENSMUST00000019917	0.455798	-2.19032	3.39665	-0.644847	0.519026	NA	0	0	0	2.04026	0	0.694526	Rwdd1
ENSMUST00000019937	1.25048	2.87428	2.23926	1.28359	0.199287	NA	2.26558	0	4.5428	0	0	0.694526	Sec63
ENSMUST00000019938	0.304553	0.297402	4.04158	0.0735855	0.94134	NA	1.13279	0	0	0	0	0.694526
ENSMUST00000019954	0.406336	2.30922	3.90605	0.591191	0.554393	NA	0	2.43802	0	0	0	0
ENSMUST00000019975	1.69526	-0.352207	1.91808	-0.183625	0.854308	NA	4.53116	0	0	0	2.86228	2.7781	Wasf1
ENSMUST00000020016	4.65103	0.0873661	1.04257	0.0837985	0.933217	NA	1.13279	9.75206	3.63424	3.06039	4.77047	5.5562	Gje1
ENSMUST00000020023	1.49298	-0.0268034	2.04358	-0.0131159	0.989535	NA	4.53116	0	0	0	0.954094	3.47263	Reep3
ENSMUST00000020024	0.406336	2.30922	3.90605	0.591191	0.554393	NA	0	2.43802	0	0	0	0
ENSMUST00000020057	0.231509	-1.29121	4.06281	-0.317811	0.750628	NA	0	0	0	0	0	1.38905	Lin7a
ENSMUST00000020064	2.02294	-0.406462	1.5114	-0.26893	0.787983	NA	2.26558	1.21901	1.81712	1.02013	0.954094	4.86168	Fam162b
ENSMUST00000020078	1.72553	-0.51473	1.65832	-0.310391	0.756263	NA	0	2.43802	1.81712	3.06039	0.954094	2.08358	Lims1
ENSMUST00000020081	5.53169	-0.0492438	0.908061	-0.0542296	0.956752	NA	7.92953	4.87603	3.63424	4.08052	5.72456	6.94526	Zwint
ENSMUST00000020094	0.925256	-1.98516	2.31647	-0.856974	0.391459	NA	0	0	0.90856	2.04026	1.90819	0.694526	Epyc
ENSMUST00000020099	0.798302	3.28467	2.76736	1.18693	0.235255	NA	1.13279	3.65702	0	0	0	0	Cdk1
ENSMUST00000020107	2.10457	1.27285	1.55655	0.817738	0.413507	NA	3.39837	3.65702	1.81712	3.06039	0	0.694526	Atp2b1
ENSMUST00000020109	3.54913	-1.20571	1.17659	-1.02475	0.305483	NA	3.39837	1.21901	1.81712	3.06039	7.63275	4.16715	Actr6
ENSMUST00000020112	5.34552	-0.734544	0.939741	-0.781645	0.434423	NA	3.39837	6.09504	2.72568	5.10065	5.72456	9.02883	Uhrf1bp1l
ENSMUST00000020149	0.658256	0.145073	2.81383	0.0515573	0.958881	NA	1.13279	0	0.90856	0	1.90819	0	Ikbip
ENSMUST00000020161	3.08982	-0.874959	1.23993	-0.705655	0.480403	NA	1.13279	3.65702	1.81712	2.04026	5.72456	4.16715	Arg1
ENSMUST00000020165	0.898245	-0.454974	2.33151	-0.195141	0.845282	NA	1.13279	1.21901	0	0	0.954094	2.08358	Pde7b
ENSMUST00000020171	0.609504	2.89514	3.32533	0.870633	0.383955	NA	0	3.65702	0	0	0	0	Ccn2
ENSMUST00000020182	1.10641	-1.07424	2.19844	-0.488636	0.625099	NA	0	1.21901	0.90856	0	3.81638	0.694526	Pex7
ENSMUST00000020185	0.420307	-0.339649	3.57139	-0.0951027	0.924233	NA	1.13279	0	0	0	0	1.38905	Il20ra
ENSMUST00000020204	2.47369	1.50606	1.47596	1.02039	0.307542	NA	5.66395	2.43802	2.72568	3.06039	0.954094	0	Ntn4
ENSMUST00000020212	0.571552	-2.52697	3.09078	-0.817583	0.413595	NA	0	0	0	2.04026	0	1.38905
ENSMUST00000020220	4.7725	0.653544	1.13618	0.57521	0.56515	NA	10.1951	0	7.26848	1.02013	6.67866	3.47263	Nuak1
ENSMUST00000020222	5.32857	0.682952	0.946325	0.721688	0.470486	NA	3.39837	7.31405	9.0856	3.06039	2.86228	6.25073	4930463O16Rik
ENSMUST00000020226	1.76796	-0.723938	1.71429	-0.422296	0.672809	NA	1.13279	0	2.72568	5.10065	0.954094	0.694526	Rfx4
ENSMUST00000020252	0.680087	-2.75617	3.19574	-0.862451	0.388439	NA	0	0	0	4.08052	0	0	Sycp3
ENSMUST00000020255	2.35166	0.167417	1.45253	0.115258	0.90824	NA	1.13279	3.65702	2.72568	0	3.81638	2.7781	Slc5a8
ENSMUST00000020262	1.81285	1.64147	1.7992	0.912334	0.361593	NA	3.39837	4.87603	0	0	1.90819	0.694526	Pbld2
ENSMUST00000020268	1.41519	-1.48329	1.98233	-0.748256	0.454306	NA	2.26558	0	0	1.02013	3.81638	1.38905	Ccar1
ENSMUST00000020273	4.62672	0.0095043	1.03916	0.00914609	0.992703	NA	9.06232	1.21901	3.63424	6.12078	2.86228	4.86168	Supv3l1
ENSMUST00000020287	2.34368	-2.50026	1.62311	-1.54041	0.12346	NA	1.13279	0	0.90856	6.12078	3.81638	2.08358	Npffr1
ENSMUST00000020289	1.71387	0.46858	1.6589	0.282464	0.777588	NA	2.26558	0	3.63424	2.04026	0.954094	1.38905	Pald1
ENSMUST00000020298	1.16795	-0.438037	1.95841	-0.22367	0.823014	NA	1.13279	0	1.81712	1.02013	0.954094	2.08358	Pcbd1
ENSMUST00000020308	4.05372	0.757572	1.09846	0.689667	0.490404	NA	2.26558	4.87603	8.17704	1.02013	3.81638	4.16715	Ddit4
ENSMUST00000020321	0.45428	2.52164	3.71856	0.678124	0.497693	NA	0	0	2.72568	0	0	0
ENSMUST00000020322	2.91062	1.3785	1.41247	0.975951	0.329089	NA	7.92953	3.65702	0.90856	3.06039	1.90819	0	Srgap1
ENSMUST00000020323	1.26908	1.8053	2.07426	0.870332	0.384119	NA	2.26558	0	3.63424	1.02013	0	0.694526	Avpr1a
ENSMUST00000020329	2.26802	2.93866	1.71006	1.71845	0.0857143	NA	3.39837	6.09504	2.72568	0	0	1.38905	Egfr
ENSMUST00000020339	1.97933	-0.352547	1.55775	-0.226318	0.820954	NA	3.39837	0	1.81712	1.02013	2.86228	2.7781	Tbc1d15
ENSMUST00000020340	0.304553	0.297402	4.04158	0.0735855	0.94134	NA	1.13279	0	0	0	0	0.694526	Pcsk4
ENSMUST00000020341	3.15434	0.481183	1.24029	0.387961	0.698045	NA	6.79674	2.43802	1.81712	1.02013	4.77047	2.08358	2310011J03Rik
ENSMUST00000020350	0.870988	-1.89792	2.35239	-0.806804	0.41978	NA	0	0	0.90856	1.02013	1.90819	1.38905
ENSMUST00000020362	3.05329	0.686446	1.25247	0.548074	0.583641	NA	4.53116	1.21901	5.45136	4.08052	0.954094	2.08358	Kcnmb1
ENSMUST00000020366	3.09467	0.478578	1.43077	0.334489	0.738011	NA	2.26558	8.53306	0	6.12078	0.954094	0.694526	Gabrp
ENSMUST00000020375	4.17641	0.831441	1.08877	0.763653	0.445074	NA	4.53116	2.43802	9.0856	1.02013	3.81638	4.16715	Rab3ip
ENSMUST00000020378	2.85347	-1.22979	1.4253	-0.862832	0.38823	NA	0	2.43802	2.72568	1.02013	1.90819	9.02883	Best3
ENSMUST00000020382	0.231509	-1.29121	4.06281	-0.317811	0.750628	NA	0	0	0	0	0	1.38905
ENSMUST00000020392	3.3623	-1.74588	1.30839	-1.33438	0.182081	NA	1.13279	3.65702	0	7.14091	4.77047	3.47263	9530003J23Rik
ENSMUST00000020410	5.31559	0.441546	1.01369	0.435581	0.66314	NA	10.1951	7.31405	0.90856	7.14091	2.86228	3.47263	Spata48
ENSMUST00000020434	0.839103	-3.05789	2.72489	-1.12221	0.261774	NA	0	0	0	4.08052	0.954094	0	Glipr1l2
ENSMUST00000020440	3.52082	1.15325	1.24753	0.92443	0.355263	NA	6.79674	1.21901	6.35992	5.10065	0.954094	0.694526	Timm13
ENSMUST00000020456	3.97982	-0.111018	1.06848	-0.103903	0.917246	NA	4.53116	2.43802	4.5428	2.04026	4.77047	5.5562	Tektip1
ENSMUST00000020463	0.543212	-0.775783	3.24926	-0.238757	0.811294	NA	0	1.21901	0	2.04026	0	0
ENSMUST00000020485	4.60065	0.459793	1.20041	0.38303	0.701697	NA	1.13279	3.65702	10.9027	7.14091	4.77047	0	Glt8d2
ENSMUST00000020493	1.01597	-2.19302	2.41413	-0.908412	0.363661	NA	0	0	0.90856	1.02013	0	4.16715	Pofut2
ENSMUST00000020500	3.62301	-0.822789	1.20659	-0.681911	0.495295	NA	3.39837	3.65702	0.90856	1.02013	8.58685	4.16715	Appl2
ENSMUST00000020501	0.510247	1.13048	3.08705	0.366201	0.714215	NA	1.13279	0	0.90856	1.02013	0	0	Sumo3
ENSMUST00000020513	1.44228	-0.190506	1.82097	-0.104618	0.916679	NA	0	1.21901	2.72568	3.06039	0.954094	0.694526	Papolg
ENSMUST00000020527	0.27477	-1.47986	4.0465	-0.365714	0.714579	NA	0	0	0	0	0.954094	0.694526	1700093K21Rik
ENSMUST00000020554	1.99965	-0.00739404	1.55082	-0.00476782	0.996196	NA	2.26558	0	3.63424	3.06039	0.954094	2.08358	Madcam1
ENSMUST00000020564	3.4475	3.33363	1.54464	2.15819	0.0309127	NA	2.26558	14.6281	1.81712	1.02013	0.954094	0	Shc2
ENSMUST00000020566	3.22	-0.662252	1.19134	-0.555887	0.578288	NA	1.13279	3.65702	2.72568	4.08052	2.86228	4.86168	Theg
ENSMUST00000020578	2.84339	-1.13198	1.29018	-0.877387	0.380277	NA	1.13279	2.43802	1.81712	2.04026	4.77047	4.86168	Nudcd2
ENSMUST00000020579	5.70477	-0.672528	0.919304	-0.731563	0.464436	NA	5.66395	4.87603	2.72568	10.2013	3.81638	6.94526	Hmmr
ENSMUST00000020629	2.71279	0.653577	1.29611	0.504262	0.614077	NA	5.66395	2.43802	1.81712	3.06039	1.90819	1.38905	Gfpt2
ENSMUST00000020640	3.80444	-0.687322	1.11944	-0.613987	0.539224	NA	3.39837	3.65702	1.81712	5.10065	1.90819	6.94526	Rack1
ENSMUST00000020689	0.894389	-0.284454	2.50006	-0.113779	0.909413	NA	0	2.43802	0	1.02013	1.90819	0
ENSMUST00000020699	4.67422	1.30265	1.08404	1.20166	0.229495	NA	2.26558	12.1901	5.45136	5.10065	0.954094	2.08358	Castor1
ENSMUST00000020702	1.29736	0.696083	2.03951	0.341299	0.732878	NA	1.13279	3.65702	0	2.04026	0.954094	0
ENSMUST00000020706	5.57261	0.990707	0.972152	1.01909	0.308162	NA	6.79674	6.09504	9.0856	8.16104	1.90819	1.38905	Adcy1
ENSMUST00000020717	0.27477	-1.47986	4.0465	-0.365714	0.714579	NA	0	0	0	0	0.954094	0.694526	Arf5
ENSMUST00000020734	0.506021	2.65898	3.26163	0.815231	0.41494	NA	0	1.21901	1.81712	0	0	0	Eif4enif1
ENSMUST00000020741	1.94492	-0.640143	1.58956	-0.402718	0.687155	NA	3.39837	1.21901	0	3.06039	1.90819	2.08358	Drg1
ENSMUST00000020753	3.52611	0.48033	1.13094	0.424719	0.671042	NA	3.39837	2.43802	6.35992	3.06039	3.81638	2.08358	Clhc1
ENSMUST00000020756	4.3124	-1.09647	1.14525	-0.957412	0.338359	NA	4.53116	0	3.63424	8.16104	1.90819	7.63978	Pnpt1
ENSMUST00000020759	1.53948	-0.808899	1.99657	-0.405144	0.685372	NA	3.39837	0	0	3.06039	0	2.7781	Efemp1
ENSMUST00000020820	2.44839	-0.68269	1.54719	-0.441246	0.659035	NA	5.66395	0	0	4.08052	2.86228	2.08358	Mrpl22
ENSMUST00000020826	3.10669	0.990336	1.22093	0.811133	0.417289	NA	2.26558	3.65702	6.35992	3.06039	1.90819	1.38905	Sap30l
ENSMUST00000020831	4.16796	0.645229	1.0592	0.609168	0.542413	NA	7.92953	3.65702	3.63424	5.10065	1.90819	2.7781	Fam114a2
ENSMUST00000020837	0.825201	-1.72225	2.57381	-0.669145	0.503403	NA	0	1.21901	0	0	0.954094	2.7781	Myo19
ENSMUST00000020846	0.85581	0.214397	2.50073	0.0857339	0.931678	NA	0	0	2.72568	1.02013	0	1.38905	Srebf1
ENSMUST00000020851	4.88589	0.203459	1.00088	0.203281	0.838916	NA	7.92953	2.43802	5.45136	2.04026	3.81638	7.63978	Cox11
ENSMUST00000020877	2.35268	-1.1478	1.5294	-0.750485	0.452962	NA	1.13279	2.43802	0.90856	4.08052	0	5.5562	Polr1f
ENSMUST00000020896	1.86222	0.178097	1.64941	0.107976	0.914014	NA	1.13279	1.21901	3.63424	1.02013	0	4.16715	Tspan13
ENSMUST00000020899	0.318922	0.297401	3.97047	0.0749034	0.940292	NA	0	1.21901	0	0	0	0.694526	Matn3
ENSMUST00000020904	1.33797	-0.742438	1.85204	-0.400876	0.688512	NA	1.13279	0	1.81712	2.04026	0.954094	2.08358	Rock2
ENSMUST00000020962	0.347263	-1.8428	4.01591	-0.458875	0.646324	NA	0	0	0	0	0	2.08358
ENSMUST00000020963	0.426197	-0.52329	3.28364	-0.159363	0.873383	NA	0	0	0.90856	0	0.954094	0.694526
ENSMUST00000020964	0.658075	-2.70991	2.94377	-0.920555	0.357283	NA	0	0	0	2.04026	1.90819	0	Fkbp1b
ENSMUST00000020965	1.04613	-2.15033	2.36059	-0.910929	0.362333	NA	1.13279	0	0	3.06039	0	2.08358	Allc
ENSMUST00000020969	3.35485	1.56872	1.24693	1.25807	0.208366	NA	1.13279	8.53306	5.45136	1.02013	1.90819	2.08358	Cmpk2
ENSMUST00000020980	1.87866	-0.630827	1.54797	-0.407519	0.683627	NA	1.13279	2.43802	0.90856	3.06039	0.954094	2.7781	Rrm2
ENSMUST00000020982	2.30282	-0.324631	1.52559	-0.212791	0.83149	NA	1.13279	1.21901	3.63424	3.06039	4.77047	0	Klf11
ENSMUST00000021005	1.11633	1.33708	2.31918	0.57653	0.564257	NA	1.13279	3.65702	0	0	1.90819	0	Tpo
ENSMUST00000021028	3.52064	-0.426408	1.40955	-0.302514	0.762261	NA	7.92953	1.21901	0	0	5.72456	6.25073	Itgb3
ENSMUST00000021029	4.38779	-0.146415	1.01842	-0.143767	0.885684	NA	4.53116	2.43802	5.45136	3.06039	6.67866	4.16715	Efcab3
ENSMUST00000021044	3.61415	-0.538045	1.21293	-0.443593	0.657337	NA	5.66395	2.43802	0.90856	4.08052	0.954094	7.63978	5530401A14Rik
ENSMUST00000021050	0.536061	-0.900148	3.241	-0.277738	0.781214	NA	1.13279	0	0	0	0	2.08358	Adap2
ENSMUST00000021052	5.91556	-0.475854	0.885029	-0.53767	0.590805	NA	3.39837	6.09504	5.45136	5.10065	5.72456	9.72336	Smarcd2
ENSMUST00000021056	5.59631	0.225151	0.924744	0.243473	0.807639	NA	10.1951	2.43802	5.45136	6.12078	3.81638	5.5562	Scn4a
ENSMUST00000021062	4.43116	0.996266	1.10221	0.903881	0.366059	NA	1.13279	8.53306	8.17704	1.02013	2.86228	4.86168	Ddx5
ENSMUST00000021085	2.39411	1.00213	1.6322	0.613973	0.539233	NA	0	1.21901	8.17704	3.06039	1.90819	0	Nup85
ENSMUST00000021087	4.14549	-0.253191	1.06219	-0.238366	0.811597	NA	3.39837	2.43802	5.45136	6.12078	1.90819	5.5562	Mif4gd
ENSMUST00000021091	0.724367	0.339422	2.91575	0.11641	0.907328	NA	0	2.43802	0	0	1.90819	0	Pafah1b1
ENSMUST00000021164	0.406336	2.30922	3.90605	0.591191	0.554393	NA	0	2.43802	0	0	0	0	Pimreg
ENSMUST00000021170	0.720453	-1.44715	2.69573	-0.536828	0.591386	NA	0	1.21901	0	1.02013	0	2.08358	Mxra7
ENSMUST00000021190	0.302853	1.9429	4.05892	0.478675	0.63217	NA	0	0	1.81712	0	0	0
ENSMUST00000021197	0.841013	1.26172	2.76168	0.456866	0.647767	NA	0	3.65702	0	0	0	1.38905	Blmh
ENSMUST00000021203	3.14805	-0.223773	1.20251	-0.186088	0.852376	NA	2.26558	3.65702	2.72568	4.08052	4.77047	1.38905	Timm22
ENSMUST00000021207	2.75182	0.992879	1.29552	0.766396	0.443441	NA	4.53116	3.65702	2.72568	2.04026	2.86228	0.694526	Rflnb
ENSMUST00000021234	0.302853	1.9429	4.05892	0.478675	0.63217	NA	0	0	1.81712	0	0	0	Cacna1g
ENSMUST00000021241	0.340225	2.08636	3.83303	0.54431	0.586228	NA	1.13279	0	0.90856	0	0	0
ENSMUST00000021246	0.347263	-1.8428	4.01591	-0.458875	0.646324	NA	0	0	0	0	0	2.08358	Snx11
ENSMUST00000021271	1.52565	3.12878	2.10694	1.48499	0.137547	NA	0	3.65702	4.5428	0	0.954094	0	Per1
ENSMUST00000021273	4.20645	-0.773898	1.06058	-0.729693	0.465578	NA	3.39837	1.21901	4.5428	7.14091	4.77047	4.16715	Vamp2
ENSMUST00000021283	0.977888	-0.549287	2.38981	-0.229845	0.818212	NA	0	2.43802	0	2.04026	0	1.38905
ENSMUST00000021285	0.961819	0.19301	2.24988	0.0857869	0.931636	NA	0	1.21901	1.81712	2.04026	0	0.694526	Stx8
ENSMUST00000021286	5.02504	0.568222	1.0318	0.550711	0.581832	NA	5.66395	4.87603	7.26848	3.06039	8.58685	0.694526	Stx8
ENSMUST00000021287	5.84139	0.230606	1.01133	0.228022	0.819629	NA	7.92953	4.87603	6.35992	0	4.77047	11.1124	Cfap52
ENSMUST00000021290	1.27732	-0.390945	1.8918	-0.206653	0.836281	NA	0	2.43802	0.90856	1.02013	1.90819	1.38905	Rcvrn
ENSMUST00000021296	1.34405	0.552625	1.95198	0.28311	0.777093	NA	1.13279	0	3.63424	0	1.90819	1.38905	Tmem101
ENSMUST00000021302	0.820138	-0.72297	2.55934	-0.282483	0.777573	NA	0	0	1.81712	1.02013	0	2.08358
ENSMUST00000021338	2.61879	1.75935	1.47962	1.18906	0.234417	NA	5.66395	0	6.35992	2.04026	0.954094	0.694526	Ap4s1
ENSMUST00000021343	0.971934	-1.02574	2.43641	-0.421007	0.67375	NA	0	0	1.81712	3.06039	0.954094	0	Tshr
ENSMUST00000021375	1.01779	-0.694624	2.25402	-0.308171	0.757952	NA	1.13279	1.21901	0	3.06039	0	0.694526	Sec23a
ENSMUST00000021378	1.71615	2.34904	1.77592	1.32272	0.18593	NA	2.26558	3.65702	2.72568	0	0.954094	0.694526	4930512B01Rik
ENSMUST00000021379	0.576358	1.33508	3.18065	0.419751	0.674667	NA	0	2.43802	0	1.02013	0	0	Gemin2
ENSMUST00000021381	5.92104	-0.594538	0.882873	-0.673413	0.500684	NA	4.53116	6.09504	3.63424	8.16104	4.77047	8.33431	Pnn
ENSMUST00000021390	3.62552	0.75675	1.14085	0.663322	0.507125	NA	5.66395	2.43802	5.45136	2.04026	4.77047	1.38905	Galc
ENSMUST00000021405	5.57359	0.0578487	0.903362	0.0640372	0.948941	NA	5.66395	6.09504	5.45136	4.08052	3.81638	8.33431	Polr2h
ENSMUST00000021412	0.231509	-1.29121	4.06281	-0.317811	0.750628	NA	0	0	0	0	0	1.38905
ENSMUST00000021413	1.55624	2.01959	1.89752	1.06433	0.287178	NA	2.26558	2.43802	2.72568	0	1.90819	0	Nfkbia
ENSMUST00000021416	1.99626	0.60523	1.64802	0.367248	0.713434	NA	0	3.65702	3.63424	0	1.90819	2.7781	Mbip
ENSMUST00000021424	1.41648	0.399359	1.97172	0.202544	0.839492	NA	0	4.87603	0	1.02013	1.90819	0.694526	Sptlc2
ENSMUST00000021438	3.33444	1.05746	1.32792	0.796325	0.425843	NA	11.3279	1.21901	0.90856	2.04026	3.81638	0.694526	Nova1
ENSMUST00000021447	2.60111	0.159156	1.31626	0.120915	0.903758	NA	3.39837	1.21901	3.63424	1.02013	2.86228	3.47263	Ppp2r5e
ENSMUST00000021450	2.35146	2.10342	1.52787	1.3767	0.168605	NA	2.26558	3.65702	5.45136	2.04026	0	0.694526	Sgpp1
ENSMUST00000021453	1.37535	-0.676214	1.83625	-0.368258	0.712681	NA	2.26558	0	0.90856	2.04026	0.954094	2.08358	Tex21
ENSMUST00000021459	0.418608	0.991162	3.57448	0.277289	0.781558	NA	0	0	1.81712	0	0	0.694526	Rab15
ENSMUST00000021471	3.95342	0.900516	1.23281	0.730458	0.46511	NA	5.66395	6.09504	3.63424	0	7.63275	0.694526	Tmx1
ENSMUST00000021479	4.25323	-1.24138	1.27797	-0.971369	0.331364	NA	0	0	7.26848	11.2214	2.86228	4.16715	Actr10
ENSMUST00000021486	1.8753	-0.655481	1.63792	-0.400191	0.689016	NA	2.26558	1.21901	0.90856	4.08052	0	2.7781	Timm9
ENSMUST00000021490	0.801913	-0.60725	2.60176	-0.2334	0.815451	NA	0	0	1.81712	2.04026	0.954094	0	Serpina1f
ENSMUST00000021495	3.95846	0.868172	1.21043	0.717239	0.473226	NA	7.92953	3.65702	3.63424	7.14091	0	1.38905	Serpina5
ENSMUST00000021506	0.933736	-1.91487	2.30622	-0.830306	0.406366	NA	0	1.21901	0	2.04026	0.954094	1.38905	Serpina3n
ENSMUST00000021513	5.28666	0.770636	0.947315	0.813495	0.415934	NA	5.66395	9.75206	4.5428	6.12078	2.86228	2.7781	Gsc
ENSMUST00000021514	1.38765	0.438636	2.08327	0.210552	0.833237	NA	0	1.21901	3.63424	0	0	3.47263	Ppm1a
ENSMUST00000021522	0.52209	1.33764	3.29509	0.405951	0.684779	NA	0	2.43802	0	0	0	0.694526
ENSMUST00000021523	0.54954	-2.47883	3.13404	-0.790939	0.428979	NA	0	0	0	0	1.90819	1.38905	Mnat1
ENSMUST00000021532	1.51466	-1.93291	2.11828	-0.912488	0.361512	NA	0	0	1.81712	1.02013	0	6.25073	Snapc1
ENSMUST00000021544	1.9703	-0.632988	1.59369	-0.397184	0.691231	NA	2.26558	2.43802	0	4.08052	0.954094	2.08358	Plek2
ENSMUST00000021547	1.67037	-1.16708	1.69474	-0.688647	0.491046	NA	0	1.21901	1.81712	2.04026	2.86228	2.08358	Zfyve26
ENSMUST00000021552	4.60048	0.226198	1.00017	0.226159	0.821078	NA	7.92953	2.43802	4.5428	3.06039	4.77047	4.86168	Zfp36l1
ENSMUST00000021554	0.463017	-2.25479	3.68553	-0.611795	0.540673	NA	0	0	0	0	0	2.7781
ENSMUST00000021603	0.37319	0.297401	3.74059	0.0795064	0.93663	NA	0	1.21901	0	1.02013	0	0	Fbln5
ENSMUST00000021605	5.72098	0.641648	0.944488	0.67936	0.49691	NA	5.66395	7.31405	8.17704	1.02013	3.81638	8.33431	Trip11
ENSMUST00000021617	0.507721	1.29158	3.09034	0.41794	0.675991	NA	1.13279	1.21901	0	0	0	0.694526	Asb2
ENSMUST00000021631	5.69057	0.318231	0.916775	0.34712	0.728501	NA	2.26558	8.53306	8.17704	5.10065	3.81638	6.25073	Ppp4r4
ENSMUST00000021632	1.25962	1.28305	2.15639	0.595001	0.551843	NA	0	3.65702	1.81712	0	0	2.08358	Akr1c12
ENSMUST00000021634	2.93291	0.973655	1.45034	0.67133	0.502011	NA	5.66395	6.09504	0	3.06039	0	2.7781	Akr1c13
ENSMUST00000021639	0.285776	-1.52701	4.04209	-0.377777	0.705596	NA	0	0	0	1.02013	0	0.694526	Tubal3
ENSMUST00000021641	1.13795	-0.0313668	2.24116	-0.0139958	0.988833	NA	3.39837	0	0	2.04026	0	1.38905	Tshz3
ENSMUST00000021649	0.362184	0.297401	3.78278	0.0786196	0.937335	NA	0	1.21901	0	0	0.954094	0	Acot2
ENSMUST00000021652	2.02965	0.174269	1.69885	0.10258	0.918296	NA	0	3.65702	2.72568	5.10065	0	0.694526	Acot4
ENSMUST00000021667	1.06339	1.73812	2.32925	0.746215	0.455537	NA	2.26558	0	2.72568	0	0	1.38905	Isca2
ENSMUST00000021668	1.77123	0.827396	1.68677	0.49052	0.623766	NA	3.39837	2.43802	0.90856	1.02013	2.86228	0	Npc2
ENSMUST00000021669	0.406336	2.30922	3.90605	0.591191	0.554393	NA	0	2.43802	0	0	0	0
ENSMUST00000021676	2.45197	-1.31825	1.40219	-0.94014	0.347146	NA	1.13279	1.21901	1.81712	2.04026	5.72456	2.7781	Erg28
ENSMUST00000021684	5.00813	1.515	1.01956	1.48594	0.137295	NA	3.39837	9.75206	9.0856	4.08052	0.954094	2.7781	Cyp46a1
ENSMUST00000021691	2.17594	-1.20753	1.64582	-0.733692	0.463136	NA	1.13279	0	2.72568	0	5.72456	3.47263	Degs2
ENSMUST00000021693	5.63941	-0.65212	0.959963	-0.679318	0.496937	NA	3.39837	7.31405	2.72568	4.08052	3.81638	12.5015	Slc25a29
ENSMUST00000021701	4.3338	-0.95902	1.18676	-0.808102	0.419032	NA	7.92953	0	0.90856	9.18118	3.81638	4.16715	Mok
ENSMUST00000021729	5.32177	0.0651301	0.945694	0.0688701	0.945093	NA	6.79674	6.09504	3.63424	2.04026	5.72456	7.63978	Gpr132
ENSMUST00000021734	0.391966	2.26108	3.62965	0.622948	0.533318	NA	1.13279	1.21901	0	0	0	0
ENSMUST00000021757	1.241	0.289456	1.89623	0.152648	0.878676	NA	2.26558	0	1.81712	1.02013	0.954094	1.38905	Aoah
ENSMUST00000021779	0.347263	-1.8428	4.01591	-0.458875	0.646324	NA	0	0	0	0	0	2.08358
ENSMUST00000021790	2.80042	0.420748	1.25793	0.334476	0.73802	NA	2.26558	3.65702	3.63424	2.04026	3.81638	1.38905	Tmem14c
ENSMUST00000021796	1.12941	-1.00926	2.30431	-0.437988	0.661395	NA	2.26558	0	0	0	3.81638	0.694526	Edn1
ENSMUST00000021800	0.304553	0.297402	4.04158	0.0735855	0.94134	NA	1.13279	0	0	0	0	0.694526	Mcur1
ENSMUST00000021802	0.434677	-0.340788	3.52745	-0.0966103	0.923036	NA	0	1.21901	0	0	0	1.38905	Cap2
ENSMUST00000021806	0.377597	2.21781	4.02186	0.55144	0.581332	NA	2.26558	0	0	0	0	0
ENSMUST00000021813	0.434677	-0.340788	3.52745	-0.0966103	0.923036	NA	0	1.21901	0	0	0	1.38905	Barx1
ENSMUST00000021817	0.499059	-2.30828	3.28667	-0.702315	0.482483	NA	0	0	0	2.04026	0.954094	0	Ippk
ENSMUST00000021820	0.839103	-3.05789	2.72489	-1.12221	0.261774	NA	0	0	0	4.08052	0.954094	0	Aspn
ENSMUST00000021828	0.45428	2.52164	3.71856	0.678124	0.497693	NA	0	0	2.72568	0	0	0	Nxnl2
ENSMUST00000021832	0.470349	1.17392	3.17213	0.370074	0.711327	NA	0	1.21901	0.90856	0	0	0.694526	Wrnip1
ENSMUST00000021837	0.340044	-1.7522	4.02287	-0.435559	0.663156	NA	0	0	0	2.04026	0	0	Serpinb9c
ENSMUST00000021844	0.340044	-1.7522	4.02287	-0.435559	0.663156	NA	0	0	0	2.04026	0	0	Ripk1
ENSMUST00000021857	1.88137	0.296782	1.50875	0.196708	0.844056	NA	2.26558	1.21901	2.72568	2.04026	0.954094	2.08358	Fars2
ENSMUST00000021866	0.875794	0.830494	2.51611	0.330071	0.741346	NA	0	2.43802	0.90856	0	1.90819	0	Riok1
ENSMUST00000021870	3.34211	-1.45412	1.24422	-1.1687	0.242523	NA	2.26558	1.21901	1.81712	4.08052	8.58685	2.08358	Slc35b3
ENSMUST00000021903	0.687306	-2.79951	2.87728	-0.97297	0.330568	NA	0	0	0	2.04026	0	2.08358	Gadd45g
ENSMUST00000021922	1.8288	-0.032296	1.57565	-0.020497	0.983647	NA	3.39837	1.21901	0.90856	1.02013	0.954094	3.47263	Msx2
ENSMUST00000021930	2.1039	-0.0632378	1.54502	-0.0409302	0.967352	NA	0	2.43802	3.63424	2.04026	3.81638	0.694526	Sfxn1
ENSMUST00000021939	0.362184	0.297401	3.78278	0.0786196	0.937335	NA	0	1.21901	0	0	0.954094	0	Cdk20
ENSMUST00000021941	2.71436	0.971109	1.36021	0.713942	0.475263	NA	1.13279	2.43802	7.26848	1.02013	0.954094	3.47263	Mxd3
ENSMUST00000021957	0.463568	-0.524205	3.18956	-0.16435	0.869456	NA	1.13279	0	0	0	0.954094	0.694526	Fam193b
ENSMUST00000021959	1.33923	-0.526032	1.91812	-0.274243	0.783898	NA	1.13279	1.21901	0.90856	4.08052	0	0.694526	Txndc15
ENSMUST00000021963	1.61059	-1.6862	1.7976	-0.938028	0.34823	NA	1.13279	1.21901	0	3.06039	2.86228	1.38905	Caml
ENSMUST00000021971	1.42116	0.618508	1.80403	0.342848	0.731712	NA	0	2.43802	2.72568	1.02013	0.954094	1.38905	Slc25a48
ENSMUST00000021991	0.941506	-0.54819	2.2816	-0.240266	0.810124	NA	1.13279	1.21901	0	0	1.90819	1.38905	Mterf3
ENSMUST00000021997	1.17726	0.140433	2.19837	0.0638806	0.949065	NA	0	0	3.63424	2.04026	0	1.38905	Rsl1
ENSMUST00000022007	0.949149	-0.620575	2.41487	-0.25698	0.797194	NA	2.26558	0	0	2.04026	0	1.38905	Cfap90
ENSMUST00000022009	4.21589	-0.325391	1.05331	-0.308923	0.75738	NA	2.26558	2.43802	6.35992	4.08052	6.67866	3.47263	Cetn3
ENSMUST00000022028	2.76453	0.6866	1.30835	0.524782	0.599735	NA	5.66395	3.65702	0.90856	3.06039	1.90819	1.38905	1700067P10Rik
ENSMUST00000022030	2.65745	-0.473475	1.34379	-0.352342	0.724582	NA	4.53116	1.21901	0.90856	4.08052	3.81638	1.38905	Ccnh
ENSMUST00000022032	5.51662	1.09162	1.04604	1.04357	0.296686	NA	15.8591	4.87603	1.81712	6.12078	0.954094	3.47263	2210016F16Rik
ENSMUST00000022040	2.65731	0.89345	1.49212	0.598781	0.549319	NA	6.79674	0	3.63424	2.04026	0	3.47263	Agtpbp1
ENSMUST00000022051	0.906661	-0.892256	2.32496	-0.383772	0.701147	NA	0	0	1.81712	1.02013	1.90819	0.694526	Nkd2
ENSMUST00000022053	3.33719	-0.0607988	1.15819	-0.0524946	0.958135	NA	2.26558	4.87603	2.72568	4.08052	1.90819	4.16715	Trip13
ENSMUST00000022075	3.66319	1.87164	1.26305	1.48184	0.138384	NA	10.1951	3.65702	3.63424	1.02013	0	3.47263	Pcsk1
ENSMUST00000022078	2.60829	1.06982	1.42121	0.752752	0.451599	NA	0	6.09504	4.5428	1.02013	1.90819	2.08358	Rhobtb3
ENSMUST00000022087	1.22783	-0.154278	2.07289	-0.0744267	0.940671	NA	2.26558	1.21901	0	1.02013	2.86228	0	Nsun2
ENSMUST00000022100	3.82703	-2.6396	1.30706	-2.01949	0.0434363	NA	2.26558	0	0.90856	4.08052	6.67866	9.02883	Slc6a3
ENSMUST00000022115	2.42208	1.08929	1.58877	0.685618	0.492954	NA	0	7.31405	2.72568	1.02013	0	3.47263	Xrcc4
ENSMUST00000022120	1.80472	-2.02768	1.72786	-1.17352	0.240588	NA	0	1.21901	0.90856	3.06039	2.86228	2.7781	Acot12
ENSMUST00000022148	0.916401	-0.334276	2.66992	-0.125201	0.900365	NA	0	2.43802	0	3.06039	0	0	Mccc2
ENSMUST00000022172	0.954487	-2.0701	2.43154	-0.851351	0.394574	NA	0	0	0.90856	2.04026	0	2.7781	Polk
ENSMUST00000022186	2.04879	3.62379	1.80332	2.00951	0.0444832	NA	3.39837	3.65702	4.5428	0	0	0.694526	S100z
ENSMUST00000022197	3.20988	-0.301713	1.20949	-0.249455	0.803009	NA	1.13279	4.87603	2.72568	3.06039	1.90819	5.5562	Scamp1
ENSMUST00000022207	0.999191	0.270676	2.11147	0.128193	0.897996	NA	1.13279	1.21901	0.90856	2.04026	0	0.694526	Elovl7
ENSMUST00000022212	4.69428	0.115207	1.02502	0.112395	0.91051	NA	1.13279	6.09504	7.26848	6.12078	4.77047	2.7781	Plk2
ENSMUST00000022228	5.5203	0.30075	0.911048	0.330114	0.741314	NA	7.92953	4.87603	5.45136	7.14091	2.86228	4.86168	Cwc27
ENSMUST00000022230	0.434677	-0.340788	3.52745	-0.0966103	0.923036	NA	0	1.21901	0	0	0	1.38905
ENSMUST00000022232	4.90433	0.210581	1.00142	0.210283	0.833447	NA	2.26558	6.09504	7.26848	4.08052	7.63275	2.08358	Nt5el
ENSMUST00000022246	0.480464	-0.734714	3.14893	-0.233321	0.815512	NA	0	0	0.90856	1.02013	0.954094	0	Fgf10
ENSMUST00000022257	5.89769	0.674973	0.934028	0.722648	0.469896	NA	11.3279	4.87603	5.45136	3.06039	8.58685	2.08358	Atxn7
ENSMUST00000022264	0.470349	1.17392	3.17213	0.370074	0.711327	NA	0	1.21901	0.90856	0	0	0.694526
ENSMUST00000022268	4.79363	0.0341902	0.970078	0.0352447	0.971885	NA	4.53116	3.65702	6.35992	5.10065	2.86228	6.25073	Pdhb
ENSMUST00000022272	0.433786	-2.12941	3.45939	-0.615545	0.538195	NA	0	0	0	0	1.90819	0.694526
ENSMUST00000022282	1.24139	1.53091	2.09186	0.731841	0.464265	NA	0	3.65702	1.81712	1.02013	0.954094	0	Gpx8
ENSMUST00000022286	0.860873	-0.555193	2.36612	-0.234643	0.814486	NA	0	1.21901	0.90856	0	0.954094	2.08358
ENSMUST00000022293	2.29129	-1.63886	1.59166	-1.02966	0.303171	NA	3.39837	0	0	3.06039	3.81638	3.47263	Vdac2
ENSMUST00000022296	1.06548	2.5774	2.24439	1.14837	0.250814	NA	1.13279	3.65702	0.90856	0	0	0.694526	Ube2e1
ENSMUST00000022310	0.696519	1.8651	2.74556	0.679314	0.496939	NA	2.26558	1.21901	0	0	0	0.694526	Ngly1
ENSMUST00000022325	0.231509	-1.29121	4.06281	-0.317811	0.750628	NA	0	0	0	0	0	1.38905
ENSMUST00000022337	2.54496	-0.252924	1.33775	-0.189067	0.850041	NA	1.13279	1.21901	4.5428	2.04026	2.86228	3.47263	Cdhr1
ENSMUST00000022345	2.47969	-0.203772	1.45486	-0.140063	0.88861	NA	1.13279	1.21901	4.5428	0	3.81638	4.16715	Dnajc9
ENSMUST00000022349	0.231509	-1.29121	4.06281	-0.317811	0.750628	NA	0	0	0	0	0	1.38905
ENSMUST00000022353	5.3668	0.856377	1.0603	0.807676	0.419277	NA	12.4607	0	8.17704	3.06039	5.72456	2.7781	Mss51
ENSMUST00000022356	4.62353	0.62648	1.17156	0.53474	0.59283	NA	11.3279	3.65702	1.81712	8.16104	0	2.7781	Usp54
ENSMUST00000022368	0.964527	2.36758	2.45286	0.965229	0.33443	NA	1.13279	0	3.63424	1.02013	0	0	Plau
ENSMUST00000022378	2.05413	2.16362	1.71023	1.2651	0.205835	NA	1.13279	3.65702	5.45136	0	0	2.08358	Ero1a
ENSMUST00000022380	5.48708	-0.477709	1.03004	-0.463777	0.642808	NA	9.06232	4.87603	0	5.10065	7.63275	6.25073	Psmc6
ENSMUST00000022398	2.02291	-1.33181	1.80087	-0.739538	0.459581	NA	2.26558	1.21901	0	1.02013	7.63275	0	ccdc198
ENSMUST00000022427	3.48391	-0.661175	1.23462	-0.535528	0.592285	NA	4.53116	3.65702	0	6.12078	3.81638	2.7781	4933413J09Rik
ENSMUST00000022429	2.3774	2.87537	1.66113	1.73097	0.0834579	NA	2.26558	8.53306	1.81712	0	0.954094	0.694526	Arf4
ENSMUST00000022460	1.26103	1.51575	2.08186	0.728076	0.466567	NA	3.39837	1.21901	0.90856	2.04026	0	0	Galnt15
ENSMUST00000022494	0.682149	1.83852	2.98116	0.616713	0.537424	NA	3.39837	0	0	0	0	0.694526	Ebpl
ENSMUST00000022499	0.354595	2.13548	3.77157	0.566205	0.571255	NA	0	1.21901	0.90856	0	0	0
ENSMUST00000022507	3.69657	0.0414524	1.12354	0.0368945	0.970569	NA	4.53116	1.21901	5.45136	2.04026	4.77047	4.16715	Pspc1
ENSMUST00000022517	0.825752	-0.187862	2.41457	-0.0778035	0.937984	NA	1.13279	1.21901	0	0	1.90819	0.694526	Cryl1
ENSMUST00000022522	4.04863	0.575338	1.06027	0.542634	0.587382	NA	4.53116	7.31405	2.72568	4.08052	2.86228	2.7781	Tdh
ENSMUST00000022528	5.94021	0.116152	0.891514	0.130286	0.89634	NA	9.06232	4.87603	4.5428	5.10065	8.58685	3.47263	Pinx1
ENSMUST00000022535	2.25764	0.622141	1.51167	0.411558	0.680663	NA	3.39837	4.87603	0	1.02013	2.86228	1.38905	Dcp1a
ENSMUST00000022536	3.90057	0.489253	1.10354	0.443347	0.657515	NA	3.39837	8.53306	1.81712	3.06039	3.81638	2.7781	Ska3
ENSMUST00000022538	2.10732	0.358993	1.54619	0.232179	0.816399	NA	0	2.43802	4.5428	3.06039	1.90819	0.694526	Mrpl57
ENSMUST00000022543	0.853284	0.477525	2.50331	0.190758	0.848715	NA	0	1.21901	1.81712	0	0	2.08358	Micu2
ENSMUST00000022544	4.41019	-0.587611	1.07456	-0.546839	0.584489	NA	4.53116	2.43802	3.63424	1.02013	8.58685	6.25073	Hmbox1
ENSMUST00000022548	0.304553	0.297402	4.04158	0.0735855	0.94134	NA	1.13279	0	0	0	0	0.694526	1700129C05Rik
ENSMUST00000022551	0.231509	-1.29121	4.06281	-0.317811	0.750628	NA	0	0	0	0	0	1.38905
ENSMUST00000022561	3.23517	-1.30977	1.23545	-1.06016	0.289072	NA	1.13279	3.65702	0.90856	4.08052	4.77047	4.86168	Amer2
ENSMUST00000022567	0.837215	1.3254	2.74962	0.48203	0.629785	NA	0	0	3.63424	0	0	1.38905	Cacna2d3
ENSMUST00000022579	0.420307	-0.339649	3.57139	-0.0951027	0.924233	NA	1.13279	0	0	0	0	1.38905
ENSMUST00000022592	0.918815	-3.22582	2.59195	-1.24455	0.213296	NA	0	0	0	2.04026	0	3.47263	Tnfsf11
ENSMUST00000022597	0.749344	-1.54437	2.49072	-0.620048	0.535226	NA	1.13279	0	0	1.02013	0.954094	1.38905	Naa16
ENSMUST00000022613	2.4012	-4.60128	1.75008	-2.62918	0.00855912	NA	0	0	0	4.08052	4.77047	5.5562	Esco2
ENSMUST00000022614	2.97135	0.554177	1.46731	0.377681	0.705668	NA	2.26558	8.53306	0	0	2.86228	4.16715	Ccdc25
ENSMUST00000022620	0.736417	1.83786	2.90345	0.632992	0.526739	NA	3.39837	0	0	1.02013	0	0	Chrna2
ENSMUST00000022634	0.340044	-1.7522	4.02287	-0.435559	0.663156	NA	0	0	0	2.04026	0	0
ENSMUST00000022639	0.347263	-1.8428	4.01591	-0.458875	0.646324	NA	0	0	0	0	0	2.08358	Nefl
ENSMUST00000022640	0.463017	-2.25479	3.68553	-0.611795	0.540673	NA	0	0	0	0	0	2.7781	Adam7
ENSMUST00000022660	1.90194	-0.92375	1.71823	-0.537616	0.590842	NA	1.13279	0	2.72568	4.08052	0	3.47263	Loxl2
ENSMUST00000022663	0.510247	1.13048	3.08705	0.366201	0.714215	NA	1.13279	0	0.90856	1.02013	0	0	Tnfrsf10b
ENSMUST00000022666	4.56805	-1.31889	1.10155	-1.1973	0.231191	NA	4.53116	2.43802	0.90856	12.2416	3.81638	3.47263	Klhl1
ENSMUST00000022694	2.23467	0.00468282	1.49861	0.00312477	0.997507	NA	4.53116	1.21901	0.90856	5.10065	0.954094	0.694526
ENSMUST00000022709	0.824861	-1.70354	2.79438	-0.60963	0.542107	NA	1.13279	0	0	0	3.81638	0	Spry2
ENSMUST00000022711	1.75291	0.980405	1.61894	0.605583	0.544792	NA	1.13279	1.21901	4.5428	1.02013	1.90819	0.694526	4930449E01Rik
ENSMUST00000022715	0.824053	0.72023	2.56451	0.280845	0.77883	NA	0	1.21901	1.81712	0	1.90819	0	Rbm26
ENSMUST00000022722	0.491652	2.62476	3.29613	0.796315	0.425849	NA	1.13279	0	1.81712	0	0	0
ENSMUST00000022725	2.61608	0.964966	1.34123	0.719465	0.471855	NA	4.53116	1.21901	4.5428	3.06039	0.954094	1.38905	Dct
ENSMUST00000022744	1.48958	0.927343	1.87393	0.494866	0.620695	NA	2.26558	0	3.63424	0	0.954094	2.08358	Gdnf
ENSMUST00000022746	4.55358	-2.05896	1.14692	-1.7952	0.0726211	NA	3.39837	0	1.81712	5.10065	11.4491	5.5562	Osmr
ENSMUST00000022749	0.644596	-1.22367	2.81531	-0.434647	0.663819	NA	1.13279	0	0	2.04026	0	0.694526	C9
ENSMUST00000022782	4.47309	1.49106	1.03592	1.43936	0.150048	NA	7.92953	7.31405	4.5428	3.06039	1.90819	2.08358	Lrp10
ENSMUST00000022786	0.760931	3.2235	2.8106	1.14691	0.25142	NA	0	3.65702	0.90856	0	0	0	4931414P19Rik
ENSMUST00000022787	1.65095	-0.902215	1.82804	-0.493543	0.621629	NA	1.13279	2.43802	0	0	2.86228	3.47263	Slc7a8
ENSMUST00000022803	0.455798	-2.19032	3.39665	-0.644847	0.519026	NA	0	0	0	2.04026	0	0.694526
ENSMUST00000022806	0.578771	-2.57596	3.37635	-0.762942	0.445498	NA	0	0	0	0	0	3.47263	Bcl2l2
ENSMUST00000022815	1.32693	2.10469	2.21242	0.951306	0.341449	NA	5.66395	0	0.90856	0	0	1.38905	Ngdn
ENSMUST00000022819	1.92192	-0.673598	1.51733	-0.443935	0.657089	NA	1.13279	2.43802	0.90856	3.06039	1.90819	2.08358	Jph4
ENSMUST00000022820	0.310442	0.297402	4.01182	0.0741313	0.940906	NA	0	0	0.90856	0	0.954094	0	Dhrs2
ENSMUST00000022842	3.19071	-1.05831	1.23229	-0.858818	0.390441	NA	2.26558	1.21901	2.72568	4.08052	1.90819	6.94526	Cct5
ENSMUST00000022853	0.565352	1.33559	3.20239	0.417061	0.676634	NA	0	2.43802	0	0	0.954094	0	C1qtnf3
ENSMUST00000022856	0.318031	-1.66737	4.02977	-0.413763	0.679048	NA	0	0	0	0	1.90819	0
ENSMUST00000022857	1.04613	-2.15033	2.36059	-0.910929	0.362333	NA	1.13279	0	0	3.06039	0	2.08358	Ttc23l
ENSMUST00000022867	0.586103	0.517209	2.93361	0.176305	0.860054	NA	0	1.21901	0.90856	0	0	1.38905	Laptm4b
ENSMUST00000022875	4.1833	2.07776	1.30228	1.59547	0.110607	NA	11.3279	0	9.0856	0	1.90819	2.7781	Ank
ENSMUST00000022894	4.41361	1.7979	1.12027	1.60488	0.108521	NA	4.53116	9.75206	6.35992	3.06039	0	2.7781	Ywhaz
ENSMUST00000022901	0.541951	-1.0425	2.98013	-0.349817	0.726476	NA	0	0	0.90856	0	0.954094	1.38905	Rrm2b
ENSMUST00000022906	0.382935	-0.336617	3.69733	-0.0910433	0.927458	NA	0	0	0.90856	0	0	1.38905
ENSMUST00000022908	0.302853	1.9429	4.05892	0.478675	0.63217	NA	0	0	1.81712	0	0	0	Slc25a32
ENSMUST00000022909	1.42754	0.323977	1.92182	0.168578	0.866129	NA	1.13279	0	3.63424	1.02013	0	2.7781	Dcaf13
ENSMUST00000022915	1.17865	1.48646	2.23857	0.664023	0.506676	NA	0	2.43802	2.72568	0	1.90819	0	Dpys
ENSMUST00000022945	0.52209	1.33764	3.29509	0.405951	0.684779	NA	0	2.43802	0	0	0	0.694526
ENSMUST00000022962	3.7062	-0.406933	1.13154	-0.359627	0.719126	NA	4.53116	2.43802	2.72568	2.04026	2.86228	7.63978	Emc2
ENSMUST00000022976	4.21205	-2.02251	1.17714	-1.71815	0.0857691	NA	1.13279	0	3.63424	7.14091	5.72456	7.63978	Washc5
ENSMUST00000022985	0.426197	-0.52329	3.28364	-0.159363	0.873383	NA	0	0	0.90856	0	0.954094	0.694526	Klhl38
ENSMUST00000022986	1.999	0.702406	1.58875	0.442113	0.658408	NA	4.53116	1.21901	1.81712	0	0.954094	3.47263	Fbxo32
ENSMUST00000023036	1.56433	1.00926	1.85128	0.545169	0.585637	NA	4.53116	0	1.81712	0	0.954094	2.08358	Rbx1
ENSMUST00000023040	0.693378	-0.327364	2.72322	-0.120212	0.904315	NA	0	0	1.81712	0	0.954094	1.38905	Slc25a17
ENSMUST00000023044	5.82872	-1.5764	0.953614	-1.65308	0.0983152	NA	2.26558	4.87603	1.81712	5.10065	10.495	10.4179	Fam83f
ENSMUST00000023050	4.55485	0.0361312	0.992324	0.0364107	0.970955	NA	3.39837	4.87603	5.45136	5.10065	5.72456	2.7781	Tab1
ENSMUST00000023062	2.24059	0.924137	1.458	0.633838	0.526187	NA	1.13279	4.87603	2.72568	3.06039	0.954094	0.694526	Tomm22
ENSMUST00000023067	0.267181	0.297402	4.08047	0.0728841	0.941898	NA	0	0	0.90856	0	0	0.694526	Ribc2
ENSMUST00000023070	0.493351	1.2522	3.36281	0.372367	0.70962	NA	2.26558	0	0	0	0	0.694526	Upk3a
ENSMUST00000023072	2.83021	0.782941	1.24624	0.628242	0.529845	NA	3.39837	3.65702	3.63424	2.04026	2.86228	1.38905	Parvb
ENSMUST00000023086	0.267181	0.297402	4.08047	0.0728841	0.941898	NA	0	0	0.90856	0	0	0.694526	Smdt1
ENSMUST00000023087	3.09406	0.223086	1.30186	0.171359	0.863941	NA	7.92953	1.21901	0.90856	4.08052	0.954094	3.47263	Twf1
ENSMUST00000023099	3.39298	1.92521	1.39836	1.37676	0.168588	NA	7.92953	0	8.17704	0	2.86228	1.38905	Slc38a2
ENSMUST00000023100	2.89575	0.471919	1.31547	0.358746	0.719785	NA	1.13279	2.43802	6.35992	5.10065	0.954094	1.38905	Srebf2
ENSMUST00000023104	3.33182	0.822189	1.20103	0.68457	0.493615	NA	1.13279	6.09504	5.45136	3.06039	2.86228	1.38905	Rpap3
ENSMUST00000023110	1.5478	0.645413	1.91422	0.337168	0.73599	NA	5.66395	0	0	1.02013	1.90819	0.694526	Desi1
ENSMUST00000023113	3.37698	-0.614248	1.27023	-0.483573	0.628689	NA	1.13279	6.09504	0.90856	1.02013	7.63275	3.47263	Polr3h
ENSMUST00000023117	1.0353	0.0225138	2.17422	0.0103549	0.991738	NA	2.26558	0	0.90856	0	0.954094	2.08358	Phf5a
ENSMUST00000023119	1.44517	3.05669	2.14908	1.42233	0.154932	NA	2.26558	0	5.45136	0	0.954094	0	Vdr
ENSMUST00000023133	1.86657	0.752554	1.64704	0.456912	0.647734	NA	2.26558	4.87603	0	1.02013	0.954094	2.08358	Ppp1r1a
ENSMUST00000023143	1.72986	4.42871	1.94567	2.27619	0.0228349	NA	3.39837	2.43802	4.5428	0	0	0	Litaf
ENSMUST00000023144	4.96163	-1.11793	0.990213	-1.12898	0.258907	NA	2.26558	2.43802	4.5428	6.12078	9.54094	4.86168	Prm1
ENSMUST00000023147	1.05805	3.71559	2.47643	1.50038	0.133515	NA	4.53116	0	1.81712	0	0	0	Ciita
ENSMUST00000023154	0.318031	-1.66737	4.02977	-0.413763	0.679048	NA	0	0	0	0	1.90819	0	Cldn1
ENSMUST00000023156	2.59081	-0.147923	1.29581	-0.114154	0.909115	NA	2.26558	2.43802	2.72568	2.04026	1.90819	4.16715	Il1rap
ENSMUST00000023206	1.17344	-1.07597	2.28032	-0.471851	0.637033	NA	2.26558	0	0	4.08052	0	0.694526	Ercc4
ENSMUST00000023259	2.47947	-1.73837	1.5246	-1.14021	0.254199	NA	2.26558	1.21901	0	7.14091	2.86228	1.38905	Lynx1
ENSMUST00000023260	0.760532	1.08757	2.64763	0.410773	0.681239	NA	2.26558	0	0.90856	0	0	1.38905	Lypd2
ENSMUST00000023261	0.51361	1.17398	3.07947	0.381228	0.703034	NA	0	1.21901	0.90856	0	0.954094	0
ENSMUST00000023262	3.87879	1.28493	1.10933	1.15829	0.246744	NA	5.66395	7.31405	3.63424	1.02013	2.86228	2.7781
ENSMUST00000023269	3.09005	0.343382	1.27213	0.269927	0.787216	NA	3.39837	6.09504	0.90856	5.10065	0.954094	2.08358	Rpl24
ENSMUST00000023271	3.18354	0.908509	1.25552	0.723611	0.469305	NA	3.39837	3.65702	5.45136	0	3.81638	2.7781	Mroh4
ENSMUST00000023294	0.267181	0.297402	4.08047	0.0728841	0.941898	NA	0	0	0.90856	0	0	0.694526	Rabl2
ENSMUST00000023312	0.304553	0.297402	4.04158	0.0735855	0.94134	NA	1.13279	0	0	0	0	0.694526	Alcam
ENSMUST00000023330	1.65569	0.147294	1.95854	0.0752059	0.940051	NA	0	2.43802	2.72568	0	4.77047	0	Morc1
ENSMUST00000023339	0.285776	-1.52701	4.04209	-0.377777	0.705596	NA	0	0	0	1.02013	0	0.694526	Gcsam
ENSMUST00000023343	5.44244	0.719977	0.962331	0.748159	0.454364	NA	6.79674	2.43802	10.9027	3.06039	6.67866	2.7781	Atg3
ENSMUST00000023344	2.41592	-0.836932	1.41246	-0.592535	0.553492	NA	1.13279	1.21901	2.72568	6.12078	1.90819	1.38905	Slc35a5
ENSMUST00000023356	1.23774	-2.44234	2.24696	-1.08696	0.277056	NA	0	1.21901	0	2.04026	0	4.16715	Snai2
ENSMUST00000023361	3.08075	-0.17814	1.23118	-0.14469	0.884956	NA	4.53116	2.43802	1.81712	1.02013	3.81638	4.86168	Pdxdc1
ENSMUST00000023365	2.75744	0.215884	1.36006	0.158731	0.873881	NA	0	2.43802	6.35992	3.06039	1.90819	2.7781	Bfar
ENSMUST00000023391	3.09514	0.586796	1.22998	0.477077	0.633307	NA	1.13279	3.65702	6.35992	2.04026	1.90819	3.47263	Mrpl40
ENSMUST00000023400	2.91411	1.09678	1.54136	0.711566	0.476733	NA	1.13279	10.9711	0	0	1.90819	3.47263	Tmem114
ENSMUST00000023426	2.08048	-2.21472	1.75542	-1.26165	0.207075	NA	2.26558	0	0	1.02013	5.72456	3.47263	Cldnd1
ENSMUST00000023431	1.63205	-2.8872	2.06462	-1.39842	0.161988	NA	0	1.21901	0	5.10065	0	3.47263	Tbc1d23
ENSMUST00000023432	0.267181	0.297402	4.08047	0.0728841	0.941898	NA	0	0	0.90856	0	0	0.694526	Nit2
ENSMUST00000023437	0.302853	1.9429	4.05892	0.478675	0.63217	NA	0	0	1.81712	0	0	0	Adgrg7
ENSMUST00000023441	0.406336	2.30922	3.90605	0.591191	0.554393	NA	0	2.43802	0	0	0	0
ENSMUST00000023444	0.521199	-0.698216	3.29749	-0.211742	0.832309	NA	0	1.21901	0	0	1.90819	0	Lztr1
ENSMUST00000023450	1.76096	1.73101	1.86447	0.928421	0.353189	NA	0	7.31405	0.90856	0	0.954094	1.38905	Serpind1
ENSMUST00000023455	1.2537	-0.30922	2.15416	-0.143545	0.885859	NA	3.39837	0	0	2.04026	0	2.08358	Ppil2
ENSMUST00000023460	4.58685	0.500676	1.00436	0.498505	0.618128	NA	5.66395	6.09504	4.5428	3.06039	1.90819	6.25073	Ncbp2
ENSMUST00000023469	1.13943	-1.11894	2.0549	-0.544521	0.586083	NA	0	1.21901	0.90856	3.06039	0.954094	0.694526	Btnl7-ps
ENSMUST00000023504	3.32316	0.460954	1.25805	0.366404	0.714063	NA	7.92953	0	3.63424	2.04026	2.86228	3.47263	Nr1i2
ENSMUST00000023510	0.524616	1.17399	3.05781	0.383933	0.701028	NA	0	1.21901	0.90856	1.02013	0	0
ENSMUST00000023530	0.872431	0.779389	2.25416	0.345756	0.729526	NA	1.13279	1.21901	0.90856	1.02013	0.954094	0	Ropn1
ENSMUST00000023531	0.74638	0.265141	2.88515	0.0918983	0.926779	NA	0	2.43802	0	2.04026	0	0	Hcls1
ENSMUST00000023550	0.406336	2.30922	3.90605	0.591191	0.554393	NA	0	2.43802	0	0	0	0	Pdia5
ENSMUST00000023554	0.267181	0.297402	4.08047	0.0728841	0.941898	NA	0	0	0.90856	0	0	0.694526
ENSMUST00000023555	0.318922	0.297401	3.97047	0.0749034	0.940292	NA	0	1.21901	0	0	0	0.694526	Hspbap1
ENSMUST00000023559	1.80933	1.18485	1.70135	0.69642	0.486166	NA	1.13279	0	6.35992	1.02013	0.954094	1.38905	Ehhadh
ENSMUST00000023572	5.92299	-1.23914	0.938079	-1.32094	0.186522	NA	5.66395	1.21901	3.63424	11.2214	4.77047	9.02883	Cxadr
ENSMUST00000023593	4.42104	2.22914	1.17457	1.89784	0.0577173	NA	6.79674	8.53306	6.35992	1.02013	3.81638	0	Adipoq
ENSMUST00000023599	1.94917	0.0897616	1.72329	0.0520873	0.958459	NA	2.26558	0	3.63424	5.10065	0	0.694526	Eif4a2
ENSMUST00000023610	3.26426	0.350843	1.26074	0.278284	0.780795	NA	1.13279	6.09504	3.63424	6.12078	1.90819	0.694526	Adamts1
ENSMUST00000023629	2.85432	1.01711	1.34168	0.758087	0.448399	NA	2.26558	7.31405	1.81712	4.08052	0.954094	0.694526	Pros1
ENSMUST00000023660	1.1677	2.68533	2.17556	1.23431	0.217086	NA	1.13279	1.21901	3.63424	1.02013	0	0	Ripply3
ENSMUST00000023670	1.33853	0.110823	1.95433	0.0567065	0.954779	NA	2.26558	0	1.81712	2.04026	1.90819	0	Clic6
ENSMUST00000023684	0.741574	-2.89666	2.80511	-1.03264	0.301774	NA	0	0	0	3.06039	0	1.38905
ENSMUST00000023687	0.902032	-0.371458	2.5157	-0.147656	0.882614	NA	1.13279	1.21901	0	3.06039	0	0	Ifngr2
ENSMUST00000023689	1.74909	0.190204	1.69108	0.112475	0.910447	NA	3.39837	1.21901	0.90856	3.06039	1.90819	0	Ifnar1
ENSMUST00000023712	0.78838	-0.290958	2.45271	-0.118627	0.905571	NA	0	1.21901	0.90856	0	1.90819	0.694526
ENSMUST00000023734	1.32907	-0.295944	1.98362	-0.149194	0.881401	NA	0	3.65702	0	1.02013	1.90819	1.38905	Wnt1
ENSMUST00000023736	0.543212	-0.775783	3.24926	-0.238757	0.811294	NA	0	1.21901	0	2.04026	0	0	Lmbr1l
ENSMUST00000023752	0.434677	-0.340788	3.52745	-0.0966103	0.923036	NA	0	1.21901	0	0	0	1.38905	Aqp2
ENSMUST00000023759	2.47978	-0.279079	1.3966	-0.199827	0.841616	NA	3.39837	2.43802	0.90856	1.02013	5.72456	1.38905	Smarcd1
ENSMUST00000023760	3.00813	-0.469646	1.24501	-0.377223	0.706008	NA	4.53116	1.21901	1.81712	5.10065	1.90819	3.47263	Gpd1
ENSMUST00000023761	4.61567	1.68733	1.0399	1.62259	0.104677	NA	7.92953	6.09504	7.26848	1.02013	1.90819	3.47263	Cox14
ENSMUST00000023768	0.681106	0.499515	2.78267	0.17951	0.857538	NA	0	2.43802	0	0	0.954094	0.694526
ENSMUST00000023769	4.27824	-0.615956	1.09697	-0.561508	0.574451	NA	4.53116	0	5.45136	5.10065	5.72456	4.86168	Atf1
ENSMUST00000023774	1.13607	-1.17207	2.18757	-0.535786	0.592106	NA	1.13279	0	0.90856	4.08052	0	0.694526	Slc11a2
ENSMUST00000023803	0.952512	-0.574738	2.16088	-0.265975	0.790259	NA	1.13279	1.21901	0	1.02013	0.954094	1.38905	Krt18
ENSMUST00000023809	0.231509	-1.29121	4.06281	-0.317811	0.750628	NA	0	0	0	0	0	1.38905
ENSMUST00000023828	0.534362	0.354141	3.26091	0.108602	0.913518	NA	0	0	1.81712	0	0	1.38905
ENSMUST00000023835	0.755234	-1.63308	2.48842	-0.656273	0.511648	NA	0	0	0.90856	1.02013	1.90819	0.694526	Slc10a2
ENSMUST00000023856	0.73753	1.03586	2.67343	0.387463	0.698413	NA	0	1.21901	1.81712	0	0	1.38905	Msrb2
ENSMUST00000023869	5.49346	-0.547816	0.998292	-0.548753	0.583175	NA	10.1951	2.43802	0.90856	5.10065	6.67866	7.63978	Denr
ENSMUST00000023882	0.795078	-2.99235	3.01702	-0.991823	0.321284	NA	0	0	0	0	4.77047	0	Sympk
ENSMUST00000023886	0.928673	-0.943983	2.46783	-0.382515	0.70208	NA	0	0	1.81712	3.06039	0	0.694526	Sult1c2
ENSMUST00000023918	4.60776	0.158198	1.03168	0.153339	0.878131	NA	1.13279	6.09504	7.26848	6.12078	2.86228	4.16715	Ivns1abp
ENSMUST00000023924	3.58706	1.56657	1.18918	1.31736	0.187719	NA	5.66395	4.87603	5.45136	1.02013	3.81638	0.694526	Rpp14
ENSMUST00000023934	0.491652	2.62476	3.29613	0.796315	0.425849	NA	1.13279	0	1.81712	0	0	0	Hbb-bs
ENSMUST00000023959	0.231509	-1.29121	4.06281	-0.317811	0.750628	NA	0	0	0	0	0	1.38905
ENSMUST00000023965	4.96186	0.608686	0.946115	0.643353	0.519995	NA	6.79674	4.87603	6.35992	3.06039	3.81638	4.86168	Cfhr1
ENSMUST00000024015	0.543393	2.74738	2.94898	0.931638	0.351524	NA	1.13279	1.21901	0.90856	0	0	0	Guca2a
ENSMUST00000024032	3.48556	1.02498	1.18271	0.866642	0.386138	NA	4.53116	1.21901	8.17704	2.04026	2.86228	2.08358	9530002B09Rik
ENSMUST00000024044	1.23648	-2.5241	2.28228	-1.10595	0.268747	NA	0	0	0.90856	0	0.954094	5.5562	Cd4
ENSMUST00000024078	0.609504	2.89514	3.32533	0.870633	0.383955	NA	0	3.65702	0	0	0	0	Marchf5
ENSMUST00000024107	0.406336	2.30922	3.90605	0.591191	0.554393	NA	0	2.43802	0	0	0	0	Wfdc1
ENSMUST00000024119	2.70313	1.64525	1.39765	1.17715	0.239137	NA	4.53116	2.43802	5.45136	1.02013	0	2.7781	Trip6
ENSMUST00000024338	0.354595	2.13548	3.77157	0.566205	0.571255	NA	0	1.21901	0.90856	0	0	0	C1qtnf12
ENSMUST00000024594	0.614813	-2.61936	2.79968	-0.935593	0.349483	NA	0	0	0	2.04026	0.954094	0.694526
ENSMUST00000024595	0.340044	-1.7522	4.02287	-0.435559	0.663156	NA	0	0	0	2.04026	0	0
ENSMUST00000024620	2.12931	-0.816096	1.52601	-0.534792	0.592794	NA	2.26558	2.43802	0	4.08052	1.90819	2.08358	Riok2
ENSMUST00000024627	4.25733	-0.494808	1.0485	-0.471919	0.636985	NA	1.13279	4.87603	4.5428	5.10065	5.72456	4.16715	Chd1
ENSMUST00000024657	1.03656	0.342295	2.19992	0.155594	0.876353	NA	2.26558	1.21901	0	2.04026	0	0.694526	Phf10
ENSMUST00000024696	0.318031	-1.66737	4.02977	-0.413763	0.679048	NA	0	0	0	0	1.90819	0
ENSMUST00000024706	2.97279	-0.510678	1.2972	-0.393677	0.693819	NA	1.13279	2.43802	3.63424	6.12078	3.81638	0.694526	Pla2g7
ENSMUST00000024708	2.29189	1.02007	1.50863	0.67616	0.498939	NA	0	3.65702	5.45136	2.04026	1.90819	0.694526	Tnfrsf21
ENSMUST00000024725	4.93512	0.159578	1.10282	0.1447	0.884948	NA	9.06232	0	6.35992	6.12078	6.67866	1.38905	Efhb
ENSMUST00000024731	4.29559	-0.211071	1.0245	-0.206024	0.836772	NA	2.26558	6.09504	3.63424	5.10065	3.81638	4.86168	Spats1
ENSMUST00000024749	3.54721	0.510275	1.26654	0.402888	0.687031	NA	0	6.09504	6.35992	1.02013	5.72456	2.08358	Polh
ENSMUST00000024755	2.01214	0.175617	1.83816	0.0955398	0.923886	NA	4.53116	0	1.81712	0	5.72456	0	Clic5
ENSMUST00000024761	3.4842	1.2206	1.28253	0.951714	0.341242	NA	2.26558	2.43802	9.99416	2.04026	0	4.16715	Fbxl17
ENSMUST00000024773	0.622584	-1.16789	2.8465	-0.410292	0.681592	NA	1.13279	0	0	0	1.90819	0.694526	Prph2
ENSMUST00000024778	0.362184	0.297401	3.78278	0.0786196	0.937335	NA	0	1.21901	0	0	0.954094	0
ENSMUST00000024817	2.59147	-0.812015	1.42869	-0.568364	0.569788	NA	0	4.87603	0.90856	2.04026	2.86228	4.86168	Rnf8
ENSMUST00000024826	0.846247	3.40209	2.50151	1.36002	0.173824	NA	1.13279	1.21901	2.72568	0	0	0
ENSMUST00000024829	1.30812	2.89179	2.10894	1.3712	0.170311	NA	1.13279	1.21901	4.5428	0	0.954094	0	Abcg1
ENSMUST00000024832	0.318031	-1.66737	4.02977	-0.413763	0.679048	NA	0	0	0	0	1.90819	0	Rsph1
ENSMUST00000024840	1.15062	0.644239	1.9856	0.324455	0.745593	NA	1.13279	1.21901	1.81712	2.04026	0	0.694526	Arhgap28
ENSMUST00000024857	2.1578	0.246695	1.51036	0.163335	0.870255	NA	0	2.43802	4.5428	1.02013	2.86228	2.08358	Lbh
ENSMUST00000024860	2.52384	0.5511	1.36995	0.402278	0.687479	NA	1.13279	6.09504	1.81712	3.06039	0.954094	2.08358	Ehd3
ENSMUST00000024870	1.5018	0.589377	1.68875	0.349001	0.727089	NA	1.13279	2.43802	1.81712	1.02013	1.90819	0.694526	Slc30a6
ENSMUST00000024880	0.534362	0.354141	3.26091	0.108602	0.913518	NA	0	0	1.81712	0	0	1.38905
ENSMUST00000024894	2.25763	-1.66138	1.55952	-1.06532	0.286732	NA	0	2.43802	0.90856	2.04026	1.90819	6.25073	Cyp1b1
ENSMUST00000024905	0.426197	-0.52329	3.28364	-0.159363	0.873383	NA	0	0	0.90856	0	0.954094	0.694526	Ralbp1
ENSMUST00000024906	4.65315	-0.247377	0.974586	-0.253828	0.799628	NA	3.39837	4.87603	4.5428	4.08052	4.77047	6.25073	Twsg1
ENSMUST00000024909	0.758651	-0.499191	2.64643	-0.188628	0.850384	NA	0	0	1.81712	2.04026	0	0.694526
ENSMUST00000024916	1.42178	2.19832	2.14262	1.026	0.304893	NA	2.26558	4.87603	0	0	0	1.38905
ENSMUST00000024931	0.267181	0.297402	4.08047	0.0728841	0.941898	NA	0	0	0.90856	0	0	0.694526
ENSMUST00000024959	2.78855	0.579694	1.39457	0.415679	0.677645	NA	2.26558	2.43802	5.45136	1.02013	0	5.5562	Cript
ENSMUST00000024967	3.06486	1.01557	1.22598	0.828373	0.40746	NA	5.66395	4.87603	1.81712	2.04026	1.90819	2.08358	Msh2
ENSMUST00000024976	1.78775	1.14747	1.62124	0.707774	0.479086	NA	2.26558	2.43802	2.72568	0	1.90819	1.38905	Spsb3
ENSMUST00000024981	4.50101	0.505316	1.17033	0.431773	0.665906	NA	1.13279	4.87603	9.99416	1.02013	0.954094	9.02883	Jpt2
ENSMUST00000024984	1.91813	-0.70412	1.62339	-0.433734	0.664482	NA	1.13279	2.43802	0.90856	0	2.86228	4.16715	Tmem204
ENSMUST00000025003	0.883618	3.45491	2.44945	1.41048	0.158397	NA	2.26558	1.21901	1.81712	0	0	0	Sox8
ENSMUST00000025004	0.420307	-0.339649	3.57139	-0.0951027	0.924233	NA	1.13279	0	0	0	0	1.38905	Adgre4
ENSMUST00000025027	1.16727	3.8378	2.44096	1.57225	0.115894	NA	0	6.09504	0.90856	0	0	0	Cuta
ENSMUST00000025046	3.01033	2.54205	1.3675	1.8589	0.0630418	NA	5.66395	6.09504	3.63424	1.02013	0.954094	0.694526	Ip6k3
ENSMUST00000025065	5.57625	-0.636266	0.906375	-0.70199	0.482686	NA	3.39837	6.09504	3.63424	7.14091	7.63275	5.5562	Nudt12
ENSMUST00000025076	1.10761	-2.26847	2.32139	-0.977206	0.328467	NA	1.13279	0	0	2.04026	0	3.47263	Lyzl1
ENSMUST00000025081	5.17894	0.452404	0.946876	0.477786	0.632803	NA	6.79674	8.53306	2.72568	4.08052	4.77047	4.16715	Zeb1
ENSMUST00000025083	1.49501	-0.0504017	1.71009	-0.0294732	0.976487	NA	2.26558	1.21901	0.90856	1.02013	2.86228	0.694526	Kif5b
ENSMUST00000025106	0.463017	-2.25479	3.68553	-0.611795	0.540673	NA	0	0	0	0	0	2.7781
ENSMUST00000025110	0.477047	-2.25463	3.65591	-0.616709	0.537427	NA	0	0	0	0	2.86228	0
ENSMUST00000025161	0.285776	-1.52701	4.04209	-0.377777	0.705596	NA	0	0	0	1.02013	0	0.694526	Tapbp
ENSMUST00000025170	5.66964	-0.107809	0.945174	-0.114063	0.909188	NA	1.13279	6.09504	9.0856	4.08052	6.67866	6.94526	Wdr46
ENSMUST00000025181	0.362184	0.297401	3.78278	0.0786196	0.937335	NA	0	1.21901	0	0	0.954094	0
ENSMUST00000025183	0.603807	-2.59763	2.816	-0.922456	0.356291	NA	0	0	0	1.02013	1.90819	0.694526
ENSMUST00000025202	4.87529	-0.652321	0.975746	-0.668535	0.503792	NA	3.39837	2.43802	5.45136	4.08052	7.63275	6.25073	Kcnc1
ENSMUST00000025223	1.11747	-0.283333	2.1314	-0.132933	0.894247	NA	1.13279	0	1.81712	3.06039	0	0.694526	Cyp21a1
ENSMUST00000025234	2.61504	0.587128	1.3181	0.445435	0.656005	NA	1.13279	3.65702	4.5428	3.06039	1.90819	1.38905	Epb41l4a
ENSMUST00000025236	5.35153	-0.144996	0.963909	-0.150425	0.880429	NA	10.1951	2.43802	2.72568	4.08052	5.72456	6.94526	Stard4
ENSMUST00000025237	0.506278	-2.37425	3.24807	-0.730971	0.464797	NA	0	0	0	0	0.954094	2.08358
ENSMUST00000025249	0.951961	-1.98595	2.46091	-0.806999	0.419667	NA	0	1.21901	0	1.02013	0	3.47263	Apom
ENSMUST00000025253	0.613296	1.57337	3.08832	0.50946	0.61043	NA	0	0	2.72568	0	0.954094	0	Prrc2a
ENSMUST00000025254	1.92899	3.52585	2.00963	1.75448	0.0793487	NA	9.06232	0	1.81712	0	0	0.694526	Lims2
ENSMUST00000025270	0.377597	2.21781	4.02186	0.55144	0.581332	NA	2.26558	0	0	0	0	0
ENSMUST00000025271	2.47378	0.298037	1.5023	0.198387	0.842742	NA	2.26558	1.21901	4.5428	6.12078	0	0.694526	Pou5f1
ENSMUST00000025273	0.935178	0.840576	2.4644	0.341087	0.733038	NA	1.13279	2.43802	0	2.04026	0	0	Psors1c2
ENSMUST00000025278	0.231509	-1.29121	4.06281	-0.317811	0.750628	NA	0	0	0	0	0	1.38905
ENSMUST00000025279	3.07228	0.841841	1.27715	0.659156	0.509796	NA	2.26558	4.87603	4.5428	5.10065	0.954094	0.694526	Npc1
ENSMUST00000025290	0.695628	0.257932	2.95784	0.087203	0.93051	NA	2.26558	0	0	0	1.90819	0	Impact
ENSMUST00000025295	4.49132	1.38333	1.26648	1.09226	0.274718	NA	5.66395	3.65702	9.99416	0	7.63275	0	Spry4
ENSMUST00000025319	0.463017	-2.25479	3.68553	-0.611795	0.540673	NA	0	0	0	0	0	2.7781
ENSMUST00000025357	0.231509	-1.29121	4.06281	-0.317811	0.750628	NA	0	0	0	0	0	1.38905	Ap3s1
ENSMUST00000025358	0.938916	-0.981294	2.65268	-0.369926	0.711438	NA	0	0	1.81712	0	3.81638	0	Lvrn
ENSMUST00000025363	0.35882	0.297401	3.79607	0.0783444	0.937554	NA	1.13279	0	0	1.02013	0	0	Hbegf
ENSMUST00000025377	0.491652	2.62476	3.29613	0.796315	0.425849	NA	1.13279	0	1.81712	0	0	0	Ppp2r2b
ENSMUST00000025393	2.91638	-1.08953	1.41523	-0.76986	0.441383	NA	1.13279	3.65702	0.90856	0	7.63275	4.16715	Smad4
ENSMUST00000025403	5.4624	-0.596943	0.97831	-0.610178	0.541744	NA	9.06232	1.21901	2.72568	9.18118	5.72456	4.86168	Impa2
ENSMUST00000025404	0.897988	3.47371	2.43803	1.4248	0.154214	NA	1.13279	2.43802	1.81712	0	0	0	Cidea
ENSMUST00000025406	1.36915	1.09078	1.85866	0.586864	0.557295	NA	2.26558	2.43802	0.90856	0	1.90819	0.694526	Srfbp1
ENSMUST00000025411	1.56948	-1.10083	1.758	-0.626182	0.531195	NA	1.13279	0	1.81712	2.04026	0.954094	3.47263	Prelid3a
ENSMUST00000025419	0.853284	0.477525	2.50331	0.190758	0.848715	NA	0	1.21901	1.81712	0	0	2.08358
ENSMUST00000025462	2.36303	2.86641	1.64531	1.74217	0.0814788	NA	3.39837	7.31405	1.81712	0	0.954094	0.694526	Rbfa
ENSMUST00000025472	0.488944	-0.5658	3.13175	-0.180666	0.85663	NA	0	1.21901	0	1.02013	0	0.694526	Pcyox1l
ENSMUST00000025474	2.30882	0.238353	1.39016	0.171458	0.863864	NA	2.26558	2.43802	2.72568	4.08052	0.954094	1.38905	Napg
ENSMUST00000025482	4.48007	0.727416	1.05	0.692779	0.488448	NA	5.66395	8.53306	2.72568	1.02013	4.77047	4.16715	Atp8b1
ENSMUST00000025500	2.33557	4.86944	1.8049	2.6979	0.00697789	NA	3.39837	2.43802	8.17704	0	0	0	Slc27a6
ENSMUST00000025503	0.636954	-1.1679	2.82511	-0.413401	0.679313	NA	0	1.21901	0	0	1.90819	0.694526	Isoc1
ENSMUST00000025505	2.43905	-0.33331	1.36869	-0.243525	0.807599	NA	3.39837	1.21901	1.81712	2.04026	4.77047	1.38905	Dctn4
ENSMUST00000025506	1.60237	1.55068	1.75347	0.884347	0.376509	NA	1.13279	2.43802	3.63424	1.02013	0	1.38905	Rbm22
ENSMUST00000025541	2.9142	0.779823	1.29389	0.602697	0.54671	NA	3.39837	4.87603	2.72568	1.02013	4.77047	0.694526	Gnaq
ENSMUST00000025542	0.377597	2.21781	4.02186	0.55144	0.581332	NA	2.26558	0	0	0	0	0
ENSMUST00000025568	5.75412	0.674706	1.01229	0.666517	0.505081	NA	16.9919	2.43802	1.81712	4.08052	5.72456	3.47263	Tmem138
ENSMUST00000025569	1.07327	-2.24165	2.23741	-1.00189	0.316395	NA	0	0	0.90856	1.02013	3.81638	0.694526	Tmem216
ENSMUST00000025570	1.10301	2.57665	2.54168	1.01376	0.310698	NA	5.66395	0	0	0	0.954094	0	Sdhaf2
ENSMUST00000025572	0.510065	-2.3403	3.56404	-0.656643	0.51141	NA	0	0	0	3.06039	0	0
ENSMUST00000025581	0.891483	1.13067	2.51149	0.450199	0.652567	NA	0	0	3.63424	1.02013	0	0.694526	Ms4a4d
ENSMUST00000025601	2.33067	-1.13922	1.43703	-0.792759	0.427918	NA	1.13279	2.43802	0.90856	2.04026	1.90819	5.5562	Lpxn
ENSMUST00000025618	0.390524	-1.99539	3.59882	-0.554457	0.579266	NA	0	0	0	0	0.954094	1.38905	Pcsk5
ENSMUST00000025631	0.302853	1.9429	4.05892	0.478675	0.63217	NA	0	0	1.81712	0	0	0
ENSMUST00000025632	1.68277	-0.288306	1.73789	-0.165895	0.86824	NA	0	3.65702	0.90856	1.02013	3.81638	0.694526	Carnmt1
ENSMUST00000025641	0.390524	-1.99539	3.59882	-0.554457	0.579266	NA	0	0	0	0	0.954094	1.38905
ENSMUST00000025647	1.51558	-1.74705	1.83162	-0.953826	0.340172	NA	1.13279	0	0.90856	3.06039	1.90819	2.08358	Pga5
ENSMUST00000025656	3.41154	3.47554	1.60556	2.16469	0.0304117	NA	12.4607	0	6.35992	0	0.954094	0.694526	Aldh1a7
ENSMUST00000025659	0.267181	0.297402	4.08047	0.0728841	0.941898	NA	0	0	0.90856	0	0	0.694526	Zfand5
ENSMUST00000025666	2.37167	-0.170558	1.42909	-0.119347	0.905	NA	4.53116	1.21901	0.90856	3.06039	3.81638	0.694526	Slc22a19
ENSMUST00000025669	0.382935	-0.336617	3.69733	-0.0910433	0.927458	NA	0	0	0.90856	0	0	1.38905	Gm16437
ENSMUST00000025675	0.391966	2.26108	3.62965	0.622948	0.533318	NA	1.13279	1.21901	0	0	0	0	Naa40
ENSMUST00000025679	0.354595	2.13548	3.77157	0.566205	0.571255	NA	0	1.21901	0.90856	0	0	0	Otub1
ENSMUST00000025680	4.58424	-0.0925491	1.02911	-0.0899309	0.928342	NA	6.79674	4.87603	1.81712	2.04026	5.72456	6.25073	Lipf
ENSMUST00000025685	0.285776	-1.52701	4.04209	-0.377777	0.705596	NA	0	0	0	1.02013	0	0.694526	Lipm
ENSMUST00000025686	1.12941	-1.00926	2.30431	-0.437988	0.661395	NA	2.26558	0	0	0	3.81638	0.694526	Ankrd22
ENSMUST00000025694	1.92469	0.570588	1.71649	0.332415	0.739576	NA	3.39837	3.65702	0	1.02013	0	3.47263	Lipo3
ENSMUST00000025695	2.36706	-1.47921	1.62996	-0.90751	0.364137	NA	0	0	3.63424	1.02013	1.90819	7.63978	Ppp2r5b
ENSMUST00000025702	1.252	0.269602	1.98914	0.135537	0.892187	NA	2.26558	0	1.81712	2.04026	0	1.38905	Snx15
ENSMUST00000025704	3.79922	-1.32021	1.20193	-1.0984	0.272028	NA	3.39837	1.21901	1.81712	10.2013	4.77047	1.38905	Cdca5
ENSMUST00000025711	0.607406	1.66916	2.86762	0.582071	0.560519	NA	1.13279	0	1.81712	0	0	0.694526	Vps51
ENSMUST00000025714	0.491652	2.62476	3.29613	0.796315	0.425849	NA	1.13279	0	1.81712	0	0	0
ENSMUST00000025729	4.82418	0.170119	0.969924	0.175395	0.86077	NA	3.39837	3.65702	8.17704	4.08052	4.77047	4.86168	Tnks2
ENSMUST00000025739	0.783933	3.26209	2.76289	1.18068	0.23773	NA	2.26558	2.43802	0	0	0	0
ENSMUST00000025740	0.628474	-1.28751	3.06977	-0.419415	0.674913	NA	0	0	0.90856	0	2.86228	0
ENSMUST00000025745	1.10135	-0.415846	2.29118	-0.181498	0.855976	NA	0	0	2.72568	1.02013	2.86228	0	Mrpl21
ENSMUST00000025751	2.02596	-0.370839	1.56469	-0.237005	0.812653	NA	2.26558	1.21901	1.81712	0	4.77047	2.08358	Ighmbp2
ENSMUST00000025752	3.53989	1.16186	1.15213	1.00845	0.313241	NA	5.66395	3.65702	5.45136	2.04026	0.954094	3.47263	Pola2
ENSMUST00000025755	0.900771	-0.701747	2.20227	-0.318648	0.749994	NA	1.13279	0	0.90856	1.02013	0.954094	1.38905	Dmrt1
ENSMUST00000025774	4.0658	0.605031	1.13726	0.532006	0.594722	NA	9.06232	1.21901	4.5428	3.06039	0.954094	5.5562	Sf3b2
ENSMUST00000025778	3.67788	1.34311	1.1849	1.13352	0.256996	NA	7.92953	6.09504	1.81712	1.02013	3.81638	1.38905	Gldc
ENSMUST00000025797	0.340044	-1.7522	4.02287	-0.435559	0.663156	NA	0	0	0	2.04026	0	0
ENSMUST00000025803	4.41961	0.72985	1.25441	0.581829	0.560682	NA	0	8.53306	8.17704	0	2.86228	6.94526	Dkk1
ENSMUST00000025805	1.4977	-1.68756	1.96547	-0.858602	0.39056	NA	0	1.21901	0.90856	4.08052	0	2.7781	Cnih2
ENSMUST00000025811	1.01779	-0.694624	2.25402	-0.308171	0.757952	NA	1.13279	1.21901	0	3.06039	0	0.694526	Yif1a
ENSMUST00000025831	5.52811	-0.131738	0.891693	-0.147739	0.882549	NA	4.53116	4.87603	6.35992	6.12078	5.72456	5.5562	Dock8
ENSMUST00000025834	0.609504	2.89514	3.32533	0.870633	0.383955	NA	0	3.65702	0	0	0	0	Peli3
ENSMUST00000025850	5.26697	-0.415251	1.05096	-0.395116	0.692757	NA	1.13279	9.75206	2.72568	11.2214	1.90819	4.86168	Fosl1
ENSMUST00000025851	0.406336	2.30922	3.90605	0.591191	0.554393	NA	0	2.43802	0	0	0	0
ENSMUST00000025867	4.63916	1.36579	1.03059	1.32525	0.185089	NA	4.53116	7.31405	8.17704	4.08052	0.954094	2.7781	Rela
ENSMUST00000025904	1.50454	0.72647	1.92841	0.37672	0.706382	NA	5.66395	0	0	1.02013	0.954094	1.38905	Prdx5
ENSMUST00000025912	0.347263	-1.8428	4.01591	-0.458875	0.646324	NA	0	0	0	0	0	2.08358
ENSMUST00000025921	1.64972	-1.76383	2.22316	-0.793388	0.427552	NA	2.26558	0	0	0	7.63275	0	Mark2
ENSMUST00000025925	1.1307	1.35779	2.48518	0.546355	0.584822	NA	0	4.87603	0	0	1.90819	0	Plaat3
ENSMUST00000025931	1.76724	4.45487	1.9324	2.30536	0.0211466	NA	4.53116	2.43802	3.63424	0	0	0	Pdcd4
ENSMUST00000025961	3.59982	3.53416	1.47906	2.38946	0.0168731	NA	2.26558	8.53306	9.0856	1.02013	0	0.694526	Prdx3
ENSMUST00000025966	1.7006	-1.16551	1.81149	-0.6434	0.519965	NA	2.26558	0	0.90856	0	2.86228	4.16715	Cyp2c55
ENSMUST00000025983	0.506021	2.65898	3.26163	0.815231	0.41494	NA	0	1.21901	1.81712	0	0	0
ENSMUST00000026008	2.40984	0.384313	1.44637	0.26571	0.790463	NA	3.39837	1.21901	3.63424	2.04026	0	4.16715	Trim8
ENSMUST00000026021	0.957511	-2.04086	2.47472	-0.824681	0.409553	NA	0	0	0.90856	1.02013	3.81638	0	Msr1
ENSMUST00000026029	4.29573	-1.4315	1.13664	-1.25942	0.207878	NA	2.26558	0	4.5428	6.12078	3.81638	9.02883	Samt4
ENSMUST00000026036	5.67334	4.15189	1.4031	2.95909	0.00308547	NA	18.1246	12.1901	1.81712	0	1.90819	0	Nr0b1
ENSMUST00000026043	3.50489	-0.721795	1.42854	-0.505267	0.613371	NA	6.79674	1.21901	0	0	9.54094	3.47263	Slk
ENSMUST00000026068	5.38148	1.31848	0.948228	1.39047	0.164387	NA	6.79674	10.9711	5.45136	2.04026	2.86228	4.16715	Vwa2
ENSMUST00000026073	0.437203	-0.565682	3.25416	-0.173833	0.861996	NA	0	0	0.90856	1.02013	0	0.694526	Trub1
ENSMUST00000026081	1.96344	1.62623	1.62841	0.998659	0.31796	NA	4.53116	2.43802	1.81712	2.04026	0.954094	0	Pnliprp2
ENSMUST00000026092	0.35882	0.297401	3.79607	0.0783444	0.937554	NA	1.13279	0	0	1.02013	0	0	3110040N11Rik
ENSMUST00000026094	1.03567	-0.792492	2.35612	-0.336354	0.736604	NA	2.26558	0	0	2.04026	1.90819	0	Hdgfl3
ENSMUST00000026120	0.605707	2.93586	3.31881	0.884612	0.376366	NA	0	0	3.63424	0	0	0
ENSMUST00000026125	4.19	-0.167354	1.26811	-0.131971	0.895007	NA	3.39837	0	8.17704	11.2214	0.954094	1.38905	Alyref
ENSMUST00000026129	2.5987	1.18338	1.39916	0.84578	0.397676	NA	3.39837	3.65702	3.63424	2.04026	2.86228	0	Pcyt2
ENSMUST00000026142	1.11578	0.181562	2.27339	0.0798642	0.936345	NA	0	3.65702	0	0	0.954094	2.08358	Maged1
ENSMUST00000026169	1.62053	0.957015	1.8745	0.510543	0.609671	NA	0	0	6.35992	1.02013	0.954094	1.38905	Ogfod3
ENSMUST00000026210	3.65439	-0.376184	1.10693	-0.339845	0.733973	NA	3.39837	2.43802	3.63424	6.12078	2.86228	3.47263	Cpn1
ENSMUST00000026227	4.17061	0.869453	1.0608	0.819623	0.412431	NA	7.92953	3.65702	4.5428	2.04026	4.77047	2.08358	Twnk
ENSMUST00000026243	5.34731	0.653614	0.941311	0.694366	0.487453	NA	6.79674	7.31405	5.45136	7.14091	1.90819	3.47263	Oga
ENSMUST00000026256	0.469458	-0.699888	3.42451	-0.204376	0.838059	NA	0	0	0.90856	0	1.90819	0	Fbxl15
ENSMUST00000026259	0.49147	-0.77878	3.36821	-0.231215	0.817148	NA	0	0	0.90856	2.04026	0	0	Pitx3
ENSMUST00000026264	0.488053	-2.28049	3.31331	-0.688282	0.491275	NA	0	0	0	1.02013	1.90819	0	Arih1
ENSMUST00000026313	4.9176	-1.03534	0.976329	-1.06044	0.288943	NA	4.53116	2.43802	2.72568	7.14091	5.72456	6.94526
ENSMUST00000026322	1.51629	-2.76134	2.11125	-1.30792	0.190902	NA	0	1.21901	0	5.10065	0	2.7781	Polr3a
ENSMUST00000026325	3.01341	-1.2483	1.25313	-0.996146	0.319179	NA	1.13279	2.43802	1.81712	3.06039	4.77047	4.86168	4933436I01Rik
ENSMUST00000026328	0.661492	-1.3687	3.01777	-0.453545	0.650156	NA	0	0	0.90856	3.06039	0	0	Prdx4
ENSMUST00000026360	1.22558	-0.481745	1.91533	-0.251521	0.801411	NA	0	1.21901	1.81712	1.02013	1.90819	1.38905	Itgb8
ENSMUST00000026367	0.956767	0.700934	2.60022	0.269568	0.787493	NA	0	3.65702	0	0	0	2.08358
ENSMUST00000026378	1.21293	0.801212	2.21404	0.361877	0.717444	NA	0	0	4.5428	2.04026	0	0.694526	Padi1
ENSMUST00000026381	0.231509	-1.29121	4.06281	-0.317811	0.750628	NA	0	0	0	0	0	1.38905
ENSMUST00000026398	1.20929	1.43911	2.21911	0.64851	0.516655	NA	3.39837	0	1.81712	2.04026	0	0	Mettl7b
ENSMUST00000026410	0.749344	-1.54437	2.49072	-0.620048	0.535226	NA	1.13279	0	0	1.02013	0.954094	1.38905	Dnajc14
ENSMUST00000026414	0.592801	-2.57622	3.07131	-0.838802	0.401581	NA	0	0	0	0	2.86228	0.694526	Dgka
ENSMUST00000026427	0.64796	-1.19481	2.63968	-0.452636	0.650811	NA	0	1.21901	0	1.02013	0.954094	0.694526
ENSMUST00000026434	4.33158	-0.707344	1.11929	-0.631958	0.527415	NA	3.39837	0	6.35992	4.08052	3.81638	8.33431	Chmp6
ENSMUST00000026455	2.31555	0.279202	1.45895	0.191372	0.848234	NA	0	4.87603	2.72568	2.04026	2.86228	1.38905	Mip
ENSMUST00000026459	0.935178	0.840576	2.4644	0.341087	0.733038	NA	1.13279	2.43802	0	2.04026	0	0	Atp5b
ENSMUST00000026472	0.340044	-1.7522	4.02287	-0.435559	0.663156	NA	0	0	0	2.04026	0	0
ENSMUST00000026474	1.51173	-1.6747	1.98052	-0.845583	0.397785	NA	0	1.21901	0.90856	4.08052	2.86228	0	Gli1
ENSMUST00000026486	0.499059	-2.30828	3.28667	-0.702315	0.482483	NA	0	0	0	2.04026	0.954094	0	Katnal2
ENSMUST00000026495	4.56562	1.4647	1.04695	1.39902	0.161808	NA	9.06232	4.87603	6.35992	1.02013	1.90819	4.16715	Atp5a1
ENSMUST00000026498	2.4079	-0.449168	1.41812	-0.316735	0.751445	NA	0	2.43802	3.63424	2.04026	2.86228	3.47263	Crisp1
ENSMUST00000026500	0.593692	-1.04433	2.88978	-0.361389	0.717809	NA	0	1.21901	0	0	0.954094	1.38905	Avil
ENSMUST00000026504	0.833576	2.19085	2.57772	0.849919	0.39537	NA	3.39837	0	0.90856	0	0	0.694526	Atp23
ENSMUST00000026506	3.70306	-2.61027	1.31336	-1.98747	0.0468705	NA	0	1.21901	1.81712	8.16104	4.77047	6.25073	Clns1a
ENSMUST00000026520	0.869353	-0.291298	2.69898	-0.107929	0.914052	NA	0	2.43802	0	0	0	2.7781	Paip1
ENSMUST00000026537	0.49147	-0.77878	3.36821	-0.231215	0.817148	NA	0	0	0.90856	2.04026	0	0
ENSMUST00000026548	0.62582	-2.64351	3.01428	-0.876994	0.38049	NA	0	0	0	3.06039	0	0.694526	Adgra1
ENSMUST00000026552	0.955039	-0.803789	2.1704	-0.370342	0.711127	NA	1.13279	0	0.90856	2.04026	0.954094	0.694526	Cyp2e1
ENSMUST00000026558	4.78435	0.889982	1.22855	0.724414	0.468811	NA	9.06232	9.75206	0	0	5.72456	4.16715	Ric8a
ENSMUST00000026559	2.6727	0.0370353	1.55874	0.0237597	0.981044	NA	3.39837	0	4.5428	7.14091	0.954094	0	Sirt3
ENSMUST00000026561	1.37553	0.734036	1.93208	0.37992	0.704005	NA	3.39837	0	1.81712	0	0.954094	2.08358	Cox8b
ENSMUST00000026562	0.74638	0.265141	2.88515	0.0918983	0.926779	NA	0	2.43802	0	2.04026	0	0	Ifitm5
ENSMUST00000026565	0.354595	2.13548	3.77157	0.566205	0.571255	NA	0	1.21901	0.90856	0	0	0	Ifitm3
ENSMUST00000026569	2.5458	-0.146558	1.49674	-0.0979184	0.921997	NA	0	3.65702	3.63424	0	3.81638	4.16715	Drd4
ENSMUST00000026572	0.803793	0.925955	2.44063	0.379392	0.704397	NA	2.26558	0	0.90856	0	0.954094	0.694526	Hras
ENSMUST00000026585	1.85275	1.5167	1.78549	0.849456	0.395628	NA	4.53116	3.65702	0	1.02013	1.90819	0	Tspan4
ENSMUST00000026613	0.54954	-2.47883	3.13404	-0.790939	0.428979	NA	0	0	0	0	1.90819	1.38905	Gusb
ENSMUST00000026617	2.73394	1.03705	1.29649	0.79989	0.423775	NA	3.39837	4.87603	2.72568	3.06039	0.954094	1.38905	Phkg1
ENSMUST00000026631	0.557763	2.77939	3.14957	0.882467	0.377524	NA	0	2.43802	0.90856	0	0	0	Fgf14
ENSMUST00000026635	3.54332	-0.191209	1.22491	-0.1561	0.875954	NA	3.39837	0	6.35992	6.12078	1.90819	3.47263	Farp1
ENSMUST00000026658	1.98045	-0.522385	1.68248	-0.310485	0.756193	NA	0	1.21901	3.63424	0	2.86228	4.16715	Tnrc6c
ENSMUST00000026661	1.10058	-0.106156	2.11702	-0.0501439	0.960008	NA	2.26558	0	0.90856	2.04026	0	1.38905	Tk1
ENSMUST00000026662	3.92062	-0.841283	1.09151	-0.770751	0.440855	NA	2.26558	2.43802	3.63424	4.08052	7.63275	3.47263	Cbx2
ENSMUST00000026663	0.613296	1.57337	3.08832	0.50946	0.61043	NA	0	0	2.72568	0	0.954094	0	Cbx8
ENSMUST00000026665	3.56922	-0.538273	1.16203	-0.463218	0.643208	NA	5.66395	1.21901	1.81712	6.12078	3.81638	2.7781	Cbx4
ENSMUST00000026681	0.665037	1.70163	2.78367	0.611291	0.541007	NA	0	1.21901	1.81712	0	0.954094	0
ENSMUST00000026698	5.2868	-0.197932	0.933377	-0.21206	0.83206	NA	5.66395	3.65702	5.45136	7.14091	2.86228	6.94526	Podxl
ENSMUST00000026699	2.70513	-1.12878	1.33604	-0.844869	0.398184	NA	1.13279	1.21901	2.72568	2.04026	2.86228	6.25073	Mkln1
ENSMUST00000026703	1.72806	-0.644861	1.68888	-0.381827	0.70259	NA	0	1.21901	2.72568	4.08052	0.954094	1.38905	Bach1
ENSMUST00000026723	3.04608	0.661216	1.21533	0.544063	0.586398	NA	4.53116	4.87603	1.81712	3.06039	1.90819	2.08358	Hprt
ENSMUST00000026735	1.6404	0.456663	1.74145	0.262232	0.793143	NA	0	4.87603	0.90856	1.02013	0.954094	2.08358	Ccdc51
ENSMUST00000026760	0.536612	1.25137	3.26258	0.383553	0.70131	NA	2.26558	0	0	0	0.954094	0
ENSMUST00000026827	1.98326	3.52581	1.99537	1.767	0.0772287	NA	9.06232	0	1.81712	1.02013	0	0	Mettl26
ENSMUST00000026839	1.06548	2.5774	2.24439	1.14837	0.250814	NA	1.13279	3.65702	0.90856	0	0	0.694526	Prps2
ENSMUST00000026841	1.93752	0.865052	1.52664	0.566639	0.570959	NA	4.53116	1.21901	1.81712	1.02013	0.954094	2.08358	Hadhb
ENSMUST00000026858	0.329037	-1.70869	3.88407	-0.439924	0.659992	NA	0	0	0	1.02013	0.954094	0	Plk4
ENSMUST00000026866	1.36942	0.554138	1.84845	0.299786	0.76434	NA	0	1.21901	3.63424	1.02013	0.954094	1.38905	Sclt1
ENSMUST00000026879	1.01141	-1.14447	2.36364	-0.484197	0.628246	NA	0	0	1.81712	0	2.86228	1.38905	Gdap1
ENSMUST00000026886	5.6374	0.657773	1.00341	0.655535	0.512123	NA	6.79674	4.87603	9.0856	6.12078	0	6.94526	Itih5
ENSMUST00000026890	2.00005	0.67385	1.59487	0.422511	0.672652	NA	0	3.65702	3.63424	3.06039	0.954094	0.694526	Clec3b
ENSMUST00000026896	2.16319	1.26262	1.57445	0.801945	0.422585	NA	4.53116	3.65702	0.90856	1.02013	2.86228	0	St8sia2
ENSMUST00000026897	5.33473	-0.636146	1.06729	-0.596038	0.55115	NA	7.92953	4.87603	0	3.06039	5.72456	10.4179	Slco3a1
ENSMUST00000026901	3.26425	-0.657247	1.1862	-0.55408	0.579524	NA	3.39837	2.43802	1.81712	2.04026	5.72456	4.16715	Rpl14-ps1
ENSMUST00000026902	2.64009	-0.0191196	1.53934	-0.0124207	0.99009	NA	3.39837	0	4.5428	0	0.954094	6.94526	Rassf3
ENSMUST00000026907	4.56758	0.334714	1.0068	0.332454	0.739547	NA	2.26558	8.53306	4.5428	4.08052	3.81638	4.16715	Klkb1
ENSMUST00000026917	1.88182	0.96755	1.76208	0.549096	0.582939	NA	1.13279	0	6.35992	1.02013	0	2.7781	Nrp1
ENSMUST00000026926	1.25807	1.83395	2.08145	0.881093	0.378268	NA	2.26558	0	3.63424	0	0.954094	0.694526	Sec61a2
ENSMUST00000026972	1.02386	1.15588	2.11749	0.545872	0.585154	NA	1.13279	1.21901	1.81712	1.02013	0.954094	0	Fam20c
ENSMUST00000026987	4.15362	1.19389	1.07012	1.11566	0.264569	NA	6.79674	6.09504	4.5428	3.06039	0.954094	3.47263	Nop16
ENSMUST00000026988	1.07896	1.27838	2.3411	0.546061	0.585024	NA	0	3.65702	0.90856	0	1.90819	0	Arl10
ENSMUST00000026989	3.20331	-0.230799	1.25064	-0.184545	0.853586	NA	4.53116	2.43802	1.81712	3.06039	6.67866	0.694526	4833439L19Rik
ENSMUST00000026999	1.20193	0.832727	2.09862	0.396798	0.691516	NA	0	0	4.5428	1.02013	0.954094	0.694526	Smad7
ENSMUST00000027032	2.31327	-0.83217	1.47006	-0.566077	0.571341	NA	0	1.21901	3.63424	4.08052	2.86228	2.08358	Rp1
ENSMUST00000027036	0.536612	1.25137	3.26258	0.383553	0.70131	NA	2.26558	0	0	0	0.954094	0	Lypla1
ENSMUST00000027040	0.592801	-2.57622	3.07131	-0.838802	0.401581	NA	0	0	0	0	2.86228	0.694526
ENSMUST00000027050	0.650486	-1.33689	2.80987	-0.475783	0.634229	NA	0	0	0.90856	2.04026	0.954094	0	Cops5
ENSMUST00000027056	0.231509	-1.29121	4.06281	-0.317811	0.750628	NA	0	0	0	0	0	1.38905	Prex2
ENSMUST00000027059	0.907552	0.326684	2.28981	0.142669	0.886552	NA	0	1.21901	1.81712	1.02013	0	1.38905	Tfap2b
ENSMUST00000027071	0.973634	-2.00125	2.30324	-0.868883	0.384911	NA	1.13279	0	0	3.06039	0.954094	0.694526	Lactb2
ENSMUST00000027083	3.80614	1.22331	1.15968	1.05487	0.291483	NA	2.26558	3.65702	9.99416	1.02013	3.81638	2.08358	Pth2r
ENSMUST00000027103	1.32734	-1.47626	2.05841	-0.717184	0.47326	NA	1.13279	0	0.90856	3.06039	2.86228	0	Fastkd2
ENSMUST00000027121	3.90663	-1.31118	1.2191	-1.07554	0.282135	NA	5.66395	1.21901	0	5.10065	3.81638	7.63978	Rftn2
ENSMUST00000027125	1.00696	1.37526	2.1391	0.642916	0.520279	NA	2.26558	1.21901	0.90856	0	0.954094	0.694526	Coq10b
ENSMUST00000027137	0.40153	-2.0291	3.56107	-0.569802	0.568812	NA	0	0	0	1.02013	0	1.38905
ENSMUST00000027139	1.08238	2.52999	2.34939	1.07687	0.281538	NA	0	3.65702	1.81712	1.02013	0	0
ENSMUST00000027144	2.03598	-0.427396	1.52295	-0.280637	0.778989	NA	0	2.43802	2.72568	3.06039	1.90819	2.08358	Cps1
ENSMUST00000027146	0.579323	-1.04383	2.91361	-0.35826	0.720149	NA	1.13279	0	0	0	0.954094	1.38905
ENSMUST00000027153	2.31594	1.51706	1.53387	0.989042	0.322643	NA	5.66395	0	4.5428	2.04026	0.954094	0.694526	Acadl
ENSMUST00000027164	2.37107	-1.06778	1.49833	-0.712643	0.476067	NA	2.26558	2.43802	0	1.02013	5.72456	2.7781	Ctla4
ENSMUST00000027172	0.35882	0.297401	3.79607	0.0783444	0.937554	NA	1.13279	0	0	1.02013	0	0	Ica1l
ENSMUST00000027173	4.90289	-0.298755	1.0754	-0.277808	0.781159	NA	1.13279	8.53306	3.63424	1.02013	9.54094	5.5562	Wdr12
ENSMUST00000027178	3.96468	-0.507339	1.1736	-0.432292	0.66553	NA	0	2.43802	7.26848	3.06039	4.77047	6.25073	Als2
ENSMUST00000027185	1.84216	-1.51736	1.9602	-0.774085	0.438881	NA	0	0	2.72568	0	7.63275	0.694526	Stradb
ENSMUST00000027186	3.37384	-1.23494	1.2298	-1.00418	0.315293	NA	1.13279	1.21901	3.63424	3.06039	2.86228	8.33431	Trak2
ENSMUST00000027189	4.47809	-1.1821	1.15641	-1.02222	0.306678	NA	1.13279	7.31405	0	7.14091	5.72456	5.5562	Casp8
ENSMUST00000027198	4.52637	1.14677	1.01152	1.13371	0.256915	NA	5.66395	4.87603	8.17704	3.06039	1.90819	3.47263	Orc2
ENSMUST00000027217	0.777428	0.812649	2.46319	0.329917	0.741462	NA	1.13279	0	1.81712	1.02013	0	0.694526	Ecrg4
ENSMUST00000027231	3.99178	3.69214	1.43203	2.57826	0.00992999	NA	3.39837	9.75206	9.0856	1.02013	0	0.694526	Slc9a2
ENSMUST00000027233	3.30405	-0.376701	1.16648	-0.322937	0.746743	NA	2.26558	3.65702	2.72568	5.10065	1.90819	4.16715	Slc9a4
ENSMUST00000027241	0.547619	1.25117	3.23931	0.386246	0.699315	NA	2.26558	0	0	1.02013	0	0
ENSMUST00000027243	0.406336	2.30922	3.90605	0.591191	0.554393	NA	0	2.43802	0	0	0	0
ENSMUST00000027247	0.354595	2.13548	3.77157	0.566205	0.571255	NA	0	1.21901	0.90856	0	0	0
ENSMUST00000027265	1.54446	2.33255	1.95998	1.19009	0.234011	NA	4.53116	2.43802	0.90856	0	0	1.38905	Osgepl1
ENSMUST00000027266	0.455798	-2.19032	3.39665	-0.644847	0.519026	NA	0	0	0	2.04026	0	0.694526	Ormdl1
ENSMUST00000027287	3.86066	0.597602	1.10922	0.538757	0.590055	NA	2.26558	6.09504	5.45136	5.10065	2.86228	1.38905	Inpp4a
ENSMUST00000027291	1.63307	-0.839003	1.86742	-0.449284	0.653227	NA	0	3.65702	0	1.02013	0.954094	4.16715	Zap70
ENSMUST00000027297	3.58787	0.468836	1.19577	0.392079	0.694999	NA	1.13279	4.87603	6.35992	6.12078	0.954094	2.08358	Plekhb2
ENSMUST00000027302	2.35818	-1.7116	1.53795	-1.11291	0.265747	NA	0	2.43802	0.90856	2.04026	6.67866	2.08358	Ptpn18
ENSMUST00000027303	5.01239	0.933894	1.04699	0.891983	0.372402	NA	7.92953	7.31405	4.5428	6.12078	0	4.16715	Imp4
ENSMUST00000027315	0.27477	-1.47986	4.0465	-0.365714	0.714579	NA	0	0	0	0	0.954094	0.694526
ENSMUST00000027322	3.55654	0.854435	1.29819	0.658176	0.510425	NA	10.1951	3.65702	0	3.06039	0.954094	3.47263	Rhbdd1
ENSMUST00000027331	1.58418	0.625723	1.88997	0.331076	0.740587	NA	4.53116	1.21901	0	3.06039	0	0.694526	Tm4sf20
ENSMUST00000027337	5.87234	-1.88367	0.97195	-1.93803	0.0526198	NA	4.53116	1.21901	1.81712	9.18118	6.67866	11.8069	Fam135a
ENSMUST00000027343	0.724367	0.339422	2.91575	0.11641	0.907328	NA	0	2.43802	0	0	1.90819	0	Ogfrl1
ENSMUST00000027356	1.85972	-0.101675	1.63384	-0.0622303	0.950379	NA	2.26558	1.21901	1.81712	2.04026	3.81638	0	Cyp27a1
ENSMUST00000027357	0.779526	1.92451	2.8504	0.67517	0.499568	NA	0	3.65702	0	1.02013	0	0	Rnf25
ENSMUST00000027377	0.636063	-2.67007	3.27281	-0.815833	0.414595	NA	0	0	0	0	3.81638	0	Igfbp5
ENSMUST00000027384	1.81057	0.0476569	1.55068	0.0307328	0.975483	NA	3.39837	1.21901	0.90856	2.04026	1.90819	1.38905	Atic
ENSMUST00000027405	0.607406	1.66916	2.86762	0.582071	0.560519	NA	1.13279	0	1.81712	0	0	0.694526	Slc23a3
ENSMUST00000027409	5.18439	-1.29527	1.08469	-1.19415	0.232421	NA	6.79674	2.43802	0	4.08052	6.67866	11.1124	Des
ENSMUST00000027414	0.231509	-1.29121	4.06281	-0.317811	0.750628	NA	0	0	0	0	0	1.38905
ENSMUST00000027422	3.34284	-1.1335	1.32115	-0.857967	0.390911	NA	1.13279	2.43802	2.72568	6.12078	0	7.63978	Slc16a14
ENSMUST00000027425	0.318031	-1.66737	4.02977	-0.413763	0.679048	NA	0	0	0	0	1.90819	0	Itm2c
ENSMUST00000027432	1.43976	-0.0361924	1.78099	-0.0203215	0.983787	NA	0	2.43802	1.81712	2.04026	0.954094	1.38905	Psmd1
ENSMUST00000027434	0.340225	2.08636	3.83303	0.54431	0.586228	NA	1.13279	0	0.90856	0	0	0	Armc9
ENSMUST00000027438	5.86249	-0.24224	0.93561	-0.258911	0.795704	NA	7.92953	3.65702	4.5428	2.04026	11.4491	5.5562	Ncl
ENSMUST00000027449	1.87265	-1.38681	1.6539	-0.838508	0.401746	NA	0	1.21901	1.81712	2.04026	4.77047	1.38905	Nppc
ENSMUST00000027464	4.48979	-0.187121	1.06074	-0.176406	0.859975	NA	2.26558	4.87603	5.45136	7.14091	0.954094	6.25073	Mrpl44
ENSMUST00000027467	1.81016	2.199	1.95147	1.12684	0.259808	NA	0	6.09504	2.72568	2.04026	0	0	Serpine2
ENSMUST00000027470	5.83431	-0.506129	0.973027	-0.520159	0.602953	NA	5.66395	2.43802	6.35992	1.02013	10.495	9.02883	Chrng
ENSMUST00000027487	0.318922	0.297401	3.97047	0.0749034	0.940292	NA	0	1.21901	0	0	0	0.694526
ENSMUST00000027488	0.724367	0.339422	2.91575	0.11641	0.907328	NA	0	2.43802	0	0	1.90819	0	Capn10
ENSMUST00000027495	0.541951	-1.0425	2.98013	-0.349817	0.726476	NA	0	0	0.90856	0	0.954094	1.38905	Septin2
ENSMUST00000027502	3.97027	1.39506	1.15934	1.20332	0.228852	NA	3.39837	7.31405	6.35992	5.10065	0.954094	0.694526	Atg4b
ENSMUST00000027503	0.595134	2.86151	3.07828	0.929581	0.352588	NA	1.13279	2.43802	0	0	0	0	Dtymk
ENSMUST00000027507	0.595134	2.86151	3.07828	0.929581	0.352588	NA	1.13279	2.43802	0	0	0	0
ENSMUST00000027528	1.1738	2.75445	2.28845	1.20363	0.228733	NA	4.53116	0	1.81712	0	0	0.694526	Mlph
ENSMUST00000027533	1.28256	0.787609	2.02796	0.388375	0.697738	NA	1.13279	0	3.63424	1.02013	1.90819	0	Klhl30
ENSMUST00000027559	1.27819	-1.27189	2.04633	-0.621549	0.534239	NA	2.26558	0	0	3.06039	0.954094	1.38905	Tnfrsf11a
ENSMUST00000027565	0.302853	1.9429	4.05892	0.478675	0.63217	NA	0	0	1.81712	0	0	0
ENSMUST00000027566	1.19358	-3.604	2.21253	-1.62891	0.103333	NA	0	0	0	2.04026	0.954094	4.16715	Serpinb11
ENSMUST00000027580	3.75214	-1.04015	1.17859	-0.882538	0.377486	NA	2.26558	2.43802	2.72568	5.10065	0.954094	9.02883	Slc35f5
ENSMUST00000027603	5.82258	0.461376	0.911299	0.506284	0.612657	NA	3.39837	9.75206	7.26848	3.06039	3.81638	7.63978	Rgs18
ENSMUST00000027623	3.44761	-0.0253654	1.18455	-0.0214136	0.982916	NA	4.53116	1.21901	4.5428	1.02013	3.81638	5.5562	Tsn
ENSMUST00000027626	4.81815	-0.515181	1.00221	-0.514043	0.607222	NA	6.79674	2.43802	2.72568	7.14091	2.86228	6.94526	Nifk
ENSMUST00000027637	0.920808	0.813042	2.47604	0.328364	0.742637	NA	2.26558	1.21901	0	2.04026	0	0	3110009E18Rik
ENSMUST00000027639	4.37956	-0.707735	1.03495	-0.683836	0.494079	NA	4.53116	3.65702	1.81712	6.12078	6.67866	3.47263	Marco
ENSMUST00000027650	2.31244	-1.10095	1.41307	-0.77912	0.435909	NA	1.13279	2.43802	0.90856	3.06039	2.86228	3.47263	Cd55
ENSMUST00000027655	2.33464	-0.220345	1.37552	-0.16019	0.872731	NA	2.26558	2.43802	1.81712	3.06039	0.954094	3.47263	Ddx59
ENSMUST00000027657	2.94375	0.136002	1.35952	0.100037	0.920315	NA	2.26558	6.09504	0.90856	1.02013	6.67866	0.694526	C4bp
ENSMUST00000027667	0.506278	-2.37425	3.24807	-0.730971	0.464797	NA	0	0	0	0	0.954094	2.08358	Pkp1
ENSMUST00000027684	1.11577	0.33992	2.45433	0.138498	0.889847	NA	0	0	3.63424	3.06039	0	0
ENSMUST00000027690	0.318031	-1.66737	4.02977	-0.413763	0.679048	NA	0	0	0	0	1.90819	0	Avpr1b
ENSMUST00000027697	1.83362	-2.08655	1.72758	-1.20779	0.227129	NA	1.13279	0	0.90856	3.06039	3.81638	2.08358	Cdk18
ENSMUST00000027700	0.302853	1.9429	4.05892	0.478675	0.63217	NA	0	0	1.81712	0	0	0	Rbbp5
ENSMUST00000027706	0.884427	0.849598	2.69983	0.314685	0.753001	NA	3.39837	0	0	0	1.90819	0	Lrrn2
ENSMUST00000027730	1.45934	-0.63315	1.80758	-0.350276	0.726132	NA	2.26558	1.21901	0	1.02013	2.86228	1.38905	Myog
ENSMUST00000027740	0.27477	-1.47986	4.0465	-0.365714	0.714579	NA	0	0	0	0	0.954094	0.694526	Lhx4
ENSMUST00000027743	3.26462	1.73029	1.23373	1.40248	0.160771	NA	3.39837	6.09504	5.45136	2.04026	1.90819	0.694526	Stx6
ENSMUST00000027748	3.6394	0.590657	1.1525	0.5125	0.608301	NA	4.53116	6.09504	2.72568	1.02013	1.90819	5.5562	Rgs16
ENSMUST00000027752	4.04527	0.329626	1.06031	0.310876	0.755895	NA	5.66395	2.43802	5.45136	2.04026	3.81638	4.86168	Lamc1
ENSMUST00000027778	1.30627	0.169533	1.98699	0.0853213	0.932006	NA	2.26558	0	1.81712	3.06039	0	0.694526	Mixl1
ENSMUST00000027792	3.47678	0.460683	1.3193	0.349188	0.726948	NA	9.06232	1.21901	1.81712	0	6.67866	2.08358	Srp9
ENSMUST00000027802	0.755194	3.21842	3.0661	1.04968	0.293865	NA	4.53116	0	0	0	0	0
ENSMUST00000027810	3.30381	-1.32194	1.2891	-1.02548	0.305139	NA	0	4.87603	0.90856	5.10065	4.77047	4.16715	Fh1
ENSMUST00000027826	3.90393	0.503634	1.13619	0.443267	0.657573	NA	2.26558	9.75206	1.81712	2.04026	4.77047	2.7781	Dusp23
ENSMUST00000027852	1.39538	0.303433	1.97131	0.153924	0.877669	NA	3.39837	1.21901	0	3.06039	0	0.694526	Adcy10
ENSMUST00000027853	0.45428	2.52164	3.71856	0.678124	0.497693	NA	0	0	2.72568	0	0	0
ENSMUST00000027859	5.13202	1.46782	0.987417	1.48653	0.13714	NA	4.53116	9.75206	8.17704	4.08052	2.86228	1.38905	Tbx19
ENSMUST00000027860	1.0856	-2.2404	2.3335	-0.960103	0.337003	NA	1.13279	0	0	0	1.90819	3.47263	Xcl1
ENSMUST00000027866	2.53295	-1.30248	1.38131	-0.942934	0.345715	NA	1.13279	2.43802	0.90856	2.04026	3.81638	4.86168	Blzf1
ENSMUST00000027895	2.35841	-0.331039	1.36237	-0.242987	0.808015	NA	2.26558	1.21901	2.72568	2.04026	3.81638	2.08358	Axdnd1
ENSMUST00000027916	1.37535	-0.676214	1.83625	-0.368258	0.712681	NA	2.26558	0	0.90856	2.04026	0.954094	2.08358	Bpnt1
ENSMUST00000027929	1.95234	1.58878	1.71672	0.925476	0.354718	NA	2.26558	1.21901	5.45136	0	0	2.7781	Mark1
ENSMUST00000027933	1.67959	0.878664	1.6888	0.520289	0.602862	NA	2.26558	2.43802	1.81712	0	2.86228	0.694526	Dtl
ENSMUST00000027947	2.2995	-2.60255	1.73239	-1.50229	0.133023	NA	0	0	1.81712	4.08052	0.954094	6.94526	Angel2
ENSMUST00000027959	0.231509	-1.29121	4.06281	-0.317811	0.750628	NA	0	0	0	0	0	1.38905
ENSMUST00000027961	5.65211	0.949396	1.01478	0.935566	0.349496	NA	2.26558	14.6281	5.45136	7.14091	0.954094	3.47263	Hspa14
ENSMUST00000027970	2.43357	1.86141	1.60028	1.16318	0.244756	NA	7.92953	0	3.63424	0	0.954094	2.08358	Dusp12
ENSMUST00000027973	1.7569	-1.25397	1.71903	-0.729464	0.465718	NA	0	1.21901	1.81712	2.04026	4.77047	0.694526	Sephs1
ENSMUST00000027988	1.49861	2.12571	1.86659	1.13882	0.254779	NA	3.39837	1.21901	2.72568	0	0.954094	0.694526	Ccdc3
ENSMUST00000027989	0.579323	-1.04383	2.91361	-0.35826	0.720149	NA	1.13279	0	0	0	0.954094	1.38905	Hsd17b7
ENSMUST00000027997	4.78106	1.37566	1.03817	1.32507	0.185147	NA	9.06232	3.65702	8.17704	1.02013	1.90819	4.86168	Rgs5
ENSMUST00000028005	4.89832	-0.0300791	0.973919	-0.0308846	0.975362	NA	3.39837	8.53306	2.72568	5.10065	4.77047	4.86168	Mgst3
ENSMUST00000028017	0.76852	1.92484	2.86418	0.672037	0.50156	NA	0	3.65702	0	0	0.954094	0	Mettl13
ENSMUST00000028035	1.20344	-1.45646	2.0964	-0.694741	0.487217	NA	0	0	1.81712	3.06039	0.954094	1.38905
ENSMUST00000028049	3.98634	1.17392	1.13225	1.03681	0.299825	NA	3.39837	8.53306	4.5428	5.10065	0.954094	1.38905	Rabgap1l
ENSMUST00000028071	3.37539	0.117868	1.1532	0.102209	0.91859	NA	2.26558	3.65702	4.5428	5.10065	1.90819	2.7781	Bmi1
ENSMUST00000028081	1.49889	1.45244	1.93282	0.751461	0.452376	NA	1.13279	0	5.45136	1.02013	0	1.38905	Plxdc2
ENSMUST00000028084	0.302853	1.9429	4.05892	0.478675	0.63217	NA	0	0	1.81712	0	0	0
ENSMUST00000028087	1.3626	2.98905	2.19297	1.36302	0.172877	NA	5.66395	0	1.81712	0	0	0.694526	Ppp6c
ENSMUST00000028103	0.499241	1.13024	3.10965	0.36346	0.716261	NA	1.13279	0	0.90856	0	0.954094	0	Lypd6b
ENSMUST00000028106	0.461869	0.994502	3.4476	0.288463	0.772993	NA	0	0	1.81712	0	0.954094	0
ENSMUST00000028113	2.63767	0.889882	1.32339	0.672426	0.501312	NA	3.39837	2.43802	4.5428	1.02013	0.954094	3.47263	Potegl
ENSMUST00000028123	1.07079	-1.06711	2.06874	-0.515826	0.605976	NA	1.13279	0	0.90856	2.04026	0.954094	1.38905	Gad2
ENSMUST00000028135	2.39157	-2.35289	1.81582	-1.29577	0.195054	NA	0	2.43802	0	7.14091	4.77047	0	Niban2
ENSMUST00000028161	4.2306	2.69483	1.21322	2.22122	0.0263361	NA	5.66395	10.9711	5.45136	0	1.90819	1.38905	Cel
ENSMUST00000028162	5.91201	-0.830135	0.891793	-0.93086	0.351926	NA	3.39837	4.87603	4.5428	8.16104	4.77047	9.72336	Ptges2
ENSMUST00000028175	0.839103	-3.05789	2.72489	-1.12221	0.261774	NA	0	0	0	4.08052	0.954094	0	Cytip
ENSMUST00000028187	5.85714	3.17558	1.10737	2.86768	0.00413492	NA	12.4607	7.31405	11.8113	0	2.86228	0.694526	Lamc3
ENSMUST00000028190	1.3023	-1.47949	1.93999	-0.762628	0.445685	NA	1.13279	0	0.90856	2.04026	0.954094	2.7781	Abl1
ENSMUST00000028205	4.38398	-1.0955	1.06217	-1.03139	0.302359	NA	1.13279	3.65702	3.63424	4.08052	4.77047	9.02883	BC005624
ENSMUST00000028207	0.644596	-1.22367	2.81531	-0.434647	0.663819	NA	1.13279	0	0	2.04026	0	0.694526	Crat
ENSMUST00000028209	2.28657	-1.22929	1.60547	-0.765687	0.443862	NA	2.26558	0	1.81712	4.08052	0	5.5562	Dolpp1
ENSMUST00000028222	1.60852	-0.512724	1.71341	-0.299242	0.764755	NA	0	1.21901	2.72568	1.02013	1.90819	2.7781	Hspa5
ENSMUST00000028225	1.97438	-1.52261	1.6164	-0.941972	0.346207	NA	0	1.21901	1.81712	2.04026	1.90819	4.86168	Psmd5
ENSMUST00000028248	0.536061	-0.900148	3.241	-0.277738	0.781214	NA	1.13279	0	0	0	0	2.08358	Ttll11
ENSMUST00000028257	2.51711	0.1502	1.42166	0.105652	0.915859	NA	3.39837	0	4.5428	2.04026	0.954094	4.16715	Gca
ENSMUST00000028291	1.10647	-0.257083	2.0116	-0.1278	0.898307	NA	1.13279	0	1.81712	2.04026	0.954094	0.694526	Inpp5e
ENSMUST00000028299	5.66991	0.110354	0.911645	0.12105	0.903652	NA	6.79674	3.65702	7.26848	5.10065	2.86228	8.33431	1700019N19Rik
ENSMUST00000028311	0.231509	-1.29121	4.06281	-0.317811	0.750628	NA	0	0	0	0	0	1.38905	Traf2
ENSMUST00000028320	1.42564	-2.68952	2.00044	-1.34446	0.178799	NA	1.13279	0	0	2.04026	1.90819	3.47263	Neb
ENSMUST00000028329	1.11401	2.57657	2.53367	1.01693	0.309185	NA	5.66395	0	0	1.02013	0	0
ENSMUST00000028337	4.8129	0.309146	0.974715	0.317166	0.751118	NA	5.66395	4.87603	5.45136	2.04026	6.67866	4.16715	Lrrc26
ENSMUST00000028340	3.07626	1.14748	1.27283	0.901518	0.367313	NA	3.39837	4.87603	4.5428	0	2.86228	2.7781	Tmem210
ENSMUST00000028347	2.65524	-2.71663	1.706	-1.5924	0.111295	NA	0	1.21901	0.90856	4.08052	0	9.72336	Rbms1
ENSMUST00000028363	3.22315	-2.30648	1.33158	-1.73214	0.0832492	NA	1.13279	1.21901	0.90856	7.14091	4.77047	4.16715	Il36b
ENSMUST00000028368	0.613296	1.57337	3.08832	0.50946	0.61043	NA	0	0	2.72568	0	0.954094	0	Wdsub1
ENSMUST00000028389	0.510247	1.13048	3.08705	0.366201	0.714215	NA	1.13279	0	0.90856	1.02013	0	0	Frzb
ENSMUST00000028398	0.673517	1.81466	2.77445	0.65406	0.513073	NA	0	2.43802	0.90856	0	0	0.694526	Ube2e3
ENSMUST00000028403	2.91523	-0.563429	1.31455	-0.428608	0.668208	NA	3.39837	0	3.63424	2.04026	2.86228	5.5562	Cybrd1
ENSMUST00000028426	5.422	0.515657	0.933445	0.552424	0.580658	NA	7.92953	8.53306	2.72568	5.10065	4.77047	3.47263	Cers6
ENSMUST00000028465	0.683632	0.157017	2.61196	0.0601147	0.952064	NA	0	1.21901	0.90856	1.02013	0.954094	0	P2rx3
ENSMUST00000028466	0.680087	-2.75617	3.19574	-0.862451	0.388439	NA	0	0	0	4.08052	0	0	Prg3
ENSMUST00000028470	1.6344	3.21313	1.94124	1.65519	0.097885	NA	4.53116	2.43802	1.81712	1.02013	0	0	Timm10
ENSMUST00000028475	0.988003	-2.00102	2.29373	-0.872389	0.382996	NA	0	1.21901	0	3.06039	0.954094	0.694526	Clp1
ENSMUST00000028517	0.665294	-2.75966	2.90942	-0.948526	0.342862	NA	0	0	0	0	1.90819	2.08358	Ola1
ENSMUST00000028525	0.923738	1.00301	2.64568	0.37911	0.704606	NA	0	0	3.63424	0	1.90819	0	Rapgef4
ENSMUST00000028533	1.31651	0.138839	2.12717	0.0652696	0.947959	NA	2.26558	0	1.81712	0	3.81638	0	Fshb
ENSMUST00000028536	1.56948	-1.10083	1.758	-0.626182	0.531195	NA	1.13279	0	1.81712	2.04026	0.954094	3.47263	Arl14ep
ENSMUST00000028552	0.688039	1.75522	2.75396	0.637344	0.523901	NA	2.26558	0	0.90856	0	0.954094	0	Katnbl1
ENSMUST00000028554	5.01402	0.64812	0.978281	0.662509	0.507645	NA	7.92953	4.87603	5.45136	7.14091	1.90819	2.7781	Lpcat4
ENSMUST00000028580	3.38168	0.771853	1.16328	0.663516	0.507	NA	6.79674	2.43802	3.63424	2.04026	1.90819	3.47263	Ccdc34
ENSMUST00000028593	1.67429	-0.417117	1.83914	-0.2268	0.820579	NA	0	2.43802	1.81712	1.02013	4.77047	0	Prrg4
ENSMUST00000028610	1.2874	1.59077	2.10078	0.75723	0.448912	NA	4.53116	1.21901	0	1.02013	0.954094	0	Cat
ENSMUST00000028612	1.68582	0.714513	1.78579	0.40011	0.689075	NA	0	3.65702	2.72568	0	0.954094	2.7781	Pamr1
ENSMUST00000028623	1.60799	2.06759	1.88435	1.09724	0.272536	NA	2.26558	3.65702	1.81712	0	1.90819	0	Ext2
ENSMUST00000028648	0.543393	2.74738	2.94898	0.931638	0.351524	NA	1.13279	1.21901	0.90856	0	0	0
ENSMUST00000028650	2.11492	-0.168053	1.78256	-0.0942762	0.92489	NA	0	6.09504	0	0	3.81638	2.7781	Pex16
ENSMUST00000028661	2.08154	0.138136	1.59823	0.0864304	0.931124	NA	3.39837	1.21901	1.81712	5.10065	0.954094	0	Terb2
ENSMUST00000028665	4.71622	-0.764496	1.02714	-0.744298	0.456696	NA	2.26558	3.65702	4.5428	2.04026	9.54094	6.25073	Patl2
ENSMUST00000028672	1.39219	-1.54064	1.91067	-0.806337	0.420049	NA	0	1.21901	0.90856	1.02013	3.81638	1.38905	Mdk
ENSMUST00000028679	1.20851	-2.38035	2.10186	-1.13249	0.257426	NA	0	1.21901	0	2.04026	1.90819	2.08358	Ell3
ENSMUST00000028691	0.463017	-2.25479	3.68553	-0.611795	0.540673	NA	0	0	0	0	0	2.7781	Arfgap2
ENSMUST00000028704	1.58996	-0.907842	1.8823	-0.482306	0.629589	NA	3.39837	0	0	1.02013	0.954094	4.16715	Hao1
ENSMUST00000028726	2.47533	-0.262895	1.46454	-0.179507	0.85754	NA	0	1.21901	5.45136	3.06039	0.954094	4.16715	Ankef1
ENSMUST00000028737	3.88752	0.551201	1.06983	0.515223	0.606397	NA	5.66395	3.65702	4.5428	4.08052	1.90819	3.47263	Slx4ip
ENSMUST00000028758	5.19693	1.33001	0.996682	1.33443	0.182062	NA	4.53116	6.09504	11.8113	1.02013	2.86228	4.86168	Itpka
ENSMUST00000028769	1.39363	0.22787	1.85965	0.122534	0.902476	NA	1.13279	2.43802	0.90856	1.02013	2.86228	0	Ptpra
ENSMUST00000028771	2.23911	-1.14531	1.50543	-0.760786	0.446785	NA	2.26558	0	1.81712	5.10065	2.86228	1.38905	Nusap1
ENSMUST00000028780	3.7109	0.99365	1.13859	0.872704	0.382825	NA	7.92953	2.43802	4.5428	1.02013	2.86228	3.47263	Chac1
ENSMUST00000028794	0.907552	0.326684	2.28981	0.142669	0.886552	NA	0	1.21901	1.81712	1.02013	0	1.38905	Siglec1
ENSMUST00000028799	1.0486	-3.39523	2.28343	-1.4869	0.137042	NA	0	0	0	2.04026	2.86228	1.38905	Knl1
ENSMUST00000028800	0.329037	-1.70869	3.88407	-0.439924	0.659992	NA	0	0	0	1.02013	0.954094	0	1700037H04Rik
ENSMUST00000028801	2.24077	2.0302	1.4995	1.35392	0.175763	NA	2.26558	4.87603	3.63424	1.02013	0.954094	0.694526	Spef1
ENSMUST00000028802	3.70843	1.56191	1.33116	1.17334	0.24066	NA	6.79674	6.09504	3.63424	0	5.72456	0	Knl1
ENSMUST00000028807	2.18776	2.55088	1.71133	1.49058	0.136071	NA	2.26558	6.09504	2.72568	2.04026	0	0	Ivd
ENSMUST00000028814	0.812919	-0.647968	2.79111	-0.232154	0.816418	NA	0	0	1.81712	3.06039	0	0	Rassf2
ENSMUST00000028815	3.65975	0.333197	1.15121	0.289432	0.772251	NA	4.53116	1.21901	6.35992	2.04026	5.72456	2.08358	Slc23a2
ENSMUST00000028820	2.30402	-0.779814	1.48357	-0.525633	0.599143	NA	2.26558	0	2.72568	5.10065	0.954094	2.7781	Fsip1
ENSMUST00000028821	1.61925	-0.145173	1.70471	-0.0851597	0.932134	NA	2.26558	2.43802	0	1.02013	1.90819	2.08358	Fsip1
ENSMUST00000028822	0.809132	-0.700284	2.56991	-0.272493	0.785243	NA	0	0	1.81712	0	0.954094	2.08358	Gpcpd1
ENSMUST00000028825	4.84856	-1.61404	1.07568	-1.50049	0.133487	NA	0	2.43802	4.5428	9.18118	6.67866	6.25073	Fam98b
ENSMUST00000028829	1.62344	0.206266	1.71942	0.119963	0.904513	NA	0	2.43802	2.72568	1.02013	2.86228	0.694526	Spred1
ENSMUST00000028836	1.4636	0.193342	1.89984	0.101768	0.918941	NA	1.13279	3.65702	0	0	1.90819	2.08358	Bmp2
ENSMUST00000028846	2.30869	4.83556	3.67271	1.31662	0.187967	NA	10.1951	3.65702	0	0	0	0	Dusp2
ENSMUST00000028854	0.45428	2.52164	3.71856	0.678124	0.497693	NA	0	0	2.72568	0	0	0
ENSMUST00000028866	4.71224	-0.992567	1.02018	-0.972933	0.330587	NA	1.13279	3.65702	4.5428	7.14091	7.63275	4.16715	Zc3h8
ENSMUST00000028905	3.36336	0.848872	1.21801	0.696936	0.485843	NA	4.53116	1.21901	7.26848	2.04026	0.954094	4.16715	Pcsk2
ENSMUST00000028915	5.45765	-1.94248	1.04686	-1.85553	0.0635207	NA	4.53116	2.43802	0	8.16104	8.58685	9.02883	Rbbp9
ENSMUST00000028917	0.406336	2.30922	3.90605	0.591191	0.554393	NA	0	2.43802	0	0	0	0	Dtd1
ENSMUST00000028933	0.883618	3.45491	2.44945	1.41048	0.158397	NA	2.26558	1.21901	1.81712	0	0	0	Cstdc1
ENSMUST00000028937	3.78028	0.322869	1.33851	0.241215	0.809389	NA	9.06232	3.65702	0	5.10065	0	4.86168	Cstdc2
ENSMUST00000028938	2.80997	1.71796	1.37315	1.2511	0.210897	NA	3.39837	6.09504	3.63424	0	0.954094	2.7781	Cst3
ENSMUST00000028948	4.53165	0.847638	1.03057	0.822498	0.410794	NA	2.26558	9.75206	5.45136	4.08052	2.86228	2.7781	Gins1
ENSMUST00000028950	1.59784	1.2317	1.79078	0.687799	0.491579	NA	4.53116	1.21901	0.90856	1.02013	1.90819	0	Sdcbp2
ENSMUST00000028955	2.29316	0.732564	1.53741	0.476492	0.633724	NA	0	1.21901	7.26848	1.02013	2.86228	1.38905	Angpt4
ENSMUST00000028964	0.285776	-1.52701	4.04209	-0.377777	0.705596	NA	0	0	0	1.02013	0	0.694526
ENSMUST00000028970	1.43912	-3.8595	2.04792	-1.8846	0.0594837	NA	0	0	0	2.04026	3.81638	2.7781	Mylk2
ENSMUST00000028983	3.63202	0.755305	1.26041	0.599251	0.549005	NA	1.13279	6.09504	6.35992	6.12078	0	2.08358	Bpifb2
ENSMUST00000028985	0.347263	-1.8428	4.01591	-0.458875	0.646324	NA	0	0	0	0	0	2.08358
ENSMUST00000028999	3.1002	0.365493	1.23589	0.295733	0.767434	NA	1.13279	4.87603	4.5428	1.02013	2.86228	4.16715	Pkia
ENSMUST00000029013	1.26456	-0.817473	2.34447	-0.348681	0.727329	NA	0	0	2.72568	0	0	4.86168	Rae1
ENSMUST00000029043	1.59051	-0.175495	1.84457	-0.0951411	0.924203	NA	4.53116	0	0	1.02013	1.90819	2.08358	Fabp12
ENSMUST00000029049	1.39809	1.7247	2.11794	0.814329	0.415456	NA	4.53116	0	1.81712	2.04026	0	0	Chmp4c
ENSMUST00000029061	1.16206	-0.292991	2.08833	-0.140299	0.888424	NA	2.26558	0	0.90856	1.02013	0	2.7781	Sall4
ENSMUST00000029071	1.52255	0.318527	1.67223	0.190481	0.848932	NA	1.13279	1.21901	2.72568	1.02013	0.954094	2.08358	Car13
ENSMUST00000029084	1.45557	1.78691	2.09664	0.852272	0.394063	NA	0	4.87603	1.81712	2.04026	0	0	Ntsr1
ENSMUST00000029090	0.850472	2.12759	2.53855	0.838113	0.401967	NA	2.26558	0	1.81712	1.02013	0	0	Gid8
ENSMUST00000029106	5.89978	-1.17279	0.946625	-1.23891	0.215377	NA	6.79674	2.43802	1.81712	6.12078	5.72456	12.5015	Zbtb46
ENSMUST00000029116	0.437203	-0.565682	3.25416	-0.173833	0.861996	NA	0	0	0.90856	1.02013	0	0.694526	Pcmtd2
ENSMUST00000029124	2.9783	1.72899	1.29358	1.33659	0.181356	NA	2.26558	6.09504	5.45136	1.02013	0.954094	2.08358	Gm9826
ENSMUST00000029125	5.62184	-0.144619	0.9535	-0.151671	0.879446	NA	4.53116	1.21901	9.99416	7.14091	6.67866	4.16715	Armc1
ENSMUST00000029128	4.55903	1.49986	1.051	1.42708	0.153558	NA	3.39837	8.53306	8.17704	2.04026	3.81638	1.38905	Map1lc3a
ENSMUST00000029129	0.390524	-1.99539	3.59882	-0.554457	0.579266	NA	0	0	0	0	0.954094	1.38905
ENSMUST00000029139	2.26063	1.11204	1.40882	0.789339	0.429914	NA	2.26558	2.43802	4.5428	1.02013	1.90819	1.38905	Trim55
ENSMUST00000029164	2.00023	1.83379	1.57444	1.16473	0.244128	NA	1.13279	3.65702	4.5428	1.02013	0.954094	0.694526	Sla2
ENSMUST00000029170	5.49158	-0.0980615	0.922311	-0.106321	0.915327	NA	2.26558	7.31405	6.35992	4.08052	6.67866	6.25073	Rbl1
ENSMUST00000029172	0.347814	0.297401	3.84094	0.0774292	0.938282	NA	1.13279	0	0	0	0.954094	0	Ghrh
ENSMUST00000029179	0.302853	1.9429	4.05892	0.478675	0.63217	NA	0	0	1.81712	0	0	0	Tti1
ENSMUST00000029183	3.68256	-1.43329	1.27357	-1.12541	0.260413	NA	0	1.21901	4.5428	3.06039	10.495	2.7781	Fam83d
ENSMUST00000029188	1.19561	1.90922	2.28579	0.835255	0.403574	NA	0	4.87603	0.90856	0	0	1.38905	Ccn5
ENSMUST00000029196	0.470349	1.17392	3.17213	0.370074	0.711327	NA	0	1.21901	0.90856	0	0	0.694526	Slc2a10
ENSMUST00000029201	1.06827	-0.859226	2.07628	-0.413829	0.678999	NA	1.13279	1.21901	0	1.02013	0.954094	2.08358	Pik3ca
ENSMUST00000029213	1.50041	-0.37002	1.86668	-0.198224	0.84287	NA	1.13279	0	2.72568	3.06039	0	2.08358	Ocstamp
ENSMUST00000029214	0.267181	0.297402	4.08047	0.0728841	0.941898	NA	0	0	0.90856	0	0	0.694526
ENSMUST00000029269	1.87228	-0.423194	1.73022	-0.244589	0.806775	NA	0	4.87603	0	3.06039	1.90819	1.38905	Exosc9
ENSMUST00000029273	1.72166	-2.99531	2.03241	-1.47377	0.140543	NA	1.13279	0	0	0	5.72456	3.47263	Il21
ENSMUST00000029344	1.41527	0.742955	1.80714	0.411123	0.680983	NA	1.13279	2.43802	1.81712	1.02013	0	2.08358	Mfsd1
ENSMUST00000029358	4.11664	1.3611	1.12109	1.21409	0.224712	NA	3.39837	2.43802	11.8113	3.06039	1.90819	2.08358	Nmd3
ENSMUST00000029367	1.31179	0.617249	1.9857	0.310847	0.755917	NA	1.13279	0	3.63424	1.02013	0	2.08358	Bche
ENSMUST00000029371	1.14402	1.64098	2.14865	0.763725	0.445031	NA	3.39837	0	1.81712	0	0.954094	0.694526	Smad9
ENSMUST00000029377	1.20084	3.90342	2.21124	1.76526	0.0775202	NA	1.13279	2.43802	3.63424	0	0	0	Tm4sf4
ENSMUST00000029380	0.347263	-1.8428	4.01591	-0.458875	0.646324	NA	0	0	0	0	0	2.08358
ENSMUST00000029382	1.65721	-1.68677	1.89883	-0.88832	0.374368	NA	0	2.43802	0	2.04026	4.77047	0.694526	Ppid
ENSMUST00000029402	3.77956	1.6126	1.18549	1.36028	0.173742	NA	4.53116	7.31405	5.45136	0	1.90819	3.47263	Slc33a1
ENSMUST00000029406	2.98771	-0.358094	1.34914	-0.265423	0.790684	NA	3.39837	3.65702	0.90856	5.10065	0	4.86168	Vmn2r1
ENSMUST00000029414	4.76443	0.513398	0.989773	0.518703	0.603968	NA	2.26558	7.31405	7.26848	3.06039	3.81638	4.86168	Ssr3
ENSMUST00000029416	1.21463	0.209798	2.02716	0.103494	0.917571	NA	1.13279	0	2.72568	2.04026	0	1.38905
ENSMUST00000029419	3.30783	1.33377	1.40866	0.946833	0.343724	NA	2.26558	7.31405	4.5428	0	5.72456	0	Veph1
ENSMUST00000029421	1.31821	-0.418665	2.15431	-0.194338	0.845911	NA	3.39837	0	0	0	3.81638	0.694526	Ptx3
ENSMUST00000029423	1.13961	0.66849	1.9046	0.350987	0.725598	NA	1.13279	1.21901	1.81712	1.02013	0.954094	0.694526	Serpini1
ENSMUST00000029435	0.879211	2.17383	2.51408	0.864664	0.387223	NA	0	2.43802	1.81712	1.02013	0	0	Dclre1b
ENSMUST00000029444	4.78688	-1.37833	1.12072	-1.22987	0.218746	NA	1.13279	6.09504	0.90856	3.06039	13.3573	4.16715	Trim33
ENSMUST00000029445	5.65135	0.0116538	0.9692	0.0120241	0.990406	NA	10.1951	2.43802	4.5428	5.10065	1.90819	9.72336	Nras
ENSMUST00000029451	1.76417	-0.753845	1.63589	-0.460815	0.644931	NA	1.13279	0	2.72568	2.04026	1.90819	2.7781	Tspan2
ENSMUST00000029459	1.33094	0.819178	1.97941	0.413849	0.678985	NA	2.26558	0	2.72568	2.04026	0.954094	0	Gdap2
ENSMUST00000029476	1.58104	-0.365835	1.71861	-0.212867	0.831431	NA	2.26558	0	1.81712	3.06039	0.954094	1.38905	Sec22b
ENSMUST00000029483	0.461869	0.994502	3.4476	0.288463	0.772993	NA	0	0	1.81712	0	0.954094	0
ENSMUST00000029508	2.68162	-0.261005	1.3889	-0.187923	0.850937	NA	4.53116	0	2.72568	5.10065	0.954094	2.7781	Dennd2d
ENSMUST00000029515	0.565352	1.33559	3.20239	0.417061	0.676634	NA	0	2.43802	0	0	0.954094	0	S100a11
ENSMUST00000029521	0.340044	-1.7522	4.02287	-0.435559	0.663156	NA	0	0	0	2.04026	0	0
ENSMUST00000029530	1.86259	-0.235078	1.53449	-0.153196	0.878243	NA	1.13279	1.21901	2.72568	3.06039	0.954094	2.08358	Lce1a2
ENSMUST00000029540	3.09549	2.68572	1.40047	1.91773	0.0551451	NA	3.39837	7.31405	5.45136	1.02013	0	1.38905	Npr1
ENSMUST00000029545	0.318031	-1.66737	4.02977	-0.413763	0.679048	NA	0	0	0	0	1.90819	0
ENSMUST00000029547	5.5302	-1.0558	1.05095	-1.00461	0.315083	NA	0	2.43802	8.17704	4.08052	6.67866	11.8069	Creb3l4
ENSMUST00000029549	0.644778	1.75503	2.813	0.623899	0.532694	NA	2.26558	0	0.90856	0	0	0.694526	Tpm3
ENSMUST00000029551	1.73049	0.760286	1.67652	0.453491	0.650195	NA	3.39837	1.21901	1.81712	2.04026	1.90819	0
ENSMUST00000029552	0.347263	-1.8428	4.01591	-0.458875	0.646324	NA	0	0	0	0	0	2.08358
ENSMUST00000029568	0.318031	-1.66737	4.02977	-0.413763	0.679048	NA	0	0	0	0	1.90819	0	Tmem144
ENSMUST00000029569	2.29434	-0.729401	1.50172	-0.485711	0.627172	NA	3.39837	0	1.81712	2.04026	0.954094	5.5562	Slc35a3
ENSMUST00000029571	4.98804	-0.247134	1.06053	-0.233029	0.815739	NA	1.13279	2.43802	9.99416	6.12078	1.90819	8.33431	Sass6
ENSMUST00000029574	1.23659	-0.49715	1.91126	-0.260117	0.794774	NA	0	1.21901	1.81712	2.04026	0.954094	1.38905	Vcam1
ENSMUST00000029598	0.506021	2.65898	3.26163	0.815231	0.41494	NA	0	1.21901	1.81712	0	0	0	1700006A11Rik
ENSMUST00000029610	3.27852	4.31771	1.60847	2.68436	0.00726695	NA	5.66395	4.87603	8.17704	0	0.954094	0	Hadh
ENSMUST00000029623	1.85716	2.31188	1.96173	1.17849	0.238602	NA	6.79674	2.43802	0	0	1.90819	0	Tlr2
ENSMUST00000029626	0.550431	-0.901207	3.21038	-0.280717	0.778928	NA	0	1.21901	0	0	0	2.08358	Casp6
ENSMUST00000029629	0.592801	-2.57622	3.07131	-0.838802	0.401581	NA	0	0	0	0	2.86228	0.694526
ENSMUST00000029644	0.231509	-1.29121	4.06281	-0.317811	0.750628	NA	0	0	0	0	0	1.38905
ENSMUST00000029645	1.0036	1.32623	2.26625	0.585209	0.558407	NA	3.39837	0	0.90856	1.02013	0	0.694526	Tdo2
ENSMUST00000029649	1.37608	1.78359	2.13097	0.836984	0.402602	NA	4.53116	0	1.81712	0	1.90819	0	Ctso
ENSMUST00000029651	0.310442	0.297402	4.01182	0.0741313	0.940906	NA	0	0	0.90856	0	0.954094	0	Gstcd
ENSMUST00000029652	1.26151	-2.53174	2.08852	-1.21222	0.225428	NA	0	0	0.90856	1.02013	2.86228	2.7781	Pdgfc
ENSMUST00000029665	0.979523	-2.07267	2.43149	-0.852429	0.393976	NA	0	0	0.90856	3.06039	1.90819	0	Dkk2
ENSMUST00000029669	2.17347	-0.675801	1.50589	-0.448771	0.653597	NA	2.26558	0	2.72568	1.02013	2.86228	4.16715	Dnajb4
ENSMUST00000029673	1.59757	0.00694977	1.82126	0.00381591	0.996955	NA	1.13279	0	3.63424	2.04026	0	2.7781	Efna3
ENSMUST00000029679	2.51427	1.23666	1.48786	0.831163	0.405881	NA	2.26558	0	8.17704	2.04026	1.90819	0.694526	Cks1b
ENSMUST00000029686	2.66109	-0.68491	1.31745	-0.519875	0.603151	NA	1.13279	1.21901	3.63424	4.08052	3.81638	2.08358
ENSMUST00000029709	2.92024	0.32401	1.58737	0.204118	0.838262	NA	0	9.75206	0	6.12078	0.954094	0.694526	Sh2d2a
ENSMUST00000029711	0.231509	-1.29121	4.06281	-0.317811	0.750628	NA	0	0	0	0	0	1.38905	Insrr
ENSMUST00000029712	2.52627	1.67365	1.43297	1.16796	0.242822	NA	4.53116	6.09504	0.90856	1.02013	1.90819	0.694526	Ntrk1
ENSMUST00000029719	0.231509	-1.29121	4.06281	-0.317811	0.750628	NA	0	0	0	0	0	1.38905
ENSMUST00000029727	0.231509	-1.29121	4.06281	-0.317811	0.750628	NA	0	0	0	0	0	1.38905	Fbxw7
ENSMUST00000029748	1.67429	-0.417117	1.83914	-0.2268	0.820579	NA	0	2.43802	1.81712	1.02013	4.77047	0	Fcgr1
ENSMUST00000029761	0.377597	2.21781	4.02186	0.55144	0.581332	NA	2.26558	0	0	0	0	0	Myoz2
ENSMUST00000029766	4.1615	-0.637693	1.04696	-0.609088	0.542466	NA	2.26558	4.87603	2.72568	4.08052	4.77047	6.25073	Bcar3
ENSMUST00000029785	1.51217	-2.77209	1.96516	-1.41061	0.158358	NA	1.13279	0	0	2.04026	3.81638	2.08358	Riiad1
ENSMUST00000029800	0.347263	-1.8428	4.01591	-0.458875	0.646324	NA	0	0	0	0	0	2.08358	Tspan5
ENSMUST00000029803	4.8526	-0.974268	0.999271	-0.974979	0.329571	NA	2.26558	4.87603	2.72568	9.18118	3.81638	6.25073	Eif4e
ENSMUST00000029805	1.24081	-1.35953	1.97757	-0.687473	0.491784	NA	1.13279	0	0.90856	3.06039	0.954094	1.38905	Mttp
ENSMUST00000029806	0.231509	-1.29121	4.06281	-0.317811	0.750628	NA	0	0	0	0	0	1.38905
ENSMUST00000029814	2.56922	-0.112338	1.31338	-0.0855338	0.931837	NA	3.39837	1.21901	2.72568	4.08052	1.90819	2.08358	Manba
ENSMUST00000029815	5.39714	-0.933191	0.978081	-0.954103	0.340031	NA	3.39837	6.09504	1.81712	9.18118	2.86228	9.02883	Cisd2
ENSMUST00000029837	0.73978	1.86418	2.69291	0.692254	0.488778	NA	2.26558	1.21901	0	0	0.954094	0	Uox
ENSMUST00000029838	1.84931	-1.98318	1.74608	-1.13579	0.256044	NA	1.13279	1.21901	0	1.02013	2.86228	4.86168	Rpf1
ENSMUST00000029839	0.267181	0.297402	4.08047	0.0728841	0.941898	NA	0	0	0.90856	0	0	0.694526	Spata1
ENSMUST00000029845	1.60338	4.33424	2.07163	2.09218	0.036422	NA	1.13279	1.21901	7.26848	0	0	0	Ddah1
ENSMUST00000029848	1.66063	-0.983841	1.73664	-0.566519	0.571041	NA	0	2.43802	0.90856	3.06039	2.86228	0.694526	Col24a1
ENSMUST00000029866	0.469458	-0.699888	3.42451	-0.204376	0.838059	NA	0	0	0.90856	0	1.90819	0	Ccne2
ENSMUST00000029877	4.17741	1.84368	1.12617	1.63712	0.101604	NA	4.53116	4.87603	9.99416	3.06039	1.90819	0.694526	Decr1
ENSMUST00000029879	2.88525	0.316126	1.28664	0.2457	0.805915	NA	3.39837	3.65702	2.72568	1.02013	0.954094	5.5562	Nbn
ENSMUST00000029881	0.463017	-2.25479	3.68553	-0.611795	0.540673	NA	0	0	0	0	0	2.7781	Mmp16
ENSMUST00000029885	5.31513	-1.29862	1.01902	-1.27438	0.202528	NA	0	3.65702	5.45136	6.12078	7.63275	9.02883	Cpne3
ENSMUST00000029888	4.7992	-1.09961	1.06521	-1.0323	0.301932	NA	2.26558	6.09504	0.90856	8.16104	8.58685	2.7781	Rmdn1
ENSMUST00000029891	0.566395	2.8031	3.41704	0.82033	0.412028	NA	3.39837	0	0	0	0	0
ENSMUST00000029900	1.6198	0.600679	1.85154	0.324421	0.74562	NA	3.39837	2.43802	0	1.02013	2.86228	0	Atp6v0d2
ENSMUST00000029907	5.65642	1.54584	0.918777	1.6825	0.0924721	NA	7.92953	7.31405	9.99416	3.06039	2.86228	2.7781	Ubxn2b
ENSMUST00000029909	5.04769	1.25135	1.02291	1.22333	0.221207	NA	5.66395	3.65702	11.8113	2.04026	5.72456	1.38905	Coq3
ENSMUST00000029932	0.758833	2.05986	2.65079	0.777075	0.437114	NA	1.13279	0	2.72568	0	0	0.694526	Clca3a1
ENSMUST00000029936	0.614995	0.307694	2.70421	0.113783	0.90941	NA	1.13279	0	0.90856	0	0.954094	0.694526	Gbp2b
ENSMUST00000029941	0.850237	-1.72035	2.56798	-0.66992	0.502909	NA	0	1.21901	0	1.02013	2.86228	0	Pdlim5
ENSMUST00000029950	0.86466	-0.479347	2.55346	-0.187724	0.851093	NA	0	1.21901	0.90856	3.06039	0	0	Casp8ap2
ENSMUST00000029970	1.00471	0.853862	2.35266	0.362935	0.716653	NA	0	1.21901	2.72568	0	0	2.08358	Slc35a1
ENSMUST00000029987	2.50855	-0.800133	1.48847	-0.537553	0.590885	NA	4.53116	0	0.90856	5.10065	3.81638	0.694526	Aldob
ENSMUST00000029999	0.329037	-1.70869	3.88407	-0.439924	0.659992	NA	0	0	0	1.02013	0.954094	0
ENSMUST00000030003	2.50521	0.0692577	1.32984	0.0520797	0.958465	NA	3.39837	2.43802	1.81712	4.08052	1.90819	1.38905	Exosc3
ENSMUST00000030018	4.58637	1.4084	1.23293	1.14232	0.253322	NA	9.06232	0	10.9027	4.08052	0	3.47263	Nans
ENSMUST00000030032	2.31522	-0.0312474	1.51762	-0.0205897	0.983573	NA	3.39837	3.65702	0	1.02013	0.954094	4.86168	Tmeff1
ENSMUST00000030036	0.45428	2.52164	3.71856	0.678124	0.497693	NA	0	0	2.72568	0	0	0
ENSMUST00000030039	1.41438	-0.0391544	1.71437	-0.0228389	0.981779	NA	1.13279	1.21901	1.81712	1.02013	1.90819	1.38905	Fmn2
ENSMUST00000030041	1.24666	1.48824	2.22965	0.66748	0.504466	NA	4.53116	0	0.90856	2.04026	0	0	Ambp
ENSMUST00000030044	0.51361	1.17398	3.07947	0.381228	0.703034	NA	0	1.21901	0.90856	0	0.954094	0
ENSMUST00000030047	3.87276	-0.132135	1.10925	-0.119121	0.90518	NA	1.13279	7.31405	2.72568	4.08052	3.81638	4.16715	Tnfsf8
ENSMUST00000030051	3.76107	0.237389	1.15254	0.205969	0.836815	NA	4.53116	4.87603	2.72568	3.06039	6.67866	0.694526	Txn1
ENSMUST00000030069	3.74784	1.04856	1.30378	0.804246	0.421255	NA	7.92953	0	7.26848	0	3.81638	3.47263	Ptgr1
ENSMUST00000030074	5.36487	0.124917	0.912698	0.136866	0.891137	NA	3.39837	6.09504	7.26848	5.10065	4.77047	5.5562	Ugcg
ENSMUST00000030078	5.93314	-0.165771	0.953141	-0.173921	0.861928	NA	6.79674	2.43802	7.26848	12.2416	4.77047	2.08358	Hsdl2
ENSMUST00000030080	2.12732	2.73011	1.78343	1.53082	0.125815	NA	5.66395	0	5.45136	0	0.954094	0.694526	Snx30
ENSMUST00000030081	0.418608	0.991162	3.57448	0.277289	0.781558	NA	0	0	1.81712	0	0	0.694526	Slc46a2
ENSMUST00000030090	0.231509	-1.29121	4.06281	-0.317811	0.750628	NA	0	0	0	0	0	1.38905
ENSMUST00000030119	0.285776	-1.52701	4.04209	-0.377777	0.705596	NA	0	0	0	1.02013	0	0.694526
ENSMUST00000030122	1.06548	2.5774	2.24439	1.14837	0.250814	NA	1.13279	3.65702	0.90856	0	0	0.694526	Spink4
ENSMUST00000030124	2.88088	-0.576843	1.36778	-0.421737	0.673217	NA	2.26558	0	4.5428	1.02013	6.67866	2.7781	Tal2
ENSMUST00000030127	5.5089	0.16065	0.949458	0.169202	0.865638	NA	7.92953	4.87603	4.5428	4.08052	9.54094	2.08358	Tmem38b
ENSMUST00000030133	1.28707	-0.632013	1.98992	-0.317607	0.750783	NA	0	1.21901	1.81712	0	1.90819	2.7781	Nfx1
ENSMUST00000030142	1.21521	3.91651	2.35323	1.66431	0.0960498	NA	0	3.65702	3.63424	0	0	0	Epb41l4b
ENSMUST00000030158	0.474574	-0.565768	3.1635	-0.178842	0.858061	NA	1.13279	0	0	1.02013	0	0.694526	Dctn3
ENSMUST00000030169	1.60913	0.576383	1.83495	0.314113	0.753435	NA	2.26558	3.65702	0	0	0.954094	2.7781	Stoml2
ENSMUST00000030189	1.79395	-0.193083	1.6181	-0.119327	0.905016	NA	2.26558	0	2.72568	2.04026	0.954094	2.7781	Gba2
ENSMUST00000030192	0.757134	3.25704	3.05215	1.06713	0.285913	NA	0	0	4.5428	0	0	0	Hint2
ENSMUST00000030201	0.721004	0.264762	2.5672	0.103133	0.917858	NA	1.13279	1.21901	0	1.02013	0.954094	0	Gne
ENSMUST00000030202	0.285776	-1.52701	4.04209	-0.377777	0.705596	NA	0	0	0	1.02013	0	0.694526
ENSMUST00000030212	2.06146	4.68207	1.88654	2.48183	0.0130709	NA	1.13279	4.87603	6.35992	0	0	0	Sh3gl2
ENSMUST00000030243	2.47303	0.000213537	1.49388	0.000142941	0.999886	NA	4.53116	1.21901	1.81712	1.02013	0	6.25073	Prkaa2
ENSMUST00000030257	1.93702	1.03472	1.60988	0.642734	0.520397	NA	2.26558	3.65702	1.81712	1.02013	2.86228	0	Cachd1
ENSMUST00000030265	2.73943	0.432247	1.2765	0.338619	0.734897	NA	4.53116	1.21901	3.63424	3.06039	1.90819	2.08358	Dph2
ENSMUST00000030279	0.971289	0.501	2.24374	0.223288	0.823311	NA	2.26558	1.21901	0	0	0.954094	1.38905	Atg4c
ENSMUST00000030280	1.4681	-0.910953	1.79481	-0.507547	0.611771	NA	0	1.21901	1.81712	2.04026	0.954094	2.7781	Angptl3
ENSMUST00000030284	3.43303	-0.153789	1.20846	-0.127261	0.898734	NA	1.13279	1.21901	7.26848	2.04026	4.77047	4.16715	Rnf11
ENSMUST00000030303	2.52554	-0.0924275	1.40145	-0.0659512	0.947417	NA	2.26558	2.43802	2.72568	0	2.86228	4.86168	Cyp2j6
ENSMUST00000030305	2.97859	0.0624612	1.36865	0.0456372	0.963599	NA	5.66395	3.65702	0	2.04026	0.954094	5.5562	Cyp2j13
ENSMUST00000030306	0.347263	-1.8428	4.01591	-0.458875	0.646324	NA	0	0	0	0	0	2.08358	Hook1
ENSMUST00000030313	1.11975	2.57678	2.21403	1.16384	0.244487	NA	1.13279	3.65702	0.90856	1.02013	0	0	Caap1
ENSMUST00000030317	0.354595	2.13548	3.77157	0.566205	0.571255	NA	0	1.21901	0.90856	0	0	0	Pdpn
ENSMUST00000030320	1.51128	3.11835	2.00258	1.55717	0.11943	NA	1.13279	2.43802	4.5428	0	0.954094	0	Cc2d1b
ENSMUST00000030326	0.810831	-1.7218	2.5883	-0.665226	0.505906	NA	1.13279	0	0	0	0.954094	2.7781	Pramel13
ENSMUST00000030328	0.347814	0.297401	3.84094	0.0774292	0.938282	NA	1.13279	0	0	0	0.954094	0	Aadacl4fm1
ENSMUST00000030332	1.36017	-3.75869	2.5322	-1.48436	0.137713	NA	0	0	0	8.16104	0	0	Gpx7
ENSMUST00000030336	1.3894	0.960636	2.08843	0.459981	0.64553	NA	0	3.65702	1.81712	0	2.86228	0	Tnfrsf1b
ENSMUST00000030340	0.919946	2.25763	2.50307	0.901945	0.367086	NA	0	3.65702	0.90856	0	0.954094	0	Scp2
ENSMUST00000030348	2.24192	0.915149	1.50653	0.607456	0.543548	NA	2.26558	4.87603	1.81712	1.02013	0	3.47263	Magoh
ENSMUST00000030361	3.36652	-0.409863	1.1686	-0.350731	0.72579	NA	4.53116	2.43802	1.81712	2.04026	3.81638	5.5562	Tmem59
ENSMUST00000030367	0.874405	-0.835884	2.49022	-0.335668	0.737122	NA	0	0	1.81712	2.04026	0	1.38905	Ssbp3
ENSMUST00000030372	1.04923	1.13174	2.33627	0.484423	0.628085	NA	0	2.43802	1.81712	2.04026	0	0	Col9a2
ENSMUST00000030376	2.22281	-2.51317	1.76044	-1.42758	0.153413	NA	0	0	1.81712	5.10065	5.72456	0.694526	Kcnq4
ENSMUST00000030384	1.08445	-0.22604	2.14874	-0.105196	0.91622	NA	1.13279	0	1.81712	0	2.86228	0.694526	Edn2
ENSMUST00000030398	2.49733	-1.30037	1.42018	-0.915635	0.359858	NA	2.26558	1.21901	0.90856	4.08052	0.954094	5.5562	Slc2a1
ENSMUST00000030446	1.88273	-0.0782918	1.75284	-0.0446658	0.964374	NA	4.53116	0	0.90856	2.04026	3.81638	0	Urod
ENSMUST00000030452	4.32448	1.08898	1.04947	1.03765	0.299435	NA	5.66395	8.53306	3.63424	2.04026	1.90819	4.16715	Ccdc163
ENSMUST00000030455	0.661674	1.67067	2.78778	0.599281	0.548985	NA	1.13279	0	1.81712	1.02013	0	0	Akr1a1
ENSMUST00000030457	3.12815	-2.34834	1.38221	-1.69898	0.0893232	NA	1.13279	0	1.81712	7.14091	3.81638	4.86168	Nasp
ENSMUST00000030474	3.23896	-1.29243	1.25402	-1.03062	0.302717	NA	1.13279	3.65702	0.90856	7.14091	3.81638	2.7781	Nsun4
ENSMUST00000030491	3.01144	2.21411	1.37849	1.60619	0.108233	NA	2.26558	7.31405	5.45136	0	0.954094	2.08358	Cmpk1
ENSMUST00000030501	2.0159	0.596073	1.48515	0.401356	0.688158	NA	3.39837	1.21901	2.72568	1.02013	0.954094	2.7781	Ebna1bp2
ENSMUST00000030508	0.318031	-1.66737	4.02977	-0.413763	0.679048	NA	0	0	0	0	1.90819	0
ENSMUST00000030518	1.33266	2.09071	2.04339	1.02316	0.306234	NA	1.13279	3.65702	1.81712	0	0	1.38905	Capzb
ENSMUST00000030526	3.8865	-1.27048	1.21642	-1.04444	0.296283	NA	0	6.09504	0.90856	4.08052	6.67866	5.5562	Pla2g2f
ENSMUST00000030536	0.698864	-1.36729	2.96069	-0.461814	0.644215	NA	1.13279	0	0	3.06039	0	0
ENSMUST00000030539	4.14022	2.59983	1.20557	2.15652	0.0310427	NA	4.53116	4.87603	11.8113	1.02013	1.90819	0.694526	Kif17
ENSMUST00000030551	2.0393	1.37023	1.49569	0.916123	0.359602	NA	3.39837	3.65702	1.81712	1.02013	0.954094	1.38905	Alpl
ENSMUST00000030555	2.20289	-2.41257	1.64779	-1.46413	0.143159	NA	1.13279	0	0.90856	5.10065	1.90819	4.16715	Gm12582
ENSMUST00000030556	3.15192	-2.15659	1.42758	-1.51066	0.130874	NA	1.13279	2.43802	0	9.18118	4.77047	1.38905	Ptpn12
ENSMUST00000030578	0.817272	-0.44318	2.59949	-0.170487	0.864627	NA	1.13279	0	0.90856	0	2.86228	0	Ptp4a2
ENSMUST00000030586	0.746561	3.19857	2.62221	1.2198	0.222542	NA	1.13279	2.43802	0.90856	0	0	0
ENSMUST00000030606	1.65322	0.825992	1.62723	0.507607	0.611729	NA	1.13279	2.43802	2.72568	1.02013	1.90819	0.694526	Rcan3
ENSMUST00000030613	0.914209	2.25402	2.69754	0.835583	0.40339	NA	4.53116	0	0	0	0.954094	0
ENSMUST00000030626	0.318031	-1.66737	4.02977	-0.413763	0.679048	NA	0	0	0	0	1.90819	0	Tmem50a
ENSMUST00000030627	2.72427	-1.05845	1.29507	-0.81729	0.413763	NA	2.26558	1.21901	1.81712	3.06039	3.81638	4.16715	Rhd
ENSMUST00000030628	1.18586	2.6661	2.49004	1.07071	0.284302	NA	0	6.09504	0	1.02013	0	0	Maco1
ENSMUST00000030636	1.00018	0.367891	2.37828	0.154688	0.877067	NA	3.39837	0	0	0	1.90819	0.694526
ENSMUST00000030637	1.06169	2.61858	2.38211	1.09927	0.271652	NA	1.13279	0	4.5428	0	0	0.694526	Ncdn
ENSMUST00000030643	2.55143	1.91919	1.465	1.31003	0.190186	NA	6.79674	3.65702	1.81712	0	0.954094	2.08358	Extl1
ENSMUST00000030660	2.24673	-0.552855	1.46659	-0.376965	0.7062	NA	0	3.65702	1.81712	3.06039	2.86228	2.08358	Trappc3
ENSMUST00000030665	1.74572	0.153187	1.829	0.0837544	0.933252	NA	4.53116	0	0.90856	4.08052	0.954094	0	Nudc
ENSMUST00000030676	1.92627	-0.586767	1.7066	-0.343822	0.73098	NA	2.26558	2.43802	0	0	4.77047	2.08358	Grik3
ENSMUST00000030687	2.6499	-1.53273	1.42108	-1.07857	0.280779	NA	0	1.21901	2.72568	5.10065	4.77047	2.08358	Rspo1
ENSMUST00000030690	0.362184	0.297401	3.78278	0.0786196	0.937335	NA	0	1.21901	0	0	0.954094	0	Cdca8
ENSMUST00000030702	2.89015	0.229668	1.43578	0.159961	0.872912	NA	0	4.87603	4.5428	3.06039	0	4.86168	Ppp1r8
ENSMUST00000030709	1.3396	2.96643	2.06196	1.43864	0.150252	NA	3.39837	1.21901	2.72568	0	0	0.694526	Smpdl3b
ENSMUST00000030743	1.74144	0.233503	1.70075	0.137294	0.890798	NA	2.26558	2.43802	0.90856	1.02013	3.81638	0	Srsf4
ENSMUST00000030747	0.825752	-0.187862	2.41457	-0.0778035	0.937984	NA	1.13279	1.21901	0	0	1.90819	0.694526	Casp9
ENSMUST00000030751	0.909802	0.849501	2.34585	0.36213	0.717255	NA	2.26558	1.21901	0	1.02013	0.954094	0	Plekhm2
ENSMUST00000030765	4.68104	0.882776	1.10485	0.799003	0.424288	NA	2.26558	4.87603	10.9027	1.02013	7.63275	1.38905	Padi2
ENSMUST00000030771	0.528842	-0.776605	3.28049	-0.236735	0.812863	NA	1.13279	0	0	2.04026	0	0	Dnajc2
ENSMUST00000030782	1.44669	0.491459	1.79571	0.273685	0.784327	NA	2.26558	0	2.72568	2.04026	0.954094	0.694526	Hes2
ENSMUST00000030787	0.302853	1.9429	4.05892	0.478675	0.63217	NA	0	0	1.81712	0	0	0	Rheb
ENSMUST00000030799	2.01641	4.63841	1.93413	2.3982	0.0164761	NA	9.06232	1.21901	1.81712	0	0	0	Tmub1
ENSMUST00000030803	4.2351	-0.136143	1.0252	-0.132797	0.894354	NA	4.53116	4.87603	2.72568	4.08052	5.72456	3.47263	Uts2
ENSMUST00000030806	5.55096	-0.0917996	0.899825	-0.102019	0.918741	NA	3.39837	7.31405	5.45136	6.12078	4.77047	6.25073	Kif1b
ENSMUST00000030814	0.529024	2.71577	3.20961	0.846138	0.397476	NA	2.26558	0	0.90856	0	0	0	Cdk5
ENSMUST00000030815	0.735373	0.301719	2.7098	0.111344	0.911344	NA	0	2.43802	0	1.02013	0.954094	0	Cort
ENSMUST00000030816	2.4999	1.63727	1.41108	1.16029	0.245929	NA	3.39837	6.09504	1.81712	2.04026	0.954094	0.694526	Dffa
ENSMUST00000030834	1.64838	1.59881	1.85484	0.861968	0.388705	NA	5.66395	0	1.81712	1.02013	0	1.38905
ENSMUST00000030897	0.340044	-1.7522	4.02287	-0.435559	0.663156	NA	0	0	0	2.04026	0	0	Megf6
ENSMUST00000030920	0.488944	-0.5658	3.13175	-0.180666	0.85663	NA	0	1.21901	0	1.02013	0	0.694526	Rbm33
ENSMUST00000030937	0.340044	-1.7522	4.02287	-0.435559	0.663156	NA	0	0	0	2.04026	0	0
ENSMUST00000030942	0.45428	2.52164	3.71856	0.678124	0.497693	NA	0	0	2.72568	0	0	0
ENSMUST00000030947	5.52479	-0.331172	0.960422	-0.344819	0.730231	NA	6.79674	6.09504	1.81712	6.12078	9.54094	2.7781	Mxra8
ENSMUST00000030951	1.04912	-1.0226	2.37889	-0.429864	0.667295	NA	0	1.21901	0.90856	0	0	4.16715	Ttll10
ENSMUST00000030964	4.06181	-0.289961	1.15079	-0.251967	0.801067	NA	7.92953	1.21901	1.81712	2.04026	8.58685	2.7781	Cd38
ENSMUST00000030971	4.72396	-0.184955	1.07235	-0.172476	0.863064	NA	2.26558	8.53306	2.72568	1.02013	4.77047	9.02883	Adgra3
ENSMUST00000030984	0.231509	-1.29121	4.06281	-0.317811	0.750628	NA	0	0	0	0	0	1.38905
ENSMUST00000031003	2.37026	-0.228195	1.38382	-0.164901	0.869022	NA	1.13279	3.65702	1.81712	1.02013	3.81638	2.7781	Ppp2r2c
ENSMUST00000031004	2.94996	2.51354	1.39272	1.80477	0.0711105	NA	2.26558	7.31405	5.45136	1.02013	0.954094	0.694526	Crmp1
ENSMUST00000031018	4.04069	-0.590405	1.18184	-0.499566	0.617381	NA	2.26558	0	7.26848	2.04026	5.72456	6.94526	Rbks
ENSMUST00000031045	0.592801	-2.57622	3.07131	-0.838802	0.401581	NA	0	0	0	0	2.86228	0.694526	Yipf7
ENSMUST00000031055	1.34324	2.15597	2.1959	0.981815	0.326191	NA	0	1.21901	5.45136	0	0	1.38905	Emilin1
ENSMUST00000031058	0.267181	0.297402	4.08047	0.0728841	0.941898	NA	0	0	0.90856	0	0	0.694526
ENSMUST00000031061	0.231509	-1.29121	4.06281	-0.317811	0.750628	NA	0	0	0	0	0	1.38905	Dhx15
ENSMUST00000031077	0.741755	-0.24039	2.4996	-0.0961712	0.923385	NA	1.13279	0	0.90856	1.02013	0	1.38905	Zcchc4
ENSMUST00000031078	0.231509	-1.29121	4.06281	-0.317811	0.750628	NA	0	0	0	0	0	1.38905	Fam166c
ENSMUST00000031081	0.593692	-1.04433	2.88978	-0.361389	0.717809	NA	0	1.21901	0	0	0.954094	1.38905	Pi4k2b
ENSMUST00000031082	0.54954	-2.47883	3.13404	-0.790939	0.428979	NA	0	0	0	0	1.90819	1.38905	Pi4k2b
ENSMUST00000031090	1.60953	1.56459	2.04813	0.763912	0.444919	NA	0	7.31405	0	0	0.954094	1.38905	Sel1l3
ENSMUST00000031096	4.51475	-1.12178	1.05955	-1.05873	0.289722	NA	3.39837	2.43802	2.72568	2.04026	9.54094	6.94526	Klb
ENSMUST00000031101	0.701857	-0.0430377	2.72579	-0.0157891	0.987403	NA	0	1.21901	0.90856	0	0	2.08358	Lias
ENSMUST00000031106	1.65763	1.5023	1.72849	0.869138	0.384771	NA	3.39837	1.21901	2.72568	0	1.90819	0.694526	Rhoh
ENSMUST00000031108	0.304553	0.297402	4.04158	0.0735855	0.94134	NA	1.13279	0	0	0	0	0.694526
ENSMUST00000031117	0.37319	0.297401	3.74059	0.0795064	0.93663	NA	0	1.21901	0	1.02013	0	0	Gnpda2
ENSMUST00000031122	3.33702	-0.899477	1.2073	-0.745033	0.456252	NA	1.13279	1.21901	4.5428	3.06039	3.81638	6.25073	Gabrb1
ENSMUST00000031158	0.285776	-1.52701	4.04209	-0.377777	0.705596	NA	0	0	0	1.02013	0	0.694526
ENSMUST00000031160	0.455798	-2.19032	3.39665	-0.644847	0.519026	NA	0	0	0	2.04026	0	0.694526
ENSMUST00000031175	0.231509	-1.29121	4.06281	-0.317811	0.750628	NA	0	0	0	0	0	1.38905
ENSMUST00000031195	0.477047	-2.25463	3.65591	-0.616709	0.537427	NA	0	0	0	0	2.86228	0	Ugt2a3
ENSMUST00000031222	0.657705	-1.4216	2.77697	-0.511924	0.608704	NA	0	0	0.90856	0	0.954094	2.08358	Enam
ENSMUST00000031226	0.668711	-1.44574	2.76257	-0.523331	0.600744	NA	0	0	0.90856	1.02013	0	2.08358	Ambn
ENSMUST00000031246	0.480464	-0.734714	3.14893	-0.233321	0.815512	NA	0	0	0.90856	1.02013	0.954094	0
ENSMUST00000031251	0.488944	-0.5658	3.13175	-0.180666	0.85663	NA	0	1.21901	0	1.02013	0	0.694526	Hsd17b11
ENSMUST00000031254	0.738338	-1.52096	2.65689	-0.572458	0.567012	NA	1.13279	0	0	0	1.90819	1.38905
ENSMUST00000031262	2.26101	0.650451	1.62013	0.401482	0.688066	NA	2.26558	6.09504	0	0	3.81638	1.38905	Coq2
ENSMUST00000031263	3.31577	2.38775	1.45807	1.63761	0.101503	NA	6.79674	0	9.99416	1.02013	0	2.08358	Slc10a6
ENSMUST00000031274	2.99349	-1.19432	1.32811	-0.899264	0.368512	NA	2.26558	2.43802	0.90856	3.06039	0.954094	8.33431	4930522N08Rik
ENSMUST00000031311	3.53345	-0.482884	1.25628	-0.384377	0.700699	NA	3.39837	3.65702	1.81712	8.16104	0	4.16715	Dck
ENSMUST00000031324	2.59202	-0.357207	1.34598	-0.265388	0.790711	NA	1.13279	4.87603	0.90856	2.04026	3.81638	2.7781	Ereg
ENSMUST00000031333	0.231509	-1.29121	4.06281	-0.317811	0.750628	NA	0	0	0	0	0	1.38905
ENSMUST00000031334	3.80734	1.73759	1.15868	1.49963	0.133711	NA	9.06232	4.87603	3.63424	1.02013	2.86228	1.38905	Eif2b1
ENSMUST00000031344	3.99738	0.486722	1.09078	0.446213	0.655443	NA	6.79674	3.65702	3.63424	4.08052	0.954094	4.86168	Mphosph9
ENSMUST00000031355	0.406336	2.30922	3.90605	0.591191	0.554393	NA	0	2.43802	0	0	0	0
ENSMUST00000031377	2.82699	2.37199	1.52418	1.55624	0.119651	NA	2.26558	3.65702	8.17704	0	2.86228	0	Scarb2
ENSMUST00000031390	4.23846	-0.124427	1.04092	-0.119536	0.904851	NA	3.39837	6.09504	2.72568	3.06039	6.67866	3.47263	Mmp17
ENSMUST00000031398	1.01014	-0.622295	2.23657	-0.278236	0.780831	NA	0	2.43802	0	1.02013	1.90819	0.694526	Hpd
ENSMUST00000031399	5.21394	-0.00112365	0.939844	-0.00119557	0.999046	NA	5.66395	3.65702	6.35992	5.10065	2.86228	7.63978	Psph
ENSMUST00000031411	0.609504	2.89514	3.32533	0.870633	0.383955	NA	0	3.65702	0	0	0	0	Aldh2
ENSMUST00000031414	0.302853	1.9429	4.05892	0.478675	0.63217	NA	0	0	1.81712	0	0	0
ENSMUST00000031421	0.463017	-2.25479	3.68553	-0.611795	0.540673	NA	0	0	0	0	0	2.7781
ENSMUST00000031426	0.658075	-2.70991	2.94377	-0.920555	0.357283	NA	0	0	0	2.04026	1.90819	0
ENSMUST00000031429	2.14454	0.968076	1.65905	0.583514	0.559548	NA	5.66395	1.21901	1.81712	0	0	4.16715	P2rx4
ENSMUST00000031435	0.318031	-1.66737	4.02977	-0.413763	0.679048	NA	0	0	0	0	1.90819	0
ENSMUST00000031446	0.668711	-1.44574	2.76257	-0.523331	0.600744	NA	0	0	0.90856	1.02013	0	2.08358	Tmem132b
ENSMUST00000031481	0.869904	1.05423	2.38567	0.441899	0.658563	NA	1.13279	2.43802	0	0	0.954094	0.694526	Pus1
ENSMUST00000031508	5.73689	0.0517093	0.886768	0.0583121	0.9535	NA	5.66395	7.31405	4.5428	5.10065	7.63275	4.16715	Triap1
ENSMUST00000031513	0.506021	2.65898	3.26163	0.815231	0.41494	NA	0	1.21901	1.81712	0	0	0	Srsf9
ENSMUST00000031519	1.36915	1.09078	1.85866	0.586864	0.557295	NA	2.26558	2.43802	0.90856	0	1.90819	0.694526	Cabp1
ENSMUST00000031521	0.510065	-2.3403	3.56404	-0.656643	0.51141	NA	0	0	0	3.06039	0	0
ENSMUST00000031535	1.27643	-1.36075	1.98849	-0.684315	0.493777	NA	0	1.21901	0.90856	1.02013	3.81638	0.694526	Hnf1a
ENSMUST00000031536	1.74872	0.635092	1.57761	0.402567	0.687267	NA	3.39837	1.21901	1.81712	1.02013	0.954094	2.08358	Mrm2
ENSMUST00000031538	2.86089	-0.452304	1.2618	-0.358458	0.72	NA	2.26558	1.21901	3.63424	5.10065	2.86228	2.08358	2210016L21Rik
ENSMUST00000031547	4.08599	-0.60123	1.08654	-0.553345	0.580027	NA	2.26558	4.87603	2.72568	5.10065	1.90819	7.63978	4930519G04Rik
ENSMUST00000031549	1.24735	1.98827	2.42751	0.819058	0.412753	NA	0	6.09504	0	0	0	1.38905
ENSMUST00000031554	1.72453	-3.04582	1.92396	-1.5831	0.113398	NA	0	0	0.90856	1.02013	2.86228	5.5562	Tmem168
ENSMUST00000031555	0.35882	0.297401	3.79607	0.0783444	0.937554	NA	1.13279	0	0	1.02013	0	0	Lfng
ENSMUST00000031556	3.7245	0.54633	1.1369	0.480543	0.630841	NA	1.13279	4.87603	7.26848	2.04026	2.86228	4.16715	Tmem106b
ENSMUST00000031560	1.78421	-0.00575766	1.55595	-0.00370042	0.997047	NA	2.26558	1.21901	1.81712	3.06039	0.954094	1.38905	Mmab
ENSMUST00000031574	5.31789	-0.304941	0.940236	-0.324324	0.745693	NA	7.92953	3.65702	2.72568	5.10065	7.63275	4.86168	Spdye4b
ENSMUST00000031587	0.524616	1.17399	3.05781	0.383933	0.701028	NA	0	1.21901	0.90856	1.02013	0	0	Ung
ENSMUST00000031591	0.543212	-0.775783	3.24926	-0.238757	0.811294	NA	0	1.21901	0	2.04026	0	0
ENSMUST00000031607	2.78454	1.4681	1.39969	1.04887	0.294237	NA	3.39837	2.43802	6.35992	0	3.81638	0.694526	Dtx1
ENSMUST00000031632	0.940698	1.49536	2.43812	0.613324	0.539662	NA	0	2.43802	1.81712	0	0	1.38905	Zkscan14
ENSMUST00000031651	4.20091	-0.815728	1.10606	-0.737508	0.460813	NA	1.13279	2.43802	5.45136	2.04026	8.58685	5.5562	Pan3
ENSMUST00000031653	4.54425	1.16709	1.1919	0.979185	0.327489	NA	6.79674	0	11.8113	5.10065	2.86228	0.694526	Flt1
ENSMUST00000031654	0.472875	0.995329	3.4182	0.291185	0.77091	NA	0	0	1.81712	1.02013	0	0	Pomp
ENSMUST00000031673	0.318031	-1.66737	4.02977	-0.413763	0.679048	NA	0	0	0	0	1.90819	0
ENSMUST00000031680	1.1677	2.68533	2.17556	1.23431	0.217086	NA	1.13279	1.21901	3.63424	1.02013	0	0	Ing3
ENSMUST00000031691	4.31281	1.55529	1.06781	1.45653	0.145245	NA	7.92953	6.09504	5.45136	1.02013	1.90819	3.47263	Hyal4
ENSMUST00000031692	0.49147	-0.77878	3.36821	-0.231215	0.817148	NA	0	0	0.90856	2.04026	0	0
ENSMUST00000031694	1.43189	1.13047	1.85721	0.608693	0.542728	NA	2.26558	3.65702	0	1.02013	0.954094	0.694526	Lmod2
ENSMUST00000031695	4.25735	0.515923	1.06534	0.48428	0.628187	NA	6.79674	3.65702	4.5428	6.12078	0.954094	3.47263	Wasl
ENSMUST00000031697	0.72905	0.758697	2.69415	0.281609	0.778243	NA	0	0	2.72568	0	0.954094	0.694526	Cul1
ENSMUST00000031726	0.231509	-1.29121	4.06281	-0.317811	0.750628	NA	0	0	0	0	0	1.38905	Gnb2
ENSMUST00000031731	5.90291	-0.615047	1.01626	-0.605203	0.545044	NA	6.79674	7.31405	0	10.2013	7.63275	3.47263	Pcolce
ENSMUST00000031732	0.895655	-0.883349	2.49379	-0.35422	0.723174	NA	0	0	1.81712	0	2.86228	0.694526	Fbxo24
ENSMUST00000031739	5.51598	0.978209	0.919691	1.06363	0.287497	NA	10.1951	7.31405	4.5428	3.06039	3.81638	4.16715	Ppp1r35
ENSMUST00000031788	1.76285	-0.985947	1.78796	-0.551437	0.581334	NA	0	3.65702	0	1.02013	3.81638	2.08358	Hibadh
ENSMUST00000031798	3.87286	-0.524792	1.1333	-0.463065	0.643318	NA	5.66395	1.21901	2.72568	4.08052	1.90819	7.63978	Ssmem1
ENSMUST00000031806	3.98922	0.0294365	1.07159	0.02747	0.978085	NA	5.66395	3.65702	2.72568	4.08052	5.72456	2.08358	Cpa1
ENSMUST00000031840	3.19055	-0.412288	1.2577	-0.327812	0.743054	NA	4.53116	0	3.63424	2.04026	4.77047	4.16715	Gpnmb
ENSMUST00000031853	2.63911	-1.3451	1.49626	-0.89898	0.368663	NA	4.53116	0	0	3.06039	4.77047	3.47263	Npvf
ENSMUST00000031863	0.382935	-0.336617	3.69733	-0.0910433	0.927458	NA	0	0	0.90856	0	0	1.38905	1700111E14Rik
ENSMUST00000031868	4.83085	0.0868653	1.00245	0.0866527	0.930948	NA	2.26558	7.31405	5.45136	5.10065	1.90819	6.94526	Slc13a4
ENSMUST00000031879	0.310442	0.297402	4.01182	0.0741313	0.940906	NA	0	0	0.90856	0	0.954094	0
ENSMUST00000031895	0.701857	-0.0430377	2.72579	-0.0157891	0.987403	NA	0	1.21901	0.90856	0	0	2.08358	Casp2
ENSMUST00000031899	5.08412	-2.67649	1.14907	-2.32927	0.0198449	NA	0	1.21901	2.72568	12.2416	6.67866	7.63978	Kel
ENSMUST00000031913	0.853284	0.477525	2.50331	0.190758	0.848715	NA	0	1.21901	1.81712	0	0	2.08358
ENSMUST00000031931	1.02068	3.6705	2.49427	1.47158	0.141136	NA	3.39837	0	2.72568	0	0	0	Prss3b
ENSMUST00000031935	0.936262	-2.00183	2.32903	-0.85951	0.390059	NA	0	0	0.90856	3.06039	0.954094	0.694526	Prss59
ENSMUST00000031937	0.474574	-0.565768	3.1635	-0.178842	0.858061	NA	1.13279	0	0	1.02013	0	0.694526	Moxd2
ENSMUST00000031971	0.570034	1.57113	3.17005	0.495618	0.620164	NA	0	0	2.72568	0	0	0.694526
ENSMUST00000031977	1.88873	0.6224	1.752	0.355251	0.722401	NA	5.66395	1.21901	0	3.06039	0	1.38905	Agk
ENSMUST00000031984	0.8131	2.06126	2.59287	0.794973	0.426629	NA	1.13279	0	2.72568	1.02013	0	0	Smarcad1
ENSMUST00000031985	4.68483	0.771805	1.09654	0.703855	0.481523	NA	4.53116	1.21901	11.8113	6.12078	0.954094	3.47263	Mkrn1
ENSMUST00000031986	1.96514	1.14273	1.64617	0.694176	0.487572	NA	5.66395	2.43802	0	2.04026	0.954094	0.694526	Rab19
ENSMUST00000032057	0.340044	-1.7522	4.02287	-0.435559	0.663156	NA	0	0	0	2.04026	0	0
ENSMUST00000032065	3.07564	0.858828	1.27685	0.672614	0.501193	NA	1.13279	6.09504	4.5428	4.08052	1.90819	0.694526	Pcyox1
ENSMUST00000032066	3.23521	1.42667	1.28677	1.10873	0.267547	NA	10.1951	1.21901	2.72568	1.02013	2.86228	1.38905	Tgfa
ENSMUST00000032071	3.47277	0.398211	1.17593	0.338635	0.734885	NA	6.79674	2.43802	2.72568	3.06039	0.954094	4.86168	Dusp11
ENSMUST00000032073	1.32329	0.879648	2.00331	0.439097	0.660592	NA	1.13279	1.21901	2.72568	0	2.86228	0	Nat8
ENSMUST00000032078	2.80905	0.427003	1.28614	0.332003	0.739887	NA	5.66395	1.21901	2.72568	2.04026	3.81638	1.38905	Cct7
ENSMUST00000032106	0.745119	-0.175904	2.49445	-0.0705182	0.943781	NA	0	1.21901	0.90856	0	0.954094	1.38905	1700003E16Rik
ENSMUST00000032107	3.10516	1.09777	1.27174	0.863206	0.388024	NA	4.53116	3.65702	4.5428	0	3.81638	2.08358	Kbtbd8
ENSMUST00000032133	3.16755	-0.428359	1.20746	-0.354759	0.72277	NA	2.26558	1.21901	4.5428	2.04026	4.77047	4.16715	Gp9
ENSMUST00000032151	0.231509	-1.29121	4.06281	-0.317811	0.750628	NA	0	0	0	0	0	1.38905
ENSMUST00000032152	0.51361	1.17398	3.07947	0.381228	0.703034	NA	0	1.21901	0.90856	0	0.954094	0
ENSMUST00000032177	1.49301	-1.86005	2.30504	-0.806947	0.419697	NA	0	0	1.81712	7.14091	0	0	Slc41a3
ENSMUST00000032180	1.21825	-2.48329	2.11721	-1.17291	0.240833	NA	0	0	0.90856	1.02013	1.90819	3.47263	Wnt7a
ENSMUST00000032182	1.13795	-0.0313668	2.24116	-0.0139958	0.988833	NA	3.39837	0	0	2.04026	0	1.38905	Xpc
ENSMUST00000032183	2.57838	0.878946	1.44111	0.60991	0.541922	NA	4.53116	3.65702	1.81712	0	4.77047	0.694526	Tmem43
ENSMUST00000032191	1.39308	-0.617818	1.82819	-0.33794	0.735408	NA	0	2.43802	0.90856	1.02013	1.90819	2.08358	Sumf1
ENSMUST00000032194	0.576358	1.33508	3.18065	0.419751	0.674667	NA	0	2.43802	0	1.02013	0	0	Bhlhe40
ENSMUST00000032200	0.377597	2.21781	4.02186	0.55144	0.581332	NA	2.26558	0	0	0	0	0
ENSMUST00000032201	0.231509	-1.29121	4.06281	-0.317811	0.750628	NA	0	0	0	0	0	1.38905
ENSMUST00000032207	0.390524	-1.99539	3.59882	-0.554457	0.579266	NA	0	0	0	0	0.954094	1.38905	Klrg1
ENSMUST00000032216	0.831877	3.37989	2.68583	1.25842	0.208242	NA	2.26558	0	2.72568	0	0	0	Ptms
ENSMUST00000032217	0.879211	2.17383	2.51408	0.864664	0.387223	NA	0	2.43802	1.81712	1.02013	0	0	Lag3
ENSMUST00000032222	0.488944	-0.5658	3.13175	-0.180666	0.85663	NA	0	1.21901	0	1.02013	0	0.694526	Tmcc1
ENSMUST00000032248	0.27477	-1.47986	4.0465	-0.365714	0.714579	NA	0	0	0	0	0.954094	0.694526
ENSMUST00000032260	0.840614	-0.368348	2.73198	-0.134828	0.892748	NA	2.26558	0	0	0	0	2.7781	Clec2d
ENSMUST00000032263	0.285776	-1.52701	4.04209	-0.377777	0.705596	NA	0	0	0	1.02013	0	0.694526	Tmem52b
ENSMUST00000032265	0.846873	-1.74009	2.55218	-0.681807	0.495361	NA	1.13279	0	0	2.04026	1.90819	0	Olr1
ENSMUST00000032272	2.52077	2.14944	1.49713	1.43571	0.151085	NA	3.39837	2.43802	6.35992	1.02013	1.90819	0	Adipor2
ENSMUST00000032317	0.614444	-1.30765	3.07839	-0.424784	0.670994	NA	0	0	0.90856	0	0	2.7781	Tas2r103
ENSMUST00000032335	4.93096	0.490947	0.963199	0.509704	0.610259	NA	9.06232	3.65702	4.5428	4.08052	4.77047	3.47263	Atf7ip
ENSMUST00000032343	4.40457	-0.505624	1.00686	-0.502177	0.615543	NA	3.39837	4.87603	2.72568	5.10065	4.77047	5.5562	Erp27
ENSMUST00000032347	0.560546	-2.50395	2.88511	-0.867888	0.385456	NA	0	0	0	1.02013	0.954094	1.38905	Rerg
ENSMUST00000032370	4.02258	-0.207141	1.10028	-0.188261	0.850672	NA	4.53116	1.21901	5.45136	4.08052	1.90819	6.94526	Recql
ENSMUST00000032371	0.461869	0.994502	3.4476	0.288463	0.772993	NA	0	0	1.81712	0	0.954094	0	Gys2
ENSMUST00000032372	3.22399	1.28065	1.32671	0.965283	0.334403	NA	5.66395	2.43802	5.45136	1.02013	4.77047	0	Golt1b
ENSMUST00000032376	1.09376	0.402055	2.29537	0.175159	0.860955	NA	0	0	3.63424	1.02013	1.90819	0	Lmcd1
ENSMUST00000032386	2.68854	1.45835	1.37781	1.05846	0.289847	NA	1.13279	2.43802	8.17704	2.04026	0.954094	1.38905	Bhlhe41
ENSMUST00000032396	3.95821	1.4779	1.17569	1.25704	0.208738	NA	7.92953	1.21901	8.17704	4.08052	0.954094	1.38905	Irag2
ENSMUST00000032410	0.651815	-1.30977	3.01446	-0.434494	0.663929	NA	1.13279	0	0	0	0	2.7781	Tada3
ENSMUST00000032419	2.71301	0.0893861	1.26518	0.0706508	0.943676	NA	2.26558	2.43802	3.63424	2.04026	3.81638	2.08358	Cmas
ENSMUST00000032421	1.59071	3.24917	2.08011	1.56201	0.118284	NA	3.39837	0	5.45136	0	0	0.694526	St8sia1
ENSMUST00000032422	0.377597	2.21781	4.02186	0.55144	0.581332	NA	2.26558	0	0	0	0	0
ENSMUST00000032468	0.340044	-1.7522	4.02287	-0.435559	0.663156	NA	0	0	0	2.04026	0	0	Efcab12
ENSMUST00000032469	0.882176	0.324935	2.30998	0.140666	0.888134	NA	1.13279	0	1.81712	0	0.954094	1.38905	Mbd4
ENSMUST00000032471	0.692112	0.461144	2.76713	0.166651	0.867645	NA	0	2.43802	0	1.02013	0	0.694526	Rho
ENSMUST00000032472	0.391966	2.26108	3.62965	0.622948	0.533318	NA	1.13279	1.21901	0	0	0	0	Klrb1b
ENSMUST00000032473	0.566395	2.8031	3.41704	0.82033	0.412028	NA	3.39837	0	0	0	0	0
ENSMUST00000032485	0.49147	-0.77878	3.36821	-0.231215	0.817148	NA	0	0	0.90856	2.04026	0	0	Mrpl51
ENSMUST00000032487	0.787489	-1.70411	2.83859	-0.600336	0.548282	NA	0	0	0.90856	0	3.81638	0	Vamp1
ENSMUST00000032491	0.875794	0.830494	2.51611	0.330071	0.741346	NA	0	2.43802	0.90856	0	1.90819	0	Tnfrsf1a
ENSMUST00000032492	5.43488	-1.24961	0.945438	-1.32173	0.186259	NA	4.53116	2.43802	2.72568	8.16104	5.72456	9.02883	Cd9
ENSMUST00000032501	1.11173	3.80535	2.46485	1.54385	0.122626	NA	0	1.21901	5.45136	0	0	0	Tspan11
ENSMUST00000032551	1.68579	-0.538555	1.64905	-0.326584	0.743982	NA	2.26558	0	1.81712	2.04026	1.90819	2.08358	Zik1
ENSMUST00000032585	1.55569	0.991723	1.74057	0.569768	0.568835	NA	1.13279	2.43802	2.72568	0	0.954094	2.08358	Pop4
ENSMUST00000032667	1.61178	1.31115	1.97636	0.663419	0.507063	NA	2.26558	0	4.5428	0	2.86228	0	Siglece
ENSMUST00000032704	2.79345	1.50686	1.31797	1.14332	0.252906	NA	4.53116	6.09504	1.81712	1.02013	1.90819	1.38905	Faap24
ENSMUST00000032710	1.63344	-2.04284	2.01223	-1.01521	0.310005	NA	0	0	1.81712	0	3.81638	4.16715	Slc17a6
ENSMUST00000032715	1.17357	-0.0539384	2.09765	-0.0257138	0.979486	NA	2.26558	1.21901	0	0	2.86228	0.694526	Prmt3
ENSMUST00000032719	0.285776	-1.52701	4.04209	-0.377777	0.705596	NA	0	0	0	1.02013	0	0.694526	Nav3
ENSMUST00000032728	1.41357	1.31419	1.93777	0.678196	0.497647	NA	0	2.43802	3.63424	1.02013	0	1.38905	Tarsl2
ENSMUST00000032735	0.463017	-2.25479	3.68553	-0.611795	0.540673	NA	0	0	0	0	0	2.7781	Mphosph10
ENSMUST00000032738	3.00099	1.16784	1.33487	0.874874	0.381642	NA	9.06232	2.43802	0.90856	2.04026	2.86228	0.694526	Chrna7
ENSMUST00000032754	1.23258	0.631959	2.18887	0.288715	0.7728	NA	3.39837	1.21901	0	0	0	2.7781
ENSMUST00000032768	0.911777	-0.723579	2.3117	-0.313007	0.754275	NA	1.13279	0	0.90856	2.04026	0	1.38905	Nr2f2
ENSMUST00000032774	0.741755	-0.24039	2.4996	-0.0961712	0.923385	NA	1.13279	0	0.90856	1.02013	0	1.38905	Ttc23
ENSMUST00000032775	0.928028	0.631615	2.43728	0.259147	0.795521	NA	2.26558	1.21901	0	0	0	2.08358	Lrrc28
ENSMUST00000032779	0.318031	-1.66737	4.02977	-0.413763	0.679048	NA	0	0	0	0	1.90819	0
ENSMUST00000032802	1.58332	1.34984	1.70349	0.792399	0.428128	NA	2.26558	3.65702	0.90856	1.02013	0.954094	0.694526	Zfp84
ENSMUST00000032824	1.03457	-3.39927	2.49084	-1.36471	0.172345	NA	0	0	0	2.04026	0	4.16715
ENSMUST00000032835	0.899072	0.108571	2.31745	0.0468495	0.962633	NA	0	0	2.72568	1.02013	0.954094	0.694526	Acan
ENSMUST00000032839	5.80154	0.697232	0.880244	0.792089	0.428309	NA	5.66395	8.53306	7.26848	5.10065	4.77047	3.47263	Det1
ENSMUST00000032841	0.751817	-2.91707	2.8216	-1.03384	0.301213	NA	0	0	0	0	3.81638	0.694526	Mrpl46
ENSMUST00000032842	2.17945	-0.888517	1.58701	-0.55987	0.575568	NA	3.39837	1.21901	0	2.04026	5.72456	0.694526	Ccdc90b
ENSMUST00000032844	0.507721	1.29158	3.09034	0.41794	0.675991	NA	1.13279	1.21901	0	0	0	0.694526	Tmem126a
ENSMUST00000032856	1.26999	-2.48385	2.09339	-1.18652	0.235418	NA	0	1.21901	0	1.02013	1.90819	3.47263	Me3
ENSMUST00000032872	2.63048	-1.3645	1.35415	-1.00764	0.313626	NA	1.13279	2.43802	0.90856	3.06039	4.77047	3.47263	1700010L04Rik
ENSMUST00000032898	1.44614	-0.296989	1.89219	-0.156955	0.87528	NA	1.13279	0	2.72568	2.04026	0	2.7781	Ipo5
ENSMUST00000032931	0.680215	-1.28642	2.98591	-0.430832	0.66659	NA	0	1.21901	0	0	2.86228	0
ENSMUST00000032934	5.21631	0.289242	0.975307	0.296565	0.766799	NA	7.92953	4.87603	4.5428	1.02013	6.67866	6.25073	Aldoa
ENSMUST00000032944	0.318031	-1.66737	4.02977	-0.413763	0.679048	NA	0	0	0	0	1.90819	0
ENSMUST00000032956	0.636063	-2.67007	3.27281	-0.815833	0.414595	NA	0	0	0	0	3.81638	0	Sgf29
ENSMUST00000032958	0.347814	0.297401	3.84094	0.0774292	0.938282	NA	1.13279	0	0	0	0.954094	0	Ucp3
ENSMUST00000032974	1.85576	-1.27994	1.60837	-0.795803	0.426147	NA	1.13279	1.21901	0.90856	1.02013	4.77047	2.08358	Atp2a1
ENSMUST00000032981	1.21346	-0.181134	2.221	-0.0815553	0.935	NA	3.39837	0	0	1.02013	2.86228	0	Gm9755
ENSMUST00000032985	0.480464	-0.734714	3.14893	-0.233321	0.815512	NA	0	0	0.90856	1.02013	0.954094	0	Slco2b1
ENSMUST00000032998	0.692112	0.461144	2.76713	0.166651	0.867645	NA	0	2.43802	0	1.02013	0	0.694526	Rps3
ENSMUST00000033009	4.56963	1.11873	1.00023	1.11848	0.263362	NA	5.66395	4.87603	8.17704	3.06039	2.86228	2.7781	Thap12
ENSMUST00000033010	4.14451	0.227123	1.25739	0.18063	0.856658	NA	4.53116	6.09504	2.72568	1.02013	10.495	0	Kdm8
ENSMUST00000033025	0.347263	-1.8428	4.01591	-0.458875	0.646324	NA	0	0	0	0	0	2.08358
ENSMUST00000033030	0.35882	0.297401	3.79607	0.0783444	0.937554	NA	1.13279	0	0	1.02013	0	0	Parva
ENSMUST00000033036	1.96637	1.70822	1.73784	0.982961	0.325627	NA	2.26558	1.21901	5.45136	0	2.86228	0	Dkk3
ENSMUST00000033050	0.472875	0.995329	3.4182	0.291185	0.77091	NA	0	0	1.81712	1.02013	0	0	Lyve1
ENSMUST00000033053	5.52621	-2.00973	1.0756	-1.86848	0.0616957	NA	4.53116	1.21901	0.90856	15.302	2.86228	8.33431	Itgax
ENSMUST00000033054	0.736417	1.83786	2.90345	0.632992	0.526739	NA	3.39837	0	0	1.02013	0	0
ENSMUST00000033081	4.52491	0.0819647	1.012	0.0809926	0.935448	NA	6.79674	3.65702	3.63424	2.04026	4.77047	6.25073	Fbxl19
ENSMUST00000033099	2.69024	1.13493	1.31797	0.861123	0.38917	NA	2.26558	2.43802	6.35992	2.04026	0.954094	2.08358	Fgf21
ENSMUST00000033133	5.40446	2.36998	1.04225	2.2739	0.0229718	NA	3.39837	10.9711	12.7198	2.04026	1.90819	1.38905	Rgs10
ENSMUST00000033149	0.318031	-1.66737	4.02977	-0.413763	0.679048	NA	0	0	0	0	1.90819	0
ENSMUST00000033152	2.29673	1.47375	1.44425	1.02042	0.307528	NA	3.39837	4.87603	1.81712	2.04026	0.954094	0.694526	Chp2
ENSMUST00000033160	5.66334	-1.76024	0.977362	-1.80101	0.0717013	NA	4.53116	2.43802	0.90856	9.18118	8.58685	8.33431	Gga2
ENSMUST00000033163	3.8647	1.06872	1.08538	0.984647	0.324798	NA	4.53116	4.87603	6.35992	2.04026	1.90819	3.47263	Mettl9
ENSMUST00000033166	3.45068	-0.998549	1.26817	-0.787396	0.43105	NA	2.26558	4.87603	0	3.06039	2.86228	7.63978	Mfsd13b
ENSMUST00000033173	0.310442	0.297402	4.01182	0.0741313	0.940906	NA	0	0	0.90856	0	0.954094	0	Polr3e
ENSMUST00000033179	1.0801	-0.372562	2.3045	-0.161667	0.871568	NA	0	0	2.72568	3.06039	0	0.694526	Rrp8
ENSMUST00000033184	2.21691	0.565666	1.4187	0.398721	0.690099	NA	3.39837	3.65702	0.90856	2.04026	1.90819	1.38905	Tpp1
ENSMUST00000033187	2.41687	0.666004	1.5315	0.434872	0.663655	NA	7.92953	0	0.90856	3.06039	1.90819	0.694526	Cnga4
ENSMUST00000033201	0.833576	2.19085	2.57772	0.849919	0.39537	NA	3.39837	0	0.90856	0	0	0.694526	Anks4b
ENSMUST00000033210	1.49254	0.675739	1.78275	0.379043	0.704656	NA	3.39837	1.21901	0.90856	2.04026	0	1.38905	Tmem159
ENSMUST00000033211	4.03219	-1.08055	1.10573	-0.97723	0.328455	NA	4.53116	2.43802	0.90856	4.08052	6.67866	5.5562	Trim30d
ENSMUST00000033290	1.1871	-0.268963	2.07477	-0.129635	0.896855	NA	2.26558	0	0.90856	2.04026	1.90819	0	Dhx32
ENSMUST00000033313	2.29005	-0.206776	1.42589	-0.145015	0.884699	NA	1.13279	2.43802	2.72568	5.10065	0.954094	1.38905	Atp6ap2
ENSMUST00000033325	4.93103	0.617194	1.00946	0.611413	0.540926	NA	10.1951	6.09504	1.81712	3.06039	2.86228	5.5562	Swap70
ENSMUST00000033380	0.382935	-0.336617	3.69733	-0.0910433	0.927458	NA	0	0	0.90856	0	0	1.38905	Cdk16
ENSMUST00000033389	1.33347	0.459698	1.95477	0.235167	0.814079	NA	2.26558	2.43802	0	0	1.90819	1.38905	Fgf15
ENSMUST00000033414	2.90814	-0.153398	1.3423	-0.11428	0.909016	NA	3.39837	1.21901	3.63424	0	5.72456	3.47263	Slc6a14
ENSMUST00000033418	1.14517	-0.102457	2.42367	-0.0422736	0.966281	NA	3.39837	0	0	0	0	3.47263	Il13ra1
ENSMUST00000033427	2.72883	-1.17222	1.44639	-0.810443	0.417686	NA	0	1.21901	3.63424	5.10065	5.72456	0.694526	Sash3
ENSMUST00000033430	0.406336	2.30922	3.90605	0.591191	0.554393	NA	0	2.43802	0	0	0	0
ENSMUST00000033433	1.27763	-2.50509	2.21551	-1.13071	0.258178	NA	1.13279	0	0	3.06039	0	3.47263	Rbmx2
ENSMUST00000033444	0.267181	0.297402	4.08047	0.0728841	0.941898	NA	0	0	0.90856	0	0	0.694526	Stk26
ENSMUST00000033449	0.532205	-0.732075	3.04251	-0.240615	0.809853	NA	0	1.21901	0	1.02013	0.954094	0	Magea14
ENSMUST00000033450	4.54858	1.57442	1.13371	1.38873	0.164914	NA	6.79674	8.53306	5.45136	0	0.954094	5.5562	Gpc4
ENSMUST00000033458	1.2393	0.892661	1.94958	0.457873	0.647043	NA	1.13279	0	3.63424	1.02013	0.954094	0.694526	3830403N18Rik
ENSMUST00000033463	0.717822	3.15271	2.86497	1.10043	0.271144	NA	3.39837	0	0.90856	0	0	0	Slc9a9
ENSMUST00000033489	0.709189	3.13546	2.85604	1.09784	0.272276	NA	0	2.43802	1.81712	0	0	0	Praf2
ENSMUST00000033490	0.302853	1.9429	4.05892	0.478675	0.63217	NA	0	0	1.81712	0	0	0	Ccdc120
ENSMUST00000033495	1.30457	0.73056	2.15396	0.33917	0.734481	NA	1.13279	0	3.63424	3.06039	0	0	Pim2
ENSMUST00000033498	0.45428	2.52164	3.71856	0.678124	0.497693	NA	0	0	2.72568	0	0	0	Timm17b
ENSMUST00000033502	1.37112	0.025085	1.7441	0.0143828	0.988525	NA	1.13279	1.21901	1.81712	1.02013	0.954094	2.08358	Gata1
ENSMUST00000033519	1.29681	-0.233271	2.13148	-0.109441	0.912853	NA	0	3.65702	0	2.04026	0	2.08358	Dynlt3
ENSMUST00000033525	0.267181	0.297402	4.08047	0.0728841	0.941898	NA	0	0	0.90856	0	0	0.694526	4930447F04Rik
ENSMUST00000033532	0.762823	-2.93356	2.59589	-1.13008	0.258443	NA	0	0	0	1.02013	2.86228	0.694526	Aff2
ENSMUST00000033537	0.838733	-1.84011	2.53846	-0.724889	0.46852	NA	0	0	0.90856	2.04026	0	2.08358	4931400O07Rik
ENSMUST00000033540	2.21369	-1.64829	1.58481	-1.04005	0.298315	NA	2.26558	0	0.90856	2.04026	6.67866	1.38905	Vbp1
ENSMUST00000033541	0.304553	0.297402	4.04158	0.0735855	0.94134	NA	1.13279	0	0	0	0	0.694526
ENSMUST00000033549	4.42815	2.16187	1.14488	1.8883	0.058986	NA	4.53116	3.65702	13.6284	1.02013	0.954094	2.7781	Asb12
ENSMUST00000033570	0.470349	1.17392	3.17213	0.370074	0.711327	NA	0	1.21901	0.90856	0	0	0.694526	Igbp1
ENSMUST00000033575	0.493351	1.2522	3.36281	0.372367	0.70962	NA	2.26558	0	0	0	0	0.694526
ENSMUST00000033577	1.53665	-3.94245	2.02402	-1.94783	0.0514353	NA	0	0	0	3.06039	4.77047	1.38905	Pbdc1
ENSMUST00000033578	4.21316	0.828205	1.11386	0.743543	0.457153	NA	3.39837	10.9711	1.81712	5.10065	1.90819	2.08358	Magee1
ENSMUST00000033591	1.13279	3.80386	2.66391	1.42792	0.153315	NA	6.79674	0	0	0	0	0	Itm2a
ENSMUST00000033597	0.304553	0.297402	4.04158	0.0735855	0.94134	NA	1.13279	0	0	0	0	0.694526	Hmgn5
ENSMUST00000033598	1.07242	3.73194	2.2955	1.62577	0.103999	NA	3.39837	1.21901	1.81712	0	0	0	Sh3bgrl
ENSMUST00000033625	4.12805	-0.363859	1.07815	-0.337484	0.735752	NA	1.13279	6.09504	3.63424	3.06039	6.67866	4.16715	4930513O06Rik
ENSMUST00000033643	1.27289	-3.66454	2.17622	-1.6839	0.0922018	NA	0	0	0	4.08052	2.86228	0.694526	Glt28d2
ENSMUST00000033662	3.71684	1.19498	1.1722	1.01944	0.307995	NA	7.92953	1.21901	6.35992	3.06039	0.954094	2.7781	Pdha1
ENSMUST00000033664	1.21242	-1.02661	2.25632	-0.454992	0.649115	NA	0	2.43802	0	1.02013	3.81638	0	Il2rg
ENSMUST00000033671	3.66821	-0.687005	1.14576	-0.599605	0.548769	NA	1.13279	3.65702	3.63424	6.12078	1.90819	5.5562	Rps6ka3
ENSMUST00000033674	0.362184	0.297401	3.78278	0.0786196	0.937335	NA	0	1.21901	0	0	0.954094	0	Itgb1bp2
ENSMUST00000033691	1.84198	4.50606	1.93851	2.32449	0.0200992	NA	6.79674	2.43802	1.81712	0	0	0	Tsx
ENSMUST00000033695	2.9825	0.468784	1.3466	0.348125	0.727747	NA	5.66395	4.87603	0	1.02013	2.86228	3.47263	Abcb7
ENSMUST00000033715	2.89586	0.0400348	1.3325	0.0300449	0.976031	NA	3.39837	3.65702	1.81712	0	5.72456	2.7781	Nsdhl
ENSMUST00000033720	1.21103	-2.44389	2.10603	-1.16042	0.245876	NA	0	0	0.90856	3.06039	1.90819	1.38905
ENSMUST00000033723	1.14572	0.896734	2.26708	0.395546	0.69244	NA	4.53116	0	0	0	0.954094	1.38905	Syap1
ENSMUST00000033737	0.829169	0.918665	2.29322	0.4006	0.688714	NA	1.13279	1.21901	0.90856	1.02013	0	0.694526	Haus7
ENSMUST00000033740	0.604698	-1.07439	2.87256	-0.374019	0.70839	NA	0	1.21901	0	1.02013	0	1.38905	Zfp92
ENSMUST00000033741	0.580765	2.83178	3.10483	0.912057	0.361738	NA	2.26558	1.21901	0	0	0	0
ENSMUST00000033776	0.595134	2.86151	3.07828	0.929581	0.352588	NA	1.13279	2.43802	0	0	0	0	Dkc1
ENSMUST00000033797	1.40363	-2.66637	2.14936	-1.24054	0.214775	NA	1.13279	0	0	0	3.81638	3.47263	Morf4l2
ENSMUST00000033804	1.64848	-0.222467	1.83082	-0.121512	0.903285	NA	2.26558	2.43802	0	1.02013	0	4.16715	Zcchc18
ENSMUST00000033806	0.506021	2.65898	3.26163	0.815231	0.41494	NA	0	1.21901	1.81712	0	0	0	Vsig1
ENSMUST00000033820	2.29972	2.07078	1.55204	1.33423	0.182128	NA	2.26558	2.43802	6.35992	2.04026	0	0.694526	F7
ENSMUST00000033822	4.55508	0.655491	0.999417	0.655873	0.511906	NA	5.66395	3.65702	7.26848	5.10065	2.86228	2.7781	Proz
ENSMUST00000033826	0.329037	-1.70869	3.88407	-0.439924	0.659992	NA	0	0	0	1.02013	0.954094	0
ENSMUST00000033871	0.9637	1.52301	2.28938	0.665249	0.505891	NA	2.26558	1.21901	0.90856	0	0	1.38905	Slc25a15
ENSMUST00000033875	0.976106	-3.28173	2.55784	-1.28301	0.199489	NA	0	0	0	2.04026	3.81638	0	Plpbp
ENSMUST00000033877	3.24098	0.313592	1.37248	0.228486	0.819269	NA	1.13279	1.21901	8.17704	5.10065	3.81638	0	Brf2
ENSMUST00000033880	0.231509	-1.29121	4.06281	-0.317811	0.750628	NA	0	0	0	0	0	1.38905	Eif4ebp1
ENSMUST00000033888	0.455798	-2.19032	3.39665	-0.644847	0.519026	NA	0	0	0	2.04026	0	0.694526	Cd209e
ENSMUST00000033906	2.05305	0.424079	1.53503	0.276267	0.782343	NA	0	2.43802	4.5428	2.04026	1.90819	1.38905	Spaca7b
ENSMUST00000033910	3.64847	0.278258	1.3099	0.212427	0.831774	NA	1.13279	10.9711	0	5.10065	1.90819	2.7781	Leprotl1
ENSMUST00000033913	3.27912	0.284808	1.26752	0.224698	0.822215	NA	2.26558	4.87603	3.63424	6.12078	0	2.7781	Dctn6
ENSMUST00000033915	0.865099	-1.82405	2.37279	-0.768735	0.44205	NA	1.13279	0	0	1.02013	0.954094	2.08358	Gpm6a
ENSMUST00000033934	1.98118	1.66567	1.62664	1.024	0.305838	NA	2.26558	4.87603	1.81712	1.02013	1.90819	0	Mrps31
ENSMUST00000033935	0.709189	3.13546	2.85604	1.09784	0.272276	NA	0	2.43802	1.81712	0	0	0	Smim19
ENSMUST00000033936	1.12861	0.688538	1.99667	0.344843	0.730213	NA	1.13279	1.21901	1.81712	0	1.90819	0.694526	Dkk4
ENSMUST00000033941	1.73324	-0.281092	1.92175	-0.146269	0.883709	NA	0	0	4.5428	2.04026	3.81638	0	Plat
ENSMUST00000033952	2.77431	-0.708057	1.26873	-0.558085	0.576787	NA	1.13279	2.43802	2.72568	3.06039	3.81638	3.47263	Sfrp1
ENSMUST00000033958	0.354595	2.13548	3.77157	0.566205	0.571255	NA	0	1.21901	0.90856	0	0	0
ENSMUST00000033961	0.720453	-1.44715	2.69573	-0.536828	0.591386	NA	0	1.21901	0	1.02013	0	2.08358	Tm2d2
ENSMUST00000033965	1.64545	0.177652	1.71429	0.10363	0.917463	NA	0	2.43802	2.72568	3.06039	0.954094	0.694526	Tenm3
ENSMUST00000033975	4.18359	0.506226	1.03964	0.486924	0.626312	NA	6.79674	2.43802	5.45136	4.08052	2.86228	3.47263	Ddhd2
ENSMUST00000033991	2.08479	-0.919988	1.47998	-0.621623	0.53419	NA	2.26558	1.21901	0.90856	2.04026	1.90819	4.16715	Wrn
ENSMUST00000033995	0.318922	0.297401	3.97047	0.0749034	0.940292	NA	0	1.21901	0	0	0	0.694526	Rbpms
ENSMUST00000034000	4.84488	-0.672627	1.03978	-0.646896	0.517699	NA	7.92953	2.43802	0.90856	8.16104	4.77047	4.86168	Asah1
ENSMUST00000034004	0.934744	0.980338	2.46861	0.397121	0.691278	NA	0	0	3.63424	1.02013	0.954094	0
ENSMUST00000034014	0.835316	-3.08095	2.48199	-1.24132	0.214487	NA	0	0	0	1.02013	1.90819	2.08358
ENSMUST00000034017	0.477047	-2.25463	3.65591	-0.616709	0.537427	NA	0	0	0	0	2.86228	0	Klhl2
ENSMUST00000034021	1.20003	-2.43185	2.11028	-1.15238	0.249163	NA	0	0	0.90856	2.04026	2.86228	1.38905	Galnt7
ENSMUST00000034022	4.37679	2.55776	1.25799	2.03321	0.0420309	NA	12.4607	4.87603	5.45136	0	0	3.47263	Sap30
ENSMUST00000034046	3.39431	2.39636	1.32011	1.81528	0.0694816	NA	9.06232	3.65702	4.5428	1.02013	0	2.08358	Acsl1
ENSMUST00000034048	0.377597	2.21781	4.02186	0.55144	0.581332	NA	2.26558	0	0	0	0	0	Cfap97
ENSMUST00000034049	3.85543	0.467919	1.16772	0.400711	0.688633	NA	9.06232	3.65702	0.90856	2.04026	1.90819	5.5562	Slc25a4
ENSMUST00000034051	0.78838	-0.290958	2.45271	-0.118627	0.905571	NA	0	1.21901	0.90856	0	1.90819	0.694526	Ufsp2
ENSMUST00000034053	0.455798	-2.19032	3.39665	-0.644847	0.519026	NA	0	0	0	2.04026	0	0.694526	Pdlim3
ENSMUST00000034058	0.792054	-3.01399	2.55054	-1.18171	0.237321	NA	0	0	0	1.02013	0.954094	2.7781	Cbr4
ENSMUST00000034060	0.231509	-1.29121	4.06281	-0.317811	0.750628	NA	0	0	0	0	0	1.38905	Sh3rf1
ENSMUST00000034064	3.98898	-0.820802	1.11398	-0.736817	0.461234	NA	5.66395	1.21901	1.81712	6.12078	2.86228	6.25073	F11
ENSMUST00000034066	0.35882	0.297401	3.79607	0.0783444	0.937554	NA	1.13279	0	0	1.02013	0	0	Mfap3l
ENSMUST00000034076	0.302853	1.9429	4.05892	0.478675	0.63217	NA	0	0	1.81712	0	0	0
ENSMUST00000034085	5.74675	0.563363	0.951879	0.591843	0.553956	NA	13.5935	2.43802	4.5428	3.06039	6.67866	4.16715	Brd7
ENSMUST00000034086	0.318031	-1.66737	4.02977	-0.413763	0.679048	NA	0	0	0	0	1.90819	0
ENSMUST00000034087	0.347814	0.297401	3.84094	0.0774292	0.938282	NA	1.13279	0	0	0	0.954094	0	Snx20
ENSMUST00000034090	0.586103	0.517209	2.93361	0.176305	0.860054	NA	0	1.21901	0.90856	0	0	1.38905
ENSMUST00000034093	0.682149	1.83852	2.98116	0.616713	0.537424	NA	3.39837	0	0	0	0	0.694526	Eif2ak3
ENSMUST00000034094	1.32481	-1.28776	1.93752	-0.664641	0.50628	NA	1.13279	1.21901	0	2.04026	2.86228	0.694526	Gins3
ENSMUST00000034096	2.09761	-0.209962	1.59879	-0.131325	0.895518	NA	3.39837	2.43802	0	5.10065	0.954094	0.694526	Setd6
ENSMUST00000034097	1.27667	0.943138	1.90823	0.494247	0.621132	NA	2.26558	0	2.72568	1.02013	0.954094	0.694526	Got2
ENSMUST00000034133	0.592801	-2.57622	3.07131	-0.838802	0.401581	NA	0	0	0	0	2.86228	0.694526	Mylk3
ENSMUST00000034136	3.57509	3.05098	1.45998	2.08974	0.0366413	NA	9.06232	1.21901	9.0856	0	0	2.08358	Gpt2
ENSMUST00000034146	5.14088	-1.94367	1.06568	-1.82387	0.0681715	NA	4.53116	0	1.81712	7.14091	7.63275	9.72336	Ucp1
ENSMUST00000034162	0.665037	1.70163	2.78367	0.611291	0.541007	NA	0	1.21901	1.81712	0	0.954094	0	Pmfbp1
ENSMUST00000034172	0.92099	3.50584	2.44122	1.4361	0.150974	NA	3.39837	1.21901	0.90856	0	0	0	Ces1d
ENSMUST00000034183	3.18329	0.0883916	1.29971	0.0680086	0.945779	NA	1.13279	1.21901	7.26848	3.06039	5.72456	0.694526	Crnde
ENSMUST00000034185	0.566395	2.8031	3.41704	0.82033	0.412028	NA	3.39837	0	0	0	0	0
ENSMUST00000034187	1.42243	0.21535	2.03989	0.105569	0.915924	NA	0	0	4.5428	0	1.90819	2.08358
ENSMUST00000034203	2.03337	2.64114	1.71743	1.53785	0.124086	NA	1.13279	4.87603	4.5428	0	0.954094	0.694526	Cog4
ENSMUST00000034214	0.45428	2.52164	3.71856	0.678124	0.497693	NA	0	0	2.72568	0	0	0	Mt2
ENSMUST00000034218	0.571552	-2.52697	3.09078	-0.817583	0.413595	NA	0	0	0	2.04026	0	1.38905	Slc12a3
ENSMUST00000034230	1.02386	1.15588	2.11749	0.545872	0.585154	NA	1.13279	1.21901	1.81712	1.02013	0.954094	0	Cx3cl1
ENSMUST00000034231	0.940698	1.49536	2.43812	0.613324	0.539662	NA	0	2.43802	1.81712	0	0	1.38905	Ccl22
ENSMUST00000034232	4.29037	0.418805	1.0479	0.399663	0.689405	NA	4.53116	3.65702	6.35992	4.08052	5.72456	1.38905	Ccl17
ENSMUST00000034243	0.231509	-1.29121	4.06281	-0.317811	0.750628	NA	0	0	0	0	0	1.38905
ENSMUST00000034245	3.47561	-0.134895	1.15357	-0.116937	0.90691	NA	5.66395	2.43802	1.81712	4.08052	4.77047	2.08358	Usb1
ENSMUST00000034260	1.17384	-0.584228	2.06165	-0.283379	0.776886	NA	0	0	2.72568	1.02013	1.90819	1.38905	B3gnt3
ENSMUST00000034265	0.550431	-0.901207	3.21038	-0.280717	0.778928	NA	0	1.21901	0	0	0	2.08358	1700018B08Rik
ENSMUST00000034270	1.31047	0.425517	1.98429	0.214443	0.830202	NA	0	3.65702	0.90856	0	1.90819	1.38905	Map1lc3b
ENSMUST00000034277	0.940615	-1.95343	2.48293	-0.786744	0.431432	NA	1.13279	0	0	0	3.81638	0.694526	Emc8
ENSMUST00000034287	1.25807	1.83395	2.08145	0.881093	0.378268	NA	2.26558	0	3.63424	0	0.954094	0.694526	Klhl36
ENSMUST00000034300	0.420307	-0.339649	3.57139	-0.0951027	0.924233	NA	1.13279	0	0	0	0	1.38905	Hsbp1
ENSMUST00000034308	1.77404	0.159306	1.65725	0.0961265	0.92342	NA	1.13279	3.65702	0.90856	0	2.86228	2.08358	Bco1
ENSMUST00000034311	0.302853	1.9429	4.05892	0.478675	0.63217	NA	0	0	1.81712	0	0	0
ENSMUST00000034313	0.231509	-1.29121	4.06281	-0.317811	0.750628	NA	0	0	0	0	0	1.38905
ENSMUST00000034316	3.58736	2.69863	1.45469	1.85512	0.0635792	NA	1.13279	10.9711	6.35992	3.06039	0	0	Map3k21
ENSMUST00000034326	1.51594	1.85435	2.06741	0.896939	0.369751	NA	3.39837	3.65702	0	2.04026	0	0	Atp13a1
ENSMUST00000034339	3.95449	1.31217	1.15603	1.13507	0.256348	NA	1.13279	8.53306	7.26848	3.06039	0.954094	2.7781	Cdh5
ENSMUST00000034351	1.23107	-1.109	2.13407	-0.519666	0.603296	NA	1.13279	1.21901	0	4.08052	0.954094	0	Rrad
ENSMUST00000034359	1.25284	0.484138	1.91103	0.253339	0.800006	NA	1.13279	2.43802	0.90856	0	0.954094	2.08358	Tradd
ENSMUST00000034363	1.44561	3.01477	2.00668	1.50236	0.133003	NA	3.39837	2.43802	1.81712	1.02013	0	0	Hsd11b2
ENSMUST00000034365	3.86707	-1.27566	1.23199	-1.03545	0.300461	NA	1.13279	0	5.45136	2.04026	7.63275	6.94526	Tsnaxip1
ENSMUST00000034368	1.02386	1.15588	2.11749	0.545872	0.585154	NA	1.13279	1.21901	1.81712	1.02013	0.954094	0	Ctrl
ENSMUST00000034378	4.93941	0.857211	0.955946	0.896715	0.369871	NA	5.66395	6.09504	7.26848	3.06039	4.77047	2.7781	Slc7a6
ENSMUST00000034392	0.91026	2.36635	2.49725	0.947581	0.343343	NA	1.13279	0	3.63424	0	0	0.694526	Nip7
ENSMUST00000034398	0.340225	2.08636	3.83303	0.54431	0.586228	NA	1.13279	0	0.90856	0	0	0	Cep57
ENSMUST00000034411	3.11391	0.917798	1.22677	0.748141	0.454375	NA	2.26558	3.65702	6.35992	1.02013	1.90819	3.47263	Med17
ENSMUST00000034413	1.20424	1.91892	2.25264	0.851853	0.394296	NA	3.39837	2.43802	0	0	0	1.38905	Vstm5
ENSMUST00000034415	3.63095	1.49612	1.29622	1.15422	0.248411	NA	2.26558	12.1901	1.81712	2.04026	0	3.47263	Taf1d
ENSMUST00000034427	2.41154	0.0898198	1.46775	0.0611955	0.951204	NA	4.53116	1.21901	1.81712	2.04026	0	4.86168	Adat1
ENSMUST00000034428	0.455798	-2.19032	3.39665	-0.644847	0.519026	NA	0	0	0	2.04026	0	0.694526
ENSMUST00000034430	1.10856	0.28973	2.30438	0.12573	0.899945	NA	0	3.65702	0	2.04026	0.954094	0	Chst5
ENSMUST00000034435	2.41057	1.83958	1.50029	1.22614	0.220144	NA	5.66395	1.21901	4.5428	0	0.954094	2.08358	Ctrb1
ENSMUST00000034443	0.434677	-0.340788	3.52745	-0.0966103	0.923036	NA	0	1.21901	0	0	0	1.38905	Cdh15
ENSMUST00000034478	0.267181	0.297402	4.08047	0.0728841	0.941898	NA	0	0	0.90856	0	0	0.694526	St14
ENSMUST00000034483	2.74897	0.0675346	1.45345	0.0464652	0.962939	NA	0	4.87603	3.63424	0	3.81638	4.16715	1700128F08Rik
ENSMUST00000034510	5.58525	-0.242521	0.928223	-0.261275	0.793881	NA	3.39837	8.53306	3.63424	5.10065	3.81638	9.02883	Nectin1
ENSMUST00000034511	2.00511	0.319496	1.55788	0.205083	0.837507	NA	0	4.87603	1.81712	2.04026	1.90819	1.38905	Trim29
ENSMUST00000034512	0.614995	0.307694	2.70421	0.113783	0.90941	NA	1.13279	0	0.90856	0	0.954094	0.694526
ENSMUST00000034522	3.36409	-1.14689	1.19629	-0.958708	0.337706	NA	1.13279	2.43802	2.72568	4.08052	2.86228	6.94526	Clmp
ENSMUST00000034524	2.73544	0.0696842	1.55949	0.0446839	0.964359	NA	3.39837	1.21901	3.63424	8.16104	0	0	Rexo2
ENSMUST00000034527	0.560546	-2.50395	2.88511	-0.867888	0.385456	NA	0	0	0	1.02013	0.954094	1.38905
ENSMUST00000034533	0.687858	-1.3355	2.75911	-0.484033	0.628362	NA	1.13279	0	0	2.04026	0.954094	0	Kcnj5
ENSMUST00000034537	5.1129	0.880374	1.02304	0.860551	0.389485	NA	6.79674	1.21901	11.8113	4.08052	1.90819	4.86168	St3gal4
ENSMUST00000034543	2.77499	-0.0726161	1.37775	-0.0527061	0.957966	NA	4.53116	0	3.63424	1.02013	1.90819	5.5562	Rpusd4
ENSMUST00000034550	0.623475	0.628653	2.87259	0.218846	0.82677	NA	1.13279	1.21901	0	0	0	1.38905	4930510E17Rik
ENSMUST00000034562	0.318031	-1.66737	4.02977	-0.413763	0.679048	NA	0	0	0	0	1.90819	0
ENSMUST00000034564	4.27924	1.52835	1.10087	1.38831	0.165043	NA	6.79674	9.75206	2.72568	1.02013	1.90819	3.47263	2310030G06Rik
ENSMUST00000034592	1.07664	2.52537	2.38133	1.06049	0.288924	NA	4.53116	0	0.90856	1.02013	0	0
ENSMUST00000034600	0.643079	3.01549	2.97418	1.01389	0.310637	NA	1.13279	0	2.72568	0	0	0	Mpzl2
ENSMUST00000034602	4.21629	0.229306	1.10532	0.207457	0.835653	NA	7.92953	1.21901	4.5428	1.02013	5.72456	4.86168	Cd3d
ENSMUST00000034615	5.08712	0.0779129	0.951879	0.0818517	0.934765	NA	4.53116	8.53306	2.72568	5.10065	4.77047	4.86168	Pus3
ENSMUST00000034618	1.38541	-2.62397	2.05761	-1.27525	0.202222	NA	1.13279	0	0	1.02013	4.77047	1.38905	Nherf4
ENSMUST00000034619	0.532205	-0.732075	3.04251	-0.240615	0.809853	NA	0	1.21901	0	1.02013	0.954094	0	Pate6
ENSMUST00000034700	0.27477	-1.47986	4.0465	-0.365714	0.714579	NA	0	0	0	0	0.954094	0.694526	Yipf2
ENSMUST00000034709	0.391966	2.26108	3.62965	0.622948	0.533318	NA	1.13279	1.21901	0	0	0	0	Bcl2l10
ENSMUST00000034717	2.5181	0.549334	1.37061	0.400795	0.688571	NA	5.66395	2.43802	0.90856	3.06039	0.954094	2.08358	Kank2
ENSMUST00000034738	5.1792	0.367753	0.972588	0.378118	0.705343	NA	4.53116	3.65702	9.0856	8.16104	2.86228	2.7781	Rsl24d1
ENSMUST00000034749	0.862134	-0.19993	2.52842	-0.0790731	0.936974	NA	0	2.43802	0	2.04026	0	0.694526
ENSMUST00000034761	2.16089	-2.23266	1.77725	-1.25625	0.209027	NA	1.13279	1.21901	0	7.14091	0	3.47263	Ice2
ENSMUST00000034766	4.73589	0.641486	1.10108	0.582596	0.560166	NA	9.06232	0	8.17704	5.10065	1.90819	4.16715	Rora
ENSMUST00000034793	0.455798	-2.19032	3.39665	-0.644847	0.519026	NA	0	0	0	2.04026	0	0.694526
ENSMUST00000034796	0.477938	-0.524544	3.15668	-0.16617	0.868023	NA	0	1.21901	0	0	0.954094	0.694526
ENSMUST00000034803	2.05475	0.0688234	1.43994	0.0477959	0.961879	NA	1.13279	2.43802	2.72568	2.04026	1.90819	2.08358	Zw10
ENSMUST00000034815	0.433786	-2.12941	3.45939	-0.615545	0.538195	NA	0	0	0	0	1.90819	0.694526
ENSMUST00000034830	1.84273	0.572915	1.62377	0.352831	0.724215	NA	1.13279	3.65702	1.81712	3.06039	0	1.38905	Crabp1
ENSMUST00000034846	2.18499	1.51882	1.59512	0.952165	0.341013	NA	7.92953	0	1.81712	1.02013	0.954094	1.38905	1700017B05Rik
ENSMUST00000034848	2.02349	0.148517	1.46849	0.101136	0.919443	NA	3.39837	1.21901	1.81712	1.02013	1.90819	2.7781	Psma4
ENSMUST00000034851	2.77127	-1.44936	1.36876	-1.05889	0.289652	NA	1.13279	2.43802	0.90856	4.08052	6.67866	1.38905	Chrna3
ENSMUST00000034854	3.0849	1.15396	1.29038	0.894281	0.371172	NA	6.79674	2.43802	3.63424	0	2.86228	2.7781	Chrnb4
ENSMUST00000034874	1.35083	1.27934	1.99474	0.641356	0.521292	NA	0	1.21901	4.5428	0	0.954094	1.38905	Cyp11a1
ENSMUST00000034879	3.00441	4.17808	1.64613	2.53811	0.0111452	NA	3.39837	7.31405	6.35992	0	0.954094	0	Hmg20a
ENSMUST00000034881	2.42891	3.85182	1.73728	2.21715	0.0266126	NA	5.66395	2.43802	5.45136	1.02013	0	0	Cox7a2
ENSMUST00000034889	0.852393	-0.793363	2.50925	-0.316176	0.751869	NA	0	0	1.81712	0	1.90819	1.38905	Hcn4
ENSMUST00000034896	0.971934	-1.02574	2.43641	-0.421007	0.67375	NA	0	0	1.81712	3.06039	0.954094	0	Mto1
ENSMUST00000034903	5.6874	3.65202	1.18491	3.0821	0.00205549	NA	10.1951	13.4091	8.17704	0	0.954094	1.38905	Gsta4
ENSMUST00000034915	1.63549	0.778265	1.71716	0.453229	0.650384	NA	3.39837	0	2.72568	2.04026	0.954094	0.694526	Ctsh
ENSMUST00000034949	2.45034	-0.711166	1.39979	-0.508053	0.611416	NA	1.13279	3.65702	0.90856	1.02013	3.81638	4.16715	Csnk1g1
ENSMUST00000034955	0.738338	-1.52096	2.65689	-0.572458	0.567012	NA	1.13279	0	0	0	1.90819	1.38905	Spg21
ENSMUST00000034966	5.78813	0.32959	0.935969	0.352138	0.724735	NA	11.3279	2.43802	5.45136	5.10065	7.63275	2.7781	Rpl4
ENSMUST00000034986	0.51361	1.17398	3.07947	0.381228	0.703034	NA	0	1.21901	0.90856	0	0.954094	0	Ube2cbp
ENSMUST00000034988	0.231509	-1.29121	4.06281	-0.317811	0.750628	NA	0	0	0	0	0	1.38905
ENSMUST00000034989	0.318922	0.297401	3.97047	0.0749034	0.940292	NA	0	1.21901	0	0	0	0.694526	Me1
ENSMUST00000035037	1.74138	-0.548849	1.70266	-0.322347	0.74719	NA	3.39837	0	0.90856	1.02013	0.954094	4.16715	Pik3cb
ENSMUST00000035045	0.347263	-1.8428	4.01591	-0.458875	0.646324	NA	0	0	0	0	0	2.08358	Mras
ENSMUST00000035055	4.79396	-1.80683	1.05989	-1.70474	0.0882431	NA	3.39837	1.21901	1.81712	7.14091	4.77047	10.4179	Map4
ENSMUST00000035061	3.60897	-0.526202	1.13744	-0.462619	0.643637	NA	3.39837	3.65702	1.81712	7.14091	2.86228	2.7781	Ngp
ENSMUST00000035069	0.875794	0.830494	2.51611	0.330071	0.741346	NA	0	2.43802	0.90856	0	1.90819	0	Nradd
ENSMUST00000035086	1.28851	1.1418	1.89013	0.604083	0.545788	NA	1.13279	2.43802	1.81712	0	0.954094	1.38905	Pdcd6ip
ENSMUST00000035094	1.23803	1.48612	2.07169	0.717347	0.47316	NA	1.13279	2.43802	1.81712	2.04026	0	0	Exog
ENSMUST00000035105	4.20427	0.482507	1.13499	0.425121	0.670749	NA	5.66395	2.43802	6.35992	8.16104	1.90819	0.694526	Rpsa
ENSMUST00000035110	1.22355	-0.445572	2.20394	-0.202171	0.839783	NA	2.26558	0	0.90856	0	0	4.16715	Hhatl
ENSMUST00000035115	1.66196	-0.922153	1.72592	-0.534297	0.593136	NA	1.13279	2.43802	0	1.02013	1.90819	3.47263	Vipr1
ENSMUST00000035148	3.97355	0.349274	1.12419	0.310691	0.756036	NA	5.66395	6.09504	1.81712	3.06039	0.954094	6.25073	Slco2a1
ENSMUST00000035154	0.798495	-1.72145	2.61938	-0.657197	0.511055	NA	0	0	0.90856	1.02013	2.86228	0	1110059G10Rik
ENSMUST00000035155	5.20611	-0.357937	0.929308	-0.385166	0.700115	NA	3.39837	4.87603	5.45136	5.10065	4.77047	7.63978	Rab6b
ENSMUST00000035157	3.23743	1.4757	1.21989	1.2097	0.226393	NA	3.39837	7.31405	3.63424	2.04026	0.954094	2.08358	Srprb
ENSMUST00000035158	0.285776	-1.52701	4.04209	-0.377777	0.705596	NA	0	0	0	1.02013	0	0.694526	Trf
ENSMUST00000035163	2.93173	-0.936546	1.38979	-0.673875	0.500391	NA	2.26558	0	3.63424	1.02013	8.58685	2.08358	Inhca
ENSMUST00000035166	3.36147	-1.84385	1.2791	-1.44152	0.149438	NA	2.26558	1.21901	0.90856	9.18118	3.81638	2.7781	Uba5
ENSMUST00000035167	0.787489	-1.70411	2.83859	-0.600336	0.548282	NA	0	0	0.90856	0	3.81638	0
ENSMUST00000035170	1.28352	-2.55428	2.08074	-1.22758	0.219605	NA	0	0	0.90856	3.06039	0.954094	2.7781	Dnajc13
ENSMUST00000035181	0.27477	-1.47986	4.0465	-0.365714	0.714579	NA	0	0	0	0	0.954094	0.694526
ENSMUST00000035230	0.560546	-2.50395	2.88511	-0.867888	0.385456	NA	0	0	0	1.02013	0.954094	1.38905	Amt
ENSMUST00000035258	1.46095	-0.981896	1.94572	-0.504645	0.613808	NA	1.13279	0	1.81712	0	0.954094	4.86168	Ms4a4b
ENSMUST00000035278	0.607406	1.66916	2.86762	0.582071	0.560519	NA	1.13279	0	1.81712	0	0	0.694526	Marchf3
[truncated: 40,229 more rows]

## Sheet: P<0.05, |FC|>1
	baseMean	log2FoldChange	lfcSE	stat	pvalue	padj	WT_ES1	WT_ES2	WT_ES3	WT_RS1	WT_RS2	WT_RS3	Symbol
ENSMUST00000133297	7.46096	-2.59777	0.915417	-2.83781	0.00454248	0.0379117	1.13279	2.43802	2.72568	11.2214	13.3573	13.8905	Pi4kb
ENSMUST00000037807	7.20098	-2.53143	0.927891	-2.72816	0.00636893	0.049542	1.13279	2.43802	2.72568	15.302	10.495	11.1124	Vax2
ENSMUST00000223443	14.5058	-2.49792	0.672626	-3.71368	0.000204269	0.00270407	6.79674	3.65702	2.72568	28.5637	28.6228	16.6686	AU015791
ENSMUST00000217551	10.5262	-2.47794	0.796432	-3.1113	0.00186268	0.017912	1.13279	4.87603	3.63424	22.4429	9.54094	21.5303	Gm30015
ENSMUST00000128468	10.3683	-2.27842	0.769719	-2.96006	0.00307578	0.0273317	2.26558	3.65702	4.5428	19.3825	21.9442	10.4179	Kat2b-ps
ENSMUST00000146581	11.3936	-2.15474	0.735389	-2.93007	0.00338885	0.0295527	3.39837	3.65702	5.45136	14.2818	12.4032	29.1701	Igf1os
ENSMUST00000187142	10.1629	-2.0858	0.751965	-2.7738	0.00554058	0.0446498	4.53116	2.43802	4.5428	12.2416	21.9442	15.2796	Zfp469
ENSMUST00000061187	18.8152	-2.06433	0.586741	-3.51831	0.00043431	0.00525632	4.53116	10.9711	6.35992	45.9059	22.8983	22.2248	Dmrta2
ENSMUST00000238207	11.5583	-1.97062	0.70494	-2.79544	0.00518283	0.042196	3.39837	7.31405	3.63424	13.2617	18.1278	23.6139	Lrp8
ENSMUST00000193148	15.7641	-1.8678	0.588578	-3.17341	0.00150661	0.0150209	5.66395	7.31405	7.26848	30.6039	22.8983	20.8358	Gm37400
ENSMUST00000127429	14.0367	-1.86685	0.636073	-2.93496	0.00333591	0.0292645	7.92953	4.87603	5.45136	16.3221	19.0819	30.5591	Gm10371
ENSMUST00000218201	27.8057	-1.83441	0.468057	-3.9192	8.88e-05	0.00124829	13.5935	17.0661	6.35992	49.9864	45.7965	34.0318	Gm48689
ENSMUST00000143302	14.5718	-1.79645	0.606344	-2.96276	0.00304898	0.0271638	5.66395	8.53306	5.45136	24.4831	23.8523	19.4467	Gm11521
ENSMUST00000141646	16.4983	-1.75213	0.579225	-3.02496	0.00248669	0.022846	6.79674	8.53306	7.26848	27.5435	31.4851	17.3631	Xndc1
ENSMUST00000081728	13.2655	-1.75089	0.633128	-2.76546	0.00568421	0.0455577	7.92953	4.87603	5.45136	17.3422	23.8523	20.1412	Ctnnd2
ENSMUST00000223146	17.1513	-1.73564	0.557842	-3.11135	0.00186231	0.017912	6.79674	9.75206	7.26848	31.624	23.8523	23.6139	NA
ENSMUST00000200431	17.6603	-1.72797	0.547654	-3.15523	0.00160371	0.0157903	10.1951	6.09504	8.17704	28.5637	28.6228	24.3084	Sgms2
ENSMUST00000159064	16.9023	-1.71752	0.574081	-2.99176	0.0027737	0.0249925	12.4607	4.87603	6.35992	22.4429	29.5769	25.6974	4933434E20Rik
ENSMUST00000120824	16.2346	-1.6754	0.590781	-2.8359	0.00456968	0.038077	5.66395	13.4091	4.5428	23.463	26.7146	23.6139	Gm15550
ENSMUST00000198351	21.3714	-1.67391	0.533071	-3.14013	0.00168875	0.0165002	11.3279	6.09504	12.7198	35.7046	42.9342	19.4467	Gm43714
ENSMUST00000202084	37.4561	-1.65527	0.411706	-4.02051	5.81e-05	0.000859323	18.1246	14.6281	20.8969	55.0871	79.1898	36.8099	Gm10829
ENSMUST00000133633	18.882	-1.60832	0.553015	-2.90827	0.00363432	0.0314273	15.8591	4.87603	7.26848	25.5033	33.3933	26.392	Ckap5
ENSMUST00000201473	42.0211	-1.60528	0.358336	-4.4798	7.47e-06	0.000132212	27.187	17.0661	18.1712	66.3085	62.9702	60.4237	Rab28
ENSMUST00000154066	20.4521	-1.59111	0.520172	-3.05882	0.00222213	0.0207674	12.4607	10.9711	7.26848	31.624	38.1638	22.2248	A430078I02Rik
ENSMUST00000183120	16.4439	-1.58548	0.580672	-2.73042	0.00632545	0.0492603	3.39837	12.1901	9.0856	26.5234	23.8523	23.6139	Ntn5
ENSMUST00000220063	25.5995	-1.55493	0.466667	-3.33199	0.000862272	0.00934794	9.06232	12.1901	17.2626	44.8857	41.026	29.1701	Gm48379
ENSMUST00000228794	20.5827	-1.52407	0.519437	-2.93408	0.00334542	0.029298	13.5935	12.1901	6.35992	38.765	24.8064	27.781	4930572G02Rik
ENSMUST00000036340	21.6165	-1.50888	0.518217	-2.91169	0.00359484	0.0311382	19.2574	7.31405	7.26848	34.6844	33.3933	27.781	Fancd2
ENSMUST00000157187	25.406	-1.49298	0.479529	-3.11344	0.00184921	0.0178324	18.1246	6.09504	15.4455	43.8656	28.6228	40.2825	Gm25115
ENSMUST00000179443	158.08	-1.48981	0.195906	-7.60474	2.85e-14	1.05e-12	71.3658	78.0165	98.1245	249.932	246.156	204.885	Gfy
ENSMUST00000176280	17.8806	-1.48729	0.538787	-2.76045	0.00577216	0.0461191	9.06232	12.1901	7.26848	22.4429	25.7605	30.5591	Gm19031
ENSMUST00000184160	19.3012	-1.46417	0.518225	-2.82536	0.00472276	0.0391019	10.1951	8.53306	11.8113	30.6039	32.4392	22.2248	Acrv1
ENSMUST00000226253	19.7661	-1.45851	0.513804	-2.83866	0.00453039	0.0378711	12.4607	12.1901	7.26848	25.5033	33.3933	27.781	Cblb
ENSMUST00000167016	20.9262	-1.4478	0.509932	-2.8392	0.00452268	0.0378692	13.5935	6.09504	13.6284	37.7448	26.7146	27.781	Gm17030
ENSMUST00000211023	36.0866	-1.44543	0.386268	-3.74205	0.000182527	0.00243503	19.2574	17.0661	21.8054	40.8052	54.3834	63.2018	Gm45261
ENSMUST00000193445	22.6405	-1.44423	0.484038	-2.98371	0.00284774	0.0255478	16.9919	8.53306	10.9027	34.6844	36.2556	28.4755	Gm37763
ENSMUST00000202675	21.4672	-1.41175	0.505949	-2.79029	0.00526607	0.0428398	13.5935	14.6281	7.26848	27.5435	40.0719	25.6974	Gm30270
ENSMUST00000194483	44.7468	-1.4076	0.337717	-4.168	3.07e-05	0.000482434	27.187	20.7231	25.4397	68.3487	60.1079	66.6745	Gm37534
ENSMUST00000205219	31.0298	-1.392	0.412874	-3.37149	0.00074764	0.00827062	12.4607	15.8471	22.714	43.8656	41.9801	49.3113	Gm44199
ENSMUST00000192961	45.8813	-1.38545	0.336922	-4.11206	3.92e-05	0.000603684	24.9214	21.9421	29.0739	57.1273	73.4652	68.758	Cep170
ENSMUST00000199916	36.3366	-1.32946	0.382938	-3.47173	0.000517115	0.00611454	19.2574	20.7231	21.8054	52.0267	63.9243	40.2825	Gm36448
ENSMUST00000130270	42.9152	-1.32585	0.355852	-3.72584	0.000194662	0.00258687	23.7886	21.9421	27.2568	78.5501	52.4752	53.4785	Bicd1
ENSMUST00000121220	59.4723	-1.30316	0.288611	-4.51528	6.32e-06	0.000112477	33.9837	35.3512	33.6167	84.6708	85.8685	83.3431	Gm13862
ENSMUST00000212627	26.9437	-1.28074	0.467642	-2.73873	0.00616769	0.0483417	6.79674	18.2851	21.8054	30.6039	43.8883	40.2825	Gm45892
ENSMUST00000210011	39.308	-1.27026	0.383022	-3.31642	0.000911783	0.00979192	32.8509	23.1612	13.6284	61.2078	51.5211	53.4785	Gm2516
ENSMUST00000144376	73.0991	-1.26399	0.267884	-4.71842	2.38e-06	4.43e-05	40.7805	37.7892	49.9708	91.8118	107.813	110.43	Rasa2
ENSMUST00000216771	28.2947	-1.26293	0.449176	-2.81166	0.0049286	0.0404459	14.7263	20.7231	14.537	57.1273	28.6228	34.0318	Tmem263
ENSMUST00000219443	53.0682	-1.25225	0.311025	-4.02619	5.67e-05	0.000840028	35.1165	28.0372	30.8911	68.3487	85.8685	70.1471	Arhgap5
ENSMUST00000222277	31.1811	-1.251	0.403511	-3.10028	0.00193338	0.0184199	16.9919	18.2851	19.9883	49.9864	35.3015	46.5332	1810034E14Rik
ENSMUST00000142294	37.0835	-1.24694	0.364619	-3.41984	0.000626576	0.00715422	22.6558	19.5041	23.6226	49.9864	55.3375	51.3949	Sox5
ENSMUST00000219034	32.1533	-1.24547	0.393692	-3.16355	0.00155856	0.0154639	20.3902	15.8471	20.8969	42.8455	42.9342	50.0058	Gm48226
ENSMUST00000137907	44.1271	-1.24171	0.337713	-3.67682	0.000236156	0.00306318	22.6558	31.6942	24.5311	62.228	63.9243	59.7292	Cep112os1
ENSMUST00000108743	140.191	-1.23716	0.215089	-5.75182	8.83e-09	2.23e-07	108.748	67.0454	74.5019	221.368	196.543	172.937
ENSMUST00000118983	34.046	-1.235	0.396583	-3.11409	0.00184515	0.01781	23.7886	15.8471	20.8969	56.1072	51.5211	36.1153	Gm11447
ENSMUST00000205188	37.3648	-1.22074	0.368148	-3.31591	0.000913464	0.00979976	22.6558	26.8182	18.1712	49.9864	57.2456	49.3113	Avl9
ENSMUST00000163013	38.0278	-1.21095	0.364847	-3.31908	0.000903148	0.00975002	26.0542	21.9421	20.8969	47.9461	62.0161	49.3113	Fndc3a
ENSMUST00000020827	26.6186	-1.20848	0.437491	-2.76231	0.00573948	0.0459649	13.5935	13.4091	20.8969	39.7851	32.4392	39.588	Rnft1
ENSMUST00000193098	88.8439	-1.19417	0.237545	-5.02714	4.98e-07	1.03e-05	56.6395	48.7603	56.3307	128.536	124.032	118.764	Cep170
ENSMUST00000138435	36.1417	-1.18479	0.374835	-3.16083	0.0015732	0.0155344	20.3902	28.0372	18.1712	47.9461	54.3834	47.9223	Rnf220
ENSMUST00000231902	129.727	-1.18232	0.215824	-5.47816	4.3e-08	1.02e-06	87.2249	95.0826	57.2393	178.523	183.186	177.104	Gm5676
ENSMUST00000207569	31.318	-1.16547	0.39451	-2.95423	0.0031345	0.0277816	20.3902	19.5041	18.1712	44.8857	39.1179	45.8387	Unc13b
ENSMUST00000031183	38.7705	-1.14412	0.358919	-3.18768	0.00143419	0.0144104	22.6558	23.1612	26.3482	62.228	49.6129	48.6168	Ugt2b1
ENSMUST00000212893	48.724	-1.14076	0.330809	-3.4484	0.000563924	0.00659043	36.2493	23.1612	31.7996	55.0871	69.6489	76.3978	Gm45697
ENSMUST00000187024	65.5717	-1.13664	0.280667	-4.04979	5.13e-05	0.000768494	46.4444	42.6653	34.5253	87.7312	82.0521	100.012	Mast4
ENSMUST00000198433	32.1687	-1.13214	0.412052	-2.74757	0.00600393	0.0474191	22.6558	25.5992	12.7198	52.0267	36.2556	43.7551	Gm42816
ENSMUST00000152930	56.6745	-1.12177	0.338701	-3.31197	0.000926419	0.00992623	52.1084	32.9132	22.714	87.7312	59.1538	85.4266	Ccdc34
ENSMUST00000005933	34.571	-1.1197	0.382507	-2.92725	0.00341969	0.0297713	28.3198	17.0661	19.9883	45.9059	49.6129	46.5332	Klk1b16
ENSMUST00000101432	63.1764	-1.11916	0.322525	-3.47001	0.000520446	0.00613983	52.1084	47.5413	20.8969	91.8118	79.1898	87.5102	Npas3
ENSMUST00000194507	46.893	-1.11436	0.359348	-3.10107	0.00192823	0.0184048	20.3902	35.3512	32.7082	78.5501	70.603	43.7551	Gm38325
ENSMUST00000058358	59.756	-1.11135	0.28855	-3.85148	0.000117408	0.00161872	39.6477	31.6942	41.7938	79.5702	81.098	84.7321	Leng9
ENSMUST00000214890	37.8366	-1.10835	0.357658	-3.09892	0.0019423	0.0184707	24.9214	24.3802	22.714	48.9663	55.3375	50.7004	Gm47535
ENSMUST00000192409	33.8273	-1.09916	0.394511	-2.78613	0.00533419	0.0433256	22.6558	26.8182	15.4455	55.0871	41.9801	40.977	Pcdhb22
ENSMUST00000201648	102.334	-1.09465	0.230421	-4.75063	2.03e-06	3.85e-05	73.6314	67.0454	55.4222	159.14	131.665	127.098	Gm42531
ENSMUST00000137116	46.1444	-1.08874	0.326298	-3.33663	0.000848014	0.00920305	26.0542	31.6942	30.8911	58.1474	62.0161	68.0635	Utp23
ENSMUST00000118782	60.0952	-1.08694	0.298063	-3.64668	0.000265649	0.00340713	43.046	37.7892	34.5253	79.5702	98.2717	67.369	Gm13863
ENSMUST00000203407	35.1127	-1.08391	0.369614	-2.93255	0.0033619	0.0293924	22.6558	23.1612	21.8054	47.9461	45.7965	49.3113	6430590A07Rik
ENSMUST00000202649	32.8588	-1.08386	0.394187	-2.7496	0.00596682	0.0473074	22.6558	15.8471	24.5311	43.8656	38.1638	52.0894	Gm42852
ENSMUST00000191616	31.4865	-1.08113	0.394634	-2.73959	0.00615167	0.0482746	21.523	18.2851	20.8969	39.7851	39.1179	49.3113	Gm37950
ENSMUST00000199688	115.247	-1.07783	0.212804	-5.06492	4.09e-07	8.62e-06	80.4281	70.7025	70.8677	165.261	166.012	138.211	Gm42951
ENSMUST00000162432	67.6029	-1.07557	0.290352	-3.70436	0.000211925	0.00279107	39.6477	43.8843	46.3366	109.154	99.2258	67.369	Gm16169
ENSMUST00000180741	96.9855	-1.07515	0.242757	-4.42893	9.47e-06	0.000164201	49.8428	65.8264	70.8677	131.597	152.655	111.124	Gm16630
ENSMUST00000207855	80.9521	-1.07379	0.25108	-4.27668	1.9e-05	0.000312592	54.3739	54.8554	47.2451	120.375	111.629	97.2336	Xrra1
ENSMUST00000220879	37.3379	-1.07359	0.373641	-2.87332	0.00406179	0.0344299	32.8509	19.5041	19.9883	45.9059	54.3834	51.3949	Gm4811
ENSMUST00000156629	56.6812	-1.06628	0.298878	-3.56762	0.000360239	0.0044808	30.5853	39.0083	39.9767	85.691	75.3734	69.4526	1700093K21Rik
ENSMUST00000152351	44.9681	-1.06454	0.337825	-3.15115	0.00162629	0.0159668	30.5853	26.8182	29.9825	62.228	48.6588	71.5361	Fhad1os2
ENSMUST00000029240	43.3491	-1.04214	0.335326	-3.10785	0.00188456	0.0180661	26.0542	26.8182	31.7996	60.1877	61.062	54.173	Slc2a2
ENSMUST00000042766	68.1976	-1.04133	0.293543	-3.54745	0.000388976	0.00477481	35.1165	54.8554	43.6109	112.214	92.5471	70.8416	Ppm1k
ENSMUST00000090461	42.8817	-1.03695	0.342425	-3.02827	0.00245957	0.0226575	26.0542	24.3802	33.6167	57.1273	51.5211	64.5909	Fyb
ENSMUST00000213578	77.7218	-1.0309	0.292645	-3.52269	0.000427197	0.00518833	62.3035	62.1694	29.9825	113.234	86.8226	111.819	Gm18942
ENSMUST00000205414	82.4078	-1.01487	0.253748	-3.99953	6.35e-05	0.000931144	61.1707	47.5413	54.5136	129.557	103.042	98.6226	Gm44711
ENSMUST00000236447	73.3257	-1.0094	0.264484	-3.8165	0.00013536	0.00184158	54.3739	40.2273	50.8794	102.013	104.95	87.5102	Gm50335
ENSMUST00000031982	80.3326	-1.005	0.252756	-3.97615	7e-05	0.00101454	52.1084	53.6364	54.5136	92.8319	124.032	104.873	Hpgds
ENSMUST00000207643	53.3737	-1.00194	0.306629	-3.26759	0.00108467	0.0113411	29.4525	43.8843	33.6167	71.4091	69.6489	72.2307	Gm44621
ENSMUST00000149364	50.4577	1.00471	0.309371	3.24759	0.00116387	0.0120349	63.4363	74.3595	64.5078	35.7046	28.6228	36.1153	4930563I02Rik
ENSMUST00000100723	51.3762	1.00611	0.311931	3.22542	0.00125787	0.0128903	67.9674	60.9504	77.2276	30.6039	30.531	40.977	1700024G13Rik
ENSMUST00000139309	98.9024	1.00907	0.241768	4.17373	3e-05	0.000471903	141.599	143.843	111.753	48.9663	79.1898	68.0635	Gm15479
ENSMUST00000202427	204.818	1.01011	0.161591	6.25107	4.08e-10	1.16e-08	283.198	245.021	291.648	146.899	136.435	125.709	Gm42477
ENSMUST00000228553	103.192	1.01025	0.231962	4.35526	1.33e-05	0.000225506	116.677	162.128	134.467	68.3487	79.1898	58.3401	Gm49036
ENSMUST00000066675	49.2853	1.01049	0.347941	2.90419	0.00368201	0.0317331	81.5609	57.2934	58.1479	47.9461	25.7605	25.0029	Mtif3
ENSMUST00000020217	1615.18	1.01438	0.0743314	13.6467	2.11e-42	1.71e-40	2093.4	2101.57	2289.57	997.688	1062.86	1145.97	Nudt4
ENSMUST00000054145	159.32	1.02029	0.194682	5.24081	1.6e-07	3.57e-06	254.878	202.355	184.438	90.7916	103.996	119.458	Dcaf5
ENSMUST00000079597	180.612	1.02076	0.194951	5.23597	1.64e-07	3.65e-06	198.238	246.24	282.562	106.094	103.996	146.545	Paqr9
ENSMUST00000027252	280.004	1.02477	0.137892	7.43165	1.07e-13	3.82e-12	402.141	375.454	349.796	173.422	188.911	190.3	Eif5b
ENSMUST00000180270	67.1107	1.02539	0.312565	3.28056	0.00103602	0.0109661	69.1002	82.8925	117.204	36.7247	62.0161	34.7263
ENSMUST00000000608	101.116	1.02661	0.228047	4.50174	6.74e-06	0.000119475	123.474	125.558	158.089	59.1676	66.7866	73.6197	Gm2a
ENSMUST00000196448	208.048	1.02949	0.184961	5.56596	2.61e-08	6.35e-07	244.683	346.198	246.22	156.08	141.206	113.902
ENSMUST00000052168	34.9382	1.03643	0.378724	2.73664	0.00620692	0.0486123	58.9051	45.1033	37.251	21.4227	21.9442	25.0029	Otud1
ENSMUST00000203740	112.105	1.03856	0.212825	4.87986	1.06e-06	2.08e-05	143.864	153.595	154.455	85.691	64.8784	70.1471	Gm43959
ENSMUST00000030769	407.405	1.0392	0.122138	8.50842	1.76e-17	7.47e-16	552.802	526.611	566.942	247.892	248.064	302.119	Psmc2
ENSMUST00000039535	912.289	1.0413	0.0961299	10.8322	2.42e-27	1.49e-25	1334.43	1256.8	1092.09	648.803	576.273	565.344	Wdr38
ENSMUST00000181545	44.7979	1.0437	0.329714	3.16546	0.0015484	0.0153829	57.7723	57.2934	65.4163	30.6039	33.3933	24.3084
ENSMUST00000111466	387.505	1.04398	0.129638	8.05304	8.08e-16	3.21e-14	470.108	525.392	571.484	223.409	254.743	279.894	C1qtnf4
ENSMUST00000147403	673.693	1.04466	0.0916993	11.3923	4.57e-30	3.08e-28	881.311	911.818	928.549	454.978	429.342	436.162	Cnp
ENSMUST00000060417	54.2673	1.04583	0.306299	3.41441	0.000639213	0.00728236	82.6937	59.7314	76.3191	39.7851	37.2097	29.8646	Trp53i13
ENSMUST00000025497	47.0492	1.04675	0.332317	3.14986	0.00163348	0.0160069	50.9756	59.7314	79.0447	35.7046	27.6687	29.1701	Fbn2
ENSMUST00000129059	55.1565	1.04721	0.297241	3.52311	0.000426522	0.00518625	72.4986	82.8925	68.142	34.6844	32.4392	40.2825	2610206C17Rik
ENSMUST00000107094	52.294	1.05007	0.300709	3.49197	0.00047948	0.00574205	65.7018	73.1405	72.6848	32.6442	36.2556	33.3372	Jun
ENSMUST00000067399	47.9947	1.05176	0.336384	3.12666	0.00176805	0.0171781	72.4986	75.5785	46.3366	28.5637	37.2097	27.781	B3gntl1
ENSMUST00000208569	41.5197	1.05197	0.34855	3.01814	0.00254328	0.0233212	54.3739	65.8264	48.1537	30.6039	20.9901	29.1701	Lysmd4
ENSMUST00000051212	162.637	1.05375	0.19057	5.52945	3.21e-08	7.71e-07	249.214	220.64	188.072	123.436	102.088	92.3719	Gm9823
ENSMUST00000191453	117.139	1.05408	0.215306	4.89574	9.79e-07	1.92e-05	158.591	146.281	168.084	86.7111	82.0521	61.1182	Gm29430
ENSMUST00000196669	265.204	1.05889	0.147184	7.19433	6.28e-13	2.17e-11	410.07	320.599	344.344	176.483	168.875	170.853	Gm29151
ENSMUST00000032168	150.212	1.05958	0.181833	5.82721	5.64e-09	1.44e-07	210.699	190.165	208.06	91.8118	103.996	96.5391	Sec61a1
ENSMUST00000052366	41.366	1.05992	0.352174	3.00965	0.00261549	0.0239014	46.4444	52.4173	69.0506	24.4831	23.8523	31.9482	Pcdhb1
ENSMUST00000099525	1166.16	1.06092	0.0874744	12.1284	7.47e-34	5.38e-32	1715.04	1620.06	1395.55	786.521	739.423	740.364	Ranbp6
ENSMUST00000155372	1391.21	1.06148	0.0738657	14.3704	7.94e-47	7.05e-45	1918.95	1898	1823.48	954.842	910.206	841.765	Kbtbd4
ENSMUST00000053086	100.024	1.06482	0.227007	4.69069	2.72e-06	5.02e-05	132.536	156.033	118.113	65.2884	60.1079	68.0635	Adam6a
ENSMUST00000209541	72.934	1.06629	0.264723	4.02794	5.63e-05	0.000835025	106.482	102.397	87.2218	42.8455	56.2915	42.3661	Gm10252
ENSMUST00000213058	49.3249	1.06695	0.339714	3.14073	0.00168526	0.0164829	69.1002	65.8264	66.3249	28.5637	20.9901	45.1442	Alms1
ENSMUST00000214963	70.8889	1.06869	0.289718	3.68872	0.000225381	0.00293823	70.233	99.9587	118.113	45.9059	36.2556	54.8675	Gm5922
ENSMUST00000181385	128.413	1.06994	0.200332	5.34084	9.25e-08	2.11e-06	185.778	163.347	173.535	80.5903	73.4652	93.7609	Gm26781
ENSMUST00000216192	265.078	1.07082	0.149581	7.15881	8.14e-13	2.78e-11	369.29	382.769	324.356	187.704	178.416	147.934	Clk3
ENSMUST00000153106	388.517	1.07245	0.118074	9.08289	1.06e-19	5.09e-18	493.897	543.678	542.41	256.053	239.478	255.585	Gm16130
ENSMUST00000052678	185.398	1.0738	0.174127	6.16676	6.97e-10	1.94e-08	241.284	235.269	277.111	134.657	101.134	122.931	Flnb
ENSMUST00000183857	183.601	1.07404	0.177183	6.06171	1.35e-09	3.64e-08	275.268	251.116	219.872	137.718	110.675	106.957	Mir6340
ENSMUST00000049149	49.6292	1.07571	0.311166	3.45705	0.000546133	0.00640618	60.0379	68.2644	73.5934	29.5838	34.3474	31.9482	Lrp1
ENSMUST00000060041	261.713	1.08088	0.141432	7.64237	2.13e-14	7.9e-13	331.908	351.074	382.504	170.362	169.829	164.603	Ccdc185
ENSMUST00000161925	206.064	1.08393	0.157905	6.86443	6.68e-12	2.14e-10	271.87	286.467	280.745	143.838	132.619	120.847	Gm15996
ENSMUST00000040636	115.256	1.08396	0.212735	5.09536	3.48e-07	7.39e-06	150.661	180.413	139.01	79.5702	69.6489	72.2307	Sec1
ENSMUST00000036304	48.6784	1.08622	0.337067	3.22257	0.00127046	0.0129677	78.1625	51.1983	69.0506	23.463	41.026	29.1701	Pldi
ENSMUST00000119103	52.008	1.0863	0.314067	3.45881	0.000542573	0.00637895	60.0379	86.5496	65.4163	33.6643	37.2097	29.1701	Bco2
ENSMUST00000051283	559.363	1.08864	0.107736	10.1047	5.27e-24	3.01e-22	743.11	761.88	780.453	339.703	328.208	402.825	Clec2m
ENSMUST00000032808	354.241	1.09263	0.132151	8.26806	1.36e-16	5.61e-15	464.444	454.69	525.148	242.791	240.432	197.94	2200002D01Rik
ENSMUST00000106268	208.613	1.09268	0.172597	6.33082	2.44e-10	7.11e-09	297.924	268.182	288.014	116.295	117.354	163.908	Tmco2
ENSMUST00000105818	69.0116	1.09301	0.265854	4.11131	3.93e-05	0.00060474	90.6232	99.9587	91.7646	37.7448	46.7506	47.2277	Kif17
ENSMUST00000165133	293.939	1.09438	0.13524	8.09211	5.86e-16	2.36e-14	390.813	430.31	380.687	194.845	174.599	192.384	Spata31d1b
ENSMUST00000000049	38.1488	1.09477	0.374987	2.91948	0.00350615	0.0304468	60.0379	39.0083	56.3307	32.6442	20.036	20.8358	Apoh
ENSMUST00000052416	29.1801	1.097	0.401087	2.73506	0.00623685	0.0488058	37.3821	40.2273	41.7938	18.3624	17.1737	20.1412	Lkaaear1
ENSMUST00000237494	104.62	1.09921	0.222068	4.94989	7.43e-07	1.48e-05	159.723	138.967	129.016	75.4897	62.0161	62.5073	Gm50108
ENSMUST00000135378	34.2589	1.10147	0.397055	2.77409	0.00553564	0.0446449	46.4444	53.6364	39.9767	17.3422	31.4851	16.6686	Gm15337
ENSMUST00000226277	71.1844	1.10281	0.335743	3.28469	0.00102093	0.0108286	146.13	67.0454	79.0447	44.8857	29.5769	60.4237	Mroh2b
ENSMUST00000035854	68.2563	1.10304	0.271397	4.06431	4.82e-05	0.000728557	84.9593	97.5206	96.3074	51.0065	42.9342	36.8099	Cdrt4
ENSMUST00000043797	60.5902	1.10323	0.311873	3.53744	0.000404022	0.00494771	63.4363	71.9215	112.661	36.7247	34.3474	44.4496	Capza3
ENSMUST00000127307	163.937	1.10647	0.182982	6.04689	1.48e-09	3.98e-08	215.23	245.021	210.786	103.033	119.262	90.2883	Gm15891
ENSMUST00000187797	78.9417	1.11173	0.260582	4.26633	1.99e-05	0.000325892	107.615	103.616	113.57	40.8052	44.8424	63.2018	Gm7133
ENSMUST00000000153	38.5236	1.11214	0.357508	3.11082	0.0018657	0.0179243	56.6395	49.9793	51.7879	24.4831	19.0819	29.1701	Gna12
ENSMUST00000097830	156.703	1.11741	0.185907	6.01054	1.85e-09	4.95e-08	200.504	198.698	244.403	99.9728	89.6848	106.957	Otud3
ENSMUST00000135883	33.8143	1.11922	0.390471	2.86634	0.00415247	0.0350543	41.9132	40.2273	56.3307	19.3825	27.6687	17.3631	Arl4aos
ENSMUST00000047526	31.1533	1.12025	0.40017	2.79944	0.00511914	0.0418097	40.7805	43.8843	43.6109	13.2617	23.8523	21.5303	Asap3
ENSMUST00000020383	156.384	1.12179	0.210919	5.31857	1.05e-07	2.38e-06	181.246	179.194	281.654	89.7715	107.813	98.6226	Atp8b3
ENSMUST00000034109	89.9283	1.12332	0.262494	4.27942	1.87e-05	0.000309764	103.084	131.653	136.284	40.8052	53.4293	74.3142	1700011L22Rik
ENSMUST00000034775	462.994	1.12351	0.111215	10.1021	5.41e-24	3.08e-22	594.715	685.082	625.089	291.757	283.366	297.951	Fem1b
ENSMUST00000175355	240.608	1.12415	0.159143	7.06377	1.62e-12	5.44e-11	338.704	286.467	362.516	156.08	167.921	131.96	Mir3968
ENSMUST00000143103	33.3903	1.12542	0.399623	2.81621	0.00485936	0.0400372	45.3116	34.1322	58.1479	16.3221	20.036	26.392	Cdk19os
ENSMUST00000100399	1729.6	1.12806	0.0727759	15.5005	3.44e-54	3.41e-52	2298.43	2583.08	2238.69	1106.84	1096.25	1054.29	Xrcc6
ENSMUST00000195799	31.4979	1.12919	0.391286	2.88584	0.00390365	0.0333918	38.5149	40.2273	50.8794	20.4026	18.1278	20.8358	4933431K14Rik
ENSMUST00000023213	39.8247	1.13173	0.348091	3.25124	0.00114903	0.0118933	53.2411	52.4173	58.1479	29.5838	21.9442	23.6139	Hgh1
ENSMUST00000143380	70.5881	1.13367	0.278718	4.06743	4.75e-05	0.000719931	105.35	81.6735	103.576	55.0871	33.3933	44.4496	Aldh3b2
ENSMUST00000153148	68.4379	1.13444	0.26617	4.2621	2.03e-05	0.000330538	101.951	95.0826	85.4047	40.8052	42.9342	44.4496	Wdr54
ENSMUST00000211289	46.1287	1.13876	0.330251	3.44817	0.000564401	0.00659043	53.2411	65.8264	70.8677	34.6844	25.7605	26.392	Acsl1
ENSMUST00000171424	56.946	1.13921	0.297363	3.83103	0.000127609	0.00174072	90.6232	70.7025	73.5934	40.8052	30.531	35.4208	Kdm1a
ENSMUST00000209921	109.677	1.1396	0.228916	4.97823	6.42e-07	1.3e-05	176.715	154.814	120.839	77.5299	67.7407	60.4237	Gm8096
ENSMUST00000132184	973.66	1.14289	0.082136	13.9146	5.16e-44	4.32e-42	1357.08	1403.08	1262.9	589.635	612.528	616.739	Gm16153
ENSMUST00000025635	236.272	1.14424	0.153697	7.44478	9.71e-14	3.48e-12	301.322	323.037	351.613	130.577	163.15	147.934	Ms4a20
ENSMUST00000106875	566.813	1.15098	0.101038	11.3916	4.61e-30	3.08e-28	774.829	769.194	799.533	343.784	378.775	334.761	Limd2
ENSMUST00000212295	75.3306	1.15239	0.258508	4.45787	8.28e-06	0.000145484	103.084	99.9587	109.027	48.9663	38.1638	52.7839	1700061N14Rik
ENSMUST00000020662	62.1729	1.15731	0.282622	4.0949	4.22e-05	0.000646322	91.756	92.6446	73.5934	38.765	35.3015	40.977	Kremen1
ENSMUST00000008582	79.4052	1.15757	0.267579	4.32607	1.52e-05	0.000255028	104.217	117.025	109.027	40.8052	40.0719	65.2854	Adam21
ENSMUST00000204342	369.648	1.15763	0.119015	9.72674	2.32e-22	1.26e-20	501.826	511.983	517.879	218.308	236.615	231.277	Capza3
ENSMUST00000063317	77.0455	1.15792	0.269967	4.28911	1.79e-05	0.000297514	132.536	93.8636	93.5817	38.765	48.6588	54.8675	Adam6b
ENSMUST00000082237	67.7941	1.15962	0.275367	4.21117	2.54e-05	0.000408824	90.6232	85.3306	105.393	40.8052	35.3015	49.3113	Mex3b
ENSMUST00000040461	139.59	1.1621	0.202522	5.73814	9.57e-09	2.4e-07	189.176	177.975	210.786	106.094	71.557	81.954	Flvcr2
ENSMUST00000080723	180.012	1.16471	0.168617	6.90742	4.94e-12	1.59e-10	246.948	234.05	266.208	105.073	109.721	118.069	Tax1bp1
ENSMUST00000047034	458.95	1.17013	0.131766	8.88037	6.66e-19	3.08e-17	539.208	638.76	729.574	268.294	260.468	317.398	Ttbk1
ENSMUST00000032920	68.236	1.17179	0.28943	4.04861	5.15e-05	0.000771258	113.279	70.7025	99.0331	38.765	51.5211	36.1153	Cdipt
ENSMUST00000155083	33.067	1.17618	0.382128	3.07797	0.00208414	0.0196362	41.9132	43.8843	51.7879	17.3422	21.9442	21.5303	Ppox
ENSMUST00000182010	3229.79	1.17949	0.291509	4.04615	5.21e-05	0.000777158	3380.25	4300.66	5763	1714.84	1725.96	2494.04
ENSMUST00000059555	76.5691	1.18079	0.260902	4.5258	6.02e-06	0.000107578	109.881	93.8636	115.387	47.9461	38.1638	54.173	Ube2q2
ENSMUST00000109099	222.679	1.18115	0.17005	6.94586	3.76e-12	1.22e-10	282.065	302.314	344.344	112.214	132.619	162.519	Atmin
ENSMUST00000135462	89.3856	1.18132	0.237106	4.98224	6.29e-07	1.28e-05	116.677	123.12	131.741	63.2481	51.5211	50.0058	Cacnb1
ENSMUST00000212439	54.8426	1.18289	0.330466	3.57947	0.00034429	0.00431367	75.897	76.7975	75.4105	48.9663	20.036	31.9482	Comp
ENSMUST00000209480	31.7214	1.1833	0.395421	2.9925	0.00276703	0.0249542	35.1165	48.7603	48.1537	17.3422	22.8983	18.0577	Ccnq-ps2
ENSMUST00000197048	33.7977	1.18361	0.37696	3.13987	0.00169023	0.0165002	41.9132	52.4173	46.3366	21.4227	21.9442	18.7522
ENSMUST00000062182	226.607	1.18381	0.158694	7.45974	8.67e-14	3.12e-12	321.712	305.971	317.996	132.617	120.216	161.13	Gm4787
ENSMUST00000160227	27.0866	1.18415	0.418989	2.8262	0.00471032	0.0390593	33.9837	37.7892	40.8852	18.3624	16.2196	15.2796	AI480526
ENSMUST00000133371	143.755	1.18541	0.193675	6.12058	9.32e-10	2.56e-08	222.027	193.822	182.621	99.9728	84.9144	79.1759	Stox1
ENSMUST00000018884	3426.72	1.18902	0.0539018	22.0589	7.85e-108	1.32e-105	4753.19	4785.83	4749.04	2144.31	2122.86	2005.1	Slc25a35
ENSMUST00000003659	270.583	1.1945	0.145256	8.2234	1.98e-16	8.08e-15	413.468	343.76	373.418	165.261	149.793	177.799	Comp
ENSMUST00000079545	33.6647	1.19777	0.384156	3.11792	0.00182132	0.0176461	44.1788	40.2273	56.3307	17.3422	20.9901	22.9193	St6galnac2
ENSMUST00000130418	72.8661	1.19783	0.265879	4.50516	6.63e-06	0.000117767	84.9593	113.368	106.302	38.765	48.6588	45.1442	Aldh1l1
ENSMUST00000180376	113.131	1.19794	0.21597	5.5468	2.91e-08	7.02e-07	166.52	157.252	149.004	79.5702	56.2915	70.1471	Fam193a
ENSMUST00000224870	371.557	1.2014	0.122104	9.83913	7.64e-23	4.23e-21	485.967	543.678	523.331	240.751	217.533	218.081	Gm47119
ENSMUST00000147359	103.327	1.20222	0.230088	5.22506	1.74e-07	3.86e-06	166.52	143.843	122.656	53.0468	65.8325	68.0635	4930403D09Rik
ENSMUST00000201951	301.756	1.2029	0.140378	8.56904	1.04e-17	4.44e-16	480.303	397.397	384.321	187.704	185.094	175.715	Gm42811
ENSMUST00000037877	94.047	1.20698	0.230097	5.24553	1.56e-07	3.49e-06	120.076	134.091	139.918	53.0468	55.3375	61.8128	Tcfl5
ENSMUST00000172483	120.836	1.2103	0.214185	5.65072	1.6e-08	3.94e-07	164.255	179.194	161.724	89.7715	69.6489	60.4237	Lncob1
ENSMUST00000217862	28.0992	1.21142	0.44118	2.74586	0.00603527	0.0475936	38.5149	49.9793	29.0739	16.3221	22.8983	11.8069	Gm48450
ENSMUST00000217414	141.669	1.21165	0.20227	5.99026	2.1e-09	5.56e-08	198.238	223.078	171.718	89.7715	96.3635	70.8416	Gm48127
ENSMUST00000078605	41.6592	1.21228	0.350014	3.46351	0.000533177	0.00628283	50.9756	54.8554	69.0506	20.4026	24.8064	29.8646	Tcp11x2
ENSMUST00000127052	31.2631	1.21237	0.392	3.09279	0.00198287	0.0188218	38.5149	45.1033	47.2451	18.3624	20.9901	17.3631	Igsf9
ENSMUST00000101395	48.2376	1.21582	0.344171	3.53259	0.000411507	0.00502741	67.9674	79.2355	55.4222	36.7247	18.1278	31.9482	Hoxa4
ENSMUST00000118379	27.5407	1.21887	0.431038	2.82776	0.00468754	0.0389017	37.3821	41.4463	37.251	10.2013	18.1278	20.8358	Gm4994
ENSMUST00000103024	59.482	1.21958	0.332563	3.66723	0.000245195	0.00316846	72.4986	98.7396	79.0447	18.3624	48.6588	39.588	Cep295nl
ENSMUST00000080368	139.628	1.21986	0.192186	6.34728	2.19e-10	6.45e-09	190.309	186.508	208.969	92.8319	74.4193	84.7321	Atp8a2
ENSMUST00000108504	133.549	1.22027	0.193625	6.30223	2.93e-10	8.51e-09	190.309	184.07	186.255	73.4494	88.7307	78.4814	Fbxo39
ENSMUST00000017911	39.8263	1.22153	0.357572	3.4162	0.000635025	0.00724266	52.1084	54.8554	59.965	20.4026	31.4851	20.1412	Spata25
ENSMUST00000226239	57.6941	1.22192	0.291505	4.19177	2.77e-05	0.000438881	80.4281	71.9215	89.9475	33.6643	33.3933	36.8099	Gm4419
ENSMUST00000203541	53.3481	1.22274	0.314891	3.88305	0.000103154	0.00143371	63.4363	88.9876	71.7763	37.7448	24.8064	33.3372	Rarres2
ENSMUST00000226908	50.0611	1.2269	0.331018	3.70643	0.000210198	0.00277187	71.3658	76.7975	62.6907	35.7046	19.0819	34.7263	Rnf139
ENSMUST00000180521	101.834	1.23334	0.244683	5.04056	4.64e-07	9.7e-06	138.2	134.091	155.364	54.0669	82.0521	47.2277	1810049J17Rik
ENSMUST00000121869	25.9205	1.24098	0.443805	2.79623	0.00517033	0.0421275	37.3821	30.4752	40.8852	20.4026	15.2655	11.1124	Dzip3
ENSMUST00000062684	114.327	1.24266	0.22373	5.5543	2.79e-08	6.74e-07	135.935	154.814	191.706	66.3085	60.1079	77.0923	Tmem64
ENSMUST00000119133	785.516	1.24294	0.0928274	13.3898	6.94e-41	5.5e-39	1041.03	1142.21	1127.52	508.025	456.057	438.246	1700064H15Rik
ENSMUST00000095079	485.574	1.24326	0.109776	11.3254	9.82e-30	6.48e-28	702.33	663.14	684.146	290.737	263.33	309.758	Actl7a
ENSMUST00000040261	48.422	1.24421	0.339024	3.66997	0.000242576	0.00314251	46.4444	74.3595	83.5875	26.5234	27.6687	31.9482	Macrod1
ENSMUST00000034465	36.1545	1.24585	0.38444	3.24068	0.00119245	0.0123056	53.2411	53.6364	45.428	30.6039	15.2655	18.7522	2810004N23Rik
ENSMUST00000181355	56.6753	1.24647	0.303744	4.10368	4.07e-05	0.000623186	81.5609	86.5496	70.8677	42.8455	27.6687	30.5591	Gm26588
ENSMUST00000187467	416.049	1.24651	0.118692	10.502	8.46e-26	5.03e-24	589.051	631.446	536.959	249.932	234.707	254.196	Ms4a14
ENSMUST00000115817	96.1784	1.24896	0.242295	5.15469	2.54e-07	5.5e-06	108.748	141.405	155.364	54.0669	66.7866	50.7004	Tpgs2
ENSMUST00000149237	160.204	1.2492	0.190045	6.57319	4.92e-11	1.51e-09	268.471	195.041	212.603	102.013	93.5012	89.5938	Gldnos
ENSMUST00000064016	88.5149	1.24982	0.251477	4.96993	6.7e-07	1.35e-05	131.404	103.616	138.101	47.9461	64.8784	45.1442	Gpr17
ENSMUST00000134652	48.6959	1.25055	0.344884	3.62602	0.000287828	0.00365066	64.5691	57.2934	84.4961	21.4227	24.8064	39.588	Ttc39d
ENSMUST00000053015	50.9687	1.25254	0.3131	4.00045	6.32e-05	0.000929323	83.8265	67.0454	64.5078	28.5637	33.3933	28.4755	Pcbp1
ENSMUST00000036720	126.369	1.25256	0.208993	5.99328	2.06e-09	5.47e-08	173.317	157.252	202.609	86.7111	66.7866	71.5361	Fkbpl
ENSMUST00000170317	129.237	1.25322	0.201673	6.21415	5.16e-10	1.45e-08	174.45	181.632	188.981	84.6708	81.098	64.5909	Gm17661
ENSMUST00000234781	183.626	1.25495	0.16492	7.60947	2.75e-14	1.02e-12	256.011	263.306	257.123	113.234	103.042	109.041	Gm50092
ENSMUST00000047206	194.849	1.2569	0.162206	7.74878	9.28e-15	3.5e-13	268.471	286.467	269.842	105.073	121.17	118.069	Plekhh2
ENSMUST00000134600	93.9707	1.25795	0.235204	5.34834	8.88e-08	2.04e-06	114.412	135.31	148.095	49.9864	56.2915	59.7292	Gm5577
ENSMUST00000156246	197.73	1.26069	0.179745	7.01378	2.32e-12	7.71e-11	331.908	224.297	280.745	122.416	106.859	120.153	Tmem82
ENSMUST00000182109	40.0624	1.26103	0.35323	3.56999	0.000357	0.00445666	52.1084	62.1694	55.4222	27.5435	18.1278	25.0029	Gm19557
ENSMUST00000207760	1158.74	1.26416	0.0810861	15.5903	8.48e-55	8.56e-53	1596.1	1598.12	1710.82	742.655	660.233	644.52	Gm38405
ENSMUST00000075764	96.8454	1.26465	0.260344	4.85761	1.19e-06	2.32e-05	154.059	154.814	101.759	44.8857	73.4652	52.0894	Drd2
ENSMUST00000001485	26.9271	1.26602	0.460775	2.74759	0.00600346	0.0474191	37.3821	31.6942	45.428	7.14091	19.0819	20.8358	Mrpl10
ENSMUST00000220066	34.1549	1.2675	0.379839	3.33695	0.000847036	0.00920214	50.9756	42.6653	50.8794	24.4831	17.1737	18.7522	4933412E12Rik
ENSMUST00000112305	326.693	1.27149	0.135705	9.36956	7.28e-21	3.7e-19	483.701	482.727	418.846	191.785	210.855	172.242	Ppm1b
ENSMUST00000132414	54.219	1.27478	0.312421	4.08033	4.5e-05	0.000685157	69.1002	64.6074	96.3074	32.6442	28.6228	34.0318	1700061F12Rik
ENSMUST00000218379	239.685	1.27742	0.148223	8.61824	6.8e-18	2.93e-16	330.775	343.76	342.527	154.04	136.435	130.571	Gm48768
ENSMUST00000188544	302.288	1.27928	0.142842	8.95588	3.37e-19	1.56e-17	476.905	387.645	418.846	172.402	197.497	160.435	Gm28178
ENSMUST00000021083	41.5892	1.28349	0.388277	3.30561	0.00094771	0.010125	41.9132	59.7314	75.4105	28.5637	13.3573	30.5591	Jpt1
ENSMUST00000119848	3164.46	1.28546	0.0637089	20.177	1.56e-90	2.23e-88	4520.97	4410.37	4526.45	1858.68	1982.61	1687.7	Eme2
ENSMUST00000131275	27.0132	1.28885	0.429967	2.99755	0.00272157	0.0246521	29.4525	42.6653	42.7023	18.3624	14.3114	14.585	Hoxb3os
ENSMUST00000200080	24.2904	1.29442	0.472033	2.74222	0.00610251	0.0480503	31.7181	41.4463	29.9825	21.4227	11.4491	9.72336	1700013M08Rik
ENSMUST00000020712	147.837	1.29575	0.192077	6.74598	1.52e-11	4.82e-10	186.91	208.45	235.317	83.6507	78.2357	94.4555	4921536K21Rik
ENSMUST00000046589	71.8944	1.30015	0.265482	4.8973	9.72e-07	1.91e-05	98.5528	113.368	94.4903	45.9059	42.9342	36.1153	Cst13
ENSMUST00000094481	40.7064	1.30188	0.362462	3.59178	0.000328425	0.00412997	50.9756	70.7025	52.6965	16.3221	25.7605	27.781	Fv1
ENSMUST00000020768	880.851	1.30534	0.0975135	13.3862	7.28e-41	5.72e-39	1170.17	1180	1412.81	473.341	513.303	535.479	Pgam2
ENSMUST00000149565	75.2013	1.30583	0.274245	4.76154	1.92e-06	3.67e-05	106.482	121.901	92.6732	37.7448	56.2915	36.1153	Agpat5
ENSMUST00000239043	116.637	1.30829	0.210125	6.22623	4.78e-10	1.35e-08	175.583	167.004	155.364	69.3689	73.4652	59.0347	Gm52991
ENSMUST00000071370	26.6685	1.30969	0.451546	2.90045	0.00372629	0.032061	41.9132	48.7603	23.6226	13.2617	17.1737	15.2796	Pcdh17
ENSMUST00000084763	47.4487	1.31104	0.332374	3.94446	8e-05	0.00113772	64.5691	59.7314	79.0447	23.463	23.8523	34.0318	Nlrp14
ENSMUST00000209382	115.029	1.3141	0.228816	5.74306	9.3e-09	2.34e-07	188.043	159.69	143.553	83.6507	61.062	54.173	Csnka2ip
ENSMUST00000138259	72.3456	1.31439	0.295439	4.44896	8.63e-06	0.000151135	115.545	113.368	79.9533	45.9059	51.5211	27.781	Gm15527
ENSMUST00000045736	610.116	1.31595	0.0996393	13.2071	7.98e-40	6.23e-38	832.601	865.496	914.012	326.442	364.464	357.681	Mroh2b
ENSMUST00000118139	75.6269	1.31608	0.267578	4.91848	8.72e-07	1.72e-05	103.084	102.397	119.021	39.7851	35.3015	54.173	Glt1d1
ENSMUST00000042172	104.755	1.31645	0.226447	5.81349	6.12e-09	1.56e-07	166.52	121.901	159.907	60.1877	58.1997	61.8128	Tmem247
ENSMUST00000080911	177.035	1.31721	0.190483	6.91507	4.68e-12	1.51e-10	258.276	223.078	275.294	128.536	83.9603	93.0664	C030014I23Rik
ENSMUST00000185283	37.0684	1.31986	0.384474	3.4329	0.000597152	0.00690244	46.4444	56.0744	56.3307	27.5435	12.4032	23.6139	1700126A01Rik
ENSMUST00000202688	161.32	1.31987	0.186116	7.09163	1.33e-12	4.47e-11	216.363	237.707	236.226	85.691	110.675	81.2595	Gm36840
ENSMUST00000198368	36.141	1.32011	0.38028	3.47142	0.000517711	0.00611457	47.5772	63.3884	43.6109	22.4429	23.8523	15.9741
ENSMUST00000028761	84.639	1.32198	0.242193	5.45838	4.8e-08	1.13e-06	122.341	125.558	115.387	42.8455	49.6129	52.0894	Ubox5
ENSMUST00000006403	27.9136	1.32289	0.433809	3.04948	0.0022924	0.021366	37.3821	47.5413	34.5253	14.2818	21.9442	11.8069	Ccdc159
ENSMUST00000147594	36.3701	1.32358	0.376086	3.51935	0.000432611	0.00524789	50.9756	46.3223	58.1479	27.5435	17.1737	18.0577	4930453O03Rik
ENSMUST00000002298	239.458	1.32714	0.167197	7.9376	2.06e-15	8.07e-14	303.588	347.417	376.144	111.194	165.058	133.349	Ppm1j
ENSMUST00000134250	49.064	1.32782	0.318832	4.16464	3.12e-05	0.000488098	72.4986	78.0165	59.965	29.5838	28.6228	25.6974	Gm16048
ENSMUST00000029080	50.9891	1.32789	0.308733	4.30109	1.7e-05	0.000283693	70.233	71.9215	76.3191	29.5838	31.4851	26.392	Cypt12
ENSMUST00000106770	123.284	1.32834	0.202611	6.55613	5.52e-11	1.69e-09	169.919	174.318	185.346	65.2884	67.7407	77.0923	Mroh7
ENSMUST00000236200	42.7767	1.32864	0.336815	3.9447	7.99e-05	0.00113772	55.5067	64.6074	63.5992	22.4429	24.8064	25.6974	Gm50373
ENSMUST00000036862	178.943	1.32864	0.169081	7.85803	3.9e-15	1.51e-13	259.409	260.868	247.128	103.033	108.767	94.4555	Cog5
ENSMUST00000027830	29.717	1.3344	0.407454	3.27497	0.00105674	0.0111282	41.9132	47.5413	38.1595	20.4026	14.3114	15.9741	Slamf9
ENSMUST00000160099	45.3132	1.33459	0.337657	3.95252	7.73e-05	0.0011062	70.233	69.4835	55.4222	19.3825	29.5769	27.781	AI480526
ENSMUST00000036226	922.758	1.33535	0.0932164	14.3252	1.52e-46	1.33e-44	1295.91	1293.37	1379.19	459.059	530.476	578.54	Fem1c
ENSMUST00000208082	144.319	1.33739	0.191586	6.98063	2.94e-12	9.64e-11	203.902	203.574	211.695	93.852	82.0521	70.8416	Gm45089
ENSMUST00000100757	281.213	1.3427	0.15194	8.83706	9.83e-19	4.48e-17	356.829	396.178	457.006	137.718	178.416	161.13	Adam1a
ENSMUST00000216929	36.7108	1.34384	0.379092	3.54488	0.000392787	0.00481585	62.3035	46.3223	49.9708	18.3624	16.2196	27.0865	Csrnp1
ENSMUST00000104979	85.6542	1.34599	0.244431	5.50664	3.66e-08	8.7e-07	120.076	140.186	109.027	46.926	47.7047	50.0058	Rnf148
ENSMUST00000220198	30.8257	1.34652	0.446174	3.01792	0.0025452	0.0233212	57.7723	46.3223	29.0739	9.18118	23.8523	18.7522	Gm48475
ENSMUST00000116172	149.07	1.35416	0.190744	7.09936	1.25e-12	4.25e-11	194.84	220.64	226.232	90.7916	89.6848	72.2307	Gm11175
ENSMUST00000065330	44.0281	1.35524	0.333686	4.06144	4.88e-05	0.000735418	61.1707	64.6074	64.5078	23.463	21.9442	28.4755	Clk3
ENSMUST00000172831	271.285	1.35723	0.140707	9.64585	5.12e-22	2.72e-20	401.008	380.33	389.772	160.161	137.39	159.046	Rgs22
ENSMUST00000059383	122.788	1.3602	0.235978	5.76409	8.21e-09	2.08e-07	167.653	154.814	208.969	60.1877	53.4293	91.6774	Fhl4
ENSMUST00000027299	143.681	1.36095	0.188458	7.22152	5.14e-13	1.79e-11	220.894	193.822	206.243	76.5098	79.1898	85.4266	Prss39
ENSMUST00000172856	57.2059	1.36137	0.32846	4.14471	3.4e-05	0.000530925	61.1707	74.3595	111.753	30.6039	25.7605	39.588	Znrf1
ENSMUST00000038956	54.0056	1.36207	0.306767	4.44007	8.99e-06	0.000157172	72.4986	76.7975	84.4961	25.5033	28.6228	36.1153	Lrrc18
ENSMUST00000238260	23.3846	1.36306	0.458733	2.97137	0.00296477	0.0265053	40.7805	29.2562	30.8911	13.2617	14.3114	11.8069	Gm17334
ENSMUST00000121418	267.361	1.36341	0.149497	9.12002	7.51e-20	3.68e-18	414.601	375.454	367.058	143.838	131.665	171.548	Rab3il1
ENSMUST00000148880	78.1079	1.36744	0.270519	5.05486	4.31e-07	9.05e-06	101.951	98.7396	136.284	39.7851	54.3834	37.5044	Rbbp6
ENSMUST00000124853	979.251	1.36791	0.0890963	15.3532	3.37e-53	3.28e-51	1437.51	1494.5	1301.06	578.414	559.099	504.92	Gm15856
ENSMUST00000002473	45.8271	1.36889	0.335559	4.07942	4.51e-05	0.000686813	60.0379	70.7025	67.2335	32.6442	20.036	24.3084	Babam1
ENSMUST00000172057	26.7757	1.36967	0.443757	3.08653	0.00202509	0.0191519	36.2493	40.2273	39.9767	11.2214	11.4491	21.5303	Ralgps2
ENSMUST00000107894	207.287	1.3703	0.190506	7.19295	6.34e-13	2.18e-11	287.729	299.876	307.093	158.12	99.2258	91.6774	Dgke
ENSMUST00000080594	36.6198	1.37157	0.393254	3.48774	0.000487125	0.00582007	41.9132	48.7603	68.142	13.2617	21.9442	25.6974	Irgc1
ENSMUST00000210714	268.843	1.37163	0.145699	9.41412	4.77e-21	2.43e-19	406.672	362.045	396.132	133.637	147.885	166.686	Spem3
ENSMUST00000044672	30.5724	1.37607	0.41716	3.29865	0.000971497	0.0103469	45.3116	30.4752	56.3307	19.3825	15.2655	16.6686	Cdk19
ENSMUST00000030134	141.641	1.37619	0.214983	6.40138	1.54e-10	4.6e-09	215.23	209.669	190.798	62.228	67.7407	104.179	Rad23b
ENSMUST00000195055	20.1705	1.37675	0.494378	2.78482	0.00535576	0.0434322	27.187	28.0372	31.7996	13.2617	12.4032	8.33431	Zmat3
ENSMUST00000116191	35.6309	1.37704	0.375495	3.66726	0.000245159	0.00316846	58.9051	53.6364	41.7938	20.4026	20.9901	18.0577	Gm15583
ENSMUST00000099427	31.1163	1.38586	0.406755	3.4071	0.000656565	0.00741444	48.71	51.1983	35.4339	13.2617	20.036	18.0577	Spata31d1c
ENSMUST00000191038	30.8107	1.38745	0.438639	3.16307	0.00156116	0.015472	32.8509	59.7314	41.7938	9.18118	19.0819	22.2248	1700120K04Rik
ENSMUST00000065753	41.2956	1.3879	0.351208	3.95178	7.76e-05	0.00110808	70.233	54.8554	54.5136	18.3624	24.8064	25.0029	Trp53rkb
ENSMUST00000125518	262.688	1.38814	0.153601	9.03729	1.61e-19	7.62e-18	420.265	353.512	365.241	170.362	135.481	131.265	Gm13563
ENSMUST00000141447	19.5306	1.39191	0.500946	2.77857	0.00545991	0.0441378	28.3198	32.9132	23.6226	10.2013	12.4032	9.72336	Ncor1
ENSMUST00000034822	23.6746	1.39494	0.458013	3.04563	0.00232194	0.0215827	35.1165	34.1322	33.6167	10.2013	17.1737	11.8069	Acsbg1
ENSMUST00000223523	99.8784	1.39563	0.23903	5.83872	5.26e-09	1.35e-07	149.528	168.223	116.296	58.1474	59.1538	47.9223	Gm47977
ENSMUST00000050864	68.5674	1.40031	0.278452	5.02892	4.93e-07	1.03e-05	94.0216	88.9876	115.387	40.8052	30.531	41.6715	Prm3
ENSMUST00000234072	76.1054	1.40389	0.262692	5.34422	9.08e-08	2.08e-06	111.013	101.178	119.021	48.9663	33.3933	43.0606	4930500A05Rik
ENSMUST00000174964	31.0887	1.40434	0.412058	3.40811	0.000654136	0.00741444	37.3821	43.8843	54.5136	13.2617	15.2655	22.2248
ENSMUST00000185351	101.23	1.40934	0.231821	6.07945	1.21e-09	3.29e-08	129.138	175.537	137.193	53.0468	53.4293	59.0347	1700008J07Rik
ENSMUST00000236556	37.3208	1.40963	0.360988	3.90492	9.43e-05	0.00131716	50.9756	57.2934	54.5136	18.3624	21.9442	20.8358	4930592I03Rik
ENSMUST00000080492	127.806	1.41336	0.201854	7.00188	2.53e-12	8.31e-11	167.653	195.041	195.34	66.3085	66.7866	75.7033	Rpl36
ENSMUST00000041500	28.0212	1.41747	0.462017	3.068	0.00215493	0.020176	23.7886	47.5413	50.8794	20.4026	9.54094	15.9741	Srxn1
ENSMUST00000121046	34.9713	1.41914	0.378617	3.74823	0.000178087	0.00238197	44.1788	53.6364	54.5136	22.4429	19.0819	15.9741	Tpt1-ps3
ENSMUST00000117522	24.1028	1.41938	0.462582	3.06838	0.0021522	0.0201688	31.7181	43.8843	29.9825	9.18118	15.2655	14.585	1700071K01Rik
ENSMUST00000061047	984.988	1.4197	0.105909	13.4049	5.66e-41	4.52e-39	1258.53	1336.03	1706.28	522.307	538.109	548.675	Phlpp1
ENSMUST00000033524	47.0135	1.42048	0.350921	4.04786	5.17e-05	0.000772629	60.0379	88.9876	57.2393	22.4429	20.036	33.3372	Ctag2
ENSMUST00000064762	19.1063	1.42312	0.518107	2.74677	0.00601852	0.0474979	24.9214	34.1322	24.5311	13.2617	6.67866	11.1124	Map1b
ENSMUST00000154285	30.4246	1.42526	0.408465	3.48931	0.000484264	0.0057926	43.046	47.5413	42.7023	18.3624	11.4491	19.4467	Gm13001
ENSMUST00000159950	32.6371	1.42595	0.389711	3.65899	0.000253214	0.00325981	46.4444	41.4463	54.5136	18.3624	19.0819	15.9741	Gm16226
ENSMUST00000115226	39.2023	1.42888	0.381895	3.74156	0.000182882	0.00243661	45.3116	68.2644	57.2393	28.5637	21.9442	13.8905	Bdh1
ENSMUST00000227540	5691.62	1.43466	0.0662976	21.6397	7.61e-104	1.24e-101	9061.19	8294.13	7570.12	3229.73	3104.62	2889.92	Tatdn1
ENSMUST00000100396	464.456	1.43473	0.11978	11.978	4.63e-33	3.27e-31	718.189	611.942	705.043	256.053	223.258	272.254	4930407I10Rik
ENSMUST00000208632	471.184	1.43501	0.115431	12.4317	1.76e-35	1.29e-33	715.924	685.082	660.523	277.476	262.376	225.721	Gm45236
ENSMUST00000136201	21.0132	1.43503	0.508854	2.82012	0.00480051	0.0396158	27.187	32.9132	31.7996	17.3422	5.72456	11.1124	C030037D09Rik
ENSMUST00000210682	696.344	1.43508	0.0954238	15.039	4.08e-51	3.89e-49	991.192	1014.21	1046.66	369.287	351.107	405.603	Nup98
ENSMUST00000221240	151.655	1.43519	0.206613	6.94624	3.75e-12	1.22e-10	259.409	238.926	166.267	82.6306	84.9144	77.7869	Kcnk10
ENSMUST00000225808	27.685	1.43554	0.431644	3.32574	0.000881846	0.00955009	33.9837	36.5702	50.8794	13.2617	13.3573	18.0577	Ttbk1
ENSMUST00000202722	45.4289	1.43562	0.346741	4.14032	3.47e-05	0.000539567	69.1002	74.3595	55.4222	32.6442	18.1278	22.9193	Ncbp2as2
ENSMUST00000043680	27.0548	1.43656	0.452752	3.17294	0.00150904	0.0150306	31.7181	41.4463	45.428	8.16104	20.9901	14.585	Tubg1
ENSMUST00000220343	29.6213	1.43656	0.412392	3.48347	0.000494953	0.00589991	40.7805	37.7892	50.8794	19.3825	14.3114	14.585	Gm48448
ENSMUST00000075995	354.714	1.43746	0.123479	11.6413	2.54e-31	1.72e-29	529.013	533.926	491.531	193.825	191.773	188.216	Cand2
ENSMUST00000145075	40.7992	1.43824	0.349085	4.12003	3.79e-05	0.000585809	54.3739	57.2934	67.2335	19.3825	22.8983	23.6139	Frmd5
ENSMUST00000018698	44.4213	1.44273	0.343235	4.20334	2.63e-05	0.000419955	58.9051	60.9504	74.5019	30.6039	20.036	21.5303	Ybx2
ENSMUST00000011029	1092.08	1.44532	0.0792774	18.2311	2.92e-74	3.5e-72	1542.86	1568.86	1679.02	580.454	609.666	571.595	Dnajc19
ENSMUST00000095267	180.037	1.44654	0.206205	7.01504	2.3e-12	7.66e-11	208.433	270.62	311.636	107.114	70.603	111.819	Jund
ENSMUST00000175955	17.4802	1.45048	0.527694	2.74871	0.00598298	0.0473262	23.7886	26.8182	26.3482	9.18118	7.63275	11.1124	Pou5f2
ENSMUST00000206389	94.8419	1.45236	0.233063	6.23159	4.62e-10	1.31e-08	144.997	124.339	147.187	46.926	56.2915	49.3113	Aqp11
ENSMUST00000050552	22.1113	1.45853	0.479814	3.03979	0.00236741	0.0219417	26.0542	29.2562	41.7938	13.2617	10.495	11.8069	Bzw1
ENSMUST00000155691	142.15	1.45889	0.199042	7.32959	2.31e-13	8.14e-12	203.902	187.727	233.5	84.6708	63.9243	79.1759	4933421O10Rik
ENSMUST00000093342	347.124	1.46008	0.129894	11.2406	2.58e-29	1.67e-27	488.233	507.107	533.325	162.201	194.635	197.245	4933402J07Rik
ENSMUST00000197455	1176.46	1.46132	0.0799892	18.2689	1.46e-74	1.82e-72	1718.44	1611.53	1846.19	626.36	640.197	616.044	Gm43412
ENSMUST00000093914	301.195	1.46635	0.141032	10.3973	2.55e-25	1.5e-23	428.195	401.054	496.982	153.02	168.875	159.046	Trim80
ENSMUST00000182467	188.737	1.46799	0.167392	8.76973	1.79e-18	7.99e-17	274.135	266.963	289.831	111.194	94.4553	95.8445	Gm6981
ENSMUST00000207942	69.0746	1.47151	0.283458	5.19129	2.09e-07	4.57e-06	120.076	98.7396	85.4047	44.8857	33.3933	31.9482	Gm31522
ENSMUST00000067976	19.6771	1.47193	0.501377	2.93578	0.00332712	0.0292372	30.5853	29.2562	27.2568	9.18118	8.58685	13.196	Ppp2r5a
ENSMUST00000054052	18.353	1.47754	0.521893	2.83111	0.00463864	0.0385892	21.523	29.2562	29.9825	11.2214	10.495	7.63978	Zfpm1
ENSMUST00000130785	21.5523	1.47786	0.48625	3.03931	0.00237121	0.0219417	27.187	31.6942	36.3424	13.2617	7.63275	13.196	Tex52
ENSMUST00000162837	65.3622	1.47983	0.287183	5.15291	2.56e-07	5.54e-06	106.482	87.7686	93.5817	39.7851	38.1638	26.392	Gm16271
ENSMUST00000180906	192.728	1.48053	0.164559	8.99697	2.32e-19	1.1e-17	300.189	264.525	286.196	104.053	102.088	99.3172	1110046J04Rik
ENSMUST00000232032	43.8139	1.48079	0.353003	4.19484	2.73e-05	0.000434675	56.6395	63.3884	72.6848	30.6039	22.8983	16.6686	Gm49796
ENSMUST00000084949	121.801	1.48112	0.227477	6.51106	7.46e-11	2.26e-09	148.396	177.975	212.603	52.0267	62.0161	77.7869	Bpnt2
ENSMUST00000020804	175.926	1.48141	0.196408	7.54252	4.61e-14	1.67e-12	262.807	252.335	264.391	72.4293	82.0521	121.542	Gdpd1
ENSMUST00000046513	27.5562	1.4823	0.43962	3.37178	0.000746838	0.00827062	38.5149	49.9793	33.6167	16.3221	9.54094	17.3631	Phyhipl
ENSMUST00000037947	22.9249	1.48235	0.509638	2.90863	0.00363015	0.0314176	45.3116	17.0661	39.0681	8.16104	13.3573	14.585	Mcl1
ENSMUST00000030950	138.445	1.48292	0.200543	7.3945	1.42e-13	5.04e-12	173.317	225.516	213.512	71.4091	67.7407	79.1759	Cptp
ENSMUST00000109554	17.4568	1.48399	0.537507	2.76088	0.00576462	0.0460946	29.4525	19.5041	28.1654	7.14091	11.4491	9.02883	Zc3h7b
ENSMUST00000199057	19.3464	1.48729	0.506283	2.93768	0.00330683	0.0291086	23.7886	31.6942	29.9825	9.18118	12.4032	9.02883	1700048F04Rik
ENSMUST00000019876	35.5545	1.49053	0.37563	3.96809	7.25e-05	0.00104361	50.9756	46.3223	59.965	16.3221	20.9901	18.7522	Calr3
ENSMUST00000221613	31.5506	1.49214	0.404814	3.68599	0.000227812	0.00296616	36.2493	53.6364	49.9708	13.2617	18.1278	18.0577	Odc1
ENSMUST00000038287	22.044	1.49542	0.482202	3.10123	0.00192719	0.0184048	29.4525	30.4752	37.251	15.302	11.4491	8.33431	Dusp5
ENSMUST00000072155	13596.1	1.4989	0.0485537	30.871	2.93e-209	1.31e-206	20040.2	20135.6	20072.8	7283.73	7385.64	6658.42	Ccdc189
ENSMUST00000236686	22.4959	1.49925	0.511232	2.93261	0.00336123	0.0293924	28.3198	30.4752	40.8852	5.10065	19.0819	11.1124	Gm50394
ENSMUST00000137239	757.756	1.50085	0.090125	16.653	2.88e-62	3.09e-60	1116.93	1119.05	1122.98	420.294	372.097	395.185	9530080O11Rik
ENSMUST00000018988	124.981	1.5014	0.211723	7.09133	1.33e-12	4.47e-11	216.363	164.566	173.535	58.1474	70.603	66.6745	Fndc8
ENSMUST00000023611	19.056	1.50219	0.509028	2.9511	0.0031664	0.027968	26.0542	30.4752	28.1654	10.2013	7.63275	11.8069	Adamts5
ENSMUST00000048893	383.957	1.50308	0.128975	11.654	2.19e-31	1.5e-29	516.552	600.971	586.93	200.966	177.461	220.859	1700013G24Rik
ENSMUST00000027339	18.5707	1.50382	0.534275	2.81469	0.00488248	0.0401314	23.7886	24.3802	34.5253	8.16104	6.67866	13.8905	Smap1
ENSMUST00000087328	43.9482	1.50522	0.351895	4.27746	1.89e-05	0.000312005	72.4986	64.6074	57.2393	28.5637	24.8064	15.9741	Hspa1a
ENSMUST00000041758	60.8535	1.50942	0.305412	4.94224	7.72e-07	1.53e-05	87.2249	82.8925	100.85	29.5838	22.8983	41.6715	Cypt2
ENSMUST00000097651	71.3037	1.51044	0.279222	5.40945	6.32e-08	1.47e-06	99.6856	113.368	104.484	25.5033	41.026	43.7551	Nol4
ENSMUST00000066949	179.814	1.51123	0.176323	8.57077	1.03e-17	4.39e-16	278.666	264.525	255.305	108.134	79.1898	93.0664	Zdhhc25
ENSMUST00000170137	56.6727	1.51128	0.320012	4.72257	2.33e-06	4.36e-05	75.897	74.3595	101.759	19.3825	35.3015	33.3372	Arl1
ENSMUST00000187304	51.7217	1.51134	0.31762	4.75832	1.95e-06	3.72e-05	72.4986	69.4835	88.1303	23.463	24.8064	31.9482	Prr30
ENSMUST00000139161	775.697	1.51612	0.100723	15.0524	3.33e-51	3.2e-49	1085.21	1183.66	1175.68	429.475	432.205	347.957	Ntan1
ENSMUST00000130349	32.3838	1.51667	0.42108	3.60185	0.00031596	0.00398295	50.9756	47.5413	46.3366	9.18118	15.2655	25.0029	Prdx4
ENSMUST00000053743	107.249	1.51722	0.22109	6.86247	6.77e-12	2.16e-10	169.919	148.719	158.998	48.9663	54.3834	62.5073	Ubqln5
ENSMUST00000038928	1036.98	1.51725	0.0793978	19.1094	2.11e-81	2.82e-79	1531.53	1522.54	1559.09	516.186	528.568	563.955	H1f9
ENSMUST00000004920	31.5038	1.51854	0.441757	3.43751	0.000587091	0.0068039	48.71	34.1322	57.2393	8.16104	24.8064	15.9741	Ulk2
ENSMUST00000205694	147.366	1.52016	0.195078	7.79256	6.57e-15	2.5e-13	188.043	226.735	239.86	81.6104	79.1898	68.758	Rnf40
ENSMUST00000108385	367.42	1.52363	0.123598	12.3273	6.46e-35	4.72e-33	550.536	519.297	564.216	199.946	192.727	177.799	Cyp2t4
ENSMUST00000031967	123.601	1.52409	0.209685	7.26851	3.63e-13	1.27e-11	183.512	176.756	190.798	51.0065	68.6948	70.8416	Prss37
ENSMUST00000008537	135.063	1.52499	0.204867	7.44383	9.78e-14	3.5e-12	173.317	231.612	196.249	67.3286	77.2816	64.5909	Carhsp1
ENSMUST00000173680	30.009	1.52885	0.419619	3.64343	0.00026903	0.00343339	49.8428	51.1983	32.7082	18.3624	13.3573	14.585	Gm20481
ENSMUST00000150375	216.949	1.52997	0.166232	9.20386	3.45e-20	1.73e-18	275.268	357.169	335.259	109.154	103.996	120.847	Gm13563
ENSMUST00000134197	23.7714	1.53017	0.477302	3.20588	0.00134648	0.0136356	45.3116	23.1612	37.251	11.2214	15.2655	10.4179	Arl9
ENSMUST00000064571	39.0604	1.53422	0.360717	4.25325	2.11e-05	0.000342257	50.9756	59.7314	63.5992	16.3221	22.8983	20.8358	Afap1
ENSMUST00000038166	798.753	1.53946	0.0901736	17.0722	2.39e-65	2.65e-63	1161.11	1225.1	1178.4	398.871	440.791	388.24	Dhx57
ENSMUST00000216909	352.453	1.54072	0.136764	11.2656	1.94e-29	1.27e-27	570.926	544.897	457.914	199.946	166.012	175.02	Map7
ENSMUST00000071308	185.437	1.54713	0.170133	9.09364	9.58e-20	4.65e-18	252.612	288.905	288.014	90.7916	91.593	100.706	Semp2l2a
ENSMUST00000033899	27.1197	1.54989	0.439559	3.52601	0.00042187	0.00513574	39.6477	40.2273	41.7938	8.16104	16.2196	16.6686	Col4a2
ENSMUST00000143191	60.2926	1.55334	0.297278	5.22522	1.74e-07	3.86e-06	89.4904	101.178	79.9533	28.5637	25.7605	36.8099	Gm14424
ENSMUST00000031900	299.722	1.55631	0.145973	10.6616	1.54e-26	9.38e-25	398.742	462.004	482.446	129.557	160.288	165.297	Llcfc1
ENSMUST00000201180	230.888	1.56335	0.159402	9.8076	1.04e-22	5.75e-21	327.376	368.14	337.984	131.597	120.216	100.012	Gm34411
ENSMUST00000186472	38.8881	1.56623	0.380662	4.11449	3.88e-05	0.000599163	67.9674	41.4463	65.4163	16.3221	17.1737	25.0029	1810044D09Rik
ENSMUST00000032233	448.979	1.56903	0.115938	13.5333	9.94e-42	8e-40	635.495	681.425	699.591	214.227	216.579	246.557	Tuba8
ENSMUST00000043415	38.9358	1.5736	0.37778	4.16538	3.11e-05	0.000487264	56.6395	57.2934	60.8735	26.5234	11.4491	20.8358	Tekt5
ENSMUST00000051907	1241.92	1.57574	0.0917944	17.166	4.77e-66	5.34e-64	1716.18	1733.43	2128.76	640.642	596.309	636.185	Spata21
ENSMUST00000219868	67.4446	1.57647	0.290007	5.43598	5.45e-08	1.28e-06	120.076	91.4256	91.7646	39.7851	24.8064	36.8099	Gm47367
ENSMUST00000203544	38.9184	1.57772	0.3764	4.1916	2.77e-05	0.000438881	50.9756	56.0744	68.142	12.2416	23.8523	22.2248	Igf2bp3
ENSMUST00000029355	44.4154	1.57859	0.369543	4.27174	1.94e-05	0.000318966	49.8428	80.4545	69.0506	17.3422	32.4392	17.3631	Ppm1l
ENSMUST00000132824	21.3672	1.57881	0.52804	2.98995	0.00279022	0.0250755	27.187	21.9421	46.3366	11.2214	15.2655	6.25073	1700037C06Rik
ENSMUST00000181395	18.5784	1.57905	0.53326	2.96112	0.00306523	0.0272615	31.7181	20.7231	30.8911	7.14091	13.3573	7.63978	Gm4673
ENSMUST00000084501	50.3685	1.5792	0.332623	4.74771	2.06e-06	3.9e-05	71.3658	80.4545	74.5019	18.3624	35.3015	22.2248	Pappa
ENSMUST00000212288	49.1514	1.57955	0.330694	4.77649	1.78e-06	3.42e-05	77.0297	79.2355	65.4163	17.3422	26.7146	29.1701	Gm20163
ENSMUST00000094215	39.685	1.58503	0.368666	4.29936	1.71e-05	0.000285459	50.9756	67.0454	59.965	25.5033	20.036	14.585	Mesd
ENSMUST00000049294	302.761	1.58944	0.142604	11.1458	7.5e-29	4.77e-27	462.178	435.186	465.183	136.697	178.416	138.905	Snrpd2
ENSMUST00000168863	32.7772	1.58971	0.399775	3.97651	6.99e-05	0.00101443	55.5067	49.9793	42.7023	14.2818	13.3573	20.8358	Trabd
ENSMUST00000216224	149.159	1.59097	0.194856	8.16484	3.22e-16	1.31e-14	209.566	229.174	233.5	60.1877	86.8226	75.7033	Usp44
ENSMUST00000186777	121.227	1.59105	0.204968	7.76239	8.33e-15	3.16e-13	175.583	187.727	182.621	59.1676	63.9243	58.3401	Pfkfb2
ENSMUST00000017348	33.4813	1.59899	0.407262	3.92619	8.63e-05	0.00121756	57.7723	40.2273	52.6965	23.463	11.4491	15.2796	Gsdma
ENSMUST00000172364	43.5172	1.6083	0.367026	4.38196	1.18e-05	0.000200881	44.1788	79.2355	72.6848	24.4831	23.8523	16.6686	Gm9252
ENSMUST00000023089	110.119	1.60865	0.218516	7.36169	1.82e-13	6.43e-12	165.387	168.223	164.449	57.1273	45.7965	59.7292	Wbp2nl
ENSMUST00000113980	85.4895	1.6091	0.252003	6.38523	1.71e-10	5.08e-09	125.74	120.682	139.918	33.6643	50.567	42.3661	M1ap
ENSMUST00000103184	111.617	1.61121	0.24024	6.70666	1.99e-11	6.27e-10	200.504	149.938	155.364	38.765	59.1538	65.9799	Adra1d
ENSMUST00000165413	185.63	1.61607	0.170253	9.49219	2.26e-21	1.18e-19	266.206	288.905	284.379	100.993	83.0062	90.2883	Stk35
ENSMUST00000189534	179.953	1.61661	0.179946	8.98388	2.61e-19	1.23e-17	291.127	265.744	257.123	104.053	73.4652	88.2047	Pfkfb2
ENSMUST00000046404	309.117	1.62023	0.14453	11.2103	3.63e-29	2.34e-27	440.655	454.69	506.068	131.597	145.976	175.715	Ubr7
ENSMUST00000212436	2060.11	1.62078	0.0715903	22.6396	1.76e-113	3.19e-111	2903.34	3104.81	3319.88	1039.51	946.461	1046.65	Iqcn
ENSMUST00000036904	731.547	1.621	0.118235	13.71	8.85e-43	7.23e-41	1135.06	1076.38	1105.72	324.402	305.31	442.413	Rnf139
ENSMUST00000211180	2052.71	1.62551	0.0726766	22.3664	8.37e-111	1.46e-108	3169.55	3305.95	2825.62	1029.31	1021.83	964.001	Lamtor1
ENSMUST00000218594	21.176	1.62643	0.510459	3.18621	0.00144148	0.0144696	20.3902	43.8843	31.7996	8.16104	12.4032	10.4179	Gm47257
ENSMUST00000186300	75.2074	1.63272	0.277256	5.88884	3.89e-09	1.01e-07	122.341	119.463	99.9416	25.5033	45.7965	38.1989	Gm28932
ENSMUST00000062156	39.4494	1.6336	0.416489	3.92231	8.77e-05	0.00123398	73.6314	76.7975	29.0739	16.3221	20.036	20.8358	Gm9795
ENSMUST00000115987	45.9658	1.63552	0.347891	4.70125	2.59e-06	4.8e-05	53.2411	82.8925	72.6848	17.3422	26.7146	22.9193	Gm4984
ENSMUST00000174651	710.793	1.64578	0.116036	14.1834	1.16e-45	9.96e-44	881.311	1144.65	1204.75	340.724	360.648	332.678	Gm20604
ENSMUST00000227616	14.0843	1.64652	0.598942	2.74905	0.00597685	0.0473262	20.3902	24.3802	19.0798	8.16104	7.63275	4.86168	Gm49172
ENSMUST00000231324	731.579	1.64679	0.118358	13.9136	5.24e-44	4.35e-42	1244.94	1189.75	893.115	369.287	344.428	347.957	4930542D17Rik
ENSMUST00000036493	18.1682	1.64994	0.527354	3.12871	0.00175577	0.0170914	29.4525	28.0372	25.4397	6.12078	9.54094	10.4179	Atp1a1
ENSMUST00000038791	86.2339	1.65368	0.246804	6.70037	2.08e-11	6.53e-10	134.802	119.463	138.101	37.7448	47.7047	39.588	Gde1
ENSMUST00000205324	1360.82	1.65497	0.0726797	22.7708	8.93e-115	1.67e-112	2096.79	2106.45	1993.38	682.467	639.243	646.603	Tlcd3b
ENSMUST00000146114	44.2508	1.65678	0.347199	4.77184	1.83e-06	3.49e-05	57.7723	62.1694	81.7704	20.4026	19.0819	24.3084	Chn2
ENSMUST00000047630	69.8204	1.66094	0.278307	5.96801	2.4e-09	6.34e-08	126.873	92.6446	99.0331	30.6039	34.3474	35.4208	Actrt3
ENSMUST00000161014	50.4615	1.66237	0.377077	4.40858	1.04e-05	0.000179201	70.233	90.2066	69.0506	18.3624	41.026	13.8905	Rrnad1
ENSMUST00000211380	163.728	1.66252	0.190592	8.72292	2.71e-18	1.2e-16	219.761	238.926	288.014	80.5903	69.6489	85.4266	Gm11175
ENSMUST00000008036	216.544	1.66438	0.171636	9.69712	3.1e-22	1.66e-20	313.783	324.256	351.613	92.8319	89.6848	127.098	Rplp1
ENSMUST00000149804	43.6808	1.66479	0.399328	4.16899	3.06e-05	0.000481079	88.3576	74.3595	37.251	13.2617	23.8523	25.0029	Cdc42se1
ENSMUST00000062356	27.9995	1.66548	0.422658	3.94048	8.13e-05	0.00115199	41.9132	41.4463	44.5195	11.2214	14.3114	14.585	Marcksl1
ENSMUST00000061260	77.4378	1.66579	0.269497	6.1811	6.37e-10	1.78e-08	133.669	109.711	109.027	44.8857	38.1638	29.1701	Fat4
ENSMUST00000001599	561.204	1.67074	0.1049	15.927	4.12e-57	4.28e-55	847.327	892.314	824.973	263.194	251.881	287.534	Klhl10
ENSMUST00000108593	22.0843	1.67159	0.487363	3.42986	0.00060389	0.00697249	23.7886	39.0083	38.1595	10.2013	9.54094	11.8069	Ctdnep1
ENSMUST00000007865	49.0756	1.6727	0.373659	4.47654	7.59e-06	0.000134013	52.1084	67.0454	105.393	14.2818	25.7605	29.8646	Ccdc124
ENSMUST00000164622	18.5612	1.67604	0.516951	3.24215	0.00118629	0.0122544	27.187	26.8182	30.8911	8.16104	8.58685	9.72336	Gm17187
ENSMUST00000218152	29.9598	1.67748	0.425039	3.94666	7.92e-05	0.00113046	49.8428	37.7892	49.0623	11.2214	20.036	11.8069	Gm48451
ENSMUST00000028740	15.5258	1.67772	0.609339	2.75335	0.00589897	0.0468777	36.2493	19.5041	15.4455	4.08052	9.54094	8.33431	Ttbk2
ENSMUST00000237332	50.1154	1.68115	0.323865	5.19089	2.09e-07	4.57e-06	81.5609	62.1694	85.4047	22.4429	24.8064	24.3084	Gm50166
ENSMUST00000071782	24.4731	1.68552	0.482369	3.49425	0.000475394	0.00569974	27.187	49.9793	34.5253	12.2416	15.2655	7.63978	Nptx2
ENSMUST00000125228	48.5586	1.68802	0.324335	5.20455	1.94e-07	4.28e-06	77.0297	79.2355	66.3249	23.463	20.9901	24.3084	Zfp60
ENSMUST00000194859	20.7743	1.69017	0.515614	3.27798	0.00104554	0.0110398	26.0542	25.5992	43.6109	10.2013	6.67866	12.5015	Gm38390
ENSMUST00000084366	338.316	1.69319	0.181837	9.31158	1.26e-20	6.36e-19	609.441	581.467	358.881	188.724	154.563	136.822	Osbpl9
ENSMUST00000156292	793.637	1.69619	0.0921154	18.4138	1.02e-75	1.29e-73	1218.88	1290.93	1130.25	367.247	378.775	375.738	Asb17os
ENSMUST00000146049	23.3641	1.70076	0.48833	3.48282	0.00049617	0.00590758	38.5149	36.5702	31.7996	9.18118	17.1737	6.94526	Gm14285
ENSMUST00000065797	19.6923	1.70185	0.512897	3.31812	0.000906264	0.00976333	24.9214	28.0372	37.251	8.16104	11.4491	8.33431	Chst1
ENSMUST00000119972	1082.81	1.70231	0.0982379	17.3285	2.87e-67	3.25e-65	1478.29	1633.47	1858.91	453.958	538.109	534.09	Dnajb3
ENSMUST00000111920	43.2032	1.71222	0.352673	4.85499	1.2e-06	2.34e-05	54.3739	62.1694	81.7704	21.4227	20.036	19.4467	Plekha3
ENSMUST00000123783	50.9694	1.71263	0.333114	5.14128	2.73e-07	5.87e-06	97.42	68.2644	68.142	26.5234	26.7146	18.7522	Syn3
ENSMUST00000222069	100.683	1.714	0.244404	7.01298	2.33e-12	7.73e-11	185.778	152.376	124.473	53.0468	46.7506	41.6715	5330409N07Rik
ENSMUST00000233325	1436.77	1.71434	0.0871001	19.6825	3.05e-86	4.19e-84	2451.36	2197.87	1957.04	692.669	684.085	637.574	Chaf1a
ENSMUST00000080123	1050.1	1.71599	0.0818146	20.9742	1.13e-97	1.74e-95	1548.52	1595.68	1686.29	501.904	464.644	503.531	Aldoart2
ENSMUST00000048945	18.6067	1.71759	0.548357	3.13224	0.00173476	0.0169189	38.5149	26.8182	19.9883	11.2214	9.54094	5.5562	Klk1b26
ENSMUST00000124489	126.761	1.71898	0.207837	8.27081	1.33e-16	5.5e-15	201.637	186.508	194.432	70.389	53.4293	54.173	Gm13605
ENSMUST00000061073	271.89	1.71912	0.147665	11.6421	2.52e-31	1.72e-29	418	440.062	395.224	110.174	126.894	140.989	Fbl-ps2
ENSMUST00000131410	15.5122	1.72171	0.592754	2.9046	0.0036772	0.0317182	15.8591	32.9132	22.714	5.10065	9.54094	6.94526	Zmat4
ENSMUST00000225788	67.0812	1.72458	0.295405	5.83802	5.28e-09	1.36e-07	92.8888	117.025	98.1245	39.7851	32.4392	22.2248	Gm47269
ENSMUST00000022890	70.2138	1.72546	0.275005	6.27427	3.51e-10	1.01e-08	108.748	103.616	111.753	30.6039	27.6687	38.8934	Rnf19a
ENSMUST00000076991	521.497	1.7272	0.122306	14.122	2.78e-45	2.37e-43	808.812	831.363	766.825	196.885	245.202	279.894	4930453N24Rik
ENSMUST00000004173	5446.07	1.73138	0.0497322	34.8141	1.49e-265	1.28e-262	8480.07	8127.13	8503.22	2502.38	2593.23	2470.43	Cdip1
ENSMUST00000057254	752.418	1.73528	0.0920282	18.8559	2.63e-79	3.38e-77	1125.99	1212.91	1134.79	333.583	345.382	361.848	Ubqln3
ENSMUST00000041965	14.4071	1.73675	0.603306	2.87872	0.00399298	0.0340147	19.2574	17.0661	29.9825	8.16104	5.72456	6.25073	Cdc42bpb
ENSMUST00000198978	61.761	1.73888	0.318808	5.45432	4.92e-08	1.16e-06	111.013	76.7975	96.3074	40.8052	24.8064	20.8358	Gm42839
ENSMUST00000028346	131.256	1.73962	0.20048	8.67728	4.05e-18	1.78e-16	202.769	199.917	202.609	66.3085	61.062	54.8675	Fam166a
ENSMUST00000225963	72.5065	1.74028	0.266763	6.52371	6.86e-11	2.08e-09	116.677	103.616	114.479	35.7046	30.531	34.0318	Zdhhc6
ENSMUST00000085614	43.3163	1.75814	0.346182	5.07865	3.8e-07	8.06e-06	69.1002	62.1694	69.0506	18.3624	23.8523	17.3631	Usp12
ENSMUST00000168292	294.132	1.76	0.14067	12.5115	6.46e-36	4.82e-34	432.726	479.07	449.737	149.959	126.894	126.404
ENSMUST00000185085	207.656	1.76466	0.164779	10.7093	9.21e-27	5.65e-25	292.26	351.074	318.905	98.9527	94.4553	90.2883
ENSMUST00000227506	37.7638	1.76507	0.373934	4.72028	2.36e-06	4.4e-05	53.2411	69.4835	52.6965	14.2818	18.1278	18.7522	Rai14
ENSMUST00000100370	63.3668	1.76693	0.298156	5.92619	3.1e-09	8.1e-08	89.4904	98.7396	106.302	28.5637	20.9901	36.1153	1700001L05Rik
ENSMUST00000081232	26.4178	1.76793	0.442365	3.99653	6.43e-05	0.000941671	37.3821	46.3223	39.0681	9.18118	13.3573	13.196	Plcg2
ENSMUST00000136591	42.2232	1.76968	0.368029	4.80854	1.52e-06	2.94e-05	54.3739	57.2934	84.4961	17.3422	16.2196	23.6139	Dnajc21
ENSMUST00000234897	20.3168	1.77143	0.524893	3.37485	0.000738571	0.0081967	28.3198	24.3802	41.7938	9.18118	5.72456	12.5015	Gm31759
ENSMUST00000087143	27.4667	1.77582	0.48873	3.63355	0.000279552	0.00355007	44.1788	24.3802	59.0564	6.12078	17.1737	13.8905	Eif1ax
ENSMUST00000038096	13.8809	1.77587	0.617561	2.87561	0.00403244	0.0342093	23.7886	23.1612	17.2626	9.18118	5.72456	4.16715	Fn3krp
ENSMUST00000148892	847.446	1.78142	0.0975231	18.2666	1.53e-74	1.87e-72	1449.97	1175.12	1314.69	365.207	384.5	395.185	BB031773
ENSMUST00000019726	24.3494	1.78299	0.483198	3.68998	0.000224269	0.00293115	30.5853	52.4173	29.9825	14.2818	10.495	8.33431	Plin3
ENSMUST00000166837	15.2232	1.78414	0.587012	3.03936	0.00237085	0.0219417	31.7181	18.2851	20.8969	6.12078	6.67866	7.63978	Gm17067
ENSMUST00000195710	176.284	1.78624	0.175166	10.1974	2.04e-24	1.18e-22	285.463	262.087	271.66	81.6104	83.9603	72.9252	Gm38342
ENSMUST00000051754	49.2107	1.78677	0.329424	5.42393	5.83e-08	1.36e-06	64.5691	84.1116	79.9533	21.4227	25.7605	19.4467	Pcdhb3
ENSMUST00000149167	40.704	1.78693	0.368192	4.85324	1.21e-06	2.36e-05	47.5772	68.2644	73.5934	19.3825	15.2655	20.1412	Smim14
ENSMUST00000050236	19.6948	1.78754	0.521406	3.4283	0.000607371	0.00698918	31.7181	23.1612	36.3424	10.2013	10.495	6.25073	Txndc2
ENSMUST00000223375	32.4514	1.78781	0.402677	4.43981	9e-06	0.000157172	46.4444	58.5124	46.3366	11.2214	16.2196	15.9741	Tmed10
ENSMUST00000050003	21.7625	1.78843	0.51421	3.47801	0.000505146	0.00600058	35.1165	32.9132	33.6167	11.2214	3.81638	13.8905	1700001O22Rik
ENSMUST00000095129	41.4745	1.79069	0.350211	5.11318	3.17e-07	6.75e-06	62.3035	64.6074	66.3249	17.3422	18.1278	20.1412	Gm136
ENSMUST00000201886	13.9357	1.79106	0.636479	2.81401	0.00489284	0.0401845	24.9214	15.8471	24.5311	4.08052	3.81638	10.4179	4930428D20Rik
ENSMUST00000131345	9821.35	1.79118	0.0466443	38.4009	0	0	15239.4	14990.1	15484.6	4351.88	4594.92	4267.16	4933431E20Rik
ENSMUST00000211245	17.404	1.79524	0.589146	3.04719	0.00230991	0.0215097	30.5853	17.0661	33.6167	9.18118	2.86228	11.1124	Gm13539
ENSMUST00000224991	42.0786	1.79657	0.361225	4.97356	6.57e-07	1.33e-05	69.1002	68.2644	59.0564	21.4227	12.4032	22.2248	Gm48860
ENSMUST00000195512	3445.87	1.79676	0.0616887	29.1263	1.67e-186	6.14e-184	5629.97	5385.58	5036.15	1605.69	1547.54	1470.31	Gm37206
ENSMUST00000204964	210.702	1.7993	0.171741	10.4768	1.1e-25	6.53e-24	283.198	371.797	326.173	100.993	97.3176	84.7321	Gm44064
ENSMUST00000161447	58.9415	1.805	0.314046	5.74757	9.05e-09	2.28e-07	94.0216	82.8925	99.0331	19.3825	22.8983	35.4208	Gm15756
ENSMUST00000096314	160.039	1.80602	0.190771	9.46697	2.88e-21	1.49e-19	219.761	258.43	268.025	65.2884	82.0521	66.6745	Tex13a
ENSMUST00000073179	609.673	1.80941	0.108057	16.7449	6.17e-63	6.69e-61	908.498	934.979	1004.87	265.234	242.34	302.119	Ppp1r14bl
ENSMUST00000062439	243.36	1.81303	0.166498	10.8892	1.3e-27	8.05e-26	448.585	348.636	340.71	94.8721	110.675	116.68	Ccdc54
ENSMUST00000139769	156.176	1.81387	0.185809	9.762	1.64e-22	8.93e-21	248.081	252.335	229.866	63.2481	70.603	72.9252	Gm11981
ENSMUST00000239135	53.4894	1.81433	0.346415	5.23744	1.63e-07	3.63e-06	69.1002	74.3595	105.393	34.6844	20.036	17.3631	Gm31160
ENSMUST00000159359	15.3321	1.81475	0.587717	3.08779	0.00201652	0.0190883	28.3198	23.1612	19.9883	6.12078	9.54094	4.86168	Gpr39
ENSMUST00000196114	18.7089	1.81604	0.533887	3.40155	0.000670043	0.00752538	27.187	37.7892	22.714	8.16104	6.67866	9.72336	Gm4332
ENSMUST00000107456	32.0229	1.82016	0.402857	4.51814	6.24e-06	0.000111163	54.3739	49.9793	45.428	16.3221	11.4491	14.585	Fam174b
ENSMUST00000054636	109.45	1.82297	0.239816	7.60153	2.93e-14	1.07e-12	132.536	207.231	172.626	41.8254	52.4752	50.0058	Bag5
ENSMUST00000060251	47.4494	1.8321	0.350803	5.2226	1.76e-07	3.9e-06	64.5691	63.3884	93.5817	21.4227	25.7605	15.9741	Higd1a
ENSMUST00000034597	42.3084	1.83235	0.383208	4.78162	1.74e-06	3.35e-05	79.2953	54.8554	63.5992	14.2818	28.6228	13.196	Tmprss13
ENSMUST00000234562	31.2324	1.83319	0.434308	4.22095	2.43e-05	0.000392702	47.5772	46.3223	51.7879	22.4429	9.54094	9.72336	Gm7788
ENSMUST00000110504	47.7665	1.83342	0.378471	4.84429	1.27e-06	2.46e-05	106.482	67.0454	49.9708	28.5637	17.1737	17.3631	Sub1
ENSMUST00000111243	1664.48	1.83383	0.0788709	23.2511	1.39e-119	2.86e-117	2628.07	2422.17	2752.03	711.031	678.361	795.232	Atp1a4
ENSMUST00000206808	30.2857	1.83409	0.443311	4.13726	3.51e-05	0.000545992	60.0379	39.0083	43.6109	8.16104	11.4491	19.4467	1700095K22Rik
ENSMUST00000093791	20.9857	1.83707	0.611803	3.00272	0.00267583	0.0243233	52.1084	34.1322	11.8113	16.3221	6.67866	4.86168	Cep63
ENSMUST00000029738	521.274	1.83913	0.128091	14.358	9.49e-47	8.35e-45	802.016	806.983	831.333	250.952	258.559	177.799	Gpr89
ENSMUST00000042575	422.194	1.83939	0.116608	15.7741	4.69e-56	4.83e-54	681.94	661.921	636.901	180.563	182.232	189.605	Topors
ENSMUST00000031766	21.8957	1.84034	0.531506	3.46251	0.00053516	0.00629899	36.2493	39.0083	28.1654	8.16104	3.81638	15.9741	Asns
ENSMUST00000199224	62.231	1.84114	0.292376	6.29717	3.03e-10	8.77e-09	103.084	93.8636	94.4903	27.5435	31.4851	22.9193	Gm43353
ENSMUST00000033756	152.651	1.84378	0.190145	9.69669	3.11e-22	1.66e-20	240.152	224.297	252.58	59.1676	66.7866	72.9252	Asb9
ENSMUST00000045296	320.72	1.84595	0.155623	11.8617	1.87e-32	1.31e-30	410.07	519.297	576.936	120.375	146.93	150.712	Siah1a
ENSMUST00000061455	1573.63	1.84904	0.0909269	20.3354	6.25e-92	9.07e-90	2310.89	2369.75	2713.87	600.857	675.499	770.923	Tent5c
ENSMUST00000077991	35.2433	1.85082	0.402472	4.59861	4.25e-06	7.68e-05	57.7723	49.9793	58.1479	8.16104	20.036	17.3631	Gm5620
ENSMUST00000107381	25.217	1.8521	0.464824	3.98452	6.76e-05	0.000983646	45.3116	37.7892	35.4339	14.2818	6.67866	11.8069	Ttll13
ENSMUST00000165493	242.406	1.85539	0.151654	12.2343	2.04e-34	1.48e-32	393.078	355.95	389.772	111.194	103.042	101.401	Nsun4
ENSMUST00000219728	18.2328	1.85697	0.542481	3.42311	0.000619094	0.00709238	28.3198	30.4752	27.2568	4.08052	9.54094	9.72336	Mmp11
ENSMUST00000029650	38.8276	1.85895	0.374775	4.96016	7.04e-07	1.41e-05	53.2411	76.7975	52.6965	17.3422	16.2196	16.6686	Ints12
ENSMUST00000002914	3008.83	1.86066	0.0700534	26.5606	1.94e-155	5.12e-153	4465.46	4691.96	4992.54	1289.45	1419.69	1193.89	Chaf1a
ENSMUST00000231496	84.7186	1.86334	0.266102	7.00235	2.52e-12	8.31e-11	148.396	117.025	134.467	27.5435	34.3474	46.5332	4930570E03Rik
ENSMUST00000200982	68.7858	1.86553	0.28319	6.58756	4.47e-11	1.38e-09	99.6856	115.806	108.119	25.5033	37.2097	26.392	Gm42558
ENSMUST00000213783	33.9533	1.86623	0.420695	4.43606	9.16e-06	0.000159663	46.4444	56.0744	58.1479	12.2416	8.58685	22.2248	Gm8131
ENSMUST00000062824	13.8637	1.8714	0.622703	3.00529	0.00265326	0.0241395	15.8591	19.5041	29.9825	6.12078	4.77047	6.94526	Tmem53
ENSMUST00000085113	104.153	1.87778	0.230401	8.15006	3.64e-16	1.47e-14	176.715	168.223	147.187	40.8052	41.9801	50.0058	Iqcf5
ENSMUST00000147536	157.697	1.87944	0.20298	9.25922	2.06e-20	1.03e-18	248.081	223.078	273.477	73.4494	49.6129	78.4814	Pgap2
ENSMUST00000186414	118.285	1.88022	0.218143	8.61921	6.74e-18	2.92e-16	181.246	168.223	208.969	44.8857	51.5211	54.8675	Gm6652
ENSMUST00000137193	13.6867	1.88875	0.618504	3.05373	0.00226012	0.0211033	22.6558	21.9421	19.9883	8.16104	3.81638	5.5562	Gm15412
ENSMUST00000217388	27.3448	1.89079	0.456266	4.14405	3.41e-05	0.000531651	31.7181	39.0083	58.1479	14.2818	10.495	10.4179	1700019L13Rik
ENSMUST00000180609	349.926	1.89111	0.129321	14.6234	1.99e-48	1.85e-46	568.661	560.744	523.331	158.12	149.793	138.905	A330032B11Rik
ENSMUST00000203352	877.884	1.89318	0.104578	18.103	3.02e-73	3.53e-71	1448.84	1507.91	1192.03	392.75	385.454	340.318	4933406J09Rik
ENSMUST00000148729	170.099	1.90435	0.207427	9.18078	4.28e-20	2.12e-18	252.612	247.459	307.093	65.2884	54.3834	93.7609	Wbscr25
ENSMUST00000217950	14.9397	1.92096	0.588957	3.26163	0.00110774	0.0115122	24.9214	24.3802	21.8054	6.12078	4.77047	7.63978	4933411E08Rik
ENSMUST00000016106	39.2111	1.92108	0.383948	5.00348	5.63e-07	1.16e-05	49.8428	65.8264	70.8677	10.2013	19.0819	19.4467	1700016C15Rik
ENSMUST00000182910	40.8831	1.92524	0.380597	5.05847	4.23e-07	8.9e-06	62.3035	52.4173	79.9533	15.302	12.4032	22.9193	1700022A21Rik
ENSMUST00000226103	96.2489	1.92981	0.23867	8.08568	6.18e-16	2.47e-14	167.653	148.719	140.827	44.8857	37.2097	38.1989	Zdhhc6
ENSMUST00000220177	39.9757	1.93309	0.402945	4.7974	1.61e-06	3.11e-05	66.8346	74.3595	49.9708	8.16104	16.2196	24.3084	Gm47645
ENSMUST00000233133	12.6536	1.93477	0.690996	2.79997	0.00511071	0.0418097	14.7263	23.1612	21.8054	8.16104	6.67866	1.38905	Esp22
ENSMUST00000000421	667.662	1.93708	0.108124	17.9155	8.93e-72	1.03e-69	987.793	1014.21	1172.95	260.133	306.264	264.614	Tssk3
ENSMUST00000059466	34.3564	1.93883	0.391088	4.95752	7.14e-07	1.43e-05	47.5772	58.5124	57.2393	15.302	14.3114	13.196	Actrt1
ENSMUST00000053830	129.772	1.94392	0.202628	9.59354	8.51e-22	4.5e-20	206.168	204.793	207.152	55.0871	50.567	54.8675	Hmgb4
ENSMUST00000159637	48.2391	1.94444	0.349211	5.56808	2.58e-08	6.29e-07	99.6856	63.3884	66.3249	21.4227	21.9442	16.6686	AI480526
ENSMUST00000203602	66.887	1.94669	0.292524	6.65482	2.84e-11	8.88e-10	109.881	120.682	88.1303	32.6442	22.8983	27.0865	Gm8719
ENSMUST00000091364	15.5185	1.94843	0.588342	3.31174	0.000927181	0.00992623	21.523	19.5041	32.7082	7.14091	6.67866	5.5562	1700008P02Rik
ENSMUST00000096371	42.6386	1.94858	0.371344	5.24737	1.54e-07	3.47e-06	52.1084	74.3595	76.3191	15.302	23.8523	13.8905	Gm5941
ENSMUST00000191694	19.7814	1.95444	0.544596	3.5888	0.000332209	0.00417247	33.9837	28.0372	31.7996	14.2818	5.72456	4.86168	1700008A23Rik
ENSMUST00000215525	56.5886	1.95533	0.316256	6.18276	6.3e-10	1.76e-08	80.4281	97.5206	92.6732	16.3221	24.8064	27.781	4930517N10Rik
ENSMUST00000132201	26.6282	1.95534	0.459302	4.25719	2.07e-05	0.000337338	41.9132	47.5413	38.1595	6.12078	11.4491	14.585	Bcl2l11
ENSMUST00000043062	1341.27	1.95981	0.0806799	24.2912	2.43e-130	5.32e-128	2023.16	2117.42	2263.22	501.904	569.594	572.289	Acsbg2
ENSMUST00000125723	100.422	1.96794	0.245943	8.0016	1.23e-15	4.85e-14	129.138	182.851	167.175	42.8455	45.7965	34.7263	Zfp451
ENSMUST00000181716	13.9808	1.9705	0.623523	3.16027	0.00157623	0.0155495	15.8591	21.9421	29.0739	4.08052	6.67866	6.25073	Tspan18
ENSMUST00000141199	3802.41	1.97379	0.0609135	32.4031	2.48e-230	1.42e-227	6429.72	5981.67	5770.27	1619.97	1534.18	1478.64	Gm16325
ENSMUST00000180738	330.568	1.97428	0.138295	14.2759	3.09e-46	2.68e-44	560.731	543.678	476.086	132.617	145.976	124.32	Gm17529
ENSMUST00000110551	3865.47	1.97984	0.0767587	25.7931	1.06e-146	2.66e-144	5855.39	5832.95	6818.75	1460.83	1478.85	1746.04	Sord
ENSMUST00000107376	421.365	1.98294	0.136236	14.5552	5.41e-48	4.97e-46	624.167	689.959	703.226	201.986	134.527	174.326	Nkiras2
ENSMUST00000149414	14.3693	1.98509	0.620184	3.2008	0.00137045	0.0138375	24.9214	24.3802	19.9883	4.08052	3.81638	9.02883	Atp8a2
ENSMUST00000022537	109.93	1.99018	0.239512	8.30928	9.63e-17	4.01e-15	201.637	167.004	157.181	47.9461	52.4752	33.3372	Prss52
ENSMUST00000037330	11.6517	1.99033	0.711487	2.79742	0.0051512	0.0420382	11.3279	20.7231	23.6226	8.16104	1.90819	4.16715	Inha
ENSMUST00000052867	26.8994	1.99204	0.445723	4.46924	7.85e-06	0.000138434	36.2493	47.5413	45.428	9.18118	10.495	12.5015	Gm9843
ENSMUST00000052832	27.7405	2.00042	0.454764	4.39881	1.09e-05	0.000186214	47.5772	42.6653	43.6109	6.12078	10.495	15.9741	Micos13
ENSMUST00000186758	67.6253	2.0006	0.292191	6.84687	7.55e-12	2.41e-10	92.8888	108.492	123.564	28.5637	20.9901	31.2536	Tuba4a
ENSMUST00000233188	16.6568	2.00263	0.592898	3.3777	0.000730956	0.00812094	21.523	35.3512	22.714	10.2013	6.67866	3.47263	4930471L23Rik
ENSMUST00000063456	70.4116	2.00272	0.301164	6.64994	2.93e-11	9.12e-10	92.8888	132.872	112.661	18.3624	37.2097	28.4755	Tex37
ENSMUST00000169499	15.2967	2.00429	0.589055	3.40256	0.000667589	0.00750855	30.5853	21.9421	20.8969	6.12078	6.67866	5.5562	Gm14569
ENSMUST00000036951	908.002	2.00821	0.0962175	20.8715	9.72e-97	1.47e-94	1422.78	1420.14	1524.56	332.563	336.795	411.159	Pebp1
ENSMUST00000054425	21.7614	2.00926	0.590126	3.4048	0.000662133	0.00746912	44.1788	34.1322	27.2568	4.08052	2.86228	18.0577	H2bl1
ENSMUST00000122709	4369.46	2.01231	0.0669515	30.0563	1.81e-198	7.44e-196	6729.91	6993.45	7277.57	1822.97	1846.17	1546.71
ENSMUST00000221328	9.95066	2.01243	0.731355	2.75165	0.00592959	0.0470847	13.5935	13.4091	20.8969	4.08052	2.86228	4.86168	Nol8
ENSMUST00000154098	32.6576	2.01529	0.408434	4.93418	8.05e-07	1.59e-05	50.9756	45.1033	60.8735	15.302	10.495	13.196	Rnf181
ENSMUST00000022695	21.1843	2.01606	0.522381	3.85936	0.000113685	0.00156949	27.187	43.8843	30.8911	5.10065	12.4032	7.63978	Dmtn
ENSMUST00000179474	712.722	2.01656	0.110055	18.3232	5.4e-75	6.79e-73	1229.08	1134.9	1062.11	285.637	321.53	243.084	Fhip1b
ENSMUST00000156882	11.7907	2.01915	0.687566	2.93666	0.00331764	0.0291788	27.187	12.1901	17.2626	6.12078	3.81638	4.16715	Gm16170
ENSMUST00000063523	53.3708	2.01955	0.317109	6.36865	1.91e-10	5.63e-09	81.5609	82.8925	92.6732	20.4026	19.0819	23.6139	Prss58
ENSMUST00000238127	13.0615	2.02035	0.648738	3.11429	0.0018439	0.01781	21.523	15.8471	25.4397	7.14091	2.86228	5.5562	1700003O11Rik
ENSMUST00000222480	19.2702	2.02037	0.526214	3.83944	0.000123316	0.00168968	28.3198	32.9132	31.7996	7.14091	5.72456	9.72336	Noxred1
ENSMUST00000197711	35.7586	2.02794	0.41023	4.94342	7.68e-07	1.53e-05	64.5691	39.0083	68.142	18.3624	13.3573	11.1124	Dnajb14
ENSMUST00000060855	1402.34	2.02952	0.0734101	27.6463	3.09e-168	9.65e-166	2152.3	2320.99	2285.94	551.891	543.834	559.093	H1f7
ENSMUST00000057113	30.3241	2.03478	0.436488	4.66171	3.14e-06	5.72e-05	60.0379	40.2273	46.3366	7.14091	14.3114	13.8905	H2al3
ENSMUST00000055374	1380.69	2.03854	0.0846959	24.0689	5.29e-128	1.14e-125	2150.04	2106.45	2408.59	529.448	499.945	589.652	Tssk2
ENSMUST00000226043	18.8059	2.0392	0.53228	3.83107	0.00012759	0.00174072	29.4525	32.9132	28.1654	8.16104	8.58685	5.5562	1700084D21Rik
ENSMUST00000138729	57.238	2.04292	0.320453	6.37509	1.83e-10	5.41e-09	78.1625	84.1116	113.57	21.4227	26.7146	19.4467	1700021J08Rik
ENSMUST00000039146	11.473	2.0464	0.746727	2.7405	0.00613463	0.0482663	15.8591	14.6281	25.4397	1.02013	2.86228	9.02883	Tex19.2
ENSMUST00000040008	56.0073	2.05027	0.323784	6.33222	2.42e-10	7.07e-09	82.6937	81.6735	105.393	25.5033	24.8064	15.9741	Ube2r2
ENSMUST00000149469	53.3167	2.05114	0.327517	6.26269	3.78e-10	1.08e-08	73.6314	81.6735	101.759	24.4831	20.9901	17.3631	Spata3
ENSMUST00000193614	110.198	2.0514	0.228734	8.96849	3.01e-19	1.4e-17	189.176	184.07	158.998	41.8254	49.6129	37.5044	E330011M16Rik
ENSMUST00000062990	1026.55	2.06194	0.0822487	25.0695	1.07e-138	2.45e-136	1580.24	1699.3	1689.92	394.791	394.995	400.047	Slfnl1
ENSMUST00000127074	23.4117	2.0658	0.490721	4.20972	2.56e-05	0.000410177	31.7181	43.8843	38.1595	5.10065	10.495	11.1124	Slfn5os
ENSMUST00000070659	237.814	2.07196	0.163369	12.6827	7.38e-37	5.55e-35	347.767	368.14	437.018	91.8118	84.9144	97.2336	1700001K19Rik
ENSMUST00000136979	32.5196	2.07473	0.409483	5.06671	4.05e-07	8.56e-06	55.5067	51.1983	50.8794	10.2013	16.2196	11.1124	Shank2
ENSMUST00000129353	1350.51	2.07497	0.0797217	26.0276	2.41e-149	6.21e-147	2179.49	2196.65	2167.82	568.213	519.981	470.888	1700112J05Rik
ENSMUST00000225619	206.337	2.07785	0.175211	11.8591	1.93e-32	1.34e-30	357.962	291.343	352.521	67.3286	82.0521	86.8157	Etohd2
ENSMUST00000121384	19.3526	2.07908	0.53378	3.89501	9.82e-05	0.00136848	28.3198	25.5992	39.9767	8.16104	5.72456	8.33431	Gm12403
ENSMUST00000195134	161.939	2.07963	0.186535	11.1488	7.26e-29	4.65e-27	258.276	268.182	259.848	64.2682	54.3834	66.6745	Gm37915
ENSMUST00000174088	1025.63	2.08004	0.0963301	21.5929	2.1e-103	3.37e-101	1545.13	1601.78	1832.57	370.307	369.234	434.773	Actl9
ENSMUST00000064476	41.2429	2.08288	0.374698	5.55883	2.72e-08	6.6e-07	60.0379	59.7314	80.8619	14.2818	12.4032	20.1412	Arl13a
ENSMUST00000059833	700.663	2.08508	0.134122	15.5461	1.69e-54	1.69e-52	1159.98	1011.78	1234.73	231.57	224.212	341.707	Fscb
ENSMUST00000105350	2595.52	2.08809	0.0838482	24.9032	6.87e-137	1.54e-134	3799.38	4084.9	4724.51	884.453	1063.81	1016.09	Mex3d
ENSMUST00000139408	10.0331	2.09942	0.745805	2.81497	0.00487812	0.0401276	15.8591	10.9711	21.8054	3.06039	5.72456	2.7781	Gm10157
ENSMUST00000173207	9.64595	2.09956	0.76778	2.73459	0.00624586	0.0488058	9.06232	17.0661	20.8969	4.08052	1.90819	4.86168	Ly6g6c
ENSMUST00000050658	1535.73	2.1006	0.0768279	27.3417	1.36e-164	3.99e-162	2558.97	2474.59	2444.03	538.629	561.961	636.185	Spz1
ENSMUST00000131790	38.0882	2.10261	0.384177	5.47303	4.42e-08	1.05e-06	60.0379	54.8554	70.8677	13.2617	11.4491	18.0577	Saxo1os
ENSMUST00000220853	14.5624	2.10337	0.618112	3.40289	0.000666766	0.00750855	16.9919	21.9421	31.7996	5.10065	6.67866	4.86168	Gm48102
ENSMUST00000148202	14.381	2.10644	0.613256	3.43484	0.000592906	0.00686105	29.4525	20.7231	19.9883	5.10065	4.77047	6.25073	Gm14133
ENSMUST00000030434	30.0139	2.10857	0.445495	4.73309	2.21e-06	4.16e-05	46.4444	48.7603	51.7879	7.14091	8.58685	17.3631	Fuca1
ENSMUST00000189086	12.3183	2.1107	0.670565	3.14765	0.00164591	0.0161134	14.7263	24.3802	20.8969	3.06039	6.67866	4.16715	Lemd1
ENSMUST00000216174	30.0849	2.11164	0.449256	4.70029	2.6e-06	4.81e-05	52.1084	43.8843	50.8794	14.2818	4.77047	14.585	Lta4h
ENSMUST00000217491	152.613	2.11607	0.201335	10.5102	7.75e-26	4.64e-24	217.496	291.343	235.317	60.1877	54.3834	56.9511	Gm47112
ENSMUST00000182690	11.7992	2.12056	0.685078	3.09536	0.00196577	0.0186766	18.1246	20.7231	19.0798	3.06039	2.86228	6.94526	Gm15743
ENSMUST00000066298	13.0484	2.12254	0.659875	3.21657	0.00129732	0.0132157	19.2574	13.4091	30.8911	5.10065	4.77047	4.86168
ENSMUST00000021719	13.7947	2.12341	0.630843	3.36599	0.000762696	0.00838315	24.9214	24.3802	18.1712	3.06039	6.67866	5.5562	Atp5mpl
ENSMUST00000187472	78.0872	2.12368	0.274948	7.72394	1.13e-14	4.22e-13	116.677	124.339	140.827	21.4227	30.531	34.7263	Gm5334
ENSMUST00000131448	15.3685	2.12457	0.598735	3.54843	0.000387534	0.00476279	32.8509	19.5041	22.714	6.12078	4.77047	6.25073	Osgin1
ENSMUST00000031852	727.523	2.12522	0.106576	19.9409	1.8e-88	2.54e-86	1189.43	1287.27	1077.55	270.335	243.294	297.257	4921507P07Rik
ENSMUST00000191122	17.8165	2.12835	0.649413	3.27734	0.00104789	0.0110463	23.7886	37.7892	25.4397	12.2416	0	7.63978	1700027A15Rik
ENSMUST00000081399	27.6999	2.1334	0.454478	4.69419	2.68e-06	4.95e-05	57.7723	37.7892	39.9767	11.2214	7.63275	11.8069	Klk1b9
ENSMUST00000021345	10.5002	2.13505	0.721406	2.95956	0.00308074	0.0273522	18.1246	13.4091	19.9883	3.06039	2.86228	5.5562	Gtf2a1
ENSMUST00000221297	14.7362	2.13801	0.611366	3.49711	0.000470326	0.00564555	24.9214	17.0661	29.9825	6.12078	4.77047	5.5562	Lpin1
ENSMUST00000049308	518.81	2.14008	0.113235	18.8994	1.15e-79	1.5e-77	838.265	783.822	914.92	187.704	193.681	194.467	Itpr3
ENSMUST00000060062	935.912	2.1448	0.102884	20.8468	1.63e-96	2.43e-94	1431.85	1460.37	1690.83	325.422	313.897	393.101	Actrt2
ENSMUST00000039516	16.0544	2.14732	0.587515	3.65492	0.000257262	0.00330367	23.7886	23.1612	31.7996	6.12078	3.81638	7.63978	Egln3
ENSMUST00000118257	61.6903	2.16099	0.332665	6.49601	8.25e-11	2.49e-09	69.1002	99.9587	132.65	26.5234	23.8523	18.0577	Gm4875
ENSMUST00000051297	1582.37	2.16871	0.0703183	30.8414	7.31e-209	3.14e-206	2545.38	2652.56	2569.41	592.696	551.466	582.707	Tnp2
ENSMUST00000152925	167.668	2.16891	0.190959	11.358	6.77e-30	4.5e-28	288.862	288.905	244.403	64.2682	66.7866	52.7839	Gm11651
ENSMUST00000151136	17491.5	2.17093	0.0489686	44.3331	0	0	29042.5	28860	27967.3	6595.14	6531.73	5952.08	Gm10501
ENSMUST00000062917	849.385	2.17117	0.0937087	23.1693	9.29e-119	1.88e-116	1367.28	1392.11	1414.63	291.757	288.136	342.401	4930517N10Rik
ENSMUST00000210331	19.0746	2.17548	0.529333	4.10986	3.96e-05	0.000607668	31.7181	29.2562	32.7082	7.14091	6.67866	6.94526	Pfn5
ENSMUST00000006139	99.1038	2.18113	0.257384	8.4742	2.37e-17	9.99e-16	199.371	164.566	123.564	35.7046	35.3015	36.1153	1700037C18Rik
ENSMUST00000200020	119.298	2.18818	0.232021	9.43095	4.06e-21	2.08e-19	192.574	215.764	179.895	29.5838	48.6588	49.3113	Eif4e
ENSMUST00000120679	136.535	2.19023	0.218734	10.0132	1.33e-23	7.46e-22	237.886	193.822	238.951	63.2481	42.9342	42.3661	Ccnc
ENSMUST00000071204	19.3562	2.19074	0.600997	3.64518	0.000267204	0.00341855	29.4525	25.5992	40.8852	1.02013	6.67866	12.5015	Ppef1
ENSMUST00000048824	2860.17	2.19084	0.0824028	26.5869	9.61e-156	2.61e-153	4259.29	4672.46	5148.81	1052.77	902.573	1125.13	Gm5617
ENSMUST00000236868	25.0288	2.19266	0.473275	4.63296	3.6e-06	6.52e-05	37.3821	42.6653	43.6109	6.12078	8.58685	11.8069	Paip2
ENSMUST00000035220	16.4466	2.1943	0.621145	3.53268	0.000411377	0.00502741	29.4525	26.8182	25.4397	2.04026	3.81638	11.1124	Prkar2a
ENSMUST00000183300	157.532	2.19903	0.194946	11.2802	1.64e-29	1.08e-27	279.799	269.401	227.14	59.1676	53.4293	56.2566	Gm27004
ENSMUST00000017610	18.7036	2.20009	0.552411	3.98271	6.81e-05	0.00098973	32.8509	29.2562	29.9825	4.08052	10.495	5.5562	Timp2
ENSMUST00000033585	1748.61	2.20362	0.0767031	28.7292	1.65e-181	5.86e-179	2814.98	2741.55	3067.3	583.515	610.62	673.69	Pgk2
ENSMUST00000085073	1161.05	2.20639	0.0814167	27.0999	9.86e-162	2.75e-159	1835.12	1927.25	1966.12	395.811	401.674	440.329	Actl11
ENSMUST00000236079	12.5082	2.21146	0.673058	3.28569	0.00101732	0.0108014	20.3902	17.0661	24.5311	2.04026	4.77047	6.25073	Gm50165
ENSMUST00000134911	12.9234	2.21417	0.677591	3.26771	0.00108423	0.0113411	21.523	12.1901	29.9825	6.12078	2.86228	4.86168	Gm12970
ENSMUST00000109586	19.094	2.2181	0.539404	4.11213	3.92e-05	0.000603684	30.5853	35.3512	28.1654	9.18118	5.72456	5.5562	Sertad2
ENSMUST00000211328	3000.66	2.22464	0.066131	33.6399	4.38e-248	2.82e-245	5218.77	4954.05	4654.55	1128.26	1044.73	1003.59	Gm45244
ENSMUST00000163038	103.635	2.23205	0.265047	8.42133	3.72e-17	1.56e-15	193.707	191.384	127.198	32.6442	47.7047	29.1701	Xab2
ENSMUST00000028735	73.7218	2.23207	0.279166	7.9955	1.29e-15	5.07e-14	111.013	138.967	114.479	27.5435	26.7146	23.6139	Jag1
ENSMUST00000032356	11.3304	2.23311	0.728381	3.06586	0.00217047	0.020303	23.7886	18.2851	13.6284	6.12078	4.77047	1.38905	Plcz1
ENSMUST00000218578	155.517	2.23331	0.204206	10.9366	7.7e-28	4.81e-26	279.799	225.516	263.482	47.9461	67.7407	48.6168	BC106175
ENSMUST00000041052	130.856	2.23526	0.215038	10.3947	2.62e-25	1.53e-23	229.956	196.26	220.78	41.8254	55.3375	40.977	H1f6
ENSMUST00000185768	3853.73	2.23764	0.0651679	34.3366	2.23e-258	1.64e-255	6296.05	6099.92	6677.92	1473.07	1248.91	1326.54	1700027A15Rik
ENSMUST00000201768	28.2873	2.23965	0.467806	4.78756	1.69e-06	3.26e-05	64.5691	41.4463	34.5253	7.14091	9.54094	12.5015	Ube2n-ps1
ENSMUST00000072204	19.7143	2.24048	0.547726	4.09052	4.3e-05	0.000657676	43.046	25.5992	29.0739	4.08052	9.54094	6.94526	Klk1b8
ENSMUST00000027374	882.103	2.24246	0.0956744	23.4384	1.74e-121	3.65e-119	1396.73	1394.55	1579.99	294.818	293.861	332.678	Tnp1
ENSMUST00000029535	215.346	2.25162	0.180915	12.4457	1.48e-35	1.09e-33	330.775	316.942	420.663	63.2481	79.1898	81.2595	Lelp1
ENSMUST00000008573	265.421	2.25397	0.155998	14.4487	2.55e-47	2.29e-45	419.132	449.814	448.829	95.8923	75.3734	103.484	Herpud2
ENSMUST00000099274	746.273	2.25474	0.107452	20.9836	9.26e-98	1.45e-95	1146.38	1151.96	1403.73	257.073	249.019	269.476	Pdzd8
ENSMUST00000203703	4269.89	2.25785	0.0582388	38.7689	0	0	6937.21	7136.07	7109.48	1497.55	1566.62	1372.38	1700101I11Rik
ENSMUST00000190043	20.0784	2.26048	0.541598	4.17372	3e-05	0.000471903	30.5853	28.0372	40.8852	10.2013	3.81638	6.94526	1700096J18Rik
ENSMUST00000032441	447.092	2.26172	0.124442	18.175	8.15e-74	9.64e-72	715.924	692.397	811.344	162.201	140.252	160.435	Ccdc91
ENSMUST00000180820	9194.25	2.26617	0.0710824	31.8809	4.92e-223	2.66e-220	16026.7	16242.1	13398.5	3308.28	3291.62	2898.26	Tmem147os
ENSMUST00000115747	22.0015	2.26622	0.526534	4.30404	1.68e-05	0.000280857	49.8428	28.0372	31.7996	7.14091	4.77047	10.4179	Ttll2
ENSMUST00000210634	85.5192	2.26733	0.280216	8.09136	5.9e-16	2.36e-14	108.748	165.785	149.912	25.5033	38.1638	25.0029	Hmgb1-rs17
ENSMUST00000186474	10.3086	2.27134	0.792247	2.86696	0.00414432	0.035041	10.1951	12.1901	29.0739	1.02013	3.81638	5.5562	2410022M11Rik
ENSMUST00000189527	9.46117	2.27349	0.81808	2.77906	0.00545173	0.0441359	10.1951	23.1612	13.6284	1.02013	6.67866	2.08358	Gm53065
ENSMUST00000227544	80.7134	2.27418	0.269779	8.4298	3.46e-17	1.46e-15	151.794	129.215	119.93	31.624	26.7146	25.0029	Gm26766
ENSMUST00000130660	779.62	2.27457	0.0983437	23.1288	2.38e-118	4.71e-116	1249.47	1310.43	1312.87	286.657	281.458	236.833	Armh1
ENSMUST00000108458	27.0635	2.28519	0.459109	4.97743	6.44e-07	1.3e-05	48.71	34.1322	51.7879	9.18118	9.54094	9.02883	Klc3
ENSMUST00000033692	106.267	2.28795	0.240792	9.5018	2.06e-21	1.08e-19	161.989	163.347	204.426	34.6844	31.4851	41.6715	Zcchc13
ENSMUST00000062638	664.969	2.29151	0.101215	22.6401	1.74e-113	3.19e-111	1084.08	1073.95	1156.6	218.308	216.579	240.306	Fam243
ENSMUST00000107000	52.7407	2.2974	0.358626	6.40613	1.49e-10	4.47e-09	66.8346	121.901	74.5019	20.4026	13.3573	19.4467	Sppl2c
ENSMUST00000182235	54.9457	2.30138	0.327258	7.0323	2.03e-12	6.79e-11	100.818	85.3306	87.2218	21.4227	20.9901	13.8905	Gm7745
ENSMUST00000227356	16.5624	2.30141	0.595552	3.86434	0.000111391	0.00154403	28.3198	29.2562	25.4397	2.04026	6.67866	7.63978	Gm4821
ENSMUST00000045487	9.34904	2.3024	0.828547	2.77884	0.00545539	0.0441359	14.7263	7.31405	24.5311	1.02013	5.72456	2.7781	Rhou
ENSMUST00000024954	16.5241	2.30249	0.61492	3.74437	0.000180847	0.00241575	15.8591	26.8182	39.9767	4.08052	4.77047	7.63978	Epas1
ENSMUST00000117586	10.3037	2.30581	0.727766	3.16833	0.00153316	0.0152561	15.8591	18.2851	17.2626	4.08052	2.86228	3.47263	Gm14299
ENSMUST00000122837	23.5766	2.30581	0.487456	4.7303	2.24e-06	4.21e-05	36.2493	42.6653	39.0681	6.12078	7.63275	9.72336	Gm11520
ENSMUST00000077698	26.5683	2.30599	0.464619	4.96319	6.93e-07	1.39e-05	40.7805	39.0083	52.6965	7.14091	11.4491	8.33431	Calml3
ENSMUST00000052211	2347.13	2.31893	0.0837195	27.6988	7.22e-169	2.32e-166	3377.98	4064.17	4291.13	741.635	789.036	818.846	Znrf4
ENSMUST00000055984	239.038	2.31915	0.167323	13.8604	1.1e-43	9.07e-42	389.68	363.264	442.469	66.3085	87.7766	84.7321	Isg20l2
ENSMUST00000099123	206.401	2.32241	0.176382	13.1669	1.36e-39	1.05e-37	326.244	359.607	347.07	54.0669	79.1898	72.2307	Fundc2b
ENSMUST00000007248	2459.84	2.33073	0.0686691	33.9414	1.63e-252	1.12e-249	4058.79	3886.2	4369.27	771.219	818.613	854.961	Hspa1l
ENSMUST00000130003	11.8061	2.33242	0.705866	3.30434	0.000952016	0.0101604	19.2574	19.5041	19.9883	7.14091	2.86228	2.08358	Gm16984
ENSMUST00000025872	118.024	2.34	0.272546	8.58574	9.03e-18	3.87e-16	156.325	196.26	238.951	21.4227	56.2915	38.8934	Spata6l
ENSMUST00000201488	38.19	2.34888	0.391438	6.00065	1.97e-09	5.24e-08	52.1084	74.3595	65.4163	11.2214	11.4491	14.585	Gm4366
ENSMUST00000182789	41.0715	2.35296	0.390637	6.02337	1.71e-09	4.59e-08	72.4986	71.9215	60.8735	16.3221	17.1737	7.63978	Gm27002
ENSMUST00000118388	11.6532	2.3599	0.728843	3.23787	0.00120427	0.0124085	11.3279	24.3802	22.714	2.04026	6.67866	2.7781	Gm14270
ENSMUST00000161043	428.44	2.35997	0.121686	19.394	8.68e-84	1.18e-81	702.33	702.149	745.928	138.738	148.839	132.654	Gm15978
ENSMUST00000046647	32.2755	2.36225	0.434917	5.43149	5.59e-08	1.31e-06	53.2411	42.6653	66.3249	12.2416	6.67866	12.5015	Tex46
ENSMUST00000027401	37.4015	2.36797	0.38969	6.07655	1.23e-09	3.34e-08	61.1707	58.5124	68.142	14.2818	10.495	11.8069	Stk16
ENSMUST00000181128	16.7975	2.37141	0.581952	4.07492	4.6e-05	0.0006992	31.7181	29.2562	23.6226	6.12078	3.81638	6.25073	1810019N24Rik
ENSMUST00000136027	165.341	2.37157	0.223007	10.6345	2.06e-26	1.25e-24	337.572	242.583	250.763	41.8254	73.4652	45.8387	Gm14329
ENSMUST00000142323	821.789	2.37623	0.103193	23.0271	2.49e-117	4.85e-115	1420.52	1429.9	1281.07	307.059	251.881	240.306	4930417H01Rik
ENSMUST00000233069	13.1269	2.37685	0.676145	3.5153	0.000439259	0.00530355	29.4525	15.8471	20.8969	5.10065	1.90819	5.5562	Dino
ENSMUST00000167004	471.431	2.38505	0.140687	16.9528	1.83e-64	2.01e-62	717.056	724.091	934.909	134.657	142.16	175.715	Gpat4
ENSMUST00000002171	178.479	2.39014	0.184291	12.9694	1.83e-38	1.38e-36	310.385	286.467	301.642	56.1072	64.8784	51.3949	Psmc3
ENSMUST00000133534	782.757	2.39427	0.0948524	25.2421	1.38e-140	3.29e-138	1317.44	1248.26	1380.1	248.912	249.019	252.807	Gm14091
ENSMUST00000034983	728.229	2.39468	0.106414	22.5035	3.83e-112	6.81e-110	1131.66	1236.07	1305.6	234.63	205.13	256.28	Atp1b3
ENSMUST00000060389	14.4152	2.40161	0.673056	3.56821	0.00035943	0.00447614	26.0542	34.1322	12.7198	6.12078	1.90819	5.5562	Rspry1
ENSMUST00000151215	944.722	2.41093	0.113146	21.3081	9.55e-101	1.51e-98	1691.26	1665.16	1411.9	291.757	356.831	251.418	4933407I08Rik
ENSMUST00000221235	9.06924	2.41094	0.838199	2.87634	0.00402322	0.0341932	18.1246	4.87603	22.714	3.06039	2.86228	2.7781	4930549C15Rik
ENSMUST00000188296	151.354	2.41927	0.219201	11.0367	2.54e-28	1.61e-26	227.691	238.926	299.825	34.6844	48.6588	58.3401	Gm11696
ENSMUST00000106370	34.1096	2.42095	0.416126	5.81782	5.96e-09	1.52e-07	54.3739	51.1983	67.2335	8.16104	10.495	13.196	Mettl23
ENSMUST00000020617	38.6734	2.42622	0.395596	6.13308	8.62e-10	2.37e-08	58.9051	74.3595	61.7821	15.302	13.3573	8.33431	Flt4
ENSMUST00000199172	19.6114	2.43003	0.560333	4.33676	1.45e-05	0.000243738	45.3116	21.9421	31.7996	6.12078	7.63275	4.86168	Gm42686
ENSMUST00000028102	10.661	2.43201	0.763707	3.18448	0.00145015	0.0145424	27.187	9.75206	17.2626	2.04026	2.86228	4.86168	Kif5c
ENSMUST00000022316	59.1984	2.43661	0.335379	7.26524	3.72e-13	1.3e-11	116.677	92.6446	89.9475	27.5435	12.4032	15.9741	Dydc2
ENSMUST00000007993	44.9145	2.44156	0.371297	6.57576	4.84e-11	1.49e-09	74.7642	71.9215	81.7704	9.18118	12.4032	19.4467	Rbm28
ENSMUST00000077389	16.5761	2.44611	0.600731	4.07189	4.66e-05	0.000707326	32.8509	30.4752	20.8969	6.12078	2.86228	6.25073	Gm7536
ENSMUST00000099988	36.7247	2.44627	0.417655	5.85714	4.71e-09	1.22e-07	49.8428	74.3595	61.7821	8.16104	17.1737	9.02883	Gm10819
ENSMUST00000177238	18.4511	2.4466	0.553881	4.4172	1e-05	0.000172779	28.3198	31.6942	33.6167	5.10065	5.72456	6.25073	Mir5627
ENSMUST00000163119	37.9461	2.44804	0.435545	5.62064	1.9e-08	4.67e-07	36.2493	63.3884	92.6732	10.2013	13.3573	11.8069	Cul3
ENSMUST00000044987	177.288	2.44815	0.202868	12.0677	1.56e-33	1.12e-31	301.322	263.306	336.167	43.8656	49.6129	69.4526	H2ap
ENSMUST00000001547	11.1093	2.44948	0.747259	3.27795	0.00104565	0.0110398	26.0542	15.8471	14.537	1.02013	5.72456	3.47263	Col1a1
ENSMUST00000204477	27.7671	2.45516	0.47419	5.17758	2.25e-07	4.88e-06	47.5772	57.2934	36.3424	10.2013	4.77047	10.4179	Or10b1
ENSMUST00000046174	8.0598	2.45627	0.891036	2.75664	0.00583983	0.0465514	19.2574	10.9711	10.9027	3.06039	0	4.16715	Cldn11
ENSMUST00000201639	8.01352	2.45837	0.892525	2.75439	0.0058801	0.0467638	9.06232	19.5041	11.8113	5.10065	1.90819	0.694526	Gm38554
ENSMUST00000008987	11.0799	2.4632	0.728284	3.3822	0.00071908	0.00801067	14.7263	17.0661	24.5311	4.08052	1.90819	4.16715	Cldn13
ENSMUST00000072519	8.35099	2.4649	0.831653	2.96386	0.00303811	0.0270905	13.5935	9.75206	19.0798	2.04026	2.86228	2.7781	Elmo1
ENSMUST00000069098	10.101	2.46926	0.75616	3.26552	0.00109264	0.0114128	14.7263	15.8471	20.8969	3.06039	1.90819	4.16715	Soga1
ENSMUST00000058914	69.0489	2.46971	0.31324	7.88443	3.16e-15	1.22e-13	112.146	101.178	137.193	29.5838	13.3573	20.8358	Tuba1c
ENSMUST00000070980	76.1135	2.47205	0.283911	8.70714	3.12e-18	1.38e-16	128.005	131.653	126.29	28.5637	24.8064	17.3631	4933402N03Rik
ENSMUST00000069649	204.89	2.4734	0.188714	13.1066	3.02e-39	2.3e-37	299.057	371.797	368.875	74.4695	65.8325	49.3113	Abhd16b
ENSMUST00000230067	12.9667	2.47943	0.723138	3.42871	0.000606458	0.00698918	21.523	23.1612	20.8969	9.18118	0.954094	2.08358	Gm49425
ENSMUST00000140685	33.2897	2.48927	0.44339	5.61419	1.97e-08	4.83e-07	54.3739	46.3223	68.142	16.3221	7.63275	6.94526	Glul
ENSMUST00000111916	19262.5	2.4965	0.0622032	40.1346	0	0	33693.7	34579.6	29898	6220.76	5816.16	5366.6	Fam234b
ENSMUST00000105001	350.277	2.5001	0.137132	18.2313	2.91e-74	3.5e-72	551.669	592.438	641.444	105.073	106.859	104.179	H2al2a
ENSMUST00000085111	407.412	2.5076	0.131289	19.0998	2.53e-81	3.35e-79	636.628	746.033	695.957	133.637	110.675	121.542	Iqcf4
ENSMUST00000130376	18.6234	2.51062	0.631784	3.97386	7.07e-05	0.00102148	11.3279	46.3223	37.251	8.16104	3.81638	4.86168	Zfp451
ENSMUST00000078471	27.8766	2.51475	0.47401	5.30527	1.13e-07	2.55e-06	57.7723	47.5413	37.251	10.2013	4.77047	9.72336	BC048507
ENSMUST00000029955	1568.76	2.51517	0.0798176	31.5115	6.05e-218	3.12e-215	2522.72	2641.59	2849.25	466.2	434.113	498.669	1700009N14Rik
ENSMUST00000205826	8.06183	2.52082	0.857197	2.94077	0.00327402	0.0288444	16.9919	12.1901	11.8113	4.08052	1.90819	1.38905	Gm44980
ENSMUST00000160545	33.2597	2.52979	0.473552	5.34217	9.18e-08	2.1e-06	41.9132	57.2934	71.7763	3.06039	9.54094	15.9741	E430024P14Rik
ENSMUST00000142533	32.793	2.53623	0.427375	5.93444	2.95e-09	7.75e-08	52.1084	64.6074	50.8794	12.2416	8.58685	8.33431	Gm12279
ENSMUST00000073949	34.2991	2.54391	0.41315	6.15735	7.4e-10	2.05e-08	60.0379	54.8554	60.8735	8.16104	11.4491	10.4179	H2al1m
ENSMUST00000213503	7.76791	2.55162	0.911423	2.7996	0.00511666	0.0418097	15.8591	4.87603	19.0798	3.06039	0.954094	2.7781	Ddo
ENSMUST00000167550	14.2525	2.55884	0.681397	3.75528	0.00017315	0.00231896	13.5935	24.3802	35.4339	2.04026	3.81638	6.25073	BC048671
ENSMUST00000122915	13.0283	2.56125	0.665516	3.84852	0.000118835	0.00163402	21.523	24.3802	20.8969	4.08052	3.81638	3.47263	Sirt2
ENSMUST00000033828	15.8439	2.56494	0.627756	4.08588	4.39e-05	0.000669974	16.9919	35.3512	29.0739	3.06039	5.72456	4.86168	Gas6
ENSMUST00000102640	898.282	2.56796	0.100821	25.4705	4.18e-143	1.03e-140	1440.91	1506.69	1667.21	227.489	263.33	284.061	Oxct2a
ENSMUST00000008051	659.562	2.5752	0.125731	20.4818	3.13e-93	4.6e-91	1111.27	1031.28	1250.18	160.161	174.599	229.888	Cabs1
ENSMUST00000136880	327.776	2.57818	0.147164	17.5191	1.02e-68	1.17e-66	543.739	569.277	574.21	83.6507	83.9603	111.819	Gm11780
ENSMUST00000229156	16.811	2.58105	0.618168	4.17532	2.98e-05	0.000470766	37.3821	23.1612	25.4397	6.12078	6.67866	2.08358	Gm41396
ENSMUST00000112707	1785.32	2.58625	0.0778627	33.2155	6.42e-242	3.89e-239	2931.66	3121.88	3134.53	453.958	514.257	555.62	Lrrc8b
ENSMUST00000118417	37.3894	2.59317	0.413273	6.27471	3.5e-10	1.01e-08	67.9674	52.4173	72.6848	7.14091	9.54094	14.585	Gm14130
ENSMUST00000084614	8.92781	2.61165	0.828309	3.15299	0.00161606	0.0158815	12.4607	10.9711	22.714	2.04026	1.90819	3.47263	Gm10288
ENSMUST00000213652	10.5648	2.61364	0.79817	3.27454	0.00105834	0.0111336	10.1951	19.5041	24.5311	6.12078	0.954094	2.08358	Plekho2
ENSMUST00000052853	538.991	2.63369	0.118722	22.1837	4.93e-109	8.47e-107	915.295	866.715	1002.14	139.758	166.966	143.072	Ubl4b
ENSMUST00000046004	233.884	2.63735	0.163839	16.0972	2.67e-58	2.8e-56	399.875	394.959	414.303	60.1877	68.6948	65.2854	Tex44
ENSMUST00000205787	628.541	2.63918	0.104557	25.2415	1.41e-140	3.29e-138	1097.67	1106.86	1044.84	175.462	175.553	170.853	4732471J01Rik
ENSMUST00000064377	1541.87	2.64077	0.0843649	31.3017	4.42e-215	2.07e-212	2671.12	2713.51	2582.13	471.3	443.654	369.488	Gcc1
ENSMUST00000099556	11.6789	2.64278	0.743595	3.55406	0.000379337	0.00467319	15.8591	13.4091	30.8911	3.06039	4.77047	2.08358	Fam122a
ENSMUST00000040806	2181.97	2.64989	0.0647533	40.9229	0	0	3711.02	3786.24	3797.78	576.374	602.987	617.433	Dbil5
ENSMUST00000186770	70.1582	2.65131	0.295608	8.969	2.99e-19	1.4e-17	116.677	134.091	112.661	17.3422	20.036	20.1412	1700016P04Rik
ENSMUST00000170863	19.6828	2.65144	0.571543	4.63909	3.5e-06	6.36e-05	38.5149	36.5702	26.3482	8.16104	5.72456	2.7781	5031439G07Rik
ENSMUST00000015157	7.29082	2.65498	0.921669	2.88062	0.00396892	0.0338657	6.79674	14.6281	16.3541	1.02013	2.86228	2.08358	Trappc2l
ENSMUST00000059121	813.369	2.65865	0.0965836	27.5269	8.36e-167	2.53e-164	1421.65	1429.9	1363.75	224.429	202.268	238.222	Ubqlnl
ENSMUST00000143166	64.7859	2.68579	0.323812	8.29429	1.09e-16	4.54e-15	131.404	106.054	98.1245	19.3825	21.9442	11.8069	Gm13538
ENSMUST00000128384	188.633	2.69169	0.183413	14.6756	9.25e-49	8.66e-47	342.103	305.971	331.625	51.0065	52.4752	48.6168	Fam187b
ENSMUST00000189531	10.2068	2.69683	0.824114	3.2724	0.0010664	0.011207	26.0542	12.1901	14.537	2.04026	5.72456	0.694526	H2al1b
ENSMUST00000000127	192.748	2.69931	0.186366	14.4839	1.53e-47	1.38e-45	310.385	363.264	329.807	43.8656	51.5211	57.6456	Wnt3
ENSMUST00000094245	1153.85	2.69956	0.0858719	31.437	6.32e-217	3.1e-214	1887.23	2080.85	2029.72	303.999	328.208	293.09	Cldn3
ENSMUST00000045771	806.572	2.70347	0.0964705	28.0239	8.32e-173	2.86e-170	1358.22	1393.33	1445.52	197.905	219.442	225.026	Spem1
ENSMUST00000216324	14.8117	2.70482	0.666413	4.05878	4.93e-05	0.000741683	28.3198	29.2562	19.0798	5.10065	5.72456	1.38905	Gm47757
ENSMUST00000166032	35814.1	2.71179	0.0507352	53.4499	0	0	63708.1	63741.9	58971	9699.4	9853.88	8910.07	Tdrkh
ENSMUST00000108450	22.8414	2.72072	0.518671	5.24555	1.56e-07	3.49e-06	33.9837	37.7892	47.2451	5.10065	6.67866	6.25073	Nectin2
ENSMUST00000056676	9.80338	2.72498	0.788103	3.45764	0.000544924	0.00639928	15.8591	13.4091	21.8054	3.06039	1.90819	2.7781	Mrgprb8
ENSMUST00000211904	8.55734	2.72719	0.901108	3.02649	0.00247414	0.0227713	19.2574	18.2851	7.26848	3.06039	0	3.47263	Trappc2l
ENSMUST00000143605	97.6376	2.73245	0.25836	10.5762	3.84e-26	2.32e-24	176.715	146.281	186.255	27.5435	21.9442	27.0865	Itpr3os
ENSMUST00000102500	1651.43	2.74098	0.0797044	34.3893	3.64e-259	2.89e-256	3089.12	2876.86	2654.81	413.153	439.837	434.773	Gemin4
ENSMUST00000050067	230.044	2.74375	0.169493	16.188	6.12e-59	6.5e-57	416.867	405.93	378.87	62.228	52.4752	63.8964	Hectd3
ENSMUST00000105137	16.0531	2.74496	0.629273	4.36211	1.29e-05	0.00021892	26.0542	29.2562	28.1654	4.08052	6.67866	2.08358	H2al1n
ENSMUST00000187986	8.6942	2.74942	0.868594	3.16536	0.00154889	0.0153829	13.5935	7.31405	24.5311	2.04026	1.90819	2.7781	1700049E22Rik
ENSMUST00000192482	563.826	2.7498	0.125407	21.927	1.44e-106	2.38e-104	865.452	984.958	1092.09	155.06	155.517	129.876	Gm17244
ENSMUST00000081966	6778.89	2.75382	0.060988	45.1535	0	0	11309.8	11498.9	12619	1643.43	1729.77	1872.44	Odf1
ENSMUST00000130050	25.3648	2.77072	0.502626	5.51248	3.54e-08	8.43e-07	50.9756	45.1033	36.3424	9.18118	5.72456	4.86168	Wdr13
ENSMUST00000234040	515.226	2.77236	0.120574	22.993	5.48e-117	1.04e-114	883.576	928.884	882.212	153.02	122.124	121.542	Gm26885
ENSMUST00000089246	8.5899	2.79341	0.86619	3.22494	0.00126001	0.0128994	14.7263	13.4091	17.2626	1.02013	0.954094	4.16715	Tex13c3
ENSMUST00000198828	13.2213	2.80174	0.719286	3.89516	9.81e-05	0.00136848	19.2574	15.8471	34.5253	1.02013	3.81638	4.86168	Gm43833
ENSMUST00000164518	4064.33	2.8143	0.0566292	49.6971	0	0	7171.7	6842.29	7338.44	997.688	998.936	1036.93	4933411K16Rik
ENSMUST00000056941	1178.46	2.81539	0.0943766	29.8314	1.53e-195	6.06e-193	2085.47	2008.93	2100.59	300.939	244.248	330.594	Spem2
ENSMUST00000059026	4298.79	2.82003	0.0553338	50.964	0	0	7359.74	7685.85	7543.78	1112.96	1059.04	1031.37	Abi3
ENSMUST00000102648	939.849	2.82353	0.0951202	29.6838	1.24e-193	4.74e-191	1562.12	1601.78	1778.05	226.469	228.983	241.695	Oxct2b
ENSMUST00000029078	205.928	2.82965	0.180624	15.6659	2.59e-55	2.64e-53	346.634	391.302	346.161	47.9461	48.6588	54.8675	Car2
ENSMUST00000031719	708.558	2.83547	0.101814	27.8496	1.09e-170	3.61e-168	1260.8	1204.38	1262.9	170.362	184.14	168.77	Fscn3
ENSMUST00000061866	479.739	2.84762	0.144554	19.6993	2.18e-86	3.04e-84	740.845	841.116	948.537	103.033	101.134	143.767	Dnajb8
ENSMUST00000112720	8.57701	2.84782	0.900477	3.16256	0.00156387	0.015472	12.4607	17.0661	15.4455	5.10065	0	1.38905	Apex2
ENSMUST00000035180	32.5933	2.85437	0.477836	5.97354	2.32e-09	6.15e-08	56.6395	46.3223	69.0506	11.2214	1.90819	10.4179	Nudt16l2
ENSMUST00000191501	10.4262	2.85628	0.792326	3.60493	0.00031224	0.00394088	19.2574	12.1901	23.6226	3.06039	0.954094	3.47263	Slc18a3
ENSMUST00000144165	6.57283	2.85651	1.02655	2.78264	0.00539188	0.0436908	7.92953	9.75206	17.2626	1.02013	0	3.47263	Npm3
ENSMUST00000117816	9.25386	2.85867	0.877628	3.25727	0.00112491	0.0116671	7.92953	18.2851	22.714	0	3.81638	2.7781	H2al1r-ps
ENSMUST00000122821	24.1159	2.86299	0.52545	5.44865	5.08e-08	1.19e-06	43.046	36.5702	48.1537	4.08052	3.81638	9.02883	4930555O08Rik
ENSMUST00000192140	7.90201	2.86422	0.908118	3.15402	0.00161039	0.0158408	15.8591	9.75206	16.3541	1.02013	0.954094	3.47263	Gm37124
ENSMUST00000209372	9.85401	2.86692	0.807866	3.54876	0.000387049	0.0047625	19.2574	13.4091	19.0798	4.08052	1.90819	1.38905	Junb
ENSMUST00000161576	8.56617	2.88561	0.963042	2.99635	0.00273231	0.024706	13.5935	2.43802	29.0739	2.04026	2.86228	1.38905	Herpud1
ENSMUST00000180068	956.366	2.89744	0.106011	27.3315	1.79e-164	5.13e-162	1459.03	1839.48	1758.97	227.489	241.386	211.83	Yjefn3
ENSMUST00000020508	12.133	2.92931	0.739331	3.96211	7.43e-05	0.00106711	19.2574	17.0661	28.1654	1.02013	3.81638	3.47263	Smim23
ENSMUST00000197231	26.8239	2.93425	0.513001	5.71977	1.07e-08	2.67e-07	37.3821	49.9793	54.5136	5.10065	10.495	3.47263	1700012D16Rik
ENSMUST00000050373	2122.13	2.93619	0.0827227	35.4943	6.02e-276	5.63e-273	3334.93	3831.34	4093.06	483.542	519.027	470.888	Tssk6
ENSMUST00000028624	18.7471	2.94252	0.586357	5.01831	5.21e-07	1.08e-05	30.5853	31.6942	37.251	3.06039	5.72456	4.16715	Gatm
ENSMUST00000181939	6.01926	2.94665	1.06485	2.76719	0.00565417	0.045423	5.66395	7.31405	19.0798	1.02013	0.954094	2.08358	Gm26559
ENSMUST00000051672	7.88876	2.95396	0.98756	2.99117	0.00277911	0.0250193	13.5935	17.0661	11.8113	0	0	4.86168	Bst2
ENSMUST00000123914	24.2686	2.96224	0.587474	5.04233	4.6e-07	9.63e-06	52.1084	39.0083	37.251	5.10065	11.4491	0.694526	Gramd2
ENSMUST00000151656	9.24811	2.96664	0.870149	3.40934	0.000651194	0.00739432	12.4607	10.9711	25.4397	3.06039	2.86228	0.694526	Psmf1
ENSMUST00000110167	3616.2	2.98916	0.0747126	40.0088	0	0	6262.07	6516.82	6482.58	868.131	875.858	691.747	Ndufa13
ENSMUST00000095183	14.8474	3.00602	0.691234	4.34878	1.37e-05	0.000231509	27.187	17.0661	34.5253	5.10065	3.81638	1.38905	Gm10308
ENSMUST00000222104	6.12207	3.01114	1.06086	2.83841	0.00453394	0.0378711	10.1951	14.6281	8.17704	0	0.954094	2.7781	Gm34408
ENSMUST00000022881	59.9386	3.06266	0.338279	9.05364	1.38e-19	6.62e-18	101.951	98.7396	119.93	14.2818	14.3114	10.4179	Retreg1
ENSMUST00000154116	8.31929	3.07464	0.896801	3.42846	0.000607017	0.00698918	14.7263	17.0661	12.7198	3.06039	0.954094	1.38905	1700034H15Rik
ENSMUST00000141174	14.1493	3.08871	0.707062	4.36837	1.25e-05	0.000213445	16.9919	26.8182	31.7996	4.08052	3.81638	1.38905	Gm14493
ENSMUST00000234468	19.3902	3.10938	0.591093	5.2604	1.44e-07	3.24e-06	32.8509	30.4752	40.8852	5.10065	2.86228	4.16715	Ttc7
ENSMUST00000152591	39.8222	3.15132	0.412293	7.64339	2.12e-14	7.87e-13	74.7642	68.2644	71.7763	8.16104	7.63275	8.33431	Sdc3
ENSMUST00000208413	8.22854	3.15438	0.933116	3.38048	0.000723597	0.00804786	13.5935	10.9711	19.9883	2.04026	0	2.7781	Gm19963
ENSMUST00000061052	7.0298	3.16871	0.995281	3.18374	0.00145387	0.0145656	11.3279	12.1901	14.537	2.04026	0	2.08358	Atat1
ENSMUST00000098908	70.5859	3.17106	0.324361	9.77633	1.42e-22	7.79e-21	108.748	135.31	138.101	10.2013	12.4032	18.7522	Defb33
ENSMUST00000022616	27.4523	3.18495	0.524772	6.06922	1.29e-09	3.48e-08	49.8428	52.4173	46.3366	1.02013	9.54094	5.5562	Clu
ENSMUST00000203863	10.7687	3.26682	0.810582	4.03022	5.57e-05	0.000828145	22.6558	19.5041	16.3541	3.06039	0.954094	2.08358	Igf2bp3
ENSMUST00000229121	18.8875	3.29194	0.613849	5.36278	8.2e-08	1.89e-06	37.3821	35.3512	29.9825	3.06039	4.77047	2.7781	Efcab1
ENSMUST00000045779	6.54694	3.36977	1.09032	3.09063	0.00199735	0.0189243	16.9919	13.4091	5.45136	2.04026	0	1.38905	Ttyh2
ENSMUST00000097014	6.82503	3.40943	1.06291	3.20763	0.00133832	0.0135663	12.4607	15.8471	9.0856	0	2.86228	0.694526	Tuba1a
ENSMUST00000024811	33.6218	3.46819	0.497354	6.97329	3.1e-12	1.01e-10	43.046	63.3884	78.1362	5.10065	8.58685	3.47263	Pim1
ENSMUST00000191984	6.04683	3.75377	1.16733	3.2157	0.00130127	0.0132428	13.5935	8.53306	11.8113	0	0.954094	1.38905	Gm43917
ENSMUST00000073575	19.2356	3.79574	0.670271	5.663	1.49e-08	3.68e-07	30.5853	46.3223	30.8911	1.02013	3.81638	2.7781	Slc39a13
ENSMUST00000194267	6.55054	3.80568	1.12396	3.38596	0.000709298	0.00793166	10.1951	14.6281	11.8113	1.02013	0.954094	0.694526	4930412E21Rik
ENSMUST00000108682	6.36448	3.81399	1.14979	3.31711	0.000909554	0.00977991	13.5935	12.1901	9.99416	1.02013	0	1.38905	Gas7
ENSMUST00000148568	6.88399	3.86946	1.14688	3.37391	0.000741079	0.00821568	12.4607	20.7231	5.45136	1.02013	0.954094	0.694526	Hopxos
ENSMUST00000053180	9.50638	3.95358	0.973609	4.06075	4.89e-05	0.000736531	19.2574	20.7231	13.6284	2.04026	0	1.38905	Defb19
ENSMUST00000173852	9.61853	3.98863	0.981672	4.0631	4.84e-05	0.000731274	12.4607	25.5992	16.3541	0	1.90819	1.38905	Ppp1r2-ps9
ENSMUST00000173460	10.2833	4.05382	0.945578	4.28714	1.81e-05	0.00029968	15.8591	19.5041	22.714	1.02013	1.90819	0.694526	Mapk6
ENSMUST00000198477	16130.9	4.27588	0.290171	14.7357	3.8e-49	3.59e-47	25004.1	30762.9	36268.8	1171.11	1483.62	2094.69
ENSMUST00000028935	14.3829	4.53772	0.906745	5.00441	5.6e-07	1.15e-05	27.187	28.0372	27.2568	0	3.81638	0	Cst9
ENSMUST00000237689	7.82464	4.77074	1.26573	3.76915	0.000163804	0.0021995	16.9919	15.8471	12.7198	0	0	1.38905	Gm29860
ENSMUST00000102326	24.9397	4.83686	0.731883	6.60878	3.87e-11	1.2e-09	36.2493	45.1033	63.5992	0	1.90819	2.7781
ENSMUST00000090025	21.5228	4.87202	0.778118	6.26129	3.82e-10	1.09e-08	38.5149	40.2273	46.3366	1.02013	0.954094	2.08358	Aard
ENSMUST00000102303	6774.33	4.90855	0.337432	14.5468	6.12e-48	5.58e-46	10231.4	12002.4	17103.6	295.838	455.103	557.704
