# Supplementary material for: Targeted mRNP-phagy licenses translational activation during cellular metamorphosis
Source: Research Square preprint supplement (doi:10.21203/rs.3.rs-6289188/v1), 2025-05-06
Supplement: Supplementary file 5 [file 64ce726459599e725500d79a.xlsx]

## Sheet: Mex3d_ES-WT_ ES
Transcript.stable.ID	baseMean	log2FoldChange	lfcSE	stat	pvalue	padj	ME1	ME2	ME3	WE1	WE2	WE3	Gene.name	Gene.stable.ID	Gene.description
ENSMUST00000000001	28.4968	-0.329046	0.343401	-0.958199	0.337962	0.608425	14.6671	29.5249	31.6603	25.3259	37.6691	32.1333	Gnai3	ENSMUSG00000000001	guanine nucleotide binding protein (G protein), alpha inhibiting 3 [Source:MGI Symbol;Acc:MGI:95773]
ENSMUST00000000049	47.83	0.22306	0.275891	0.808511	0.418797	0.676213	36.1788	48.7802	69.4767	51.626	33.4837	47.4349	Apoh	ENSMUSG00000000049	apolipoprotein H [Source:MGI Symbol;Acc:MGI:88058]
ENSMUST00000000080	2.97546	0.771537	1.11871	0.689664	0.490405	NA	6.84463	2.56738	1.7589	4.87037	1.04637	0.765079	Klf6	ENSMUSG00000000078	Kruppel-like factor 6 [Source:MGI Symbol;Acc:MGI:1346318]
ENSMUST00000000094	0.641845	2.8937	3.72331	0.777183	0.437051	NA	0	3.85107	0	0	0	0	Dlgap4	ENSMUSG00000061689	DLG associated protein 4 [Source:MGI Symbol;Acc:MGI:2138865]
ENSMUST00000000095	5.56567	-0.00915752	0.794501	-0.0115261	0.990804	NA	1.95561	11.5532	3.51781	2.92222	7.32456	6.12064	Tbx2	ENSMUSG00000000093	T-box 2 [Source:MGI Symbol;Acc:MGI:98494]
ENSMUST00000000109	5.52937	0.490064	0.736284	0.665591	0.505673	NA	5.86683	6.41845	7.03561	5.84445	4.18546	3.8254	Cntn1	ENSMUSG00000055022	contactin 1 [Source:MGI Symbol;Acc:MGI:105980]
ENSMUST00000000122	30.6337	-0.190881	0.353673	-0.539711	0.589396	0.797768	39.1122	32.0922	14.9507	23.3778	42.901	31.3683	Ngfr	ENSMUSG00000000120	nerve growth factor receptor (TNFR superfamily, member 16) [Source:MGI Symbol;Acc:MGI:97323]
ENSMUST00000000127	419.133	0.955357	0.104956	9.10243	8.83315e-20	5.11447e-18	503.57	569.958	584.835	266.896	311.817	277.724	Wnt3	ENSMUSG00000000125	wingless-type MMTV integration site family, member 3 [Source:MGI Symbol;Acc:MGI:98955]
ENSMUST00000000137	14.2223	0.392261	0.469468	0.835544	0.403412	0.663562	21.5117	15.4043	11.4329	8.76667	16.7418	11.4762	Actr2	ENSMUSG00000020152	ARP2 actin-related protein 2 [Source:MGI Symbol;Acc:MGI:1913963]
ENSMUST00000000153	48.3871	0.211519	0.271738	0.778396	0.436336	0.691935	74.3132	35.9433	44.852	48.7037	42.901	43.6095	Gna12	ENSMUSG00000000149	guanine nucleotide binding protein, alpha 12 [Source:MGI Symbol;Acc:MGI:95767]
ENSMUST00000000171	0.324692	-1.763	4.03225	-0.437225	0.661948	NA	0	0	0	1.94815	0	0	Pih1d2	ENSMUSG00000000167	PIH1 domain containing 2 [Source:MGI Symbol;Acc:MGI:1919864]
ENSMUST00000000175	12.7926	-0.349493	0.484828	-0.72086	0.470996	0.718569	11.7337	10.2695	11.4329	15.5852	17.7882	9.94603	Sdhd	ENSMUSG00000000171	succinate dehydrogenase complex, subunit D, integral membrane protein [Source:MGI Symbol;Acc:MGI:1914175]
ENSMUST00000000188	5.20905	1.22284	0.801186	1.52629	0.126938	NA	8.80024	7.70214	5.27671	1.94815	5.23183	2.29524	Ccnd2	ENSMUSG00000000184	cyclin D2 [Source:MGI Symbol;Acc:MGI:88314]
ENSMUST00000000199	23.0437	0.271156	0.357902	0.757625	0.448675	0.702281	29.3341	23.1064	22.8657	19.4815	25.1128	18.3619	Ncs1	ENSMUSG00000062661	neuronal calcium sensor 1 [Source:MGI Symbol;Acc:MGI:109166]
ENSMUST00000000201	1.93686	1.79742	1.46127	1.23004	0.218683	NA	3.91122	2.56738	2.63835	0.974075	0	1.53016	Nalcn	ENSMUSG00000000197	sodium leak channel, non-selective [Source:MGI Symbol;Acc:MGI:2444306]
ENSMUST00000000219	0.900688	-2.02837	2.44251	-0.830445	0.406287	NA	0	0	0.879451	1.94815	1.04637	1.53016	Th	ENSMUSG00000000214	tyrosine hydroxylase [Source:MGI Symbol;Acc:MGI:98735]
ENSMUST00000000253	0.976074	1.39425	2.49211	0.559465	0.575845	NA	0	2.56738	1.7589	0	0	1.53016	Lhx2	ENSMUSG00000000247	LIM homeobox protein 2 [Source:MGI Symbol;Acc:MGI:96785]
ENSMUST00000000266	0.417994	-0.500283	4.06074	-0.1232	0.901949	NA	0.977805	0	0	0	0	1.53016	Ifi202b	ENSMUSG00000026535	interferon activated gene 202B [Source:MGI Symbol;Acc:MGI:1347083]
ENSMUST00000000275	6.33891	-0.821213	0.718388	-1.14313	0.252983	NA	2.93341	7.70214	3.51781	5.84445	7.32456	10.7111	Glra3	ENSMUSG00000038257	glycine receptor, alpha 3 subunit [Source:MGI Symbol;Acc:MGI:95749]
ENSMUST00000000287	20.3689	-0.0286606	0.386735	-0.0741092	0.940924	0.973111	21.5117	17.9717	21.1068	13.637	21.9737	26.0127	Scpep1	ENSMUSG00000000278	serine carboxypeptidase 1 [Source:MGI Symbol;Acc:MGI:1921867]
ENSMUST00000000291	36.8355	-0.340914	0.293823	-1.16027	0.24594	0.5119	30.312	33.3759	33.4192	35.0667	54.411	34.4286	Mnt	ENSMUSG00000000282	max binding protein [Source:MGI Symbol;Acc:MGI:109150]
ENSMUST00000000314	0.983023	-1.03954	2.33934	-0.444374	0.656772	NA	0.977805	0	0.879451	1.94815	2.09273	0	Cdh4	ENSMUSG00000000305	cadherin 4 [Source:MGI Symbol;Acc:MGI:99218]
ENSMUST00000000326	1.88449	-0.001494	1.53242	-0.000974929	0.999222	NA	3.91122	0	1.7589	0	1.04637	4.59048	Bcl6b	ENSMUSG00000000317	B cell CLL/lymphoma 6, member B [Source:MGI Symbol;Acc:MGI:1278332]
ENSMUST00000000329	22.3462	0.106051	0.392261	0.270358	0.786885	0.906977	22.4895	23.1064	23.7452	35.0667	13.6027	16.0667	Alox12	ENSMUSG00000000320	arachidonate 12-lipoxygenase [Source:MGI Symbol;Acc:MGI:87998]
ENSMUST00000000348	4.24118	1.27907	0.890557	1.43626	0.150928	NA	6.84463	7.70214	3.51781	1.94815	3.1391	2.29524	Rtca	ENSMUSG00000000339	RNA 3'-terminal phosphate cyclase [Source:MGI Symbol;Acc:MGI:1913618]
ENSMUST00000000349	3.10937	-0.86037	1.10477	-0.778778	0.436111	NA	0	5.13476	1.7589	5.84445	2.09273	3.8254	Dbt	ENSMUSG00000000340	dihydrolipoamide branched chain transacylase E2 [Source:MGI Symbol;Acc:MGI:105386]
ENSMUST00000000356	26.6902	-0.114411	0.33545	-0.341068	0.733052	0.881828	21.5117	28.2412	27.263	34.0926	23.02	26.0127	Dazap2	ENSMUSG00000000346	DAZ associated protein 2 [Source:MGI Symbol;Acc:MGI:1344344]
ENSMUST00000000384	15.3721	-0.0162759	0.464265	-0.0350575	0.972034	0.988399	22.4895	16.688	7.03561	15.5852	13.6027	16.8317	Trappc10	ENSMUSG00000000374	trafficking protein particle complex 10 [Source:MGI Symbol;Acc:MGI:1336209]
ENSMUST00000000395	0.650005	-1.38653	3.41922	-0.405511	0.685102	NA	0.977805	0	0	2.92222	0	0	Tmprss2	ENSMUSG00000000385	transmembrane protease, serine 2 [Source:MGI Symbol;Acc:MGI:1354381]
ENSMUST00000000421	949.373	0.139561	0.0803911	1.73603	0.0825586	0.270089	977.805	1006.41	1004.33	849.393	870.576	987.718	Tssk3	ENSMUSG00000000411	testis-specific serine kinase 3 [Source:MGI Symbol;Acc:MGI:1929914]
ENSMUST00000000430	0.545507	-1.07822	3.7374	-0.288494	0.772969	NA	0.977805	0	0	0	0	2.29524	Galnt1	ENSMUSG00000000420	polypeptide N-acetylgalactosaminyltransferase 1 [Source:MGI Symbol;Acc:MGI:894693]
ENSMUST00000000449	240.45	0.255076	0.121531	2.09886	0.0358293	0.154769	261.074	264.44	259.438	242.545	204.041	211.162	Mkrn2	ENSMUSG00000000439	makorin, ring finger protein, 2 [Source:MGI Symbol;Acc:MGI:1914277]
ENSMUST00000000466	0.38254	-2.03581	4.01094	-0.507563	0.61176	NA	0	0	0	0	0	2.29524	Plin2	ENSMUSG00000028494	perilipin 2 [Source:MGI Symbol;Acc:MGI:87920]
ENSMUST00000000500	2.06046	0.039129	1.35784	0.0288171	0.97701	NA	2.93341	2.56738	0.879451	2.92222	0	3.06032	Pdgfb	ENSMUSG00000000489	platelet derived growth factor, B polypeptide [Source:MGI Symbol;Acc:MGI:97528]
ENSMUST00000000505	92.4389	0.0923705	0.20272	0.455656	0.648637	0.835418	91.9137	124.518	72.115	92.5371	76.3846	97.1651	Mcm7	ENSMUSG00000029730	minichromosome maintenance complex component 7 [Source:MGI Symbol;Acc:MGI:1298398]
ENSMUST00000000543	2.52319	0.281469	1.34605	0.209107	0.834365	NA	0	3.85107	4.39726	5.84445	1.04637	0	Grasp	ENSMUSG00000000531	GRP1 (general receptor for phosphoinositides 1)-associated scaffold protein [Source:MGI Symbol;Acc:MGI:1860303]
ENSMUST00000000544	18.4678	-0.602756	0.403594	-1.49347	0.135314	0.36362	15.6449	15.4043	13.1918	17.5333	23.02	26.0127	Acvr1b	ENSMUSG00000000532	activin A receptor, type 1B [Source:MGI Symbol;Acc:MGI:1338944]
ENSMUST00000000573	5.30337	0.403845	0.75815	0.532672	0.59426	NA	5.86683	5.13476	7.03561	6.81852	3.1391	3.8254	Ovgp1	ENSMUSG00000074340	oviductal glycoprotein 1 [Source:MGI Symbol;Acc:MGI:106661]
ENSMUST00000000579	4.61707	0.307106	0.851305	0.360748	0.718288	NA	2.93341	2.56738	9.67397	5.84445	2.09273	4.59048	Sox9	ENSMUSG00000000567	SRY (sex determining region Y)-box 9 [Source:MGI Symbol;Acc:MGI:98371]
ENSMUST00000000590	0.324692	-1.763	4.03225	-0.437225	0.661948	NA	0	0	0	1.94815	0	0	Rdx	ENSMUSG00000032050	radixin [Source:MGI Symbol;Acc:MGI:97887]
ENSMUST00000000608	119.266	0.0661273	0.182684	0.361976	0.71737	0.872906	95.8249	156.61	116.088	106.174	107.776	133.124	Gm2a	ENSMUSG00000000594	GM2 ganglioside activator protein [Source:MGI Symbol;Acc:MGI:95762]
ENSMUST00000000619	5.93507	-0.691085	0.73909	-0.935049	0.349763	NA	6.84463	1.28369	5.27671	7.7926	5.23183	9.18095	Clcn4	ENSMUSG00000000605	chloride channel, voltage-sensitive 4 [Source:MGI Symbol;Acc:MGI:104571]
ENSMUST00000000641	0.697885	1.65943	2.83345	0.585657	0.558106	NA	0.977805	1.28369	0.879451	0	1.04637	0	Sema4f	ENSMUSG00000000627	sema domain, immunoglobulin domain (Ig), TM domain, and short cytoplasmic domain [Source:MGI Symbol;Acc:MGI:1340055]
ENSMUST00000000642	5.96136	0.681099	0.724093	0.940624	0.346897	NA	4.88902	10.2695	7.03561	5.84445	3.1391	4.59048	Hk2	ENSMUSG00000000628	hexokinase 2 [Source:MGI Symbol;Acc:MGI:1315197]
ENSMUST00000000696	0.631942	0.477263	3.21308	0.148538	0.881919	NA	0.977805	1.28369	0	0	0	1.53016	Cd52	ENSMUSG00000000682	CD52 antigen [Source:MGI Symbol;Acc:MGI:1346088]
ENSMUST00000000707	1.40011	1.71331	1.8283	0.937104	0.348705	NA	2.93341	2.56738	0.879451	0.974075	1.04637	0	Loxl3	ENSMUSG00000000693	lysyl oxidase-like 3 [Source:MGI Symbol;Acc:MGI:1337004]
ENSMUST00000000724	7.27008	0.631478	0.660647	0.955848	0.339149	NA	8.80024	12.8369	5.27671	4.87037	4.18546	7.65079	Kat2b	ENSMUSG00000000708	K(lysine) acetyltransferase 2B [Source:MGI Symbol;Acc:MGI:1343094]
ENSMUST00000000727	15.1635	-0.154229	0.483702	-0.31885	0.74984	0.890936	6.84463	24.3901	12.3123	11.6889	21.9737	13.7714	Rab5b	ENSMUSG00000000711	RAB5B, member RAS oncogene family [Source:MGI Symbol;Acc:MGI:105938]
ENSMUST00000000755	2.30406	-0.0785828	1.30478	-0.060227	0.951975	NA	0.977805	1.28369	4.39726	4.87037	0	2.29524	Sult5a1	ENSMUSG00000000739	sulfotransferase family 5A, member 1 [Source:MGI Symbol;Acc:MGI:1931463]
ENSMUST00000000756	8.06226	0.0823052	0.609661	0.135002	0.892611	NA	6.84463	6.41845	11.4329	5.84445	9.41729	8.41587	Rpl13	ENSMUSG00000000740	ribosomal protein L13 [Source:MGI Symbol;Acc:MGI:105922]
ENSMUST00000000759	41.1595	-0.171075	0.274412	-0.623423	0.533007	0.761691	41.0678	46.2128	29.9014	42.8593	38.7155	48.2	Chmp1a	ENSMUSG00000000743	charged multivesicular body protein 1A [Source:MGI Symbol;Acc:MGI:1920159]
ENSMUST00000000769	0.867622	3.35241	2.83186	1.18382	0.236484	NA	0	2.56738	2.63835	0	0	0	Serpinf1	ENSMUSG00000000753	serine (or cysteine) peptidase inhibitor, clade F, member 1 [Source:MGI Symbol;Acc:MGI:108080]
ENSMUST00000000776	0.544886	-2.53355	3.68352	-0.687807	0.491574	NA	0	0	0	0.974075	0	2.29524	Tubgcp3	ENSMUSG00000000759	tubulin, gamma complex associated protein 3 [Source:MGI Symbol;Acc:MGI:2183752]
ENSMUST00000000804	6.30319	0.443367	0.712383	0.622372	0.533697	NA	11.7337	3.85107	6.15616	6.81852	3.1391	6.12064	Ddx3x	ENSMUSG00000000787	DEAD/H (Asp-Glu-Ala-Asp/His) box polypeptide 3, X-linked [Source:MGI Symbol;Acc:MGI:103064]
ENSMUST00000000809	2.36657	-1.00238	1.24661	-0.804089	0.421346	NA	1.95561	0	2.63835	2.92222	2.09273	4.59048	Slc5a5	ENSMUSG00000000792	solute carrier family 5 (sodium iodide symporter), member 5 [Source:MGI Symbol;Acc:MGI:2149330]
ENSMUST00000000811	2.18161	0.768068	1.33547	0.57513	0.565204	NA	2.93341	2.56738	2.63835	0	4.18546	0.765079	Kcnn3	ENSMUSG00000000794	potassium intermediate/small conductance calcium-activated channel, subfamily N, member 3 [Source:MGI Symbol;Acc:MGI:2153183]
ENSMUST00000000828	25.9931	0.449886	0.343136	1.3111	0.189823	0.444635	25.4229	37.227	28.1424	18.5074	19.8809	26.7778	Txnrd3	ENSMUSG00000000811	thioredoxin reductase 3 [Source:MGI Symbol;Acc:MGI:2386711]
ENSMUST00000000889	0.93552	-2.0838	2.41951	-0.86125	0.3891	NA	0	0	0.879451	2.92222	1.04637	0.765079	Il4	ENSMUSG00000000869	interleukin 4 [Source:MGI Symbol;Acc:MGI:96556]
ENSMUST00000000894	0.464253	-2.28549	3.67161	-0.622477	0.533628	NA	0	0	0	0.974075	1.04637	0.765079	E2f1	ENSMUSG00000027490	E2F transcription factor 1 [Source:MGI Symbol;Acc:MGI:101941]
ENSMUST00000000896	2.57946	-0.0444103	1.1765	-0.0377477	0.969889	NA	0.977805	1.28369	5.27671	0.974075	3.1391	3.8254	Pxmp4	ENSMUSG00000000876	peroxisomal membrane protein 4 [Source:MGI Symbol;Acc:MGI:1891701]
ENSMUST00000000926	0.954582	-1.07348	2.54205	-0.422289	0.672814	NA	0	0	1.7589	2.92222	1.04637	0	Vpreb3	ENSMUSG00000000903	pre-B lymphocyte gene 3 [Source:MGI Symbol;Acc:MGI:98938]
ENSMUST00000000939	78.1534	0.108542	0.195911	0.554038	0.579553	0.792913	72.3576	86.0072	85.3068	71.1075	75.3383	78.8032	Hip1r	ENSMUSG00000000915	huntingtin interacting protein 1 related [Source:MGI Symbol;Acc:MGI:1352504]
ENSMUST00000000958	6.46344	0.227079	0.705362	0.321933	0.747504	NA	3.91122	6.41845	10.5534	2.92222	7.32456	7.65079	Top1mt	ENSMUSG00000000934	DNA topoisomerase 1, mitochondrial [Source:MGI Symbol;Acc:MGI:1920210]
ENSMUST00000000985	43.8048	0.0914701	0.264334	0.34604	0.729313	0.880064	39.1122	55.1987	42.2137	37.0148	41.8546	47.4349	Oxa1l	ENSMUSG00000000959	oxidase assembly 1-like [Source:MGI Symbol;Acc:MGI:1916339]
ENSMUST00000001027	9.87507	-0.375136	0.570706	-0.657319	0.510976	0.746212	7.82244	5.13476	12.3123	15.5852	11.51	6.88572	Aox1	ENSMUSG00000063558	aldehyde oxidase 1 [Source:MGI Symbol;Acc:MGI:88035]
ENSMUST00000001042	24.7345	-0.801049	0.36576	-2.19009	0.0285176	0.131704	17.6005	16.688	19.3479	40.9111	32.4373	21.4222	Ilf2	ENSMUSG00000001016	interleukin enhancer binding factor 2 [Source:MGI Symbol;Acc:MGI:1915031]
ENSMUST00000001059	1.89476	1.48055	1.612	0.918456	0.35838	NA	1.95561	6.41845	0	1.94815	1.04637	0	Ern1	ENSMUSG00000020715	endoplasmic reticulum (ER) to nucleus signalling 1 [Source:MGI Symbol;Acc:MGI:1930134]
ENSMUST00000001079	11.982	0.928125	0.527448	1.75965	0.0784667	0.26178	22.4895	10.2695	14.0712	12.663	6.27819	6.12064	Sec24b	ENSMUSG00000001052	Sec24 related gene family, member B (S. cerevisiae) [Source:MGI Symbol;Acc:MGI:2139764]
ENSMUST00000001080	16.581	0.828163	0.465197	1.78024	0.0750364	0.254579	32.2676	21.8227	9.67397	11.6889	12.5564	11.4762	N4bp3	ENSMUSG00000001053	NEDD4 binding protein 3 [Source:MGI Symbol;Acc:MGI:2442218]
ENSMUST00000001081	0.309543	1.89901	4.04988	0.468904	0.639138	NA	0.977805	0	0.879451	0	0	0	Rmnd5b	ENSMUSG00000001054	required for meiotic nuclear division 5 homolog B [Source:MGI Symbol;Acc:MGI:1913339]
ENSMUST00000001122	0.649383	-2.76659	3.69326	-0.749091	0.453802	NA	0	0	0	3.8963	0	0	Slc13a2	ENSMUSG00000001095	solute carrier family 13 (sodium-dependent dicarboxylate transporter), member 2 [Source:MGI Symbol;Acc:MGI:1276558]
ENSMUST00000001127	16.0367	0.267228	0.452138	0.591033	0.554498	0.775103	15.6449	21.8227	14.9507	20.4556	15.6955	7.65079	Poldip2	ENSMUSG00000001100	polymerase (DNA-directed), delta interacting protein 2 [Source:MGI Symbol;Acc:MGI:1915061]
ENSMUST00000001147	6.42856	-0.159711	0.696369	-0.229349	0.818598	NA	9.77805	3.85107	4.39726	6.81852	8.37092	5.35556	Col6a1	ENSMUSG00000001119	collagen, type VI, alpha 1 [Source:MGI Symbol;Acc:MGI:88459]
ENSMUST00000001156	0.545507	-1.07822	3.7374	-0.288494	0.772969	NA	0.977805	0	0	0	0	2.29524	Cfp	ENSMUSG00000001128	complement factor properdin [Source:MGI Symbol;Acc:MGI:97545]
ENSMUST00000001172	0.325313	0.167149	4.08047	0.0409631	0.967325	NA	0.977805	0	0	0.974075	0	0	Ankrd39	ENSMUSG00000079610	ankyrin repeat domain 39 [Source:MGI Symbol;Acc:MGI:1914816]
ENSMUST00000001181	1.294	-0.513957	1.83025	-0.280812	0.778854	NA	1.95561	1.28369	0	1.94815	1.04637	1.53016	Col6a2	ENSMUSG00000020241	collagen, type VI, alpha 2 [Source:MGI Symbol;Acc:MGI:88460]
ENSMUST00000001184	56.7527	-0.064803	0.245996	-0.263431	0.792218	0.909435	61.6017	52.6313	51.8876	40.9111	75.3383	58.146	Mxd1	ENSMUSG00000001156	MAX dimerization protein 1 [Source:MGI Symbol;Acc:MGI:96908]
ENSMUST00000001185	39.1901	-0.132567	0.296792	-0.446665	0.655117	0.838457	38.1344	51.3476	23.7452	46.7556	37.6691	37.4889	Gmcl1	ENSMUSG00000001157	germ cell-less, spermatogenesis associated 1 [Source:MGI Symbol;Acc:MGI:1345156]
ENSMUST00000001204	0.614551	-2.69229	3.46367	-0.777295	0.436985	NA	0	0	0	2.92222	0	0.765079	Calm1	ENSMUSG00000001175	calmodulin 1 [Source:MGI Symbol;Acc:MGI:88251]
ENSMUST00000001240	28.7083	0.359958	0.356302	1.01026	0.312369	0.583625	38.1344	43.6455	15.8301	25.3259	24.0664	25.2476	Agpat3	ENSMUSG00000001211	1-acylglycerol-3-phosphate O-acyltransferase 3 [Source:MGI Symbol;Acc:MGI:1336186]
ENSMUST00000001253	1.39474	-1.80053	2.07557	-0.867489	0.385674	NA	0	0	1.7589	5.84445	0	0.765079	Slc26a4	ENSMUSG00000020651	solute carrier family 26, member 4 [Source:MGI Symbol;Acc:MGI:1346029]
ENSMUST00000001254	0.685528	-2.8351	3.27186	-0.866511	0.38621	NA	0	0	0	0.974075	3.1391	0	Slc26a3	ENSMUSG00000001225	solute carrier family 26, member 3 [Source:MGI Symbol;Acc:MGI:107181]
ENSMUST00000001258	0.274088	0.167149	4.08047	0.0409631	0.967325	NA	0	0	0.879451	0	0	0.765079	Uhrf1	ENSMUSG00000001228	ubiquitin-like, containing PHD and RING finger domains, 1 [Source:MGI Symbol;Acc:MGI:1338889]
ENSMUST00000001319	18.2144	0.101542	0.404795	0.250848	0.801932	0.911801	23.4673	19.2553	14.0712	19.4815	14.6491	18.3619	Efnb2	ENSMUSG00000001300	ephrin B2 [Source:MGI Symbol;Acc:MGI:105097]
ENSMUST00000001326	19.2509	0.119159	0.446524	0.266859	0.789578	0.908166	35.201	14.1206	10.5534	24.3519	16.7418	14.5365	Sp1	ENSMUSG00000001280	trans-acting transcription factor 1 [Source:MGI Symbol;Acc:MGI:98372]
ENSMUST00000001327	1.55141	3.09538	1.84686	1.67603	0.093733	NA	2.93341	3.85107	1.7589	0	0	0.765079	Itgb7	ENSMUSG00000001281	integrin beta 7 [Source:MGI Symbol;Acc:MGI:96616]
ENSMUST00000001384	4.83698	-2.64675	1.10731	-2.39025	0.0168367	NA	1.95561	0	1.7589	3.8963	19.8809	1.53016	Cnn1	ENSMUSG00000001349	calponin 1 [Source:MGI Symbol;Acc:MGI:104979]
ENSMUST00000001402	7.51504	-0.652366	0.656839	-0.99319	0.320618	NA	3.91122	6.41845	7.03561	8.76667	13.6027	5.35556	Fbxo9	ENSMUSG00000001366	f-box protein 9 [Source:MGI Symbol;Acc:MGI:1918788]
ENSMUST00000001416	9.09017	-0.433433	0.577651	-0.750337	0.453052	0.705195	10.7559	5.13476	7.03561	11.6889	11.51	8.41587	Hars	ENSMUSG00000001380	histidyl-tRNA synthetase [Source:MGI Symbol;Acc:MGI:108087]
ENSMUST00000001419	4.70363	-0.590377	0.819576	-0.720344	0.471313	NA	4.88902	3.85107	2.63835	6.81852	3.1391	6.88572	Zmat2	ENSMUSG00000001383	zinc finger, matrin type 2 [Source:MGI Symbol;Acc:MGI:1913742]
ENSMUST00000001439	4.48605	0.559313	0.836046	0.668998	0.503497	NA	2.93341	5.13476	7.91506	2.92222	4.18546	3.8254	Ube2c	ENSMUSG00000001403	ubiquitin-conjugating enzyme E2C [Source:MGI Symbol;Acc:MGI:1915862]
ENSMUST00000001451	51.0328	-0.291593	0.252063	-1.15683	0.247344	0.513296	51.8237	38.5107	46.6109	71.1075	49.1792	48.9651	Smg5	ENSMUSG00000001415	Smg-5 homolog, nonsense mediated mRNA decay factor (C. elegans) [Source:MGI Symbol;Acc:MGI:2447364]
ENSMUST00000001455	6.73192	0.643192	0.672057	0.957049	0.338542	NA	9.77805	7.70214	7.03561	6.81852	5.23183	3.8254	Mef2d	ENSMUSG00000001419	myocyte enhancer factor 2D [Source:MGI Symbol;Acc:MGI:99533]
ENSMUST00000001456	1.06862	-0.23822	2.31725	-0.102803	0.918119	NA	2.93341	0	0	1.94815	0	1.53016	Tmem79	ENSMUSG00000001420	transmembrane protein 79 [Source:MGI Symbol;Acc:MGI:1919163]
ENSMUST00000001460	3.01217	0.235829	1.05669	0.223176	0.823398	NA	3.91122	5.13476	0.879451	1.94815	3.1391	3.06032	Snd1	ENSMUSG00000001424	staphylococcal nuclease and tudor domain containing 1 [Source:MGI Symbol;Acc:MGI:1929266]
ENSMUST00000001479	171.049	-0.171762	0.152755	-1.12443	0.260832	0.530138	144.715	177.149	161.819	216.245	149.63	176.733	Kpnb1	ENSMUSG00000001440	karyopherin (importin) beta 1 [Source:MGI Symbol;Acc:MGI:107532]
ENSMUST00000001480	9.57573	-0.0554746	0.560038	-0.099055	0.921095	0.963594	12.7115	6.41845	8.79451	7.7926	12.5564	9.18095	Npepps	ENSMUSG00000001441	aminopeptidase puromycin sensitive [Source:MGI Symbol;Acc:MGI:1101358]
ENSMUST00000001484	0.912736	-2.04677	2.4274	-0.843196	0.399119	NA	0	0	0.879451	0.974075	2.09273	1.53016	Tbx21	ENSMUSG00000001444	T-box 21 [Source:MGI Symbol;Acc:MGI:1888984]
ENSMUST00000001485	31.2319	-0.139648	0.312554	-0.446796	0.655022	0.838457	23.4673	34.6596	31.6603	32.1445	27.2055	38.254	Mrpl10	ENSMUSG00000001445	mitochondrial ribosomal protein L10 [Source:MGI Symbol;Acc:MGI:1333801]
ENSMUST00000001497	8.61999	0.239719	0.607778	0.394419	0.693272	NA	14.6671	6.41845	7.03561	5.84445	6.27819	11.4762	Cideb	ENSMUSG00000022219	cell death-inducing DNA fragmentation factor, alpha subunit-like effector B [Source:MGI Symbol;Acc:MGI:1270844]
ENSMUST00000001507	10.6515	0.348864	0.538576	0.647754	0.517144	0.749816	6.84463	14.1206	14.9507	6.81852	10.4637	10.7111	Cyp51	ENSMUSG00000001467	cytochrome P450, family 51 [Source:MGI Symbol;Acc:MGI:106040]
ENSMUST00000001513	54.131	0.424194	0.250804	1.69134	0.0907726	0.284543	55.7349	69.3192	60.6822	60.3926	44.9937	33.6635	Tubb6	ENSMUSG00000001473	tubulin, beta 6 class V [Source:MGI Symbol;Acc:MGI:1915201]
ENSMUST00000001520	8.89293	0.539196	0.588011	0.916982	0.359152	NA	7.82244	7.70214	15.8301	7.7926	7.32456	6.88572	Afg3l1	ENSMUSG00000031967	AFG3-like AAA ATPase 1 [Source:MGI Symbol;Acc:MGI:1928277]
ENSMUST00000001534	5.9404	0.785361	0.755181	1.03996	0.298357	NA	5.86683	11.5532	5.27671	7.7926	2.09273	3.06032	Sost	ENSMUSG00000001494	sclerostin [Source:MGI Symbol;Acc:MGI:1921749]
ENSMUST00000001547	10.2026	-1.94428	0.620348	-3.13418	0.00172338	0.0145821	3.91122	6.41845	2.63835	22.4037	13.6027	12.2413	Col1a1	ENSMUSG00000001506	collagen, type I, alpha 1 [Source:MGI Symbol;Acc:MGI:88467]
ENSMUST00000001562	2.36251	0.183554	1.37732	0.133269	0.89398	NA	0	5.13476	2.63835	0	1.04637	5.35556	Tulp3	ENSMUSG00000001521	tubby-like protein 3 [Source:MGI Symbol;Acc:MGI:1329045]
ENSMUST00000001566	16.5083	0.321375	0.438561	0.732793	0.463685	0.713042	20.5339	19.2553	15.8301	13.637	8.37092	21.4222	Tubb5	ENSMUSG00000001525	tubulin, beta 5 class I [Source:MGI Symbol;Acc:MGI:107812]
ENSMUST00000001583	12.8099	-0.719544	0.502626	-1.43157	0.152267	0.389493	9.77805	11.5532	7.91506	23.3778	10.4637	13.7714	Ell2	ENSMUSG00000001542	elongation factor RNA polymerase II 2 [Source:MGI Symbol;Acc:MGI:2183438]
ENSMUST00000001595	1.95531	-1.00979	1.47988	-0.682349	0.495018	NA	1.95561	0	1.7589	0.974075	6.27819	0.765079	Fkbp10	ENSMUSG00000001555	FK506 binding protein 10 [Source:MGI Symbol;Acc:MGI:104769]
ENSMUST00000001599	781.873	0.194716	0.0803645	2.42291	0.0153967	0.084743	864.38	824.129	813.493	728.608	765.939	694.692	Klhl10	ENSMUSG00000001558	kelch-like 10 [Source:MGI Symbol;Acc:MGI:2181067]
ENSMUST00000001611	10.7069	-0.652352	0.54316	-1.20103	0.229739	0.495094	4.88902	7.70214	12.3123	10.7148	12.5564	16.0667	Nom1	ENSMUSG00000001569	nucleolar protein with MIF4G domain 1 [Source:MGI Symbol;Acc:MGI:1861749]
ENSMUST00000001619	3.19563	-1.38598	1.11358	-1.24462	0.213271	NA	0.977805	2.56738	1.7589	2.92222	9.41729	1.53016	Ergic1	ENSMUSG00000001576	endoplasmic reticulum-golgi intermediate compartment (ERGIC) 1 [Source:MGI Symbol;Acc:MGI:1914708]
ENSMUST00000001620	3.1314	-1.53431	1.17667	-1.30394	0.192254	NA	0	1.28369	3.51781	1.94815	2.09273	9.94603	Fxr1	ENSMUSG00000027680	fragile X mental retardation gene 1, autosomal homolog [Source:MGI Symbol;Acc:MGI:104860]
ENSMUST00000001626	0.33674	-1.80881	4.02839	-0.449015	0.65342	NA	0	0	0	0.974075	1.04637	0	Tnk1	ENSMUSG00000001583	tyrosine kinase, non-receptor, 1 [Source:MGI Symbol;Acc:MGI:1930958]
ENSMUST00000001631	1.05198	-0.142218	2.20037	-0.0646338	0.948466	NA	0	1.28369	1.7589	0.974075	0	2.29524	Acap1	ENSMUSG00000001588	ArfGAP with coiled-coil, ankyrin repeat and PH domains 1 [Source:MGI Symbol;Acc:MGI:2388270]
ENSMUST00000001652	1.59873	0.329243	1.71397	0.192093	0.847669	NA	0	0	5.27671	0.974075	1.04637	2.29524	Bdkrb2	ENSMUSG00000021070	bradykinin receptor, beta 2 [Source:MGI Symbol;Acc:MGI:102845]
ENSMUST00000001672	2.98702	0.846785	1.04381	0.811248	0.417223	NA	2.93341	5.13476	3.51781	1.94815	2.09273	2.29524	Ifrd1	ENSMUSG00000001627	interferon-related developmental regulator 1 [Source:MGI Symbol;Acc:MGI:1316717]
ENSMUST00000001675	1.38643	-0.598813	1.88633	-0.317448	0.750903	NA	0	2.56738	0.879451	0	1.04637	3.8254	Stk38l	ENSMUSG00000001630	serine/threonine kinase 38 like [Source:MGI Symbol;Acc:MGI:1922250]
ENSMUST00000001699	0.255026	-1.46206	4.06074	-0.360047	0.718812	NA	0	0	0	0	0	1.53016	Hoxc10	ENSMUSG00000022484	homeobox C10 [Source:MGI Symbol;Acc:MGI:96192]
ENSMUST00000001700	2.17254	3.61309	1.61751	2.23374	0.0255	NA	2.93341	3.85107	5.27671	0.974075	0	0	Hoxc13	ENSMUSG00000001655	homeobox C13 [Source:MGI Symbol;Acc:MGI:99560]
ENSMUST00000001706	1.97002	2.38173	1.55616	1.53051	0.12589	NA	1.95561	2.56738	5.27671	0.974075	1.04637	0	Hoxc9	ENSMUSG00000036139	homeobox C9 [Source:MGI Symbol;Acc:MGI:96199]
ENSMUST00000001712	37.3102	-0.0908817	0.281244	-0.323142	0.746588	0.889406	36.1788	38.5107	34.2986	37.0148	33.4837	44.3746	Cabin1	ENSMUSG00000020196	calcineurin binding protein 1 [Source:MGI Symbol;Acc:MGI:1298375]
ENSMUST00000001715	5.93265	-0.471068	0.745655	-0.631751	0.527549	NA	1.95561	8.98583	4.39726	5.84445	5.23183	9.18095	Gstt3	ENSMUSG00000001665	glutathione S-transferase, theta 3 [Source:MGI Symbol;Acc:MGI:2143526]
ENSMUST00000001716	1.42814	-0.908046	1.98341	-0.45782	0.647082	NA	2.93341	0	0	4.87037	0	0.765079	Ddt	ENSMUSG00000001666	D-dopachrome tautomerase [Source:MGI Symbol;Acc:MGI:1298381]
ENSMUST00000001720	2.53261	-1.75751	1.34731	-1.30446	0.192077	NA	0	3.85107	0	3.8963	2.09273	5.35556	Tat	ENSMUSG00000001670	tyrosine aminotransferase [Source:MGI Symbol;Acc:MGI:98487]
ENSMUST00000001724	14.7442	0.489495	0.448148	1.09226	0.274719	0.545235	20.5339	17.9717	13.1918	11.6889	13.6027	11.4762	Ddx18	ENSMUSG00000001674	DEAD (Asp-Glu-Ala-Asp) box polypeptide 18 [Source:MGI Symbol;Acc:MGI:1914192]
ENSMUST00000001780	5.27748	0.768748	0.770092	0.998255	0.318156	NA	6.84463	5.13476	7.91506	1.94815	5.23183	4.59048	Akt1	ENSMUSG00000001729	thymoma viral proto-oncogene 1 [Source:MGI Symbol;Acc:MGI:87986]
ENSMUST00000001802	18.0334	0.0178099	0.405077	0.0439667	0.964931	0.98389	19.5561	17.9717	16.7096	22.4037	17.7882	13.7714	Naglu	ENSMUSG00000001751	alpha-N-acetylglucosaminidase (Sanfilippo disease IIIB) [Source:MGI Symbol;Acc:MGI:1351641]
ENSMUST00000001809	3.31532	-1.53855	1.0826	-1.42115	0.155272	NA	0	2.56738	2.63835	3.8963	3.1391	7.65079	Pabpc1	ENSMUSG00000022283	poly(A) binding protein, cytoplasmic 1 [Source:MGI Symbol;Acc:MGI:1349722]
ENSMUST00000001812	13.2973	-0.212277	0.475772	-0.446175	0.655471	0.838457	12.7115	14.1206	10.5534	10.7148	12.5564	19.127	Smo	ENSMUSG00000001761	smoothened, frizzled class receptor [Source:MGI Symbol;Acc:MGI:108075]
ENSMUST00000001818	49.2374	-0.35937	0.254124	-1.41415	0.157317	0.397605	37.1566	42.3618	49.2493	49.6778	68.0137	48.9651	Crnkl1	ENSMUSG00000001767	crooked neck pre-mRNA splicing factor 1 [Source:MGI Symbol;Acc:MGI:1914127]
ENSMUST00000001825	3.63079	0.808679	0.936133	0.863851	0.38767	NA	3.91122	3.85107	6.15616	1.94815	2.09273	3.8254	Chordc1	ENSMUSG00000001774	cysteine and histidine-rich domain (CHORD)-containing, zinc-binding protein 1 [Source:MGI Symbol;Acc:MGI:1914167]
ENSMUST00000001834	14.47	-0.980297	0.467767	-2.09569	0.0361093	0.155299	9.77805	12.8369	7.03561	15.5852	20.9273	20.6571	Rtcb	ENSMUSG00000001783	RNA 2',3'-cyclic phosphate and 5'-OH ligase [Source:MGI Symbol;Acc:MGI:106379]
ENSMUST00000001836	14.3497	-2.39735e-05	0.446214	-5.37265e-05	0.999957	0.999957	12.7115	15.4043	14.9507	14.6111	14.6491	13.7714	Pwp1	ENSMUSG00000001785	PWP1 homolog, endonuclein [Source:MGI Symbol;Acc:MGI:1914735]
ENSMUST00000001867	0.959304	0.160316	2.33567	0.068638	0.945278	NA	0	1.28369	1.7589	1.94815	0	0.765079	Evx2	ENSMUSG00000001815	even-skipped homeobox 2 [Source:MGI Symbol;Acc:MGI:95462]
ENSMUST00000001884	3.08317	0.229335	1.0556	0.217256	0.828009	NA	5.86683	1.28369	2.63835	1.94815	5.23183	1.53016	Clpb	ENSMUSG00000001829	ClpB caseinolytic peptidase B [Source:MGI Symbol;Acc:MGI:1100517]
ENSMUST00000001900	2.19335	1.88275	1.37711	1.36718	0.17157	NA	2.93341	3.85107	3.51781	0	2.09273	0.765079	Zdhhc4	ENSMUSG00000001844	zinc finger, DHHC domain containing 4 [Source:MGI Symbol;Acc:MGI:1920131]
ENSMUST00000001920	1.0757	-1.239	2.09094	-0.592559	0.553476	NA	0.977805	0	0.879451	0.974075	2.09273	1.53016	Aif1l	ENSMUSG00000001864	allograft inflammatory factor 1-like [Source:MGI Symbol;Acc:MGI:1919598]
ENSMUST00000001950	82.2913	-0.356825	0.19318	-1.84711	0.064731	0.229972	82.1356	65.4682	68.5972	86.6927	95.2192	95.6349	Tollip	ENSMUSG00000025139	toll interacting protein [Source:MGI Symbol;Acc:MGI:1891808]
ENSMUST00000001963	41.3054	-0.243892	0.269369	-0.905421	0.365243	0.634173	35.201	41.0781	37.8164	44.8074	37.6691	51.2603	Ace	ENSMUSG00000020681	angiotensin I converting enzyme (peptidyl-dipeptidase A) 1 [Source:MGI Symbol;Acc:MGI:87874]
ENSMUST00000001964	9.97302	-0.42882	0.5655	-0.758303	0.44827	0.702127	5.86683	14.1206	6.15616	9.74075	9.41729	14.5365	Ace	ENSMUSG00000020681	angiotensin I converting enzyme (peptidyl-dipeptidase A) 1 [Source:MGI Symbol;Acc:MGI:87874]
ENSMUST00000001965	2.09651	0.679682	1.38084	0.492222	0.622562	NA	0	5.13476	2.63835	1.94815	2.09273	0.765079	Kcnh6	ENSMUSG00000001901	potassium voltage-gated channel, subfamily H (eag-related), member 6 [Source:MGI Symbol;Acc:MGI:2684139]
ENSMUST00000001974	0.38254	-2.03581	4.01094	-0.507563	0.61176	NA	0	0	0	0	0	2.29524	Trmt1	ENSMUSG00000001909	tRNA methyltransferase 1 [Source:MGI Symbol;Acc:MGI:1289155]
ENSMUST00000001975	15.4851	-0.050053	0.46653	-0.107288	0.91456	0.961208	6.84463	17.9717	21.1068	15.5852	11.51	19.8921	Nacc1	ENSMUSG00000001910	nucleus accumbens associated 1, BEN and BTB (POZ) domain containing [Source:MGI Symbol;Acc:MGI:1914080]
ENSMUST00000001984	0.255026	-1.46206	4.06074	-0.360047	0.718812	NA	0	0	0	0	0	1.53016	Ceacam9	ENSMUSG00000007209	carcinoembryonic antigen-related cell adhesion molecule 9 [Source:MGI Symbol;Acc:MGI:1347247]
ENSMUST00000001989	0.602291	1.32914	3.57349	0.371946	0.709933	NA	0	2.56738	0	0	1.04637	0	Uba1	ENSMUSG00000001924	ubiquitin-like modifier activating enzyme 1 [Source:MGI Symbol;Acc:MGI:98890]
ENSMUST00000002007	1.06807	-3.48888	2.31753	-1.50543	0.132213	NA	0	0	0	0.974075	3.1391	2.29524	Siae	ENSMUSG00000001942	sialic acid acetylesterase [Source:MGI Symbol;Acc:MGI:104803]
ENSMUST00000002011	0.488902	2.53872	3.9999	0.634697	0.525626	NA	2.93341	0	0	0	0	0	Esam	ENSMUSG00000001946	endothelial cell-specific adhesion molecule [Source:MGI Symbol;Acc:MGI:1916774]
ENSMUST00000002029	1.48637	-0.277234	1.6938	-0.163675	0.869987	NA	1.95561	1.28369	0.879451	0.974075	0	3.8254	Emd	ENSMUSG00000001964	emerin [Source:MGI Symbol;Acc:MGI:108117]
ENSMUST00000002043	5.07328	-0.572667	0.803389	-0.712814	0.475961	NA	0.977805	5.13476	6.15616	6.81852	5.23183	6.12064	Ccdc47	ENSMUSG00000078622	coiled-coil domain containing 47 [Source:MGI Symbol;Acc:MGI:1914413]
ENSMUST00000002044	23.5863	0.326056	0.367282	0.887755	0.374673	0.641171	22.4895	25.6738	29.9014	21.4296	28.2519	13.7714	Map3k3	ENSMUSG00000020700	mitogen-activated protein kinase kinase kinase 3 [Source:MGI Symbol;Acc:MGI:1346874]
ENSMUST00000002048	9.25833	0.506296	0.600379	0.843295	0.399063	0.660192	6.84463	19.2553	7.03561	8.76667	5.23183	8.41587	Taco1	ENSMUSG00000001983	translational activator of mitochondrially encoded cytochrome c oxidase I [Source:MGI Symbol;Acc:MGI:1917457]
ENSMUST00000002063	3.25657	-2.32832	1.19398	-1.95005	0.0511705	NA	0	2.56738	0.879451	3.8963	8.37092	3.8254	Ap4e1	ENSMUSG00000001998	adaptor-related protein complex AP-4, epsilon 1 [Source:MGI Symbol;Acc:MGI:1336993]
ENSMUST00000002064	1.79699	0.357787	1.4144	0.252961	0.800298	NA	2.93341	1.28369	1.7589	1.94815	2.09273	0.765079	Blvra	ENSMUSG00000001999	biliverdin reductase A [Source:MGI Symbol;Acc:MGI:88170]
ENSMUST00000002073	0.417994	-0.500283	4.06074	-0.1232	0.901949	NA	0.977805	0	0	0	0	1.53016	Ltbp2	ENSMUSG00000002020	latent transforming growth factor beta binding protein 2 [Source:MGI Symbol;Acc:MGI:99502]
ENSMUST00000002084	17.1449	-0.595707	0.415678	-1.4331	0.151831	0.38893	10.7559	15.4043	14.9507	20.4556	19.8809	21.4222	Abcd1	ENSMUSG00000031378	ATP-binding cassette, sub-family D (ALD), member 1 [Source:MGI Symbol;Acc:MGI:1349215]
ENSMUST00000002091	13.587	-0.231415	0.467188	-0.495336	0.620363	0.818043	12.7115	15.4043	9.67397	11.6889	16.7418	15.3016	Bcap31	ENSMUSG00000002015	B cell receptor associated protein 31 [Source:MGI Symbol;Acc:MGI:1350933]
ENSMUST00000002101	0.855793	3.30617	3.15572	1.04767	0.294789	NA	0	5.13476	0	0	0	0	Cd3g	ENSMUSG00000002033	CD3 antigen, gamma polypeptide [Source:MGI Symbol;Acc:MGI:88333]
ENSMUST00000002121	61.9422	-0.306122	0.238937	-1.28118	0.20013	0.458806	54.7571	51.3476	60.6822	63.3149	51.2719	90.2794	Supt6	ENSMUSG00000002052	SPT6, histone chaperone and transcription elongation factor [Source:MGI Symbol;Acc:MGI:107726]
ENSMUST00000002128	0.290481	0.167149	4.08047	0.0409631	0.967325	NA	0.977805	0	0	0	0	0.765079	Rab34	ENSMUSG00000002059	RAB34, member RAS oncogene family [Source:MGI Symbol;Acc:MGI:104606]
ENSMUST00000002133	12.4558	-0.588037	0.540476	-1.088	0.276596	0.547719	4.88902	8.98583	15.8301	22.4037	7.32456	15.3016	Sdf2	ENSMUSG00000002064	stromal cell derived factor 2 [Source:MGI Symbol;Acc:MGI:108019]
ENSMUST00000002152	2.10847	1.76949	1.53603	1.152	0.249323	NA	0	8.98583	0.879451	0.974075	1.04637	0.765079	Bbc3	ENSMUSG00000002083	BCL2 binding component 3 [Source:MGI Symbol;Acc:MGI:2181667]
ENSMUST00000002171	297.109	0.410301	0.114134	3.59491	0.000324508	0.0034977	368.632	304.234	342.986	266.896	245.896	254.006	Psmc3	ENSMUSG00000002102	proteasome (prosome, macropain) 26S subunit, ATPase 3 [Source:MGI Symbol;Acc:MGI:1098754]
ENSMUST00000002198	31.9045	-0.717505	0.319043	-2.24893	0.0245168	0.11797	22.4895	23.1064	26.3835	31.1704	52.3183	35.9587	Sf3a1	ENSMUSG00000002129	splicing factor 3a, subunit 1 [Source:MGI Symbol;Acc:MGI:1914715]
ENSMUST00000002259	27.9824	-0.544715	0.326987	-1.66586	0.0957412	0.294711	18.5783	24.3901	25.5041	33.1185	30.3446	35.9587	Clgn	ENSMUSG00000002190	calmegin [Source:MGI Symbol;Acc:MGI:107472]
ENSMUST00000002275	0.915556	0.844123	2.607	0.323791	0.746096	NA	0.977805	2.56738	0	1.94815	0	0	Vrk3	ENSMUSG00000002205	vaccinia related kinase 3 [Source:MGI Symbol;Acc:MGI:2182465]
ENSMUST00000002291	15.5427	0.5101	0.434823	1.17312	0.240748	0.506662	14.6671	21.8227	18.4685	11.6889	13.6027	13.0064	Paxip1	ENSMUSG00000002221	PAX interacting (with transcription-activation domain) protein 1 [Source:MGI Symbol;Acc:MGI:1890430]
ENSMUST00000002292	22.5877	0.784605	0.387426	2.02517	0.0428494	0.17474	30.312	32.0922	23.7452	7.7926	20.9273	20.6571	Rmnd5a	ENSMUSG00000002222	required for meiotic nuclear division 5 homolog A [Source:MGI Symbol;Acc:MGI:1915727]
ENSMUST00000002298	341.107	0.409919	0.113972	3.59668	0.00032231	0.00347936	369.61	435.171	365.852	261.052	298.214	316.743	Ppm1j	ENSMUSG00000002228	protein phosphatase 1J [Source:MGI Symbol;Acc:MGI:1919137]
ENSMUST00000002305	44.878	-0.303979	0.427905	-0.71039	0.477462	0.723891	36.1788	26.9575	57.1643	40.9111	37.6691	70.3873	Kdm7a	ENSMUSG00000042599	lysine (K)-specific demethylase 7A [Source:MGI Symbol;Acc:MGI:2443388]
ENSMUST00000002320	0.737439	3.10671	2.89258	1.07403	0.28281	NA	0.977805	2.56738	0.879451	0	0	0	Ppard	ENSMUSG00000002250	peroxisome proliferator activator receptor delta [Source:MGI Symbol;Acc:MGI:101884]
ENSMUST00000002327	0.274088	0.167149	4.08047	0.0409631	0.967325	NA	0	0	0.879451	0	0	0.765079	Def6	ENSMUSG00000002257	differentially expressed in FDCP 6 [Source:MGI Symbol;Acc:MGI:1346328]
ENSMUST00000002350	51.6039	-0.491063	0.257925	-1.9039	0.0569237	0.210786	47.9124	28.2412	51.0082	52.6	73.2456	56.6159	Ciao3	ENSMUSG00000002280	cytosolic iron-sulfur assembly component 3 [Source:MGI Symbol;Acc:MGI:1914813]
ENSMUST00000002395	55.1618	-0.514754	0.251887	-2.04359	0.0409941	0.169846	41.0678	39.7944	55.4054	66.2371	48.1328	80.3333	Rec8	ENSMUSG00000002324	REC8 meiotic recombination protein [Source:MGI Symbol;Acc:MGI:1929645]
ENSMUST00000002397	96.2498	0.927232	0.188133	4.92859	8.28244e-07	1.52702e-05	109.514	132.22	136.315	57.4704	78.4774	63.5016	Gmpr2	ENSMUSG00000002326	guanosine monophosphate reductase 2 [Source:MGI Symbol;Acc:MGI:1917903]
ENSMUST00000002412	99.3642	0.116337	0.186635	0.623336	0.533064	0.761691	80.18	111.681	117.847	96.4334	103.59	86.454	Ncan	ENSMUSG00000002341	neurocan [Source:MGI Symbol;Acc:MGI:104694]
ENSMUST00000002413	0.29315	1.84622	4.0531	0.45551	0.648743	NA	0	0	1.7589	0	0	0	Tmem161a	ENSMUSG00000002342	transmembrane protein 161A [Source:MGI Symbol;Acc:MGI:2384577]
ENSMUST00000002418	3.48133	0.658917	1.07649	0.612096	0.540474	NA	7.82244	2.56738	2.63835	0.974075	0	6.88572	Borcs8	ENSMUSG00000002345	BLOC-1 related complex subunit 8 [Source:MGI Symbol;Acc:MGI:1919618]
ENSMUST00000002436	8.92223	-0.0116369	0.586833	-0.0198299	0.984179	NA	11.7337	8.98583	6.15616	10.7148	5.23183	10.7111	Snx9	ENSMUSG00000002365	sorting nexin 9 [Source:MGI Symbol;Acc:MGI:1913866]
ENSMUST00000002457	16.4479	0.570203	0.440477	1.29451	0.195489	0.452459	11.7337	24.3901	22.8657	10.7148	16.7418	12.2413	Bmp8b	ENSMUSG00000002384	bone morphogenetic protein 8b [Source:MGI Symbol;Acc:MGI:107335]
ENSMUST00000002469	0.523183	-2.44534	3.98548	-0.613563	0.539504	NA	0	0	0	0	3.1391	0	Ocel1	ENSMUSG00000002396	occludin/ELL domain containing 1 [Source:MGI Symbol;Acc:MGI:1924340]
ENSMUST00000002473	66.6686	0.438226	0.224502	1.95199	0.0509389	0.194901	59.6461	97.5604	73.8739	51.626	60.6892	56.6159	Babam1	ENSMUSG00000031820	BRISC and BRCA1 A complex member 1 [Source:MGI Symbol;Acc:MGI:1915501]
ENSMUST00000002487	25.7535	-0.172655	0.356798	-0.4839	0.628457	0.822033	22.4895	20.539	29.0219	18.5074	38.7155	25.2476	Braf	ENSMUSG00000002413	Braf transforming gene [Source:MGI Symbol;Acc:MGI:88190]
ENSMUST00000002529	0.325935	1.95736	4.04517	0.483876	0.628474	NA	1.95561	0	0	0	0	0	Prpf6	ENSMUSG00000002455	pre-mRNA splicing factor 6 [Source:MGI Symbol;Acc:MGI:1922946]
ENSMUST00000002532	0.324692	-1.763	4.03225	-0.437225	0.661948	NA	0	0	0	1.94815	0	0	Rgs19	ENSMUSG00000002458	regulator of G-protein signaling 19 [Source:MGI Symbol;Acc:MGI:1915153]
ENSMUST00000002625	0.360524	2.07797	4.03428	0.515078	0.606498	NA	0	1.28369	0.879451	0	0	0	Uck1	ENSMUSG00000002550	uridine-cytidine kinase 1 [Source:MGI Symbol;Acc:MGI:98904]
ENSMUST00000002640	0.452205	-2.25201	3.99662	-0.563479	0.573109	NA	0	0	0	1.94815	0	0.765079	Scin	ENSMUSG00000002565	scinderin [Source:MGI Symbol;Acc:MGI:1306794]
ENSMUST00000002655	11.084	-0.315815	0.559635	-0.564323	0.572535	0.788568	4.88902	12.8369	12.3123	13.637	5.23183	17.5968	Mien1	ENSMUSG00000002580	migration and invasion enhancer 1 [Source:MGI Symbol;Acc:MGI:1913678]
ENSMUST00000002663	0.255026	-1.46206	4.06074	-0.360047	0.718812	NA	0	0	0	0	0	1.53016	Pon1	ENSMUSG00000002588	paraoxonase 1 [Source:MGI Symbol;Acc:MGI:103295]
ENSMUST00000002677	0.797823	1.96569	2.81749	0.697676	0.48538	NA	2.93341	0	0.879451	0.974075	0	0	Axl	ENSMUSG00000002602	AXL receptor tyrosine kinase [Source:MGI Symbol;Acc:MGI:1347244]
ENSMUST00000002678	3.36173	0.593002	1.0142	0.584699	0.55875	NA	3.91122	3.85107	4.39726	0	4.18546	3.8254	Tgfb1	ENSMUSG00000002603	transforming growth factor, beta 1 [Source:MGI Symbol;Acc:MGI:98725]
ENSMUST00000002683	21.4641	-0.350455	0.392649	-0.892539	0.372104	0.63956	11.7337	28.2412	17.589	20.4556	20.9273	29.8381	Ccdc97	ENSMUSG00000002608	coiled-coil domain containing 97 [Source:MGI Symbol;Acc:MGI:1196455]
ENSMUST00000002710	0.776685	0.27081	3.10528	0.0872094	0.930505	NA	0	2.56738	0	0	2.09273	0	Pdcd2l	ENSMUSG00000002635	programmed cell death 2-like [Source:MGI Symbol;Acc:MGI:1915329]
ENSMUST00000002733	161.121	0.186265	0.140491	1.32581	0.184903	0.438237	165.249	183.568	166.216	150.982	153.816	146.895	Gtf2f1	ENSMUSG00000002658	general transcription factor IIF, polypeptide 1 [Source:MGI Symbol;Acc:MGI:1923848]
ENSMUST00000002735	4.1835	-1.08029	0.886667	-1.21837	0.223083	NA	1.95561	2.56738	3.51781	3.8963	6.27819	6.88572	Clpp	ENSMUSG00000002660	caseinolytic mitochondrial matrix peptidase proteolytic subunit [Source:MGI Symbol;Acc:MGI:1858213]
ENSMUST00000002740	1.35389	-0.765798	1.79732	-0.426078	0.670051	NA	0	1.28369	1.7589	0.974075	1.04637	3.06032	Pspn	ENSMUSG00000002664	persephin [Source:MGI Symbol;Acc:MGI:1201684]
ENSMUST00000002765	19.2473	-0.734964	0.394996	-1.86068	0.0627887	0.225704	14.6671	11.5532	16.7096	26.3	24.0664	22.1873	Prkd1	ENSMUSG00000002688	protein kinase D1 [Source:MGI Symbol;Acc:MGI:99879]
ENSMUST00000002808	7.6017	0.172115	0.663841	0.259271	0.795426	NA	7.82244	14.1206	2.63835	6.81852	7.32456	6.88572	Prkra	ENSMUSG00000002731	protein kinase, interferon inducible double stranded RNA dependent activator [Source:MGI Symbol;Acc:MGI:1344375]
ENSMUST00000002809	1.12165	-0.275778	2.12974	-0.129489	0.89697	NA	0	1.28369	1.7589	2.92222	0	0.765079	Fkbp7	ENSMUSG00000002732	FK506 binding protein 7 [Source:MGI Symbol;Acc:MGI:1336879]
ENSMUST00000002818	24.4253	0.0463959	0.354013	0.131057	0.89573	0.955609	21.5117	30.8086	22.8657	18.5074	23.02	29.8381	Ykt6	ENSMUSG00000002741	YKT6 v-SNARE homolog (S. cerevisiae) [Source:MGI Symbol;Acc:MGI:1927550]
ENSMUST00000002825	19.3877	0.199492	0.417348	0.478	0.63265	0.825387	18.5783	10.2695	32.5397	18.5074	18.8346	17.5968	Baz1b	ENSMUSG00000002748	bromodomain adjacent to zinc finger domain, 1B [Source:MGI Symbol;Acc:MGI:1353499]
ENSMUST00000002837	0.820055	-1.84421	2.76634	-0.666662	0.504988	NA	0	0	0.879451	1.94815	2.09273	0	Tmed5	ENSMUSG00000063406	transmembrane p24 trafficking protein 5 [Source:MGI Symbol;Acc:MGI:1921586]
ENSMUST00000002848	12.0541	0.327663	0.512007	0.639957	0.5222	0.753894	11.7337	7.70214	20.2274	11.6889	12.5564	8.41587	Grin2d	ENSMUSG00000002771	glutamate receptor, ionotropic, NMDA2D (epsilon 4) [Source:MGI Symbol;Acc:MGI:95823]
ENSMUST00000002850	1.93037	3.40748	1.69321	2.01244	0.0441736	NA	1.95561	5.13476	3.51781	0.974075	0	0	Abcc6	ENSMUSG00000030834	ATP-binding cassette, sub-family C (CFTR/MRP), member 6 [Source:MGI Symbol;Acc:MGI:1351634]
ENSMUST00000002889	21.5353	-0.834526	0.374331	-2.22938	0.0257885	0.122325	15.6449	12.8369	17.589	26.3	29.2982	27.5429	Flii	ENSMUSG00000002812	flightless I actin binding protein [Source:MGI Symbol;Acc:MGI:1342286]
ENSMUST00000002914	5193.38	0.661152	0.0621843	10.6321	2.11216e-26	1.82689e-24	6136.7	6184.82	6767.38	3839.8	4027.46	4204.11	Chaf1a	ENSMUSG00000002835	chromatin assembly factor 1, subunit A (p150) [Source:MGI Symbol;Acc:MGI:1351331]
ENSMUST00000002923	7.53275	0.170827	0.690279	0.247474	0.804541	NA	3.91122	15.4043	5.27671	3.8963	5.23183	11.4762	Adprh	ENSMUSG00000002844	ADP-ribosylarginine hydrolase [Source:MGI Symbol;Acc:MGI:1098234]
ENSMUST00000002925	1.86732	-1.57162	1.55644	-1.00975	0.312615	NA	0	0	2.63835	3.8963	3.1391	1.53016	Timmdc1	ENSMUSG00000002846	translocase of inner mitochondrial membrane domain containing 1 [Source:MGI Symbol;Acc:MGI:1922139]
ENSMUST00000002926	5.6942	0.290598	0.765217	0.379759	0.704124	NA	3.91122	11.5532	3.51781	5.84445	6.27819	3.06032	Pla1a	ENSMUSG00000002847	phospholipase A1 member A [Source:MGI Symbol;Acc:MGI:1934677]
ENSMUST00000002976	0.928506	-3.28489	2.49417	-1.31703	0.187828	NA	0	0	0	1.94815	2.09273	1.53016	Il17ra	ENSMUSG00000002897	interleukin 17 receptor A [Source:MGI Symbol;Acc:MGI:107399]
ENSMUST00000002979	0.987367	-0.975799	2.49184	-0.391598	0.695355	NA	1.95561	0	0	2.92222	1.04637	0	Lamb1	ENSMUSG00000002900	laminin B1 [Source:MGI Symbol;Acc:MGI:96743]
ENSMUST00000003038	204.587	-0.00413916	0.128078	-0.0323175	0.974219	0.989742	191.65	222.078	200.515	204.556	199.856	208.867	Ap2a2	ENSMUSG00000002957	adaptor-related protein complex 2, alpha 2 subunit [Source:MGI Symbol;Acc:MGI:101920]
ENSMUST00000003049	1.84398	-0.0269624	1.60376	-0.016812	0.986587	NA	0.977805	3.85107	0.879451	0	0	5.35556	Med25	ENSMUSG00000002968	mediator complex subunit 25 [Source:MGI Symbol;Acc:MGI:1922863]
ENSMUST00000003061	2.13013	-0.0264234	1.35729	-0.0194677	0.984468	NA	2.93341	2.56738	0.879451	4.87037	0	1.53016	Bcam	ENSMUSG00000002980	basal cell adhesion molecule [Source:MGI Symbol;Acc:MGI:1929940]
ENSMUST00000003100	0.617842	-0.0744551	3.5126	-0.0211966	0.983089	NA	0	0	1.7589	1.94815	0	0	Cyp2f2	ENSMUSG00000052974	cytochrome P450, family 2, subfamily f, polypeptide 2 [Source:MGI Symbol;Acc:MGI:88608]
ENSMUST00000003117	24.3165	-0.165248	0.366088	-0.451389	0.651709	0.836826	28.3563	23.1064	17.589	34.0926	16.7418	26.0127	Ap1m1	ENSMUSG00000003033	adaptor-related protein complex AP-1, mu subunit 1 [Source:MGI Symbol;Acc:MGI:102776]
ENSMUST00000003121	25.8445	-0.213835	0.3576	-0.597971	0.549859	0.772781	32.2676	20.539	19.3479	22.4037	23.02	37.4889	Rab8a	ENSMUSG00000003037	RAB8A, member RAS oncogene family [Source:MGI Symbol;Acc:MGI:96960]
ENSMUST00000003123	0.61412	1.44644	3.51682	0.411293	0.680858	NA	0	0	2.63835	0	1.04637	0	Fam32a	ENSMUSG00000003039	family with sequence similarity 32, member A [Source:MGI Symbol;Acc:MGI:1915172]
ENSMUST00000003135	0.855793	3.30617	3.15572	1.04767	0.294789	NA	0	5.13476	0	0	0	0	Elf3	ENSMUSG00000003051	E74-like factor 3 [Source:MGI Symbol;Acc:MGI:1101781]
ENSMUST00000003154	0.38254	-2.03581	4.01094	-0.507563	0.61176	NA	0	0	0	0	0	2.29524	Efna2	ENSMUSG00000003070	ephrin A2 [Source:MGI Symbol;Acc:MGI:102707]
ENSMUST00000003203	1.1327	-2.39939	2.352	-1.02015	0.307656	NA	0	0	0.879451	4.87037	1.04637	0	Cdk12	ENSMUSG00000003119	cyclin-dependent kinase 12 [Source:MGI Symbol;Acc:MGI:1098802]
ENSMUST00000003207	17.8501	-0.112922	0.419638	-0.269094	0.787857	0.907402	16.6227	11.5532	22.8657	12.663	21.9737	21.4222	Lipe	ENSMUSG00000003123	lipase, hormone sensitive [Source:MGI Symbol;Acc:MGI:96790]
ENSMUST00000003238	6.36803	1.50781	0.778611	1.93654	0.0528019	NA	9.77805	5.13476	13.1918	0	6.27819	3.8254	Foxj2	ENSMUSG00000003154	forkhead box J2 [Source:MGI Symbol;Acc:MGI:1926805]
ENSMUST00000003268	12.1142	0.335967	0.493843	0.680312	0.496307	0.735122	15.6449	15.4043	9.67397	9.74075	11.51	10.7111	Sh3gl1	ENSMUSG00000003200	SH3-domain GRB2-like 1 [Source:MGI Symbol;Acc:MGI:700010]
ENSMUST00000003284	1.59562	2.07021	1.81291	1.14192	0.253486	NA	3.91122	3.85107	0	0	1.04637	0.765079	Irf3	ENSMUSG00000003184	interferon regulatory factor 3 [Source:MGI Symbol;Acc:MGI:1859179]
ENSMUST00000003310	169.715	-0.145035	0.145006	-1.0002	0.317215	0.587472	142.76	187.419	154.783	165.593	192.531	175.203	Ranbp2	ENSMUSG00000003226	RAN binding protein 2 [Source:MGI Symbol;Acc:MGI:894323]
ENSMUST00000003312	18.2252	0.0150643	0.454188	0.0331674	0.973541	0.989501	26.4007	16.688	11.4329	15.5852	29.2982	9.94603	Edar	ENSMUSG00000003227	ectodysplasin-A receptor [Source:MGI Symbol;Acc:MGI:1343498]
ENSMUST00000003313	13.3569	-0.0355546	0.479957	-0.0740787	0.940948	0.973111	9.77805	12.8369	16.7096	9.74075	18.8346	12.2413	Grk5	ENSMUSG00000003228	G protein-coupled receptor kinase 5 [Source:MGI Symbol;Acc:MGI:109161]
ENSMUST00000003319	1.64437	-0.568698	1.52513	-0.372886	0.709234	NA	0.977805	1.28369	1.7589	0.974075	1.04637	3.8254	Abcf3	ENSMUSG00000003234	ATP-binding cassette, sub-family F (GCN20), member 3 [Source:MGI Symbol;Acc:MGI:1351656]
ENSMUST00000003320	46.9815	-0.36386	0.251942	-1.44422	0.148677	0.384083	44.0012	43.6455	36.0575	56.4963	48.1328	53.5556	Eif2b5	ENSMUSG00000003235	eukaryotic translation initiation factor 2B, subunit 5 epsilon [Source:MGI Symbol;Acc:MGI:2446176]
ENSMUST00000003369	1.45367	-1.85814	2.00227	-0.928013	0.353401	NA	0	0	1.7589	4.87037	2.09273	0	Plag1	ENSMUSG00000003282	pleiomorphic adenoma gene 1 [Source:MGI Symbol;Acc:MGI:1891916]
ENSMUST00000003386	0.590864	2.78103	3.54845	0.783731	0.433198	NA	0.977805	2.56738	0	0	0	0	Mrpl4	ENSMUSG00000003299	mitochondrial ribosomal protein L4 [Source:MGI Symbol;Acc:MGI:2137210]
ENSMUST00000003438	4.96341	-0.0313942	0.816255	-0.0384612	0.96932	NA	6.84463	6.41845	1.7589	2.92222	4.18546	7.65079	Mob3a	ENSMUSG00000003348	MOB kinase activator 3A [Source:MGI Symbol;Acc:MGI:3050117]
ENSMUST00000003444	116.281	-0.449968	0.171752	-2.61987	0.00879626	0.0549897	85.069	115.532	95.8602	147.085	117.193	136.949	Ccdc65	ENSMUSG00000003354	coiled-coil domain containing 65 [Source:MGI Symbol;Acc:MGI:2146001]
ENSMUST00000003450	14.6141	-0.238309	0.458035	-0.520284	0.602865	0.80679	16.6227	14.1206	9.67397	20.4556	11.51	15.3016	Ddx23	ENSMUSG00000003360	DEAD (Asp-Glu-Ala-Asp) box polypeptide 23 [Source:MGI Symbol;Acc:MGI:1921601]
ENSMUST00000003451	0.707231	-2.90571	3.17672	-0.91469	0.360354	NA	0	0	0	1.94815	0	2.29524	Rnd1	ENSMUSG00000054855	Rho family GTPase 1 [Source:MGI Symbol;Acc:MGI:2444878]
ENSMUST00000003461	1.63853	0.891337	1.64373	0.542265	0.587636	NA	1.95561	0	4.39726	1.94815	0	1.53016	Ogdh	ENSMUSG00000020456	oxoglutarate (alpha-ketoglutarate) dehydrogenase (lipoamide) [Source:MGI Symbol;Acc:MGI:1098267]
ENSMUST00000003469	2.63164	-0.203859	1.22002	-0.167094	0.867296	NA	0	3.85107	3.51781	5.84445	1.04637	1.53016	Cd79a	ENSMUSG00000003379	CD79A antigen (immunoglobulin-associated alpha) [Source:MGI Symbol;Acc:MGI:101774]
ENSMUST00000003501	4.30875	-0.62741	0.929391	-0.675076	0.499627	NA	0.977805	3.85107	5.27671	0.974075	9.41729	5.35556	Elavl3	ENSMUSG00000003410	ELAV like RNA binding protein 3 [Source:MGI Symbol;Acc:MGI:109157]
ENSMUST00000003513	2.63097	-1.61284	1.24977	-1.29051	0.196873	NA	2.93341	0	0.879451	1.94815	3.1391	6.88572	Nosip	ENSMUSG00000003421	nitric oxide synthase interacting protein [Source:MGI Symbol;Acc:MGI:1913644]
ENSMUST00000003521	0.503807	-0.659214	3.59497	-0.183371	0.854507	NA	0	1.28369	0	0.974075	0	0.765079	Rps11	ENSMUSG00000003429	ribosomal protein S11 [Source:MGI Symbol;Acc:MGI:1351329]
ENSMUST00000003536	37.9129	-0.481613	0.280204	-1.71879	0.0856517	0.275264	29.3341	35.9433	29.9014	46.7556	44.9937	40.5492	Med29	ENSMUSG00000003444	mediator complex subunit 29 [Source:MGI Symbol;Acc:MGI:1914474]
ENSMUST00000003554	2.7564	-0.189444	1.14782	-0.165046	0.868908	NA	5.86683	0	1.7589	1.94815	3.1391	3.8254	Casq1	ENSMUSG00000007122	calsequestrin 1 [Source:MGI Symbol;Acc:MGI:1309468]
ENSMUST00000003561	0.348788	-1.85356	4.02474	-0.460542	0.645127	NA	0	0	0	0	2.09273	0	Phyhip	ENSMUSG00000003469	phytanoyl-CoA hydroxylase interacting protein [Source:MGI Symbol;Acc:MGI:1860417]
ENSMUST00000003568	0.590242	1.33016	3.61041	0.368425	0.712557	NA	0	2.56738	0	0.974075	0	0	Crhr2	ENSMUSG00000003476	corticotropin releasing hormone receptor 2 [Source:MGI Symbol;Acc:MGI:894312]
ENSMUST00000003569	2.37867	-2.38	1.48417	-1.60359	0.108804	NA	0	2.56738	0	3.8963	6.27819	1.53016	Inmt	ENSMUSG00000003477	indolethylamine N-methyltransferase [Source:MGI Symbol;Acc:MGI:102963]
ENSMUST00000003572	31.5608	-0.194884	0.318448	-0.611982	0.54055	0.765785	31.2898	26.9575	29.9014	45.7815	24.0664	31.3683	Gars	ENSMUSG00000029777	glycyl-tRNA synthetase [Source:MGI Symbol;Acc:MGI:2449057]
ENSMUST00000003574	0.401602	-0.500283	4.06074	-0.1232	0.901949	NA	0	0	0.879451	0	0	1.53016	Cyp4f18	ENSMUSG00000003484	cytochrome P450, family 4, subfamily f, polypeptide 18 [Source:MGI Symbol;Acc:MGI:1919304]
ENSMUST00000003599	7.64327	0.148775	0.650819	0.228597	0.819182	NA	5.86683	10.2695	7.91506	3.8963	12.5564	5.35556	Pcdhgb6	ENSMUSG00000103088	protocadherin gamma subfamily B, 6 [Source:MGI Symbol;Acc:MGI:1935197]
ENSMUST00000003612	0.255026	-1.46206	4.06074	-0.360047	0.718812	NA	0	0	0	0	0	1.53016	Dusp3	ENSMUSG00000003518	dual specificity phosphatase 3 (vaccinia virus phosphatase VH1-related) [Source:MGI Symbol;Acc:MGI:1919599]
ENSMUST00000003622	2.55322	0.542812	1.27982	0.424133	0.671469	NA	0	3.85107	5.27671	3.8963	0	2.29524	Slc25a1	ENSMUSG00000003528	solute carrier family 25 (mitochondrial carrier, citrate transporter), member 1 [Source:MGI Symbol;Acc:MGI:1345283]
ENSMUST00000003635	3.91135	-0.723924	1.98177	-0.365292	0.714894	NA	0	8.98583	0	8.76667	4.18546	1.53016	Ier3	ENSMUSG00000003541	immediate early response 3 [Source:MGI Symbol;Acc:MGI:104814]
ENSMUST00000003642	0.586301	2.8114	3.89763	0.72131	0.470719	NA	0	0	3.51781	0	0	0	Klc4	ENSMUSG00000003546	kinesin light chain 4 [Source:MGI Symbol;Acc:MGI:1922014]
ENSMUST00000003655	0.816333	-0.738878	3.00823	-0.245619	0.805978	NA	0	0	1.7589	0	3.1391	0	As3mt	ENSMUSG00000003559	arsenic (+3 oxidation state) methyltransferase [Source:MGI Symbol;Acc:MGI:1929882]
ENSMUST00000003659	360.393	0.314265	0.107634	2.91974	0.00350323	0.0258369	399.922	376.121	421.257	355.537	295.075	314.448	Comp	ENSMUSG00000031849	cartilage oligomeric matrix protein [Source:MGI Symbol;Acc:MGI:88469]
ENSMUST00000003677	9.82421	-0.245305	0.54862	-0.447131	0.654781	0.838457	6.84463	11.5532	8.79451	8.76667	11.51	11.4762	Rnf215	ENSMUSG00000003581	ring finger protein 215 [Source:MGI Symbol;Acc:MGI:1918923]
ENSMUST00000003681	11.9262	0.350024	0.504219	0.694191	0.487563	0.729885	8.80024	16.688	14.9507	9.74075	8.37092	13.0064	Sec14l2	ENSMUSG00000003585	SEC14-like lipid binding 2 [Source:MGI Symbol;Acc:MGI:1915065]
ENSMUST00000003687	17.6082	-0.342185	0.409597	-0.83542	0.403481	0.663562	15.6449	14.1206	16.7096	24.3519	15.6955	19.127	Tgfb3	ENSMUSG00000021253	transforming growth factor, beta 3 [Source:MGI Symbol;Acc:MGI:98727]
ENSMUST00000003705	56.389	-0.204114	0.242822	-0.840592	0.400577	0.661273	38.1344	52.6313	65.9589	56.4963	66.9674	58.146	Aven	ENSMUSG00000003604	apoptosis, caspase activation inhibitor [Source:MGI Symbol;Acc:MGI:1921518]
ENSMUST00000003714	4.07771	0.582428	0.91239	0.638354	0.523243	NA	9.77805	1.28369	3.51781	2.92222	3.1391	3.8254	Cp	ENSMUSG00000003617	ceruloplasmin [Source:MGI Symbol;Acc:MGI:88476]
ENSMUST00000003717	4.9522	-1.49014	0.853365	-1.7462	0.0807768	NA	3.91122	0	3.51781	7.7926	8.37092	6.12064	Abcb4	ENSMUSG00000042476	ATP-binding cassette, sub-family B (MDR/TAP), member 4 [Source:MGI Symbol;Acc:MGI:97569]
ENSMUST00000003720	1.22548	2.71267	2.0971	1.29354	0.195825	NA	0.977805	3.85107	1.7589	0	0	0.765079	Crot	ENSMUSG00000003623	carnitine O-octanoyltransferase [Source:MGI Symbol;Acc:MGI:1921364]
ENSMUST00000003754	0.427897	2.30122	4.01629	0.572971	0.566664	NA	0	2.56738	0	0	0	0	Calb2	ENSMUSG00000003657	calbindin 2 [Source:MGI Symbol;Acc:MGI:101914]
ENSMUST00000003759	8.65427	0.529082	0.663317	0.797631	0.425085	NA	15.6449	10.2695	5.27671	4.87037	2.09273	13.7714	Ciao1	ENSMUSG00000003662	cytosolic iron-sulfur protein assembly 1 [Source:MGI Symbol;Acc:MGI:1346998]
ENSMUST00000003762	2.57815	-0.04831	1.23162	-0.0392248	0.968711	NA	0.977805	1.28369	5.27671	4.87037	0	3.06032	Has1	ENSMUSG00000003665	hyaluronan synthase 1 [Source:MGI Symbol;Acc:MGI:106590]
ENSMUST00000003818	8.52033	-0.978138	0.621881	-1.57287	0.115749	NA	6.84463	3.85107	6.15616	11.6889	15.6955	6.88572	Insig2	ENSMUSG00000003721	insulin induced gene 2 [Source:MGI Symbol;Acc:MGI:1920249]
ENSMUST00000003843	0.702229	1.69949	3.02563	0.5617	0.574321	NA	1.95561	1.28369	0	0.974075	0	0	Man1a	ENSMUSG00000003746	mannosidase 1, alpha [Source:MGI Symbol;Acc:MGI:104677]
ENSMUST00000003850	11.0374	-0.612875	0.610915	-1.00321	0.31576	0.586328	8.80024	12.8369	5.27671	11.6889	3.1391	24.4825	Itpkc	ENSMUSG00000003752	inositol 1,4,5-trisphosphate 3-kinase C [Source:MGI Symbol;Acc:MGI:2442554]
ENSMUST00000003870	0.471889	0.940329	3.70719	0.25365	0.799766	NA	0.977805	0	0.879451	0.974075	0	0	Mxi1	ENSMUSG00000025025	MAX interactor 1, dimerization protein [Source:MGI Symbol;Acc:MGI:97245]
ENSMUST00000003911	0.325313	0.167149	4.08047	0.0409631	0.967325	NA	0.977805	0	0	0.974075	0	0	Rad23a	ENSMUSG00000003813	RAD23 homolog A, nucleotide excision repair protein [Source:MGI Symbol;Acc:MGI:105126]
ENSMUST00000003912	25.1917	0.0264985	0.343261	0.0771965	0.938467	0.972757	23.4673	20.539	31.6603	25.3259	27.2055	22.9524	Calr	ENSMUSG00000003814	calreticulin [Source:MGI Symbol;Acc:MGI:88252]
ENSMUST00000003964	0.511134	-2.41324	3.82362	-0.63114	0.527949	NA	0	0	0	0.974075	2.09273	0	Gys1	ENSMUSG00000003865	glycogen synthase 1, muscle [Source:MGI Symbol;Acc:MGI:101805]
ENSMUST00000004036	7.66423	-0.106073	0.648455	-0.163578	0.870063	NA	10.7559	8.98583	2.63835	6.81852	8.37092	8.41587	Efnb3	ENSMUSG00000003934	ephrin B3 [Source:MGI Symbol;Acc:MGI:109196]
ENSMUST00000004051	0.53864	-0.799848	3.77998	-0.211601	0.832418	NA	0	1.28369	0	1.94815	0	0	Hlf	ENSMUSG00000003949	hepatic leukemia factor [Source:MGI Symbol;Acc:MGI:96108]
ENSMUST00000004054	3.38223	0.651393	1.01692	0.640555	0.521812	NA	3.91122	5.13476	3.51781	0	3.1391	4.59048	Kpna1	ENSMUSG00000022905	karyopherin (importin) alpha 1 [Source:MGI Symbol;Acc:MGI:103560]
ENSMUST00000004057	0.325935	1.95736	4.04517	0.483876	0.628474	NA	1.95561	0	0	0	0	0	Fam162a	ENSMUSG00000003955	family with sequence similarity 162, member A [Source:MGI Symbol;Acc:MGI:1917436]
ENSMUST00000004076	1.98654	4.54574	3.64823	1.24601	0.212759	NA	2.93341	8.98583	0	0	0	0	Grm3	ENSMUSG00000003974	glutamate receptor, metabotropic 3 [Source:MGI Symbol;Acc:MGI:1351340]
ENSMUST00000004097	3.69459	-0.400467	0.951789	-0.420752	0.673936	NA	4.88902	0	4.39726	4.87037	4.18546	3.8254	Cux1	ENSMUSG00000029705	cut-like homeobox 1 [Source:MGI Symbol;Acc:MGI:88568]
ENSMUST00000004120	63.1156	-0.232239	0.229448	-1.01216	0.311459	0.583496	45.9568	60.3334	67.7178	81.8223	58.5964	64.2667	Fancl	ENSMUSG00000004018	Fanconi anemia, complementation group L [Source:MGI Symbol;Acc:MGI:1914280]
ENSMUST00000004136	0.29315	1.84622	4.0531	0.45551	0.648743	NA	0	0	1.7589	0	0	0	Gstm3	ENSMUSG00000004038	glutathione S-transferase, mu 3 [Source:MGI Symbol;Acc:MGI:106026]
ENSMUST00000004137	3.11915	1.53742	1.14014	1.34846	0.177511	NA	7.82244	5.13476	0.879451	0.974075	3.1391	0.765079	Gstm7	ENSMUSG00000004035	glutathione S-transferase, mu 7 [Source:MGI Symbol;Acc:MGI:1915562]
ENSMUST00000004156	4.19489	-0.280559	0.860908	-0.325887	0.74451	NA	4.88902	3.85107	2.63835	2.92222	6.27819	4.59048	Map3k11	ENSMUSG00000004054	mitogen-activated protein kinase kinase kinase 11 [Source:MGI Symbol;Acc:MGI:1346880]
ENSMUST00000004172	6.75407	-0.503835	0.686634	-0.733775	0.463086	NA	8.80024	2.56738	5.27671	5.84445	7.32456	10.7111	Hmox2	ENSMUSG00000004070	heme oxygenase 2 [Source:MGI Symbol;Acc:MGI:109373]
ENSMUST00000004173	9861.56	0.816684	0.0617415	13.2275	6.08997e-40	9.9224e-38	11748.3	12487.7	13504.9	7291.92	6976.12	7160.38	Cdip1	ENSMUSG00000004071	cell death inducing Trp53 target 1 [Source:MGI Symbol;Acc:MGI:1913876]
ENSMUST00000004201	0.376294	0.167149	4.08047	0.0409631	0.967325	NA	0	1.28369	0	0.974075	0	0	Col5a3	ENSMUSG00000004098	collagen, type V, alpha 3 [Source:MGI Symbol;Acc:MGI:1858212]
ENSMUST00000004203	0.523491	2.62376	3.46571	0.757063	0.449012	NA	0.977805	1.28369	0.879451	0	0	0	Ppan	ENSMUSG00000004100	peter pan homolog [Source:MGI Symbol;Acc:MGI:2178445]
ENSMUST00000004206	53.1904	-0.406288	0.249283	-1.62983	0.103138	0.307221	43.0234	35.9433	57.1643	50.6519	71.1528	61.2064	Eif3g	ENSMUSG00000070319	eukaryotic translation initiation factor 3, subunit G [Source:MGI Symbol;Acc:MGI:1858258]
ENSMUST00000004208	6.55316	-0.327721	0.686807	-0.477165	0.633244	NA	8.80024	5.13476	3.51781	5.84445	8.37092	7.65079	Angptl2	ENSMUSG00000004105	angiopoietin-like 2 [Source:MGI Symbol;Acc:MGI:1347002]
ENSMUST00000004281	28.3226	0.701531	0.356472	1.96799	0.0490697	0.190567	26.4007	51.3476	28.1424	29.2222	15.6955	19.127	Dyrk2	ENSMUSG00000028630	dual-specificity tyrosine-(Y)-phosphorylation regulated kinase 2 [Source:MGI Symbol;Acc:MGI:1330301]
ENSMUST00000004327	1.36032	0.90042	1.78809	0.503567	0.614566	NA	0.977805	2.56738	1.7589	0	2.09273	0.765079	G6pdx	ENSMUSG00000031400	glucose-6-phosphate dehydrogenase X-linked [Source:MGI Symbol;Acc:MGI:105979]
ENSMUST00000004343	0.869146	0.0685528	2.64653	0.0259029	0.979335	NA	0	0	2.63835	0	1.04637	1.53016	Wars2	ENSMUSG00000004233	tryptophanyl tRNA synthetase 2 (mitochondrial) [Source:MGI Symbol;Acc:MGI:1917810]
ENSMUST00000004381	7.74972	-0.821373	0.65618	-1.25175	0.210661	NA	5.86683	2.56738	7.91506	14.6111	9.41729	6.12064	Lpcat3	ENSMUSG00000004270	lysophosphatidylcholine acyltransferase 3 [Source:MGI Symbol;Acc:MGI:1315211]
ENSMUST00000004396	2.21096	-0.797451	1.40215	-0.568734	0.569537	NA	2.93341	0	1.7589	0	6.27819	2.29524	Atp6v1f	ENSMUSG00000004285	ATPase, H+ transporting, lysosomal V1 subunit F [Source:MGI Symbol;Acc:MGI:1913394]
ENSMUST00000004428	1.03584	-0.309677	2.20047	-0.140732	0.888081	NA	0.977805	0	1.7589	1.94815	0	1.53016	Clcn5	ENSMUSG00000004317	chloride channel, voltage-sensitive 5 [Source:MGI Symbol;Acc:MGI:99486]
ENSMUST00000004453	12.9972	-0.840485	0.484135	-1.73605	0.0825544	0.270089	8.80024	11.5532	7.91506	14.6111	16.7418	18.3619	Gpx6	ENSMUSG00000004341	glutathione peroxidase 6 [Source:MGI Symbol;Acc:MGI:1922762]
ENSMUST00000004470	53.1614	-0.127916	0.243253	-0.525856	0.598989	0.804238	43.0234	50.0639	58.9233	66.2371	50.2255	50.4952	Utp20	ENSMUSG00000004356	UTP20 small subunit processome component [Source:MGI Symbol;Acc:MGI:1917933]
ENSMUST00000004494	12.4352	-0.578051	0.491359	-1.17643	0.239421	0.505306	10.7559	6.41845	12.3123	14.6111	16.7418	13.7714	Sin3b	ENSMUSG00000031622	transcriptional regulator, SIN3B (yeast) [Source:MGI Symbol;Acc:MGI:107158]
ENSMUST00000004505	5.64769	1.25016	0.763305	1.63782	0.10146	NA	5.86683	6.41845	11.4329	2.92222	4.18546	3.06032	Npc1l1	ENSMUSG00000020447	NPC1 like intracellular cholesterol transporter 1 [Source:MGI Symbol;Acc:MGI:2685089]
ENSMUST00000004507	12.6238	-0.43119	0.517225	-0.83366	0.404473	0.663949	6.84463	19.2553	7.03561	11.6889	12.5564	18.3619	Ddx56	ENSMUSG00000004393	DEAD (Asp-Glu-Ala-Asp) box polypeptide 56 [Source:MGI Symbol;Acc:MGI:1277172]
ENSMUST00000004508	19.5237	-0.683311	0.394418	-1.73245	0.0831927	0.271261	12.7115	16.688	15.8301	26.3	18.8346	26.7778	Tmed4	ENSMUSG00000004394	transmembrane p24 trafficking protein 4 [Source:MGI Symbol;Acc:MGI:1915070]
ENSMUST00000004560	1.5542	-0.774433	1.66324	-0.465618	0.641489	NA	0.977805	2.56738	0	2.92222	2.09273	0.765079	Bid	ENSMUSG00000004446	BH3 interacting domain death agonist [Source:MGI Symbol;Acc:MGI:108093]
ENSMUST00000004565	5.30646	0.046233	0.776301	0.0595556	0.95251	NA	2.93341	6.41845	7.03561	3.8963	3.1391	8.41587	Ralb	ENSMUSG00000004451	v-ral simian leukemia viral oncogene B [Source:MGI Symbol;Acc:MGI:1927244]
ENSMUST00000004574	2.49454	-1.5333	1.25885	-1.21801	0.223221	NA	0.977805	0	2.63835	4.87037	4.18546	2.29524	Dnajb11	ENSMUSG00000004460	DnaJ heat shock protein family (Hsp40) member B11 [Source:MGI Symbol;Acc:MGI:1915088]
ENSMUST00000004587	9.97396	-0.705794	0.583411	-1.20977	0.226367	0.490847	11.7337	7.70214	3.51781	16.5593	7.32456	13.0064	Clec11a	ENSMUSG00000004473	C-type lectin domain family 11, member a [Source:MGI Symbol;Acc:MGI:1298219]
ENSMUST00000004614	11.6434	-0.071318	0.515608	-0.138318	0.889989	0.953696	7.82244	12.8369	13.1918	12.663	15.6955	7.65079	Zfp110	ENSMUSG00000058638	zinc finger protein 110 [Source:MGI Symbol;Acc:MGI:1890378]
ENSMUST00000004622	31.2439	0.133116	0.309628	0.429922	0.667252	0.845339	35.201	32.0922	30.7808	37.0148	24.0664	28.3079	Gab2	ENSMUSG00000004508	growth factor receptor bound protein 2-associated protein 2 [Source:MGI Symbol;Acc:MGI:1333854]
ENSMUST00000004655	1.28965	-0.561214	1.76174	-0.318557	0.750063	NA	0.977805	1.28369	0.879451	0.974075	2.09273	1.53016	Psg17	ENSMUSG00000004540	pregnancy specific glycoprotein 17 [Source:MGI Symbol;Acc:MGI:1347250]
ENSMUST00000004657	1.07067	-0.375098	2.18399	-0.171749	0.863635	NA	0.977805	0	1.7589	2.92222	0	0.765079	Psg19	ENSMUSG00000004542	pregnancy specific glycoprotein 19 [Source:MGI Symbol;Acc:MGI:1347252]
ENSMUST00000004686	18.0109	-0.488003	0.431734	-1.13033	0.258336	0.527236	15.6449	19.2553	10.5534	11.6889	27.2055	23.7175	Pex11g	ENSMUSG00000069633	peroxisomal biogenesis factor 11 gamma [Source:MGI Symbol;Acc:MGI:1920905]
ENSMUST00000004729	0.738342	-1.68246	2.72487	-0.617446	0.53694	NA	0	0	0.879451	0.974075	1.04637	1.53016	Etfb	ENSMUSG00000004610	electron transferring flavoprotein, beta polypeptide [Source:MGI Symbol;Acc:MGI:106098]
ENSMUST00000004749	0.941176	-2.06575	2.55649	-0.808042	0.419066	NA	0.977805	0	0	0	3.1391	1.53016	Pcp2	ENSMUSG00000004630	Purkinje cell protein 2 (L7) [Source:MGI Symbol;Acc:MGI:97508]
ENSMUST00000004756	2.86866	0.793194	1.06152	0.747222	0.45493	NA	3.91122	2.56738	4.39726	1.94815	2.09273	2.29524	Wwox	ENSMUSG00000004637	WW domain-containing oxidoreductase [Source:MGI Symbol;Acc:MGI:1931237]
ENSMUST00000004774	0.436434	-0.657657	3.84202	-0.171175	0.864086	NA	0	0	0.879451	0.974075	0	0.765079	Aqp1	ENSMUSG00000004655	aquaporin 1 [Source:MGI Symbol;Acc:MGI:103201]
ENSMUST00000004784	1.01243	-1.2161	2.28442	-0.532344	0.594488	NA	0	0	1.7589	0.974075	1.04637	2.29524	Cnn2	ENSMUSG00000004665	calponin 2 [Source:MGI Symbol;Acc:MGI:105093]
ENSMUST00000004868	4.44839	0.985422	0.921366	1.06952	0.284834	NA	7.82244	0	9.67397	1.94815	4.18546	3.06032	Mtfp1	ENSMUSG00000004748	mitochondrial fission process 1 [Source:MGI Symbol;Acc:MGI:1916686]
ENSMUST00000004910	0.289859	-1.61836	4.04523	-0.400066	0.689108	NA	0	0	0	0.974075	0	0.765079	Eif2b2	ENSMUSG00000004788	eukaryotic translation initiation factor 2B, subunit 2 beta [Source:MGI Symbol;Acc:MGI:2145118]
ENSMUST00000004920	45.9261	0.368326	0.2609	1.41175	0.158023	0.398816	50.8459	55.1987	50.1287	41.8852	29.2982	48.2	Ulk2	ENSMUSG00000004798	unc-51 like kinase 2 [Source:MGI Symbol;Acc:MGI:1352758]
ENSMUST00000004949	0.711144	0.805923	2.98595	0.269905	0.787233	NA	0.977805	0	1.7589	0	0	1.53016	Traf6	ENSMUSG00000027164	TNF receptor-associated factor 6 [Source:MGI Symbol;Acc:MGI:108072]
ENSMUST00000004959	0.595058	0.0214935	3.30679	0.00649982	0.994814	NA	0	0	1.7589	0	1.04637	0.765079	Grap	ENSMUSG00000004837	GRB2-related adaptor protein [Source:MGI Symbol;Acc:MGI:1918770]
ENSMUST00000004964	0.274088	0.167149	4.08047	0.0409631	0.967325	NA	0	0	0.879451	0	0	0.765079	Pou1f1	ENSMUSG00000004842	POU domain, class 1, transcription factor 1 [Source:MGI Symbol;Acc:MGI:97588]
ENSMUST00000004965	0.764417	0.491434	3.10966	0.158035	0.87443	NA	0	0	2.63835	1.94815	0	0	Chmp2b	ENSMUSG00000004843	charged multivesicular body protein 2B [Source:MGI Symbol;Acc:MGI:1916192]
ENSMUST00000004968	1.30952	-1.19252	1.955	-0.609984	0.541873	NA	0	2.56738	0	1.94815	1.04637	2.29524	Plod3	ENSMUSG00000004846	procollagen-lysine, 2-oxoglutarate 5-dioxygenase 3 [Source:MGI Symbol;Acc:MGI:1347008]
ENSMUST00000004985	5.06109	1.42297	0.899965	1.58114	0.113846	NA	5.86683	5.13476	11.4329	0	1.04637	6.88572	Brpf3	ENSMUSG00000063952	bromodomain and PHD finger containing, 3 [Source:MGI Symbol;Acc:MGI:2146836]
ENSMUST00000005003	1.57603	-0.507705	1.61547	-0.314277	0.753311	NA	2.93341	0	0.879451	0.974075	3.1391	1.53016	Lbr	ENSMUSG00000004880	lamin B receptor [Source:MGI Symbol;Acc:MGI:2138281]
ENSMUST00000005015	21.401	-0.496636	0.398927	-1.24493	0.213157	0.473938	26.4007	16.688	10.5534	25.3259	18.8346	30.6032	Prcc	ENSMUSG00000004895	papillary renal cell carcinoma (translocation-associated) [Source:MGI Symbol;Acc:MGI:2137738]
ENSMUST00000005017	105.629	0.0897874	0.184008	0.487955	0.625582	0.820791	126.137	116.816	85.3068	94.4853	96.2656	114.762	Hdgf	ENSMUSG00000004897	heparin binding growth factor [Source:MGI Symbol;Acc:MGI:1194494]
ENSMUST00000005019	0.427897	2.30122	4.01629	0.572971	0.566664	NA	0	2.56738	0	0	0	0	Crabp2	ENSMUSG00000004885	cellular retinoic acid binding protein II [Source:MGI Symbol;Acc:MGI:88491]
ENSMUST00000005053	24.2588	-0.15354	0.583559	-0.263109	0.792467	0.909571	9.77805	35.9433	23.7452	19.4815	19.8809	36.7238	Tmem242	ENSMUSG00000004945	transmembrane protein 242 [Source:MGI Symbol;Acc:MGI:1917794]
ENSMUST00000005057	224.585	-0.161759	0.122588	-1.31953	0.186991	0.441544	224.895	202.823	207.551	241.571	239.618	231.054	Thop1	ENSMUSG00000004929	thimet oligopeptidase 1 [Source:MGI Symbol;Acc:MGI:1354165]
ENSMUST00000005064	27.7711	-0.305119	0.330849	-0.922232	0.356408	0.625658	21.5117	26.9575	26.3835	23.3778	32.4373	35.9587	Pias4	ENSMUSG00000004934	protein inhibitor of activated STAT 4 [Source:MGI Symbol;Acc:MGI:2136940]
ENSMUST00000005066	3.13444	0.469336	1.87319	0.250554	0.802159	NA	3.91122	0	7.03561	0.974075	0	6.88572	Map2k1	ENSMUSG00000004936	mitogen-activated protein kinase kinase 1 [Source:MGI Symbol;Acc:MGI:1346866]
ENSMUST00000005069	79.4732	0.0185033	0.195579	0.094608	0.924626	0.965595	81.1578	70.6029	87.0657	76.9519	86.8483	74.2127	Nmrk2	ENSMUSG00000004939	nicotinamide riboside kinase 2 [Source:MGI Symbol;Acc:MGI:1916814]
ENSMUST00000005103	34.004	-0.697512	0.321669	-2.16842	0.0301268	0.136294	16.6227	37.227	24.6246	48.7037	43.9473	32.8984	Nfe2l3	ENSMUSG00000029832	nuclear factor, erythroid derived 2, like 3 [Source:MGI Symbol;Acc:MGI:1339958]
ENSMUST00000005108	9.24498	-0.213916	0.60011	-0.356461	0.721495	0.875289	8.80024	10.2695	7.03561	11.6889	3.1391	14.5365	Kdm5a	ENSMUSG00000030180	lysine (K)-specific demethylase 5A [Source:MGI Symbol;Acc:MGI:2136980]
ENSMUST00000005173	0.29315	1.84622	4.0531	0.45551	0.648743	NA	0	0	1.7589	0	0	0	Sgsh	ENSMUSG00000005043	N-sulfoglucosamine sulfohydrolase (sulfamidase) [Source:MGI Symbol;Acc:MGI:1350341]
ENSMUST00000005185	0.427897	2.30122	4.01629	0.572971	0.566664	NA	0	2.56738	0	0	0	0	Cstb	ENSMUSG00000005054	cystatin B [Source:MGI Symbol;Acc:MGI:109514]
ENSMUST00000005234	0.838036	-0.843716	2.71931	-0.310269	0.756357	NA	0	0	1.7589	0.974075	0	2.29524	Wdr1	ENSMUSG00000005103	WD repeat domain 1 [Source:MGI Symbol;Acc:MGI:1337100]
ENSMUST00000005255	1.41244	-1.74186	1.80483	-0.965111	0.334489	NA	0.977805	0	0.879451	1.94815	3.1391	1.53016	Ccn4	ENSMUSG00000005124	cellular communication network factor 4 [Source:MGI Symbol;Acc:MGI:1197008]
ENSMUST00000005256	0.761748	-0.504627	2.6922	-0.18744	0.851316	NA	0.977805	0	0.879451	1.94815	0	0.765079	Ndrg1	ENSMUSG00000005125	N-myc downstream regulated gene 1 [Source:MGI Symbol;Acc:MGI:1341799]
ENSMUST00000005262	3.09242	-0.354377	1.03748	-0.341576	0.73267	NA	1.95561	2.56738	3.51781	5.84445	3.1391	1.53016	4930550C14Rik	ENSMUSG00000005131	RIKEN cDNA 4930550C14 gene [Source:MGI Symbol;Acc:MGI:1922561]
ENSMUST00000005279	0.820677	-0.644458	2.59768	-0.248089	0.804065	NA	0.977805	0	0.879451	0.974075	2.09273	0	Klf5	ENSMUSG00000005148	Kruppel-like factor 5 [Source:MGI Symbol;Acc:MGI:1338056]
ENSMUST00000005334	0.714277	1.69927	2.99972	0.566475	0.571071	NA	1.95561	1.28369	0	0	1.04637	0	Shbg	ENSMUSG00000005202	sex hormone binding globulin [Source:MGI Symbol;Acc:MGI:98295]
ENSMUST00000005336	0.661432	-2.78898	3.33351	-0.836648	0.40279	NA	0	0	0	2.92222	1.04637	0	Senp3	ENSMUSG00000005204	SUMO/sentrin specific peptidase 3 [Source:MGI Symbol;Acc:MGI:2158736]
ENSMUST00000005352	1.13041	-2.30696	2.17343	-1.06144	0.288489	NA	0	1.28369	0	2.92222	1.04637	1.53016	Corin	ENSMUSG00000005220	corin, serine peptidase [Source:MGI Symbol;Acc:MGI:1349451]
ENSMUST00000005399	0.324692	-1.763	4.03225	-0.437225	0.661948	NA	0	0	0	1.94815	0	0	Zfp287	ENSMUSG00000005267	zinc finger protein 287 [Source:MGI Symbol;Acc:MGI:2176561]
ENSMUST00000005431	4.24398	0.0798373	0.872833	0.0914692	0.92712	NA	4.88902	3.85107	4.39726	0.974075	5.23183	6.12064	Letm1	ENSMUSG00000005299	leucine zipper-EF-hand containing transmembrane protein 1 [Source:MGI Symbol;Acc:MGI:1932557]
ENSMUST00000005452	2.25261	-2.49852	1.52516	-1.63821	0.101379	NA	1.95561	0	0	5.84445	4.18546	1.53016	Fgfr4	ENSMUSG00000005320	fibroblast growth factor receptor 4 [Source:MGI Symbol;Acc:MGI:95525]
ENSMUST00000005490	0.99399	-1.11717	2.32997	-0.47948	0.631597	NA	0.977805	0	0.879451	0	1.04637	3.06032	Slc1a6	ENSMUSG00000005357	solute carrier family 1 (high affinity aspartate/glutamate transporter), member 6 [Source:MGI Symbol;Acc:MGI:1096331]
ENSMUST00000005503	23.729	-0.204591	0.357322	-0.572567	0.566938	0.785595	24.4451	15.4043	25.5041	26.3	29.2982	21.4222	Msh6	ENSMUSG00000005370	mutS homolog 6 [Source:MGI Symbol;Acc:MGI:1343961]
ENSMUST00000005507	1.21784	0.796563	2.04427	0.389656	0.696791	NA	0	3.85107	0.879451	0	1.04637	1.53016	Mlxipl	ENSMUSG00000005373	MLX interacting protein-like [Source:MGI Symbol;Acc:MGI:1927999]
ENSMUST00000005532	2.29285	0.239746	1.26914	0.188905	0.850167	NA	1.95561	3.85107	1.7589	3.8963	0	2.29524	Nid1	ENSMUSG00000005397	nidogen 1 [Source:MGI Symbol;Acc:MGI:97342]
ENSMUST00000005548	1.56222	1.21956	1.60617	0.759298	0.447674	NA	0.977805	3.85107	1.7589	0.974075	1.04637	0.765079	Hmox1	ENSMUSG00000005413	heme oxygenase 1 [Source:MGI Symbol;Acc:MGI:96163]
ENSMUST00000005600	5.08886	-0.275102	0.849675	-0.323773	0.74611	NA	2.93341	6.41845	4.39726	9.74075	6.27819	0.765079	Rfx1	ENSMUSG00000031706	regulatory factor X, 1 (influences HLA class II expression) [Source:MGI Symbol;Acc:MGI:105982]
ENSMUST00000005606	15.5073	-0.783109	0.461472	-1.69698	0.0897003	0.282826	9.77805	15.4043	9.67397	21.4296	11.51	25.2476	Prkaca	ENSMUSG00000005469	protein kinase, cAMP dependent, catalytic, alpha [Source:MGI Symbol;Acc:MGI:97592]
ENSMUST00000005607	10.5005	-0.177377	0.533737	-0.332331	0.73964	0.886404	7.82244	14.1206	7.91506	11.6889	11.51	9.94603	Asf1b	ENSMUSG00000005470	anti-silencing function 1B histone chaperone [Source:MGI Symbol;Acc:MGI:1914179]
ENSMUST00000005616	12.0789	-0.298592	0.529236	-0.564194	0.572622	0.788568	10.7559	7.70214	14.0712	15.5852	5.23183	19.127	Pkn1	ENSMUSG00000057672	protein kinase N1 [Source:MGI Symbol;Acc:MGI:108022]
ENSMUST00000005620	24.6636	0.591302	0.368543	1.60443	0.108619	0.317738	17.6005	30.8086	40.4548	17.5333	20.9273	20.6571	Dnajb1	ENSMUSG00000005483	DnaJ heat shock protein family (Hsp40) member B1 [Source:MGI Symbol;Acc:MGI:1931874]
ENSMUST00000005647	3.68574	-0.811094	0.950727	-0.853131	0.393587	NA	3.91122	1.28369	2.63835	3.8963	7.32456	3.06032	Ndufs3	ENSMUSG00000005510	NADH:ubiquinone oxidoreductase core subunit S3 [Source:MGI Symbol;Acc:MGI:1915599]
ENSMUST00000005671	9.31469	-0.036845	0.61652	-0.0597629	0.952344	0.978797	17.6005	2.56738	7.03561	12.663	8.37092	7.65079	Igf1r	ENSMUSG00000005533	insulin-like growth factor I receptor [Source:MGI Symbol;Acc:MGI:96433]
ENSMUST00000005678	0.439726	2.40092	4.00909	0.598869	0.54926	NA	0	0	2.63835	0	0	0	Fcer2a	ENSMUSG00000005540	Fc receptor, IgE, low affinity II, alpha polypeptide [Source:MGI Symbol;Acc:MGI:95497]
ENSMUST00000005705	29.1519	0.0662597	0.343126	0.193106	0.846876	0.932237	20.5339	26.9575	41.3342	22.4037	37.6691	26.0127	Trim28	ENSMUSG00000005566	tripartite motif-containing 28 [Source:MGI Symbol;Acc:MGI:109274]
ENSMUST00000005711	0.539262	1.16868	3.48114	0.335718	0.737084	NA	0.977805	1.28369	0	0.974075	0	0	Chmp2a	ENSMUSG00000033916	charged multivesicular body protein 2A [Source:MGI Symbol;Acc:MGI:1916203]
ENSMUST00000005714	5.85488	1.24109	0.798674	1.55394	0.120199	NA	2.93341	11.5532	10.5534	2.92222	1.04637	6.12064	Ube2m	ENSMUSG00000005575	ubiquitin-conjugating enzyme E2M [Source:MGI Symbol;Acc:MGI:108278]
ENSMUST00000005749	9.68998	-0.898152	0.596763	-1.50504	0.132314	0.358496	9.77805	1.28369	8.79451	14.6111	8.37092	15.3016	Ctr9	ENSMUSG00000005609	CTR9 homolog, Paf1/RNA polymerase II complex component [Source:MGI Symbol;Acc:MGI:109345]
ENSMUST00000005798	0.976318	1.2138	2.21939	0.546907	0.584443	NA	1.95561	1.28369	0.879451	0.974075	0	0.765079	Snx6	ENSMUSG00000005656	sorting nexin 6 [Source:MGI Symbol;Acc:MGI:1919433]
ENSMUST00000005810	2.52639	1.5436	1.34374	1.14873	0.250666	NA	4.88902	0	6.15616	0.974075	3.1391	0	Mthfd2	ENSMUSG00000005667	methylenetetrahydrofolate dehydrogenase (NAD+ dependent), methenyltetrahydrofolate cyclohydrolase [Source:MGI Symbol;Acc:MGI:1338850]
ENSMUST00000005826	61.5871	0.165707	0.231109	0.717008	0.473369	0.720805	76.2688	57.766	60.6822	46.7556	72.1992	55.8508	Cs	ENSMUSG00000005683	citrate synthase [Source:MGI Symbol;Acc:MGI:88529]
ENSMUST00000005829	2.87558	-0.615132	1.1752	-0.523427	0.600677	NA	5.86683	0	0.879451	4.87037	1.04637	4.59048	Ampd3	ENSMUSG00000005686	adenosine monophosphate deaminase 3 [Source:MGI Symbol;Acc:MGI:1096344]
ENSMUST00000005841	5.23081	-0.651893	0.807005	-0.807794	0.419209	NA	5.86683	2.56738	3.51781	8.76667	8.37092	2.29524	Ctcf	ENSMUSG00000005698	CCCTC-binding factor [Source:MGI Symbol;Acc:MGI:109447]
ENSMUST00000005849	0.360524	2.07797	4.03428	0.515078	0.606498	NA	0	1.28369	0.879451	0	0	0	Agrp	ENSMUSG00000005705	agouti related neuropeptide [Source:MGI Symbol;Acc:MGI:892013]
ENSMUST00000005862	0.376294	0.167149	4.08047	0.0409631	0.967325	NA	0	1.28369	0	0.974075	0	0	Tfap4	ENSMUSG00000005718	transcription factor AP4 [Source:MGI Symbol;Acc:MGI:103239]
ENSMUST00000005923	2.69951	-0.19853	1.15321	-0.172154	0.863317	NA	3.91122	0	3.51781	3.8963	1.04637	3.8254	Psmb4	ENSMUSG00000005779	proteasome (prosome, macropain) subunit, beta type 4 [Source:MGI Symbol;Acc:MGI:1098257]
ENSMUST00000005933	15.1094	-0.746809	0.495559	-1.507	0.13181	0.358086	6.84463	21.8227	6.15616	24.3519	14.6491	16.8317	Klk1b16	ENSMUSG00000038968	kallikrein 1-related peptidase b16 [Source:MGI Symbol;Acc:MGI:891982]
ENSMUST00000005952	4.02211	-1.1449	0.954091	-1.19999	0.230143	NA	0	5.13476	2.63835	6.81852	4.18546	5.35556	Slc30a4	ENSMUSG00000005802	solute carrier family 30 (zinc transporter), member 4 [Source:MGI Symbol;Acc:MGI:1345282]
ENSMUST00000005954	0.324692	-1.763	4.03225	-0.437225	0.661948	NA	0	0	0	1.94815	0	0	Bloc1s6	ENSMUSG00000005804	biogenesis of lysosomal organelles complex-1, subunit 6, pallidin [Source:MGI Symbol;Acc:MGI:1927580]
ENSMUST00000005976	2.83467	0.961536	1.13016	0.8508	0.39488	NA	1.95561	3.85107	5.27671	0.974075	4.18546	0.765079	Tnfsf14	ENSMUSG00000005824	tumor necrosis factor (ligand) superfamily, member 14 [Source:MGI Symbol;Acc:MGI:1355317]
ENSMUST00000006027	0.939474	-3.32344	2.72705	-1.21869	0.222961	NA	0	0	0	0	1.04637	4.59048	Reep5	ENSMUSG00000005873	receptor accessory protein 5 [Source:MGI Symbol;Acc:MGI:1270152]
ENSMUST00000006046	3.08765	0.633944	1.06374	0.595958	0.551203	NA	3.91122	3.85107	3.51781	0	4.18546	3.06032	Trh	ENSMUSG00000005892	thyrotropin releasing hormone [Source:MGI Symbol;Acc:MGI:98823]
ENSMUST00000006101	139.567	0.242564	0.270918	0.895342	0.370604	0.638852	136.893	204.107	114.329	127.604	109.868	144.6	Itgae	ENSMUSG00000005947	integrin alpha E, epithelial-associated [Source:MGI Symbol;Acc:MGI:1298377]
ENSMUST00000006104	2.52642	-0.0671326	1.18698	-0.0565573	0.954898	NA	3.91122	2.56738	0.879451	3.8963	3.1391	0.765079	P2rx5	ENSMUSG00000005950	purinergic receptor P2X, ligand-gated ion channel, 5 [Source:MGI Symbol;Acc:MGI:2137026]
ENSMUST00000006112	0.274088	0.167149	4.08047	0.0409631	0.967325	NA	0	0	0.879451	0	0	0.765079	Ephb3	ENSMUSG00000005958	Eph receptor B3 [Source:MGI Symbol;Acc:MGI:104770]
ENSMUST00000006137	28.547	-0.467257	0.325143	-1.43708	0.150695	0.386869	18.5783	26.9575	26.3835	36.0408	33.4837	29.8381	Trap1	ENSMUSG00000005981	TNF receptor-associated protein 1 [Source:MGI Symbol;Acc:MGI:1915265]
ENSMUST00000006139	167.07	0.504739	0.162847	3.09947	0.00193868	0.0160648	193.605	181	211.068	171.437	141.259	104.051	1700037C18Rik	ENSMUSG00000005983	RIKEN cDNA 1700037C18 gene [Source:MGI Symbol;Acc:MGI:1920511]
ENSMUST00000006181	20.8496	-0.0565714	0.429681	-0.131659	0.895254	0.955449	15.6449	24.3901	21.9863	8.76667	19.8809	34.4286	Napa	ENSMUSG00000006024	N-ethylmaleimide sensitive fusion protein attachment protein alpha [Source:MGI Symbol;Acc:MGI:104563]
ENSMUST00000006235	24.1491	0.00690152	0.394169	0.017509	0.986031	0.994455	19.5561	35.9433	18.4685	18.5074	15.6955	36.7238	Ctsb	ENSMUSG00000021939	cathepsin B [Source:MGI Symbol;Acc:MGI:88561]
ENSMUST00000006254	15.2415	0.117345	0.450519	0.260466	0.794504	0.91012	22.4895	8.98583	15.8301	12.663	14.6491	16.8317	Tbcb	ENSMUSG00000006095	tubulin folding cofactor B [Source:MGI Symbol;Acc:MGI:1913661]
ENSMUST00000006286	0.994449	-2.17413	2.48879	-0.873571	0.382352	NA	0	0	0.879451	1.94815	3.1391	0	Inpp5k	ENSMUSG00000006127	inositol polyphosphate 5-phosphatase K [Source:MGI Symbol;Acc:MGI:1194899]
ENSMUST00000006293	9.00249	-0.762866	0.587754	-1.29793	0.19431	0.450624	8.80024	3.85107	7.03561	13.637	11.51	9.18095	Crkl	ENSMUSG00000006134	v-crk avian sarcoma virus CT10 oncogene homolog-like [Source:MGI Symbol;Acc:MGI:104686]
ENSMUST00000006301	21.29	-0.33097	0.411704	-0.803902	0.421454	0.678655	9.77805	25.6738	21.1068	26.3	30.3446	14.5365	Lrwd1	ENSMUSG00000029703	leucine-rich repeats and WD repeat domain containing 1 [Source:MGI Symbol;Acc:MGI:1918985]
ENSMUST00000006311	0.436434	-0.657657	3.84202	-0.171175	0.864086	NA	0	0	0.879451	0.974075	0	0.765079	Tead4	ENSMUSG00000030353	TEA domain family member 4 [Source:MGI Symbol;Acc:MGI:106907]
ENSMUST00000006353	7.67767	0.257028	0.623599	0.412169	0.680215	NA	8.80024	6.41845	9.67397	4.87037	9.41729	6.88572	Cdkal1	ENSMUSG00000006191	CDK5 regulatory subunit associated protein 1-like 1 [Source:MGI Symbol;Acc:MGI:1921765]
ENSMUST00000006377	2.09834	0.918146	1.35428	0.67796	0.497797	NA	0.977805	3.85107	3.51781	1.94815	0	2.29524	Zbtb17	ENSMUSG00000006215	zinc finger and BTB domain containing 17 [Source:MGI Symbol;Acc:MGI:107410]
ENSMUST00000006380	6.61771	0.0653391	0.679095	0.0962149	0.92335	NA	8.80024	6.41845	5.27671	5.84445	4.18546	9.18095	Fam131c	ENSMUSG00000006218	family with sequence similarity 131, member C [Source:MGI Symbol;Acc:MGI:2685539]
ENSMUST00000006397	1.51024	-0.237154	1.69657	-0.139785	0.88883	NA	1.95561	1.28369	0.879451	3.8963	1.04637	0	Epor	ENSMUSG00000006235	erythropoietin receptor [Source:MGI Symbol;Acc:MGI:95408]
ENSMUST00000006403	34.752	0.0568147	0.296951	0.191327	0.84827	0.932964	34.2232	42.3618	29.9014	32.1445	40.8082	29.073	Ccdc159	ENSMUSG00000006241	coiled-coil domain containing 159 [Source:MGI Symbol;Acc:MGI:1914369]
ENSMUST00000006415	2.98903	-0.0631505	1.10534	-0.0571322	0.95444	NA	6.84463	0	1.7589	3.8963	3.1391	2.29524	Plcb2	ENSMUSG00000040061	phospholipase C, beta 2 [Source:MGI Symbol;Acc:MGI:107465]
ENSMUST00000006431	6.3218	1.00915	0.709584	1.42217	0.154977	NA	9.77805	7.70214	7.91506	1.94815	5.23183	5.35556	Atp6v1b1	ENSMUSG00000006269	ATPase, H+ transporting, lysosomal V1 subunit B1 [Source:MGI Symbol;Acc:MGI:103285]
ENSMUST00000006435	12.0153	-0.154449	0.530488	-0.291146	0.77094	0.899332	13.6893	16.688	4.39726	9.74075	11.51	16.0667	Atp6v1b2	ENSMUSG00000006273	ATPase, H+ transporting, lysosomal V1 subunit B2 [Source:MGI Symbol;Acc:MGI:109618]
ENSMUST00000006444	8.72885	0.386788	0.593764	0.651418	0.514777	NA	9.77805	6.41845	13.1918	4.87037	10.4637	7.65079	Tep1	ENSMUSG00000006281	telomerase associated protein 1 [Source:MGI Symbol;Acc:MGI:109573]
ENSMUST00000006462	4.22239	-0.121697	0.874651	-0.139138	0.889341	NA	1.95561	3.85107	6.15616	5.84445	5.23183	2.29524	Aamp	ENSMUSG00000006299	angio-associated migratory protein [Source:MGI Symbol;Acc:MGI:107809]
ENSMUST00000006476	0.662431	0.232042	2.9217	0.0794202	0.936698	NA	0	1.28369	0.879451	0	1.04637	0.765079	Upk1a	ENSMUSG00000006313	uroplakin 1A [Source:MGI Symbol;Acc:MGI:98911]
ENSMUST00000006544	0.729804	0.43587	2.98398	0.14607	0.883866	NA	0	2.56738	0	0	1.04637	0.765079	Gcat	ENSMUSG00000006378	glycine C-acetyltransferase (2-amino-3-ketobutyrate-coenzyme A ligase) [Source:MGI Symbol;Acc:MGI:1349389]
ENSMUST00000006557	19.9211	-0.20065	0.384204	-0.522249	0.601497	0.806205	15.6449	20.539	19.3479	23.3778	23.02	17.5968	Elovl1	ENSMUSG00000006390	elongation of very long chain fatty acids (FEN1/Elo2, SUR4/Elo3, yeast)-like 1 [Source:MGI Symbol;Acc:MGI:1858959]
ENSMUST00000006565	27.2402	-0.475215	0.386408	-1.22983	0.218762	0.48151	19.5561	14.1206	33.4192	27.2741	49.1792	19.8921	Cdc20	ENSMUSG00000006398	cell division cycle 20 [Source:MGI Symbol;Acc:MGI:1859866]
ENSMUST00000006578	1.44262	-0.239733	1.72363	-0.139086	0.889382	NA	0	1.28369	2.63835	2.92222	1.04637	0.765079	Nectin4	ENSMUSG00000006411	nectin cell adhesion molecule 4 [Source:MGI Symbol;Acc:MGI:1918990]
ENSMUST00000006587	0.920371	0.033423	2.25563	0.0148176	0.988178	NA	0.977805	0	1.7589	0.974075	1.04637	0.765079	Tmem189	ENSMUSG00000090213	transmembrane protein 189 [Source:MGI Symbol;Acc:MGI:2142624]
ENSMUST00000006611	1.1577	1.44088	2.31918	0.621288	0.53441	NA	0	5.13476	0	0	1.04637	0.765079	Srm	ENSMUSG00000006442	spermidine synthase [Source:MGI Symbol;Acc:MGI:102690]
ENSMUST00000006614	5.67459	-1.75803	0.866586	-2.02869	0.0424901	NA	0	1.28369	6.15616	4.87037	12.5564	9.18095	Epha2	ENSMUSG00000006445	Eph receptor A2 [Source:MGI Symbol;Acc:MGI:95278]
ENSMUST00000006625	0.82509	-3.10592	2.94926	-1.05312	0.292287	NA	0	0	0	0	4.18546	0.765079	Rbm14	ENSMUSG00000006456	RNA binding motif protein 14 [Source:MGI Symbol;Acc:MGI:1929092]
ENSMUST00000006626	2.70094	-0.42961	1.18187	-0.363501	0.716231	NA	3.91122	1.28369	1.7589	3.8963	0	5.35556	Actn3	ENSMUSG00000006457	actinin alpha 3 [Source:MGI Symbol;Acc:MGI:99678]
ENSMUST00000006638	23.872	-0.326301	0.352305	-0.92619	0.354347	0.623445	24.4451	21.8227	17.589	23.3778	26.1591	29.8381	Slc34a3	ENSMUSG00000006469	solute carrier family 34 (sodium phosphate), member 3 [Source:MGI Symbol;Acc:MGI:2159410]
ENSMUST00000006687	4.59898	-0.974205	0.920897	-1.05789	0.290107	NA	4.88902	2.56738	1.7589	12.663	4.18546	1.53016	Orm3	ENSMUSG00000028359	orosomucoid 3 [Source:MGI Symbol;Acc:MGI:97445]
ENSMUST00000006716	1.63028	-0.46121	1.70379	-0.270697	0.786624	NA	2.93341	1.28369	0	0.974075	0	4.59048	Wnt6	ENSMUSG00000033227	wingless-type MMTV integration site family, member 6 [Source:MGI Symbol;Acc:MGI:98960]
ENSMUST00000006718	0.33674	-1.80881	4.02839	-0.449015	0.65342	NA	0	0	0	0.974075	1.04637	0	Wnt10a	ENSMUSG00000026167	wingless-type MMTV integration site family, member 10A [Source:MGI Symbol;Acc:MGI:108071]
ENSMUST00000006742	5.78343	-0.405661	0.827543	-0.4902	0.623992	NA	1.95561	11.5532	1.7589	8.76667	8.37092	2.29524	Atp7b	ENSMUSG00000006567	ATPase, Cu++ transporting, beta polypeptide [Source:MGI Symbol;Acc:MGI:103297]
ENSMUST00000006749	33.8638	-0.702943	0.311504	-2.25661	0.0240326	0.116119	15.6449	32.0922	29.9014	42.8593	42.901	39.7841	Slc4a1	ENSMUSG00000006574	solute carrier family 4 (anion exchanger), member 1 [Source:MGI Symbol;Acc:MGI:109393]
ENSMUST00000006762	1.46898	-1.84477	1.87188	-0.985517	0.32437	NA	0.977805	0	0.879451	3.8963	0	3.06032	Snai3	ENSMUSG00000006587	snail family zinc finger 3 [Source:MGI Symbol;Acc:MGI:1353563]
ENSMUST00000006774	10.8817	-0.686134	0.604291	-1.13544	0.256193	0.525088	7.82244	11.5532	6.15616	2.92222	14.6491	22.1873	Gtf2h1	ENSMUSG00000006599	general transcription factor II H, polypeptide 1 [Source:MGI Symbol;Acc:MGI:1277216]
ENSMUST00000006818	1.75049	1.04446	1.50243	0.695178	0.486944	NA	1.95561	2.56738	2.63835	0	1.04637	2.29524	Tcf23	ENSMUSG00000006642	transcription factor 23 [Source:MGI Symbol;Acc:MGI:1934960]
ENSMUST00000006853	2.29538	0.0615411	1.23472	0.049842	0.960248	NA	1.95561	2.56738	2.63835	0.974075	1.04637	4.59048	P4htm	ENSMUSG00000006675	prolyl 4-hydroxylase, transmembrane (endoplasmic reticulum) [Source:MGI Symbol;Acc:MGI:1921693]
ENSMUST00000006856	3.19285	2.10018	1.14944	1.82713	0.06768	NA	5.86683	2.56738	7.03561	2.92222	0	0.765079	Pola1	ENSMUSG00000006678	polymerase (DNA directed), alpha 1 [Source:MGI Symbol;Acc:MGI:99660]
ENSMUST00000006900	5.05087	-0.392701	0.851841	-0.461003	0.644796	NA	7.82244	2.56738	2.63835	0.974075	9.41729	6.88572	Acot13	ENSMUSG00000006717	acyl-CoA thioesterase 13 [Source:MGI Symbol;Acc:MGI:1914084]
ENSMUST00000006911	11.6924	0.576128	0.508026	1.13405	0.256773	0.525088	11.7337	15.4043	14.9507	5.84445	11.51	10.7111	Cdk4	ENSMUSG00000006728	cyclin-dependent kinase 4 [Source:MGI Symbol;Acc:MGI:88357]
ENSMUST00000006912	0.550688	-0.840742	3.4462	-0.243962	0.80726	NA	0	1.28369	0	0.974075	1.04637	0	Pip4k2a	ENSMUSG00000026737	phosphatidylinositol-5-phosphate 4-kinase, type II, alpha [Source:MGI Symbol;Acc:MGI:1298206]
ENSMUST00000006915	0.348788	-1.85356	4.02474	-0.460542	0.645127	NA	0	0	0	0	2.09273	0	Mettl1	ENSMUSG00000006732	methyltransferase like 1 [Source:MGI Symbol;Acc:MGI:1339986]
ENSMUST00000006949	4.71666	0.655543	0.848828	0.772292	0.439941	NA	7.82244	1.28369	7.91506	5.84445	3.1391	2.29524	Tph2	ENSMUSG00000006764	tryptophan hydroxylase 2 [Source:MGI Symbol;Acc:MGI:2651811]
ENSMUST00000006952	0.770882	-1.6072	2.86729	-0.56053	0.575118	NA	0	1.28369	0	0	1.04637	2.29524	Saa4	ENSMUSG00000040017	serum amyloid A 4 [Source:MGI Symbol;Acc:MGI:98224]
ENSMUST00000006963	3.07296	-1.01423	1.06605	-0.951389	0.341407	NA	0.977805	2.56738	2.63835	1.94815	4.18546	6.12064	Krt28	ENSMUSG00000055937	keratin 28 [Source:MGI Symbol;Acc:MGI:1918093]
ENSMUST00000006969	1.414	2.06416	1.90094	1.08586	0.27754	NA	3.91122	1.28369	1.7589	0	0	1.53016	Krt23	ENSMUSG00000006777	keratin 23 [Source:MGI Symbol;Acc:MGI:2148866]
ENSMUST00000006991	2.50709	1.20556	1.24935	0.964946	0.334572	NA	2.93341	1.28369	6.15616	0	3.1391	1.53016	Hcn1	ENSMUSG00000021730	hyperpolarization activated cyclic nucleotide gated potassium channel 1 [Source:MGI Symbol;Acc:MGI:1096392]
ENSMUST00000007012	2.49187	1.20656	1.30803	0.922429	0.356305	NA	2.93341	7.70214	0	0.974075	1.04637	2.29524	Sod2	ENSMUSG00000006818	superoxide dismutase 2, mitochondrial [Source:MGI Symbol;Acc:MGI:98352]
ENSMUST00000007046	1.98472	-1.11165	1.50502	-0.738629	0.460132	NA	0.977805	0	2.63835	0	5.23183	3.06032	Tmco6	ENSMUSG00000006850	transmembrane and coiled-coil domains 6 [Source:MGI Symbol;Acc:MGI:1919233]
ENSMUST00000007130	0.274088	0.167149	4.08047	0.0409631	0.967325	NA	0	0	0.879451	0	0	0.765079	Ctnnb1	ENSMUSG00000006932	catenin (cadherin associated protein), beta 1 [Source:MGI Symbol;Acc:MGI:88276]
ENSMUST00000007139	21.1989	-0.0656012	0.391583	-0.167528	0.866954	0.941681	25.4229	20.539	15.8301	23.3778	28.2519	13.7714	Eif1b	ENSMUSG00000006941	eukaryotic translation initiation factor 1B [Source:MGI Symbol;Acc:MGI:1916219]
ENSMUST00000007156	2.13936	-1.21884	1.3264	-0.918913	0.358141	NA	1.95561	0	1.7589	2.92222	3.1391	3.06032	Klk1b11	ENSMUSG00000044485	kallikrein 1-related peptidase b11 [Source:MGI Symbol;Acc:MGI:892023]
ENSMUST00000007207	5.49607	-1.04109	0.796633	-1.30686	0.191261	NA	2.93341	2.56738	5.27671	6.81852	3.1391	12.2413	Clcn2	ENSMUSG00000022843	chloride channel, voltage-sensitive 2 [Source:MGI Symbol;Acc:MGI:105061]
ENSMUST00000007216	7.17729	-1.08221	0.671324	-1.61205	0.10695	NA	4.88902	2.56738	6.15616	7.7926	9.41729	12.2413	Ap2m1	ENSMUSG00000022841	adaptor-related protein complex 2, mu 1 subunit [Source:MGI Symbol;Acc:MGI:1298405]
ENSMUST00000007245	2.15752	0.795543	1.26853	0.627136	0.53057	NA	2.93341	2.56738	2.63835	1.94815	2.09273	0.765079	Vwa7	ENSMUSG00000007030	von Willebrand factor A domain containing 7 [Source:MGI Symbol;Acc:MGI:1306798]
ENSMUST00000007248	4365.05	0.5769	0.0628677	9.17641	4.45686e-20	2.62393e-18	5117.83	5542.97	5024.31	3490.11	3335.81	3679.27	Hspa1l	ENSMUSG00000007033	heat shock protein 1-like [Source:MGI Symbol;Acc:MGI:96231]
ENSMUST00000007255	0.255026	-1.46206	4.06074	-0.360047	0.718812	NA	0	0	0	0	0	1.53016	Ddah2	ENSMUSG00000007039	dimethylarginine dimethylaminohydrolase 2 [Source:MGI Symbol;Acc:MGI:1859016]
ENSMUST00000007257	2.47455	-0.507327	1.34076	-0.378388	0.705143	NA	0	6.41845	0	1.94815	4.18546	2.29524	Clic1	ENSMUSG00000007041	chloride intracellular channel 1 [Source:MGI Symbol;Acc:MGI:2148924]
ENSMUST00000007296	10.7882	0.467622	0.53088	0.880844	0.378402	0.643842	9.77805	15.4043	12.3123	7.7926	12.5564	6.88572	Pole	ENSMUSG00000007080	polymerase (DNA directed), epsilon [Source:MGI Symbol;Acc:MGI:1196391]
ENSMUST00000007317	0.467545	0.884442	4.0531	0.218214	0.827262	NA	0	0	1.7589	0	1.04637	0	Krt19	ENSMUSG00000020911	keratin 19 [Source:MGI Symbol;Acc:MGI:96693]
ENSMUST00000007340	10.606	-0.101759	0.580127	-0.175409	0.860758	0.938724	9.77805	8.98583	11.4329	13.637	16.7418	3.06032	Atp12a	ENSMUSG00000022229	ATPase, H+/K+ transporting, nongastric, alpha polypeptide [Source:MGI Symbol;Acc:MGI:1926943]
ENSMUST00000007449	66.7565	0.139366	0.224887	0.619716	0.535444	0.762929	74.3132	56.4824	77.3917	66.2371	76.3846	49.7302	Akr1b7	ENSMUSG00000052131	aldo-keto reductase family 1, member B7 [Source:MGI Symbol;Acc:MGI:101918]
ENSMUST00000007482	15.0165	-0.544403	0.458908	-1.1863	0.235503	0.501348	7.82244	12.8369	15.8301	23.3778	15.6955	14.5365	Mrpl49	ENSMUSG00000007338	mitochondrial ribosomal protein L49 [Source:MGI Symbol;Acc:MGI:108180]
ENSMUST00000007559	17.3152	0.512843	0.462713	1.10834	0.267715	0.537592	27.3785	25.6738	8.79451	11.6889	10.4637	19.8921	Gatad1	ENSMUSG00000007415	GATA zinc finger domain containing 1 [Source:MGI Symbol;Acc:MGI:1914460]
ENSMUST00000007584	7.70611	-0.551795	0.625642	-0.881966	0.377795	NA	6.84463	7.70214	4.39726	9.74075	8.37092	9.18095	Pcdhac1	ENSMUSG00000103255	protocadherin alpha subfamily C, 1 [Source:MGI Symbol;Acc:MGI:1891442]
ENSMUST00000007601	10.2077	-0.618776	0.558385	-1.10815	0.267795	0.537592	12.7115	5.13476	6.15616	15.5852	9.41729	12.2413	2310003L06Rik	ENSMUSG00000007457	RIKEN cDNA 2310003L06 gene [Source:MGI Symbol;Acc:MGI:1921498]
ENSMUST00000007708	0.614551	-2.69229	3.46367	-0.777295	0.436985	NA	0	0	0	2.92222	0	0.765079	Ppp2r1a	ENSMUSG00000007564	protein phosphatase 2, regulatory subunit A, alpha [Source:MGI Symbol;Acc:MGI:1926334]
ENSMUST00000007738	14.9408	0.383793	0.445095	0.862272	0.388538	0.651545	19.5561	17.9717	13.1918	14.6111	13.6027	10.7111	Hapln4	ENSMUSG00000007594	hyaluronan and proteoglycan link protein 4 [Source:MGI Symbol;Acc:MGI:2679531]
ENSMUST00000007757	8.85998	0.479748	0.604995	0.792979	0.42779	NA	12.7115	14.1206	4.39726	8.76667	6.27819	6.88572	Tgfbr1	ENSMUSG00000007613	transforming growth factor, beta receptor I [Source:MGI Symbol;Acc:MGI:98728]
ENSMUST00000007790	4.301	0.273316	0.902744	0.302762	0.762071	NA	2.93341	3.85107	7.03561	3.8963	7.32456	0.765079	Rad51c	ENSMUSG00000007646	RAD51 paralog C [Source:MGI Symbol;Acc:MGI:2150020]
ENSMUST00000007803	0.348788	-1.85356	4.02474	-0.460542	0.645127	NA	0	0	0	0	2.09273	0	Bcl2l1	ENSMUSG00000007659	BCL2-like 1 [Source:MGI Symbol;Acc:MGI:88139]
ENSMUST00000007814	14.1365	-0.518788	0.460701	-1.12608	0.26013	0.529326	10.7559	8.98583	14.9507	15.5852	14.6491	19.8921	Khsrp	ENSMUSG00000007670	KH-type splicing regulatory protein [Source:MGI Symbol;Acc:MGI:1336214]
ENSMUST00000007865	69.6043	0.233073	0.237566	0.981088	0.326549	0.595989	68.4463	71.8866	86.1862	44.8074	57.5501	88.7492	Ccdc124	ENSMUSG00000007721	coiled-coil domain containing 124 [Source:MGI Symbol;Acc:MGI:1916403]
ENSMUST00000007959	12.2425	0.0923831	0.500264	0.184669	0.853489	0.93518	16.6227	7.70214	13.1918	8.76667	15.6955	11.4762	Rhoa	ENSMUSG00000007815	ras homolog family member A [Source:MGI Symbol;Acc:MGI:1096342]
ENSMUST00000007980	42.7466	0.868319	0.297398	2.91972	0.00350344	0.0258369	33.2454	64.1845	68.5972	24.3519	32.4373	33.6635	Hnrnpa0	ENSMUSG00000007836	heterogeneous nuclear ribonucleoprotein A0 [Source:MGI Symbol;Acc:MGI:1924384]
ENSMUST00000007993	89.2503	0.797842	0.189264	4.21549	2.49231e-05	0.000363018	97.7805	123.234	119.605	64.2889	61.7355	68.8572	Rbm28	ENSMUSG00000029701	RNA binding motif protein 28 [Source:MGI Symbol;Acc:MGI:2655711]
ENSMUST00000008004	6.43431	0.337235	0.704287	0.478832	0.632058	NA	11.7337	2.56738	7.03561	4.87037	6.27819	6.12064	Ddx49	ENSMUSG00000057788	DEAD (Asp-Glu-Ala-Asp) box polypeptide 49 [Source:MGI Symbol;Acc:MGI:2136689]
ENSMUST00000008021	0.360524	2.07797	4.03428	0.515078	0.606498	NA	0	1.28369	0.879451	0	0	0	Tcap	ENSMUSG00000007877	titin-cap [Source:MGI Symbol;Acc:MGI:1330233]
ENSMUST00000008024	8.66165	0.0772354	0.58838	0.131268	0.895563	NA	7.82244	8.98583	9.67397	10.7148	9.41729	5.35556	Arid1a	ENSMUSG00000007880	AT rich interactive domain 1A (SWI-like) [Source:MGI Symbol;Acc:MGI:1935147]
ENSMUST00000008032	0.324692	-1.763	4.03225	-0.437225	0.661948	NA	0	0	0	1.94815	0	0	Crlf1	ENSMUSG00000007888	cytokine receptor-like factor 1 [Source:MGI Symbol;Acc:MGI:1340030]
ENSMUST00000008036	298.129	0.163011	0.110934	1.46945	0.141711	0.374228	309.964	300.383	334.192	269.819	278.333	296.086	Rplp1	ENSMUSG00000007892	ribosomal protein, large, P1 [Source:MGI Symbol;Acc:MGI:1927099]
ENSMUST00000008051	1118.16	0.395426	0.0831865	4.75349	1.99934e-06	3.46445e-05	1339.59	1299.09	1176.71	955.567	885.225	1052.75	Cabs1	ENSMUSG00000007907	calcium binding protein, spermatid specific 1 [Source:MGI Symbol;Acc:MGI:1918227]
ENSMUST00000008088	60.8967	0.556994	0.223143	2.49613	0.0125556	0.0722205	63.5573	75.7377	78.2712	53.5741	46.0401	48.2	Ttc9b	ENSMUSG00000007944	tetratricopeptide repeat domain 9B [Source:MGI Symbol;Acc:MGI:1920282]
ENSMUST00000008090	1.16192	0.339895	3.87946	0.0876139	0.930184	NA	3.91122	0	0	0	0	3.06032	Phox2a	ENSMUSG00000007946	paired-like homeobox 2a [Source:MGI Symbol;Acc:MGI:106633]
ENSMUST00000008094	76.6545	0.457256	0.198881	2.29914	0.0214968	0.107499	83.1134	86.0072	96.7397	58.4445	69.0601	66.5619	Abhd8	ENSMUSG00000007950	abhydrolase domain containing 8 [Source:MGI Symbol;Acc:MGI:1918946]
ENSMUST00000008280	0.803203	-0.766175	3.01998	-0.253702	0.799726	NA	0	0	1.7589	0	0	3.06032	Fhl2	ENSMUSG00000008136	four and a half LIM domains 2 [Source:MGI Symbol;Acc:MGI:1338762]
ENSMUST00000008445	8.4871	-0.256422	0.618527	-0.414569	0.678457	NA	8.80024	2.56738	11.4329	12.663	6.27819	9.18095	Phax	ENSMUSG00000008301	phosphorylated adaptor for RNA export [Source:MGI Symbol;Acc:MGI:1891839]
ENSMUST00000008462	0.453448	0.995579	4.04517	0.246115	0.805593	NA	1.95561	0	0	0	0	0.765079	Relt	ENSMUSG00000008318	RELT tumor necrosis factor receptor [Source:MGI Symbol;Acc:MGI:2443373]
ENSMUST00000008528	7.18011	0.207805	0.658234	0.3157	0.75223	NA	3.91122	11.5532	7.91506	6.81852	5.23183	7.65079	Sertad1	ENSMUSG00000008384	SERTA domain containing 1 [Source:MGI Symbol;Acc:MGI:1913438]
ENSMUST00000008537	198.304	0.401419	0.136234	2.94655	0.00321344	0.0241101	217.073	233.632	226.019	149.033	198.809	165.257	Carhsp1	ENSMUSG00000008393	calcium regulated heat stable protein 1 [Source:MGI Symbol;Acc:MGI:1196368]
ENSMUST00000008542	18.0052	-0.62063	0.449063	-1.38206	0.166954	0.412587	4.88902	24.3901	14.0712	23.3778	19.8809	21.4222	Elk3	ENSMUSG00000008398	ELK3, member of ETS oncogene family [Source:MGI Symbol;Acc:MGI:101762]
ENSMUST00000008573	635.951	1.25918	0.088361	14.2504	4.45524e-46	8.00344e-44	951.404	880.611	859.224	360.408	386.109	377.949	Herpud2	ENSMUSG00000008429	HERPUD family member 2 [Source:MGI Symbol;Acc:MGI:1915393]
ENSMUST00000008579	0.452827	-0.658034	3.77748	-0.174199	0.861709	NA	0.977805	0	0	0.974075	0	0.765079	Rdh13	ENSMUSG00000008435	retinol dehydrogenase 13 (all-trans and 9-cis) [Source:MGI Symbol;Acc:MGI:1918732]
ENSMUST00000008582	94.138	0.00740169	0.178154	0.0415467	0.96686	0.985282	97.7805	93.7094	91.463	89.6149	100.451	91.8095	Adam21	ENSMUSG00000008438	a disintegrin and metallopeptidase domain 21 [Source:MGI Symbol;Acc:MGI:1861229]
ENSMUST00000008605	10.2795	-0.751241	0.564345	-1.33117	0.183132	0.4367	5.86683	6.41845	10.5534	18.5074	7.32456	13.0064	Fut1	ENSMUSG00000008461	fucosyltransferase 1 [Source:MGI Symbol;Acc:MGI:109375]
ENSMUST00000008626	1.27698	-1.38924	1.9075	-0.728306	0.466427	NA	0	1.28369	0.879451	2.92222	1.04637	1.53016	Rnf151	ENSMUSG00000008482	ring finger protein 151 [Source:MGI Symbol;Acc:MGI:1914754]
ENSMUST00000008733	88.3058	0.0840688	0.188011	0.447149	0.654767	0.838457	97.7805	94.993	80.9095	78.9001	81.6165	95.6349	Dnajb6	ENSMUSG00000029131	DnaJ heat shock protein family (Hsp40) member B6 [Source:MGI Symbol;Acc:MGI:1344381]
ENSMUST00000008748	21.9164	0.0197992	0.390901	0.0506503	0.959604	0.98237	13.6893	29.5249	23.7452	15.5852	19.8809	29.073	Ubqln4	ENSMUSG00000008604	ubiquilin 4 [Source:MGI Symbol;Acc:MGI:2150152]
ENSMUST00000008830	3.90462	-0.955411	0.916495	-1.04246	0.297198	NA	3.91122	1.28369	2.63835	6.81852	4.18546	4.59048	Zfp955a	ENSMUSG00000094441	zinc finger protein 955A [Source:MGI Symbol;Acc:MGI:4834570]
ENSMUST00000008847	0.325935	1.95736	4.04517	0.483876	0.628474	NA	1.95561	0	0	0	0	0	Vav1	ENSMUSG00000034116	vav 1 oncogene [Source:MGI Symbol;Acc:MGI:98923]
ENSMUST00000008878	14.3754	0.283276	0.467796	0.605553	0.544811	0.769366	15.6449	20.539	11.4329	18.5074	9.41729	10.7111	Gprc5b	ENSMUSG00000008734	G protein-coupled receptor, family C, group 5, member B [Source:MGI Symbol;Acc:MGI:1927596]
ENSMUST00000008907	73.8057	0.176514	0.204457	0.863329	0.387956	0.651407	74.3132	75.7377	85.3068	63.3149	63.8283	80.3333	Man1a2	ENSMUSG00000008763	mannosidase, alpha, class 1A, member 2 [Source:MGI Symbol;Acc:MGI:104676]
ENSMUST00000008966	0.401602	-0.500283	4.06074	-0.1232	0.901949	NA	0	0	0.879451	0	0	1.53016	Acyp1	ENSMUSG00000008822	acylphosphatase 1, erythrocyte (common) type [Source:MGI Symbol;Acc:MGI:1913454]
ENSMUST00000008987	20.2728	0.598991	0.384715	1.55697	0.119476	0.338036	22.4895	25.6738	25.5041	12.663	14.6491	20.6571	Cldn13	ENSMUSG00000008843	claudin 13 [Source:MGI Symbol;Acc:MGI:1913102]
ENSMUST00000008991	80.6208	-0.416911	0.19807	-2.10487	0.0353026	0.15324	81.1578	59.0497	65.9589	93.5112	98.3583	85.6889	Sptbn2	ENSMUSG00000067889	spectrin beta, non-erythrocytic 2 [Source:MGI Symbol;Acc:MGI:1313261]
ENSMUST00000008999	3.21708	0.205171	1.0919	0.187903	0.850953	NA	7.82244	2.56738	0	1.94815	3.1391	3.8254	Hdac5	ENSMUSG00000008855	histone deacetylase 5 [Source:MGI Symbol;Acc:MGI:1333784]
ENSMUST00000009003	3.13037	-0.779503	1.0668	-0.730693	0.464967	NA	3.91122	1.28369	1.7589	3.8963	1.04637	6.88572	Rala	ENSMUSG00000008859	v-ral simian leukemia viral oncogene A (ras related) [Source:MGI Symbol;Acc:MGI:1927243]
ENSMUST00000009018	9.42271	-0.890598	0.625255	-1.42438	0.154338	0.392198	0.977805	10.2695	8.79451	7.7926	15.6955	13.0064	Clec3a	ENSMUSG00000008874	C-type lectin domain family 3, member a [Source:MGI Symbol;Acc:MGI:2685642]
ENSMUST00000009120	7.48997	-1.04948	0.734081	-1.42965	0.152818	NA	3.91122	2.56738	7.91506	18.5074	2.09273	9.94603	Gabpa	ENSMUSG00000008976	GA repeat binding protein, alpha [Source:MGI Symbol;Acc:MGI:95610]
ENSMUST00000009143	12.0726	0.842976	0.506731	1.66356	0.0962009	0.295477	17.6005	14.1206	14.9507	4.87037	9.41729	11.4762	Bmp7	ENSMUSG00000008999	bone morphogenetic protein 7 [Source:MGI Symbol;Acc:MGI:103302]
ENSMUST00000009157	5.16751	0.299274	0.796472	0.375749	0.707103	NA	3.91122	8.98583	4.39726	7.7926	2.09273	3.8254	Dynll1	ENSMUSG00000009013	dynein light chain LC8-type 1 [Source:MGI Symbol;Acc:MGI:1861457]
ENSMUST00000009174	0.590242	1.33016	3.61041	0.368425	0.712557	NA	0	2.56738	0	0.974075	0	0	Pdcl	ENSMUSG00000009030	phosducin-like [Source:MGI Symbol;Acc:MGI:1914716]
ENSMUST00000009219	30.9561	0.734995	0.319388	2.30126	0.021377	0.107206	38.1344	34.6596	43.0931	15.5852	28.2519	26.0127	Cabp7	ENSMUSG00000009075	calcium binding protein 7 [Source:MGI Symbol;Acc:MGI:2183437]
ENSMUST00000009220	0.635478	2.92121	3.39768	0.859766	0.389918	NA	2.93341	0	0.879451	0	0	0	Zmat5	ENSMUSG00000009076	zinc finger, matrin type 5 [Source:MGI Symbol;Acc:MGI:1914428]
ENSMUST00000009256	47.2312	0.142625	0.251198	0.56778	0.570185	0.786826	44.0012	47.4965	57.1643	42.8593	42.901	48.9651	Bcl2l13	ENSMUSG00000009112	BCL2-like 13 (apoptosis facilitator) [Source:MGI Symbol;Acc:MGI:2136959]
ENSMUST00000009259	0.360524	2.07797	4.03428	0.515078	0.606498	NA	0	1.28369	0.879451	0	0	0	Spatc1l	ENSMUSG00000009115	spermatogenesis and centriole associated 1 like [Source:MGI Symbol;Acc:MGI:1923823]
ENSMUST00000009321	2.82697	-0.845481	1.17056	-0.722289	0.470117	NA	1.95561	1.28369	2.63835	1.94815	8.37092	0.765079	Dgcr8	ENSMUSG00000022718	DGCR8, microprocessor complex subunit [Source:MGI Symbol;Acc:MGI:2151114]
ENSMUST00000009329	0.586301	2.8114	3.89763	0.72131	0.470719	NA	0	0	3.51781	0	0	0	Ccl8	ENSMUSG00000009185	chemokine (C-C motif) ligand 8 [Source:MGI Symbol;Acc:MGI:101878]
ENSMUST00000009354	1.54884	0.680154	1.70044	0.399988	0.689165	NA	3.91122	0	1.7589	0	2.09273	1.53016	Prr29	ENSMUSG00000009210	proline rich 29 [Source:MGI Symbol;Acc:MGI:1922823]
ENSMUST00000009356	0.511756	-0.890002	3.87834	-0.22948	0.818496	NA	0.977805	0	0	0	2.09273	0	Serpinb2	ENSMUSG00000062345	serine (or cysteine) peptidase inhibitor, clade B, member 2 [Source:MGI Symbol;Acc:MGI:97609]
ENSMUST00000009411	18.8984	-0.0453078	0.397531	-0.113973	0.909259	0.96099	21.5117	12.8369	21.1068	15.5852	20.9273	21.4222	Zfp212	ENSMUSG00000052763	Zinc finger protein 212 [Source:MGI Symbol;Acc:MGI:2682609]
ENSMUST00000009435	13.3213	-0.468588	0.53843	-0.870285	0.384145	0.64851	8.80024	16.688	8.79451	18.5074	4.18546	22.9524	Pttg1ip	ENSMUSG00000009291	pituitary tumor-transforming 1 interacting protein [Source:MGI Symbol;Acc:MGI:2652132]
ENSMUST00000009522	0.666775	0.326786	2.91295	0.112184	0.910678	NA	0.977805	1.28369	0	0.974075	0	0.765079	Slc16a12	ENSMUSG00000009378	solute carrier family 16 (monocarboxylic acid transporters), member 12 [Source:MGI Symbol;Acc:MGI:2147716]
ENSMUST00000009538	1.9087	-0.576175	1.50871	-0.381899	0.702536	NA	0.977805	0	3.51781	3.8963	0	3.06032	Syn2	ENSMUSG00000009394	synapsin II [Source:MGI Symbol;Acc:MGI:103020]
ENSMUST00000009550	0.564569	0.261354	3.39707	0.0769351	0.938675	NA	0.977805	0	0.879451	0	0	1.53016	Elk1	ENSMUSG00000009406	ELK1, member of ETS oncogene family [Source:MGI Symbol;Acc:MGI:101833]
ENSMUST00000009689	11.9492	0.909504	0.507264	1.79296	0.0729795	0.249656	18.5783	11.5532	16.7096	6.81852	7.32456	10.7111	Kcnq1	ENSMUSG00000009545	potassium voltage-gated channel, subfamily Q, member 1 [Source:MGI Symbol;Acc:MGI:108083]
ENSMUST00000009695	2.0288	-2.11677	1.55781	-1.35882	0.174205	NA	0	2.56738	0	2.92222	2.09273	4.59048	6330409D20Rik	ENSMUSG00000009551	RIKEN cDNA 6330409D20 gene [Source:MGI Symbol;Acc:MGI:1917980]
ENSMUST00000009727	0.882247	-1.97078	2.4846	-0.793196	0.427663	NA	0.977805	0	0	0.974075	1.04637	2.29524	Syngr1	ENSMUSG00000022415	synaptogyrin 1 [Source:MGI Symbol;Acc:MGI:1328323]
ENSMUST00000009728	0.348788	-1.85356	4.02474	-0.460542	0.645127	NA	0	0	0	0	2.09273	0	Syngr1	ENSMUSG00000022415	synaptogyrin 1 [Source:MGI Symbol;Acc:MGI:1328323]
ENSMUST00000009740	3.67902	-0.670845	1.91363	-0.350561	0.725917	NA	5.86683	0	2.63835	0	2.09273	11.4762	Taf7l	ENSMUSG00000009596	TATA-box binding protein associated factor 7 like [Source:MGI Symbol;Acc:MGI:1921719]
ENSMUST00000009772	44.7428	-0.336811	0.274944	-1.22501	0.22057	0.483968	50.8459	37.227	30.7808	60.3926	38.7155	50.4952	Tex15	ENSMUSG00000009628	testis expressed gene 15 [Source:MGI Symbol;Acc:MGI:1934816]
ENSMUST00000009774	126.876	0.847045	0.164296	5.1556	2.5282e-07	5.00355e-06	170.138	179.717	139.833	89.6149	96.2656	85.6889	Ppp2cb	ENSMUSG00000009630	protein phosphatase 2 (formerly 2A), catalytic subunit, beta isoform [Source:MGI Symbol;Acc:MGI:1321161]
ENSMUST00000009777	0.456118	2.44807	4.00585	0.611123	0.541118	NA	0.977805	0	1.7589	0	0	0	G0s2	ENSMUSG00000009633	G0/G1 switch gene 2 [Source:MGI Symbol;Acc:MGI:1316737]
ENSMUST00000009791	1.47193	0.317385	1.79021	0.17729	0.859281	NA	3.91122	0	0.879451	1.94815	2.09273	0	Mcu	ENSMUSG00000009647	mitochondrial calcium uniporter [Source:MGI Symbol;Acc:MGI:3026965]
ENSMUST00000009798	0.590242	1.33016	3.61041	0.368425	0.712557	NA	0	2.56738	0	0.974075	0	0	Oit3	ENSMUSG00000009654	oncoprotein induced transcript 3 [Source:MGI Symbol;Acc:MGI:1201782]
ENSMUST00000009875	2.31708	-2.61801	1.50237	-1.74259	0.0814049	NA	0.977805	0	0.879451	0.974075	4.18546	6.88572	Kcnd1	ENSMUSG00000009731	potassium voltage-gated channel, Shal-related family, member 1 [Source:MGI Symbol;Acc:MGI:96671]
ENSMUST00000010007	5.42235	0.691776	0.788466	0.87737	0.380286	NA	8.80024	8.98583	2.63835	3.8963	2.09273	6.12064	Sdhb	ENSMUSG00000009863	succinate dehydrogenase complex, subunit B, iron sulfur (Ip) [Source:MGI Symbol;Acc:MGI:1914930]
ENSMUST00000010020	1.49308	-1.86135	1.74994	-1.06367	0.287478	NA	0.977805	0	0.879451	1.94815	2.09273	3.06032	Cox4i2	ENSMUSG00000009876	cytochrome c oxidase subunit 4I2 [Source:MGI Symbol;Acc:MGI:2135755]
ENSMUST00000010038	17.0489	0.648295	0.415193	1.56143	0.118422	0.336032	21.5117	21.8227	19.3479	14.6111	10.4637	14.5365	Snap47	ENSMUSG00000009894	synaptosomal-associated protein, 47 [Source:MGI Symbol;Acc:MGI:1915076]
ENSMUST00000010044	4.52284	1.03512	0.873051	1.18563	0.235767	NA	3.91122	10.2695	4.39726	2.92222	1.04637	4.59048	Wnt3a	ENSMUSG00000009900	wingless-type MMTV integration site family, member 3A [Source:MGI Symbol;Acc:MGI:98956]
ENSMUST00000010049	1.94364	-0.417331	1.45007	-0.2878	0.7735	NA	0.977805	1.28369	2.63835	0	5.23183	1.53016	Kdsr	ENSMUSG00000009905	3-ketodihydrosphingosine reductase [Source:MGI Symbol;Acc:MGI:1918000]
ENSMUST00000010127	5.90803	0.259931	0.789155	0.329379	0.741869	NA	9.77805	8.98583	0.879451	2.92222	5.23183	7.65079	Tktl1	ENSMUSG00000031397	transketolase-like 1 [Source:MGI Symbol;Acc:MGI:1933244]
ENSMUST00000010188	0.661432	-2.78898	3.33351	-0.836648	0.40279	NA	0	0	0	2.92222	1.04637	0	Zmynd10	ENSMUSG00000010044	zinc finger, MYND domain containing 10 [Source:MGI Symbol;Acc:MGI:2387863]
ENSMUST00000010189	51.3287	-0.228664	0.264218	-0.865439	0.386798	0.650917	34.2232	68.0356	41.3342	50.6519	50.2255	63.5016	Tmem115	ENSMUSG00000010045	transmembrane protein 115 [Source:MGI Symbol;Acc:MGI:1930765]
ENSMUST00000010198	3.97199	-0.923907	0.906294	-1.01943	0.307997	NA	3.91122	2.56738	1.7589	6.81852	4.18546	4.59048	Tusc2	ENSMUSG00000010054	tumor suppressor 2, mitochondrial calcium regulator [Source:MGI Symbol;Acc:MGI:1931086]
ENSMUST00000010211	1.67983	-0.0471525	1.47475	-0.0319733	0.974493	NA	1.95561	1.28369	1.7589	0.974075	1.04637	3.06032	Rassf1	ENSMUSG00000010067	Ras association (RalGDS/AF-6) domain family member 1 [Source:MGI Symbol;Acc:MGI:1928386]
ENSMUST00000010241	0.274088	0.167149	4.08047	0.0409631	0.967325	NA	0	0	0.879451	0	0	0.765079	Nxf1	ENSMUSG00000010097	nuclear RNA export factor 1 [Source:MGI Symbol;Acc:MGI:1858330]
ENSMUST00000010248	2.98363	-1.74678	1.13938	-1.5331	0.12525	NA	1.95561	1.28369	0.879451	6.81852	3.1391	3.8254	Tmem223	ENSMUSG00000117924	transmembrane protein 223 [Source:MGI Symbol;Acc:MGI:1914086]
ENSMUST00000010250	13.864	-0.405771	0.47378	-0.856454	0.391746	0.654249	11.7337	7.70214	15.8301	11.6889	20.9273	15.3016	Slc22a6	ENSMUSG00000024650	solute carrier family 22 (organic anion transporter), member 6 [Source:MGI Symbol;Acc:MGI:892001]
ENSMUST00000010278	8.19632	-0.58455	0.618544	-0.945041	0.344638	NA	9.77805	2.56738	7.03561	10.7148	8.37092	10.7111	Wdr77	ENSMUSG00000000561	WD repeat domain 77 [Source:MGI Symbol;Acc:MGI:1917715]
ENSMUST00000010280	18.0665	-0.753855	0.415912	-1.81254	0.0699036	0.242568	14.6671	10.2695	14.9507	29.2222	20.9273	18.3619	Pifo	ENSMUSG00000010136	primary cilia formation [Source:MGI Symbol;Acc:MGI:1923670]
ENSMUST00000010298	2.70308	1.29736	1.23982	1.04641	0.295373	NA	7.82244	0	3.51781	0.974075	3.1391	0.765079	Spire2	ENSMUSG00000010154	spire type actin nucleation factor 2 [Source:MGI Symbol;Acc:MGI:2446256]
ENSMUST00000010421	210.359	-0.402316	0.136096	-2.95613	0.00311527	0.0235443	200.45	191.27	153.904	223.063	233.339	260.127	2610507B11Rik	ENSMUSG00000010277	RIKEN cDNA 2610507B11 gene [Source:MGI Symbol;Acc:MGI:1919753]
ENSMUST00000010434	16.3497	0.568223	0.42911	1.32419	0.18544	0.439361	23.4673	19.2553	15.8301	16.5593	11.51	11.4762	AI597479	ENSMUSG00000010290	expressed sequence AI597479 [Source:MGI Symbol;Acc:MGI:2138299]
ENSMUST00000010451	2.87962	-1.12131	1.18032	-0.950005	0.34211	NA	2.93341	2.56738	0	2.92222	7.32456	1.53016	Tmem86a	ENSMUSG00000010307	transmembrane protein 86A [Source:MGI Symbol;Acc:MGI:1915143]
ENSMUST00000010520	17.085	-0.506398	0.431767	-1.17285	0.240856	0.506737	16.6227	6.41845	18.4685	21.4296	21.9737	17.5968	Nedd8	ENSMUSG00000010376	neural precursor cell expressed, developmentally down-regulated gene 8 [Source:MGI Symbol;Acc:MGI:97301]
ENSMUST00000010536	13.6229	0.17213	0.47822	0.359939	0.718893	0.873342	16.6227	19.2553	7.91506	12.663	11.51	13.7714	Gosr1	ENSMUSG00000010392	golgi SNAP receptor complex member 1 [Source:MGI Symbol;Acc:MGI:1858260]
ENSMUST00000010673	0.657709	-1.44397	3.12878	-0.461514	0.64443	NA	0	0	0.879451	0.974075	2.09273	0	Gm266	ENSMUSG00000010529	predicted gene 266 [Source:MGI Symbol;Acc:MGI:2685112]
ENSMUST00000010795	20.9875	-0.0290914	0.40801	-0.0713008	0.943158	0.973906	13.6893	17.9717	29.9014	19.4815	30.3446	14.5365	Acaa1b	ENSMUSG00000010651	acetyl-Coenzyme A acyltransferase 1B [Source:MGI Symbol;Acc:MGI:3605455]
ENSMUST00000010899	0.928007	2.24302	2.56717	0.873733	0.382264	NA	1.95561	0	2.63835	0.974075	0	0	Cars	ENSMUSG00000010755	cysteinyl-tRNA synthetase [Source:MGI Symbol;Acc:MGI:1351477]
ENSMUST00000010941	12.7333	0.712309	0.914135	0.779216	0.435852	0.691481	22.4895	15.4043	9.67397	0.974075	12.5564	15.3016	Wnt2	ENSMUSG00000010797	wingless-type MMTV integration site family, member 2 [Source:MGI Symbol;Acc:MGI:98954]
ENSMUST00000010974	15.9458	0.135087	0.431599	0.312992	0.754287	0.890983	17.6005	15.4043	16.7096	18.5074	16.7418	10.7111	Kdelr3	ENSMUSG00000010830	KDEL (Lys-Asp-Glu-Leu) endoplasmic reticulum protein retention receptor 3 [Source:MGI Symbol;Acc:MGI:2145953]
ENSMUST00000010985	2.45768	1.51716	1.27748	1.18762	0.234983	NA	2.93341	2.56738	5.27671	2.92222	1.04637	0	Cfap97d1	ENSMUSG00000010841	CFAP97 domain containing 1 [Source:MGI Symbol;Acc:MGI:1922687]
ENSMUST00000011029	1737.5	0.633334	0.0841185	7.52906	5.11052e-14	2.02284e-12	1886.19	2043.63	2407.94	1326.69	1346.67	1413.87	Dnajc19	ENSMUSG00000027679	DnaJ heat shock protein family (Hsp40) member C19 [Source:MGI Symbol;Acc:MGI:1914963]
ENSMUST00000011055	1.60326	4.23162	1.89145	2.23723	0.0252712	NA	4.88902	3.85107	0.879451	0	0	0	Apip	ENSMUSG00000010911	APAF1 interacting protein [Source:MGI Symbol;Acc:MGI:1926788]
ENSMUST00000011058	23.3225	-0.358593	0.353774	-1.01362	0.310763	0.58323	19.5561	21.8227	20.2274	23.3778	25.1128	29.8381	Pdhx	ENSMUSG00000010914	pyruvate dehydrogenase complex, component X [Source:MGI Symbol;Acc:MGI:1351627]
ENSMUST00000011302	13.334	0.0267936	0.481659	0.0556277	0.955638	0.980407	11.7337	12.8369	15.8301	18.5074	7.32456	13.7714	Brf1	ENSMUSG00000011158	BRF1, RNA polymerase III transcription initiation factor 90 kDa subunit [Source:MGI Symbol;Acc:MGI:1919558]
ENSMUST00000011400	1.6132	1.26932	1.6661	0.76185	0.44615	NA	0	5.13476	1.7589	0.974075	1.04637	0.765079	Adam19	ENSMUSG00000011256	a disintegrin and metallopeptidase domain 19 (meltrin beta) [Source:MGI Symbol;Acc:MGI:105377]
ENSMUST00000011450	46.7771	0.185243	0.265852	0.696788	0.485935	0.728574	54.7571	50.0639	44.852	29.2222	51.2719	50.4952	Sugp1	ENSMUSG00000011306	SURP and G patch domain containing 1 [Source:MGI Symbol;Acc:MGI:1917866]
ENSMUST00000011493	93.9206	-0.317238	0.184853	-1.71616	0.0861328	0.276557	88.0024	74.454	87.0657	100.33	120.332	93.3397	Dmrtc2	ENSMUSG00000011349	doublesex and mab-3 related transcription factor like family C2 [Source:MGI Symbol;Acc:MGI:1918491]
ENSMUST00000011526	1.92746	-1.53562	1.53276	-1.00187	0.316408	NA	2.93341	0	0	1.94815	2.09273	4.59048	Dhdh	ENSMUSG00000011382	dihydrodiol dehydrogenase (dimeric) [Source:MGI Symbol;Acc:MGI:1919005]
ENSMUST00000011776	5.77233	-0.868209	0.793164	-1.09461	0.273685	NA	7.82244	2.56738	1.7589	12.663	5.23183	4.59048	Pinlyp	ENSMUSG00000011632	phospholipase A2 inhibitor and LY6/PLAUR domain containing [Source:MGI Symbol;Acc:MGI:3615324]
ENSMUST00000011896	1.13742	-1.13956	2.17431	-0.524102	0.600208	NA	0	1.28369	0.879451	3.8963	0	0.765079	Pgam1	ENSMUSG00000011752	phosphoglycerate mutase 1 [Source:MGI Symbol;Acc:MGI:97552]
ENSMUST00000012186	1.26555	-0.527892	1.8689	-0.282461	0.77759	NA	0.977805	1.28369	0.879451	2.92222	0	1.53016	4930579F01Rik	ENSMUSG00000012042	RIKEN cDNA 4930579F01 gene [Source:MGI Symbol;Acc:MGI:1914991]
ENSMUST00000012279	4.00628	1.31464	0.956344	1.37465	0.169239	NA	7.82244	5.13476	4.39726	0	2.09273	4.59048	Gsc2	ENSMUSG00000022738	goosecoid homebox 2 [Source:MGI Symbol;Acc:MGI:892006]
ENSMUST00000012281	1.13181	0.934005	2.25189	0.414765	0.678314	NA	0.977805	0	3.51781	0	0	2.29524	Bmp5	ENSMUSG00000032179	bone morphogenetic protein 5 [Source:MGI Symbol;Acc:MGI:88181]
ENSMUST00000012314	0.324692	-1.763	4.03225	-0.437225	0.661948	NA	0	0	0	1.94815	0	0	Zfp729a	ENSMUSG00000021510	zinc finger protein 729a [Source:MGI Symbol;Acc:MGI:3036250]
ENSMUST00000012348	1.26642	0.107765	2.1104	0.0510635	0.959275	NA	3.91122	0	0	2.92222	0	0.765079	Gstm2	ENSMUSG00000040562	glutathione S-transferase, mu 2 [Source:MGI Symbol;Acc:MGI:95861]
ENSMUST00000012355	0.627221	-1.32223	2.97735	-0.444096	0.656973	NA	0.977805	0	0	0.974075	1.04637	0.765079	Tex22	ENSMUSG00000012211	testis expressed gene 22 [Source:MGI Symbol;Acc:MGI:1922921]
ENSMUST00000012426	1.21991	0.611033	3.8766	0.157621	0.874756	NA	0	0	4.39726	2.92222	0	0	Wnt8a	ENSMUSG00000012282	wingless-type MMTV integration site family, member 8A [Source:MGI Symbol;Acc:MGI:107924]
ENSMUST00000012587	18.9496	-0.0713622	0.410075	-0.174022	0.861848	0.93876	17.6005	12.8369	24.6246	12.663	23.02	22.9524	Kif11	ENSMUSG00000012443	kinesin family member 11 [Source:MGI Symbol;Acc:MGI:1098231]
ENSMUST00000012627	0.453448	0.995579	4.04517	0.246115	0.805593	NA	1.95561	0	0	0	0	0.765079	Rpa3	ENSMUSG00000012483	replication protein A3 [Source:MGI Symbol;Acc:MGI:1915490]
ENSMUST00000012679	1.06838	-0.113155	2.07002	-0.0546636	0.956407	NA	0.977805	1.28369	0.879451	0.974075	0	2.29524	Tnpo3	ENSMUSG00000012535	transportin 3 [Source:MGI Symbol;Acc:MGI:1196412]
ENSMUST00000012873	0.255026	-1.46206	4.06074	-0.360047	0.718812	NA	0	0	0	0	0	1.53016	Zfp729b	ENSMUSG00000058093	zinc finger protein 729b [Source:MGI Symbol;Acc:MGI:2145180]
ENSMUST00000013220	20.494	-0.562918	0.403456	-1.39524	0.162943	0.406867	10.7559	12.8369	25.5041	29.2222	20.9273	23.7175	Amotl1	ENSMUSG00000013076	angiomotin-like 1 [Source:MGI Symbol;Acc:MGI:1922973]
ENSMUST00000013235	8.14128	-0.235846	0.682811	-0.345404	0.729791	NA	0.977805	10.2695	11.4329	9.74075	4.18546	12.2413	Tmem190	ENSMUSG00000013091	transmembrane protein 190 [Source:MGI Symbol;Acc:MGI:1925302]
ENSMUST00000013294	6.9994	-0.000182229	0.722249	-0.000252308	0.999799	NA	12.7115	6.41845	1.7589	6.81852	10.4637	3.8254	Gfod2	ENSMUSG00000013150	glucose-fructose oxidoreductase domain containing 2 [Source:MGI Symbol;Acc:MGI:1917825]
ENSMUST00000013304	13.2028	-0.388408	0.471391	-0.823962	0.409961	0.667605	11.7337	10.2695	12.3123	16.5593	11.51	16.8317	Atp6v0d1	ENSMUSG00000013160	ATPase, H+ transporting, lysosomal V0 subunit D1 [Source:MGI Symbol;Acc:MGI:1201778]
ENSMUST00000013458	5.70307	0.557065	0.755066	0.73777	0.460654	NA	6.84463	6.41845	7.03561	8.76667	2.09273	3.06032	Adh4	ENSMUSG00000037797	alcohol dehydrogenase 4 (class II), pi polypeptide [Source:MGI Symbol;Acc:MGI:1349472]
ENSMUST00000013497	0.544886	-2.53355	3.68352	-0.687807	0.491574	NA	0	0	0	0.974075	0	2.29524	4931406B18Rik	ENSMUSG00000013353	RIKEN cDNA 4931406B18 gene [Source:MGI Symbol;Acc:MGI:1921304]
ENSMUST00000013559	9.36623	-0.685871	0.594513	-1.15367	0.248636	0.515215	5.86683	12.8369	3.51781	9.74075	10.4637	13.7714	Igf2bp1	ENSMUSG00000013415	insulin-like growth factor 2 mRNA binding protein 1 [Source:MGI Symbol;Acc:MGI:1890357]
ENSMUST00000013797	22.7676	-0.115737	0.354108	-0.326842	0.743788	0.88773	21.5117	23.1064	21.1068	23.3778	23.02	24.4825	1810065E05Rik	ENSMUSG00000013653	RIKEN cDNA 1810065E05 gene [Source:MGI Symbol;Acc:MGI:1917114]
ENSMUST00000013807	79.1177	0.476406	0.207078	2.30061	0.0214134	0.107311	92.8915	100.128	84.4273	49.6778	68.0137	79.5683	Pten	ENSMUSG00000013663	phosphatase and tensin homolog [Source:MGI Symbol;Acc:MGI:109583]
ENSMUST00000013845	0.38254	-2.03581	4.01094	-0.507563	0.61176	NA	0	0	0	0	0	2.29524	Timm23	ENSMUSG00000013701	translocase of inner mitochondrial membrane 23 [Source:MGI Symbol;Acc:MGI:1858317]
ENSMUST00000013851	3.63718	-0.569942	0.965928	-0.590047	0.555159	NA	1.95561	1.28369	5.27671	2.92222	7.32456	3.06032	Tnfaip8l2	ENSMUSG00000013707	tumor necrosis factor, alpha-induced protein 8-like 2 [Source:MGI Symbol;Acc:MGI:1917019]
ENSMUST00000013910	0.453448	0.995579	4.04517	0.246115	0.805593	NA	1.95561	0	0	0	0	0.765079	Ly6g6e	ENSMUSG00000013766	lymphocyte antigen 6 complex, locus G6E [Source:MGI Symbol;Acc:MGI:1917524]
ENSMUST00000013949	0.838658	0.235629	2.6988	0.0873089	0.930426	NA	0.977805	0	1.7589	0	0	2.29524	Birc3	ENSMUSG00000032000	baculoviral IAP repeat-containing 3 [Source:MGI Symbol;Acc:MGI:1197007]
ENSMUST00000013970	27.4512	-0.122844	0.328924	-0.373473	0.708796	0.868	32.2676	21.8227	24.6246	25.3259	29.2982	31.3683	Pip4k2c	ENSMUSG00000025417	phosphatidylinositol-5-phosphate 4-kinase, type II, gamma [Source:MGI Symbol;Acc:MGI:2152214]
ENSMUST00000014022	1.20259	-2.51386	2.07765	-1.20995	0.226297	NA	0	0	0.879451	1.94815	2.09273	2.29524	Rnf170	ENSMUSG00000013878	ring finger protein 170 [Source:MGI Symbol;Acc:MGI:1924983]
ENSMUST00000014065	0.729585	0.626989	2.96074	0.211768	0.832288	NA	0	0	2.63835	0.974075	0	0.765079	Clip3	ENSMUSG00000013921	CAP-GLY domain containing linker protein 3 [Source:MGI Symbol;Acc:MGI:1923936]
ENSMUST00000014174	12.8121	0.0575134	0.492153	0.116861	0.90697	0.959854	10.7559	19.2553	9.67397	8.76667	14.6491	13.7714	Pax5	ENSMUSG00000014030	paired box 5 [Source:MGI Symbol;Acc:MGI:97489]
ENSMUST00000014290	2.02507	0.784159	1.39858	0.560683	0.575014	NA	5.86683	0	1.7589	1.94815	1.04637	1.53016	Apbb1ip	ENSMUSG00000026786	amyloid beta (A4) precursor protein-binding, family B, member 1 interacting protein [Source:MGI Symbol;Acc:MGI:1861354]
ENSMUST00000014321	4.152	-1.63333	1.00226	-1.62965	0.103175	NA	0.977805	2.56738	2.63835	0.974075	6.27819	11.4762	Tvp23b	ENSMUSG00000014177	trans-golgi network vesicle protein 23B [Source:MGI Symbol;Acc:MGI:1914760]
ENSMUST00000014339	184.645	0.791454	0.133581	5.92491	3.12463e-09	7.81828e-08	229.784	238.766	233.934	129.552	138.12	137.714	Dnajc7	ENSMUSG00000014195	DnaJ heat shock protein family (Hsp40) member C7 [Source:MGI Symbol;Acc:MGI:1928373]
ENSMUST00000014370	7.39322	0.238398	0.656295	0.363248	0.71642	NA	5.86683	11.5532	7.03561	6.81852	3.1391	9.94603	Cacybp	ENSMUSG00000014226	calcyclin binding protein [Source:MGI Symbol;Acc:MGI:1270839]
ENSMUST00000014389	4.90638	0.060747	0.879747	0.0690506	0.944949	NA	2.93341	11.5532	0.879451	2.92222	7.32456	3.8254	Pigl	ENSMUSG00000014245	phosphatidylinositol glycan anchor biosynthesis, class L [Source:MGI Symbol;Acc:MGI:2681271]
ENSMUST00000014421	0.348788	-1.85356	4.02474	-0.460542	0.645127	NA	0	0	0	0	2.09273	0	Ankrd17	ENSMUSG00000055204	ankyrin repeat domain 17 [Source:MGI Symbol;Acc:MGI:1932101]
ENSMUST00000014438	28.317	-0.276401	0.356093	-0.776205	0.437628	0.693043	13.6893	32.0922	31.6603	23.3778	29.2982	39.7841	Ndufa2	ENSMUSG00000014294	NADH:ubiquinone oxidoreductase subunit A2 [Source:MGI Symbol;Acc:MGI:1343103]
ENSMUST00000014499	16.4154	0.294141	0.429304	0.685159	0.493244	0.733542	17.6005	14.1206	21.9863	12.663	19.8809	12.2413	Anapc1	ENSMUSG00000014355	anaphase promoting complex subunit 1 [Source:MGI Symbol;Acc:MGI:103097]
ENSMUST00000014505	0.958304	-2.12362	2.76719	-0.767429	0.442826	NA	0	0	0.879451	4.87037	0	0	Mertk	ENSMUSG00000014361	MER proto-oncogene tyrosine kinase [Source:MGI Symbol;Acc:MGI:96965]
ENSMUST00000014545	0.591766	-2.64233	3.23236	-0.817463	0.413664	NA	0	0	0	0.974075	1.04637	1.53016	Ldhc	ENSMUSG00000030851	lactate dehydrogenase C [Source:MGI Symbol;Acc:MGI:96764]
ENSMUST00000014578	0.562737	-0.887481	3.69787	-0.239998	0.810332	NA	0	1.28369	0	0	2.09273	0	Plg	ENSMUSG00000059481	plasminogen [Source:MGI Symbol;Acc:MGI:97620]
ENSMUST00000014597	14.8525	0.251894	0.446717	0.563879	0.572837	0.788621	13.6893	17.9717	16.7096	10.7148	17.7882	12.2413	Blk	ENSMUSG00000014453	B lymphoid kinase [Source:MGI Symbol;Acc:MGI:88169]
ENSMUST00000014614	13.3419	-0.0172308	0.482767	-0.0356918	0.971528	0.988028	16.6227	12.8369	10.5534	7.7926	14.6491	17.5968	Rnf166	ENSMUSG00000014470	ring finger protein 166 [Source:MGI Symbol;Acc:MGI:1915968]
ENSMUST00000014642	5.74319	-1.71034	0.799563	-2.13909	0.0324285	NA	4.88902	1.28369	1.7589	9.74075	8.37092	8.41587	Ankrd52	ENSMUSG00000014498	ankyrin repeat domain 52 [Source:MGI Symbol;Acc:MGI:2444029]
ENSMUST00000014647	336.143	-0.142756	0.106588	-1.33932	0.180465	0.43279	310.942	304.234	342.107	336.056	366.228	357.292	Pkd2l2	ENSMUSG00000014503	polycystic kidney disease 2-like 2 [Source:MGI Symbol;Acc:MGI:1858231]
ENSMUST00000014673	0.471267	-0.801225	4.03225	-0.198704	0.842494	NA	0	0	0.879451	1.94815	0	0	Tmbim7	ENSMUSG00000014529	transmembrane BAX inhibitor motif containing 7 [Source:MGI Symbol;Acc:MGI:1922305]
ENSMUST00000014684	0.848804	2.05622	2.54768	0.807096	0.419611	NA	1.95561	1.28369	0.879451	0.974075	0	0	U2af1	ENSMUSG00000061613	U2 small nuclear ribonucleoprotein auxiliary factor (U2AF) 1 [Source:MGI Symbol;Acc:MGI:98884]
ENSMUST00000014691	8.91125	-0.0405968	0.571747	-0.0710049	0.943394	NA	6.84463	8.98583	10.5534	8.76667	8.37092	9.94603	Wdfy2	ENSMUSG00000014547	WD repeat and FYVE domain containing 2 [Source:MGI Symbol;Acc:MGI:2442811]
ENSMUST00000014694	5.65359	0.0914247	0.724823	0.126134	0.899626	NA	5.86683	6.41845	5.27671	6.81852	4.18546	5.35556	Rbsn	ENSMUSG00000014550	rabenosyn, RAB effector [Source:MGI Symbol;Acc:MGI:1925537]
ENSMUST00000014695	0.821299	0.510154	2.75859	0.184933	0.853281	NA	1.95561	0	0.879451	0	2.09273	0	Mrps25	ENSMUSG00000014551	mitochondrial ribosomal protein S25 [Source:MGI Symbol;Acc:MGI:1928140]
ENSMUST00000014750	1.05664	-2.27569	2.24408	-1.01409	0.310541	NA	0.977805	0	0	0.974075	2.09273	2.29524	Slc25a11	ENSMUSG00000014606	solute carrier family 25 (mitochondrial carrier oxoglutarate carrier), member 11 [Source:MGI Symbol;Acc:MGI:1915113]
ENSMUST00000014830	1.67799	-0.386377	1.50124	-0.257372	0.796891	NA	0.977805	2.56738	0.879451	0.974075	3.1391	1.53016	Ceacam16	ENSMUSG00000014686	carcinoembryonic antigen-related cell adhesion molecule 16 [Source:MGI Symbol;Acc:MGI:2685615]
ENSMUST00000014848	0.308921	0.167149	4.08047	0.0409631	0.967325	NA	0	0	0.879451	0.974075	0	0	Hoxa2	ENSMUSG00000014704	homeobox A2 [Source:MGI Symbol;Acc:MGI:96174]
ENSMUST00000014891	5.41469	1.07832	0.787597	1.36913	0.170958	NA	8.80024	6.41845	7.03561	0.974075	3.1391	6.12064	Ankrd53	ENSMUSG00000014747	ankyrin repeat domain 53 [Source:MGI Symbol;Acc:MGI:1922555]
ENSMUST00000014892	23.7468	-0.272325	0.362399	-0.75145	0.452382	0.704465	23.4673	15.4043	25.5041	25.3259	19.8809	32.8984	Tex261	ENSMUSG00000014748	testis expressed gene 261 [Source:MGI Symbol;Acc:MGI:1096575]
ENSMUST00000014917	10.5886	0.142	0.546627	0.259776	0.795037	0.910141	13.6893	11.5532	7.91506	7.7926	15.6955	6.88572	Dll1	ENSMUSG00000014773	delta like canonical Notch ligand 1 [Source:MGI Symbol;Acc:MGI:104659]
ENSMUST00000014920	47.6053	0.26181	0.258646	1.01223	0.311427	0.583496	44.0012	68.0356	44.852	39.9371	42.901	45.9048	Nol3	ENSMUSG00000014776	nucleolar protein 3 (apoptosis repressor with CARD domain) [Source:MGI Symbol;Acc:MGI:1925938]
ENSMUST00000014922	0.255026	-1.46206	4.06074	-0.360047	0.718812	NA	0	0	0	0	0	1.53016	Fhod1	ENSMUSG00000014778	formin homology 2 domain containing 1 [Source:MGI Symbol;Acc:MGI:2679008]
ENSMUST00000014927	2.29194	-1.45449	1.41006	-1.03151	0.302302	NA	0	0	3.51781	0.974075	3.1391	6.12064	Plekhg4	ENSMUSG00000014782	pleckstrin homology domain containing, family G (with RhoGef domain) member 4 [Source:MGI Symbol;Acc:MGI:2142544]
ENSMUST00000014957	110.197	-0.474714	0.177425	-2.67557	0.00746013	0.0485741	110.492	75.7377	88.8246	128.578	141.259	116.292	Stc1	ENSMUSG00000014813	stanniocalcin 1 [Source:MGI Symbol;Acc:MGI:109131]
ENSMUST00000014981	6.6807	0.649875	0.66788	0.973042	0.330533	NA	8.80024	7.70214	7.91506	5.84445	5.23183	4.59048	4931428F04Rik	ENSMUSG00000014837	RIKEN cDNA 4931428F04 gene [Source:MGI Symbol;Acc:MGI:1921606]
ENSMUST00000014990	6.17616	-0.989976	0.796949	-1.24221	0.21416	NA	1.95561	10.2695	0.879451	4.87037	8.37092	10.7111	Tppp3	ENSMUSG00000014846	tubulin polymerization-promoting protein family member 3 [Source:MGI Symbol;Acc:MGI:1915221]
ENSMUST00000015003	24.9287	0.16397	0.342142	0.479246	0.631763	0.825002	28.3563	28.2412	22.8657	22.4037	20.9273	26.7778	E2f4	ENSMUSG00000014859	E2F transcription factor 4 [Source:MGI Symbol;Acc:MGI:103012]
ENSMUST00000015011	100.684	-0.499558	0.177035	-2.8218	0.0047755	0.0334237	73.3354	84.7235	92.3424	114.941	114.054	124.708	Surf4	ENSMUSG00000014867	surfeit gene 4 [Source:MGI Symbol;Acc:MGI:98445]
ENSMUST00000015017	2.55231	-0.845687	2.0063	-0.421515	0.673379	NA	2.93341	2.56738	0	8.76667	1.04637	0	Surf2	ENSMUSG00000014873	surfeit gene 2 [Source:MGI Symbol;Acc:MGI:98444]
ENSMUST00000015049	47.6236	0.888694	0.256693	3.46209	0.00053599	0.00542651	63.5573	68.0356	54.526	37.9889	27.2055	34.4286	Dnajb9	ENSMUSG00000014905	DnaJ heat shock protein family (Hsp40) member B9 [Source:MGI Symbol;Acc:MGI:1351618]
ENSMUST00000015100	6.32404	-0.422296	0.754242	-0.559894	0.575552	NA	10.7559	3.85107	1.7589	4.87037	5.23183	11.4762	Ppp1cb	ENSMUSG00000014956	protein phosphatase 1 catalytic subunit beta [Source:MGI Symbol;Acc:MGI:104871]
ENSMUST00000015146	16.9829	-0.103805	0.428345	-0.242339	0.808518	0.914658	12.7115	19.2553	17.589	20.4556	10.4637	21.4222	Efr3a	ENSMUSG00000015002	EFR3 homolog A [Source:MGI Symbol;Acc:MGI:1923990]
ENSMUST00000015157	12.4815	0.370224	0.510101	0.725785	0.467971	0.716165	14.6671	19.2553	8.79451	5.84445	12.5564	13.7714	Trappc2l	ENSMUSG00000015013	trafficking protein particle complex 2-like [Source:MGI Symbol;Acc:MGI:1916295]
ENSMUST00000015171	14.2627	0.151765	0.514218	0.295137	0.767889	0.897237	22.4895	5.13476	16.7096	7.7926	21.9737	11.4762	Galns	ENSMUSG00000015027	galactosamine (N-acetyl)-6-sulfate sulfatase [Source:MGI Symbol;Acc:MGI:1355303]
ENSMUST00000015227	57.8268	-0.0445751	0.229538	-0.194195	0.846023	0.932237	54.7571	57.766	58.9233	53.5741	52.3183	69.6222	C8g	ENSMUSG00000015083	complement component 8, gamma polypeptide [Source:MGI Symbol;Acc:MGI:88237]
ENSMUST00000015239	12.6759	-0.189334	0.495563	-0.382058	0.702418	0.865484	14.6671	11.5532	9.67397	12.663	8.37092	19.127	Fbxw5	ENSMUSG00000015095	F-box and WD-40 domain protein 5 [Source:MGI Symbol;Acc:MGI:1354731]
ENSMUST00000015277	1.69498	-1.19671	1.52194	-0.786302	0.431691	NA	0.977805	1.28369	0.879451	2.92222	1.04637	3.06032	Lrrk1	ENSMUSG00000015133	leucine-rich repeat kinase 1 [Source:MGI Symbol;Acc:MGI:2142227]
ENSMUST00000015278	0.932326	2.24929	2.60827	0.862369	0.388485	NA	0.977805	3.85107	0	0	0	0.765079	Aldh1a3	ENSMUSG00000015134	aldehyde dehydrogenase family 1, subfamily A3 [Source:MGI Symbol;Acc:MGI:1861722]
ENSMUST00000015333	7.7918	0.742924	0.639316	1.16206	0.245211	NA	12.7115	5.13476	11.4329	4.87037	4.18546	8.41587	Casd1	ENSMUSG00000015189	CAS1 domain containing 1 [Source:MGI Symbol;Acc:MGI:2384865]
ENSMUST00000015346	4.01227	0.981521	0.911419	1.07691	0.281518	NA	5.86683	7.70214	2.63835	1.94815	2.09273	3.8254	Cnksr3	ENSMUSG00000015202	Cnksr family member 3 [Source:MGI Symbol;Acc:MGI:2674130]
ENSMUST00000015449	19.2546	-0.443438	0.409088	-1.08397	0.278379	0.548998	21.5117	17.9717	9.67397	18.5074	27.2055	20.6571	Sash1	ENSMUSG00000015305	SAM and SH3 domain containing 1 [Source:MGI Symbol;Acc:MGI:1917347]
ENSMUST00000015456	0.669445	1.62051	3.09738	0.523188	0.600843	NA	0	1.28369	1.7589	0.974075	0	0	Gadd45b	ENSMUSG00000015312	growth arrest and DNA-damage-inducible 45 beta [Source:MGI Symbol;Acc:MGI:107776]
ENSMUST00000015460	0.255026	-1.46206	4.06074	-0.360047	0.718812	NA	0	0	0	0	0	1.53016	Slamf1	ENSMUSG00000015316	signaling lymphocytic activation molecule family member 1 [Source:MGI Symbol;Acc:MGI:1351314]
ENSMUST00000015467	15.8226	-1.04675	0.455062	-2.30025	0.0214343	0.107311	7.82244	12.8369	10.5534	14.6111	26.1591	22.9524	Slc39a1	ENSMUSG00000052310	solute carrier family 39 (zinc transporter), member 1 [Source:MGI Symbol;Acc:MGI:1353474]
ENSMUST00000015481	667.434	-0.160908	0.0837438	-1.92143	0.0546778	0.204961	632.64	618.738	637.602	739.323	708.389	667.914	Endog	ENSMUSG00000015337	endonuclease G [Source:MGI Symbol;Acc:MGI:1261433]
ENSMUST00000015484	1.35414	-0.859692	1.77412	-0.484574	0.627979	NA	1.95561	0	0.879451	1.94815	1.04637	2.29524	Cybb	ENSMUSG00000015340	cytochrome b-245, beta polypeptide [Source:MGI Symbol;Acc:MGI:88574]
ENSMUST00000015486	17.5706	0.949136	0.415888	2.28219	0.022478	0.111137	27.3785	19.2553	22.8657	11.6889	10.4637	13.7714	Xk	ENSMUSG00000015342	X-linked Kx blood group [Source:MGI Symbol;Acc:MGI:103569]
ENSMUST00000015498	3.89258	1.55854	1.05053	1.48358	0.137921	NA	1.95561	12.8369	2.63835	0.974075	4.18546	0.765079	Pcolce2	ENSMUSG00000015354	procollagen C-endopeptidase enhancer 2 [Source:MGI Symbol;Acc:MGI:1923727]
ENSMUST00000015509	0.325935	1.95736	4.04517	0.483876	0.628474	NA	1.95561	0	0	0	0	0	Mov10l1	ENSMUSG00000015365	Mov10 like RISC complex RNA helicase 1 [Source:MGI Symbol;Acc:MGI:1891384]
ENSMUST00000015511	9.12115	-1.15878	1.04048	-1.1137	0.265407	0.535474	8.80024	0	7.91506	5.84445	11.51	20.6571	Plxnd1	ENSMUSG00000030123	plexin D1 [Source:MGI Symbol;Acc:MGI:2154244]
ENSMUST00000015581	1.61723	-0.70582	1.7169	-0.4111	0.680999	NA	0	3.85107	0	1.94815	3.1391	0.765079	Gzmb	ENSMUSG00000015437	granzyme B [Source:MGI Symbol;Acc:MGI:109267]
ENSMUST00000015585	3.18634	0.14673	0.983631	0.149171	0.881418	NA	3.91122	2.56738	3.51781	2.92222	3.1391	3.06032	Gzmc	ENSMUSG00000079186	granzyme C [Source:MGI Symbol;Acc:MGI:109256]
ENSMUST00000015605	1.92901	0.797416	1.47447	0.540814	0.588636	NA	2.93341	0	4.39726	1.94815	0	2.29524	Atf6b	ENSMUSG00000015461	activating transcription factor 6 beta [Source:MGI Symbol;Acc:MGI:105121]
ENSMUST00000015612	1.12165	-0.275778	2.12974	-0.129489	0.89697	NA	0	1.28369	1.7589	2.92222	0	0.765079	Notch4	ENSMUSG00000015468	notch 4 [Source:MGI Symbol;Acc:MGI:107471]
ENSMUST00000015622	0.429421	-2.18309	4.00096	-0.545642	0.585312	NA	0	0	0	0	1.04637	1.53016	Rnf5	ENSMUSG00000015478	ring finger protein 5 [Source:MGI Symbol;Acc:MGI:1860076]
ENSMUST00000015628	1.27847	0.0911612	1.96932	0.0462908	0.963078	NA	3.91122	0	0	1.94815	1.04637	0.765079	Fam163a	ENSMUSG00000015484	family with sequence similarity 163, member A [Source:MGI Symbol;Acc:MGI:3618859]
ENSMUST00000015664	0.936142	-0.950415	2.26864	-0.418936	0.675263	NA	0.977805	0	0.879451	1.94815	1.04637	0.765079	Ctsk	ENSMUSG00000028111	cathepsin K [Source:MGI Symbol;Acc:MGI:107823]
ENSMUST00000015712	0.748647	1.86028	3.16004	0.588688	0.55607	NA	0	0	3.51781	0.974075	0	0	Lpl	ENSMUSG00000015568	lipoprotein lipase [Source:MGI Symbol;Acc:MGI:96820]
ENSMUST00000015749	33.6725	-0.11806	0.320202	-0.368705	0.712347	0.869671	37.1566	33.3759	26.3835	50.6519	26.1591	28.3079	Srf	ENSMUSG00000015605	serum response factor [Source:MGI Symbol;Acc:MGI:106658]
ENSMUST00000015791	24.3076	-0.261459	0.348967	-0.749237	0.453714	0.705755	17.6005	24.3901	24.6246	25.3259	24.0664	29.8381	Lama5	ENSMUSG00000015647	laminin, alpha 5 [Source:MGI Symbol;Acc:MGI:105382]
ENSMUST00000015812	8.15632	-0.358955	0.630479	-0.569337	0.569127	NA	12.7115	5.13476	3.51781	9.74075	9.41729	8.41587	Pdzd11	ENSMUSG00000015668	PDZ domain containing 11 [Source:MGI Symbol;Acc:MGI:1919871]
ENSMUST00000015829	2.36994	-0.889695	1.33392	-0.666979	0.504786	NA	4.88902	0	0	3.8963	3.1391	2.29524	Acadsb	ENSMUSG00000030861	acyl-Coenzyme A dehydrogenase, short/branched chain [Source:MGI Symbol;Acc:MGI:1914135]
ENSMUST00000015855	17.3899	0.219099	0.458463	0.477899	0.632722	0.825387	11.7337	15.4043	29.0219	8.76667	15.6955	23.7175	Prune1	ENSMUSG00000015711	prune exopolyphosphatase [Source:MGI Symbol;Acc:MGI:1925152]
ENSMUST00000015858	25.8317	-0.147616	0.362891	-0.406778	0.684171	0.85541	26.4007	17.9717	28.1424	24.3519	39.7619	18.3619	Cers2	ENSMUSG00000015714	ceramide synthase 2 [Source:MGI Symbol;Acc:MGI:1924143]
ENSMUST00000015877	2.39798	0.553063	1.24367	0.444704	0.656534	NA	2.93341	1.28369	4.39726	1.94815	0	3.8254	Capza2	ENSMUSG00000015733	capping protein (actin filament) muscle Z-line, alpha 2 [Source:MGI Symbol;Acc:MGI:106222]
ENSMUST00000015889	0.634856	1.54012	3.17877	0.484503	0.628029	NA	1.95561	0	0.879451	0.974075	0	0	Plekho1	ENSMUSG00000015745	pleckstrin homology domain containing, family O member 1 [Source:MGI Symbol;Acc:MGI:1914470]
ENSMUST00000015891	10.2356	-0.620134	0.559282	-1.10881	0.267514	0.537484	9.77805	10.2695	4.39726	16.5593	10.4637	9.94603	Vps45	ENSMUSG00000015747	vacuolar protein sorting 45 [Source:MGI Symbol;Acc:MGI:891965]
ENSMUST00000015892	0.927604	0.805525	2.43473	0.330848	0.740759	NA	0.977805	2.56738	0	0.974075	1.04637	0	Prpf3	ENSMUSG00000015748	pre-mRNA processing factor 3 [Source:MGI Symbol;Acc:MGI:1918017]
ENSMUST00000015894	0.935089	0.831444	2.76134	0.301102	0.763337	NA	0	0	3.51781	0	2.09273	0	Aph1a	ENSMUSG00000015750	aph1 homolog A, gamma secretase subunit [Source:MGI Symbol;Acc:MGI:2385110]
ENSMUST00000015901	6.84185	-1.03606	0.684922	-1.51266	0.130365	NA	4.88902	5.13476	3.51781	6.81852	11.51	9.18095	Ppil4	ENSMUSG00000015757	peptidylprolyl isomerase (cyclophilin)-like 4 [Source:MGI Symbol;Acc:MGI:1914668]
ENSMUST00000015903	2.13082	-0.482482	1.27595	-0.378134	0.705331	NA	1.95561	2.56738	0.879451	1.94815	3.1391	2.29524	Cnih1	ENSMUSG00000015759	cornichon family AMPA receptor auxiliary protein 1 [Source:MGI Symbol;Acc:MGI:1277202]
ENSMUST00000015934	0.574472	2.74342	3.59989	0.762085	0.446009	NA	0	2.56738	0.879451	0	0	0	Surf1	ENSMUSG00000015790	surfeit gene 1 [Source:MGI Symbol;Acc:MGI:98443]
ENSMUST00000015941	3.00459	0.443614	1.11597	0.397516	0.690987	NA	6.84463	2.56738	0.879451	0.974075	5.23183	1.53016	Bhmt2	ENSMUSG00000042118	betaine-homocysteine methyltransferase 2 [Source:MGI Symbol;Acc:MGI:1891379]
ENSMUST00000015981	92.9158	0.365989	0.18379	1.99134	0.0464439	0.183834	104.625	96.2767	111.69	87.6667	86.8483	70.3873	Sqstm1	ENSMUSG00000015837	sequestosome 1 [Source:MGI Symbol;Acc:MGI:107931]
ENSMUST00000015998	9.67064	-0.320624	0.58907	-0.544288	0.586243	0.797054	3.91122	15.4043	7.03561	13.637	7.32456	10.7111	Cd5l	ENSMUSG00000015854	CD5 antigen-like [Source:MGI Symbol;Acc:MGI:1334419]
ENSMUST00000016023	4.63045	0.412088	0.820561	0.502203	0.615525	NA	7.82244	2.56738	5.27671	4.87037	4.18546	3.06032	Fam184b	ENSMUSG00000015879	family with sequence similarity 184, member B [Source:MGI Symbol;Acc:MGI:2442958]
ENSMUST00000016033	1.04994	0.00865954	2.36714	0.00365823	0.997081	NA	1.95561	1.28369	0	0	0	3.06032	Lta4h	ENSMUSG00000015889	leukotriene A4 hydrolase [Source:MGI Symbol;Acc:MGI:96836]
ENSMUST00000016034	0.504429	1.17022	3.5924	0.32575	0.744614	NA	0.977805	1.28369	0	0	0	0.765079	Amdhd1	ENSMUSG00000015890	amidohydrolase domain containing 1 [Source:MGI Symbol;Acc:MGI:1919011]
ENSMUST00000016086	14.7699	-0.168156	0.475405	-0.35371	0.723556	0.876549	22.4895	7.70214	11.4329	11.6889	14.6491	20.6571	Gtf2ird2	ENSMUSG00000015942	GTF2I repeat domain containing 2 [Source:MGI Symbol;Acc:MGI:2149780]
ENSMUST00000016088	5.89866	-0.570345	0.819783	-0.695727	0.4866	NA	1.95561	1.28369	10.5534	2.92222	12.5564	6.12064	Castor2	ENSMUSG00000015944	cytosolic arginine sensor for mTORC1 subunit 2 [Source:MGI Symbol;Acc:MGI:1933384]
ENSMUST00000016105	7.26742	-0.439303	0.673269	-0.652492	0.514084	NA	8.80024	2.56738	7.03561	4.87037	7.32456	13.0064	Adss	ENSMUSG00000015961	adenylosuccinate synthetase, non muscle [Source:MGI Symbol;Acc:MGI:87948]
ENSMUST00000016106	70.1684	0.712757	0.212175	3.35929	0.00078144	0.007541	92.8915	87.2909	81.789	42.8593	56.5037	59.6762	1700016C15Rik	ENSMUSG00000015962	RIKEN cDNA 1700016C15 gene [Source:MGI Symbol;Acc:MGI:1916678]
ENSMUST00000016124	0.975318	-0.959859	2.70891	-0.354334	0.723089	NA	1.95561	0	0	3.8963	0	0	Lrrc27	ENSMUSG00000015980	leucine rich repeat containing 27 [Source:MGI Symbol;Acc:MGI:1923862]
ENSMUST00000016125	0.700986	-1.3857	3.28555	-0.421757	0.673202	NA	0	1.28369	0	2.92222	0	0	Stk32c	ENSMUSG00000015981	serine/threonine kinase 32C [Source:MGI Symbol;Acc:MGI:2385336]
ENSMUST00000016138	10.2343	-0.243179	0.544988	-0.446209	0.655446	0.838457	8.80024	11.5532	7.91506	15.5852	8.37092	9.18095	Fnta	ENSMUSG00000015994	farnesyltransferase, CAAX box, alpha [Source:MGI Symbol;Acc:MGI:104683]
ENSMUST00000016143	7.48922	-0.153667	0.654621	-0.234742	0.814409	NA	9.77805	6.41845	5.27671	3.8963	7.32456	12.2413	Wasf3	ENSMUSG00000029636	WAS protein family, member 3 [Source:MGI Symbol;Acc:MGI:2658986]
ENSMUST00000016144	70.7883	-0.148745	0.214637	-0.693005	0.488306	0.730219	74.3132	55.1987	70.3561	78.9001	84.7556	61.2064	Plpp1	ENSMUSG00000021759	phospholipid phosphatase 1 [Source:MGI Symbol;Acc:MGI:108412]
ENSMUST00000016168	0.600023	1.53895	3.26882	0.470798	0.637785	NA	1.95561	0	0.879451	0	0	0.765079	Lbp	ENSMUSG00000016024	lipopolysaccharide binding protein [Source:MGI Symbol;Acc:MGI:1098776]
ENSMUST00000016172	0.448483	-0.705943	3.79395	-0.186071	0.852389	NA	0	0	0.879451	0	1.04637	0.765079	Celsr1	ENSMUSG00000016028	cadherin, EGF LAG seven-pass G-type receptor 1 [Source:MGI Symbol;Acc:MGI:1100883]
ENSMUST00000016231	0.417372	-2.14718	4.0033	-0.536353	0.591715	NA	0	0	0	0.974075	0	1.53016	Fli1	ENSMUSG00000016087	Friend leukemia integration 1 [Source:MGI Symbol;Acc:MGI:95554]
ENSMUST00000016323	1.14475	-2.41345	2.30833	-1.04554	0.295773	NA	0	0	0.879451	3.8963	2.09273	0	Camk1g	ENSMUSG00000016179	calcium/calmodulin-dependent protein kinase I gamma [Source:MGI Symbol;Acc:MGI:2388073]
ENSMUST00000016338	0.29315	1.84622	4.0531	0.45551	0.648743	NA	0	0	1.7589	0	0	0	Hsd11b1	ENSMUSG00000016194	hydroxysteroid 11-beta dehydrogenase 1 [Source:MGI Symbol;Acc:MGI:103562]
ENSMUST00000016383	6.69331	1.01664	0.704176	1.44373	0.148816	NA	8.80024	3.85107	14.0712	3.8963	4.18546	5.35556	Lonrf3	ENSMUSG00000016239	LON peptidase N-terminal domain and ring finger 3 [Source:MGI Symbol;Acc:MGI:1921615]
ENSMUST00000016400	7.51438	0.217636	0.67085	0.324418	0.745622	NA	10.7559	6.41845	7.03561	12.663	2.09273	6.12064	Ctsz	ENSMUSG00000016256	cathepsin Z [Source:MGI Symbol;Acc:MGI:1891190]
ENSMUST00000016401	1.75863	-0.539614	1.45774	-0.37017	0.711256	NA	0.977805	2.56738	0.879451	0.974075	2.09273	3.06032	Prelid3b	ENSMUSG00000016257	PRELI domain containing 3B [Source:MGI Symbol;Acc:MGI:1913640]
ENSMUST00000016463	0.325935	1.95736	4.04517	0.483876	0.628474	NA	1.95561	0	0	0	0	0	Slc25a5	ENSMUSG00000016319	solute carrier family 25 (mitochondrial carrier, adenine nucleotide translocator), member 5 [Source:MGI Symbol;Acc:MGI:1353496]
ENSMUST00000016498	12.6043	-1.10773	0.51386	-2.15569	0.0311076	0.139795	10.7559	3.85107	8.79451	21.4296	17.7882	13.0064	Srms	ENSMUSG00000027579	src-related kinase lacking C-terminal regulatory tyrosine and N-terminal myristylation sites [Source:MGI Symbol;Acc:MGI:101865]
ENSMUST00000016511	0.757404	-0.57973	2.70065	-0.214663	0.83003	NA	0	0	1.7589	0.974075	1.04637	0.765079	Ptk6	ENSMUSG00000038751	PTK6 protein tyrosine kinase 6 [Source:MGI Symbol;Acc:MGI:99683]
ENSMUST00000016553	5.43144	-0.0639224	0.75693	-0.0844495	0.932699	NA	7.82244	2.56738	5.27671	6.81852	6.27819	3.8254	Nkap	ENSMUSG00000016409	NFKB activating protein [Source:MGI Symbol;Acc:MGI:1914300]
ENSMUST00000016571	2.37206	0.365975	1.23565	0.296181	0.767092	NA	1.95561	2.56738	3.51781	3.8963	0	2.29524	Ndufa1	ENSMUSG00000016427	NADH:ubiquinone oxidoreductase subunit A1 [Source:MGI Symbol;Acc:MGI:1929511]
ENSMUST00000016640	1.32402	0.0370946	1.92062	0.0193139	0.984591	NA	1.95561	1.28369	0.879451	0	0	3.8254	Cd274	ENSMUSG00000016496	CD274 antigen [Source:MGI Symbol;Acc:MGI:1926446]
ENSMUST00000016664	27.9561	-0.290824	0.346976	-0.838167	0.401937	0.662212	21.5117	23.1064	30.7808	18.5074	35.5764	38.254	Lnx2	ENSMUSG00000016520	ligand of numb-protein X 2 [Source:MGI Symbol;Acc:MGI:2155959]
ENSMUST00000016670	154.129	-0.158974	0.145088	-1.09571	0.273205	0.543616	152.538	152.759	132.797	165.593	152.769	168.317	Dyrk3	ENSMUSG00000016526	dual-specificity tyrosine-(Y)-phosphorylation regulated kinase 3 [Source:MGI Symbol;Acc:MGI:1330300]
ENSMUST00000016672	14.0241	-0.397059	0.467808	-0.848765	0.396012	0.657377	11.7337	15.4043	9.67397	18.5074	10.4637	18.3619	Mapkapk2	ENSMUSG00000016528	MAP kinase-activated protein kinase 2 [Source:MGI Symbol;Acc:MGI:109298]
ENSMUST00000016673	2.48703	0.204735	1.21426	0.168609	0.866104	NA	5.86683	1.28369	0.879451	0.974075	2.09273	3.8254	Il10	ENSMUSG00000016529	interleukin 10 [Source:MGI Symbol;Acc:MGI:96537]
ENSMUST00000016680	0.467545	0.884442	4.0531	0.218214	0.827262	NA	0	0	1.7589	0	1.04637	0	Cul4a	ENSMUSG00000031446	cullin 4A [Source:MGI Symbol;Acc:MGI:1914487]
ENSMUST00000016771	12.0601	-0.812956	0.580024	-1.40159	0.161038	0.40395	13.6893	8.98583	3.51781	24.3519	15.6955	6.12064	Myh9	ENSMUSG00000022443	myosin, heavy polypeptide 9, non-muscle [Source:MGI Symbol;Acc:MGI:107717]
ENSMUST00000016781	4.52691	-0.72724	0.845382	-0.860251	0.389651	NA	4.88902	2.56738	2.63835	4.87037	8.37092	3.8254	Ift27	ENSMUSG00000016637	intraflagellar transport 27 [Source:MGI Symbol;Acc:MGI:1914292]
ENSMUST00000017090	5.98934	0.662479	0.794722	0.833599	0.404507	NA	0.977805	7.70214	13.1918	6.81852	4.18546	3.06032	Kctd5	ENSMUSG00000016946	potassium channel tetramerisation domain containing 5 [Source:MGI Symbol;Acc:MGI:1916509]
ENSMUST00000017126	117.578	-0.0481915	0.184204	-0.261621	0.793614	0.910061	105.603	136.071	105.534	98.3816	152.769	107.111	Pom121l2	ENSMUSG00000016982	POM121 membrane glycoprotein-like 2 (rat) [Source:MGI Symbol;Acc:MGI:2684870]
ENSMUST00000017142	0.928506	-3.28489	2.49417	-1.31703	0.187828	NA	0	0	0	1.94815	2.09273	1.53016	Svs4	ENSMUSG00000016998	seminal vesicle secretory protein 4 [Source:MGI Symbol;Acc:MGI:98450]
ENSMUST00000017144	0.290481	0.167149	4.08047	0.0409631	0.967325	NA	0.977805	0	0	0	0	0.765079	Svs6	ENSMUSG00000017000	seminal vesicle secretory protein 6 [Source:MGI Symbol;Acc:MGI:106178]
ENSMUST00000017151	0.464253	-2.28549	3.67161	-0.622477	0.533628	NA	0	0	0	0.974075	1.04637	0.765079	Rbpjl	ENSMUSG00000017007	recombination signal binding protein for immunoglobulin kappa J region-like [Source:MGI Symbol;Acc:MGI:1196616]
ENSMUST00000017153	11.8714	0.835238	0.512616	1.62936	0.103236	0.307253	18.5783	16.688	10.5534	10.7148	6.27819	8.41587	Sdc4	ENSMUSG00000017009	syndecan 4 [Source:MGI Symbol;Acc:MGI:1349164]
ENSMUST00000017193	0.29315	1.84622	4.0531	0.45551	0.648743	NA	0	0	1.7589	0	0	0	Ccdc70	ENSMUSG00000017049	coiled-coil domain containing 70 [Source:MGI Symbol;Acc:MGI:1915179]
ENSMUST00000017208	0.697577	-2.86084	3.55054	-0.805748	0.420388	NA	0	0	0	0	4.18546	0	Prl5a1	ENSMUSG00000017064	prolactin family 5, subfamily a, member 1 [Source:MGI Symbol;Acc:MGI:106332]
ENSMUST00000017288	0.685528	-2.8351	3.27186	-0.866511	0.38621	NA	0	0	0	0.974075	3.1391	0	Rnd3	ENSMUSG00000017144	Rho family GTPase 3 [Source:MGI Symbol;Acc:MGI:1921444]
ENSMUST00000017290	10.2045	-0.806553	0.553114	-1.4582	0.144784	0.379155	9.77805	5.13476	7.03561	13.637	15.6955	9.94603	Brca1	ENSMUSG00000017146	breast cancer 1, early onset [Source:MGI Symbol;Acc:MGI:104537]
ENSMUST00000017309	0.255026	-1.46206	4.06074	-0.360047	0.718812	NA	0	0	0	0	0	1.53016	Gast	ENSMUSG00000017165	gastrin [Source:MGI Symbol;Acc:MGI:104768]
ENSMUST00000017316	1.08477	-0.0738104	2.16458	-0.0340993	0.972798	NA	1.95561	1.28369	0	0.974075	0	2.29524	Aoc3	ENSMUSG00000019326	amine oxidase, copper containing 3 [Source:MGI Symbol;Acc:MGI:1306797]
ENSMUST00000017332	3.674	0.0103945	0.915095	0.0113589	0.990937	NA	4.88902	2.56738	3.51781	4.87037	3.1391	3.06032	Coa3	ENSMUSG00000017188	cytochrome C oxidase assembly factor 3 [Source:MGI Symbol;Acc:MGI:1098757]
ENSMUST00000017348	40.8005	-0.149542	0.270892	-0.552034	0.580925	0.79352	38.1344	38.5107	39.5753	49.6778	34.53	44.3746	Gsdma	ENSMUSG00000017204	gasdermin A [Source:MGI Symbol;Acc:MGI:1889509]
ENSMUST00000017365	10.5045	-0.281665	0.547808	-0.514168	0.607135	0.810516	6.84463	6.41845	14.9507	8.76667	11.51	14.5365	Psmd3	ENSMUSG00000017221	proteasome (prosome, macropain) 26S subunit, non-ATPase, 3 [Source:MGI Symbol;Acc:MGI:98858]
ENSMUST00000017384	0.507099	2.58232	3.83499	0.673359	0.500719	NA	0	1.28369	1.7589	0	0	0	Casc3	ENSMUSG00000078676	cancer susceptibility candidate 3 [Source:MGI Symbol;Acc:MGI:2179723]
ENSMUST00000017443	9.364	0.0986508	0.592373	0.166535	0.867736	0.941681	17.6005	5.13476	6.15616	9.74075	8.37092	9.18095	Dnttip1	ENSMUSG00000017299	deoxynucleotidyltransferase, terminal, interacting protein 1 [Source:MGI Symbol;Acc:MGI:1923483]
ENSMUST00000017544	3.64019	-0.621729	0.958997	-0.648311	0.516784	NA	0.977805	5.13476	2.63835	5.84445	4.18546	3.06032	Stac2	ENSMUSG00000017400	SH3 and cysteine rich domain 2 [Source:MGI Symbol;Acc:MGI:2144518]
ENSMUST00000017549	0.467545	0.884442	4.0531	0.218214	0.827262	NA	0	0	1.7589	0	1.04637	0	Nek8	ENSMUSG00000017405	NIMA (never in mitosis gene a)-related expressed kinase 8 [Source:MGI Symbol;Acc:MGI:1890646]
ENSMUST00000017552	8.79794	-0.154213	0.591243	-0.260829	0.794224	NA	9.77805	5.13476	9.67397	12.663	9.41729	6.12064	Cacnb1	ENSMUSG00000020882	calcium channel, voltage-dependent, beta 1 subunit [Source:MGI Symbol;Acc:MGI:102522]
ENSMUST00000017561	5.25289	0.918216	0.800107	1.14762	0.251127	NA	5.86683	11.5532	3.51781	3.8963	2.09273	4.59048	Plxdc1	ENSMUSG00000017417	plexin domain containing 1 [Source:MGI Symbol;Acc:MGI:1919574]
ENSMUST00000017562	6.81457	-1.29664	0.762825	-1.69978	0.0891715	NA	1.95561	2.56738	7.03561	2.92222	15.6955	10.7111	Arl5b	ENSMUSG00000017418	ADP-ribosylation factor-like 5B [Source:MGI Symbol;Acc:MGI:1923119]
ENSMUST00000017576	0.255026	-1.46206	4.06074	-0.360047	0.718812	NA	0	0	0	0	0	1.53016	Rbfox3	ENSMUSG00000025576	RNA binding protein, fox-1 homolog (C. elegans) 3 [Source:MGI Symbol;Acc:MGI:106368]
ENSMUST00000017610	22.2284	-0.530837	0.369697	-1.43587	0.151039	0.387208	12.7115	21.8227	20.2274	28.2482	25.1128	25.2476	Timp2	ENSMUSG00000017466	tissue inhibitor of metalloproteinase 2 [Source:MGI Symbol;Acc:MGI:98753]
ENSMUST00000017620	1.29604	-0.625222	1.85081	-0.33781	0.735506	NA	0	1.28369	1.7589	2.92222	1.04637	0.765079	Cant1	ENSMUSG00000025575	calcium activated nucleotidase 1 [Source:MGI Symbol;Acc:MGI:1923275]
ENSMUST00000017629	18.2659	1.27754	0.436084	2.92959	0.00339414	0.02519	18.5783	38.5107	21.1068	9.74075	9.41729	12.2413	Top2b	ENSMUSG00000017485	topoisomerase (DNA) II beta [Source:MGI Symbol;Acc:MGI:98791]
ENSMUST00000017637	3.62678	0.438932	1.04069	0.421772	0.673192	NA	0	6.41845	6.15616	5.84445	1.04637	2.29524	Igfbp4	ENSMUSG00000017493	insulin-like growth factor binding protein 4 [Source:MGI Symbol;Acc:MGI:96439]
ENSMUST00000017751	0.785223	-1.77521	2.64856	-0.670254	0.502696	NA	0	0	0.879451	0.974075	2.09273	0.765079	Tns4	ENSMUSG00000017607	tensin 4 [Source:MGI Symbol;Acc:MGI:2144377]
ENSMUST00000017783	28.4664	0.0970945	0.375787	0.258377	0.796116	0.910141	44.979	21.8227	21.1068	15.5852	39.7619	27.5429	Rab11fip4	ENSMUSG00000017639	RAB11 family interacting protein 4 (class II) [Source:MGI Symbol;Acc:MGI:2442920]
ENSMUST00000017799	0.274088	0.167149	4.08047	0.0409631	0.967325	NA	0	0	0.879451	0	0	0.765079	Cd40	ENSMUSG00000017652	CD40 antigen [Source:MGI Symbol;Acc:MGI:88336]
ENSMUST00000017836	1.00367	0.505858	2.42805	0.20834	0.834964	NA	0	0	3.51781	0.974075	0	1.53016	Rhbdl3	ENSMUSG00000017692	rhomboid like 3 [Source:MGI Symbol;Acc:MGI:2179276]
ENSMUST00000017839	1.73286	0.223653	1.73134	0.129179	0.897216	NA	1.95561	3.85107	0	0	0	4.59048	Rnf135	ENSMUSG00000020707	ring finger protein 135 [Source:MGI Symbol;Acc:MGI:1919206]
ENSMUST00000017841	16.9818	0.488671	0.419198	1.16573	0.243724	0.509553	19.5561	21.8227	18.4685	16.5593	9.41729	16.0667	Ada	ENSMUSG00000017697	adenosine deaminase [Source:MGI Symbol;Acc:MGI:87916]
ENSMUST00000017851	196.017	0.568411	0.132148	4.30131	1.69793e-05	0.000255703	220.984	252.887	228.657	158.774	166.372	148.425	Serinc3	ENSMUSG00000017707	serine incorporator 3 [Source:MGI Symbol;Acc:MGI:1349457]
ENSMUST00000017864	144.378	0.447201	0.156247	2.86213	0.00420799	0.0300215	143.737	193.837	162.699	122.733	130.796	112.467	Trp53tg5	ENSMUSG00000017720	transformation related protein 53 target 5 [Source:MGI Symbol;Acc:MGI:1920853]
ENSMUST00000017881	2.74373	-0.520139	1.14369	-0.454789	0.649261	NA	4.88902	0	1.7589	3.8963	2.09273	3.8254	Mmp9	ENSMUSG00000017737	matrix metallopeptidase 9 [Source:MGI Symbol;Acc:MGI:97011]
ENSMUST00000017891	5.46063	0.246218	0.775501	0.317496	0.750868	NA	3.91122	3.85107	9.67397	3.8963	8.37092	3.06032	Ghdc	ENSMUSG00000017747	GH3 domain containing [Source:MGI Symbol;Acc:MGI:1931556]
ENSMUST00000017908	87.3638	0.618166	0.189891	3.25537	0.00113246	0.0102772	95.8249	109.114	112.57	59.4186	75.3383	71.9175	Zswim1	ENSMUSG00000017764	zinc finger SWIM-type containing 1 [Source:MGI Symbol;Acc:MGI:1919221]
ENSMUST00000017911	49.4409	0.112239	0.246626	0.455096	0.64904	0.835418	60.6239	48.7802	44.852	44.8074	47.0864	50.4952	Spata25	ENSMUSG00000017767	spermatogenesis associated 25 [Source:MGI Symbol;Acc:MGI:1922892]
ENSMUST00000017974	5.95265	-0.505299	0.734755	-0.687711	0.491635	NA	2.93341	7.70214	4.39726	3.8963	8.37092	8.41587	Dhx58	ENSMUSG00000017830	DEXH (Asp-Glu-X-His) box polypeptide 58 [Source:MGI Symbol;Acc:MGI:1931560]
ENSMUST00000017975	103.192	0.426693	0.177721	2.40091	0.0163542	0.0882722	126.137	114.248	113.449	93.5112	98.3583	73.4476	Rab5a	ENSMUSG00000017831	RAB5A, member RAS oncogene family [Source:MGI Symbol;Acc:MGI:105926]
ENSMUST00000017981	29.373	-0.315791	0.327431	-0.964452	0.33482	0.60551	33.2454	20.539	24.6246	25.3259	33.4837	39.0191	Nkiras2	ENSMUSG00000017837	NFKB inhibitor interacting Ras-like protein 2 [Source:MGI Symbol;Acc:MGI:1919216]
ENSMUST00000018002	22.7525	-0.389727	0.363385	-1.07249	0.2835	0.555581	16.6227	16.688	25.5041	25.3259	24.0664	28.3079	Ift52	ENSMUSG00000017858	intraflagellar transport 52 [Source:MGI Symbol;Acc:MGI:2387217]
ENSMUST00000018005	3.52582	-0.438367	0.994493	-0.440794	0.659362	NA	0.977805	2.56738	5.27671	1.94815	7.32456	3.06032	Mybl2	ENSMUSG00000017861	myeloblastosis oncogene-like 2 [Source:MGI Symbol;Acc:MGI:101785]
ENSMUST00000018113	1.17357	-1.19215	2.01964	-0.590278	0.555005	NA	0	1.28369	0.879451	0.974075	3.1391	0.765079	Ptgis	ENSMUSG00000017969	prostaglandin I2 (prostacyclin) synthase [Source:MGI Symbol;Acc:MGI:1097156]
ENSMUST00000018143	4.59217	-0.300334	0.858022	-0.350031	0.726316	NA	5.86683	0	6.15616	3.8963	6.27819	5.35556	Ddx27	ENSMUSG00000017999	DEAD (Asp-Glu-Ala-Asp) box polypeptide 27 [Source:MGI Symbol;Acc:MGI:2385884]
ENSMUST00000018184	107.397	-0.43349	0.172132	-2.51836	0.0117903	0.0691237	95.8249	98.8441	80.0301	120.785	131.842	117.057	Rrp7a	ENSMUSG00000018040	ribosomal RNA processing 7 homolog A (S. cerevisiae) [Source:MGI Symbol;Acc:MGI:1922028]
ENSMUST00000018186	2.14858	-0.0287737	1.3978	-0.0205851	0.983577	NA	1.95561	0	4.39726	1.94815	0	4.59048	Cyb5r3	ENSMUSG00000018042	cytochrome b5 reductase 3 [Source:MGI Symbol;Acc:MGI:94893]
ENSMUST00000018212	2.34759	0.9443	1.33764	0.705947	0.480221	NA	2.93341	6.41845	0	2.92222	1.04637	0.765079	Ints2	ENSMUSG00000018068	integrator complex subunit 2 [Source:MGI Symbol;Acc:MGI:1917672]
ENSMUST00000018246	6.17695	1.22811	0.748249	1.64131	0.100733	NA	4.88902	7.70214	13.1918	5.84445	3.1391	2.29524	Hist1h2bc	ENSMUSG00000018102	histone cluster 1, H2bc [Source:MGI Symbol;Acc:MGI:1915274]
ENSMUST00000018287	4.61074	-0.00786858	0.816157	-0.009641	0.992308	NA	4.88902	6.41845	2.63835	3.8963	5.23183	4.59048	Mafk	ENSMUSG00000018143	v-maf musculoaponeurotic fibrosarcoma oncogene family, protein K (avian) [Source:MGI Symbol;Acc:MGI:99951]
ENSMUST00000018304	0.452205	-2.25201	3.99662	-0.563479	0.573109	NA	0	0	0	1.94815	0	0.765079	Med1	ENSMUSG00000018160	mediator complex subunit 1 [Source:MGI Symbol;Acc:MGI:1100846]
ENSMUST00000018313	0.388342	0.167149	4.08047	0.0409631	0.967325	NA	0	1.28369	0	0	1.04637	0	Mfng	ENSMUSG00000018169	MFNG O-fucosylpeptide 3-beta-N-acetylglucosaminyltransferase [Source:MGI Symbol;Acc:MGI:1095404]
ENSMUST00000018315	2.45298	-0.65323	1.29087	-0.506038	0.61283	NA	0	5.13476	0.879451	0.974075	3.1391	4.59048	Vmp1	ENSMUSG00000018171	vacuole membrane protein 1 [Source:MGI Symbol;Acc:MGI:1923159]
ENSMUST00000018337	4.48546	-1.93059	0.98706	-1.9559	0.0504775	NA	0	5.13476	0.879451	5.84445	10.4637	4.59048	Cdc73	ENSMUSG00000026361	cell division cycle 73, Paf1/RNA polymerase II complex component [Source:MGI Symbol;Acc:MGI:2384876]
ENSMUST00000018343	0.522869	1.11235	3.5324	0.3149	0.752838	NA	0	1.28369	0.879451	0.974075	0	0	Ro60	ENSMUSG00000018199	Ro60, Y RNA binding protein [Source:MGI Symbol;Acc:MGI:106652]
ENSMUST00000018353	0.753832	3.13828	3.08336	1.01781	0.308768	NA	1.95561	2.56738	0	0	0	0	Stk4	ENSMUSG00000018209	serine/threonine kinase 4 [Source:MGI Symbol;Acc:MGI:1929004]
ENSMUST00000018382	10.0319	-0.207035	0.554347	-0.373476	0.708794	0.868	11.7337	6.41845	9.67397	14.6111	6.27819	11.4762	Gdf9	ENSMUSG00000018238	growth differentiation factor 9 [Source:MGI Symbol;Acc:MGI:95692]
ENSMUST00000018383	2.55795	-0.809916	1.30767	-0.61936	0.535679	NA	1.95561	3.85107	0	0	4.18546	5.35556	Zcchc10	ENSMUSG00000018239	zinc finger, CCHC domain containing 10 [Source:MGI Symbol;Acc:MGI:1196228]
ENSMUST00000018407	5.92879	0.290007	0.804624	0.360425	0.718529	NA	13.6893	5.13476	0.879451	5.84445	3.1391	6.88572	Tbx5	ENSMUSG00000018263	T-box 5 [Source:MGI Symbol;Acc:MGI:102541]
ENSMUST00000018431	0.255026	-1.46206	4.06074	-0.360047	0.718812	NA	0	0	0	0	0	1.53016	Spag7	ENSMUSG00000018287	sperm associated antigen 7 [Source:MGI Symbol;Acc:MGI:107380]
ENSMUST00000018470	11.0057	0.53943	0.53433	1.00954	0.312714	0.583766	19.5561	8.98583	10.5534	10.7148	6.27819	9.94603	Ywhab	ENSMUSG00000018326	tyrosine 3-monooxygenase/tryptophan 5-monooxygenase activation protein, beta polypeptide [Source:MGI Symbol;Acc:MGI:1891917]
ENSMUST00000018491	0.626599	-2.71653	3.1431	-0.864285	0.387432	NA	0	0	0	1.94815	1.04637	0.765079	Zkscan6	ENSMUSG00000018347	zinc finger with KRAB and SCAN domains 6 [Source:MGI Symbol;Acc:MGI:1289293]
ENSMUST00000018521	2.87286	0.220908	1.1119	0.198677	0.842516	NA	2.93341	0	6.15616	1.94815	3.1391	3.06032	Vezf1	ENSMUSG00000018377	vascular endothelial zinc finger 1 [Source:MGI Symbol;Acc:MGI:1313291]
ENSMUST00000018549	1.26497	0.571213	1.98195	0.288208	0.773187	NA	1.95561	2.56738	0	0.974075	2.09273	0	Mrm1	ENSMUSG00000018405	mitochondrial rRNA methyltransferase 1 [Source:MGI Symbol;Acc:MGI:2443470]
ENSMUST00000018556	1.65309	0.612677	1.55927	0.392924	0.694375	NA	1.95561	1.28369	2.63835	1.94815	2.09273	0	Kansl1	ENSMUSG00000018412	KAT8 regulatory NSL complex subunit 1 [Source:MGI Symbol;Acc:MGI:1923969]
ENSMUST00000018568	9.40486	0.224985	0.565662	0.397738	0.690824	0.859805	9.77805	12.8369	7.91506	11.6889	7.32456	6.88572	Drg2	ENSMUSG00000020537	developmentally regulated GTP binding protein 2 [Source:MGI Symbol;Acc:MGI:1342307]
ENSMUST00000018569	77.1585	-0.747537	0.208687	-3.5821	0.000340844	0.00364017	54.7571	56.4824	60.6822	97.4075	114.054	79.5683	Dhx40	ENSMUSG00000018425	DEAH (Asp-Glu-Ala-His) box polypeptide 40 [Source:MGI Symbol;Acc:MGI:1914737]
ENSMUST00000018571	2.1822	0.122618	1.2393	0.0989413	0.921185	NA	1.95561	1.28369	3.51781	1.94815	2.09273	2.29524	Ypel2	ENSMUSG00000018427	yippee like 2 [Source:MGI Symbol;Acc:MGI:1925114]
ENSMUST00000018572	0.669445	1.62051	3.09738	0.523188	0.600843	NA	0	1.28369	1.7589	0.974075	0	0	Akap1	ENSMUSG00000018428	A kinase (PRKA) anchor protein 1 [Source:MGI Symbol;Acc:MGI:104729]
ENSMUST00000018610	0.92118	-1.95007	2.57945	-0.756005	0.449646	NA	0	1.28369	0	1.94815	0	2.29524	Nos2	ENSMUSG00000020826	nitric oxide synthase 2, inducible [Source:MGI Symbol;Acc:MGI:97361]
ENSMUST00000018614	1.65352	-1.06424	1.64046	-0.648741	0.516506	NA	1.95561	1.28369	0	4.87037	1.04637	0.765079	Kcnab3	ENSMUSG00000018470	potassium voltage-gated channel, shaker-related subfamily, beta member 3 [Source:MGI Symbol;Acc:MGI:1336208]
ENSMUST00000018625	164.03	0.275532	0.148618	1.85396	0.0637448	0.227394	174.049	188.702	175.89	176.308	139.167	130.064	Appbp2	ENSMUSG00000018481	amyloid beta precursor protein (cytoplasmic tail) binding protein 2 [Source:MGI Symbol;Acc:MGI:1914134]
ENSMUST00000018630	0.464253	-2.28549	3.67161	-0.622477	0.533628	NA	0	0	0	0.974075	1.04637	0.765079	Wnt9b	ENSMUSG00000018486	wingless-type MMTV integration site family, member 9B [Source:MGI Symbol;Acc:MGI:1197020]
ENSMUST00000018644	4.03187	-1.08282	0.970537	-1.11569	0.264554	NA	0	6.41845	1.7589	3.8963	5.23183	6.88572	Adora2b	ENSMUSG00000018500	adenosine A2b receptor [Source:MGI Symbol;Acc:MGI:99403]
ENSMUST00000018653	1.06699	-3.50906	2.53733	-1.38297	0.166673	NA	0	0	0	0	1.04637	5.35556	Cenpv	ENSMUSG00000018509	centromere protein V [Source:MGI Symbol;Acc:MGI:1920389]
ENSMUST00000018681	3.857	0.381597	0.974904	0.39142	0.695487	NA	6.84463	3.85107	2.63835	2.92222	0	6.88572	Pcgf2	ENSMUSG00000018537	polycomb group ring finger 2 [Source:MGI Symbol;Acc:MGI:99161]
ENSMUST00000018685	2.03835	-1.65453	1.48262	-1.11595	0.264445	NA	1.95561	0	0.879451	6.81852	1.04637	1.53016	Cwc25	ENSMUSG00000018541	CWC25 spliceosome-associated protein [Source:MGI Symbol;Acc:MGI:1914730]
ENSMUST00000018691	3.80444	-1.09797	0.96772	-1.13459	0.256546	NA	0	3.85107	3.51781	4.87037	5.23183	5.35556	Pip4k2b	ENSMUSG00000018547	phosphatidylinositol-5-phosphate 4-kinase, type II, beta [Source:MGI Symbol;Acc:MGI:1934234]
ENSMUST00000018698	81.8587	0.95939	0.199985	4.79732	1.60802e-06	2.84489e-05	94.8471	120.667	109.931	50.6519	52.3183	62.7365	Ybx2	ENSMUSG00000018554	Y box protein 2 [Source:MGI Symbol;Acc:MGI:1096372]
ENSMUST00000018711	18.788	-0.638819	0.395176	-1.61654	0.105977	0.312488	14.6671	15.4043	14.0712	23.3778	23.02	22.1873	Gabarap	ENSMUSG00000018567	gamma-aminobutyric acid receptor associated protein [Source:MGI Symbol;Acc:MGI:1861742]
ENSMUST00000018716	0.717756	0.479579	3.01022	0.159317	0.873419	NA	0	2.56738	0	0.974075	0	0.765079	Phf23	ENSMUSG00000018572	PHD finger protein 23 [Source:MGI Symbol;Acc:MGI:1925496]
ENSMUST00000018727	31.2545	-0.695838	0.316987	-2.19517	0.0281517	0.130703	25.4229	23.1064	22.8657	48.7037	34.53	32.8984	G3bp1	ENSMUSG00000018583	GTPase activating protein (SH3 domain) binding protein 1 [Source:MGI Symbol;Acc:MGI:1351465]
ENSMUST00000018739	1.0962	-1.00973	2.07562	-0.486473	0.626632	NA	0.977805	1.28369	0	0.974075	1.04637	2.29524	Glra4	ENSMUSG00000018595	glycine receptor, alpha 4 subunit [Source:MGI Symbol;Acc:MGI:95750]
ENSMUST00000018743	3.41599	0.591848	1.02904	0.575148	0.565191	NA	5.86683	3.85107	2.63835	5.84445	0	2.29524	Mief2	ENSMUSG00000018599	mitochondrial elongation factor 2 [Source:MGI Symbol;Acc:MGI:2144199]
ENSMUST00000018744	10.7821	-0.442035	0.53003	-0.83398	0.404292	0.663949	10.7559	8.98583	7.91506	9.74075	10.4637	16.8317	Shmt1	ENSMUSG00000020534	serine hydroxymethyltransferase 1 (soluble) [Source:MGI Symbol;Acc:MGI:98299]
ENSMUST00000018765	0.309543	1.89901	4.04988	0.468904	0.639138	NA	0.977805	0	0.879451	0	0	0	Mmp8	ENSMUSG00000005800	matrix metallopeptidase 8 [Source:MGI Symbol;Acc:MGI:1202395]
ENSMUST00000018767	0.29315	1.84622	4.0531	0.45551	0.648743	NA	0	0	1.7589	0	0	0	Mmp7	ENSMUSG00000018623	matrix metallopeptidase 7 [Source:MGI Symbol;Acc:MGI:103189]
ENSMUST00000018795	1.61391	0.626616	1.61888	0.387068	0.698706	NA	0.977805	1.28369	3.51781	0	3.1391	0.765079	Tada2a	ENSMUSG00000018651	transcriptional adaptor 2A [Source:MGI Symbol;Acc:MGI:2144471]
ENSMUST00000018800	0.602291	1.32914	3.57349	0.371946	0.709933	NA	0	2.56738	0	0	1.04637	0	Myl4	ENSMUSG00000061086	myosin, light polypeptide 4 [Source:MGI Symbol;Acc:MGI:97267]
ENSMUST00000018805	727.853	0.290102	0.0864954	3.35396	0.000796643	0.00765608	822.334	754.81	821.408	651.656	709.435	607.473	Cog1	ENSMUSG00000018661	component of oligomeric golgi complex 1 [Source:MGI Symbol;Acc:MGI:1333873]
ENSMUST00000018810	2.2027	0.209865	1.23552	0.16986	0.86512	NA	1.95561	2.56738	2.63835	1.94815	1.04637	3.06032	Cbx1	ENSMUSG00000018666	chromobox 1 [Source:MGI Symbol;Acc:MGI:105369]
ENSMUST00000018842	4.10134	0.818125	0.930784	0.878963	0.379421	NA	2.93341	7.70214	5.27671	4.87037	0	3.8254	Lhx1	ENSMUSG00000018698	LIM homeobox protein 1 [Source:MGI Symbol;Acc:MGI:99783]
ENSMUST00000018851	1702.27	-0.190581	0.0660968	-2.88337	0.00393447	0.0283298	1548.84	1605.9	1617.31	1765.02	1771.5	1905.05	Dync1h1	ENSMUSG00000018707	dynein cytoplasmic 1 heavy chain 1 [Source:MGI Symbol;Acc:MGI:103147]
ENSMUST00000018871	2.89894	0.95627	1.11048	0.861128	0.389167	NA	5.86683	1.28369	4.39726	0.974075	1.04637	3.8254	Cpsf4l	ENSMUSG00000018727	cleavage and polyadenylation specific factor 4-like [Source:MGI Symbol;Acc:MGI:1277182]
ENSMUST00000018875	94.1278	-0.471569	0.193034	-2.44293	0.0145684	0.0812629	85.069	75.7377	76.5123	88.6408	105.683	133.124	Ap2b1	ENSMUSG00000035152	adaptor-related protein complex 2, beta 1 subunit [Source:MGI Symbol;Acc:MGI:1919020]
ENSMUST00000018880	4.1387	-0.518445	0.890915	-0.581924	0.560618	NA	1.95561	3.85107	4.39726	1.94815	7.32456	5.35556	Ndel1	ENSMUSG00000018736	nudE neurodevelopment protein 1 like 1 [Source:MGI Symbol;Acc:MGI:1932915]
ENSMUST00000018884	5081.68	0.585971	0.0554996	10.5581	4.65981e-26	3.93333e-24	6006.66	5930.65	6358.43	4087.22	4108.03	3999.07	Slc25a35	ENSMUSG00000018740	solute carrier family 25, member 35 [Source:MGI Symbol;Acc:MGI:1919248]
ENSMUST00000018909	7.47442	-0.67616	0.694903	-0.973029	0.330539	NA	1.95561	11.5532	4.39726	5.84445	7.32456	13.7714	Fxr2	ENSMUSG00000018765	fragile X mental retardation, autosomal homolog 2 [Source:MGI Symbol;Acc:MGI:1346074]
ENSMUST00000018918	0.348788	-1.85356	4.02474	-0.460542	0.645127	NA	0	0	0	0	2.09273	0	Cd68	ENSMUSG00000018774	CD68 antigen [Source:MGI Symbol;Acc:MGI:88342]
ENSMUST00000018965	7.40604	-0.267458	0.706978	-0.378311	0.705199	NA	6.84463	1.28369	11.4329	4.87037	14.6491	5.35556	Avpi1	ENSMUSG00000018821	arginine vasopressin-induced 1 [Source:MGI Symbol;Acc:MGI:1916784]
ENSMUST00000018966	5.84193	-0.223452	0.719135	-0.310723	0.756011	NA	4.88902	5.13476	6.15616	3.8963	7.32456	7.65079	Sfrp5	ENSMUSG00000018822	secreted frizzled-related sequence protein 5 [Source:MGI Symbol;Acc:MGI:1860298]
ENSMUST00000018988	222.856	0.865109	0.135643	6.37785	1.7959e-10	5.1992e-09	295.297	308.086	260.318	186.048	141.259	146.13	Fndc8	ENSMUSG00000018844	fibronectin type III domain containing 8 [Source:MGI Symbol;Acc:MGI:1926169]
ENSMUST00000018990	14.1374	-0.525413	0.463142	-1.13445	0.256605	0.525088	11.7337	12.8369	10.5534	17.5333	11.51	20.6571	Pank3	ENSMUSG00000018846	pantothenate kinase 3 [Source:MGI Symbol;Acc:MGI:2387464]
ENSMUST00000018992	3.08721	-0.518905	1.04853	-0.494888	0.620679	NA	0.977805	5.13476	1.7589	2.92222	3.1391	4.59048	Rars	ENSMUSG00000018848	arginyl-tRNA synthetase [Source:MGI Symbol;Acc:MGI:1914297]
ENSMUST00000018993	7.43059	1.04486	0.644446	1.62133	0.104948	NA	10.7559	7.70214	11.4329	4.87037	5.23183	4.59048	Wwc1	ENSMUSG00000018849	WW, C2 and coiled-coil domain containing 1 [Source:MGI Symbol;Acc:MGI:2388637]
ENSMUST00000019026	6.04221	0.47365	0.732524	0.6466	0.517891	NA	9.77805	7.70214	3.51781	4.87037	7.32456	3.06032	Mrpl45	ENSMUSG00000018882	mitochondrial ribosomal protein L45 [Source:MGI Symbol;Acc:MGI:1914286]
ENSMUST00000019044	5.30776	0.0292374	0.770348	0.0379535	0.969725	NA	2.93341	8.98583	4.39726	3.8963	6.27819	5.35556	Slc22a5	ENSMUSG00000018900	solute carrier family 22 (organic cation transporter), member 5 [Source:MGI Symbol;Acc:MGI:1329012]
ENSMUST00000019058	12.6586	-1.14018	0.506595	-2.25067	0.0244064	0.117682	5.86683	8.98583	8.79451	16.5593	21.9737	13.7714	Il3	ENSMUSG00000018914	interleukin 3 [Source:MGI Symbol;Acc:MGI:96552]
ENSMUST00000019060	10.4631	-0.158581	0.547365	-0.289717	0.772033	0.899678	7.82244	11.5532	10.5534	14.6111	5.23183	13.0064	Csf2	ENSMUSG00000018916	colony stimulating factor 2 (granulocyte-macrophage) [Source:MGI Symbol;Acc:MGI:1339752]
ENSMUST00000019063	0.488281	0.996031	3.97018	0.250878	0.801909	NA	1.95561	0	0	0.974075	0	0	Tm4sf5	ENSMUSG00000018919	transmembrane 4 superfamily member 5 [Source:MGI Symbol;Acc:MGI:1922854]
ENSMUST00000019064	713.021	0.34212	0.100984	3.38785	0.000704416	0.00687345	916.203	771.498	705.32	580.549	623.634	680.921	Cxcl16	ENSMUSG00000018920	chemokine (C-X-C motif) ligand 16 [Source:MGI Symbol;Acc:MGI:1932682]
ENSMUST00000019065	68.1794	0.049149	0.382185	0.1286	0.897674	0.956319	50.8459	97.5604	60.6822	62.3408	48.1328	89.5143	Pelp1	ENSMUSG00000018921	proline, glutamic acid and leucine rich protein 1 [Source:MGI Symbol;Acc:MGI:1922523]
ENSMUST00000019067	0.376916	2.13682	4.02927	0.530323	0.595888	NA	0.977805	1.28369	0	0	0	0	Med11	ENSMUSG00000018923	mediator complex subunit 11 [Source:MGI Symbol;Acc:MGI:1913422]
ENSMUST00000019068	2.46973	1.50694	1.2619	1.19419	0.232405	NA	2.93341	2.56738	5.27671	1.94815	2.09273	0	Alox15	ENSMUSG00000018924	arachidonate 15-lipoxygenase [Source:MGI Symbol;Acc:MGI:87997]
ENSMUST00000019069	41.3466	0.188597	0.285833	0.659816	0.509372	0.744975	37.1566	48.7802	46.6109	24.3519	46.0401	45.1397	Heatr9	ENSMUSG00000018925	HEAT repeat containing 9 [Source:MGI Symbol;Acc:MGI:3650286]
ENSMUST00000019074	0.464253	-2.28549	3.67161	-0.622477	0.533628	NA	0	0	0	0.974075	1.04637	0.765079	Ccl4	ENSMUSG00000018930	chemokine (C-C motif) ligand 4 [Source:MGI Symbol;Acc:MGI:98261]
ENSMUST00000019075	19.4013	-0.323034	0.404501	-0.798598	0.424523	0.682115	24.4451	8.98583	17.589	21.4296	24.0664	19.8921	Natd1	ENSMUSG00000018931	N-acetyltransferase domain containing 1 [Source:MGI Symbol;Acc:MGI:1344388]
ENSMUST00000019109	5.42297	-0.331496	0.797409	-0.415716	0.677618	NA	3.91122	6.41845	4.39726	6.81852	1.04637	9.94603	Ywhah	ENSMUSG00000018965	tyrosine 3-monooxygenase/tryptophan 5-monooxygenase activation protein, eta polypeptide [Source:MGI Symbol;Acc:MGI:109194]
ENSMUST00000019118	13.2394	0.491691	0.523721	0.938842	0.347812	0.616696	10.7559	10.2695	24.6246	11.6889	16.7418	5.35556	Sart3	ENSMUSG00000018974	squamous cell carcinoma antigen recognized by T cells 3 [Source:MGI Symbol;Acc:MGI:1858230]
ENSMUST00000019143	5.892	-0.00662929	0.728677	-0.00909772	0.992741	NA	4.88902	3.85107	8.79451	7.7926	3.1391	6.88572	Slc35b4	ENSMUSG00000018999	solute carrier family 35, member B4 [Source:MGI Symbol;Acc:MGI:1931249]
ENSMUST00000019199	4.91922	-0.752558	0.835506	-0.900722	0.367736	NA	1.95561	7.70214	1.7589	7.7926	4.18546	6.12064	Plod1	ENSMUSG00000019055	procollagen-lysine, 2-oxoglutarate 5-dioxygenase 1 [Source:MGI Symbol;Acc:MGI:99907]
ENSMUST00000019224	29.9824	-0.234238	0.335629	-0.69791	0.485234	0.728266	32.2676	32.0922	18.4685	40.9111	32.4373	23.7175	Mfsd3	ENSMUSG00000019080	major facilitator superfamily domain containing 3 [Source:MGI Symbol;Acc:MGI:1916822]
ENSMUST00000019266	0.436434	-0.657657	3.84202	-0.171175	0.864086	NA	0	0	0.879451	0.974075	0	0.765079	Ccl9	ENSMUSG00000019122	chemokine (C-C motif) ligand 9 [Source:MGI Symbol;Acc:MGI:104533]
ENSMUST00000019268	2.79796	1.8276	1.19098	1.53453	0.124899	NA	7.82244	2.56738	2.63835	1.94815	1.04637	0.765079	Scrn1	ENSMUSG00000019124	secernin 1 [Source:MGI Symbol;Acc:MGI:1917188]
ENSMUST00000019276	94.623	-0.0829904	0.182047	-0.455873	0.648482	0.835418	96.8027	86.0072	93.2219	99.3556	83.7092	108.641	BC005537	ENSMUSG00000019132	cDNA sequence BC005537 [Source:MGI Symbol;Acc:MGI:2441726]
ENSMUST00000019290	3.11148	0.0566396	1.03536	0.0547052	0.956373	NA	4.88902	3.85107	0.879451	3.8963	2.09273	3.06032	Cacng2	ENSMUSG00000019146	calcium channel, voltage-dependent, gamma subunit 2 [Source:MGI Symbol;Acc:MGI:1316660]
ENSMUST00000019333	2.17832	-0.0668256	1.28292	-0.0520886	0.958458	NA	2.93341	2.56738	0.879451	0.974075	4.18546	1.53016	Rnf145	ENSMUSG00000019189	ring finger protein 145 [Source:MGI Symbol;Acc:MGI:1921565]
ENSMUST00000019386	3.46685	0.818361	0.966495	0.846731	0.397145	NA	4.88902	3.85107	4.39726	1.94815	4.18546	1.53016	Ripk4	ENSMUSG00000005251	receptor-interacting serine-threonine kinase 4 [Source:MGI Symbol;Acc:MGI:1919638]
ENSMUST00000019422	3.12939	-0.839936	1.06497	-0.788692	0.430292	NA	2.93341	0	3.51781	5.84445	4.18546	2.29524	Dpep1	ENSMUSG00000019278	dipeptidase 1 [Source:MGI Symbol;Acc:MGI:94917]
ENSMUST00000019439	17.5738	-0.543277	0.435842	-1.2465	0.212581	0.472957	6.84463	21.8227	14.9507	18.5074	18.8346	24.4825	Tmem129	ENSMUSG00000019295	transmembrane protein 129 [Source:MGI Symbol;Acc:MGI:1915616]
ENSMUST00000019441	204.634	0.286704	0.136402	2.1019	0.0355618	0.153889	247.385	237.483	191.72	181.178	172.65	197.391	Nop9	ENSMUSG00000019297	NOP9 nucleolar protein [Source:MGI Symbol;Acc:MGI:1915092]
ENSMUST00000019445	0.995071	-1.06055	2.3454	-0.452186	0.651135	NA	0.977805	0	0.879451	0.974075	3.1391	0	Hsd17b1	ENSMUSG00000019301	hydroxysteroid (17-beta) dehydrogenase 1 [Source:MGI Symbol;Acc:MGI:105077]
ENSMUST00000019447	4.07332	-0.00785677	0.936848	-0.00838638	0.993309	NA	6.84463	2.56738	2.63835	8.76667	2.09273	1.53016	Psmc3ip	ENSMUSG00000019303	proteasome (prosome, macropain) 26S subunit, ATPase 3, interacting protein [Source:MGI Symbol;Acc:MGI:1098610]
ENSMUST00000019456	0.436434	-0.657657	3.84202	-0.171175	0.864086	NA	0	0	0.879451	0.974075	0	0.765079	Grb7	ENSMUSG00000019312	growth factor receptor bound protein 7 [Source:MGI Symbol;Acc:MGI:102683]
ENSMUST00000019464	44.4249	0.49968	0.267933	1.86494	0.0621893	0.224321	42.0456	48.7802	65.0794	32.1445	38.7155	39.7841	Noxo1	ENSMUSG00000019320	NADPH oxidase organizer 1 [Source:MGI Symbol;Acc:MGI:1919143]
ENSMUST00000019470	10.5215	-0.565943	0.531398	-1.06501	0.286872	0.558718	7.82244	8.98583	8.79451	10.7148	11.51	15.3016	Psme3	ENSMUSG00000078652	proteaseome (prosome, macropain) activator subunit 3 (PA28 gamma, Ki) [Source:MGI Symbol;Acc:MGI:1096366]
ENSMUST00000019506	33.3827	0.420734	0.305285	1.37817	0.16815	0.414227	37.1566	33.3759	43.9726	20.4556	32.4373	32.8984	D8Ertd738e	ENSMUSG00000019362	DNA segment, Chr 8, ERATO Doi 738, expressed [Source:MGI Symbol;Acc:MGI:1289231]
ENSMUST00000019514	9.89485	-0.0663732	0.582483	-0.113949	0.909278	0.96099	4.88902	16.688	7.91506	5.84445	12.5564	11.4762	Calm3	ENSMUSG00000019370	calmodulin 3 [Source:MGI Symbol;Acc:MGI:103249]
ENSMUST00000019517	0.337362	0.167149	4.08047	0.0409631	0.967325	NA	0.977805	0	0	0	1.04637	0	Cops3	ENSMUSG00000019373	COP9 signalosome subunit 3 [Source:MGI Symbol;Acc:MGI:1349409]
ENSMUST00000019576	1.90308	0.570634	1.45127	0.393196	0.694175	NA	1.95561	1.28369	3.51781	3.8963	0	0.765079	Ddx39	ENSMUSG00000005481	DEAD (Asp-Glu-Ala-Asp) box polypeptide 39 [Source:MGI Symbol;Acc:MGI:1915528]
ENSMUST00000019577	5.12554	-0.0697547	0.775633	-0.0899325	0.928341	NA	6.84463	3.85107	4.39726	4.87037	3.1391	7.65079	Gipc1	ENSMUSG00000019433	GIPC PDZ domain containing family, member 1 [Source:MGI Symbol;Acc:MGI:1926252]
ENSMUST00000019608	15.073	-0.386942	0.450985	-0.857992	0.390897	0.653283	15.6449	12.8369	10.5534	14.6111	23.02	13.7714	Ptger1	ENSMUSG00000019464	prostaglandin E receptor 1 (subtype EP1) [Source:MGI Symbol;Acc:MGI:97793]
ENSMUST00000019615	27.7753	0.0360567	0.355224	0.101504	0.91915	0.96271	20.5339	39.7944	24.6246	17.5333	36.6228	27.5429	Cdc37	ENSMUSG00000019471	cell division cycle 37 [Source:MGI Symbol;Acc:MGI:109531]
ENSMUST00000019616	9.88188	0.0352455	0.552497	0.0637932	0.949135	0.977575	13.6893	10.2695	6.15616	8.76667	10.4637	9.94603	Icam5	ENSMUSG00000032174	intercellular adhesion molecule 5, telencephalin [Source:MGI Symbol;Acc:MGI:109430]
ENSMUST00000019625	0.586301	2.8114	3.89763	0.72131	0.470719	NA	0	0	3.51781	0	0	0	Myh8	ENSMUSG00000055775	myosin, heavy polypeptide 8, skeletal muscle, perinatal [Source:MGI Symbol;Acc:MGI:1339712]
ENSMUST00000019638	185.432	0.437035	0.15309	2.85476	0.00430696	0.030572	244.451	213.093	181.167	168.515	176.836	128.533	Cops6	ENSMUSG00000019494	COP9 signalosome subunit 6 [Source:MGI Symbol;Acc:MGI:1349439]
ENSMUST00000019649	912.796	0.3377	0.0761898	4.43235	9.32108e-06	0.000146093	1043.32	1034.65	979.709	839.652	795.237	784.206	Ubb	ENSMUSG00000019505	ubiquitin B [Source:MGI Symbol;Acc:MGI:98888]
ENSMUST00000019662	349.006	0.746754	0.103781	7.19551	6.22265e-13	2.29452e-11	451.746	439.022	421.257	262.026	263.684	256.302	Ap4m1	ENSMUSG00000019518	adaptor-related protein complex AP-4, mu 1 [Source:MGI Symbol;Acc:MGI:1337063]
ENSMUST00000019701	1.44238	0.213083	1.95663	0.108903	0.91328	NA	0.977805	3.85107	0	0	0	3.8254	Dusp9	ENSMUSG00000031383	dual specificity phosphatase 9 [Source:MGI Symbol;Acc:MGI:2387107]
ENSMUST00000019721	1.20641	1.75019	2.10341	0.832072	0.405368	NA	0.977805	3.85107	0.879451	0	0	1.53016	Pdk4	ENSMUSG00000019577	pyruvate dehydrogenase kinase, isoenzyme 4 [Source:MGI Symbol;Acc:MGI:1351481]
ENSMUST00000019722	767.988	0.916266	0.0889495	10.301	6.97481e-25	5.49051e-23	980.738	953.782	1076.45	582.497	486.56	527.905	Ubxn6	ENSMUSG00000019578	UBX domain protein 6 [Source:MGI Symbol;Acc:MGI:1913780]
ENSMUST00000019723	11.181	-1.06183	0.547089	-1.94088	0.0522728	0.197981	10.7559	7.70214	3.51781	17.5333	11.51	16.0667	Mydgf	ENSMUSG00000019579	myeloid derived growth factor [Source:MGI Symbol;Acc:MGI:2156020]
ENSMUST00000019726	34.2267	0.210468	0.326385	0.644847	0.519027	0.751927	43.0234	21.8227	43.9726	26.3	44.9937	25.2476	Plin3	ENSMUSG00000024197	perilipin 3 [Source:MGI Symbol;Acc:MGI:1914155]
ENSMUST00000019734	4.26651	0.0765627	0.875577	0.0874426	0.93032	NA	2.93341	7.70214	2.63835	5.84445	4.18546	2.29524	Cyb561	ENSMUSG00000019590	cytochrome b-561 [Source:MGI Symbol;Acc:MGI:103253]
ENSMUST00000019749	6.63622	-0.287292	0.688069	-0.417534	0.676288	NA	2.93341	5.13476	9.67397	6.81852	8.37092	6.88572	Hoxd8	ENSMUSG00000027102	homeobox D8 [Source:MGI Symbol;Acc:MGI:96209]
ENSMUST00000019829	0.348788	-1.85356	4.02474	-0.460542	0.645127	NA	0	0	0	0	2.09273	0	Synj2bp	ENSMUSG00000090935	synaptojanin 2 binding protein [Source:MGI Symbol;Acc:MGI:1344347]
ENSMUST00000019833	5.83244	-0.16875	0.801565	-0.210526	0.833257	NA	3.91122	6.41845	6.15616	13.637	1.04637	3.8254	Fmc1	ENSMUSG00000019689	formation of mitochondrial complex V assembly factor 1 [Source:MGI Symbol;Acc:MGI:1913367]
ENSMUST00000019843	23.5536	-0.394778	0.386159	-1.02232	0.30663	0.579517	24.4451	24.3901	12.3123	23.3778	37.6691	19.127	Akt3	ENSMUSG00000019699	thymoma viral proto-oncogene 3 [Source:MGI Symbol;Acc:MGI:1345147]
ENSMUST00000019859	15.3136	0.181613	0.443806	0.409217	0.68238	0.854737	20.5339	17.9717	10.5534	13.637	14.6491	14.5365	Gle1	ENSMUSG00000019715	GLE1 RNA export mediator (yeast) [Source:MGI Symbol;Acc:MGI:1921662]
ENSMUST00000019862	3.71247	0.129729	0.958733	0.135313	0.892365	NA	1.95561	2.56738	7.03561	5.84445	1.04637	3.8254	L3hypdh	ENSMUSG00000019718	L-3-hydroxyproline dehydratase (trans-) [Source:MGI Symbol;Acc:MGI:1914467]
ENSMUST00000019876	48.1669	0.195966	0.251068	0.780531	0.435078	0.691031	43.0234	56.4824	55.4054	43.8334	39.7619	50.4952	Calr3	ENSMUSG00000019732	calreticulin 3 [Source:MGI Symbol;Acc:MGI:1920566]
ENSMUST00000019878	31.5778	0.114355	0.313723	0.36451	0.715478	0.871763	39.1122	26.9575	32.5397	24.3519	28.2519	38.254	Leng1	ENSMUSG00000078813	leukocyte receptor cluster (LRC) member 1 [Source:MGI Symbol;Acc:MGI:1917007]
ENSMUST00000019906	1.7327	-0.894093	1.62425	-0.550465	0.582001	NA	0	3.85107	0	2.92222	2.09273	1.53016	Vip	ENSMUSG00000019772	vasoactive intestinal polypeptide [Source:MGI Symbol;Acc:MGI:98933]
ENSMUST00000019907	0.515856	-0.706037	3.55493	-0.198608	0.842569	NA	0	1.28369	0	0	1.04637	0.765079	Fbxo5	ENSMUSG00000019773	F-box protein 5 [Source:MGI Symbol;Acc:MGI:1914391]
ENSMUST00000019911	0.602291	1.32914	3.57349	0.371946	0.709933	NA	0	2.56738	0	0	1.04637	0	Hdac2	ENSMUSG00000019777	histone deacetylase 2 [Source:MGI Symbol;Acc:MGI:1097691]
ENSMUST00000019917	0.309543	1.89901	4.04988	0.468904	0.639138	NA	0.977805	0	0.879451	0	0	0	Rwdd1	ENSMUSG00000019782	RWD domain containing 1 [Source:MGI Symbol;Acc:MGI:1913771]
ENSMUST00000019937	2.15582	0.255129	1.3059	0.195366	0.845107	NA	1.95561	2.56738	2.63835	1.94815	0	3.8254	Sec63	ENSMUSG00000019802	SEC63-like (S. cerevisiae) [Source:MGI Symbol;Acc:MGI:2155302]
ENSMUST00000019944	51.2066	-0.116797	0.263999	-0.442412	0.658191	0.840555	43.0234	35.9433	67.7178	45.7815	51.2719	63.5016	Adat2	ENSMUSG00000019808	adenosine deaminase, tRNA-specific 2 [Source:MGI Symbol;Acc:MGI:1914007]
ENSMUST00000019950	7.33115	-0.556265	0.65415	-0.850364	0.395123	NA	8.80024	2.56738	6.15616	6.81852	10.4637	9.18095	Ltv1	ENSMUSG00000019814	LTV1 ribosome biogenesis factor [Source:MGI Symbol;Acc:MGI:2447810]
ENSMUST00000019954	0.348788	-1.85356	4.02474	-0.460542	0.645127	NA	0	0	0	0	2.09273	0	Zc2hc1b	ENSMUSG00000019815	zinc finger, C2HC-type containing 1B [Source:MGI Symbol;Acc:MGI:1922372]
ENSMUST00000019962	29.9628	-0.393585	0.320965	-1.22625	0.220103	0.483551	25.4229	32.0922	21.1068	33.1185	28.2519	39.7841	Cd164	ENSMUSG00000019818	CD164 antigen [Source:MGI Symbol;Acc:MGI:1859568]
ENSMUST00000019975	0.649383	-2.76659	3.69326	-0.749091	0.453802	NA	0	0	0	3.8963	0	0	Wasf1	ENSMUSG00000019831	WAS protein family, member 1 [Source:MGI Symbol;Acc:MGI:1890563]
ENSMUST00000019987	42.3221	-0.403448	0.279643	-1.44273	0.149097	0.384251	44.0012	24.3901	39.5753	49.6778	56.5037	39.7841	Traf3ip2	ENSMUSG00000019842	TRAF3 interacting protein 2 [Source:MGI Symbol;Acc:MGI:2143599]
ENSMUST00000019992	11.0014	0.457955	0.557688	0.821166	0.411552	0.668831	12.7115	3.85107	21.1068	9.74075	9.41729	9.18095	Lama4	ENSMUSG00000019846	laminin, alpha 4 [Source:MGI Symbol;Acc:MGI:109321]
ENSMUST00000019998	0.504429	1.17022	3.5924	0.32575	0.744614	NA	0.977805	1.28369	0	0	0	0.765079	Perp	ENSMUSG00000019851	PERP, TP53 apoptosis effector [Source:MGI Symbol;Acc:MGI:1929938]
ENSMUST00000020000	0.309543	1.89901	4.04988	0.468904	0.639138	NA	0.977805	0	0.879451	0	0	0	Hebp2	ENSMUSG00000019853	heme binding protein 2 [Source:MGI Symbol;Acc:MGI:1860084]
ENSMUST00000020002	0.641845	2.8937	3.72331	0.777183	0.437051	NA	0	3.85107	0	0	0	0	Abracl	ENSMUSG00000078453	ABRA C-terminal like [Source:MGI Symbol;Acc:MGI:1920362]
ENSMUST00000020003	0.439726	2.40092	4.00909	0.598869	0.54926	NA	0	0	2.63835	0	0	0	Fam184a	ENSMUSG00000019856	family with sequence similarity 184, member A [Source:MGI Symbol;Acc:MGI:1923156]
ENSMUST00000020004	5.10557	-0.633488	0.789866	-0.802019	0.422542	NA	3.91122	2.56738	5.27671	4.87037	9.41729	4.59048	Asf1a	ENSMUSG00000019857	anti-silencing function 1A histone chaperone [Source:MGI Symbol;Acc:MGI:1913653]
ENSMUST00000020016	2.67025	-1.66134	1.27914	-1.2988	0.194013	NA	0.977805	0	2.63835	0.974075	8.37092	3.06032	Gje1	ENSMUSG00000019867	gap junction protein, epsilon 1 [Source:MGI Symbol;Acc:MGI:1923993]
ENSMUST00000020022	10.2245	0.155053	0.542235	0.285952	0.774915	0.90049	12.7115	8.98583	10.5534	13.637	6.27819	9.18095	Smpdl3a	ENSMUSG00000019872	sphingomyelin phosphodiesterase, acid-like 3A [Source:MGI Symbol;Acc:MGI:1931437]
ENSMUST00000020023	1.24025	-0.175117	2.16327	-0.08095	0.935482	NA	0.977805	2.56738	0	3.8963	0	0	Reep3	ENSMUSG00000019873	receptor accessory protein 3 [Source:MGI Symbol;Acc:MGI:88930]
ENSMUST00000020024	0.562737	-0.887481	3.69787	-0.239998	0.810332	NA	0	1.28369	0	0	2.09273	0	Fabp7	ENSMUSG00000019874	fatty acid binding protein 7, brain [Source:MGI Symbol;Acc:MGI:101916]
ENSMUST00000020027	15.4644	-0.0383235	0.434644	-0.0881721	0.92974	0.967869	14.6671	14.1206	16.7096	13.637	19.8809	13.7714	Serinc1	ENSMUSG00000019877	serine incorporator 1 [Source:MGI Symbol;Acc:MGI:1926228]
ENSMUST00000020034	374.79	0.711603	0.103632	6.86663	6.57376e-12	2.16224e-10	464.457	471.114	459.953	310.73	276.24	266.248	Echdc1	ENSMUSG00000019883	enoyl Coenzyme A hydratase domain containing 1 [Source:MGI Symbol;Acc:MGI:1277169]
ENSMUST00000020064	1.35681	-0.260672	1.7554	-0.148497	0.88195	NA	0.977805	0	2.63835	1.94815	1.04637	1.53016	Fam162b	ENSMUSG00000019909	family with sequence similarity 162, member B [Source:MGI Symbol;Acc:MGI:1924546]
ENSMUST00000020071	0.325935	1.95736	4.04517	0.483876	0.628474	NA	1.95561	0	0	0	0	0	Sim1	ENSMUSG00000019913	single-minded family bHLH transcription factor 1 [Source:MGI Symbol;Acc:MGI:98306]
ENSMUST00000020078	1.68358	0.81665	1.63854	0.498403	0.6182	NA	3.91122	2.56738	0	0	2.09273	1.53016	Lims1	ENSMUSG00000019920	LIM and senescent cell antigen-like domains 1 [Source:MGI Symbol;Acc:MGI:1195263]
ENSMUST00000020081	5.57603	0.511554	0.753678	0.678744	0.4973	NA	5.86683	3.85107	9.67397	6.81852	4.18546	3.06032	Zwint	ENSMUSG00000019923	ZW10 interactor [Source:MGI Symbol;Acc:MGI:1289227]
ENSMUST00000020094	0.274088	0.167149	4.08047	0.0409631	0.967325	NA	0	0	0.879451	0	0	0.765079	Epyc	ENSMUSG00000019936	epiphycan [Source:MGI Symbol;Acc:MGI:107942]
ENSMUST00000020099	0.685528	-2.8351	3.27186	-0.866511	0.38621	NA	0	0	0	0.974075	3.1391	0	Cdk1	ENSMUSG00000019942	cyclin-dependent kinase 1 [Source:MGI Symbol;Acc:MGI:88351]
ENSMUST00000020103	8.86814	-0.432444	0.608848	-0.710265	0.47754	NA	9.77805	6.41845	6.15616	12.663	13.6027	4.59048	Cabcoco1	ENSMUSG00000019945	ciliary associated calcium binding coiled-coil 1 [Source:MGI Symbol;Acc:MGI:1920537]
ENSMUST00000020107	1.70497	-1.40472	1.62848	-0.862598	0.388358	NA	0	0	2.63835	2.92222	3.1391	1.53016	Atp2b1	ENSMUSG00000019943	ATPase, Ca++ transporting, plasma membrane 1 [Source:MGI Symbol;Acc:MGI:104653]
ENSMUST00000020109	0.916458	-3.26895	2.53223	-1.29094	0.196726	NA	0	0	0	2.92222	1.04637	1.53016	Actr6	ENSMUSG00000019948	ARP6 actin-related protein 6 [Source:MGI Symbol;Acc:MGI:1914269]
ENSMUST00000020112	2.65378	-0.832314	1.16915	-0.711894	0.47653	NA	1.95561	0	3.51781	2.92222	5.23183	2.29524	Uhrf1bp1l	ENSMUSG00000019951	UHRF1 (ICBP90) binding protein 1-like [Source:MGI Symbol;Acc:MGI:2442888]
ENSMUST00000020149	0.58301	0.0661818	3.34045	0.0198123	0.984193	NA	0	0	1.7589	0.974075	0	0.765079	Ikbip	ENSMUSG00000019975	IKBKB interacting protein [Source:MGI Symbol;Acc:MGI:1914704]
ENSMUST00000020161	1.69439	-0.362279	1.54631	-0.234286	0.814763	NA	1.95561	2.56738	0	0.974075	3.1391	1.53016	Arg1	ENSMUSG00000019987	arginase, liver [Source:MGI Symbol;Acc:MGI:88070]
ENSMUST00000020163	5.96324	-0.782399	0.751595	-1.04098	0.297883	NA	0.977805	5.13476	7.03561	5.84445	8.37092	8.41587	Nedd1	ENSMUSG00000019988	neural precursor cell expressed, developmentally down-regulated gene 1 [Source:MGI Symbol;Acc:MGI:97293]
ENSMUST00000020165	0.911212	0.77077	2.45613	0.313815	0.753662	NA	0	2.56738	0.879451	0.974075	1.04637	0	Pde7b	ENSMUSG00000019990	phosphodiesterase 7B [Source:MGI Symbol;Acc:MGI:1352752]
ENSMUST00000020171	1.09765	0.135312	2.32725	0.0581423	0.953635	NA	0	2.56738	0.879451	0	3.1391	0	Ccn2	ENSMUSG00000019997	cellular communication network factor 2 [Source:MGI Symbol;Acc:MGI:95537]
ENSMUST00000020173	28.571	0.309194	0.32136	0.962141	0.335979	0.606649	29.3341	29.5249	36.0575	27.2741	20.9273	28.3079	Map7	ENSMUSG00000019996	microtubule-associated protein 7 [Source:MGI Symbol;Acc:MGI:1328328]
ENSMUST00000020182	1.00476	1.20987	2.32395	0.520609	0.602639	NA	2.93341	1.28369	0	0	1.04637	0.765079	Pex7	ENSMUSG00000020003	peroxisomal biogenesis factor 7 [Source:MGI Symbol;Acc:MGI:1321392]
ENSMUST00000020185	0.325313	0.167149	4.08047	0.0409631	0.967325	NA	0.977805	0	0	0.974075	0	0	Il20ra	ENSMUSG00000020007	interleukin 20 receptor, alpha [Source:MGI Symbol;Acc:MGI:3605069]
ENSMUST00000020203	897.914	-0.0709945	0.162178	-0.437757	0.661562	0.841945	1006.16	827.98	792.386	1056.87	914.523	789.562	Snrpf	ENSMUSG00000020018	small nuclear ribonucleoprotein polypeptide F [Source:MGI Symbol;Acc:MGI:1917128]
ENSMUST00000020204	2.8304	-0.218396	1.17436	-0.18597	0.852469	NA	6.84463	0	0.879451	4.87037	2.09273	2.29524	Ntn4	ENSMUSG00000020019	netrin 4 [Source:MGI Symbol;Acc:MGI:1888978]
ENSMUST00000020208	80.6738	0.382391	0.214471	1.78295	0.0745947	0.253448	70.402	116.816	87.0657	68.1852	82.6628	58.9111	Fgd6	ENSMUSG00000020021	FYVE, RhoGEF and PH domain containing 6 [Source:MGI Symbol;Acc:MGI:1261419]
ENSMUST00000020217	2408.17	0.686965	0.0685765	10.0175	1.27689e-23	9.51692e-22	3092.8	3084.71	2739.49	1800.09	1803.93	1928	Nudt4	ENSMUSG00000020029	nudix (nucleoside diphosphate linked moiety X)-type motif 4 [Source:MGI Symbol;Acc:MGI:1918457]
ENSMUST00000020220	5.20886	0.12852	1.30384	0.0985699	0.92148	NA	10.7559	3.85107	1.7589	8.76667	0	6.12064	Nuak1	ENSMUSG00000020032	NUAK family, SNF1-like kinase, 1 [Source:MGI Symbol;Acc:MGI:1925226]
ENSMUST00000020222	4.64394	-0.684163	0.848854	-0.805984	0.420252	NA	1.95561	6.41845	2.63835	2.92222	6.27819	7.65079	4930463O16Rik	ENSMUSG00000020033	RIKEN cDNA 4930463O16 gene [Source:MGI Symbol;Acc:MGI:1923054]
ENSMUST00000020223	20.4066	1.22209	0.408482	2.99179	0.00277345	0.0214232	40.09	20.539	24.6246	13.637	13.6027	9.94603	Tcp11l2	ENSMUSG00000020034	t-complex 11 (mouse) like 2 [Source:MGI Symbol;Acc:MGI:2444679]
ENSMUST00000020226	0.87082	-0.744539	2.65996	-0.279906	0.77955	NA	1.95561	0	0	0.974075	0	2.29524	Rfx4	ENSMUSG00000020037	regulatory factor X, 4 (influences HLA class II expression) [Source:MGI Symbol;Acc:MGI:1918387]
ENSMUST00000020227	17.5381	-0.0812498	0.413606	-0.196443	0.844264	0.932033	15.6449	15.4043	20.2274	15.5852	14.6491	23.7175	Cry1	ENSMUSG00000020038	cryptochrome 1 (photolyase-like) [Source:MGI Symbol;Acc:MGI:1270841]
ENSMUST00000020234	5.56119	-0.621209	0.749321	-0.82903	0.407088	NA	3.91122	3.85107	5.27671	9.74075	5.23183	5.35556	Timp3	ENSMUSG00000020044	tissue inhibitor of metalloproteinase 3 [Source:MGI Symbol;Acc:MGI:98754]
ENSMUST00000020238	8.82582	0.0191239	1.03635	0.0184532	0.985277	NA	15.6449	7.70214	3.51781	4.87037	2.09273	19.127	Hsp90b1	ENSMUSG00000020048	heat shock protein 90, beta (Grp94), member 1 [Source:MGI Symbol;Acc:MGI:98817]
ENSMUST00000020252	0.686459	3.01851	2.99807	1.00682	0.314024	NA	1.95561	1.28369	0.879451	0	0	0	Sycp3	ENSMUSG00000020059	synaptonemal complex protein 3 [Source:MGI Symbol;Acc:MGI:109542]
ENSMUST00000020255	2.49197	0.392115	1.16206	0.337429	0.735793	NA	2.93341	3.85107	1.7589	0.974075	3.1391	2.29524	Slc5a8	ENSMUSG00000020062	solute carrier family 5 (iodide transporter), member 8 [Source:MGI Symbol;Acc:MGI:2384916]
ENSMUST00000020262	2.42915	0.0960141	1.26471	0.0759181	0.939484	NA	0.977805	3.85107	2.63835	2.92222	4.18546	0	Pbld2	ENSMUSG00000020072	phenazine biosynthesis-like protein domain containing 2 [Source:MGI Symbol;Acc:MGI:1914557]
ENSMUST00000020268	0.487659	-0.80092	3.97157	-0.201663	0.84018	NA	0.977805	0	0	1.94815	0	0	Ccar1	ENSMUSG00000020074	cell division cycle and apoptosis regulator 1 [Source:MGI Symbol;Acc:MGI:1914750]
ENSMUST00000020273	3.0302	-0.940656	1.09565	-0.858535	0.390597	NA	1.95561	2.56738	1.7589	7.7926	1.04637	3.06032	Supv3l1	ENSMUSG00000020079	suppressor of var1, 3-like 1 (S. cerevisiae) [Source:MGI Symbol;Acc:MGI:2441711]
ENSMUST00000020278	0.488902	2.53872	3.9999	0.634697	0.525626	NA	2.93341	0	0	0	0	0	Tacr2	ENSMUSG00000020081	tachykinin receptor 2 [Source:MGI Symbol;Acc:MGI:98477]
ENSMUST00000020283	11.342	-0.00470498	0.513342	-0.00916539	0.992687	0.996307	11.7337	7.70214	14.0712	10.7148	14.6491	9.18095	H2afy2	ENSMUSG00000020086	H2A histone family, member Y2 [Source:MGI Symbol;Acc:MGI:3037658]
ENSMUST00000020284	10.6459	-0.313396	0.582889	-0.53766	0.590812	0.798462	2.93341	14.1206	11.4329	10.7148	17.7882	6.88572	Tysnd1	ENSMUSG00000020087	trypsin domain containing 1 [Source:MGI Symbol;Acc:MGI:1919017]
ENSMUST00000020285	8.25326	-0.257626	0.605015	-0.425818	0.670241	NA	7.82244	3.85107	10.5534	9.74075	8.37092	9.18095	Sar1a	ENSMUSG00000020088	secretion associated Ras related GTPase 1A [Source:MGI Symbol;Acc:MGI:98230]
ENSMUST00000020286	7.56472	-0.777147	0.665736	-1.16735	0.24307	NA	8.80024	2.56738	5.27671	9.74075	5.23183	13.7714	Ppa1	ENSMUSG00000020089	pyrophosphatase (inorganic) 1 [Source:MGI Symbol;Acc:MGI:97831]
ENSMUST00000020287	1.51164	2.07733	1.84152	1.12805	0.259298	NA	2.93341	0	4.39726	0.974075	0	0.765079	Npffr1	ENSMUSG00000020090	neuropeptide FF receptor 1 [Source:MGI Symbol;Acc:MGI:2685082]
ENSMUST00000020288	14.1776	0.256243	0.467415	0.548214	0.583545	0.794919	14.6671	20.539	11.4329	17.5333	9.41729	11.4762	Eif4ebp2	ENSMUSG00000020091	eukaryotic translation initiation factor 4E binding protein 2 [Source:MGI Symbol;Acc:MGI:109198]
ENSMUST00000020289	1.84894	0.240042	1.52186	0.157729	0.87467	NA	0	2.56738	3.51781	1.94815	0	3.06032	Pald1	ENSMUSG00000020092	phosphatase domain containing, paladin 1 [Source:MGI Symbol;Acc:MGI:1351623]
ENSMUST00000020298	0.710523	-0.461756	2.98436	-0.154725	0.877038	NA	0	0	1.7589	0.974075	0	1.53016	Pcbd1	ENSMUSG00000020098	pterin 4 alpha carbinolamine dehydratase/dimerization cofactor of hepatocyte nuclear factor 1 alpha (TCF1) 1 [Source:MGI Symbol;Acc:MGI:94873]
ENSMUST00000020308	5.88896	0.77607	0.770285	1.00751	0.31369	NA	12.7115	2.56738	7.03561	1.94815	4.18546	6.88572	Ddit4	ENSMUSG00000020108	DNA-damage-inducible transcript 4 [Source:MGI Symbol;Acc:MGI:1921997]
ENSMUST00000020312	14.3327	0.289281	0.473475	0.610974	0.541217	0.765858	19.5561	17.9717	9.67397	13.637	16.7418	8.41587	Mcu	ENSMUSG00000009647	mitochondrial calcium uniporter [Source:MGI Symbol;Acc:MGI:3026965]
ENSMUST00000020315	252.244	-0.367005	0.116806	-3.142	0.00167799	0.0142671	216.095	231.064	214.586	279.559	289.843	282.314	Cand1	ENSMUSG00000020114	cullin associated and neddylation disassociated 1 [Source:MGI Symbol;Acc:MGI:1261820]
ENSMUST00000020317	5.22411	-1.15368	0.817475	-1.41128	0.158163	NA	0.977805	6.41845	2.63835	6.81852	8.37092	6.12064	Pno1	ENSMUSG00000020116	partner of NOB1 homolog [Source:MGI Symbol;Acc:MGI:1913499]
ENSMUST00000020321	0.38254	-2.03581	4.01094	-0.507563	0.61176	NA	0	0	0	0	0	2.29524	Plek	ENSMUSG00000020120	pleckstrin [Source:MGI Symbol;Acc:MGI:1860485]
ENSMUST00000020322	6.11706	1.33385	0.771291	1.72938	0.0837413	NA	6.84463	7.70214	11.4329	6.81852	3.1391	0.765079	Srgap1	ENSMUSG00000020121	SLIT-ROBO Rho GTPase activating protein 1 [Source:MGI Symbol;Acc:MGI:2152936]
ENSMUST00000020323	0.997712	-2.19188	2.46652	-0.888652	0.37419	NA	0.977805	0	0	1.94815	0	3.06032	Avpr1a	ENSMUSG00000020123	arginine vasopressin receptor 1A [Source:MGI Symbol;Acc:MGI:1859216]
ENSMUST00000020329	2.28143	-1.71908	1.35864	-1.26529	0.205768	NA	1.95561	1.28369	0	2.92222	5.23183	2.29524	Egfr	ENSMUSG00000020122	epidermal growth factor receptor [Source:MGI Symbol;Acc:MGI:95294]
ENSMUST00000020339	1.47494	0.0319422	1.88659	0.0169312	0.986491	NA	0	0	4.39726	2.92222	0	1.53016	Tbc1d15	ENSMUSG00000020130	TBC1 domain family, member 15 [Source:MGI Symbol;Acc:MGI:1913937]
ENSMUST00000020341	3.44151	0.262384	0.974238	0.269322	0.787682	NA	2.93341	3.85107	4.39726	5.84445	2.09273	1.53016	2310011J03Rik	ENSMUSG00000020133	RIKEN cDNA 2310011J03 gene [Source:MGI Symbol;Acc:MGI:1913624]
ENSMUST00000020343	14.5833	-0.279955	0.458935	-0.610011	0.541854	0.766296	7.82244	14.1206	17.589	17.5333	13.6027	16.8317	Rab21	ENSMUSG00000020132	RAB21, member RAS oncogene family [Source:MGI Symbol;Acc:MGI:894308]
ENSMUST00000020362	3.29408	0.0108787	1.0345	0.0105158	0.99161	NA	2.93341	6.41845	0.879451	3.8963	1.04637	4.59048	Kcnmb1	ENSMUSG00000020155	potassium large conductance calcium-activated channel, subfamily M, beta member 1 [Source:MGI Symbol;Acc:MGI:1334203]
ENSMUST00000020366	2.57424	-0.546239	1.36452	-0.400317	0.688923	NA	4.88902	1.28369	0	1.94815	7.32456	0	Gabrp	ENSMUSG00000020159	gamma-aminobutyric acid (GABA) A receptor, pi [Source:MGI Symbol;Acc:MGI:2387597]
ENSMUST00000020375	4.04133	-0.425979	0.903073	-0.4717	0.637141	NA	1.95561	5.13476	3.51781	3.8963	2.09273	7.65079	Rab3ip	ENSMUSG00000064181	RAB3A interacting protein [Source:MGI Symbol;Acc:MGI:105933]
ENSMUST00000020378	7.63867	3.17893	0.84491	3.76244	0.000168262	NA	10.7559	19.2553	11.4329	0	2.09273	2.29524	Best3	ENSMUSG00000020169	bestrophin 3 [Source:MGI Symbol;Acc:MGI:3580298]
ENSMUST00000020381	15.002	0.396185	0.452099	0.876324	0.380854	0.645756	24.4451	11.5532	14.9507	11.6889	13.6027	13.7714	Frs2	ENSMUSG00000020170	fibroblast growth factor receptor substrate 2 [Source:MGI Symbol;Acc:MGI:1100860]
ENSMUST00000020383	247.106	0.768421	0.213366	3.60142	0.000316487	0.00343769	316.809	323.49	295.496	155.852	153.816	237.175	Atp8b3	ENSMUSG00000003341	ATPase, class I, type 8B, member 3 [Source:MGI Symbol;Acc:MGI:1914581]
ENSMUST00000020392	1.01146	-1.01722	2.46104	-0.413329	0.679365	NA	1.95561	0	0	0.974075	3.1391	0	9530003J23Rik	ENSMUSG00000020177	RIKEN cDNA 9530003J23 gene [Source:MGI Symbol;Acc:MGI:1924647]
ENSMUST00000020397	12.5825	-0.298946	0.499694	-0.598259	0.549667	0.772781	8.80024	16.688	8.79451	18.5074	10.4637	12.2413	Snrpd3	ENSMUSG00000020180	small nuclear ribonucleoprotein D3 [Source:MGI Symbol;Acc:MGI:1914582]
ENSMUST00000020399	10.2576	-0.419497	0.56444	-0.743209	0.457355	0.708212	11.7337	11.5532	3.51781	9.74075	10.4637	14.5365	Cpm	ENSMUSG00000020183	carboxypeptidase M [Source:MGI Symbol;Acc:MGI:1917824]
ENSMUST00000020410	5.7031	0.195239	0.848593	0.230074	0.818035	NA	2.93341	12.8369	2.63835	8.76667	6.27819	0.765079	Spata48	ENSMUSG00000020191	spermatogenesis associated 48 [Source:MGI Symbol;Acc:MGI:1921112]
ENSMUST00000020413	128.385	0.062904	0.161091	0.390488	0.696176	0.861428	150.582	116.816	124.882	132.474	130.796	114.762	Zpbp	ENSMUSG00000020193	zona pellucida binding protein [Source:MGI Symbol;Acc:MGI:1855701]
ENSMUST00000020420	70.6454	-0.39758	0.213969	-1.85812	0.0631519	0.226429	69.4241	50.0639	62.4411	94.4853	73.2456	74.2127	Ap3d1	ENSMUSG00000020198	adaptor-related protein complex 3, delta 1 subunit [Source:MGI Symbol;Acc:MGI:107734]
ENSMUST00000020434	0.539883	2.6655	3.7154	0.717419	0.473116	NA	1.95561	1.28369	0	0	0	0	Glipr1l2	ENSMUSG00000020214	GLI pathogenesis-related 1 like 2 [Source:MGI Symbol;Acc:MGI:1914787]
ENSMUST00000020440	3.13902	-0.969611	1.07787	-0.899566	0.368351	NA	0.977805	3.85107	1.7589	5.84445	1.04637	5.35556	Timm13	ENSMUSG00000020219	translocase of inner mitochondrial membrane 13 [Source:MGI Symbol;Acc:MGI:1353432]
ENSMUST00000020444	0.600023	1.53895	3.26882	0.470798	0.637785	NA	1.95561	0	0.879451	0	0	0.765079	Llph	ENSMUSG00000020224	LLP homolog, long-term synaptic facilitation (Aplysia) [Source:MGI Symbol;Acc:MGI:1913475]
ENSMUST00000020449	3.89758	-1.31966	0.990729	-1.33201	0.182857	NA	1.95561	5.13476	0	3.8963	6.27819	6.12064	Helb	ENSMUSG00000020228	helicase (DNA) B [Source:MGI Symbol;Acc:MGI:2152895]
ENSMUST00000020456	3.99463	0.473351	0.894466	0.5292	0.596667	NA	2.93341	7.70214	3.51781	3.8963	2.09273	3.8254	4930404N11Rik	ENSMUSG00000020234	RIKEN cDNA 4930404N11 gene [Source:MGI Symbol;Acc:MGI:1921072]
ENSMUST00000020478	12.5529	0.110618	0.494316	0.22378	0.822928	0.922036	11.7337	17.9717	9.67397	8.76667	15.6955	11.4762	Hcfc2	ENSMUSG00000020246	host cell factor C2 [Source:MGI Symbol;Acc:MGI:1915183]
ENSMUST00000020485	3.97735	-0.334592	0.952748	-0.351186	0.725449	NA	4.88902	1.28369	4.39726	0.974075	3.1391	9.18095	Glt8d2	ENSMUSG00000020251	glycosyltransferase 8 domain containing 2 [Source:MGI Symbol;Acc:MGI:1922032]
ENSMUST00000020488	54.4358	-0.598964	0.247515	-2.41991	0.0155246	0.0851056	31.2898	44.9291	53.6465	71.1075	57.5501	68.0921	D10Wsu102e	ENSMUSG00000020255	DNA segment, Chr 10, Wayne State University 102, expressed [Source:MGI Symbol;Acc:MGI:106381]
ENSMUST00000020490	14.5902	-0.77053	0.471616	-1.63381	0.102299	0.305893	13.6893	12.8369	6.15616	23.3778	14.6491	16.8317	Wdr82	ENSMUSG00000020257	WD repeat domain containing 82 [Source:MGI Symbol;Acc:MGI:1924555]
ENSMUST00000020497	8.62234	-0.721439	0.676269	-1.06679	0.286065	NA	1.95561	12.8369	5.27671	17.5333	4.18546	9.94603	Aldh1l2	ENSMUSG00000020256	aldehyde dehydrogenase 1 family, member L2 [Source:MGI Symbol;Acc:MGI:2444680]
ENSMUST00000020500	2.70184	0.54101	1.18105	0.458076	0.646898	NA	5.86683	0	3.51781	2.92222	3.1391	0.765079	Appl2	ENSMUSG00000020263	adaptor protein, phosphotyrosine interaction, PH domain and leucine zipper containing 2 [Source:MGI Symbol;Acc:MGI:2384914]
ENSMUST00000020501	0.99271	1.24484	2.34012	0.531954	0.594758	NA	2.93341	1.28369	0	0.974075	0	0.765079	Sumo3	ENSMUSG00000020265	small ubiquitin-like modifier 3 [Source:MGI Symbol;Acc:MGI:1336201]
ENSMUST00000020504	0.29315	1.84622	4.0531	0.45551	0.648743	NA	0	0	1.7589	0	0	0	Hint1	ENSMUSG00000020267	histidine triad nucleotide binding protein 1 [Source:MGI Symbol;Acc:MGI:1321133]
ENSMUST00000020508	20.4608	0.292346	0.386211	0.756958	0.449075	0.702281	28.3563	19.2553	20.2274	16.5593	14.6491	23.7175	Smim23	ENSMUSG00000020270	small integral membrane protein 23 [Source:MGI Symbol;Acc:MGI:1916601]
ENSMUST00000020513	1.04584	-0.190901	2.36572	-0.0806947	0.935685	NA	2.93341	0	0	0	1.04637	2.29524	Papolg	ENSMUSG00000020273	poly(A) polymerase gamma [Source:MGI Symbol;Acc:MGI:2442119]
ENSMUST00000020522	10.9996	-0.932714	0.53723	-1.73615	0.0825368	0.270089	7.82244	8.98583	6.15616	9.74075	15.6955	17.5968	Pfkl	ENSMUSG00000020277	phosphofructokinase, liver, B-type [Source:MGI Symbol;Acc:MGI:97547]
ENSMUST00000020523	23.5465	-0.389295	0.35568	-1.09451	0.273732	0.54407	23.4673	15.4043	21.9863	23.3778	27.2055	29.8381	Pex13	ENSMUSG00000020283	peroxisomal biogenesis factor 13 [Source:MGI Symbol;Acc:MGI:1919379]
ENSMUST00000020528	10.3456	0.384656	0.59912	0.642036	0.52085	0.753251	18.5783	14.1206	2.63835	10.7148	8.37092	7.65079	Mpg	ENSMUSG00000020287	N-methylpurine-DNA glycosylase [Source:MGI Symbol;Acc:MGI:97073]
ENSMUST00000020549	0.567239	1.44392	3.66501	0.393976	0.693599	NA	0	0	2.63835	0	0	0.765079	Gzmm	ENSMUSG00000054206	granzyme M (lymphocyte met-ase 1) [Source:MGI Symbol;Acc:MGI:99549]
ENSMUST00000020550	32.3332	2.09342	0.381931	5.48114	4.22592e-08	9.47542e-07	29.3341	55.1987	72.9945	14.6111	7.32456	14.5365	Cdc34	ENSMUSG00000020307	cell division cycle 34 [Source:MGI Symbol;Acc:MGI:102657]
ENSMUST00000020552	14.8477	0.0895875	0.480469	0.186459	0.852085	0.934519	11.7337	23.1064	11.4329	22.4037	10.4637	9.94603	Tpgs1	ENSMUSG00000020308	tubulin polyglutamylase complex subunit 1 [Source:MGI Symbol;Acc:MGI:106618]
ENSMUST00000020554	1.30725	-0.803352	1.91523	-0.419455	0.674884	NA	1.95561	0	0.879451	1.94815	0	3.06032	Madcam1	ENSMUSG00000020310	mucosal vascular addressin cell adhesion molecule 1 [Source:MGI Symbol;Acc:MGI:103579]
ENSMUST00000020564	4.71087	-0.303476	0.923825	-0.328499	0.742534	NA	3.91122	1.28369	7.03561	1.94815	12.5564	1.53016	Shc2	ENSMUSG00000020312	SHC (Src homology 2 domain containing) transforming protein 2 [Source:MGI Symbol;Acc:MGI:106180]
ENSMUST00000020566	1.78912	-0.603699	1.48937	-0.405339	0.685228	NA	0	2.56738	1.7589	0.974075	3.1391	2.29524	Theg	ENSMUSG00000020317	testicular haploid expressed gene [Source:MGI Symbol;Acc:MGI:1338756]
ENSMUST00000020568	4.69817	-0.89403	0.832451	-1.07397	0.282835	NA	3.91122	1.28369	4.39726	4.87037	8.37092	5.35556	Wdpcp	ENSMUSG00000020319	WD repeat containing planar cell polarity effector [Source:MGI Symbol;Acc:MGI:2144467]
ENSMUST00000020576	38.2839	-0.142964	0.291019	-0.491254	0.623247	0.819532	25.4229	39.7944	43.9726	47.7297	34.53	38.254	Ccng1	ENSMUSG00000020326	cyclin G1 [Source:MGI Symbol;Acc:MGI:102890]
ENSMUST00000020578	2.09446	0.743981	1.32854	0.559999	0.57548	NA	1.95561	5.13476	0.879451	0.974075	2.09273	1.53016	Nudcd2	ENSMUSG00000020328	NudC domain containing 2 [Source:MGI Symbol;Acc:MGI:1277103]
ENSMUST00000020579	3.91844	0.125843	0.884814	0.142225	0.886902	NA	3.91122	3.85107	4.39726	4.87037	4.18546	2.29524	Hmmr	ENSMUSG00000020330	hyaluronan mediated motility receptor (RHAMM) [Source:MGI Symbol;Acc:MGI:104667]
ENSMUST00000020586	17.6657	-0.383771	0.43732	-0.877554	0.380186	0.644935	17.6005	12.8369	15.8301	12.663	15.6955	31.3683	Slc22a4	ENSMUSG00000020334	solute carrier family 22 (organic cation transporter), member 4 [Source:MGI Symbol;Acc:MGI:1353479]
ENSMUST00000020608	18.3477	0.213685	0.430102	0.496825	0.619313	0.817273	21.5117	14.1206	22.8657	27.2741	13.6027	10.7111	Ppp2ca	ENSMUSG00000020349	protein phosphatase 2 (formerly 2A), catalytic subunit, alpha isoform [Source:MGI Symbol;Acc:MGI:1321159]
ENSMUST00000020617	57.3377	0.0757269	0.242376	0.312436	0.75471	0.890983	50.8459	78.3051	48.3698	50.6519	63.8283	52.0254	Flt4	ENSMUSG00000020357	FMS-like tyrosine kinase 4 [Source:MGI Symbol;Acc:MGI:95561]
ENSMUST00000020625	63.1954	-0.262434	0.222298	-1.18055	0.237782	0.503446	52.8015	52.6313	65.9589	76.9519	71.1528	59.6762	Phykpl	ENSMUSG00000020359	5-phosphohydroxy-L-lysine phospholyase [Source:MGI Symbol;Acc:MGI:1920197]
ENSMUST00000020629	4.71946	1.23578	0.844289	1.46369	0.143278	NA	6.84463	7.70214	5.27671	4.87037	2.09273	1.53016	Gfpt2	ENSMUSG00000020363	glutamine fructose-6-phosphate transaminase 2 [Source:MGI Symbol;Acc:MGI:1338883]
ENSMUST00000020630	9.43008	0.262634	0.563049	0.46645	0.640893	0.830577	11.7337	6.41845	12.3123	8.76667	10.4637	6.88572	Hspa4	ENSMUSG00000020361	heat shock protein 4 [Source:MGI Symbol;Acc:MGI:1342292]
ENSMUST00000020640	2.93768	0.372974	1.08653	0.343271	0.731395	NA	0.977805	6.41845	2.63835	2.92222	3.1391	1.53016	Rack1	ENSMUSG00000020372	receptor for activated C kinase 1 [Source:MGI Symbol;Acc:MGI:101849]
ENSMUST00000020643	8.06535	-0.110372	0.61812	-0.178561	0.858283	NA	8.80024	10.2695	4.39726	10.7148	7.32456	6.88572	Rufy1	ENSMUSG00000020375	RUN and FYVE domain containing 1 [Source:MGI Symbol;Acc:MGI:2429762]
ENSMUST00000020647	22.9851	-0.0689194	0.370816	-0.185859	0.852556	0.934596	20.5339	25.6738	21.1068	33.1185	19.8809	17.5968	Mrnip	ENSMUSG00000020381	MRN complex interacting protein [Source:MGI Symbol;Acc:MGI:1915317]
ENSMUST00000020649	18.8488	0.203545	0.404573	0.503111	0.614886	0.814863	20.5339	19.2553	20.2274	17.5333	24.0664	11.4762	Rad50	ENSMUSG00000020380	RAD50 double strand break repair protein [Source:MGI Symbol;Acc:MGI:109292]
ENSMUST00000020650	8.25289	-0.752546	0.64109	-1.17385	0.240453	NA	7.82244	5.13476	5.27671	5.84445	17.7882	7.65079	Il13	ENSMUSG00000020383	interleukin 13 [Source:MGI Symbol;Acc:MGI:96541]
ENSMUST00000020653	5.3585	-1.26229	0.800241	-1.57739	0.114705	NA	1.95561	5.13476	2.63835	4.87037	8.37092	9.18095	Sar1b	ENSMUSG00000020386	secretion associated Ras related GTPase 1B [Source:MGI Symbol;Acc:MGI:1913647]
ENSMUST00000020657	10.8184	-0.137254	0.560482	-0.244886	0.806545	0.913554	9.77805	15.4043	6.15616	4.87037	15.6955	13.0064	Ube2b	ENSMUSG00000020390	ubiquitin-conjugating enzyme E2B [Source:MGI Symbol;Acc:MGI:102944]
ENSMUST00000020662	81.09	0.27501	0.199795	1.37646	0.168678	0.414798	96.8027	93.7094	75.6328	78.9001	79.5237	61.9714	Kremen1	ENSMUSG00000020393	kringle containing transmembrane protein 1 [Source:MGI Symbol;Acc:MGI:1933988]
ENSMUST00000020679	0.290481	0.167149	4.08047	0.0409631	0.967325	NA	0.977805	0	0	0	0	0.765079	Nipal4	ENSMUSG00000020411	NIPA-like domain containing 4 [Source:MGI Symbol;Acc:MGI:2444671]
ENSMUST00000020689	0.348788	-1.85356	4.02474	-0.460542	0.645127	NA	0	0	0	0	2.09273	0	Hormad2	ENSMUSG00000020419	HORMA domain containing 2 [Source:MGI Symbol;Acc:MGI:1923078]
ENSMUST00000020692	18.0551	-0.516676	0.413253	-1.25027	0.211202	0.471729	13.6893	19.2553	12.3123	18.5074	17.7882	26.7778	Btg2	ENSMUSG00000020423	B cell translocation gene 2, anti-proliferative [Source:MGI Symbol;Acc:MGI:108384]
ENSMUST00000020699	4.89946	-0.503838	0.862773	-0.583975	0.559237	NA	2.93341	7.70214	1.7589	1.94815	10.4637	4.59048	Castor1	ENSMUSG00000020424	cytosolic arginine sensor for mTORC1 subunit 1 [Source:MGI Symbol;Acc:MGI:1919212]
ENSMUST00000020702	0.899477	-1.86392	2.65462	-0.702141	0.482591	NA	0	1.28369	0	0.974075	3.1391	0	Igfbp3	ENSMUSG00000020427	insulin-like growth factor binding protein 3 [Source:MGI Symbol;Acc:MGI:96438]
ENSMUST00000020706	5.70585	-0.295616	0.732119	-0.403782	0.686373	NA	2.93341	6.41845	6.15616	5.84445	5.23183	7.65079	Adcy1	ENSMUSG00000020431	adenylate cyclase 1 [Source:MGI Symbol;Acc:MGI:99677]
ENSMUST00000020712	196.118	0.244604	0.135619	1.8036	0.0712935	0.245567	194.583	215.66	228.657	160.722	178.928	198.156	4921536K21Rik	ENSMUSG00000020434	RIKEN cDNA 4921536K21 gene [Source:MGI Symbol;Acc:MGI:1914680]
ENSMUST00000020717	0.325935	1.95736	4.04517	0.483876	0.628474	NA	1.95561	0	0	0	0	0	Arf5	ENSMUSG00000020440	ADP-ribosylation factor 5 [Source:MGI Symbol;Acc:MGI:99434]
ENSMUST00000020719	15.2907	0.252537	0.4711	0.536059	0.591918	0.79934	16.6227	17.9717	14.9507	21.4296	14.6491	6.12064	2310033P09Rik	ENSMUSG00000020441	RIKEN cDNA 2310033P09 gene [Source:MGI Symbol;Acc:MGI:1915112]
ENSMUST00000020734	1.96531	1.79398	1.46602	1.22371	0.221062	NA	4.88902	2.56738	1.7589	0	1.04637	1.53016	Eif4enif1	ENSMUSG00000020454	eukaryotic translation initiation factor 4E nuclear import factor 1 [Source:MGI Symbol;Acc:MGI:1921453]
ENSMUST00000020741	1.2523	-0.200223	2.01212	-0.0995081	0.920735	NA	0.977805	2.56738	0	2.92222	1.04637	0	Drg1	ENSMUSG00000020457	developmentally regulated GTP binding protein 1 [Source:MGI Symbol;Acc:MGI:1343297]
ENSMUST00000020753	4.03813	0.363702	0.964223	0.377197	0.706027	NA	0	7.70214	6.15616	2.92222	2.09273	5.35556	Clhc1	ENSMUSG00000020461	clathrin heavy chain linker domain containing 1 [Source:MGI Symbol;Acc:MGI:1920574]
ENSMUST00000020754	33.1251	-0.139305	0.313417	-0.444473	0.656701	0.839111	26.4007	42.3618	26.3835	42.8593	32.4373	28.3079	Cfap36	ENSMUSG00000020462	cilia and flagella associated protein 36 [Source:MGI Symbol;Acc:MGI:1913994]
ENSMUST00000020755	13.3519	-0.596631	0.498667	-1.19645	0.23152	0.497403	14.6671	8.98583	7.91506	19.4815	19.8809	9.18095	Ppp4r3b	ENSMUSG00000020463	protein phosphatase 4 regulatory subunit 3B [Source:MGI Symbol;Acc:MGI:2144474]
ENSMUST00000020756	2.61156	0.327597	1.17635	0.278486	0.780639	NA	3.91122	1.28369	3.51781	3.8963	0	3.06032	Pnpt1	ENSMUSG00000020464	polyribonucleotide nucleotidyltransferase 1 [Source:MGI Symbol;Acc:MGI:1918951]
ENSMUST00000020759	0.994136	0.0749083	2.45771	0.0304789	0.975685	NA	0	1.28369	1.7589	2.92222	0	0	Efemp1	ENSMUSG00000020467	epidermal growth factor-containing fibulin-like extracellular matrix protein 1 [Source:MGI Symbol;Acc:MGI:1339998]
ENSMUST00000020768	1233.47	0.384643	0.0847338	4.53942	5.64079e-06	9.14801e-05	1331.77	1341.46	1518.81	1006.22	1012.88	1189.7	Pgam2	ENSMUSG00000020475	phosphoglycerate mutase 2 [Source:MGI Symbol;Acc:MGI:1933118]
ENSMUST00000020776	151.02	0.446106	0.158464	2.81519	0.00487483	0.0339156	166.227	157.894	198.756	132.474	104.637	146.13	Ccdc117	ENSMUSG00000020482	coiled-coil domain containing 117 [Source:MGI Symbol;Acc:MGI:2144383]
ENSMUST00000020794	19.5287	0.497846	0.398774	1.24844	0.211869	0.472273	27.3785	15.4043	25.5041	11.6889	18.8346	18.3619	Ska2	ENSMUSG00000020492	spindle and kinetochore associated complex subunit 2 [Source:MGI Symbol;Acc:MGI:1913390]
ENSMUST00000020801	13.6535	-0.394151	0.468053	-0.842109	0.399727	0.660648	14.6671	10.2695	10.5534	16.5593	11.51	18.3619	Smg8	ENSMUSG00000020495	smg-8 homolog, nonsense mediated mRNA decay factor (C. elegans) [Source:MGI Symbol;Acc:MGI:1921383]
ENSMUST00000020804	252.32	0.345908	0.118322	2.92345	0.00346171	0.02561	280.63	304.234	263.835	225.985	216.598	222.638	Gdpd1	ENSMUSG00000061666	glycerophosphodiester phosphodiesterase domain containing 1 [Source:MGI Symbol;Acc:MGI:1913819]
ENSMUST00000020820	1.59378	0.0027013	1.8141	0.00148906	0.998812	NA	2.93341	0	1.7589	4.87037	0	0	Mrpl22	ENSMUSG00000020514	mitochondrial ribosomal protein L22 [Source:MGI Symbol;Acc:MGI:1333794]
ENSMUST00000020826	4.59553	0.723263	0.850273	0.850624	0.394978	NA	4.88902	2.56738	9.67397	1.94815	3.1391	5.35556	Sap30l	ENSMUSG00000020519	SAP30-like [Source:MGI Symbol;Acc:MGI:1354709]
ENSMUST00000020827	14.3357	0.126492	0.452802	0.279353	0.779974	0.902929	16.6227	15.4043	13.1918	11.6889	11.51	17.5968	Rnft1	ENSMUSG00000020521	ring finger protein, transmembrane 1 [Source:MGI Symbol;Acc:MGI:1924142]
ENSMUST00000020831	2.9681	-1.37927	1.14958	-1.19981	0.230213	NA	3.91122	0	0.879451	6.81852	3.1391	3.06032	Fam114a2	ENSMUSG00000020523	family with sequence similarity 114, member A2 [Source:MGI Symbol;Acc:MGI:1917629]
ENSMUST00000020835	367.611	0.603315	0.109991	5.48511	4.13203e-08	9.30837e-07	415.567	474.965	442.364	263	284.611	325.159	Ppm1d	ENSMUSG00000020525	protein phosphatase 1D magnesium-dependent, delta isoform [Source:MGI Symbol;Acc:MGI:1858214]
ENSMUST00000020846	1.19738	1.06947	3.89145	0.274827	0.78345	NA	4.88902	0	0	0	0	2.29524	Srebf1	ENSMUSG00000020538	sterol regulatory element binding transcription factor 1 [Source:MGI Symbol;Acc:MGI:107606]
ENSMUST00000020849	237.387	-0.204864	0.12434	-1.64761	0.0994319	0.300484	214.139	207.958	237.452	266.896	266.823	231.054	Tom1l1	ENSMUSG00000020541	target of myb1-like 1 (chicken) [Source:MGI Symbol;Acc:MGI:1919193]
ENSMUST00000020851	3.59498	-0.832283	1.02467	-0.812243	0.416652	NA	2.93341	5.13476	0	6.81852	2.09273	4.59048	Cox11	ENSMUSG00000020544	cytochrome c oxidase assembly protein 11, copper chaperone [Source:MGI Symbol;Acc:MGI:1917052]
ENSMUST00000020864	13.2969	0.164805	0.468532	0.351748	0.725027	0.877433	16.6227	14.1206	11.4329	10.7148	14.6491	12.2413	Pctp	ENSMUSG00000020553	phosphatidylcholine transfer protein [Source:MGI Symbol;Acc:MGI:107375]
ENSMUST00000020877	2.07257	1.22914	1.43117	0.858838	0.39043	NA	6.84463	0	1.7589	0.974075	2.09273	0.765079	Twistnb	ENSMUSG00000020561	twist basic helix-loop-helix transcription factor 1 neighbor [Source:MGI Symbol;Acc:MGI:106292]
ENSMUST00000020878	20.8735	-0.632966	0.401799	-1.57533	0.11518	0.329965	23.4673	11.5532	14.0712	27.2741	16.7418	32.1333	Efcab10	ENSMUSG00000020562	EF-hand calcium binding domain 10 [Source:MGI Symbol;Acc:MGI:1922290]
ENSMUST00000020886	18.3174	-0.425413	0.401705	-1.05902	0.289591	0.561548	11.7337	16.688	18.4685	21.4296	20.9273	20.6571	Nampt	ENSMUSG00000020572	nicotinamide phosphoribosyltransferase [Source:MGI Symbol;Acc:MGI:1929865]
ENSMUST00000020896	1.60062	-0.252187	1.60768	-0.156864	0.875352	NA	1.95561	2.56738	0	0.974075	1.04637	3.06032	Tspan13	ENSMUSG00000020577	tetraspanin 13 [Source:MGI Symbol;Acc:MGI:1913359]
ENSMUST00000020899	0.500329	0.996334	3.92217	0.254027	0.799475	NA	1.95561	0	0	0	1.04637	0	Matn3	ENSMUSG00000020583	matrilin 3 [Source:MGI Symbol;Acc:MGI:1328350]
ENSMUST00000020904	1.31778	1.03464	1.81941	0.56867	0.56958	NA	1.95561	2.56738	0.879451	0.974075	0	1.53016	Rock2	ENSMUSG00000020580	Rho-associated coiled-coil containing protein kinase 2 [Source:MGI Symbol;Acc:MGI:107926]
ENSMUST00000020909	266.19	0.140405	0.12294	1.14206	0.25343	0.521602	303.12	288.83	245.367	266.896	262.638	230.289	Laptm4a	ENSMUSG00000020585	lysosomal-associated protein transmembrane 4A [Source:MGI Symbol;Acc:MGI:108017]
ENSMUST00000020922	0.427897	2.30122	4.01629	0.572971	0.566664	NA	0	2.56738	0	0	0	0	Trib2	ENSMUSG00000020601	tribbles pseudokinase 2 [Source:MGI Symbol;Acc:MGI:2145021]
ENSMUST00000020926	52.9678	-0.302373	0.271925	-1.11197	0.26615	0.536589	69.4241	39.7944	33.4192	50.6519	53.3646	71.1524	Lratd1	ENSMUSG00000020607	LRAT domain containing 1 [Source:MGI Symbol;Acc:MGI:2145011]
ENSMUST00000020927	0.488037	1.11338	3.64848	0.305164	0.760242	NA	0	1.28369	0.879451	0	0	0.765079	Hs1bp3	ENSMUSG00000020605	HCLS1 binding protein 3 [Source:MGI Symbol;Acc:MGI:1913224]
ENSMUST00000020930	28.7406	-0.350548	0.354022	-0.990187	0.322083	0.590758	29.3341	28.2412	18.4685	18.5074	44.9937	32.8984	Gna13	ENSMUSG00000020611	guanine nucleotide binding protein, alpha 13 [Source:MGI Symbol;Acc:MGI:95768]
ENSMUST00000020947	12.9895	0.176293	0.478552	0.368387	0.712584	0.869671	10.7559	16.688	14.0712	8.76667	14.6491	13.0064	Rdh14	ENSMUSG00000020621	retinol dehydrogenase 14 (all-trans and 9-cis) [Source:MGI Symbol;Acc:MGI:1920402]
ENSMUST00000020958	4.64097	-1.79128	0.958859	-1.86814	0.0617423	NA	0.977805	2.56738	2.63835	10.7148	9.41729	1.53016	Klhl29	ENSMUSG00000020627	kelch-like 29 [Source:MGI Symbol;Acc:MGI:2683857]
ENSMUST00000020965	0.376294	0.167149	4.08047	0.0409631	0.967325	NA	0	1.28369	0	0.974075	0	0	Allc	ENSMUSG00000020636	allantoicase [Source:MGI Symbol;Acc:MGI:2136971]
ENSMUST00000020969	3.86523	-0.323561	0.930126	-0.347868	0.727939	NA	2.93341	3.85107	3.51781	0.974075	7.32456	4.59048	Cmpk2	ENSMUSG00000020638	cytidine monophosphate (UMP-CMP) kinase 2, mitochondrial [Source:MGI Symbol;Acc:MGI:99830]
ENSMUST00000020977	6.44064	0.593948	1.49901	0.396228	0.691937	NA	3.91122	16.688	2.63835	3.8963	11.51	0	Dus4l	ENSMUSG00000020648	dihydrouridine synthase 4-like (S. cerevisiae) [Source:MGI Symbol;Acc:MGI:1919166]
ENSMUST00000020980	1.45529	0.399917	1.63206	0.245038	0.806427	NA	0.977805	1.28369	2.63835	0.974075	2.09273	0.765079	Rrm2	ENSMUSG00000020649	ribonucleotide reductase M2 [Source:MGI Symbol;Acc:MGI:98181]
ENSMUST00000020982	2.90161	1.26333	1.12011	1.12786	0.259378	NA	4.88902	1.28369	6.15616	0.974075	1.04637	3.06032	Klf11	ENSMUSG00000020653	Kruppel-like factor 11 [Source:MGI Symbol;Acc:MGI:2653368]
ENSMUST00000020986	43.7938	-0.459314	0.282052	-1.62847	0.103425	0.307291	27.3785	47.4965	36.937	37.9889	50.2255	62.7365	Dnajc27	ENSMUSG00000020657	DnaJ heat shock protein family (Hsp40) member C27 [Source:MGI Symbol;Acc:MGI:2443036]
ENSMUST00000020999	28.4511	-0.0765472	0.34464	-0.222107	0.82423	0.922306	28.3563	19.2553	34.2986	34.0926	35.5764	19.127	Kif3c	ENSMUSG00000020668	kinesin family member 3C [Source:MGI Symbol;Acc:MGI:107979]
ENSMUST00000021001	69.8894	0.55245	0.210188	2.62836	0.00857985	0.0538142	76.2688	75.7377	96.7397	57.4704	56.5037	56.6159	Rab10	ENSMUSG00000020671	RAB10, member RAS oncogene family [Source:MGI Symbol;Acc:MGI:105066]
ENSMUST00000021005	1.01146	-1.01722	2.46104	-0.413329	0.679365	NA	1.95561	0	0	0.974075	3.1391	0	Tpo	ENSMUSG00000020673	thyroid peroxidase [Source:MGI Symbol;Acc:MGI:98813]
ENSMUST00000021028	1.62036	-1.98964	1.85777	-1.07098	0.284177	NA	0.977805	0	0.879451	6.81852	1.04637	0	Itgb3	ENSMUSG00000020689	integrin beta 3 [Source:MGI Symbol;Acc:MGI:96612]
ENSMUST00000021029	3.46391	-0.0731081	0.953557	-0.0766689	0.938887	NA	1.95561	3.85107	4.39726	3.8963	2.09273	4.59048	Efcab3	ENSMUSG00000020690	EF-hand calcium binding domain 3 [Source:MGI Symbol;Acc:MGI:1918144]
ENSMUST00000021044	2.07008	-0.641058	1.37963	-0.464658	0.642176	NA	2.93341	0	1.7589	4.87037	2.09273	0.765079	5530401A14Rik	ENSMUSG00000020703	RIKEN cDNA 5530401A14 gene [Source:MGI Symbol;Acc:MGI:1918638]
ENSMUST00000021046	33.05	-0.354277	0.306885	-1.15443	0.248326	0.514725	30.312	26.9575	29.9014	27.2741	38.7155	45.1397	Ddx42	ENSMUSG00000020705	DEAD (Asp-Glu-Ala-Asp) box polypeptide 42 [Source:MGI Symbol;Acc:MGI:1919297]
ENSMUST00000021048	16.6415	-0.526774	0.422886	-1.24566	0.212888	0.473491	11.7337	14.1206	14.9507	23.3778	18.8346	16.8317	Ftsj3	ENSMUSG00000020706	FtsJ RNA methyltransferase homolog 3 (E. coli) [Source:MGI Symbol;Acc:MGI:1860295]
ENSMUST00000021050	0.651248	1.58024	3.41275	0.463041	0.643335	NA	2.93341	0	0	0.974075	0	0	Adap2	ENSMUSG00000020709	ArfGAP with dual PH domains 2 [Source:MGI Symbol;Acc:MGI:2663075]
ENSMUST00000021052	4.7042	0.310243	0.839408	0.369597	0.711683	NA	1.95561	3.85107	9.67397	2.92222	5.23183	4.59048	Smarcd2	ENSMUSG00000078619	SWI/SNF related, matrix associated, actin dependent regulator of chromatin, subfamily d, member 2 [Source:MGI Symbol;Acc:MGI:1933621]
ENSMUST00000021056	5.32262	0.0832212	0.775895	0.107258	0.914584	NA	3.91122	6.41845	6.15616	8.76667	2.09273	4.59048	Scn4a	ENSMUSG00000001027	sodium channel, voltage-gated, type IV, alpha [Source:MGI Symbol;Acc:MGI:98250]
ENSMUST00000021062	4.96245	-0.0362559	0.825723	-0.0439081	0.964978	NA	5.86683	2.56738	6.15616	0.974075	7.32456	6.88572	Ddx5	ENSMUSG00000020719	DEAD (Asp-Glu-Ala-Asp) box polypeptide 5 [Source:MGI Symbol;Acc:MGI:105037]
ENSMUST00000021066	11.3675	0.217641	0.535403	0.4065	0.684375	0.85541	11.7337	19.2553	6.15616	7.7926	12.5564	10.7111	Cacng4	ENSMUSG00000020723	calcium channel, voltage-dependent, gamma subunit 4 [Source:MGI Symbol;Acc:MGI:1859167]
ENSMUST00000021077	34.6285	0.128016	0.303732	0.421478	0.673406	0.848998	27.3785	38.5107	43.0931	29.2222	28.2519	41.3143	Slc9a3r1	ENSMUSG00000020733	solute carrier family 9 (sodium/hydrogen exchanger), member 3 regulator 1 [Source:MGI Symbol;Acc:MGI:1349482]
ENSMUST00000021078	0.274088	0.167149	4.08047	0.0409631	0.967325	NA	0	0	0.879451	0	0	0.765079	Fdxr	ENSMUSG00000018861	ferredoxin reductase [Source:MGI Symbol;Acc:MGI:104724]
ENSMUST00000021083	48.2785	-0.140244	0.264284	-0.530656	0.595657	0.802004	40.09	53.915	44.852	36.0408	51.2719	63.5016	Jpt1	ENSMUSG00000020737	Jupiter microtubule associated homolog 1 [Source:MGI Symbol;Acc:MGI:1096361]
ENSMUST00000021085	1.63156	-2.05527	1.83872	-1.11777	0.263664	NA	0.977805	0	0.879451	0	1.04637	6.88572	Nup85	ENSMUSG00000020739	nucleoporin 85 [Source:MGI Symbol;Acc:MGI:3046173]
ENSMUST00000021087	3.85327	0.498131	0.907748	0.548754	0.583174	NA	3.91122	2.56738	7.03561	2.92222	2.09273	4.59048	Mif4gd	ENSMUSG00000020743	MIF4G domain containing [Source:MGI Symbol;Acc:MGI:1916924]
ENSMUST00000021091	0.788514	0.411068	3.05545	0.134536	0.892979	NA	0	0	2.63835	0	2.09273	0	Pafah1b1	ENSMUSG00000020745	platelet-activating factor acetylhydrolase, isoform 1b, subunit 1 [Source:MGI Symbol;Acc:MGI:109520]
ENSMUST00000021114	35.6189	0.172029	0.290783	0.591604	0.554116	0.774723	44.979	35.9433	32.5397	36.0408	28.2519	35.9587	Galk1	ENSMUSG00000020766	galactokinase 1 [Source:MGI Symbol;Acc:MGI:95730]
ENSMUST00000021135	13.2486	0.0384057	0.488417	0.078633	0.937325	0.972297	9.77805	15.4043	14.9507	8.76667	19.8809	10.7111	Ncbp3	ENSMUSG00000020783	nuclear cap binding subunit 3 [Source:MGI Symbol;Acc:MGI:1914124]
ENSMUST00000021155	8.71324	-0.533141	0.616011	-0.865474	0.386779	NA	2.93341	12.8369	6.15616	9.74075	8.37092	12.2413	Tekt1	ENSMUSG00000020799	tektin 1 [Source:MGI Symbol;Acc:MGI:1333819]
ENSMUST00000021157	14.147	-0.174432	0.499085	-0.349504	0.726711	0.878441	8.80024	14.1206	16.7096	25.3259	11.51	8.41587	Med31	ENSMUSG00000020801	mediator complex subunit 31 [Source:MGI Symbol;Acc:MGI:1914529]
ENSMUST00000021158	7.2979	0.442227	0.643743	0.686963	0.492106	NA	5.86683	11.5532	7.91506	6.81852	6.27819	5.35556	Txndc17	ENSMUSG00000020803	thioredoxin domain containing 17 [Source:MGI Symbol;Acc:MGI:1289248]
ENSMUST00000021161	27.1669	-0.0441996	0.33475	-0.132038	0.894954	0.955449	24.4451	23.1064	32.5397	32.1445	20.9273	29.8381	Slc13a5	ENSMUSG00000020805	solute carrier family 13 (sodium-dependent citrate transporter), member 5 [Source:MGI Symbol;Acc:MGI:3037150]
ENSMUST00000021164	0.562737	-0.887481	3.69787	-0.239998	0.810332	NA	0	1.28369	0	0	2.09273	0	Pimreg	ENSMUSG00000020808	PICALM interacting mitotic regulator [Source:MGI Symbol;Acc:MGI:1924434]
ENSMUST00000021166	6.70238	-0.346722	1.2847	-0.269887	0.787248	NA	7.82244	0	9.67397	1.94815	14.6491	6.12064	Cygb	ENSMUSG00000020810	cytoglobin [Source:MGI Symbol;Acc:MGI:2149481]
ENSMUST00000021170	1.35612	2.80286	2.12312	1.32016	0.186781	NA	1.95561	5.13476	0	0	1.04637	0	Mxra7	ENSMUSG00000020814	matrix-remodelling associated 7 [Source:MGI Symbol;Acc:MGI:1914872]
ENSMUST00000021190	0.255026	-1.46206	4.06074	-0.360047	0.718812	NA	0	0	0	0	0	1.53016	Coro6	ENSMUSG00000020836	coronin 6 [Source:MGI Symbol;Acc:MGI:2183448]
ENSMUST00000021197	1.01208	-0.0448722	2.62412	-0.0170999	0.986357	NA	2.93341	0	0	0	3.1391	0	Blmh	ENSMUSG00000020840	bleomycin hydrolase [Source:MGI Symbol;Acc:MGI:1345186]
ENSMUST00000021201	69.1987	-0.118177	0.207573	-0.569328	0.569134	0.786305	60.6239	71.8866	66.8383	77.926	69.0601	68.8572	Cpd	ENSMUSG00000020841	carboxypeptidase D [Source:MGI Symbol;Acc:MGI:107265]
ENSMUST00000021203	2.45676	-0.0141197	1.17418	-0.0120251	0.990406	NA	3.91122	2.56738	0.879451	1.94815	3.1391	2.29524	Timm22	ENSMUSG00000020843	translocase of inner mitochondrial membrane 22 [Source:MGI Symbol;Acc:MGI:1929742]
ENSMUST00000021204	165.706	-0.00801308	0.154257	-0.0519463	0.958571	0.982106	131.026	178.433	187.323	163.645	151.723	182.089	Nxn	ENSMUSG00000020844	nucleoredoxin [Source:MGI Symbol;Acc:MGI:109331]
ENSMUST00000021207	2.64851	-0.447741	1.19194	-0.37564	0.707185	NA	0	1.28369	5.27671	3.8963	3.1391	2.29524	Rflnb	ENSMUSG00000020846	refilin B [Source:MGI Symbol;Acc:MGI:1923816]
ENSMUST00000021209	5.64223	-0.071481	0.724362	-0.0986813	0.921391	NA	4.88902	6.41845	5.27671	4.87037	6.27819	6.12064	Doc2b	ENSMUSG00000020848	double C2, beta [Source:MGI Symbol;Acc:MGI:1100497]
ENSMUST00000021234	0.468975	-0.500453	4.05163	-0.123519	0.901696	NA	0	1.28369	0	0	0	1.53016	Cacna1g	ENSMUSG00000020866	calcium channel, voltage-dependent, T type, alpha 1G subunit [Source:MGI Symbol;Acc:MGI:1201678]
ENSMUST00000021239	139.262	0.189372	0.155377	1.21879	0.222923	0.487606	127.115	160.461	157.422	130.526	139.167	120.883	Lrrc59	ENSMUSG00000020869	leucine rich repeat containing 59 [Source:MGI Symbol;Acc:MGI:2138133]
ENSMUST00000021241	0.289859	-1.61836	4.04523	-0.400066	0.689108	NA	0	0	0	0.974075	0	0.765079	Dlx4	ENSMUSG00000020871	distal-less homeobox 4 [Source:MGI Symbol;Acc:MGI:94904]
ENSMUST00000021242	6.19593	-1.31047	0.745422	-1.75803	0.0787428	NA	2.93341	1.28369	6.15616	8.76667	7.32456	10.7111	Tac4	ENSMUSG00000020872	tachykinin 4 [Source:MGI Symbol;Acc:MGI:1931130]
ENSMUST00000021251	839.304	-0.0628443	0.0841256	-0.747029	0.455046	0.706272	848.735	838.249	779.194	800.689	837.092	931.867	Lrrc46	ENSMUSG00000020878	leucine rich repeat containing 46 [Source:MGI Symbol;Acc:MGI:1916547]
ENSMUST00000021271	2.28513	-0.0303911	1.38729	-0.0219068	0.982522	NA	5.86683	0	0.879451	0	3.1391	3.8254	Per1	ENSMUSG00000020893	period circadian clock 1 [Source:MGI Symbol;Acc:MGI:1098283]
ENSMUST00000021273	2.50895	-0.140009	1.15279	-0.121452	0.903333	NA	2.93341	2.56738	1.7589	2.92222	1.04637	3.8254	Vamp2	ENSMUSG00000020894	vesicle-associated membrane protein 2 [Source:MGI Symbol;Acc:MGI:1313277]
ENSMUST00000021283	0.348788	-1.85356	4.02474	-0.460542	0.645127	NA	0	0	0	0	2.09273	0	Pik3r5	ENSMUSG00000020901	phosphoinositide-3-kinase regulatory subunit 5 [Source:MGI Symbol;Acc:MGI:2443588]
ENSMUST00000021285	0.429421	-2.18309	4.00096	-0.545642	0.585312	NA	0	0	0	0	1.04637	1.53016	Stx8	ENSMUSG00000020903	syntaxin 8 [Source:MGI Symbol;Acc:MGI:1890156]
ENSMUST00000021286	3.45804	-1.3715	1.01829	-1.34686	0.178026	NA	2.93341	0	2.63835	4.87037	4.18546	6.12064	Stx8	ENSMUSG00000020903	syntaxin 8 [Source:MGI Symbol;Acc:MGI:1890156]
ENSMUST00000021287	3.92015	-1.19649	0.921841	-1.29793	0.19431	NA	1.95561	2.56738	2.63835	6.81852	4.18546	5.35556	Cfap52	ENSMUSG00000020904	cilia and flagella associated protein 52 [Source:MGI Symbol;Acc:MGI:1919110]
ENSMUST00000021289	12.4749	0.481301	0.499445	0.963672	0.33521	0.605591	11.7337	11.5532	20.2274	6.81852	11.51	13.0064	Glp2r	ENSMUSG00000049928	glucagon-like peptide 2 receptor [Source:MGI Symbol;Acc:MGI:2136733]
ENSMUST00000021290	0.802237	-0.512449	2.80033	-0.182996	0.854801	NA	1.95561	0	0	0	2.09273	0.765079	Rcvrn	ENSMUSG00000020907	recoverin [Source:MGI Symbol;Acc:MGI:97883]
ENSMUST00000021296	1.77036	0.606006	1.51291	0.400558	0.688746	NA	0.977805	3.85107	1.7589	0.974075	0	3.06032	Tmem101	ENSMUSG00000020921	transmembrane protein 101 [Source:MGI Symbol;Acc:MGI:1923797]
ENSMUST00000021302	0.255026	-1.46206	4.06074	-0.360047	0.718812	NA	0	0	0	0	0	1.53016	Higd1b	ENSMUSG00000020928	HIG1 domain family, member 1B [Source:MGI Symbol;Acc:MGI:1922939]
ENSMUST00000021307	14.6208	-0.837715	0.46384	-1.80604	0.0709113	0.244862	7.82244	11.5532	12.3123	19.4815	13.6027	22.9524	Ccdc103	ENSMUSG00000020930	coiled-coil domain containing 103 [Source:MGI Symbol;Acc:MGI:1920543]
ENSMUST00000021311	53.9942	-0.235577	0.236046	-0.998012	0.318274	0.588655	52.8015	55.1987	41.3342	59.4186	58.5964	56.6159	Kif18b	ENSMUSG00000051378	kinesin family member 18B [Source:MGI Symbol;Acc:MGI:2446979]
ENSMUST00000021314	61.8412	0.0481431	0.220851	0.217989	0.827438	0.923682	61.6017	65.4682	61.5616	71.1075	55.4573	55.8508	Nmt1	ENSMUSG00000020936	N-myristoyltransferase 1 [Source:MGI Symbol;Acc:MGI:102579]
ENSMUST00000021324	47.7971	-0.054069	0.257224	-0.210202	0.83351	0.927168	60.6239	37.227	42.2137	47.7297	52.3183	46.6698	Map3k14	ENSMUSG00000020941	mitogen-activated protein kinase kinase kinase 14 [Source:MGI Symbol;Acc:MGI:1858204]
ENSMUST00000021329	55.8886	0.129651	0.236764	0.547595	0.58397	0.795198	67.4685	56.4824	51.8876	53.5741	43.9473	61.9714	Gosr2	ENSMUSG00000020946	golgi SNAP receptor complex member 2 [Source:MGI Symbol;Acc:MGI:1927204]
ENSMUST00000021338	3.38859	-0.0475031	1.05152	-0.0451758	0.963967	NA	0.977805	3.85107	5.27671	4.87037	0	5.35556	Ap4s1	ENSMUSG00000020955	adaptor-related protein complex AP-4, sigma 1 [Source:MGI Symbol;Acc:MGI:1337065]
ENSMUST00000021343	0.255026	-1.46206	4.06074	-0.360047	0.718812	NA	0	0	0	0	0	1.53016	Tshr	ENSMUSG00000020963	thyroid stimulating hormone receptor [Source:MGI Symbol;Acc:MGI:98849]
ENSMUST00000021345	12.3986	-0.507917	0.493799	-1.02859	0.303672	0.576582	11.7337	6.41845	12.3123	15.5852	11.51	16.8317	Gtf2a1	ENSMUSG00000020962	general transcription factor II A, 1 [Source:MGI Symbol;Acc:MGI:1933277]
ENSMUST00000021346	7.12923	-0.897991	0.69713	-1.28813	0.197702	NA	1.95561	5.13476	7.91506	8.76667	5.23183	13.7714	Tshr	ENSMUSG00000020963	thyroid stimulating hormone receptor [Source:MGI Symbol;Acc:MGI:98849]
ENSMUST00000021356	72.7946	-0.295901	0.20564	-1.43893	0.150172	0.386074	66.4907	53.915	74.7534	77.926	79.5237	84.1587	Dnaaf2	ENSMUSG00000020973	dynein, axonemal assembly factor 2 [Source:MGI Symbol;Acc:MGI:1923566]
ENSMUST00000021362	14.0252	-0.602363	0.493271	-1.22116	0.222025	0.486391	10.7559	17.9717	5.27671	13.637	21.9737	14.5365	Klhdc2	ENSMUSG00000020978	kelch domain containing 2 [Source:MGI Symbol;Acc:MGI:1916804]
ENSMUST00000021368	27.0764	-0.0641596	0.354254	-0.181112	0.85628	0.936579	32.2676	16.688	29.9014	37.9889	18.8346	26.7778	Nemf	ENSMUSG00000020982	nuclear export mediator factor [Source:MGI Symbol;Acc:MGI:1918305]
ENSMUST00000021370	13.2917	0.429729	0.820632	0.523656	0.600518	0.805211	12.7115	17.9717	14.9507	22.4037	9.41729	2.29524	L2hgdh	ENSMUSG00000020988	L-2-hydroxyglutarate dehydrogenase [Source:MGI Symbol;Acc:MGI:2384968]
ENSMUST00000021375	0.927604	0.805525	2.43473	0.330848	0.740759	NA	0.977805	2.56738	0	0.974075	1.04637	0	Sec23a	ENSMUSG00000020986	SEC23 homolog A, COPII coat complex component [Source:MGI Symbol;Acc:MGI:1349635]
ENSMUST00000021377	17.0587	-0.377573	0.421454	-0.895881	0.370316	0.638709	11.7337	19.2553	14.0712	20.4556	14.6491	22.1873	Cdkl1	ENSMUSG00000020990	cyclin-dependent kinase-like 1 (CDC2-related kinase) [Source:MGI Symbol;Acc:MGI:1918341]
ENSMUST00000021378	2.98025	0.500713	1.04609	0.478653	0.632186	NA	4.88902	3.85107	1.7589	1.94815	3.1391	2.29524	4930512B01Rik	ENSMUSG00000020992	RIKEN cDNA 4930512B01 gene [Source:MGI Symbol;Acc:MGI:1921974]
ENSMUST00000021379	1.7399	2.09048	1.70018	1.22956	0.218861	NA	0.977805	3.85107	3.51781	0	2.09273	0	Gemin2	ENSMUSG00000060121	gem nuclear organelle associated protein 2 [Source:MGI Symbol;Acc:MGI:1913853]
ENSMUST00000021381	3.11298	-0.943613	1.07994	-0.873762	0.382248	NA	0	3.85107	2.63835	3.8963	5.23183	3.06032	Pnn	ENSMUSG00000020994	pinin [Source:MGI Symbol;Acc:MGI:1100514]
ENSMUST00000021390	2.23514	-2.54754	1.48452	-1.71607	0.0861496	NA	0.977805	0	0.879451	4.87037	2.09273	4.59048	Galc	ENSMUSG00000021003	galactosylceramidase [Source:MGI Symbol;Acc:MGI:95636]
ENSMUST00000021399	4.74263	-1.0043	0.831507	-1.20781	0.227122	NA	1.95561	5.13476	2.63835	5.84445	5.23183	7.65079	Zc3h14	ENSMUSG00000021012	zinc finger CCCH type containing 14 [Source:MGI Symbol;Acc:MGI:1919824]
ENSMUST00000021405	2.59535	-3.72307	1.52213	-2.44597	0.0144464	NA	0	0	0.879451	4.87037	5.23183	4.59048	Polr2h	ENSMUSG00000021018	polymerase (RNA) II (DNA directed) polypeptide H [Source:MGI Symbol;Acc:MGI:2384309]
ENSMUST00000021410	54.5389	-0.0263233	0.254829	-0.103298	0.917727	0.962591	52.8015	46.2128	63.3205	59.4186	36.6228	68.8572	Ppp2r3c	ENSMUSG00000021022	protein phosphatase 2, regulatory subunit B'', gamma [Source:MGI Symbol;Acc:MGI:1930009]
ENSMUST00000021411	13.1367	1.34139	0.495757	2.70573	0.00681541	0.0451194	19.5561	14.1206	22.8657	6.81852	6.27819	9.18095	Prorp	ENSMUSG00000021023	protein only RNase P catalytic subunit [Source:MGI Symbol;Acc:MGI:1913382]
ENSMUST00000021413	1.88905	-0.331421	1.35138	-0.245245	0.806267	NA	1.95561	1.28369	1.7589	1.94815	2.09273	2.29524	Nfkbia	ENSMUSG00000021025	nuclear factor of kappa light polypeptide gene enhancer in B cells inhibitor, alpha [Source:MGI Symbol;Acc:MGI:104741]
ENSMUST00000021416	3.01521	0.892611	1.10397	0.808545	0.418777	NA	1.95561	6.41845	3.51781	0	3.1391	3.06032	Mbip	ENSMUSG00000021028	MAP3K12 binding inhibitory protein 1 [Source:MGI Symbol;Acc:MGI:1918320]
ENSMUST00000021424	1.18648	-0.492397	3.88286	-0.126813	0.899089	NA	2.93341	0	0	0	4.18546	0	Sptlc2	ENSMUSG00000021036	serine palmitoyltransferase, long chain base subunit 2 [Source:MGI Symbol;Acc:MGI:108074]
ENSMUST00000021428	31.775	-0.276033	0.308738	-0.894069	0.371285	0.639278	30.312	33.3759	22.8657	38.963	34.53	30.6032	Snw1	ENSMUSG00000021039	SNW domain containing 1 [Source:MGI Symbol;Acc:MGI:1913604]
ENSMUST00000021438	2.59543	-1.49594	1.31014	-1.14182	0.253529	NA	0.977805	1.28369	1.7589	9.74075	1.04637	0.765079	Nova1	ENSMUSG00000021047	neuro-oncological ventral antigen 1 [Source:MGI Symbol;Acc:MGI:104297]
ENSMUST00000021447	1.90892	-0.740493	1.39357	-0.531363	0.595167	NA	0.977805	2.56738	0.879451	2.92222	1.04637	3.06032	Ppp2r5e	ENSMUSG00000021051	protein phosphatase 2, regulatory subunit B', epsilon [Source:MGI Symbol;Acc:MGI:1349473]
ENSMUST00000021450	3.08147	-0.124495	1.02917	-0.120966	0.903718	NA	4.88902	1.28369	2.63835	1.94815	3.1391	4.59048	Sgpp1	ENSMUSG00000021054	sphingosine-1-phosphate phosphatase 1 [Source:MGI Symbol;Acc:MGI:2135760]
ENSMUST00000021453	0.452205	-2.25201	3.99662	-0.563479	0.573109	NA	0	0	0	1.94815	0	0.765079	Tex21	ENSMUSG00000021056	testis expressed gene 21 [Source:MGI Symbol;Acc:MGI:1931131]
ENSMUST00000021458	7.67309	-0.516018	0.663491	-0.777732	0.436727	NA	2.93341	6.41845	9.67397	4.87037	8.37092	13.7714	Sptb	ENSMUSG00000021061	spectrin beta, erythrocytic [Source:MGI Symbol;Acc:MGI:98387]
ENSMUST00000021459	1.00886	1.44721	2.44981	0.590746	0.554691	NA	1.95561	2.56738	0	0	0	1.53016	Rab15	ENSMUSG00000021062	RAB15, member RAS oncogene family [Source:MGI Symbol;Acc:MGI:1916865]
ENSMUST00000021466	371.046	0.191632	0.115719	1.65602	0.0977182	0.297788	401.878	329.908	452.038	368.2	333.79	340.46	Atl1	ENSMUSG00000021066	atlastin GTPase 1 [Source:MGI Symbol;Acc:MGI:1921241]
ENSMUST00000021467	18.2458	0.238826	0.429822	0.55564	0.578457	0.792913	20.5339	20.539	18.4685	6.81852	20.9273	22.1873	Sav1	ENSMUSG00000021067	salvador family WW domain containing 1 [Source:MGI Symbol;Acc:MGI:1927144]
ENSMUST00000021471	3.15517	-1.12658	1.096	-1.0279	0.303997	NA	4.88902	0	0.879451	4.87037	5.23183	3.06032	Tmx1	ENSMUSG00000021072	thioredoxin-related transmembrane protein 1 [Source:MGI Symbol;Acc:MGI:1919986]
ENSMUST00000021479	1.31326	-1.75572	3.91832	-0.44808	0.654096	NA	0	0	1.7589	0	0	6.12064	Actr10	ENSMUSG00000021076	ARP10 actin-related protein 10 [Source:MGI Symbol;Acc:MGI:1891654]
ENSMUST00000021486	2.14153	1.3428	1.38961	0.966316	0.333886	NA	2.93341	0	6.15616	1.94815	1.04637	0.765079	Timm9	ENSMUSG00000021079	translocase of inner mitochondrial membrane 9 [Source:MGI Symbol;Acc:MGI:1353436]
ENSMUST00000021490	0.255026	-1.46206	4.06074	-0.360047	0.718812	NA	0	0	0	0	0	1.53016	Serpina1f	ENSMUSG00000021081	serine (or cysteine) peptidase inhibitor, clade A, member 1F [Source:MGI Symbol;Acc:MGI:1915598]
ENSMUST00000021494	61.0467	-0.429257	0.244114	-1.75843	0.0786742	0.26218	48.8902	52.6313	54.526	95.4593	51.2719	63.5016	Ccdc175	ENSMUSG00000021086	coiled-coil domain containing 175 [Source:MGI Symbol;Acc:MGI:1921186]
ENSMUST00000021495	5.98067	0.814315	0.72598	1.12168	0.262	NA	6.84463	8.98583	7.03561	6.81852	3.1391	3.06032	Serpina5	ENSMUSG00000041550	serine (or cysteine) peptidase inhibitor, clade A, member 5 [Source:MGI Symbol;Acc:MGI:107817]
ENSMUST00000021506	1.94062	3.41004	1.72388	1.97812	0.0479152	NA	5.86683	3.85107	0.879451	0	1.04637	0	Serpina3n	ENSMUSG00000021091	serine (or cysteine) peptidase inhibitor, clade A, member 3N [Source:MGI Symbol;Acc:MGI:105045]
ENSMUST00000021513	4.46134	-0.760942	0.878975	-0.865715	0.386647	NA	0.977805	2.56738	6.15616	4.87037	8.37092	3.8254	Gsc	ENSMUSG00000021095	goosecoid homeobox [Source:MGI Symbol;Acc:MGI:95841]
ENSMUST00000021514	0.977598	-1.16286	2.49474	-0.466127	0.641124	NA	0	0	1.7589	0	1.04637	3.06032	Ppm1a	ENSMUSG00000021096	protein phosphatase 1A, magnesium dependent, alpha isoform [Source:MGI Symbol;Acc:MGI:99878]
ENSMUST00000021520	0.483937	0.940785	3.66412	0.256756	0.797367	NA	0.977805	0	0.879451	0	1.04637	0	4930408O17Rik	ENSMUSG00000021101	RIKEN cDNA 4930408O17 gene [Source:MGI Symbol;Acc:MGI:1921178]
ENSMUST00000021522	0.495364	-0.890797	3.94145	-0.226007	0.821196	NA	0	0	0.879451	0	2.09273	0	Glrx5	ENSMUSG00000021102	glutaredoxin 5 [Source:MGI Symbol;Acc:MGI:1920296]
ENSMUST00000021532	0.976074	1.39425	2.49211	0.559465	0.575845	NA	0	2.56738	1.7589	0	0	1.53016	Snapc1	ENSMUSG00000021113	small nuclear RNA activating complex, polypeptide 1 [Source:MGI Symbol;Acc:MGI:1922877]
ENSMUST00000021536	11.1755	0.0365464	0.544248	0.0671503	0.946462	0.976003	4.88902	10.2695	18.4685	11.6889	12.5564	9.18095	Atp6v1d	ENSMUSG00000021114	ATPase, H+ transporting, lysosomal V1 subunit D [Source:MGI Symbol;Acc:MGI:1921084]
ENSMUST00000021544	1.034	-0.9075	2.27166	-0.399488	0.689534	NA	0	1.28369	0.879451	1.94815	2.09273	0	Plek2	ENSMUSG00000021118	pleckstrin 2 [Source:MGI Symbol;Acc:MGI:1351466]
ENSMUST00000021547	1.9817	1.80732	1.49346	1.21016	0.226218	NA	5.86683	2.56738	0.879451	0	1.04637	1.53016	Zfyve26	ENSMUSG00000066440	zinc finger, FYVE domain containing 26 [Source:MGI Symbol;Acc:MGI:1924767]
ENSMUST00000021550	6.45949	0.458115	0.678847	0.674843	0.499775	NA	6.84463	7.70214	7.91506	3.8963	6.27819	6.12064	Arg2	ENSMUSG00000021125	arginase type II [Source:MGI Symbol;Acc:MGI:1330806]
ENSMUST00000021552	2.66266	-2.02563	1.28715	-1.57374	0.115548	NA	1.95561	1.28369	0	6.81852	2.09273	3.8254	Zfp36l1	ENSMUSG00000021127	zinc finger protein 36, C3H type-like 1 [Source:MGI Symbol;Acc:MGI:107946]
ENSMUST00000021559	10.3539	-0.40874	0.543233	-0.752422	0.451798	0.704404	7.82244	6.41845	12.3123	12.663	8.37092	14.5365	Erh	ENSMUSG00000021131	ERH mRNA splicing and mitosis factor [Source:MGI Symbol;Acc:MGI:108089]
ENSMUST00000021567	7.30998	-0.392321	1.16036	-0.338104	0.735285	NA	12.7115	0	6.15616	3.8963	7.32456	13.7714	Pcnx	ENSMUSG00000021140	pecanex homolog [Source:MGI Symbol;Acc:MGI:1891924]
ENSMUST00000021592	11.6958	0.121085	0.521118	0.232357	0.816261	0.919113	16.6227	14.1206	6.15616	12.663	8.37092	12.2413	Cdca7l	ENSMUSG00000021175	cell division cycle associated 7 like [Source:MGI Symbol;Acc:MGI:2384982]
ENSMUST00000021595	6.69695	-0.243982	0.706888	-0.34515	0.729982	NA	1.95561	7.70214	8.79451	3.8963	9.41729	8.41587	Psmc1	ENSMUSG00000021178	protease (prosome, macropain) 26S subunit, ATPase 1 [Source:MGI Symbol;Acc:MGI:106054]
ENSMUST00000021596	22.8674	-0.0625657	0.364097	-0.171838	0.863565	0.939462	15.6449	26.9575	24.6246	26.3	23.02	20.6571	Nrde2	ENSMUSG00000021179	nrde-2 necessary for RNA interference, domain containing [Source:MGI Symbol;Acc:MGI:2670969]
ENSMUST00000021603	0.337362	0.167149	4.08047	0.0409631	0.967325	NA	0.977805	0	0	0	1.04637	0	Fbln5	ENSMUSG00000021186	fibulin 5 [Source:MGI Symbol;Acc:MGI:1346091]
ENSMUST00000021605	3.67578	-2.15493	1.05219	-2.04803	0.0405566	NA	0.977805	1.28369	1.7589	4.87037	6.27819	6.88572	Trip11	ENSMUSG00000021188	thyroid hormone receptor interactor 11 [Source:MGI Symbol;Acc:MGI:1924393]
ENSMUST00000021606	6.19363	-1.34833	0.739308	-1.82377	0.0681864	NA	2.93341	5.13476	2.63835	10.7148	7.32456	8.41587	Atxn3	ENSMUSG00000021189	ataxin 3 [Source:MGI Symbol;Acc:MGI:1099442]
ENSMUST00000021610	11.7846	1.23195	0.541016	2.2771	0.0227803	0.112473	12.7115	17.9717	19.3479	2.92222	6.27819	11.4762	Chga	ENSMUSG00000021194	chromogranin A [Source:MGI Symbol;Acc:MGI:88394]
ENSMUST00000021617	0.697264	0.106669	2.84996	0.0374284	0.970143	NA	0	1.28369	0.879451	0.974075	1.04637	0	Asb2	ENSMUSG00000021200	ankyrin repeat and SOCS box-containing 2 [Source:MGI Symbol;Acc:MGI:1929743]
ENSMUST00000021631	5.01281	-0.205272	0.798649	-0.257023	0.797161	NA	3.91122	3.85107	6.15616	1.94815	7.32456	6.88572	Ppp4r4	ENSMUSG00000021209	protein phosphatase 4, regulatory subunit 4 [Source:MGI Symbol;Acc:MGI:1921771]
ENSMUST00000021632	2.24852	0.950998	1.32532	0.717562	0.473027	NA	0.977805	2.56738	5.27671	0	3.1391	1.53016	Akr1c12	ENSMUSG00000021211	aldo-keto reductase family 1, member C12 [Source:MGI Symbol;Acc:MGI:1351661]
ENSMUST00000021634	2.06062	-2.21642	1.62674	-1.36249	0.173043	NA	0.977805	1.28369	0	4.87037	5.23183	0	Akr1c13	ENSMUSG00000021213	aldo-keto reductase family 1, member C13 [Source:MGI Symbol;Acc:MGI:1351662]
ENSMUST00000021641	0.847561	-0.444812	2.73745	-0.162491	0.870919	NA	0	1.28369	0.879451	2.92222	0	0	Tshz3	ENSMUSG00000021217	teashirt zinc finger family member 3 [Source:MGI Symbol;Acc:MGI:2442819]
ENSMUST00000021645	0.427897	2.30122	4.01629	0.572971	0.566664	NA	0	2.56738	0	0	0	0	Dcaf4	ENSMUSG00000021222	DDB1 and CUL4 associated factor 4 [Source:MGI Symbol;Acc:MGI:1921078]
ENSMUST00000021649	1.12578	2.49535	2.21595	1.12609	0.260129	NA	0.977805	3.85107	0.879451	0	1.04637	0	Acot2	ENSMUSG00000021226	acyl-CoA thioesterase 2 [Source:MGI Symbol;Acc:MGI:2159605]
ENSMUST00000021652	0.905722	-3.25253	2.75086	-1.18237	0.23706	NA	0	0	0	0	3.1391	2.29524	Acot4	ENSMUSG00000052392	acyl-CoA thioesterase 4 [Source:MGI Symbol;Acc:MGI:2159621]
ENSMUST00000021667	1.17974	-0.563205	2.03281	-0.277057	0.781736	NA	1.95561	0	0.879451	1.94815	0	2.29524	Isca2	ENSMUSG00000021241	iron-sulfur cluster assembly 2 [Source:MGI Symbol;Acc:MGI:1921566]
ENSMUST00000021668	1.47044	-0.906225	1.70987	-0.529998	0.596113	NA	0	1.28369	1.7589	2.92222	2.09273	0.765079	Npc2	ENSMUSG00000021242	NPC intracellular cholesterol transporter 2 [Source:MGI Symbol;Acc:MGI:1915213]
ENSMUST00000021669	0.348788	-1.85356	4.02474	-0.460542	0.645127	NA	0	0	0	0	2.09273	0	Fcf1	ENSMUSG00000021243	FCF1 rRNA processing protein [Source:MGI Symbol;Acc:MGI:1920986]
ENSMUST00000021674	11.3896	-0.188715	0.546545	-0.345287	0.729878	0.880125	16.6227	8.98583	6.15616	7.7926	18.8346	9.94603	Fos	ENSMUSG00000021250	FBJ osteosarcoma oncogene [Source:MGI Symbol;Acc:MGI:95574]
ENSMUST00000021676	0.901309	-0.886181	2.30752	-0.384041	0.700948	NA	0.977805	0	0.879451	0.974075	1.04637	1.53016	Erg28	ENSMUSG00000021252	ergosterol biosynthesis 28 [Source:MGI Symbol;Acc:MGI:1915571]
ENSMUST00000021681	53.7326	0.847046	0.245331	3.45267	0.00055507	0.0055634	53.7793	80.8725	72.9945	37.0148	38.7155	39.0191	Vash1	ENSMUSG00000021256	vasohibin 1 [Source:MGI Symbol;Acc:MGI:2442543]
ENSMUST00000021682	308.356	-0.386784	0.113467	-3.40878	0.000652535	0.00641186	297.253	258.022	247.126	343.848	335.883	368.003	Angel1	ENSMUSG00000021257	angel homolog 1 [Source:MGI Symbol;Acc:MGI:1915987]
ENSMUST00000021684	6.14533	-0.0666389	0.718791	-0.0927097	0.926134	NA	8.80024	3.85107	5.27671	2.92222	8.37092	7.65079	Cyp46a1	ENSMUSG00000021259	cytochrome P450, family 46, subfamily a, polypeptide 1 [Source:MGI Symbol;Acc:MGI:1341877]
ENSMUST00000021685	7.33565	0.285784	0.6762	0.422632	0.672564	NA	9.77805	3.85107	10.5534	7.7926	2.09273	9.94603	Hhipl1	ENSMUSG00000021260	hedgehog interacting protein-like 1 [Source:MGI Symbol;Acc:MGI:1919265]
ENSMUST00000021691	1.05198	-0.142218	2.20037	-0.0646338	0.948466	NA	0	1.28369	1.7589	0.974075	0	2.29524	Degs2	ENSMUSG00000021263	delta(4)-desaturase, sphingolipid 2 [Source:MGI Symbol;Acc:MGI:1917309]
ENSMUST00000021692	99.7695	0.546685	0.188948	2.89331	0.0038121	0.0276464	99.7361	133.504	123.123	63.3149	87.8947	91.0445	Yy1	ENSMUSG00000021264	YY1 transcription factor [Source:MGI Symbol;Acc:MGI:99150]
ENSMUST00000021693	2.97475	-0.750428	1.10834	-0.677072	0.49836	NA	1.95561	0	4.39726	2.92222	6.27819	2.29524	Slc25a29	ENSMUSG00000021265	solute carrier family 25 (mitochondrial carrier, palmitoylcarnitine transporter), member 29 [Source:MGI Symbol;Acc:MGI:2444911]
ENSMUST00000021701	2.11336	-0.558519	1.43449	-0.389352	0.697016	NA	2.93341	1.28369	0.879451	6.81852	0	0.765079	Mok	ENSMUSG00000056458	MOK protein kinase [Source:MGI Symbol;Acc:MGI:1336881]
ENSMUST00000021707	9.23976	-0.375834	0.565399	-0.664723	0.506228	0.742989	9.77805	6.41845	7.91506	10.7148	8.37092	12.2413	Amn	ENSMUSG00000021278	amnionless [Source:MGI Symbol;Acc:MGI:1934943]
ENSMUST00000021714	0.29315	1.84622	4.0531	0.45551	0.648743	NA	0	0	1.7589	0	0	0	Zfyve21	ENSMUSG00000021286	zinc finger, FYVE domain containing 21 [Source:MGI Symbol;Acc:MGI:1915770]
ENSMUST00000021719	31.4343	1.21155	0.335137	3.61509	0.000300238	0.00331255	35.201	35.9433	59.8027	21.4296	20.9273	15.3016	Atp5mpl	ENSMUSG00000021290	ATP synthase membrane subunit 6.8PL [Source:MGI Symbol;Acc:MGI:1917507]
ENSMUST00000021729	4.07315	-0.446229	0.873682	-0.510745	0.60953	NA	2.93341	3.85107	3.51781	5.84445	5.23183	3.06032	Gpr132	ENSMUSG00000021298	G protein-coupled receptor 132 [Source:MGI Symbol;Acc:MGI:1890220]
ENSMUST00000021734	0.33674	-1.80881	4.02839	-0.449015	0.65342	NA	0	0	0	0.974075	1.04637	0	Gng4	ENSMUSG00000021303	guanine nucleotide binding protein (G protein), gamma 4 [Source:MGI Symbol;Acc:MGI:102703]
ENSMUST00000021757	0.579718	-2.61528	3.55005	-0.736686	0.461313	NA	0	0	0	1.94815	0	1.53016	Aoah	ENSMUSG00000021322	acyloxyacyl hydrolase [Source:MGI Symbol;Acc:MGI:1350928]
ENSMUST00000021770	7.75808	-0.402461	0.647852	-0.621223	0.534453	NA	7.82244	3.85107	7.91506	8.76667	13.6027	4.59048	Scgn	ENSMUSG00000021337	secretagogin, EF-hand calcium binding protein [Source:MGI Symbol;Acc:MGI:2384873]
ENSMUST00000021772	31.9591	-0.307551	0.310185	-0.991508	0.321438	0.590454	24.4451	32.0922	29.0219	39.9371	38.7155	27.5429	Mrs2	ENSMUSG00000021339	MRS2 magnesium transporter [Source:MGI Symbol;Acc:MGI:2685748]
ENSMUST00000021773	132.713	-0.208273	0.162952	-1.27813	0.201205	0.460066	139.826	114.248	114.329	162.67	141.259	123.943	Gpld1	ENSMUSG00000021340	glycosylphosphatidylinositol specific phospholipase D1 [Source:MGI Symbol;Acc:MGI:106604]
ENSMUST00000021790	3.58664	0.660689	0.965612	0.684218	0.493838	NA	3.91122	7.70214	1.7589	1.94815	3.1391	3.06032	Tmem14c	ENSMUSG00000021361	transmembrane protein 14C [Source:MGI Symbol;Acc:MGI:1913404]
ENSMUST00000021796	1.09035	1.2971	2.31102	0.561265	0.574617	NA	1.95561	0	2.63835	1.94815	0	0	Edn1	ENSMUSG00000021367	endothelin 1 [Source:MGI Symbol;Acc:MGI:95283]
ENSMUST00000021800	0.522869	1.11235	3.5324	0.3149	0.752838	NA	0	1.28369	0.879451	0.974075	0	0	Mcur1	ENSMUSG00000021371	mitochondrial calcium uniporter regulator 1 [Source:MGI Symbol;Acc:MGI:1923387]
ENSMUST00000021803	177.111	0.492158	0.143138	3.43836	0.000585259	0.00581607	236.629	184.851	199.635	150.008	133.935	157.606	Nup153	ENSMUSG00000021374	nucleoporin 153 [Source:MGI Symbol;Acc:MGI:2385621]
ENSMUST00000021806	0.324692	-1.763	4.03225	-0.437225	0.661948	NA	0	0	0	1.94815	0	0	Tpmt	ENSMUSG00000021376	thiopurine methyltransferase [Source:MGI Symbol;Acc:MGI:98812]
ENSMUST00000021810	10.3975	0.175892	0.544081	0.323283	0.746481	0.889406	12.7115	5.13476	14.9507	9.74075	8.37092	11.4762	Id4	ENSMUSG00000021379	inhibitor of DNA binding 4 [Source:MGI Symbol;Acc:MGI:99414]
ENSMUST00000021813	0.320969	0.167149	4.08047	0.0409631	0.967325	NA	0	0	0.879451	0	1.04637	0	Barx1	ENSMUSG00000021381	BarH-like homeobox 1 [Source:MGI Symbol;Acc:MGI:103124]
ENSMUST00000021818	19.7586	-0.451289	0.388805	-1.16071	0.245761	0.511831	14.6671	16.688	18.4685	26.3	24.0664	18.3619	Cenpp	ENSMUSG00000021391	centromere protein P [Source:MGI Symbol;Acc:MGI:1913586]
ENSMUST00000021820	1.09796	3.67922	2.30058	1.59926	0.109763	NA	0.977805	3.85107	1.7589	0	0	0	Aspn	ENSMUSG00000021388	asporin [Source:MGI Symbol;Acc:MGI:1913945]
ENSMUST00000021822	117.908	-0.415954	0.174787	-2.37978	0.0173229	0.0920823	107.559	94.993	99.378	161.696	132.888	110.937	Ogn	ENSMUSG00000021390	osteoglycin [Source:MGI Symbol;Acc:MGI:109278]
ENSMUST00000021828	0.957012	0.485234	2.51131	0.193219	0.846787	NA	0	2.56738	0.879451	0	0	2.29524	Nxnl2	ENSMUSG00000021396	nucleoredoxin-like 2 [Source:MGI Symbol;Acc:MGI:1922374]
ENSMUST00000021832	0.448483	-0.705943	3.79395	-0.186071	0.852389	NA	0	0	0.879451	0	1.04637	0.765079	Wrnip1	ENSMUSG00000021400	Werner helicase interacting protein 1 [Source:MGI Symbol;Acc:MGI:1926153]
ENSMUST00000021837	0.737439	3.10671	2.89258	1.07403	0.28281	NA	0.977805	2.56738	0.879451	0	0	0	Serpinb9c	ENSMUSG00000021404	serine (or cysteine) peptidase inhibitor, clade B, member 9c [Source:MGI Symbol;Acc:MGI:894669]
ENSMUST00000021844	0.29315	1.84622	4.0531	0.45551	0.648743	NA	0	0	1.7589	0	0	0	Ripk1	ENSMUSG00000021408	receptor (TNFRSF)-interacting serine-threonine kinase 1 [Source:MGI Symbol;Acc:MGI:108212]
ENSMUST00000021853	9.8804	-0.774121	0.569628	-1.35899	0.174148	0.422999	6.84463	10.2695	5.27671	11.6889	8.37092	16.8317	Eci3	ENSMUSG00000021416	enoyl-Coenzyme A delta isomerase 3 [Source:MGI Symbol;Acc:MGI:1916373]
ENSMUST00000021857	1.95683	0.324187	1.38175	0.234621	0.814503	NA	2.93341	0	3.51781	1.94815	1.04637	2.29524	Fars2	ENSMUSG00000021420	phenylalanine-tRNA synthetase 2 (mitochondrial) [Source:MGI Symbol;Acc:MGI:1917205]
ENSMUST00000021864	20.6633	0.219634	0.379035	0.579457	0.562281	0.781667	17.6005	28.2412	21.1068	18.5074	20.9273	17.5968	Ssr1	ENSMUSG00000021427	signal sequence receptor, alpha [Source:MGI Symbol;Acc:MGI:105082]
ENSMUST00000021866	1.68625	1.36993	1.56912	0.873057	0.382632	NA	2.93341	2.56738	1.7589	0	2.09273	0.765079	Riok1	ENSMUSG00000021428	RIO kinase 1 [Source:MGI Symbol;Acc:MGI:1918590]
ENSMUST00000021870	3.95606	2.08431	0.987779	2.11009	0.0348504	NA	8.80024	5.13476	5.27671	1.94815	1.04637	1.53016	Slc35b3	ENSMUSG00000021432	solute carrier family 35, member B3 [Source:MGI Symbol;Acc:MGI:1913978]
ENSMUST00000021903	0.602693	2.85176	3.49224	0.816598	0.414158	NA	0.977805	0	2.63835	0	0	0	Gadd45g	ENSMUSG00000021453	growth arrest and DNA-damage-inducible 45 gamma [Source:MGI Symbol;Acc:MGI:1346325]
ENSMUST00000021920	23.654	0.244426	0.359587	0.679741	0.496669	0.735243	32.2676	17.9717	26.3835	25.3259	17.7882	22.1873	Sptlc1	ENSMUSG00000021468	serine palmitoyltransferase, long chain base subunit 1 [Source:MGI Symbol;Acc:MGI:1099431]
ENSMUST00000021922	1.39164	-0.309392	1.75411	-0.176381	0.859994	NA	0.977805	0	2.63835	2.92222	1.04637	0.765079	Msx2	ENSMUSG00000021469	msh homeobox 2 [Source:MGI Symbol;Acc:MGI:97169]
ENSMUST00000021926	16.4973	0.54169	0.445377	1.21625	0.22389	0.489109	18.5783	12.8369	27.263	10.7148	10.4637	19.127	Ercc6l2	ENSMUSG00000021470	excision repair cross-complementing rodent repair deficiency, complementation group 6 like 2 [Source:MGI Symbol;Acc:MGI:1923501]
ENSMUST00000021930	1.70827	-0.0383117	1.53351	-0.024983	0.980069	NA	2.93341	1.28369	0.879451	0	2.09273	3.06032	Sfxn1	ENSMUSG00000021474	sideroflexin 1 [Source:MGI Symbol;Acc:MGI:2137677]
ENSMUST00000021937	18.8448	0.00849125	0.403508	0.0210436	0.983211	0.993648	18.5783	25.6738	13.1918	18.5074	15.6955	21.4222	Zfp346	ENSMUSG00000021481	zinc finger protein 346 [Source:MGI Symbol;Acc:MGI:1349417]
ENSMUST00000021939	0.500329	0.996334	3.92217	0.254027	0.799475	NA	1.95561	0	0	0	1.04637	0	Cdk20	ENSMUSG00000021483	cyclin-dependent kinase 20 [Source:MGI Symbol;Acc:MGI:2145349]
ENSMUST00000021940	10.7031	0.669083	0.531657	1.25849	0.208216	0.468001	13.6893	12.8369	13.1918	7.7926	5.23183	11.4762	Lman2	ENSMUSG00000021484	lectin, mannose-binding 2 [Source:MGI Symbol;Acc:MGI:1914140]
ENSMUST00000021941	2.75939	-0.37759	1.18741	-0.317996	0.750488	NA	0	3.85107	3.51781	0.974075	2.09273	6.12064	Mxd3	ENSMUSG00000021485	Max dimerization protein 3 [Source:MGI Symbol;Acc:MGI:104987]
ENSMUST00000021942	22.5514	-0.330664	0.365167	-0.905514	0.365193	0.634173	16.6227	19.2553	23.7452	30.1963	24.0664	21.4222	Prelid1	ENSMUSG00000021486	PRELI domain containing 1 [Source:MGI Symbol;Acc:MGI:1913744]
ENSMUST00000021948	34.0252	-0.507755	0.505684	-1.0041	0.315333	0.585959	14.6671	21.8227	47.4904	35.0667	37.6691	47.4349	F12	ENSMUSG00000021492	coagulation factor XII (Hageman factor) [Source:MGI Symbol;Acc:MGI:1891012]
ENSMUST00000021957	0.455496	0.884442	4.0531	0.218214	0.827262	NA	0	0	1.7589	0.974075	0	0	Fam193b	ENSMUSG00000021495	family with sequence similarity 193, member B [Source:MGI Symbol;Acc:MGI:2385851]
ENSMUST00000021959	2.00194	1.73774	1.429	1.21605	0.223965	NA	0.977805	3.85107	4.39726	0.974075	1.04637	0.765079	Txndc15	ENSMUSG00000021497	thioredoxin domain containing 15 [Source:MGI Symbol;Acc:MGI:1916922]
ENSMUST00000021963	0.990414	1.01316	2.33302	0.434268	0.664094	NA	0	1.28369	2.63835	0.974075	1.04637	0	Caml	ENSMUSG00000021501	calcium modulating ligand [Source:MGI Symbol;Acc:MGI:104728]
ENSMUST00000021968	12.094	-0.376248	0.534052	-0.704514	0.481112	0.725858	10.7559	17.9717	3.51781	12.663	14.6491	13.0064	Pitx1	ENSMUSG00000021506	paired-like homeodomain transcription factor 1 [Source:MGI Symbol;Acc:MGI:107374]
ENSMUST00000021971	0.731328	-2.94836	3.12005	-0.944971	0.344674	NA	0	0	0	0	2.09273	2.29524	Slc25a48	ENSMUSG00000021509	solute carrier family 25, member 48 [Source:MGI Symbol;Acc:MGI:2145373]
ENSMUST00000021990	46.4914	-0.161016	0.266935	-0.603202	0.546374	0.770201	59.6461	30.8086	40.4548	46.7556	52.3183	48.9651	Ptdss1	ENSMUSG00000021518	phosphatidylserine synthase 1 [Source:MGI Symbol;Acc:MGI:1276575]
ENSMUST00000021991	0.825642	0.588124	2.77221	0.21215	0.83199	NA	2.93341	0	0	0.974075	1.04637	0	Mterf3	ENSMUSG00000021519	mitochondrial transcription termination factor 3 [Source:MGI Symbol;Acc:MGI:1913660]
ENSMUST00000021997	1.3103	0.598433	2.05478	0.29124	0.770868	NA	0	1.28369	3.51781	0	0	3.06032	Rsl1	ENSMUSG00000058900	regulator of sex limited protein 1 [Source:MGI Symbol;Acc:MGI:3044162]
ENSMUST00000022007	0.701607	0.200794	3.04316	0.0659822	0.947392	NA	0.977805	1.28369	0	1.94815	0	0	1700001L19Rik	ENSMUSG00000021534	RIKEN cDNA 1700001L19 gene [Source:MGI Symbol;Acc:MGI:1916565]
ENSMUST00000022009	3.71102	0.382717	0.934163	0.40969	0.682034	NA	2.93341	6.41845	3.51781	1.94815	2.09273	5.35556	Cetn3	ENSMUSG00000021537	centrin 3 [Source:MGI Symbol;Acc:MGI:1097706]
ENSMUST00000022013	27.7226	-0.415129	0.330736	-1.25517	0.209418	0.469498	19.5561	20.539	30.7808	31.1704	31.391	32.8984	Adcy2	ENSMUSG00000021536	adenylate cyclase 2 [Source:MGI Symbol;Acc:MGI:99676]
ENSMUST00000022028	2.88632	-0.0323604	1.09185	-0.0296381	0.976356	NA	2.93341	3.85107	1.7589	4.87037	3.1391	0.765079	1700067P10Rik	ENSMUSG00000021545	RIKEN cDNA 1700067P10 gene [Source:MGI Symbol;Acc:MGI:1915474]
ENSMUST00000022030	2.54999	0.805971	1.18877	0.677988	0.497779	NA	3.91122	1.28369	4.39726	3.8963	1.04637	0.765079	Ccnh	ENSMUSG00000021548	cyclin H [Source:MGI Symbol;Acc:MGI:1913921]
ENSMUST00000022032	5.22381	-0.711853	0.864639	-0.823295	0.41034	NA	2.93341	6.41845	2.63835	13.637	4.18546	1.53016	2210016F16Rik	ENSMUSG00000021550	RIKEN cDNA 2210016F16 gene [Source:MGI Symbol;Acc:MGI:1917403]
ENSMUST00000022036	19.8041	-0.630155	0.391976	-1.60764	0.107915	0.316306	11.7337	19.2553	15.8301	23.3778	27.2055	21.4222	Slc28a3	ENSMUSG00000021553	solute carrier family 28 (sodium-coupled nucleoside transporter), member 3 [Source:MGI Symbol;Acc:MGI:2137361]
ENSMUST00000022038	13.4245	0.0476836	0.466058	0.102313	0.918508	0.962591	11.7337	15.4043	14.0712	10.7148	12.5564	16.0667	Naa35	ENSMUSG00000021555	N(alpha)-acetyltransferase 35, NatC auxiliary subunit [Source:MGI Symbol;Acc:MGI:1925939]
ENSMUST00000022039	33.1398	-0.939319	0.30603	-3.06937	0.00214512	0.0173943	21.5117	23.1064	23.7452	39.9371	40.8082	49.7302	Golm1	ENSMUSG00000021556	golgi membrane protein 1 [Source:MGI Symbol;Acc:MGI:1917329]
ENSMUST00000022040	2.2334	-0.916097	1.4036	-0.652675	0.513966	NA	0.977805	0	3.51781	5.84445	0	3.06032	Agtpbp1	ENSMUSG00000021557	ATP/GTP binding protein 1 [Source:MGI Symbol;Acc:MGI:2159437]
ENSMUST00000022051	1.00886	1.44721	2.44981	0.590746	0.554691	NA	1.95561	2.56738	0	0	0	1.53016	Nkd2	ENSMUSG00000021567	naked cuticle 2 [Source:MGI Symbol;Acc:MGI:1919543]
ENSMUST00000022053	3.01989	0.251183	1.04015	0.241488	0.809177	NA	4.88902	1.28369	3.51781	1.94815	4.18546	2.29524	Trip13	ENSMUSG00000021569	thyroid hormone receptor interactor 13 [Source:MGI Symbol;Acc:MGI:1916966]
ENSMUST00000022057	14.0786	-1.01303	0.479404	-2.1131	0.0345923	0.150999	12.7115	5.13476	9.67397	23.3778	16.7418	16.8317	Tppp	ENSMUSG00000021573	tubulin polymerization promoting protein [Source:MGI Symbol;Acc:MGI:1920198]
ENSMUST00000022059	4.85373	-0.158975	0.875977	-0.181483	0.855989	NA	6.84463	5.13476	1.7589	10.7148	3.1391	1.53016	Ahrr	ENSMUSG00000021575	aryl-hydrocarbon receptor repressor [Source:MGI Symbol;Acc:MGI:1333776]
ENSMUST00000022062	28.0007	-0.867898	0.333456	-2.60274	0.00924822	0.057339	23.4673	15.4043	20.2274	31.1704	38.7155	39.0191	Sdha	ENSMUSG00000021577	succinate dehydrogenase complex, subunit A, flavoprotein (Fp) [Source:MGI Symbol;Acc:MGI:1914195]
ENSMUST00000022063	9.09091	0.271175	0.582366	0.465644	0.641471	0.83104	14.6671	5.13476	9.67397	8.76667	9.41729	6.88572	Ccdc127	ENSMUSG00000021578	coiled-coil domain containing 127 [Source:MGI Symbol;Acc:MGI:1914683]
ENSMUST00000022064	28.1742	-0.171262	0.33033	-0.518456	0.60414	0.807937	20.5339	26.9575	31.6603	35.0667	30.3446	24.4825	Lrrc14b	ENSMUSG00000021579	leucine rich repeat containing 14B [Source:MGI Symbol;Acc:MGI:2145269]
ENSMUST00000022075	4.58194	-0.205272	0.858517	-0.239101	0.811027	NA	6.84463	1.28369	4.39726	8.76667	3.1391	3.06032	Pcsk1	ENSMUSG00000021587	proprotein convertase subtilisin/kexin type 1 [Source:MGI Symbol;Acc:MGI:97511]
ENSMUST00000022078	3.24298	0.187415	1.0435	0.179603	0.857465	NA	3.91122	3.85107	2.63835	0	5.23183	3.8254	Rhobtb3	ENSMUSG00000021589	Rho-related BTB domain containing 3 [Source:MGI Symbol;Acc:MGI:1920546]
ENSMUST00000022081	10.6894	1.04231	0.544	1.916	0.0553646	0.206761	18.5783	14.1206	10.5534	8.76667	5.23183	6.88572	Spata9	ENSMUSG00000021590	spermatogenesis associated 9 [Source:MGI Symbol;Acc:MGI:1922821]
ENSMUST00000022087	0.499086	-2.38227	3.86932	-0.615682	0.538104	NA	0	0	0	1.94815	1.04637	0	Nsun2	ENSMUSG00000021595	NOL1/NOP2/Sun domain family member 2 [Source:MGI Symbol;Acc:MGI:107252]
ENSMUST00000022098	0.325935	1.95736	4.04517	0.483876	0.628474	NA	1.95561	0	0	0	0	0	Mrpl36	ENSMUSG00000021607	mitochondrial ribosomal protein L36 [Source:MGI Symbol;Acc:MGI:2137228]
ENSMUST00000022100	1.25245	0.837504	1.99637	0.419514	0.67484	NA	0	1.28369	3.51781	1.94815	0	0.765079	Slc6a3	ENSMUSG00000021609	solute carrier family 6 (neurotransmitter transporter, dopamine), member 3 [Source:MGI Symbol;Acc:MGI:94862]
ENSMUST00000022102	37.3359	-0.806126	0.29945	-2.69202	0.00710202	0.0465451	21.5117	38.5107	22.8657	42.8593	43.9473	54.3206	Clptm1l	ENSMUSG00000021610	CLPTM1-like [Source:MGI Symbol;Acc:MGI:2442892]
ENSMUST00000022115	1.59187	-2.93704	1.95235	-1.50436	0.132489	NA	0.977805	0	0	0	6.27819	2.29524	Xrcc4	ENSMUSG00000021615	X-ray repair complementing defective repair in Chinese hamster cells 4 [Source:MGI Symbol;Acc:MGI:1333799]
ENSMUST00000022120	1.26969	1.6376	2.04093	0.802378	0.422334	NA	1.95561	3.85107	0	0	1.04637	0.765079	Acot12	ENSMUSG00000021620	acyl-CoA thioesterase 12 [Source:MGI Symbol;Acc:MGI:1921406]
ENSMUST00000022122	70.6944	0.941749	0.22632	4.16114	3.16662e-05	0.000447285	73.3354	106.546	100.257	52.6	35.5764	55.8508	Ckmt2	ENSMUSG00000021622	creatine kinase, mitochondrial 2 [Source:MGI Symbol;Acc:MGI:1923972]
ENSMUST00000022135	35.6592	0.411231	0.291962	1.40851	0.15898	0.400507	40.09	33.3759	48.3698	26.3	31.391	34.4286	Ak6	ENSMUSG00000078941	adenylate kinase 6 [Source:MGI Symbol;Acc:MGI:5510732]
ENSMUST00000022148	0.348788	-1.85356	4.02474	-0.460542	0.645127	NA	0	0	0	0	2.09273	0	Mccc2	ENSMUSG00000021646	methylcrotonoyl-Coenzyme A carboxylase 2 (beta) [Source:MGI Symbol;Acc:MGI:1925288]
ENSMUST00000022153	24.2361	-0.467698	0.380877	-1.22795	0.219465	0.482452	21.5117	30.8086	9.67397	26.3	30.3446	26.7778	Ptcd2	ENSMUSG00000021650	pentatricopeptide repeat domain 2 [Source:MGI Symbol;Acc:MGI:1916177]
ENSMUST00000022163	25.2244	0.239221	0.355245	0.673396	0.500695	0.739122	22.4895	26.9575	32.5397	14.6111	27.2055	27.5429	Btf3	ENSMUSG00000021660	basic transcription factor 3 [Source:MGI Symbol;Acc:MGI:1202875]
ENSMUST00000022169	17.232	0.219379	0.424432	0.516878	0.605242	0.808624	23.4673	16.688	15.8301	12.663	12.5564	22.1873	Hexb	ENSMUSG00000021665	hexosaminidase B [Source:MGI Symbol;Acc:MGI:96074]
ENSMUST00000022172	0.864953	2.1391	2.52778	0.846238	0.39742	NA	0.977805	2.56738	0.879451	0	0	0.765079	Polk	ENSMUSG00000021668	polymerase (DNA directed), kappa [Source:MGI Symbol;Acc:MGI:1349767]
ENSMUST00000022176	8.07048	-0.62069	0.642586	-0.965926	0.334081	NA	3.91122	6.41845	8.79451	13.637	4.18546	11.4762	Hmgcr	ENSMUSG00000021670	3-hydroxy-3-methylglutaryl-Coenzyme A reductase [Source:MGI Symbol;Acc:MGI:96159]
ENSMUST00000022182	17.3464	-1.74665	0.731537	-2.38764	0.0169567	0.090617	13.6893	3.85107	6.15616	42.8593	11.51	26.0127	F2rl2	ENSMUSG00000021675	coagulation factor II (thrombin) receptor-like 2 [Source:MGI Symbol;Acc:MGI:1298208]
ENSMUST00000022186	3.34844	0.0358813	0.96464	0.0371966	0.970328	NA	1.95561	3.85107	4.39726	2.92222	3.1391	3.8254	S100z	ENSMUSG00000021679	S100 calcium binding protein, zeta [Source:MGI Symbol;Acc:MGI:2685471]
ENSMUST00000022189	5.62544	-1.62629	0.80921	-2.00973	0.0444598	NA	4.88902	2.56738	0.879451	6.81852	9.41729	9.18095	Aggf1	ENSMUSG00000021681	angiogenic factor with G patch and FHA domains 1 [Source:MGI Symbol;Acc:MGI:1913799]
ENSMUST00000022196	101.389	0.243122	0.177173	1.37223	0.169993	0.416569	91.9137	119.383	118.726	91.563	94.1729	92.5746	Ap3b1	ENSMUSG00000021686	adaptor-related protein complex 3, beta 1 subunit [Source:MGI Symbol;Acc:MGI:1333879]
ENSMUST00000022197	2.30584	-0.23706	1.2366	-0.191703	0.847974	NA	2.93341	2.56738	0.879451	0.974075	4.18546	2.29524	Scamp1	ENSMUSG00000021687	secretory carrier membrane protein 1 [Source:MGI Symbol;Acc:MGI:1349480]
ENSMUST00000022204	14.0786	-0.251699	0.482817	-0.521313	0.602149	0.806472	19.5561	5.13476	13.1918	16.5593	17.7882	12.2413	Kif2a	ENSMUSG00000021693	kinesin family member 2A [Source:MGI Symbol;Acc:MGI:108390]
ENSMUST00000022207	0.464253	-2.28549	3.67161	-0.622477	0.533628	NA	0	0	0	0.974075	1.04637	0.765079	Elovl7	ENSMUSG00000021696	ELOVL family member 7, elongation of long chain fatty acids (yeast) [Source:MGI Symbol;Acc:MGI:1921809]
ENSMUST00000022212	2.36397	-2.64266	1.48903	-1.77475	0.0759384	NA	0.977805	0	0.879451	0.974075	5.23183	6.12064	Plk2	ENSMUSG00000021701	polo like kinase 2 [Source:MGI Symbol;Acc:MGI:1099790]
ENSMUST00000022217	9.09692	-0.372773	0.596795	-0.624625	0.532217	0.761272	3.91122	6.41845	13.1918	7.7926	12.5564	10.7111	Zfyve16	ENSMUSG00000021706	zinc finger, FYVE domain containing 16 [Source:MGI Symbol;Acc:MGI:2145181]
ENSMUST00000022218	7.00409	0.755599	0.663843	1.13822	0.255029	NA	5.86683	8.98583	11.4329	4.87037	6.27819	4.59048	Dhfr	ENSMUSG00000021707	dihydrofolate reductase [Source:MGI Symbol;Acc:MGI:94890]
ENSMUST00000022226	5.99856	-0.759742	0.740782	-1.02559	0.305083	NA	7.82244	3.85107	1.7589	6.81852	7.32456	8.41587	Ppwd1	ENSMUSG00000021713	peptidylprolyl isomerase domain and WD repeat containing 1 [Source:MGI Symbol;Acc:MGI:2443069]
ENSMUST00000022228	4.34435	-0.519683	0.854931	-0.607865	0.543277	NA	3.91122	1.28369	5.27671	6.81852	4.18546	4.59048	Cwc27	ENSMUSG00000021715	CWC27 spliceosome-associated protein [Source:MGI Symbol;Acc:MGI:1914535]
ENSMUST00000022232	5.73007	0.655793	0.740712	0.885355	0.375965	NA	5.86683	6.41845	8.79451	1.94815	5.23183	6.12064	4933425L06Rik	ENSMUSG00000021718	RIKEN cDNA 4933425L06 gene [Source:MGI Symbol;Acc:MGI:1914013]
ENSMUST00000022242	0.602693	2.85176	3.49224	0.816598	0.414158	NA	0.977805	0	2.63835	0	0	0	Emb	ENSMUSG00000021728	embigin [Source:MGI Symbol;Acc:MGI:95321]
ENSMUST00000022245	30.8558	0.867091	0.324254	2.67411	0.00749279	0.0486962	39.1122	42.3618	38.6959	13.637	23.02	28.3079	Mrps30	ENSMUSG00000021731	mitochondrial ribosomal protein S30 [Source:MGI Symbol;Acc:MGI:1926237]
ENSMUST00000022246	0.274088	0.167149	4.08047	0.0409631	0.967325	NA	0	0	0.879451	0	0	0.765079	Fgf10	ENSMUSG00000021732	fibroblast growth factor 10 [Source:MGI Symbol;Acc:MGI:1099809]
ENSMUST00000022256	7.68596	-0.0809819	0.683732	-0.118441	0.905718	NA	4.88902	8.98583	8.79451	11.6889	1.04637	10.7111	Psmd6	ENSMUSG00000021737	proteasome (prosome, macropain) 26S subunit, non-ATPase, 6 [Source:MGI Symbol;Acc:MGI:1913663]
ENSMUST00000022257	6.36727	0.121087	0.702707	0.172315	0.86319	NA	8.80024	3.85107	7.03561	9.74075	4.18546	4.59048	Atxn7	ENSMUSG00000021738	ataxin 7 [Source:MGI Symbol;Acc:MGI:2179277]
ENSMUST00000022264	1.26512	1.69135	1.94048	0.871616	0.383418	NA	0.977805	1.28369	3.51781	0	1.04637	0.765079	Ptprg	ENSMUSG00000021745	protein tyrosine phosphatase, receptor type, G [Source:MGI Symbol;Acc:MGI:97814]
ENSMUST00000022268	2.85358	-1.52447	1.1871	-1.2842	0.199072	NA	0	3.85107	0.879451	3.8963	3.1391	5.35556	Pdhb	ENSMUSG00000021748	pyruvate dehydrogenase (lipoamide) beta [Source:MGI Symbol;Acc:MGI:1915513]
ENSMUST00000022269	42.5861	-0.69114	0.276353	-2.50093	0.0123866	0.0716602	24.4451	30.8086	42.2137	49.6778	50.2255	58.146	Oit1	ENSMUSG00000021749	oncoprotein induced transcript 1 [Source:MGI Symbol;Acc:MGI:1201784]
ENSMUST00000022281	446.051	0.288387	0.0954344	3.02184	0.00251244	0.0197556	492.814	462.128	514.479	412.034	403.897	390.956	Mtrex	ENSMUSG00000016018	Mtr4 exosome RNA helicase [Source:MGI Symbol;Acc:MGI:1919448]
ENSMUST00000022282	0.924784	-2.06588	2.58081	-0.800475	0.423436	NA	0	0	0.879451	0	3.1391	1.53016	Gpx8	ENSMUSG00000021760	glutathione peroxidase 8 (putative) [Source:MGI Symbol;Acc:MGI:1916840]
ENSMUST00000022286	0.301907	-1.66764	4.04066	-0.412715	0.679815	NA	0	0	0	0	1.04637	0.765079	Ndufs4	ENSMUSG00000021764	NADH:ubiquinone oxidoreductase core subunit S4 [Source:MGI Symbol;Acc:MGI:1343135]
ENSMUST00000022293	1.13891	0.433757	3.88483	0.111654	0.911098	NA	3.91122	0	0	2.92222	0	0	Vdac2	ENSMUSG00000021771	voltage-dependent anion channel 2 [Source:MGI Symbol;Acc:MGI:106915]
ENSMUST00000022296	1.28555	-0.709731	1.86095	-0.38138	0.702921	NA	1.95561	0	0.879451	0.974075	3.1391	0.765079	Ube2e1	ENSMUSG00000021774	ubiquitin-conjugating enzyme E2E 1 [Source:MGI Symbol;Acc:MGI:107411]
ENSMUST00000022310	0.859609	-0.473131	2.53112	-0.186926	0.851719	NA	0	1.28369	0.879451	1.94815	1.04637	0	Ngly1	ENSMUSG00000021785	N-glycanase 1 [Source:MGI Symbol;Acc:MGI:1913276]
ENSMUST00000022311	243.941	0.512994	0.122348	4.1929	2.75411e-05	0.000397022	290.408	261.873	306.049	206.504	211.366	187.444	Oxsm	ENSMUSG00000021786	3-oxoacyl-ACP synthase, mitochondrial [Source:MGI Symbol;Acc:MGI:1918397]
ENSMUST00000022316	125.166	0.957094	0.166396	5.75189	8.82495e-09	2.12466e-07	151.56	175.865	167.975	100.33	79.5237	75.7429	Dydc2	ENSMUSG00000021791	DPY30 domain containing 2 [Source:MGI Symbol;Acc:MGI:1918450]
ENSMUST00000022322	7.31361	-0.0936681	0.638314	-0.146743	0.883335	NA	6.84463	6.41845	7.91506	4.87037	9.41729	8.41587	Glud1	ENSMUSG00000021794	glutamate dehydrogenase 1 [Source:MGI Symbol;Acc:MGI:95753]
ENSMUST00000022337	2.54478	0.61984	1.16065	0.534044	0.593311	NA	2.93341	3.85107	2.63835	0.974075	1.04637	3.8254	Cdhr1	ENSMUSG00000021803	cadherin-related family member 1 [Source:MGI Symbol;Acc:MGI:2157782]
ENSMUST00000022341	94.1754	0.265223	0.182815	1.45077	0.146843	0.38195	98.7583	111.681	99.378	79.8741	77.431	97.9302	Rtraf	ENSMUSG00000021807	RNA transcription, translation and transport factor [Source:MGI Symbol;Acc:MGI:1915295]
ENSMUST00000022344	23.5816	-0.35984	0.365099	-0.985594	0.324332	0.593293	15.6449	24.3901	21.9863	20.4556	34.53	24.4825	Ecd	ENSMUSG00000021810	ecdysoneless cell cycle regulator [Source:MGI Symbol;Acc:MGI:1917851]
ENSMUST00000022345	1.56061	-0.681535	1.73592	-0.392607	0.69461	NA	0	0	3.51781	0.974075	1.04637	3.8254	Dnajc9	ENSMUSG00000021811	DnaJ heat shock protein family (Hsp40) member C9 [Source:MGI Symbol;Acc:MGI:1915326]
ENSMUST00000022353	5.7375	-0.0525317	1.35021	-0.0389063	0.968965	NA	5.86683	1.28369	9.67397	10.7148	0	6.88572	Mss51	ENSMUSG00000021815	MSS51 mitochondrial translational activator [Source:MGI Symbol;Acc:MGI:1922093]
ENSMUST00000022356	2.85778	-2.27265	1.29953	-1.74882	0.0803228	NA	0.977805	0	1.7589	9.74075	3.1391	1.53016	Usp54	ENSMUSG00000034235	ubiquitin specific peptidase 54 [Source:MGI Symbol;Acc:MGI:1926037]
ENSMUST00000022368	1.03292	-0.968347	2.27559	-0.425537	0.670445	NA	0	1.28369	0.879451	0.974075	0	3.06032	Plau	ENSMUSG00000021822	plasminogen activator, urokinase [Source:MGI Symbol;Acc:MGI:97611]
ENSMUST00000022369	30.9336	-0.625684	0.329803	-1.89715	0.0578086	0.21305	25.4229	20.539	26.3835	27.2741	52.3183	33.6635	Vcl	ENSMUSG00000021823	vinculin [Source:MGI Symbol;Acc:MGI:98927]
ENSMUST00000022378	1.66456	-2.98286	1.80943	-1.64851	0.0992486	NA	0	1.28369	0	0.974075	3.1391	4.59048	Ero1l	ENSMUSG00000021831	ERO1-like (S. cerevisiae) [Source:MGI Symbol;Acc:MGI:1354385]
ENSMUST00000022380	2.63182	-1.57088	1.35941	-1.15555	0.247864	NA	2.93341	0	0.879451	7.7926	4.18546	0	Psmc6	ENSMUSG00000021832	proteasome (prosome, macropain) 26S subunit, ATPase, 6 [Source:MGI Symbol;Acc:MGI:1914339]
ENSMUST00000022398	0.662053	-1.41434	3.11761	-0.453662	0.650072	NA	0.977805	0	0	1.94815	1.04637	0	ccdc198	ENSMUSG00000021850	coiled-coil domain containing 198 [Source:MGI Symbol;Acc:MGI:1914332]
ENSMUST00000022427	2.68023	0.360718	1.27322	0.283311	0.776938	NA	3.91122	5.13476	0	3.8963	3.1391	0	4933413J09Rik	ENSMUSG00000021874	RIKEN cDNA 4933413J09 gene [Source:MGI Symbol;Acc:MGI:1918356]
ENSMUST00000022429	3.45015	-0.067233	0.991856	-0.067785	0.945957	NA	2.93341	2.56738	4.39726	1.94815	7.32456	1.53016	Arf4	ENSMUSG00000021877	ADP-ribosylation factor 4 [Source:MGI Symbol;Acc:MGI:99433]
ENSMUST00000022433	210.896	-0.279108	0.128704	-2.16861	0.0301127	0.136294	194.583	206.674	172.372	225.011	224.968	241.765	Dnah12	ENSMUSG00000021879	dynein, axonemal, heavy chain 12 [Source:MGI Symbol;Acc:MGI:107720]
ENSMUST00000022446	67.0134	-0.0886154	0.213247	-0.415553	0.677737	0.851852	66.4907	61.6171	65.9589	66.2371	80.5701	61.2064	Eaf1	ENSMUSG00000021890	ELL associated factor 1 [Source:MGI Symbol;Acc:MGI:1921677]
ENSMUST00000022450	19.4115	-0.342041	0.389634	-0.877851	0.380025	0.644935	18.5783	14.1206	18.4685	25.3259	17.7882	22.1873	Tasor	ENSMUSG00000040651	transcription activation suppressor [Source:MGI Symbol;Acc:MGI:1921694]
ENSMUST00000022460	0.951912	-2.08364	2.3988	-0.868616	0.385057	NA	0.977805	0	0	2.92222	1.04637	0.765079	Galnt15	ENSMUSG00000021903	polypeptide N-acetylgalactosaminyltransferase 15 [Source:MGI Symbol;Acc:MGI:1926004]
ENSMUST00000022467	9.77791	0.0350382	0.580388	0.0603703	0.951861	0.978682	8.80024	3.85107	16.7096	9.74075	7.32456	12.2413	Gm6768	ENSMUSG00000021908	predicted gene 6768 [Source:MGI Symbol;Acc:MGI:3648259]
ENSMUST00000022476	0.325935	1.95736	4.04517	0.483876	0.628474	NA	1.95561	0	0	0	0	0	Glt8d1	ENSMUSG00000021916	glycosyltransferase 8 domain containing 1 [Source:MGI Symbol;Acc:MGI:1923735]
ENSMUST00000022494	0.97594	0.0374323	2.67955	0.0139696	0.988854	NA	2.93341	0	0	2.92222	0	0	Ebpl	ENSMUSG00000021928	emopamil binding protein-like [Source:MGI Symbol;Acc:MGI:1915427]
ENSMUST00000022496	7.46146	0.0303799	0.732115	0.041496	0.9669	NA	5.86683	2.56738	14.0712	9.74075	1.04637	11.4762	Kpna3	ENSMUSG00000021929	karyopherin (importin) alpha 3 [Source:MGI Symbol;Acc:MGI:1100863]
ENSMUST00000022497	8.48513	-0.21794	0.60162	-0.362256	0.717161	NA	8.80024	7.70214	7.03561	4.87037	12.5564	9.94603	Spryd7	ENSMUSG00000021930	SPRY domain containing 7 [Source:MGI Symbol;Acc:MGI:1913924]
ENSMUST00000022499	0.301907	-1.66764	4.04066	-0.412715	0.679815	NA	0	0	0	0	1.04637	0.765079	Rnaseh2b	ENSMUSG00000021932	ribonuclease H2, subunit B [Source:MGI Symbol;Acc:MGI:1914403]
ENSMUST00000022507	1.91479	-2.25632	1.63097	-1.38342	0.166535	NA	1.95561	0	0	3.8963	1.04637	4.59048	Pspc1	ENSMUSG00000021938	paraspeckle protein 1 [Source:MGI Symbol;Acc:MGI:1913895]
ENSMUST00000022508	8.68625	0.123225	0.585103	0.210604	0.833196	NA	6.84463	8.98583	11.4329	6.81852	7.32456	10.7111	Ptpn20	ENSMUSG00000021940	protein tyrosine phosphatase, non-receptor type 20 [Source:MGI Symbol;Acc:MGI:1196295]
ENSMUST00000022511	8.69606	-1.16577	0.665859	-1.75077	0.0799854	NA	3.91122	0	11.4329	14.6111	11.51	10.7111	Zmym2	ENSMUSG00000021945	zinc finger, MYM-type 2 [Source:MGI Symbol;Acc:MGI:1923257]
ENSMUST00000022517	0.62989	-0.1085	3.21464	-0.0337518	0.973075	NA	0	0	1.7589	0.974075	1.04637	0	Cryl1	ENSMUSG00000021947	crystallin, lambda 1 [Source:MGI Symbol;Acc:MGI:1915881]
ENSMUST00000022522	4.31883	0.130158	0.848556	0.153388	0.878093	NA	3.91122	5.13476	4.39726	3.8963	6.27819	2.29524	Tdh	ENSMUSG00000021953	L-threonine dehydrogenase [Source:MGI Symbol;Acc:MGI:1926231]
ENSMUST00000022528	5.85862	0.270589	0.735792	0.367752	0.713058	NA	6.84463	8.98583	3.51781	7.7926	4.18546	3.8254	Pinx1	ENSMUSG00000021958	PIN2/TERF1 interacting, telomerase inhibitor 1 [Source:MGI Symbol;Acc:MGI:1919650]
ENSMUST00000022531	7.57868	-0.0747988	0.632637	-0.118233	0.905883	NA	7.82244	6.41845	7.91506	10.7148	4.18546	8.41587	Lats2	ENSMUSG00000021959	large tumor suppressor 2 [Source:MGI Symbol;Acc:MGI:1354386]
ENSMUST00000022535	2.49653	0.145517	1.26385	0.115137	0.908336	NA	0.977805	5.13476	1.7589	2.92222	4.18546	0	Dcp1a	ENSMUSG00000021962	decapping mRNA 1A [Source:MGI Symbol;Acc:MGI:1923151]
ENSMUST00000022536	3.39675	-0.377307	1.0721	-0.351931	0.72489	NA	6.84463	0	1.7589	2.92222	7.32456	1.53016	Ska3	ENSMUSG00000021965	spindle and kinetochore associated complex subunit 3 [Source:MGI Symbol;Acc:MGI:3041235]
ENSMUST00000022537	233.594	1.08869	0.13187	8.25579	1.50904e-16	6.91e-15	292.364	331.192	328.915	173.385	143.352	132.359	Prss52	ENSMUSG00000021966	protease, serine 52 [Source:MGI Symbol;Acc:MGI:1920632]
ENSMUST00000022538	1.95413	-0.119916	1.49646	-0.0801333	0.936131	NA	1.95561	3.85107	0	0	2.09273	3.8254	Mrpl57	ENSMUSG00000021967	mitochondrial ribosomal protein L57 [Source:MGI Symbol;Acc:MGI:1915090]
ENSMUST00000022543	0.575996	-1.22487	3.3352	-0.367255	0.713429	NA	0	0	0.879451	0	1.04637	1.53016	Micu2	ENSMUSG00000021973	mitochondrial calcium uptake 2 [Source:MGI Symbol;Acc:MGI:1915764]
ENSMUST00000022544	5.97747	1.53322	0.762658	2.01036	0.0443926	NA	7.82244	12.8369	6.15616	3.8963	2.09273	3.06032	Hmbox1	ENSMUSG00000021972	homeobox containing 1 [Source:MGI Symbol;Acc:MGI:2445066]
ENSMUST00000022548	0.602072	1.44579	3.55315	0.406905	0.684078	NA	0	0	2.63835	0.974075	0	0	1700129C05Rik	ENSMUSG00000021977	RIKEN cDNA 1700129C05 gene [Source:MGI Symbol;Acc:MGI:1915182]
ENSMUST00000022553	8.10175	-0.161941	0.609363	-0.265755	0.790428	NA	7.82244	5.13476	9.67397	6.81852	11.51	7.65079	Cab39l	ENSMUSG00000021981	calcium binding protein 39-like [Source:MGI Symbol;Acc:MGI:1914081]
ENSMUST00000022561	1.61149	0.0397066	1.6184	0.0245345	0.980426	NA	3.91122	0	0.879451	0.974075	3.1391	0.765079	Amer2	ENSMUSG00000021986	APC membrane recruitment 2 [Source:MGI Symbol;Acc:MGI:1919375]
ENSMUST00000022567	0.93795	-0.370037	2.75504	-0.134313	0.893155	NA	0	2.56738	0	0	0	3.06032	Cacna2d3	ENSMUSG00000021991	calcium channel, voltage-dependent, alpha2/delta subunit 3 [Source:MGI Symbol;Acc:MGI:1338890]
ENSMUST00000022574	246.388	0.286046	0.129235	2.21339	0.0268711	0.126263	268.896	306.802	237.452	241.571	223.922	199.686	Lrrc63	ENSMUSG00000021997	leucine rich repeat containing 63 [Source:MGI Symbol;Acc:MGI:1918109]
ENSMUST00000022580	11.06	-0.113431	0.519437	-0.218374	0.827138	0.923642	13.6893	6.41845	11.4329	9.74075	13.6027	11.4762	Slc25a30	ENSMUSG00000022003	solute carrier family 25, member 30 [Source:MGI Symbol;Acc:MGI:1914804]
ENSMUST00000022585	10.7553	-0.219407	0.520403	-0.421609	0.67331	0.848998	7.82244	11.5532	10.5534	12.663	10.4637	11.4762	Gpalpp1	ENSMUSG00000022008	GPALPP motifs containing 1 [Source:MGI Symbol;Acc:MGI:1914717]
ENSMUST00000022586	7.25254	0.712786	0.672583	1.05977	0.289247	NA	11.7337	3.85107	11.4329	3.8963	4.18546	8.41587	Nufip1	ENSMUSG00000022009	nuclear fragile X mental retardation protein interacting protein 1 [Source:MGI Symbol;Acc:MGI:1351474]
ENSMUST00000022591	5.76242	-0.825397	0.750957	-1.09913	0.271713	NA	3.91122	5.13476	3.51781	3.8963	10.4637	7.65079	Epsti1	ENSMUSG00000022014	epithelial stromal interaction 1 (breast) [Source:MGI Symbol;Acc:MGI:1915168]
ENSMUST00000022595	95.1036	-0.243708	0.192428	-1.26649	0.205339	0.464816	94.8471	78.3051	87.0657	83.7704	128.703	97.9302	Rgcc	ENSMUSG00000022018	regulator of cell cycle [Source:MGI Symbol;Acc:MGI:1913464]
ENSMUST00000022600	0.325935	1.95736	4.04517	0.483876	0.628474	NA	1.95561	0	0	0	0	0	Mtrf1	ENSMUSG00000022022	mitochondrial translational release factor 1 [Source:MGI Symbol;Acc:MGI:2384815]
ENSMUST00000022601	8.52071	-0.177188	0.606455	-0.29217	0.770157	NA	9.77805	6.41845	7.91506	4.87037	8.37092	13.7714	Wbp4	ENSMUSG00000022023	WW domain binding protein 4 [Source:MGI Symbol;Acc:MGI:109568]
ENSMUST00000022610	11.0004	0.307906	0.517384	0.595122	0.551762	0.773681	13.6893	10.2695	12.3123	12.663	9.41729	7.65079	Scara5	ENSMUSG00000022032	scavenger receptor class A, member 5 [Source:MGI Symbol;Acc:MGI:1918395]
ENSMUST00000022612	31.1592	-0.258536	0.332917	-0.776576	0.437409	0.692853	33.2454	19.2553	32.5397	27.2741	27.2055	47.4349	Pbk	ENSMUSG00000022033	PDZ binding kinase [Source:MGI Symbol;Acc:MGI:1289156]
ENSMUST00000022614	2.06894	-1.54218	1.51167	-1.02018	0.307641	NA	0.977805	1.28369	0.879451	1.94815	7.32456	0	Ccdc25	ENSMUSG00000022035	coiled-coil domain containing 25 [Source:MGI Symbol;Acc:MGI:1914429]
ENSMUST00000022616	49.9318	0.441321	0.25154	1.75448	0.0793489	0.263344	44.0012	68.0356	60.6822	42.8593	44.9937	39.0191	Clu	ENSMUSG00000022037	clusterin [Source:MGI Symbol;Acc:MGI:88423]
ENSMUST00000022618	119.435	-0.251074	0.169504	-1.48123	0.138545	0.370192	105.603	127.085	96.7397	117.863	122.425	146.895	Adam2	ENSMUSG00000022039	a disintegrin and metallopeptidase domain 2 [Source:MGI Symbol;Acc:MGI:1340894]
ENSMUST00000022620	1.585	1.17666	1.73362	0.67873	0.497309	NA	0.977805	3.85107	1.7589	2.92222	0	0	Chrna2	ENSMUSG00000022041	cholinergic receptor, nicotinic, alpha polypeptide 2 (neuronal) [Source:MGI Symbol;Acc:MGI:87886]
ENSMUST00000022623	21.3606	0.114656	0.389397	0.294445	0.768418	0.897555	24.4451	26.9575	15.8301	12.663	23.02	25.2476	Trim35	ENSMUSG00000022043	tripartite motif-containing 35 [Source:MGI Symbol;Acc:MGI:1914104]
ENSMUST00000022629	13.612	-0.0887395	0.470049	-0.188788	0.850259	0.93354	16.6227	7.70214	14.9507	15.5852	11.51	15.3016	Dpysl2	ENSMUSG00000022048	dihydropyrimidinase-like 2 [Source:MGI Symbol;Acc:MGI:1349763]
ENSMUST00000022639	1.23817	3.89255	2.27556	1.71059	0.0871575	NA	3.91122	0	3.51781	0	0	0	Nefl	ENSMUSG00000022055	neurofilament, light polypeptide [Source:MGI Symbol;Acc:MGI:97313]
ENSMUST00000022646	0.849426	3.32838	2.66964	1.24675	0.212489	NA	2.93341	1.28369	0.879451	0	0	0	Nkx3-1	ENSMUSG00000022061	NK3 homeobox 1 [Source:MGI Symbol;Acc:MGI:97352]
ENSMUST00000022660	1.48991	0.773511	1.75441	0.440896	0.659289	NA	3.91122	0	1.7589	0.974075	0	2.29524	Loxl2	ENSMUSG00000034205	lysyl oxidase-like 2 [Source:MGI Symbol;Acc:MGI:2137913]
ENSMUST00000022663	0.959925	1.18625	2.23634	0.530441	0.595806	NA	0.977805	1.28369	1.7589	0.974075	0	0.765079	Tnfrsf10b	ENSMUSG00000022074	tumor necrosis factor receptor superfamily, member 10b [Source:MGI Symbol;Acc:MGI:1341090]
ENSMUST00000022665	10.8628	-1.07568	0.575773	-1.86824	0.0617289	0.223039	7.82244	10.2695	3.51781	15.5852	7.32456	20.6571	Rhobtb2	ENSMUSG00000022075	Rho-related BTB domain containing 2 [Source:MGI Symbol;Acc:MGI:2180557]
ENSMUST00000022666	1.48621	-1.67377	1.78189	-0.939323	0.347565	NA	0	1.28369	0.879451	3.8963	2.09273	0.765079	Klhl1	ENSMUSG00000022076	kelch-like 1 [Source:MGI Symbol;Acc:MGI:2136335]
ENSMUST00000022678	446.597	0.0648091	0.0944771	0.685977	0.492728	0.733542	442.946	481.384	446.761	426.645	445.752	436.095	Pebp4	ENSMUSG00000022085	phosphatidylethanolamine binding protein 4 [Source:MGI Symbol;Acc:MGI:1920773]
ENSMUST00000022680	17.3755	-0.261301	0.416266	-0.627725	0.530184	0.75955	14.6671	15.4043	17.589	18.5074	13.6027	24.4825	Bin3	ENSMUSG00000022089	bridging integrator 3 [Source:MGI Symbol;Acc:MGI:1929883]
ENSMUST00000022690	68.9661	0.0265575	0.221525	0.119885	0.904574	0.958753	74.3132	79.5888	55.4054	82.7964	62.7819	58.9111	Fam160b2	ENSMUSG00000022095	family with sequence similarity 160, member B2 [Source:MGI Symbol;Acc:MGI:3036290]
ENSMUST00000022694	0.951291	-3.31672	2.51346	-1.31958	0.186975	NA	0	0	0	3.8963	1.04637	0.765079	Dmtn	ENSMUSG00000022099	dematin actin binding protein [Source:MGI Symbol;Acc:MGI:99670]
ENSMUST00000022695	38.6159	0.727655	0.322103	2.25908	0.0238787	0.115626	26.4007	65.4682	52.7671	23.3778	37.6691	26.0127	Dmtn	ENSMUSG00000022099	dematin actin binding protein [Source:MGI Symbol;Acc:MGI:99670]
ENSMUST00000022697	3.6405	0.215065	0.963001	0.223328	0.82328	NA	1.95561	6.41845	3.51781	5.84445	1.04637	3.06032	Fgf17	ENSMUSG00000022101	fibroblast growth factor 17 [Source:MGI Symbol;Acc:MGI:1202401]
ENSMUST00000022698	11.0183	0.17113	0.548465	0.312016	0.755028	0.890983	10.7559	17.9717	7.03561	8.76667	6.27819	15.3016	Dok2	ENSMUSG00000022102	docking protein 2 [Source:MGI Symbol;Acc:MGI:1332623]
ENSMUST00000022701	14.5709	1.67671	0.492063	3.40752	0.00065556	0.00643256	15.6449	25.6738	25.5041	8.76667	4.18546	7.65079	Rb1	ENSMUSG00000022105	RB transcriptional corepressor 1 [Source:MGI Symbol;Acc:MGI:97874]
ENSMUST00000022704	3.70306	0.266277	0.925524	0.287704	0.773573	NA	6.84463	2.56738	2.63835	2.92222	4.18546	3.06032	Itm2b	ENSMUSG00000022108	integral membrane protein 2B [Source:MGI Symbol;Acc:MGI:1309517]
ENSMUST00000022708	9.31358	-0.604412	0.579398	-1.04317	0.296869	0.570217	6.84463	10.2695	5.27671	14.6111	10.4637	8.41587	Trim52	ENSMUSG00000022113	tripartite motif-containing 52 [Source:MGI Symbol;Acc:MGI:3045276]
ENSMUST00000022711	1.13727	-2.41725	2.18668	-1.10544	0.268967	NA	0.977805	0	0	0.974075	1.04637	3.8254	4930449E01Rik	ENSMUSG00000022116	RIKEN cDNA 4930449E01 gene [Source:MGI Symbol;Acc:MGI:1922114]
ENSMUST00000022715	1.67215	1.4848	1.69661	0.875155	0.381489	NA	4.88902	2.56738	0	0	1.04637	1.53016	Rbm26	ENSMUSG00000022119	RNA binding motif protein 26 [Source:MGI Symbol;Acc:MGI:1921463]
ENSMUST00000022716	9.55153	-0.549608	0.584785	-0.939845	0.347297	0.616598	4.88902	8.98583	9.67397	7.7926	8.37092	17.5968	Rnf219	ENSMUSG00000022120	ring finger protein 219 [Source:MGI Symbol;Acc:MGI:1919736]
ENSMUST00000022721	7.58642	-0.37987	0.669089	-0.567742	0.57021	NA	2.93341	12.8369	4.39726	8.76667	10.4637	6.12064	Cln5	ENSMUSG00000022125	ceroid-lipofuscinosis, neuronal 5 [Source:MGI Symbol;Acc:MGI:2442253]
ENSMUST00000022722	0.417372	-2.14718	4.0033	-0.536353	0.591715	NA	0	0	0	0.974075	0	1.53016	Acod1	ENSMUSG00000022126	aconitate decarboxylase 1 [Source:MGI Symbol;Acc:MGI:103206]
ENSMUST00000022725	2.83426	-0.116144	1.08144	-0.107398	0.914474	NA	3.91122	2.56738	1.7589	3.8963	1.04637	3.8254	Dct	ENSMUSG00000022129	dopachrome tautomerase [Source:MGI Symbol;Acc:MGI:102563]
ENSMUST00000022728	27.1316	-0.206298	0.342821	-0.601765	0.547331	0.770774	17.6005	28.2412	29.9014	21.4296	33.4837	32.1333	Gpr180	ENSMUSG00000022131	G protein-coupled receptor 180 [Source:MGI Symbol;Acc:MGI:1930949]
ENSMUST00000022734	36.7447	-0.0905023	0.302135	-0.299542	0.764526	0.895248	43.0234	33.3759	30.7808	25.3259	39.7619	48.2	Dnajc3	ENSMUSG00000022136	DnaJ heat shock protein family (Hsp40) member C3 [Source:MGI Symbol;Acc:MGI:107373]
ENSMUST00000022744	1.48842	-0.368322	1.75583	-0.20977	0.833847	NA	0	1.28369	2.63835	1.94815	0	3.06032	Gdnf	ENSMUSG00000022144	glial cell line derived neurotrophic factor [Source:MGI Symbol;Acc:MGI:107430]
ENSMUST00000022746	3.86842	2.04261	1.07735	1.89596	0.057965	NA	0.977805	8.98583	8.79451	2.92222	0	1.53016	Osmr	ENSMUSG00000022146	oncostatin M receptor [Source:MGI Symbol;Acc:MGI:1330819]
ENSMUST00000022749	0.308921	0.167149	4.08047	0.0409631	0.967325	NA	0	0	0.879451	0.974075	0	0	C9	ENSMUSG00000022149	complement component 9 [Source:MGI Symbol;Acc:MGI:1098282]
ENSMUST00000022757	3.57984	-0.28365	0.96691	-0.293357	0.769249	NA	3.91122	5.13476	0.879451	4.87037	2.09273	4.59048	Gzmf	ENSMUSG00000015441	granzyme F [Source:MGI Symbol;Acc:MGI:109254]
ENSMUST00000022765	16.5158	-0.0933782	0.448007	-0.20843	0.834893	0.927865	24.4451	12.8369	10.5534	11.6889	21.9737	17.5968	Rab2b	ENSMUSG00000022159	RAB2B, member RAS oncogene family [Source:MGI Symbol;Acc:MGI:1923588]
ENSMUST00000022766	59.9277	-0.349661	0.238489	-1.46615	0.142607	0.375602	48.8902	66.7519	43.0931	74.0297	73.2456	53.5556	Tox4	ENSMUSG00000016831	TOX high mobility group box family member 4 [Source:MGI Symbol;Acc:MGI:1915389]
ENSMUST00000022781	9.36122	-1.17862	0.592353	-1.98972	0.0466214	0.184098	3.91122	5.13476	7.91506	14.6111	14.6491	9.94603	Dad1	ENSMUSG00000022174	defender against cell death 1 [Source:MGI Symbol;Acc:MGI:101912]
ENSMUST00000022782	5.66539	0.035429	0.781498	0.0453348	0.96384	NA	0.977805	6.41845	9.67397	6.81852	6.27819	3.8254	Lrp10	ENSMUSG00000022175	low-density lipoprotein receptor-related protein 10 [Source:MGI Symbol;Acc:MGI:1929480]
ENSMUST00000022784	14.633	0.152886	0.453514	0.337114	0.736031	0.884154	20.5339	14.1206	11.4329	15.5852	14.6491	11.4762	Haus4	ENSMUSG00000022177	HAUS augmin-like complex, subunit 4 [Source:MGI Symbol;Acc:MGI:1261794]
ENSMUST00000022786	1.61391	0.626616	1.61888	0.387068	0.698706	NA	0.977805	1.28369	3.51781	0	3.1391	0.765079	4931414P19Rik	ENSMUSG00000022179	RIKEN cDNA 4931414P19 gene [Source:MGI Symbol;Acc:MGI:1921609]
ENSMUST00000022787	1.42337	0.935422	1.82758	0.511837	0.608765	NA	1.95561	0	3.51781	0.974075	2.09273	0	Slc7a8	ENSMUSG00000022180	solute carrier family 7 (cationic amino acid transporter, y+ system), member 8 [Source:MGI Symbol;Acc:MGI:1355323]
ENSMUST00000022791	11.0839	0.32827	0.5114	0.641905	0.520935	0.753251	12.7115	12.8369	11.4329	11.6889	9.41729	8.41587	Fbxo4	ENSMUSG00000022184	F-box protein 4 [Source:MGI Symbol;Acc:MGI:2146220]
ENSMUST00000022815	1.15319	-2.33834	2.32599	-1.00531	0.314749	NA	0	1.28369	0	4.87037	0	0.765079	Ngdn	ENSMUSG00000022204	neuroguidin, EIF4E binding protein [Source:MGI Symbol;Acc:MGI:1916216]
ENSMUST00000022816	13.3994	0.725172	0.47833	1.51605	0.129507	0.355675	13.6893	19.2553	17.589	8.76667	7.32456	13.7714	Sub1	ENSMUSG00000022205	SUB1 homolog, transcriptional regulator [Source:MGI Symbol;Acc:MGI:104811]
ENSMUST00000022819	1.14575	-0.313982	1.98481	-0.158193	0.874305	NA	0	1.28369	1.7589	0.974075	2.09273	0.765079	Jph4	ENSMUSG00000022208	junctophilin 4 [Source:MGI Symbol;Acc:MGI:2443113]
ENSMUST00000022820	0.290481	0.167149	4.08047	0.0409631	0.967325	NA	0.977805	0	0	0	0	0.765079	Dhrs2	ENSMUSG00000022209	dehydrogenase/reductase member 2 [Source:MGI Symbol;Acc:MGI:1918662]
ENSMUST00000022826	17.0358	0.755024	0.426975	1.76831	0.0770091	0.258518	18.5783	28.2412	17.589	15.5852	11.51	10.7111	Fitm1	ENSMUSG00000022215	fat storage-inducing transmembrane protein 1 [Source:MGI Symbol;Acc:MGI:1915930]
ENSMUST00000022831	0.29315	1.84622	4.0531	0.45551	0.648743	NA	0	0	1.7589	0	0	0	Khnyn	ENSMUSG00000047153	KH and NYN domain containing [Source:MGI Symbol;Acc:MGI:2451333]
ENSMUST00000022842	2.59411	0.979228	1.18227	0.828259	0.407524	NA	1.95561	1.28369	7.03561	1.94815	1.04637	2.29524	Cct5	ENSMUSG00000022234	chaperonin containing Tcp1, subunit 5 (epsilon) [Source:MGI Symbol;Acc:MGI:107185]
ENSMUST00000022853	0.348788	-1.85356	4.02474	-0.460542	0.645127	NA	0	0	0	0	2.09273	0	C1qtnf3	ENSMUSG00000058914	C1q and tumor necrosis factor related protein 3 [Source:MGI Symbol;Acc:MGI:1932136]
ENSMUST00000022855	6.52581	-0.215312	0.69786	-0.308532	0.757677	NA	2.93341	10.2695	5.27671	7.7926	5.23183	7.65079	Brix1	ENSMUSG00000022247	BRX1, biogenesis of ribosomes [Source:MGI Symbol;Acc:MGI:1915082]
ENSMUST00000022857	0.471889	0.940329	3.70719	0.25365	0.799766	NA	0.977805	0	0.879451	0.974075	0	0	Ttc23l	ENSMUSG00000022249	tetratricopeptide repeat domain 23-like [Source:MGI Symbol;Acc:MGI:1923027]
ENSMUST00000022865	3.87408	0.0427042	0.898093	0.0475499	0.962075	NA	3.91122	2.56738	5.27671	1.94815	4.18546	5.35556	Mtdh	ENSMUSG00000022255	metadherin [Source:MGI Symbol;Acc:MGI:1914404]
ENSMUST00000022867	0.464875	-0.705965	3.73161	-0.189185	0.849948	NA	0.977805	0	0	0	1.04637	0.765079	Laptm4b	ENSMUSG00000022257	lysosomal-associated protein transmembrane 4B [Source:MGI Symbol;Acc:MGI:1890494]
ENSMUST00000022871	39.5758	-0.0935598	0.283281	-0.330272	0.741195	0.887001	45.9568	28.2412	39.5753	41.8852	48.1328	33.6635	Sdc2	ENSMUSG00000022261	syndecan 2 [Source:MGI Symbol;Acc:MGI:1349165]
ENSMUST00000022875	4.43447	-0.936017	0.954119	-0.981027	0.326579	NA	4.88902	2.56738	1.7589	9.74075	0	7.65079	Ank	ENSMUSG00000022265	progressive ankylosis [Source:MGI Symbol;Acc:MGI:3045421]
ENSMUST00000022881	140.481	1.05228	0.155251	6.77793	1.21912e-11	3.83011e-10	203.383	182.284	183.805	87.6667	84.7556	100.99	Retreg1	ENSMUSG00000022270	reticulophagy regulator 1 [Source:MGI Symbol;Acc:MGI:1913520]
ENSMUST00000022890	91.7977	-0.0208898	0.181597	-0.115034	0.908418	0.960516	83.1134	101.411	89.7041	93.5112	88.941	94.1048	Rnf19a	ENSMUSG00000022280	ring finger protein 19A [Source:MGI Symbol;Acc:MGI:1353623]
ENSMUST00000022894	3.78656	-1.77826	1.00816	-1.76386	0.0777554	NA	2.93341	1.28369	0.879451	3.8963	8.37092	5.35556	Ywhaz	ENSMUSG00000022285	tyrosine 3-monooxygenase/tryptophan 5-monooxygenase activation protein, zeta polypeptide [Source:MGI Symbol;Acc:MGI:109484]
ENSMUST00000022897	0.360524	2.07797	4.03428	0.515078	0.606498	NA	0	1.28369	0.879451	0	0	0	4930447A16Rik	ENSMUSG00000022288	RIKEN cDNA 4930447A16 gene [Source:MGI Symbol;Acc:MGI:1922142]
ENSMUST00000022908	0.401602	-0.500283	4.06074	-0.1232	0.901949	NA	0	0	0.879451	0	0	1.53016	Slc25a32	ENSMUSG00000022299	solute carrier family 25, member 32 [Source:MGI Symbol;Acc:MGI:1917156]
ENSMUST00000022909	1.48724	0.253791	1.90736	0.133059	0.894147	NA	4.88902	0	0	0.974075	0	3.06032	Dcaf13	ENSMUSG00000022300	DDB1 and CUL4 associated factor 13 [Source:MGI Symbol;Acc:MGI:2684929]
ENSMUST00000022915	1.37317	-0.294301	1.99577	-0.147463	0.882767	NA	0	3.85107	0	0	2.09273	2.29524	Dpys	ENSMUSG00000022304	dihydropyrimidinase [Source:MGI Symbol;Acc:MGI:1928679]
ENSMUST00000022921	4.78395	-1.41807	0.869964	-1.63004	0.103094	NA	0.977805	1.28369	5.27671	8.76667	6.27819	6.12064	Angpt1	ENSMUSG00000022309	angiopoietin 1 [Source:MGI Symbol;Acc:MGI:108448]
ENSMUST00000022927	30.2978	0.324707	0.315066	1.0306	0.302729	0.575901	37.1566	37.227	27.263	23.3778	26.1591	30.6032	Rad21	ENSMUSG00000022314	RAD21 cohesin complex component [Source:MGI Symbol;Acc:MGI:108016]
ENSMUST00000022945	0.348788	-1.85356	4.02474	-0.460542	0.645127	NA	0	0	0	0	2.09273	0	Shcbp1	ENSMUSG00000022322	Shc SH2-domain binding protein 1 [Source:MGI Symbol;Acc:MGI:1338802]
ENSMUST00000022953	33.026	0.172602	0.321972	0.536077	0.591905	0.79934	25.4229	50.0639	30.7808	32.1445	23.02	36.7238	Fam135b	ENSMUSG00000036800	family with sequence similarity 135, member B [Source:MGI Symbol;Acc:MGI:1917613]
ENSMUST00000022962	3.50746	0.606064	0.967765	0.626251	0.53115	NA	5.86683	5.13476	1.7589	3.8963	2.09273	2.29524	Emc2	ENSMUSG00000022337	ER membrane protein complex subunit 2 [Source:MGI Symbol;Acc:MGI:1913986]
ENSMUST00000022967	31.1881	-0.483781	0.347904	-1.39056	0.164359	0.408767	17.6005	17.9717	41.3342	44.8074	35.5764	29.8381	Kcnv1	ENSMUSG00000022342	potassium channel, subfamily V, member 1 [Source:MGI Symbol;Acc:MGI:1914748]
ENSMUST00000022976	2.12452	1.05815	1.35383	0.781599	0.43445	NA	3.91122	1.28369	3.51781	0.974075	0	3.06032	Washc5	ENSMUSG00000022350	WASH complex subunit 5 [Source:MGI Symbol;Acc:MGI:2146110]
ENSMUST00000022980	6.33559	-0.291095	0.827099	-0.351947	0.724878	NA	1.95561	14.1206	1.7589	5.84445	2.09273	12.2413	Ndufb9	ENSMUSG00000022354	NADH:ubiquinone oxidoreductase subunit B9 [Source:MGI Symbol;Acc:MGI:1913468]
ENSMUST00000022985	0.290481	0.167149	4.08047	0.0409631	0.967325	NA	0.977805	0	0	0	0	0.765079	Klhl38	ENSMUSG00000022357	kelch-like 38 [Source:MGI Symbol;Acc:MGI:3045310]
ENSMUST00000022986	1.0788	-3.50272	2.31463	-1.51329	0.130205	NA	0	0	0	3.8963	1.04637	1.53016	Fbxo32	ENSMUSG00000022358	F-box protein 32 [Source:MGI Symbol;Acc:MGI:1914981]
ENSMUST00000022993	10.2759	-0.0062499	0.559473	-0.0111711	0.991087	0.995815	9.77805	14.1206	7.03561	5.84445	15.6955	9.18095	Derl1	ENSMUSG00000022365	Der1-like domain family, member 1 [Source:MGI Symbol;Acc:MGI:1915069]
ENSMUST00000023006	37.9254	0.228025	0.275634	0.827273	0.408082	0.666595	40.09	42.3618	40.4548	37.0148	32.4373	35.1937	Lrrc6	ENSMUSG00000022375	leucine rich repeat containing 6 (testis) [Source:MGI Symbol;Acc:MGI:1859553]
ENSMUST00000023036	1.19756	-1.53207	2.2069	-0.694218	0.487546	NA	0	0	1.7589	3.8963	0	1.53016	Rbx1	ENSMUSG00000022400	ring-box 1 [Source:MGI Symbol;Acc:MGI:1891829]
ENSMUST00000023040	0.255026	-1.46206	4.06074	-0.360047	0.718812	NA	0	0	0	0	0	1.53016	Slc25a17	ENSMUSG00000022404	solute carrier family 25 (mitochondrial carrier, peroxisomal membrane protein), member 17 [Source:MGI Symbol;Acc:MGI:1342248]
ENSMUST00000023043	0.467545	0.884442	4.0531	0.218214	0.827262	NA	0	0	1.7589	0	1.04637	0	Adsl	ENSMUSG00000022407	adenylosuccinate lyase [Source:MGI Symbol;Acc:MGI:103202]
ENSMUST00000023044	2.61286	0.158042	1.23125	0.128359	0.897865	NA	0.977805	0	7.03561	1.94815	4.18546	1.53016	Fam83f	ENSMUSG00000022408	family with sequence similarity 83, member F [Source:MGI Symbol;Acc:MGI:2146227]
ENSMUST00000023048	0.309543	1.89901	4.04988	0.468904	0.639138	NA	0.977805	0	0.879451	0	0	0	Mief1	ENSMUSG00000022412	mitochondrial elongation factor 1 [Source:MGI Symbol;Acc:MGI:2146020]
ENSMUST00000023050	3.49195	-0.429333	0.991636	-0.432955	0.665048	NA	1.95561	6.41845	0.879451	2.92222	4.18546	4.59048	Tab1	ENSMUSG00000022414	TGF-beta activated kinase 1/MAP3K7 binding protein 1 [Source:MGI Symbol;Acc:MGI:1913763]
ENSMUST00000023054	0.504429	1.17022	3.5924	0.32575	0.744614	NA	0.977805	1.28369	0	0	0	0.765079	Apobec3	ENSMUSG00000009585	apolipoprotein B mRNA editing enzyme, catalytic polypeptide 3 [Source:MGI Symbol;Acc:MGI:1933111]
ENSMUST00000023061	66.1032	-0.322532	0.218681	-1.4749	0.14024	0.372331	70.402	55.1987	51.0082	70.1334	68.0137	81.8635	Josd1	ENSMUSG00000022426	Josephin domain containing 1 [Source:MGI Symbol;Acc:MGI:1921408]
ENSMUST00000023062	2.0755	-0.550796	1.30907	-0.420752	0.673936	NA	1.95561	1.28369	1.7589	0.974075	4.18546	2.29524	Tomm22	ENSMUSG00000022427	translocase of outer mitochondrial membrane 22 [Source:MGI Symbol;Acc:MGI:2450248]
ENSMUST00000023064	34.0044	-0.411533	0.309381	-1.33018	0.183459	0.437032	26.4007	41.0781	21.1068	42.8593	36.6228	35.9587	Cby1	ENSMUSG00000022428	chibby family member 1, beta catenin antagonist [Source:MGI Symbol;Acc:MGI:1920989]
ENSMUST00000023067	0.290481	0.167149	4.08047	0.0409631	0.967325	NA	0.977805	0	0	0	0	0.765079	Ribc2	ENSMUSG00000022431	RIB43A domain with coiled-coils 2 [Source:MGI Symbol;Acc:MGI:1914997]
ENSMUST00000023068	105.309	-0.225547	0.176806	-1.27567	0.202072	0.460985	96.8027	100.128	94.9808	130.526	93.1265	116.292	Smc1b	ENSMUSG00000022432	structural maintenance of chromosomes 1B [Source:MGI Symbol;Acc:MGI:2154049]
ENSMUST00000023070	0.471267	-0.801225	4.03225	-0.198704	0.842494	NA	0	0	0.879451	1.94815	0	0	Upk3a	ENSMUSG00000022435	uroplakin 3A [Source:MGI Symbol;Acc:MGI:98914]
ENSMUST00000023071	18.9862	-0.149104	0.393111	-0.379292	0.704471	0.865958	19.5561	14.1206	20.2274	18.5074	17.7882	23.7175	Samm50	ENSMUSG00000022437	SAMM50 sorting and assembly machinery component [Source:MGI Symbol;Acc:MGI:1915903]
ENSMUST00000023072	3.33928	0.21593	0.996422	0.216705	0.828438	NA	0.977805	6.41845	3.51781	2.92222	3.1391	3.06032	Parvb	ENSMUSG00000022438	parvin, beta [Source:MGI Symbol;Acc:MGI:2153063]
ENSMUST00000023087	2.51809	-0.424771	1.29884	-0.32704	0.743638	NA	3.91122	2.56738	0	6.81852	1.04637	0.765079	Twf1	ENSMUSG00000022451	twinfilin actin binding protein 1 [Source:MGI Symbol;Acc:MGI:1100520]
ENSMUST00000023089	167.113	0.447937	0.140102	3.19722	0.00138761	0.0121705	183.827	183.568	210.189	142.215	144.398	138.479	Wbp2nl	ENSMUSG00000022455	WBP2 N-terminal like [Source:MGI Symbol;Acc:MGI:1921966]
ENSMUST00000023099	4.83232	0.128671	0.883463	0.145644	0.884203	NA	8.80024	3.85107	2.63835	6.81852	0	6.88572	Slc38a2	ENSMUSG00000022462	solute carrier family 38, member 2 [Source:MGI Symbol;Acc:MGI:1915010]
ENSMUST00000023100	2.30413	-0.713704	1.26151	-0.565756	0.57156	NA	1.95561	2.56738	0.879451	0.974075	2.09273	5.35556	Srebf2	ENSMUSG00000022463	sterol regulatory element binding factor 2 [Source:MGI Symbol;Acc:MGI:107585]
ENSMUST00000023104	3.00935	-0.588288	1.06574	-0.552	0.580948	NA	2.93341	2.56738	1.7589	0.974075	5.23183	4.59048	Rpap3	ENSMUSG00000022466	RNA polymerase II associated protein 3 [Source:MGI Symbol;Acc:MGI:1277218]
ENSMUST00000023110	0.974696	-2.12342	2.74083	-0.774735	0.438496	NA	0.977805	0	0	4.87037	0	0	Desi1	ENSMUSG00000022472	desumoylating isopeptidase 1 [Source:MGI Symbol;Acc:MGI:106313]
ENSMUST00000023113	4.17259	1.42115	0.949347	1.49698	0.1344	NA	6.84463	7.70214	3.51781	0.974075	5.23183	0.765079	Polr3h	ENSMUSG00000022476	polymerase (RNA) III (DNA directed) polypeptide H [Source:MGI Symbol;Acc:MGI:1926179]
ENSMUST00000023116	23.4144	-0.249306	0.374493	-0.665717	0.505592	0.742989	32.2676	14.1206	17.589	27.2741	20.9273	28.3079	Aco2	ENSMUSG00000022477	aconitase 2, mitochondrial [Source:MGI Symbol;Acc:MGI:87880]
ENSMUST00000023117	0.77814	-0.453609	2.84484	-0.15945	0.873314	NA	1.95561	0	0	1.94815	0	0.765079	Phf5a	ENSMUSG00000061360	PHD finger protein 5A [Source:MGI Symbol;Acc:MGI:2156864]
ENSMUST00000023119	1.70886	-0.79612	1.60939	-0.494671	0.620832	NA	1.95561	0	1.7589	1.94815	0	4.59048	Vdr	ENSMUSG00000022479	vitamin D (1,25-dihydroxyvitamin D3) receptor [Source:MGI Symbol;Acc:MGI:103076]
ENSMUST00000023133	1.38279	-1.51458	1.95095	-0.776328	0.437555	NA	0	1.28369	0.879451	1.94815	4.18546	0	Ppp1r1a	ENSMUSG00000022490	protein phosphatase 1, regulatory inhibitor subunit 1A [Source:MGI Symbol;Acc:MGI:1889595]
ENSMUST00000023138	0.651004	1.65992	2.92685	0.567135	0.570623	NA	0.977805	1.28369	0.879451	0	0	0.765079	Shisa9	ENSMUSG00000022494	shisa family member 9 [Source:MGI Symbol;Acc:MGI:1919805]
ENSMUST00000023143	3.09485	0.0819377	1.01892	0.0804165	0.935906	NA	1.95561	5.13476	2.63835	2.92222	2.09273	3.8254	Litaf	ENSMUSG00000022500	LPS-induced TN factor [Source:MGI Symbol;Acc:MGI:1929512]
ENSMUST00000023144	2.96072	0.324345	1.03685	0.312817	0.75442	NA	2.93341	2.56738	4.39726	1.94815	2.09273	3.8254	Prm1	ENSMUSG00000022501	protamine 1 [Source:MGI Symbol;Acc:MGI:97765]
ENSMUST00000023147	0.90441	-3.25232	2.76066	-1.17809	0.238759	NA	0	0	0	3.8963	0	1.53016	Ciita	ENSMUSG00000022504	class II transactivator [Source:MGI Symbol;Acc:MGI:108445]
ENSMUST00000023150	49.1078	-0.0792942	0.272885	-0.290577	0.771375	0.899359	41.0678	51.3476	51.8876	51.626	31.391	67.327	1810013L24Rik	ENSMUSG00000022507	RIKEN cDNA 1810013L24 gene [Source:MGI Symbol;Acc:MGI:1916303]
ENSMUST00000023151	23.7469	0.0790957	0.36073	0.219266	0.826443	0.923454	17.6005	24.3901	30.7808	23.3778	27.2055	19.127	Bcl6	ENSMUSG00000022508	B cell leukemia/lymphoma 6 [Source:MGI Symbol;Acc:MGI:107187]
ENSMUST00000023156	1.36556	-1.6947	1.828	-0.92708	0.353885	NA	0.977805	0	0.879451	1.94815	2.09273	2.29524	Il1rap	ENSMUSG00000022514	interleukin 1 receptor accessory protein [Source:MGI Symbol;Acc:MGI:104975]
ENSMUST00000023165	13.5672	-1.15259	0.785135	-1.46801	0.1421	0.374966	1.95561	6.41845	16.7096	14.6111	15.6955	26.0127	Crebbp	ENSMUSG00000022521	CREB binding protein [Source:MGI Symbol;Acc:MGI:1098280]
ENSMUST00000023206	1.38807	1.73684	1.9117	0.908534	0.363596	NA	2.93341	2.56738	0.879451	1.94815	0	0	Ercc4	ENSMUSG00000022545	excision repair cross-complementing rodent repair deficiency, complementation group 4 [Source:MGI Symbol;Acc:MGI:1354163]
ENSMUST00000023213	40.2311	-0.444345	0.276728	-1.60571	0.108337	0.317046	30.312	28.2412	43.0931	45.7815	44.9937	48.9651	Hgh1	ENSMUSG00000022554	HGH1 homolog [Source:MGI Symbol;Acc:MGI:1930628]
ENSMUST00000023217	106.54	0.176221	0.174498	1.00988	0.312555	0.583625	110.492	106.546	121.364	84.7445	115.1	100.99	Bop1	ENSMUSG00000022557	block of proliferation 1 [Source:MGI Symbol;Acc:MGI:1334460]
ENSMUST00000023225	107.714	-0.307467	0.175456	-1.75239	0.0797066	0.264282	91.9137	107.83	90.5835	129.552	99.4047	127.003	Grina	ENSMUSG00000022564	glutamate receptor, ionotropic, N-methyl D-aspartate-associated protein 1 (glutamate binding) [Source:MGI Symbol;Acc:MGI:1913418]
ENSMUST00000023259	0.971596	-0.0150867	2.32096	-0.0065002	0.994814	NA	1.95561	0	0.879451	1.94815	1.04637	0	Lynx1	ENSMUSG00000022594	Ly6/neurotoxin 1 [Source:MGI Symbol;Acc:MGI:1345180]
ENSMUST00000023260	0.745355	-0.556393	2.91287	-0.191011	0.848517	NA	0	0	1.7589	1.94815	0	0.765079	Lypd2	ENSMUSG00000022595	Ly6/Plaur domain containing 2 [Source:MGI Symbol;Acc:MGI:1915561]
ENSMUST00000023261	0.301907	-1.66764	4.04066	-0.412715	0.679815	NA	0	0	0	0	1.04637	0.765079	Slurp1	ENSMUSG00000022596	secreted Ly6/Plaur domain containing 1 [Source:MGI Symbol;Acc:MGI:1930923]
ENSMUST00000023262	3.6573	-0.815303	0.946285	-0.861583	0.388917	NA	2.93341	1.28369	3.51781	4.87037	6.27819	3.06032	Gm9747	ENSMUSG00000022591	predicted gene 9747 [Source:MGI Symbol;Acc:MGI:3710571]
ENSMUST00000023265	5.71307	0.575105	0.736923	0.780415	0.435147	NA	8.80024	6.41845	5.27671	6.81852	3.1391	3.8254	Psca	ENSMUSG00000022598	prostate stem cell antigen [Source:MGI Symbol;Acc:MGI:1919623]
ENSMUST00000023269	2.42152	-0.699029	1.28828	-0.542608	0.5874	NA	0	3.85107	1.7589	2.92222	5.23183	0.765079	Rpl24	ENSMUSG00000098274	ribosomal protein L24 [Source:MGI Symbol;Acc:MGI:1915443]
ENSMUST00000023270	4.36055	-1.4401	0.921406	-1.56294	0.118067	NA	3.91122	1.28369	1.7589	10.7148	3.1391	5.35556	Cep97	ENSMUSG00000022604	centrosomal protein 97 [Source:MGI Symbol;Acc:MGI:1921451]
ENSMUST00000023271	2.39438	-1.4489	1.26198	-1.14811	0.250923	NA	1.95561	0	1.7589	2.92222	3.1391	4.59048	Mroh4	ENSMUSG00000022603	maestro heat-like repeat family member 4 [Source:MGI Symbol;Acc:MGI:1916689]
ENSMUST00000023285	847.72	0.288182	0.0764768	3.76823	0.000164409	0.00194898	954.338	892.164	948.049	770.493	763.846	757.429	Tymp	ENSMUSG00000022615	thymidine phosphorylase [Source:MGI Symbol;Acc:MGI:1920212]
ENSMUST00000023291	128.484	-0.591181	0.159302	-3.71107	0.000206383	0.00239391	100.714	101.411	104.655	150.982	171.604	141.54	Mapk8ip2	ENSMUSG00000022619	mitogen-activated protein kinase 8 interacting protein 2 [Source:MGI Symbol;Acc:MGI:1926555]
ENSMUST00000023295	0.337362	0.167149	4.08047	0.0409631	0.967325	NA	0.977805	0	0	0	1.04637	0	Acr	ENSMUSG00000022622	acrosin prepropeptide [Source:MGI Symbol;Acc:MGI:87884]
ENSMUST00000023312	0.308921	0.167149	4.08047	0.0409631	0.967325	NA	0	0	0.879451	0.974075	0	0	Alcam	ENSMUSG00000022636	activated leukocyte cell adhesion molecule [Source:MGI Symbol;Acc:MGI:1313266]
ENSMUST00000023328	3.55698	0.145246	0.969432	0.149826	0.880902	NA	2.93341	3.85107	4.39726	6.81852	1.04637	2.29524	Retnlb	ENSMUSG00000022650	resistin like beta [Source:MGI Symbol;Acc:MGI:1888505]
ENSMUST00000023330	1.02448	-1.2391	2.40644	-0.514909	0.606617	NA	0	0	1.7589	0	2.09273	2.29524	Morc1	ENSMUSG00000022652	microrchidia 1 [Source:MGI Symbol;Acc:MGI:1316740]
ENSMUST00000023334	71.6147	0.832466	0.213949	3.89095	9.98506e-05	0.00121732	97.7805	92.4257	85.3068	38.963	58.5964	56.6159	Nectin3	ENSMUSG00000022656	nectin cell adhesion molecule 3 [Source:MGI Symbol;Acc:MGI:1930171]
ENSMUST00000023335	23.1211	0.0406582	0.382794	0.106215	0.915412	0.961484	27.3785	16.688	26.3835	24.3519	12.5564	31.3683	Nectin3	ENSMUSG00000022656	nectin cell adhesion molecule 3 [Source:MGI Symbol;Acc:MGI:1930171]
ENSMUST00000023336	24.4526	1.11484	0.37493	2.97346	0.00294462	0.0224973	40.09	20.539	39.5753	11.6889	15.6955	19.127	Cd96	ENSMUSG00000022657	CD96 antigen [Source:MGI Symbol;Acc:MGI:1934368]
ENSMUST00000023339	0.309543	1.89901	4.04988	0.468904	0.639138	NA	0.977805	0	0.879451	0	0	0	Gcsam	ENSMUSG00000022659	germinal center associated, signaling and motility [Source:MGI Symbol;Acc:MGI:102969]
ENSMUST00000023343	7.73743	0.739999	0.653422	1.1325	0.257425	NA	13.6893	7.70214	7.91506	5.84445	2.09273	9.18095	Atg3	ENSMUSG00000022663	autophagy related 3 [Source:MGI Symbol;Acc:MGI:1915091]
ENSMUST00000023344	1.5851	0.238029	1.62905	0.146115	0.883831	NA	3.91122	1.28369	0	0.974075	1.04637	2.29524	Slc35a5	ENSMUSG00000022664	solute carrier family 35, member A5 [Source:MGI Symbol;Acc:MGI:1921352]
ENSMUST00000023352	31.5272	-0.205365	0.306656	-0.669691	0.503055	0.740914	27.3785	34.6596	26.3835	37.0148	29.2982	34.4286	Prkdc	ENSMUSG00000022672	protein kinase, DNA activated, catalytic polypeptide [Source:MGI Symbol;Acc:MGI:104779]
ENSMUST00000023353	8.59941	-0.191993	0.595452	-0.322432	0.747126	NA	10.7559	5.13476	7.91506	6.81852	12.5564	8.41587	Mcm4	ENSMUSG00000022673	minichromosome maintenance complex component 4 [Source:MGI Symbol;Acc:MGI:103199]
ENSMUST00000023356	0.972839	2.29459	2.53408	0.905493	0.365204	NA	3.91122	0	0.879451	0	1.04637	0	Snai2	ENSMUSG00000022676	snail family zinc finger 2 [Source:MGI Symbol;Acc:MGI:1096393]
ENSMUST00000023361	2.39577	-0.0907958	1.18254	-0.0767805	0.938798	NA	2.93341	1.28369	2.63835	3.8963	2.09273	1.53016	Pdxdc1	ENSMUSG00000022680	pyridoxal-dependent decarboxylase domain containing 1 [Source:MGI Symbol;Acc:MGI:1920909]
ENSMUST00000023363	13.0602	0.00883504	0.51488	0.0171594	0.986309	0.994455	17.6005	16.688	5.27671	8.76667	17.7882	12.2413	Rrn3	ENSMUSG00000022682	RRN3 RNA polymerase I transcription factor homolog (yeast) [Source:MGI Symbol;Acc:MGI:1925255]
ENSMUST00000023364	5.02792	0.25292	0.778393	0.324925	0.745238	NA	6.84463	5.13476	4.39726	2.92222	6.27819	4.59048	Pla2g10	ENSMUSG00000022683	phospholipase A2, group X [Source:MGI Symbol;Acc:MGI:1347522]
ENSMUST00000023365	1.40435	-2.76674	2.0718	-1.33543	0.181735	NA	0.977805	0	0	0	2.09273	5.35556	Bfar	ENSMUSG00000022684	bifunctional apoptosis regulator [Source:MGI Symbol;Acc:MGI:1914368]
ENSMUST00000023391	3.50912	0.238037	0.965452	0.246555	0.805252	NA	2.93341	5.13476	3.51781	0.974075	3.1391	5.35556	Mrpl40	ENSMUSG00000022706	mitochondrial ribosomal protein L40 [Source:MGI Symbol;Acc:MGI:1332635]
ENSMUST00000023396	8.66044	-0.0325985	0.607288	-0.0536788	0.957191	NA	13.6893	7.70214	4.39726	10.7148	6.27819	9.18095	Pmm2	ENSMUSG00000022711	phosphomannomutase 2 [Source:MGI Symbol;Acc:MGI:1859214]
ENSMUST00000023400	4.20277	0.561467	1.00339	0.559571	0.575772	NA	4.88902	6.41845	3.51781	0.974075	9.41729	0	Tmem114	ENSMUSG00000022715	transmembrane protein 114 [Source:MGI Symbol;Acc:MGI:1921970]
ENSMUST00000023405	0.29315	1.84622	4.0531	0.45551	0.648743	NA	0	0	1.7589	0	0	0	Arl6	ENSMUSG00000022722	ADP-ribosylation factor-like 6 [Source:MGI Symbol;Acc:MGI:1927136]
ENSMUST00000023407	11.9864	0.776434	0.512477	1.51506	0.129757	0.35592	13.6893	11.5532	20.2274	9.74075	5.23183	11.4762	Riox2	ENSMUSG00000022724	ribosomal oxygenase 2 [Source:MGI Symbol;Acc:MGI:1914264]
ENSMUST00000023426	1.11311	1.26377	2.33202	0.541921	0.587873	NA	0	3.85107	0.879451	1.94815	0	0	Cldnd1	ENSMUSG00000022744	claudin domain containing 1 [Source:MGI Symbol;Acc:MGI:2447860]
ENSMUST00000023431	0.697885	1.65943	2.83345	0.585657	0.558106	NA	0.977805	1.28369	0.879451	0	1.04637	0	Tbc1d23	ENSMUSG00000022749	TBC1 domain family, member 23 [Source:MGI Symbol;Acc:MGI:1914831]
ENSMUST00000023435	0.29315	1.84622	4.0531	0.45551	0.648743	NA	0	0	1.7589	0	0	0	Tmem45a	ENSMUSG00000022754	transmembrane protein 45a [Source:MGI Symbol;Acc:MGI:1913122]
ENSMUST00000023437	0.255026	-1.46206	4.06074	-0.360047	0.718812	NA	0	0	0	0	0	1.53016	Adgrg7	ENSMUSG00000022755	adhesion G protein-coupled receptor G7 [Source:MGI Symbol;Acc:MGI:2441732]
ENSMUST00000023441	0.348788	-1.85356	4.02474	-0.460542	0.645127	NA	0	0	0	0	2.09273	0	P2rx6	ENSMUSG00000022758	purinergic receptor P2X, ligand-gated ion channel, 6 [Source:MGI Symbol;Acc:MGI:1337113]
ENSMUST00000023444	0.483937	0.940785	3.66412	0.256756	0.797367	NA	0.977805	0	0.879451	0	1.04637	0	Lztr1	ENSMUSG00000022761	leucine-zipper-like transcriptional regulator, 1 [Source:MGI Symbol;Acc:MGI:1914113]
ENSMUST00000023449	38.2697	-0.158982	0.286371	-0.55516	0.578785	0.792913	39.1122	30.8086	38.6959	33.1185	36.6228	51.2603	Snap29	ENSMUSG00000022765	synaptosomal-associated protein 29 [Source:MGI Symbol;Acc:MGI:1914724]
ENSMUST00000023450	1.33685	-2.64355	2.17053	-1.21793	0.223251	NA	0.977805	0	0	0	6.27819	0.765079	Serpind1	ENSMUSG00000022766	serine (or cysteine) peptidase inhibitor, clade D, member 1 [Source:MGI Symbol;Acc:MGI:96051]
ENSMUST00000023452	137.516	-0.0772056	0.152507	-0.506245	0.612685	0.813888	135.915	141.206	124.882	129.552	152.769	140.775	Ccdc116	ENSMUSG00000022768	coiled-coil domain containing 116 [Source:MGI Symbol;Acc:MGI:1924122]
ENSMUST00000023453	28.5321	0.334126	0.318196	1.05006	0.293689	0.566048	33.2454	33.3759	29.0219	23.3778	26.1591	26.0127	Sdf2l1	ENSMUSG00000022769	stromal cell-derived factor 2-like 1 [Source:MGI Symbol;Acc:MGI:2149842]
ENSMUST00000023455	1.585	1.17666	1.73362	0.67873	0.497309	NA	0.977805	3.85107	1.7589	2.92222	0	0	Ppil2	ENSMUSG00000022771	peptidylprolyl isomerase (cyclophilin)-like 2 [Source:MGI Symbol;Acc:MGI:2447857]
ENSMUST00000023460	3.93635	-0.473514	0.895136	-0.528986	0.596815	NA	4.88902	1.28369	3.51781	4.87037	5.23183	3.8254	Ncbp2	ENSMUSG00000022774	nuclear cap binding protein subunit 2 [Source:MGI Symbol;Acc:MGI:1915342]
ENSMUST00000023464	97.2343	-0.0724121	0.189791	-0.381537	0.702805	0.865541	105.603	73.1703	103.775	116.889	95.2192	88.7492	Meltf	ENSMUSG00000022780	melanotransferrin [Source:MGI Symbol;Acc:MGI:1353421]
ENSMUST00000023467	28.5812	0.0333793	0.320622	0.104108	0.917084	0.96256	33.2454	23.1064	29.9014	26.3	31.391	27.5429	Pak2	ENSMUSG00000022781	p21 (RAC1) activated kinase 2 [Source:MGI Symbol;Acc:MGI:1339984]
ENSMUST00000023468	44.3003	-0.221311	0.274278	-0.806887	0.419732	0.677099	44.0012	38.5107	40.4548	59.4186	31.391	52.0254	Spag6l	ENSMUSG00000022783	sperm associated antigen 6-like [Source:MGI Symbol;Acc:MGI:1354388]
ENSMUST00000023469	0.515856	-0.706037	3.55493	-0.198608	0.842569	NA	0	1.28369	0	0	1.04637	0.765079	Btnl7-ps	ENSMUSG00000061728	butyrophilin-like 7, pseudogene [Source:MGI Symbol;Acc:MGI:2388054]
ENSMUST00000023478	5.67033	-0.952569	0.784426	-1.21435	0.224613	NA	5.86683	5.13476	0.879451	4.87037	7.32456	9.94603	Igsf11	ENSMUSG00000022790	immunoglobulin superfamily, member 11 [Source:MGI Symbol;Acc:MGI:2388477]
ENSMUST00000023487	9.55981	-0.513321	0.998749	-0.513964	0.607277	0.810551	6.84463	5.13476	11.4329	1.94815	25.1128	6.88572	Arhgap31	ENSMUSG00000022799	Rho GTPase activating protein 31 [Source:MGI Symbol;Acc:MGI:1333857]
ENSMUST00000023489	20.2941	-0.263782	0.397142	-0.664201	0.506561	0.743114	26.4007	16.688	12.3123	17.5333	25.1128	23.7175	Fyttd1	ENSMUSG00000022800	forty-two-three domain containing 1 [Source:MGI Symbol;Acc:MGI:1917955]
ENSMUST00000023491	111.97	-0.0132764	0.164525	-0.0806956	0.935684	0.97115	109.514	115.532	109.931	115.915	104.637	116.292	Lrch3	ENSMUSG00000022801	leucine-rich repeats and calponin homology (CH) domain containing 3 [Source:MGI Symbol;Acc:MGI:1917394]
ENSMUST00000023497	11.2244	-0.11201	0.518248	-0.216131	0.828885	0.924957	6.84463	11.5532	14.0712	11.6889	9.41729	13.7714	Lmln	ENSMUSG00000022802	leishmanolysin-like (metallopeptidase M8 family) [Source:MGI Symbol;Acc:MGI:2444736]
ENSMUST00000023501	44.6575	-0.0351309	0.257397	-0.136485	0.891438	0.954255	44.979	50.0639	37.8164	42.8593	47.0864	45.1397	Maats1	ENSMUSG00000022805	MYCBP-associated, testis expressed 1 [Source:MGI Symbol;Acc:MGI:2443598]
ENSMUST00000023504	2.60789	-0.742831	1.30956	-0.567239	0.570552	NA	4.88902	0	0.879451	6.81852	0	3.06032	Nr1i2	ENSMUSG00000022809	nuclear receptor subfamily 1, group I, member 2 [Source:MGI Symbol;Acc:MGI:1337040]
ENSMUST00000023507	11.3203	0.674233	0.556792	1.21092	0.225924	0.490409	4.88902	19.2553	17.589	7.7926	11.51	6.88572	Gsk3b	ENSMUSG00000022812	glycogen synthase kinase 3 beta [Source:MGI Symbol;Acc:MGI:1861437]
ENSMUST00000023509	34.8293	0.147166	0.308619	0.476852	0.633468	0.825842	45.9568	39.7944	24.6246	26.3	35.5764	36.7238	Klhl24	ENSMUSG00000062901	kelch-like 24 [Source:MGI Symbol;Acc:MGI:1923035]
ENSMUST00000023510	0.301907	-1.66764	4.04066	-0.412715	0.679815	NA	0	0	0	0	1.04637	0.765079	Umps	ENSMUSG00000022814	uridine monophosphate synthetase [Source:MGI Symbol;Acc:MGI:1298388]
ENSMUST00000023525	10.6207	-0.602958	0.585748	-1.02938	0.303301	0.576329	13.6893	1.28369	9.67397	8.76667	18.8346	11.4762	Gtf2e1	ENSMUSG00000022828	general transcription factor II E, polypeptide 1 (alpha subunit) [Source:MGI Symbol;Acc:MGI:1921447]
ENSMUST00000023530	0.678202	-1.32189	2.87112	-0.460408	0.645224	NA	0	1.28369	0	0.974075	1.04637	0.765079	Ropn1	ENSMUSG00000022832	ropporin, rhophilin associated protein 1 [Source:MGI Symbol;Acc:MGI:1923628]
ENSMUST00000023531	1.06984	1.08846	2.35564	0.462068	0.644033	NA	0	2.56738	1.7589	0	2.09273	0	Hcls1	ENSMUSG00000022831	hematopoietic cell specific Lyn substrate 1 [Source:MGI Symbol;Acc:MGI:104568]
ENSMUST00000023538	16.0414	-0.831071	0.449299	-1.84971	0.0643558	0.229104	16.6227	8.98583	8.79451	16.5593	26.1591	19.127	Mylk	ENSMUSG00000022836	myosin, light polypeptide kinase [Source:MGI Symbol;Acc:MGI:894806]
ENSMUST00000023550	0.658331	-0.0979657	3.1452	-0.0311477	0.975152	NA	0.977805	0	0.879451	0	2.09273	0	Pdia5	ENSMUSG00000022844	protein disulfide isomerase associated 5 [Source:MGI Symbol;Acc:MGI:1919849]
ENSMUST00000023559	1.38087	-1.69477	2.06635	-0.820176	0.412116	NA	1.95561	0	0	0.974075	0	5.35556	Ehhadh	ENSMUSG00000022853	enoyl-Coenzyme A, hydratase/3-hydroxyacyl Coenzyme A dehydrogenase [Source:MGI Symbol;Acc:MGI:1277964]
ENSMUST00000023561	7.32485	-0.735207	0.642822	-1.14372	0.252741	NA	4.88902	6.41845	5.27671	8.76667	9.41729	9.18095	Senp2	ENSMUSG00000022855	SUMO/sentrin specific peptidase 2 [Source:MGI Symbol;Acc:MGI:1923076]
ENSMUST00000023570	0.455496	0.884442	4.0531	0.218214	0.827262	NA	0	0	1.7589	0.974075	0	0	Btg3	ENSMUSG00000022863	B cell translocation gene 3 [Source:MGI Symbol;Acc:MGI:109532]
ENSMUST00000023572	2.27823	-0.88123	1.29347	-0.681292	0.495687	NA	2.93341	0	1.7589	4.87037	1.04637	3.06032	Cxadr	ENSMUSG00000022865	coxsackie virus and adenovirus receptor [Source:MGI Symbol;Acc:MGI:1201679]
ENSMUST00000023589	0.29315	1.84622	4.0531	0.45551	0.648743	NA	0	0	1.7589	0	0	0	Kng1	ENSMUSG00000022875	kininogen 1 [Source:MGI Symbol;Acc:MGI:1097705]
ENSMUST00000023593	6.78189	0.275593	0.675129	0.408208	0.683121	NA	3.91122	7.70214	10.5534	5.84445	7.32456	5.35556	Adipoq	ENSMUSG00000022878	adiponectin, C1Q and collagen domain containing [Source:MGI Symbol;Acc:MGI:106675]
ENSMUST00000023599	2.82855	1.20367	1.14869	1.04787	0.294699	NA	1.95561	3.85107	6.15616	1.94815	0	3.06032	Eif4a2	ENSMUSG00000022884	eukaryotic translation initiation factor 4A2 [Source:MGI Symbol;Acc:MGI:106906]
ENSMUST00000023601	0.855793	3.30617	3.15572	1.04767	0.294789	NA	0	5.13476	0	0	0	0	St6gal1	ENSMUSG00000022885	beta galactoside alpha 2,6 sialyltransferase 1 [Source:MGI Symbol;Acc:MGI:108470]
ENSMUST00000023610	2.65236	-0.421923	1.19577	-0.352846	0.724204	NA	4.88902	0	1.7589	0.974075	5.23183	3.06032	Adamts1	ENSMUSG00000022893	a disintegrin-like and metallopeptidase (reprolysin type) with thrombospondin type 1 motif, 1 [Source:MGI Symbol;Acc:MGI:109249]
ENSMUST00000023611	19.6806	-0.654175	0.387723	-1.68722	0.0915604	0.285607	13.6893	15.4043	16.7096	22.4037	26.1591	23.7175	Adamts5	ENSMUSG00000022894	a disintegrin-like and metallopeptidase (reprolysin type) with thrombospondin type 1 motif, 5 (aggrecanase-2) [Source:MGI Symbol;Acc:MGI:1346321]
ENSMUST00000023612	0.427897	2.30122	4.01629	0.572971	0.566664	NA	0	2.56738	0	0	0	0	Ets2	ENSMUSG00000022895	E26 avian leukemia oncogene 2, 3' domain [Source:MGI Symbol;Acc:MGI:95456]
ENSMUST00000023615	16.908	0.116791	0.43954	0.265711	0.790462	0.908166	25.4229	15.4043	12.3123	14.6111	11.51	22.1873	Vps26c	ENSMUSG00000022898	VPS26 endosomal protein sorting factor C [Source:MGI Symbol;Acc:MGI:1206040]
ENSMUST00000023616	0.590864	2.78103	3.54845	0.783731	0.433198	NA	0.977805	2.56738	0	0	0	0	Slc15a2	ENSMUSG00000022899	solute carrier family 15 (H+/peptide transporter), member 2 [Source:MGI Symbol;Acc:MGI:1890457]
ENSMUST00000023629	4.30274	0.77012	0.950281	0.810413	0.417703	NA	11.7337	2.56738	1.7589	1.94815	6.27819	1.53016	Pros1	ENSMUSG00000022912	protein S (alpha) [Source:MGI Symbol;Acc:MGI:1095733]
ENSMUST00000023660	1.13994	-1.45008	2.1436	-0.676469	0.498743	NA	0	0	1.7589	0.974075	1.04637	3.06032	Ripply3	ENSMUSG00000022941	ripply transcriptional repressor 3 [Source:MGI Symbol;Acc:MGI:2181192]
ENSMUST00000023670	1.61031	0.795559	1.57935	0.503726	0.614454	NA	0.977805	2.56738	2.63835	1.94815	0	1.53016	Clic6	ENSMUSG00000022949	chloride intracellular channel 6 [Source:MGI Symbol;Acc:MGI:2146607]
ENSMUST00000023686	15.3742	-0.431509	0.488258	-0.883774	0.376818	0.642985	10.7559	20.539	8.79451	7.7926	19.8809	24.4825	Tmem50b	ENSMUSG00000022964	transmembrane protein 50B [Source:MGI Symbol;Acc:MGI:1925225]
ENSMUST00000023687	0.483315	-0.843486	3.66446	-0.23018	0.817952	NA	0	0	0.879451	0.974075	1.04637	0	Ifngr2	ENSMUSG00000022965	interferon gamma receptor 2 [Source:MGI Symbol;Acc:MGI:107654]
ENSMUST00000023689	1.96611	0.601323	1.36748	0.43973	0.660132	NA	0.977805	2.56738	3.51781	2.92222	1.04637	0.765079	Ifnar1	ENSMUSG00000022967	interferon (alpha and beta) receptor 1 [Source:MGI Symbol;Acc:MGI:107658]
ENSMUST00000023694	63.4554	1.35606	0.256211	5.29273	1.20505e-07	2.51268e-06	72.3576	96.2767	105.534	49.6778	20.9273	35.9587	Cfap298	ENSMUSG00000022972	cilia and flagella associate protien 298 [Source:MGI Symbol;Acc:MGI:1915251]
ENSMUST00000023712	0.448483	-0.705943	3.79395	-0.186071	0.852389	NA	0	0	0.879451	0	1.04637	0.765079	Krt2	ENSMUSG00000064201	keratin 2 [Source:MGI Symbol;Acc:MGI:96699]
ENSMUST00000023714	0.488902	2.53872	3.9999	0.634697	0.525626	NA	2.93341	0	0	0	0	0	Krt90	ENSMUSG00000048699	keratin 90 [Source:MGI Symbol;Acc:MGI:3045312]
ENSMUST00000023728	25.2231	-0.307212	0.355363	-0.864501	0.387313	0.650968	17.6005	30.8086	20.2274	26.3	21.9737	34.4286	4930415O20Rik	ENSMUSG00000022993	RIKEN cDNA 4930415O20 gene [Source:MGI Symbol;Acc:MGI:1921113]
ENSMUST00000023734	1.37261	0.764782	1.89714	0.403124	0.686857	NA	2.93341	1.28369	0.879451	0	3.1391	0	Wnt1	ENSMUSG00000022997	wingless-type MMTV integration site family, member 1 [Source:MGI Symbol;Acc:MGI:98953]
ENSMUST00000023736	0.320969	0.167149	4.08047	0.0409631	0.967325	NA	0	0	0.879451	0	1.04637	0	Lmbr1l	ENSMUSG00000022999	limb region 1 like [Source:MGI Symbol;Acc:MGI:1289247]
ENSMUST00000023737	52.2896	0.39073	0.251699	1.55237	0.120574	0.339649	73.3354	50.0639	53.6465	52.6	48.1328	35.9587	Dhh	ENSMUSG00000023000	desert hedgehog [Source:MGI Symbol;Acc:MGI:94891]
ENSMUST00000023747	32.0799	0.0281462	0.308666	0.0911867	0.927344	0.967279	27.3785	28.2412	41.3342	29.2222	30.3446	35.9587	Nckap5l	ENSMUSG00000023009	NCK-associated protein 5-like [Source:MGI Symbol;Acc:MGI:3609653]
ENSMUST00000023749	39.9475	-0.356086	0.279702	-1.27309	0.202986	0.461728	30.312	42.3618	33.4192	46.7556	35.5764	51.2603	Tmbim6	ENSMUSG00000023010	transmembrane BAX inhibitor motif containing 6 [Source:MGI Symbol;Acc:MGI:99682]
ENSMUST00000023752	0.337362	0.167149	4.08047	0.0409631	0.967325	NA	0.977805	0	0	0	1.04637	0	Aqp2	ENSMUSG00000023013	aquaporin 2 [Source:MGI Symbol;Acc:MGI:1096865]
ENSMUST00000023759	2.54564	0.787675	1.17701	0.669219	0.503356	NA	2.93341	1.28369	5.27671	2.92222	2.09273	0.765079	Smarcd1	ENSMUSG00000023018	SWI/SNF related, matrix associated, actin dependent regulator of chromatin, subfamily d, member 1 [Source:MGI Symbol;Acc:MGI:1933623]
ENSMUST00000023760	2.79585	0.672135	1.09337	0.614734	0.53873	NA	2.93341	3.85107	3.51781	3.8963	1.04637	1.53016	Gpd1	ENSMUSG00000023019	glycerol-3-phosphate dehydrogenase 1 (soluble) [Source:MGI Symbol;Acc:MGI:95679]
ENSMUST00000023761	6.67654	0.251021	0.665734	0.377058	0.70613	NA	5.86683	8.98583	7.03561	6.81852	5.23183	6.12064	Cox14	ENSMUSG00000023020	cytochrome c oxidase assembly protein 14 [Source:MGI Symbol;Acc:MGI:1913629]
ENSMUST00000023768	0.348788	-1.85356	4.02474	-0.460542	0.645127	NA	0	0	0	0	2.09273	0	Dip2b	ENSMUSG00000023026	disco interacting protein 2 homolog B [Source:MGI Symbol;Acc:MGI:2145977]
ENSMUST00000023769	3.5576	0.536785	1.03836	0.516955	0.605188	NA	6.84463	5.13476	0.879451	3.8963	0	4.59048	Atf1	ENSMUSG00000023027	activating transcription factor 1 [Source:MGI Symbol;Acc:MGI:1298366]
ENSMUST00000023774	0.289859	-1.61836	4.04523	-0.400066	0.689108	NA	0	0	0	0.974075	0	0.765079	Slc11a2	ENSMUSG00000023030	solute carrier family 11 (proton-coupled divalent metal ion transporters), member 2 [Source:MGI Symbol;Acc:MGI:1345279]
ENSMUST00000023776	11.5241	-0.375013	0.516408	-0.726194	0.46772	0.716165	11.7337	6.41845	11.4329	13.637	16.7418	9.18095	Slc4a8	ENSMUSG00000023032	solute carrier family 4 (anion exchanger), member 8 [Source:MGI Symbol;Acc:MGI:1928745]
ENSMUST00000023781	46.8757	-0.610702	0.266549	-2.29114	0.0219551	0.109246	30.312	33.3759	46.6109	63.3149	61.7355	45.9048	Krt88	ENSMUSG00000063971	keratin 88 [Source:MGI Symbol;Acc:MGI:1913572]
ENSMUST00000023803	0.33674	-1.80881	4.02839	-0.449015	0.65342	NA	0	0	0	0.974075	1.04637	0	Krt18	ENSMUSG00000023043	keratin 18 [Source:MGI Symbol;Acc:MGI:96692]
ENSMUST00000023805	0.471889	0.940329	3.70719	0.25365	0.799766	NA	0.977805	0	0.879451	0.974075	0	0	Csad	ENSMUSG00000023044	cysteine sulfinic acid decarboxylase [Source:MGI Symbol;Acc:MGI:2180098]
ENSMUST00000023807	12.638	0.255962	0.490422	0.521922	0.601725	0.806212	13.6893	11.5532	15.8301	6.81852	15.6955	12.2413	Igfbp6	ENSMUSG00000023046	insulin-like growth factor binding protein 6 [Source:MGI Symbol;Acc:MGI:96441]
ENSMUST00000023812	1364.17	1.29545	0.0760997	17.0231	5.53333e-65	2.04034e-62	1909.65	1967.9	1934.79	844.523	815.118	713.054	Map3k12	ENSMUSG00000023050	mitogen-activated protein kinase kinase kinase 12 [Source:MGI Symbol;Acc:MGI:1346881]
ENSMUST00000023814	0.439726	2.40092	4.00909	0.598869	0.54926	NA	0	0	2.63835	0	0	0	Npff	ENSMUSG00000023052	neuropeptide FF-amide peptide precursor [Source:MGI Symbol;Acc:MGI:1891708]
ENSMUST00000023820	13.5177	0.521948	0.482562	1.08162	0.279422	0.550208	17.6005	14.1206	15.8301	17.5333	8.37092	7.65079	Fabp2	ENSMUSG00000023057	fatty acid binding protein 2, intestinal [Source:MGI Symbol;Acc:MGI:95478]
ENSMUST00000023828	0.255026	-1.46206	4.06074	-0.360047	0.718812	NA	0	0	0	0	0	1.53016	Rttn	ENSMUSG00000023066	rotatin [Source:MGI Symbol;Acc:MGI:2179288]
ENSMUST00000023830	14.4987	0.805216	0.492102	1.63628	0.101782	0.304997	22.4895	21.8227	11.4329	15.5852	4.18546	11.4762	Nus1	ENSMUSG00000023068	NUS1 dehydrodolichyl diphosphate synthase subunit [Source:MGI Symbol;Acc:MGI:1196365]
ENSMUST00000023835	0.437056	0.939019	3.84036	0.244513	0.806833	NA	0.977805	0	0.879451	0	0	0.765079	Slc10a2	ENSMUSG00000023073	solute carrier family 10, member 2 [Source:MGI Symbol;Acc:MGI:1201406]
ENSMUST00000023845	6.19211	-0.908575	0.734845	-1.23642	0.216304	NA	2.93341	7.70214	2.63835	10.7148	6.27819	6.88572	H2-M10.2	ENSMUSG00000023083	histocompatibility 2, M region locus 10.2 [Source:MGI Symbol;Acc:MGI:1276525]
ENSMUST00000023846	32.4678	-0.132845	0.30911	-0.429766	0.667366	0.845339	37.1566	21.8227	33.4192	38.963	28.2519	35.1937	Lrrc71	ENSMUSG00000023084	leucine rich repeat containing 71 [Source:MGI Symbol;Acc:MGI:1921735]
ENSMUST00000023851	5.34036	0.447733	0.849743	0.526904	0.59826	NA	3.91122	3.85107	10.5534	0	8.37092	5.35556	Ndufa5	ENSMUSG00000023089	NADH:ubiquinone oxidoreductase subunit A5 [Source:MGI Symbol;Acc:MGI:1915452]
ENSMUST00000023856	0.429421	-2.18309	4.00096	-0.545642	0.585312	NA	0	0	0	0	1.04637	1.53016	Msrb2	ENSMUSG00000023094	methionine sulfoxide reductase B2 [Source:MGI Symbol;Acc:MGI:1923717]
ENSMUST00000023867	27.3181	-0.325782	0.358412	-0.90896	0.363371	0.633278	21.5117	15.4043	35.1781	37.9889	20.9273	32.8984	Rfc2	ENSMUSG00000023104	replication factor C (activator 1) 2 [Source:MGI Symbol;Acc:MGI:1341868]
ENSMUST00000023869	5.04558	0.706275	0.856501	0.824605	0.409596	NA	3.91122	7.70214	7.03561	8.76667	2.09273	0.765079	Denr	ENSMUSG00000023106	density-regulated protein [Source:MGI Symbol;Acc:MGI:1915434]
ENSMUST00000023873	6.38511	0.307287	0.69034	0.445124	0.65623	NA	6.84463	6.41845	7.91506	2.92222	7.32456	6.88572	Prmt5	ENSMUSG00000023110	protein arginine N-methyltransferase 5 [Source:MGI Symbol;Acc:MGI:1351645]
ENSMUST00000023882	0.488902	2.53872	3.9999	0.634697	0.525626	NA	2.93341	0	0	0	0	0	Sympk	ENSMUSG00000023118	symplekin [Source:MGI Symbol;Acc:MGI:1915438]
ENSMUST00000023886	0.417994	-0.500283	4.06074	-0.1232	0.901949	NA	0.977805	0	0	0	0	1.53016	Sult1c2	ENSMUSG00000023122	sulfotransferase family, cytosolic, 1C, member 2 [Source:MGI Symbol;Acc:MGI:1916333]
ENSMUST00000023917	0.420664	0.884442	4.0531	0.218214	0.827262	NA	0	0	1.7589	0	0	0.765079	Lrrc69	ENSMUSG00000023151	leucine rich repeat containing 69 [Source:MGI Symbol;Acc:MGI:1920564]
ENSMUST00000023918	5.04879	0.502293	0.806266	0.622986	0.533294	NA	5.86683	7.70214	4.39726	0.974075	5.23183	6.12064	Ivns1abp	ENSMUSG00000023150	influenza virus NS1A binding protein [Source:MGI Symbol;Acc:MGI:2152389]
ENSMUST00000023924	2.71411	-2.22936	1.29922	-1.71593	0.0861752	NA	0	0	2.63835	4.87037	4.18546	4.59048	Rpp14	ENSMUSG00000023156	ribonuclease P 14 subunit [Source:MGI Symbol;Acc:MGI:1914303]
ENSMUST00000023934	1.38059	1.17537	1.78249	0.659398	0.50964	NA	0.977805	1.28369	3.51781	0.974075	0	1.53016	Hbb-bs	ENSMUSG00000052305	hemoglobin, beta adult s chain [Source:MGI Symbol;Acc:MGI:5474852]
ENSMUST00000023952	15.7809	0.108128	0.445764	0.242569	0.808339	0.914654	23.4673	11.5532	14.0712	17.5333	10.4637	17.5968	Krt8	ENSMUSG00000049382	keratin 8 [Source:MGI Symbol;Acc:MGI:96705]
ENSMUST00000023965	4.66823	-0.252584	0.831065	-0.303929	0.761182	NA	7.82244	1.28369	3.51781	5.84445	4.18546	5.35556	Cfhr1	ENSMUSG00000057037	complement factor H-related 1 [Source:MGI Symbol;Acc:MGI:2138169]
ENSMUST00000024011	14.2056	0.133979	0.487763	0.27468	0.783562	0.904724	22.4895	15.4043	7.03561	15.5852	9.41729	15.3016	Kcnk5	ENSMUSG00000023243	potassium channel, subfamily K, member 5 [Source:MGI Symbol;Acc:MGI:1336175]
ENSMUST00000024015	1.33188	0.90071	1.82423	0.493748	0.621484	NA	0	2.56738	2.63835	0.974075	1.04637	0.765079	Guca2a	ENSMUSG00000023247	guanylate cyclase activator 2a (guanylin) [Source:MGI Symbol;Acc:MGI:102738]
ENSMUST00000024032	4.71723	0.427467	0.839852	0.508979	0.610767	NA	7.82244	5.13476	3.51781	3.8963	1.04637	6.88572	9530002B09Rik	ENSMUSG00000023263	RIKEN cDNA 9530002B09 gene [Source:MGI Symbol;Acc:MGI:1924682]
ENSMUST00000024042	116.135	-0.145141	0.162653	-0.892331	0.372216	0.63956	110.492	103.979	116.088	113.967	124.517	127.768	Creld2	ENSMUSG00000023272	cysteine-rich with EGF-like domains 2 [Source:MGI Symbol;Acc:MGI:1923987]
ENSMUST00000024044	0.651004	1.65992	2.92685	0.567135	0.570623	NA	0.977805	1.28369	0.879451	0	0	0.765079	Cd4	ENSMUSG00000023274	CD4 antigen [Source:MGI Symbol;Acc:MGI:88335]
ENSMUST00000024078	0.849117	-0.633396	2.93989	-0.215449	0.829417	NA	1.95561	0	0	0	3.1391	0	2022-03-05	ENSMUSG00000023307	membrane-associated ring finger (C3HC4) 5 [Source:MGI Symbol;Acc:MGI:1915207]
ENSMUST00000024107	0.888672	0.664414	2.64558	0.251141	0.801705	NA	1.95561	1.28369	0	0	2.09273	0	Wfdc1	ENSMUSG00000023336	WAP four-disulfide core domain 1 [Source:MGI Symbol;Acc:MGI:1915116]
ENSMUST00000024119	2.94042	-0.593738	1.06583	-0.557064	0.577484	NA	0.977805	2.56738	3.51781	3.8963	2.09273	4.59048	Trip6	ENSMUSG00000023348	thyroid hormone receptor interactor 6 [Source:MGI Symbol;Acc:MGI:1343458]
ENSMUST00000024200	8.13162	-1.85224	0.690265	-2.68338	0.00728816	NA	4.88902	5.13476	0.879451	10.7148	15.6955	11.4762	Cela3a	ENSMUSG00000078520	chymotrypsin-like elastase family, member 3A [Source:MGI Symbol;Acc:MGI:3651647]
ENSMUST00000024260	13.6184	1.02061	0.515215	1.98093	0.0475988	0.186927	10.7559	16.688	27.263	13.637	4.18546	9.18095	Pcbp4	ENSMUSG00000023495	poly(rC) binding protein 4 [Source:MGI Symbol;Acc:MGI:1890471]
ENSMUST00000024270	39.4029	-0.652151	0.279319	-2.33479	0.0195544	0.100438	35.201	28.2412	28.1424	53.5741	49.1792	42.0794	Cdca3	ENSMUSG00000023505	cell division cycle associated 3 [Source:MGI Symbol;Acc:MGI:1315198]
ENSMUST00000024338	0.301907	-1.66764	4.04066	-0.412715	0.679815	NA	0	0	0	0	1.04637	0.765079	C1qtnf12	ENSMUSG00000023571	C1q and tumor necrosis factor related 12 [Source:MGI Symbol;Acc:MGI:1914639]
ENSMUST00000024575	13.9956	0.113728	0.458833	0.247864	0.80424	0.91247	16.6227	16.688	10.5534	11.6889	14.6491	13.7714	Rps6ka2	ENSMUSG00000023809	ribosomal protein S6 kinase, polypeptide 2 [Source:MGI Symbol;Acc:MGI:1342290]
ENSMUST00000024599	20.0296	-0.545659	0.392876	-1.38888	0.164868	0.409162	16.6227	11.5532	20.2274	29.2222	18.8346	23.7175	Igf2r	ENSMUSG00000023830	insulin-like growth factor 2 receptor [Source:MGI Symbol;Acc:MGI:96435]
ENSMUST00000024620	1.34355	0.041327	1.78901	0.0231005	0.98157	NA	0.977805	1.28369	1.7589	1.94815	2.09273	0	Riok2	ENSMUSG00000116564	RIO kinase 2 [Source:MGI Symbol;Acc:MGI:1914295]
ENSMUST00000024627	2.81942	-0.164959	1.10648	-0.149085	0.881487	NA	4.88902	1.28369	1.7589	0.974075	4.18546	3.8254	Chd1	ENSMUSG00000023852	chromodomain helicase DNA binding protein 1 [Source:MGI Symbol;Acc:MGI:88393]
ENSMUST00000024657	0.926982	-0.283715	2.58553	-0.109732	0.912622	NA	0	2.56738	0	1.94815	1.04637	0	Phf10	ENSMUSG00000023883	PHD finger protein 10 [Source:MGI Symbol;Acc:MGI:1919307]
ENSMUST00000024702	89.8223	-0.241945	0.202412	-1.19531	0.231965	0.498053	70.402	84.7235	92.3424	113.967	71.1528	106.346	Paqr4	ENSMUSG00000023909	progestin and adipoQ receptor family member IV [Source:MGI Symbol;Acc:MGI:1923748]
ENSMUST00000024705	6.05615	1.02173	0.719195	1.42066	0.155417	NA	6.84463	7.70214	9.67397	4.87037	4.18546	3.06032	Slc25a27	ENSMUSG00000023912	solute carrier family 25, member 27 [Source:MGI Symbol;Acc:MGI:1921261]
ENSMUST00000024706	1.87698	-0.38519	1.56576	-0.246009	0.805675	NA	0	5.13476	0	0.974075	2.09273	3.06032	Pla2g7	ENSMUSG00000023913	phospholipase A2, group VII (platelet-activating factor acetylhydrolase, plasma) [Source:MGI Symbol;Acc:MGI:1351327]
ENSMUST00000024708	1.97472	-0.934096	1.44108	-0.64819	0.516862	NA	1.95561	1.28369	0.879451	0	3.1391	4.59048	Tnfrsf21	ENSMUSG00000023915	tumor necrosis factor receptor superfamily, member 21 [Source:MGI Symbol;Acc:MGI:2151075]
ENSMUST00000024725	4.8234	0.249891	1.38012	0.181064	0.856317	NA	9.77805	5.13476	0.879451	7.7926	0	5.35556	Efhb	ENSMUSG00000023931	EF hand domain family, member B [Source:MGI Symbol;Acc:MGI:3045296]
ENSMUST00000024727	12.75	0.0225091	0.495264	0.0454488	0.96375	0.983544	9.77805	20.539	8.79451	13.637	11.51	12.2413	Cdc5l	ENSMUSG00000023932	cell division cycle 5-like (S. pombe) [Source:MGI Symbol;Acc:MGI:1918952]
ENSMUST00000024731	2.08363	-2.26624	1.51429	-1.49657	0.134505	NA	0.977805	1.28369	0	1.94815	5.23183	3.06032	Spats1	ENSMUSG00000023935	spermatogenesis associated, serine-rich 1 [Source:MGI Symbol;Acc:MGI:1918270]
ENSMUST00000024733	5.03753	0.190179	0.919588	0.206809	0.836159	NA	2.93341	12.8369	0.879451	0.974075	4.18546	8.41587	Aars2	ENSMUSG00000023938	alanyl-tRNA synthetase 2, mitochondrial [Source:MGI Symbol;Acc:MGI:2681839]
ENSMUST00000024736	7.67168	0.494504	0.627651	0.787865	0.430776	NA	5.86683	11.5532	9.67397	6.81852	5.23183	6.88572	Sgo1	ENSMUSG00000023940	shugoshin 1 [Source:MGI Symbol;Acc:MGI:1919665]
ENSMUST00000024739	40.5562	-0.0237925	0.282432	-0.0842417	0.932864	0.969249	31.2898	38.5107	50.1287	37.9889	50.2255	35.1937	Hsp90ab1	ENSMUSG00000023944	heat shock protein 90 alpha (cytosolic), class B member 1 [Source:MGI Symbol;Acc:MGI:96247]
ENSMUST00000024749	2.12509	-2.35445	1.59634	-1.4749	0.140239	NA	0	1.28369	0.879451	0	5.23183	5.35556	Polh	ENSMUSG00000023953	polymerase (DNA directed), eta (RAD 30 related) [Source:MGI Symbol;Acc:MGI:1891457]
ENSMUST00000024755	1.49527	-0.696449	1.78888	-0.389321	0.697039	NA	0.977805	2.56738	0	3.8963	0	1.53016	Clic5	ENSMUSG00000023959	chloride intracellular channel 5 [Source:MGI Symbol;Acc:MGI:1917912]
ENSMUST00000024761	4.16553	-0.00608406	0.910822	-0.00667975	0.99467	NA	2.93341	2.56738	7.03561	1.94815	2.09273	8.41587	Fbxl17	ENSMUSG00000023965	F-box and leucine-rich repeat protein 17 [Source:MGI Symbol;Acc:MGI:1354704]
ENSMUST00000024762	18.1445	-0.534334	0.404753	-1.32015	0.186786	0.441299	11.7337	14.1206	18.4685	21.4296	20.9273	22.1873	Rsph9	ENSMUSG00000023966	radial spoke head 9 homolog (Chlamydomonas) [Source:MGI Symbol;Acc:MGI:1922814]
ENSMUST00000024763	0.732876	3.13441	3.43701	0.911959	0.36179	NA	0	0	4.39726	0	0	0	Mrps18a	ENSMUSG00000023967	mitochondrial ribosomal protein S18A [Source:MGI Symbol;Acc:MGI:1915815]
ENSMUST00000024779	7.67872	-0.620289	0.696011	-0.891206	0.372819	NA	0.977805	10.2695	7.03561	11.6889	11.51	4.59048	Usp49	ENSMUSG00000090115	ubiquitin specific peptidase 49 [Source:MGI Symbol;Acc:MGI:2685391]
ENSMUST00000024783	316.522	-0.182469	0.125325	-1.45597	0.145402	0.37969	281.608	301.667	304.29	356.511	381.923	273.133	Bysl	ENSMUSG00000023988	bystin-like [Source:MGI Symbol;Acc:MGI:1858419]
ENSMUST00000024811	56.7911	0.203102	0.251322	0.808135	0.419013	0.676407	47.9124	73.1703	62.4411	37.0148	54.411	65.7968	Pim1	ENSMUSG00000024014	proviral integration site 1 [Source:MGI Symbol;Acc:MGI:97584]
ENSMUST00000024816	12.1167	-0.462978	0.500796	-0.924485	0.355234	0.624378	12.7115	5.13476	12.3123	13.637	13.6027	15.3016	Cmtr1	ENSMUSG00000024019	cap methyltransferase 1 [Source:MGI Symbol;Acc:MGI:1921407]
ENSMUST00000024817	4.04704	2.03265	1.05265	1.931	0.0534835	NA	1.95561	7.70214	9.67397	0	4.18546	0.765079	Rnf8	ENSMUSG00000090083	ring finger protein 8 [Source:MGI Symbol;Acc:MGI:1929069]
ENSMUST00000024826	0.933228	-1.97165	2.41619	-0.816017	0.41449	NA	0	1.28369	0	0.974075	1.04637	2.29524	Tff2	ENSMUSG00000024028	trefoil factor 2 (spasmolytic protein 1) [Source:MGI Symbol;Acc:MGI:1306805]
ENSMUST00000024829	1.77912	-0.402117	1.54384	-0.260466	0.794505	NA	0.977805	3.85107	0	0.974075	1.04637	3.8254	Abcg1	ENSMUSG00000024030	ATP binding cassette subfamily G member 1 [Source:MGI Symbol;Acc:MGI:107704]
ENSMUST00000024832	0.721047	3.07952	3.15819	0.975088	0.329517	NA	0	2.56738	1.7589	0	0	0	Rsph1	ENSMUSG00000024033	radial spoke head 1 homolog (Chlamydomonas) [Source:MGI Symbol;Acc:MGI:1194909]
ENSMUST00000024839	12.3052	0.917253	0.547306	1.67594	0.0937495	0.29011	9.77805	29.5249	9.67397	6.81852	7.32456	10.7111	Sik1	ENSMUSG00000024042	salt inducible kinase 1 [Source:MGI Symbol;Acc:MGI:104754]
ENSMUST00000024840	1.65058	0.877492	1.57448	0.557321	0.577308	NA	1.95561	0	4.39726	0.974075	1.04637	1.53016	Arhgap28	ENSMUSG00000024043	Rho GTPase activating protein 28 [Source:MGI Symbol;Acc:MGI:2147003]
ENSMUST00000024857	1.7866	-0.300745	1.58005	-0.190339	0.849044	NA	0	1.28369	3.51781	0	2.09273	3.8254	Lbh	ENSMUSG00000024063	limb-bud and heart [Source:MGI Symbol;Acc:MGI:1925139]
ENSMUST00000024860	2.15516	-0.556654	1.38315	-0.402454	0.68735	NA	3.91122	1.28369	0	0.974075	5.23183	1.53016	Ehd3	ENSMUSG00000024065	EH-domain containing 3 [Source:MGI Symbol;Acc:MGI:1928900]
ENSMUST00000024869	11.954	0.606491	0.504708	1.20167	0.229492	0.494715	11.7337	12.8369	18.4685	12.663	8.37092	7.65079	Spast	ENSMUSG00000024068	spastin [Source:MGI Symbol;Acc:MGI:1858896]
ENSMUST00000024870	1.0757	-1.239	2.09094	-0.592559	0.553476	NA	0.977805	0	0.879451	0.974075	2.09273	1.53016	Slc30a6	ENSMUSG00000024069	solute carrier family 30 (zinc transporter), member 6 [Source:MGI Symbol;Acc:MGI:2386741]
ENSMUST00000024880	0.255026	-1.46206	4.06074	-0.360047	0.718812	NA	0	0	0	0	0	1.53016	Vit	ENSMUSG00000024076	vitrin [Source:MGI Symbol;Acc:MGI:1921449]
ENSMUST00000024884	11.4832	-0.256477	0.530347	-0.483601	0.628669	0.822033	16.6227	3.85107	10.5534	13.637	10.4637	13.7714	Eif2ak2	ENSMUSG00000024079	eukaryotic translation initiation factor 2-alpha kinase 2 [Source:MGI Symbol;Acc:MGI:1353449]
ENSMUST00000024885	10.2335	-0.0287603	0.551616	-0.0521383	0.958419	0.982106	14.6671	7.70214	7.91506	14.6111	7.32456	9.18095	Cebpz	ENSMUSG00000024081	CCAAT/enhancer binding protein zeta [Source:MGI Symbol;Acc:MGI:109386]
ENSMUST00000024894	0.948812	0.0395906	2.34956	0.0168502	0.986556	NA	1.95561	0	0.879451	0	2.09273	0.765079	Cyp1b1	ENSMUSG00000024087	cytochrome P450, family 1, subfamily b, polypeptide 1 [Source:MGI Symbol;Acc:MGI:88590]
ENSMUST00000024897	12.612	-0.0566676	0.518052	-0.109386	0.912896	0.961059	18.5783	5.13476	13.1918	14.6111	7.32456	16.8317	Vapa	ENSMUSG00000024091	vesicle-associated membrane protein, associated protein A [Source:MGI Symbol;Acc:MGI:1353561]
ENSMUST00000024905	0.437056	0.939019	3.84036	0.244513	0.806833	NA	0.977805	0	0.879451	0	0	0.765079	Ralbp1	ENSMUSG00000024096	ralA binding protein 1 [Source:MGI Symbol;Acc:MGI:108466]
ENSMUST00000024906	3.6858	0.0343438	0.908645	0.0377967	0.96985	NA	2.93341	3.85107	4.39726	2.92222	4.18546	3.8254	Twsg1	ENSMUSG00000024098	twisted gastrulation BMP signaling modulator 1 [Source:MGI Symbol;Acc:MGI:2137520]
ENSMUST00000024909	0.255026	-1.46206	4.06074	-0.360047	0.718812	NA	0	0	0	0	0	1.53016	Ndufv2	ENSMUSG00000024099	NADH:ubiquinone oxidoreductase core subunit V2 [Source:MGI Symbol;Acc:MGI:1920150]
ENSMUST00000024916	1.02227	-3.40991	2.58115	-1.32108	0.186474	NA	0	0	0	1.94815	4.18546	0	Lhcgr	ENSMUSG00000024107	luteinizing hormone/choriogonadotropin receptor [Source:MGI Symbol;Acc:MGI:96783]
ENSMUST00000024928	37.5256	-0.417616	0.294236	-1.41932	0.155805	0.394781	40.09	28.2412	28.1424	32.1445	46.0401	50.4952	Prss21	ENSMUSG00000024116	protease, serine 21 [Source:MGI Symbol;Acc:MGI:1916698]
ENSMUST00000024944	39.999	0.187341	0.275373	0.680317	0.496304	0.735122	48.8902	42.3618	36.937	40.9111	30.3446	40.5492	Slc3a1	ENSMUSG00000024131	solute carrier family 3, member 1 [Source:MGI Symbol;Acc:MGI:1195264]
ENSMUST00000024954	22.8737	-0.0749414	0.395056	-0.189698	0.849546	0.93354	31.2898	15.4043	20.2274	13.637	23.02	33.6635	Epas1	ENSMUSG00000024140	endothelial PAS domain protein 1 [Source:MGI Symbol;Acc:MGI:109169]
ENSMUST00000024956	104.024	0.196437	0.192225	1.02191	0.306824	0.579721	85.069	111.681	136.315	112.019	82.6628	96.4	Rhoq	ENSMUSG00000024143	ras homolog family member Q [Source:MGI Symbol;Acc:MGI:1931553]
ENSMUST00000024957	56.0171	0.0463362	0.249155	0.185974	0.852465	0.934596	65.5129	59.0497	45.7315	64.2889	61.7355	39.7841	Pigf	ENSMUSG00000024145	phosphatidylinositol glycan anchor biosynthesis, class F [Source:MGI Symbol;Acc:MGI:99462]
ENSMUST00000024959	4.85626	1.20272	0.824406	1.45889	0.144594	NA	4.88902	7.70214	7.91506	1.94815	2.09273	4.59048	Cript	ENSMUSG00000024146	cysteine-rich PDZ-binding protein [Source:MGI Symbol;Acc:MGI:1929655]
ENSMUST00000024967	2.76033	-0.780525	1.11972	-0.69707	0.485759	NA	2.93341	1.28369	1.7589	4.87037	4.18546	1.53016	Msh2	ENSMUSG00000024151	mutS homolog 2 [Source:MGI Symbol;Acc:MGI:101816]
ENSMUST00000024970	47.8358	0.152737	0.265581	0.575105	0.56522	0.784346	54.7571	53.915	43.0931	57.4704	30.3446	47.4349	Gtf2a1l	ENSMUSG00000024154	general transcription factor IIA, 1-like [Source:MGI Symbol;Acc:MGI:1919078]
ENSMUST00000024976	3.20553	0.958879	1.11918	0.856773	0.39157	NA	3.91122	8.98583	0	1.94815	2.09273	2.29524	Spsb3	ENSMUSG00000024160	splA/ryanodine receptor domain and SOCS box containing 3 [Source:MGI Symbol;Acc:MGI:1891471]
ENSMUST00000024981	3.02823	-1.50318	1.16664	-1.28847	0.197583	NA	1.95561	0	2.63835	0.974075	4.18546	8.41587	Jpt2	ENSMUSG00000024165	Jupiter microtubule associated homolog 2 [Source:MGI Symbol;Acc:MGI:1196260]
ENSMUST00000024984	1.11116	-0.372389	2.01599	-0.184718	0.85345	NA	1.95561	0	0.879451	0.974075	2.09273	0.765079	Tmem204	ENSMUSG00000024168	transmembrane protein 204 [Source:MGI Symbol;Acc:MGI:3039635]
ENSMUST00000024988	12.2582	0.153695	0.506881	0.303216	0.761725	0.893761	16.6227	14.1206	7.91506	13.637	13.6027	7.65079	C3	ENSMUSG00000024164	complement component 3 [Source:MGI Symbol;Acc:MGI:88227]
ENSMUST00000025003	2.51577	1.24986	1.19314	1.04753	0.294854	NA	4.88902	1.28369	4.39726	1.94815	1.04637	1.53016	Sox8	ENSMUSG00000024176	SRY (sex determining region Y)-box 8 [Source:MGI Symbol;Acc:MGI:98370]
ENSMUST00000025004	0.522869	1.11235	3.5324	0.3149	0.752838	NA	0	1.28369	0.879451	0.974075	0	0	Adgre4	ENSMUSG00000032915	adhesion G protein-coupled receptor E4 [Source:MGI Symbol;Acc:MGI:1196464]
ENSMUST00000025027	1.32542	-1.56098	2.12529	-0.734476	0.462659	NA	1.95561	0	0	0	5.23183	0.765079	Cuta	ENSMUSG00000024194	cutA divalent cation tolerance homolog [Source:MGI Symbol;Acc:MGI:1914925]
ENSMUST00000025046	2.95941	-1.41458	1.12005	-1.26296	0.206604	NA	1.95561	0	2.63835	4.87037	5.23183	3.06032	Ip6k3	ENSMUSG00000024210	inositol hexaphosphate kinase 3 [Source:MGI Symbol;Acc:MGI:3045325]
ENSMUST00000025048	192.544	-0.189611	0.132481	-1.43124	0.152362	0.38958	198.494	164.312	175.89	208.452	206.134	201.981	1700061G19Rik	ENSMUSG00000024209	RIKEN cDNA 1700061G19 gene [Source:MGI Symbol;Acc:MGI:1925875]
ENSMUST00000025050	0.804812	3.22148	2.99574	1.07536	0.282215	NA	0.977805	3.85107	0	0	0	0	Nudt3	ENSMUSG00000024213	nudix (nucleotide diphosphate linked moiety X)-type motif 3 [Source:MGI Symbol;Acc:MGI:1928484]
ENSMUST00000025053	83.0725	0.179994	0.200352	0.898387	0.36898	0.63729	79.2022	88.5746	97.6191	63.3149	76.3846	93.3397	Mllt1	ENSMUSG00000024212	myeloid/lymphoid or mixed-lineage leukemia; translocated to, 1 [Source:MGI Symbol;Acc:MGI:1927238]
ENSMUST00000025064	8.36615	-0.352405	0.604943	-0.582543	0.560201	NA	8.80024	5.13476	7.91506	5.84445	12.5564	9.94603	Pdzph1	ENSMUSG00000024227	PDZ and pleckstrin homology domains 1 [Source:MGI Symbol;Acc:MGI:1916489]
ENSMUST00000025065	3.12999	-0.597616	1.02453	-0.583308	0.559686	NA	1.95561	3.85107	1.7589	2.92222	5.23183	3.06032	Nudt12	ENSMUSG00000024228	nudix (nucleoside diphosphate linked moiety X)-type motif 12 [Source:MGI Symbol;Acc:MGI:1915243]
ENSMUST00000025075	38.6944	-0.0541961	0.282094	-0.192121	0.847648	0.932426	36.1788	30.8086	46.6109	36.0408	36.6228	45.9048	Bambi	ENSMUSG00000024232	BMP and activin membrane-bound inhibitor [Source:MGI Symbol;Acc:MGI:1915260]
ENSMUST00000025076	0.325313	0.167149	4.08047	0.0409631	0.967325	NA	0.977805	0	0	0.974075	0	0	Lyzl1	ENSMUSG00000024233	lysozyme-like 1 [Source:MGI Symbol;Acc:MGI:1914578]
ENSMUST00000025081	4.28259	-0.644025	0.912094	-0.706095	0.480129	NA	2.93341	6.41845	0.879451	5.84445	7.32456	2.29524	Zeb1	ENSMUSG00000024238	zinc finger E-box binding homeobox 1 [Source:MGI Symbol;Acc:MGI:1344313]
ENSMUST00000025083	0.626599	-2.71653	3.1431	-0.864285	0.387432	NA	0	0	0	1.94815	1.04637	0.765079	Kif5b	ENSMUSG00000006740	kinesin family member 5B [Source:MGI Symbol;Acc:MGI:1098268]
ENSMUST00000025101	13.6331	-0.392234	0.502229	-0.780987	0.43481	0.691031	16.6227	11.5532	7.03561	21.4296	16.7418	8.41587	Dync2li1	ENSMUSG00000024253	dynein cytoplasmic 2 light intermediate chain 1 [Source:MGI Symbol;Acc:MGI:1913996]
ENSMUST00000025137	33.7506	0.220757	0.318791	0.692482	0.488635	0.730398	39.1122	38.5107	30.7808	33.1185	41.8546	19.127	Thoc1	ENSMUSG00000024287	THO complex 1 [Source:MGI Symbol;Acc:MGI:1919668]
ENSMUST00000025170	4.72935	0.0308784	0.838835	0.0368111	0.970636	NA	5.86683	5.13476	3.51781	0.974075	5.23183	7.65079	Wdr46	ENSMUSG00000024312	WD repeat domain 46 [Source:MGI Symbol;Acc:MGI:1931871]
ENSMUST00000025178	6.44185	-0.105059	0.711523	-0.147654	0.882616	NA	6.84463	3.85107	7.91506	8.76667	2.09273	9.18095	Vps52	ENSMUSG00000024319	VPS52 GARP complex subunit [Source:MGI Symbol;Acc:MGI:1330304]
ENSMUST00000025202	4.00898	0.517127	0.93236	0.554643	0.579139	NA	5.86683	7.70214	0.879451	2.92222	2.09273	4.59048	Kcnc1	ENSMUSG00000058975	potassium voltage gated channel, Shaw-related subfamily, member 1 [Source:MGI Symbol;Acc:MGI:96667]
ENSMUST00000025208	10.1464	0.324905	0.542257	0.599171	0.549059	0.772121	9.77805	11.5532	12.3123	7.7926	12.5564	6.88572	Dnajc18	ENSMUSG00000024350	DnaJ heat shock protein family (Hsp40) member C18 [Source:MGI Symbol;Acc:MGI:1923844]
ENSMUST00000025212	11.315	-0.013646	0.525455	-0.0259699	0.979281	0.992168	5.86683	14.1206	14.0712	11.6889	8.37092	13.7714	Slc23a1	ENSMUSG00000024354	solute carrier family 23 (nucleobase transporters), member 1 [Source:MGI Symbol;Acc:MGI:1341903]
ENSMUST00000025217	134.421	-0.0940941	0.167484	-0.56181	0.574246	0.789785	108.536	141.206	141.592	150.982	111.961	152.251	Hspa9	ENSMUSG00000024359	heat shock protein 9 [Source:MGI Symbol;Acc:MGI:96245]
ENSMUST00000025218	210.866	0.811643	0.130666	6.21161	5.24458e-10	1.44092e-08	278.674	274.71	253.282	135.396	163.233	159.902	Etf1	ENSMUSG00000024360	eukaryotic translation termination factor 1 [Source:MGI Symbol;Acc:MGI:2385071]
ENSMUST00000025223	0.417372	-2.14718	4.0033	-0.536353	0.591715	NA	0	0	0	0.974075	0	1.53016	Cyp21a1	ENSMUSG00000024365	cytochrome P450, family 21, subfamily a, polypeptide 1 [Source:MGI Symbol;Acc:MGI:88591]
ENSMUST00000025228	86.4393	-0.253978	0.193294	-1.31395	0.188865	0.443668	63.5573	83.4398	89.7041	86.6927	97.3119	97.9302	Cdc23	ENSMUSG00000024370	CDC23 cell division cycle 23 [Source:MGI Symbol;Acc:MGI:1098815]
ENSMUST00000025234	2.18891	-0.631078	1.34785	-0.468211	0.639634	NA	3.91122	1.28369	0	0.974075	3.1391	3.8254	Epb41l4a	ENSMUSG00000024376	erythrocyte membrane protein band 4.1 like 4a [Source:MGI Symbol;Acc:MGI:103007]
ENSMUST00000025236	5.11944	0.426036	0.804841	0.529343	0.596568	NA	5.86683	6.41845	5.27671	8.76667	2.09273	2.29524	Stard4	ENSMUSG00000024378	StAR-related lipid transfer (START) domain containing 4 [Source:MGI Symbol;Acc:MGI:2156764]
ENSMUST00000025243	24.6414	-0.0491533	0.378364	-0.12991	0.896638	0.955849	27.3785	25.6738	19.3479	16.5593	39.7619	19.127	Iws1	ENSMUSG00000024384	IWS1, SUPT6 interacting protein [Source:MGI Symbol;Acc:MGI:1920723]
ENSMUST00000025249	0.467545	0.884442	4.0531	0.218214	0.827262	NA	0	0	1.7589	0	1.04637	0	Apom	ENSMUSG00000024391	apolipoprotein M [Source:MGI Symbol;Acc:MGI:1930124]
ENSMUST00000025250	0.29315	1.84622	4.0531	0.45551	0.648743	NA	0	0	1.7589	0	0	0	Bag6	ENSMUSG00000024392	BCL2-associated athanogene 6 [Source:MGI Symbol;Acc:MGI:1919439]
ENSMUST00000025253	0.38254	-2.03581	4.01094	-0.507563	0.61176	NA	0	0	0	0	0	2.29524	Prrc2a	ENSMUSG00000024393	proline-rich coiled-coil 2A [Source:MGI Symbol;Acc:MGI:1915467]
ENSMUST00000025254	2.0263	-1.6522	1.56862	-1.05328	0.292214	NA	1.95561	0	0.879451	7.7926	0	1.53016	Lims2	ENSMUSG00000024395	LIM and senescent cell antigen like domains 2 [Source:MGI Symbol;Acc:MGI:2385067]
ENSMUST00000025264	81.4673	-0.470064	0.199665	-2.35427	0.0185593	0.0969624	72.3576	73.1703	60.6822	87.6667	84.7556	110.171	Wdr33	ENSMUSG00000024400	WD repeat domain 33 [Source:MGI Symbol;Acc:MGI:1921570]
ENSMUST00000025270	0.53864	-0.799848	3.77998	-0.211601	0.832418	NA	0	1.28369	0	1.94815	0	0	Riok3	ENSMUSG00000024404	RIO kinase 3 [Source:MGI Symbol;Acc:MGI:1914128]
ENSMUST00000025271	3.06765	0.701059	1.03761	0.675645	0.499266	NA	2.93341	5.13476	3.51781	1.94815	1.04637	3.8254	Pou5f1	ENSMUSG00000024406	POU domain, class 5, transcription factor 1 [Source:MGI Symbol;Acc:MGI:101893]
ENSMUST00000025273	1.26497	0.571213	1.98195	0.288208	0.773187	NA	1.95561	2.56738	0	0.974075	2.09273	0	Psors1c2	ENSMUSG00000024409	psoriasis susceptibility 1 candidate 2 (human) [Source:MGI Symbol;Acc:MGI:1930025]
ENSMUST00000025279	2.34629	-1.28182	1.25264	-1.02329	0.306169	NA	1.95561	1.28369	0.879451	1.94815	4.18546	3.8254	Npc1	ENSMUSG00000024413	NPC intracellular cholesterol transporter 1 [Source:MGI Symbol;Acc:MGI:1097712]
ENSMUST00000025290	1.66302	2.09488	1.78021	1.17676	0.23929	NA	5.86683	1.28369	0.879451	1.94815	0	0	Impact	ENSMUSG00000024423	impact, RWD domain protein [Source:MGI Symbol;Acc:MGI:1098233]
ENSMUST00000025295	4.1223	-0.929544	0.926105	-1.00371	0.315517	NA	3.91122	0	4.39726	4.87037	3.1391	8.41587	Spry4	ENSMUSG00000024427	sprouty RTK signaling antagonist 4 [Source:MGI Symbol;Acc:MGI:1345144]
ENSMUST00000025350	8.61568	-0.0555505	0.597293	-0.0930036	0.925901	NA	6.84463	11.5532	7.03561	6.81852	12.5564	6.88572	Dcp2	ENSMUSG00000024472	decapping mRNA 2 [Source:MGI Symbol;Acc:MGI:1917890]
ENSMUST00000025357	0.29315	1.84622	4.0531	0.45551	0.648743	NA	0	0	1.7589	0	0	0	Ap3s1	ENSMUSG00000024480	adaptor-related protein complex 3, sigma 1 subunit [Source:MGI Symbol;Acc:MGI:1337062]
ENSMUST00000025358	1.02069	1.52486	2.40997	0.63273	0.52691	NA	1.95561	0	2.63835	0	0	1.53016	Lvrn	ENSMUSG00000024481	laeverin [Source:MGI Symbol;Acc:MGI:1921824]
ENSMUST00000025364	20.8348	-0.252426	0.396378	-0.636832	0.524234	0.755365	29.3341	15.4043	12.3123	20.4556	23.02	24.4825	Yipf5	ENSMUSG00000024487	Yip1 domain family, member 5 [Source:MGI Symbol;Acc:MGI:1914430]
ENSMUST00000025377	0.417372	-2.14718	4.0033	-0.536353	0.591715	NA	0	0	0	0.974075	0	1.53016	Ppp2r2b	ENSMUSG00000024500	protein phosphatase 2, regulatory subunit B, beta [Source:MGI Symbol;Acc:MGI:1920180]
ENSMUST00000025385	15.5349	-0.0890025	0.44427	-0.200334	0.841219	0.930908	11.7337	21.8227	12.3123	14.6111	13.6027	19.127	Hsd17b4	ENSMUSG00000024507	hydroxysteroid (17-beta) dehydrogenase 4 [Source:MGI Symbol;Acc:MGI:105089]
ENSMUST00000025388	67.9281	-0.380026	0.21065	-1.80406	0.0712214	0.245466	61.6017	61.6171	54.526	78.9001	69.0601	81.8635	Ftmt	ENSMUSG00000024510	ferritin mitochondrial [Source:MGI Symbol;Acc:MGI:1914884]
ENSMUST00000025393	1.43213	-0.311315	1.71261	-0.181778	0.855757	NA	1.95561	0	1.7589	0.974075	3.1391	0.765079	Smad4	ENSMUSG00000024515	SMAD family member 4 [Source:MGI Symbol;Acc:MGI:894293]
ENSMUST00000025402	27.9152	0.510091	0.358107	1.42441	0.154328	0.392198	35.201	33.3759	30.7808	21.4296	11.51	35.1937	Gnal	ENSMUSG00000024524	guanine nucleotide binding protein, alpha stimulating, olfactory type [Source:MGI Symbol;Acc:MGI:95774]
ENSMUST00000025403	6.90488	1.46097	0.723405	2.01957	0.0434275	NA	10.7559	8.98583	10.5534	7.7926	1.04637	2.29524	Impa2	ENSMUSG00000024525	inositol (myo)-1(or 4)-monophosphatase 2 [Source:MGI Symbol;Acc:MGI:2149728]
ENSMUST00000025404	1.45262	-0.157634	1.61805	-0.097422	0.922391	NA	1.95561	1.28369	0.879451	0.974075	2.09273	1.53016	Cidea	ENSMUSG00000024526	cell death-inducing DNA fragmentation factor, alpha subunit-like effector A [Source:MGI Symbol;Acc:MGI:1270845]
ENSMUST00000025406	1.12693	-1.24944	2.14354	-0.582886	0.55997	NA	1.95561	0	0	1.94815	2.09273	0.765079	Srfbp1	ENSMUSG00000024528	serum response factor binding protein 1 [Source:MGI Symbol;Acc:MGI:1914472]
ENSMUST00000025408	7.76718	0.68882	0.635989	1.08307	0.278778	NA	11.7337	6.41845	10.5534	2.92222	7.32456	7.65079	Afg3l2	ENSMUSG00000024527	AFG3-like AAA ATPase 2 [Source:MGI Symbol;Acc:MGI:1916847]
ENSMUST00000025411	0.563948	-1.19087	3.36915	-0.353464	0.723741	NA	0	0	0.879451	0.974075	0	1.53016	Prelid3a	ENSMUSG00000024530	PRELI domain containing 3A [Source:MGI Symbol;Acc:MGI:2442865]
ENSMUST00000025419	0.429421	-2.18309	4.00096	-0.545642	0.585312	NA	0	0	0	0	1.04637	1.53016	Ppic	ENSMUSG00000024538	peptidylprolyl isomerase C [Source:MGI Symbol;Acc:MGI:97751]
ENSMUST00000025421	10.4329	-0.434544	0.540344	-0.804198	0.421282	0.678655	8.80024	5.13476	12.3123	9.74075	13.6027	13.0064	Seh1l	ENSMUSG00000079614	SEH1-like (S. cerevisiae [Source:MGI Symbol;Acc:MGI:1919374]
ENSMUST00000025425	13.5312	0.609985	0.464921	1.31202	0.189514	0.444356	14.6671	16.688	17.589	9.74075	12.5564	9.94603	Cep192	ENSMUSG00000024542	centrosomal protein 192 [Source:MGI Symbol;Acc:MGI:1918049]
ENSMUST00000025430	9.63144	-0.583094	0.600991	-0.970221	0.331937	0.602381	10.7559	8.98583	3.51781	18.5074	8.37092	7.65079	Setbp1	ENSMUSG00000024548	SET binding protein 1 [Source:MGI Symbol;Acc:MGI:1933199]
ENSMUST00000025439	8.36813	0.807634	0.674791	1.19687	0.231359	NA	4.88902	20.539	7.03561	8.76667	2.09273	6.88572	Me2	ENSMUSG00000024556	malic enzyme 2, NAD(+)-dependent, mitochondrial [Source:MGI Symbol;Acc:MGI:2147351]
ENSMUST00000025462	5.04953	0.874928	0.876552	0.998148	0.318208	NA	0.977805	11.5532	7.03561	2.92222	6.27819	1.53016	Rbfa	ENSMUSG00000024570	ribosome binding factor A [Source:MGI Symbol;Acc:MGI:1915981]
ENSMUST00000025472	0.809872	1.96602	2.79542	0.7033	0.481869	NA	2.93341	0	0.879451	0	1.04637	0	Pcyox1l	ENSMUSG00000024579	prenylcysteine oxidase 1 like [Source:MGI Symbol;Acc:MGI:3606062]
ENSMUST00000025474	1.83807	-0.381067	1.42387	-0.267628	0.788986	NA	2.93341	0	1.7589	1.94815	2.09273	2.29524	Napg	ENSMUSG00000024581	N-ethylmaleimide sensitive fusion protein attachment protein gamma [Source:MGI Symbol;Acc:MGI:104561]
ENSMUST00000025477	103.998	0.757249	0.187013	4.04917	5.13989e-05	0.000688529	116.359	164.312	112.57	83.7704	74.2919	72.6826	St8sia3	ENSMUSG00000056812	ST8 alpha-N-acetyl-neuraminide alpha-2,8-sialyltransferase 3 [Source:MGI Symbol;Acc:MGI:106019]
ENSMUST00000025482	3.08509	-1.81267	1.13712	-1.59409	0.110916	NA	0.977805	1.28369	1.7589	4.87037	7.32456	2.29524	Atp8b1	ENSMUSG00000039529	ATPase, class I, type 8B, member 1 [Source:MGI Symbol;Acc:MGI:1859665]
ENSMUST00000025486	11.9255	-0.456139	0.518811	-0.879201	0.379292	0.644668	10.7559	12.8369	7.03561	17.5333	7.32456	16.0667	Lmnb1	ENSMUSG00000024590	lamin B1 [Source:MGI Symbol;Acc:MGI:96795]
ENSMUST00000025488	4.15798	-0.792813	0.888625	-0.89218	0.372297	NA	4.88902	2.56738	1.7589	3.8963	4.18546	7.65079	C330018D20Rik	ENSMUSG00000024592	RIKEN cDNA C330018D20 gene [Source:MGI Symbol;Acc:MGI:1924672]
ENSMUST00000025497	51.0579	-0.188339	0.255909	-0.73596	0.461755	0.71147	46.9346	59.0497	38.6959	43.8334	51.2719	66.5619	Fbn2	ENSMUSG00000024598	fibrillin 2 [Source:MGI Symbol;Acc:MGI:95490]
ENSMUST00000025500	3.95906	-0.0232628	0.896999	-0.025934	0.97931	NA	4.88902	2.56738	4.39726	2.92222	2.09273	6.88572	Slc27a6	ENSMUSG00000024600	solute carrier family 27 (fatty acid transporter), member 6 [Source:MGI Symbol;Acc:MGI:3036230]
ENSMUST00000025503	1.75489	3.28577	1.86283	1.76386	0.0777561	NA	6.84463	0	2.63835	0	1.04637	0	Isoc1	ENSMUSG00000024601	isochorismatase domain containing 1 [Source:MGI Symbol;Acc:MGI:1913557]
ENSMUST00000025505	2.08179	0.276431	1.34126	0.206098	0.836714	NA	0.977805	5.13476	0.879451	2.92222	1.04637	1.53016	Dctn4	ENSMUSG00000024603	dynactin 4 [Source:MGI Symbol;Acc:MGI:1914915]
ENSMUST00000025506	1.23514	-2.4741	2.07545	-1.19208	0.23323	NA	0	1.28369	0	0.974075	2.09273	3.06032	Rbm22	ENSMUSG00000024604	RNA binding motif protein 22 [Source:MGI Symbol;Acc:MGI:1914060]
ENSMUST00000025520	9.2972	-0.60372	0.601604	-1.00352	0.315611	0.586207	13.6893	3.85107	4.39726	8.76667	13.6027	11.4762	Slc6a7	ENSMUSG00000052026	solute carrier family 6 (neurotransmitter transporter, L-proline), member 7 [Source:MGI Symbol;Acc:MGI:2147363]
ENSMUST00000025541	2.82808	-0.337485	1.07645	-0.313515	0.753889	NA	1.95561	3.85107	1.7589	2.92222	4.18546	2.29524	Gnaq	ENSMUSG00000024639	guanine nucleotide binding protein, alpha q polypeptide [Source:MGI Symbol;Acc:MGI:95776]
ENSMUST00000025542	0.324692	-1.763	4.03225	-0.437225	0.661948	NA	0	0	0	1.94815	0	0	Psat1	ENSMUSG00000024640	phosphoserine aminotransferase 1 [Source:MGI Symbol;Acc:MGI:2183441]
ENSMUST00000025567	8.56222	-0.688863	0.602645	-1.14306	0.253012	NA	6.84463	3.85107	8.79451	9.74075	8.37092	13.7714	Fads2	ENSMUSG00000024665	fatty acid desaturase 2 [Source:MGI Symbol;Acc:MGI:1930079]
ENSMUST00000025568	5.69651	-0.131211	0.868659	-0.15105	0.879936	NA	5.86683	1.28369	8.79451	14.6111	2.09273	1.53016	Tmem138	ENSMUSG00000024666	transmembrane protein 138 [Source:MGI Symbol;Acc:MGI:1920232]
ENSMUST00000025569	0.341462	0.167149	4.08047	0.0409631	0.967325	NA	0	1.28369	0	0	0	0.765079	Tmem216	ENSMUSG00000024667	transmembrane protein 216 [Source:MGI Symbol;Acc:MGI:1920020]
ENSMUST00000025570	1.3862	-0.536957	2.03239	-0.2642	0.791626	NA	0	2.56738	0.879451	4.87037	0	0	Sdhaf2	ENSMUSG00000024668	succinate dehydrogenase complex assembly factor 2 [Source:MGI Symbol;Acc:MGI:1913322]
ENSMUST00000025581	0.998955	-0.0884883	2.62732	-0.03368	0.973132	NA	2.93341	0	0	0	0	3.06032	Ms4a4d	ENSMUSG00000024678	membrane-spanning 4-domains, subfamily A, member 4D [Source:MGI Symbol;Acc:MGI:1913857]
ENSMUST00000025585	8.93141	0.673884	0.606239	1.11158	0.266318	0.536711	10.7559	10.2695	12.3123	4.87037	3.1391	12.2413	Cblif	ENSMUSG00000024682	cobalamin binding intrinsic factor [Source:MGI Symbol;Acc:MGI:1202394]
ENSMUST00000025590	196.535	0.299343	0.145332	2.05972	0.0394251	0.165548	231.74	237.483	182.926	147.085	192.531	187.444	Osbp	ENSMUSG00000024687	oxysterol binding protein [Source:MGI Symbol;Acc:MGI:97447]
ENSMUST00000025601	1.45348	0.394651	1.83424	0.215158	0.829644	NA	4.88902	0	0	0.974075	2.09273	0.765079	Lpxn	ENSMUSG00000024696	leupaxin [Source:MGI Symbol;Acc:MGI:2147677]
ENSMUST00000025602	4.74092	0.0831431	0.796434	0.104394	0.916857	NA	3.91122	6.41845	4.39726	3.8963	5.23183	4.59048	Gna14	ENSMUSG00000024697	guanine nucleotide binding protein, alpha 14 [Source:MGI Symbol;Acc:MGI:95769]
ENSMUST00000025617	219.711	0.484729	0.246046	1.97007	0.04883	0.189967	252.274	249.036	268.233	130.526	181.021	237.175	Rfk	ENSMUSG00000024712	riboflavin kinase [Source:MGI Symbol;Acc:MGI:1914688]
ENSMUST00000025618	0.619085	2.88712	3.42461	0.843051	0.3992	NA	1.95561	0	1.7589	0	0	0	Pcsk5	ENSMUSG00000024713	proprotein convertase subtilisin/kexin type 5 [Source:MGI Symbol;Acc:MGI:97515]
ENSMUST00000025631	0.255026	-1.46206	4.06074	-0.360047	0.718812	NA	0	0	0	0	0	1.53016	Ostf1	ENSMUSG00000024725	osteoclast stimulating factor 1 [Source:MGI Symbol;Acc:MGI:700012]
ENSMUST00000025632	1.74866	0.759379	1.54312	0.492107	0.622644	NA	0.977805	3.85107	1.7589	0	3.1391	0.765079	Carnmt1	ENSMUSG00000024726	carnosine N-methyltransferase 1 [Source:MGI Symbol;Acc:MGI:1914633]
ENSMUST00000025635	411.903	0.974128	0.100892	9.65518	4.6735e-22	3.24184e-20	524.103	551.987	562.849	259.104	277.287	296.086	1700017D01Rik	ENSMUSG00000024729	RIKEN cDNA 1700017D01 gene [Source:MGI Symbol;Acc:MGI:1916619]
ENSMUST00000025647	2.00691	2.51597	1.53751	1.6364	0.101757	NA	2.93341	3.85107	3.51781	0.974075	0	0.765079	Pga5	ENSMUSG00000024738	pepsinogen 5, group I [Source:MGI Symbol;Acc:MGI:1915935]
ENSMUST00000025649	82.2483	-0.336161	0.2079	-1.61694	0.105892	0.31237	62.5795	66.7519	88.8246	90.589	75.3383	109.406	Ddb1	ENSMUSG00000024740	damage specific DNA binding protein 1 [Source:MGI Symbol;Acc:MGI:1202384]
ENSMUST00000025656	3.87195	-1.17801	1.02766	-1.1463	0.251673	NA	1.95561	2.56738	2.63835	10.7148	0	5.35556	Aldh1a7	ENSMUSG00000024747	aldehyde dehydrogenase family 1, subfamily A7 [Source:MGI Symbol;Acc:MGI:1347050]
ENSMUST00000025659	1.02792	2.43339	2.29182	1.06177	0.28834	NA	1.95561	2.56738	0.879451	0	0	0.765079	Zfand5	ENSMUSG00000024750	zinc finger, AN1-type domain 5 [Source:MGI Symbol;Acc:MGI:1278334]
ENSMUST00000025666	1.49117	-0.835086	1.7221	-0.484922	0.627732	NA	1.95561	1.28369	0	3.8963	1.04637	0.765079	Slc22a19	ENSMUSG00000024757	solute carrier family 22 (organic anion transporter), member 19 [Source:MGI Symbol;Acc:MGI:2442751]
ENSMUST00000025675	2.41887	2.68201	1.48444	1.80675	0.0708015	NA	3.91122	7.70214	0.879451	0.974075	1.04637	0	Naa40	ENSMUSG00000024764	N(alpha)-acetyltransferase 40, NatD catalytic subunit [Source:MGI Symbol;Acc:MGI:1918249]
ENSMUST00000025679	0.515856	-0.706037	3.55493	-0.198608	0.842569	NA	0	1.28369	0	0	1.04637	0.765079	Otub1	ENSMUSG00000024767	OTU domain, ubiquitin aldehyde binding 1 [Source:MGI Symbol;Acc:MGI:2147616]
ENSMUST00000025680	3.55996	-0.184869	0.9662	-0.191336	0.848262	NA	1.95561	2.56738	5.27671	5.84445	4.18546	1.53016	Lipf	ENSMUSG00000024768	lipase, gastric [Source:MGI Symbol;Acc:MGI:1914967]
ENSMUST00000025681	16.0506	-0.476097	0.460508	-1.03385	0.301205	0.574841	8.80024	21.8227	10.5534	21.4296	11.51	22.1873	Cdc42bpg	ENSMUSG00000024769	CDC42 binding protein kinase gamma (DMPK-like) [Source:MGI Symbol;Acc:MGI:2652845]
ENSMUST00000025684	250.437	-0.206622	0.125506	-1.64631	0.0996994	0.300945	246.407	229.78	222.501	233.778	271.009	299.146	Ehd1	ENSMUSG00000024772	EH-domain containing 1 [Source:MGI Symbol;Acc:MGI:1341878]
ENSMUST00000025685	0.376916	2.13682	4.02927	0.530323	0.595888	NA	0.977805	1.28369	0	0	0	0	Lipm	ENSMUSG00000056078	lipase, family member M [Source:MGI Symbol;Acc:MGI:1926003]
ENSMUST00000025686	0.53864	-0.799848	3.77998	-0.211601	0.832418	NA	0	1.28369	0	1.94815	0	0	Ankrd22	ENSMUSG00000024774	ankyrin repeat domain 22 [Source:MGI Symbol;Acc:MGI:1277101]
ENSMUST00000025694	1.37074	-1.50103	1.94998	-0.769764	0.44144	NA	0	1.28369	0.879451	2.92222	3.1391	0	Lipo3	ENSMUSG00000024766	lipase, member O3 [Source:MGI Symbol;Acc:MGI:2147592]
ENSMUST00000025695	1.19651	0.354268	2.0373	0.173891	0.861951	NA	1.95561	1.28369	0.879451	0	0	3.06032	Ppp2r5b	ENSMUSG00000024777	protein phosphatase 2, regulatory subunit B', beta [Source:MGI Symbol;Acc:MGI:2388480]
ENSMUST00000025696	116.021	-0.0645004	0.166327	-0.387792	0.69817	0.863008	102.67	124.518	113.449	108.122	131.842	115.527	Ak3	ENSMUSG00000024782	adenylate kinase 3 [Source:MGI Symbol;Acc:MGI:1860835]
ENSMUST00000025702	1.2152	0.145973	1.99194	0.073282	0.941582	NA	2.93341	0	0.879451	1.94815	0	1.53016	Snx15	ENSMUSG00000024787	sorting nexin 15 [Source:MGI Symbol;Acc:MGI:1916274]
ENSMUST00000025704	1.6539	-0.362216	1.50914	-0.240015	0.810318	NA	0.977805	2.56738	0.879451	2.92222	1.04637	1.53016	Cdca5	ENSMUSG00000024791	cell division cycle associated 5 [Source:MGI Symbol;Acc:MGI:1915099]
ENSMUST00000025711	0.924471	0.24712	2.38146	0.103768	0.917353	NA	0	1.28369	1.7589	0.974075	0	1.53016	Vps51	ENSMUSG00000024797	VPS51 GARP complex subunit [Source:MGI Symbol;Acc:MGI:1915755]
ENSMUST00000025714	0.417372	-2.14718	4.0033	-0.536353	0.591715	NA	0	0	0	0.974075	0	1.53016	Rpp30	ENSMUSG00000024800	ribonuclease P/MRP 30 subunit [Source:MGI Symbol;Acc:MGI:1859683]
ENSMUST00000025727	48.0725	-0.408071	0.25693	-1.58825	0.112229	0.324504	39.1122	38.5107	45.7315	68.1852	50.2255	46.6698	Trpd52l3	ENSMUSG00000024815	tumor protein D52-like 3 [Source:MGI Symbol;Acc:MGI:1913995]
ENSMUST00000025728	67.3026	-0.263711	0.209515	-1.25867	0.208148	0.468	64.5351	62.9008	56.2849	75.9778	72.1992	71.9175	Frmd8	ENSMUSG00000024816	FERM domain containing 8 [Source:MGI Symbol;Acc:MGI:1914707]
ENSMUST00000025729	5.18043	0.458974	0.771689	0.594766	0.552	NA	6.84463	5.13476	6.15616	2.92222	3.1391	6.88572	Tnks2	ENSMUSG00000024811	tankyrase, TRF1-interacting ankyrin-related ADP-ribose polymerase 2 [Source:MGI Symbol;Acc:MGI:1921743]
ENSMUST00000025739	0.67348	-2.81207	3.28279	-0.856608	0.391661	NA	0	0	0	1.94815	2.09273	0	Uhrf2	ENSMUSG00000024817	ubiquitin-like, containing PHD and RING finger domains 2 [Source:MGI Symbol;Acc:MGI:1923718]
ENSMUST00000025745	1.03621	0.714475	2.37979	0.300226	0.764005	NA	0	1.28369	2.63835	0	0	2.29524	Mrpl21	ENSMUSG00000024829	mitochondrial ribosomal protein L21 [Source:MGI Symbol;Acc:MGI:2660674]
ENSMUST00000025749	7.29188	-0.32449	0.64677	-0.501709	0.615872	NA	7.82244	6.41845	5.27671	4.87037	9.41729	9.94603	Rps6kb2	ENSMUSG00000024830	ribosomal protein S6 kinase, polypeptide 2 [Source:MGI Symbol;Acc:MGI:1927343]
ENSMUST00000025751	0.754112	-2.98954	2.82498	-1.05825	0.289942	NA	0	0	0	1.94815	1.04637	1.53016	Ighmbp2	ENSMUSG00000024831	immunoglobulin mu binding protein 2 [Source:MGI Symbol;Acc:MGI:99954]
ENSMUST00000025752	3.14697	-1.03181	1.03001	-1.00174	0.316468	NA	1.95561	2.56738	1.7589	4.87037	3.1391	4.59048	Pola2	ENSMUSG00000024833	polymerase (DNA directed), alpha 2 [Source:MGI Symbol;Acc:MGI:99690]
ENSMUST00000025755	1.04369	1.32073	2.26499	0.583106	0.559822	NA	1.95561	2.56738	0	0.974075	0	0.765079	Dmrt1	ENSMUSG00000024837	doublesex and mab-3 related transcription factor 1 [Source:MGI Symbol;Acc:MGI:1354733]
ENSMUST00000025759	12	-0.422237	0.506076	-0.834335	0.404092	0.663949	12.7115	8.98583	8.79451	15.5852	16.7418	9.18095	Eif1ad	ENSMUSG00000024841	eukaryotic translation initiation factor 1A domain containing [Source:MGI Symbol;Acc:MGI:1917110]
ENSMUST00000025762	44.4141	-0.158762	0.264934	-0.59925	0.549006	0.772121	33.2454	41.0781	51.0082	46.7556	52.3183	42.0794	Banf1	ENSMUSG00000024844	barrier to autointegration factor 1 [Source:MGI Symbol;Acc:MGI:1346330]
ENSMUST00000025764	18.8633	-0.843923	0.423699	-1.9918	0.0463933	0.183737	10.7559	16.688	13.1918	35.0667	19.8809	17.5968	Cst6	ENSMUSG00000024846	cystatin E/M [Source:MGI Symbol;Acc:MGI:1920970]
ENSMUST00000025774	3.03935	-1.11634	1.13025	-0.987695	0.323302	NA	2.93341	0	2.63835	7.7926	1.04637	3.8254	Sf3b2	ENSMUSG00000024853	splicing factor 3b, subunit 2 [Source:MGI Symbol;Acc:MGI:2441856]
ENSMUST00000025778	3.37321	-0.951751	1.04366	-0.911939	0.361801	NA	0.977805	1.28369	4.39726	6.81852	5.23183	1.53016	Gldc	ENSMUSG00000024827	glycine decarboxylase [Source:MGI Symbol;Acc:MGI:1341155]
ENSMUST00000025786	52.7344	-0.198759	0.257353	-0.77232	0.439925	0.695737	43.0234	39.7944	64.2	47.7297	51.2719	70.3873	Pacs1	ENSMUSG00000024855	phosphofurin acidic cluster sorting protein 1 [Source:MGI Symbol;Acc:MGI:1277113]
ENSMUST00000025803	3.25239	-1.4609	1.14664	-1.27407	0.20264	NA	0.977805	2.56738	1.7589	0	7.32456	6.88572	Dkk1	ENSMUSG00000024868	dickkopf WNT signaling pathway inhibitor 1 [Source:MGI Symbol;Acc:MGI:1329040]
ENSMUST00000025804	41.84	-0.258785	0.278353	-0.9297	0.352526	0.621333	48.8902	30.8086	34.2986	36.0408	51.2719	49.7302	Rab1b	ENSMUSG00000024870	RAB1B, member RAS oncogene family [Source:MGI Symbol;Acc:MGI:1923558]
ENSMUST00000025805	1.8032	2.32071	1.67788	1.38312	0.166628	NA	6.84463	1.28369	0.879451	0	1.04637	0.765079	Cnih2	ENSMUSG00000024873	cornichon family AMPA receptor auxiliary protein 2 [Source:MGI Symbol;Acc:MGI:1277225]
ENSMUST00000025811	0.483315	-0.843486	3.66446	-0.23018	0.817952	NA	0	0	0.879451	0.974075	1.04637	0	Yif1a	ENSMUSG00000024875	Yip1 interacting factor homolog A (S. cerevisiae) [Source:MGI Symbol;Acc:MGI:1915340]
ENSMUST00000025815	5.85585	0.311982	1.28405	0.242967	0.808031	NA	0	8.98583	10.5534	1.94815	5.23183	8.41587	Cbwd1	ENSMUSG00000024878	COBW domain containing 1 [Source:MGI Symbol;Acc:MGI:2385089]
ENSMUST00000025827	8.32358	-0.563261	0.649565	-0.867136	0.385867	NA	2.93341	11.5532	6.15616	13.637	4.18546	11.4762	Minpp1	ENSMUSG00000024896	multiple inositol polyphosphate histidine phosphatase 1 [Source:MGI Symbol;Acc:MGI:1336159]
ENSMUST00000025830	57.4675	-0.239385	0.236584	-1.01184	0.311616	0.583496	55.7349	53.915	48.3698	49.6778	77.431	59.6762	Apba1	ENSMUSG00000024897	amyloid beta (A4) precursor protein binding, family A, member 1 [Source:MGI Symbol;Acc:MGI:1860297]
ENSMUST00000025831	6.75342	0.985842	0.678078	1.45388	0.14598	NA	9.77805	10.2695	7.03561	3.8963	4.18546	5.35556	Dock8	ENSMUSG00000052085	dedicator of cytokinesis 8 [Source:MGI Symbol;Acc:MGI:1921396]
ENSMUST00000025834	0.523183	-2.44534	3.98548	-0.613563	0.539504	NA	0	0	0	0	3.1391	0	Peli3	ENSMUSG00000024901	pellino 3 [Source:MGI Symbol;Acc:MGI:1924963]
ENSMUST00000025835	24.8085	-0.590335	0.347565	-1.69849	0.0894154	0.282309	23.4673	15.4043	20.2274	27.2741	30.3446	32.1333	Cpt1a	ENSMUSG00000024900	carnitine palmitoyltransferase 1a, liver [Source:MGI Symbol;Acc:MGI:1098296]
ENSMUST00000025850	3.00341	-0.86762	1.12855	-0.768789	0.442019	NA	2.93341	2.56738	0.879451	0.974075	8.37092	2.29524	Fosl1	ENSMUSG00000024912	fos-like antigen 1 [Source:MGI Symbol;Acc:MGI:107179]
ENSMUST00000025851	0.348788	-1.85356	4.02474	-0.460542	0.645127	NA	0	0	0	0	2.09273	0	Dpp3	ENSMUSG00000063904	dipeptidylpeptidase 3 [Source:MGI Symbol;Acc:MGI:1922471]
ENSMUST00000025861	961.556	0.802715	0.0840156	9.55435	1.24366e-21	8.29816e-20	1152.83	1156.6	1355.23	682.826	724.085	697.752	Ovol1	ENSMUSG00000024922	ovo like zinc finger 1 [Source:MGI Symbol;Acc:MGI:1330290]
ENSMUST00000025864	231.917	0.0417067	0.12262	0.34013	0.733759	0.882485	223.917	231.064	250.644	240.596	213.458	231.819	Rnaseh2c	ENSMUSG00000024925	ribonuclease H2, subunit C [Source:MGI Symbol;Acc:MGI:1915459]
ENSMUST00000025867	4.72338	-0.608163	0.808262	-0.752432	0.451791	NA	3.91122	3.85107	3.51781	3.8963	6.27819	6.88572	Rela	ENSMUSG00000024927	v-rel reticuloendotheliosis viral oncogene homolog A (avian) [Source:MGI Symbol;Acc:MGI:103290]
ENSMUST00000025872	325.317	1.51517	0.132641	11.4231	3.20615e-30	3.30328e-28	438.057	472.398	537.345	134.422	168.465	201.216	4430402I18Rik	ENSMUSG00000064202	RIKEN cDNA 4430402I18 gene [Source:MGI Symbol;Acc:MGI:1918036]
ENSMUST00000025875	10.4892	-0.226122	0.559367	-0.404247	0.686031	0.85635	9.77805	15.4043	4.39726	7.7926	12.5564	13.0064	Slc1a1	ENSMUSG00000024935	solute carrier family 1 (neuronal/epithelial high affinity glutamate transporter, system Xag), member 1 [Source:MGI Symbol;Acc:MGI:105083]
ENSMUST00000025893	167.939	0.769203	0.143677	5.3537	8.61718e-08	1.8576e-06	196.539	204.107	233.055	123.707	133.935	116.292	Arl2	ENSMUSG00000024944	ADP-ribosylation factor-like 2 [Source:MGI Symbol;Acc:MGI:1928393]
ENSMUST00000025904	2.61891	1.14418	2.10316	0.544026	0.586423	NA	0.977805	8.98583	0.879451	4.87037	0	0	Prdx5	ENSMUSG00000024953	peroxiredoxin 5 [Source:MGI Symbol;Acc:MGI:1859821]
ENSMUST00000025906	6.67486	-0.663242	0.692649	-0.957543	0.338293	NA	5.86683	5.13476	4.39726	11.6889	8.37092	4.59048	Esrra	ENSMUSG00000024955	estrogen related receptor, alpha [Source:MGI Symbol;Acc:MGI:1346831]
ENSMUST00000025910	5.65939	-0.841804	0.816463	-1.03104	0.302523	NA	0	5.13476	7.03561	10.7148	4.18546	6.88572	Bad	ENSMUSG00000024959	BCL2-associated agonist of cell death [Source:MGI Symbol;Acc:MGI:1096330]
ENSMUST00000025918	60.4308	-0.291528	0.228672	-1.27487	0.202354	0.461189	61.6017	52.6313	49.2493	73.0556	53.3646	72.6826	Stip1	ENSMUSG00000024966	stress-induced phosphoprotein 1 [Source:MGI Symbol;Acc:MGI:109130]
ENSMUST00000025921	0.650627	0.0349848	3.4185	0.010234	0.991835	NA	1.95561	0	0	1.94815	0	0	Mark2	ENSMUSG00000024969	MAP/microtubule affinity regulating kinase 2 [Source:MGI Symbol;Acc:MGI:99638]
ENSMUST00000025924	9.51701	0.441964	0.564973	0.782275	0.434053	0.691025	13.6893	11.5532	7.91506	8.76667	5.23183	9.94603	Spindoc	ENSMUSG00000024970	spindlin interactor and repressor of chromatin binding [Source:MGI Symbol;Acc:MGI:2147611]
ENSMUST00000025925	0.990727	-1.14666	2.69158	-0.426017	0.670095	NA	0	0	1.7589	0	4.18546	0	Plaat3	ENSMUSG00000060675	phospholipase A and acyltransferase 3 [Source:MGI Symbol;Acc:MGI:2179715]
ENSMUST00000025929	15.2796	-0.409199	0.438997	-0.932123	0.351273	0.619879	13.6893	11.5532	14.0712	13.637	18.8346	19.8921	Plaat5	ENSMUSG00000024973	phospholipase A and acyltransferase 5 [Source:MGI Symbol;Acc:MGI:1913977]
ENSMUST00000025930	49.5106	0.260775	0.25662	1.01619	0.30954	0.581872	43.0234	69.3192	50.1287	51.626	43.9473	39.0191	Smc3	ENSMUSG00000024974	structural maintenance of chromosomes 3 [Source:MGI Symbol;Acc:MGI:1339795]
ENSMUST00000025931	2.66719	-0.363503	1.11468	-0.326106	0.744344	NA	3.91122	1.28369	1.7589	3.8963	2.09273	3.06032	Pdcd4	ENSMUSG00000024975	programmed cell death 4 [Source:MGI Symbol;Acc:MGI:107490]
ENSMUST00000025940	22.171	-0.280399	0.377259	-0.743254	0.457328	0.708212	22.4895	16.688	20.2274	24.3519	32.4373	16.8317	C1qtnf9	ENSMUSG00000071347	C1q and tumor necrosis factor related protein 9 [Source:MGI Symbol;Acc:MGI:3045252]
ENSMUST00000025946	0.290481	0.167149	4.08047	0.0409631	0.967325	NA	0.977805	0	0	0	0	0.765079	Cyp26a1	ENSMUSG00000024987	cytochrome P450, family 26, subfamily a, polypeptide 1 [Source:MGI Symbol;Acc:MGI:1096359]
ENSMUST00000025955	52.3264	0.198785	0.241486	0.823174	0.410409	0.667748	51.8237	47.4965	67.7178	47.7297	50.2255	48.9651	Eif3a	ENSMUSG00000024991	eukaryotic translation initiation factor 3, subunit A [Source:MGI Symbol;Acc:MGI:95301]
ENSMUST00000025961	5.99978	0.202272	0.770021	0.262684	0.792794	NA	10.7559	1.28369	7.03561	1.94815	7.32456	7.65079	Prdx3	ENSMUSG00000024997	peroxiredoxin 3 [Source:MGI Symbol;Acc:MGI:88034]
ENSMUST00000025963	7.16738	-0.386136	0.706279	-0.546719	0.584572	NA	0.977805	5.13476	12.3123	7.7926	8.37092	8.41587	Noc3l	ENSMUSG00000024999	NOC3 like DNA replication regulator [Source:MGI Symbol;Acc:MGI:1932610]
ENSMUST00000025965	5.33857	-0.697148	0.811756	-0.858814	0.390443	NA	6.84463	2.56738	2.63835	11.6889	5.23183	3.06032	Hells	ENSMUSG00000025001	helicase, lymphoid specific [Source:MGI Symbol;Acc:MGI:106209]
ENSMUST00000025966	0.992088	0.231561	2.29505	0.100896	0.919633	NA	1.95561	1.28369	0	1.94815	0	0.765079	Cyp2c55	ENSMUSG00000025002	cytochrome P450, family 2, subfamily c, polypeptide 55 [Source:MGI Symbol;Acc:MGI:1919332]
ENSMUST00000025981	10.7146	-0.759662	0.584232	-1.30028	0.193506	0.449803	12.7115	8.98583	2.63835	11.6889	8.37092	19.8921	Tctn3	ENSMUSG00000025008	tectonic family member 3 [Source:MGI Symbol;Acc:MGI:1914840]
ENSMUST00000025983	0.429421	-2.18309	4.00096	-0.545642	0.585312	NA	0	0	0	0	1.04637	1.53016	Ccnj	ENSMUSG00000025010	cyclin J [Source:MGI Symbol;Acc:MGI:2443297]
ENSMUST00000025989	7.88572	-0.506841	0.625848	-0.809847	0.418028	NA	7.82244	2.56738	8.79451	8.76667	9.41729	9.94603	Tm9sf3	ENSMUSG00000025016	transmembrane 9 superfamily member 3 [Source:MGI Symbol;Acc:MGI:1914262]
ENSMUST00000025992	0.814837	3.27541	3.23577	1.01225	0.311419	NA	4.88902	0	0	0	0	0	Kctd1	ENSMUSG00000036225	potassium channel tetramerisation domain containing 1 [Source:MGI Symbol;Acc:MGI:1918269]
ENSMUST00000025998	8.62815	-0.620331	0.592519	-1.04694	0.295129	NA	6.84463	6.41845	7.03561	13.637	9.41729	8.41587	Mxi1	ENSMUSG00000025025	MAX interactor 1, dimerization protein [Source:MGI Symbol;Acc:MGI:97245]
ENSMUST00000026008	3.18168	0.761032	1.01153	0.752355	0.451837	NA	2.93341	3.85107	5.27671	2.92222	1.04637	3.06032	Trim8	ENSMUSG00000025034	tripartite motif-containing 8 [Source:MGI Symbol;Acc:MGI:1933302]
ENSMUST00000026013	6.63898	-0.229577	0.7125	-0.322213	0.747291	NA	2.93341	11.5532	4.39726	6.81852	4.18546	9.94603	Maoa	ENSMUSG00000025037	monoamine oxidase A [Source:MGI Symbol;Acc:MGI:96915]
ENSMUST00000026014	19.1809	0.462763	0.419874	1.10215	0.270398	0.540262	14.6671	35.9433	16.7096	17.5333	15.6955	14.5365	Efhc2	ENSMUSG00000025038	EF-hand domain (C-terminal) containing 2 [Source:MGI Symbol;Acc:MGI:1921655]
ENSMUST00000026018	18.375	0.77933	0.408302	1.90871	0.0562999	0.209473	17.6005	23.1064	29.0219	12.663	12.5564	15.3016	Dusp21	ENSMUSG00000025043	dual specificity phosphatase 21 [Source:MGI Symbol;Acc:MGI:1920797]
ENSMUST00000026021	0.915933	2.22284	2.63145	0.844721	0.398266	NA	0	3.85107	0.879451	0	0	0.765079	Msr1	ENSMUSG00000025044	macrophage scavenger receptor 1 [Source:MGI Symbol;Acc:MGI:98257]
ENSMUST00000026027	30.067	0.0123499	0.330073	0.0374157	0.970154	0.987426	35.201	23.1064	31.6603	41.8852	24.0664	24.4825	Taf5	ENSMUSG00000025049	TATA-box binding protein associated factor 5 [Source:MGI Symbol;Acc:MGI:2442144]
ENSMUST00000026029	1.12523	-2.40003	2.3123	-1.03794	0.299297	NA	0.977805	0	0	1.94815	0	3.8254	Samt4	ENSMUSG00000025051	spermatogenesis associated multipass transmembrane protein 4 [Source:MGI Symbol;Acc:MGI:1922435]
ENSMUST00000026036	14.6676	1.14641	0.877779	1.30604	0.19154	0.446862	29.3341	20.539	10.5534	15.5852	10.4637	1.53016	Nr0b1	ENSMUSG00000025056	nuclear receptor subfamily 0, group B, member 1 [Source:MGI Symbol;Acc:MGI:1352460]
ENSMUST00000026043	2.11625	-0.283692	1.49155	-0.190199	0.849153	NA	1.95561	3.85107	0	5.84445	1.04637	0	Slk	ENSMUSG00000025060	STE20-like kinase [Source:MGI Symbol;Acc:MGI:103241]
ENSMUST00000026068	4.25372	-1.71872	0.956104	-1.79763	0.0722358	NA	3.91122	0	1.7589	5.84445	9.41729	4.59048	Vwa2	ENSMUSG00000025082	von Willebrand factor A domain containing 2 [Source:MGI Symbol;Acc:MGI:2684334]
ENSMUST00000026073	0.341462	0.167149	4.08047	0.0409631	0.967325	NA	0	1.28369	0	0	0	0.765079	Trub1	ENSMUSG00000025086	TruB pseudouridine (psi) synthase family member 1 [Source:MGI Symbol;Acc:MGI:1919383]
ENSMUST00000026081	2.39577	-0.0907958	1.18254	-0.0767805	0.938798	NA	2.93341	1.28369	2.63835	3.8963	2.09273	1.53016	Pnliprp2	ENSMUSG00000025091	pancreatic lipase-related protein 2 [Source:MGI Symbol;Acc:MGI:1336202]
ENSMUST00000026084	9.13141	-0.282655	0.649738	-0.435029	0.663541	0.842613	10.7559	12.8369	1.7589	10.7148	4.18546	14.5365	Slc18a2	ENSMUSG00000025094	solute carrier family 18 (vesicular monoamine), member 2 [Source:MGI Symbol;Acc:MGI:106677]
ENSMUST00000026092	0.522869	1.11235	3.5324	0.3149	0.752838	NA	0	1.28369	0.879451	0.974075	0	0	3110040N11Rik	ENSMUSG00000025102	RIKEN cDNA 3110040N11 gene [Source:MGI Symbol;Acc:MGI:1914540]
ENSMUST00000026093	69.8089	0.716476	0.210431	3.40481	0.000662107	0.00647866	88.0024	75.7377	95.8602	49.6778	57.5501	52.0254	Btbd1	ENSMUSG00000025103	BTB (POZ) domain containing 1 [Source:MGI Symbol;Acc:MGI:1933765]
ENSMUST00000026094	0.910993	0.907882	2.80492	0.323674	0.746185	NA	0	0	3.51781	1.94815	0	0	Hdgfl3	ENSMUSG00000025104	HDGF like 3 [Source:MGI Symbol;Acc:MGI:1352760]
ENSMUST00000026096	7.66302	0.603513	0.660569	0.913625	0.360914	NA	11.7337	10.2695	6.15616	2.92222	4.18546	10.7111	Bnc1	ENSMUSG00000025105	basonuclin 1 [Source:MGI Symbol;Acc:MGI:1097164]
ENSMUST00000026120	0.510053	-2.44472	3.98551	-0.613402	0.539611	NA	0	0	0	0	0	3.06032	Bhlhe22	ENSMUSG00000025128	basic helix-loop-helix family, member e22 [Source:MGI Symbol;Acc:MGI:1930001]
ENSMUST00000026121	16.4031	0.086323	0.447706	0.192812	0.847107	0.932237	11.7337	17.9717	21.1068	22.4037	8.37092	16.8317	Ppp1r27	ENSMUSG00000025129	protein phosphatase 1, regulatory subunit 27 [Source:MGI Symbol;Acc:MGI:1915951]
ENSMUST00000026122	22.939	-0.809392	0.381546	-2.12135	0.0338926	0.1485	24.4451	8.98583	15.8301	26.3	34.53	27.5429	P4hb	ENSMUSG00000025130	prolyl 4-hydroxylase, beta polypeptide [Source:MGI Symbol;Acc:MGI:97464]
ENSMUST00000026125	3.40269	0.0343155	1.04006	0.0329937	0.97368	NA	1.95561	5.13476	3.51781	2.92222	0	6.88572	Alyref	ENSMUSG00000025134	Aly/REF export factor [Source:MGI Symbol;Acc:MGI:1341044]
ENSMUST00000026126	6.41166	-0.156608	0.723485	-0.216464	0.828626	NA	2.93341	10.2695	5.27671	2.92222	9.41729	7.65079	Ints4	ENSMUSG00000025133	integrator complex subunit 4 [Source:MGI Symbol;Acc:MGI:1917164]
ENSMUST00000026128	5.97783	-0.487339	0.761831	-0.639695	0.522371	NA	2.93341	7.70214	4.39726	2.92222	12.5564	5.35556	Anapc11	ENSMUSG00000025135	anaphase promoting complex subunit 11 [Source:MGI Symbol;Acc:MGI:1913406]
ENSMUST00000026129	2.22312	-1.13301	1.32045	-0.858045	0.390868	NA	2.93341	1.28369	0	2.92222	3.1391	3.06032	Pcyt2	ENSMUSG00000025137	phosphate cytidylyltransferase 2, ethanolamine [Source:MGI Symbol;Acc:MGI:1915921]
ENSMUST00000026142	0.523183	-2.44534	3.98548	-0.613563	0.539504	NA	0	0	0	0	3.1391	0	Maged1	ENSMUSG00000025151	melanoma antigen, family D, 1 [Source:MGI Symbol;Acc:MGI:1930187]
ENSMUST00000026150	45.7412	-0.329533	0.282615	-1.16601	0.243609	0.509553	36.1788	46.2128	40.4548	47.7297	33.4837	70.3873	Arhgap19	ENSMUSG00000025154	Rho GTPase activating protein 19 [Source:MGI Symbol;Acc:MGI:1918335]
ENSMUST00000026159	8.60457	0.36062	0.603377	0.597669	0.550061	NA	5.86683	8.98583	14.0712	4.87037	9.41729	8.41587	Cd7	ENSMUSG00000025163	CD7 antigen [Source:MGI Symbol;Acc:MGI:88344]
ENSMUST00000026169	1.49529	-0.562212	1.90794	-0.294669	0.768247	NA	0.977805	0	2.63835	0	0	5.35556	Ogfod3	ENSMUSG00000025169	2-oxoglutarate and iron-dependent oxygenase domain containing 3 [Source:MGI Symbol;Acc:MGI:1913429]
ENSMUST00000026170	237.355	0.834913	0.135527	6.16048	7.25256e-10	1.9771e-08	299.208	332.476	284.063	150.008	154.862	203.511	Ubtd1	ENSMUSG00000025171	ubiquitin domain containing 1 [Source:MGI Symbol;Acc:MGI:2385092]
ENSMUST00000026173	5.35566	0.0119876	0.792787	0.0151209	0.987936	NA	4.88902	1.28369	9.67397	7.7926	3.1391	5.35556	Wdr45b	ENSMUSG00000025173	WD repeat domain 45B [Source:MGI Symbol;Acc:MGI:1914090]
ENSMUST00000026188	4.89157	-1.27601	0.858222	-1.48681	0.137066	NA	2.93341	5.13476	0.879451	3.8963	7.32456	9.18095	R3hcc1l	ENSMUSG00000025184	R3H domain and coiled-coil containing 1 like [Source:MGI Symbol;Acc:MGI:1196316]
ENSMUST00000026190	3.61731	-0.37287	1.02484	-0.363832	0.715983	NA	2.93341	0	6.15616	1.94815	8.37092	2.29524	Loxl4	ENSMUSG00000025185	lysyl oxidase-like 4 [Source:MGI Symbol;Acc:MGI:1914823]
ENSMUST00000026208	3.14471	-0.860561	1.06243	-0.809994	0.417944	NA	3.91122	0	2.63835	4.87037	2.09273	5.35556	Abcc2	ENSMUSG00000025194	ATP-binding cassette, sub-family C (CFTR/MRP), member 2 [Source:MGI Symbol;Acc:MGI:1352447]
ENSMUST00000026210	2.3091	-0.452774	1.21859	-0.371555	0.710224	NA	0.977805	1.28369	3.51781	2.92222	2.09273	3.06032	Cpn1	ENSMUSG00000025196	carboxypeptidase N, polypeptide 1 [Source:MGI Symbol;Acc:MGI:2135874]
ENSMUST00000026211	0.427897	2.30122	4.01629	0.572971	0.566664	NA	0	2.56738	0	0	0	0	Cyp2c23	ENSMUSG00000025197	cytochrome P450, family 2, subfamily c, polypeptide 23 [Source:MGI Symbol;Acc:MGI:1888897]
ENSMUST00000026220	7.46133	0.161776	0.638197	0.253489	0.79989	NA	8.80024	5.13476	9.67397	7.7926	4.18546	9.18095	Scd3	ENSMUSG00000025202	stearoyl-coenzyme A desaturase 3 [Source:MGI Symbol;Acc:MGI:1353437]
ENSMUST00000026221	19.0865	0.996067	0.409826	2.43046	0.0150796	0.0836271	34.2232	17.9717	23.7452	11.6889	14.6491	12.2413	Scd2	ENSMUSG00000025203	stearoyl-Coenzyme A desaturase 2 [Source:MGI Symbol;Acc:MGI:98240]
ENSMUST00000026227	3.60271	-0.778481	0.95576	-0.814515	0.41535	NA	3.91122	1.28369	2.63835	6.81852	3.1391	3.8254	Twnk	ENSMUSG00000025209	twinkle mtDNA helicase [Source:MGI Symbol;Acc:MGI:2137410]
ENSMUST00000026236	9.72455	-0.262125	0.619608	-0.42305	0.672259	0.848427	2.93341	10.2695	13.1918	18.5074	7.32456	6.12064	Tlx1	ENSMUSG00000025215	T cell leukemia, homeobox 1 [Source:MGI Symbol;Acc:MGI:98769]
ENSMUST00000026239	182.256	-0.239711	0.136937	-1.75052	0.0800295	0.264838	180.894	163.029	158.301	195.789	182.068	213.457	Poll	ENSMUSG00000025218	polymerase (DNA directed), lambda [Source:MGI Symbol;Acc:MGI:1889000]
ENSMUST00000026243	7.82468	0.854429	0.629516	1.35728	0.174693	NA	6.84463	12.8369	10.5534	5.84445	6.27819	4.59048	Oga	ENSMUSG00000025220	O-GlcNAcase [Source:MGI Symbol;Acc:MGI:1932139]
ENSMUST00000026259	0.504429	1.17022	3.5924	0.32575	0.744614	NA	0.977805	1.28369	0	0	0	0.765079	Pitx3	ENSMUSG00000025229	paired-like homeodomain transcription factor 3 [Source:MGI Symbol;Acc:MGI:1100498]
ENSMUST00000026262	100.773	0.118292	0.181292	0.652495	0.514082	0.748034	118.314	110.397	86.1862	101.304	100.451	87.9841	Hexa	ENSMUSG00000025232	hexosaminidase A [Source:MGI Symbol;Acc:MGI:96073]
ENSMUST00000026264	0.456118	2.44807	4.00585	0.611123	0.541118	NA	0.977805	0	1.7589	0	0	0	Arih1	ENSMUSG00000025234	ariadne RBR E3 ubiquitin protein ligase 1 [Source:MGI Symbol;Acc:MGI:1344363]
ENSMUST00000026265	5.35237	0.00957051	0.786659	0.012166	0.990293	NA	1.95561	5.13476	8.79451	5.84445	7.32456	3.06032	Bbs4	ENSMUSG00000025235	Bardet-Biedl syndrome 4 (human) [Source:MGI Symbol;Acc:MGI:2143311]
ENSMUST00000026269	19.1012	-0.591113	0.400322	-1.47659	0.139784	0.371803	20.5339	12.8369	12.3123	25.3259	19.8809	23.7175	Limd1	ENSMUSG00000025239	LIM domains containing 1 [Source:MGI Symbol;Acc:MGI:1352502]
ENSMUST00000026273	96.5085	-0.125038	0.191685	-0.652308	0.514202	0.748034	72.3576	98.8441	105.534	117.863	94.1729	90.2794	Slc6a20b	ENSMUSG00000025243	solute carrier family 6 (neurotransmitter transporter), member 20B [Source:MGI Symbol;Acc:MGI:1336891]
ENSMUST00000026288	24.716	-0.720762	0.375088	-1.92158	0.0546582	0.204961	21.5117	8.98583	24.6246	22.4037	35.5764	35.1937	Ribc1	ENSMUSG00000025257	RIB43A domain with coiled-coils 1 [Source:MGI Symbol;Acc:MGI:1913861]
ENSMUST00000026313	3.45648	0.585952	0.978861	0.598606	0.549435	NA	6.84463	3.85107	1.7589	3.8963	2.09273	2.29524	Abhd6	ENSMUSG00000025277	abhydrolase domain containing 6 [Source:MGI Symbol;Acc:MGI:1913332]
ENSMUST00000026315	23.9294	-0.326228	0.349151	-0.934347	0.350125	0.618969	22.4895	23.1064	18.4685	25.3259	25.1128	29.073	Dnase1l3	ENSMUSG00000025279	deoxyribonuclease 1-like 3 [Source:MGI Symbol;Acc:MGI:1314633]
ENSMUST00000026322	0.483937	0.940785	3.66412	0.256756	0.797367	NA	0.977805	0	0.879451	0	1.04637	0	Polr3a	ENSMUSG00000025280	polymerase (RNA) III (DNA directed) polypeptide A [Source:MGI Symbol;Acc:MGI:2681836]
ENSMUST00000026325	1.0921	-1.19753	2.17536	-0.550496	0.581979	NA	1.95561	0	0	0.974075	2.09273	1.53016	4933436I01Rik	ENSMUSG00000025288	RIKEN cDNA 4933436I01 gene [Source:MGI Symbol;Acc:MGI:1914030]
ENSMUST00000026357	4.39366	-1.4624	0.913291	-1.60124	0.109324	NA	2.93341	1.28369	2.63835	2.92222	10.4637	6.12064	Jph3	ENSMUSG00000025318	junctophilin 3 [Source:MGI Symbol;Acc:MGI:1891497]
ENSMUST00000026360	1.93072	1.7752	1.53852	1.15384	0.248566	NA	6.84463	1.28369	0.879451	0	1.04637	1.53016	Itgb8	ENSMUSG00000025321	integrin beta 8 [Source:MGI Symbol;Acc:MGI:1338035]
ENSMUST00000026367	0.523183	-2.44534	3.98548	-0.613563	0.539504	NA	0	0	0	0	3.1391	0	Sp4	ENSMUSG00000025323	trans-acting transcription factor 4 [Source:MGI Symbol;Acc:MGI:107595]
ENSMUST00000026378	1.41962	0.263509	1.92413	0.13695	0.89107	NA	2.93341	0	1.7589	0	0	3.8254	Padi1	ENSMUSG00000025329	peptidyl arginine deiminase, type I [Source:MGI Symbol;Acc:MGI:1338893]
ENSMUST00000026387	8.2867	-0.412376	0.615878	-0.669575	0.503129	NA	6.84463	10.2695	4.39726	8.76667	12.5564	6.88572	Sbds	ENSMUSG00000025337	SBDS ribosome maturation factor [Source:MGI Symbol;Acc:MGI:1913961]
ENSMUST00000026398	1.54231	0.122567	1.72146	0.0711994	0.943239	NA	0	1.28369	3.51781	2.92222	0	1.53016	Mettl7b	ENSMUSG00000025347	methyltransferase like 7B [Source:MGI Symbol;Acc:MGI:1918914]
ENSMUST00000026408	5.2557	-1.33549	0.833564	-1.60214	0.109124	NA	5.86683	1.28369	1.7589	4.87037	6.27819	11.4762	Gdf11	ENSMUSG00000025352	growth differentiation factor 11 [Source:MGI Symbol;Acc:MGI:1338027]
ENSMUST00000026409	9.89034	0.304695	0.588798	0.517487	0.604816	0.808624	5.86683	20.539	7.03561	6.81852	8.37092	10.7111	Ormdl2	ENSMUSG00000025353	ORM1-like 2 (S. cerevisiae) [Source:MGI Symbol;Acc:MGI:1914094]
ENSMUST00000026410	0.376294	0.167149	4.08047	0.0409631	0.967325	NA	0	1.28369	0	0.974075	0	0	Dnajc14	ENSMUSG00000025354	DnaJ heat shock protein family (Hsp40) member C14 [Source:MGI Symbol;Acc:MGI:1921580]
ENSMUST00000026411	13.3357	-0.245883	0.47392	-0.518827	0.603881	0.807866	11.7337	7.70214	16.7096	13.637	15.6955	14.5365	Mmp19	ENSMUSG00000025355	matrix metallopeptidase 19 [Source:MGI Symbol;Acc:MGI:1927899]
ENSMUST00000026428	10.0283	0.783503	0.558734	1.40228	0.160831	0.403843	11.7337	11.5532	14.9507	3.8963	7.32456	10.7111	Myl6b	ENSMUSG00000039824	myosin, light polypeptide 6B [Source:MGI Symbol;Acc:MGI:1917789]
ENSMUST00000026434	2.443	-0.441959	1.25569	-0.351964	0.724866	NA	2.93341	2.56738	0.879451	2.92222	0	5.35556	Chmp6	ENSMUSG00000025371	charged multivesicular body protein 6 [Source:MGI Symbol;Acc:MGI:3583942]
ENSMUST00000026445	8.75543	-0.405182	0.604968	-0.669757	0.503012	NA	4.88902	12.8369	5.27671	7.7926	12.5564	9.18095	Fscn2	ENSMUSG00000025380	fascin actin-bundling protein 2 [Source:MGI Symbol;Acc:MGI:2443337]
ENSMUST00000026455	1.62	-1.02543	1.70463	-0.601553	0.547472	NA	1.95561	1.28369	0	0	4.18546	2.29524	Mip	ENSMUSG00000025389	major intrinsic protein of lens fiber [Source:MGI Symbol;Acc:MGI:96990]
ENSMUST00000026459	1.40698	0.911154	1.87063	0.487085	0.626198	NA	0.977805	0	4.39726	0.974075	2.09273	0	Atp5b	ENSMUSG00000025393	ATP synthase, H+ transporting mitochondrial F1 complex, beta subunit [Source:MGI Symbol;Acc:MGI:107801]
ENSMUST00000026474	0.301907	-1.66764	4.04066	-0.412715	0.679815	NA	0	0	0	0	1.04637	0.765079	Gli1	ENSMUSG00000025407	GLI-Kruppel family member GLI1 [Source:MGI Symbol;Acc:MGI:95727]
ENSMUST00000026475	5.76332	-0.336115	0.7845	-0.428445	0.668327	NA	5.86683	3.85107	5.27671	2.92222	13.6027	3.06032	Ddit3	ENSMUSG00000025408	DNA-damage inducible transcript 3 [Source:MGI Symbol;Acc:MGI:109247]
ENSMUST00000026479	141.831	0.286032	0.153319	1.8656	0.0620975	0.22414	146.671	169.447	151.266	139.293	131.842	112.467	Dctn2	ENSMUSG00000025410	dynactin 2 [Source:MGI Symbol;Acc:MGI:107733]
ENSMUST00000026495	5.17409	-0.307682	0.770943	-0.399098	0.689821	NA	5.86683	2.56738	5.27671	7.7926	4.18546	5.35556	Atp5a1	ENSMUSG00000025428	ATP synthase, H+ transporting, mitochondrial F1 complex, alpha subunit 1 [Source:MGI Symbol;Acc:MGI:88115]
ENSMUST00000026498	1.78747	0.136046	1.53454	0.0886563	0.929355	NA	2.93341	0	2.63835	0	2.09273	3.06032	Crisp1	ENSMUSG00000025431	cysteine-rich secretory protein 1 [Source:MGI Symbol;Acc:MGI:102553]
ENSMUST00000026499	10.4849	-1.10944	0.609856	-1.81918	0.0688845	0.240341	5.86683	10.2695	4.39726	17.5333	4.18546	20.6571	Crisp3	ENSMUSG00000025433	cysteine-rich secretory protein 3 [Source:MGI Symbol;Acc:MGI:102552]
ENSMUST00000026500	0.61412	1.44644	3.51682	0.411293	0.680858	NA	0	0	2.63835	0	1.04637	0	Avil	ENSMUSG00000025432	advillin [Source:MGI Symbol;Acc:MGI:1333798]
ENSMUST00000026504	0.761126	-1.73024	2.89196	-0.598294	0.549644	NA	0	0	0.879451	2.92222	0	0.765079	Atp23	ENSMUSG00000025436	ATP23 metallopeptidase and ATP synthase assembly factor homolog [Source:MGI Symbol;Acc:MGI:1916984]
ENSMUST00000026506	1.87608	1.6518	1.6599	0.99512	0.319678	NA	0.977805	7.70214	0	0	1.04637	1.53016	Clns1a	ENSMUSG00000025439	chloride channel, nucleotide-sensitive, 1A [Source:MGI Symbol;Acc:MGI:109638]
ENSMUST00000026520	0.511756	-0.890002	3.87834	-0.22948	0.818496	NA	0.977805	0	0	0	2.09273	0	Paip1	ENSMUSG00000025451	polyadenylate binding protein-interacting protein 1 [Source:MGI Symbol;Acc:MGI:2384993]
ENSMUST00000026540	0.663297	1.58048	3.37979	0.467627	0.640052	NA	2.93341	0	0	0	1.04637	0	Prap1	ENSMUSG00000025467	proline-rich acidic protein 1 [Source:MGI Symbol;Acc:MGI:893573]
ENSMUST00000026548	1.10799	3.72696	2.44693	1.52312	0.127729	NA	4.88902	0	1.7589	0	0	0	Adgra1	ENSMUSG00000025475	adhesion G protein-coupled receptor A1 [Source:MGI Symbol;Acc:MGI:1277167]
ENSMUST00000026551	0.439726	2.40092	4.00909	0.598869	0.54926	NA	0	0	2.63835	0	0	0	Dpysl4	ENSMUSG00000025478	dihydropyrimidinase-like 4 [Source:MGI Symbol;Acc:MGI:1349764]
ENSMUST00000026552	0.87616	1.03696	2.67804	0.38721	0.6986	NA	0	0	3.51781	0.974075	0	0.765079	Cyp2e1	ENSMUSG00000025479	cytochrome P450, family 2, subfamily e, polypeptide 1 [Source:MGI Symbol;Acc:MGI:88607]
ENSMUST00000026553	167.225	0.38848	0.138405	2.80684	0.00500298	0.034601	196.539	178.433	193.479	140.267	145.445	149.19	Syce1	ENSMUSG00000025480	synaptonemal complex central element protein 1 [Source:MGI Symbol;Acc:MGI:1921325]
ENSMUST00000026557	14.6833	0.0617482	0.44249	0.139547	0.889018	0.953325	13.6893	15.4043	15.8301	12.663	16.7418	13.7714	Bet1l	ENSMUSG00000025484	Bet1 golgi vesicular membrane trafficking protein like [Source:MGI Symbol;Acc:MGI:1913128]
ENSMUST00000026558	6.07523	0.352149	1.20497	0.292247	0.770098	NA	10.7559	5.13476	4.39726	7.7926	8.37092	0	Ric8a	ENSMUSG00000025485	RIC8 guanine nucleotide exchange factor A [Source:MGI Symbol;Acc:MGI:2141866]
ENSMUST00000026559	1.97403	-0.435585	1.41271	-0.308332	0.757829	NA	2.93341	1.28369	0.879451	2.92222	0	3.8254	Sirt3	ENSMUSG00000025486	sirtuin 3 [Source:MGI Symbol;Acc:MGI:1927665]
ENSMUST00000026560	33.9399	-0.709871	0.317193	-2.23798	0.0252224	0.120291	27.3785	15.4043	33.4192	33.1185	49.1792	45.1397	Psmd13	ENSMUSG00000025487	proteasome (prosome, macropain) 26S subunit, non-ATPase, 13 [Source:MGI Symbol;Acc:MGI:1345192]
ENSMUST00000026561	1.46311	-0.0826998	1.76755	-0.0467879	0.962682	NA	0	2.56738	1.7589	2.92222	0	1.53016	Cox8b	ENSMUSG00000025488	cytochrome c oxidase subunit 8B [Source:MGI Symbol;Acc:MGI:105958]
ENSMUST00000026562	0.511756	-0.890002	3.87834	-0.22948	0.818496	NA	0.977805	0	0	0	2.09273	0	Ifitm5	ENSMUSG00000025489	interferon induced transmembrane protein 5 [Source:MGI Symbol;Acc:MGI:1934923]
ENSMUST00000026565	0.678823	0.284751	2.88764	0.0986105	0.921448	NA	0.977805	1.28369	0	0	1.04637	0.765079	Ifitm3	ENSMUSG00000025492	interferon induced transmembrane protein 3 [Source:MGI Symbol;Acc:MGI:1913391]
ENSMUST00000026568	92.901	-0.427531	0.19199	-2.22683	0.0259584	0.122798	86.0468	82.1561	69.4767	91.563	128.703	99.4603	Ptdss2	ENSMUSG00000025495	phosphatidylserine synthase 2 [Source:MGI Symbol;Acc:MGI:1351664]
ENSMUST00000026569	2.40615	0.392454	1.23083	0.318854	0.749837	NA	3.91122	2.56738	1.7589	0	3.1391	3.06032	Drd4	ENSMUSG00000025496	dopamine receptor D4 [Source:MGI Symbol;Acc:MGI:94926]
ENSMUST00000026572	0.959304	0.160316	2.33567	0.068638	0.945278	NA	0	1.28369	1.7589	1.94815	0	0.765079	Hras	ENSMUSG00000025499	Harvey rat sarcoma virus oncogene [Source:MGI Symbol;Acc:MGI:96224]
ENSMUST00000026573	170.228	-0.00206818	0.139818	-0.014792	0.988198	0.994455	162.316	159.178	187.323	175.333	175.789	161.432	Lmntd2	ENSMUSG00000025500	lamin tail domain containing 2 [Source:MGI Symbol;Acc:MGI:1919250]
ENSMUST00000026585	3.79639	1.17794	1.03437	1.1388	0.254786	NA	1.95561	10.2695	3.51781	3.8963	3.1391	0	Tspan4	ENSMUSG00000025511	tetraspanin 4 [Source:MGI Symbol;Acc:MGI:1928097]
ENSMUST00000026601	22.2741	0.785246	0.372838	2.10613	0.0351929	0.152859	29.3341	33.3759	21.9863	19.4815	15.6955	13.7714	Satl1	ENSMUSG00000025527	spermidine/spermine N1-acetyl transferase-like 1 [Source:MGI Symbol;Acc:MGI:1921059]
ENSMUST00000026608	7.41666	-1.17952	0.743754	-1.58591	0.11276	NA	6.84463	5.13476	1.7589	20.4556	4.18546	6.12064	Crcp	ENSMUSG00000025532	calcitonin gene-related peptide-receptor component protein [Source:MGI Symbol;Acc:MGI:1100818]
ENSMUST00000026617	1.8767	-2.23622	1.57892	-1.4163	0.156689	NA	0.977805	0	0.879451	2.92222	4.18546	2.29524	Phkg1	ENSMUSG00000025537	phosphorylase kinase gamma 1 [Source:MGI Symbol;Acc:MGI:97579]
ENSMUST00000026624	8.43022	0.777139	0.602887	1.28903	0.197388	NA	12.7115	10.2695	8.79451	5.84445	8.37092	4.59048	Tm9sf2	ENSMUSG00000025544	transmembrane 9 superfamily member 2 [Source:MGI Symbol;Acc:MGI:1915309]
ENSMUST00000026631	0.965204	0.0723471	2.49813	0.0289605	0.976896	NA	2.93341	0	0	0	2.09273	0.765079	Fgf14	ENSMUSG00000025551	fibroblast growth factor 14 [Source:MGI Symbol;Acc:MGI:109189]
ENSMUST00000026635	4.50238	1.10281	0.900885	1.22415	0.220897	NA	8.80024	6.41845	3.51781	2.92222	0	5.35556	Farp1	ENSMUSG00000025555	FERM, RhoGEF (Arhgef) and pleckstrin domain protein 1 (chondrocyte-derived) [Source:MGI Symbol;Acc:MGI:2446173]
ENSMUST00000026658	2.19211	1.04239	1.43266	0.727593	0.466863	NA	3.91122	5.13476	0	0	1.04637	3.06032	Tnrc6c	ENSMUSG00000025571	trinucleotide repeat containing 6C [Source:MGI Symbol;Acc:MGI:2443265]
ENSMUST00000026661	0.745355	-0.556393	2.91287	-0.191011	0.848517	NA	0	0	1.7589	1.94815	0	0.765079	Tk1	ENSMUSG00000025574	thymidine kinase 1 [Source:MGI Symbol;Acc:MGI:98763]
ENSMUST00000026662	2.4399	0.117465	1.19474	0.0983189	0.921679	NA	0.977805	1.28369	5.27671	1.94815	2.09273	3.06032	Cbx2	ENSMUSG00000025577	chromobox 2 [Source:MGI Symbol;Acc:MGI:88289]
ENSMUST00000026663	0.529115	-1.07725	3.79571	-0.283807	0.776558	NA	0	0	0.879451	0	0	2.29524	Cbx8	ENSMUSG00000025578	chromobox 8 [Source:MGI Symbol;Acc:MGI:1353589]
ENSMUST00000026665	2.49571	0.0718017	1.23198	0.0582817	0.953524	NA	4.88902	0	2.63835	4.87037	1.04637	1.53016	Cbx4	ENSMUSG00000039989	chromobox 4 [Source:MGI Symbol;Acc:MGI:1195985]
ENSMUST00000026667	0.814216	1.99521	3.02191	0.660248	0.509095	NA	3.91122	0	0	0.974075	0	0	Eif4a3	ENSMUSG00000025580	eukaryotic translation initiation factor 4A3 [Source:MGI Symbol;Acc:MGI:1923731]
ENSMUST00000026672	198.577	-0.192856	0.132929	-1.45082	0.14683	0.38195	173.071	188.702	194.359	188.971	226.015	220.343	Pde8a	ENSMUSG00000025584	phosphodiesterase 8A [Source:MGI Symbol;Acc:MGI:1277116]
ENSMUST00000026681	0.429421	-2.18309	4.00096	-0.545642	0.585312	NA	0	0	0	0	1.04637	1.53016	Tma16	ENSMUSG00000025591	translation machinery associated 16 [Source:MGI Symbol;Acc:MGI:1913532]
ENSMUST00000026698	3.87805	-0.210118	0.903374	-0.232592	0.816078	NA	5.86683	1.28369	3.51781	4.87037	3.1391	4.59048	Podxl	ENSMUSG00000025608	podocalyxin-like [Source:MGI Symbol;Acc:MGI:1351317]
ENSMUST00000026699	2.05941	0.869397	1.3089	0.664218	0.506551	NA	1.95561	2.56738	3.51781	0.974075	1.04637	2.29524	Mkln1	ENSMUSG00000025609	muskelin 1, intracellular mediator containing kelch motifs [Source:MGI Symbol;Acc:MGI:1351638]
ENSMUST00000026700	25.1221	0.427979	0.351281	1.21834	0.223095	0.487829	21.5117	34.6596	30.7808	16.5593	21.9737	25.2476	Map3k7cl	ENSMUSG00000025610	Map3k7 C-terminal like [Source:MGI Symbol;Acc:MGI:2446584]
ENSMUST00000026703	1.51835	0.774229	1.77161	0.43702	0.662097	NA	4.88902	0	0.879451	0	1.04637	2.29524	Bach1	ENSMUSG00000025612	BTB and CNC homology 1, basic leucine zipper transcription factor 1 [Source:MGI Symbol;Acc:MGI:894680]
ENSMUST00000026704	142.857	0.772701	0.173408	4.45598	8.35112e-06	0.000131775	166.227	198.972	175.011	138.319	95.2192	83.3937	Cct8	ENSMUSG00000025613	chaperonin containing Tcp1, subunit 8 (theta) [Source:MGI Symbol;Acc:MGI:107183]
ENSMUST00000026710	47.1093	0.0736784	0.256462	0.287287	0.773892	0.900331	50.8459	47.4965	46.6109	57.4704	36.6228	43.6095	Usp16	ENSMUSG00000025616	ubiquitin specific peptidase 16 [Source:MGI Symbol;Acc:MGI:1921362]
ENSMUST00000026723	2.12548	-1.61516	1.37346	-1.17598	0.239605	NA	0.977805	1.28369	0.879451	3.8963	4.18546	1.53016	Hprt	ENSMUSG00000025630	hypoxanthine guanine phosphoribosyl transferase [Source:MGI Symbol;Acc:MGI:96217]
ENSMUST00000026735	0.971665	-2.1393	2.54589	-0.840298	0.400742	NA	0	0	0.879451	0	4.18546	0.765079	Ccdc51	ENSMUSG00000025645	coiled-coil domain containing 51 [Source:MGI Symbol;Acc:MGI:1913908]
ENSMUST00000026760	0.324692	-1.763	4.03225	-0.437225	0.661948	NA	0	0	0	1.94815	0	0	Tmem47	ENSMUSG00000025666	transmembrane protein 47 [Source:MGI Symbol;Acc:MGI:2177570]
ENSMUST00000026795	0.488902	2.53872	3.9999	0.634697	0.525626	NA	2.93341	0	0	0	0	0	Alox5	ENSMUSG00000025701	arachidonate 5-lipoxygenase [Source:MGI Symbol;Acc:MGI:87999]
ENSMUST00000026827	2.20747	-1.22157	1.47167	-0.830052	0.406509	NA	0	1.28369	2.63835	7.7926	0	1.53016	Mettl26	ENSMUSG00000025731	methyltransferase like 26 [Source:MGI Symbol;Acc:MGI:1915597]
ENSMUST00000026833	0.308921	0.167149	4.08047	0.0409631	0.967325	NA	0	0	0.879451	0.974075	0	0	Wdr24	ENSMUSG00000025737	WD repeat domain 24 [Source:MGI Symbol;Acc:MGI:2446285]
ENSMUST00000026839	1.12258	-1.30614	2.0715	-0.630527	0.52835	NA	0.977805	0	0.879451	0.974075	3.1391	0.765079	Prps2	ENSMUSG00000025742	phosphoribosyl pyrophosphate synthetase 2 [Source:MGI Symbol;Acc:MGI:97776]
ENSMUST00000026841	1.38835	-1.72084	1.8421	-0.934172	0.350215	NA	0.977805	0	0.879451	3.8963	1.04637	1.53016	Hadhb	ENSMUSG00000059447	hydroxyacyl-Coenzyme A dehydrogenase/3-ketoacyl-Coenzyme A thiolase/enoyl-Coenzyme A hydratase (trifunctional protein), beta subunit [Source:MGI Symbol;Acc:MGI:2136381]
ENSMUST00000026858	0.586301	2.8114	3.89763	0.72131	0.470719	NA	0	0	3.51781	0	0	0	Plk4	ENSMUSG00000025758	polo like kinase 4 [Source:MGI Symbol;Acc:MGI:101783]
ENSMUST00000026859	6.28561	-0.170537	0.717328	-0.237738	0.812084	NA	6.84463	6.41845	4.39726	10.7148	6.27819	3.06032	Mfsd8	ENSMUSG00000025759	major facilitator superfamily domain containing 8 [Source:MGI Symbol;Acc:MGI:1919425]
ENSMUST00000026866	2.05736	0.937982	1.37197	0.683675	0.494181	NA	3.91122	2.56738	1.7589	0	1.04637	3.06032	Sclt1	ENSMUSG00000059834	sodium channel and clathrin linker 1 [Source:MGI Symbol;Acc:MGI:1914411]
ENSMUST00000026879	0.564569	0.261354	3.39707	0.0769351	0.938675	NA	0.977805	0	0.879451	0	0	1.53016	Gdap1	ENSMUSG00000025777	ganglioside-induced differentiation-associated-protein 1 [Source:MGI Symbol;Acc:MGI:1338002]
ENSMUST00000026886	5.37851	-0.259562	0.755132	-0.34373	0.731049	NA	5.86683	2.56738	6.15616	5.84445	4.18546	7.65079	Itih5	ENSMUSG00000025780	inter-alpha (globulin) inhibitor H5 [Source:MGI Symbol;Acc:MGI:1925751]
ENSMUST00000026888	6.43364	-0.174072	0.724697	-0.240199	0.810176	NA	8.80024	3.85107	5.27671	12.663	4.18546	3.8254	Taf3	ENSMUSG00000025782	TATA-box binding protein associated factor 3 [Source:MGI Symbol;Acc:MGI:2388097]
[truncated: 35,799 more rows]

## Sheet: |FC|>1,P<0.05
Transcript.stable.ID	baseMean	log2FoldChange	lfcSE	stat	pvalue	padj	ME1	ME2	ME3	WE1	WE2	WE3	Gene.name	Gene.stable.ID	Gene.description
[truncated: 362 more rows]
