# Supplementary material for: Targeted mRNP-phagy licenses translational activation during cellular metamorphosis
Source: Research Square preprint supplement (doi:10.21203/rs.3.rs-6289188/v1), 2025-05-06
Supplement: Supplementary file 6 [file 6e0480d29a0333d41a161a49.xlsx]

## Sheet: Sheet1
chr	start	end	feature_type	symbol
chr3	40900798	40900934	transcript	1700034I23Rik
chr3	40900798	40900934	exon	1700034I23Rik
chr3	40900798	40900934	transcript	Gm2011
chr3	40900798	40900934	transcript	Abhd18
chr3	40902142	40902262	transcript	1700034I23Rik
chr3	40902142	40902262	exon	1700034I23Rik
chr3	40902142	40902262	transcript	Gm2011
chr3	40902142	40902262	transcript	Abhd18
chr3	40901251	40901315	transcript	1700034I23Rik
chr3	40901251	40901315	exon	1700034I23Rik
chr3	40901251	40901315	transcript	Gm2011
chr3	40901251	40901315	transcript	Abhd18
chr18	36801867	36802000	transcript	Vaultrc5
chr18	36801867	36802000	exon	Vaultrc5
chr18	36802000	36802003	transcript	Vaultrc5
chr18	36802000	36802003	exon	Vaultrc5
chr3	40902271	40902367	transcript	1700034I23Rik
chr3	40902271	40902367	exon	1700034I23Rik
chr3	40902271	40902367	transcript	Gm2011
chr3	40902271	40902367	transcript	Abhd18
chr3	40901589	40901714	transcript	1700034I23Rik
chr3	40901589	40901714	exon	1700034I23Rik
chr3	40901589	40901714	transcript	Gm2011
chr3	40901589	40901714	transcript	Abhd18
chr17	13359758	13359902	exon	Tcp10c
chr17	13359758	13359902	CDS	Tcp10c
chr17	13359758	13359902	transcript	Tcp10c
chr3	40901857	40901920	transcript	1700034I23Rik
chr3	40901857	40901920	exon	1700034I23Rik
chr3	40901857	40901920	transcript	Gm2011
chr3	40901857	40901920	transcript	Abhd18
chr7	30743552	30743669	exon	Gapdhs
chr7	30743552	30743669	CDS	Gapdhs
chr7	30743552	30743669	5UTR	Gapdhs
chr7	30743552	30743669	start_codon	Gapdhs
chr7	30743552	30743669	transcript	Gapdhs
chr3	40902060	40902117	transcript	1700034I23Rik
chr3	40902060	40902117	exon	1700034I23Rik
chr3	40902060	40902117	transcript	Gm2011
chr3	40902060	40902117	transcript	Abhd18
chr3	40901354	40901404	transcript	1700034I23Rik
chr3	40901354	40901404	exon	1700034I23Rik
chr3	40901354	40901404	transcript	Gm2011
chr3	40901354	40901404	transcript	Abhd18
chr17	13061845	13061970	exon	Tcp10b
chr17	13061845	13061970	5UTR	Tcp10b
chr17	13061845	13061970	transcript	Tcp10b
chr17	13081558	13081811	exon	Tcp10b
chr17	13081558	13081811	CDS	Tcp10b
chr17	13081558	13081811	3UTR	Tcp10b
chr17	13081558	13081811	stop_codon	Tcp10b
chr17	13081558	13081811	transcript	Tcp10b
chr16	17894883	17895026	transcript	Tssk1
chr16	17894883	17895026	exon	Tssk1
chr16	17894883	17895026	CDS	Tssk1
chr17	13067644	13067745	exon	Tcp10b
chr17	13067644	13067745	CDS	Tcp10b
chr17	13067644	13067745	transcript	Tcp10b
chr3	96374022	96374128	.
chr11	62552253	62552462	transcript	Ubb
chr11	62552253	62552462	exon	Ubb
chr11	62552253	62552462	CDS	Ubb
chr17	13062327	13062440	exon	Tcp10b
chr17	13062327	13062440	5UTR	Tcp10b
chr17	13062327	13062440	CDS	Tcp10b
chr17	13062327	13062440	start_codon	Tcp10b
chr17	13062327	13062440	transcript	Tcp10b
chr17	13062849	13063039	exon	Tcp10b
chr17	13062849	13063039	CDS	Tcp10b
chr17	13062849	13063039	transcript	Tcp10b
chr1	72244317	72244406	transcript	D230017M19Rik
chr3	40901767	40901815	transcript	1700034I23Rik
chr3	40901767	40901815	exon	1700034I23Rik
chr3	40901767	40901815	transcript	Gm2011
chr3	40901767	40901815	transcript	Abhd18
chr1	79726562	79726715	exon	Wdfy1
chr1	79726562	79726715	CDS	Wdfy1
chr1	79726562	79726715	transcript	Wdfy1
chr13	119495135	119495518	transcript	Tmem267
chrX	93156657	93156857	transcript	1700003E24Rik
chrX	93156657	93156857	exon	1700003E24Rik
chrX	93156657	93156857	transcript	BC061195
chrX	93156657	93156857	exon	BC061195
chr17	13080069	13080189	exon	Tcp10b
chr17	13080069	13080189	CDS	Tcp10b
chr17	13080069	13080189	transcript	Tcp10b
chr17	13082039	13082216	exon	Tcp10b
chr17	13082039	13082216	3UTR	Tcp10b
chr17	13082039	13082216	transcript	Tcp10b
chr5	121520909	121521006	transcript	Adam1a
chr5	121520909	121521006	exon	Adam1a
chr5	121520909	121521006	CDS	Adam1a
chr5	121520405	121520764	transcript	Adam1a
chr5	121520405	121520764	exon	Adam1a
chr5	121520405	121520764	CDS	Adam1a
chr5	121520147	121520318	transcript	Adam1a
chr5	121520147	121520318	exon	Adam1a
chr5	121520147	121520318	CDS	Adam1a
chr13	119492657	119493009	exon	Tmem267
chr13	119492657	119493009	5UTR	Tmem267
chr13	119492657	119493009	CDS	Tmem267
chr13	119492657	119493009	start_codon	Tmem267
chr13	119492657	119493009	transcript	Tmem267
chr17	13069667	13069702	exon	Tcp10b
chr17	13069667	13069702	CDS	Tcp10b
chr17	13069667	13069702	transcript	Tcp10b
chr8	15041964	15042249	transcript	BB014433
chr8	15041964	15042249	exon	BB014433
chr5	121520769	121520888	transcript	Adam1a
chr5	121520769	121520888	exon	Adam1a
chr5	121520769	121520888	CDS	Adam1a
chr17	34971089	34971306	transcript	Hspa1a
chr17	34971089	34971306	exon	Hspa1a
chr17	34971089	34971306	CDS	Hspa1a
chr1	130461814	130461999	exon	Cd55
chr1	130461814	130461999	CDS	Cd55
chr1	130461814	130461999	transcript	Cd55
chr16	17894720	17894830	transcript	Tssk1
chr16	17894720	17894830	exon	Tssk1
chr16	17894720	17894830	CDS	Tssk1
chr5	121520329	121520405	transcript	Adam1a
chr5	121520329	121520405	exon	Adam1a
chr5	121520329	121520405	CDS	Adam1a
chr1	72237000	72237073	.
chr11	87422910	87423036	transcript	Tex14
chr17	12924431	12924561	transcript	Tcp1
chr17	12924431	12924561	exon	Tcp1
chr17	12924431	12924561	CDS	Tcp1
chr17	12924431	12924561	3UTR	Tcp1
chr17	12924431	12924561	stop_codon	Tcp1
chr17	12924431	12924561	exon	Acat3
chr17	12924431	12924561	3UTR	Acat3
chr17	12924431	12924561	transcript	Acat3
chr1	79724650	79724758	exon	Wdfy1
chr1	79724650	79724758	CDS	Wdfy1
chr1	79724650	79724758	transcript	Wdfy1
chr4	42871821	42871933	transcript	Fam205c
chr4	42871821	42871933	exon	Fam205c
chr4	42871821	42871933	CDS	Fam205c
chr14	46084300	46084396	transcript	Ubb-ps
chr1	172286261	172286380	exon	Atp1a2
chr1	172286261	172286380	CDS	Atp1a2
chr1	172286261	172286380	transcript	Atp1a2
chr8	24681456	24681558	exon	Adam3
chr8	24681456	24681558	CDS	Adam3
chr8	24681456	24681558	transcript	Adam3
chr17	15030535	15030665	exon	Gm3448
chr17	15030535	15030665	CDS	Gm3448
chr17	15030535	15030665	exon	Tcte3
chr17	15030535	15030665	CDS	Tcte3
chr17	15030535	15030665	exon	Gm3417
chr17	15030535	15030665	CDS	Gm3417
chr17	15030535	15030665	transcript	Gm3448
chr17	15030535	15030665	transcript	Tcte3
chr17	15030535	15030665	transcript	Gm3417
chr1	46139598	46139807	exon	Dnah7b
chr1	46139598	46139807	CDS	Dnah7b
chr1	46139598	46139807	transcript	Dnah7b
chr17	6493687	6494004	.
chr1	32545397	32545502	transcript	Gm5415
chr1	32545397	32545502	exon	Gm5415
chr1	32545397	32545502	CDS	Gm5415
chr1	32545397	32545502	transcript	Khdrbs2
chr5	105481266	105481460	transcript	Lrrc8b
chr5	105481266	105481460	exon	Lrrc8b
chr5	105481266	105481460	CDS	Lrrc8b
chr14	69502992	69503171	.
chr9	106557456	106557560	exon	Iqcf3
chr9	106557456	106557560	CDS	Iqcf3
chr9	106557456	106557560	transcript	Iqcf3
chr17	37114149	37114219	.
chr1	130458092	130458187	exon	Cd55
chr1	130458092	130458187	CDS	Cd55
chr1	130458092	130458187	transcript	Cd55
chr17	13061145	13061207	exon	Tcp10b
chr17	13061145	13061207	5UTR	Tcp10b
chr17	13061145	13061207	transcript	Tcp10b
chr2	177460389	177460453	.
chr17	13069702	13069767	exon	Tcp10b
chr17	13069702	13069767	CDS	Tcp10b
chr17	13069702	13069767	transcript	Tcp10b
chr7	29711586	29711726	exon	Catsperg2
chr7	29711586	29711726	CDS	Catsperg2
chr7	29711586	29711726	transcript	Catsperg2
chr17	13081903	13081976	exon	Tcp10b
chr17	13081903	13081976	3UTR	Tcp10b
chr17	13081903	13081976	transcript	Tcp10b
chr12	81421521	81421804	transcript	Adam4
chr12	81421521	81421804	exon	Adam4
chr12	81421521	81421804	CDS	Adam4
chr12	81421521	81421804	transcript	Cox16
chr12	81421521	81421804	transcript	Gm20498
chr15	98951465	98951670	transcript	Tuba1a
chr15	98951465	98951670	exon	Tuba1a
chr15	98951465	98951670	CDS	Tuba1a
chr10	85098522	85098878	transcript	Fhl4
chr10	85098522	85098878	exon	Fhl4
chr10	85098522	85098878	CDS	Fhl4
chr12	64473010	64473123	transcript	Fscb
chr12	64473010	64473123	exon	Fscb
chr12	64473010	64473123	CDS	Fscb
chr1	130459579	130459694	exon	Cd55
chr1	130459579	130459694	CDS	Cd55
chr1	130459579	130459694	transcript	Cd55
chr17	34971781	34971898	transcript	Hspa1a
chr17	34971781	34971898	exon	Hspa1a
chr17	34971781	34971898	CDS	Hspa1a
chr12	81420267	81420438	transcript	Adam4
chr12	81420267	81420438	exon	Adam4
chr12	81420267	81420438	CDS	Adam4
chr12	81420267	81420438	transcript	Cox16
chr12	81420267	81420438	transcript	Gm20498
chr7	105863063	105863180	.
chr17	13075617	13075691	exon	Tcp10b
chr17	13075617	13075691	CDS	Tcp10b
chr17	13075617	13075691	transcript	Tcp10b
chr1	72236973	72236981	.
chr16	10796625	10796754	transcript	Prm1
chr16	10796625	10796754	exon	Prm1
chr16	10796625	10796754	CDS	Prm1
chr16	10796625	10796754	5UTR	Prm1
chr16	10796625	10796754	start_codon	Prm1
chr17	6493445	6493561	.
chr7	30731901	30732065	exon	Gapdhs
chr7	30731901	30732065	CDS	Gapdhs
chr7	30731901	30732065	transcript	Gapdhs
chr1	46139966	46140071	exon	Dnah7b
chr1	46139966	46140071	CDS	Dnah7b
chr1	46139966	46140071	transcript	Dnah7b
chr1	32545567	32545642	transcript	Gm5415
chr1	32545567	32545642	exon	Gm5415
chr1	32545567	32545642	CDS	Gm5415
chr1	32545567	32545642	transcript	Khdrbs2
chr13	59526119	59526344	transcript	Agtpbp1
chr12	113491210	113491310	transcript	Adam6b
chr12	113491210	113491310	exon	Adam6b
chr12	113491210	113491310	CDS	Adam6b
chr6	85677923	85678028	exon	Alms1
chr6	85677923	85678028	CDS	Alms1
chr6	85677923	85678028	transcript	Alms1
chr7	29712725	29712835	exon	Catsperg2
chr7	29712725	29712835	CDS	Catsperg2
chr7	29712725	29712835	transcript	Catsperg2
chr17	13073474	13073586	exon	Tcp10b
chr17	13073474	13073586	CDS	Tcp10b
chr17	13073474	13073586	transcript	Tcp10b
chr7	29725191	29725342	exon	Catsperg2
chr7	29725191	29725342	CDS	Catsperg2
chr7	29725191	29725342	transcript	Catsperg2
chr16	21797118	21797208	transcript	1300002E11Rik
chr7	29717066	29717159	exon	Catsperg2
chr7	29717066	29717159	CDS	Catsperg2
chr7	29717066	29717159	transcript	Catsperg2
chr6	85678580	85678727	exon	Alms1
chr6	85678580	85678727	CDS	Alms1
chr6	85678580	85678727	transcript	Alms1
chr17	13066344	13066373	exon	Tcp10b
chr17	13066344	13066373	CDS	Tcp10b
chr17	13066344	13066373	transcript	Tcp10b
chr11	88844329	88844490	exon	Akap1
chr11	88844329	88844490	CDS	Akap1
chr11	88844329	88844490	transcript	Akap1
chr17	80213514	80213606	.
chr10	85097879	85098039	3UTR	Fhl4
chr10	85097879	85098039	transcript	Fhl4
chr10	85097879	85098039	exon	Fhl4
chr4	51228989	51229120	transcript	Cylc2
chr3	96328426	96328431	.
chr15	98950096	98950328	transcript	Tuba1a
chr15	98950096	98950328	exon	Tuba1a
chr15	98950096	98950328	CDS	Tuba1a
chr10	4354478	4354698	exon	Akap12
chr10	4354478	4354698	CDS	Akap12
chr10	4354478	4354698	transcript	Akap12
chr4	129489437	129489711	transcript	Tssk3
chr4	129489437	129489711	exon	Tssk3
chr4	129489437	129489711	CDS	Tssk3
chr7	29725380	29725589	exon	Catsperg2
chr7	29725380	29725589	CDS	Catsperg2
chr7	29725380	29725589	5UTR	Catsperg2
chr7	29725380	29725589	start_codon	Catsperg2
chr7	29725380	29725589	transcript	Catsperg2
chr6	29417071	29417251	exon	Ccdc136
chr6	29417071	29417251	CDS	Ccdc136
chr6	29417071	29417251	transcript	Ccdc136
chr16	17899356	17899602	transcript	Tssk2
chr16	17899356	17899602	exon	Tssk2
chr16	17899356	17899602	CDS	Tssk2
chr12	113489575	113489698	transcript	Adam6b
chr12	113489575	113489698	exon	Adam6b
chr12	113489575	113489698	CDS	Adam6b
chr10	85098151	85098304	transcript	Fhl4
chr10	85098151	85098304	exon	Fhl4
chr10	85098151	85098304	CDS	Fhl4
chr3	96422806	96422841	.
chr10	80386972	80387152	transcript	Mex3d
chr10	80386972	80387152	exon	Mex3d
chr10	80386972	80387152	CDS	Mex3d
chr17	40765090	40765338	exon	Crisp2
chr17	40765090	40765338	3UTR	Crisp2
chr17	40765090	40765338	CDS	Crisp2
chr17	40765090	40765338	stop_codon	Crisp2
chr17	40765090	40765338	transcript	Crisp2
chr16	10796493	10796533	transcript	Prm1
chr16	10796493	10796533	exon	Prm1
chr16	10796493	10796533	CDS	Prm1
chr11	88845460	88845737	exon	Akap1
chr11	88845460	88845737	CDS	Akap1
chr11	88845460	88845737	transcript	Akap1
chr10	80622807	80622952	exon	Csnk1g2
chr10	80622807	80622952	5UTR	Csnk1g2
chr10	80622807	80622952	transcript	Csnk1g2
chr1	172279369	172279468	exon	Atp1a2
chr1	172279369	172279468	CDS	Atp1a2
chr1	172279369	172279468	transcript	Atp1a2
chr7	29710432	29710537	exon	Catsperg2
chr7	29710432	29710537	CDS	Catsperg2
chr7	29710432	29710537	transcript	Catsperg2
chr12	113490888	113491028	transcript	Adam6b
chr12	113490888	113491028	exon	Adam6b
chr12	113490888	113491028	CDS	Adam6b
chr5	36661038	36661199	transcript	D5Ertd579e
chr7	29705380	29705490	exon	Catsperg2
chr7	29705380	29705490	CDS	Catsperg2
chr7	29705380	29705490	transcript	Catsperg2
chr8	26003444	26003538	transcript	Fnta
chr5	36630595	36630769	transcript	D5Ertd579e
chr7	30732195	30732342	exon	Gapdhs
chr7	30732195	30732342	CDS	Gapdhs
chr7	30732195	30732342	transcript	Gapdhs
chr7	29719430	29719588	exon	Catsperg2
chr7	29719430	29719588	CDS	Catsperg2
chr7	29719430	29719588	transcript	Catsperg2
chr1	32545723	32545804	transcript	Gm5415
chr1	32545723	32545804	exon	Gm5415
chr1	32545723	32545804	CDS	Gm5415
chr1	32545723	32545804	transcript	Khdrbs2
chr5	105452966	105453120	transcript	Lrrc8b
chr4	146166168	146166256	transcript	Zfp600
chr6	85899052	85899251	exon	Nat8f4
chr6	85899052	85899251	3UTR	Nat8f4
chr6	85899052	85899251	CDS	Nat8f4
chr6	85899052	85899251	stop_codon	Nat8f4
chr6	85899052	85899251	transcript	Nat8f4
chr10	80638704	80638792	transcript	Csnk1g2
chr10	80638704	80638792	exon	Csnk1g2
chr10	80638704	80638792	CDS	Csnk1g2
chr4	146166651	146166728	transcript	Zfp600
chr1	46140129	46140192	exon	Dnah7b
chr1	46140129	46140192	CDS	Dnah7b
chr1	46140129	46140192	transcript	Dnah7b
chr11	88835079	88835231	exon	Akap1
chr11	88835079	88835231	CDS	Akap1
chr11	88835079	88835231	transcript	Akap1
chr7	29711827	29711878	exon	Catsperg2
chr7	29711827	29711878	CDS	Catsperg2
chr7	29711827	29711878	transcript	Catsperg2
chr7	29705582	29705646	exon	Catsperg2
chr7	29705582	29705646	CDS	Catsperg2
chr7	29705582	29705646	transcript	Catsperg2
chr16	10788394	10788563	transcript	Tnp2
chr16	10788394	10788563	exon	Tnp2
chr16	10788394	10788563	CDS	Tnp2
chr18	60776929	60777092	transcript	Rps14
chr18	60776929	60777092	exon	Rps14
chr18	60776929	60777092	CDS	Rps14
chr6	29415430	29415658	exon	Ccdc136
chr6	29415430	29415658	CDS	Ccdc136
chr6	29415430	29415658	transcript	Ccdc136
chr7	30733051	30733171	exon	Gapdhs
chr7	30733051	30733171	CDS	Gapdhs
chr7	30733051	30733171	transcript	Gapdhs
chr9	106554206	106554227	exon	Iqcf3
chr9	106554206	106554227	CDS	Iqcf3
chr9	106554206	106554227	transcript	Iqcf3
chr17	13070845	13070925	exon	Tcp10b
chr17	13070845	13070925	CDS	Tcp10b
chr17	13070845	13070925	transcript	Tcp10b
chr6	135244080	135244380	transcript	Gsg1
chr6	135244080	135244380	exon	Gsg1
chr6	135244080	135244380	CDS	Gsg1
chr4	146166880	146166953	transcript	Zfp600
chr1	46249770	46249895	exon	Dnah7b
chr1	46249770	46249895	CDS	Dnah7b
chr1	46249770	46249895	transcript	Dnah7b
chr7	29714835	29714930	exon	Catsperg2
chr7	29714835	29714930	CDS	Catsperg2
chr7	29714835	29714930	transcript	Catsperg2
chr5	105481099	105481228	transcript	Lrrc8b
chr5	105481099	105481228	exon	Lrrc8b
chr5	105481099	105481228	CDS	Lrrc8b
chr6	103706413	103706637	exon	Chl1
chr6	103706413	103706637	CDS	Chl1
chr6	103706413	103706637	transcript	Chl1
chr6	85677612	85677689	exon	Alms1
chr6	85677612	85677689	CDS	Alms1
chr6	85677612	85677689	transcript	Alms1
chr4	51228583	51228719	transcript	Cylc2
chr10	80634213	80634410	transcript	Csnk1g2
chr10	80634213	80634410	exon	Csnk1g2
chr10	80634213	80634410	5UTR	Csnk1g2
chr11	116678465	116678566	exon	St6galnac2
chr11	116678465	116678566	CDS	St6galnac2
chr11	116678465	116678566	transcript	St6galnac2
chr12	64473136	64473206	transcript	Fscb
chr12	64473136	64473206	exon	Fscb
chr12	64473136	64473206	CDS	Fscb
chr17	37113950	37113999	.
chr10	80638182	80638308	transcript	Csnk1g2
chr10	80638182	80638308	exon	Csnk1g2
chr10	80638182	80638308	CDS	Csnk1g2
chr7	29712965	29713026	exon	Catsperg2
chr7	29712965	29713026	CDS	Catsperg2
chr7	29712965	29713026	transcript	Catsperg2
chr14	69503243	69503335	.
chr7	29698183	29698279	exon	Catsperg2
chr7	29698183	29698279	CDS	Catsperg2
chr7	29698183	29698279	transcript	Catsperg2
chr15	38226135	38226392	exon	Odf1
chr15	38226135	38226392	CDS	Odf1
chr15	38226135	38226392	transcript	Odf1
chr10	80638879	80638966	transcript	Csnk1g2
chr10	80638879	80638966	exon	Csnk1g2
chr10	80638879	80638966	CDS	Csnk1g2
chr15	75903078	75903261	exon	Eef1d
chr15	75903078	75903261	CDS	Eef1d
chr15	75903078	75903261	transcript	Eef1d
chr13	97030265	97030423	exon	1700029F12Rik
chr13	97030265	97030423	CDS	1700029F12Rik
chr13	97030265	97030423	transcript	1700029F12Rik
chr7	29698017	29698083	exon	Catsperg2
chr7	29698017	29698083	CDS	Catsperg2
chr7	29698017	29698083	transcript	Catsperg2
chr13	97034181	97034287	exon	1700029F12Rik
chr13	97034181	97034287	CDS	1700029F12Rik
chr13	97034181	97034287	5UTR	1700029F12Rik
chr13	97034181	97034287	start_codon	1700029F12Rik
chr13	97034181	97034287	transcript	1700029F12Rik
chr14	69482168	69482335	.
chr1	46126756	46126931	exon	Dnah7b
chr1	46126756	46126931	CDS	Dnah7b
chr1	46126756	46126931	transcript	Dnah7b
chr11	103542481	103542726	exon	Gm884
chr11	103542481	103542726	CDS	Gm884
chr11	103542481	103542726	transcript	Gm884
chr1	46233837	46234053	exon	Dnah7b
chr1	46233837	46234053	CDS	Dnah7b
chr1	46233837	46234053	transcript	Dnah7b
chr13	92575411	92575500	transcript	Spz1
chr13	92575411	92575500	exon	Spz1
chr13	92575411	92575500	CDS	Spz1
chr1	46116173	46116300	exon	Dnah7b
chr1	46116173	46116300	CDS	Dnah7b
chr1	46116173	46116300	transcript	Dnah7b
chr1	46123616	46123782	exon	Dnah7b
chr1	46123616	46123782	CDS	Dnah7b
chr1	46123616	46123782	transcript	Dnah7b
chr8	26003619	26003734	transcript	Fnta
chr11	116679906	116679930	exon	St6galnac2
chr11	116679906	116679930	CDS	St6galnac2
chr11	116679906	116679930	transcript	St6galnac2
chr7	29697788	29697870	exon	Catsperg2
chr7	29697788	29697870	CDS	Catsperg2
chr7	29697788	29697870	transcript	Catsperg2
chr5	105479838	105479957	transcript	Lrrc8b
chr5	105479838	105479957	exon	Lrrc8b
chr5	105479838	105479957	CDS	Lrrc8b
chr7	29706387	29706504	exon	Catsperg2
chr7	29706387	29706504	CDS	Catsperg2
chr7	29706387	29706504	transcript	Catsperg2
chr1	46141977	46142093	exon	Dnah7b
chr1	46141977	46142093	CDS	Dnah7b
chr1	46141977	46142093	transcript	Dnah7b
chr19	7494170	7494362	exon	Atl3
chr19	7494170	7494362	5UTR	Atl3
chr19	7494170	7494362	CDS	Atl3
chr19	7494170	7494362	start_codon	Atl3
chr19	7494170	7494362	transcript	Atl3
chr12	81420025	81420071	transcript	Adam4
chr12	81420025	81420071	exon	Adam4
chr12	81420025	81420071	CDS	Adam4
chr12	81420025	81420071	transcript	Cox16
chr12	81420025	81420071	transcript	Gm20498
chr6	72958052	72958205	5UTR	Tmsb10
chr6	72958052	72958205	transcript	Tmsb10
chr6	72958052	72958205	exon	Tmsb10
chr6	103711066	103711247	exon	Chl1
chr6	103711066	103711247	CDS	Chl1
chr6	103711066	103711247	transcript	Chl1
chr17	40767285	40767375	exon	Crisp2
chr17	40767285	40767375	CDS	Crisp2
chr17	40767285	40767375	transcript	Crisp2
chr7	29721036	29721112	exon	Catsperg2
chr7	29721036	29721112	CDS	Catsperg2
chr7	29721036	29721112	transcript	Catsperg2
chr3	94433410	94433641	transcript	Oaz3
chr3	94433410	94433641	exon	Oaz3
chr3	94433410	94433641	3UTR	Oaz3
chr3	94433410	94433641	CDS	Oaz3
chr7	29700618	29700712	exon	Catsperg2
chr7	29700618	29700712	CDS	Catsperg2
chr7	29700618	29700712	transcript	Catsperg2
chr15	38219458	38219708	exon	Odf1
chr15	38219458	38219708	CDS	Odf1
chr15	38219458	38219708	transcript	Odf1
chr4	146165944	146166010	transcript	Zfp600
chr4	145829399	145829528	exon	Znf41-ps
chr4	145829399	145829528	exon	Zfp991
chr4	145829399	145829528	3UTR	Zfp991
chr4	145829399	145829528	transcript	Znf41-ps
chr4	145829399	145829528	transcript	Zfp991
chr17	28071714	28071832	transcript	Tcp11
chr17	28071714	28071832	exon	Tcp11
chr17	28071714	28071832	CDS	Tcp11
chr2	122264469	122264787	exon	Sord
chr2	122264469	122264787	3UTR	Sord
chr2	122264469	122264787	transcript	Sord
chr2	18684184	18684482	exon	Bmi1
chr2	18684184	18684482	CDS	Bmi1
chr2	18684184	18684482	3UTR	Bmi1
chr2	18684184	18684482	stop_codon	Bmi1
chr2	18684184	18684482	transcript	Bmi1
chr14	46084396	46084455	transcript	Ubb-ps
chr14	46084396	46084455	exon	Ubb-ps
chr11	101552207	101552555	exon	Nbr1
chr11	101552207	101552555	5UTR	Nbr1
chr11	101552207	101552555	transcript	Nbr1
chr15	36245415	36245550	exon	Rnf19a
chr15	36245415	36245550	CDS	Rnf19a
chr15	36245415	36245550	transcript	Rnf19a
chr11	101575134	101575391	exon	Nbr1
chr11	101575134	101575391	CDS	Nbr1
chr11	101575134	101575391	transcript	Nbr1
chr1	46268604	46268768	exon	Dnah7b
chr1	46268604	46268768	CDS	Dnah7b
chr1	46268604	46268768	transcript	Dnah7b
chr5	73668618	73668729	exon	Spata18
chr5	73668618	73668729	CDS	Spata18
chr5	73668618	73668729	transcript	Spata18
chr7	111076083	111076227	transcript	Eif4g2
chr12	111712584	111712905	transcript	Bag5
chr12	111712584	111712905	exon	Bag5
chr12	111712584	111712905	5UTR	Bag5
chr18	21001433	21001541	exon	Rnf138
chr18	21001433	21001541	5UTR	Rnf138
chr18	21001433	21001541	transcript	Rnf138
chr15	82015877	82016118	exon	Desi1
chr15	82015877	82016118	CDS	Desi1
chr15	82015877	82016118	5UTR	Desi1
chr15	82015877	82016118	start_codon	Desi1
chr15	82015877	82016118	transcript	Desi1
chr3	40745607	40745785	exon	Hspa4l
chr3	40745607	40745785	5UTR	Hspa4l
chr3	40745607	40745785	CDS	Hspa4l
chr3	40745607	40745785	start_codon	Hspa4l
chr3	40745607	40745785	transcript	Hspa4l
chr19	42052717	42052905	transcript	4933411K16Rik
chr19	42052717	42052905	exon	4933411K16Rik
chr19	42052717	42052905	CDS	4933411K16Rik
chr19	42052717	42052905	transcript	Hoga1
chr5	103648636	103648955	transcript	1700016H13Rik
chr5	103648636	103648955	exon	1700016H13Rik
chr5	103648636	103648955	3UTR	1700016H13Rik
chr5	103648636	103648955	CDS	1700016H13Rik
chr5	103648636	103648955	stop_codon	1700016H13Rik
chr3	34050074	34050154	exon	Fxr1
chr3	34050074	34050154	CDS	Fxr1
chr3	34050074	34050154	transcript	Fxr1
chr14	69350702	69350872	exon	Entpd4b
chr14	69350702	69350872	CDS	Entpd4b
chr14	69350702	69350872	exon	Entpd4
chr14	69350702	69350872	CDS	Entpd4
chr14	69350702	69350872	transcript	Entpd4b
chr14	69350702	69350872	transcript	Entpd4
chr16	10791892	10792048	transcript	Prm2
chr16	10791892	10792048	exon	Prm2
chr16	10791892	10792048	CDS	Prm2
chr16	10791892	10792048	5UTR	Prm2
chr16	10791892	10792048	start_codon	Prm2
chr14	52902827	52902931	.
chr5	105485880	105486127	exon	Lrrc8b
chr5	105485880	105486127	CDS	Lrrc8b
chr5	105485880	105486127	3UTR	Lrrc8b
chr5	105485880	105486127	stop_codon	Lrrc8b
chr5	105485880	105486127	transcript	Lrrc8b
chr12	78714919	78715293	exon	Fam71d
chr12	78714919	78715293	CDS	Fam71d
chr12	78714919	78715293	transcript	Fam71d
chr1	46134526	46134709	exon	Dnah7b
chr1	46134526	46134709	CDS	Dnah7b
chr1	46134526	46134709	transcript	Dnah7b
chr17	27100067	27100169	transcript	Itpr3
chr15	98950531	98950596	transcript	Tuba1a
chr15	98950531	98950596	exon	Tuba1a
chr15	98950531	98950596	CDS	Tuba1a
chr5	73669438	73669560	exon	Spata18
chr5	73669438	73669560	CDS	Spata18
chr5	73669438	73669560	transcript	Spata18
chr17	6513956	6514098	.
chr9	75398619	75398752	exon	Mapk6
chr9	75398619	75398752	5UTR	Mapk6
chr9	75398619	75398752	transcript	Mapk6
chr6	29414785	29414981	exon	Ccdc136
chr6	29414785	29414981	CDS	Ccdc136
chr6	29414785	29414981	transcript	Ccdc136
chr2	26386903	26387167	transcript	Entr1
chr2	26386903	26387167	exon	Entr1
chr2	26386903	26387167	CDS	Entr1
chr6	29405942	29406192	exon	Ccdc136
chr6	29405942	29406192	CDS	Ccdc136
chr6	29405942	29406192	transcript	Ccdc136
chr1	46290757	46290891	exon	Dnah7b
chr1	46290757	46290891	CDS	Dnah7b
chr1	46290757	46290891	transcript	Dnah7b
chr3	34058196	34058234	exon	Fxr1
chr3	34058196	34058234	CDS	Fxr1
chr3	34058196	34058234	transcript	Fxr1
chr3	34058196	34058234	transcript	Dnajc19
chr19	42052361	42052518	transcript	4933411K16Rik
chr19	42052361	42052518	exon	4933411K16Rik
chr19	42052361	42052518	5UTR	4933411K16Rik
chr19	42052361	42052518	CDS	4933411K16Rik
chr19	42052361	42052518	start_codon	4933411K16Rik
chr19	42052361	42052518	transcript	Hoga1
chr11	116677021	116677248	exon	St6galnac2
chr11	116677021	116677248	3UTR	St6galnac2
chr11	116677021	116677248	transcript	St6galnac2
chr14	69503171	69503243	.
chr10	80638051	80638080	transcript	Csnk1g2
chr10	80638051	80638080	exon	Csnk1g2
chr10	80638051	80638080	CDS	Csnk1g2
chr13	64161939	64162083	exon	Habp4
chr13	64161939	64162083	5UTR	Habp4
chr13	64161939	64162083	CDS	Habp4
chr13	64161939	64162083	start_codon	Habp4
chr13	64161939	64162083	transcript	Habp4
chr7	101706481	101706587	exon	Clpb
chr7	101706481	101706587	CDS	Clpb
chr7	101706481	101706587	transcript	Clpb
chr12	55130625	55130790	exon	Fam177a2
chr12	55130625	55130790	CDS	Fam177a2
chr12	55130625	55130790	exon	Fam177a
chr12	55130625	55130790	CDS	Fam177a
chr12	55130625	55130790	transcript	Fam177a2
chr12	55130625	55130790	transcript	Fam177a
chr16	13981729	13981952	transcript	Ifitm7
chr16	13981729	13981952	exon	Ifitm7
chr16	13981729	13981952	3UTR	Ifitm7
chr15	81994385	81994533	exon	Desi1
chr15	81994385	81994533	3UTR	Desi1
chr15	81994385	81994533	transcript	Desi1
chr3	34049152	34049324	exon	Fxr1
chr3	34049152	34049324	CDS	Fxr1
chr3	34049152	34049324	transcript	Fxr1
chr7	29725071	29725089	exon	Catsperg2
chr7	29725071	29725089	CDS	Catsperg2
chr7	29725071	29725089	transcript	Catsperg2
chr13	8767043	8767070	exon	Adarb2
chr13	8767043	8767070	transcript	Adarb2
chr3	92583933	92584247	exon	Smcp
chr3	92583933	92584247	3UTR	Smcp
chr3	92583933	92584247	CDS	Smcp
chr3	92583933	92584247	stop_codon	Smcp
chr3	92583933	92584247	transcript	Smcp
chr17	40783237	40783336	exon	Crisp2
chr17	40783237	40783336	CDS	Crisp2
chr17	40783237	40783336	transcript	Crisp2
chr12	72784213	72784460	exon	Ppm1a
chr12	72784213	72784460	CDS	Ppm1a
chr12	72784213	72784460	transcript	Ppm1a
chr6	85901488	85901609	5UTR	Nat8f4
chr6	85901488	85901609	start_codon	Nat8f4
chr6	85901488	85901609	transcript	Nat8f4
chr6	85901488	85901609	exon	Nat8f4
chr6	85901488	85901609	CDS	Nat8f4
chr10	62286347	62286627	exon	Hk1
chr10	62286347	62286627	CDS	Hk1
chr10	62286347	62286627	transcript	Hk1
chr11	101120833	101120918	exon	Tubg1
chr11	101120833	101120918	CDS	Tubg1
chr11	101120833	101120918	transcript	Tubg1
chr10	88503729	88503960	exon	Chpt1
chr10	88503729	88503960	CDS	Chpt1
chr10	88503729	88503960	5UTR	Chpt1
chr10	88503729	88503960	start_codon	Chpt1
chr10	88503729	88503960	transcript	Chpt1
chr12	55408001	55408084	exon	Psma6
chr12	55408001	55408084	CDS	Psma6
chr12	55408001	55408084	transcript	Psma6
chr7	30730340	30730433	exon	Gapdhs
chr7	30730340	30730433	CDS	Gapdhs
chr7	30730340	30730433	transcript	Gapdhs
chr11	69939873	69940159	transcript	Ybx2
chr11	69939873	69940159	exon	Ybx2
chr11	69939873	69940159	CDS	Ybx2
chr7	105861799	105861876	.
chr19	7522068	7522208	exon	Atl3
chr19	7522068	7522208	CDS	Atl3
chr19	7522068	7522208	transcript	Atl3
chr6	103698104	103698231	exon	Chl1
chr6	103698104	103698231	CDS	Chl1
chr6	103698104	103698231	transcript	Chl1
chr7	29212392	29212509	transcript	Catsperg1
chr19	7532091	7532397	exon	Atl3
chr19	7532091	7532397	CDS	Atl3
chr19	7532091	7532397	transcript	Atl3
chr4	59610524	59610689	exon	Hsdl2
chr4	59610524	59610689	CDS	Hsdl2
chr4	59610524	59610689	transcript	Hsdl2
chr8	111011282	111011358	exon	Ddx19b
chr8	111011282	111011358	CDS	Ddx19b
chr8	111011282	111011358	transcript	Ddx19b
chr17	40783765	40783909	exon	Crisp2
chr17	40783765	40783909	CDS	Crisp2
chr17	40783765	40783909	transcript	Crisp2
chr6	29412907	29413088	exon	Ccdc136
chr6	29412907	29413088	CDS	Ccdc136
chr6	29412907	29413088	transcript	Ccdc136
chr8	111010775	111010917	exon	Ddx19b
chr8	111010775	111010917	CDS	Ddx19b
chr8	111010775	111010917	transcript	Ddx19b
chr17	15033346	15033385	exon	Gm3448
chr17	15033346	15033385	CDS	Gm3448
chr17	15033346	15033385	exon	Tcte3
chr17	15033346	15033385	CDS	Tcte3
chr17	15033346	15033385	exon	Gm3417
chr17	15033346	15033385	CDS	Gm3417
chr17	15033346	15033385	transcript	Gm3448
chr17	15033346	15033385	transcript	Tcte3
chr17	15033346	15033385	transcript	Gm3417
chr12	111710179	111710365	transcript	Bag5
chr12	111710179	111710365	exon	Bag5
chr12	111710179	111710365	CDS	Bag5
chr18	21008724	21008891	exon	Rnf138
chr18	21008724	21008891	5UTR	Rnf138
chr18	21008724	21008891	CDS	Rnf138
chr18	21008724	21008891	start_codon	Rnf138
chr18	21008724	21008891	transcript	Rnf138
chr2	136537169	136537444	exon	Ankef1
chr2	136537169	136537444	CDS	Ankef1
chr2	136537169	136537444	transcript	Ankef1
chr3	35932866	35933048	exon	Dcun1d1
chr3	35932866	35933048	5UTR	Dcun1d1
chr3	35932866	35933048	transcript	Dcun1d1
chr5	73666851	73666949	exon	Spata18
chr5	73666851	73666949	CDS	Spata18
chr5	73666851	73666949	transcript	Spata18
chr9	106552740	106552921	exon	Iqcf3
chr9	106552740	106552921	CDS	Iqcf3
chr9	106552740	106552921	transcript	Iqcf3
chr17	35010505	35010671	exon	Vars
chr17	35010505	35010671	CDS	Vars
chr17	35010505	35010671	transcript	Vars
chr4	33031436	33031588	exon	Ube2j1
chr4	33031436	33031588	5UTR	Ube2j1
chr4	33031436	33031588	CDS	Ube2j1
chr4	33031436	33031588	start_codon	Ube2j1
chr4	33031436	33031588	transcript	Ube2j1
chr8	40794796	40794891	5UTR	Adam20
chr8	40794796	40794891	start_codon	Adam20
chr8	40794796	40794891	transcript	Adam20
chr8	40794796	40794891	exon	Adam20
chr8	40794796	40794891	CDS	Adam20
chr17	40784988	40785080	exon	Crisp2
chr17	40784988	40785080	CDS	Crisp2
chr17	40784988	40785080	transcript	Crisp2
chr10	81178723	81178894	transcript	Eef2
chr10	81178723	81178894	exon	Eef2
chr10	81178723	81178894	CDS	Eef2
chr11	76218248	76218484	5UTR	Dbil5
chr11	76218248	76218484	start_codon	Dbil5
chr11	76218248	76218484	transcript	Dbil5
chr11	76218248	76218484	exon	Dbil5
chr11	76218248	76218484	CDS	Dbil5
chr8	111009284	111009344	exon	Ddx19b
chr8	111009284	111009344	CDS	Ddx19b
chr8	111009284	111009344	transcript	Ddx19b
chr11	69935960	69936249	transcript	Ybx2
chr11	69935960	69936249	exon	Ybx2
chr11	69935960	69936249	5UTR	Ybx2
chr11	69935960	69936249	CDS	Ybx2
chr11	69935960	69936249	start_codon	Ybx2
chr5	105453239	105453422	transcript	Lrrc8b
chr9	96333489	96333676	exon	Atp1b3
chr9	96333489	96333676	3UTR	Atp1b3
chr9	96333489	96333676	CDS	Atp1b3
chr9	96333489	96333676	stop_codon	Atp1b3
chr9	96333489	96333676	transcript	Atp1b3
chr1	46214285	46214479	exon	Dnah7b
chr1	46214285	46214479	CDS	Dnah7b
chr1	46214285	46214479	transcript	Dnah7b
chr8	23180099	23180217	exon	Gpat4
chr8	23180099	23180217	CDS	Gpat4
chr8	23180099	23180217	transcript	Gpat4
chr11	3717793	3717987	exon	Osbp2
chr11	3717793	3717987	CDS	Osbp2
chr11	3717793	3717987	5UTR	Osbp2
chr11	3717793	3717987	transcript	Osbp2
chr3	34061827	34062032	exon	Fxr1
chr3	34061827	34062032	CDS	Fxr1
chr3	34061827	34062032	transcript	Fxr1
chr3	34061827	34062032	transcript	Dnajc19
chr6	131375973	131376181	exon	Ybx3
chr6	131375973	131376181	CDS	Ybx3
chr6	131375973	131376181	transcript	Ybx3
chr10	80382003	80382150	transcript	Mex3d
chr10	80382003	80382150	exon	Mex3d
chr10	80382003	80382150	CDS	Mex3d
chr8	40753705	40753893	transcript	Adam25
chr8	40753705	40753893	exon	Adam25
chr8	40753705	40753893	CDS	Adam25
chrX	7076115	7076237	exon	Akap4
chrX	7076115	7076237	CDS	Akap4
chrX	7076115	7076237	transcript	Akap4
chr14	120933229	120933390	exon	Ipo5
chr14	120933229	120933390	CDS	Ipo5
chr14	120933229	120933390	transcript	Ipo5
chr3	94434463	94434550	transcript	Oaz3
chr3	94434463	94434550	exon	Oaz3
chr3	94434463	94434550	CDS	Oaz3
chr17	40786138	40786257	exon	Crisp2
chr17	40786138	40786257	CDS	Crisp2
chr17	40786138	40786257	transcript	Crisp2
chr19	7533949	7534194	CDS	Atl3
chr19	7533949	7534194	stop_codon	Atl3
chr19	7533949	7534194	transcript	Atl3
chr19	7533949	7534194	exon	Atl3
chr19	7533949	7534194	3UTR	Atl3
chr11	69820934	69821062	transcript	Spem1
chr11	69820934	69821062	exon	Spem1
chr11	69820934	69821062	CDS	Spem1
chr18	21001956	21002172	exon	Rnf138
chr18	21001956	21002172	5UTR	Rnf138
chr18	21001956	21002172	CDS	Rnf138
chr18	21001956	21002172	start_codon	Rnf138
chr18	21001956	21002172	transcript	Rnf138
chr7	29726510	29726638	transcript	Catsperg2
chr5	73659251	73659337	exon	Spata18
chr5	73659251	73659337	CDS	Spata18
chr5	73659251	73659337	transcript	Spata18
chr17	40207320	40207468	transcript	Pgk2
chr17	40207320	40207468	exon	Pgk2
chr17	40207320	40207468	CDS	Pgk2
chr5	134627708	134627776	exon	Eif4h
chr5	134627708	134627776	CDS	Eif4h
chr5	134627708	134627776	transcript	Eif4h
chr1	46276960	46277023	exon	Dnah7b
chr1	46276960	46277023	CDS	Dnah7b
chr1	46276960	46277023	transcript	Dnah7b
chr10	80634489	80634642	transcript	Csnk1g2
chr10	80634489	80634642	exon	Csnk1g2
chr10	80634489	80634642	CDS	Csnk1g2
chr11	88839632	88839752	exon	Akap1
chr11	88839632	88839752	CDS	Akap1
chr11	88839632	88839752	transcript	Akap1
chr3	138526614	138526856	transcript	Eif4e
chr4	95967317	95967558	exon	9530080O11Rik
chr4	95967317	95967558	exon	Hook1
chr4	95967317	95967558	5UTR	Hook1
chr4	95967317	95967558	CDS	Hook1
chr4	95967317	95967558	start_codon	Hook1
chr4	95967317	95967558	transcript	9530080O11Rik
chr4	95967317	95967558	transcript	Hook1
chr3	96854533	96854671	exon	Pdzk1
chr3	96854533	96854671	CDS	Pdzk1
chr3	96854533	96854671	transcript	Pdzk1
chr8	13836393	13836548	transcript	AF366264
chr8	13836393	13836548	exon	AF366264
chr8	13836393	13836548	3UTR	AF366264
chr14	75846202	75846291	transcript	Tpt1
chr14	75846202	75846291	exon	Tpt1
chr14	75846202	75846291	CDS	Tpt1
chr6	29417931	29418102	exon	Ccdc136
chr6	29417931	29418102	CDS	Ccdc136
chr6	29417931	29418102	transcript	Ccdc136
chr6	135241244	135241398	transcript	Gsg1
chr6	135241244	135241398	exon	Gsg1
chr6	135241244	135241398	CDS	Gsg1
chr3	34068914	34069254	exon	Fxr1
chr3	34068914	34069254	CDS	Fxr1
chr3	34068914	34069254	3UTR	Fxr1
chr3	34068914	34069254	stop_codon	Fxr1
chr3	34068914	34069254	transcript	Fxr1
chr3	34068914	34069254	transcript	Dnajc19
chr1	46243306	46243436	exon	Dnah7b
chr1	46243306	46243436	CDS	Dnah7b
chr1	46243306	46243436	transcript	Dnah7b
chr14	75845616	75845693	transcript	Tpt1
chr14	75845616	75845693	exon	Tpt1
chr14	75845616	75845693	CDS	Tpt1
chr19	7509982	7510127	exon	Atl3
chr19	7509982	7510127	CDS	Atl3
chr19	7509982	7510127	transcript	Atl3
chr11	3705388	3705570	exon	Osbp2
chr11	3705388	3705570	CDS	Osbp2
chr11	3705388	3705570	transcript	Osbp2
chr6	135240072	135240185	transcript	Gsg1
chr6	135240072	135240185	exon	Gsg1
chr6	135240072	135240185	CDS	Gsg1
chr8	46524945	46525078	exon	Acsl1
chr8	46524945	46525078	CDS	Acsl1
chr8	46524945	46525078	transcript	Acsl1
chr11	100445469	100445653	exon	Klhl10
chr11	100445469	100445653	CDS	Klhl10
chr11	100445469	100445653	transcript	Klhl10
chr11	101571901	101571937	exon	Nbr1
chr11	101571901	101571937	CDS	Nbr1
chr11	101571901	101571937	transcript	Nbr1
chr2	122809280	122809363	exon	Sqor
chr2	122809280	122809363	CDS	Sqor
chr2	122809280	122809363	3UTR	Sqor
chr2	122809280	122809363	stop_codon	Sqor
chr2	122809280	122809363	transcript	Sqor
chr3	34068160	34068253	exon	Fxr1
chr3	34068160	34068253	CDS	Fxr1
chr3	34068160	34068253	transcript	Fxr1
chr3	34068160	34068253	transcript	Dnajc19
chr3	152209834	152210031	exon	Dnajb4
chr3	152209834	152210031	5UTR	Dnajb4
chr3	152209834	152210031	transcript	Dnajb4
chr17	35015593	35015885	exon	Vars
chr17	35015593	35015885	CDS	Vars
chr17	35015593	35015885	transcript	Vars
chr11	103542792	103542877	exon	Gm884
chr11	103542792	103542877	CDS	Gm884
chr11	103542792	103542877	transcript	Gm884
chr17	34977691	34977839	transcript	Hspa1l
chr17	34977691	34977839	exon	Hspa1l
chr17	34977691	34977839	CDS	Hspa1l
chr4	43443064	43443220	transcript	Tesk1
chr4	43443064	43443220	exon	Tesk1
chr4	43443064	43443220	5UTR	Tesk1
chr8	111020959	111021096	exon	Ddx19b
chr8	111020959	111021096	CDS	Ddx19b
chr8	111020959	111021096	transcript	Ddx19b
chr9	123461864	123462037	exon	Lars2
chr9	123461864	123462037	3UTR	Lars2
chr9	123461864	123462037	transcript	Lars2
chr3	96240093	96240216	transcript	H2ac19
chr3	96240093	96240216	exon	H2ac19
chr3	96240093	96240216	CDS	H2ac19
chr3	96240093	96240216	transcript	H2ac18
chr3	96240093	96240216	exon	H2ac18
chr3	96240093	96240216	CDS	H2ac18
chr5	135000520	135000655	exon	Wbscr25
chr5	135000520	135000655	transcript	Wbscr25
chr4	109056509	109056649	exon	Nrd1
chr4	109056509	109056649	CDS	Nrd1
chr4	109056509	109056649	transcript	Nrd1
chr7	29700361	29700413	exon	Catsperg2
chr7	29700361	29700413	CDS	Catsperg2
chr7	29700361	29700413	transcript	Catsperg2
chr8	111008775	111008844	exon	Ddx19b
chr8	111008775	111008844	CDS	Ddx19b
chr8	111008775	111008844	transcript	Ddx19b
chr12	54239274	54239316	transcript	1700104L18Rik
chr12	55138894	55139048	exon	Fam177a2
chr12	55138894	55139048	CDS	Fam177a2
chr12	55138894	55139048	3UTR	Fam177a2
chr12	55138894	55139048	stop_codon	Fam177a2
chr12	55138894	55139048	exon	Fam177a
chr12	55138894	55139048	CDS	Fam177a
chr12	55138894	55139048	3UTR	Fam177a
chr12	55138894	55139048	stop_codon	Fam177a
chr12	55138894	55139048	transcript	Fam177a2
chr12	55138894	55139048	transcript	Fam177a
chr8	46513290	46513391	exon	Acsl1
chr8	46513290	46513391	CDS	Acsl1
chr8	46513290	46513391	transcript	Acsl1
chr11	3717096	3717215	exon	Osbp2
chr11	3717096	3717215	CDS	Osbp2
chr11	3717096	3717215	5UTR	Osbp2
chr11	3717096	3717215	start_codon	Osbp2
chr11	3717096	3717215	transcript	Osbp2
chr4	40948046	40948235	exon	Bag1
chr4	40948046	40948235	5UTR	Bag1
chr4	40948046	40948235	CDS	Bag1
chr4	40948046	40948235	start_codon	Bag1
chr4	40948046	40948235	transcript	Bag1
chr2	151718407	151718686	exon	Psmf1
chr2	151718407	151718686	3UTR	Psmf1
chr2	151718407	151718686	CDS	Psmf1
chr2	151718407	151718686	stop_codon	Psmf1
chr2	151718407	151718686	transcript	Psmf1
chr15	98950443	98950507	transcript	Tuba1a
chr15	98950443	98950507	exon	Tuba1a
chr15	98950443	98950507	CDS	Tuba1a
chr2	122807953	122808133	exon	Sqor
chr2	122807953	122808133	CDS	Sqor
chr2	122807953	122808133	transcript	Sqor
chr1	46137415	46137494	exon	Dnah7b
chr1	46137415	46137494	CDS	Dnah7b
chr1	46137415	46137494	transcript	Dnah7b
chr14	31251028	31251181	exon	Phf7
chr14	31251028	31251181	5UTR	Phf7
chr14	31251028	31251181	transcript	Phf7
chr15	58898672	58898849	CDS	Rnf139
chr15	58898672	58898849	transcript	Tatdn1
chr15	58898672	58898849	transcript	Rnf139
chr15	58898672	58898849	exon	Rnf139
chr4	44152432	44152554	exon	Rnf38
chr4	44152432	44152554	CDS	Rnf38
chr4	44152432	44152554	5UTR	Rnf38
chr4	44152432	44152554	start_codon	Rnf38
chr4	44152432	44152554	transcript	Rnf38
chr8	46518274	46518301	exon	Acsl1
chr8	46518274	46518301	CDS	Acsl1
chr8	46518274	46518301	transcript	Acsl1
chr17	28079942	28080297	transcript	Tcp11
chr17	28079942	28080297	exon	Tcp11
chr17	28079942	28080297	CDS	Tcp11
chr17	28079942	28080297	5UTR	Tcp11
chr17	28079942	28080297	start_codon	Tcp11
chr2	136554685	136554824	exon	Ankef1
chr2	136554685	136554824	CDS	Ankef1
chr2	136554685	136554824	transcript	Ankef1
chr12	55108523	55108665	exon	Srp54a
chr12	55108523	55108665	CDS	Srp54a
chr12	55108523	55108665	transcript	Srp54a
chr4	146546116	146546196	exon	1700095A21Rik
chr4	146546116	146546196	transcript	1700095A21Rik
chr1	46337467	46337592	exon	Dnah7b
chr1	46337467	46337592	CDS	Dnah7b
chr1	46337467	46337592	transcript	Dnah7b
chr10	4358849	4359026	exon	Akap12
chr10	4358849	4359026	3UTR	Akap12
chr10	4358849	4359026	transcript	Akap12
chr19	7509347	7509561	exon	Atl3
chr19	7509347	7509561	CDS	Atl3
chr19	7509347	7509561	transcript	Atl3
chr5	73651467	73651673	exon	Spata18
chr5	73651467	73651673	5UTR	Spata18
chr5	73651467	73651673	CDS	Spata18
chr5	73651467	73651673	start_codon	Spata18
chr5	73651467	73651673	transcript	Spata18
chr1	46358128	46358222	exon	Dnah7b
chr1	46358128	46358222	CDS	Dnah7b
chr1	46358128	46358222	transcript	Dnah7b
chr18	42149724	42149856	exon	Sh3rf2
chr18	42149724	42149856	CDS	Sh3rf2
chr18	42149724	42149856	transcript	Sh3rf2
chr16	10788036	10788092	transcript	Tnp2
chr16	10788036	10788092	exon	Tnp2
chr16	10788036	10788092	3UTR	Tnp2
chr16	10788036	10788092	CDS	Tnp2
chr16	10788036	10788092	stop_codon	Tnp2
chr11	69668847	69668996	transcript	Eif4a1
chr4	147512999	147513087	exon	Zfp982
chr4	147512999	147513087	CDS	Zfp982
chr4	147512999	147513087	transcript	Zfp982
chr7	43980172	43980262	transcript	Klk1b9
chr7	43980172	43980262	exon	Klk1b9
chr7	43980172	43980262	CDS	Klk1b9
chr10	95549247	95549451	exon	Nudt4
chr10	95549247	95549451	3UTR	Nudt4
chr10	95549247	95549451	CDS	Nudt4
chr10	95549247	95549451	stop_codon	Nudt4
chr10	95549247	95549451	transcript	Nudt4
chr12	110668466	110668758	exon	1700001K19Rik
chr12	110668466	110668758	CDS	1700001K19Rik
chr12	110668466	110668758	transcript	1700001K19Rik
chr9	96345764	96345887	exon	Atp1b3
chr9	96345764	96345887	CDS	Atp1b3
chr9	96345764	96345887	5UTR	Atp1b3
chr9	96345764	96345887	start_codon	Atp1b3
chr9	96345764	96345887	transcript	Atp1b3
chr10	80520354	80520463	exon	Atp8b3
chr10	80520354	80520463	CDS	Atp8b3
chr10	80520354	80520463	transcript	Atp8b3
chr4	96022174	96022390	exon	Hook1
chr4	96022174	96022390	CDS	Hook1
chr4	96022174	96022390	3UTR	Hook1
chr4	96022174	96022390	stop_codon	Hook1
chr4	96022174	96022390	transcript	Hook1
chrX	150312879	150312996	transcript	Gm15104
chrX	150312879	150312996	exon	Gm15104
chrX	150312879	150312996	CDS	Gm15104
chrX	150312879	150312996	stop_codon	Gm15104
chr15	38226392	38226570	exon	Odf1
chr15	38226392	38226570	CDS	Odf1
chr15	38226392	38226570	transcript	Odf1
chr10	85102311	85102452	exon	Fhl4
chr10	85102311	85102452	5UTR	Fhl4
chr10	85102311	85102452	transcript	Fhl4
chr11	88841168	88841303	exon	Akap1
chr11	88841168	88841303	CDS	Akap1
chr11	88841168	88841303	transcript	Akap1
chr5	142529855	142530044	transcript	Papolb
chr5	142529855	142530044	exon	Papolb
chr5	142529855	142530044	CDS	Papolb
chr5	142529855	142530044	5UTR	Papolb
chr5	142529855	142530044	start_codon	Papolb
chr5	142529855	142530044	transcript	Radil
chr4	109056289	109056322	exon	Nrd1
chr4	109056289	109056322	CDS	Nrd1
chr4	109056289	109056322	transcript	Nrd1
chr7	30732611	30732694	exon	Gapdhs
chr7	30732611	30732694	CDS	Gapdhs
chr7	30732611	30732694	transcript	Gapdhs
chr1	80322858	80323057	exon	Cul3
chr1	80322858	80323057	5UTR	Cul3
chr1	80322858	80323057	CDS	Cul3
chr1	80322858	80323057	transcript	Cul3
chr11	103541806	103541928	exon	Gm884
chr11	103541806	103541928	CDS	Gm884
chr11	103541806	103541928	transcript	Gm884
chr8	46533365	46533468	exon	Acsl1
chr8	46533365	46533468	CDS	Acsl1
chr8	46533365	46533468	transcript	Acsl1
chr9	44091211	44091323	exon	Usp2
chr9	44091211	44091323	CDS	Usp2
chr9	44091211	44091323	transcript	Usp2
chr2	29915207	29915318	exon	Odf2
chr2	29915207	29915318	CDS	Odf2
chr2	29915207	29915318	transcript	Odf2
chr11	88991283	88991532	exon	Coil
chr11	88991283	88991532	3UTR	Coil
chr11	88991283	88991532	transcript	Coil
chr17	6326577	6326652	.
chr18	25168526	25168686	exon	Tpgs2
chr18	25168526	25168686	CDS	Tpgs2
chr18	25168526	25168686	5UTR	Tpgs2
chr18	25168526	25168686	start_codon	Tpgs2
chr18	25168526	25168686	transcript	Tpgs2
chr3	116423708	116423833	exon	Cdc14a
chr3	116423708	116423833	5UTR	Cdc14a
chr3	116423708	116423833	transcript	Cdc14a
chr8	46518267	46518274	exon	Acsl1
chr8	46518267	46518274	CDS	Acsl1
chr8	46518267	46518274	transcript	Acsl1
chr19	42053253	42053376	transcript	4933411K16Rik
chr19	42053253	42053376	exon	4933411K16Rik
chr19	42053253	42053376	CDS	4933411K16Rik
chr19	42053253	42053376	3UTR	4933411K16Rik
chr19	42053253	42053376	stop_codon	4933411K16Rik
chr19	42053253	42053376	transcript	Hoga1
chr3	34047631	34047749	exon	Fxr1
chr3	34047631	34047749	CDS	Fxr1
chr3	34047631	34047749	transcript	Fxr1
chr8	24813420	24813571	exon	Adam5
chr8	24813420	24813571	CDS	Adam5
chr8	24813420	24813571	transcript	Adam5
chr14	69349084	69349273	exon	Entpd4b
chr14	69349084	69349273	CDS	Entpd4b
chr14	69349084	69349273	exon	Entpd4
chr14	69349084	69349273	CDS	Entpd4
chr14	69349084	69349273	transcript	Entpd4b
chr14	69349084	69349273	transcript	Entpd4
chr4	145456065	145456125	.
chr6	103699139	103699202	exon	Chl1
chr6	103699139	103699202	CDS	Chl1
chr6	103699139	103699202	transcript	Chl1
chr1	46299834	46299943	exon	Dnah7b
chr1	46299834	46299943	CDS	Dnah7b
chr1	46299834	46299943	transcript	Dnah7b
chr7	29709808	29709893	exon	Catsperg2
chr7	29709808	29709893	CDS	Catsperg2
chr7	29709808	29709893	transcript	Catsperg2
chr6	129322633	129322833	transcript	Clec2m
chr6	129322633	129322833	exon	Clec2m
chr6	129322633	129322833	3UTR	Clec2m
chr17	28074651	28074744	transcript	Tcp11
chr17	28074651	28074744	exon	Tcp11
chr17	28074651	28074744	CDS	Tcp11
chr18	70476099	70476192	exon	Stard6
chr18	70476099	70476192	5UTR	Stard6
chr18	70476099	70476192	CDS	Stard6
chr18	70476099	70476192	start_codon	Stard6
chr18	70476099	70476192	transcript	Stard6
chr14	69361783	69361937	exon	Entpd4b
chr14	69361783	69361937	CDS	Entpd4b
chr14	69361783	69361937	exon	Entpd4
chr14	69361783	69361937	CDS	Entpd4
chr14	69361783	69361937	transcript	Entpd4b
chr14	69361783	69361937	transcript	Entpd4
chr7	101779203	101779364	exon	Clpb
chr7	101779203	101779364	CDS	Clpb
chr7	101779203	101779364	transcript	Clpb
chr4	138262383	138262642	exon	Kif17
chr4	138262383	138262642	5UTR	Kif17
chr4	138262383	138262642	CDS	Kif17
chr4	138262383	138262642	start_codon	Kif17
chr4	138262383	138262642	transcript	Kif17
chr9	107928919	107929056	transcript	Actl11
chr9	107928919	107929056	exon	Actl11
chr9	107928919	107929056	CDS	Actl11
chr11	87462420	87462517	transcript	Tex14
chr12	10377157	10377288	exon	Nt5c1b
chr12	10377157	10377288	CDS	Nt5c1b
chr12	10377157	10377288	transcript	Nt5c1b
chr9	40803588	40803677	transcript	Hspa8
chr9	40803588	40803677	transcript	Snord14c
chr9	40803588	40803677	exon	Snord14c
chr4	138455027	138455334	transcript	Camk2n1
chr4	138455027	138455334	exon	Camk2n1
chr4	138455027	138455334	5UTR	Camk2n1
chr4	138455027	138455334	CDS	Camk2n1
chr4	138455027	138455334	start_codon	Camk2n1
chr5	125387753	125387822	transcript	Ubc
chr5	125387753	125387822	exon	Ubc
chr5	125387753	125387822	CDS	Ubc
chr9	44075987	44076078	exon	Usp2
chr9	44075987	44076078	CDS	Usp2
chr9	44075987	44076078	transcript	Usp2
chr14	31238336	31238470	exon	Phf7
chr14	31238336	31238470	3UTR	Phf7
chr14	31238336	31238470	CDS	Phf7
chr14	31238336	31238470	stop_codon	Phf7
chr14	31238336	31238470	transcript	Phf7
chr11	88834676	88834730	exon	Akap1
chr11	88834676	88834730	CDS	Akap1
chr11	88834676	88834730	transcript	Akap1
chr2	34608524	34608713	transcript	Mapkap1
chr17	46682731	46682891	transcript	Mea1
chr17	46682731	46682891	exon	Mea1
chr17	46682731	46682891	CDS	Mea1
chr17	46682731	46682891	3UTR	Mea1
chr17	46682731	46682891	stop_codon	Mea1
chr11	101571302	101571434	exon	Nbr1
chr11	101571302	101571434	CDS	Nbr1
chr11	101571302	101571434	transcript	Nbr1
chr6	103708421	103708456	exon	Chl1
chr6	103708421	103708456	CDS	Chl1
chr6	103708421	103708456	transcript	Chl1
chr8	46526243	46526379	exon	Acsl1
chr8	46526243	46526379	CDS	Acsl1
chr8	46526243	46526379	transcript	Acsl1
chr19	7521109	7521203	exon	Atl3
chr19	7521109	7521203	CDS	Atl3
chr19	7521109	7521203	transcript	Atl3
chr8	46492816	46493027	exon	Acsl1
chr8	46492816	46493027	5UTR	Acsl1
chr8	46492816	46493027	CDS	Acsl1
chr8	46492816	46493027	start_codon	Acsl1
chr8	46492816	46493027	transcript	Acsl1
chr8	23179763	23179825	exon	Gpat4
chr8	23179763	23179825	CDS	Gpat4
chr8	23179763	23179825	transcript	Gpat4
chr1	46290627	46290735	exon	Dnah7b
chr1	46290627	46290735	CDS	Dnah7b
chr1	46290627	46290735	transcript	Dnah7b
chr4	111799069	111799255	exon	Spata6
chr4	111799069	111799255	CDS	Spata6
chr4	111799069	111799255	transcript	Spata6
chr15	81994145	81994258	exon	Desi1
chr15	81994145	81994258	3UTR	Desi1
chr15	81994145	81994258	transcript	Desi1
chr16	10788264	10788322	transcript	Tnp2
chr16	10788264	10788322	exon	Tnp2
chr16	10788264	10788322	CDS	Tnp2
chr18	21020887	21021000	exon	Rnf138
chr18	21020887	21021000	CDS	Rnf138
chr18	21020887	21021000	transcript	Rnf138
chr17	40764766	40764910	exon	Crisp2
chr17	40764766	40764910	3UTR	Crisp2
chr17	40764766	40764910	transcript	Crisp2
chr1	46226914	46227047	exon	Dnah7b
chr1	46226914	46227047	CDS	Dnah7b
chr1	46226914	46227047	transcript	Dnah7b
chr8	23191438	23191657	exon	Gpat4
chr8	23191438	23191657	5UTR	Gpat4
chr8	23191438	23191657	transcript	Gpat4
chr1	88205543	88205682	transcript	Dnajb3
chr1	88205543	88205682	exon	Dnajb3
chr1	88205543	88205682	CDS	Dnajb3
chr1	88205543	88205682	5UTR	Dnajb3
chr1	88205543	88205682	start_codon	Dnajb3
chr1	88205543	88205682	transcript	Ugt1a2
chr1	88205543	88205682	transcript	Ugt1a6a
chr1	88205543	88205682	transcript	Ugt1a6b
chr1	88205543	88205682	transcript	Ugt1a5
chr1	88205543	88205682	transcript	Ugt1a7c
chr1	88205543	88205682	transcript	Ugt1a9
chr1	88205543	88205682	transcript	Ugt1a10
chr8	46513666	46513752	exon	Acsl1
chr8	46513666	46513752	CDS	Acsl1
chr8	46513666	46513752	transcript	Acsl1
chr17	40793234	40793321	exon	Crisp2
chr17	40793234	40793321	5UTR	Crisp2
chr17	40793234	40793321	transcript	Crisp2
chr7	30733251	30733343	exon	Gapdhs
chr7	30733251	30733343	CDS	Gapdhs
chr7	30733251	30733343	transcript	Gapdhs
chr14	31237982	31238154	exon	Phf7
chr14	31237982	31238154	3UTR	Phf7
chr14	31237982	31238154	transcript	Phf7
chr1	172279780	172279827	exon	Atp1a2
chr1	172279780	172279827	CDS	Atp1a2
chr1	172279780	172279827	transcript	Atp1a2
chr3	64725292	64725368	transcript	Vmn2r-ps11
chr3	116308220	116308300	exon	Cdc14a
chr3	116308220	116308300	CDS	Cdc14a
chr3	116308220	116308300	transcript	Cdc14a
chr5	19402539	19402660	transcript	Magi2
chr9	75409201	75409312	exon	Mapk6
chr9	75409201	75409312	5UTR	Mapk6
chr9	75409201	75409312	transcript	Mapk6
chr4	111805930	111806031	exon	Spata6
chr4	111805930	111806031	CDS	Spata6
chr4	111805930	111806031	transcript	Spata6
chr7	25398433	25398611	transcript	4732471J01Rik
chr6	131388017	131388288	exon	Ybx3
chr6	131388017	131388288	CDS	Ybx3
chr6	131388017	131388288	5UTR	Ybx3
chr6	131388017	131388288	start_codon	Ybx3
chr6	131388017	131388288	transcript	Ybx3
chr11	88833141	88833216	exon	Akap1
chr11	88833141	88833216	CDS	Akap1
chr11	88833141	88833216	transcript	Akap1
chr6	140028323	140028512	exon	Plcz1
chr6	140028323	140028512	CDS	Plcz1
chr6	140028323	140028512	transcript	Plcz1
chr11	101124969	101125082	exon	Tubg1
chr11	101124969	101125082	CDS	Tubg1
chr11	101124969	101125082	transcript	Tubg1
chr13	33925308	33925380	exon	Serpinb6a
chr13	33925308	33925380	CDS	Serpinb6a
chr13	33925308	33925380	transcript	Serpinb6a
chr17	33433224	33433350	transcript	Actl9
chr17	33433224	33433350	exon	Actl9
chr17	33433224	33433350	CDS	Actl9
chr2	136550214	136550325	exon	Ankef1
chr2	136550214	136550325	CDS	Ankef1
chr2	136550214	136550325	transcript	Ankef1
chr3	121207258	121207425	exon	Tlcd4
chr3	121207258	121207425	CDS	Tlcd4
chr3	121207258	121207425	transcript	Tlcd4
chr2	29917609	29917714	exon	Odf2
chr2	29917609	29917714	CDS	Odf2
chr2	29917609	29917714	transcript	Odf2
chr14	69354450	69354553	exon	Entpd4b
chr14	69354450	69354553	CDS	Entpd4b
chr14	69354450	69354553	exon	Entpd4
chr14	69354450	69354553	CDS	Entpd4
chr14	69354450	69354553	transcript	Entpd4b
chr14	69354450	69354553	transcript	Entpd4
chr2	136553677	136553783	exon	Ankef1
chr2	136553677	136553783	CDS	Ankef1
chr2	136553677	136553783	transcript	Ankef1
chr6	147575472	147575581	exon	Ccdc91
chr6	147575472	147575581	CDS	Ccdc91
chr6	147575472	147575581	transcript	Ccdc91
chr7	101722704	101722834	exon	Clpb
chr7	101722704	101722834	CDS	Clpb
chr7	101722704	101722834	transcript	Clpb
chr7	102153796	102154036	exon	Nup98
chr7	102153796	102154036	CDS	Nup98
chr7	102153796	102154036	transcript	Nup98
chr8	46527189	46527288	exon	Acsl1
chr8	46527189	46527288	CDS	Acsl1
chr8	46527189	46527288	transcript	Acsl1
chr9	75395509	75395655	exon	Mapk6
chr9	75395509	75395655	CDS	Mapk6
chr9	75395509	75395655	transcript	Mapk6
chr4	43446841	43447090	transcript	Tesk1
chr4	43446841	43447090	exon	Tesk1
chr4	43446841	43447090	CDS	Tesk1
chr7	127582846	127582986	exon	Phkg2
chr7	127582846	127582986	CDS	Phkg2
chr7	127582846	127582986	transcript	Ccdc189
chr7	127582846	127582986	exon	Ccdc189
chr7	127582846	127582986	3UTR	Ccdc189
chr7	127582846	127582986	transcript	Phkg2
chr15	75896647	75896741	exon	Eef1d
chr15	75896647	75896741	CDS	Eef1d
chr15	75896647	75896741	transcript	Eef1d
chr8	111009176	111009216	exon	Ddx19b
chr8	111009176	111009216	CDS	Ddx19b
chr8	111009176	111009216	transcript	Ddx19b
chr9	102596121	102596320	exon	Cep63
chr9	102596121	102596320	CDS	Cep63
chr9	102596121	102596320	transcript	Cep63
chr11	3714544	3714717	exon	Osbp2
chr11	3714544	3714717	CDS	Osbp2
chr11	3714544	3714717	transcript	Osbp2
chr6	135242157	135242222	transcript	Gsg1
chr6	135242157	135242222	exon	Gsg1
chr6	135242157	135242222	CDS	Gsg1
chr8	46511359	46511462	exon	Acsl1
chr8	46511359	46511462	CDS	Acsl1
chr8	46511359	46511462	transcript	Acsl1
chr8	23182706	23182964	exon	Gpat4
chr8	23182706	23182964	CDS	Gpat4
chr8	23182706	23182964	transcript	Gpat4
chr1	153900940	153901122	transcript	Glul
chr2	122803921	122804106	exon	Sqor
chr2	122803921	122804106	CDS	Sqor
chr2	122803921	122804106	transcript	Sqor
chr15	4943639	4943776	exon	Mroh2b
chr15	4943639	4943776	CDS	Mroh2b
chr15	4943639	4943776	transcript	Mroh2b
chr6	29409224	29409337	transcript	Ccdc136
chr6	29409224	29409337	exon	Ccdc136
chr6	29409224	29409337	CDS	Ccdc136
chr3	34058023	34058077	exon	Fxr1
chr3	34058023	34058077	CDS	Fxr1
chr3	34058023	34058077	exon	Dnajc19
chr3	34058023	34058077	CDS	Dnajc19
chr3	34058023	34058077	transcript	Fxr1
chr3	34058023	34058077	transcript	Dnajc19
chrX	9284032	9284111	transcript	H2al1m
chrX	9284032	9284111	exon	H2al1m
chrX	9284032	9284111	CDS	H2al1m
chrX	9284032	9284111	transcript	Xk
chr7	101687285	101687375	exon	Clpb
chr7	101687285	101687375	CDS	Clpb
chr7	101687285	101687375	transcript	Clpb
chr4	154666683	154666787	transcript	Actrt2
chr4	154666683	154666787	exon	Actrt2
chr4	154666683	154666787	CDS	Actrt2
chr8	109525086	109525214	exon	Pmfbp1
chr8	109525086	109525214	CDS	Pmfbp1
chr8	109525086	109525214	transcript	Pmfbp1
chr4	109055019	109055089	exon	Nrd1
chr4	109055019	109055089	CDS	Nrd1
chr4	109055019	109055089	transcript	Nrd1
chr8	46518448	46518501	exon	Acsl1
chr8	46518448	46518501	CDS	Acsl1
chr8	46518448	46518501	transcript	Acsl1
chr2	29912565	29912641	exon	Odf2
chr2	29912565	29912641	CDS	Odf2
chr2	29912565	29912641	transcript	Odf2
chrX	7075708	7075795	exon	Akap4
chrX	7075708	7075795	CDS	Akap4
chrX	7075708	7075795	transcript	Akap4
chr17	40790586	40790665	exon	Crisp2
chr17	40790586	40790665	CDS	Crisp2
chr17	40790586	40790665	5UTR	Crisp2
chr17	40790586	40790665	start_codon	Crisp2
chr17	40790586	40790665	transcript	Crisp2
chr3	107896297	107896375	transcript	Gstm5
chr3	107896297	107896375	exon	Gstm5
chr3	107896297	107896375	CDS	Gstm5
chr1	46356510	46356610	exon	Dnah7b
chr1	46356510	46356610	CDS	Dnah7b
chr1	46356510	46356610	transcript	Dnah7b
chr6	103729284	103729397	exon	Chl1
chr6	103729284	103729397	CDS	Chl1
chr6	103729284	103729397	3UTR	Chl1
chr6	103729284	103729397	stop_codon	Chl1
chr6	103729284	103729397	transcript	Chl1
chr6	50596442	50596593	exon	4921507P07Rik
chr6	50596442	50596593	5UTR	4921507P07Rik
chr6	50596442	50596593	transcript	4921507P07Rik
chr18	70474284	70474366	exon	Stard6
chr18	70474284	70474366	5UTR	Stard6
chr18	70474284	70474366	transcript	Stard6
chr11	69939237	69939328	transcript	Ybx2
chr11	69939237	69939328	exon	Ybx2
chr11	69939237	69939328	CDS	Ybx2
chr6	126866278	126866560	exon	Akap3
chr6	126866278	126866560	CDS	Akap3
chr6	126866278	126866560	transcript	Akap3
chr12	78691597	78691793	exon	Fam71d
chr12	78691597	78691793	5UTR	Fam71d
chr12	78691597	78691793	transcript	Fam71d
chr3	19218161	19218321	exon	Mtfr1
chr3	19218161	19218321	CDS	Mtfr1
chr3	19218161	19218321	transcript	Mtfr1
chr12	78699152	78699219	exon	Fam71d
chr12	78699152	78699219	5UTR	Fam71d
chr12	78699152	78699219	transcript	Fam71d
chr19	9113004	9113149	exon	Asrgl1
chr19	9113004	9113149	CDS	Asrgl1
chr19	9113004	9113149	transcript	Asrgl1
chr14	16310366	16310492	exon	Ngly1
chr14	16310366	16310492	CDS	Ngly1
chr14	16310366	16310492	transcript	Ngly1
chr17	35001525	35001720	exon	Vars
chr17	35001525	35001720	CDS	Vars
chr17	35001525	35001720	transcript	Vars
chr17	36158458	36158533	transcript	2410017I17Rik
chr4	122848432	122848536	exon	Ppt1
chr4	122848432	122848536	CDS	Ppt1
chr4	122848432	122848536	transcript	Ppt1
chr12	78715352	78715408	exon	Fam71d
chr12	78715352	78715408	CDS	Fam71d
chr12	78715352	78715408	transcript	Fam71d
chr14	101199287	101199456	transcript	Prr30
chr14	101199287	101199456	exon	Prr30
chr14	101199287	101199456	5UTR	Prr30
chr4	95996758	95996822	exon	Hook1
chr4	95996758	95996822	CDS	Hook1
chr4	95996758	95996822	transcript	Hook1
chr8	111010720	111010747	exon	Ddx19b
chr8	111010720	111010747	CDS	Ddx19b
chr8	111010720	111010747	transcript	Ddx19b
chr9	75388913	75389077	exon	Mapk6
chr9	75388913	75389077	CDS	Mapk6
chr9	75388913	75389077	transcript	Mapk6
chr7	30729811	30729957	exon	Gapdhs
chr7	30729811	30729957	3UTR	Gapdhs
chr7	30729811	30729957	CDS	Gapdhs
chr7	30729811	30729957	stop_codon	Gapdhs
chr7	30729811	30729957	transcript	Gapdhs
chr17	35015437	35015477	exon	Vars
chr17	35015437	35015477	CDS	Vars
chr17	35015437	35015477	transcript	Vars
chr18	46524559	46524806	exon	Fem1c
chr18	46524559	46524806	CDS	Fem1c
chr18	46524559	46524806	5UTR	Fem1c
chr18	46524559	46524806	start_codon	Fem1c
chr18	46524559	46524806	transcript	Fem1c
chr2	152311841	152311987	exon	Tbc1d20
chr2	152311841	152311987	CDS	Tbc1d20
chr2	152311841	152311987	3UTR	Tbc1d20
chr2	152311841	152311987	stop_codon	Tbc1d20
chr2	152311841	152311987	transcript	Tbc1d20
chr4	132922357	132922500	exon	Fam76a
chr4	132922357	132922500	CDS	Fam76a
chr4	132922357	132922500	5UTR	Fam76a
chr4	132922357	132922500	start_codon	Fam76a
chr4	132922357	132922500	transcript	Fam76a
chr2	57355759	57355920	exon	Gpd2
chr2	57355759	57355920	CDS	Gpd2
chr2	57355759	57355920	transcript	Gpd2
chr8	23179456	23179501	exon	Gpat4
chr8	23179456	23179501	CDS	Gpat4
chr8	23179456	23179501	transcript	Gpat4
chr17	53724013	53724086	exon	4932415M13Rik
chr17	53724013	53724086	transcript	4932415M13Rik
chr2	75981216	75981319	transcript	Ttc30a1
chr2	75981216	75981319	exon	Ttc30a1
chr2	75981216	75981319	CDS	Ttc30a1
chr14	46084160	46084173	transcript	Ubb-ps
chr14	46084160	46084173	exon	Ubb-ps
chr1	172279667	172279695	exon	Atp1a2
chr1	172279667	172279695	CDS	Atp1a2
chr1	172279667	172279695	transcript	Atp1a2
chr19	60580488	60580650	exon	Cacul1
chr19	60580488	60580650	CDS	Cacul1
chr19	60580488	60580650	transcript	Cacul1
chr2	122785063	122785195	exon	Sqor
chr2	122785063	122785195	CDS	Sqor
chr2	122785063	122785195	transcript	Sqor
chr6	85667869	85667957	exon	Alms1
chr6	85667869	85667957	CDS	Alms1
chr6	85667869	85667957	transcript	Alms1
chr6	103708457	103708538	exon	Chl1
chr6	103708457	103708538	CDS	Chl1
chr6	103708457	103708538	transcript	Chl1
chr7	46877732	46877936	exon	Ldhc
chr7	46877732	46877936	CDS	Ldhc
chr7	46877732	46877936	3UTR	Ldhc
chr7	46877732	46877936	stop_codon	Ldhc
chr7	46877732	46877936	transcript	Ldhc
chr14	120936421	120936488	exon	Ipo5
chr14	120936421	120936488	CDS	Ipo5
chr14	120936421	120936488	transcript	Ipo5
chr16	64768976	64769163	transcript	4930453N24Rik
chr16	64768976	64769163	exon	4930453N24Rik
chr16	64768976	64769163	CDS	4930453N24Rik
chr4	146167536	146167603	transcript	Zfp600
chr5	117283344	117283466	transcript	Pebp1
chr5	117283344	117283466	exon	Pebp1
chr5	117283344	117283466	CDS	Pebp1
chr1	80304152	80304195	exon	Cul3
chr1	80304152	80304195	CDS	Cul3
chr1	80304152	80304195	transcript	Cul3
chr17	35010837	35010920	exon	Vars
chr17	35010837	35010920	CDS	Vars
chr17	35010837	35010920	transcript	Vars
chr3	96851620	96851741	exon	Pdzk1
chr3	96851620	96851741	CDS	Pdzk1
chr3	96851620	96851741	transcript	Pdzk1
chr6	28427895	28428060	transcript	Fscn3
chr6	28427895	28428060	exon	Fscn3
chr6	28427895	28428060	5UTR	Fscn3
chr6	28427895	28428060	CDS	Fscn3
chr6	28427895	28428060	start_codon	Fscn3
chr7	29701150	29701194	exon	Catsperg2
chr7	29701150	29701194	CDS	Catsperg2
chr7	29701150	29701194	transcript	Catsperg2
chr8	40795902	40795969	transcript	Adam20
chr8	40795902	40795969	exon	Adam20
chr8	40795902	40795969	CDS	Adam20
chr2	151401839	151401977	transcript	LOC100125594
chr6	103701805	103701877	exon	Chl1
chr6	103701805	103701877	CDS	Chl1
chr6	103701805	103701877	transcript	Chl1
chr16	64766275	64766522	transcript	4930453N24Rik
chr16	64766275	64766522	exon	4930453N24Rik
chr16	64766275	64766522	3UTR	4930453N24Rik
chr16	64766275	64766522	CDS	4930453N24Rik
chr16	64766275	64766522	stop_codon	4930453N24Rik
chr1	130449418	130449515	exon	Cd55
chr1	130449418	130449515	CDS	Cd55
chr1	130449418	130449515	transcript	Cd55
chr12	55139477	55139552	exon	Fam177a2
chr12	55139477	55139552	3UTR	Fam177a2
chr12	55139477	55139552	exon	Fam177a
chr12	55139477	55139552	3UTR	Fam177a
chr12	55139477	55139552	transcript	Fam177a2
chr12	55139477	55139552	transcript	Fam177a
chr12	10374722	10374962	exon	Nt5c1b
chr12	10374722	10374962	CDS	Nt5c1b
chr12	10374722	10374962	transcript	Nt5c1b
chr19	7528941	7529070	exon	Atl3
chr19	7528941	7529070	CDS	Atl3
chr19	7528941	7529070	transcript	Atl3
chr3	34046983	34047060	exon	Fxr1
chr3	34046983	34047060	CDS	Fxr1
chr3	34046983	34047060	transcript	Fxr1
chr4	109000840	109001108	exon	Nrd1
chr4	109000840	109001108	CDS	Nrd1
chr4	109000840	109001108	transcript	Nrd1
chr8	40755244	40755342	transcript	Adam25
chr8	40755244	40755342	exon	Adam25
chr8	40755244	40755342	CDS	Adam25
chr12	55135667	55135697	exon	Fam177a2
chr12	55135667	55135697	CDS	Fam177a2
chr12	55135667	55135697	exon	Fam177a
chr12	55135667	55135697	CDS	Fam177a
chr12	55135667	55135697	transcript	Fam177a2
chr12	55135667	55135697	transcript	Fam177a
chr12	78710269	78710338	exon	Fam71d
chr12	78710269	78710338	5UTR	Fam71d
chr12	78710269	78710338	CDS	Fam71d
chr12	78710269	78710338	start_codon	Fam71d
chr12	78710269	78710338	transcript	Fam71d
chr19	7532403	7532448	exon	Atl3
chr19	7532403	7532448	CDS	Atl3
chr19	7532403	7532448	transcript	Atl3
chr6	147590386	147590480	exon	Ccdc91
chr6	147590386	147590480	CDS	Ccdc91
chr6	147590386	147590480	transcript	Ccdc91
chr17	35012929	35013032	exon	Vars
chr17	35012929	35013032	CDS	Vars
chr17	35012929	35013032	transcript	Vars
chr2	156943992	156944057	exon	Ndrg3
chr2	156943992	156944057	CDS	Ndrg3
chr2	156943992	156944057	transcript	Ndrg3
chr6	140002077	140002218	exon	Plcz1
chr6	140002077	140002218	CDS	Plcz1
chr6	140002077	140002218	transcript	Plcz1
chr15	76177149	76177239	exon	Plec
chr15	76177149	76177239	CDS	Plec
chr15	76177149	76177239	transcript	Plec
chr17	35171413	35171564	transcript	Aif1
chr17	35171413	35171564	exon	Aif1
chr17	35171413	35171564	CDS	Aif1
chr2	151411263	151411381	transcript	LOC100125594
chr5	117285720	117285822	transcript	Pebp1
chr5	117285720	117285822	exon	Pebp1
chr5	117285720	117285822	CDS	Pebp1
chr5	117286134	117286245	transcript	Pebp1
chr5	117286134	117286245	exon	Pebp1
chr5	117286134	117286245	CDS	Pebp1
chrX	7073633	7073737	exon	Akap4
chrX	7073633	7073737	CDS	Akap4
chrX	7073633	7073737	transcript	Akap4
chr1	46253503	46253539	exon	Dnah7b
chr1	46253503	46253539	CDS	Dnah7b
chr1	46253503	46253539	transcript	Dnah7b
chr13	64162174	64162335	exon	Habp4
chr13	64162174	64162335	CDS	Habp4
chr13	64162174	64162335	transcript	Habp4
chr17	35013642	35013750	exon	Vars
chr17	35013642	35013750	CDS	Vars
chr17	35013642	35013750	transcript	Vars
chr18	21010676	21010793	exon	Rnf138
chr18	21010676	21010793	CDS	Rnf138
chr18	21010676	21010793	transcript	Rnf138
chr18	42153016	42153161	exon	Sh3rf2
chr18	42153016	42153161	CDS	Sh3rf2
chr18	42153016	42153161	transcript	Sh3rf2
chr4	44129481	44129644	exon	Rnf38
chr4	44129481	44129644	3UTR	Rnf38
chr4	44129481	44129644	CDS	Rnf38
chr4	44129481	44129644	stop_codon	Rnf38
chr4	44129481	44129644	transcript	Rnf38
chr6	134423802	134424063	exon	Bcl2l14
chr6	134423802	134424063	CDS	Bcl2l14
chr6	134423802	134424063	transcript	Bcl2l14
chr8	46505648	46505718	exon	Acsl1
chr8	46505648	46505718	CDS	Acsl1
chr8	46505648	46505718	transcript	Acsl1
chr10	80639590	80639645	transcript	Csnk1g2
chr10	80639590	80639645	exon	Csnk1g2
chr10	80639590	80639645	CDS	Csnk1g2
chr10	80519755	80519912	exon	Atp8b3
chr10	80519755	80519912	3UTR	Atp8b3
chr10	80519755	80519912	CDS	Atp8b3
chr10	80519755	80519912	stop_codon	Atp8b3
chr10	80519755	80519912	transcript	Atp8b3
chr17	30192562	30192694	exon	Zfand3
chr17	30192562	30192694	CDS	Zfand3
chr17	30192562	30192694	transcript	Zfand3
chr4	33049688	33049909	exon	Ube2j1
chr4	33049688	33049909	CDS	Ube2j1
chr4	33049688	33049909	transcript	Ube2j1
chr17	35146245	35146332	exon	Bag6
chr17	35146245	35146332	CDS	Bag6
chr17	35146245	35146332	transcript	Bag6
chr3	64001538	64001612	exon	Gmps
chr3	64001538	64001612	CDS	Gmps
chr3	64001538	64001612	transcript	Gmps
chr9	75393364	75393530	exon	Mapk6
chr9	75393364	75393530	CDS	Mapk6
chr9	75393364	75393530	transcript	Mapk6
chr12	10372831	10372976	exon	Nt5c1b
chr12	10372831	10372976	CDS	Nt5c1b
chr12	10372831	10372976	transcript	Nt5c1b
chr13	64274602	64274742	exon	Cdc14b
chr13	64274602	64274742	CDS	Cdc14b
chr13	64274602	64274742	transcript	Cdc14b
chr14	27459115	27459214	transcript	Tasor
chr3	116322081	116322213	exon	Cdc14a
chr3	116322081	116322213	CDS	Cdc14a
chr3	116322081	116322213	5UTR	Cdc14a
chr3	116322081	116322213	start_codon	Cdc14a
chr3	116322081	116322213	transcript	Cdc14a
chr5	72914633	72914842	exon	Slain2
chr5	72914633	72914842	CDS	Slain2
chr5	72914633	72914842	transcript	Slain2
chr7	28407230	28407290	exon	Samd4b
chr7	28407230	28407290	CDS	Samd4b
chr7	28407230	28407290	transcript	Samd4b
chr3	107895911	107895999	transcript	Gstm5
chr3	107895911	107895999	exon	Gstm5
chr3	107895911	107895999	5UTR	Gstm5
chr3	107895911	107895999	CDS	Gstm5
chr3	107895911	107895999	start_codon	Gstm5
chr3	107895911	107895999	transcript	4933431E20Rik
chr3	107895911	107895999	exon	4933431E20Rik
chr14	122118409	122118493	transcript	Tm9sf2
chr9	103359875	103359991	transcript	Cdv3
chr9	103359875	103359991	exon	Cdv3
chr9	103359875	103359991	CDS	Cdv3
chr4	43666133	43666234	exon	Fam221b
chr4	43666133	43666234	CDS	Fam221b
chr4	43666133	43666234	transcript	Fam221b
chr2	122260179	122260356	exon	Sord
chr2	122260179	122260356	CDS	Sord
chr2	122260179	122260356	transcript	Sord
chr6	29411709	29411869	exon	Ccdc136
chr6	29411709	29411869	CDS	Ccdc136
chr6	29411709	29411869	transcript	Ccdc136
chr12	59040384	59040491	.
chr14	30595703	30595945	exon	Prkcd
chr14	30595703	30595945	3UTR	Prkcd
chr14	30595703	30595945	CDS	Prkcd
chr14	30595703	30595945	stop_codon	Prkcd
chr14	30595703	30595945	transcript	Prkcd
chr8	40796492	40796689	transcript	Adam20
chr8	40796492	40796689	exon	Adam20
chr8	40796492	40796689	CDS	Adam20
chrX	91289476	91289543	.
chr12	111542679	111542827	exon	Eif5
chr12	111542679	111542827	CDS	Eif5
chr12	111542679	111542827	transcript	Eif5
chr18	52663566	52663673	exon	1700034E13Rik
chr18	52663566	52663673	CDS	1700034E13Rik
chr18	52663566	52663673	transcript	1700034E13Rik
chr7	105862690	105862739	.
chr1	46343757	46343841	exon	Dnah7b
chr1	46343757	46343841	CDS	Dnah7b
chr1	46343757	46343841	transcript	Dnah7b
chr12	98658212	98658350	exon	Spata7
chr12	98658212	98658350	CDS	Spata7
chr12	98658212	98658350	transcript	Spata7
chr9	44091834	44091901	exon	Usp2
chr9	44091834	44091901	CDS	Usp2
chr9	44091834	44091901	transcript	Usp2
chr1	46352812	46352888	exon	Dnah7b
chr1	46352812	46352888	CDS	Dnah7b
chr1	46352812	46352888	transcript	Dnah7b
chr18	70483411	70483539	exon	Stard6
chr18	70483411	70483539	CDS	Stard6
chr18	70483411	70483539	transcript	Stard6
chr13	97022228	97022524	exon	1700029F12Rik
chr13	97022228	97022524	3UTR	1700029F12Rik
chr13	97022228	97022524	CDS	1700029F12Rik
chr13	97022228	97022524	stop_codon	1700029F12Rik
chr13	97022228	97022524	transcript	1700029F12Rik
chr1	46321375	46321442	transcript	Dnah7b
chr14	16310858	16310890	exon	Ngly1
chr14	16310858	16310890	CDS	Ngly1
chr14	16310858	16310890	transcript	Ngly1
chr14	69363589	69363654	exon	Entpd4b
chr14	69363589	69363654	CDS	Entpd4b
chr14	69363589	69363654	exon	Entpd4
chr14	69363589	69363654	CDS	Entpd4
chr14	69363589	69363654	transcript	Entpd4b
chr14	69363589	69363654	transcript	Entpd4
chr14	63146491	63146643	exon	Fdft1
chr14	63146491	63146643	3UTR	Fdft1
chr14	63146491	63146643	transcript	Fdft1
chr17	65824709	65824790	exon	Ppp4r1
chr17	65824709	65824790	CDS	Ppp4r1
chr17	65824709	65824790	transcript	Ppp4r1
chr2	120748433	120748560	exon	Ttbk2
chr2	120748433	120748560	CDS	Ttbk2
chr2	120748433	120748560	transcript	Ttbk2
chr9	103356376	103356440	transcript	Cdv3
chr9	103356376	103356440	exon	Cdv3
chr9	103356376	103356440	CDS	Cdv3
chrX	7078327	7078557	exon	Akap4
chrX	7078327	7078557	CDS	Akap4
chrX	7078327	7078557	3UTR	Akap4
chrX	7078327	7078557	stop_codon	Akap4
chrX	7078327	7078557	transcript	Akap4
chr4	137455152	137455223	transcript	1700013G24Rik
chr4	137455152	137455223	exon	1700013G24Rik
chr4	137455152	137455223	CDS	1700013G24Rik
chr15	75896819	75896893	exon	Eef1d
chr15	75896819	75896893	CDS	Eef1d
chr15	75896819	75896893	transcript	Eef1d
chr13	64170013	64170103	exon	Habp4
chr13	64170013	64170103	CDS	Habp4
chr13	64170013	64170103	transcript	Habp4
chr14	30604106	30604211	exon	Prkcd
chr14	30604106	30604211	CDS	Prkcd
chr14	30604106	30604211	transcript	Prkcd
chr15	83365035	83365178	exon	1700001L05Rik
chr15	83365035	83365178	transcript	1700001L05Rik
chr4	136540355	136540520	exon	Luzp1
chr4	136540355	136540520	5UTR	Luzp1
chr4	136540355	136540520	CDS	Luzp1
chr4	136540355	136540520	start_codon	Luzp1
chr4	136540355	136540520	transcript	Luzp1
chr7	28406603	28406688	exon	Samd4b
chr7	28406603	28406688	CDS	Samd4b
chr7	28406603	28406688	transcript	Samd4b
chr12	111543099	111543250	exon	Eif5
chr12	111543099	111543250	CDS	Eif5
chr12	111543099	111543250	transcript	Eif5
chr6	103708707	103708799	exon	Chl1
chr6	103708707	103708799	CDS	Chl1
chr6	103708707	103708799	transcript	Chl1
chr3	92588828	92588982	exon	Smcp
chr3	92588828	92588982	5UTR	Smcp
chr3	92588828	92588982	transcript	Smcp
chr18	25158274	25158324	exon	Tpgs2
chr18	25158274	25158324	CDS	Tpgs2
chr18	25158274	25158324	5UTR	Tpgs2
chr18	25158274	25158324	transcript	Tpgs2
chr4	122853590	122853648	exon	Ppt1
chr4	122853590	122853648	CDS	Ppt1
chr4	122853590	122853648	transcript	Ppt1
chr2	122234808	122234960	exon	Sord
chr2	122234808	122234960	5UTR	Sord
chr2	122234808	122234960	CDS	Sord
chr2	122234808	122234960	start_codon	Sord
chr2	122234808	122234960	transcript	Sord
chr1	72255034	72255106	transcript	D230017M19Rik
chr1	72255106	72255187	transcript	D230017M19Rik
chr19	7516877	7516984	exon	Atl3
chr19	7516877	7516984	CDS	Atl3
chr19	7516877	7516984	transcript	Atl3
chr1	46213348	46213521	exon	Dnah7b
chr1	46213348	46213521	CDS	Dnah7b
chr1	46213348	46213521	transcript	Dnah7b
chr11	94480415	94480607	transcript	Spata20
chr11	94480415	94480607	exon	Spata20
chr11	94480415	94480607	CDS	Spata20
chr18	21017818	21017876	exon	Rnf138
chr18	21017818	21017876	CDS	Rnf138
chr18	21017818	21017876	transcript	Rnf138
chr4	111768715	111768841	exon	Spata6
chr4	111768715	111768841	CDS	Spata6
chr4	111768715	111768841	transcript	Spata6
chr7	45207594	45207876	transcript	Dkkl1
chr7	45207594	45207876	exon	Dkkl1
chr7	45207594	45207876	CDS	Dkkl1
chr1	73015764	73015864	transcript	Tnp1
chr1	73015764	73015864	exon	Tnp1
chr1	73015764	73015864	CDS	Tnp1
chr1	73015764	73015864	5UTR	Tnp1
chr1	73015764	73015864	start_codon	Tnp1
chr7	101786645	101786751	exon	Clpb
chr7	101786645	101786751	CDS	Clpb
chr7	101786645	101786751	transcript	Clpb
chr1	46242183	46242314	exon	Dnah7b
chr1	46242183	46242314	CDS	Dnah7b
chr1	46242183	46242314	transcript	Dnah7b
chr6	29410073	29410243	exon	Ccdc136
chr6	29410073	29410243	CDS	Ccdc136
chr6	29410073	29410243	transcript	Ccdc136
chrX	7070430	7070527	exon	Akap4
chrX	7070430	7070527	CDS	Akap4
chrX	7070430	7070527	start_codon	Akap4
chrX	7070430	7070527	transcript	Akap4
chr15	63818302	63818351	transcript	1700065I16Rik
chr15	63818302	63818351	exon	1700065I16Rik
chr17	35171113	35171194	transcript	Aif1
chr17	35171113	35171194	exon	Aif1
chr17	35171113	35171194	CDS	Aif1
chr17	40791865	40791909	exon	Crisp2
chr17	40791865	40791909	5UTR	Crisp2
chr17	40791865	40791909	transcript	Crisp2
chr15	82002540	82002610	exon	Desi1
chr15	82002540	82002610	CDS	Desi1
chr15	82002540	82002610	transcript	Desi1
chr7	101786328	101786407	exon	Clpb
chr7	101786328	101786407	CDS	Clpb
chr7	101786328	101786407	transcript	Clpb
chr7	44500149	44500440	exon	Fam71e1
chr7	44500149	44500440	CDS	Fam71e1
chr7	44500149	44500440	start_codon	Fam71e1
chr7	44500149	44500440	transcript	Fam71e1
chr9	106543683	106543781	exon	Iqcf3
chr9	106543683	106543781	3UTR	Iqcf3
chr9	106543683	106543781	transcript	Iqcf3
chr9	106543683	106543781	CDS	Iqcf3
chr7	125369360	125369556	CDS	4930571K23Rik
chr7	125369360	125369556	stop_codon	4930571K23Rik
chr7	125369360	125369556	transcript	4930571K23Rik
chr7	125369360	125369556	exon	4930571K23Rik
chr7	125369360	125369556	3UTR	4930571K23Rik
chr11	88851349	88851489	exon	Akap1
chr11	88851349	88851489	5UTR	Akap1
chr11	88851349	88851489	transcript	Akap1
chr2	122807572	122807641	exon	Sqor
chr2	122807572	122807641	CDS	Sqor
chr2	122807572	122807641	transcript	Sqor
chr2	151473253	151473288	transcript	4921509C19Rik
chr2	151473253	151473288	exon	4921509C19Rik
chr2	151473253	151473288	CDS	4921509C19Rik
chr10	95563794	95563965	exon	Nudt4
chr10	95563794	95563965	5UTR	Nudt4
chr10	95563794	95563965	transcript	Nudt4
chr13	62035969	62036033	.
chr17	65829372	65829487	exon	Ppp4r1
chr17	65829372	65829487	CDS	Ppp4r1
chr17	65829372	65829487	transcript	Ppp4r1
chr4	123861145	123861198	.
chr10	80542564	80542717	exon	Rexo1
chr10	80542564	80542717	CDS	Rexo1
chr10	80542564	80542717	transcript	Rexo1
chr17	35012783	35012821	exon	Vars
chr17	35012783	35012821	CDS	Vars
chr17	35012783	35012821	transcript	Vars
chr17	24110918	24111063	exon	Pdpk1
chr17	24110918	24111063	CDS	Pdpk1
chr17	24110918	24111063	5UTR	Pdpk1
chr17	24110918	24111063	start_codon	Pdpk1
chr17	24110918	24111063	transcript	Pdpk1
chr18	35660791	35660858	transcript	Spata24
chr18	35660791	35660858	exon	Spata24
chr18	35660791	35660858	CDS	Spata24
chr2	130406721	130406859	transcript	Tmem239
chr2	130406721	130406859	exon	Tmem239
chr2	130406721	130406859	5UTR	Tmem239
chr2	130406721	130406859	CDS	Tmem239
chr2	130406721	130406859	start_codon	Tmem239
chr3	103756623	103756751	exon	Hipk1
chr3	103756623	103756751	transcript	Hipk1
chr17	35140316	35140481	exon	Bag6
chr17	35140316	35140481	CDS	Bag6
chr17	35140316	35140481	transcript	Bag6
chr12	10380797	10380922	exon	Nt5c1b
chr12	10380797	10380922	CDS	Nt5c1b
chr12	10380797	10380922	transcript	Nt5c1b
chr2	29901075	29901242	exon	Odf2
chr2	29901075	29901242	CDS	Odf2
chr2	29901075	29901242	transcript	Odf2
chr5	129908706	129908857	transcript	Nupr1l
chr5	129908706	129908857	exon	Nupr1l
chr5	129908706	129908857	CDS	Nupr1l
chr8	46533564	46533637	exon	Acsl1
chr8	46533564	46533637	CDS	Acsl1
chr8	46533564	46533637	transcript	Acsl1
chr9	96364113	96364265	exon	Atp1b3
chr9	96364113	96364265	CDS	Atp1b3
chr9	96364113	96364265	5UTR	Atp1b3
chr9	96364113	96364265	start_codon	Atp1b3
chr9	96364113	96364265	transcript	Atp1b3
chr1	46233478	46233521	exon	Dnah7b
chr1	46233478	46233521	CDS	Dnah7b
chr1	46233478	46233521	transcript	Dnah7b
chr10	80053635	80053716	transcript	Gpx4
chr10	80053635	80053716	exon	Gpx4
chr10	80053635	80053716	CDS	Gpx4
chr10	80053635	80053716	5UTR	Gpx4
chr10	80053635	80053716	start_codon	Gpx4
chr10	80053635	80053716	transcript	Bc1
chr17	35146036	35146170	exon	Bag6
chr17	35146036	35146170	CDS	Bag6
chr17	35146036	35146170	transcript	Bag6
chr5	105485802	105485880	exon	Lrrc8b
chr5	105485802	105485880	CDS	Lrrc8b
chr5	105485802	105485880	transcript	Lrrc8b
chr14	120935126	120935248	exon	Ipo5
chr14	120935126	120935248	CDS	Ipo5
chr14	120935126	120935248	transcript	Ipo5
chr10	80639770	80639859	transcript	Csnk1g2
chr10	80639770	80639859	exon	Csnk1g2
chr10	80639770	80639859	CDS	Csnk1g2
chr11	3711957	3712054	exon	Osbp2
chr11	3711957	3712054	CDS	Osbp2
chr11	3711957	3712054	transcript	Osbp2
chr9	96343330	96343376	exon	Atp1b3
chr9	96343330	96343376	CDS	Atp1b3
chr9	96343330	96343376	transcript	Atp1b3
chr7	126975513	126975680	transcript	Cdiptos
chr7	126975513	126975680	exon	Cdiptos
chr1	172244910	172245033	exon	Atp1a4
chr1	172244910	172245033	CDS	Atp1a4
[truncated: 930 more rows]
