# Supplementary material for: Targeted mRNP-phagy licenses translational activation during cellular metamorphosis
Source: Research Square preprint supplement (doi:10.21203/rs.3.rs-6289188/v1), 2025-05-06
Supplement: Supplementary file 7 [file 939156a34e37b679a33e6645.xlsx]

## Sheet: deltaTE
ensembl_gene_id	baseMean	log2FoldChange	lfcSE	stat	pvalue	padj	external_gene_name	description
ENSMUSG00000000001	28.7827	1.59175	0.631322	2.52129	0.0116924	0.144167	Gnai3	G protein subunit alpha i3 [Source:MGI Symbol;Acc:MGI:95773]
ENSMUSG00000000003	0	NA	NA	NA	NA	NA	Pbsn	probasin [Source:MGI Symbol;Acc:MGI:1860484]
ENSMUSG00000000028	10.9866	-0.160827	1.8525	-0.0868166	0.930817	NA	Cdc45	cell division cycle 45 [Source:MGI Symbol;Acc:MGI:1338073]
ENSMUSG00000000037	6.71415	1.50055	2.33825	0.641742	0.521041	NA	Scml2	Scm polycomb group protein like 2 [Source:MGI Symbol;Acc:MGI:1340042]
ENSMUSG00000000049	58.9005	0.0941025	0.670985	0.140245	0.888466	0.999653	Apoh	apolipoprotein H [Source:MGI Symbol;Acc:MGI:88058]
ENSMUSG00000000056	9.95034	1.83352	1.52511	1.20222	0.229277	NA	Narf	nuclear prelamin A recognition factor [Source:MGI Symbol;Acc:MGI:1914858]
ENSMUSG00000000058	0.393747	0.583494	6.14796	0.0949087	0.924387	NA	Cav2	caveolin 2 [Source:MGI Symbol;Acc:MGI:107571]
ENSMUSG00000000078	4.64448	-0.544731	1.70701	-0.319114	0.74964	NA	Klf6	Kruppel-like transcription factor 6 [Source:MGI Symbol;Acc:MGI:1346318]
ENSMUSG00000000085	23.5547	-0.466331	1.77913	-0.262112	0.793235	0.999653	Scmh1	sex comb on midleg homolog 1 [Source:MGI Symbol;Acc:MGI:1352762]
ENSMUSG00000000088	25.5103	-0.758317	1.77263	-0.427793	0.668802	0.999653	Cox5a	cytochrome c oxidase subunit 5A [Source:MGI Symbol;Acc:MGI:88474]
ENSMUSG00000000093	4.161	-0.0295475	2.1775	-0.0135695	0.989173	NA	Tbx2	T-box 2 [Source:MGI Symbol;Acc:MGI:98494]
ENSMUSG00000000094	0	NA	NA	NA	NA	NA	Tbx4	T-box 4 [Source:MGI Symbol;Acc:MGI:102556]
ENSMUSG00000000103	3.14989	-1.70407	2.61118	-0.652604	0.514011	NA	Zfy2	zinc finger protein 2, Y-linked [Source:MGI Symbol;Acc:MGI:99213]
ENSMUSG00000000120	24.3451	2.60146	1.12277	2.31699	0.0205041	0.215537	Ngfr	nerve growth factor receptor (TNFR superfamily, member 16) [Source:MGI Symbol;Acc:MGI:97323]
ENSMUSG00000000125	334.582	-2.05316	0.48437	-4.23882	2.25e-05	0.000733458	Wnt3	wingless-type MMTV integration site family, member 3 [Source:MGI Symbol;Acc:MGI:98955]
ENSMUSG00000000126	0	NA	NA	NA	NA	NA	Wnt9a	wingless-type MMTV integration site family, member 9A [Source:MGI Symbol;Acc:MGI:2446084]
ENSMUSG00000000127	39.1032	-0.922728	1.72404	-0.535212	0.592503	0.999653	Fer	FER tyrosine kinase [Source:MGI Symbol;Acc:MGI:105917]
ENSMUSG00000000131	105.068	-0.601319	1.69252	-0.355281	0.722379	0.999653	Xpo6	exportin 6 [Source:MGI Symbol;Acc:MGI:2429950]
ENSMUSG00000000134	3.81243	0.772851	2.49196	0.310138	0.756456	NA	Tfe3	transcription factor E3 [Source:MGI Symbol;Acc:MGI:98511]
ENSMUSG00000000142	1.35369	3.19077	3.8108	0.837297	0.402426	NA	Axin2	axin 2 [Source:MGI Symbol;Acc:MGI:1270862]
ENSMUSG00000000148	9.08572	0.539544	1.90999	0.282485	0.777572	NA	Brat1	BRCA1-associated ATM activator 1 [Source:MGI Symbol;Acc:MGI:1891679]
ENSMUSG00000000149	44.8577	-0.58568	0.614813	-0.952616	0.340785	0.999653	Gna12	guanine nucleotide binding protein, alpha 12 [Source:MGI Symbol;Acc:MGI:95767]
ENSMUSG00000000154	4.65428	-0.351888	2.3897	-0.147252	0.882933	NA	Slc22a18	solute carrier family 22 (organic cation transporter), member 18 [Source:MGI Symbol;Acc:MGI:1336884]
ENSMUSG00000000157	0	NA	NA	NA	NA	NA	Itgb2l	integrin beta 2-like [Source:MGI Symbol;Acc:MGI:1277979]
ENSMUSG00000000159	0.993999	-0.912099	5.4611	-0.167018	0.867356	NA	Igsf5	immunoglobulin superfamily, member 5 [Source:MGI Symbol;Acc:MGI:1919308]
ENSMUSG00000000167	9.77852	2.25795	2.0065	1.12531	0.260456	NA	Pih1d2	PIH1 domain containing 2 [Source:MGI Symbol;Acc:MGI:1919864]
ENSMUSG00000000168	89.6971	1.5297	0.355857	4.29863	1.72e-05	0.000576138	Dlat	dihydrolipoamide S-acetyltransferase [Source:MGI Symbol;Acc:MGI:2385311]
ENSMUSG00000000171	25.6462	1.04246	0.675131	1.54409	0.122567	0.637864	Sdhd	succinate dehydrogenase complex, subunit D, integral membrane protein [Source:MGI Symbol;Acc:MGI:1914175]
ENSMUSG00000000182	0	NA	NA	NA	NA	NA	Fgf23	fibroblast growth factor 23 [Source:MGI Symbol;Acc:MGI:1891427]
ENSMUSG00000000183	0	NA	NA	NA	NA	NA	Fgf6	fibroblast growth factor 6 [Source:MGI Symbol;Acc:MGI:95520]
ENSMUSG00000000184	4.71083	-0.920768	1.81736	-0.506652	0.612399	NA	Ccnd2	cyclin D2 [Source:MGI Symbol;Acc:MGI:88314]
ENSMUSG00000000194	24.618	0.305835	0.829506	0.368696	0.712355	0.999653	Gpr107	G protein-coupled receptor 107 [Source:MGI Symbol;Acc:MGI:2139054]
ENSMUSG00000000197	2.80122	-1.71665	1.99834	-0.859039	0.390319	NA	Nalcn	sodium leak channel, non-selective [Source:MGI Symbol;Acc:MGI:2444306]
ENSMUSG00000000202	0.216233	1.11289	6.18503	0.179932	0.857206	NA	Btbd17	BTB domain containing 17 [Source:MGI Symbol;Acc:MGI:1919264]
ENSMUSG00000000204	0	NA	NA	NA	NA	NA	Slfn4	schlafen 4 [Source:MGI Symbol;Acc:MGI:1329010]
ENSMUSG00000000214	0.683187	0.939591	5.70566	0.164677	0.869198	NA	Th	tyrosine hydroxylase [Source:MGI Symbol;Acc:MGI:98735]
ENSMUSG00000000215	0	NA	NA	NA	NA	NA	Ins2	insulin II [Source:MGI Symbol;Acc:MGI:96573]
ENSMUSG00000000216	0	NA	NA	NA	NA	NA	Scnn1g	sodium channel, nonvoltage-gated 1 gamma [Source:MGI Symbol;Acc:MGI:104695]
ENSMUSG00000000223	1.93583	1.47221	6.0435	0.243603	0.807539	NA	Drp2	dystrophin related protein 2 [Source:MGI Symbol;Acc:MGI:107432]
ENSMUSG00000000244	0	NA	NA	NA	NA	NA	Tspan32	tetraspanin 32 [Source:MGI Symbol;Acc:MGI:1350360]
ENSMUSG00000000247	1.60899	-1.98214	4.01229	-0.494018	0.621294	NA	Lhx2	LIM homeobox protein 2 [Source:MGI Symbol;Acc:MGI:96785]
ENSMUSG00000000248	0	NA	NA	NA	NA	NA	Clec2g	C-type lectin domain family 2, member g [Source:MGI Symbol;Acc:MGI:1918059]
ENSMUSG00000000253	1.30607	1.12026	3.59251	0.311833	0.755168	NA	Gmpr	guanosine monophosphate reductase [Source:MGI Symbol;Acc:MGI:1913605]
ENSMUSG00000000263	0	NA	NA	NA	NA	NA	Glra1	glycine receptor, alpha 1 subunit [Source:MGI Symbol;Acc:MGI:95747]
ENSMUSG00000000266	0.342195	2.45754	6.14353	0.400021	0.689141	NA	Mid2	midline 2 [Source:MGI Symbol;Acc:MGI:1344333]
ENSMUSG00000000275	1.18864	3.53524	4.69023	0.753746	0.451002	NA	Trim25	tripartite motif-containing 25 [Source:MGI Symbol;Acc:MGI:102749]
ENSMUSG00000000276	1.64329	0.129849	3.01077	0.0431282	0.965599	NA	Dgke	diacylglycerol kinase, epsilon [Source:MGI Symbol;Acc:MGI:1889276]
ENSMUSG00000000278	18.9242	1.74058	0.752678	2.31251	0.0207496	0.216648	Scpep1	serine carboxypeptidase 1 [Source:MGI Symbol;Acc:MGI:1921867]
ENSMUSG00000000282	37.7847	-0.604108	0.452713	-1.33442	0.182067	0.784887	Mnt	max binding protein [Source:MGI Symbol;Acc:MGI:109150]
ENSMUSG00000000290	0.734025	2.78843	5.49583	0.507372	0.611894	NA	Itgb2	integrin beta 2 [Source:MGI Symbol;Acc:MGI:96611]
ENSMUSG00000000295	1.36298	-0.373918	3.81913	-0.0979066	0.922006	NA	Hddc2	HD domain containing 2 [Source:MGI Symbol;Acc:MGI:1916942]
ENSMUSG00000000296	3.75483	0.378905	2.43268	0.155756	0.876225	NA	Tpd52l1	tumor protein D52-like 1 [Source:MGI Symbol;Acc:MGI:1298386]
ENSMUSG00000000301	6.05415	0.559854	2.21702	0.252525	0.800635	NA	Pemt	phosphatidylethanolamine N-methyltransferase [Source:MGI Symbol;Acc:MGI:104535]
ENSMUSG00000000303	0.491568	1.61563	6.14031	0.263119	0.792459	NA	Cdh1	cadherin 1 [Source:MGI Symbol;Acc:MGI:88354]
ENSMUSG00000000305	0.753349	-0.11021	5.67794	-0.0194102	0.984514	NA	Cdh4	cadherin 4 [Source:MGI Symbol;Acc:MGI:99218]
ENSMUSG00000000308	0	NA	NA	NA	NA	NA	Ckmt1	creatine kinase, mitochondrial 1, ubiquitous [Source:MGI Symbol;Acc:MGI:99441]
ENSMUSG00000000317	1.74284	-1.3883	3.40178	-0.408111	0.683193	NA	Bcl6b	B cell CLL/lymphoma 6, member B [Source:MGI Symbol;Acc:MGI:1278332]
ENSMUSG00000000318	0.319501	-3.35271	6.19963	-0.540791	0.588652	NA	Clec10a	C-type lectin domain family 10, member A [Source:MGI Symbol;Acc:MGI:96975]
ENSMUSG00000000320	19.212	0.998475	0.849502	1.17536	0.239849	0.892347	Alox12	arachidonate 12-lipoxygenase [Source:MGI Symbol;Acc:MGI:87998]
ENSMUSG00000000326	2.13203	0.0680878	2.65641	0.0256315	0.979551	NA	Comt	catechol-O-methyltransferase [Source:MGI Symbol;Acc:MGI:88470]
ENSMUSG00000000339	47.3602	-0.664647	0.784684	-0.847026	0.396981	0.999653	Rtca	RNA 3'-terminal phosphate cyclase [Source:MGI Symbol;Acc:MGI:1913618]
ENSMUSG00000000340	3.83374	2.29331	1.67513	1.36903	0.170989	NA	Dbt	dihydrolipoamide branched chain transacylase E2 [Source:MGI Symbol;Acc:MGI:105386]
ENSMUSG00000000346	35.2501	-0.042963	0.450979	-0.095266	0.924104	0.999653	Dazap2	DAZ associated protein 2 [Source:MGI Symbol;Acc:MGI:1344344]
ENSMUSG00000000355	0.559127	-4.05356	6.17098	-0.656874	0.511262	NA	Mcts1	malignant T cell amplified sequence 1 [Source:MGI Symbol;Acc:MGI:1916245]
ENSMUSG00000000359	0.153375	-2.26911	6.23278	-0.364061	0.715813	NA	Rem1	rad and gem related GTP binding protein 1 [Source:MGI Symbol;Acc:MGI:1097696]
ENSMUSG00000000365	93.5149	0.261618	0.491638	0.532135	0.594632	0.999653	Rnf17	ring finger protein 17 [Source:MGI Symbol;Acc:MGI:1353419]
ENSMUSG00000000374	23.0576	-0.275028	0.668651	-0.411318	0.680839	0.999653	Trappc10	trafficking protein particle complex 10 [Source:MGI Symbol;Acc:MGI:1336209]
ENSMUSG00000000378	1.42506	-0.810564	4.94382	-0.163955	0.869767	NA	Ccm2	cerebral cavernous malformation 2 [Source:MGI Symbol;Acc:MGI:2384924]
ENSMUSG00000000381	1.03546	-6.46158	6.12127	-1.05559	0.291153	NA	Wap	whey acidic protein [Source:MGI Symbol;Acc:MGI:98943]
ENSMUSG00000000384	19.152	-0.370435	1.81881	-0.203669	0.838612	0.999653	Tbrg4	transforming growth factor beta regulated gene 4 [Source:MGI Symbol;Acc:MGI:1100868]
ENSMUSG00000000385	0.499167	-0.478531	6.19457	-0.0772502	0.938425	NA	Tmprss2	transmembrane protease, serine 2 [Source:MGI Symbol;Acc:MGI:1354381]
ENSMUSG00000000386	0.225987	-2.99213	6.21007	-0.481819	0.629935	NA	Mx1	MX dynamin-like GTPase 1 [Source:MGI Symbol;Acc:MGI:97243]
ENSMUSG00000000392	0	NA	NA	NA	NA	NA	Fap	fibroblast activation protein [Source:MGI Symbol;Acc:MGI:109608]
ENSMUSG00000000394	0	NA	NA	NA	NA	NA	Gcg	glucagon [Source:MGI Symbol;Acc:MGI:95674]
ENSMUSG00000000399	44.0404	0.184387	1.73463	0.106297	0.915347	0.999653	Ndufa9	NADH:ubiquinone oxidoreductase subunit A9 [Source:MGI Symbol;Acc:MGI:1913358]
ENSMUSG00000000402	0	NA	NA	NA	NA	NA	Egfl6	EGF-like-domain, multiple 6 [Source:MGI Symbol;Acc:MGI:1858599]
ENSMUSG00000000409	0.0746271	0.426369	6.21328	0.0686223	0.94529	NA	Lck	lymphocyte protein tyrosine kinase [Source:MGI Symbol;Acc:MGI:96756]
ENSMUSG00000000411	963.999	-0.561491	0.125604	-4.47033	7.81e-06	0.000278375	Tssk3	testis-specific serine kinase 3 [Source:MGI Symbol;Acc:MGI:1929914]
ENSMUSG00000000416	0.613717	10.101	6.11643	1.65146	0.0986453	NA	Cttnbp2	cortactin binding protein 2 [Source:MGI Symbol;Acc:MGI:1353467]
ENSMUSG00000000420	3.66707	4.51846	3.00917	1.50156	0.13321	NA	Galnt1	polypeptide N-acetylgalactosaminyltransferase 1 [Source:MGI Symbol;Acc:MGI:894693]
ENSMUSG00000000435	0	NA	NA	NA	NA	NA	Myf5	myogenic factor 5 [Source:MGI Symbol;Acc:MGI:97252]
ENSMUSG00000000439	194.44	-1.13725	0.344788	-3.29842	0.000972323	0.0198489	Mkrn2	makorin, ring finger protein, 2 [Source:MGI Symbol;Acc:MGI:1914277]
ENSMUSG00000000440	0.153189	-0.556504	6.20817	-0.0896406	0.928573	NA	Pparg	peroxisome proliferator activated receptor gamma [Source:MGI Symbol;Acc:MGI:97747]
ENSMUSG00000000441	8.24655	0.610723	1.92204	0.317748	0.750676	NA	Raf1	v-raf-leukemia viral oncogene 1 [Source:MGI Symbol;Acc:MGI:97847]
ENSMUSG00000000486	0	NA	NA	NA	NA	NA	Septin1	septin 1 [Source:MGI Symbol;Acc:MGI:1858916]
ENSMUSG00000000489	1.61023	-2.58096	3.22008	-0.801519	0.422831	NA	Pdgfb	platelet derived growth factor, B polypeptide [Source:MGI Symbol;Acc:MGI:97528]
ENSMUSG00000000530	0.226531	1.81476	6.15813	0.294693	0.768229	NA	Acvrl1	activin A receptor, type II-like 1 [Source:MGI Symbol;Acc:MGI:1338946]
ENSMUSG00000000531	2.16212	-0.998756	4.07806	-0.24491	0.806526	NA	Tamalin	trafficking regulator and scaffold protein tamalin [Source:MGI Symbol;Acc:MGI:1860303]
ENSMUSG00000000532	15.7907	2.71696	1.01144	2.68623	0.00722629	0.10043	Acvr1b	activin A receptor, type 1B [Source:MGI Symbol;Acc:MGI:1338944]
ENSMUSG00000000538	4.04684	0.508859	2.15136	0.236529	0.813022	NA	Tom1l2	target of myb1-like 2 (chicken) [Source:MGI Symbol;Acc:MGI:2443306]
ENSMUSG00000000544	0.0832766	-2.26911	6.23278	-0.364061	0.715813	NA	Gpa33	glycoprotein A33 transmembrane [Source:MGI Symbol;Acc:MGI:1891703]
ENSMUSG00000000552	42.3301	-0.625535	1.76584	-0.354243	0.723157	0.999653	Zfp385a	zinc finger protein 385A [Source:MGI Symbol;Acc:MGI:1352495]
ENSMUSG00000000555	0.103401	0.790054	6.19443	0.127543	0.898511	NA	Itga5	integrin alpha 5 (fibronectin receptor alpha) [Source:MGI Symbol;Acc:MGI:96604]
ENSMUSG00000000560	0	NA	NA	NA	NA	NA	Gabra2	gamma-aminobutyric acid type A receptor subunit alpha 2 [Source:MGI Symbol;Acc:MGI:95614]
ENSMUSG00000000561	6.15842	-0.443747	2.11887	-0.209426	0.834116	NA	Wdr77	WD repeat domain 77 [Source:MGI Symbol;Acc:MGI:1917715]
ENSMUSG00000000562	3.80644	1.37307	2.29209	0.599045	0.549143	NA	Adora3	adenosine A3 receptor [Source:MGI Symbol;Acc:MGI:104847]
ENSMUSG00000000563	100.938	0.724705	0.352023	2.05869	0.0395243	0.330364	Atp5pb	ATP synthase peripheral stalk-membrane subunit b [Source:MGI Symbol;Acc:MGI:1100495]
ENSMUSG00000000567	10.6934	0.925527	1.19275	0.775958	0.437774	NA	Sox9	SRY (sex determining region Y)-box 9 [Source:MGI Symbol;Acc:MGI:98371]
ENSMUSG00000000568	33.2182	0.0281537	1.74275	0.0161547	0.987111	0.999653	Hnrnpd	heterogeneous nuclear ribonucleoprotein D [Source:MGI Symbol;Acc:MGI:101947]
ENSMUSG00000000579	0	NA	NA	NA	NA	NA	Dynlt1c	dynein light chain Tctex-type 1C [Source:MGI Symbol;Acc:MGI:3807476]
ENSMUSG00000000581	3.44999	-1.03848	2.85056	-0.364309	0.715628	NA	C1d	C1D nuclear receptor co-repressor [Source:MGI Symbol;Acc:MGI:1927354]
ENSMUSG00000000594	227.595	0.10405	0.271892	0.38269	0.701949	0.999653	Gm2a	GM2 ganglioside activator protein [Source:MGI Symbol;Acc:MGI:95762]
ENSMUSG00000000600	7.54786	-1.48325	1.94606	-0.76218	0.445953	NA	Krit1	KRIT1, ankyrin repeat containing [Source:MGI Symbol;Acc:MGI:1930618]
ENSMUSG00000000605	11.8541	0.900157	0.933079	0.964717	0.334687	0.999653	Clcn4	chloride channel, voltage-sensitive 4 [Source:MGI Symbol;Acc:MGI:104571]
ENSMUSG00000000606	0	NA	NA	NA	NA	NA	Vmn2r88	vomeronasal 2, receptor 88 [Source:MGI Symbol;Acc:MGI:1316662]
ENSMUSG00000000617	0.712502	-5.36708	6.15464	-0.872038	0.383187	NA	Grm6	glutamate receptor, metabotropic 6 [Source:MGI Symbol;Acc:MGI:1351343]
ENSMUSG00000000627	0.519755	-2.80292	6.17691	-0.453774	0.649992	NA	Sema4f	sema domain, immunoglobulin domain (Ig), TM domain, and short cytoplasmic domain [Source:MGI Symbol;Acc:MGI:1340055]
ENSMUSG00000000628	32.96	0.478197	0.747752	0.639513	0.522489	0.999653	Hk2	hexokinase 2 [Source:MGI Symbol;Acc:MGI:1315197]
ENSMUSG00000000631	30.8286	-0.447381	1.74744	-0.256022	0.797934	0.999653	Myo18a	myosin XVIIIA [Source:MGI Symbol;Acc:MGI:2667185]
ENSMUSG00000000632	2.02768	0.0145299	2.58393	0.00562318	0.995513	NA	Sez6	seizure related gene 6 [Source:MGI Symbol;Acc:MGI:104745]
ENSMUSG00000000673	0	NA	NA	NA	NA	NA	Haao	3-hydroxyanthranilate 3,4-dioxygenase [Source:MGI Symbol;Acc:MGI:1349444]
ENSMUSG00000000682	0.691909	-4.12421	4.72989	-0.871945	0.383238	NA	Cd52	CD52 antigen [Source:MGI Symbol;Acc:MGI:1346088]
ENSMUSG00000000686	0.784957	-0.282854	4.37828	-0.0646041	0.948489	NA	Abhd15	abhydrolase domain containing 15 [Source:MGI Symbol;Acc:MGI:1914727]
ENSMUSG00000000690	0	NA	NA	NA	NA	NA	Hoxb6	homeobox B6 [Source:MGI Symbol;Acc:MGI:96187]
ENSMUSG00000000693	1.51868	1.43307	2.47455	0.579121	0.562507	NA	Loxl3	lysyl oxidase-like 3 [Source:MGI Symbol;Acc:MGI:1337004]
ENSMUSG00000000701	0	NA	NA	NA	NA	NA	Tcl1b5	T cell leukemia/lymphoma 1B, 5 [Source:MGI Symbol;Acc:MGI:1351635]
ENSMUSG00000000706	0.120214	-2.2588	6.23184	-0.362461	0.717008	NA	Btn1a1	butyrophilin, subfamily 1, member A1 [Source:MGI Symbol;Acc:MGI:103118]
ENSMUSG00000000708	10.0761	-1.05649	1.11592	-0.946742	0.34377	NA	Kat2b	K(lysine) acetyltransferase 2B [Source:MGI Symbol;Acc:MGI:1343094]
ENSMUSG00000000711	12.2328	4.53998	1.4784	3.07088	0.0021343	0.0390333	Rab5b	RAB5B, member RAS oncogene family [Source:MGI Symbol;Acc:MGI:105938]
ENSMUSG00000000724	1.06537	-0.222396	4.12631	-0.0538971	0.957017	NA	Cryba1	crystallin, beta A1 [Source:MGI Symbol;Acc:MGI:88518]
ENSMUSG00000000730	0.618508	-3.12215	6.00555	-0.519878	0.603149	NA	Dnmt3l	DNA methyltransferase 3-like [Source:MGI Symbol;Acc:MGI:1859287]
ENSMUSG00000000731	0	NA	NA	NA	NA	NA	Aire	autoimmune regulator [Source:MGI Symbol;Acc:MGI:1338803]
ENSMUSG00000000732	0.0720776	0.11786	6.21694	0.0189579	0.984875	NA	Icosl	icos ligand [Source:MGI Symbol;Acc:MGI:1354701]
ENSMUSG00000000738	61.7339	0.207056	1.70398	0.121513	0.903284	0.999653	Spg7	SPG7, paraplegin matrix AAA peptidase subunit [Source:MGI Symbol;Acc:MGI:2385906]
ENSMUSG00000000739	2.04708	2.45696	2.89022	0.850093	0.395273	NA	Sult5a1	sulfotransferase family 5A, member 1 [Source:MGI Symbol;Acc:MGI:1931463]
ENSMUSG00000000740	7.25058	1.36325	1.36953	0.995417	0.319534	NA	Rpl13	ribosomal protein L13 [Source:MGI Symbol;Acc:MGI:105922]
ENSMUSG00000000743	41.789	-0.247411	0.418807	-0.590751	0.554687	0.999653	Chmp1a	charged multivesicular body protein 1A [Source:MGI Symbol;Acc:MGI:1920159]
ENSMUSG00000000751	60.5969	0.150544	1.72361	0.0873427	0.930399	0.999653	Rpa1	replication protein A1 [Source:MGI Symbol;Acc:MGI:1915525]
ENSMUSG00000000753	1.4058	0.997144	3.73152	0.267222	0.789299	NA	Serpinf1	serine (or cysteine) peptidase inhibitor, clade F, member 1 [Source:MGI Symbol;Acc:MGI:108080]
ENSMUSG00000000759	3.82813	3.63177	2.15509	1.68521	0.0919481	NA	Tubgcp3	tubulin, gamma complex component 3 [Source:MGI Symbol;Acc:MGI:2183752]
ENSMUSG00000000766	0	NA	NA	NA	NA	NA	Oprm1	opioid receptor, mu 1 [Source:MGI Symbol;Acc:MGI:97441]
ENSMUSG00000000776	3.25479	0.315703	2.3712	0.133141	0.894082	NA	Polr3d	polymerase (RNA) III (DNA directed) polypeptide D [Source:MGI Symbol;Acc:MGI:1914315]
ENSMUSG00000000782	7.55621	1.30797	1.69898	0.769854	0.441387	NA	Tcf7	transcription factor 7, T cell specific [Source:MGI Symbol;Acc:MGI:98507]
ENSMUSG00000000787	17.4745	0.494077	0.811603	0.608767	0.542679	0.999653	Ddx3x	DEAD box helicase 3, X-linked [Source:MGI Symbol;Acc:MGI:103064]
ENSMUSG00000000791	0.150658	-2.70315	6.2159	-0.434877	0.663652	NA	Il12rb1	interleukin 12 receptor, beta 1 [Source:MGI Symbol;Acc:MGI:104579]
ENSMUSG00000000792	2.06501	3.154	3.39012	0.930351	0.352189	NA	Slc5a5	solute carrier family 5 (sodium iodide symporter), member 5 [Source:MGI Symbol;Acc:MGI:2149330]
ENSMUSG00000000794	2.80838	-5.45995	2.37824	-2.29579	0.0216878	NA	Kcnn3	potassium intermediate/small conductance calcium-activated channel, subfamily N, member 3 [Source:MGI Symbol;Acc:MGI:2153183]
ENSMUSG00000000804	83.7382	-0.513819	1.69559	-0.303033	0.761864	0.999653	Usp32	ubiquitin specific peptidase 32 [Source:MGI Symbol;Acc:MGI:2144475]
ENSMUSG00000000805	1.2077	3.62025	4.67145	0.774974	0.438355	NA	Car4	carbonic anhydrase 4 [Source:MGI Symbol;Acc:MGI:1096574]
ENSMUSG00000000811	199.254	-0.456819	0.307125	-1.4874	0.136908	0.6755	Txnrd3	thioredoxin reductase 3 [Source:MGI Symbol;Acc:MGI:2386711]
ENSMUSG00000000817	0.153375	-2.26911	6.23278	-0.364061	0.715813	NA	Fasl	Fas ligand [Source:MGI Symbol;Acc:MGI:99255]
ENSMUSG00000000823	40.3147	-0.625515	1.75292	-0.356841	0.721211	0.999653	Zfp512b	zinc finger protein 512B [Source:MGI Symbol;Acc:MGI:2685478]
ENSMUSG00000000826	5.04789	-0.65995	1.44929	-0.45536	0.648851	NA	Dnajc5	DnaJ heat shock protein family (Hsp40) member C5 [Source:MGI Symbol;Acc:MGI:892995]
ENSMUSG00000000827	6.09265	-0.0624592	2.05401	-0.0304084	0.975741	NA	Tpd52l2	tumor protein D52-like 2 [Source:MGI Symbol;Acc:MGI:1913564]
ENSMUSG00000000838	3.94995	0.773386	2.37582	0.325524	0.744785	NA	Fmr1	fragile X messenger ribonucleoprotein 1 [Source:MGI Symbol;Acc:MGI:95564]
ENSMUSG00000000861	3.68938	2.01456	2.42028	0.832367	0.405202	NA	Bcl11a	BCL11 transcription factor A [Source:MGI Symbol;Acc:MGI:106190]
ENSMUSG00000000869	0.717312	0.984605	5.69047	0.173027	0.86263	NA	Il4	interleukin 4 [Source:MGI Symbol;Acc:MGI:96556]
ENSMUSG00000000876	2.1664	1.68366	2.66528	0.631702	0.527582	NA	Pxmp4	peroxisomal membrane protein 4 [Source:MGI Symbol;Acc:MGI:1891701]
ENSMUSG00000000881	4.39989	-0.276592	2.22385	-0.124375	0.901018	NA	Dlg3	discs large MAGUK scaffold protein 3 [Source:MGI Symbol;Acc:MGI:1888986]
ENSMUSG00000000884	4.90116	-0.607007	2.13248	-0.284649	0.775913	NA	Gnb1l	guanine nucleotide binding protein (G protein), beta polypeptide 1-like [Source:MGI Symbol;Acc:MGI:1338057]
ENSMUSG00000000889	0.092193	-0.392748	6.22833	-0.0630583	0.94972	NA	Dbh	dopamine beta hydroxylase [Source:MGI Symbol;Acc:MGI:94864]
ENSMUSG00000000901	0.740976	2.66631	5.58181	0.477679	0.632879	NA	Mmp11	matrix metallopeptidase 11 [Source:MGI Symbol;Acc:MGI:97008]
ENSMUSG00000000902	13.2308	-0.391586	1.83687	-0.213181	0.831186	0.999653	Smarcb1	SWI/SNF related, matrix associated, actin dependent regulator of chromatin, subfamily b, member 1 [Source:MGI Symbol;Acc:MGI:1328366]
ENSMUSG00000000903	0.736952	0.285632	6.13987	0.0465209	0.962895	NA	Vpreb3	V-set pre-B cell surrogate light chain 3 [Source:MGI Symbol;Acc:MGI:98938]
ENSMUSG00000000915	78.6417	-0.219946	0.448001	-0.490949	0.623462	0.999653	Hip1r	huntingtin interacting protein 1 related [Source:MGI Symbol;Acc:MGI:1352504]
ENSMUSG00000000916	2.79634	-1.82581	2.54043	-0.7187	0.472326	NA	Nsun5	NOL1/NOP2/Sun domain family, member 5 [Source:MGI Symbol;Acc:MGI:2140844]
ENSMUSG00000000934	13.7357	-0.411969	0.847263	-0.486235	0.626801	0.999653	Top1mt	DNA topoisomerase 1, mitochondrial [Source:MGI Symbol;Acc:MGI:1920210]
ENSMUSG00000000938	0	NA	NA	NA	NA	NA	Hoxa10	homeobox A10 [Source:MGI Symbol;Acc:MGI:96171]
ENSMUSG00000000942	71.5073	-1.3076	0.387578	-3.37376	0.000741496	0.015642	Hoxa4	homeobox A4 [Source:MGI Symbol;Acc:MGI:96176]
ENSMUSG00000000948	0	NA	NA	NA	NA	NA	Gm38393	predicted gene, 38393 [Source:MGI Symbol;Acc:MGI:5613898]
ENSMUSG00000000957	11.9773	-1.01551	1.47825	-0.686965	0.492105	0.999653	Mmp14	matrix metallopeptidase 14 (membrane-inserted) [Source:MGI Symbol;Acc:MGI:101900]
ENSMUSG00000000958	1.88073	-1.68742	2.98669	-0.564981	0.572087	NA	Slc7a7	solute carrier family 7 (cationic amino acid transporter, y+ system), member 7 [Source:MGI Symbol;Acc:MGI:1337120]
ENSMUSG00000000959	35.6786	0.0641602	0.647689	0.0990602	0.92109	0.999653	Oxa1l	oxidase assembly 1-like [Source:MGI Symbol;Acc:MGI:1916339]
ENSMUSG00000000976	4.41899	1.1163	2.18713	0.510396	0.609774	NA	Heatr6	HEAT repeat containing 6 [Source:MGI Symbol;Acc:MGI:1919790]
ENSMUSG00000000982	0.0626476	0.10105	6.21635	0.0162555	0.987031	NA	Ccl3	C-C motif chemokine ligand 3 [Source:MGI Symbol;Acc:MGI:98260]
ENSMUSG00000000983	0	NA	NA	NA	NA	NA	Wfdc18	WAP four-disulfide core domain 18 [Source:MGI Symbol;Acc:MGI:107506]
ENSMUSG00000001014	0	NA	NA	NA	NA	NA	Icam4	intercellular adhesion molecule 4, Landsteiner-Wiener blood group [Source:MGI Symbol;Acc:MGI:1925619]
ENSMUSG00000001016	64.9513	1.39757	0.417878	3.34444	0.00082448	0.0172169	Ilf2	interleukin enhancer binding factor 2 [Source:MGI Symbol;Acc:MGI:1915031]
ENSMUSG00000001017	13.1725	-0.445889	1.92378	-0.231778	0.816711	0.999653	Chtop	chromatin target of PRMT1 [Source:MGI Symbol;Acc:MGI:1913761]
ENSMUSG00000001018	4.41095	0.528916	2.10489	0.25128	0.801598	NA	Snapin	SNAP-associated protein [Source:MGI Symbol;Acc:MGI:1333745]
ENSMUSG00000001020	0	NA	NA	NA	NA	NA	S100a4	S100 calcium binding protein A4 [Source:MGI Symbol;Acc:MGI:1330282]
ENSMUSG00000001021	0	NA	NA	NA	NA	NA	S100a3	S100 calcium binding protein A3 [Source:MGI Symbol;Acc:MGI:1338849]
ENSMUSG00000001023	0	NA	NA	NA	NA	NA	S100a5	S100 calcium binding protein A5 [Source:MGI Symbol;Acc:MGI:1338915]
ENSMUSG00000001025	0.732327	3.79085	6.12977	0.618433	0.53629	NA	S100a6	S100 calcium binding protein A6 (calcyclin) [Source:MGI Symbol;Acc:MGI:1339467]
ENSMUSG00000001027	4.98933	0.594274	2.00923	0.295772	0.767404	NA	Scn4a	sodium channel, voltage-gated, type IV, alpha [Source:MGI Symbol;Acc:MGI:98250]
ENSMUSG00000001029	0	NA	NA	NA	NA	NA	Icam2	intercellular adhesion molecule 2 [Source:MGI Symbol;Acc:MGI:96394]
ENSMUSG00000001034	2.31657	1.0954	2.69487	0.406478	0.684392	NA	Mapk7	mitogen-activated protein kinase 7 [Source:MGI Symbol;Acc:MGI:1346347]
ENSMUSG00000001036	4.42185	1.05339	2.25482	0.467171	0.640377	NA	Epn2	epsin 2 [Source:MGI Symbol;Acc:MGI:1333766]
ENSMUSG00000001039	26.7622	-1.74785	1.70222	-1.0268	0.304513	0.998205	B9d1	B9 protein domain 1 [Source:MGI Symbol;Acc:MGI:1351471]
ENSMUSG00000001052	75.8092	-0.900101	0.486341	-1.85076	0.0642036	0.442434	Sec24b	SEC24 homolog B, COPII coat complex component [Source:MGI Symbol;Acc:MGI:2139764]
ENSMUSG00000001053	19.8366	-1.0025	0.77613	-1.29167	0.196471	0.814935	N4bp3	NEDD4 binding protein 3 [Source:MGI Symbol;Acc:MGI:2442218]
ENSMUSG00000001054	13.7485	-2.49132	1.71925	-1.44907	0.147317	0.704985	Rmnd5b	required for meiotic nuclear division 5 homolog B [Source:MGI Symbol;Acc:MGI:1913339]
ENSMUSG00000001056	5.16203	-0.659977	2.17871	-0.302921	0.76195	NA	Nhp2	NHP2 ribonucleoprotein [Source:MGI Symbol;Acc:MGI:1098547]
ENSMUSG00000001062	10.5924	-0.671604	2.01727	-0.332928	0.739189	NA	Vps9d1	VPS9 domain containing 1 [Source:MGI Symbol;Acc:MGI:1914143]
ENSMUSG00000001065	1.16371	-1.6636	6.05108	-0.274926	0.783373	NA	Zfp276	zinc finger protein (C2H2 type) 276 [Source:MGI Symbol;Acc:MGI:1888495]
ENSMUSG00000001076	2.32145	-5.83351	2.84667	-2.04924	0.0404388	NA	C1ql4	complement component 1, q subcomponent-like 4 [Source:MGI Symbol;Acc:MGI:3579909]
ENSMUSG00000001082	0.991384	2.87174	5.17133	0.55532	0.578676	NA	Mfsd10	major facilitator superfamily domain containing 10 [Source:MGI Symbol;Acc:MGI:1915544]
ENSMUSG00000001089	345.337	-0.828727	1.67424	-0.494988	0.620609	0.999653	Luzp1	leucine zipper protein 1 [Source:MGI Symbol;Acc:MGI:107629]
ENSMUSG00000001095	1.3101	0.210938	4.26493	0.0494587	0.960554	NA	Slc13a2	solute carrier family 13 (sodium-dependent dicarboxylate transporter), member 2 [Source:MGI Symbol;Acc:MGI:1276558]
ENSMUSG00000001098	10.4805	-0.237823	1.88488	-0.126175	0.899594	NA	Kctd10	potassium channel tetramerisation domain containing 10 [Source:MGI Symbol;Acc:MGI:2141207]
ENSMUSG00000001100	54.478	-0.277885	0.573004	-0.484961	0.627704	0.999653	Poldip2	polymerase (DNA-directed), delta interacting protein 2 [Source:MGI Symbol;Acc:MGI:1915061]
ENSMUSG00000001103	0	NA	NA	NA	NA	NA	Sebox	SEBOX homeobox [Source:MGI Symbol;Acc:MGI:108012]
ENSMUSG00000001105	6.16989	-0.39375	2.21565	-0.177713	0.858949	NA	Ift20	intraflagellar transport 20 [Source:MGI Symbol;Acc:MGI:1915585]
ENSMUSG00000001119	9.41751	3.74764	1.22083	3.06976	0.00214234	NA	Col6a1	collagen, type VI, alpha 1 [Source:MGI Symbol;Acc:MGI:88459]
ENSMUSG00000001120	34.1889	-0.420581	1.7836	-0.235804	0.813585	0.999653	Pcbp3	poly(rC) binding protein 3 [Source:MGI Symbol;Acc:MGI:1890470]
ENSMUSG00000001123	0.411664	0.255492	6.12183	0.0417345	0.96671	NA	Lgals9	lectin, galactose binding, soluble 9 [Source:MGI Symbol;Acc:MGI:109496]
ENSMUSG00000001127	6.07977	1.48176	2.19917	0.673781	0.500451	NA	Araf	Araf proto-oncogene, serine/threonine kinase [Source:MGI Symbol;Acc:MGI:88065]
ENSMUSG00000001128	0.396793	-0.609168	6.19574	-0.0983205	0.921678	NA	Cfp	complement factor properdin [Source:MGI Symbol;Acc:MGI:97545]
ENSMUSG00000001131	0.48422	1.72085	6.13483	0.280504	0.779091	NA	Timp1	tissue inhibitor of metalloproteinase 1 [Source:MGI Symbol;Acc:MGI:98752]
ENSMUSG00000001134	0.439293	-1.93667	6.14612	-0.315105	0.752682	NA	Uxt	ubiquitously expressed prefoldin like chaperone [Source:MGI Symbol;Acc:MGI:1277988]
ENSMUSG00000001138	2.21582	1.14993	3.28035	0.350551	0.725926	NA	Cnnm3	cyclin M3 [Source:MGI Symbol;Acc:MGI:2151055]
ENSMUSG00000001143	5.77952	-1.42728	2.32179	-0.614735	0.53873	NA	Lman2l	lectin, mannose-binding 2-like [Source:MGI Symbol;Acc:MGI:2443010]
ENSMUSG00000001150	35.9023	-0.351572	0.507747	-0.692415	0.488677	0.999653	Mcm3ap	minichromosome maintenance complex component 3 associated protein [Source:MGI Symbol;Acc:MGI:1930089]
ENSMUSG00000001151	202.894	-0.397939	1.67818	-0.237126	0.812559	0.999653	Pcnt	pericentrin (kendrin) [Source:MGI Symbol;Acc:MGI:102722]
ENSMUSG00000001155	0	NA	NA	NA	NA	NA	Ftcd	formiminotransferase cyclodeaminase [Source:MGI Symbol;Acc:MGI:1339962]
ENSMUSG00000001156	51.7963	-0.971788	0.642061	-1.51355	0.130141	0.657317	Mxd1	MAX dimerization protein 1 [Source:MGI Symbol;Acc:MGI:96908]
ENSMUSG00000001157	72.7551	-0.297013	0.460988	-0.644296	0.519384	0.999653	Gmcl1	germ cell-less, spermatogenesis associated 1 [Source:MGI Symbol;Acc:MGI:1345156]
ENSMUSG00000001158	3.09016	-1.04105	2.21168	-0.470706	0.637851	NA	Snrnp27	small nuclear ribonucleoprotein 27 (U4/U6.U5) [Source:MGI Symbol;Acc:MGI:1913868]
ENSMUSG00000001166	0	NA	NA	NA	NA	NA	Oas1c	2'-5' oligoadenylate synthetase 1C [Source:MGI Symbol;Acc:MGI:2149633]
ENSMUSG00000001168	0.092193	-0.392748	6.22833	-0.0630583	0.94972	NA	Oas1h	2'-5' oligoadenylate synthetase 1H [Source:MGI Symbol;Acc:MGI:2180853]
ENSMUSG00000001173	0.144155	0.673632	6.20176	0.108619	0.913504	NA	Ocrl	OCRL, inositol polyphosphate-5-phosphatase [Source:MGI Symbol;Acc:MGI:109589]
ENSMUSG00000001175	176.517	2.70787	1.46104	1.85338	0.0638283	0.440337	Calm1	calmodulin 1 [Source:MGI Symbol;Acc:MGI:88251]
ENSMUSG00000001211	385.61	-0.568887	0.35249	-1.61391	0.106547	0.595598	Agpat3	1-acylglycerol-3-phosphate O-acyltransferase 3 [Source:MGI Symbol;Acc:MGI:1336186]
ENSMUSG00000001225	0.529318	1.34769	6.16995	0.218428	0.827095	NA	Slc26a3	solute carrier family 26, member 3 [Source:MGI Symbol;Acc:MGI:107181]
ENSMUSG00000001227	0	NA	NA	NA	NA	NA	Sema6b	sema domain, transmembrane domain (TM), and cytoplasmic domain, (semaphorin) 6B [Source:MGI Symbol;Acc:MGI:1202889]
ENSMUSG00000001228	35.6792	0.52105	1.7583	0.296337	0.766972	0.999653	Uhrf1	ubiquitin-like, containing PHD and RING finger domains, 1 [Source:MGI Symbol;Acc:MGI:1338889]
ENSMUSG00000001229	1.98257	-0.632624	4.09515	-0.154481	0.87723	NA	Dpp9	dipeptidylpeptidase 9 [Source:MGI Symbol;Acc:MGI:2443967]
ENSMUSG00000001240	0.161334	1.33167	6.17401	0.21569	0.829229	NA	Ramp2	receptor (calcitonin) activity modifying protein 2 [Source:MGI Symbol;Acc:MGI:1859650]
ENSMUSG00000001247	6.10878	1.03578	2.10795	0.491369	0.623165	NA	Lsr	lipolysis stimulated lipoprotein receptor [Source:MGI Symbol;Acc:MGI:1927471]
ENSMUSG00000001248	6.1674	0.798187	2.07491	0.384685	0.700471	NA	Gramd1a	GRAM domain containing 1A [Source:MGI Symbol;Acc:MGI:105490]
ENSMUSG00000001249	0	NA	NA	NA	NA	NA	Hpn	hepsin [Source:MGI Symbol;Acc:MGI:1196620]
ENSMUSG00000001260	0.111833	-2.24828	6.23087	-0.36083	0.718226	NA	Gabrg1	gamma-aminobutyric acid type A receptor subunit gamma 1 [Source:MGI Symbol;Acc:MGI:103156]
ENSMUSG00000001270	0.199041	-0.449854	6.19447	-0.0726219	0.942107	NA	Ckb	creatine kinase, brain [Source:MGI Symbol;Acc:MGI:88407]
ENSMUSG00000001280	26.8709	-0.799348	0.62186	-1.28541	0.198648	0.816985	Sp1	trans-acting transcription factor 1 [Source:MGI Symbol;Acc:MGI:98372]
ENSMUSG00000001281	1.29098	-2.77931	4.0986	-0.67811	0.497702	NA	Itgb7	integrin beta 7 [Source:MGI Symbol;Acc:MGI:96616]
ENSMUSG00000001285	5.0408	0.533982	2.2027	0.242421	0.808454	NA	Myg1	melanocyte proliferating gene 1 [Source:MGI Symbol;Acc:MGI:1929864]
ENSMUSG00000001288	0.224031	-0.241478	6.17487	-0.0391065	0.968805	NA	Rarg	retinoic acid receptor, gamma [Source:MGI Symbol;Acc:MGI:97858]
ENSMUSG00000001289	262.415	0.0738235	1.67956	0.0439541	0.964941	0.999653	Pfdn5	prefoldin 5 [Source:MGI Symbol;Acc:MGI:1928753]
ENSMUSG00000001300	13.7389	1.54454	1.69529	0.911077	0.362255	0.999653	Efnb2	ephrin B2 [Source:MGI Symbol;Acc:MGI:105097]
ENSMUSG00000001305	8.17305	0.240371	2.00513	0.119878	0.904579	NA	Rrp15	ribosomal RNA processing 15 homolog [Source:MGI Symbol;Acc:MGI:1914473]
ENSMUSG00000001313	0.849646	0.756355	4.35914	0.17351	0.86225	NA	Rnd2	Rho family GTPase 2 [Source:MGI Symbol;Acc:MGI:1338755]
ENSMUSG00000001323	5.18254	-0.245301	2.27178	-0.107978	0.914013	NA	Srr	serine racemase [Source:MGI Symbol;Acc:MGI:1351636]
ENSMUSG00000001333	6.85605	0.481248	1.99587	0.241122	0.809461	NA	Sync	syncoilin [Source:MGI Symbol;Acc:MGI:1916078]
ENSMUSG00000001334	13.7348	-0.0618858	1.38149	-0.0447965	0.964269	0.999653	Fndc5	fibronectin type III domain containing 5 [Source:MGI Symbol;Acc:MGI:1917614]
ENSMUSG00000001348	0.385882	2.12043	6.15087	0.344737	0.730292	NA	Acp5	acid phosphatase 5, tartrate resistant [Source:MGI Symbol;Acc:MGI:87883]
ENSMUSG00000001349	3.70609	1.20064	3.19048	0.376318	0.70668	NA	Cnn1	calponin 1 [Source:MGI Symbol;Acc:MGI:104979]
ENSMUSG00000001366	8.41794	1.18468	1.06391	1.11352	0.265486	NA	Fbxo9	f-box protein 9 [Source:MGI Symbol;Acc:MGI:1918788]
ENSMUSG00000001376	3.85878	-0.279408	2.18861	-0.127665	0.898414	NA	Vps50	VPS50 EARP/GARPII complex subunit [Source:MGI Symbol;Acc:MGI:1920538]
ENSMUSG00000001380	18.687	0.554162	0.745804	0.74304	0.457458	0.999653	Hars1	histidyl-tRNA synthetase 1 [Source:MGI Symbol;Acc:MGI:108087]
ENSMUSG00000001383	19.3672	0.484177	0.845382	0.572732	0.566826	0.999653	Zmat2	zinc finger, matrin type 2 [Source:MGI Symbol;Acc:MGI:1913742]
ENSMUSG00000001403	9.18202	-0.507574	0.977018	-0.519514	0.603403	NA	Ube2c	ubiquitin-conjugating enzyme E2C [Source:MGI Symbol;Acc:MGI:1915862]
ENSMUSG00000001415	116.47	-0.0724507	0.281917	-0.256993	0.797184	0.999653	Smg5	SMG5 nonsense mediated mRNA decay factor [Source:MGI Symbol;Acc:MGI:2447364]
ENSMUSG00000001416	156.362	0.13562	1.69641	0.0799455	0.936281	0.999653	Cct3	chaperonin containing TCP1 subunit 3 [Source:MGI Symbol;Acc:MGI:104708]
ENSMUSG00000001418	2.6946	2.04554	3.96476	0.51593	0.605903	NA	Glmp	glycosylated lysosomal membrane protein [Source:MGI Symbol;Acc:MGI:1913318]
ENSMUSG00000001419	8.11011	-0.221789	1.31913	-0.168133	0.866478	NA	Mef2d	myocyte enhancer factor 2D [Source:MGI Symbol;Acc:MGI:99533]
ENSMUSG00000001420	1.64251	-0.621699	3.55172	-0.175042	0.861047	NA	Tmem79	transmembrane protein 79 [Source:MGI Symbol;Acc:MGI:1919163]
ENSMUSG00000001424	11.8021	0.652563	1.01788	0.641097	0.521459	0.999653	Snd1	staphylococcal nuclease and tudor domain containing 1 [Source:MGI Symbol;Acc:MGI:1929266]
ENSMUSG00000001435	14.81	1.20424	1.89251	0.636316	0.52457	0.999653	Col18a1	collagen, type XVIII, alpha 1 [Source:MGI Symbol;Acc:MGI:88451]
ENSMUSG00000001436	0.399377	-3.61346	6.18835	-0.583913	0.559279	NA	Slc19a1	solute carrier family 19 (folate transporter), member 1 [Source:MGI Symbol;Acc:MGI:103182]
ENSMUSG00000001440	210.259	0.35834	0.25434	1.4089	0.158863	0.733644	Kpnb1	karyopherin subunit beta 1 [Source:MGI Symbol;Acc:MGI:107532]
ENSMUSG00000001441	30.2158	-0.0831942	0.683094	-0.12179	0.903065	0.999653	Npepps	aminopeptidase puromycin sensitive [Source:MGI Symbol;Acc:MGI:1101358]
ENSMUSG00000001444	0.691203	0.931579	5.68419	0.16389	0.869818	NA	Tbx21	T-box 21 [Source:MGI Symbol;Acc:MGI:1888984]
ENSMUSG00000001445	33.9548	-0.204399	0.468817	-0.43599	0.662844	0.999653	Mrpl10	mitochondrial ribosomal protein L10 [Source:MGI Symbol;Acc:MGI:1333801]
ENSMUSG00000001467	37.6946	-0.31672	0.659837	-0.479997	0.63123	0.999653	Cyp51	cytochrome P450, family 51 [Source:MGI Symbol;Acc:MGI:106040]
ENSMUSG00000001472	11.4955	-0.525206	1.87544	-0.280044	0.779444	0.999653	Tcf25	transcription factor 25 (basic helix-loop-helix) [Source:MGI Symbol;Acc:MGI:1914105]
ENSMUSG00000001473	49.2574	0.148883	0.489664	0.304051	0.761089	0.999653	Tubb6	tubulin, beta 6 class V [Source:MGI Symbol;Acc:MGI:1915201]
ENSMUSG00000001482	1.5169	0.892949	3.87518	0.230428	0.81776	NA	Def8	differentially expressed in FDCP 8 [Source:MGI Symbol;Acc:MGI:1346331]
ENSMUSG00000001493	3.37914	-0.800032	2.46334	-0.324775	0.745351	NA	Meox1	mesenchyme homeobox 1 [Source:MGI Symbol;Acc:MGI:103220]
ENSMUSG00000001494	4.49526	-0.0228056	2.13016	-0.010706	0.991458	NA	Sost	sclerostin [Source:MGI Symbol;Acc:MGI:1921749]
ENSMUSG00000001496	0	NA	NA	NA	NA	NA	Nkx2-1	NK2 homeobox 1 [Source:MGI Symbol;Acc:MGI:108067]
ENSMUSG00000001497	0.866082	-1.27492	4.66213	-0.273462	0.784498	NA	Pax9	paired box 9 [Source:MGI Symbol;Acc:MGI:97493]
ENSMUSG00000001504	1.71702	-1.71666	2.19281	-0.782859	0.43371	NA	Irx2	Iroquois homeobox 2 [Source:MGI Symbol;Acc:MGI:1197526]
ENSMUSG00000001506	15.2213	4.60326	0.959519	4.79747	1.61e-06	6.39e-05	Col1a1	collagen, type I, alpha 1 [Source:MGI Symbol;Acc:MGI:88467]
ENSMUSG00000001507	0.350958	2.32142	6.14766	0.377611	0.70572	NA	Itga3	integrin alpha 3 [Source:MGI Symbol;Acc:MGI:96602]
ENSMUSG00000001508	2.32584	-1.03902	2.66849	-0.389366	0.697006	NA	Sgca	sarcoglycan, alpha (dystrophin-associated glycoprotein) [Source:MGI Symbol;Acc:MGI:894698]
ENSMUSG00000001510	0	NA	NA	NA	NA	NA	Dlx3	distal-less homeobox 3 [Source:MGI Symbol;Acc:MGI:94903]
ENSMUSG00000001517	190.246	-0.760115	0.219215	-3.46744	0.000525435	0.0116801	Foxm1	forkhead box M1 [Source:MGI Symbol;Acc:MGI:1347487]
ENSMUSG00000001518	2.96215	0.222064	2.59159	0.0856865	0.931716	NA	Itfg2	integrin alpha FG-GAP repeat containing 2 [Source:MGI Symbol;Acc:MGI:1915450]
ENSMUSG00000001520	0.592318	4.54391	6.10684	0.744068	0.456835	NA	Nrip2	nuclear receptor interacting protein 2 [Source:MGI Symbol;Acc:MGI:1891884]
ENSMUSG00000001521	2.62749	2.97798	2.50643	1.18814	0.234779	NA	Tulp3	tubby-like protein 3 [Source:MGI Symbol;Acc:MGI:1329045]
ENSMUSG00000001524	16.1515	0.135672	1.90962	0.0710463	0.943361	0.999653	Gtf2h4	general transcription factor II H, polypeptide 4 [Source:MGI Symbol;Acc:MGI:1338799]
ENSMUSG00000001525	35.0051	0.592368	0.550428	1.0762	0.281839	0.96413	Tubb5	tubulin, beta 5 class I [Source:MGI Symbol;Acc:MGI:107812]
ENSMUSG00000001542	59.5714	0.00686022	0.530574	0.0129298	0.989684	0.999653	Ell2	elongation factor for RNA polymerase II 2 [Source:MGI Symbol;Acc:MGI:2183438]
ENSMUSG00000001552	21.5559	-0.432839	1.82233	-0.23752	0.812254	0.999653	Jup	junction plakoglobin [Source:MGI Symbol;Acc:MGI:96650]
ENSMUSG00000001555	1.80356	-2.93269	2.99242	-0.98004	0.327067	NA	Fkbp10	FK506 binding protein 10 [Source:MGI Symbol;Acc:MGI:104769]
ENSMUSG00000001558	929.04	-0.691076	0.136912	-5.04759	4.47e-07	1.97e-05	Klhl10	kelch-like 10 [Source:MGI Symbol;Acc:MGI:2181067]
ENSMUSG00000001566	0.0626476	0.10105	6.21635	0.0162555	0.987031	NA	Mnx1	motor neuron and pancreas homeobox 1 [Source:MGI Symbol;Acc:MGI:109160]
ENSMUSG00000001569	15.9902	0.92202	1.30251	0.707881	0.479019	0.999653	Nom1	nucleolar protein with MIF4G domain 1 [Source:MGI Symbol;Acc:MGI:1861749]
ENSMUSG00000001576	25.608	1.657	1.0636	1.55791	0.119254	0.629198	Ergic1	endoplasmic reticulum-golgi intermediate compartment 1 [Source:MGI Symbol;Acc:MGI:1914708]
ENSMUSG00000001583	0.967868	3.09069	4.29444	0.719696	0.471712	NA	Tnk1	tyrosine kinase, non-receptor, 1 [Source:MGI Symbol;Acc:MGI:1930958]
ENSMUSG00000001588	2.41915	-2.77346	1.92829	-1.4383	0.15035	NA	Acap1	ArfGAP with coiled-coil, ankyrin repeat and PH domains 1 [Source:MGI Symbol;Acc:MGI:2388270]
ENSMUSG00000001604	0.240428	-2.7387	6.21716	-0.440507	0.65957	NA	Tcea3	transcription elongation factor A (SII), 3 [Source:MGI Symbol;Acc:MGI:1196908]
ENSMUSG00000001622	0.153375	-2.26911	6.23278	-0.364061	0.715813	NA	Csn3	casein kappa [Source:MGI Symbol;Acc:MGI:107461]
ENSMUSG00000001627	5.93747	-0.0403608	1.4143	-0.0285376	0.977233	NA	Ifrd1	interferon-related developmental regulator 1 [Source:MGI Symbol;Acc:MGI:1316717]
ENSMUSG00000001630	1.01388	-0.816407	5.14651	-0.158633	0.873958	NA	Stk38l	serine/threonine kinase 38 like [Source:MGI Symbol;Acc:MGI:1922250]
ENSMUSG00000001632	6.01854	0.159588	2.00531	0.0795828	0.936569	NA	Brpf1	bromodomain and PHD finger containing, 1 [Source:MGI Symbol;Acc:MGI:1926033]
ENSMUSG00000001642	2.44244	-0.358707	2.48832	-0.144156	0.885377	NA	Akr1b1	aldo-keto reductase family 1 member B [Source:MGI Symbol;Acc:MGI:1353494]
ENSMUSG00000001655	1.6494	-4.028	3.54171	-1.1373	0.255412	NA	Hoxc13	homeobox C13 [Source:MGI Symbol;Acc:MGI:99560]
ENSMUSG00000001656	0	NA	NA	NA	NA	NA	Hoxc11	homeobox C11 [Source:MGI Symbol;Acc:MGI:96193]
ENSMUSG00000001657	0.111833	-2.24828	6.23087	-0.36083	0.718226	NA	Hoxc8	homeobox C8 [Source:MGI Symbol;Acc:MGI:96198]
ENSMUSG00000001661	0	NA	NA	NA	NA	NA	Hoxc6	homeobox C6 [Source:MGI Symbol;Acc:MGI:96197]
ENSMUSG00000001663	0.108116	0.410948	6.21079	0.0661668	0.947245	NA	Gstt1	glutathione S-transferase, theta 1 [Source:MGI Symbol;Acc:MGI:107379]
ENSMUSG00000001665	9.03833	1.55898	1.02623	1.51913	0.128729	NA	Gstt3	glutathione S-transferase, theta 3 [Source:MGI Symbol;Acc:MGI:2143526]
ENSMUSG00000001666	6.70469	1.28223	1.95831	0.654764	0.51262	NA	Ddt	D-dopachrome tautomerase [Source:MGI Symbol;Acc:MGI:1298381]
ENSMUSG00000001670	1.99518	2.99931	3.84846	0.779353	0.435772	NA	Tat	tyrosine aminotransferase [Source:MGI Symbol;Acc:MGI:98487]
ENSMUSG00000001672	0	NA	NA	NA	NA	NA	Marveld3	MARVEL (membrane-associating) domain containing 3 [Source:MGI Symbol;Acc:MGI:1920858]
ENSMUSG00000001674	14.2016	-1.07426	1.138	-0.943986	0.345177	0.999653	Ddx18	DEAD box helicase 18 [Source:MGI Symbol;Acc:MGI:1914192]
ENSMUSG00000001687	60.8107	-0.158571	1.15393	-0.137418	0.8907	0.999653	Ubl3	ubiquitin-like 3 [Source:MGI Symbol;Acc:MGI:1344373]
ENSMUSG00000001700	4.35465	-1.14251	2.32939	-0.490476	0.623797	NA	Gramd2b	GRAM domain containing 2B [Source:MGI Symbol;Acc:MGI:1914815]
ENSMUSG00000001707	5.49483	-0.613748	2.0478	-0.29971	0.764398	NA	Eef1e1	eukaryotic translation elongation factor 1 epsilon 1 [Source:MGI Symbol;Acc:MGI:1913393]
ENSMUSG00000001729	8.55903	-2.44132	1.04629	-2.33331	0.0196317	NA	Akt1	thymoma viral proto-oncogene 1 [Source:MGI Symbol;Acc:MGI:87986]
ENSMUSG00000001739	0	NA	NA	NA	NA	NA	Cldn15	claudin 15 [Source:MGI Symbol;Acc:MGI:1913103]
ENSMUSG00000001741	0.290978	0.513577	6.1691	0.0832498	0.933653	NA	Il16	interleukin 16 [Source:MGI Symbol;Acc:MGI:1270855]
ENSMUSG00000001750	0.479031	3.27872	6.13195	0.534694	0.592861	NA	Tcirg1	T cell, immune regulator 1, ATPase, H+ transporting, lysosomal V0 protein A3 [Source:MGI Symbol;Acc:MGI:1350931]
ENSMUSG00000001751	42.8882	0.137844	0.465512	0.296113	0.767144	0.999653	Naglu	alpha-N-acetylglucosaminidase (Sanfilippo disease IIIB) [Source:MGI Symbol;Acc:MGI:1351641]
ENSMUSG00000001755	7.26735	0.773896	2.04552	0.378338	0.70518	NA	Coasy	Coenzyme A synthase [Source:MGI Symbol;Acc:MGI:1918993]
ENSMUSG00000001761	10.536	1.41889	1.68662	0.841262	0.400201	NA	Smo	smoothened, frizzled class receptor [Source:MGI Symbol;Acc:MGI:108075]
ENSMUSG00000001763	0.703061	-1.39095	6.06429	-0.229367	0.818583	NA	Tspan33	tetraspanin 33 [Source:MGI Symbol;Acc:MGI:1919012]
ENSMUSG00000001767	68.6912	0.764455	0.429069	1.78166	0.0748048	0.485433	Crnkl1	crooked neck pre-mRNA splicing factor 1 [Source:MGI Symbol;Acc:MGI:1914127]
ENSMUSG00000001768	2.42617	-0.174365	2.63724	-0.0661162	0.947285	NA	Rin2	Ras and Rab interactor 2 [Source:MGI Symbol;Acc:MGI:1921280]
ENSMUSG00000001773	0.499193	-3.73993	6.15018	-0.608101	0.543121	NA	Folh1	folate hydrolase 1 [Source:MGI Symbol;Acc:MGI:1858193]
ENSMUSG00000001774	6.84249	-1.41322	1.122	-1.25956	0.207829	NA	Chordc1	cysteine and histidine rich domain containing 1 [Source:MGI Symbol;Acc:MGI:1914167]
ENSMUSG00000001783	23.6432	1.36429	0.592269	2.30349	0.0212513	0.218938	Rtcb	RNA 2',3'-cyclic phosphate and 5'-OH ligase [Source:MGI Symbol;Acc:MGI:106379]
ENSMUSG00000001785	18.268	-0.36547	0.758196	-0.482026	0.629788	0.999653	Pwp1	PWP1 homolog, endonuclein [Source:MGI Symbol;Acc:MGI:1914735]
ENSMUSG00000001786	8.38802	-0.487395	1.95061	-0.249868	0.802689	NA	Fbxo7	F-box protein 7 [Source:MGI Symbol;Acc:MGI:1917004]
ENSMUSG00000001794	79.9319	1.21037	1.71209	0.706953	0.479596	0.999653	Capns1	calpain, small subunit 1 [Source:MGI Symbol;Acc:MGI:88266]
ENSMUSG00000001802	0.358707	2.51486	6.14423	0.409304	0.682317	NA	Lrp3	low density lipoprotein receptor-related protein 3 [Source:MGI Symbol;Acc:MGI:3584516]
ENSMUSG00000001804	0.126318	-0.345662	6.23278	-0.0554588	0.955773	NA	Dsg4	desmoglein 4 [Source:MGI Symbol;Acc:MGI:2661061]
ENSMUSG00000001815	0.721868	-1.43317	5.79423	-0.247345	0.804641	NA	Evx2	even-skipped homeobox 2 [Source:MGI Symbol;Acc:MGI:95462]
ENSMUSG00000001819	0	NA	NA	NA	NA	NA	Hoxd13	homeobox D13 [Source:MGI Symbol;Acc:MGI:96205]
ENSMUSG00000001823	0	NA	NA	NA	NA	NA	Hoxd12	homeobox D12 [Source:MGI Symbol;Acc:MGI:96204]
ENSMUSG00000001827	4.52308	0.25744	2.14404	0.120073	0.904425	NA	Folr1	folate receptor alpha [Source:MGI Symbol;Acc:MGI:95568]
ENSMUSG00000001829	752.01	-1.14576	0.71494	-1.6026	0.109024	0.603718	Clpb	ClpB caseinolytic peptidase B [Source:MGI Symbol;Acc:MGI:1100517]
ENSMUSG00000001833	13.2009	0.577669	2.10541	0.274373	0.783798	0.999653	Septin7	septin 7 [Source:MGI Symbol;Acc:MGI:1335094]
ENSMUSG00000001844	28.2502	-2.69234	1.18358	-2.27475	0.0229211	0.232282	Zdhhc4	zinc finger, DHHC domain containing 4 [Source:MGI Symbol;Acc:MGI:1920131]
ENSMUSG00000001847	9.45622	1.55069	1.1154	1.39026	0.16445	NA	Rac1	Rac family small GTPase 1 [Source:MGI Symbol;Acc:MGI:97845]
ENSMUSG00000001855	93.6916	-0.263808	0.33662	-0.783696	0.433219	0.999653	Nup214	nucleoporin 214 [Source:MGI Symbol;Acc:MGI:1095411]
ENSMUSG00000001864	1.21079	-1.95852	3.62928	-0.539642	0.589444	NA	Aif1l	allograft inflammatory factor 1-like [Source:MGI Symbol;Acc:MGI:1919598]
ENSMUSG00000001865	0	NA	NA	NA	NA	NA	Cpa3	carboxypeptidase A3, mast cell [Source:MGI Symbol;Acc:MGI:88479]
ENSMUSG00000001870	10.8018	0.921774	1.90412	0.484094	0.628319	NA	Ltbp1	latent transforming growth factor beta binding protein 1 [Source:MGI Symbol;Acc:MGI:109151]
ENSMUSG00000001891	9.30456	0.101436	1.81334	0.0559385	0.955391	NA	Ugp2	UDP-glucose pyrophosphorylase 2 [Source:MGI Symbol;Acc:MGI:2183447]
ENSMUSG00000001901	1.67061	0.41002	3.18227	0.128845	0.89748	NA	Kcnh6	potassium voltage-gated channel, subfamily H (eag-related), member 6 [Source:MGI Symbol;Acc:MGI:2684139]
ENSMUSG00000001909	60.1388	1.69465	1.57457	1.07626	0.28181	0.96413	Trmt1	tRNA methyltransferase 1 [Source:MGI Symbol;Acc:MGI:1289155]
ENSMUSG00000001910	14.0395	-1.19489	1.32755	-0.900069	0.368084	0.999653	Nacc1	nucleus accumbens associated 1, BEN and BTB (POZ) domain containing [Source:MGI Symbol;Acc:MGI:1914080]
ENSMUSG00000001911	1.62411	0.581461	3.09506	0.187867	0.850981	NA	Nfix	nuclear factor I/X [Source:MGI Symbol;Acc:MGI:97311]
ENSMUSG00000001918	2.36818	-0.810032	2.50743	-0.323053	0.746655	NA	Slc1a5	solute carrier family 1 (neutral amino acid transporter), member 5 [Source:MGI Symbol;Acc:MGI:105305]
ENSMUSG00000001924	143.894	-1.00419	1.63034	-0.615938	0.537936	0.999653	Uba1	ubiquitin-like modifier activating enzyme 1 [Source:MGI Symbol;Acc:MGI:98890]
ENSMUSG00000001930	20.7165	-0.59643	1.84759	-0.322814	0.746836	0.999653	Vwf	Von Willebrand factor [Source:MGI Symbol;Acc:MGI:98941]
ENSMUSG00000001942	6.12016	5.71929	1.77876	3.21532	0.00130301	NA	Siae	sialic acid acetylesterase [Source:MGI Symbol;Acc:MGI:104803]
ENSMUSG00000001943	0	NA	NA	NA	NA	NA	Vsig2	V-set and immunoglobulin domain containing 2 [Source:MGI Symbol;Acc:MGI:1928009]
ENSMUSG00000001946	0.540836	4.73385	6.11938	0.773583	0.439177	NA	Esam	endothelial cell-specific adhesion molecule [Source:MGI Symbol;Acc:MGI:1916774]
ENSMUSG00000001948	804.215	-0.515928	1.67249	-0.30848	0.757717	0.999653	Spa17	sperm autoantigenic protein 17 [Source:MGI Symbol;Acc:MGI:1333778]
ENSMUSG00000001962	2.71683	1.38433	4.09172	0.338324	0.735119	NA	Fam50a	family with sequence similarity 50, member A [Source:MGI Symbol;Acc:MGI:1351626]
ENSMUSG00000001964	5.21078	1.86314	1.74906	1.06522	0.286776	NA	Emd	emerin [Source:MGI Symbol;Acc:MGI:108117]
ENSMUSG00000001983	8.13831	-0.930333	1.3819	-0.673228	0.500802	NA	Taco1	translational activator of mitochondrially encoded cytochrome c oxidase I [Source:MGI Symbol;Acc:MGI:1917457]
ENSMUSG00000001985	0.521302	1.464	6.16561	0.237446	0.812311	NA	Grik3	glutamate receptor, ionotropic, kainate 3 [Source:MGI Symbol;Acc:MGI:95816]
ENSMUSG00000001986	0.134725	1.19453	6.17838	0.19334	0.846693	NA	Gria3	glutamate receptor, ionotropic, AMPA3 (alpha 3) [Source:MGI Symbol;Acc:MGI:95810]
ENSMUSG00000001988	0.181982	-1.79854	6.21145	-0.289552	0.772159	NA	Npas1	neuronal PAS domain protein 1 [Source:MGI Symbol;Acc:MGI:109205]
ENSMUSG00000001995	16.0007	-0.149778	1.80895	-0.0827983	0.934012	0.999653	Sipa1l2	signal-induced proliferation-associated 1 like 2 [Source:MGI Symbol;Acc:MGI:2676970]
ENSMUSG00000001998	5.79367	3.48007	1.47466	2.35992	0.018279	NA	Ap4e1	adaptor-related protein complex AP-4, epsilon 1 [Source:MGI Symbol;Acc:MGI:1336993]
ENSMUSG00000001999	3.01279	0.282164	1.58893	0.17758	0.859052	NA	Blvra	biliverdin reductase A [Source:MGI Symbol;Acc:MGI:88170]
ENSMUSG00000002006	0.153375	-2.26911	6.23278	-0.364061	0.715813	NA	Pdzd4	PDZ domain containing 4 [Source:MGI Symbol;Acc:MGI:2443483]
ENSMUSG00000002007	0	NA	NA	NA	NA	NA	Srpk3	serine/arginine-rich protein specific kinase 3 [Source:MGI Symbol;Acc:MGI:1891338]
ENSMUSG00000002010	7.42999	0.268938	2.03231	0.132331	0.894722	NA	Idh3g	isocitrate dehydrogenase 3 (NAD+), gamma [Source:MGI Symbol;Acc:MGI:1099463]
ENSMUSG00000002012	0	NA	NA	NA	NA	NA	Pnck	pregnancy upregulated non-ubiquitously expressed CaM kinase [Source:MGI Symbol;Acc:MGI:1347357]
ENSMUSG00000002014	2.10902	3.88105	4.1639	0.93207	0.3513	NA	Ssr4	signal sequence receptor, delta [Source:MGI Symbol;Acc:MGI:1099464]
ENSMUSG00000002015	17.6092	0.0305218	0.590063	0.0517263	0.958747	0.999653	Bcap31	B cell receptor associated protein 31 [Source:MGI Symbol;Acc:MGI:1350933]
ENSMUSG00000002017	59.8101	0.19737	1.73354	0.113854	0.909354	0.999653	Fam98a	family with sequence similarity 98, member A [Source:MGI Symbol;Acc:MGI:1919972]
ENSMUSG00000002020	2.57953	0.849461	2.22255	0.382201	0.702312	NA	Ltbp2	latent transforming growth factor beta binding protein 2 [Source:MGI Symbol;Acc:MGI:99502]
ENSMUSG00000002028	2.50392	1.14702	3.17699	0.36104	0.718069	NA	Kmt2a	lysine (K)-specific methyltransferase 2A [Source:MGI Symbol;Acc:MGI:96995]
ENSMUSG00000002031	28.0679	-1.34483	1.75998	-0.764119	0.444796	0.999653	Ift46	intraflagellar transport 46 [Source:MGI Symbol;Acc:MGI:1923818]
ENSMUSG00000002032	0	NA	NA	NA	NA	NA	Tmem25	transmembrane protein 25 [Source:MGI Symbol;Acc:MGI:1918937]
ENSMUSG00000002033	0.613499	-3.45274	6.19379	-0.557451	0.577219	NA	Cd3g	CD3 antigen, gamma polypeptide [Source:MGI Symbol;Acc:MGI:88333]
ENSMUSG00000002043	5.87752	-0.345127	2.18932	-0.157641	0.874739	NA	Trappc6a	trafficking protein particle complex 6A [Source:MGI Symbol;Acc:MGI:1914341]
ENSMUSG00000002052	87.4327	-0.0905312	0.410204	-0.220698	0.825328	0.999653	Supt6	SPT6, histone chaperone and transcription elongation factor [Source:MGI Symbol;Acc:MGI:107726]
ENSMUSG00000002055	150.308	0.101435	0.404588	0.250712	0.802037	0.999653	Spag5	sperm associated antigen 5 [Source:MGI Symbol;Acc:MGI:1927470]
ENSMUSG00000002057	0.534821	-3.23317	6.16595	-0.524358	0.600029	NA	Foxn1	forkhead box N1 [Source:MGI Symbol;Acc:MGI:102949]
ENSMUSG00000002058	18.0179	0.192163	1.83269	0.104853	0.916492	0.999653	Unc119	unc-119 lipid binding chaperone [Source:MGI Symbol;Acc:MGI:1328357]
ENSMUSG00000002059	0.794391	-1.71823	4.77485	-0.359851	0.718959	NA	Rab34	RAB34, member RAS oncogene family [Source:MGI Symbol;Acc:MGI:104606]
ENSMUSG00000002064	12.2141	-0.0320759	1.15898	-0.027676	0.977921	0.999653	Sdf2	stromal cell derived factor 2 [Source:MGI Symbol;Acc:MGI:108019]
ENSMUSG00000002068	9.30296	1.94566	1.42108	1.36914	0.170955	NA	Ccne1	cyclin E1 [Source:MGI Symbol;Acc:MGI:88316]
ENSMUSG00000002076	9.81633	-0.953069	1.87815	-0.50745	0.611839	NA	Hsf2bp	heat shock transcription factor 2 binding protein [Source:MGI Symbol;Acc:MGI:1921627]
ENSMUSG00000002083	2.43565	-0.764932	2.94494	-0.259745	0.795061	NA	Bbc3	BCL2 binding component 3 [Source:MGI Symbol;Acc:MGI:2181667]
ENSMUSG00000002100	0	NA	NA	NA	NA	NA	Mybpc3	myosin binding protein C, cardiac [Source:MGI Symbol;Acc:MGI:102844]
ENSMUSG00000002102	713.906	-0.401217	0.134479	-2.9835	0.00284974	0.0490947	Psmc3	proteasome (prosome, macropain) 26S subunit, ATPase 3 [Source:MGI Symbol;Acc:MGI:1098754]
ENSMUSG00000002103	4.03626	0.849929	2.40812	0.352943	0.724131	NA	Acp2	acid phosphatase 2, lysosomal [Source:MGI Symbol;Acc:MGI:87882]
ENSMUSG00000002104	0.870766	1.50111	5.40209	0.277876	0.781108	NA	Rapsn	receptor-associated protein of the synapse [Source:MGI Symbol;Acc:MGI:99422]
ENSMUSG00000002105	72.2112	-1.45772	0.371364	-3.92531	8.66e-05	0.0023665	Slc39a13	solute carrier family 39 (metal ion transporter), member 13 [Source:MGI Symbol;Acc:MGI:1915677]
ENSMUSG00000002107	4.62674	0.489577	2.17806	0.224777	0.822153	NA	Celf2	CUGBP, Elav-like family member 2 [Source:MGI Symbol;Acc:MGI:1338822]
ENSMUSG00000002108	4.67876	-0.789152	2.4422	-0.323131	0.746596	NA	Nr1h3	nuclear receptor subfamily 1, group H, member 3 [Source:MGI Symbol;Acc:MGI:1352462]
ENSMUSG00000002109	1.86607	0.243329	2.82598	0.0861043	0.931384	NA	Ddb2	damage specific DNA binding protein 2 [Source:MGI Symbol;Acc:MGI:1355314]
ENSMUSG00000002111	0.278386	-3.52183	6.20217	-0.567839	0.570144	NA	Spi1	spleen focus forming virus (SFFV) proviral integration oncogene [Source:MGI Symbol;Acc:MGI:98282]
ENSMUSG00000002129	50.8287	1.0501	0.486379	2.15902	0.0308489	0.28136	Sf3a1	splicing factor 3a, subunit 1 [Source:MGI Symbol;Acc:MGI:1914715]
ENSMUSG00000002147	7.29272	-0.275308	1.16384	-0.236551	0.813005	NA	Stat6	signal transducer and activator of transcription 6 [Source:MGI Symbol;Acc:MGI:103034]
ENSMUSG00000002190	507.373	0.666658	0.273731	2.43545	0.0148734	0.173393	Clgn	calmegin [Source:MGI Symbol;Acc:MGI:107472]
ENSMUSG00000002204	0.216233	1.11289	6.18503	0.179932	0.857206	NA	Napsa	napsin A aspartic peptidase [Source:MGI Symbol;Acc:MGI:109365]
ENSMUSG00000002205	31.1014	-0.868357	1.4445	-0.601147	0.547742	0.999653	Vrk3	vaccinia related kinase 3 [Source:MGI Symbol;Acc:MGI:2182465]
ENSMUSG00000002210	78.9718	-0.180993	1.69922	-0.106515	0.915173	0.999653	Smg9	SMG9 nonsense mediated mRNA decay factor [Source:MGI Symbol;Acc:MGI:1919247]
ENSMUSG00000002221	28.3375	-1.72006	0.627685	-2.74033	0.00613773	0.0889397	Paxip1	PAX interacting (with transcription-activation domain) protein 1 [Source:MGI Symbol;Acc:MGI:1890430]
ENSMUSG00000002222	24.2852	-0.914058	0.899538	-1.01614	0.309562	0.999653	Rmnd5a	required for meiotic nuclear division 5 homolog A [Source:MGI Symbol;Acc:MGI:1915727]
ENSMUSG00000002227	5.70753	-0.744493	2.11153	-0.352585	0.7244	NA	Mov10	Mov10 RISC complex RNA helicase [Source:MGI Symbol;Acc:MGI:97054]
ENSMUSG00000002228	482.806	-0.318946	0.153452	-2.07848	0.0376652	0.321762	Ppm1j	protein phosphatase 1J [Source:MGI Symbol;Acc:MGI:1919137]
ENSMUSG00000002233	0.50042	4.97789	6.1123	0.814405	0.415413	NA	Rhoc	ras homolog family member C [Source:MGI Symbol;Acc:MGI:106028]
ENSMUSG00000002240	41.9924	-0.247389	1.72564	-0.14336	0.886006	0.999653	Prr27	proline rich 27 [Source:MGI Symbol;Acc:MGI:1921029]
ENSMUSG00000002249	1.71972	-1.55434	2.99498	-0.518981	0.603774	NA	Tead3	TEA domain family member 3 [Source:MGI Symbol;Acc:MGI:109241]
ENSMUSG00000002250	0.880991	-0.510377	4.41648	-0.115562	0.908	NA	Ppard	peroxisome proliferator activator receptor delta [Source:MGI Symbol;Acc:MGI:101884]
ENSMUSG00000002257	1.90392	3.41579	3.04391	1.12217	0.261789	NA	Def6	differentially expressed in FDCP 6 [Source:MGI Symbol;Acc:MGI:1346328]
ENSMUSG00000002265	3.34158	0.800294	2.43802	0.328255	0.742719	NA	Peg3	paternally expressed 3 [Source:MGI Symbol;Acc:MGI:104748]
ENSMUSG00000002266	0	NA	NA	NA	NA	NA	Zim1	zinc finger, imprinted 1 [Source:MGI Symbol;Acc:MGI:1341879]
ENSMUSG00000002274	3.51809	-1.19126	2.3854	-0.499397	0.6175	NA	Metrn	meteorin, glial cell differentiation regulator [Source:MGI Symbol;Acc:MGI:1917333]
ENSMUSG00000002279	47.8876	0.0680066	1.72814	0.0393524	0.968609	0.999653	Lmf1	lipase maturation factor 1 [Source:MGI Symbol;Acc:MGI:1923733]
ENSMUSG00000002280	47.3236	-0.0727106	0.532792	-0.136471	0.891449	0.999653	Ciao3	cytosolic iron-sulfur assembly component 3 [Source:MGI Symbol;Acc:MGI:1914813]
ENSMUSG00000002289	0.563393	2.17718	6.07293	0.358506	0.719965	NA	Angptl4	angiopoietin-like 4 [Source:MGI Symbol;Acc:MGI:1888999]
ENSMUSG00000002297	17.9419	-0.255113	1.79519	-0.14211	0.886993	0.999653	Dbf4	DBF4 zinc finger [Source:MGI Symbol;Acc:MGI:1351328]
ENSMUSG00000002307	42.0659	-0.499821	1.73388	-0.288268	0.773142	0.999653	Daxx	Fas death domain-associated protein [Source:MGI Symbol;Acc:MGI:1197015]
ENSMUSG00000002308	56.3959	1.75447	1.71423	1.02347	0.306084	0.999653	Cd320	CD320 antigen [Source:MGI Symbol;Acc:MGI:1860083]
ENSMUSG00000002319	498.698	-0.205063	1.67302	-0.12257	0.902447	0.999653	Ipo4	importin 4 [Source:MGI Symbol;Acc:MGI:1923001]
ENSMUSG00000002320	2.06718	0.292236	2.59214	0.112739	0.910237	NA	Tm9sf1	transmembrane 9 superfamily member 1 [Source:MGI Symbol;Acc:MGI:1921390]
ENSMUSG00000002324	95.7963	0.565659	0.399179	1.41706	0.156466	0.73073	Rec8	REC8 meiotic recombination protein [Source:MGI Symbol;Acc:MGI:1929645]
ENSMUSG00000002325	0	NA	NA	NA	NA	NA	Irf9	interferon regulatory factor 9 [Source:MGI Symbol;Acc:MGI:107587]
ENSMUSG00000002326	79.2933	-0.917094	0.837698	-1.09478	0.273613	0.950672	Gmpr2	guanosine monophosphate reductase 2 [Source:MGI Symbol;Acc:MGI:1917903]
ENSMUSG00000002329	0.959911	-0.844978	5.53671	-0.152614	0.878703	NA	Mdp1	magnesium-dependent phosphatase 1 [Source:MGI Symbol;Acc:MGI:1915131]
ENSMUSG00000002332	67.9086	0.600115	1.70544	0.351884	0.724926	0.999653	Dhrs1	dehydrogenase/reductase 1 [Source:MGI Symbol;Acc:MGI:1196314]
ENSMUSG00000002341	96.9928	-0.301943	0.597184	-0.505612	0.613129	0.999653	Ncan	neurocan [Source:MGI Symbol;Acc:MGI:104694]
ENSMUSG00000002342	2.6658	-1.49188	2.80736	-0.531415	0.595131	NA	Tmem161a	transmembrane protein 161A [Source:MGI Symbol;Acc:MGI:2384577]
ENSMUSG00000002343	1.0924	-0.0334933	5.47365	-0.006119	0.995118	NA	Armc6	armadillo repeat containing 6 [Source:MGI Symbol;Acc:MGI:1924063]
ENSMUSG00000002345	12.2256	-0.562071	1.2621	-0.445348	0.656068	0.999653	Borcs8	BLOC-1 related complex subunit 8 [Source:MGI Symbol;Acc:MGI:1919618]
ENSMUSG00000002346	0.310708	8.87258	6.1344	1.44636	0.148075	NA	Slc25a42	solute carrier family 25, member 42 [Source:MGI Symbol;Acc:MGI:1920345]
ENSMUSG00000002365	8.78967	0.637112	0.960117	0.663577	0.506961	NA	Snx9	sorting nexin 9 [Source:MGI Symbol;Acc:MGI:1913866]
ENSMUSG00000002372	29.5234	-0.25751	1.75457	-0.146765	0.883318	0.999653	Ranbp3	RAN binding protein 3 [Source:MGI Symbol;Acc:MGI:1919060]
ENSMUSG00000002379	8.84135	0.633689	1.90422	0.332781	0.7393	NA	Ndufa11	NADH:ubiquinone oxidoreductase subunit A11 [Source:MGI Symbol;Acc:MGI:1917125]
ENSMUSG00000002384	12.394	0.717158	1.72812	0.414993	0.678147	0.999653	Bmp8b	bone morphogenetic protein 8b [Source:MGI Symbol;Acc:MGI:107335]
ENSMUSG00000002393	0.826454	-3.37906	6.12266	-0.551894	0.581021	NA	Nr2f6	nuclear receptor subfamily 2, group F, member 6 [Source:MGI Symbol;Acc:MGI:1352453]
ENSMUSG00000002395	52.297	0.153435	1.70754	0.089857	0.928401	0.999653	Use1	unconventional SNARE in the ER 1 homolog (S. cerevisiae) [Source:MGI Symbol;Acc:MGI:1914273]
ENSMUSG00000002396	17.2033	1.76838	1.60881	1.09918	0.271687	0.946632	Ocel1	occludin/ELL domain containing 1 [Source:MGI Symbol;Acc:MGI:1924340]
ENSMUSG00000002409	431.407	-1.33477	1.67605	-0.796377	0.425813	0.999653	Dyrk1b	dual-specificity tyrosine phosphorylation regulated kinase 1b [Source:MGI Symbol;Acc:MGI:1330302]
ENSMUSG00000002413	49.2327	-0.0305996	0.50381	-0.0607365	0.951569	0.999653	Braf	Braf transforming gene [Source:MGI Symbol;Acc:MGI:88190]
ENSMUSG00000002416	10.3272	-0.385845	1.99821	-0.193095	0.846885	NA	Ndufb2	NADH:ubiquinone oxidoreductase subunit B2 [Source:MGI Symbol;Acc:MGI:1915448]
ENSMUSG00000002428	1.85063	-1.02916	3.05992	-0.336337	0.736617	NA	Hltf	helicase-like transcription factor [Source:MGI Symbol;Acc:MGI:1196437]
ENSMUSG00000002455	32.0907	-1.93825	1.68741	-1.14866	0.250698	0.909789	Prpf6	pre-mRNA splicing factor 6 [Source:MGI Symbol;Acc:MGI:1922946]
ENSMUSG00000002458	1.74979	2.69739	3.83011	0.70426	0.481271	NA	Rgs19	regulator of G-protein signaling 19 [Source:MGI Symbol;Acc:MGI:1915153]
ENSMUSG00000002459	0	NA	NA	NA	NA	NA	Rgs20	regulator of G-protein signaling 20 [Source:MGI Symbol;Acc:MGI:1929866]
ENSMUSG00000002475	1.65524	0.541865	4.75757	0.113895	0.909321	NA	Abhd3	abhydrolase domain containing 3 [Source:MGI Symbol;Acc:MGI:2147183]
ENSMUSG00000002477	5.84749	-0.18919	2.08158	-0.0908874	0.927582	NA	Snrpd1	small nuclear ribonucleoprotein D1 [Source:MGI Symbol;Acc:MGI:98344]
ENSMUSG00000002486	33.6446	-0.21613	1.76635	-0.12236	0.902614	0.999653	Tchp	trichoplein, keratin filament binding [Source:MGI Symbol;Acc:MGI:1925082]
ENSMUSG00000002489	15.7738	0.660683	1.80413	0.366207	0.714211	0.999653	Tiam1	T cell lymphoma invasion and metastasis 1 [Source:MGI Symbol;Acc:MGI:103306]
ENSMUSG00000002496	37.3991	-0.836312	1.74691	-0.478739	0.632124	0.999653	Tsc2	TSC complex subunit 2 [Source:MGI Symbol;Acc:MGI:102548]
ENSMUSG00000002500	0.0626476	0.10105	6.21635	0.0162555	0.987031	NA	Rpl3l	ribosomal protein L3-like [Source:MGI Symbol;Acc:MGI:1913461]
ENSMUSG00000002504	0	NA	NA	NA	NA	NA	Nherf2	NHERF family PDZ scaffold protein 2 [Source:MGI Symbol;Acc:MGI:1890662]
ENSMUSG00000002524	53.1392	0.159522	1.73755	0.0918086	0.92685	0.999653	Puf60	poly-U binding splicing factor 60 [Source:MGI Symbol;Acc:MGI:1915209]
ENSMUSG00000002546	30.3122	0.316053	1.78805	0.176758	0.859698	0.999653	Golga2	golgin A2 [Source:MGI Symbol;Acc:MGI:2139395]
ENSMUSG00000002550	1.23432	-5.12571	3.75061	-1.36663	0.17174	NA	Uck1	uridine-cytidine kinase 1 [Source:MGI Symbol;Acc:MGI:98904]
ENSMUSG00000002565	0.626743	3.08296	6.14475	0.501722	0.615863	NA	Scin	scinderin [Source:MGI Symbol;Acc:MGI:1306794]
ENSMUSG00000002578	0.184699	-1.30735	6.23278	-0.209755	0.833859	NA	Ikzf4	IKAROS family zinc finger 4 [Source:MGI Symbol;Acc:MGI:1343139]
ENSMUSG00000002580	11.6778	-0.224963	1.00998	-0.222739	0.823738	0.999653	Mien1	migration and invasion enhancer 1 [Source:MGI Symbol;Acc:MGI:1913678]
ENSMUSG00000002588	0.184386	0.0711467	6.21527	0.0114471	0.990867	NA	Pon1	paraoxonase 1 [Source:MGI Symbol;Acc:MGI:103295]
ENSMUSG00000002602	14.3206	-0.577211	1.58988	-0.363054	0.716565	0.999653	Axl	AXL receptor tyrosine kinase [Source:MGI Symbol;Acc:MGI:1347244]
ENSMUSG00000002603	6.79426	3.43916	1.46559	2.34661	0.0189452	NA	Tgfb1	transforming growth factor, beta 1 [Source:MGI Symbol;Acc:MGI:98725]
ENSMUSG00000002608	38.5035	0.305918	0.529477	0.577773	0.563417	0.999653	Ccdc97	coiled-coil domain containing 97 [Source:MGI Symbol;Acc:MGI:1196455]
ENSMUSG00000002617	0	NA	NA	NA	NA	NA	Zfp40	zinc finger protein 40 [Source:MGI Symbol;Acc:MGI:99185]
ENSMUSG00000002625	21.3767	0.117621	1.77569	0.0662393	0.947187	0.999653	Akap8l	A kinase anchor protein 8-like [Source:MGI Symbol;Acc:MGI:1860606]
ENSMUSG00000002633	0.189414	-1.34618	6.21882	-0.216468	0.828623	NA	Shh	sonic hedgehog [Source:MGI Symbol;Acc:MGI:98297]
ENSMUSG00000002635	20.8321	-0.10906	1.57961	-0.0690425	0.944956	0.999653	Pdcd2l	programmed cell death 2-like [Source:MGI Symbol;Acc:MGI:1915329]
ENSMUSG00000002658	256.926	-0.674508	0.193346	-3.48859	0.000485566	0.0109019	Gtf2f1	general transcription factor IIF, polypeptide 1 [Source:MGI Symbol;Acc:MGI:1923848]
ENSMUSG00000002660	5.97856	1.39646	1.96795	0.709604	0.47795	NA	Clpp	caseinolytic mitochondrial matrix peptidase proteolytic subunit [Source:MGI Symbol;Acc:MGI:1858213]
ENSMUSG00000002661	6.0557	0.959708	2.04605	0.469055	0.63903	NA	Alkbh7	alkB homolog 7 [Source:MGI Symbol;Acc:MGI:1913650]
ENSMUSG00000002664	1.00646	-0.254097	4.08034	-0.0622734	0.950345	NA	Pspn	persephin [Source:MGI Symbol;Acc:MGI:1201684]
ENSMUSG00000002668	0	NA	NA	NA	NA	NA	Dennd1c	DENN domain containing 1C [Source:MGI Symbol;Acc:MGI:1918035]
ENSMUSG00000002679	4.41588	0.0438033	2.27838	0.0192257	0.984661	NA	Med6	mediator complex subunit 6 [Source:MGI Symbol;Acc:MGI:1917042]
ENSMUSG00000002688	15.6599	0.291371	1.48706	0.195938	0.844659	0.999653	Prkd1	protein kinase D1 [Source:MGI Symbol;Acc:MGI:99879]
ENSMUSG00000002699	21.1829	-1.59521	1.78727	-0.892538	0.372104	0.999653	Lcp2	lymphocyte cytosolic protein 2 [Source:MGI Symbol;Acc:MGI:1321402]
ENSMUSG00000002718	55.5233	-1.11471	1.7403	-0.640523	0.521833	0.999653	Cse1l	chromosome segregation 1 like [Source:MGI Symbol;Acc:MGI:1339951]
ENSMUSG00000002728	0.727702	-0.828108	4.73485	-0.174896	0.861161	NA	Naa20	N(alpha)-acetyltransferase 20, NatB catalytic subunit [Source:MGI Symbol;Acc:MGI:1915127]
ENSMUSG00000002731	12.4926	-1.57405	1.10668	-1.42232	0.154935	0.727407	Prkra	protein kinase, interferon inducible double stranded RNA dependent activator [Source:MGI Symbol;Acc:MGI:1344375]
ENSMUSG00000002732	3.60836	-0.372302	1.80278	-0.206516	0.836388	NA	Fkbp7	FK506 binding protein 7 [Source:MGI Symbol;Acc:MGI:1336879]
ENSMUSG00000002733	85.0276	-1.54862	0.434066	-3.56771	0.000360116	0.00836495	Plekha3	pleckstrin homology domain-containing, family A (phosphoinositide binding specific) member 3 [Source:MGI Symbol;Acc:MGI:1932515]
ENSMUSG00000002741	22.5016	1.21654	0.775297	1.56913	0.116617	0.623949	Ykt6	YKT6 v-SNARE homolog (S. cerevisiae) [Source:MGI Symbol;Acc:MGI:1927550]
ENSMUSG00000002748	24.2932	0.54725	0.630172	0.868413	0.385168	0.999653	Baz1b	bromodomain adjacent to zinc finger domain, 1B [Source:MGI Symbol;Acc:MGI:1353499]
ENSMUSG00000002763	73.5373	-0.603389	1.70167	-0.354587	0.722899	0.999653	Pex6	peroxisomal biogenesis factor 6 [Source:MGI Symbol;Acc:MGI:2385054]
ENSMUSG00000002767	9.07855	-0.824951	1.99728	-0.413037	0.67958	NA	Mrpl2	mitochondrial ribosomal protein L2 [Source:MGI Symbol;Acc:MGI:1351622]
ENSMUSG00000002768	1339.27	0.699749	1.68258	0.415878	0.6775	0.999653	Mea1	male enhanced antigen 1 [Source:MGI Symbol;Acc:MGI:96957]
ENSMUSG00000002769	0.301058	2.37815	6.14472	0.387024	0.698739	NA	Gnmt	glycine N-methyltransferase [Source:MGI Symbol;Acc:MGI:1202304]
ENSMUSG00000002771	27.0953	-0.486179	0.693521	-0.701029	0.483285	0.999653	Grin2d	glutamate receptor, ionotropic, NMDA2D (epsilon 4) [Source:MGI Symbol;Acc:MGI:95823]
ENSMUSG00000002778	3.67656	0.179521	3.16353	0.0567471	0.954747	NA	Kdelr1	KDEL (Lys-Asp-Glu-Leu) endoplasmic reticulum protein retention receptor 1 [Source:MGI Symbol;Acc:MGI:1915387]
ENSMUSG00000002781	1.5662	-0.915075	3.07604	-0.297485	0.766096	NA	Tmem143	transmembrane protein 143 [Source:MGI Symbol;Acc:MGI:1917459]
ENSMUSG00000002797	4.65261	0.0959711	2.33777	0.0410525	0.967254	NA	Ggct	gamma-glutamyl cyclotransferase [Source:MGI Symbol;Acc:MGI:95700]
ENSMUSG00000002799	5.48577	0.107359	1.5137	0.0709252	0.943457	NA	Jag2	jagged 2 [Source:MGI Symbol;Acc:MGI:1098270]
ENSMUSG00000002803	1.90848	-0.708408	2.82969	-0.250348	0.802318	NA	Btbd6	BTB domain containing 6 [Source:MGI Symbol;Acc:MGI:3026623]
ENSMUSG00000002804	2.05179	0.306804	3.63907	0.0843085	0.932811	NA	Nudt14	nudix hydrolase 14 [Source:MGI Symbol;Acc:MGI:1913424]
ENSMUSG00000002808	0.111833	-2.24828	6.23087	-0.36083	0.718226	NA	Epdr1	ependymin related 1 [Source:MGI Symbol;Acc:MGI:2145369]
ENSMUSG00000002812	26.5643	0.70712	0.554566	1.27509	0.202278	0.822103	Flii	flightless I actin binding protein [Source:MGI Symbol;Acc:MGI:1342286]
ENSMUSG00000002814	13.8394	0.964639	1.83664	0.525221	0.59943	0.999653	Top3a	topoisomerase (DNA) III alpha [Source:MGI Symbol;Acc:MGI:1197527]
ENSMUSG00000002820	56.178	-0.309238	0.612225	-0.505105	0.613485	0.999653	Atg4d	autophagy related 4D, cysteine peptidase [Source:MGI Symbol;Acc:MGI:2444308]
ENSMUSG00000002825	3.7684	1.57865	2.55586	0.617662	0.536798	NA	Qtrt1	queuine tRNA-ribosyltransferase catalytic subunit 1 [Source:MGI Symbol;Acc:MGI:1931441]
ENSMUSG00000002831	0.74442	-0.665097	6.07779	-0.109431	0.912861	NA	Plin4	perilipin 4 [Source:MGI Symbol;Acc:MGI:1929709]
ENSMUSG00000002833	61.1583	-0.316224	1.72281	-0.183551	0.854365	0.999653	Hdgfl2	HDGF like 2 [Source:MGI Symbol;Acc:MGI:1194492]
ENSMUSG00000002835	4058.26	-0.841498	0.114189	-7.36931	1.72e-13	1.61e-11	Chaf1a	chromatin assembly factor 1, subunit A [Source:MGI Symbol;Acc:MGI:1351331]
ENSMUSG00000002844	26.5037	0.261347	0.713359	0.366361	0.714096	0.999653	Adprh	ADP-ribosylarginine hydrolase [Source:MGI Symbol;Acc:MGI:1098234]
ENSMUSG00000002845	1.82678	-0.19318	3.57256	-0.0540735	0.956877	NA	Tmem39a	transmembrane protein 39a [Source:MGI Symbol;Acc:MGI:1915096]
ENSMUSG00000002846	5.09789	1.33431	1.65343	0.806991	0.419672	NA	Timmdc1	translocase of inner mitochondrial membrane domain containing 1 [Source:MGI Symbol;Acc:MGI:1922139]
ENSMUSG00000002847	6.29028	1.29914	1.61373	0.805053	0.420789	NA	Pla1a	phospholipase A1 member A [Source:MGI Symbol;Acc:MGI:1934677]
ENSMUSG00000002870	11.408	1.36063	1.72812	0.787343	0.431081	0.999653	Mcm2	minichromosome maintenance complex component 2 [Source:MGI Symbol;Acc:MGI:105380]
ENSMUSG00000002871	0.538039	1.51618	6.02492	0.251652	0.80131	NA	Tpra1	transmembrane protein, adipocyte asscociated 1 [Source:MGI Symbol;Acc:MGI:1345190]
ENSMUSG00000002881	1.92957	-0.0230559	2.83549	-0.00813121	0.993512	NA	Nab1	Ngfi-A binding protein 1 [Source:MGI Symbol;Acc:MGI:107564]
ENSMUSG00000002885	4.50956	1.01427	2.54184	0.39903	0.689871	NA	Adgre5	adhesion G protein-coupled receptor E5 [Source:MGI Symbol;Acc:MGI:1347095]
ENSMUSG00000002897	1.99407	4.84314	2.81751	1.71895	0.0856242	NA	Il17ra	interleukin 17 receptor A [Source:MGI Symbol;Acc:MGI:107399]
ENSMUSG00000002900	12.2515	3.37229	1.89292	1.78153	0.0748265	0.485433	Lamb1	laminin B1 [Source:MGI Symbol;Acc:MGI:96743]
ENSMUSG00000002908	0.440215	2.85133	6.13918	0.464449	0.642326	NA	Kcnn1	potassium intermediate/small conductance calcium-activated channel, subfamily N, member 1 [Source:MGI Symbol;Acc:MGI:1933993]
ENSMUSG00000002910	0.929013	0.785344	4.45105	0.17644	0.859948	NA	Arrdc2	arrestin domain containing 2 [Source:MGI Symbol;Acc:MGI:1918057]
ENSMUSG00000002930	0	NA	NA	NA	NA	NA	Ppp1r17	protein phosphatase 1, regulatory subunit 17 [Source:MGI Symbol;Acc:MGI:1333876]
ENSMUSG00000002944	2.14226	2.13545	3.35784	0.63596	0.524803	NA	Cd36	CD36 molecule [Source:MGI Symbol;Acc:MGI:107899]
ENSMUSG00000002948	0.257855	1.96012	6.15473	0.318474	0.750126	NA	Map2k7	mitogen-activated protein kinase kinase 7 [Source:MGI Symbol;Acc:MGI:1346871]
ENSMUSG00000002949	15.5141	-0.77326	1.80689	-0.42795	0.668688	0.999653	Timm44	translocase of inner mitochondrial membrane 44 [Source:MGI Symbol;Acc:MGI:1343262]
ENSMUSG00000002957	169.036	-0.119936	0.416259	-0.288129	0.773248	0.999653	Ap2a2	adaptor-related protein complex 2, alpha 2 subunit [Source:MGI Symbol;Acc:MGI:101920]
ENSMUSG00000002963	10.815	-1.66599	1.92727	-0.864426	0.387354	NA	Pnkp	polynucleotide kinase 3'- phosphatase [Source:MGI Symbol;Acc:MGI:1891698]
ENSMUSG00000002968	77.1883	-0.212018	0.946277	-0.224055	0.822715	0.999653	Med25	mediator complex subunit 25 [Source:MGI Symbol;Acc:MGI:1922863]
ENSMUSG00000002980	3.64269	-1.17681	1.57081	-0.749179	0.453749	NA	Bcam	basal cell adhesion molecule [Source:MGI Symbol;Acc:MGI:1929940]
ENSMUSG00000002981	28.9081	0.013171	1.79071	0.00735517	0.994131	0.999653	Clptm1	cleft lip and palate associated transmembrane protein 1 [Source:MGI Symbol;Acc:MGI:1927155]
ENSMUSG00000002983	1.12856	0.473277	3.94032	0.120111	0.904395	NA	Relb	avian reticuloendotheliosis viral (v-rel) oncogene related B [Source:MGI Symbol;Acc:MGI:103289]
ENSMUSG00000002984	3.45214	0.532147	2.61315	0.203641	0.838634	NA	Tomm40	translocase of outer mitochondrial membrane 40 [Source:MGI Symbol;Acc:MGI:1858259]
ENSMUSG00000002985	65.582	-0.0621262	1.70556	-0.0364257	0.970943	0.999653	Apoe	apolipoprotein E [Source:MGI Symbol;Acc:MGI:88057]
ENSMUSG00000002992	0	NA	NA	NA	NA	NA	Apoc2	apolipoprotein C2 [Source:MGI Symbol;Acc:MGI:88054]
ENSMUSG00000002996	22.8227	-0.14945	0.885974	-0.168684	0.866045	0.999653	Hbp1	high mobility group box transcription factor 1 [Source:MGI Symbol;Acc:MGI:894659]
ENSMUSG00000002997	1.96418	0.837455	3.54069	0.236523	0.813027	NA	Prkar2b	protein kinase, cAMP dependent regulatory, type II beta [Source:MGI Symbol;Acc:MGI:97760]
ENSMUSG00000003031	11.1543	-0.389723	1.95511	-0.199336	0.842	0.999653	Cdkn1b	cyclin dependent kinase inhibitor 1B [Source:MGI Symbol;Acc:MGI:104565]
ENSMUSG00000003032	97.8448	-2.40303	0.375051	-6.40722	1.48e-10	9.99e-09	Klf4	Kruppel-like transcription factor 4 (gut) [Source:MGI Symbol;Acc:MGI:1342287]
ENSMUSG00000003033	97.6986	0.245654	0.396959	0.61884	0.536022	0.999653	Ap1m1	adaptor-related protein complex AP-1, mu subunit 1 [Source:MGI Symbol;Acc:MGI:102776]
ENSMUSG00000003037	33.1064	0.41067	0.527791	0.778092	0.436515	0.999653	Rab8a	RAB8A, member RAS oncogene family [Source:MGI Symbol;Acc:MGI:96960]
ENSMUSG00000003038	0.692827	-2.24185	5.82492	-0.384872	0.700332	NA	Hmgn2	high mobility group nucleosomal binding domain 2 [Source:MGI Symbol;Acc:MGI:96136]
ENSMUSG00000003039	9.86823	-2.43242	1.92147	-1.26591	0.205544	NA	Fam32a	family with sequence similarity 32, member A [Source:MGI Symbol;Acc:MGI:1915172]
ENSMUSG00000003051	0.613499	-3.45274	6.19379	-0.557451	0.577219	NA	Elf3	E74-like factor 3 [Source:MGI Symbol;Acc:MGI:1101781]
ENSMUSG00000003053	0	NA	NA	NA	NA	NA	Cyp2c29	cytochrome P450, family 2, subfamily c, polypeptide 29 [Source:MGI Symbol;Acc:MGI:103238]
ENSMUSG00000003062	4.96995	-0.67398	2.13158	-0.316187	0.75186	NA	Stard3nl	STARD3 N-terminal like [Source:MGI Symbol;Acc:MGI:1923455]
ENSMUSG00000003068	50.6811	-0.114075	1.71712	-0.0664342	0.947032	0.999653	Stk11	serine/threonine kinase 11 [Source:MGI Symbol;Acc:MGI:1341870]
ENSMUSG00000003070	0.276579	0.357579	6.20964	0.0575846	0.95408	NA	Efna2	ephrin A2 [Source:MGI Symbol;Acc:MGI:102707]
ENSMUSG00000003072	18.6064	-0.924158	1.83685	-0.503121	0.614879	0.999653	Atp5f1d	ATP synthase F1 subunit delta [Source:MGI Symbol;Acc:MGI:1913293]
ENSMUSG00000003099	23.7839	-0.236765	1.75797	-0.134681	0.892864	0.999653	Ppp5c	protein phosphatase 5, catalytic subunit [Source:MGI Symbol;Acc:MGI:102666]
ENSMUSG00000003119	16.48	2.00501	1.57577	1.2724	0.203229	0.82417	Cdk12	cyclin dependent kinase 12 [Source:MGI Symbol;Acc:MGI:1098802]
ENSMUSG00000003123	629.064	-0.18263	0.344014	-0.53088	0.595502	0.999653	Lipe	lipase, hormone sensitive [Source:MGI Symbol;Acc:MGI:96790]
ENSMUSG00000003131	73.559	-0.432038	0.452732	-0.95429	0.339937	0.999653	Pafah1b2	platelet-activating factor acetylhydrolase, isoform 1b, subunit 2 [Source:MGI Symbol;Acc:MGI:108415]
ENSMUSG00000003134	14.3701	0.840553	0.699041	1.20244	0.229194	0.873671	Tbc1d8	TBC1 domain family, member 8 [Source:MGI Symbol;Acc:MGI:1927225]
ENSMUSG00000003135	9.77644	0.986467	1.92812	0.511621	0.608917	NA	Cnot11	CCR4-NOT transcription complex, subunit 11 [Source:MGI Symbol;Acc:MGI:106580]
ENSMUSG00000003153	390.232	0.510016	1.67693	0.304137	0.761024	0.999653	Slc2a3	solute carrier family 2 (facilitated glucose transporter), member 3 [Source:MGI Symbol;Acc:MGI:95757]
ENSMUSG00000003154	10.3753	-2.8781	1.26166	-2.2812	0.0225368	NA	Foxj2	forkhead box J2 [Source:MGI Symbol;Acc:MGI:1926805]
ENSMUSG00000003161	0.49165	3.00414	6.13687	0.489522	0.624472	NA	Sri	sorcin [Source:MGI Symbol;Acc:MGI:98419]
ENSMUSG00000003166	1.36531	0.17141	6.07251	0.0282272	0.977481	NA	Dgcr2	DiGeorge syndrome critical region gene 2 [Source:MGI Symbol;Acc:MGI:892866]
ENSMUSG00000003184	7.72495	-2.75216	1.73824	-1.5833	0.113352	NA	Irf3	interferon regulatory factor 3 [Source:MGI Symbol;Acc:MGI:1859179]
ENSMUSG00000003190	7.78228	-0.247205	2.24741	-0.109996	0.912413	NA	Bcl2l12	BCL2 like 12 [Source:MGI Symbol;Acc:MGI:1922986]
ENSMUSG00000003198	0.398942	-2.02577	6.20926	-0.326251	0.744235	NA	Zfp959	zinc finger protein 959 [Source:MGI Symbol;Acc:MGI:2385058]
ENSMUSG00000003199	0.912036	4.17644	6.12749	0.681592	0.495497	NA	Mpnd	MPN domain containing [Source:MGI Symbol;Acc:MGI:1915297]
ENSMUSG00000003200	37.7791	-0.349946	0.538083	-0.650357	0.515461	0.999653	Sh3gl1	SH3-domain GRB2-like 1 [Source:MGI Symbol;Acc:MGI:700010]
ENSMUSG00000003206	0.128232	0.613599	6.23255	0.0984506	0.921574	NA	Ebi3	Epstein-Barr virus induced gene 3 [Source:MGI Symbol;Acc:MGI:1354171]
ENSMUSG00000003208	1.21084	-0.365945	5.14003	-0.0711952	0.943242	NA	Yju2	YJU2 splicing factor [Source:MGI Symbol;Acc:MGI:1920136]
ENSMUSG00000003226	233.036	0.439542	0.183667	2.39314	0.0167046	0.189032	Ranbp2	RAN binding protein 2 [Source:MGI Symbol;Acc:MGI:894323]
ENSMUSG00000003227	13.8186	1.27024	1.74769	0.726813	0.467341	0.999653	Edar	ectodysplasin-A receptor [Source:MGI Symbol;Acc:MGI:1343498]
ENSMUSG00000003228	12.5731	0.0768569	1.1096	0.0692651	0.944779	0.999653	Grk5	G protein-coupled receptor kinase 5 [Source:MGI Symbol;Acc:MGI:109161]
ENSMUSG00000003233	2.36258	0.275503	3.50621	0.0785756	0.93737	NA	Dvl3	dishevelled segment polarity protein 3 [Source:MGI Symbol;Acc:MGI:108100]
ENSMUSG00000003234	30.9342	0.840692	1.02735	0.818309	0.413181	0.999653	Abcf3	ATP-binding cassette, sub-family F member 3 [Source:MGI Symbol;Acc:MGI:1351656]
ENSMUSG00000003235	64.5771	0.0648408	0.339174	0.191173	0.84839	0.999653	Eif2b5	eukaryotic translation initiation factor 2B, subunit 5 epsilon [Source:MGI Symbol;Acc:MGI:2446176]
ENSMUSG00000003269	59.7615	0.179167	1.70205	0.105265	0.916165	0.999653	Cyth2	cytohesin 2 [Source:MGI Symbol;Acc:MGI:1334255]
ENSMUSG00000003271	0.0939714	0.391829	6.21038	0.0630926	0.949693	NA	Sult2b1	sulfotransferase family, cytosolic, 2B, member 1 [Source:MGI Symbol;Acc:MGI:1926342]
ENSMUSG00000003273	0.313238	1.711	6.16429	0.277566	0.781346	NA	Car11	carbonic anhydrase 11 [Source:MGI Symbol;Acc:MGI:1336193]
ENSMUSG00000003279	1.24525	1.00474	5.00044	0.20093	0.840754	NA	Dlgap1	DLG associated protein 1 [Source:MGI Symbol;Acc:MGI:1346065]
ENSMUSG00000003282	1.34015	3.6764	5.41412	0.679039	0.497113	NA	Plag1	pleiomorphic adenoma gene 1 [Source:MGI Symbol;Acc:MGI:1891916]
ENSMUSG00000003283	0.252272	1.31305	6.17695	0.212573	0.83166	NA	Hck	hemopoietic cell kinase [Source:MGI Symbol;Acc:MGI:96052]
ENSMUSG00000003299	9.96332	-2.26547	1.74275	-1.29994	0.19362	NA	Mrpl4	mitochondrial ribosomal protein L4 [Source:MGI Symbol;Acc:MGI:2137210]
ENSMUSG00000003308	13.1749	-0.312794	1.9699	-0.158787	0.873837	0.999653	Keap1	kelch-like ECH-associated protein 1 [Source:MGI Symbol;Acc:MGI:1858732]
ENSMUSG00000003309	0.175863	1.86244	6.15477	0.302602	0.762193	NA	Ap1m2	adaptor protein complex AP-1, mu 2 subunit [Source:MGI Symbol;Acc:MGI:1336974]
ENSMUSG00000003316	32.1032	0.37234	1.7682	0.210576	0.833218	0.999653	Glg1	golgi apparatus protein 1 [Source:MGI Symbol;Acc:MGI:104967]
ENSMUSG00000003341	3041.72	-1.19113	0.152008	-7.83592	4.65e-15	4.89e-13	Atp8b3	ATPase, class I, type 8B, member 3 [Source:MGI Symbol;Acc:MGI:1914581]
ENSMUSG00000003344	4.40363	-0.525094	2.28775	-0.229524	0.818461	NA	Btbd2	BTB domain containing 2 [Source:MGI Symbol;Acc:MGI:1933831]
ENSMUSG00000003345	773.881	-1.61252	0.419439	-3.84447	0.000120813	0.00317493	Csnk1g2	casein kinase 1, gamma 2 [Source:MGI Symbol;Acc:MGI:1920014]
ENSMUSG00000003346	74.2077	-0.699863	1.70148	-0.411326	0.680834	0.999653	Abhd17a	abhydrolase domain containing 17A [Source:MGI Symbol;Acc:MGI:106388]
ENSMUSG00000003348	5.85565	-1.0358	1.48655	-0.696782	0.485939	NA	Mob3a	MOB kinase activator 3A [Source:MGI Symbol;Acc:MGI:3050117]
ENSMUSG00000003352	0.219166	2.12578	6.14895	0.345715	0.729557	NA	Cacnb3	calcium channel, voltage-dependent, beta 3 subunit [Source:MGI Symbol;Acc:MGI:103307]
ENSMUSG00000003354	166.95	0.0484994	0.289367	0.167605	0.866894	0.999653	Ccdc65	coiled-coil domain containing 65 [Source:MGI Symbol;Acc:MGI:2146001]
ENSMUSG00000003355	0	NA	NA	NA	NA	NA	Fkbp11	FK506 binding protein 11 [Source:MGI Symbol;Acc:MGI:1913370]
ENSMUSG00000003360	27.4173	0.778599	0.607536	1.28157	0.199994	0.818181	Ddx23	DEAD box helicase 23 [Source:MGI Symbol;Acc:MGI:1921601]
ENSMUSG00000003363	19.3298	1.06343	1.92301	0.553004	0.580261	0.999653	Pld3	phospholipase D family member 3 [Source:MGI Symbol;Acc:MGI:1333782]
ENSMUSG00000003378	26.6836	-0.179313	1.74683	-0.102651	0.91824	0.999653	Grik5	glutamate receptor, ionotropic, kainate 5 (gamma 2) [Source:MGI Symbol;Acc:MGI:95818]
ENSMUSG00000003379	1.98408	-0.956865	3.73017	-0.25652	0.797549	NA	Cd79a	CD79A antigen (immunoglobulin-associated alpha) [Source:MGI Symbol;Acc:MGI:101774]
ENSMUSG00000003380	92.5719	-0.440914	1.06843	-0.412674	0.679845	0.999653	Rabac1	Rab acceptor 1 (prenylated) [Source:MGI Symbol;Acc:MGI:1201692]
ENSMUSG00000003382	2.53283	-0.754991	3.16029	-0.2389	0.811183	NA	Etv3	ets variant 3 [Source:MGI Symbol;Acc:MGI:1350926]
ENSMUSG00000003402	38.5738	0.670146	1.73397	0.386481	0.699141	0.999653	Prkcsh	protein kinase C substrate 80K-H [Source:MGI Symbol;Acc:MGI:107877]
ENSMUSG00000003410	3.32598	1.8576	2.67492	0.694451	0.4874	NA	Elavl3	ELAV like RNA binding protein 3 [Source:MGI Symbol;Acc:MGI:109157]
ENSMUSG00000003411	2.12281	1.01193	3.32775	0.304088	0.761061	NA	Rab3b	RAB3B, member RAS oncogene family [Source:MGI Symbol;Acc:MGI:1917158]
ENSMUSG00000003418	0.189414	-1.34618	6.21882	-0.216468	0.828623	NA	St8sia6	ST8 alpha-N-acetyl-neuraminide alpha-2,8-sialyltransferase 6 [Source:MGI Symbol;Acc:MGI:2386797]
ENSMUSG00000003420	1.53372	3.35639	4.55798	0.736375	0.461502	NA	Fcgrt	Fc fragment of IgG receptor and transporter [Source:MGI Symbol;Acc:MGI:103017]
ENSMUSG00000003421	33.8704	2.25689	1.05776	2.13364	0.0328723	0.293767	Nosip	nitric oxide synthase interacting protein [Source:MGI Symbol;Acc:MGI:1913644]
ENSMUSG00000003423	61.0516	0.0789194	1.72087	0.0458601	0.963422	0.999653	Pih1d1	PIH1 domain containing 1 [Source:MGI Symbol;Acc:MGI:1916095]
ENSMUSG00000003429	6.65623	0.655653	2.02448	0.323862	0.746043	NA	Rps11	ribosomal protein S11 [Source:MGI Symbol;Acc:MGI:1351329]
ENSMUSG00000003435	113.477	0.161568	1.6924	0.0954666	0.923944	0.999653	Supt5	suppressor of Ty 5, DSIF elongation factor subunit [Source:MGI Symbol;Acc:MGI:1202400]
ENSMUSG00000003436	5.73045	3.5913	1.80522	1.9894	0.0466575	NA	Dll3	delta like canonical Notch ligand 3 [Source:MGI Symbol;Acc:MGI:1096877]
ENSMUSG00000003437	32.4672	-0.0594082	1.73679	-0.0342058	0.972713	0.999653	Paf1	Paf1, RNA polymerase II complex component [Source:MGI Symbol;Acc:MGI:1923988]
ENSMUSG00000003438	4.19146	-0.593066	2.93253	-0.202237	0.839731	NA	Timm50	translocase of inner mitochondrial membrane 50 [Source:MGI Symbol;Acc:MGI:1913775]
ENSMUSG00000003444	31.7656	1.27537	0.854499	1.49253	0.135559	0.672052	Med29	mediator complex subunit 29 [Source:MGI Symbol;Acc:MGI:1914474]
ENSMUSG00000003452	4.61785	-0.707615	2.14584	-0.329761	0.741581	NA	Bicd1	BICD cargo adaptor 1 [Source:MGI Symbol;Acc:MGI:1101760]
ENSMUSG00000003458	49.0327	0.538323	1.74166	0.309085	0.757257	0.999653	Ncstn	nicastrin [Source:MGI Symbol;Acc:MGI:1891700]
ENSMUSG00000003464	11.6401	-0.0827892	1.8709	-0.0442509	0.964704	0.999653	Pex19	peroxisomal biogenesis factor 19 [Source:MGI Symbol;Acc:MGI:1334458]
ENSMUSG00000003469	0.720641	-1.95765	6.16295	-0.317648	0.750752	NA	Phyhip	phytanoyl-CoA hydroxylase interacting protein [Source:MGI Symbol;Acc:MGI:1860417]
ENSMUSG00000003476	0.433067	-2.00506	6.21116	-0.322816	0.746835	NA	Crhr2	corticotropin releasing hormone receptor 2 [Source:MGI Symbol;Acc:MGI:894312]
ENSMUSG00000003477	1.80241	1.58596	4.17949	0.379463	0.704344	NA	Inmt	indolethylamine N-methyltransferase [Source:MGI Symbol;Acc:MGI:102963]
ENSMUSG00000003484	0.334807	-0.0752406	6.1761	-0.0121825	0.99028	NA	Cyp4f18	cytochrome P450, family 4, subfamily f, polypeptide 18 [Source:MGI Symbol;Acc:MGI:1919304]
ENSMUSG00000003500	2.22406	0.246939	3.33363	0.0740751	0.940951	NA	Impdh1	inosine monophosphate dehydrogenase 1 [Source:MGI Symbol;Acc:MGI:96567]
ENSMUSG00000003505	0	NA	NA	NA	NA	NA	Psg18	pregnancy specific beta-1-glycoprotein 18 [Source:MGI Symbol;Acc:MGI:1347251]
ENSMUSG00000003518	34.6637	1.49985	1.63986	0.914617	0.360393	0.999653	Dusp3	dual specificity phosphatase 3 (vaccinia virus phosphatase VH1-related) [Source:MGI Symbol;Acc:MGI:1919599]
ENSMUSG00000003526	0.333106	-3.44077	6.19476	-0.555432	0.578599	NA	Prodh	proline dehydrogenase [Source:MGI Symbol;Acc:MGI:97770]
ENSMUSG00000003527	11.2826	-0.517628	1.8481	-0.280087	0.779411	0.999653	Ess2	ess-2 splicing factor [Source:MGI Symbol;Acc:MGI:107854]
ENSMUSG00000003528	11.2639	-0.167166	1.36431	-0.122528	0.902481	0.999653	Slc25a1	solute carrier family 25 (mitochondrial carrier, citrate transporter), member 1 [Source:MGI Symbol;Acc:MGI:1345283]
ENSMUSG00000003531	36.074	-0.729051	1.73116	-0.421135	0.673657	0.999653	Dgcr6	DiGeorge syndrome critical region gene 6 [Source:MGI Symbol;Acc:MGI:1202877]
ENSMUSG00000003534	8.78188	0.940433	2.10697	0.446345	0.655348	NA	Ddr1	discoidin domain receptor family, member 1 [Source:MGI Symbol;Acc:MGI:99216]
ENSMUSG00000003541	3.82999	1.21523	2.14773	0.56582	0.571516	NA	Ier3	immediate early response 3 [Source:MGI Symbol;Acc:MGI:104814]
ENSMUSG00000003545	1.47913	-1.28255	4.8876	-0.262409	0.793006	NA	Fosb	FBJ osteosarcoma oncogene B [Source:MGI Symbol;Acc:MGI:95575]
ENSMUSG00000003546	14.1092	-3.288	1.6279	-2.01977	0.0434068	0.348824	Klc4	kinesin light chain 4 [Source:MGI Symbol;Acc:MGI:1922014]
ENSMUSG00000003549	6.37403	0.245469	1.99549	0.123012	0.902097	NA	Ercc1	excision repair cross-complementing rodent repair deficiency, complementation group 1 [Source:MGI Symbol;Acc:MGI:95412]
ENSMUSG00000003555	8.23168	1.37431	2.01294	0.68274	0.494771	NA	Cyp17a1	cytochrome P450, family 17, subfamily a, polypeptide 1 [Source:MGI Symbol;Acc:MGI:88586]
ENSMUSG00000003559	6.90232	0.786318	1.72207	0.456611	0.647951	NA	As3mt	arsenite methyltransferase [Source:MGI Symbol;Acc:MGI:1929882]
ENSMUSG00000003573	0.899456	-0.924633	5.67946	-0.162803	0.870673	NA	Homer3	homer scaffolding protein 3 [Source:MGI Symbol;Acc:MGI:1347359]
ENSMUSG00000003575	3.13839	-1.79059	3.19709	-0.560069	0.575433	NA	Crtc1	CREB regulated transcription coactivator 1 [Source:MGI Symbol;Acc:MGI:2142523]
ENSMUSG00000003581	8.2258	1.11114	1.15842	0.959186	0.337465	NA	Rnf215	ring finger protein 215 [Source:MGI Symbol;Acc:MGI:1918923]
ENSMUSG00000003585	9.43921	-2.07356	1.63021	-1.27196	0.203388	NA	Sec14l2	SEC14-like lipid binding 2 [Source:MGI Symbol;Acc:MGI:1915065]
ENSMUSG00000003604	124.56	0.0251479	0.331371	0.0758904	0.939506	0.999653	Aven	apoptosis, caspase activation inhibitor [Source:MGI Symbol;Acc:MGI:1921518]
ENSMUSG00000003617	5.74981	0.269927	1.54942	0.174211	0.861699	NA	Cp	ceruloplasmin [Source:MGI Symbol;Acc:MGI:88476]
ENSMUSG00000003623	5.25088	-1.38829	1.65194	-0.840399	0.400685	NA	Crot	carnitine O-octanoyltransferase [Source:MGI Symbol;Acc:MGI:1921364]
ENSMUSG00000003644	15.2375	-0.752699	1.8229	-0.412912	0.679671	0.999653	Rps6ka1	ribosomal protein S6 kinase polypeptide 1 [Source:MGI Symbol;Acc:MGI:104558]
ENSMUSG00000003657	0.306749	-2.79851	6.21922	-0.449977	0.652727	NA	Calb2	calbindin 2 [Source:MGI Symbol;Acc:MGI:101914]
ENSMUSG00000003660	247.204	0.711421	0.260115	2.73503	0.00623755	0.0895493	Snrnp200	small nuclear ribonucleoprotein 200 (U5) [Source:MGI Symbol;Acc:MGI:2444401]
ENSMUSG00000003662	14.2561	-0.503261	0.967132	-0.520365	0.602809	0.999653	Ciao1	cytosolic iron-sulfur protein assembly 1 [Source:MGI Symbol;Acc:MGI:1346998]
ENSMUSG00000003665	2.0993	1.06297	3.08027	0.345089	0.730028	NA	Has1	hyaluronan synthase 1 [Source:MGI Symbol;Acc:MGI:106590]
ENSMUSG00000003680	12.3432	-0.490364	1.85992	-0.263648	0.792051	0.999653	Taf6l	TATA-box binding protein associated factor 6 like [Source:MGI Symbol;Acc:MGI:2444957]
ENSMUSG00000003721	10.7493	1.37663	1.15384	1.19309	0.232836	NA	Insig2	insulin induced gene 2 [Source:MGI Symbol;Acc:MGI:1920249]
ENSMUSG00000003731	150.217	-1.03273	1.68906	-0.611423	0.54092	0.999653	Kpna6	karyopherin subunit alpha 6 [Source:MGI Symbol;Acc:MGI:1100836]
ENSMUSG00000003746	0.831824	-2.13388	4.59515	-0.464376	0.642378	NA	Man1a	mannosidase 1, alpha [Source:MGI Symbol;Acc:MGI:104677]
ENSMUSG00000003752	11.2213	-0.871177	1.49977	-0.580874	0.561325	0.999653	Itpkc	inositol 1,4,5-trisphosphate 3-kinase C [Source:MGI Symbol;Acc:MGI:2442554]
ENSMUSG00000003762	6.53986	-0.0124687	2.09777	-0.00594381	0.995258	NA	Coq8b	coenzyme Q8B [Source:MGI Symbol;Acc:MGI:1924139]
ENSMUSG00000003778	27.5964	-0.234549	1.74475	-0.134432	0.893061	0.999653	Brd8	bromodomain containing 8 [Source:MGI Symbol;Acc:MGI:1925906]
ENSMUSG00000003779	36.7853	3.09966	1.55175	1.99753	0.0457681	0.359764	Kif20a	kinesin family member 20A [Source:MGI Symbol;Acc:MGI:1201682]
ENSMUSG00000003808	18.9833	0.161972	1.88705	0.0858334	0.931599	0.999653	Farsa	phenylalanyl-tRNA synthetase, alpha subunit [Source:MGI Symbol;Acc:MGI:1913840]
ENSMUSG00000003809	2.49749	0.893292	3.36003	0.265858	0.790348	NA	Gcdh	glutaryl-Coenzyme A dehydrogenase [Source:MGI Symbol;Acc:MGI:104541]
ENSMUSG00000003810	121.239	-0.690158	1.68441	-0.409732	0.682003	0.999653	Mast2	microtubule associated serine/threonine kinase 2 [Source:MGI Symbol;Acc:MGI:894676]
ENSMUSG00000003812	0.598621	1.14011	6.11294	0.186508	0.852046	NA	Dnase2a	deoxyribonuclease II alpha [Source:MGI Symbol;Acc:MGI:1329019]
ENSMUSG00000003813	13.2777	-0.25455	1.85062	-0.137549	0.890597	0.999653	Rad23a	RAD23 homolog A, nucleotide excision repair protein [Source:MGI Symbol;Acc:MGI:105126]
ENSMUSG00000003814	309.434	0.490767	0.305032	1.6089	0.107638	0.59952	Calr	calreticulin [Source:MGI Symbol;Acc:MGI:88252]
ENSMUSG00000003824	122.358	-0.869475	1.69037	-0.514368	0.606995	0.999653	Syce2	synaptonemal complex central element protein 2 [Source:MGI Symbol;Acc:MGI:1919096]
ENSMUSG00000003847	8.2979	0.25267	2.0183	0.12519	0.900373	NA	Nfat5	nuclear factor of activated T cells 5 [Source:MGI Symbol;Acc:MGI:1859333]
ENSMUSG00000003848	3.09532	0.259318	2.32136	0.11171	0.911054	NA	Nob1	NIN1/RPN12 binding protein 1 homolog [Source:MGI Symbol;Acc:MGI:1914869]
ENSMUSG00000003849	0.490407	3.62457	6.13836	0.590477	0.554871	NA	Nqo1	NAD(P)H dehydrogenase, quinone 1 [Source:MGI Symbol;Acc:MGI:103187]
ENSMUSG00000003863	0	NA	NA	NA	NA	NA	Ppfia3	protein tyrosine phosphatase, receptor type, f polypeptide (PTPRF), interacting protein (liprin), alpha 3 [Source:MGI Symbol;Acc:MGI:1924037]
ENSMUSG00000003865	0.648707	1.3047	5.94512	0.219458	0.826293	NA	Gys1	glycogen synthase 1, muscle [Source:MGI Symbol;Acc:MGI:101805]
ENSMUSG00000003868	107.999	0.115439	1.69652	0.0680446	0.94575	0.999653	Ruvbl2	RuvB-like AAA ATPase 2 [Source:MGI Symbol;Acc:MGI:1342299]
ENSMUSG00000003872	0.560538	7.61005	6.11183	1.24514	0.213082	NA	Lin7b	lin-7 homolog B, crumbs cell polarity complex component [Source:MGI Symbol;Acc:MGI:1330858]
ENSMUSG00000003873	1.44667	1.87321	6.12263	0.305948	0.759644	NA	Bax	BCL2-associated X protein [Source:MGI Symbol;Acc:MGI:99702]
ENSMUSG00000003882	0	NA	NA	NA	NA	NA	Il7r	interleukin 7 receptor [Source:MGI Symbol;Acc:MGI:96562]
ENSMUSG00000003923	517.565	-0.820767	0.273722	-2.99854	0.00271277	0.0476618	Tfam	transcription factor A, mitochondrial [Source:MGI Symbol;Acc:MGI:107810]
ENSMUSG00000003929	1.90759	-3.75525	3.12248	-1.20265	0.229112	NA	Zfp81	zinc finger protein 81 [Source:MGI Symbol;Acc:MGI:1890752]
ENSMUSG00000003934	5.89243	2.0457	2.12949	0.960653	0.336726	NA	Efnb3	ephrin B3 [Source:MGI Symbol;Acc:MGI:109196]
ENSMUSG00000003948	0	NA	NA	NA	NA	NA	Mmd	monocyte to macrophage differentiation-associated [Source:MGI Symbol;Acc:MGI:1914718]
ENSMUSG00000003949	0.40601	-0.729577	6.21339	-0.11742	0.906527	NA	Hlf	hepatic leukemia factor [Source:MGI Symbol;Acc:MGI:96108]
ENSMUSG00000003955	6.6217	-2.04898	1.92046	-1.06692	0.286009	NA	Fam162a	family with sequence similarity 162, member A [Source:MGI Symbol;Acc:MGI:1917436]
ENSMUSG00000003970	75.7581	-0.29764	1.72477	-0.172568	0.862991	0.999653	Rpl8	ribosomal protein L8 [Source:MGI Symbol;Acc:MGI:1350927]
ENSMUSG00000003974	1.43427	-5.25007	6.1409	-0.854936	0.392587	NA	Grm3	glutamate receptor, metabotropic 3 [Source:MGI Symbol;Acc:MGI:1351340]
ENSMUSG00000003992	2.7447	0.063891	2.5578	0.0249789	0.980072	NA	Ssbp2	single-stranded DNA binding protein 2 [Source:MGI Symbol;Acc:MGI:1914220]
ENSMUSG00000004018	59.0072	0.188087	0.530715	0.354402	0.723037	0.999653	Fancl	Fanconi anemia, complementation group L [Source:MGI Symbol;Acc:MGI:1914280]
ENSMUSG00000004031	0	NA	NA	NA	NA	NA	Brinp2	bone morphogenic protein/retinoic acid inducible neural-specific 2 [Source:MGI Symbol;Acc:MGI:2443333]
ENSMUSG00000004032	1969.56	-0.898203	1.66924	-0.538091	0.590514	0.999653	Gstm5	glutathione S-transferase, mu 5 [Source:MGI Symbol;Acc:MGI:1309466]
ENSMUSG00000004035	23.3428	-0.599793	1.08663	-0.551974	0.580966	0.999653	Gstm7	glutathione S-transferase, mu 7 [Source:MGI Symbol;Acc:MGI:1915562]
ENSMUSG00000004038	0.223665	-2.72388	6.21664	-0.438159	0.661271	NA	Gstm3	glutathione S-transferase, mu 3 [Source:MGI Symbol;Acc:MGI:106026]
ENSMUSG00000004040	10.2109	0.50255	1.88896	0.266045	0.790204	NA	Stat3	signal transducer and activator of transcription 3 [Source:MGI Symbol;Acc:MGI:103038]
ENSMUSG00000004043	0.679406	-2.22139	6.15432	-0.360949	0.718138	NA	Stat5a	signal transducer and activator of transcription 5A [Source:MGI Symbol;Acc:MGI:103036]
ENSMUSG00000004044	11.2886	-2.4806	1.52753	-1.62393	0.104391	0.588584	Cavin1	caveolae associated 1 [Source:MGI Symbol;Acc:MGI:1277968]
ENSMUSG00000004054	11.4161	-0.163888	0.898905	-0.182319	0.855332	0.999653	Map3k11	mitogen-activated protein kinase kinase kinase 11 [Source:MGI Symbol;Acc:MGI:1346880]
ENSMUSG00000004056	3.57256	1.1336	2.97087	0.381572	0.702779	NA	Akt2	thymoma viral proto-oncogene 2 [Source:MGI Symbol;Acc:MGI:104874]
ENSMUSG00000004069	25.2651	1.59751	1.65242	0.966769	0.333659	0.999653	Dnaja3	DnaJ heat shock protein family (Hsp40) member A3 [Source:MGI Symbol;Acc:MGI:1933786]
ENSMUSG00000004070	751.599	0.678603	0.508418	1.33474	0.181963	0.784887	Hmox2	heme oxygenase 2 [Source:MGI Symbol;Acc:MGI:109373]
ENSMUSG00000004071	7361.93	-0.3652	0.754776	-0.483851	0.628491	0.999653	Cdip1	cell death inducing Trp53 target 1 [Source:MGI Symbol;Acc:MGI:1913876]
ENSMUSG00000004085	1.3589	-1.79251	4.40398	-0.407021	0.683993	NA	Map3k20	mitogen-activated protein kinase kinase kinase 20 [Source:MGI Symbol;Acc:MGI:2443258]
ENSMUSG00000004096	10.3288	-0.370348	1.90225	-0.19469	0.845636	NA	Cwc15	CWC15 spliceosome-associated protein [Source:MGI Symbol;Acc:MGI:1913320]
ENSMUSG00000004098	0.928145	3.77833	4.38627	0.861399	0.389018	NA	Col5a3	collagen, type V, alpha 3 [Source:MGI Symbol;Acc:MGI:1858212]
ENSMUSG00000004099	19.4487	-0.037258	1.80128	-0.0206842	0.983498	0.999653	Dnmt1	DNA methyltransferase 1 [Source:MGI Symbol;Acc:MGI:94912]
ENSMUSG00000004100	7.05229	-2.82864	1.77641	-1.59234	0.111309	NA	Ppan	peter pan homolog [Source:MGI Symbol;Acc:MGI:2178445]
ENSMUSG00000004105	6.71517	-0.759219	1.52646	-0.497372	0.618927	NA	Angptl2	angiopoietin-like 2 [Source:MGI Symbol;Acc:MGI:1347002]
ENSMUSG00000004110	1.86049	-2.7613	3.33232	-0.828644	0.407306	NA	Cacna1e	calcium channel, voltage-dependent, R type, alpha 1E subunit [Source:MGI Symbol;Acc:MGI:106217]
ENSMUSG00000004113	0.771391	0.289008	6.09923	0.0473843	0.962207	NA	Cacna1b	calcium channel, voltage-dependent, N type, alpha 1B subunit [Source:MGI Symbol;Acc:MGI:88296]
ENSMUSG00000004127	18.7876	-4.13444	1.76161	-2.34696	0.0189272	0.204506	Trmt10a	tRNA methyltransferase 10A [Source:MGI Symbol;Acc:MGI:1920421]
ENSMUSG00000004151	0	NA	NA	NA	NA	NA	Etv1	ets variant 1 [Source:MGI Symbol;Acc:MGI:99254]
ENSMUSG00000004187	0.479031	3.27872	6.13195	0.534694	0.592861	NA	Kifc2	kinesin family member C2 [Source:MGI Symbol;Acc:MGI:109187]
ENSMUSG00000004207	122.804	0.730593	1.68706	0.433057	0.664973	0.999653	Psap	prosaposin [Source:MGI Symbol;Acc:MGI:97783]
ENSMUSG00000004221	2.07679	1.0983	3.10569	0.353642	0.723608	NA	Ikbkg	inhibitor of kappaB kinase gamma [Source:MGI Symbol;Acc:MGI:1338074]
ENSMUSG00000004231	0.111833	-2.24828	6.23087	-0.36083	0.718226	NA	Pax2	paired box 2 [Source:MGI Symbol;Acc:MGI:97486]
ENSMUSG00000004233	1.11173	-1.0682	4.40833	-0.242314	0.808537	NA	Wars2	tryptophanyl tRNA synthetase 2 (mitochondrial) [Source:MGI Symbol;Acc:MGI:1917810]
ENSMUSG00000004263	0	NA	NA	NA	NA	NA	Atn1	atrophin 1 [Source:MGI Symbol;Acc:MGI:104725]
ENSMUSG00000004264	14.6792	-0.0892792	1.85242	-0.048196	0.96156	0.999653	Phb2	prohibitin 2 [Source:MGI Symbol;Acc:MGI:102520]
ENSMUSG00000004266	0.146705	1.24926	6.17433	0.202331	0.839658	NA	Ptpn6	protein tyrosine phosphatase, non-receptor type 6 [Source:MGI Symbol;Acc:MGI:96055]
ENSMUSG00000004267	0	NA	NA	NA	NA	NA	Eno2	enolase 2, gamma neuronal [Source:MGI Symbol;Acc:MGI:95394]
ENSMUSG00000004268	5.99654	0.884366	2.22497	0.397473	0.691019	NA	Emg1	EMG1 N1-specific pseudouridine methyltransferase [Source:MGI Symbol;Acc:MGI:1315195]
ENSMUSG00000004270	59.3898	0.726774	0.601362	1.20855	0.226837	0.870032	Lpcat3	lysophosphatidylcholine acyltransferase 3 [Source:MGI Symbol;Acc:MGI:1315211]
ENSMUSG00000004285	7.73374	1.56448	1.84121	0.849702	0.395491	NA	Atp6v1f	ATPase, H+ transporting, lysosomal V1 subunit F [Source:MGI Symbol;Acc:MGI:1913394]
ENSMUSG00000004296	0	NA	NA	NA	NA	NA	Il12b	interleukin 12b [Source:MGI Symbol;Acc:MGI:96540]
ENSMUSG00000004317	2.80073	0.719223	2.67632	0.268736	0.788133	NA	Clcn5	chloride channel, voltage-sensitive 5 [Source:MGI Symbol;Acc:MGI:99486]
ENSMUSG00000004319	16.165	-0.430736	1.87412	-0.229833	0.818221	0.999653	Clcn3	chloride channel, voltage-sensitive 3 [Source:MGI Symbol;Acc:MGI:103555]
ENSMUSG00000004328	1.20522	-3.50611	3.92189	-0.893984	0.37133	NA	Hif3a	hypoxia inducible factor 3, alpha subunit [Source:MGI Symbol;Acc:MGI:1859778]
ENSMUSG00000004341	15.8826	0.758733	0.771314	0.983688	0.325269	0.999653	Gpx6	glutathione peroxidase 6 [Source:MGI Symbol;Acc:MGI:1922762]
ENSMUSG00000004344	0	NA	NA	NA	NA	NA	Gpx5	glutathione peroxidase 5 [Source:MGI Symbol;Acc:MGI:104886]
ENSMUSG00000004347	80.9016	0.359659	1.50168	0.239505	0.810714	0.999653	Pde1c	phosphodiesterase 1C [Source:MGI Symbol;Acc:MGI:108413]
ENSMUSG00000004356	61.501	0.595909	0.418953	1.42238	0.154917	0.727407	Utp20	UTP20 small subunit processome component [Source:MGI Symbol;Acc:MGI:1917933]
ENSMUSG00000004359	0	NA	NA	NA	NA	NA	Spic	Spi-C transcription factor (Spi-1/PU.1 related) [Source:MGI Symbol;Acc:MGI:1341168]
ENSMUSG00000004360	0.144155	0.673632	6.20176	0.108619	0.913504	NA	9330159F19Rik	RIKEN cDNA 9330159F19 gene [Source:MGI Symbol;Acc:MGI:3036239]
ENSMUSG00000004364	279.445	0.116359	0.507396	0.229326	0.818616	0.999653	Cul3	cullin 3 [Source:MGI Symbol;Acc:MGI:1347360]
ENSMUSG00000004366	0	NA	NA	NA	NA	NA	Sst	somatostatin [Source:MGI Symbol;Acc:MGI:98326]
ENSMUSG00000004371	2.88856	-1.22017	2.58401	-0.4722	0.636784	NA	Il11	interleukin 11 [Source:MGI Symbol;Acc:MGI:107613]
ENSMUSG00000004383	1.09803	0.220253	6.08739	0.0361818	0.971137	NA	Large1	LARGE xylosyl- and glucuronyltransferase 1 [Source:MGI Symbol;Acc:MGI:1342270]
ENSMUSG00000004393	20.292	1.76321	0.790701	2.22993	0.0257522	0.24762	Ddx56	DEAD box helicase 56 [Source:MGI Symbol;Acc:MGI:1277172]
ENSMUSG00000004394	49.1265	0.722878	0.529559	1.36506	0.172235	0.763483	Tmed4	transmembrane p24 trafficking protein 4 [Source:MGI Symbol;Acc:MGI:1915070]
ENSMUSG00000004415	3.62168	-0.621502	2.57505	-0.241356	0.809279	NA	Col26a1	collagen, type XXVI, alpha 1 [Source:MGI Symbol;Acc:MGI:2155345]
ENSMUSG00000004446	1.69128	-1.68976	3.32065	-0.508864	0.610847	NA	Bid	BH3 interacting domain death agonist [Source:MGI Symbol;Acc:MGI:108093]
ENSMUSG00000004451	9.70341	-0.138325	1.19034	-0.116206	0.907489	NA	Ralb	v-ral simian leukemia viral oncogene B [Source:MGI Symbol;Acc:MGI:1927244]
ENSMUSG00000004455	0.0626476	0.10105	6.21635	0.0162555	0.987031	NA	Ppp1cc	protein phosphatase 1 catalytic subunit gamma [Source:MGI Symbol;Acc:MGI:104872]
ENSMUSG00000004460	26.0659	1.2641	1.00411	1.25892	0.208058	0.829904	Dnajb11	DnaJ heat shock protein family (Hsp40) member B11 [Source:MGI Symbol;Acc:MGI:1915088]
ENSMUSG00000004462	4.51149	1.19699	2.1373	0.560049	0.575446	NA	Tbccd1	TBCC domain containing 1 [Source:MGI Symbol;Acc:MGI:1917823]
ENSMUSG00000004473	7.63848	2.74959	1.68891	1.62802	0.103521	NA	Clec11a	C-type lectin domain family 11, member a [Source:MGI Symbol;Acc:MGI:1298219]
ENSMUSG00000004500	0.108116	0.410948	6.21079	0.0661668	0.947245	NA	Zfp324	zinc finger protein 324 [Source:MGI Symbol;Acc:MGI:2444641]
ENSMUSG00000004508	56.9784	0.239673	0.400149	0.598959	0.5492	0.999653	Gab2	growth factor receptor bound protein 2-associated protein 2 [Source:MGI Symbol;Acc:MGI:1333854]
ENSMUSG00000004530	1.47412	2.42147	4.69245	0.516035	0.60583	NA	Coro1c	coronin, actin binding protein 1C [Source:MGI Symbol;Acc:MGI:1345964]
ENSMUSG00000004535	390.353	-0.584566	0.137764	-4.24325	2.2e-05	0.000726788	Tax1bp1	Tax1 (human T cell leukemia virus type I) binding protein 1 [Source:MGI Symbol;Acc:MGI:1289308]
ENSMUSG00000004540	1.41765	3.45901	2.66021	1.30027	0.193507	NA	Psg17	pregnancy specific beta-1-glycoprotein 17 [Source:MGI Symbol;Acc:MGI:1347250]
ENSMUSG00000004542	1.45403	-3.79372	3.94403	-0.961889	0.336105	NA	Psg19	pregnancy specific beta-1-glycoprotein 19 [Source:MGI Symbol;Acc:MGI:1347252]
ENSMUSG00000004552	0.308706	1.81685	6.15787	0.295045	0.767959	NA	Ctse	cathepsin E [Source:MGI Symbol;Acc:MGI:107361]
ENSMUSG00000004558	1.27059	0.857765	3.68533	0.232751	0.815955	NA	Ndrg2	N-myc downstream regulated gene 2 [Source:MGI Symbol;Acc:MGI:1352498]
ENSMUSG00000004561	3.47393	-0.516258	2.40629	-0.214546	0.830122	NA	Mettl17	methyltransferase like 17 [Source:MGI Symbol;Acc:MGI:1098577]
ENSMUSG00000004562	5.04428	-2.41294	1.88644	-1.27909	0.200864	NA	Arhgef40	Rho guanine nucleotide exchange factor 40 [Source:MGI Symbol;Acc:MGI:2685515]
ENSMUSG00000004565	1.57994	0.365267	3.69228	0.0989272	0.921196	NA	Pnpla6	patatin-like phospholipase domain containing 6 [Source:MGI Symbol;Acc:MGI:1354723]
ENSMUSG00000004567	1.23431	3.63896	4.65766	0.781286	0.434634	NA	Mcoln1	mucolipin 1 [Source:MGI Symbol;Acc:MGI:1890498]
ENSMUSG00000004568	6.29105	0.00221639	2.04929	0.00108154	0.999137	NA	Arhgef18	Rho/Rac guanine nucleotide exchange factor 18 [Source:MGI Symbol;Acc:MGI:2142567]
ENSMUSG00000004591	26.7936	-0.549096	0.665076	-0.825614	0.409023	0.999653	Pkn2	protein kinase N2 [Source:MGI Symbol;Acc:MGI:109211]
ENSMUSG00000004609	1.96179	-3.74558	3.53916	-1.05832	0.289908	NA	Cd33	CD33 molecule [Source:MGI Symbol;Acc:MGI:99440]
ENSMUSG00000004610	2.16636	-1.24919	2.24826	-0.555626	0.578466	NA	Etfb	electron transferring flavoprotein, beta polypeptide [Source:MGI Symbol;Acc:MGI:106098]
ENSMUSG00000004612	0	NA	NA	NA	NA	NA	Nkg7	natural killer cell group 7 sequence [Source:MGI Symbol;Acc:MGI:1931250]
ENSMUSG00000004626	34.7234	0.181987	1.73941	0.104626	0.916673	0.999653	Stxbp2	syntaxin binding protein 2 [Source:MGI Symbol;Acc:MGI:107370]
ENSMUSG00000004630	0.707601	0.876172	6.15525	0.142346	0.886807	NA	Pcp2	Purkinje cell protein 2 (L7) [Source:MGI Symbol;Acc:MGI:97508]
ENSMUSG00000004631	0.837325	1.00941	5.81017	0.173732	0.862076	NA	Sgce	sarcoglycan, epsilon [Source:MGI Symbol;Acc:MGI:1329042]
ENSMUSG00000004633	163.498	-0.228723	1.68679	-0.135596	0.89214	0.999653	Chn2	chimerin 2 [Source:MGI Symbol;Acc:MGI:1917243]
ENSMUSG00000004637	8.98178	-0.608449	1.42561	-0.4268	0.669525	NA	Wwox	WW domain-containing oxidoreductase [Source:MGI Symbol;Acc:MGI:1931237]
ENSMUSG00000004642	27.565	-0.863327	1.20728	-0.715102	0.474546	0.999653	Slbp	stem-loop binding protein [Source:MGI Symbol;Acc:MGI:108402]
ENSMUSG00000004651	0	NA	NA	NA	NA	NA	Tyr	tyrosinase [Source:MGI Symbol;Acc:MGI:98880]
ENSMUSG00000004654	0	NA	NA	NA	NA	NA	Ghrhr	growth hormone releasing hormone receptor [Source:MGI Symbol;Acc:MGI:95710]
ENSMUSG00000004655	0.330343	-0.485422	6.20222	-0.0782659	0.937617	NA	Aqp1	aquaporin 1 [Source:MGI Symbol;Acc:MGI:103201]
ENSMUSG00000004661	16.8566	-0.632711	1.79294	-0.35289	0.724171	0.999653	Arid3b	AT-rich interaction domain 3B [Source:MGI Symbol;Acc:MGI:1930768]
ENSMUSG00000004665	0.986882	-1.85847	4.34648	-0.427581	0.668956	NA	Cnn2	calponin 2 [Source:MGI Symbol;Acc:MGI:105093]
ENSMUSG00000004667	11.6669	-0.259138	1.85051	-0.140036	0.888632	0.999653	Polr2e	polymerase (RNA) II (DNA directed) polypeptide E [Source:MGI Symbol;Acc:MGI:1913670]
ENSMUSG00000004668	1.61186	1.75267	2.97836	0.588468	0.556218	NA	Abca13	ATP-binding cassette, sub-family A member 13 [Source:MGI Symbol;Acc:MGI:2388707]
ENSMUSG00000004677	7.37273	0.602117	2.2593	0.266506	0.78985	NA	Myo9b	myosin IXb [Source:MGI Symbol;Acc:MGI:106624]
ENSMUSG00000004698	3.69763	-3.57772	3.08188	-1.16089	0.245688	NA	Hdac9	histone deacetylase 9 [Source:MGI Symbol;Acc:MGI:1931221]
ENSMUSG00000004707	0.63856	-1.14733	5.99405	-0.191412	0.848203	NA	Ly9	lymphocyte antigen 9 [Source:MGI Symbol;Acc:MGI:96885]
ENSMUSG00000004709	0	NA	NA	NA	NA	NA	Cd244a	CD244 molecule A [Source:MGI Symbol;Acc:MGI:109294]
ENSMUSG00000004730	0.308039	2.57191	6.14209	0.418734	0.67541	NA	Adgre1	adhesion G protein-coupled receptor E1 [Source:MGI Symbol;Acc:MGI:106912]
ENSMUSG00000004748	4.36936	-1.3123	1.6626	-0.789311	0.42993	NA	Mtfp1	mitochondrial fission process 1 [Source:MGI Symbol;Acc:MGI:1916686]
ENSMUSG00000004768	5.19813	-0.542654	2.32843	-0.233056	0.815718	NA	Rab23	RAB23, member RAS oncogene family [Source:MGI Symbol;Acc:MGI:99833]
ENSMUSG00000004771	25.5718	-0.0667504	1.74932	-0.0381578	0.969562	0.999653	Rab11a	RAB11A, member RAS oncogene family [Source:MGI Symbol;Acc:MGI:1858202]
ENSMUSG00000004788	5.8522	2.72623	1.91678	1.4223	0.15494	NA	Eif2b2	eukaryotic translation initiation factor 2B, subunit 2 beta [Source:MGI Symbol;Acc:MGI:2145118]
ENSMUSG00000004789	23.0905	0.0506687	1.76126	0.0287685	0.977049	0.999653	Dlst	dihydrolipoamide S-succinyltransferase [Source:MGI Symbol;Acc:MGI:1926170]
ENSMUSG00000004791	0.803723	-3.76371	6.11024	-0.615968	0.537916	NA	Pgf	placental growth factor [Source:MGI Symbol;Acc:MGI:105095]
ENSMUSG00000004798	148.024	-1.28955	0.309937	-4.16069	3.17e-05	0.000988851	Ulk2	unc-51 like kinase 2 [Source:MGI Symbol;Acc:MGI:1352758]
ENSMUSG00000004814	0	NA	NA	NA	NA	NA	Ccl24	C-C motif chemokine ligand 24 [Source:MGI Symbol;Acc:MGI:1928953]
ENSMUSG00000004815	0.0771765	0.19935	6.21974	0.0320512	0.974431	NA	Dgkq	diacylglycerol kinase, theta [Source:MGI Symbol;Acc:MGI:102918]
ENSMUSG00000004821	0.153375	-2.26911	6.23278	-0.364061	0.715813	NA	Tmed11	transmembrane p24 trafficking protein 11 [Source:MGI Symbol;Acc:MGI:1914616]
ENSMUSG00000004837	0.450192	-0.927863	6.18703	-0.149969	0.880789	NA	Grap	GRB2-related adaptor protein [Source:MGI Symbol;Acc:MGI:1918770]
ENSMUSG00000004842	1.36854	1.09821	6.11433	0.179612	0.857457	NA	Pou1f1	POU domain, class 1, transcription factor 1 [Source:MGI Symbol;Acc:MGI:97588]
ENSMUSG00000004843	43.6446	-0.717761	1.41081	-0.508757	0.610922	0.999653	Chmp2b	charged multivesicular body protein 2B [Source:MGI Symbol;Acc:MGI:1916192]
ENSMUSG00000004846	4.21061	2.0283	1.88182	1.07784	0.281104	NA	Plod3	procollagen-lysine, 2-oxoglutarate 5-dioxygenase 3 [Source:MGI Symbol;Acc:MGI:1347008]
ENSMUSG00000004849	6.12776	-0.474411	1.76739	-0.268425	0.788372	NA	Ap1s1	adaptor protein complex AP-1, sigma 1 [Source:MGI Symbol;Acc:MGI:1098244]
ENSMUSG00000004864	0.0626476	0.10105	6.21635	0.0162555	0.987031	NA	Mapk13	mitogen-activated protein kinase 13 [Source:MGI Symbol;Acc:MGI:1346864]
ENSMUSG00000004865	207.464	-0.279382	1.68613	-0.165694	0.868398	0.999653	Srpk1	serine/arginine-rich protein specific kinase 1 [Source:MGI Symbol;Acc:MGI:106908]
ENSMUSG00000004872	0.0313238	-0.372134	6.23033	-0.0597294	0.952371	NA	Pax3	paired box 3 [Source:MGI Symbol;Acc:MGI:97487]
ENSMUSG00000004880	13.6717	1.07705	1.19748	0.899431	0.368423	0.999653	Lbr	lamin B receptor [Source:MGI Symbol;Acc:MGI:2138281]
ENSMUSG00000004885	0.306749	-2.79851	6.21922	-0.449977	0.652727	NA	Crabp2	cellular retinoic acid binding protein II [Source:MGI Symbol;Acc:MGI:88491]
ENSMUSG00000004891	0.714884	1.90852	6.11004	0.312359	0.754768	NA	Nes	nestin [Source:MGI Symbol;Acc:MGI:101784]
ENSMUSG00000004892	3.62802	-3.65991	2.23376	-1.63845	0.101327	NA	Bcan	brevican [Source:MGI Symbol;Acc:MGI:1096385]
ENSMUSG00000004894	3.09612	1.07541	3.11668	0.345048	0.730058	NA	Hapln2	hyaluronan and proteoglycan link protein 2 [Source:MGI Symbol;Acc:MGI:2137300]
ENSMUSG00000004895	24.247	0.95535	0.754585	1.26606	0.205492	0.827218	Prcc	papillary renal cell carcinoma (translocation-associated) [Source:MGI Symbol;Acc:MGI:2137738]
ENSMUSG00000004896	2.82611	0.652572	2.39417	0.272567	0.785186	NA	Mettl25b	methyltransferase like 25B [Source:MGI Symbol;Acc:MGI:2387197]
ENSMUSG00000004897	135.352	-0.538303	0.293151	-1.83626	0.0663185	0.451986	Hdgf	heparin binding growth factor [Source:MGI Symbol;Acc:MGI:1194494]
ENSMUSG00000004902	9.7063	2.20027	1.14317	1.92471	0.0542651	NA	Slc25a18	solute carrier family 25 (mitochondrial carrier), member 18 [Source:MGI Symbol;Acc:MGI:1919053]
ENSMUSG00000004929	374.646	0.18475	0.182945	1.00987	0.312559	0.999653	Thop1	thimet oligopeptidase 1 [Source:MGI Symbol;Acc:MGI:1354165]
ENSMUSG00000004931	7.80502	-2.68189	1.84384	-1.45452	0.145803	NA	Apba3	amyloid beta precursor protein binding family A member 3 [Source:MGI Symbol;Acc:MGI:1888527]
ENSMUSG00000004933	0.357946	7.86118	6.12937	1.28254	0.199652	NA	Matk	megakaryocyte-associated tyrosine kinase [Source:MGI Symbol;Acc:MGI:99259]
ENSMUSG00000004934	107.938	0.444016	0.322296	1.37767	0.168307	0.757038	Pias4	protein inhibitor of activated STAT 4 [Source:MGI Symbol;Acc:MGI:2136940]
ENSMUSG00000004936	4.19351	-0.251326	2.07962	-0.120852	0.903808	NA	Map2k1	mitogen-activated protein kinase kinase 1 [Source:MGI Symbol;Acc:MGI:1346866]
ENSMUSG00000004937	74.4969	-0.0164552	1.72638	-0.00953158	0.992395	0.999653	Sgta	small glutamine-rich tetratricopeptide repeat (TPR)-containing, alpha [Source:MGI Symbol;Acc:MGI:1098703]
ENSMUSG00000004939	59.5563	-1.15097	1.71964	-0.669308	0.503299	0.999653	Nmrk2	nicotinamide riboside kinase 2 [Source:MGI Symbol;Acc:MGI:1916814]
ENSMUSG00000004945	23.9259	0.521825	1.08399	0.481394	0.630236	0.999653	Tmem242	transmembrane protein 242 [Source:MGI Symbol;Acc:MGI:1917794]
ENSMUSG00000004947	8.76728	-1.32946	1.89708	-0.70079	0.483434	NA	Dtx2	deltex 2, E3 ubiquitin ligase [Source:MGI Symbol;Acc:MGI:1921448]
ENSMUSG00000004948	0.499659	-3.972	6.1724	-0.643511	0.519893	NA	Zp3	zona pellucida glycoprotein 3 [Source:MGI Symbol;Acc:MGI:99215]
ENSMUSG00000004951	3.29053	1.84649	2.23267	0.827031	0.408219	NA	Hspb1	heat shock protein 1 [Source:MGI Symbol;Acc:MGI:96240]
ENSMUSG00000004952	0.38315	2.4074	6.14607	0.391698	0.695282	NA	Rasa4	RAS p21 protein activator 4 [Source:MGI Symbol;Acc:MGI:1858600]
ENSMUSG00000004961	22.2994	1.60654	1.524	1.05416	0.291812	0.982528	Syt5	synaptotagmin V [Source:MGI Symbol;Acc:MGI:1926368]
ENSMUSG00000004980	127.138	2.77497	1.46597	1.89293	0.0583669	0.418971	Hnrnpa2b1	heterogeneous nuclear ribonucleoprotein A2/B1 [Source:MGI Symbol;Acc:MGI:104819]
ENSMUSG00000004988	0	NA	NA	NA	NA	NA	Fxyd4	FXYD domain-containing ion transport regulator 4 [Source:MGI Symbol;Acc:MGI:1889005]
ENSMUSG00000004994	8.97069	-0.757376	1.91779	-0.394921	0.692901	NA	Yju2b	YJU2 splicing factor homolog B [Source:MGI Symbol;Acc:MGI:1914986]
ENSMUSG00000004996	1.63626	0.598434	3.00902	0.19888	0.842356	NA	Mri1	methylthioribose-1-phosphate isomerase 1 [Source:MGI Symbol;Acc:MGI:1915123]
ENSMUSG00000005034	3.6438	0.299998	2.44255	0.122822	0.902248	NA	Prkacb	protein kinase, cAMP dependent, catalytic, beta [Source:MGI Symbol;Acc:MGI:97594]
ENSMUSG00000005043	4.79274	-0.850548	2.65812	-0.319981	0.748983	NA	Sgsh	N-sulfoglucosamine sulfohydrolase (sulfamidase) [Source:MGI Symbol;Acc:MGI:1350341]
ENSMUSG00000005045	576.254	-0.554395	1.67331	-0.331316	0.740406	0.999653	Chd5	chromodomain helicase DNA binding protein 5 [Source:MGI Symbol;Acc:MGI:3036258]
ENSMUSG00000005054	1.0036	2.32122	6.10675	0.380107	0.703866	NA	Cstb	cystatin B [Source:MGI Symbol;Acc:MGI:109514]
ENSMUSG00000005057	0.830469	1.99187	5.48586	0.363092	0.716536	NA	Sh2b2	SH2B adaptor protein 2 [Source:MGI Symbol;Acc:MGI:1345171]
ENSMUSG00000005069	13.8495	-0.599295	1.82193	-0.328933	0.742206	0.999653	Pex5	peroxisomal biogenesis factor 5 [Source:MGI Symbol;Acc:MGI:1098808]
ENSMUSG00000005078	1.40894	2.72407	4.76385	0.57182	0.567444	NA	Jkamp	JNK1/MAPK8-associated membrane protein [Source:MGI Symbol;Acc:MGI:1915057]
ENSMUSG00000005087	0.0360388	-0.360287	6.23144	-0.0578176	0.953894	NA	Cd44	CD44 antigen [Source:MGI Symbol;Acc:MGI:88338]
ENSMUSG00000005089	4.38184	-0.1033	2.37747	-0.0434496	0.965343	NA	Slc1a2	solute carrier family 1 (glial high affinity glutamate transporter), member 2 [Source:MGI Symbol;Acc:MGI:101931]
ENSMUSG00000005102	3.56895	1.36266	2.63269	0.517595	0.604741	NA	Eif2ak4	eukaryotic translation initiation factor 2 alpha kinase 4 [Source:MGI Symbol;Acc:MGI:1353427]
ENSMUSG00000005103	84.566	0.819819	1.38166	0.59336	0.55294	0.999653	Wdr1	WD repeat domain 1 [Source:MGI Symbol;Acc:MGI:1337100]
ENSMUSG00000005107	0	NA	NA	NA	NA	NA	Slc2a9	solute carrier family 2 (facilitated glucose transporter), member 9 [Source:MGI Symbol;Acc:MGI:2152844]
ENSMUSG00000005124	1.58669	-0.770282	3.09057	-0.249236	0.803178	NA	Ccn4	cellular communication network factor 4 [Source:MGI Symbol;Acc:MGI:1197008]
ENSMUSG00000005125	4.1633	-0.168294	1.86156	-0.0904048	0.927966	NA	Ndrg1	N-myc downstream regulated gene 1 [Source:MGI Symbol;Acc:MGI:1341799]
ENSMUSG00000005131	14.6288	-0.774652	1.00581	-0.770173	0.441197	0.999653	4930550C14Rik	RIKEN cDNA 4930550C14 gene [Source:MGI Symbol;Acc:MGI:1922561]
ENSMUSG00000005142	25.8567	1.08259	0.632781	1.71084	0.0871104	0.52676	Man2b1	mannosidase 2, alpha B1 [Source:MGI Symbol;Acc:MGI:107286]
ENSMUSG00000005148	5.71665	0.346541	1.73507	0.199728	0.841694	NA	Klf5	Kruppel-like transcription factor 5 [Source:MGI Symbol;Acc:MGI:1338056]
ENSMUSG00000005150	3.45628	1.28935	2.48262	0.519352	0.603515	NA	Wdr83	WD repeat domain containing 83 [Source:MGI Symbol;Acc:MGI:1915086]
ENSMUSG00000005161	7.30167	-0.158417	1.99651	-0.0793467	0.936757	NA	Prdx2	peroxiredoxin 2 [Source:MGI Symbol;Acc:MGI:109486]
ENSMUSG00000005198	103.808	0.928779	0.692174	1.34183	0.179652	0.77876	Polr2a	polymerase (RNA) II (DNA directed) polypeptide A [Source:MGI Symbol;Acc:MGI:98086]
ENSMUSG00000005202	4.22281	0.736623	2.03166	0.362573	0.716924	NA	Shbg	sex hormone binding globulin [Source:MGI Symbol;Acc:MGI:98295]
ENSMUSG00000005204	12.199	2.77407	1.69624	1.63542	0.101961	0.580147	Senp3	SUMO/sentrin specific peptidase 3 [Source:MGI Symbol;Acc:MGI:2158736]
ENSMUSG00000005220	21.7788	3.37016	1.46072	2.30719	0.0210443	0.217891	Corin	corin, serine peptidase [Source:MGI Symbol;Acc:MGI:1349451]
ENSMUSG00000005225	8.22184	-1.24676	2.04223	-0.610491	0.541537	NA	Plekha8	pleckstrin homology domain containing, family A (phosphoinositide binding specific) member 8 [Source:MGI Symbol;Acc:MGI:2681164]
ENSMUSG00000005232	0	NA	NA	NA	NA	NA	G6pc2	glucose-6-phosphatase, catalytic, 2 [Source:MGI Symbol;Acc:MGI:1277193]
ENSMUSG00000005233	11.1049	0.107847	1.864	0.0578575	0.953862	NA	Spc25	SPC25, NDC80 kinetochore complex component, homolog (S. cerevisiae) [Source:MGI Symbol;Acc:MGI:1913692]
ENSMUSG00000005237	170.294	-0.397162	1.68444	-0.235782	0.813602	0.999653	Dnah2	dynein, axonemal, heavy chain 2 [Source:MGI Symbol;Acc:MGI:107731]
ENSMUSG00000005251	3.897	1.51609	1.59076	0.953057	0.340561	NA	Ripk4	receptor-interacting serine-threonine kinase 4 [Source:MGI Symbol;Acc:MGI:1919638]
ENSMUSG00000005262	62.9327	-0.00360462	1.70637	-0.00211245	0.998315	0.999653	Ufd1	ubiquitin recognition factor in ER-associated degradation 1 [Source:MGI Symbol;Acc:MGI:109353]
ENSMUSG00000005267	2.69383	2.52056	2.36749	1.06466	0.287032	NA	Zfp287	zinc finger protein 287 [Source:MGI Symbol;Acc:MGI:2176561]
ENSMUSG00000005268	0.13256	1.20576	6.17646	0.195219	0.845222	NA	Prlr	prolactin receptor [Source:MGI Symbol;Acc:MGI:97763]
ENSMUSG00000005299	8.96771	-0.114201	1.07192	-0.106539	0.915155	NA	Letm1	leucine zipper-EF-hand containing transmembrane protein 1 [Source:MGI Symbol;Acc:MGI:1932557]
ENSMUSG00000005312	29.1938	-0.181952	1.74544	-0.104244	0.916975	0.999653	Ubqln1	ubiquilin 1 [Source:MGI Symbol;Acc:MGI:1860276]
ENSMUSG00000005320	1.92068	2.47279	2.9551	0.836788	0.402712	NA	Fgfr4	fibroblast growth factor receptor 4 [Source:MGI Symbol;Acc:MGI:95525]
ENSMUSG00000005338	0	NA	NA	NA	NA	NA	Cadm3	cell adhesion molecule 3 [Source:MGI Symbol;Acc:MGI:2137858]
ENSMUSG00000005339	0	NA	NA	NA	NA	NA	Fcer1a	Fc receptor, IgE, high affinity I, alpha polypeptide [Source:MGI Symbol;Acc:MGI:95494]
ENSMUSG00000005354	7.69101	-0.907212	1.98767	-0.456421	0.648087	NA	Txn2	thioredoxin 2 [Source:MGI Symbol;Acc:MGI:1929468]
ENSMUSG00000005355	0	NA	NA	NA	NA	NA	Casp14	caspase 14 [Source:MGI Symbol;Acc:MGI:1335092]
ENSMUSG00000005357	0.735152	-0.340748	5.68475	-0.0599407	0.952203	NA	Slc1a6	solute carrier family 1 (high affinity aspartate/glutamate transporter), member 6 [Source:MGI Symbol;Acc:MGI:1096331]
ENSMUSG00000005360	0.668739	-0.677527	3.77658	-0.179402	0.857622	NA	Slc1a3	solute carrier family 1 (glial high affinity glutamate transporter), member 3 [Source:MGI Symbol;Acc:MGI:99917]
ENSMUSG00000005362	13.5092	-0.386261	1.83453	-0.21055	0.833239	0.999653	Crbn	cereblon [Source:MGI Symbol;Acc:MGI:1913277]
ENSMUSG00000005364	0.665709	-0.992627	6.07656	-0.163353	0.87024	NA	Il5ra	interleukin 5 receptor, alpha [Source:MGI Symbol;Acc:MGI:96558]
ENSMUSG00000005370	37.8828	0.953172	0.552499	1.7252	0.0844911	0.520371	Msh6	mutS homolog 6 [Source:MGI Symbol;Acc:MGI:1343961]
ENSMUSG00000005371	16.8008	-0.209437	1.82837	-0.114549	0.908803	0.999653	Fbxo11	F-box protein 11 [Source:MGI Symbol;Acc:MGI:2147134]
ENSMUSG00000005373	4.50734	0.549406	1.92455	0.285472	0.775283	NA	Mlxipl	MLX interacting protein-like [Source:MGI Symbol;Acc:MGI:1927999]
ENSMUSG00000005374	30.6886	0.434415	1.74458	0.249009	0.803354	0.999653	Tbl2	transducin (beta)-like 2 [Source:MGI Symbol;Acc:MGI:1351652]
ENSMUSG00000005378	64.7146	-0.0826112	0.727454	-0.113562	0.909585	0.999653	Bud23	BUD23, rRNA methyltransferase and ribosome maturation factor [Source:MGI Symbol;Acc:MGI:1913388]
ENSMUSG00000005397	13.513	0.564042	1.10893	0.508638	0.611006	0.999653	Nid1	nidogen 1 [Source:MGI Symbol;Acc:MGI:97342]
ENSMUSG00000005410	16.6209	0.510068	1.82624	0.2793	0.780014	0.999653	Mcm5	minichromosome maintenance complex component 5 [Source:MGI Symbol;Acc:MGI:103197]
ENSMUSG00000005413	6.14043	-1.2522	1.3798	-0.907526	0.364128	NA	Hmox1	heme oxygenase 1 [Source:MGI Symbol;Acc:MGI:96163]
ENSMUSG00000005417	396.29	-0.708122	0.330603	-2.14191	0.0322005	0.288606	Mprip	myosin phosphatase Rho interacting protein [Source:MGI Symbol;Acc:MGI:1349438]
ENSMUSG00000005442	36.2628	-0.312595	1.75889	-0.177723	0.858941	0.999653	Cic	capicua transcriptional repressor [Source:MGI Symbol;Acc:MGI:1918972]
ENSMUSG00000005447	3.39973	0.960752	2.56279	0.374885	0.707746	NA	Pafah1b3	platelet-activating factor acetylhydrolase, isoform 1b, subunit 3 [Source:MGI Symbol;Acc:MGI:108414]
ENSMUSG00000005465	0.092193	-0.392748	6.22833	-0.0630583	0.94972	NA	Il27ra	interleukin 27 receptor, alpha [Source:MGI Symbol;Acc:MGI:1355318]
ENSMUSG00000005469	49.5702	0.930115	0.528938	1.75846	0.0786695	0.500282	Prkaca	protein kinase, cAMP dependent, catalytic, alpha [Source:MGI Symbol;Acc:MGI:97592]
ENSMUSG00000005470	35.4619	1.25017	0.539165	2.31872	0.0204103	0.214914	Asf1b	anti-silencing function 1B histone chaperone [Source:MGI Symbol;Acc:MGI:1914179]
ENSMUSG00000005474	13.1	-0.593944	1.93405	-0.307099	0.758768	0.999653	Myl10	myosin, light chain 10, regulatory [Source:MGI Symbol;Acc:MGI:1891705]
ENSMUSG00000005481	28.4589	0.42014	0.995332	0.422111	0.672944	0.999653	Ddx39a	DEAD box helicase 39a [Source:MGI Symbol;Acc:MGI:1915528]
ENSMUSG00000005483	152.515	-0.830195	0.368509	-2.25285	0.0242686	0.23965	Dnajb1	DnaJ heat shock protein family (Hsp40) member B1 [Source:MGI Symbol;Acc:MGI:1931874]
ENSMUSG00000005493	8.36091	-0.0311536	2.12465	-0.0146629	0.988301	NA	Msh4	mutS homolog 4 [Source:MGI Symbol;Acc:MGI:1860077]
ENSMUSG00000005501	5.46531	-0.845452	2.19561	-0.385065	0.700189	NA	Usp40	ubiquitin specific peptidase 40 [Source:MGI Symbol;Acc:MGI:2443184]
ENSMUSG00000005503	0	NA	NA	NA	NA	NA	Evx1	even-skipped homeobox 1 [Source:MGI Symbol;Acc:MGI:95461]
ENSMUSG00000005505	11.1838	-0.142361	2.04515	-0.069609	0.944505	0.999653	Kbtbd4	kelch repeat and BTB (POZ) domain containing 4 [Source:MGI Symbol;Acc:MGI:1914386]
ENSMUSG00000005506	10.5722	0.100826	1.9213	0.0524782	0.958148	NA	Celf1	CUGBP, Elav-like family member 1 [Source:MGI Symbol;Acc:MGI:1342295]
ENSMUSG00000005510	7.89907	1.19341	1.03975	1.14779	0.251056	NA	Ndufs3	NADH:ubiquinone oxidoreductase core subunit S3 [Source:MGI Symbol;Acc:MGI:1915599]
ENSMUSG00000005514	4.70326	1.52603	2.27906	0.669587	0.503121	NA	Por	cytochrome p450 oxidoreductase [Source:MGI Symbol;Acc:MGI:97744]
ENSMUSG00000005533	11.1603	2.45929	1.31641	1.86817	0.0617384	0.431196	Igf1r	insulin-like growth factor I receptor [Source:MGI Symbol;Acc:MGI:96433]
ENSMUSG00000005534	17.956	0.115664	0.816766	0.141613	0.887386	0.999653	Insr	insulin receptor [Source:MGI Symbol;Acc:MGI:96575]
ENSMUSG00000005540	0.335498	-3.01578	6.21058	-0.485587	0.62726	NA	Fcer2a	Fc receptor, IgE, low affinity II, alpha polypeptide [Source:MGI Symbol;Acc:MGI:95497]
ENSMUSG00000005547	0	NA	NA	NA	NA	NA	Cyp2a5	cytochrome P450, family 2, subfamily a, polypeptide 5 [Source:MGI Symbol;Acc:MGI:88597]
ENSMUSG00000005553	0.57494	3.23378	6.13485	0.527116	0.598113	NA	Atp4a	ATPase, H+/K+ exchanging, gastric, alpha polypeptide [Source:MGI Symbol;Acc:MGI:88113]
ENSMUSG00000005566	206.99	-0.0184595	0.358776	-0.0514514	0.958966	0.999653	Trim28	tripartite motif-containing 28 [Source:MGI Symbol;Acc:MGI:109274]
ENSMUSG00000005575	39.4777	-1.58354	0.94276	-1.67968	0.0930188	0.547121	Ube2m	ubiquitin-conjugating enzyme E2M [Source:MGI Symbol;Acc:MGI:108278]
ENSMUSG00000005580	2.05313	-0.417633	3.39762	-0.122919	0.902171	NA	Adcy9	adenylate cyclase 9 [Source:MGI Symbol;Acc:MGI:108450]
ENSMUSG00000005583	1.84834	0.159481	3.46061	0.0460847	0.963243	NA	Mef2c	myocyte enhancer factor 2C [Source:MGI Symbol;Acc:MGI:99458]
ENSMUSG00000005609	60.4526	0.958701	0.569118	1.68454	0.0920777	0.545438	Ctr9	CTR9 homolog, Paf1/RNA polymerase II complex component [Source:MGI Symbol;Acc:MGI:109345]
ENSMUSG00000005610	155.107	1.13004	1.47816	0.76449	0.444575	0.999653	Eif4g2	eukaryotic translation initiation factor 4, gamma 2 [Source:MGI Symbol;Acc:MGI:109207]
ENSMUSG00000005611	0.0832766	-2.26911	6.23278	-0.364061	0.715813	NA	Irag1	inositol 1,4,5-triphosphate receptor associated 1 [Source:MGI Symbol;Acc:MGI:1338023]
ENSMUSG00000005615	73.6672	-0.690768	1.27015	-0.543846	0.586547	0.999653	Pcyt1a	phosphate cytidylyltransferase 1, choline, alpha isoform [Source:MGI Symbol;Acc:MGI:88557]
ENSMUSG00000005621	71.0132	-0.978227	0.393101	-2.48849	0.0128287	0.154583	Zfp592	zinc finger protein 592 [Source:MGI Symbol;Acc:MGI:2443541]
ENSMUSG00000005625	95.7664	0.0230014	1.70615	0.0134814	0.989244	0.999653	Psmd4	proteasome (prosome, macropain) 26S subunit, non-ATPase, 4 [Source:MGI Symbol;Acc:MGI:1201670]
ENSMUSG00000005628	2.44006	-0.564667	3.51425	-0.160679	0.872346	NA	Tmod4	tropomodulin 4 [Source:MGI Symbol;Acc:MGI:1355285]
ENSMUSG00000005640	0.0385882	-0.345608	6.23278	-0.0554501	0.95578	NA	Insrr	insulin receptor-related receptor [Source:MGI Symbol;Acc:MGI:1346037]
ENSMUSG00000005649	0	NA	NA	NA	NA	NA	Cabp5	calcium binding protein 5 [Source:MGI Symbol;Acc:MGI:1352746]
ENSMUSG00000005656	8.59113	-0.774886	1.66095	-0.466532	0.640835	NA	Snx6	sorting nexin 6 [Source:MGI Symbol;Acc:MGI:1919433]
ENSMUSG00000005667	11.682	-1.09193	1.38244	-0.789853	0.429614	0.999653	Mthfd2	methylenetetrahydrofolate dehydrogenase (NAD+ dependent), methenyltetrahydrofolate cyclohydrolase [Source:MGI Symbol;Acc:MGI:1338850]
ENSMUSG00000005672	6.03838	0.843105	2.18981	0.385013	0.700228	NA	Kit	KIT proto-oncogene receptor tyrosine kinase [Source:MGI Symbol;Acc:MGI:96677]
ENSMUSG00000005674	0.147089	1.31029	6.17148	0.212314	0.831862	NA	Tomm40l	translocase of outer mitochondrial membrane 40-like [Source:MGI Symbol;Acc:MGI:3589112]
ENSMUSG00000005677	0	NA	NA	NA	NA	NA	Nr1i3	nuclear receptor subfamily 1, group I, member 3 [Source:MGI Symbol;Acc:MGI:1346307]
ENSMUSG00000005681	0.363422	2.57917	6.14309	0.419849	0.674595	NA	Apoa2	apolipoprotein A-II [Source:MGI Symbol;Acc:MGI:88050]
ENSMUSG00000005682	7.17161	0.818899	2.03793	0.401829	0.68781	NA	Pan2	PAN2 poly(A) specific ribonuclease subunit [Source:MGI Symbol;Acc:MGI:1918984]
ENSMUSG00000005683	69.686	0.360567	0.453116	0.79575	0.426178	0.999653	Cs	citrate synthase [Source:MGI Symbol;Acc:MGI:88529]
ENSMUSG00000005686	2.1522	-0.103235	3.31801	-0.0311136	0.975179	NA	Ampd3	adenosine monophosphate deaminase 3 [Source:MGI Symbol;Acc:MGI:1096344]
ENSMUSG00000005687	35.1516	-0.047496	1.73415	-0.0273886	0.97815	0.999653	Bcas2	BCAS2 pre-mRNA processing factor [Source:MGI Symbol;Acc:MGI:1915433]
ENSMUSG00000005696	0.245924	0.452124	6.17067	0.0732699	0.941591	NA	Sh2d1a	SH2 domain containing 1A [Source:MGI Symbol;Acc:MGI:1328352]
ENSMUSG00000005698	13.4314	0.601168	1.0131	0.593394	0.552917	0.999653	Ctcf	CCCTC-binding factor [Source:MGI Symbol;Acc:MGI:109447]
ENSMUSG00000005699	20.6002	-0.774735	1.78455	-0.434134	0.664191	0.999653	Pard6a	par-6 family cell polarity regulator alpha [Source:MGI Symbol;Acc:MGI:1927223]
ENSMUSG00000005705	0.265207	-3.0308	6.21206	-0.487889	0.625628	NA	Agrp	agouti related neuropeptide [Source:MGI Symbol;Acc:MGI:892013]
ENSMUSG00000005716	0	NA	NA	NA	NA	NA	Pvalb	parvalbumin [Source:MGI Symbol;Acc:MGI:97821]
ENSMUSG00000005718	0.508389	1.34228	6.15404	0.218113	0.827341	NA	Tfap4	transcription factor AP4 [Source:MGI Symbol;Acc:MGI:103239]
ENSMUSG00000005732	22.8572	2.12178	1.76892	1.19948	0.230343	0.875361	Ranbp1	RAN binding protein 1 [Source:MGI Symbol;Acc:MGI:96269]
ENSMUSG00000005763	0.633776	-3.2638	5.949	-0.548629	0.58326	NA	Cd247	CD247 antigen [Source:MGI Symbol;Acc:MGI:88334]
ENSMUSG00000005774	0.873802	0.310518	4.11537	0.0754532	0.939854	NA	Rfx5	regulatory factor X, 5 (influences HLA class II expression) [Source:MGI Symbol;Acc:MGI:1858421]
ENSMUSG00000005779	51.4834	0.195301	0.903454	0.216172	0.828854	0.999653	Psmb4	proteasome (prosome, macropain) subunit, beta type 4 [Source:MGI Symbol;Acc:MGI:1098257]
ENSMUSG00000005800	0.232047	-3.00534	6.20905	-0.484026	0.628368	NA	Mmp8	matrix metallopeptidase 8 [Source:MGI Symbol;Acc:MGI:1202395]
ENSMUSG00000005802	85.5652	0.430502	0.754151	0.570842	0.568106	0.999653	Slc30a4	solute carrier family 30 (zinc transporter), member 4 [Source:MGI Symbol;Acc:MGI:1345282]
ENSMUSG00000005803	153.833	-0.560667	1.68188	-0.333358	0.738864	0.999653	Sqor	sulfide quinone oxidoreductase [Source:MGI Symbol;Acc:MGI:1929899]
ENSMUSG00000005804	2.61353	0.482799	2.55652	0.18885	0.85021	NA	Bloc1s6	biogenesis of lysosomal organelles complex-1, subunit 6, pallidin [Source:MGI Symbol;Acc:MGI:1927580]
ENSMUSG00000005813	13.5826	0.285167	1.13254	0.251794	0.8012	0.999653	Metap1	methionyl aminopeptidase 1 [Source:MGI Symbol;Acc:MGI:1922874]
ENSMUSG00000005823	9.97958	-0.216074	1.96982	-0.109692	0.912654	NA	Gpr108	G protein-coupled receptor 108 [Source:MGI Symbol;Acc:MGI:1925558]
ENSMUSG00000005824	2.12739	-2.20283	2.91208	-0.756446	0.449382	NA	Tnfsf14	tumor necrosis factor (ligand) superfamily, member 14 [Source:MGI Symbol;Acc:MGI:1355317]
ENSMUSG00000005836	3.59449	4.1937	2.09765	1.99924	0.0455823	NA	Gata6	GATA binding protein 6 [Source:MGI Symbol;Acc:MGI:107516]
ENSMUSG00000005846	11.7262	0.228883	1.26533	0.180887	0.856456	0.999653	Rsl1d1	ribosomal L1 domain containing 1 [Source:MGI Symbol;Acc:MGI:1913659]
ENSMUSG00000005864	0	NA	NA	NA	NA	NA	Cnga2	cyclic nucleotide gated channel alpha 2 [Source:MGI Symbol;Acc:MGI:108040]
ENSMUSG00000005871	7.57125	-2.51348	1.66794	-1.50694	0.131827	NA	Apc	APC, WNT signaling pathway regulator [Source:MGI Symbol;Acc:MGI:88039]
ENSMUSG00000005873	2.493	4.31575	2.28277	1.89057	0.0586811	NA	Reep5	receptor accessory protein 5 [Source:MGI Symbol;Acc:MGI:1270152]
ENSMUSG00000005881	107.863	0.281606	1.68749	0.166879	0.867465	0.999653	Ergic3	ERGIC and golgi 3 [Source:MGI Symbol;Acc:MGI:1913616]
ENSMUSG00000005882	15.6245	-0.883031	1.80421	-0.489428	0.624538	0.999653	Uqcc1	ubiquinol-cytochrome c reductase complex assembly factor 1 [Source:MGI Symbol;Acc:MGI:1929472]
ENSMUSG00000005883	15.8269	1.76922	1.82922	0.967199	0.333444	0.999653	Spo11	SPO11 initiator of meiotic double stranded breaks [Source:MGI Symbol;Acc:MGI:1349669]
ENSMUSG00000005886	54.9533	0.2477	1.70881	0.144955	0.884747	0.999653	Ncoa2	nuclear receptor coactivator 2 [Source:MGI Symbol;Acc:MGI:1276533]
ENSMUSG00000005891	0.24983	-3.12566	6.20882	-0.503423	0.614667	NA	Prl4a1	prolactin family 4, subfamily a, member 1 [Source:MGI Symbol;Acc:MGI:1206587]
ENSMUSG00000005892	2.36649	-0.810815	2.83142	-0.286364	0.7746	NA	Trh	thyrotropin releasing hormone [Source:MGI Symbol;Acc:MGI:98823]
ENSMUSG00000005893	50.0649	-0.187644	0.487335	-0.385041	0.700207	0.999653	Nr2c2	nuclear receptor subfamily 2, group C, member 2 [Source:MGI Symbol;Acc:MGI:1352466]
ENSMUSG00000005897	5.28659	-0.904902	1.9598	-0.461732	0.644273	NA	Nr2c1	nuclear receptor subfamily 2, group C, member 1 [Source:MGI Symbol;Acc:MGI:1352465]
ENSMUSG00000005899	44.8273	0.0571449	1.77791	0.0321416	0.974359	0.999653	Smpd4	sphingomyelin phosphodiesterase 4 [Source:MGI Symbol;Acc:MGI:1924876]
ENSMUSG00000005907	3.18704	0.940683	3.10198	0.303252	0.761698	NA	Pex1	peroxisomal biogenesis factor 1 [Source:MGI Symbol;Acc:MGI:1918632]
ENSMUSG00000005917	0	NA	NA	NA	NA	NA	Otx1	orthodenticle homeobox 1 [Source:MGI Symbol;Acc:MGI:97450]
ENSMUSG00000005936	5.78186	-0.567842	2.06019	-0.275626	0.782835	NA	Kctd20	potassium channel tetramerisation domain containing 20 [Source:MGI Symbol;Acc:MGI:1914239]
ENSMUSG00000005947	127.805	-0.155114	0.427073	-0.363203	0.716453	0.999653	Itgae	integrin alpha E, epithelial-associated [Source:MGI Symbol;Acc:MGI:1298377]
ENSMUSG00000005949	4.12155	-0.152609	2.21256	-0.0689739	0.94501	NA	Ctns	cystinosis, nephropathic [Source:MGI Symbol;Acc:MGI:1932872]
ENSMUSG00000005950	1.8999	-1.06221	2.86954	-0.370168	0.711258	NA	P2rx5	purinergic receptor P2X, ligand-gated ion channel, 5 [Source:MGI Symbol;Acc:MGI:2137026]
ENSMUSG00000005951	0.716884	0.968595	5.84434	0.165732	0.868368	NA	Shpk	sedoheptulokinase [Source:MGI Symbol;Acc:MGI:1921887]
ENSMUSG00000005952	2.15316	0.115373	2.59347	0.0444859	0.964517	NA	Trpv1	transient receptor potential cation channel, subfamily V, member 1 [Source:MGI Symbol;Acc:MGI:1341787]
ENSMUSG00000005958	1.92407	0.162849	3.10862	0.0523863	0.958221	NA	Ephb3	Eph receptor B3 [Source:MGI Symbol;Acc:MGI:104770]
ENSMUSG00000005968	5.85493	-0.870738	2.20512	-0.39487	0.692939	NA	Tuft1	tuftelin 1 [Source:MGI Symbol;Acc:MGI:109572]
ENSMUSG00000005973	0.483951	2.05409	6.13634	0.334742	0.73782	NA	Rcn1	reticulocalbin 1 [Source:MGI Symbol;Acc:MGI:104559]
ENSMUSG00000005980	0	NA	NA	NA	NA	NA	Dnase1	deoxyribonuclease I [Source:MGI Symbol;Acc:MGI:103157]
ENSMUSG00000005981	79.6829	0.529369	0.368598	1.43617	0.150955	0.715419	Trap1	TNF receptor-associated protein 1 [Source:MGI Symbol;Acc:MGI:1915265]
ENSMUSG00000005982	24.5937	0.37876	1.7541	0.215929	0.829043	0.999653	Naa60	N(alpha)-acetyltransferase 60, NatF catalytic subunit [Source:MGI Symbol;Acc:MGI:1922013]
ENSMUSG00000005983	163.413	-1.09975	0.329594	-3.33668	0.000847848	0.0175865	1700037C18Rik	RIKEN cDNA 1700037C18 gene [Source:MGI Symbol;Acc:MGI:1920511]
ENSMUSG00000005986	0.412947	2.57301	6.15585	0.417978	0.675963	NA	Ankrd13d	ankyrin repeat domain 13 family, member D [Source:MGI Symbol;Acc:MGI:1915673]
ENSMUSG00000005994	0	NA	NA	NA	NA	NA	Tyrp1	tyrosinase-related protein 1 [Source:MGI Symbol;Acc:MGI:98881]
ENSMUSG00000006005	66.2692	-0.118007	1.71719	-0.0687209	0.945212	0.999653	Tpr	translocated promoter region, nuclear basket protein [Source:MGI Symbol;Acc:MGI:1922066]
ENSMUSG00000006007	0	NA	NA	NA	NA	NA	Pdc	phosducin [Source:MGI Symbol;Acc:MGI:98090]
ENSMUSG00000006010	1.50054	-0.533228	4.97748	-0.107128	0.914687	NA	Odr4	odr4 GPCR localization factor homolog [Source:MGI Symbol;Acc:MGI:2385108]
ENSMUSG00000006014	0	NA	NA	NA	NA	NA	Prg4	proteoglycan 4 (megakaryocyte stimulating factor, articular superficial zone protein) [Source:MGI Symbol;Acc:MGI:1891344]
ENSMUSG00000006019	25.0131	0.00103213	1.75726	0.000587348	0.999531	0.999653	Dhx34	DExH-box helicase 34 [Source:MGI Symbol;Acc:MGI:1918973]
ENSMUSG00000006021	2.07622	0.939021	3.56469	0.263423	0.792224	NA	Kptn	kaptin [Source:MGI Symbol;Acc:MGI:1890380]
ENSMUSG00000006024	37.8134	-0.414415	0.536535	-0.772392	0.439882	0.999653	Napa	N-ethylmaleimide sensitive fusion protein attachment protein alpha [Source:MGI Symbol;Acc:MGI:104563]
ENSMUSG00000006050	9.81134	-0.0962025	2.01662	-0.0477049	0.961951	NA	Sra1	steroid receptor RNA activator 1 [Source:MGI Symbol;Acc:MGI:1344414]
ENSMUSG00000006056	0	NA	NA	NA	NA	NA	Calcoco2	calcium binding and coiled-coil domain 2 [Source:MGI Symbol;Acc:MGI:1343177]
ENSMUSG00000006057	0.126318	-0.345662	6.23278	-0.0554588	0.955773	NA	Atp5mc1	ATP synthase membrane subunit c locus 1 [Source:MGI Symbol;Acc:MGI:107653]
ENSMUSG00000006058	4.92016	0.241251	2.16227	0.111573	0.911162	NA	Snf8	SNF8, ESCRT-II complex subunit, homolog (S. cerevisiae) [Source:MGI Symbol;Acc:MGI:1343161]
ENSMUSG00000006095	41.6097	-0.143691	0.480333	-0.29915	0.764826	0.999653	Tbcb	tubulin folding cofactor B [Source:MGI Symbol;Acc:MGI:1913661]
ENSMUSG00000006127	15.951	2.17552	1.58184	1.37531	0.169036	0.757038	Inpp5k	inositol polyphosphate 5-phosphatase K [Source:MGI Symbol;Acc:MGI:1194899]
ENSMUSG00000006134	8.8861	-0.0703483	1.1111	-0.0633141	0.949516	NA	Crkl	v-crk avian sarcoma virus CT10 oncogene homolog-like [Source:MGI Symbol;Acc:MGI:104686]
ENSMUSG00000006143	7.09378	-0.688631	2.06568	-0.333367	0.738857	NA	Upk3bl	uroplakin 3B-like [Source:MGI Symbol;Acc:MGI:1916915]
ENSMUSG00000006154	0	NA	NA	NA	NA	NA	Eps8l1	EPS8-like 1 [Source:MGI Symbol;Acc:MGI:1914675]
ENSMUSG00000006169	35.3405	-0.175311	1.73717	-0.100918	0.919616	0.999653	Clint1	clathrin interactor 1 [Source:MGI Symbol;Acc:MGI:2144243]
ENSMUSG00000006179	0.188965	0.871267	6.20398	0.140437	0.888315	NA	Prss16	serine protease 16 (thymus) [Source:MGI Symbol;Acc:MGI:1859181]
ENSMUSG00000006191	18.2912	-0.623366	0.715735	-0.870946	0.383784	0.999653	Cdkal1	CDK5 regulatory subunit associated protein 1-like 1 [Source:MGI Symbol;Acc:MGI:1921765]
ENSMUSG00000006200	0	NA	NA	NA	NA	NA	Rhox6	reproductive homeobox 6 [Source:MGI Symbol;Acc:MGI:1202888]
ENSMUSG00000006204	0.375587	-1.08068	6.15029	-0.175712	0.86052	NA	Cdcp3	CUB domain containing protein 3 [Source:MGI Symbol;Acc:MGI:1918645]
ENSMUSG00000006205	0.90977	4.13086	6.12764	0.674135	0.500225	NA	Htra1	HtrA serine peptidase 1 [Source:MGI Symbol;Acc:MGI:1929076]
ENSMUSG00000006215	9.14091	-1.32629	1.18633	-1.11798	0.263575	NA	Zbtb17	zinc finger and BTB domain containing 17 [Source:MGI Symbol;Acc:MGI:107410]
ENSMUSG00000006216	0.231529	1.43011	6.16913	0.231817	0.81668	NA	Clcnkb	chloride channel, voltage-sensitive Kb [Source:MGI Symbol;Acc:MGI:1930643]
ENSMUSG00000006218	5.48388	-4.55214	1.93053	-2.35797	0.0183751	NA	Fam131c	family with sequence similarity 131, member C [Source:MGI Symbol;Acc:MGI:2685539]
ENSMUSG00000006219	0	NA	NA	NA	NA	NA	Fblim1	filamin binding LIM protein 1 [Source:MGI Symbol;Acc:MGI:1921452]
ENSMUSG00000006221	30.7595	0.906742	0.759508	1.19385	0.232535	0.879055	Hspb7	heat shock protein family, member 7 (cardiovascular) [Source:MGI Symbol;Acc:MGI:1352494]
ENSMUSG00000006235	1.37865	1.61419	2.80701	0.575057	0.565252	NA	Epor	erythropoietin receptor [Source:MGI Symbol;Acc:MGI:95408]
ENSMUSG00000006241	73.6474	-0.233827	0.343734	-0.680256	0.496342	0.999653	Ccdc159	coiled-coil domain containing 159 [Source:MGI Symbol;Acc:MGI:1914369]
ENSMUSG00000006262	3.41662	-1.8274	2.38272	-0.76694	0.443117	NA	Mob1b	MOB kinase activator 1B [Source:MGI Symbol;Acc:MGI:1915723]
ENSMUSG00000006269	8.15908	0.0107337	1.42197	0.00754845	0.993977	NA	Atp6v1b1	ATPase, H+ transporting, lysosomal V1 subunit B1 [Source:MGI Symbol;Acc:MGI:103285]
ENSMUSG00000006270	0.902099	0.378155	4.73103	0.0799308	0.936292	NA	Vax1	ventral anterior homeobox 1 [Source:MGI Symbol;Acc:MGI:1277163]
ENSMUSG00000006273	25.8446	0.421785	0.720406	0.585483	0.558223	0.999653	Atp6v1b2	ATPase, H+ transporting, lysosomal V1 subunit B2 [Source:MGI Symbol;Acc:MGI:109618]
ENSMUSG00000006276	5.92165	-0.413903	2.10011	-0.197086	0.84376	NA	Eps15l1	epidermal growth factor receptor pathway substrate 15-like 1 [Source:MGI Symbol;Acc:MGI:104582]
ENSMUSG00000006281	23.2034	-0.611026	0.633233	-0.964931	0.334579	0.999653	Tep1	telomerase associated protein 1 [Source:MGI Symbol;Acc:MGI:109573]
ENSMUSG00000006288	2.9717	3.30832	2.78787	1.18669	0.235351	NA	Ttc5	tetratricopeptide repeat domain 5 [Source:MGI Symbol;Acc:MGI:2683584]
ENSMUSG00000006289	5.63979	1.75632	2.23535	0.785703	0.432042	NA	Osgep	O-sialoglycoprotein endopeptidase [Source:MGI Symbol;Acc:MGI:1913496]
ENSMUSG00000006299	255.698	-0.236533	0.612938	-0.385899	0.699571	0.999653	Aamp	angio-associated migratory protein [Source:MGI Symbol;Acc:MGI:107809]
ENSMUSG00000006301	0.880344	2.19725	4.69131	0.468366	0.639523	NA	Tmbim1	transmembrane BAX inhibitor motif containing 1 [Source:MGI Symbol;Acc:MGI:1916910]
ENSMUSG00000006304	37.3678	-0.377569	1.74555	-0.216303	0.828751	0.999653	Arpc2	actin related protein 2/3 complex, subunit 2 [Source:MGI Symbol;Acc:MGI:1923959]
ENSMUSG00000006307	18.8937	-0.297536	1.81904	-0.163567	0.870072	0.999653	Kmt2b	lysine (K)-specific methyltransferase 2B [Source:MGI Symbol;Acc:MGI:109565]
ENSMUSG00000006310	7.20299	-1.54177	2.09706	-0.735207	0.462214	NA	Zbtb32	zinc finger and BTB domain containing 32 [Source:MGI Symbol;Acc:MGI:1891838]
ENSMUSG00000006311	8.92384	-5.94462	1.94557	-3.05547	0.00224709	NA	Etv2	ets variant 2 [Source:MGI Symbol;Acc:MGI:99253]
ENSMUSG00000006313	0.491734	-1.32211	6.17652	-0.214055	0.830504	NA	Upk1a	uroplakin 1A [Source:MGI Symbol;Acc:MGI:98911]
ENSMUSG00000006315	10.3264	0.300533	1.87884	0.159956	0.872915	NA	Tmem147	transmembrane protein 147 [Source:MGI Symbol;Acc:MGI:1915011]
ENSMUSG00000006333	58.8481	0.596433	1.70598	0.349614	0.726629	0.999653	Rps9	ribosomal protein S9 [Source:MGI Symbol;Acc:MGI:1924096]
ENSMUSG00000006335	3.3839	-0.591437	2.37985	-0.248518	0.803733	NA	Tfpt	TCF3 (E2A) fusion partner [Source:MGI Symbol;Acc:MGI:1916964]
ENSMUSG00000006342	0.921467	2.18791	6.10236	0.358535	0.719943	NA	Susd2	sushi domain containing 2 [Source:MGI Symbol;Acc:MGI:1918983]
ENSMUSG00000006344	2.04003	0.652079	2.96618	0.219838	0.825997	NA	Ggt5	gamma-glutamyltransferase 5 [Source:MGI Symbol;Acc:MGI:1346063]
ENSMUSG00000006345	0.996676	0.639529	5.28248	0.121066	0.903639	NA	Ggt1	gamma-glutamyltransferase 1 [Source:MGI Symbol;Acc:MGI:95706]
ENSMUSG00000006356	54.1554	-2.54065	0.420865	-6.03673	1.57e-09	1.03e-07	Crip2	cysteine rich protein 2 [Source:MGI Symbol;Acc:MGI:1915587]
ENSMUSG00000006360	1.34295	-2.41608	6.04715	-0.399541	0.689495	NA	Crip1	cysteine-rich protein 1 [Source:MGI Symbol;Acc:MGI:88501]
ENSMUSG00000006362	0.333597	-1.41509	6.17299	-0.229239	0.818683	NA	Cbfa2t3	CBFA2/RUNX1 translocation partner 3 [Source:MGI Symbol;Acc:MGI:1338013]
ENSMUSG00000006369	5.90057	0.290292	2.23579	0.129839	0.896694	NA	Fbln1	fibulin 1 [Source:MGI Symbol;Acc:MGI:95487]
ENSMUSG00000006373	31.6503	0.787641	0.545931	1.44275	0.149092	0.711281	Pgrmc1	progesterone receptor membrane component 1 [Source:MGI Symbol;Acc:MGI:1858305]
ENSMUSG00000006378	1.47385	1.37634	2.53657	0.5426	0.587405	NA	Gcat	glycine C-acetyltransferase (2-amino-3-ketobutyrate-coenzyme A ligase) [Source:MGI Symbol;Acc:MGI:1349389]
ENSMUSG00000006386	0	NA	NA	NA	NA	NA	Tek	TEK receptor tyrosine kinase [Source:MGI Symbol;Acc:MGI:98664]
ENSMUSG00000006389	0	NA	NA	NA	NA	NA	Mpl	myeloproliferative leukemia virus oncogene [Source:MGI Symbol;Acc:MGI:97076]
ENSMUSG00000006390	15.6346	3.82163	1.83258	2.08538	0.037035	0.318573	Elovl1	ELOVL fatty acid elongase 1 [Source:MGI Symbol;Acc:MGI:1858959]
ENSMUSG00000006392	8.73964	-0.586532	1.99794	-0.293569	0.769087	NA	Med8	mediator complex subunit 8 [Source:MGI Symbol;Acc:MGI:1915269]
ENSMUSG00000006395	0.278881	2.06284	6.15278	0.335269	0.737422	NA	Hyi	hydroxypyruvate isomerase (putative) [Source:MGI Symbol;Acc:MGI:1915430]
ENSMUSG00000006398	80.7425	0.664256	0.576945	1.15133	0.249595	0.908444	Cdc20	cell division cycle 20 [Source:MGI Symbol;Acc:MGI:1859866]
ENSMUSG00000006403	0	NA	NA	NA	NA	NA	Adamts4	ADAM metallopeptidase with thrombospondin type 1 motif 4 [Source:MGI Symbol;Acc:MGI:1339949]
ENSMUSG00000006411	8.39495	-0.956678	1.33753	-0.715257	0.47445	NA	Nectin4	nectin cell adhesion molecule 4 [Source:MGI Symbol;Acc:MGI:1918990]
ENSMUSG00000006412	18.1894	-0.101746	1.86574	-0.0545338	0.95651	0.999653	Pfdn2	prefoldin 2 [Source:MGI Symbol;Acc:MGI:1276111]
ENSMUSG00000006418	9.56215	-0.44517	1.19885	-0.371329	0.710392	NA	Rnf114	ring finger protein 114 [Source:MGI Symbol;Acc:MGI:1933159]
ENSMUSG00000006423	0	NA	NA	NA	NA	NA	Steep1	STING1 ER exit protein 1 [Source:MGI Symbol;Acc:MGI:1924894]
ENSMUSG00000006435	85.1668	-1.14177	1.72362	-0.662425	0.507699	0.999653	Neurl1a	neuralized E3 ubiquitin protein ligase 1A [Source:MGI Symbol;Acc:MGI:1334263]
ENSMUSG00000006442	1.69241	-1.89109	3.95771	-0.477824	0.632775	NA	Srm	spermidine synthase [Source:MGI Symbol;Acc:MGI:102690]
ENSMUSG00000006445	4.97621	1.60409	2.2715	0.706181	0.480076	NA	Epha2	Eph receptor A2 [Source:MGI Symbol;Acc:MGI:95278]
ENSMUSG00000006456	16.4384	3.0584	1.54026	1.98563	0.0470741	0.366315	Rbm14	RNA binding motif protein 14 [Source:MGI Symbol;Acc:MGI:1929092]
ENSMUSG00000006457	5.67808	0.953846	1.48997	0.640179	0.522056	NA	Actn3	actinin alpha 3 [Source:MGI Symbol;Acc:MGI:99678]
ENSMUSG00000006463	0.873982	1.29695	5.54749	0.233791	0.815147	NA	Zdhhc24	zinc finger, DHHC domain containing 24 [Source:MGI Symbol;Acc:MGI:1917855]
ENSMUSG00000006464	15.2682	3.02149	0.991662	3.04689	0.00231219	0.0415658	Bbs1	Bardet-Biedl syndrome 1 [Source:MGI Symbol;Acc:MGI:1277215]
ENSMUSG00000006469	17.8349	-0.820297	1.81136	-0.452862	0.650648	0.999653	Slc34a3	solute carrier family 34 (sodium phosphate), member 3 [Source:MGI Symbol;Acc:MGI:2159410]
ENSMUSG00000006471	1.51083	1.53543	3.74515	0.409979	0.681821	NA	Ndor1	NADPH dependent diflavin oxidoreductase 1 [Source:MGI Symbol;Acc:MGI:1926047]
ENSMUSG00000006476	7.98824	-1.46176	2.24177	-0.652056	0.514365	NA	Nsmf	NMDA receptor synaptonuclear signaling and neuronal migration factor [Source:MGI Symbol;Acc:MGI:1861755]
ENSMUSG00000006488	0	NA	NA	NA	NA	NA	Prl7a1	prolactin family 7, subfamily a, member 1 [Source:MGI Symbol;Acc:MGI:1206572]
ENSMUSG00000006490	0	NA	NA	NA	NA	NA	Prl8a9	prolactin family8, subfamily a, member 9 [Source:MGI Symbol;Acc:MGI:1914560]
ENSMUSG00000006494	1.92706	-0.229488	4.08833	-0.0561325	0.955236	NA	Pdk1	pyruvate dehydrogenase kinase, isoenzyme 1 [Source:MGI Symbol;Acc:MGI:1926119]
ENSMUSG00000006498	13.4922	0.429537	1.9517	0.220083	0.825807	0.999653	Ptbp1	polypyrimidine tract binding protein 1 [Source:MGI Symbol;Acc:MGI:97791]
ENSMUSG00000006517	0.472989	-0.244926	6.14298	-0.0398709	0.968196	NA	Mvd	mevalonate (diphospho) decarboxylase [Source:MGI Symbol;Acc:MGI:2179327]
ENSMUSG00000006519	1.62597	1.4973	3.49887	0.427939	0.668695	NA	Cyba	cytochrome b-245, alpha polypeptide [Source:MGI Symbol;Acc:MGI:1316658]
ENSMUSG00000006522	1.33463	0.488319	4.99148	0.0978306	0.922067	NA	Itih3	inter-alpha trypsin inhibitor, heavy chain 3 [Source:MGI Symbol;Acc:MGI:96620]
ENSMUSG00000006526	0.554496	1.1171	6.12928	0.182256	0.855382	NA	Stimate	STIM activating enhancer [Source:MGI Symbol;Acc:MGI:1921500]
ENSMUSG00000006527	59.9079	0.857448	0.377289	2.27266	0.0230468	0.232795	Sfmbt1	Scm-like with four mbt domains 1 [Source:MGI Symbol;Acc:MGI:1859609]
ENSMUSG00000006529	0	NA	NA	NA	NA	NA	Itih1	inter-alpha trypsin inhibitor, heavy chain 1 [Source:MGI Symbol;Acc:MGI:96618]
ENSMUSG00000006538	0	NA	NA	NA	NA	NA	Ihh	Indian hedgehog [Source:MGI Symbol;Acc:MGI:96533]
ENSMUSG00000006542	0.388881	-0.707386	6.21906	-0.113745	0.90944	NA	Prkag3	protein kinase, AMP-activated, gamma 3 non-catalytic subunit [Source:MGI Symbol;Acc:MGI:1891343]
ENSMUSG00000006546	0.0313238	-0.372134	6.23033	-0.0597294	0.952371	NA	Cryba2	crystallin, beta A2 [Source:MGI Symbol;Acc:MGI:104336]
ENSMUSG00000006567	7.82357	-0.402011	1.246	-0.322641	0.746967	NA	Atp7b	ATPase, Cu++ transporting, beta polypeptide [Source:MGI Symbol;Acc:MGI:103297]
ENSMUSG00000006570	0	NA	NA	NA	NA	NA	Defb2	defensin beta 2 [Source:MGI Symbol;Acc:MGI:1338754]
ENSMUSG00000006574	25.5764	2.58409	1.6078	1.60722	0.108006	0.600763	Slc4a1	solute carrier family 4 (anion exchanger), member 1 [Source:MGI Symbol;Acc:MGI:109393]
ENSMUSG00000006575	68.1399	-0.760535	1.69917	-0.447593	0.654447	0.999653	Rundc3a	RUN domain containing 3A [Source:MGI Symbol;Acc:MGI:1858752]
ENSMUSG00000006576	0.0313238	-0.372134	6.23033	-0.0597294	0.952371	NA	Slc4a3	solute carrier family 4 (anion exchanger), member 3 [Source:MGI Symbol;Acc:MGI:109350]
ENSMUSG00000006585	1.88746	2.13141	4.67635	0.455786	0.648544	NA	Cdt1	chromatin licensing and DNA replication factor 1 [Source:MGI Symbol;Acc:MGI:1914427]
ENSMUSG00000006586	4.33359	-2.55205	2.40005	-1.06333	0.287633	NA	Runx1t1	RUNX1 translocation partner 1 [Source:MGI Symbol;Acc:MGI:104793]
ENSMUSG00000006587	1.93955	5.83104	2.49973	2.33267	0.0196653	NA	Snai3	snail family zinc finger 3 [Source:MGI Symbol;Acc:MGI:1353563]
ENSMUSG00000006589	29.1598	-0.505706	1.75991	-0.287348	0.773846	0.999653	Aprt	adenine phosphoribosyl transferase [Source:MGI Symbol;Acc:MGI:88061]
ENSMUSG00000006599	29.3537	0.905339	0.818283	1.10639	0.268559	0.942948	Gtf2h1	general transcription factor II H, polypeptide 1 [Source:MGI Symbol;Acc:MGI:1277216]
ENSMUSG00000006611	3.5336	0.215365	2.66445	0.0808291	0.935578	NA	Hfe	homeostatic iron regulator [Source:MGI Symbol;Acc:MGI:109191]
ENSMUSG00000006638	0.092193	-0.392748	6.22833	-0.0630583	0.94972	NA	Abhd1	abhydrolase domain containing 1 [Source:MGI Symbol;Acc:MGI:1931013]
ENSMUSG00000006641	5.32104	-0.741714	2.05366	-0.361167	0.717975	NA	Slc5a6	solute carrier family 5 (sodium-dependent vitamin transporter), member 6 [Source:MGI Symbol;Acc:MGI:2660847]
ENSMUSG00000006642	1.51285	0.843036	3.54694	0.23768	0.812129	NA	Tcf23	transcription factor 23 [Source:MGI Symbol;Acc:MGI:1934960]
ENSMUSG00000006649	0	NA	NA	NA	NA	NA	Nphs1	nephrosis 1, nephrin [Source:MGI Symbol;Acc:MGI:1859637]
ENSMUSG00000006651	8.07252	0.996206	2.12917	0.467885	0.639867	NA	Aplp1	amyloid beta precursor like protein 1 [Source:MGI Symbol;Acc:MGI:88046]
ENSMUSG00000006673	71.4134	-0.371182	1.72095	-0.215685	0.829233	0.999653	Qrich1	glutamine-rich 1 [Source:MGI Symbol;Acc:MGI:1916482]
ENSMUSG00000006675	3.08241	2.74321	1.80103	1.52314	0.127725	NA	P4htm	prolyl 4-hydroxylase, transmembrane (endoplasmic reticulum) [Source:MGI Symbol;Acc:MGI:1921693]
ENSMUSG00000006676	104.247	0.0580073	1.68751	0.0343746	0.972578	0.999653	Usp19	ubiquitin specific peptidase 19 [Source:MGI Symbol;Acc:MGI:1918722]
ENSMUSG00000006678	6.32247	-3.25679	1.31696	-2.47296	0.0133999	NA	Pola1	polymerase (DNA directed), alpha 1 [Source:MGI Symbol;Acc:MGI:99660]
ENSMUSG00000006699	9.23743	-2.58188	1.77468	-1.45484	0.145714	NA	Cdc42	cell division cycle 42 [Source:MGI Symbol;Acc:MGI:106211]
ENSMUSG00000006705	38.0867	-0.526689	0.628461	-0.838062	0.401996	0.999653	Pknox1	Pbx/knotted 1 homeobox [Source:MGI Symbol;Acc:MGI:1201409]
ENSMUSG00000006711	0.884881	-0.105404	5.72157	-0.0184223	0.985302	NA	D130043K22Rik	RIKEN cDNA D130043K22 gene [Source:MGI Symbol;Acc:MGI:3036268]
ENSMUSG00000006715	13.6734	0.796985	1.82325	0.437123	0.662022	0.999653	Gmnn	geminin [Source:MGI Symbol;Acc:MGI:1927344]
ENSMUSG00000006717	9.21455	-0.533001	1.58709	-0.335836	0.736995	NA	Acot13	acyl-CoA thioesterase 13 [Source:MGI Symbol;Acc:MGI:1914084]
ENSMUSG00000006720	1.377	-4.51238	4.73315	-0.953358	0.340409	NA	Zfp184	zinc finger protein 184 (Kruppel-like) [Source:MGI Symbol;Acc:MGI:1922244]
ENSMUSG00000006724	0	NA	NA	NA	NA	NA	Cyp27b1	cytochrome P450, family 27, subfamily b, polypeptide 1 [Source:MGI Symbol;Acc:MGI:1098274]
ENSMUSG00000006728	13.5701	0.0103707	0.953553	0.0108759	0.991322	0.999653	Cdk4	cyclin dependent kinase 4 [Source:MGI Symbol;Acc:MGI:88357]
ENSMUSG00000006731	9.37805	-0.118527	2.03707	-0.0581849	0.953601	NA	B4galnt1	beta-1,4-N-acetyl-galactosaminyl transferase 1 [Source:MGI Symbol;Acc:MGI:1342057]
ENSMUSG00000006732	0.948797	1.44243	4.57056	0.315591	0.752313	NA	Mettl1	methyltransferase 1, tRNA methylguanosine [Source:MGI Symbol;Acc:MGI:1339986]
ENSMUSG00000006736	2.39564	2.32667	2.3923	0.972566	0.330769	NA	Tspan31	tetraspanin 31 [Source:MGI Symbol;Acc:MGI:1914375]
ENSMUSG00000006740	9.12864	2.8996	1.61183	1.79895	0.0720262	NA	Kif5b	kinesin family member 5B [Source:MGI Symbol;Acc:MGI:1098268]
ENSMUSG00000006763	6.71055	-0.755545	1.52661	-0.494917	0.620659	NA	Saal1	serum amyloid A-like 1 [Source:MGI Symbol;Acc:MGI:1926185]
ENSMUSG00000006764	4.41951	-5.93198	2.11316	-2.80717	0.00499793	NA	Tph2	tryptophan hydroxylase 2 [Source:MGI Symbol;Acc:MGI:2651811]
ENSMUSG00000006777	1.04228	-3.54511	5.07334	-0.698772	0.484694	NA	Krt23	keratin 23 [Source:MGI Symbol;Acc:MGI:2148866]
ENSMUSG00000006782	1.40405	2.30243	3.7384	0.615887	0.537969	NA	Cnp	2',3'-cyclic nucleotide 3' phosphodiesterase [Source:MGI Symbol;Acc:MGI:88437]
ENSMUSG00000006784	86.0176	-1.1757	1.7107	-0.687262	0.491917	0.999653	Odad4	outer dynein arm complex subunit 4 [Source:MGI Symbol;Acc:MGI:1921657]
ENSMUSG00000006800	8.61974	-0.128935	2.00244	-0.064389	0.94866	NA	Sulf2	sulfatase 2 [Source:MGI Symbol;Acc:MGI:1919293]
ENSMUSG00000006818	32.4999	-1.12535	1.06644	-1.05524	0.291318	0.981435	Sod2	superoxide dismutase 2, mitochondrial [Source:MGI Symbol;Acc:MGI:98352]
ENSMUSG00000006850	4.0723	0.851009	1.82473	0.466375	0.640947	NA	Tmco6	transmembrane and coiled-coil domains 6 [Source:MGI Symbol;Acc:MGI:1919233]
ENSMUSG00000006906	8.79132	0.746792	1.64755	0.453274	0.650351	NA	Stambp	STAM binding protein [Source:MGI Symbol;Acc:MGI:1917777]
ENSMUSG00000006920	4.59585	1.65262	2.36617	0.698438	0.484903	NA	Ezh1	enhancer of zeste 1 polycomb repressive complex 2 subunit [Source:MGI Symbol;Acc:MGI:1097695]
ENSMUSG00000006930	29.3297	-1.33152	0.889916	-1.49623	0.134594	0.668468	Hap1	huntingtin-associated protein 1 [Source:MGI Symbol;Acc:MGI:1261831]
ENSMUSG00000006931	4.65466	1.91526	1.55921	1.22835	0.219315	NA	P3h4	prolyl 3-hydroxylase family member 4 (non-enzymatic) [Source:MGI Symbol;Acc:MGI:1913430]
ENSMUSG00000006932	37.9056	0.555973	1.72145	0.322969	0.746719	0.999653	Ctnnb1	catenin beta 1 [Source:MGI Symbol;Acc:MGI:88276]
ENSMUSG00000006941	105.976	0.199328	0.387198	0.514796	0.606696	0.999653	Eif1b	eukaryotic translation initiation factor 1B [Source:MGI Symbol;Acc:MGI:1916219]
ENSMUSG00000006948	0	NA	NA	NA	NA	NA	Klk4	kallikrein related-peptidase 4 (prostase, enamel matrix, prostate) [Source:MGI Symbol;Acc:MGI:1861379]
ENSMUSG00000006958	0	NA	NA	NA	NA	NA	Chrd	chordin [Source:MGI Symbol;Acc:MGI:1313268]
ENSMUSG00000006998	103.39	0.161096	1.70265	0.0946151	0.924621	0.999653	Psmd2	proteasome (prosome, macropain) 26S subunit, non-ATPase, 2 [Source:MGI Symbol;Acc:MGI:1096584]
ENSMUSG00000007021	0	NA	NA	NA	NA	NA	Syngr3	synaptogyrin 3 [Source:MGI Symbol;Acc:MGI:1341881]
ENSMUSG00000007029	1222.7	-0.66626	1.6703	-0.398887	0.689977	0.999653	Vars1	valyl-tRNA synthetase 1 [Source:MGI Symbol;Acc:MGI:90675]
ENSMUSG00000007030	1.76054	0.152967	2.78455	0.0549342	0.956191	NA	Vwa7	von Willebrand factor A domain containing 7 [Source:MGI Symbol;Acc:MGI:1306798]
ENSMUSG00000007033	3481.92	-1.04967	0.0991361	-10.5882	3.38e-26	5.99e-24	Hspa1l	heat shock protein 1-like [Source:MGI Symbol;Acc:MGI:96231]
ENSMUSG00000007034	0	NA	NA	NA	NA	NA	Slc44a4	solute carrier family 44, member 4 [Source:MGI Symbol;Acc:MGI:1917379]
ENSMUSG00000007035	2.51499	-2.42444	2.48573	-0.975343	0.32939	NA	Msh5	mutS homolog 5 [Source:MGI Symbol;Acc:MGI:1329021]
ENSMUSG00000007036	14.1075	-0.834892	1.84923	-0.451482	0.651642	0.999653	Abhd16a	abhydrolase domain containing 16A [Source:MGI Symbol;Acc:MGI:99476]
ENSMUSG00000007038	0.376645	-3.38945	6.20205	-0.546505	0.584719	NA	Neu1	neuraminidase 1 [Source:MGI Symbol;Acc:MGI:97305]
ENSMUSG00000007039	3.66879	2.08173	2.36022	0.882004	0.377775	NA	Ddah2	DDAH family member 2, ADMA independent [Source:MGI Symbol;Acc:MGI:1859016]
ENSMUSG00000007041	14.4776	0.942027	1.42095	0.662958	0.507357	0.999653	Clic1	chloride intracellular channel 1 [Source:MGI Symbol;Acc:MGI:2148924]
ENSMUSG00000007050	17.9563	0.096673	1.79452	0.0538713	0.957038	0.999653	Lsm2	LSM2 homolog, U6 small nuclear RNA and mRNA degradation associated [Source:MGI Symbol;Acc:MGI:90676]
ENSMUSG00000007080	28.4595	-0.120545	0.548414	-0.219808	0.826021	0.999653	Pole	polymerase (DNA directed), epsilon [Source:MGI Symbol;Acc:MGI:1196391]
ENSMUSG00000007097	28.8913	0.848688	0.968605	0.876196	0.380924	0.999653	Atp1a2	ATPase, Na+/K+ transporting, alpha 2 polypeptide [Source:MGI Symbol;Acc:MGI:88106]
ENSMUSG00000007107	3456.1	0.088852	0.087105	1.02006	0.307702	0.999653	Atp1a4	ATPase, Na+/K+ transporting, alpha 4 polypeptide [Source:MGI Symbol;Acc:MGI:1351335]
ENSMUSG00000007122	2.81969	-2.7753	2.47628	-1.12076	0.262392	NA	Casq1	calsequestrin 1 [Source:MGI Symbol;Acc:MGI:1309468]
ENSMUSG00000007207	1.57525	0.442284	4.85101	0.0911735	0.927355	NA	Stx1a	syntaxin 1A (brain) [Source:MGI Symbol;Acc:MGI:109355]
ENSMUSG00000007209	0.184386	0.0711467	6.21527	0.0114471	0.990867	NA	Ceacam9	CEA cell adhesion molecule 9 [Source:MGI Symbol;Acc:MGI:1347247]
ENSMUSG00000007216	0.578793	1.50725	5.8897	0.255913	0.798018	NA	Zfp775	zinc finger protein 775 [Source:MGI Symbol;Acc:MGI:2683557]
ENSMUSG00000007279	8.93459	-0.773278	2.37146	-0.326076	0.744367	NA	Scube2	signal peptide, CUB domain, EGF-like 2 [Source:MGI Symbol;Acc:MGI:1928765]
ENSMUSG00000007338	14.9721	0.811312	0.982594	0.825683	0.408984	0.999653	Mrpl49	mitochondrial ribosomal protein L49 [Source:MGI Symbol;Acc:MGI:108180]
ENSMUSG00000007379	1.16586	-0.583882	4.20701	-0.138788	0.889618	NA	Dennd2c	DENN domain containing 2C [Source:MGI Symbol;Acc:MGI:3036254]
ENSMUSG00000007411	9.90366	-0.937561	1.90086	-0.493229	0.621851	NA	Mark3	MAP/microtubule affinity regulating kinase 3 [Source:MGI Symbol;Acc:MGI:1341865]
ENSMUSG00000007415	43.1187	-0.964495	0.603706	-1.59762	0.110127	0.605818	Gatad1	GATA zinc finger domain containing 1 [Source:MGI Symbol;Acc:MGI:1914460]
ENSMUSG00000007440	5.16655	2.89501	2.35989	1.22675	0.219915	NA	Pcdha10	protocadherin alpha 10 [Source:MGI Symbol;Acc:MGI:1298408]
ENSMUSG00000007457	7.66428	-0.45535	1.99616	-0.228113	0.819558	NA	2310003L06Rik	RIKEN cDNA 2310003L06 gene [Source:MGI Symbol;Acc:MGI:1921498]
ENSMUSG00000007458	2.54391	-0.574319	2.75561	-0.208418	0.834902	NA	M6pr	mannose-6-phosphate receptor, cation dependent [Source:MGI Symbol;Acc:MGI:96904]
ENSMUSG00000007476	0	NA	NA	NA	NA	NA	Lrrc8a	leucine rich repeat containing 8A VRAC subunit A [Source:MGI Symbol;Acc:MGI:2652847]
ENSMUSG00000007480	0.378953	0.536529	6.20625	0.0864497	0.931109	NA	Mc5r	melanocortin 5 receptor [Source:MGI Symbol;Acc:MGI:99420]
ENSMUSG00000007564	10.1552	3.19275	1.69199	1.88698	0.0591634	NA	Ppp2r1a	protein phosphatase 2, regulatory subunit A, alpha [Source:MGI Symbol;Acc:MGI:1926334]
ENSMUSG00000007570	1.32996	0.263229	4.6327	0.0568197	0.954689	NA	Fance	Fanconi anemia, complementation group E [Source:MGI Symbol;Acc:MGI:1920025]
ENSMUSG00000007589	18.1857	-0.408158	1.85974	-0.21947	0.826284	0.999653	Tinf2	Terf1 (TRF1)-interacting nuclear factor 2 [Source:MGI Symbol;Acc:MGI:107246]
ENSMUSG00000007591	18.3702	-0.244581	1.84826	-0.132331	0.894723	0.999653	Tssk4	testis-specific serine kinase 4 [Source:MGI Symbol;Acc:MGI:1918349]
ENSMUSG00000007594	11.1608	-1.51512	1.87803	-0.806758	0.419806	0.999653	Hapln4	hyaluronan and proteoglycan link protein 4 [Source:MGI Symbol;Acc:MGI:2679531]
ENSMUSG00000007603	4.13141	0.755391	2.20317	0.342866	0.731699	NA	Dus3l	dihydrouridine synthase 3 like [Source:MGI Symbol;Acc:MGI:2147092]
ENSMUSG00000007610	1.13539	4.35275	6.12676	0.71045	0.477425	NA	Gtpbp3	GTP binding protein 3 [Source:MGI Symbol;Acc:MGI:1917609]
ENSMUSG00000007613	13.0354	0.66681	0.925068	0.720823	0.471018	0.999653	Tgfbr1	transforming growth factor, beta receptor I [Source:MGI Symbol;Acc:MGI:98728]
ENSMUSG00000007617	3.63225	-3.22766	2.49789	-1.29216	0.196303	NA	Homer1	homer scaffolding protein 1 [Source:MGI Symbol;Acc:MGI:1347345]
ENSMUSG00000007646	9.19971	0.656024	1.18919	0.551657	0.581183	NA	Rad51c	RAD51 paralog C [Source:MGI Symbol;Acc:MGI:2150020]
ENSMUSG00000007653	0.219267	1.24358	6.1804	0.201213	0.840532	NA	Gabrb2	gamma-aminobutyric acid type A receptor subunit beta 2 [Source:MGI Symbol;Acc:MGI:95620]
ENSMUSG00000007655	0.180194	0.884092	6.19531	0.142703	0.886524	NA	Cav1	caveolin 1, caveolae protein [Source:MGI Symbol;Acc:MGI:102709]
ENSMUSG00000007656	20.8753	-0.178695	1.77192	-0.100848	0.919671	0.999653	Arpp19	cAMP-regulated phosphoprotein 19 [Source:MGI Symbol;Acc:MGI:1891691]
ENSMUSG00000007659	8.62914	1.21507	1.92121	0.63245	0.527093	NA	Bcl2l1	BCL2-like 1 [Source:MGI Symbol;Acc:MGI:88139]
ENSMUSG00000007670	36.2377	1.07347	0.511252	2.09969	0.0357562	0.31146	Khsrp	KH-type splicing regulatory protein [Source:MGI Symbol;Acc:MGI:1336214]
ENSMUSG00000007682	44.2734	-2.94709	0.857156	-3.43822	0.000585561	0.0127426	Dio2	deiodinase, iodothyronine, type II [Source:MGI Symbol;Acc:MGI:1338833]
ENSMUSG00000007721	131.249	-0.454469	0.3427	-1.32614	0.184793	0.788964	Ccdc124	coiled-coil domain containing 124 [Source:MGI Symbol;Acc:MGI:1916403]
ENSMUSG00000007739	193.32	-0.0699402	1.68463	-0.0415166	0.966884	0.999653	Cct4	chaperonin containing TCP1 subunit 4 [Source:MGI Symbol;Acc:MGI:104689]
ENSMUSG00000007777	6.00212	0.00108189	2.08696	0.000518407	0.999586	NA	Trappc2b	trafficking protein particle complex 2B [Source:MGI Symbol;Acc:MGI:1913300]
ENSMUSG00000007783	14.93	0.010203	1.8574	0.00549313	0.995617	0.999653	Cpt1c	carnitine palmitoyltransferase 1c [Source:MGI Symbol;Acc:MGI:2446526]
ENSMUSG00000007805	0	NA	NA	NA	NA	NA	Twist2	twist basic helix-loop-helix transcription factor 2 [Source:MGI Symbol;Acc:MGI:104685]
ENSMUSG00000007812	2.83615	0.337001	2.76562	0.121854	0.903015	NA	Zfp655	zinc finger protein 655 [Source:MGI Symbol;Acc:MGI:1919861]
ENSMUSG00000007815	13.0689	0.143326	0.89604	0.159955	0.872916	0.999653	Rhoa	ras homolog family member A [Source:MGI Symbol;Acc:MGI:1096342]
ENSMUSG00000007817	7.77742	0.507045	2.05847	0.246322	0.805433	NA	Zmiz1	zinc finger, MIZ-type containing 1 [Source:MGI Symbol;Acc:MGI:3040693]
ENSMUSG00000007827	2.52739	-1.82979	1.94259	-0.941934	0.346226	NA	Ankrd26	ankyrin repeat domain 26 [Source:MGI Symbol;Acc:MGI:1917887]
ENSMUSG00000007833	3.27879	1.07919	2.953	0.365455	0.714772	NA	Aldh16a1	aldehyde dehydrogenase 16 family, member A1 [Source:MGI Symbol;Acc:MGI:1916998]
ENSMUSG00000007836	76.3503	-0.779754	0.362052	-2.15371	0.031263	0.283469	Hnrnpa0	heterogeneous nuclear ribonucleoprotein A0 [Source:MGI Symbol;Acc:MGI:1924384]
ENSMUSG00000007837	2.38962	0.787796	3.44134	0.228921	0.81893	NA	Prrg2	proline-rich Gla (G-carboxyglutamic acid) polypeptide 2 [Source:MGI Symbol;Acc:MGI:1929596]
ENSMUSG00000007850	58.8313	-1.09034	1.76086	-0.619211	0.535777	0.999653	Hnrnph1	heterogeneous nuclear ribonucleoprotein H1 [Source:MGI Symbol;Acc:MGI:1891925]
ENSMUSG00000007867	112.353	0.1465	1.68784	0.0867974	0.930833	0.999653	Ift43	intraflagellar transport 43 [Source:MGI Symbol;Acc:MGI:1923661]
ENSMUSG00000007872	0.200624	-0.141406	6.18377	-0.0228673	0.981756	NA	Id3	inhibitor of DNA binding 3 [Source:MGI Symbol;Acc:MGI:96398]
ENSMUSG00000007877	0.265207	-3.0308	6.21206	-0.487889	0.625628	NA	Tcap	titin-cap [Source:MGI Symbol;Acc:MGI:1330233]
ENSMUSG00000007880	43.5318	-0.158692	0.559195	-0.283786	0.776575	0.999653	Arid1a	AT-rich interaction domain 1A [Source:MGI Symbol;Acc:MGI:1935147]
ENSMUSG00000007888	7.01279	1.65117	2.27926	0.724434	0.468799	NA	Crlf1	cytokine receptor-like factor 1 [Source:MGI Symbol;Acc:MGI:1340030]
ENSMUSG00000007891	3.42212	2.31672	2.7948	0.828941	0.407138	NA	Ctsd	cathepsin D [Source:MGI Symbol;Acc:MGI:88562]
ENSMUSG00000007892	230.996	-1.56325	0.340524	-4.59072	4.42e-06	0.000166037	Rplp1	ribosomal protein lateral stalk subunit P1 [Source:MGI Symbol;Acc:MGI:1927099]
ENSMUSG00000007907	3093.61	-0.374041	0.0953237	-3.92391	8.71e-05	0.00236995	Cabs1	calcium binding protein, spermatid specific 1 [Source:MGI Symbol;Acc:MGI:1918227]
ENSMUSG00000007908	0.714751	-1.3779	5.77461	-0.238613	0.811406	NA	Hmgcll1	3-hydroxymethyl-3-methylglutaryl-Coenzyme A lyase-like 1 [Source:MGI Symbol;Acc:MGI:2446108]
ENSMUSG00000007944	45.4824	-1.69725	1.72951	-0.981343	0.326423	0.999653	Ttc9b	tetratricopeptide repeat domain 9B [Source:MGI Symbol;Acc:MGI:1920282]
ENSMUSG00000007946	0.849628	-5.86458	6.11879	-0.958455	0.337834	NA	Phox2a	paired-like homeobox 2a [Source:MGI Symbol;Acc:MGI:106633]
ENSMUSG00000007950	131.351	-1.37387	0.250897	-5.47584	4.35e-08	2.23e-06	Abhd8	abhydrolase domain containing 8 [Source:MGI Symbol;Acc:MGI:1918946]
ENSMUSG00000007987	31.5875	0.0824396	1.7458	0.0472218	0.962336	0.999653	Ift22	intraflagellar transport 22 [Source:MGI Symbol;Acc:MGI:1914536]
ENSMUSG00000007989	0.416383	-3.7316	6.18155	-0.603667	0.546065	NA	Fzd3	frizzled class receptor 3 [Source:MGI Symbol;Acc:MGI:108476]
ENSMUSG00000008028	4.45576	0.886247	2.03669	0.435141	0.66346	NA	1700008O03Rik	RIKEN cDNA 1700008O03 gene [Source:MGI Symbol;Acc:MGI:1916599]
ENSMUSG00000008035	0.175479	1.35517	6.17294	0.219534	0.826234	NA	Mid1ip1	Mid1 interacting protein 1 (gastrulation specific G12-like (zebrafish)) [Source:MGI Symbol;Acc:MGI:1915291]
ENSMUSG00000008036	9.79022	0.472836	1.9504	0.24243	0.808447	NA	Ap2s1	adaptor-related protein complex 2, sigma 1 subunit [Source:MGI Symbol;Acc:MGI:2141861]
ENSMUSG00000008090	5.72021	-0.264149	2.09553	-0.126054	0.899689	NA	Fgfrl1	fibroblast growth factor receptor-like 1 [Source:MGI Symbol;Acc:MGI:2150920]
ENSMUSG00000008129	30.175	-0.257818	1.74181	-0.148017	0.882329	0.999653	Brme1	break repair meiotic recombinase recruitment factor 1 [Source:MGI Symbol;Acc:MGI:1921916]
ENSMUSG00000008136	1.14077	-1.84537	5.3693	-0.343689	0.73108	NA	Fhl2	four and a half LIM domains 2 [Source:MGI Symbol;Acc:MGI:1338762]
ENSMUSG00000008140	34.2831	0.347364	1.73091	0.200683	0.840947	0.999653	Emc10	ER membrane protein complex subunit 10 [Source:MGI Symbol;Acc:MGI:1916933]
ENSMUSG00000008153	2.40424	-1.34832	3.07285	-0.438783	0.660819	NA	Clstn3	calsyntenin 3 [Source:MGI Symbol;Acc:MGI:2178323]
ENSMUSG00000008167	11.2231	-0.309928	1.86053	-0.16658	0.8677	0.999653	Fbxw9	F-box and WD-40 domain protein 9 [Source:MGI Symbol;Acc:MGI:1915878]
ENSMUSG00000008193	0.184386	0.0711467	6.21527	0.0114471	0.990867	NA	Spib	Spi-B transcription factor (Spi-1/PU.1 related) [Source:MGI Symbol;Acc:MGI:892986]
ENSMUSG00000008200	23.5612	-1.07799	1.77395	-0.607679	0.5434	0.999653	Fnbp4	formin binding protein 4 [Source:MGI Symbol;Acc:MGI:1860513]
ENSMUSG00000008206	0.940319	-5.36939	6.14016	-0.874471	0.381862	NA	Cers4	ceramide synthase 4 [Source:MGI Symbol;Acc:MGI:1914510]
ENSMUSG00000008226	3.49738	-0.373094	1.63394	-0.22834	0.819382	NA	Scrn3	secernin 3 [Source:MGI Symbol;Acc:MGI:1921866]
ENSMUSG00000008301	8.31629	0.822113	1.01392	0.81083	0.417463	NA	Phax	phosphorylated adaptor for RNA export [Source:MGI Symbol;Acc:MGI:1891839]
ENSMUSG00000008305	3.04312	0.338858	2.33028	0.145415	0.884383	NA	Tle1	transducin-like enhancer of split 1 [Source:MGI Symbol;Acc:MGI:104636]
ENSMUSG00000008307	61.6552	-0.154762	1.70058	-0.0910057	0.927488	0.999653	1700109H08Rik	RIKEN cDNA 1700109H08 gene [Source:MGI Symbol;Acc:MGI:1924286]
ENSMUSG00000008318	0.512815	14.4897	6.14519	2.35789	0.0183793	NA	Relt	RELT tumor necrosis factor receptor [Source:MGI Symbol;Acc:MGI:2443373]
ENSMUSG00000008333	6.02818	0.913329	2.04856	0.44584	0.655713	NA	Snrpb2	U2 small nuclear ribonucleoprotein B [Source:MGI Symbol;Acc:MGI:104805]
ENSMUSG00000008348	72.4867	-0.246177	0.740252	-0.332559	0.739467	0.999653	Ubc	ubiquitin C [Source:MGI Symbol;Acc:MGI:98889]
ENSMUSG00000008373	10.3473	0.423665	1.91531	0.221199	0.824937	NA	Prpf31	pre-mRNA processing factor 31 [Source:MGI Symbol;Acc:MGI:1916238]
ENSMUSG00000008384	8.48613	-1.45422	1.10996	-1.31015	0.190143	NA	Sertad1	SERTA domain containing 1 [Source:MGI Symbol;Acc:MGI:1913438]
ENSMUSG00000008393	253.055	-0.926756	0.19933	-4.64936	3.33e-06	0.000128267	Carhsp1	calcium regulated heat stable protein 1 [Source:MGI Symbol;Acc:MGI:1196368]
ENSMUSG00000008398	18.3344	0.358882	0.803693	0.446541	0.655206	0.999653	Elk3	ELK3, member of ETS oncogene family [Source:MGI Symbol;Acc:MGI:101762]
ENSMUSG00000008429	571.544	-2.108	0.20435	-10.3157	5.99e-25	1e-22	Herpud2	HERPUD family member 2 [Source:MGI Symbol;Acc:MGI:1915393]
ENSMUSG00000008435	0.92781	4.32235	4.49482	0.961629	0.336236	NA	Rdh13	retinol dehydrogenase 13 (all-trans and 9-cis) [Source:MGI Symbol;Acc:MGI:1918732]
ENSMUSG00000008438	103.384	-0.140813	0.364606	-0.386207	0.699344	0.999653	Adam21	a disintegrin and metallopeptidase domain 21 [Source:MGI Symbol;Acc:MGI:1861229]
ENSMUSG00000008450	0	NA	NA	NA	NA	NA	Nutf2	nuclear transport factor 2 [Source:MGI Symbol;Acc:MGI:1915301]
ENSMUSG00000008461	7.7378	-0.412791	2.04641	-0.201714	0.84014	NA	Fut1	fucosyltransferase 1 [Source:MGI Symbol;Acc:MGI:109375]
ENSMUSG00000008475	4.5208	-1.22537	2.24793	-0.545108	0.585679	NA	Arpc5	actin related protein 2/3 complex, subunit 5 [Source:MGI Symbol;Acc:MGI:1915021]
ENSMUSG00000008482	161.477	1.22156	1.19881	1.01897	0.308215	0.999653	Rnf151	ring finger protein 151 [Source:MGI Symbol;Acc:MGI:1914754]
ENSMUSG00000008489	0.996579	-1.63104	5.35828	-0.304396	0.760826	NA	Elavl2	ELAV like RNA binding protein 1 [Source:MGI Symbol;Acc:MGI:1100887]
ENSMUSG00000008496	1.53632	0.431627	4.80642	0.0898023	0.928444	NA	Pou2f2	POU domain, class 2, transcription factor 2 [Source:MGI Symbol;Acc:MGI:101897]
ENSMUSG00000008540	8.1699	0.415225	1.98712	0.208958	0.834481	NA	Mgst1	microsomal glutathione S-transferase 1 [Source:MGI Symbol;Acc:MGI:1913850]
ENSMUSG00000008575	0.0360388	-0.360287	6.23144	-0.0578176	0.953894	NA	Nfib	nuclear factor I/B [Source:MGI Symbol;Acc:MGI:103188]
ENSMUSG00000008590	0.260038	0.37475	6.17062	0.0607312	0.951573	NA	Htr3b	5-hydroxytryptamine (serotonin) receptor 3B [Source:MGI Symbol;Acc:MGI:1861899]
ENSMUSG00000008601	0	NA	NA	NA	NA	NA	Rab25	RAB25, member RAS oncogene family [Source:MGI Symbol;Acc:MGI:1858203]
ENSMUSG00000008604	26.1353	-0.0301832	0.785613	-0.03842	0.969353	0.999653	Ubqln4	ubiquilin 4 [Source:MGI Symbol;Acc:MGI:2150152]
ENSMUSG00000008658	0.216233	1.11289	6.18503	0.179932	0.857206	NA	Rbfox1	RNA binding protein, fox-1 homolog (C. elegans) 1 [Source:MGI Symbol;Acc:MGI:1926224]
ENSMUSG00000008668	0.430024	8.54221	6.11801	1.39624	0.162642	NA	Rps18	ribosomal protein S18 [Source:MGI Symbol;Acc:MGI:98146]
ENSMUSG00000008682	0	NA	NA	NA	NA	NA	Rpl10	ribosomal protein L10 [Source:MGI Symbol;Acc:MGI:105943]
ENSMUSG00000008683	1.9378	1.06107	4.74176	0.223772	0.822935	NA	Rps15a	ribosomal protein S15A [Source:MGI Symbol;Acc:MGI:2389091]
ENSMUSG00000008690	8.30012	0.0295799	1.98148	0.0149282	0.988089	NA	Ncaph2	non-SMC condensin II complex, subunit H2 [Source:MGI Symbol;Acc:MGI:1289164]
ENSMUSG00000008730	178.401	-1.16347	1.68561	-0.690238	0.490045	0.999653	Hipk1	homeodomain interacting protein kinase 1 [Source:MGI Symbol;Acc:MGI:1314873]
ENSMUSG00000008734	28.4677	-0.256502	0.622608	-0.411979	0.680355	0.999653	Gprc5b	G protein-coupled receptor, family C, group 5, member B [Source:MGI Symbol;Acc:MGI:1927596]
ENSMUSG00000008763	75.9937	-1.22325	0.315399	-3.87842	0.000105136	0.0028474	Man1a2	mannosidase, alpha, class 1A, member 2 [Source:MGI Symbol;Acc:MGI:104676]
ENSMUSG00000008789	0	NA	NA	NA	NA	NA	Ceacam5	CEA cell adhesion molecule 5 [Source:MGI Symbol;Acc:MGI:1920500]
ENSMUSG00000008813	868.571	-0.887991	1.67084	-0.531463	0.595098	0.999653	Tppp2	tubulin polymerization-promoting protein family member 2 [Source:MGI Symbol;Acc:MGI:2684923]
ENSMUSG00000008822	70.3057	0.483041	1.62509	0.297239	0.766284	0.999653	Acyp1	acylphosphatase 1 [Source:MGI Symbol;Acc:MGI:1913454]
ENSMUSG00000008843	17.5548	-1.27476	0.763578	-1.66946	0.0950271	0.555474	Cldn13	claudin 13 [Source:MGI Symbol;Acc:MGI:1913102]
ENSMUSG00000008845	0.966405	0.044881	4.16152	0.0107848	0.991395	NA	Cd163	CD163 antigen [Source:MGI Symbol;Acc:MGI:2135946]
ENSMUSG00000008855	10.5385	0.0956878	1.26262	0.0757854	0.93959	NA	Hdac5	histone deacetylase 5 [Source:MGI Symbol;Acc:MGI:1333784]
ENSMUSG00000008859	9.78547	0.395321	1.01678	0.388797	0.697427	NA	Rala	v-ral simian leukemia viral oncogene A (ras related) [Source:MGI Symbol;Acc:MGI:1927243]
ENSMUSG00000008874	7.05836	-0.0597623	2.15839	-0.0276883	0.977911	NA	Clec3a	C-type lectin domain family 3, member a [Source:MGI Symbol;Acc:MGI:2685642]
ENSMUSG00000008892	4.76249	0.295486	2.12392	0.139123	0.889353	NA	Vdac3	voltage-dependent anion channel 3 [Source:MGI Symbol;Acc:MGI:106922]
ENSMUSG00000008932	0.435415	-2.6447	6.16844	-0.428747	0.668107	NA	Slc1a7	solute carrier family 1 (glutamate transporter), member 7 [Source:MGI Symbol;Acc:MGI:2444087]
ENSMUSG00000008958	6.0634	1.74046	2.08869	0.833281	0.404686	NA	Vps72	vacuolar protein sorting 72 [Source:MGI Symbol;Acc:MGI:1202305]
ENSMUSG00000008976	12.4459	1.5118	1.17431	1.28739	0.197957	0.81631	Gabpa	GA repeat binding protein, alpha [Source:MGI Symbol;Acc:MGI:95610]
ENSMUSG00000008999	10.3863	2.03216	1.56343	1.29981	0.193667	NA	Bmp7	bone morphogenetic protein 7 [Source:MGI Symbol;Acc:MGI:103302]
ENSMUSG00000009013	298.499	-0.0296148	0.577964	-0.0512399	0.959134	0.999653	Dynll1	dynein light chain LC8-type 1 [Source:MGI Symbol;Acc:MGI:1861457]
ENSMUSG00000009030	4.66941	0.0689802	2.13457	0.0323158	0.97422	NA	Pdcl	phosducin-like [Source:MGI Symbol;Acc:MGI:1914716]
ENSMUSG00000009035	0.459075	2.6229	6.14271	0.426995	0.669383	NA	Tmem184b	transmembrane protein 184b [Source:MGI Symbol;Acc:MGI:2445179]
ENSMUSG00000009047	0	NA	NA	NA	NA	NA	Gm5965	predicted gene 5965 [Source:MGI Symbol;Acc:MGI:3645197]
ENSMUSG00000009070	6.63987	0.0906625	1.97297	0.0459523	0.963348	NA	Rsph14	radial spoke head homolog 14 (Chlamydomonas) [Source:MGI Symbol;Acc:MGI:1918486]
ENSMUSG00000009073	45.9482	0.372176	1.72376	0.21591	0.829058	0.999653	Nf2	neurofibromin 2 [Source:MGI Symbol;Acc:MGI:97307]
ENSMUSG00000009075	23.0919	-1.90647	1.79508	-1.06206	0.28821	0.975699	Cabp7	calcium binding protein 7 [Source:MGI Symbol;Acc:MGI:2183437]
ENSMUSG00000009076	8.59364	-2.46276	1.87244	-1.31527	0.188421	NA	Zmat5	zinc finger, matrin type 5 [Source:MGI Symbol;Acc:MGI:1914428]
ENSMUSG00000009079	40.0235	-0.749813	1.51912	-0.493583	0.6216	0.999653	Ewsr1	Ewing sarcoma breakpoint region 1 [Source:MGI Symbol;Acc:MGI:99960]
ENSMUSG00000009090	33.9427	-0.0439625	1.74149	-0.0252441	0.97986	0.999653	Ap1b1	adaptor protein complex AP-1, beta 1 subunit [Source:MGI Symbol;Acc:MGI:1096368]
ENSMUSG00000009092	8.76937	-0.65092	1.91092	-0.340631	0.733381	NA	Derl3	Der1-like domain family, member 3 [Source:MGI Symbol;Acc:MGI:1917627]
ENSMUSG00000009093	304.334	0.0742107	1.67901	0.044199	0.964746	0.999653	Gstt4	glutathione S-transferase, theta 4 [Source:MGI Symbol;Acc:MGI:1923136]
ENSMUSG00000009097	7.57591	-1.15998	2.21173	-0.524467	0.599953	NA	Tbx1	T-box 1 [Source:MGI Symbol;Acc:MGI:98493]
ENSMUSG00000009108	0.486351	3.08202	6.1354	0.502334	0.615433	NA	Gnat2	G protein subunit alpha transducin 2 [Source:MGI Symbol;Acc:MGI:95779]
ENSMUSG00000009112	53.2818	-1.03535	0.362663	-2.85487	0.0043055	0.069178	Bcl2l13	BCL2 like 13 [Source:MGI Symbol;Acc:MGI:2136959]
ENSMUSG00000009114	0	NA	NA	NA	NA	NA	2610028H24Rik	RIKEN cDNA 2610028H24 gene [Source:MGI Symbol;Acc:MGI:1924214]
ENSMUSG00000009115	64.0035	-1.93547	1.61924	-1.19529	0.231973	0.879055	Spatc1l	spermatogenesis and centriole associated 1 like [Source:MGI Symbol;Acc:MGI:1923823]
ENSMUSG00000009145	0.204026	-1.32683	6.21196	-0.213592	0.830865	NA	Dqx1	DEAQ RNA-dependent ATPase [Source:MGI Symbol;Acc:MGI:2136388]
ENSMUSG00000009185	1.12529	-30	6.10945	-4.91042	9.09e-07	NA	Ccl8	C-C motif chemokine ligand 8 [Source:MGI Symbol;Acc:MGI:101878]
ENSMUSG00000009207	56.3675	-0.129707	1.71597	-0.0755885	0.939746	0.999653	Lnpk	lunapark, ER junction formation factor [Source:MGI Symbol;Acc:MGI:1918115]
ENSMUSG00000009210	1.15757	-1.75315	5.11538	-0.342721	0.731808	NA	Prr29	proline rich 29 [Source:MGI Symbol;Acc:MGI:1922823]
ENSMUSG00000009214	0	NA	NA	NA	NA	NA	Mymk	myomaker, myoblast fusion factor [Source:MGI Symbol;Acc:MGI:1913389]
ENSMUSG00000009216	1.34887	-3.72061	3.77213	-0.986341	0.323966	NA	Fam163b	family with sequence similarity 163, member B [Source:MGI Symbol;Acc:MGI:1926106]
ENSMUSG00000009246	2.42081	0.107894	3.29477	0.0327472	0.973876	NA	Trpm5	transient receptor potential cation channel, subfamily M, member 5 [Source:MGI Symbol;Acc:MGI:1861718]
ENSMUSG00000009248	0.247346	-0.423696	6.19089	-0.0684386	0.945436	NA	Ascl2	achaete-scute family bHLH transcription factor 2 [Source:MGI Symbol;Acc:MGI:96920]
ENSMUSG00000009281	0.390031	2.61539	6.14269	0.425773	0.670273	NA	Rarres2	retinoic acid receptor responder (tazarotene induced) 2 [Source:MGI Symbol;Acc:MGI:1918910]
ENSMUSG00000009291	329.584	0.968115	0.404631	2.39259	0.0167301	0.189032	Pttg1ip	pituitary tumor-transforming 1 interacting protein [Source:MGI Symbol;Acc:MGI:2652132]
ENSMUSG00000009292	0	NA	NA	NA	NA	NA	Trpm2	transient receptor potential cation channel, subfamily M, member 2 [Source:MGI Symbol;Acc:MGI:1351901]
ENSMUSG00000009293	54.562	0.435698	1.71551	0.253975	0.799515	0.999653	Ube2g2	ubiquitin-conjugating enzyme E2G 2 [Source:MGI Symbol;Acc:MGI:1343188]
ENSMUSG00000009350	5.51037	-1.20165	2.08098	-0.577446	0.563638	NA	Mpo	myeloperoxidase [Source:MGI Symbol;Acc:MGI:97137]
ENSMUSG00000009356	0	NA	NA	NA	NA	NA	Lpo	lactoperoxidase [Source:MGI Symbol;Acc:MGI:1923363]
ENSMUSG00000009376	0.538248	-2.56213	6.16164	-0.415819	0.677543	NA	Met	met proto-oncogene [Source:MGI Symbol;Acc:MGI:96969]
ENSMUSG00000009378	0.642757	-2.37886	4.81004	-0.494562	0.620909	NA	Slc16a12	solute carrier family 16 (monocarboxylic acid transporters), member 12 [Source:MGI Symbol;Acc:MGI:2147716]
ENSMUSG00000009394	3.71013	0.686146	2.13062	0.32204	0.747422	NA	Syn2	synapsin II [Source:MGI Symbol;Acc:MGI:103020]
ENSMUSG00000009406	0.48851	0.089644	6.16602	0.0145384	0.9884	NA	Elk1	ELK1, member of ETS oncogene family [Source:MGI Symbol;Acc:MGI:101833]
ENSMUSG00000009418	1.88834	-1.08057	4.80343	-0.224958	0.822012	NA	Nav1	neuron navigator 1 [Source:MGI Symbol;Acc:MGI:2183683]
ENSMUSG00000009470	48.5012	0.106172	1.72628	0.0615035	0.950958	0.999653	Tnpo1	transportin 1 [Source:MGI Symbol;Acc:MGI:2681523]
ENSMUSG00000009471	4.12421	-1.16395	2.34105	-0.497189	0.619055	NA	Myod1	myogenic differentiation 1 [Source:MGI Symbol;Acc:MGI:97275]
ENSMUSG00000009487	0.115765	0.522302	6.21035	0.0841018	0.932975	NA	Otog	otogelin [Source:MGI Symbol;Acc:MGI:1202064]
ENSMUSG00000009535	5.08886	1.05988	2.12152	0.499585	0.617368	NA	Rnmt	RNA (guanine-7-) methyltransferase [Source:MGI Symbol;Acc:MGI:1915147]
ENSMUSG00000009545	9.2904	1.40041	2.05314	0.682082	0.495187	NA	Kcnq1	potassium voltage-gated channel, subfamily Q, member 1 [Source:MGI Symbol;Acc:MGI:108083]
ENSMUSG00000009549	84.5407	0.684283	1.71348	0.399353	0.689633	0.999653	Srp14	signal recognition particle 14 [Source:MGI Symbol;Acc:MGI:107169]
ENSMUSG00000009555	5.02961	0.271526	2.18881	0.124052	0.901274	NA	Cdk9	cyclin dependent kinase 9 [Source:MGI Symbol;Acc:MGI:1328368]
ENSMUSG00000009563	1.23431	-2.39915	3.81392	-0.629051	0.529315	NA	Tor2a	torsin family 2, member A [Source:MGI Symbol;Acc:MGI:1353596]
ENSMUSG00000009566	3.21508	1.13693	2.62396	0.433288	0.664805	NA	Fpgs	folylpolyglutamyl synthetase [Source:MGI Symbol;Acc:MGI:95576]
ENSMUSG00000009569	8.67809	-0.171436	2.03524	-0.0842341	0.93287	NA	Mrtfb	myocardin related transcription factor B [Source:MGI Symbol;Acc:MGI:3050795]
ENSMUSG00000009575	20.7323	-0.167637	1.76616	-0.0949159	0.924382	0.999653	Cbx5	chromobox 5 [Source:MGI Symbol;Acc:MGI:109372]
ENSMUSG00000009580	0.184386	0.0711467	6.21527	0.0114471	0.990867	NA	Odam	odontogenic, ameloblast asssociated [Source:MGI Symbol;Acc:MGI:1916842]
ENSMUSG00000009585	1.08284	-0.731225	2.87264	-0.254548	0.799072	NA	Apobec3	apolipoprotein B mRNA editing enzyme, catalytic polypeptide 3 [Source:MGI Symbol;Acc:MGI:1933111]
ENSMUSG00000009588	0	NA	NA	NA	NA	NA	St6galnac1	ST6 (alpha-N-acetyl-neuraminyl-2,3-beta-galactosyl-1,3)-N-acetylgalactosaminide alpha-2,6-sialyltransferase 1 [Source:MGI Symbol;Acc:MGI:1341826]
ENSMUSG00000009596	18.665	0.0861863	1.27111	0.0678039	0.945942	0.999653	Taf7l	TATA-box binding protein associated factor 7 like [Source:MGI Symbol;Acc:MGI:1921719]
ENSMUSG00000009614	0.0626476	0.10105	6.21635	0.0162555	0.987031	NA	Sardh	sarcosine dehydrogenase [Source:MGI Symbol;Acc:MGI:2183102]
ENSMUSG00000009621	9.78712	1.42545	1.51456	0.941167	0.346619	NA	Vav2	vav 2 oncogene [Source:MGI Symbol;Acc:MGI:102718]
ENSMUSG00000009628	106.889	0.261465	0.441574	0.592121	0.55377	0.999653	Tex15	testis expressed gene 15 [Source:MGI Symbol;Acc:MGI:1934816]
ENSMUSG00000009630	128.662	-1.10988	0.321234	-3.45505	0.000550185	0.0121432	Ppp2cb	protein phosphatase 2 (formerly 2A), catalytic subunit, beta isoform [Source:MGI Symbol;Acc:MGI:1321161]
ENSMUSG00000009633	0.343879	-3.40253	6.19536	-0.549206	0.582864	NA	G0s2	G0/G1 switch gene 2 [Source:MGI Symbol;Acc:MGI:1316737]
ENSMUSG00000009640	23.6999	0.149894	1.75325	0.0854947	0.931868	0.999653	Dmap1	DNA methyltransferase 1-associated protein 1 [Source:MGI Symbol;Acc:MGI:1913483]
ENSMUSG00000009646	0.159751	-2.76376	6.21803	-0.444474	0.6567	NA	Pla2g12b	phospholipase A2, group XIIB [Source:MGI Symbol;Acc:MGI:1917086]
ENSMUSG00000009647	14.181	-0.751392	1.27919	-0.587396	0.556938	0.999653	Mcu	mitochondrial calcium uniporter [Source:MGI Symbol;Acc:MGI:3026965]
ENSMUSG00000009654	2.29784	-1.08363	2.54628	-0.425572	0.67042	NA	Oit3	oncoprotein induced transcript 3 [Source:MGI Symbol;Acc:MGI:1201782]
ENSMUSG00000009670	8.30515	0.0913036	1.99966	0.0456596	0.963582	NA	Tex11	testis expressed gene 11 [Source:MGI Symbol;Acc:MGI:1933237]
ENSMUSG00000009681	26.109	-0.959298	0.831414	-1.15382	0.248576	0.908444	Bcr	BCR activator of RhoGEF and GTPase [Source:MGI Symbol;Acc:MGI:88141]
ENSMUSG00000009687	1.42024	0.57345	3.7005	0.154965	0.876849	NA	Fxyd5	FXYD domain-containing ion transport regulator 5 [Source:MGI Symbol;Acc:MGI:1201785]
ENSMUSG00000009731	1.72544	1.38501	3.56303	0.388718	0.697485	NA	Kcnd1	potassium voltage-gated channel, Shal-related family, member 1 [Source:MGI Symbol;Acc:MGI:96671]
ENSMUSG00000009733	3.75669	-1.18731	2.72226	-0.436148	0.662729	NA	Tfcp2	transcription factor CP2 [Source:MGI Symbol;Acc:MGI:98509]
ENSMUSG00000009734	7.33593	1.46445	1.3282	1.10258	0.270209	NA	Pou6f2	POU domain, class 6, transcription factor 2 [Source:MGI Symbol;Acc:MGI:2443631]
ENSMUSG00000009739	7.92422	0.502284	1.97845	0.253878	0.79959	NA	Pou6f1	POU domain, class 6, transcription factor 1 [Source:MGI Symbol;Acc:MGI:102935]
ENSMUSG00000009741	21.7456	-0.478709	1.82333	-0.262546	0.7929	0.999653	Ubp1	upstream binding protein 1 [Source:MGI Symbol;Acc:MGI:104889]
ENSMUSG00000009772	0.934698	4.2627	6.12702	0.695721	0.486604	NA	Nuak2	NUAK family, SNF1-like kinase, 2 [Source:MGI Symbol;Acc:MGI:1921387]
ENSMUSG00000009828	1.86848	-0.379849	2.68494	-0.141474	0.887496	NA	Cilk1	ciliogenesis associated kinase 1 [Source:MGI Symbol;Acc:MGI:1934157]
ENSMUSG00000009863	51.0285	-0.23496	0.720253	-0.326219	0.744259	0.999653	Sdhb	succinate dehydrogenase complex, subunit B, iron sulfur (Ip) [Source:MGI Symbol;Acc:MGI:1914930]
ENSMUSG00000009876	1.39494	2.35466	3.04133	0.774221	0.4388	NA	Cox4i2	cytochrome c oxidase subunit 4I2 [Source:MGI Symbol;Acc:MGI:2135755]
ENSMUSG00000009894	35.5395	-0.578242	0.571226	-1.01228	0.311403	0.999653	Snap47	synaptosomal-associated protein, 47 [Source:MGI Symbol;Acc:MGI:1915076]
ENSMUSG00000009900	3.33346	-2.23527	2.58584	-0.864426	0.387354	NA	Wnt3a	wingless-type MMTV integration site family, member 3A [Source:MGI Symbol;Acc:MGI:98956]
ENSMUSG00000009905	3.75907	1.71471	1.89979	0.902579	0.366749	NA	Kdsr	3-ketodihydrosphingosine reductase [Source:MGI Symbol;Acc:MGI:1918000]
ENSMUSG00000009907	8.86651	0.730982	1.30239	0.561261	0.574619	NA	Vps4b	vacuolar protein sorting 4B [Source:MGI Symbol;Acc:MGI:1100499]
ENSMUSG00000009927	18.9019	0.398222	1.11422	0.357399	0.720793	0.999653	Rps25	ribosomal protein S25 [Source:MGI Symbol;Acc:MGI:1922867]
ENSMUSG00000009941	10.3212	0.352418	1.93794	0.181852	0.855699	NA	Nxf2	nuclear RNA export factor 2 [Source:MGI Symbol;Acc:MGI:1933192]
ENSMUSG00000009995	0.700902	3.86848	6.12903	0.631173	0.527927	NA	Tafazzin	tafazzin, phospholipid-lysophospholipid transacylase [Source:MGI Symbol;Acc:MGI:109626]
ENSMUSG00000010021	13.1038	0.233759	1.82452	0.128121	0.898053	0.999653	Kif19a	kinesin family member 19A [Source:MGI Symbol;Acc:MGI:2447024]
ENSMUSG00000010025	6.43004	0.580768	2.09796	0.276825	0.781914	NA	Aldh3a2	aldehyde dehydrogenase family 3, subfamily A2 [Source:MGI Symbol;Acc:MGI:1353452]
ENSMUSG00000010044	112.078	2.89772	1.41272	2.05116	0.0402516	0.334423	Zmynd10	zinc finger, MYND domain containing 10 [Source:MGI Symbol;Acc:MGI:2387863]
ENSMUSG00000010045	48.7365	0.557652	0.516957	1.07872	0.280712	0.962396	Tmem115	transmembrane protein 115 [Source:MGI Symbol;Acc:MGI:1930765]
ENSMUSG00000010047	1.30197	-0.835602	3.78307	-0.220879	0.825186	NA	Hyal2	hyaluronoglucosaminidase 2 [Source:MGI Symbol;Acc:MGI:1196334]
ENSMUSG00000010048	19.7871	0.225258	1.79005	0.125839	0.899859	0.999653	Ifrd2	interferon-related developmental regulator 2 [Source:MGI Symbol;Acc:MGI:1316708]
ENSMUSG00000010051	0.252272	1.31305	6.17695	0.212573	0.83166	NA	Hyal1	hyaluronoglucosaminidase 1 [Source:MGI Symbol;Acc:MGI:96298]
ENSMUSG00000010054	3.3907	-0.326194	1.98631	-0.164221	0.869557	NA	Tusc2	tumor suppressor 2, mitochondrial calcium regulator [Source:MGI Symbol;Acc:MGI:1931086]
ENSMUSG00000010057	9.59983	0.20229	2.03597	0.099358	0.920854	NA	Nprl2	NPR2 like, GATOR1 complex subunit [Source:MGI Symbol;Acc:MGI:1914482]
ENSMUSG00000010064	0.0798753	-2.26912	6.23278	-0.364062	0.715812	NA	Slc38a3	solute carrier family 38, member 3 [Source:MGI Symbol;Acc:MGI:1923507]
ENSMUSG00000010066	1.97882	-1.37232	3.02365	-0.453861	0.649929	NA	Cacna2d2	calcium channel, voltage-dependent, alpha 2/delta subunit 2 [Source:MGI Symbol;Acc:MGI:1929813]
ENSMUSG00000010067	9.60648	0.578017	1.20742	0.478722	0.632136	NA	Rassf1	Ras association (RalGDS/AF-6) domain family member 1 [Source:MGI Symbol;Acc:MGI:1928386]
ENSMUSG00000010080	0.922562	-3.35304	5.593	-0.599507	0.548835	NA	Epn3	epsin 3 [Source:MGI Symbol;Acc:MGI:1919139]
ENSMUSG00000010086	4.09986	-0.106189	3.14496	-0.0337647	0.973065	NA	Rnf112	ring finger protein 112 [Source:MGI Symbol;Acc:MGI:106611]
ENSMUSG00000010095	49.9624	0.768957	1.72688	0.445287	0.656112	0.999653	Slc3a2	solute carrier family 3 (activators of dibasic and neutral amino acid transport), member 2 [Source:MGI Symbol;Acc:MGI:96955]
ENSMUSG00000010097	42.7898	-0.188837	1.68486	-0.112079	0.910761	0.999653	Nxf1	nuclear RNA export factor 1 [Source:MGI Symbol;Acc:MGI:1858330]
ENSMUSG00000010110	5.28637	-1.5451	2.13339	-0.724246	0.468915	NA	Stx5a	syntaxin 5A [Source:MGI Symbol;Acc:MGI:1928483]
ENSMUSG00000010122	0	NA	NA	NA	NA	NA	Slc47a1	solute carrier family 47, member 1 [Source:MGI Symbol;Acc:MGI:1914723]
ENSMUSG00000010136	93.1858	0.61466	0.452204	1.35925	0.174066	0.76837	Cimap3	ciliary microtubule associated protein 3 [Source:MGI Symbol;Acc:MGI:1923670]
ENSMUSG00000010142	0.134334	-0.345655	6.23278	-0.0554576	0.955774	NA	Tnfrsf13b	tumor necrosis factor receptor superfamily, member 13b [Source:MGI Symbol;Acc:MGI:1889411]
ENSMUSG00000010154	20.6584	-2.29287	1.20683	-1.89992	0.0574438	0.415915	Spire2	spire type actin nucleation factor 2 [Source:MGI Symbol;Acc:MGI:2446256]
ENSMUSG00000010175	2.37363	-3.55149	3.3678	-1.05454	0.291634	NA	Prox1	prospero homeobox 1 [Source:MGI Symbol;Acc:MGI:97772]
ENSMUSG00000010205	0	NA	NA	NA	NA	NA	Raver1	ribonucleoprotein, PTB-binding 1 [Source:MGI Symbol;Acc:MGI:1919016]
ENSMUSG00000010277	278.938	0.133327	0.212621	0.627064	0.530618	0.999653	Bltp2	bridge-like lipid transfer protein family member 2 [Source:MGI Symbol;Acc:MGI:1919753]
ENSMUSG00000010290	15.8728	0.000522404	1.20227	0.000434513	0.999653	0.999653	AI597479	expressed sequence AI597479 [Source:MGI Symbol;Acc:MGI:2138299]
ENSMUSG00000010307	7.7504	2.88971	1.21374	2.38083	0.0172735	NA	Tmem86a	transmembrane protein 86A [Source:MGI Symbol;Acc:MGI:1915143]
ENSMUSG00000010311	0	NA	NA	NA	NA	NA	Optc	opticin [Source:MGI Symbol;Acc:MGI:2151113]
ENSMUSG00000010342	103.081	-0.280747	0.448326	-0.626213	0.531175	0.999653	Tex14	testis expressed gene 14 [Source:MGI Symbol;Acc:MGI:1933227]
ENSMUSG00000010358	0.545945	3.66926	6.11708	0.599839	0.548614	NA	Ifi35	interferon-induced protein 35 [Source:MGI Symbol;Acc:MGI:1917360]
ENSMUSG00000010362	0.601971	-1.60718	6.12932	-0.262211	0.793158	NA	Rdm1	RAD52 motif 1 [Source:MGI Symbol;Acc:MGI:1913849]
ENSMUSG00000010376	26.2087	0.590009	0.617682	0.955198	0.339478	0.999653	Nedd8	neural precursor cell expressed, developmentally down-regulated gene 8 [Source:MGI Symbol;Acc:MGI:97301]
ENSMUSG00000010392	20.9663	0.172081	0.65363	0.26327	0.792342	0.999653	Gosr1	golgi SNAP receptor complex member 1 [Source:MGI Symbol;Acc:MGI:1858260]
ENSMUSG00000010406	5.59801	0.767472	2.86001	0.268346	0.788433	NA	Mrpl52	mitochondrial ribosomal protein L52 [Source:MGI Symbol;Acc:MGI:1916086]
ENSMUSG00000010435	32.5224	-0.0117312	1.77904	-0.00659413	0.994739	0.999653	Spaca7	sperm acrosome associated 7 [Source:MGI Symbol;Acc:MGI:1925884]
ENSMUSG00000010453	31.7116	-0.33457	1.73453	-0.192888	0.847046	0.999653	Kansl3	KAT8 regulatory NSL complex subunit 3 [Source:MGI Symbol;Acc:MGI:1918055]
ENSMUSG00000010461	77.5124	-2.04605	1.71166	-1.19536	0.231948	0.879055	Eya4	EYA transcriptional coactivator and phosphatase 4 [Source:MGI Symbol;Acc:MGI:1337104]
ENSMUSG00000010476	0.146705	1.24926	6.17433	0.202331	0.839658	NA	Ebf3	early B cell factor 3 [Source:MGI Symbol;Acc:MGI:894289]
ENSMUSG00000010505	3.33622	1.25376	2.32439	0.539394	0.589615	NA	Myt1	myelin transcription factor 1 [Source:MGI Symbol;Acc:MGI:1100535]
ENSMUSG00000010517	90.9741	-0.918584	0.423281	-2.17015	0.0299954	0.276421	Faf1	Fas-associated factor 1 [Source:MGI Symbol;Acc:MGI:109419]
ENSMUSG00000010529	0.506817	0.331445	6.17242	0.0536977	0.957176	NA	Gm266	predicted gene 266 [Source:MGI Symbol;Acc:MGI:2685112]
ENSMUSG00000010538	33.3798	-0.273338	1.73046	-0.157957	0.874491	0.999653	Tsacc	TSSK6 activating co-chaperone [Source:MGI Symbol;Acc:MGI:1924177]
ENSMUSG00000010554	7.15097	1.55762	1.99515	0.780706	0.434975	NA	Mettl16	methyltransferase 16, N6-methyladenosine [Source:MGI Symbol;Acc:MGI:1914743]
ENSMUSG00000010592	27.0567	1.73632	1.77861	0.976221	0.328955	0.999653	Dazl	deleted in azoospermia-like [Source:MGI Symbol;Acc:MGI:1342328]
ENSMUSG00000010601	0.250591	1.41735	6.17383	0.229574	0.818423	NA	Apol7a	apolipoprotein L 7a [Source:MGI Symbol;Acc:MGI:1923011]
ENSMUSG00000010607	0.499396	1.49202	6.12398	0.243636	0.807513	NA	Pigyl	phosphatidylinositol glycan anchor biosynthesis, class Y-like [Source:MGI Symbol;Acc:MGI:1913518]
ENSMUSG00000010608	62.3692	0.887257	1.16901	0.758984	0.447862	0.999653	Rbm25	RNA binding motif protein 25 [Source:MGI Symbol;Acc:MGI:1914289]
ENSMUSG00000010609	1.07862	2.30319	4.85391	0.474502	0.635142	NA	Psen2	presenilin 2 [Source:MGI Symbol;Acc:MGI:109284]
ENSMUSG00000010651	15.8376	-0.125169	1.90811	-0.0655985	0.947697	0.999653	Acaa1b	acetyl-Coenzyme A acyltransferase 1B [Source:MGI Symbol;Acc:MGI:3605455]
ENSMUSG00000010660	3.81501	0.357992	3.01586	0.118703	0.905511	NA	Plcd1	phospholipase C, delta 1 [Source:MGI Symbol;Acc:MGI:97614]
ENSMUSG00000010663	2.88075	1.07169	3.15049	0.340168	0.73373	NA	Fads1	fatty acid desaturase 1 [Source:MGI Symbol;Acc:MGI:1923517]
ENSMUSG00000010721	5.42801	0.157215	2.11945	0.0741773	0.940869	NA	Lmbr1	limb region 1 [Source:MGI Symbol;Acc:MGI:1861746]
ENSMUSG00000010751	0.0360388	-0.360287	6.23144	-0.0578176	0.953894	NA	Tnfrsf22	tumor necrosis factor receptor superfamily, member 22 [Source:MGI Symbol;Acc:MGI:1930270]
ENSMUSG00000010755	14.1347	-2.90344	1.57399	-1.84464	0.0650901	0.446065	Cars1	cysteinyl-tRNA synthetase 1 [Source:MGI Symbol;Acc:MGI:1351477]
ENSMUSG00000010760	0.225987	-2.99213	6.21007	-0.481819	0.629935	NA	Phlda2	pleckstrin homology like domain, family A, member 2 [Source:MGI Symbol;Acc:MGI:1202307]
ENSMUSG00000010796	8.89373	0.17235	2.05761	0.083762	0.933246	NA	Asz1	ankyrin repeat, SAM and basic leucine zipper domain containing 1 [Source:MGI Symbol;Acc:MGI:1921318]
ENSMUSG00000010797	11.1929	-2.80113	1.59201	-1.75949	0.0784938	0.499814	Wnt2	wingless-type MMTV integration site family, member 2 [Source:MGI Symbol;Acc:MGI:98954]
ENSMUSG00000010803	0.534674	-0.827396	6.07764	-0.136138	0.891713	NA	Gabra1	gamma-aminobutyric acid type A receptor subunit alpha 1 [Source:MGI Symbol;Acc:MGI:95613]
ENSMUSG00000010825	0	NA	NA	NA	NA	NA	Grid2ip	glutamate receptor, ionotropic, delta 2 (Grid2) interacting protein 1 [Source:MGI Symbol;Acc:MGI:2176213]
ENSMUSG00000010830	12.0413	0.503289	1.79403	0.280535	0.779067	0.999653	Kdelr3	KDEL (Lys-Asp-Glu-Leu) endoplasmic reticulum protein retention receptor 3 [Source:MGI Symbol;Acc:MGI:2145953]
ENSMUSG00000010841	31.6879	-1.11419	0.974465	-1.14339	0.252876	0.914773	Cfap97d1	CFAP97 domain containing 1 [Source:MGI Symbol;Acc:MGI:1922687]
ENSMUSG00000010911	9.63182	-4.41138	1.77097	-2.49094	0.0127406	NA	Apip	APAF1 interacting protein [Source:MGI Symbol;Acc:MGI:1926788]
ENSMUSG00000010914	47.4797	0.787088	0.419101	1.87804	0.0603757	0.428166	Pdhx	pyruvate dehydrogenase complex, component X [Source:MGI Symbol;Acc:MGI:1351627]
ENSMUSG00000010936	2.01094	-0.421324	3.52658	-0.119471	0.904902	NA	Vac14	Vac14 homolog (S. cerevisiae) [Source:MGI Symbol;Acc:MGI:2157980]
ENSMUSG00000011008	0.451974	-3.60728	6.19183	-0.582587	0.560172	NA	Mcoln2	mucolipin 2 [Source:MGI Symbol;Acc:MGI:1915529]
ENSMUSG00000011034	0	NA	NA	NA	NA	NA	Slc5a1	solute carrier family 5 (sodium/glucose cotransporter), member 1 [Source:MGI Symbol;Acc:MGI:107678]
ENSMUSG00000011096	5.83662	0.384814	2.1482	0.179134	0.857833	NA	Akt1s1	AKT1 substrate 1 [Source:MGI Symbol;Acc:MGI:1914855]
ENSMUSG00000011114	76.0753	0.747048	0.7745	0.964555	0.334768	0.999653	Tbrg1	transforming growth factor beta regulated gene 1 [Source:MGI Symbol;Acc:MGI:1100877]
ENSMUSG00000011118	0.422541	-9.74281	6.13185	-1.58889	0.112086	NA	Panx3	pannexin 3 [Source:MGI Symbol;Acc:MGI:1918881]
ENSMUSG00000011148	0.333106	-3.44077	6.19476	-0.555432	0.578599	NA	Adss1	adenylosuccinate synthase 1 [Source:MGI Symbol;Acc:MGI:87947]
ENSMUSG00000011154	60.221	0.0650769	1.70632	0.0381388	0.969577	0.999653	Cfap161	cilia and flagella associated protein 161 [Source:MGI Symbol;Acc:MGI:1922806]
ENSMUSG00000011158	28.3601	-0.0267394	0.57942	-0.0461486	0.963192	0.999653	Brf1	BRF1, RNA polymerase III transcription initiation factor 90 kDa subunit [Source:MGI Symbol;Acc:MGI:1919558]
ENSMUSG00000011171	0	NA	NA	NA	NA	NA	Vipr2	vasoactive intestinal peptide receptor 2 [Source:MGI Symbol;Acc:MGI:107166]
ENSMUSG00000011179	12.7589	-1.79388	1.86011	-0.964393	0.334849	0.999653	Odc1	ornithine decarboxylase, structural 1 [Source:MGI Symbol;Acc:MGI:97402]
ENSMUSG00000011254	1.64225	-0.914984	3.02458	-0.302516	0.762259	NA	Thg1l	tRNA-histidine guanylyltransferase 1-like (S. cerevisiae) [Source:MGI Symbol;Acc:MGI:1913878]
ENSMUSG00000011256	1.5989	1.95	2.94829	0.661399	0.508356	NA	Adam19	ADAM metallopeptidase domain 19 [Source:MGI Symbol;Acc:MGI:105377]
ENSMUSG00000011257	0.250591	1.41735	6.17383	0.229574	0.818423	NA	Pabpc4	poly(A) binding protein, cytoplasmic 4 [Source:MGI Symbol;Acc:MGI:2385206]
ENSMUSG00000011263	14.0395	1.79607	0.933962	1.92307	0.0544713	0.40218	Exoc3l2	exocyst complex component 3-like 2 [Source:MGI Symbol;Acc:MGI:1921713]
ENSMUSG00000011267	6.95606	-1.9359	1.808	-1.07074	0.284286	NA	Zfp296	zinc finger protein 296 [Source:MGI Symbol;Acc:MGI:1926956]
ENSMUSG00000011305	0.363926	0.569798	6.13499	0.0928768	0.926001	NA	Plin5	perilipin 5 [Source:MGI Symbol;Acc:MGI:1914218]
ENSMUSG00000011306	65.9919	-0.155193	0.444821	-0.348889	0.727173	0.999653	Sugp1	SURP and G patch domain containing 1 [Source:MGI Symbol;Acc:MGI:1917866]
ENSMUSG00000011349	113.998	0.643334	0.367695	1.74964	0.0801804	0.506365	Dmrtc2	doublesex and mab-3 related transcription factor like family C2 [Source:MGI Symbol;Acc:MGI:1918491]
ENSMUSG00000011350	119.269	-0.9348	1.68513	-0.554734	0.579077	0.999653	Gm5893	predicted gene 5893 [Source:MGI Symbol;Acc:MGI:3645761]
ENSMUSG00000011382	1.68569	3.93878	3.92199	1.00428	0.315244	NA	Dhdh	dihydrodiol dehydrogenase [Source:MGI Symbol;Acc:MGI:1919005]
ENSMUSG00000011427	0.415879	-0.114149	6.11098	-0.0186794	0.985097	NA	Zfp790	zinc finger protein 790 [Source:MGI Symbol;Acc:MGI:1923431]
ENSMUSG00000011463	0	NA	NA	NA	NA	NA	Cpb1	carboxypeptidase B1 [Source:MGI Symbol;Acc:MGI:1923953]
ENSMUSG00000011486	1.65956	-2.67232	3.61205	-0.739833	0.459401	NA	Slc25a41	solute carrier family 25, member 41 [Source:MGI Symbol;Acc:MGI:2144215]
ENSMUSG00000011589	1.0188	-0.165526	3.68745	-0.044889	0.964196	NA	Fsd1	fibronectin type 3 and SPRY domain-containing protein [Source:MGI Symbol;Acc:MGI:1934858]
ENSMUSG00000011632	4.86038	3.28273	1.75916	1.86608	0.0620301	NA	Pinlyp	phospholipase A2 inhibitor and LY6/PLAUR domain containing [Source:MGI Symbol;Acc:MGI:3615324]
ENSMUSG00000011658	10.8854	0.290268	1.8969	0.153022	0.878381	NA	Fuz	fuzzy planar cell polarity protein [Source:MGI Symbol;Acc:MGI:1917550]
ENSMUSG00000011751	26.4124	-0.370667	1.7548	-0.211231	0.832707	0.999653	Sptbn4	spectrin beta, non-erythrocytic 4 [Source:MGI Symbol;Acc:MGI:1890574]
ENSMUSG00000011752	0.862671	-0.337242	5.58038	-0.0604335	0.95181	NA	Pgam1	phosphoglycerate mutase 1 [Source:MGI Symbol;Acc:MGI:97552]
ENSMUSG00000011831	7.34504	-0.885945	1.10504	-0.80173	0.422709	NA	Evi5	ecotropic viral integration site 5 [Source:MGI Symbol;Acc:MGI:104736]
ENSMUSG00000011832	58.4367	-1.70856	1.63748	-1.04341	0.29676	0.988638	Evi5l	ecotropic viral integration site 5 like [Source:MGI Symbol;Acc:MGI:2442167]
ENSMUSG00000011837	1.78839	0.397706	3.70186	0.107434	0.914445	NA	Snapc2	small nuclear RNA activating complex, polypeptide 2 [Source:MGI Symbol;Acc:MGI:1914861]
ENSMUSG00000011877	724.636	-0.834784	1.67181	-0.49933	0.617547	0.999653	Git1	GIT ArfGAP 1 [Source:MGI Symbol;Acc:MGI:1927140]
ENSMUSG00000011884	0.435399	2.9569	6.13685	0.481826	0.62993	NA	Gltp	glycolipid transfer protein [Source:MGI Symbol;Acc:MGI:1929253]
ENSMUSG00000011958	11.1298	-0.025518	1.9504	-0.0130835	0.989561	0.999653	Bnip2	BCL2/adenovirus E1B interacting protein 2 [Source:MGI Symbol;Acc:MGI:109327]
ENSMUSG00000011960	4.79784	-0.0286041	2.68197	-0.0106654	0.99149	NA	Ccnt1	cyclin T1 [Source:MGI Symbol;Acc:MGI:1328363]
ENSMUSG00000012017	0.26257	2.23297	6.14813	0.363195	0.716459	NA	Scarf2	scavenger receptor class F, member 2 [Source:MGI Symbol;Acc:MGI:1858430]
ENSMUSG00000012042	25.9991	-0.162901	1.20943	-0.134692	0.892855	0.999653	4930579F01Rik	RIKEN cDNA 4930579F01 gene [Source:MGI Symbol;Acc:MGI:1914991]
ENSMUSG00000012076	3.34413	0.213523	2.18989	0.0975041	0.922326	NA	Brms1l	breast cancer metastasis-suppressor 1-like [Source:MGI Symbol;Acc:MGI:1196337]
ENSMUSG00000012114	19.404	0.371398	1.80298	0.205991	0.836798	0.999653	Med15	mediator complex subunit 15 [Source:MGI Symbol;Acc:MGI:2137379]
ENSMUSG00000012117	8.46007	-0.765798	1.99814	-0.383255	0.701531	NA	Dhdds	dehydrodolichyl diphosphate synthase [Source:MGI Symbol;Acc:MGI:1914672]
ENSMUSG00000012123	1.24319	-2.57108	3.85595	-0.666782	0.504912	NA	Crybg2	crystallin beta-gamma domain containing 2 [Source:MGI Symbol;Acc:MGI:1334463]
ENSMUSG00000012126	261.92	-1.11007	0.483377	-2.2965	0.0216475	0.221547	Ubxn11	UBX domain protein 11 [Source:MGI Symbol;Acc:MGI:1914836]
ENSMUSG00000012187	0	NA	NA	NA	NA	NA	Mogat1	monoacylglycerol O-acyltransferase 1 [Source:MGI Symbol;Acc:MGI:1915643]
ENSMUSG00000012211	49.4574	1.18152	1.49688	0.789323	0.429923	0.999653	Tex22	testis expressed gene 22 [Source:MGI Symbol;Acc:MGI:1922921]
ENSMUSG00000012282	0.938116	-5.61757	6.11603	-0.918499	0.358357	NA	Wnt8a	wingless-type MMTV integration site family, member 8A [Source:MGI Symbol;Acc:MGI:107924]
ENSMUSG00000012296	7.11751	-0.773419	2.15371	-0.359109	0.719513	NA	Tjap1	tight junction associated protein 1 [Source:MGI Symbol;Acc:MGI:1921344]
ENSMUSG00000012350	0	NA	NA	NA	NA	NA	Ehf	ets homologous factor [Source:MGI Symbol;Acc:MGI:1270840]
ENSMUSG00000012396	0	NA	NA	NA	NA	NA	Nanog	Nanog homeobox [Source:MGI Symbol;Acc:MGI:1919200]
ENSMUSG00000012405	0.341752	9.4515	6.13018	1.5418	0.123123	NA	Rpl15	ribosomal protein L15 [Source:MGI Symbol;Acc:MGI:1913730]
ENSMUSG00000012422	0.377567	2.58856	6.1429	0.421391	0.67347	NA	Tmem167	transmembrane protein 167 [Source:MGI Symbol;Acc:MGI:1913324]
ENSMUSG00000012428	1.8098	3.32825	2.73418	1.21728	0.223499	NA	Steap4	STEAP family member 4 [Source:MGI Symbol;Acc:MGI:1923560]
ENSMUSG00000012429	2.97421	1.50845	3.11509	0.48424	0.628215	NA	Mplkip	M-phase specific PLK1 intereacting protein [Source:MGI Symbol;Acc:MGI:1913558]
ENSMUSG00000012443	32.0467	0.402638	0.622559	0.646748	0.517795	0.999653	Kif11	kinesin family member 11 [Source:MGI Symbol;Acc:MGI:1098231]
ENSMUSG00000012483	1.84751	-1.49146	2.45425	-0.607704	0.543384	NA	Rpa3	replication protein A3 [Source:MGI Symbol;Acc:MGI:1915490]
ENSMUSG00000012519	6.19865	-1.02064	2.00884	-0.508071	0.611404	NA	Mlkl	mixed lineage kinase domain-like [Source:MGI Symbol;Acc:MGI:1921818]
ENSMUSG00000012520	0	NA	NA	NA	NA	NA	Phox2b	paired-like homeobox 2b [Source:MGI Symbol;Acc:MGI:1100882]
ENSMUSG00000012535	14.1201	0.878567	1.31072	0.670292	0.502671	0.999653	Tnpo3	transportin 3 [Source:MGI Symbol;Acc:MGI:1196412]
ENSMUSG00000012609	70.986	-0.623546	1.73255	-0.359902	0.718921	0.999653	Ttll5	tubulin tyrosine ligase-like family, member 5 [Source:MGI Symbol;Acc:MGI:2443657]
ENSMUSG00000012640	2.44133	-0.0722181	2.82754	-0.025541	0.979623	NA	Zfp715	zinc finger protein 715 [Source:MGI Symbol;Acc:MGI:1917180]
ENSMUSG00000012705	0.1085	0.94942	6.1857	0.153486	0.878015	NA	Retn	resistin [Source:MGI Symbol;Acc:MGI:1888506]
ENSMUSG00000012777	6.39428	0.677553	2.11748	0.319981	0.748983	NA	Acp4	acid phosphatase 4 [Source:MGI Symbol;Acc:MGI:3644563]
ENSMUSG00000012819	19.0554	-1.02488	1.82006	-0.563103	0.573365	0.999653	Cdh23	cadherin related 23 (otocadherin) [Source:MGI Symbol;Acc:MGI:1890219]
ENSMUSG00000012848	49.6389	0.0131119	1.73897	0.00754005	0.993984	0.999653	Rps5	ribosomal protein S5 [Source:MGI Symbol;Acc:MGI:1097682]
ENSMUSG00000012889	0.184386	0.0711467	6.21527	0.0114471	0.990867	NA	Podnl1	podocan-like 1 [Source:MGI Symbol;Acc:MGI:2685352]
ENSMUSG00000013033	4.86506	1.40081	2.22907	0.628429	0.529723	NA	Adgrl1	adhesion G protein-coupled receptor L1 [Source:MGI Symbol;Acc:MGI:1929461]
ENSMUSG00000013076	47.8743	0.0436875	0.518107	0.0843214	0.932801	0.999653	Amotl1	angiomotin-like 1 [Source:MGI Symbol;Acc:MGI:1922973]
ENSMUSG00000013083	21.1572	1.19708	1.77834	0.673146	0.500854	0.999653	2200002J24Rik	RIKEN cDNA 2200002J24 gene [Source:MGI Symbol;Acc:MGI:1916397]
ENSMUSG00000013089	3.48253	1.30268	2.66967	0.487953	0.625583	NA	Etv5	ets variant 5 [Source:MGI Symbol;Acc:MGI:1096867]
ENSMUSG00000013091	70.743	0.773096	0.688547	1.12279	0.261525	0.928968	Tmem190	transmembrane protein 190 [Source:MGI Symbol;Acc:MGI:1925302]
ENSMUSG00000013150	7.3135	-0.77231	1.23583	-0.624931	0.532016	NA	Gfod2	glucose-fructose oxidoreductase domain containing 2 [Source:MGI Symbol;Acc:MGI:1917825]
ENSMUSG00000013155	28.442	-0.228346	1.76227	-0.129575	0.896903	0.999653	Enkd1	enkurin domain containing 1 [Source:MGI Symbol;Acc:MGI:2142593]
ENSMUSG00000013158	20.5589	0.170783	1.83372	0.0931346	0.925797	0.999653	4933405L10Rik	RIKEN cDNA 4933405L10 gene [Source:MGI Symbol;Acc:MGI:1918296]
ENSMUSG00000013160	23.6694	-0.282063	0.533699	-0.528505	0.597149	0.999653	Atp6v0d1	ATPase, H+ transporting, lysosomal V0 subunit D1 [Source:MGI Symbol;Acc:MGI:1201778]
ENSMUSG00000013236	15.8454	-0.174085	1.80909	-0.0962278	0.92334	0.999653	Ptprs	protein tyrosine phosphatase receptor type S [Source:MGI Symbol;Acc:MGI:97815]
ENSMUSG00000013275	10.1476	-0.104384	1.09397	-0.0954182	0.923983	NA	Slc41a1	solute carrier family 41, member 1 [Source:MGI Symbol;Acc:MGI:2444823]
ENSMUSG00000013338	3.41192	3.38877	1.96752	1.72236	0.0850048	NA	Fer1l4	fer-1 like family member 4 [Source:MGI Symbol;Acc:MGI:1921812]
ENSMUSG00000013353	0.595554	4.24997	6.10621	0.696008	0.486424	NA	4931406B18Rik	RIKEN cDNA 4931406B18 gene [Source:MGI Symbol;Acc:MGI:1921304]
ENSMUSG00000013367	3.54117	-0.779074	1.97485	-0.394499	0.693213	NA	Iglon5	IgLON family member 5 [Source:MGI Symbol;Acc:MGI:2686277]
ENSMUSG00000013415	10.6819	0.831952	1.24746	0.666919	0.504824	NA	Igf2bp1	insulin-like growth factor 2 mRNA binding protein 1 [Source:MGI Symbol;Acc:MGI:1890357]
ENSMUSG00000013418	2.17178	0.728222	3.75935	0.19371	0.846403	NA	B4galnt2	beta-1,4-N-acetyl-galactosaminyl transferase 2 [Source:MGI Symbol;Acc:MGI:1342058]
ENSMUSG00000013419	11.6625	-1.91784	1.60593	-1.19423	0.232389	0.879055	Zbtb47	zinc finger and BTB domain containing 47 [Source:MGI Symbol;Acc:MGI:2670992]
ENSMUSG00000013465	6.67713	1.11795	2.09506	0.533614	0.593609	NA	Nelfb	negative elongation factor complex member B [Source:MGI Symbol;Acc:MGI:1931035]
ENSMUSG00000013483	0.499659	-3.972	6.1724	-0.643511	0.519893	NA	Card14	caspase recruitment domain family, member 14 [Source:MGI Symbol;Acc:MGI:2386258]
ENSMUSG00000013495	24.567	-1.27875	0.659717	-1.93833	0.0525832	0.395922	Tmem175	transmembrane protein 175 [Source:MGI Symbol;Acc:MGI:1919642]
ENSMUSG00000013523	1.91093	0.441314	3.736	0.118125	0.905969	NA	Bcas1	brain enriched myelin associated protein 1 [Source:MGI Symbol;Acc:MGI:1924210]
ENSMUSG00000013539	0.38315	2.4074	6.14607	0.391698	0.695282	NA	Tango2	transport and golgi organization 2 [Source:MGI Symbol;Acc:MGI:101825]
ENSMUSG00000013584	97.482	0.789768	0.289265	2.73026	0.00632851	0.0904364	Aldh1a2	aldehyde dehydrogenase family 1, subfamily A2 [Source:MGI Symbol;Acc:MGI:107928]
ENSMUSG00000013593	61.5533	-0.115427	1.74506	-0.0661447	0.947263	0.999653	Ndufs2	NADH:ubiquinone oxidoreductase core subunit S2 [Source:MGI Symbol;Acc:MGI:2385112]
ENSMUSG00000013611	0.635964	0.767362	5.9555	0.128849	0.897477	NA	Snx31	sorting nexin 31 [Source:MGI Symbol;Acc:MGI:1913946]
ENSMUSG00000013622	5.04289	0.66635	2.28314	0.291856	0.770397	NA	Atraid	all-trans retinoic acid induced differentiation factor [Source:MGI Symbol;Acc:MGI:1918918]
ENSMUSG00000013629	18.106	0.187342	1.78792	0.104782	0.916548	0.999653	Cad	carbamoyl-phosphate synthetase 2, aspartate transcarbamylase, and dihydroorotase [Source:MGI Symbol;Acc:MGI:1916969]
ENSMUSG00000013643	0	NA	NA	NA	NA	NA	Lypd8	LY6/PLAUR domain containing 8 [Source:MGI Symbol;Acc:MGI:1917413]
ENSMUSG00000013646	2.46416	2.30689	3.32127	0.694581	0.487318	NA	Sh3bp5l	SH3 binding domain protein 5 like [Source:MGI Symbol;Acc:MGI:1933124]
ENSMUSG00000013653	17.2967	2.37175	1.73447	1.36742	0.171493	0.761414	1810065E05Rik	RIKEN cDNA 1810065E05 gene [Source:MGI Symbol;Acc:MGI:1917114]
ENSMUSG00000013662	205.583	-0.149899	1.68221	-0.0891083	0.928996	0.999653	Atad1	ATPase family, AAA domain containing 1 [Source:MGI Symbol;Acc:MGI:1915229]
ENSMUSG00000013663	139.778	-0.74926	0.254725	-2.94145	0.00326679	0.055206	Pten	phosphatase and tensin homolog [Source:MGI Symbol;Acc:MGI:109583]
ENSMUSG00000013668	146.849	-0.0242122	0.34476	-0.070229	0.944011	0.999653	4933402N03Rik	RIKEN cDNA 4933402N03 gene [Source:MGI Symbol;Acc:MGI:1914681]
ENSMUSG00000013698	2.81033	0.53836	2.58239	0.208473	0.834859	NA	Pea15a	proliferation and apoptosis adaptor protein 15A [Source:MGI Symbol;Acc:MGI:104799]
ENSMUSG00000013701	0.276579	0.357579	6.20964	0.0575846	0.95408	NA	Timm23	translocase of inner mitochondrial membrane 23 [Source:MGI Symbol;Acc:MGI:1858317]
ENSMUSG00000013707	2.75286	-0.474083	2.7259	-0.173918	0.86193	NA	Tnfaip8l2	tumor necrosis factor, alpha-induced protein 8-like 2 [Source:MGI Symbol;Acc:MGI:1917019]
ENSMUSG00000013736	32.5583	0.60231	0.940252	0.640584	0.521793	0.999653	Trnt1	tRNA nucleotidyl transferase, CCA-adding, 1 [Source:MGI Symbol;Acc:MGI:1917297]
ENSMUSG00000013766	0.559052	1.24326	6.11102	0.203446	0.838786	NA	Ly6g6e	lymphocyte antigen 6 family member G6E [Source:MGI Symbol;Acc:MGI:1917524]
ENSMUSG00000013787	402.471	-0.724612	1.67954	-0.431434	0.666153	0.999653	Ehmt2	euchromatic histone lysine N-methyltransferase 2 [Source:MGI Symbol;Acc:MGI:2148922]
ENSMUSG00000013822	43.033	-0.951727	1.71808	-0.553949	0.579614	0.999653	Elof1	ELF1 homolog, elongation factor 1 [Source:MGI Symbol;Acc:MGI:1913376]
ENSMUSG00000013833	62.2617	-0.249249	1.70706	-0.14601	0.883913	0.999653	Med16	mediator complex subunit 16 [Source:MGI Symbol;Acc:MGI:2158394]
ENSMUSG00000013846	0.24373	-1.23175	6.18624	-0.199112	0.842175	NA	St3gal1	ST3 beta-galactoside alpha-2,3-sialyltransferase 1 [Source:MGI Symbol;Acc:MGI:98304]
ENSMUSG00000013858	34.9022	2.05206	1.55191	1.32228	0.186073	0.790429	Tmem259	transmembrane protein 259 [Source:MGI Symbol;Acc:MGI:2177957]
ENSMUSG00000013878	1.17445	5.11671	3.38768	1.51039	0.130944	NA	Rnf170	ring finger protein 170 [Source:MGI Symbol;Acc:MGI:1924983]
ENSMUSG00000013921	3.66856	-0.262403	2.49141	-0.105323	0.916119	NA	Clip3	CAP-GLY domain containing linker protein 3 [Source:MGI Symbol;Acc:MGI:1923936]
ENSMUSG00000013936	0.821625	-0.833507	5.64881	-0.147554	0.882694	NA	Myl2	myosin, light polypeptide 2, regulatory, cardiac, slow [Source:MGI Symbol;Acc:MGI:97272]
ENSMUSG00000013973	41.413	-0.708579	1.75133	-0.404594	0.685776	0.999653	Dedd	death effector domain-containing [Source:MGI Symbol;Acc:MGI:1333874]
ENSMUSG00000013974	0.134334	-0.345655	6.23278	-0.0554576	0.955774	NA	Mcemp1	mast cell expressed membrane protein 1 [Source:MGI Symbol;Acc:MGI:1916439]
ENSMUSG00000013997	270.897	0.225574	0.331236	0.681006	0.495868	0.999653	Nit1	nitrilase 1 [Source:MGI Symbol;Acc:MGI:1350916]
ENSMUSG00000014030	12.4472	-1.43592	1.14087	-1.25861	0.20817	0.829904	Pax5	paired box 5 [Source:MGI Symbol;Acc:MGI:97489]
ENSMUSG00000014039	3.41575	-0.0381176	2.63988	-0.0144392	0.98848	NA	Prdm15	PR domain containing 15 [Source:MGI Symbol;Acc:MGI:1930121]
ENSMUSG00000014074	5.13019	1.01151	2.28027	0.443593	0.657337	NA	Rnf168	ring finger protein 168 [Source:MGI Symbol;Acc:MGI:1917488]
ENSMUSG00000014075	46.242	0.00675988	1.72099	0.00392791	0.996866	0.999653	Dynlt2b	dynein light chain Tctex-type 2B [Source:MGI Symbol;Acc:MGI:1913311]
ENSMUSG00000014077	4.00266	0.476136	2.32867	0.204467	0.837988	NA	Chp1	calcineurin-like EF hand protein 1 [Source:MGI Symbol;Acc:MGI:1927185]
ENSMUSG00000014104	0	NA	NA	NA	NA	NA	Sval2	seminal vesicle antigen-like 2 [Source:MGI Symbol;Acc:MGI:1934254]
ENSMUSG00000014158	0.0626476	0.10105	6.21635	0.0162555	0.987031	NA	Trpv4	transient receptor potential cation channel, subfamily V, member 4 [Source:MGI Symbol;Acc:MGI:1926945]
ENSMUSG00000014164	0.683163	-0.826148	4.65621	-0.177429	0.859171	NA	Klhl3	kelch-like 3 [Source:MGI Symbol;Acc:MGI:2445185]
ENSMUSG00000014177	5.89363	3.18717	1.70916	1.86476	0.0622149	NA	Tvp23b	trans-golgi network vesicle protein 23B [Source:MGI Symbol;Acc:MGI:1914760]
ENSMUSG00000014195	398.247	-0.424215	0.152212	-2.78701	0.00531973	0.0808799	Dnajc7	DnaJ heat shock protein family (Hsp40) member C7 [Source:MGI Symbol;Acc:MGI:1928373]
ENSMUSG00000014198	90.9156	0.673005	1.45222	0.463432	0.643055	0.999653	Zfp385c	zinc finger protein 385C [Source:MGI Symbol;Acc:MGI:3608347]
ENSMUSG00000014226	10.931	-0.227317	1.14707	-0.198172	0.842911	NA	Cacybp	calcyclin binding protein [Source:MGI Symbol;Acc:MGI:1270839]
ENSMUSG00000014232	44.1771	-0.5461	0.489999	-1.11449	0.265068	0.936724	Cluap1	clusterin associated protein 1 [Source:MGI Symbol;Acc:MGI:1924029]
ENSMUSG00000014243	43.0627	-0.164353	0.409875	-0.400983	0.688433	0.999653	Zswim7	zinc finger SWIM-type containing 7 [Source:MGI Symbol;Acc:MGI:1916997]
ENSMUSG00000014245	5.55435	2.2699	1.91017	1.18833	0.234704	NA	Pigl	phosphatidylinositol glycan anchor biosynthesis, class L [Source:MGI Symbol;Acc:MGI:2681271]
ENSMUSG00000014294	82.4878	0.42184	0.429301	0.982622	0.325794	0.999653	Ndufa2	NADH:ubiquinone oxidoreductase subunit A2 [Source:MGI Symbol;Acc:MGI:1343103]
ENSMUSG00000014301	1.13587	2.84907	4.9883	0.57115	0.567898	NA	Pam16	presequence translocase-asssociated motor 16 [Source:MGI Symbol;Acc:MGI:1913699]
ENSMUSG00000014303	0.166553	-2.79504	6.2191	-0.449429	0.653123	NA	Glis2	GLIS family zinc finger 2 [Source:MGI Symbol;Acc:MGI:1932535]
ENSMUSG00000014313	29.8159	-0.258006	1.75396	-0.1471	0.883053	0.999653	Cox6c	cytochrome c oxidase subunit 6C [Source:MGI Symbol;Acc:MGI:104614]
ENSMUSG00000014329	2.30973	-0.788384	2.53522	-0.310972	0.755822	NA	Bicc1	BicC family RNA binding protein 1 [Source:MGI Symbol;Acc:MGI:1933388]
ENSMUSG00000014349	34.872	0.994087	0.729031	1.36357	0.172702	0.764524	Ube2z	ubiquitin-conjugating enzyme E2Z [Source:MGI Symbol;Acc:MGI:1343160]
ENSMUSG00000014351	0.125295	0.625602	6.20439	0.100832	0.919684	NA	Gip	gastric inhibitory polypeptide [Source:MGI Symbol;Acc:MGI:107504]
ENSMUSG00000014353	4.71679	4.05654	2.00154	2.02671	0.0426917	NA	Tmem87b	transmembrane protein 87B [Source:MGI Symbol;Acc:MGI:1919727]
ENSMUSG00000014355	31.81	0.38825	0.553728	0.701157	0.483205	0.999653	Anapc1	anaphase promoting complex subunit 1 [Source:MGI Symbol;Acc:MGI:103097]
ENSMUSG00000014361	3.58713	2.33232	2.80039	0.832858	0.404925	NA	Mertk	MER proto-oncogene tyrosine kinase [Source:MGI Symbol;Acc:MGI:96965]
ENSMUSG00000014402	3.12505	-0.170788	2.73664	-0.0624081	0.950238	NA	Tsg101	tumor susceptibility gene 101 [Source:MGI Symbol;Acc:MGI:106581]
ENSMUSG00000014418	11.1061	-0.104046	1.89969	-0.0547702	0.956322	NA	Hps5	HPS5, biogenesis of lysosomal organelles complex 2 subunit 2 [Source:MGI Symbol;Acc:MGI:2180307]
ENSMUSG00000014426	5.13856	0.708166	2.26252	0.312998	0.754282	NA	Map3k4	mitogen-activated protein kinase kinase kinase 4 [Source:MGI Symbol;Acc:MGI:1346875]
ENSMUSG00000014444	0.476439	-0.377793	6.10217	-0.0619112	0.950634	NA	Piezo1	piezo-type mechanosensitive ion channel component 1 [Source:MGI Symbol;Acc:MGI:3603204]
ENSMUSG00000014453	11.1033	-1.41084	1.8885	-0.74707	0.455021	NA	Blk	B lymphoid kinase [Source:MGI Symbol;Acc:MGI:88169]
ENSMUSG00000014470	18.493	-0.588932	0.733726	-0.802659	0.422172	0.999653	Rnf166	ring finger protein 166 [Source:MGI Symbol;Acc:MGI:1915968]
ENSMUSG00000014496	29.4213	-0.310327	1.77987	-0.174354	0.861587	0.999653	Ankrd28	ankyrin repeat domain 28 [Source:MGI Symbol;Acc:MGI:2145661]
ENSMUSG00000014498	5.72488	1.25986	1.33838	0.941337	0.346532	NA	Ankrd52	ankyrin repeat domain 52 [Source:MGI Symbol;Acc:MGI:2444029]
ENSMUSG00000014503	263.06	0.133965	0.344976	0.38833	0.697771	0.999653	Pkd2l2	polycystic kidney disease 2-like 2 [Source:MGI Symbol;Acc:MGI:1858231]
ENSMUSG00000014504	5.06712	-0.595765	2.18563	-0.272583	0.785174	NA	Srp19	signal recognition particle 19 [Source:MGI Symbol;Acc:MGI:1913634]
ENSMUSG00000014529	32.0846	1.15478	1.66611	0.693103	0.488245	0.999653	Tmbim7	transmembrane BAX inhibitor motif containing 7 [Source:MGI Symbol;Acc:MGI:1922305]
ENSMUSG00000014542	0	NA	NA	NA	NA	NA	Clec4f	C-type lectin domain family 4, member f [Source:MGI Symbol;Acc:MGI:1859834]
ENSMUSG00000014543	0	NA	NA	NA	NA	NA	Klra17	killer cell lectin-like receptor, subfamily A, member 17 [Source:MGI Symbol;Acc:MGI:2180674]
ENSMUSG00000014547	7.3324	-0.606028	1.4437	-0.419774	0.674651	NA	Wdfy2	WD repeat and FYVE domain containing 2 [Source:MGI Symbol;Acc:MGI:2442811]
ENSMUSG00000014550	6.18756	-0.641488	1.43119	-0.448219	0.653995	NA	Rbsn	rabenosyn, RAB effector [Source:MGI Symbol;Acc:MGI:1925537]
ENSMUSG00000014551	7.47665	-1.45163	1.90729	-0.761092	0.446602	NA	Mrps25	mitochondrial ribosomal protein S25 [Source:MGI Symbol;Acc:MGI:1928140]
ENSMUSG00000014554	1.76049	1.04836	4.56824	0.229489	0.818489	NA	Dguok	deoxyguanosine kinase [Source:MGI Symbol;Acc:MGI:1351602]
ENSMUSG00000014592	7.27038	-0.00983659	2.06152	-0.00477152	0.996193	NA	Camta1	calmodulin binding transcription activator 1 [Source:MGI Symbol;Acc:MGI:2140230]
ENSMUSG00000014599	1.0278	4.38732	6.12647	0.716125	0.473914	NA	Csf1	colony stimulating factor 1 (macrophage) [Source:MGI Symbol;Acc:MGI:1339753]
ENSMUSG00000014601	4.04618	2.52521	2.86657	0.880919	0.378362	NA	Strip1	striatin interacting protein 1 [Source:MGI Symbol;Acc:MGI:2443884]
ENSMUSG00000014602	53.41	0.183781	1.71663	0.107059	0.914742	0.999653	Kif1a	kinesin family member 1A [Source:MGI Symbol;Acc:MGI:108391]
ENSMUSG00000014603	0	NA	NA	NA	NA	NA	Alx3	aristaless-like homeobox 3 [Source:MGI Symbol;Acc:MGI:1277097]
ENSMUSG00000014606	2.90179	2.31176	1.9314	1.19694	0.231331	NA	Slc25a11	solute carrier family 25 (mitochondrial carrier oxoglutarate carrier), member 11 [Source:MGI Symbol;Acc:MGI:1915113]
ENSMUSG00000014609	20.639	0.647304	1.77417	0.364849	0.715224	0.999653	Chrne	cholinergic receptor, nicotinic, epsilon polypeptide [Source:MGI Symbol;Acc:MGI:87894]
ENSMUSG00000014633	4.64487	-1.32963	2.83363	-0.469231	0.638904	NA	Cmc2	C-X9-C motif containing 2 [Source:MGI Symbol;Acc:MGI:1913781]
ENSMUSG00000014668	11.0698	-0.126097	2.04351	-0.0617059	0.950797	NA	Chfr	checkpoint with forkhead and ring finger domains [Source:MGI Symbol;Acc:MGI:2444898]
ENSMUSG00000014686	1.33578	-1.758	2.91853	-0.602358	0.546936	NA	Ceacam16	CEA cell adhesion molecule 16 [Source:MGI Symbol;Acc:MGI:2685615]
ENSMUSG00000014704	0.23815	-1.30109	6.23221	-0.208768	0.834629	NA	Hoxa2	homeobox A2 [Source:MGI Symbol;Acc:MGI:96174]
ENSMUSG00000014725	0	NA	NA	NA	NA	NA	Adam28	a disintegrin and metallopeptidase domain 28 [Source:MGI Symbol;Acc:MGI:105988]
ENSMUSG00000014747	45.15	-1.74364	0.670538	-2.60037	0.00931247	0.122106	Ankrd53	ankyrin repeat domain 53 [Source:MGI Symbol;Acc:MGI:1922555]
ENSMUSG00000014748	25.2889	-0.104976	0.589082	-0.178202	0.858564	0.999653	Tex261	testis expressed gene 261 [Source:MGI Symbol;Acc:MGI:1096575]
ENSMUSG00000014763	18.0768	-1.05885	1.85848	-0.569743	0.568852	0.999653	Fam120b	family with sequence similarity 120, member B [Source:MGI Symbol;Acc:MGI:1914794]
ENSMUSG00000014767	16.7838	-1.27068	1.88077	-0.675616	0.499285	0.999653	Tbp	TATA box binding protein [Source:MGI Symbol;Acc:MGI:101838]
ENSMUSG00000014769	31.1216	0.387619	1.73915	0.222878	0.823631	0.999653	Psmb1	proteasome (prosome, macropain) subunit, beta type 1 [Source:MGI Symbol;Acc:MGI:104884]
ENSMUSG00000014771	1.79461	3.59764	4.36268	0.824642	0.409575	NA	Pdcd2	programmed cell death 2 [Source:MGI Symbol;Acc:MGI:104643]
ENSMUSG00000014773	7.96373	-0.352002	1.97453	-0.178271	0.85851	NA	Dll1	delta like canonical Notch ligand 1 [Source:MGI Symbol;Acc:MGI:104659]
ENSMUSG00000014776	35.4602	-1.39718	1.74265	-0.801756	0.422694	0.999653	Nol3	nucleolar protein 3 (apoptosis repressor with CARD domain) [Source:MGI Symbol;Acc:MGI:1925938]
ENSMUSG00000014778	15.1697	2.26772	1.77701	1.27615	0.201903	0.821117	Fhod1	formin homology 2 domain containing 1 [Source:MGI Symbol;Acc:MGI:2679008]
ENSMUSG00000014782	11.0032	2.30017	1.24641	1.84544	0.0649739	NA	Plekhg4	pleckstrin homology domain containing, family G (with RhoGef domain) member 4 [Source:MGI Symbol;Acc:MGI:2142544]
ENSMUSG00000014786	30.7399	-0.283933	0.557678	-0.509135	0.610658	0.999653	Slc9a5	solute carrier family 9 (sodium/hydrogen exchanger), member 5 [Source:MGI Symbol;Acc:MGI:2685542]
ENSMUSG00000014791	34.1525	1.37043	0.550755	2.48828	0.0128362	0.154583	Elmo3	engulfment and cell motility 3 [Source:MGI Symbol;Acc:MGI:2679007]
ENSMUSG00000014813	82.7507	-0.648339	1.71178	-0.378751	0.704873	0.999653	Stc1	stanniocalcin 1 [Source:MGI Symbol;Acc:MGI:109131]
ENSMUSG00000014837	17.4461	-1.3675	0.827611	-1.65235	0.098463	0.570185	Matcap1	microtubule associated tyrosine carboxypeptidase 1 [Source:MGI Symbol;Acc:MGI:1921606]
ENSMUSG00000014846	7.0206	-0.739289	1.81998	-0.406207	0.68459	NA	Tppp3	tubulin polymerization-promoting protein family member 3 [Source:MGI Symbol;Acc:MGI:1915221]
ENSMUSG00000014850	8.96564	-0.0193997	1.93356	-0.0100331	0.991995	NA	Msh3	mutS homolog 3 [Source:MGI Symbol;Acc:MGI:109519]
ENSMUSG00000014852	0	NA	NA	NA	NA	NA	Adamts13	ADAM metallopeptidase with thrombospondin type 1 motif 13 [Source:MGI Symbol;Acc:MGI:2685556]
ENSMUSG00000014856	2.49408	1.00592	2.55253	0.394088	0.693516	NA	Tmem208	transmembrane protein 208 [Source:MGI Symbol;Acc:MGI:1913570]
ENSMUSG00000014859	23.8298	-1.51021	0.635431	-2.37666	0.01747	0.195022	E2f4	E2F transcription factor 4 [Source:MGI Symbol;Acc:MGI:103012]
ENSMUSG00000014867	110.688	0.714683	0.324154	2.20476	0.0274707	0.259715	Surf4	surfeit gene 4 [Source:MGI Symbol;Acc:MGI:98445]
ENSMUSG00000014873	3.31096	-0.0298048	2.20062	-0.0135438	0.989194	NA	Surf2	surfeit gene 2 [Source:MGI Symbol;Acc:MGI:98444]
ENSMUSG00000014905	53.0365	-1.37796	0.391266	-3.52179	0.000428649	0.00977382	Dnajb9	DnaJ heat shock protein family (Hsp40) member B9 [Source:MGI Symbol;Acc:MGI:1351618]
ENSMUSG00000014907	18.5943	-0.813538	0.790915	-1.0286	0.303666	0.998205	Naf1	nuclear assembly factor 1 ribonucleoprotein [Source:MGI Symbol;Acc:MGI:2682306]
ENSMUSG00000014932	4.83349	-2.10569	1.66544	-1.26435	0.206106	NA	Yes1	YES proto-oncogene 1, Src family tyrosine kinase [Source:MGI Symbol;Acc:MGI:99147]
ENSMUSG00000014956	19.7853	0.581222	0.891284	0.652118	0.514325	0.999653	Ppp1cb	protein phosphatase 1 catalytic subunit beta [Source:MGI Symbol;Acc:MGI:104871]
ENSMUSG00000014959	56.5544	-0.129582	1.71904	-0.0753803	0.939912	0.999653	Gorasp2	golgi reassembly stacking protein 2 [Source:MGI Symbol;Acc:MGI:2135962]
ENSMUSG00000014980	0.144155	0.673632	6.20176	0.108619	0.913504	NA	Tsen15	tRNA splicing endonuclease subunit 15 [Source:MGI Symbol;Acc:MGI:1913887]
ENSMUSG00000015001	0	NA	NA	NA	NA	NA	Oc90	otoconin 90 [Source:MGI Symbol;Acc:MGI:1313269]
ENSMUSG00000015002	33.2569	0.507792	0.546243	0.929608	0.352574	0.999653	Efr3a	EFR3 homolog A [Source:MGI Symbol;Acc:MGI:1923990]
ENSMUSG00000015013	21.4508	-0.0880005	0.681866	-0.129058	0.897311	0.999653	Trappc2l	trafficking protein particle complex 2L [Source:MGI Symbol;Acc:MGI:1916295]
ENSMUSG00000015016	10.4969	-1.31634	1.90078	-0.692525	0.488607	NA	Acsf3	acyl-CoA synthetase family member 3 [Source:MGI Symbol;Acc:MGI:2182591]
ENSMUSG00000015023	6.1777	-0.597353	1.39889	-0.427021	0.669364	NA	Ddx19a	DEAD box helicase 19a [Source:MGI Symbol;Acc:MGI:99526]
ENSMUSG00000015027	12.0835	-0.579877	1.44433	-0.401486	0.688063	0.999653	Galns	galactosamine (N-acetyl)-6-sulfatase [Source:MGI Symbol;Acc:MGI:1355303]
ENSMUSG00000015053	1.34745	1.2935	3.62568	0.35676	0.721271	NA	Gata2	GATA binding protein 2 [Source:MGI Symbol;Acc:MGI:95662]
ENSMUSG00000015083	57.2482	-0.375888	0.373966	-1.00514	0.31483	0.999653	C8g	complement component 8, gamma polypeptide [Source:MGI Symbol;Acc:MGI:88237]
ENSMUSG00000015085	1.95442	5.17565	5.19511	0.996254	0.319127	NA	Entpd2	ectonucleoside triphosphate diphosphohydrolase 2 [Source:MGI Symbol;Acc:MGI:1096863]
ENSMUSG00000015087	45.796	-0.422358	0.519615	-0.812829	0.416316	0.999653	Rabl6	RAB, member RAS oncogene family-like 6 [Source:MGI Symbol;Acc:MGI:2442633]
ENSMUSG00000015090	27.2628	1.64096	1.75024	0.937564	0.348469	0.999653	Ptgds	prostaglandin D2 synthase (brain) [Source:MGI Symbol;Acc:MGI:99261]
ENSMUSG00000015092	43.173	-0.524122	1.72556	-0.30374	0.761326	0.999653	Edf1	endothelial differentiation-related factor 1 [Source:MGI Symbol;Acc:MGI:1891227]
ENSMUSG00000015093	0	NA	NA	NA	NA	NA	Clic3	chloride intracellular channel 3 [Source:MGI Symbol;Acc:MGI:1916704]
ENSMUSG00000015094	0.347852	-2.77167	6.18242	-0.448315	0.653926	NA	Npdc1	neural proliferation, differentiation and control 1 [Source:MGI Symbol;Acc:MGI:1099802]
ENSMUSG00000015095	103.476	0.0862668	0.421379	0.204725	0.837787	0.999653	Fbxw5	F-box and WD-40 domain protein 5 [Source:MGI Symbol;Acc:MGI:1354731]
ENSMUSG00000015112	3.70916	-0.445149	2.35606	-0.188937	0.850142	NA	Slc25a13	solute carrier family 25 (mitochondrial carrier, adenine nucleotide translocator), member 13 [Source:MGI Symbol;Acc:MGI:1354721]
ENSMUSG00000015120	0.471147	3.28924	6.14536	0.53524	0.592484	NA	Ube2i	ubiquitin-conjugating enzyme E2I [Source:MGI Symbol;Acc:MGI:107365]
ENSMUSG00000015126	10.2865	-0.146979	0.977159	-0.150414	0.880438	NA	Tsr3	TSR3 20S rRNA accumulation [Source:MGI Symbol;Acc:MGI:1915577]
ENSMUSG00000015127	2.95072	-3.36788	3.25851	-1.03356	0.301341	NA	Unkl	unkempt family like zinc finger [Source:MGI Symbol;Acc:MGI:1921404]
ENSMUSG00000015133	1.94577	-0.241179	2.14287	-0.112549	0.910388	NA	Lrrk1	leucine-rich repeat kinase 1 [Source:MGI Symbol;Acc:MGI:2142227]
ENSMUSG00000015134	0.755808	-4.54062	5.75859	-0.788494	0.430408	NA	Aldh1a3	aldehyde dehydrogenase family 1, subfamily A3 [Source:MGI Symbol;Acc:MGI:1861722]
ENSMUSG00000015143	2.93179	0.337254	2.43619	0.138435	0.889897	NA	Actn1	actinin, alpha 1 [Source:MGI Symbol;Acc:MGI:2137706]
ENSMUSG00000015149	162.508	-0.268587	1.68118	-0.159761	0.873069	0.999653	Sirt2	sirtuin 2 [Source:MGI Symbol;Acc:MGI:1927664]
ENSMUSG00000015165	81.2369	0.26881	1.69982	0.15814	0.874346	0.999653	Hnrnpl	heterogeneous nuclear ribonucleoprotein L [Source:MGI Symbol;Acc:MGI:104816]
ENSMUSG00000015176	23.3581	1.49172	1.67509	0.890531	0.373181	0.999653	Nolc1	nucleolar and coiled-body phosphoprotein 1 [Source:MGI Symbol;Acc:MGI:1918019]
ENSMUSG00000015189	14.7714	-0.853944	0.88871	-0.96088	0.336612	0.999653	Casd1	CAS1 domain containing 1 [Source:MGI Symbol;Acc:MGI:2384865]
ENSMUSG00000015202	6.97885	-0.31948	1.42408	-0.224342	0.822491	NA	Cnksr3	Cnksr family member 3 [Source:MGI Symbol;Acc:MGI:2674130]
ENSMUSG00000015214	3.61333	0.43704	2.81169	0.155437	0.876477	NA	Mtmr1	myotubularin related protein 1 [Source:MGI Symbol;Acc:MGI:1858271]
ENSMUSG00000015217	0	NA	NA	NA	NA	NA	Hmgb3	high mobility group box 3 [Source:MGI Symbol;Acc:MGI:1098219]
ENSMUSG00000015222	107.261	-0.325132	1.68817	-0.192595	0.847276	0.999653	Map2	microtubule-associated protein 2 [Source:MGI Symbol;Acc:MGI:97175]
ENSMUSG00000015224	0.78595	1.73004	4.43551	0.390043	0.696505	NA	Cyp2j9	cytochrome P450, family 2, subfamily j, polypeptide 9 [Source:MGI Symbol;Acc:MGI:1921769]
ENSMUSG00000015242	17.4657	-0.394625	1.82437	-0.216308	0.828748	0.999653	Nipsnap3a	nipsnap homolog 3A [Source:MGI Symbol;Acc:MGI:1920648]
ENSMUSG00000015243	47.7771	1.16634	0.485704	2.40134	0.0163351	0.186575	Abca1	ATP-binding cassette, sub-family A member 1 [Source:MGI Symbol;Acc:MGI:99607]
ENSMUSG00000015247	1.67312	-0.182319	4.19511	-0.0434599	0.965335	NA	Nipsnap3b	nipsnap homolog 3B [Source:MGI Symbol;Acc:MGI:1913786]
ENSMUSG00000015289	0.0626476	0.10105	6.21635	0.0162555	0.987031	NA	Lage3	L antigen family, member 3 [Source:MGI Symbol;Acc:MGI:1913442]
ENSMUSG00000015290	6.47945	-0.440418	2.11894	-0.207849	0.835347	NA	Ubl4a	ubiquitin-like 4A [Source:MGI Symbol;Acc:MGI:95049]
ENSMUSG00000015291	0.754248	-3.35326	6.12543	-0.547433	0.584082	NA	Gdi1	GDP dissociation inhibitor 1 [Source:MGI Symbol;Acc:MGI:99846]
ENSMUSG00000015305	18.4294	-0.0649995	0.898341	-0.072355	0.942319	0.999653	Sash1	SAM and SH3 domain containing 1 [Source:MGI Symbol;Acc:MGI:1917347]
ENSMUSG00000015312	2.10171	-1.117	2.10762	-0.529979	0.596126	NA	Gadd45b	growth arrest and DNA-damage-inducible 45 beta [Source:MGI Symbol;Acc:MGI:107776]
ENSMUSG00000015314	0	NA	NA	NA	NA	NA	Slamf6	SLAM family member 6 [Source:MGI Symbol;Acc:MGI:1353620]
ENSMUSG00000015316	0.278357	2.21203	6.17193	0.358402	0.720043	NA	Slamf1	signaling lymphocytic activation molecule family member 1 [Source:MGI Symbol;Acc:MGI:1351314]
ENSMUSG00000015335	10.5626	-0.165873	2.00011	-0.0829323	0.933905	NA	Zdhhc12	zinc finger, DHHC domain containing 12 [Source:MGI Symbol;Acc:MGI:1913470]
ENSMUSG00000015337	500.126	-0.0170445	1.67834	-0.0101556	0.991897	0.999653	Endog	endonuclease G [Source:MGI Symbol;Acc:MGI:1261433]
ENSMUSG00000015340	1.01581	-0.115916	4.02549	-0.0287955	0.977028	NA	Cybb	cytochrome b-245, beta polypeptide [Source:MGI Symbol;Acc:MGI:88574]
ENSMUSG00000015341	1.34085	-1.82559	4.69218	-0.389072	0.697223	NA	Golga7	golgin A7 [Source:MGI Symbol;Acc:MGI:1931029]
ENSMUSG00000015342	22.8139	-1.52505	0.656405	-2.32334	0.0201609	0.213324	Xk	X-linked Kx blood group [Source:MGI Symbol;Acc:MGI:103569]
ENSMUSG00000015354	3.09705	0.531551	2.7938	0.190261	0.849105	NA	Pcolce2	procollagen C-endopeptidase enhancer 2 [Source:MGI Symbol;Acc:MGI:1923727]
ENSMUSG00000015355	0.108116	0.410948	6.21079	0.0661668	0.947245	NA	Cd48	CD48 antigen [Source:MGI Symbol;Acc:MGI:88339]
ENSMUSG00000015357	116.532	-0.271404	1.68648	-0.16093	0.872149	0.999653	Clpx	caseinolytic mitochondrial matrix peptidase chaperone subunit [Source:MGI Symbol;Acc:MGI:1346017]
ENSMUSG00000015363	16.4661	0.540491	1.31779	0.410148	0.681697	0.999653	Trabd	TraB domain containing [Source:MGI Symbol;Acc:MGI:1915226]
ENSMUSG00000015365	31.4838	-2.19782	1.65795	-1.32562	0.184965	0.788964	Mov10l1	Mov10 like RISC complex RNA helicase 1 [Source:MGI Symbol;Acc:MGI:1891384]
ENSMUSG00000015377	40.1545	-0.455803	1.72302	-0.264538	0.791366	0.999653	Dennd6b	DENN domain containing 6B [Source:MGI Symbol;Acc:MGI:1916690]
ENSMUSG00000015396	0.188965	0.871267	6.20398	0.140437	0.888315	NA	Cd83	CD83 antigen [Source:MGI Symbol;Acc:MGI:1328316]
ENSMUSG00000015401	0	NA	NA	NA	NA	NA	Cltrn	collectrin, amino acid transport regulator [Source:MGI Symbol;Acc:MGI:1926234]
ENSMUSG00000015405	0.288311	1.48801	6.1707	0.241142	0.809445	NA	Ace2	angiotensin converting enzyme 2 [Source:MGI Symbol;Acc:MGI:1917258]
ENSMUSG00000015437	1.30192	2.04714	4.10922	0.498182	0.618356	NA	Gzmb	granzyme B [Source:MGI Symbol;Acc:MGI:109267]
ENSMUSG00000015441	2.6596	-0.803242	2.72794	-0.29445	0.768414	NA	Gzmf	granzyme F [Source:MGI Symbol;Acc:MGI:109254]
ENSMUSG00000015443	31.5558	-0.843336	1.7316	-0.487028	0.626239	0.999653	Gzmn	granzyme N [Source:MGI Symbol;Acc:MGI:2675494]
ENSMUSG00000015451	0.163883	1.44967	6.16823	0.235023	0.814191	NA	C4a	complement C4A (Rodgers blood group) [Source:MGI Symbol;Acc:MGI:98320]
ENSMUSG00000015452	0	NA	NA	NA	NA	NA	Ager	advanced glycosylation end product-specific receptor [Source:MGI Symbol;Acc:MGI:893592]
ENSMUSG00000015461	11.5343	-0.998015	1.32658	-0.752324	0.451856	0.999653	Atf6b	activating transcription factor 6 beta [Source:MGI Symbol;Acc:MGI:105121]
ENSMUSG00000015467	0	NA	NA	NA	NA	NA	Egfl8	EGF-like domain 8 [Source:MGI Symbol;Acc:MGI:1932094]
ENSMUSG00000015468	2.69168	1.13512	2.10203	0.540012	0.589189	NA	Notch4	notch 4 [Source:MGI Symbol;Acc:MGI:107471]
ENSMUSG00000015474	0.594467	3.35976	6.13284	0.547831	0.583808	NA	Ppt2	palmitoyl-protein thioesterase 2 [Source:MGI Symbol;Acc:MGI:1860075]
ENSMUSG00000015476	0.325159	-3.85701	6.17478	-0.62464	0.532207	NA	Prrt1	proline-rich transmembrane protein 1 [Source:MGI Symbol;Acc:MGI:1932118]
ENSMUSG00000015478	2.2341	0.83334	3.13008	0.266236	0.790058	NA	Rnf5	ring finger protein 5 [Source:MGI Symbol;Acc:MGI:1860076]
ENSMUSG00000015484	0.960018	-0.425946	5.22548	-0.0815133	0.935034	NA	Fam163a	family with sequence similarity 163, member A [Source:MGI Symbol;Acc:MGI:3618859]
ENSMUSG00000015488	1.48427	-1.26185	5.13746	-0.245617	0.805978	NA	Cacfd1	calcium channel flower domain containing 1 [Source:MGI Symbol;Acc:MGI:1924317]
ENSMUSG00000015501	1.40448	-0.720267	3.60046	-0.200049	0.841442	NA	Hivep2	human immunodeficiency virus type I enhancer binding protein 2 [Source:MGI Symbol;Acc:MGI:1338076]
ENSMUSG00000015519	0	NA	NA	NA	NA	NA	2310057J18Rik	RIKEN cDNA 2310057J18 gene [Source:MGI Symbol;Acc:MGI:1914969]
ENSMUSG00000015522	4.05677	-0.884865	2.60761	-0.339339	0.734354	NA	Arnt	aryl hydrocarbon receptor nuclear translocator [Source:MGI Symbol;Acc:MGI:88071]
ENSMUSG00000015533	4.35466	1.28505	1.54575	0.831344	0.405779	NA	Itga2	integrin alpha 2 [Source:MGI Symbol;Acc:MGI:96600]
ENSMUSG00000015536	1.94522	-0.634632	2.79385	-0.227153	0.820305	NA	Mocs2	molybdenum cofactor synthesis 2 [Source:MGI Symbol;Acc:MGI:1336894]
ENSMUSG00000015542	71.6425	-0.256874	1.71695	-0.149611	0.881072	0.999653	Nat9	N-acetyltransferase 9 (GCN5-related, putative) [Source:MGI Symbol;Acc:MGI:1913426]
ENSMUSG00000015568	1.12198	-1.41873	5.6024	-0.253236	0.800085	NA	Lpl	lipoprotein lipase [Source:MGI Symbol;Acc:MGI:96820]
ENSMUSG00000015575	7.6175	0.247454	1.95164	0.126793	0.899104	NA	Atp6v0e	ATPase, H+ transporting, lysosomal V0 subunit E [Source:MGI Symbol;Acc:MGI:1328318]
ENSMUSG00000015579	0	NA	NA	NA	NA	NA	Nkx2-5	NK2 homeobox 5 [Source:MGI Symbol;Acc:MGI:97350]
ENSMUSG00000015597	111.899	0.088617	0.36757	0.241089	0.809486	0.999653	Zfp318	zinc finger protein 318 [Source:MGI Symbol;Acc:MGI:1889348]
ENSMUSG00000015599	947.378	-1.66601	0.141926	-11.7386	8.08e-32	2.09e-29	Ttbk1	tau tubulin kinase 1 [Source:MGI Symbol;Acc:MGI:2147036]
ENSMUSG00000015605	34.0991	-1.35004	0.60533	-2.23026	0.0257303	0.24762	Srf	serum response factor [Source:MGI Symbol;Acc:MGI:106658]
ENSMUSG00000015619	2.18087	-2.93281	2.74664	-1.06778	0.28562	NA	Gata3	GATA binding protein 3 [Source:MGI Symbol;Acc:MGI:95663]
ENSMUSG00000015627	0	NA	NA	NA	NA	NA	Gata5	GATA binding protein 5 [Source:MGI Symbol;Acc:MGI:109497]
ENSMUSG00000015647	22.8052	0.222425	0.70279	0.316489	0.751631	0.999653	Lama5	laminin, alpha 5 [Source:MGI Symbol;Acc:MGI:105382]
ENSMUSG00000015652	0.289179	2.08898	6.15198	0.339563	0.734186	NA	Steap1	six transmembrane epithelial antigen of the prostate 1 [Source:MGI Symbol;Acc:MGI:1917608]
ENSMUSG00000015653	0.222736	-1.28349	6.18794	-0.207418	0.835683	NA	Steap2	six transmembrane epithelial antigen of prostate 2 [Source:MGI Symbol;Acc:MGI:1921301]
ENSMUSG00000015656	3.0097	3.48706	2.81759	1.23761	0.215862	NA	Hspa8	heat shock protein 8 [Source:MGI Symbol;Acc:MGI:105384]
ENSMUSG00000015659	4.83266	-0.294302	2.40541	-0.12235	0.902622	NA	Serac1	serine active site containing 1 [Source:MGI Symbol;Acc:MGI:2447813]
ENSMUSG00000015665	0	NA	NA	NA	NA	NA	Awat1	acyl-CoA wax alcohol acyltransferase 1 [Source:MGI Symbol;Acc:MGI:3588200]
ENSMUSG00000015668	10.5229	0.567092	1.07027	0.529859	0.59621	NA	Pdzd11	PDZ domain containing 11 [Source:MGI Symbol;Acc:MGI:1919871]
ENSMUSG00000015671	15.2273	-1.111	1.3318	-0.834209	0.404163	0.999653	Psma2	proteasome subunit alpha 2 [Source:MGI Symbol;Acc:MGI:104885]
ENSMUSG00000015672	2.92744	-1.32294	3.34908	-0.395016	0.692831	NA	Mrpl32	mitochondrial ribosomal protein L32 [Source:MGI Symbol;Acc:MGI:2137226]
ENSMUSG00000015697	30.5561	0.0599699	1.75997	0.0340745	0.972818	0.999653	Setdb1	SET domain, bifurcated 1 [Source:MGI Symbol;Acc:MGI:1934229]
ENSMUSG00000015702	2.15306	2.73708	4.24787	0.644342	0.519354	NA	Anxa9	annexin A9 [Source:MGI Symbol;Acc:MGI:1923711]
ENSMUSG00000015709	1.12986	-1.12607	5.21289	-0.216016	0.828975	NA	Arnt2	aryl hydrocarbon receptor nuclear translocator 2 [Source:MGI Symbol;Acc:MGI:107188]
ENSMUSG00000015711	17.1191	1.64088	0.980373	1.67373	0.0941829	0.552101	Prune1	prune exopolyphosphatase [Source:MGI Symbol;Acc:MGI:1925152]
ENSMUSG00000015714	23.1091	1.47428	0.836442	1.76255	0.0779756	0.498048	Cers2	ceramide synthase 2 [Source:MGI Symbol;Acc:MGI:1924143]
ENSMUSG00000015721	0.231828	-1.37014	6.16939	-0.222087	0.824246	NA	Nlrp5	NLR family, pyrin domain containing 5 [Source:MGI Symbol;Acc:MGI:1345193]
ENSMUSG00000015733	6.64132	-0.421203	1.49882	-0.281023	0.778693	NA	Capza2	capping actin protein of muscle Z-line subunit alpha 2 [Source:MGI Symbol;Acc:MGI:106222]
ENSMUSG00000015745	50.4616	-2.42492	1.54715	-1.56735	0.117034	0.624113	Plekho1	pleckstrin homology domain containing, family O member 1 [Source:MGI Symbol;Acc:MGI:1914470]
ENSMUSG00000015747	12.9671	1.00579	1.41265	0.711989	0.476471	0.999653	Vps45	vacuolar protein sorting 45 [Source:MGI Symbol;Acc:MGI:891965]
ENSMUSG00000015748	8.01558	0.162462	1.72962	0.093929	0.925166	NA	Prpf3	pre-mRNA processing factor 3 [Source:MGI Symbol;Acc:MGI:1918017]
ENSMUSG00000015749	4.13127	0.471885	2.22027	0.212535	0.83169	NA	Anp32e	acidic nuclear phosphoprotein 32 family member E [Source:MGI Symbol;Acc:MGI:1913721]
ENSMUSG00000015750	0.715998	-8.79774	6.13403	-1.43425	0.151501	NA	Aph1a	aph1 homolog A, gamma secretase subunit [Source:MGI Symbol;Acc:MGI:2385110]
ENSMUSG00000015755	1.48865	-1.08613	3.155	-0.344258	0.730652	NA	Tab2	TGF-beta activated kinase 1/MAP3K7 binding protein 2 [Source:MGI Symbol;Acc:MGI:1915902]
ENSMUSG00000015757	15.1122	0.946659	0.87207	1.08553	0.277687	0.956785	Ppil4	peptidylprolyl isomerase (cyclophilin)-like 4 [Source:MGI Symbol;Acc:MGI:1914668]
ENSMUSG00000015759	1.93619	0.667605	2.28976	0.291561	0.770623	NA	Cnih1	cornichon family AMPA receptor auxiliary protein 1 [Source:MGI Symbol;Acc:MGI:1277202]
ENSMUSG00000015766	6.75109	1.43173	2.17054	0.659618	0.509499	NA	Eps8	epidermal growth factor receptor pathway substrate 8 [Source:MGI Symbol;Acc:MGI:104684]
ENSMUSG00000015776	7.39195	-1.23022	2.12075	-0.580089	0.561855	NA	Med22	mediator complex subunit 22 [Source:MGI Symbol;Acc:MGI:98446]
ENSMUSG00000015787	0.216233	1.11289	6.18503	0.179932	0.857206	NA	Abo	ABO, alpha 1-3-N-acetylgalactosaminyltransferase and alpha 1-3-galactosyltransferase [Source:MGI Symbol;Acc:MGI:2135738]
ENSMUSG00000015790	3.82562	-2.71402	1.99353	-1.36141	0.173384	NA	Surf1	surfeit gene 1 [Source:MGI Symbol;Acc:MGI:98443]
ENSMUSG00000015804	63.573	-0.0187604	1.7136	-0.0109479	0.991265	0.999653	Med28	mediator complex subunit 28 [Source:MGI Symbol;Acc:MGI:1914249]
ENSMUSG00000015806	9.14075	0.857846	1.93905	0.442406	0.658196	NA	Qdpr	quinoid dihydropteridine reductase [Source:MGI Symbol;Acc:MGI:97836]
ENSMUSG00000015812	0	NA	NA	NA	NA	NA	Gnrh1	gonadotropin releasing hormone 1 [Source:MGI Symbol;Acc:MGI:95789]
ENSMUSG00000015829	0	NA	NA	NA	NA	NA	Tnr	tenascin R [Source:MGI Symbol;Acc:MGI:99516]
ENSMUSG00000015837	108.69	0.0698246	0.293969	0.237523	0.812251	0.999653	Sqstm1	sequestosome 1 [Source:MGI Symbol;Acc:MGI:107931]
ENSMUSG00000015839	16.5482	0.459282	0.778959	0.58961	0.555452	0.999653	Nfe2l2	nuclear factor, erythroid derived 2, like 2 [Source:MGI Symbol;Acc:MGI:108420]
ENSMUSG00000015843	1.6409	1.3332	4.7598	0.280095	0.779404	NA	Rxrg	retinoid X receptor gamma [Source:MGI Symbol;Acc:MGI:98216]
ENSMUSG00000015846	13.972	0.520353	1.61416	0.322368	0.747174	0.999653	Rxra	retinoid X receptor alpha [Source:MGI Symbol;Acc:MGI:98214]
ENSMUSG00000015850	0.205141	-1.79599	6.20659	-0.289369	0.772299	NA	Adamtsl4	ADAMTS-like 4 [Source:MGI Symbol;Acc:MGI:2389008]
ENSMUSG00000015852	1.12376	1.1059	4.02264	0.274919	0.783378	NA	Fcrl2	Fc receptor like 2 [Source:MGI Symbol;Acc:MGI:1933397]
ENSMUSG00000015854	7.76027	3.69839	1.95444	1.8923	0.0584507	NA	Cd5l	CD5 antigen-like [Source:MGI Symbol;Acc:MGI:1334419]
ENSMUSG00000015869	12.9649	-0.0999492	1.83861	-0.0543613	0.956647	0.999653	Prpsap1	phosphoribosyl pyrophosphate synthetase-associated protein 1 [Source:MGI Symbol;Acc:MGI:1915013]
ENSMUSG00000015879	4.45081	0.600388	1.79166	0.335102	0.737548	NA	Fam184b	family with sequence similarity 184, member B [Source:MGI Symbol;Acc:MGI:2442958]
ENSMUSG00000015880	41.7317	0.138762	0.582985	0.238019	0.811866	0.999653	Ncapg	non-SMC condensin I complex, subunit G [Source:MGI Symbol;Acc:MGI:1930197]
ENSMUSG00000015882	16.9342	0.267744	1.90394	0.140626	0.888165	0.999653	Lcorl	ligand dependent nuclear receptor corepressor-like [Source:MGI Symbol;Acc:MGI:2651932]
ENSMUSG00000015889	9.10504	1.34697	1.59187	0.846151	0.397469	NA	Lta4h	leukotriene A4 hydrolase [Source:MGI Symbol;Acc:MGI:96836]
ENSMUSG00000015890	0.365782	-2.3279	6.19862	-0.375551	0.707251	NA	Amdhd1	amidohydrolase domain containing 1 [Source:MGI Symbol;Acc:MGI:1919011]
ENSMUSG00000015932	28.8211	-0.219409	0.557361	-0.393657	0.693834	0.999653	Dstn	destrin [Source:MGI Symbol;Acc:MGI:1929270]
ENSMUSG00000015937	12.2306	-0.203503	1.8341	-0.110955	0.911652	0.999653	Macroh2a1	macroH2A.1 histone [Source:MGI Symbol;Acc:MGI:1349392]
ENSMUSG00000015942	16.8058	-0.0718165	0.922759	-0.077828	0.937965	0.999653	Gtf2ird2	GTF2I repeat domain containing 2 [Source:MGI Symbol;Acc:MGI:2149780]
ENSMUSG00000015943	9.10284	-1.08168	1.94229	-0.556913	0.577587	NA	Bola1	bolA family member 1 [Source:MGI Symbol;Acc:MGI:1916418]
ENSMUSG00000015944	4.67836	2.73323	2.05799	1.3281	0.184144	NA	Castor2	cytosolic arginine sensor for mTORC1 subunit 2 [Source:MGI Symbol;Acc:MGI:1933384]
ENSMUSG00000015947	0.869281	3.57396	4.55369	0.784848	0.432543	NA	Fcgr1	Fc receptor, IgG, high affinity I [Source:MGI Symbol;Acc:MGI:95498]
ENSMUSG00000015950	0	NA	NA	NA	NA	NA	Ncf1	neutrophil cytosolic factor 1 [Source:MGI Symbol;Acc:MGI:97283]
ENSMUSG00000015957	0.693213	1.7535	6.13502	0.285817	0.775018	NA	Wnt11	wingless-type MMTV integration site family, member 11 [Source:MGI Symbol;Acc:MGI:101948]
ENSMUSG00000015961	35.3085	0.362491	0.603906	0.600244	0.548344	0.999653	Adss2	adenylosuccinate synthase 2 [Source:MGI Symbol;Acc:MGI:87948]
ENSMUSG00000015962	70.6032	-0.0032266	0.356872	-0.00904132	0.992786	0.999653	Spmip3	sperm microtubule inner protein 3 [Source:MGI Symbol;Acc:MGI:1916678]
ENSMUSG00000015966	0.248324	2.16319	6.14883	0.351805	0.724984	NA	Il17rb	interleukin 17 receptor B [Source:MGI Symbol;Acc:MGI:1355292]
ENSMUSG00000015968	13.5376	-0.793008	1.83107	-0.433085	0.664953	0.999653	Cacna1d	calcium channel, voltage-dependent, L type, alpha 1D subunit [Source:MGI Symbol;Acc:MGI:88293]
ENSMUSG00000015970	37.7667	0.811138	0.572412	1.41705	0.156467	0.73073	Chdh	choline dehydrogenase [Source:MGI Symbol;Acc:MGI:1860776]
ENSMUSG00000015971	17.5244	0.0263304	1.83916	0.0143165	0.988577	0.999653	Actr8	ARP8 actin-related protein 8 [Source:MGI Symbol;Acc:MGI:1860775]
ENSMUSG00000015980	376.997	0.475471	1.60196	0.296807	0.766614	0.999653	Lrrc27	leucine rich repeat containing 27 [Source:MGI Symbol;Acc:MGI:1923862]
ENSMUSG00000015981	1.80256	-1.34484	2.91072	-0.462032	0.644058	NA	Stk32c	serine/threonine kinase 32C [Source:MGI Symbol;Acc:MGI:2385336]
ENSMUSG00000015994	35.8133	0.587554	0.605896	0.969727	0.332183	0.999653	Fnta	farnesyltransferase, CAAX box, alpha [Source:MGI Symbol;Acc:MGI:104683]
ENSMUSG00000016018	426	-0.24429	0.22109	-1.10494	0.269187	0.942948	Mtrex	Mtr4 exosome RNA helicase [Source:MGI Symbol;Acc:MGI:1919448]
ENSMUSG00000016024	2.42582	1.97144	2.61616	0.753565	0.45111	NA	Lbp	lipopolysaccharide binding protein [Source:MGI Symbol;Acc:MGI:1098776]
ENSMUSG00000016028	0.645636	2.11341	5.15694	0.409818	0.68194	NA	Celsr1	cadherin, EGF LAG seven-pass G-type receptor 1 [Source:MGI Symbol;Acc:MGI:1100883]
ENSMUSG00000016087	0.310704	0.7834	6.19638	0.126429	0.899393	NA	Fli1	Friend leukemia integration 1 [Source:MGI Symbol;Acc:MGI:95554]
ENSMUSG00000016128	5.49919	2.09338	2.30517	0.908124	0.363813	NA	Stard13	StAR related lipid transfer domain containing 13 [Source:MGI Symbol;Acc:MGI:2385331]
ENSMUSG00000016150	0	NA	NA	NA	NA	NA	Tenm1	teneurin transmembrane protein 1 [Source:MGI Symbol;Acc:MGI:1345185]
ENSMUSG00000016179	2.05351	0.415274	2.95249	0.140652	0.888145	NA	Camk1g	calcium/calmodulin-dependent protein kinase I gamma [Source:MGI Symbol;Acc:MGI:2388073]
ENSMUSG00000016181	2.25879	0.834068	4.33346	0.192472	0.847373	NA	Utp25	UTP25 small subunit processome component [Source:MGI Symbol;Acc:MGI:2138080]
ENSMUSG00000016194	0.444997	0.423203	6.14121	0.0689119	0.94506	NA	Hsd11b1	hydroxysteroid 11-beta dehydrogenase 1 [Source:MGI Symbol;Acc:MGI:103562]
ENSMUSG00000016200	2.32986	-0.930817	2.59426	-0.358798	0.719746	NA	Syt14	synaptotagmin XIV [Source:MGI Symbol;Acc:MGI:2444490]
ENSMUSG00000016206	0.925644	16.5516	6.06925	2.72712	0.00638898	NA	H2-M3	histocompatibility 2, M region locus 3 [Source:MGI Symbol;Acc:MGI:95915]
ENSMUSG00000016239	12.952	0.129148	0.883945	0.146104	0.883839	0.999653	Lonrf3	LON peptidase N-terminal domain and ring finger 3 [Source:MGI Symbol;Acc:MGI:1921615]
ENSMUSG00000016252	150.316	0.274331	1.68764	0.162553	0.87087	0.999653	Atp5f1e	ATP synthase F1 subunit epsilon [Source:MGI Symbol;Acc:MGI:1855697]
ENSMUSG00000016253	11.0552	-0.19796	1.95719	-0.101145	0.919435	NA	Nelfcd	negative elongation factor complex member C/D, Th1l [Source:MGI Symbol;Acc:MGI:1926424]
ENSMUSG00000016255	0.123517	0.613591	6.23255	0.0984495	0.921575	NA	Tubb1	tubulin, beta 1 class VI [Source:MGI Symbol;Acc:MGI:107814]
ENSMUSG00000016256	6.5974	0.582613	1.53123	0.380487	0.703584	NA	Ctsz	cathepsin Z [Source:MGI Symbol;Acc:MGI:1891190]
ENSMUSG00000016257	4.6681	3.09092	1.86956	1.65329	0.0982726	NA	Prelid3b	PRELI domain containing 3B [Source:MGI Symbol;Acc:MGI:1913640]
ENSMUSG00000016262	0.37374	0.61411	6.13664	0.100073	0.920287	NA	Sertad4	SERTA domain containing 4 [Source:MGI Symbol;Acc:MGI:2443496]
ENSMUSG00000016283	0	NA	NA	NA	NA	NA	H2-M2	histocompatibility 2, M region locus 2 [Source:MGI Symbol;Acc:MGI:95914]
ENSMUSG00000016308	1.16995	2.19925	3.89971	0.563951	0.572787	NA	Ube2a	ubiquitin-conjugating enzyme E2A [Source:MGI Symbol;Acc:MGI:102959]
ENSMUSG00000016319	1.29994	-5.19958	5.30325	-0.980451	0.326864	NA	Slc25a5	solute carrier family 25 (mitochondrial carrier, adenine nucleotide translocator), member 5 [Source:MGI Symbol;Acc:MGI:1353496]
ENSMUSG00000016327	0	NA	NA	NA	NA	NA	Atp1b4	ATPase Na+/K+ transporting, beta 4 polypeptide [Source:MGI Symbol;Acc:MGI:1915071]
ENSMUSG00000016344	0	NA	NA	NA	NA	NA	Ppdpf	pancreatic progenitor cell differentiation and proliferation factor [Source:MGI Symbol;Acc:MGI:1913746]
ENSMUSG00000016346	3.71634	-2.34206	2.5385	-0.922617	0.356207	NA	Kcnq2	potassium voltage-gated channel, subfamily Q, member 2 [Source:MGI Symbol;Acc:MGI:1309503]
ENSMUSG00000016349	0.57847	0.208014	6.17806	0.0336697	0.973141	NA	Eef1a2	eukaryotic translation elongation factor 1 alpha 2 [Source:MGI Symbol;Acc:MGI:1096317]
ENSMUSG00000016356	82.3994	-2.09255	1.67902	-1.2463	0.212656	0.840059	Col20a1	collagen, type XX, alpha 1 [Source:MGI Symbol;Acc:MGI:1920618]
ENSMUSG00000016382	4.52414	0.605815	2.27882	0.265846	0.790358	NA	Pls3	plastin 3 (T-isoform) [Source:MGI Symbol;Acc:MGI:104807]
ENSMUSG00000016386	0.144155	0.673632	6.20176	0.108619	0.913504	NA	Mpped2	metallophosphoesterase domain containing 2 [Source:MGI Symbol;Acc:MGI:1924265]
ENSMUSG00000016409	5.76345	-2.38458	1.98484	-1.20139	0.229598	NA	Nkap	NFKB activating protein [Source:MGI Symbol;Acc:MGI:1914300]
ENSMUSG00000016427	8.04562	-0.825257	1.20346	-0.685736	0.492879	NA	Ndufa1	NADH:ubiquinone oxidoreductase subunit A1 [Source:MGI Symbol;Acc:MGI:1929511]
ENSMUSG00000016458	13.7676	-0.352077	1.81788	-0.193675	0.84643	0.999653	Wt1	WT1 transcription factor [Source:MGI Symbol;Acc:MGI:98968]
ENSMUSG00000016477	0.366742	3.46644	6.13918	0.564643	0.572317	NA	E2f3	E2F transcription factor 3 [Source:MGI Symbol;Acc:MGI:1096340]
ENSMUSG00000016481	0.890241	-0.365323	6.1197	-0.0596963	0.952398	NA	Cr1l	complement C3b/C4b receptor 1 like [Source:MGI Symbol;Acc:MGI:88513]
ENSMUSG00000016487	6.64741	0.782027	2.21296	0.353385	0.7238	NA	Ppfibp1	PTPRF interacting protein, binding protein 1 (liprin beta 1) [Source:MGI Symbol;Acc:MGI:1914783]
ENSMUSG00000016493	15.56	0.330128	1.86232	0.177267	0.859299	0.999653	Cd46	CD46 antigen, complement regulatory protein [Source:MGI Symbol;Acc:MGI:1203290]
ENSMUSG00000016494	2.58625	3.44678	4.01597	0.858268	0.390745	NA	Cd34	CD34 antigen [Source:MGI Symbol;Acc:MGI:88329]
ENSMUSG00000016495	0.90277	1.1731	6.07686	0.193044	0.846925	NA	Plgrkt	plasminogen receptor, C-terminal lysine transmembrane protein [Source:MGI Symbol;Acc:MGI:1915009]
ENSMUSG00000016496	0.9666	-2.26397	5.38112	-0.420725	0.673956	NA	Cd274	CD274 antigen [Source:MGI Symbol;Acc:MGI:1926446]
ENSMUSG00000016498	0.0360388	-0.360287	6.23144	-0.0578176	0.953894	NA	Pdcd1lg2	programmed cell death 1 ligand 2 [Source:MGI Symbol;Acc:MGI:1930125]
ENSMUSG00000016503	1.85605	-0.115019	3.13602	-0.0366768	0.970743	NA	Gtf3a	general transcription factor III A [Source:MGI Symbol;Acc:MGI:1913846]
ENSMUSG00000016510	3.54719	-0.776904	2.32988	-0.333453	0.738792	NA	Mtif3	mitochondrial translational initiation factor 3 [Source:MGI Symbol;Acc:MGI:1923616]
ENSMUSG00000016520	25.842	0.836138	1.10969	0.753488	0.451157	0.999653	Lnx2	ligand of numb-protein X 2 [Source:MGI Symbol;Acc:MGI:2155959]
ENSMUSG00000016524	0	NA	NA	NA	NA	NA	Il19	interleukin 19 [Source:MGI Symbol;Acc:MGI:1890472]
ENSMUSG00000016526	167.922	0.22502	0.240523	0.935546	0.349507	0.999653	Dyrk3	dual-specificity tyrosine phosphorylation regulated kinase 3 [Source:MGI Symbol;Acc:MGI:1330300]
ENSMUSG00000016528	12.6119	3.99898	1.41154	2.83307	0.00461035	0.0729423	Mapkapk2	MAP kinase-activated protein kinase 2 [Source:MGI Symbol;Acc:MGI:109298]
ENSMUSG00000016529	1.84244	-1.19635	3.17612	-0.37667	0.706419	NA	Il10	interleukin 10 [Source:MGI Symbol;Acc:MGI:96537]
ENSMUSG00000016534	48.2821	1.45175	1.75658	0.82646	0.408543	0.999653	Lamp2	lysosomal-associated membrane protein 2 [Source:MGI Symbol;Acc:MGI:96748]
ENSMUSG00000016541	311.886	-0.0203854	0.163641	-0.124574	0.90086	0.999653	Atxn10	ataxin 10 [Source:MGI Symbol;Acc:MGI:1859293]
ENSMUSG00000016552	0.570736	-1.39467	6.12613	-0.227659	0.819912	NA	Foxred2	FAD-dependent oxidoreductase domain containing 2 [Source:MGI Symbol;Acc:MGI:106315]
ENSMUSG00000016554	39.0219	-0.274571	0.696827	-0.394031	0.693558	0.999653	Eif3d	eukaryotic translation initiation factor 3, subunit D [Source:MGI Symbol;Acc:MGI:1933181]
ENSMUSG00000016559	34.7562	0.171649	1.74436	0.0984024	0.921613	0.999653	H3f3b	H3.3 histone B [Source:MGI Symbol;Acc:MGI:1101768]
ENSMUSG00000016619	57.6511	-0.360833	0.408352	-0.883633	0.376894	0.999653	Nup50	nucleoporin 50 [Source:MGI Symbol;Acc:MGI:1351502]
ENSMUSG00000016624	1.4703	-1.508	3.01072	-0.500875	0.616459	NA	Phf21b	PHD finger protein 21B [Source:MGI Symbol;Acc:MGI:2443812]
ENSMUSG00000016626	84.5209	-1.20852	0.334466	-3.61329	0.000302337	0.00710262	Nlrp14	NLR family, pyrin domain containing 14 [Source:MGI Symbol;Acc:MGI:1924108]
ENSMUSG00000016637	8.69182	1.07106	1.17242	0.913541	0.360958	NA	Ift27	intraflagellar transport 27 [Source:MGI Symbol;Acc:MGI:1914292]
ENSMUSG00000016664	15.6584	-0.702926	1.98564	-0.354005	0.723335	0.999653	Pacsin2	protein kinase C and casein kinase substrate in neurons 2 [Source:MGI Symbol;Acc:MGI:1345153]
ENSMUSG00000016756	0	NA	NA	NA	NA	NA	Cmah	cytidine monophospho-N-acetylneuraminic acid hydroxylase [Source:MGI Symbol;Acc:MGI:103227]
ENSMUSG00000016757	8.90184	-0.787711	2.35701	-0.334199	0.738229	NA	Ttll12	tubulin tyrosine ligase-like family, member 12 [Source:MGI Symbol;Acc:MGI:3039573]
ENSMUSG00000016758	2.28587	1.34016	2.91397	0.45991	0.645581	NA	Bik	BCL2-interacting killer [Source:MGI Symbol;Acc:MGI:1206591]
ENSMUSG00000016763	0.125295	0.625602	6.20439	0.100832	0.919684	NA	Scube1	signal peptide, CUB domain, EGF-like 1 [Source:MGI Symbol;Acc:MGI:1890616]
ENSMUSG00000016831	61.9099	0.271142	0.450474	0.601902	0.547239	0.999653	Tox4	TOX high mobility group box family member 4 [Source:MGI Symbol;Acc:MGI:1915389]
ENSMUSG00000016833	3.93901	-0.641656	2.29003	-0.280195	0.779328	NA	Mrps18c	mitochondrial ribosomal protein S18C [Source:MGI Symbol;Acc:MGI:1915985]
ENSMUSG00000016918	8.08638	0.826985	1.95076	0.42393	0.671617	NA	Sulf1	sulfatase 1 [Source:MGI Symbol;Acc:MGI:2138563]
ENSMUSG00000016921	15.9026	-0.188432	1.84437	-0.102166	0.918625	0.999653	Srsf6	serine and arginine-rich splicing factor 6 [Source:MGI Symbol;Acc:MGI:1915246]
ENSMUSG00000016933	9.39506	-0.243087	1.94566	-0.124938	0.900572	NA	Plcg1	phospholipase C, gamma 1 [Source:MGI Symbol;Acc:MGI:97615]
ENSMUSG00000016940	1.15947	2.73258	4.76829	0.573072	0.566596	NA	Kctd2	potassium channel tetramerisation domain containing 2 [Source:MGI Symbol;Acc:MGI:1917632]
ENSMUSG00000016942	0.271219	0.156581	6.16855	0.0253837	0.979749	NA	Tmprss6	transmembrane serine protease 6 [Source:MGI Symbol;Acc:MGI:1919003]
ENSMUSG00000016946	9.60922	1.60114	1.42201	1.12597	0.26018	NA	Kctd5	potassium channel tetramerisation domain containing 5 [Source:MGI Symbol;Acc:MGI:1916509]
ENSMUSG00000016982	171.329	0.223199	0.335773	0.664732	0.506222	0.999653	Pom121l2	POM121 transmembrane nucleoporin like 2 [Source:MGI Symbol;Acc:MGI:2684870]
ENSMUSG00000016984	6.48078	1.54802	1.5211	1.0177	0.308821	NA	Etaa1	Ewing tumor-associated antigen 1 [Source:MGI Symbol;Acc:MGI:1915395]
ENSMUSG00000016995	0.110666	0.92261	6.18725	0.149115	0.881463	NA	Matn4	matrilin 4 [Source:MGI Symbol;Acc:MGI:1328314]
ENSMUSG00000016998	0.777766	3.63071	5.46926	0.663839	0.506793	NA	Svs4	seminal vesicle secretory protein 4 [Source:MGI Symbol;Acc:MGI:98450]
ENSMUSG00000017000	1.07547	-1.32701	3.58685	-0.369965	0.711408	NA	Svs6	seminal vesicle secretory protein 6 [Source:MGI Symbol;Acc:MGI:106178]
ENSMUSG00000017002	0	NA	NA	NA	NA	NA	Slpi	secretory leukocyte peptidase inhibitor [Source:MGI Symbol;Acc:MGI:109297]
ENSMUSG00000017003	0	NA	NA	NA	NA	NA	Svs3a	seminal vesicle secretory protein 3A [Source:MGI Symbol;Acc:MGI:1927635]
ENSMUSG00000017004	1.18976	2.06085	3.88662	0.530243	0.595944	NA	Svs5	seminal vesicle secretory protein 5 [Source:MGI Symbol;Acc:MGI:98453]
ENSMUSG00000017007	0.352844	1.14427	6.17691	0.18525	0.853033	NA	Rbpjl	recombination signal binding protein for immunoglobulin kappa J region-like [Source:MGI Symbol;Acc:MGI:1196616]
ENSMUSG00000017009	23.2034	0.628323	0.782835	0.802626	0.422191	0.999653	Sdc4	syndecan 4 [Source:MGI Symbol;Acc:MGI:1349164]
ENSMUSG00000017049	466.816	-1.68047	1.57765	-1.06517	0.286798	0.973347	Ccdc70	coiled-coil domain containing 70 [Source:MGI Symbol;Acc:MGI:1915179]
ENSMUSG00000017057	1.07158	3.19187	6.03023	0.529311	0.59659	NA	Il13ra1	interleukin 13 receptor, alpha 1 [Source:MGI Symbol;Acc:MGI:105052]
ENSMUSG00000017064	0.537334	0.788847	6.19722	0.12729	0.898711	NA	Prl5a1	prolactin family 5, subfamily a, member 1 [Source:MGI Symbol;Acc:MGI:106332]
ENSMUSG00000017119	698.669	-0.916935	1.67151	-0.548567	0.583303	0.999653	Nbr1	NBR1, autophagy cargo receptor [Source:MGI Symbol;Acc:MGI:108498]
ENSMUSG00000017132	90.7938	0.852496	1.71013	0.498497	0.618134	0.999653	Cyth1	cytohesin 1 [Source:MGI Symbol;Acc:MGI:1334257]
ENSMUSG00000017144	1.2676	3.22283	3.77998	0.852606	0.393878	NA	Rnd3	Rho family GTPase 3 [Source:MGI Symbol;Acc:MGI:1921444]
ENSMUSG00000017146	12.0596	1.18494	1.34253	0.882622	0.37744	0.999653	Brca1	breast cancer 1, early onset [Source:MGI Symbol;Acc:MGI:104537]
ENSMUSG00000017165	0.184386	0.0711467	6.21527	0.0114471	0.990867	NA	Gast	gastrin [Source:MGI Symbol;Acc:MGI:104768]
ENSMUSG00000017167	2.60451	-1.42336	3.30917	-0.430127	0.667104	NA	Cntnap1	contactin associated protein-like 1 [Source:MGI Symbol;Acc:MGI:1858201]
ENSMUSG00000017176	17.514	-1.14199	1.82203	-0.626768	0.530811	0.999653	Nt5c3b	5'-nucleotidase, cytosolic IIIB [Source:MGI Symbol;Acc:MGI:1915356]
ENSMUSG00000017188	10.206	-0.0599847	1.15408	-0.0519762	0.958548	NA	Coa3	cytochrome C oxidase assembly factor 3 [Source:MGI Symbol;Acc:MGI:1098757]
ENSMUSG00000017195	20.2995	0.657418	1.78323	0.368667	0.712376	0.999653	Zpbp2	zona pellucida binding protein 2 [Source:MGI Symbol;Acc:MGI:1916626]
ENSMUSG00000017204	37.5417	0.570045	0.484687	1.17611	0.239552	0.891776	Gsdma	gasdermin A [Source:MGI Symbol;Acc:MGI:1889509]
ENSMUSG00000017210	50.6455	-0.152119	1.74804	-0.0870227	0.930653	0.999653	Med24	mediator complex subunit 24 [Source:MGI Symbol;Acc:MGI:1344385]
ENSMUSG00000017211	0	NA	NA	NA	NA	NA	Gsdma2	gasdermin A2 [Source:MGI Symbol;Acc:MGI:1921490]
ENSMUSG00000017221	39.5913	0.265423	0.683212	0.388493	0.697651	0.999653	Psmd3	proteasome (prosome, macropain) 26S subunit, non-ATPase, 3 [Source:MGI Symbol;Acc:MGI:98858]
ENSMUSG00000017264	57.8139	-0.480495	1.7112	-0.280795	0.778868	0.999653	Exosc10	exosome component 10 [Source:MGI Symbol;Acc:MGI:1355322]
ENSMUSG00000017286	8.46384	1.51048	2.08948	0.7229	0.469741	NA	Glod4	glyoxalase domain containing 4 [Source:MGI Symbol;Acc:MGI:1914451]
ENSMUSG00000017288	8.18375	-0.209008	2.09686	-0.0996769	0.920601	NA	Vps53	VPS53 GARP complex subunit [Source:MGI Symbol;Acc:MGI:1915549]
ENSMUSG00000017291	25.4318	-0.759067	1.75019	-0.433706	0.664502	0.999653	Taok1	TAO kinase 1 [Source:MGI Symbol;Acc:MGI:1914490]
ENSMUSG00000017299	16.7542	-0.0652416	0.742338	-0.0878867	0.929967	0.999653	Dnttip1	deoxynucleotidyltransferase, terminal, interacting protein 1 [Source:MGI Symbol;Acc:MGI:1923483]
ENSMUSG00000017300	0.75109	-4.55381	6.1491	-0.740566	0.458957	NA	Tnnc2	troponin C2, fast [Source:MGI Symbol;Acc:MGI:98780]
ENSMUSG00000017307	5.00269	0.757797	2.56036	0.295973	0.767251	NA	Acot8	acyl-CoA thioesterase 8 [Source:MGI Symbol;Acc:MGI:2158201]
ENSMUSG00000017309	0.636827	0.732235	6.09649	0.120108	0.904398	NA	Cd300lg	CD300 molecule like family member G [Source:MGI Symbol;Acc:MGI:1289168]
ENSMUSG00000017310	0.134334	-0.345655	6.23278	-0.0554576	0.955774	NA	Spint4	serine protease inhibitor, Kunitz type 4 [Source:MGI Symbol;Acc:MGI:1925489]
ENSMUSG00000017311	0.239626	-3.08149	6.20914	-0.496283	0.619695	NA	Pyy	peptide YY [Source:MGI Symbol;Acc:MGI:99924]
ENSMUSG00000017314	0.137977	-0.712577	6.20982	-0.11475	0.908643	NA	Mpp2	membrane protein, palmitoylated 2 (MAGUK p55 subfamily member 2) [Source:MGI Symbol;Acc:MGI:1858257]
ENSMUSG00000017316	0	NA	NA	NA	NA	NA	Ppy	pancreatic polypeptide [Source:MGI Symbol;Acc:MGI:97753]
ENSMUSG00000017344	0.522072	7.29996	6.1327	1.19033	0.233915	NA	Vtn	vitronectin [Source:MGI Symbol;Acc:MGI:98940]
ENSMUSG00000017376	5.4035	2.25143	1.65342	1.36168	0.173299	NA	Nlk	nemo like kinase [Source:MGI Symbol;Acc:MGI:1201387]
ENSMUSG00000017386	0.667244	3.45325	6.11114	0.565074	0.572023	NA	Traf4	TNF receptor associated factor 4 [Source:MGI Symbol;Acc:MGI:1202880]
ENSMUSG00000017390	1.77909	0.637287	3.51068	0.181528	0.855953	NA	Aldoc	aldolase C, fructose-bisphosphate [Source:MGI Symbol;Acc:MGI:101863]
ENSMUSG00000017400	4.41083	-0.324193	1.54125	-0.210345	0.833399	NA	Stac2	SH3 and cysteine rich domain 2 [Source:MGI Symbol;Acc:MGI:2144518]
ENSMUSG00000017404	1.03163	0.678352	6.09599	0.111278	0.911396	NA	Rpl19	ribosomal protein L19 [Source:MGI Symbol;Acc:MGI:98020]
ENSMUSG00000017405	8.20786	-1.96043	1.77105	-1.10693	0.268326	NA	Nek8	NIMA (never in mitosis gene a)-related expressed kinase 8 [Source:MGI Symbol;Acc:MGI:1890646]
ENSMUSG00000017412	0	NA	NA	NA	NA	NA	Cacnb4	calcium channel, voltage-dependent, beta 4 subunit [Source:MGI Symbol;Acc:MGI:103301]
ENSMUSG00000017417	13.5522	-1.83593	0.977777	-1.87765	0.0604285	0.428166	Plxdc1	plexin domain containing 1 [Source:MGI Symbol;Acc:MGI:1919574]
ENSMUSG00000017418	7.56598	1.81942	1.16649	1.55975	0.11882	NA	Arl5b	ADP-ribosylation factor-like 5B [Source:MGI Symbol;Acc:MGI:1923119]
ENSMUSG00000017421	19.272	0.55726	1.80254	0.309152	0.757206	0.999653	Zfp207	zinc finger protein 207 [Source:MGI Symbol;Acc:MGI:1340045]
ENSMUSG00000017428	2.73742	-0.409529	3.15082	-0.129976	0.896586	NA	Psmd11	proteasome (prosome, macropain) 26S subunit, non-ATPase, 11 [Source:MGI Symbol;Acc:MGI:1916327]
ENSMUSG00000017446	0	NA	NA	NA	NA	NA	C1qtnf1	C1q and tumor necrosis factor related protein 1 [Source:MGI Symbol;Acc:MGI:1919254]
ENSMUSG00000017453	0.154353	0.894809	6.1904	0.144548	0.885068	NA	Pipox	pipecolic acid oxidase [Source:MGI Symbol;Acc:MGI:1197006]
ENSMUSG00000017466	52.3891	0.772152	0.42654	1.81027	0.0702538	0.470026	Timp2	tissue inhibitor of metalloproteinase 2 [Source:MGI Symbol;Acc:MGI:98753]
ENSMUSG00000017478	16.8373	-0.158843	1.78931	-0.0887733	0.929262	0.999653	Zc3h18	zinc finger CCCH-type containing 18 [Source:MGI Symbol;Acc:MGI:1923264]
ENSMUSG00000017485	21.2524	-1.12707	0.737985	-1.52722	0.126706	0.650892	Top2b	topoisomerase (DNA) II beta [Source:MGI Symbol;Acc:MGI:98791]
ENSMUSG00000017491	0.494745	-0.0346686	6.1196	-0.00566518	0.99548	NA	Rarb	retinoic acid receptor, beta [Source:MGI Symbol;Acc:MGI:97857]
ENSMUSG00000017493	3.34966	2.02085	2.21625	0.911833	0.361857	NA	Igfbp4	insulin-like growth factor binding protein 4 [Source:MGI Symbol;Acc:MGI:96439]
ENSMUSG00000017499	2.65171	0.178749	2.70208	0.0661525	0.947256	NA	Cdc6	cell division cycle 6 [Source:MGI Symbol;Acc:MGI:1345150]
ENSMUSG00000017548	5.93828	0.781205	2.06265	0.378739	0.704882	NA	Suz12	SUZ12 polycomb repressive complex 2 subunit [Source:MGI Symbol;Acc:MGI:1261758]
ENSMUSG00000017550	1.229	1.09893	6.0877	0.180516	0.856748	NA	Atad5	ATPase family, AAA domain containing 5 [Source:MGI Symbol;Acc:MGI:2442925]
ENSMUSG00000017561	3.31983	-0.204947	2.47442	-0.0828261	0.93399	NA	Crlf3	cytokine receptor-like factor 3 [Source:MGI Symbol;Acc:MGI:1860086]
ENSMUSG00000017588	0	NA	NA	NA	NA	NA	Krt27	keratin 27 [Source:MGI Symbol;Acc:MGI:1339999]
ENSMUSG00000017607	0.967147	4.67607	3.58363	1.30484	0.191947	NA	Tns4	tensin 4 [Source:MGI Symbol;Acc:MGI:2144377]
ENSMUSG00000017615	2.18025	1.43852	3.28671	0.437678	0.66162	NA	Tnfaip1	tumor necrosis factor, alpha-induced protein 1 (endothelial) [Source:MGI Symbol;Acc:MGI:104961]
ENSMUSG00000017631	2.01745	-4.05981	3.20059	-1.26846	0.204634	NA	Abr	active BCR-related gene [Source:MGI Symbol;Acc:MGI:107771]
ENSMUSG00000017639	33.5344	-0.170546	0.708723	-0.240639	0.809835	0.999653	Rab11fip4	RAB11 family interacting protein 4 (class II) [Source:MGI Symbol;Acc:MGI:2442920]
ENSMUSG00000017652	0.204026	-1.32683	6.21196	-0.213592	0.830865	NA	Cd40	CD40 antigen [Source:MGI Symbol;Acc:MGI:88336]
ENSMUSG00000017664	4.53895	-2.01046	2.29082	-0.877615	0.380153	NA	Slc35c2	solute carrier family 35, member C2 [Source:MGI Symbol;Acc:MGI:2385166]
ENSMUSG00000017667	4.71821	1.90641	1.94196	0.981692	0.326252	NA	Zfp334	zinc finger protein 334 [Source:MGI Symbol;Acc:MGI:2388656]
ENSMUSG00000017670	2.79106	-0.242101	3.17095	-0.0763498	0.939141	NA	Elmo2	engulfment and cell motility 2 [Source:MGI Symbol;Acc:MGI:2153045]
ENSMUSG00000017677	4.25464	-0.198596	2.14838	-0.0924399	0.926349	NA	Wsb1	WD repeat and SOCS box-containing 1 [Source:MGI Symbol;Acc:MGI:1926139]
ENSMUSG00000017679	0.564648	1.69593	5.98783	0.283229	0.777001	NA	Ttpal	tocopherol (alpha) transfer protein-like [Source:MGI Symbol;Acc:MGI:1923330]
ENSMUSG00000017686	17.1461	-0.545738	1.81465	-0.30074	0.763612	0.999653	Rhot1	ras homolog family member T1 [Source:MGI Symbol;Acc:MGI:1926078]
ENSMUSG00000017688	0	NA	NA	NA	NA	NA	Hnf4g	hepatocyte nuclear factor 4, gamma [Source:MGI Symbol;Acc:MGI:1353604]
ENSMUSG00000017692	0.977301	1.19993	5.55602	0.215969	0.829012	NA	Rhbdl3	rhomboid like 3 [Source:MGI Symbol;Acc:MGI:2179276]
ENSMUSG00000017697	13.4316	0.8494	1.55083	0.547705	0.583894	0.999653	Ada	adenosine deaminase [Source:MGI Symbol;Acc:MGI:87916]
ENSMUSG00000017707	260.748	0.0493379	0.181506	0.271825	0.785757	0.999653	Serinc3	serine incorporator 3 [Source:MGI Symbol;Acc:MGI:1349457]
ENSMUSG00000017713	0.265119	2.18284	6.14911	0.354985	0.7226	NA	Tha1	threonine aldolase 1 [Source:MGI Symbol;Acc:MGI:1919026]
ENSMUSG00000017715	24.9857	-0.898039	1.77994	-0.504532	0.613888	0.999653	Pgs1	phosphatidylglycerophosphate synthase 1 [Source:MGI Symbol;Acc:MGI:1921701]
ENSMUSG00000017716	11.7405	1.3661	1.71871	0.794844	0.426704	0.999653	Birc5	baculoviral IAP repeat-containing 5 [Source:MGI Symbol;Acc:MGI:1203517]
ENSMUSG00000017718	0.697032	-0.770992	6.07212	-0.126972	0.898962	NA	Afmid	arylformamidase [Source:MGI Symbol;Acc:MGI:2448704]
ENSMUSG00000017720	180.384	0.0254059	0.241508	0.105197	0.916219	0.999653	Trp53tg5	transformation related protein 53 target 5 [Source:MGI Symbol;Acc:MGI:1920853]
ENSMUSG00000017721	18.698	2.08273	1.43161	1.45482	0.145719	0.703309	Pigt	phosphatidylinositol glycan anchor biosynthesis, class T [Source:MGI Symbol;Acc:MGI:1926178]
ENSMUSG00000017723	0	NA	NA	NA	NA	NA	Wfdc2	WAP four-disulfide core domain 2 [Source:MGI Symbol;Acc:MGI:1914951]
ENSMUSG00000017724	0	NA	NA	NA	NA	NA	Etv4	ets variant 4 [Source:MGI Symbol;Acc:MGI:99423]
ENSMUSG00000017733	17.3093	0.122326	0.929735	0.13157	0.895324	0.999653	Eppin	epididymal peptidase inhibitor [Source:MGI Symbol;Acc:MGI:1922776]
ENSMUSG00000017734	0.535251	-4.36546	6.16035	-0.708638	0.478549	NA	Dbndd2	dysbindin domain containing 2 [Source:MGI Symbol;Acc:MGI:106562]
ENSMUSG00000017737	2.09823	0.697301	2.87554	0.242494	0.808398	NA	Mmp9	matrix metallopeptidase 9 [Source:MGI Symbol;Acc:MGI:97011]
ENSMUSG00000017740	5.82533	-0.658346	2.16246	-0.304444	0.76079	NA	Slc12a5	solute carrier family 12, member 5 [Source:MGI Symbol;Acc:MGI:1862037]
ENSMUSG00000017747	4.47697	-0.0176711	1.97163	-0.00896267	0.992849	NA	Ghdc	GH3 domain containing [Source:MGI Symbol;Acc:MGI:1931556]
ENSMUSG00000017754	6.57052	3.1207	2.43609	1.28103	0.200183	NA	Pltp	phospholipid transfer protein [Source:MGI Symbol;Acc:MGI:103151]
ENSMUSG00000017756	18.2083	-0.532325	1.78688	-0.297908	0.765774	0.999653	Slc12a7	solute carrier family 12, member 7 [Source:MGI Symbol;Acc:MGI:1342283]
ENSMUSG00000017760	17.56	2.47946	1.07935	2.29717	0.0216088	0.221517	Ctsa	cathepsin A [Source:MGI Symbol;Acc:MGI:97748]
ENSMUSG00000017764	68.7378	-0.952932	0.769491	-1.23839	0.21557	0.848472	Zswim1	zinc finger SWIM-type containing 1 [Source:MGI Symbol;Acc:MGI:1919221]
ENSMUSG00000017765	1.00885	-0.390355	5.1129	-0.0763471	0.939143	NA	Slc12a4	solute carrier family 12, member 4 [Source:MGI Symbol;Acc:MGI:1309465]
ENSMUSG00000017767	61.8615	-0.4433	0.51527	-0.860325	0.38961	0.999653	Spata25	spermatogenesis associated 25 [Source:MGI Symbol;Acc:MGI:1922892]
ENSMUSG00000017774	16.3472	0.00129969	1.8728	0.000693985	0.999446	0.999653	Myo1c	myosin IC [Source:MGI Symbol;Acc:MGI:106612]
ENSMUSG00000017776	9.62362	-0.872076	1.89183	-0.46097	0.64482	NA	Crk	v-crk avian sarcoma virus CT10 oncogene homolog [Source:MGI Symbol;Acc:MGI:88508]
ENSMUSG00000017778	0	NA	NA	NA	NA	NA	Cox7c	cytochrome c oxidase subunit 7C [Source:MGI Symbol;Acc:MGI:103226]
ENSMUSG00000017781	13.7009	-0.458285	1.85106	-0.24758	0.804459	0.999653	Pitpna	phosphatidylinositol transfer protein, alpha [Source:MGI Symbol;Acc:MGI:99887]
ENSMUSG00000017801	1.20204	0.868538	3.93385	0.220786	0.825259	NA	Mlx	MAX-like protein X [Source:MGI Symbol;Acc:MGI:108398]
ENSMUSG00000017802	50.0114	-0.0814409	1.70897	-0.0476548	0.961991	0.999653	Retreg3	reticulophagy regulator family member 3 [Source:MGI Symbol;Acc:MGI:1915248]
ENSMUSG00000017817	1.2154	-1.78161	5.07585	-0.350996	0.725591	NA	Jph2	junctophilin 2 [Source:MGI Symbol;Acc:MGI:1891496]
ENSMUSG00000017830	29.3597	0.340103	0.689173	0.493494	0.621663	0.999653	Dhx58	DExH-box helicase 58 [Source:MGI Symbol;Acc:MGI:1931560]
ENSMUSG00000017831	77.7593	-0.281365	2.2027	-0.127736	0.898358	0.999653	Rab5a	RAB5A, member RAS oncogene family [Source:MGI Symbol;Acc:MGI:105926]
ENSMUSG00000017832	1024.29	-0.805155	1.67169	-0.481641	0.630061	0.999653	Hspb9	heat shock protein, alpha-crystallin-related, B9 [Source:MGI Symbol;Acc:MGI:1922732]
ENSMUSG00000017837	53.3721	0.29394	0.512198	0.573879	0.56605	0.999653	Nkiras2	NFKB inhibitor interacting Ras-like protein 2 [Source:MGI Symbol;Acc:MGI:1919216]
ENSMUSG00000017843	119.263	-0.788185	1.69299	-0.465557	0.641533	0.999653	Ppp2r5c	protein phosphatase 2, regulatory subunit B', gamma [Source:MGI Symbol;Acc:MGI:1349475]
ENSMUSG00000017858	28.038	0.337039	0.656374	0.513487	0.607611	0.999653	Ift52	intraflagellar transport 52 [Source:MGI Symbol;Acc:MGI:2387217]
ENSMUSG00000017861	4.48841	-1.79814	1.68193	-1.06909	0.285028	NA	Mybl2	myeloblastosis oncogene-like 2 [Source:MGI Symbol;Acc:MGI:101785]
ENSMUSG00000017868	0.225452	-0.867198	6.2041	-0.139778	0.888835	NA	Sgk2	serum/glucocorticoid regulated kinase 2 [Source:MGI Symbol;Acc:MGI:1351318]
ENSMUSG00000017897	0.602632	-3.97779	6.17624	-0.644047	0.519545	NA	Eya2	EYA transcriptional coactivator and phosphatase 2 [Source:MGI Symbol;Acc:MGI:109341]
ENSMUSG00000017922	0.202472	1.85955	6.15588	0.302078	0.762593	NA	Prl3c1	prolactin family 3, subfamily c, member 1 [Source:MGI Symbol;Acc:MGI:1351649]
ENSMUSG00000017929	9.8932	1.06712	1.13317	0.941714	0.346339	NA	B4galt5	UDP-Gal:betaGlcNAc beta 1,4-galactosyltransferase, polypeptide 5 [Source:MGI Symbol;Acc:MGI:1927169]
ENSMUSG00000017943	0.305862	-3.70924	6.18255	-0.599953	0.548537	NA	Gdap1l1	ganglioside-induced differentiation-associated protein 1-like 1 [Source:MGI Symbol;Acc:MGI:2385163]
ENSMUSG00000017950	0	NA	NA	NA	NA	NA	Hnf4a	hepatic nuclear factor 4, alpha [Source:MGI Symbol;Acc:MGI:109128]
ENSMUSG00000017969	2.2431	4.49176	3.00468	1.49492	0.134935	NA	Ptgis	prostaglandin I2 (prostacyclin) synthase [Source:MGI Symbol;Acc:MGI:1097156]
ENSMUSG00000017978	1.37079	-1.43639	4.98757	-0.287995	0.773351	NA	Cadps2	Ca2+-dependent activator protein for secretion 2 [Source:MGI Symbol;Acc:MGI:2443963]
ENSMUSG00000017999	19.3696	0.184374	0.891822	0.206738	0.836214	0.999653	Ddx27	DEAD box helicase 27 [Source:MGI Symbol;Acc:MGI:2385884]
ENSMUSG00000018001	23.9208	-0.401623	0.966662	-0.415473	0.677795	0.999653	Cyth3	cytohesin 3 [Source:MGI Symbol;Acc:MGI:1335107]
ENSMUSG00000018008	1.01738	0.654057	4.34044	0.150689	0.880221	NA	Cyth4	cytohesin 4 [Source:MGI Symbol;Acc:MGI:2441702]
ENSMUSG00000018012	0	NA	NA	NA	NA	NA	Rac3	Rac family small GTPase 3 [Source:MGI Symbol;Acc:MGI:2180784]
ENSMUSG00000018040	88.4448	1.05627	0.392062	2.69413	0.00705722	0.0988011	Rrp7a	ribosomal RNA processing 7 homolog A [Source:MGI Symbol;Acc:MGI:1922028]
ENSMUSG00000018042	10.6968	0.0505606	1.36457	0.0370524	0.970443	NA	Cyb5r3	cytochrome b5 reductase 3 [Source:MGI Symbol;Acc:MGI:94893]
ENSMUSG00000018068	8.16092	-0.652307	1.25334	-0.520456	0.602745	NA	Ints2	integrator complex subunit 2 [Source:MGI Symbol;Acc:MGI:1917672]
ENSMUSG00000018076	28.6367	0.273073	1.63148	0.167378	0.867073	0.999653	Med13l	mediator complex subunit 13-like [Source:MGI Symbol;Acc:MGI:2670178]
ENSMUSG00000018102	6.93157	-4.58277	1.75732	-2.60782	0.00911204	NA	H2bc4	H2B clustered histone 4 [Source:MGI Symbol;Acc:MGI:1915274]
ENSMUSG00000018126	0.166553	-2.79504	6.2191	-0.449429	0.653123	NA	Baiap2l2	BAI1-associated protein 2-like 2 [Source:MGI Symbol;Acc:MGI:2652819]
ENSMUSG00000018143	6.03312	0.959257	1.11758	0.858336	0.390707	NA	Mafk	v-maf musculoaponeurotic fibrosarcoma oncogene family, protein K (avian) [Source:MGI Symbol;Acc:MGI:99951]
ENSMUSG00000018160	47.6224	2.04827	1.53627	1.33327	0.182443	0.784887	Med1	mediator complex subunit 1 [Source:MGI Symbol;Acc:MGI:1100846]
ENSMUSG00000018166	6.13556	-3.24726	1.95909	-1.65754	0.0974108	NA	Erbb3	erb-b2 receptor tyrosine kinase 3 [Source:MGI Symbol;Acc:MGI:95411]
ENSMUSG00000018167	1.15253	2.55729	3.80372	0.672312	0.501385	NA	Stard3	StAR related lipid transfer domain containing 3 [Source:MGI Symbol;Acc:MGI:1929618]
ENSMUSG00000018168	0.273589	-3.03605	6.21283	-0.488674	0.625073	NA	Ikzf3	IKAROS family zinc finger 3 [Source:MGI Symbol;Acc:MGI:1342542]
ENSMUSG00000018169	0.287708	-1.31779	6.22153	-0.211812	0.832254	NA	Mfng	MFNG O-fucosylpeptide 3-beta-N-acetylglucosaminyltransferase [Source:MGI Symbol;Acc:MGI:1095404]
ENSMUSG00000018171	14.1288	0.950183	1.18735	0.800257	0.423562	0.999653	Vmp1	vacuole membrane protein 1 [Source:MGI Symbol;Acc:MGI:1923159]
ENSMUSG00000018189	20.4128	-0.203942	1.77965	-0.114597	0.908765	0.999653	Uchl5	ubiquitin carboxyl-terminal esterase L5 [Source:MGI Symbol;Acc:MGI:1914848]
ENSMUSG00000018196	38.3022	-0.860492	1.74229	-0.493886	0.621387	0.999653	Glrx2	glutaredoxin 2 [Source:MGI Symbol;Acc:MGI:1916617]
ENSMUSG00000018199	1.25637	0.53893	3.59391	0.149956	0.880799	NA	Ro60	Ro60, Y RNA binding protein [Source:MGI Symbol;Acc:MGI:106652]
ENSMUSG00000018209	12.2415	-3.03544	1.66815	-1.81964	0.0688138	0.463391	Stk4	serine/threonine kinase 4 [Source:MGI Symbol;Acc:MGI:1929004]
ENSMUSG00000018211	0	NA	NA	NA	NA	NA	Wfdc15b	WAP four-disulfide core domain 15B [Source:MGI Symbol;Acc:MGI:2445041]
ENSMUSG00000018217	4.52769	3.12622	2.59058	1.20676	0.227524	NA	Pmp22	peripheral myelin protein 22 [Source:MGI Symbol;Acc:MGI:97631]
ENSMUSG00000018238	10.9017	-1.67751	1.43516	-1.16887	0.242458	NA	Gdf9	growth differentiation factor 9 [Source:MGI Symbol;Acc:MGI:95692]
ENSMUSG00000018239	3.27636	1.18537	2.23736	0.529808	0.596245	NA	Zcchc10	zinc finger, CCHC domain containing 10 [Source:MGI Symbol;Acc:MGI:1196228]
ENSMUSG00000018259	0	NA	NA	NA	NA	NA	Prl8a2	prolactin family 8, subfamily a, member 2 [Source:MGI Symbol;Acc:MGI:894281]
ENSMUSG00000018263	6.08117	0.357262	1.64826	0.216752	0.828402	NA	Tbx5	T-box 5 [Source:MGI Symbol;Acc:MGI:102541]
ENSMUSG00000018286	48.0348	-0.422761	1.72343	-0.245303	0.806222	0.999653	Psmb6	proteasome (prosome, macropain) subunit, beta type 6 [Source:MGI Symbol;Acc:MGI:104880]
ENSMUSG00000018287	24.8473	1.285	1.70129	0.755309	0.450064	0.999653	Spag7	sperm associated antigen 7 [Source:MGI Symbol;Acc:MGI:107380]
ENSMUSG00000018293	21.1045	-0.45992	1.77808	-0.258661	0.795896	0.999653	Pfn1	profilin 1 [Source:MGI Symbol;Acc:MGI:97549]
ENSMUSG00000018322	33.3113	1.22761	1.78292	0.688542	0.491112	0.999653	Tomm34	translocase of outer mitochondrial membrane 34 [Source:MGI Symbol;Acc:MGI:1914395]
ENSMUSG00000018326	25.6461	-0.311273	0.572442	-0.543763	0.586605	0.999653	Ywhab	tyrosine 3-monooxygenase/tryptophan 5-monooxygenase activation protein, beta polypeptide [Source:MGI Symbol;Acc:MGI:1891917]
ENSMUSG00000018334	3.84367	-0.517389	2.20255	-0.234905	0.814282	NA	Ksr1	kinase suppressor of ras 1 [Source:MGI Symbol;Acc:MGI:105051]
ENSMUSG00000018339	0.814228	-4.70854	4.31543	-1.09109	0.275231	NA	Gpx3	glutathione peroxidase 3 [Source:MGI Symbol;Acc:MGI:105102]
ENSMUSG00000018340	1.87769	0.278585	2.67481	0.104151	0.917049	NA	Anxa6	annexin A6 [Source:MGI Symbol;Acc:MGI:88255]
ENSMUSG00000018341	0.111833	-2.24828	6.23087	-0.36083	0.718226	NA	Il12rb2	interleukin 12 receptor, beta 2 [Source:MGI Symbol;Acc:MGI:1270861]
ENSMUSG00000018347	6.5417	3.59464	1.72934	2.07863	0.0376518	NA	Zkscan6	zinc finger with KRAB and SCAN domains 6 [Source:MGI Symbol;Acc:MGI:1289293]
ENSMUSG00000018362	1.38425	-0.401498	3.9746	-0.101016	0.919538	NA	Kpna2	karyopherin subunit alpha 2 [Source:MGI Symbol;Acc:MGI:103561]
ENSMUSG00000018363	10.8631	-0.864901	1.8581	-0.465476	0.641591	NA	Smurf2	SMAD specific E3 ubiquitin protein ligase 2 [Source:MGI Symbol;Acc:MGI:1913563]
ENSMUSG00000018372	20.2573	-0.816906	1.76975	-0.461594	0.644372	0.999653	Cep95	centrosomal protein 95 [Source:MGI Symbol;Acc:MGI:2443502]
ENSMUSG00000018377	3.36417	-1.96978	2.36407	-0.833215	0.404723	NA	Vezf1	vascular endothelial zinc finger 1 [Source:MGI Symbol;Acc:MGI:1313291]
ENSMUSG00000018378	0.0798753	-2.26912	6.23278	-0.364062	0.715812	NA	Cuedc1	CUE domain containing 1 [Source:MGI Symbol;Acc:MGI:2144281]
ENSMUSG00000018379	35.547	0.100874	1.7611	0.0572788	0.954323	0.999653	Srsf1	serine and arginine-rich splicing factor 1 [Source:MGI Symbol;Acc:MGI:98283]
ENSMUSG00000018381	5486.46	-1.50203	1.67089	-0.898937	0.368686	0.999653	Abi3	ABI family member 3 [Source:MGI Symbol;Acc:MGI:1913860]
ENSMUSG00000018387	0	NA	NA	NA	NA	NA	Shroom1	shroom family member 1 [Source:MGI Symbol;Acc:MGI:1919024]
ENSMUSG00000018395	43.809	-0.24803	1.75853	-0.141044	0.887835	0.999653	Kif3a	kinesin family member 3A [Source:MGI Symbol;Acc:MGI:107689]
ENSMUSG00000018398	0.333106	-3.44077	6.19476	-0.555432	0.578599	NA	Septin8	septin 8 [Source:MGI Symbol;Acc:MGI:894310]
ENSMUSG00000018401	95.7343	-0.826018	1.69107	-0.488458	0.625226	0.999653	Mtmr4	myotubularin related protein 4 [Source:MGI Symbol;Acc:MGI:2180699]
ENSMUSG00000018405	1.14897	1.07831	3.18905	0.33813	0.735265	NA	Mrm1	mitochondrial rRNA methyltransferase 1 [Source:MGI Symbol;Acc:MGI:2443470]
ENSMUSG00000018411	0.0313238	-0.372134	6.23033	-0.0597294	0.952371	NA	Mapt	microtubule-associated protein tau [Source:MGI Symbol;Acc:MGI:97180]
ENSMUSG00000018412	28.1114	-0.836153	1.0585	-0.789945	0.42956	0.999653	Kansl1	KAT8 regulatory NSL complex subunit 1 [Source:MGI Symbol;Acc:MGI:1923969]
ENSMUSG00000018415	42.006	-1.41277	0.500874	-2.82061	0.0047933	0.0748818	Gid4	GID complex subunit 4, VID24 homolog [Source:MGI Symbol;Acc:MGI:1914021]
ENSMUSG00000018417	2.71778	2.4632	3.30732	0.744771	0.45641	NA	Myo1b	myosin IB [Source:MGI Symbol;Acc:MGI:107752]
ENSMUSG00000018425	101.88	1.08633	0.347005	3.1306	0.00174447	0.0331878	Dhx40	DEAH-box helicase 40 [Source:MGI Symbol;Acc:MGI:1914737]
ENSMUSG00000018427	2.04173	1.66217	2.30403	0.721418	0.470653	NA	Ypel2	yippee like 2 [Source:MGI Symbol;Acc:MGI:1925114]
ENSMUSG00000018428	1586.6	-2.37543	1.44837	-1.64007	0.100991	0.576215	Akap1	A kinase anchor protein 1 [Source:MGI Symbol;Acc:MGI:104729]
ENSMUSG00000018433	3.73345	0.403077	2.29755	0.175438	0.860736	NA	Nol11	nucleolar protein 11 [Source:MGI Symbol;Acc:MGI:1916229]
ENSMUSG00000018442	12.741	0.324538	2.02263	0.160454	0.872524	0.999653	Derl2	Der1-like domain family, member 2 [Source:MGI Symbol;Acc:MGI:2151483]
ENSMUSG00000018446	4.79141	-1.34924	2.05705	-0.655909	0.511882	NA	C1qbp	complement component 1, q subcomponent binding protein [Source:MGI Symbol;Acc:MGI:1194505]
ENSMUSG00000018449	2.1582	-0.331832	2.69295	-0.123222	0.901931	NA	Rpain	RPA interacting protein [Source:MGI Symbol;Acc:MGI:1916973]
ENSMUSG00000018451	0	NA	NA	NA	NA	NA	6330403K07Rik	RIKEN cDNA 6330403K07 gene [Source:MGI Symbol;Acc:MGI:1918001]
ENSMUSG00000018459	0.108116	0.410948	6.21079	0.0661668	0.947245	NA	Slc13a3	solute carrier family 13 (sodium-dependent dicarboxylate transporter), member 3 [Source:MGI Symbol;Acc:MGI:2149635]
ENSMUSG00000018470	2.2483	-1.60684	2.57166	-0.624824	0.532086	NA	Kcnab3	potassium voltage-gated channel, shaker-related subfamily, beta member 3 [Source:MGI Symbol;Acc:MGI:1336208]
ENSMUSG00000018474	30.4673	-0.135321	1.76289	-0.0767605	0.938814	0.999653	Chd3	chromodomain helicase DNA binding protein 3 [Source:MGI Symbol;Acc:MGI:1344395]
ENSMUSG00000018476	105.14	0.493836	0.463183	1.06618	0.286343	0.973095	Kdm6b	KDM1 lysine (K)-specific demethylase 6B [Source:MGI Symbol;Acc:MGI:2448492]
ENSMUSG00000018479	20.2743	-1.29959	1.74128	-0.746343	0.45546	0.999653	Chct1	CHD1 helical C-terminal domain containing 1 [Source:MGI Symbol;Acc:MGI:1920884]
ENSMUSG00000018481	153.833	0.188106	0.350983	0.535941	0.591999	0.999653	Appbp2	amyloid beta precursor protein binding protein 2 [Source:MGI Symbol;Acc:MGI:1914134]
ENSMUSG00000018486	0.352844	1.14427	6.17691	0.18525	0.853033	NA	Wnt9b	wingless-type MMTV integration site family, member 9B [Source:MGI Symbol;Acc:MGI:1197020]
ENSMUSG00000018500	3.28552	3.49601	2.81802	1.24059	0.214757	NA	Adora2b	adenosine A2b receptor [Source:MGI Symbol;Acc:MGI:99403]
ENSMUSG00000018501	39.2623	-0.751403	1.71876	-0.437177	0.661983	0.999653	Ncor1	nuclear receptor co-repressor 1 [Source:MGI Symbol;Acc:MGI:1349717]
ENSMUSG00000018507	0.231633	2.33565	6.16884	0.378621	0.704969	NA	Trpv2	transient receptor potential cation channel, subfamily V, member 2 [Source:MGI Symbol;Acc:MGI:1341836]
ENSMUSG00000018509	79.2769	3.02879	1.44548	2.09536	0.0361391	0.313038	Cenpv	centromere protein V [Source:MGI Symbol;Acc:MGI:1920389]
ENSMUSG00000018537	3.48979	3.18759	2.97522	1.07138	0.284	NA	Pcgf2	polycomb group ring finger 2 [Source:MGI Symbol;Acc:MGI:99161]
ENSMUSG00000018541	3.17866	0.124315	2.10171	0.0591492	0.952833	NA	Cwc25	CWC25 spliceosome-associated protein [Source:MGI Symbol;Acc:MGI:1914730]
ENSMUSG00000018543	36.0395	-0.0587364	0.629961	-0.0932381	0.925714	0.999653	Spmap1	sperm microtubule associated protein 1 [Source:MGI Symbol;Acc:MGI:1919465]
ENSMUSG00000018547	3.42605	0.80533	2.02787	0.39713	0.691272	NA	Pip4k2b	phosphatidylinositol-5-phosphate 4-kinase, type II, beta [Source:MGI Symbol;Acc:MGI:1934234]
ENSMUSG00000018548	521.063	-0.314987	0.129461	-2.43306	0.0149717	0.173946	Trim37	tripartite motif-containing 37 [Source:MGI Symbol;Acc:MGI:2153072]
ENSMUSG00000018554	1190.61	-1.62157	0.173728	-9.33393	1.02e-20	1.41e-18	Ybx2	Y box protein 2 [Source:MGI Symbol;Acc:MGI:1096372]
ENSMUSG00000018559	32.7139	-2.16395	0.77398	-2.79587	0.00517598	0.0793976	Ctdnep1	CTD nuclear envelope phosphatase 1 [Source:MGI Symbol;Acc:MGI:1914431]
ENSMUSG00000018565	76.7267	-0.686712	0.384545	-1.78578	0.0741353	0.483986	Elp5	elongator acetyltransferase complex subunit 5 [Source:MGI Symbol;Acc:MGI:1859017]
ENSMUSG00000018566	0.187943	1.04484	6.18888	0.168825	0.865934	NA	Slc2a4	solute carrier family 2 (facilitated glucose transporter), member 4 [Source:MGI Symbol;Acc:MGI:95758]
ENSMUSG00000018567	246.851	0.553048	0.318895	1.73426	0.0828713	0.51655	Gabarap	gamma-aminobutyric acid receptor associated protein [Source:MGI Symbol;Acc:MGI:1861742]
ENSMUSG00000018569	0.225987	-2.99213	6.21007	-0.481819	0.629935	NA	Cldn7	claudin 7 [Source:MGI Symbol;Acc:MGI:1859285]
ENSMUSG00000018570	260.844	-0.921736	1.67729	-0.54954	0.582635	0.999653	2810408A11Rik	RIKEN cDNA 2810408A11 gene [Source:MGI Symbol;Acc:MGI:1917669]
ENSMUSG00000018572	10.1147	0.0242668	1.85859	0.0130565	0.989583	NA	Phf23	PHD finger protein 23 [Source:MGI Symbol;Acc:MGI:1925496]
ENSMUSG00000018574	9.65155	-0.558443	1.87755	-0.297431	0.766138	NA	Acadvl	acyl-Coenzyme A dehydrogenase, very long chain [Source:MGI Symbol;Acc:MGI:895149]
ENSMUSG00000018581	1.77055	-1.26726	2.29544	-0.552079	0.580894	NA	Dnah11	dynein, axonemal, heavy chain 11 [Source:MGI Symbol;Acc:MGI:1100864]
ENSMUSG00000018583	27.781	1.14942	0.723439	1.58882	0.112101	0.612014	G3bp1	G3BP stress granule assembly factor 1 [Source:MGI Symbol;Acc:MGI:1351465]
ENSMUSG00000018585	8.30514	1.61491	1.79697	0.898685	0.36882	NA	Atox1	antioxidant 1 copper chaperone [Source:MGI Symbol;Acc:MGI:1333855]
ENSMUSG00000018589	0	NA	NA	NA	NA	NA	Glra2	glycine receptor, alpha 2 subunit [Source:MGI Symbol;Acc:MGI:95748]
ENSMUSG00000018593	122.229	0.992341	1.69291	0.586174	0.557759	0.999653	Sparc	secreted acidic cysteine rich glycoprotein [Source:MGI Symbol;Acc:MGI:98373]
ENSMUSG00000018595	0.810819	-0.0833582	4.45943	-0.0186925	0.985086	NA	Glra4	glycine receptor, alpha 4 subunit [Source:MGI Symbol;Acc:MGI:95750]
ENSMUSG00000018599	3.95628	2.54785	1.93971	1.31352	0.189008	NA	Mief2	mitochondrial elongation factor 2 [Source:MGI Symbol;Acc:MGI:2144199]
ENSMUSG00000018604	0.161334	1.33167	6.17401	0.21569	0.829229	NA	Tbx3	T-box 3 [Source:MGI Symbol;Acc:MGI:98495]
ENSMUSG00000018620	0	NA	NA	NA	NA	NA	Mmp20	matrix metallopeptidase 20 (enamelysin) [Source:MGI Symbol;Acc:MGI:1353466]
ENSMUSG00000018623	0.223665	-2.72388	6.21664	-0.438159	0.661271	NA	Mmp7	matrix metallopeptidase 7 [Source:MGI Symbol;Acc:MGI:103189]
ENSMUSG00000018634	1.45328	-0.510783	4.784	-0.106769	0.914972	NA	Crhr1	corticotropin releasing hormone receptor 1 [Source:MGI Symbol;Acc:MGI:88498]
ENSMUSG00000018648	0.402128	0.275506	6.1688	0.0446611	0.964377	NA	Dusp14	dual specificity phosphatase 14 [Source:MGI Symbol;Acc:MGI:1927168]
ENSMUSG00000018651	2.92431	2.22667	2.00325	1.11153	0.26634	NA	Tada2a	transcriptional adaptor 2A [Source:MGI Symbol;Acc:MGI:2144471]
ENSMUSG00000018654	0	NA	NA	NA	NA	NA	Ikzf1	IKAROS family zinc finger 1 [Source:MGI Symbol;Acc:MGI:1342540]
ENSMUSG00000018656	0	NA	NA	NA	NA	NA	Tcaf3	TRPM8 channel-associated factor 3 [Source:MGI Symbol;Acc:MGI:3042585]
ENSMUSG00000018659	1.26276	0.910986	4.04506	0.225209	0.821816	NA	Pnpo	pyridoxine 5'-phosphate oxidase [Source:MGI Symbol;Acc:MGI:2144151]
ENSMUSG00000018661	575.141	-0.286858	0.223662	-1.28255	0.199649	0.818139	Cog1	component of oligomeric golgi complex 1 [Source:MGI Symbol;Acc:MGI:1333873]
ENSMUSG00000018666	9.4237	-0.550271	1.40486	-0.39169	0.695287	NA	Cbx1	chromobox 1 [Source:MGI Symbol;Acc:MGI:105369]
ENSMUSG00000018669	59.2061	-0.419599	1.71069	-0.245281	0.806239	0.999653	Cdk5rap3	CDK5 regulatory subunit associated protein 3 [Source:MGI Symbol;Acc:MGI:1933126]
ENSMUSG00000018672	0.372852	2.61356	6.14249	0.425488	0.670481	NA	Copz2	coatomer protein complex, subunit zeta 2 [Source:MGI Symbol;Acc:MGI:1929008]
ENSMUSG00000018677	432.56	-0.672806	1.6738	-0.401964	0.68771	0.999653	Slc25a39	solute carrier family 25, member 39 [Source:MGI Symbol;Acc:MGI:1196386]
ENSMUSG00000018678	4.25671	-1.24383	1.68919	-0.736348	0.461519	NA	Sp2	Sp2 transcription factor [Source:MGI Symbol;Acc:MGI:1926162]
ENSMUSG00000018697	49.3895	-0.119449	1.75608	-0.0680202	0.94577	0.999653	Aatf	apoptosis antagonizing transcription factor [Source:MGI Symbol;Acc:MGI:1929608]
ENSMUSG00000018698	6.82855	-0.207534	1.45361	-0.142771	0.886471	NA	Lhx1	LIM homeobox protein 1 [Source:MGI Symbol;Acc:MGI:99783]
ENSMUSG00000018707	1848.93	0.274236	0.0826178	3.31934	0.00090231	0.0185514	Dync1h1	dynein cytoplasmic 1 heavy chain 1 [Source:MGI Symbol;Acc:MGI:103147]
ENSMUSG00000018727	16.0818	-0.808026	1.01811	-0.793654	0.427397	0.999653	Cpsf4l	cleavage and polyadenylation specific factor 4-like [Source:MGI Symbol;Acc:MGI:1277182]
ENSMUSG00000018733	5.08826	-0.88015	2.21095	-0.398087	0.690566	NA	Pex12	peroxisomal biogenesis factor 12 [Source:MGI Symbol;Acc:MGI:2144177]
ENSMUSG00000018736	39.678	0.431958	0.815127	0.529927	0.596162	0.999653	Ndel1	nudE neurodevelopment protein 1 like 1 [Source:MGI Symbol;Acc:MGI:1932915]
ENSMUSG00000018740	3796.56	-6.969	1.24896	-5.57983	2.41e-08	1.29e-06	Slc25a35	solute carrier family 25, member 35 [Source:MGI Symbol;Acc:MGI:1919248]
ENSMUSG00000018750	1.19457	3.62052	4.92123	0.735694	0.461917	NA	Zbtb4	zinc finger and BTB domain containing 4 [Source:MGI Symbol;Acc:MGI:1922830]
ENSMUSG00000018752	0	NA	NA	NA	NA	NA	Tnfsfm13	tumor necrosis factor (ligand) superfamily, membrane-bound member 13 [Source:MGI Symbol;Acc:MGI:3845075]
ENSMUSG00000018761	4.19119	0.646431	2.76658	0.233657	0.815251	NA	Mpdu1	mannose-P-dolichol utilization defect 1 [Source:MGI Symbol;Acc:MGI:1346040]
ENSMUSG00000018765	38.0708	1.27904	0.72248	1.77034	0.0766701	0.493193	Fxr2	FMR1 autosomal homolog 2 [Source:MGI Symbol;Acc:MGI:1346074]
ENSMUSG00000018770	13.4102	-0.145026	1.84969	-0.0784052	0.937506	0.999653	Atp5mc3	ATP synthase membrane subunit c locus 3 [Source:MGI Symbol;Acc:MGI:2442035]
ENSMUSG00000018774	0.331315	2.0096	6.18087	0.325133	0.74508	NA	Cd68	CD68 antigen [Source:MGI Symbol;Acc:MGI:88342]
ENSMUSG00000018776	33.8168	-1.13068	1.67325	-0.675743	0.499204	0.999653	Slc35g3	solute carrier family 35, member G3 [Source:MGI Symbol;Acc:MGI:1927128]
ENSMUSG00000018796	793.236	-0.863322	0.620708	-1.39087	0.164266	0.7491	Acsl1	acyl-CoA synthetase long-chain family member 1 [Source:MGI Symbol;Acc:MGI:102797]
ENSMUSG00000018800	43.6471	1.06012	0.693319	1.52905	0.126252	0.650892	Abca5	ATP-binding cassette, sub-family A member 5 [Source:MGI Symbol;Acc:MGI:2386607]
ENSMUSG00000018809	6.42214	-0.368376	1.40193	-0.262764	0.792732	NA	Smyd4	SET and MYND domain containing 4 [Source:MGI Symbol;Acc:MGI:2442796]
ENSMUSG00000018819	0.766929	-5.04226	6.14537	-0.820498	0.411932	NA	Lsp1	lymphocyte specific 1 [Source:MGI Symbol;Acc:MGI:96832]
ENSMUSG00000018820	3.69825	1.33759	3.3162	0.403352	0.686689	NA	Zfyve27	zinc finger, FYVE domain containing 27 [Source:MGI Symbol;Acc:MGI:1919602]
ENSMUSG00000018821	8.94869	1.28995	1.12533	1.14628	0.251679	NA	Avpi1	arginine vasopressin-induced 1 [Source:MGI Symbol;Acc:MGI:1916784]
ENSMUSG00000018822	4.36493	-0.959625	2.21331	-0.43357	0.664601	NA	Sfrp5	secreted frizzled-related sequence protein 5 [Source:MGI Symbol;Acc:MGI:1860298]
ENSMUSG00000018830	6.63637	-1.59291	2.0142	-0.790837	0.429039	NA	Myh11	myosin, heavy polypeptide 11, smooth muscle [Source:MGI Symbol;Acc:MGI:102643]
ENSMUSG00000018841	2.65379	1.10586	3.23476	0.341868	0.73245	NA	Rad51d	RAD51 paralog D [Source:MGI Symbol;Acc:MGI:1261809]
ENSMUSG00000018844	233.357	-1.14723	0.268474	-4.27315	1.93e-05	0.000642643	Fndc8	fibronectin type III domain containing 8 [Source:MGI Symbol;Acc:MGI:1926169]
ENSMUSG00000018845	3.42777	0.465638	2.29418	0.202965	0.839163	NA	Unc45b	unc-45 myosin chaperone B [Source:MGI Symbol;Acc:MGI:2443377]
ENSMUSG00000018846	12.1167	1.70611	0.987698	1.72736	0.0841037	0.51991	Pank3	pantothenate kinase 3 [Source:MGI Symbol;Acc:MGI:2387464]
[truncated: 20,115 more rows]

## Sheet: |fc|>1, p<0.05
ensembl_gene_id	baseMean	log2FoldChange	lfcSE	stat	pvalue	padj	external_gene_name	description
ENSMUSG00000060565	17.9697	5.91691	1.45331	4.07132	4.67e-05	0.00136757	Gm5591	predicted gene 5591 [Source:MGI Symbol;Acc:MGI:3648692]
ENSMUSG00000028517	18.4226	5.71002	1.3993	4.08064	4.49e-05	0.00132012	Plpp3	phospholipid phosphatase 3 [Source:MGI Symbol;Acc:MGI:1915166]
ENSMUSG00000038416	37.2559	5.66179	1.26475	4.47659	7.58e-06	0.000271896	Cdc16	CDC16 cell division cycle 16 [Source:MGI Symbol;Acc:MGI:1917207]
ENSMUSG00000021390	89.4744	4.74161	1.25776	3.76989	0.000163317	0.00413426	Ogn	osteoglycin [Source:MGI Symbol;Acc:MGI:109278]
ENSMUSG00000001506	15.2213	4.60326	0.959519	4.79747	1.61e-06	6.39e-05	Col1a1	collagen, type I, alpha 1 [Source:MGI Symbol;Acc:MGI:88467]
ENSMUSG00000074682	11.5463	4.58623	1.40236	3.27036	0.00107409	0.0216988	Zcchc3	zinc finger, CCHC domain containing 3 [Source:MGI Symbol;Acc:MGI:1915167]
ENSMUSG00000031533	13.5493	4.55717	1.46772	3.10494	0.0019032	0.0354977	Mrps31	mitochondrial ribosomal protein S31 [Source:MGI Symbol;Acc:MGI:1913153]
ENSMUSG00000038930	217.057	4.55577	1.22997	3.70398	0.000212244	0.00524436	Rccd1	RCC1 domain containing 1 [Source:MGI Symbol;Acc:MGI:2444156]
ENSMUSG00000000711	12.2328	4.53998	1.4784	3.07088	0.0021343	0.0390333	Rab5b	RAB5B, member RAS oncogene family [Source:MGI Symbol;Acc:MGI:105938]
ENSMUSG00000029661	18.9114	4.42121	0.929924	4.75437	1.99e-06	7.86e-05	Col1a2	collagen, type I, alpha 2 [Source:MGI Symbol;Acc:MGI:88468]
ENSMUSG00000050891	26.6916	4.23861	1.36525	3.10463	0.00190514	0.0354977	Tatdn1	TatD DNase domain containing 1 [Source:MGI Symbol;Acc:MGI:1916944]
ENSMUSG00000074619	219.212	3.9998	1.24005	3.22551	0.00125747	0.0246799	Fundc2b	FUN14 domain containing 2B [Source:MGI Symbol;Acc:MGI:1920547]
ENSMUSG00000029309	19.8904	3.37365	0.849615	3.9708	7.16e-05	0.00199222	Sparcl1	SPARC-like 1 [Source:MGI Symbol;Acc:MGI:108110]
ENSMUSG00000026840	19.5531	3.26827	0.895926	3.64792	0.000264367	0.00630725	Lamc3	laminin gamma 3 [Source:MGI Symbol;Acc:MGI:1344394]
ENSMUSG00000006464	15.2682	3.02149	0.991662	3.04689	0.00231219	0.0415658	Bbs1	Bardet-Biedl syndrome 1 [Source:MGI Symbol;Acc:MGI:1277215]
ENSMUSG00000057880	16.0879	2.83891	0.924771	3.06985	0.00214167	0.0390333	Abat	4-aminobutyrate aminotransferase [Source:MGI Symbol;Acc:MGI:2443582]
ENSMUSG00000089774	19.0161	2.69306	0.795712	3.38446	0.000713173	0.0151476	Slc5a3	solute carrier family 5 (inositol transporters), member 3 [Source:MGI Symbol;Acc:MGI:1858226]
ENSMUSG00000051503	19.5428	2.67345	0.849118	3.1485	0.00164108	0.0316086	Ccdc121rt3	coiled-coil domain containing 121, retrogene 3 [Source:MGI Symbol;Acc:MGI:3648511]
ENSMUSG00000047787	31.6514	2.64719	0.87552	3.02357	0.00249812	0.0443935	Flrt1	fibronectin leucine rich transmembrane protein 1 [Source:MGI Symbol;Acc:MGI:3026647]
ENSMUSG00000019899	28.6826	2.52643	0.74278	3.40132	0.000670605	0.0143913	Lama2	laminin, alpha 2 [Source:MGI Symbol;Acc:MGI:99912]
ENSMUSG00000062773	82.0649	2.41212	0.612611	3.93745	8.24e-05	0.00226999	Tex101	testis expressed gene 101 [Source:MGI Symbol;Acc:MGI:1930791]
ENSMUSG00000052911	47.9673	2.22398	0.453929	4.8994	9.61e-07	4e-05	Lamb2	laminin, beta 2 [Source:MGI Symbol;Acc:MGI:99916]
ENSMUSG00000039646	38.0038	2.00847	0.616583	3.25742	0.00112429	0.0223895	Vasn	vasorin [Source:MGI Symbol;Acc:MGI:2177651]
ENSMUSG00000025130	44.1387	1.94471	0.57307	3.39349	0.000690084	0.0147076	P4hb	prolyl 4-hydroxylase, beta polypeptide [Source:MGI Symbol;Acc:MGI:97464]
ENSMUSG00000040152	133.395	1.85838	0.573985	3.23769	0.00120503	0.0238013	Thbs1	thrombospondin 1 [Source:MGI Symbol;Acc:MGI:98737]
ENSMUSG00000024900	27.3687	1.75206	0.557653	3.14185	0.00167883	0.0320373	Cpt1a	carnitine palmitoyltransferase 1a, liver [Source:MGI Symbol;Acc:MGI:1098296]
ENSMUSG00000026576	205.506	1.68674	0.304352	5.54208	2.99e-08	1.56e-06	Atp1b1	ATPase, Na+/K+ transporting, beta 1 polypeptide [Source:MGI Symbol;Acc:MGI:88108]
ENSMUSG00000038252	93.5463	1.56615	0.502973	3.11379	0.00184701	0.0348181	Ncapd2	non-SMC condensin I complex, subunit D2 [Source:MGI Symbol;Acc:MGI:1915548]
ENSMUSG00000033732	43.5864	1.53188	0.5121	2.99137	0.00277733	0.0484843	Sf3b3	splicing factor 3b, subunit 3 [Source:MGI Symbol;Acc:MGI:1289341]
ENSMUSG00000000168	89.6971	1.5297	0.355857	4.29863	1.72e-05	0.000576138	Dlat	dihydrolipoamide S-acetyltransferase [Source:MGI Symbol;Acc:MGI:2385311]
ENSMUSG00000069041	45.7863	1.47011	0.439953	3.34153	0.000833194	0.0173405	Slc25a31	solute carrier family 25 (mitochondrial carrier; adenine nucleotide translocator), member 31 [Source:MGI Symbol;Acc:MGI:1920583]
ENSMUSG00000021577	71.7312	1.44252	0.420365	3.4316	0.000600035	0.0130119	Sdha	succinate dehydrogenase complex, subunit A, flavoprotein (Fp) [Source:MGI Symbol;Acc:MGI:1914195]
ENSMUSG00000032110	182.281	1.41835	0.375568	3.77654	0.000159022	0.00404204	Acrv1	acrosomal vesicle protein 1 [Source:MGI Symbol;Acc:MGI:104590]
ENSMUSG00000001016	64.9513	1.39757	0.417878	3.34444	0.00082448	0.0172169	Ilf2	interleukin enhancer binding factor 2 [Source:MGI Symbol;Acc:MGI:1915031]
ENSMUSG00000025982	174.701	1.36618	0.251748	5.42679	5.74e-08	2.85e-06	Sf3b1	splicing factor 3b, subunit 1 [Source:MGI Symbol;Acc:MGI:1932339]
ENSMUSG00000033161	52.3892	1.31549	0.440723	2.98484	0.00283729	0.0490947	Atp1a1	ATPase, Na+/K+ transporting, alpha 1 polypeptide [Source:MGI Symbol;Acc:MGI:88105]
ENSMUSG00000045210	80.3271	1.26347	0.389783	3.24147	0.00118914	0.0235625	Vcpip1	valosin containing protein (p97)/p47 complex interacting protein 1 [Source:MGI Symbol;Acc:MGI:1917925]
ENSMUSG00000033644	147.845	1.20732	0.323175	3.73581	0.00018711	0.00464183	Piwil2	piwi-like RNA-mediated gene silencing 2 [Source:MGI Symbol;Acc:MGI:1930036]
ENSMUSG00000040249	91.8967	1.20192	0.310547	3.87034	0.000108685	0.00293073	Lrp1	low density lipoprotein receptor-related protein 1 [Source:MGI Symbol;Acc:MGI:96828]
ENSMUSG00000042708	291.821	1.15976	0.306877	3.77923	0.000157314	0.00401508	Shcbp1l	Shc SH2-domain binding protein 1-like [Source:MGI Symbol;Acc:MGI:1919086]
ENSMUSG00000058626	102.072	1.11086	0.370023	3.00214	0.00268092	0.047236	Capn11	calpain 11 [Source:MGI Symbol;Acc:MGI:1352490]
ENSMUSG00000018425	101.88	1.08633	0.347005	3.1306	0.00174447	0.0331878	Dhx40	DEAH-box helicase 40 [Source:MGI Symbol;Acc:MGI:1914737]
ENSMUSG00000020705	62.9312	1.08491	0.36281	2.9903	0.00278703	0.0484843	Ddx42	DEAD box helicase 42 [Source:MGI Symbol;Acc:MGI:1919297]
ENSMUSG00000036598	134.278	1.02035	0.295924	3.44801	0.000564729	0.01242	Ccdc113	coiled-coil domain containing 113 [Source:MGI Symbol;Acc:MGI:3606076]
ENSMUSG00000068860	123.398	1.01584	0.311903	3.25691	0.00112633	0.0223895	Gm128	predicted gene 128 [Source:MGI Symbol;Acc:MGI:2684974]
ENSMUSG00000028436	267.253	-1.0007	0.223079	-4.48586	7.26e-06	0.000261857	Dcaf12	DDB1 and CUL4 associated factor 12 [Source:MGI Symbol;Acc:MGI:1916220]
ENSMUSG00000089911	187.765	-1.00386	0.320897	-3.1283	0.00175823	0.0333472	Mfsd14a	major facilitator superfamily domain containing 14A [Source:MGI Symbol;Acc:MGI:1201609]
ENSMUSG00000050114	278.815	-1.0284	0.217499	-4.72831	2.26e-06	8.89e-05	Prdx6b	peroxiredoxin 6B [Source:MGI Symbol;Acc:MGI:1336888]
ENSMUSG00000074746	1477.48	-1.03551	0.091334	-11.3376	8.55e-30	1.96e-27	Pdzd8	PDZ domain containing 8 [Source:MGI Symbol;Acc:MGI:2677270]
ENSMUSG00000070002	102.007	-1.03797	0.31791	-3.26496	0.00109478	0.0219735	Ell	elongation factor RNA polymerase II [Source:MGI Symbol;Acc:MGI:109377]
ENSMUSG00000039523	225.979	-1.04073	0.193688	-5.37323	7.73e-08	3.81e-06	Cep104	centrosomal protein 104 [Source:MGI Symbol;Acc:MGI:2687282]
ENSMUSG00000027177	136.766	-1.04154	0.319515	-3.25975	0.00111511	0.0223094	Hipk3	homeodomain interacting protein kinase 3 [Source:MGI Symbol;Acc:MGI:1314882]
ENSMUSG00000034075	343.616	-1.04204	0.20166	-5.16729	2.38e-07	1.09e-05	Zdhhc5	zinc finger, DHHC domain containing 5 [Source:MGI Symbol;Acc:MGI:1923573]
ENSMUSG00000038015	12593	-1.04542	0.279565	-3.73943	0.000184437	0.00459391	Prm2	protamine 2 [Source:MGI Symbol;Acc:MGI:97766]
ENSMUSG00000044340	1594.09	-1.04651	0.115826	-9.03521	1.64e-19	2.11e-17	Phlpp1	PH domain and leucine rich repeat protein phosphatase 1 [Source:MGI Symbol;Acc:MGI:2138327]
ENSMUSG00000027905	498.932	-1.04758	0.179627	-5.83196	5.48e-09	3.3e-07	Ddx20	DEAD box helicase 20 [Source:MGI Symbol;Acc:MGI:1858415]
ENSMUSG00000007033	3481.92	-1.04967	0.0991361	-10.5882	3.38e-26	5.99e-24	Hspa1l	heat shock protein 1-like [Source:MGI Symbol;Acc:MGI:96231]
ENSMUSG00000033319	1051.59	-1.06807	0.132413	-8.06621	7.25e-16	8.33e-14	Fem1c	fem 1 homolog c [Source:MGI Symbol;Acc:MGI:2444737]
ENSMUSG00000030041	137.266	-1.07689	0.281334	-3.82782	0.000129285	0.00336903	M1ap	meiosis 1 associated protein [Source:MGI Symbol;Acc:MGI:1315200]
ENSMUSG00000026182	17233.4	-1.07705	0.141051	-7.63593	2.24e-14	2.32e-12	Tnp1	transition protein 1 [Source:MGI Symbol;Acc:MGI:98784]
ENSMUSG00000047025	436.025	-1.08126	0.181679	-5.9515	2.66e-09	1.7e-07	Ccer1	coiled-coil glutamate-rich protein 1 [Source:MGI Symbol;Acc:MGI:1913966]
ENSMUSG00000031682	185.736	-1.09833	0.244472	-4.49265	7.03e-06	0.00025512	1700011L22Rik	RIKEN cDNA 1700011L22 gene [Source:MGI Symbol;Acc:MGI:1914937]
ENSMUSG00000005983	163.413	-1.09975	0.329594	-3.33668	0.000847848	0.0175865	1700037C18Rik	RIKEN cDNA 1700037C18 gene [Source:MGI Symbol;Acc:MGI:1920511]
ENSMUSG00000027431	252.306	-1.10256	0.227992	-4.83597	1.32e-06	5.37e-05	Scp2d1	SCP2 sterol-binding domain containing 1 [Source:MGI Symbol;Acc:MGI:1913578]
ENSMUSG00000009630	128.662	-1.10988	0.321234	-3.45505	0.000550185	0.0121432	Ppp2cb	protein phosphatase 2 (formerly 2A), catalytic subunit, beta isoform [Source:MGI Symbol;Acc:MGI:1321161]
ENSMUSG00000109737	929.388	-1.11221	0.158813	-7.00325	2.5e-12	2.18e-10	Spem3	SPEM family member 3 [Source:MGI Symbol;Acc:MGI:5622451]
ENSMUSG00000024014	99.0299	-1.1151	0.369286	-3.01962	0.00253093	0.0448481	Pim1	proviral integration site 1 [Source:MGI Symbol;Acc:MGI:97584]
ENSMUSG00000044320	329.739	-1.11825	0.243844	-4.58594	4.52e-06	0.000168857	1700001O22Rik	RIKEN cDNA 1700001O22 gene [Source:MGI Symbol;Acc:MGI:1923631]
ENSMUSG00000028287	2336.63	-1.12627	0.0906069	-12.4302	1.79e-35	5.85e-33	1700009N14Rik	RIKEN cDNA 1700009N14 gene [Source:MGI Symbol;Acc:MGI:1922721]
ENSMUSG00000026679	112.121	-1.12737	0.271644	-4.15017	3.32e-05	0.00102002	Enkur	enkurin, TRPC channel interacting protein [Source:MGI Symbol;Acc:MGI:1918483]
ENSMUSG00000000439	194.44	-1.13725	0.344788	-3.29842	0.000972323	0.0198489	Mkrn2	makorin, ring finger protein, 2 [Source:MGI Symbol;Acc:MGI:1914277]
ENSMUSG00000064370	173.773	-1.13823	0.35325	-3.22216	0.00127228	0.0248918	mt-Cytb	mitochondrially encoded cytochrome b [Source:MGI Symbol;Acc:MGI:102501]
ENSMUSG00000033917	152.747	-1.13884	0.23648	-4.81581	1.47e-06	5.9e-05	Gde1	glycerophosphodiester phosphodiesterase 1 [Source:MGI Symbol;Acc:MGI:1891827]
ENSMUSG00000042178	69.7319	-1.14658	0.376532	-3.0451	0.00232605	0.0416941	Armc5	armadillo repeat containing 5 [Source:MGI Symbol;Acc:MGI:2384586]
ENSMUSG00000018844	233.357	-1.14723	0.268474	-4.27315	1.93e-05	0.000642643	Fndc8	fibronectin type III domain containing 8 [Source:MGI Symbol;Acc:MGI:1926169]
ENSMUSG00000058446	79.0974	-1.14886	0.385393	-2.98101	0.00287296	0.0493576	Znrf2	zinc and ring finger 2 [Source:MGI Symbol;Acc:MGI:1196246]
ENSMUSG00000117477	421.601	-1.15041	0.194796	-5.90572	3.51e-09	2.18e-07	Gm50092	predicted gene, 50092 [Source:MGI Symbol;Acc:MGI:6275428]
ENSMUSG00000038057	4579.43	-1.15222	0.0905274	-12.7279	4.14e-37	1.51e-34	Dbil5	diazepam binding inhibitor-like 5 [Source:MGI Symbol;Acc:MGI:108039]
ENSMUSG00000024981	86.0057	-1.15932	0.351496	-3.29824	0.00097292	0.0198489	Acsl5	acyl-CoA synthetase long-chain family member 5 [Source:MGI Symbol;Acc:MGI:1919129]
ENSMUSG00000056508	565.495	-1.16025	0.200734	-5.78003	7.47e-09	4.37e-07	1700001K19Rik	RIKEN cDNA 1700001K19 gene [Source:MGI Symbol;Acc:MGI:1913573]
ENSMUSG00000031913	214.686	-1.16319	0.283568	-4.10196	4.1e-05	0.00121565	Vps4a	vacuolar protein sorting 4A [Source:MGI Symbol;Acc:MGI:1890520]
ENSMUSG00000039555	383.689	-1.16556	0.209238	-5.57051	2.54e-08	1.35e-06	Cylc2	cylicin, basic protein of sperm head cytoskeleton 2 [Source:MGI Symbol;Acc:MGI:1922164]
ENSMUSG00000050555	190.821	-1.16914	0.262603	-4.45213	8.5e-06	0.000301324	Hyls1	HYLS1, centriolar and ciliogenesis associated [Source:MGI Symbol;Acc:MGI:1924082]
ENSMUSG00000074212	147.492	-1.17246	0.321409	-3.64788	0.000264412	0.00630725	Dnajb14	DnaJ heat shock protein family (Hsp40) member B14 [Source:MGI Symbol;Acc:MGI:1917854]
ENSMUSG00000030747	185.296	-1.18072	0.251582	-4.69318	2.69e-06	0.000104924	Dgat2	diacylglycerol O-acyltransferase 2 [Source:MGI Symbol;Acc:MGI:1915050]
ENSMUSG00000064341	135.035	-1.18886	0.279277	-4.25692	2.07e-05	0.000687398	mt-Nd1	mitochondrially encoded NADH dehydrogenase 1 [Source:MGI Symbol;Acc:MGI:101787]
ENSMUSG00000003341	3041.72	-1.19113	0.152008	-7.83592	4.65e-15	4.89e-13	Atp8b3	ATPase, class I, type 8B, member 3 [Source:MGI Symbol;Acc:MGI:1914581]
ENSMUSG00000064225	274.013	-1.19429	0.179129	-6.66719	2.61e-11	1.88e-09	Paqr9	progestin and adipoQ receptor family member IX [Source:MGI Symbol;Acc:MGI:1922802]
ENSMUSG00000021791	160.58	-1.19483	0.245392	-4.86906	1.12e-06	4.61e-05	Dydc2	DPY30 domain containing 2 [Source:MGI Symbol;Acc:MGI:1918450]
ENSMUSG00000032566	183.302	-1.19556	0.231569	-5.16287	2.43e-07	1.11e-05	Nudt16l2	nudix hydrolase 16 like 2 [Source:MGI Symbol;Acc:MGI:1920782]
ENSMUSG00000051276	2995.39	-1.20681	0.081942	-14.7276	4.28e-49	2.95e-46	Actrt2	actin-related protein T2 [Source:MGI Symbol;Acc:MGI:1920603]
ENSMUSG00000020401	299.384	-1.20812	0.185186	-6.52381	6.85e-11	4.78e-09	Garin3	golgi associated RAB2 interactor 3 [Source:MGI Symbol;Acc:MGI:3650836]
ENSMUSG00000016626	84.5209	-1.20852	0.334466	-3.61329	0.000302337	0.00710262	Nlrp14	NLR family, pyrin domain containing 14 [Source:MGI Symbol;Acc:MGI:1924108]
ENSMUSG00000047502	474.535	-1.21328	0.165491	-7.33141	2.28e-13	2.11e-11	Mroh7	maestro heat-like repeat family member 7 [Source:MGI Symbol;Acc:MGI:2685873]
ENSMUSG00000052296	274.662	-1.21914	0.179012	-6.81037	9.73e-12	7.55e-10	Ppp6r1	protein phosphatase 6, regulatory subunit 1 [Source:MGI Symbol;Acc:MGI:2442163]
ENSMUSG00000008763	75.9937	-1.22325	0.315399	-3.87842	0.000105136	0.0028474	Man1a2	mannosidase, alpha, class 1A, member 2 [Source:MGI Symbol;Acc:MGI:104676]
ENSMUSG00000026579	132.493	-1.22519	0.389861	-3.14263	0.00167439	0.0320373	F5	coagulation factor V [Source:MGI Symbol;Acc:MGI:88382]
ENSMUSG00000053783	178.23	-1.22916	0.220791	-5.5671	2.59e-08	1.36e-06	Liat1	ligand of ATE1 [Source:MGI Symbol;Acc:MGI:1921480]
ENSMUSG00000099398	1049.62	-1.23383	0.111414	-11.0743	1.67e-28	3.35e-26	Ms4a14	membrane-spanning 4-domains, subfamily A, member 14 [Source:MGI Symbol;Acc:MGI:2686122]
ENSMUSG00000040852	425.052	-1.23594	0.148471	-8.32445	8.47e-17	1.01e-14	Plekhh2	pleckstrin homology domain containing, family H (with MyTH4 domain) member 2 [Source:MGI Symbol;Acc:MGI:2146813]
ENSMUSG00000050050	129.818	-1.24593	0.336562	-3.70193	0.000213967	0.00526597	Ccdc158	coiled-coil domain containing 158 [Source:MGI Symbol;Acc:MGI:2444555]
ENSMUSG00000020029	2098.62	-1.24657	0.0830474	-15.0104	6.28e-51	4.87e-48	Nudt4	nudix hydrolase 4 [Source:MGI Symbol;Acc:MGI:1918457]
ENSMUSG00000032244	666.907	-1.24885	0.221746	-5.63188	1.78e-08	9.78e-07	Fem1b	fem 1 homolog b [Source:MGI Symbol;Acc:MGI:1335087]
ENSMUSG00000038044	255.593	-1.25026	0.277841	-4.49991	6.8e-06	0.000248018	Cct8l1	chaperonin containing TCP1 subunit 8-like 1 [Source:MGI Symbol;Acc:MGI:2685289]
ENSMUSG00000029640	155.523	-1.25663	0.222113	-5.65761	1.53e-08	8.58e-07	Usp12	ubiquitin specific peptidase 12 [Source:MGI Symbol;Acc:MGI:1270128]
ENSMUSG00000031849	429.708	-1.25752	0.181078	-6.94462	3.79e-12	3.22e-10	Comp	cartilage oligomeric matrix protein [Source:MGI Symbol;Acc:MGI:88469]
ENSMUSG00000041566	967.1	-1.261	0.169395	-7.44415	9.76e-14	9.46e-12	Tssk1	testis-specific serine kinase 1 [Source:MGI Symbol;Acc:MGI:1347557]
ENSMUSG00000092519	1797.38	-1.26284	0.0902713	-13.9893	1.81e-44	8.64e-42	Actl9	actin-like 9 [Source:MGI Symbol;Acc:MGI:1916731]
ENSMUSG00000025527	56.5648	-1.2637	0.417897	-3.02395	0.00249498	0.0443935	Satl1	spermidine/spermine N1-acetyl transferase-like 1 [Source:MGI Symbol;Acc:MGI:1921059]
ENSMUSG00000029094	166.851	-1.26548	0.241504	-5.23999	1.61e-07	7.66e-06	Afap1	actin filament associated protein 1 [Source:MGI Symbol;Acc:MGI:1917542]
ENSMUSG00000049760	193.916	-1.26616	0.328988	-3.84864	0.000118775	0.00313465	Micos13	mitochondrial contact site and cristae organizing system subunit 13 [Source:MGI Symbol;Acc:MGI:2442174]
ENSMUSG00000029752	185.614	-1.26616	0.306638	-4.12917	3.64e-05	0.00110687	Asns	asparagine synthetase [Source:MGI Symbol;Acc:MGI:1350929]
ENSMUSG00000090369	6010.23	-1.26872	0.117766	-10.7732	4.6e-27	8.65e-25	4933411K16Rik	RIKEN cDNA 4933411K16 gene [Source:MGI Symbol;Acc:MGI:1914015]
ENSMUSG00000034994	4169.23	-1.27431	0.0832836	-15.3009	7.54e-53	7.79e-50	Eef2	eukaryotic translation elongation factor 2 [Source:MGI Symbol;Acc:MGI:95288]
ENSMUSG00000064351	680.856	-1.27649	0.185818	-6.86959	6.44e-12	5.19e-10	mt-Co1	mitochondrially encoded cytochrome c oxidase I [Source:MGI Symbol;Acc:MGI:102504]
ENSMUSG00000004798	148.024	-1.28955	0.309937	-4.16069	3.17e-05	0.000988851	Ulk2	unc-51 like kinase 2 [Source:MGI Symbol;Acc:MGI:1352758]
ENSMUSG00000074749	240.033	-1.29481	0.192099	-6.74036	1.58e-11	1.18e-09	Kiz	kizuna centrosomal protein [Source:MGI Symbol;Acc:MGI:2684960]
ENSMUSG00000022270	293.008	-1.29504	0.189553	-6.83208	8.37e-12	6.57e-10	Retreg1	reticulophagy regulator 1 [Source:MGI Symbol;Acc:MGI:1913520]
ENSMUSG00000035295	958.999	-1.29731	0.264721	-4.90065	9.55e-07	4e-05	Wdr38	WD repeat domain 38 [Source:MGI Symbol;Acc:MGI:1923896]
ENSMUSG00000035095	102.225	-1.29937	0.320739	-4.05116	5.1e-05	0.00147012	Fam167a	family with sequence similarity 167, member A [Source:MGI Symbol;Acc:MGI:3606565]
ENSMUSG00000043429	558.134	-1.29946	0.161359	-8.05324	8.06e-16	9.09e-14	Ccdc185	coiled-coil domain containing 185 [Source:MGI Symbol;Acc:MGI:3618292]
ENSMUSG00000000942	71.5073	-1.3076	0.387578	-3.37376	0.000741496	0.015642	Hoxa4	homeobox A4 [Source:MGI Symbol;Acc:MGI:96176]
ENSMUSG00000041161	217.836	-1.31966	0.226923	-5.81547	6.05e-09	3.61e-07	Otud3	OTU domain containing 3 [Source:MGI Symbol;Acc:MGI:1920412]
ENSMUSG00000078161	466.074	-1.3299	0.146238	-9.09403	9.54e-20	1.26e-17	Erich3	glutamate rich 3 [Source:MGI Symbol;Acc:MGI:1919095]
ENSMUSG00000028639	185.92	-1.33372	0.264412	-5.04412	4.56e-07	1.99e-05	Ybx1	Y box protein 1 [Source:MGI Symbol;Acc:MGI:99146]
ENSMUSG00000067194	101.718	-1.34012	0.407591	-3.28791	0.00100936	0.0205247	Eif1ax	eukaryotic translation initiation factor 1A, X-linked [Source:MGI Symbol;Acc:MGI:1913485]
ENSMUSG00000031985	208.365	-1.36652	0.256639	-5.32468	1.01e-07	4.9e-06	Gnpat	glyceronephosphate O-acyltransferase [Source:MGI Symbol;Acc:MGI:1343460]
ENSMUSG00000021116	96.061	-1.37268	0.433206	-3.16864	0.00153152	0.0296828	Eif2s1	eukaryotic translation initiation factor 2, subunit 1 alpha [Source:MGI Symbol;Acc:MGI:95299]
ENSMUSG00000007950	131.351	-1.37387	0.250897	-5.47584	4.35e-08	2.23e-06	Abhd8	abhydrolase domain containing 8 [Source:MGI Symbol;Acc:MGI:1918946]
ENSMUSG00000014905	53.0365	-1.37796	0.391266	-3.52179	0.000428649	0.00977382	Dnajb9	DnaJ heat shock protein family (Hsp40) member B9 [Source:MGI Symbol;Acc:MGI:1351618]
ENSMUSG00000121583	136.853	-1.37876	0.32734	-4.21202	2.53e-05	0.000817545	Zftraf1	zinc finger TRAF type containing 1 [Source:NCBI gene (formerly Entrezgene);Acc:54151]
ENSMUSG00000066382	195.434	-1.38247	0.305779	-4.52114	6.15e-06	0.000227067	Iqcf5	IQ motif containing F5 [Source:MGI Symbol;Acc:MGI:1922720]
ENSMUSG00000048206	758.274	-1.3844	0.213023	-6.49883	8.09e-11	5.58e-09	Dnajb8	DnaJ heat shock protein family (Hsp40) member B8 [Source:MGI Symbol;Acc:MGI:1922801]
ENSMUSG00000044468	2379.8	-1.38854	0.136662	-10.1604	2.98e-24	4.74e-22	Tent5c	terminal nucleotidyltransferase 5C [Source:MGI Symbol;Acc:MGI:1921895]
ENSMUSG00000070639	2763.22	-1.3973	0.0754515	-18.5192	1.45e-76	2.99e-73	Lrrc8b	leucine rich repeat containing 8 family, member B [Source:MGI Symbol;Acc:MGI:2141353]
ENSMUSG00000045176	34.8759	-1.40903	0.455586	-3.09279	0.00198285	0.0367093	Borcs6	BLOC-1 related complex subunit 6 [Source:MGI Symbol;Acc:MGI:1919173]
ENSMUSG00000020020	216.826	-1.4134	0.279341	-5.05979	4.2e-07	1.86e-05	Usp44	ubiquitin specific peptidase 44 [Source:MGI Symbol;Acc:MGI:3045318]
ENSMUSG00000051437	1411.88	-1.41409	0.118269	-11.9565	6e-33	1.69e-30	Ubqlnl	ubiquilin-like [Source:MGI Symbol;Acc:MGI:2685336]
ENSMUSG00000037885	751.32	-1.42192	0.153318	-9.27436	1.79e-20	2.41e-18	Stk35	serine/threonine kinase 35 [Source:MGI Symbol;Acc:MGI:1914583]
ENSMUSG00000041629	318.622	-1.43194	0.263022	-5.44416	5.2e-08	2.65e-06	Vcf1	VCP nuclear cofactor family member 1 [Source:MGI Symbol;Acc:MGI:106351]
ENSMUSG00000039275	154.43	-1.4366	0.277945	-5.16864	2.36e-07	1.09e-05	Foxk2	forkhead box K2 [Source:MGI Symbol;Acc:MGI:1916087]
ENSMUSG00000029310	174.371	-1.44322	0.260636	-5.5373	3.07e-08	1.59e-06	Nudt9	nudix hydrolase 9 [Source:MGI Symbol;Acc:MGI:1921417]
ENSMUSG00000045435	36.3	-1.44841	0.482259	-3.00338	0.00267002	0.047178	Tmem60	transmembrane protein 60 [Source:MGI Symbol;Acc:MGI:2673965]
ENSMUSG00000043415	69.3308	-1.45422	0.411135	-3.53708	0.000404579	0.00932788	Otud1	OTU domain containing 1 [Source:MGI Symbol;Acc:MGI:1918448]
ENSMUSG00000002105	72.2112	-1.45772	0.371364	-3.92531	8.66e-05	0.0023665	Slc39a13	solute carrier family 39 (metal ion transporter), member 13 [Source:MGI Symbol;Acc:MGI:1915677]
ENSMUSG00000045521	2452.03	-1.46788	0.104786	-14.0084	1.38e-44	7.15e-42	Tssk2	testis-specific serine kinase 2 [Source:MGI Symbol;Acc:MGI:1347559]
ENSMUSG00000029814	164.233	-1.47845	0.250806	-5.89479	3.75e-09	2.3e-07	Igf2bp3	insulin-like growth factor 2 mRNA binding protein 3 [Source:MGI Symbol;Acc:MGI:1890359]
ENSMUSG00000044084	1813.35	-1.47873	0.104402	-14.1637	1.54e-45	8.66e-43	Spem2	SPEM family member 2 [Source:MGI Symbol;Acc:MGI:1918293]
ENSMUSG00000042446	60.7806	-1.49052	0.427345	-3.48785	0.000486913	0.0109019	Zmym4	zinc finger, MYM-type 4 [Source:MGI Symbol;Acc:MGI:1915035]
ENSMUSG00000041009	570.484	-1.49637	0.22615	-6.61672	3.67e-11	2.59e-09	Iqcf4	IQ motif containing F4 [Source:MGI Symbol;Acc:MGI:1914570]
ENSMUSG00000069237	346.324	-1.51228	0.185026	-8.17334	3e-16	3.51e-14	Fam8a1	family with sequence similarity 8, member A1 [Source:MGI Symbol;Acc:MGI:2145496]
ENSMUSG00000078320	69.7409	-1.52044	0.395702	-3.84238	0.000121849	0.00318863	Tex13c1	TEX13 family member C1 [Source:MGI Symbol;Acc:MGI:2685208]
ENSMUSG00000036241	81.7698	-1.53444	0.332315	-4.61741	3.89e-06	0.000148755	Ube2r2	ubiquitin-conjugating enzyme E2R 2 [Source:MGI Symbol;Acc:MGI:1914865]
ENSMUSG00000002733	85.0276	-1.54862	0.434066	-3.56771	0.000360116	0.00836495	Plekha3	pleckstrin homology domain-containing, family A (phosphoinositide binding specific) member 3 [Source:MGI Symbol;Acc:MGI:1932515]
ENSMUSG00000022972	124.219	-1.55618	0.413198	-3.76619	0.000165756	0.00416201	Cfap298	cilia and flagella associate protien 298 [Source:MGI Symbol;Acc:MGI:1915251]
ENSMUSG00000007892	230.996	-1.56325	0.340524	-4.59072	4.42e-06	0.000166037	Rplp1	ribosomal protein lateral stalk subunit P1 [Source:MGI Symbol;Acc:MGI:1927099]
ENSMUSG00000033794	568.269	-1.57036	0.131392	-11.9517	6.36e-33	1.72e-30	Lpcat2b	lysophosphatidylcholine acyltransferase 2B [Source:MGI Symbol;Acc:MGI:1918152]
ENSMUSG00000057116	301.926	-1.57531	0.197094	-7.99268	1.32e-15	1.46e-13	Semp2l2a	SUMO/sentrin specific peptidase 2-like 2A [Source:MGI Symbol;Acc:MGI:2667157]
ENSMUSG00000034765	32.777	-1.58702	0.520632	-3.04827	0.00230167	0.0414969	Dusp5	dual specificity phosphatase 5 [Source:MGI Symbol;Acc:MGI:2685183]
ENSMUSG00000041040	140.702	-1.59785	0.297773	-5.36601	8.05e-08	3.93e-06	Fam117b	family with sequence similarity 117, member B [Source:MGI Symbol;Acc:MGI:1920000]
ENSMUSG00000030230	211.328	-1.60693	0.365603	-4.39529	1.11e-05	0.000387622	Plcz1	phospholipase C, zeta 1 [Source:MGI Symbol;Acc:MGI:2150308]
ENSMUSG00000003345	773.881	-1.61252	0.419439	-3.84447	0.000120813	0.00317493	Csnk1g2	casein kinase 1, gamma 2 [Source:MGI Symbol;Acc:MGI:1920014]
ENSMUSG00000063089	156.798	-1.61668	0.444046	-3.64079	0.000271808	0.00645882	Klk1b8	kallikrein 1-related peptidase b8 [Source:MGI Symbol;Acc:MGI:892018]
ENSMUSG00000018554	1190.61	-1.62157	0.173728	-9.33393	1.02e-20	1.41e-18	Ybx2	Y box protein 2 [Source:MGI Symbol;Acc:MGI:1096372]
ENSMUSG00000040489	409.082	-1.64495	0.171507	-9.59115	8.71e-22	1.29e-19	Sox30	SRY (sex determining region Y)-box 30 [Source:MGI Symbol;Acc:MGI:1341157]
ENSMUSG00000029828	1619.63	-1.64895	0.134393	-12.2697	1.32e-34	4.09e-32	Spmip4	sperm microtubule inner protein 4 [Source:MGI Symbol;Acc:MGI:1918071]
ENSMUSG00000066324	384.041	-1.65656	0.16512	-10.0325	1.1e-23	1.7e-21	Bpnt2	3'(2'), 5'-bisphosphate nucleotidase 2 [Source:MGI Symbol;Acc:MGI:1915720]
ENSMUSG00000015599	947.378	-1.66601	0.141926	-11.7386	8.08e-32	2.09e-29	Ttbk1	tau tubulin kinase 1 [Source:MGI Symbol;Acc:MGI:2147036]
ENSMUSG00000027562	421.723	-1.67611	0.226143	-7.41173	1.25e-13	1.19e-11	Car2	carbonic anhydrase 2 [Source:MGI Symbol;Acc:MGI:88269]
ENSMUSG00000031029	83.5587	-1.69299	0.401753	-4.214	2.51e-05	0.000814659	Eif3f	eukaryotic translation initiation factor 3, subunit F [Source:MGI Symbol;Acc:MGI:1913335]
ENSMUSG00000044787	301.758	-1.69463	0.250868	-6.7551	1.43e-11	1.08e-09	Spata32	spermatogenesis associated 32 [Source:MGI Symbol;Acc:MGI:3045340]
ENSMUSG00000039168	34.4073	-1.70198	0.537681	-3.16541	0.00154866	0.0299214	Dap	death-associated protein [Source:MGI Symbol;Acc:MGI:1918190]
ENSMUSG00000029707	1364.53	-1.70355	0.123254	-13.8215	1.89e-43	8.38e-41	Fscn3	fascin actin-bundling protein 3 [Source:MGI Symbol;Acc:MGI:1890386]
ENSMUSG00000024729	330.737	-1.70452	0.224298	-7.59936	2.98e-14	3.03e-12	Ms4a20	membrane-spanning 4-domains, subfamily A, member 20 [Source:MGI Symbol;Acc:MGI:1916619]
ENSMUSG00000043091	115.248	-1.7061	0.405584	-4.20653	2.59e-05	0.000833315	Tuba1c	tubulin, alpha 1C [Source:MGI Symbol;Acc:MGI:1095409]
ENSMUSG00000025743	34.5003	-1.71283	0.511295	-3.34999	0.000808137	0.0169327	Sdc3	syndecan 3 [Source:MGI Symbol;Acc:MGI:1349163]
ENSMUSG00000028016	75.1412	-1.72813	0.49348	-3.50193	0.000461893	0.010455	Ints12	integrator complex subunit 12 [Source:MGI Symbol;Acc:MGI:1919043]
ENSMUSG00000026473	160.644	-1.73216	0.521888	-3.31902	0.00090334	0.0185514	Glul	glutamate-ammonia ligase [Source:MGI Symbol;Acc:MGI:95739]
ENSMUSG00000019578	1122.84	-1.73404	0.142192	-12.1951	3.3e-34	9.75e-32	Ubxn6	UBX domain protein 6 [Source:MGI Symbol;Acc:MGI:1913780]
ENSMUSG00000040105	353.315	-1.74153	0.156423	-11.1335	8.62e-29	1.78e-26	Plpp6	phospholipid phosphatase 6 [Source:MGI Symbol;Acc:MGI:1921661]
ENSMUSG00000041165	1551.04	-1.74446	0.0897042	-19.4468	3.1e-84	9.62e-81	Spem1	spermatid maturation 1 [Source:MGI Symbol;Acc:MGI:1921538]
ENSMUSG00000050107	1481.22	-1.77676	0.10274	-17.2937	5.25e-67	8.13e-64	Haspin	histone H3 associated protein kinase [Source:MGI Symbol;Acc:MGI:1194498]
ENSMUSG00000070388	361.856	-1.79362	0.158682	-11.3032	1.27e-29	2.8e-27	Fbxo39	F-box protein 39 [Source:MGI Symbol;Acc:MGI:3505735]
ENSMUSG00000074922	27.8469	-1.79572	0.508591	-3.53078	0.000414336	0.00950303	Pabir1	PP2A A alpha (PPP2R1A) and B55A (PPP2R2A) interacting phosphatase regulator 1 [Source:MGI Symbol;Acc:MGI:1915284]
ENSMUSG00000030994	70.2653	-1.81151	0.490691	-3.69175	0.000222717	0.00543816	D7Ertd443e	DNA segment, Chr 7, ERATO Doi 443, expressed [Source:MGI Symbol;Acc:MGI:1196431]
ENSMUSG00000067438	54.0615	-1.85965	0.468101	-3.97275	7.1e-05	0.00199092	Hmx1	H6 homeobox 1 [Source:MGI Symbol;Acc:MGI:107178]
ENSMUSG00000037979	633.468	-1.87381	0.128104	-14.6272	1.88e-48	1.17e-45	Ccdc92	coiled-coil domain containing 92 [Source:MGI Symbol;Acc:MGI:106485]
ENSMUSG00000038467	72.2501	-1.87396	0.612795	-3.05806	0.00222776	0.0403993	Chmp4b	charged multivesicular body protein 4B [Source:MGI Symbol;Acc:MGI:1922858]
ENSMUSG00000046957	3013.67	-1.90411	0.120497	-15.8021	3.01e-56	3.73e-53	Spz1	spermatogenic leucine zipper 1 [Source:MGI Symbol;Acc:MGI:1930801]
ENSMUSG00000028458	1067.28	-1.93039	0.150768	-12.8037	1.56e-37	6.06e-35	Tesk1	testis specific protein kinase 1 [Source:MGI Symbol;Acc:MGI:1201675]
ENSMUSG00000036432	181.526	-1.95533	0.258553	-7.56257	3.95e-14	3.89e-12	Siah2	siah E3 ubiquitin protein ligase 2 [Source:MGI Symbol;Acc:MGI:108062]
ENSMUSG00000049792	700.571	-1.96937	0.192358	-10.2381	1.34e-24	2.19e-22	Bag5	BCL2-associated athanogene 5 [Source:MGI Symbol;Acc:MGI:1917619]
ENSMUSG00000034300	90.9749	-1.97136	0.470517	-4.18977	2.79e-05	0.000883568	Fam53c	family with sequence similarity 53, member C [Source:MGI Symbol;Acc:MGI:1913556]
ENSMUSG00000031530	85.42	-1.97714	0.519753	-3.804	0.000142379	0.00366405	Dusp4	dual specificity phosphatase 4 [Source:MGI Symbol;Acc:MGI:2442191]
ENSMUSG00000027077	23.3319	-1.98244	0.616473	-3.21579	0.00130088	0.0253713	Smtnl1	smoothelin-like 1 [Source:MGI Symbol;Acc:MGI:1915928]
ENSMUSG00000095789	137.461	-2.00016	0.612531	-3.26541	0.00109306	0.0219735	Nupr2	nuclear protein transcriptional regulator 2 [Source:MGI Symbol;Acc:MGI:1923099]
ENSMUSG00000067199	653.962	-2.00414	0.192902	-10.3894	2.77e-25	4.77e-23	Frat1	frequently rearranged in advanced T cell lymphomas [Source:MGI Symbol;Acc:MGI:109450]
ENSMUSG00000026626	44.751	-2.01211	0.487791	-4.12494	3.71e-05	0.0011219	Ppp2r5a	protein phosphatase 2, regulatory subunit B', alpha [Source:MGI Symbol;Acc:MGI:2388479]
ENSMUSG00000025171	243.864	-2.01581	0.252717	-7.97655	1.5e-15	1.64e-13	Ubtd1	ubiquitin domain containing 1 [Source:MGI Symbol;Acc:MGI:2385092]
ENSMUSG00000037279	128.896	-2.02105	0.420523	-4.80604	1.54e-06	6.16e-05	Ovol2	ovo like zinc finger 2 [Source:MGI Symbol;Acc:MGI:1338039]
ENSMUSG00000071076	413.271	-2.02508	0.280428	-7.2214	5.15e-13	4.56e-11	Jund	jun D proto-oncogene [Source:MGI Symbol;Acc:MGI:96648]
ENSMUSG00000047604	147.591	-2.04867	0.297924	-6.87651	6.13e-12	5.01e-10	Frat2	frequently rearranged in advanced T cell lymphomas 2 [Source:MGI Symbol;Acc:MGI:2673967]
ENSMUSG00000000125	334.582	-2.05316	0.48437	-4.23882	2.25e-05	0.000733458	Wnt3	wingless-type MMTV integration site family, member 3 [Source:MGI Symbol;Acc:MGI:98955]
ENSMUSG00000020307	379.936	-2.07513	0.41965	-4.9449	7.62e-07	3.26e-05	Cdc34	cell division cycle 34 [Source:MGI Symbol;Acc:MGI:102657]
ENSMUSG00000074817	1538.62	-2.07872	0.157105	-13.2314	5.78e-40	2.39e-37	Papolb	poly (A) polymerase beta (testis specific) [Source:MGI Symbol;Acc:MGI:1932115]
ENSMUSG00000090100	409.283	-2.0882	0.307338	-6.79448	1.09e-11	8.32e-10	Ttbk2	tau tubulin kinase 2 [Source:MGI Symbol;Acc:MGI:2155779]
ENSMUSG00000008429	571.544	-2.108	0.20435	-10.3157	5.99e-25	1e-22	Herpud2	HERPUD family member 2 [Source:MGI Symbol;Acc:MGI:1915393]
ENSMUSG00000064363	68.9805	-2.11029	0.51445	-4.10203	4.1e-05	0.00121565	mt-Nd4	mitochondrially encoded NADH dehydrogenase 4 [Source:MGI Symbol;Acc:MGI:102498]
ENSMUSG00000020393	84.0682	-2.11919	0.349237	-6.06807	1.29e-09	8.54e-08	Kremen1	kringle containing transmembrane protein 1 [Source:MGI Symbol;Acc:MGI:1933988]
ENSMUSG00000050612	673.578	-2.12437	0.21574	-9.84687	7.07e-23	1.07e-20	Txndc2	thioredoxin domain containing 2 (spermatozoa) [Source:MGI Symbol;Acc:MGI:2389312]
ENSMUSG00000030189	1349.01	-2.13747	0.249272	-8.57487	9.92e-18	1.21e-15	Ybx3	Y box protein 3 [Source:MGI Symbol;Acc:MGI:2137670]
ENSMUSG00000064202	500.027	-2.16368	0.185045	-11.6927	1.39e-31	3.44e-29	Spata6l	spermatogenesis associated 6 like [Source:MGI Symbol;Acc:MGI:1918036]
ENSMUSG00000057706	236.903	-2.16805	0.195958	-11.0638	1.88e-28	3.64e-26	Mex3b	mex3 RNA binding family member B [Source:MGI Symbol;Acc:MGI:1918252]
ENSMUSG00000049106	650.797	-2.20746	0.190664	-11.5777	5.34e-31	1.27e-28	Dcaf5	DDB1 and CUL4 associated factor 5 [Source:MGI Symbol;Acc:MGI:2444785]
ENSMUSG00000038500	52.2278	-2.23976	0.609836	-3.67272	0.000239978	0.00579121	Prr3	proline-rich polypeptide 3 [Source:MGI Symbol;Acc:MGI:1922460]
ENSMUSG00000067274	78.4073	-2.26759	0.417633	-5.42963	5.65e-08	2.82e-06	Rplp0	ribosomal protein lateral stalk subunit P0 [Source:MGI Symbol;Acc:MGI:1927636]
ENSMUSG00000052906	187.924	-2.32283	0.402693	-5.76825	8.01e-09	4.64e-07	Ubxn8	UBX domain protein 8 [Source:MGI Symbol;Acc:MGI:1337129]
ENSMUSG00000055239	116.336	-2.32964	0.603801	-3.85828	0.000114186	0.0030394	Kcmf1	potassium channel modulatory factor 1 [Source:MGI Symbol;Acc:MGI:1921537]
ENSMUSG00000037621	23.4556	-2.33191	0.672938	-3.46526	0.000529715	0.0117332	Atoh8	atonal bHLH transcription factor 8 [Source:MGI Symbol;Acc:MGI:1918343]
ENSMUSG00000003032	97.8448	-2.40303	0.375051	-6.40722	1.48e-10	9.99e-09	Klf4	Kruppel-like transcription factor 4 (gut) [Source:MGI Symbol;Acc:MGI:1342287]
ENSMUSG00000047518	2189.71	-2.40328	0.1125	-21.3625	2.98e-101	1.85e-97	Slfnl1	schlafen like 1 [Source:MGI Symbol;Acc:MGI:3045330]
ENSMUSG00000054000	19.8806	-2.45499	0.803247	-3.05633	0.00224066	0.0405148	Tusc1	tumor suppressor candidate 1 [Source:MGI Symbol;Acc:MGI:2684283]
ENSMUSG00000040824	339.468	-2.46491	0.568107	-4.33881	1.43e-05	0.000485497	Snrpd2	small nuclear ribonucleoprotein D2 [Source:MGI Symbol;Acc:MGI:98345]
ENSMUSG00000006356	54.1554	-2.54065	0.420865	-6.03673	1.57e-09	1.03e-07	Crip2	cysteine rich protein 2 [Source:MGI Symbol;Acc:MGI:1915587]
ENSMUSG00000074406	46.741	-2.61817	0.530729	-4.93316	8.09e-07	3.41e-05	Zfp628	zinc finger protein 628 [Source:MGI Symbol;Acc:MGI:2665174]
ENSMUSG00000050192	77.9877	-2.6863	0.668696	-4.01721	5.89e-05	0.00168312	Eif5a2	eukaryotic translation initiation factor 5A2 [Source:MGI Symbol;Acc:MGI:1933735]
ENSMUSG00000043252	479.269	-2.70038	0.179306	-15.0602	2.96e-51	2.62e-48	Tmem64	transmembrane protein 64 [Source:MGI Symbol;Acc:MGI:2140359]
ENSMUSG00000064368	194.714	-2.83426	0.327101	-8.66477	4.52e-18	5.61e-16	mt-Nd6	mitochondrially encoded NADH dehydrogenase 6 [Source:MGI Symbol;Acc:MGI:102495]
ENSMUSG00000007682	44.2734	-2.94709	0.857156	-3.43822	0.000585561	0.0127426	Dio2	deiodinase, iodothyronine, type II [Source:MGI Symbol;Acc:MGI:1338833]
ENSMUSG00000037253	223.615	-2.97388	0.279047	-10.6573	1.61e-26	2.94e-24	Mex3c	mex3 RNA binding family member C [Source:MGI Symbol;Acc:MGI:2652843]
ENSMUSG00000044813	27.3777	-3.00727	0.723085	-4.15895	3.2e-05	0.000991445	Shb	src homology 2 domain-containing transforming protein B [Source:MGI Symbol;Acc:MGI:98294]
ENSMUSG00000038822	30.533	-3.21125	0.64167	-5.00452	5.6e-07	2.41e-05	Hace1	HECT domain and ankyrin repeat containing, E3 ubiquitin protein ligase 1 [Source:MGI Symbol;Acc:MGI:2446110]
ENSMUSG00000026525	14.5633	-3.22176	0.912628	-3.5302	0.000415241	0.00950303	Opn3	opsin 3 [Source:MGI Symbol;Acc:MGI:1338022]
ENSMUSG00000029203	105.475	-3.65383	0.808646	-4.51845	6.23e-06	0.000228606	Ube2k	ubiquitin-conjugating enzyme E2K [Source:MGI Symbol;Acc:MGI:1858216]
ENSMUSG00000053414	28.4299	-4.70964	1.57519	-2.98988	0.00279086	0.0484843	Hunk	hormonally upregulated Neu-associated kinase [Source:MGI Symbol;Acc:MGI:1347352]
ENSMUSG00000028081	34.9499	-5.37411	1.45987	-3.68123	0.000232108	0.00562319	Rps3a1	ribosomal protein S3A1 [Source:MGI Symbol;Acc:MGI:1202063]
ENSMUSG00000034403	43.2551	-5.39566	1.31292	-4.10965	3.96e-05	0.00118725	Pja1	praja ring finger ubiquitin ligase 1 [Source:MGI Symbol;Acc:MGI:1101765]
ENSMUSG00000034139	42.3102	-5.87495	1.65712	-3.54528	0.000392191	0.009076	Serpini2	serine (or cysteine) peptidase inhibitor, clade I, member 2 [Source:MGI Symbol;Acc:MGI:1915181]
ENSMUSG00000074818	23.5998	-6.21419	1.60854	-3.86326	0.000111885	0.00299099	Pdzd7	PDZ domain containing 7 [Source:MGI Symbol;Acc:MGI:3608325]
ENSMUSG00000018740	3796.56	-6.969	1.24896	-5.57983	2.41e-08	1.29e-06	Slc25a35	solute carrier family 25, member 35 [Source:MGI Symbol;Acc:MGI:1919248]
