# Supplementary material for: Targeted mRNP-phagy licenses translational activation during cellular metamorphosis
Source: Research Square preprint supplement (doi:10.21203/rs.3.rs-6289188/v1), 2025-05-06
Supplement: Supplementary file 8 [file ab9332e381dff0065e31dff4.xlsx]

## Sheet: Mex3d_RS-WT_RS
Transcript.stable.ID	baseMean	log2FoldChange	lfcSE	stat	pvalue	padj	MR1	MR2	MR3	WR1	WR2	WR3	Gene.name	Gene.stable.ID	Gene.description
ENSMUST00000105350	867.757	-1.18025	0.0913924	-12.9141	3.75e-38	4.84e-35	545.493	525.827	523.766	1073.95	1295.14	1242.37	Mex3d	ENSMUSG00000048696	mex3 RNA binding family member D [Source:MGI Symbol;Acc:MGI:2681847]
ENSMUST00000122709	1537.25	-1.14415	0.0886647	-12.9042	4.26e-38	4.84e-35	1020.89	963.714	886.579	2213.55	2247.62	1891.15	Gm22721	ENSMUSG00000084658	predicted gene, 22721 [Source:MGI Symbol;Acc:MGI:5452498]
ENSMUST00000062990	623.536	0.660406	0.0943984	6.99594	2.63e-12	1.99e-09	834.865	716.213	740.743	479.375	480.885	489.134	Slfnl1	ENSMUSG00000047518	schlafen like 1 [Source:MGI Symbol;Acc:MGI:3045330]
ENSMUST00000055374	814.637	0.559799	0.0905374	6.18307	6.29e-10	3.57e-07	1024.48	944.676	946.159	642.883	608.657	720.963	Tssk2	ENSMUSG00000045521	testis-specific serine kinase 2 [Source:MGI Symbol;Acc:MGI:1347559]
ENSMUST00000156292	567.063	0.574438	0.0954693	6.01699	1.78e-09	8.06e-07	644.347	737.065	654.486	445.93	461.139	459.412	Asb17os	ENSMUSG00000086438	ankyrin repeat and SOCS box-containing 17, opposite strand [Source:MGI Symbol;Acc:MGI:1919567]
ENSMUST00000060062	544.491	0.669919	0.116995	5.72606	1.03e-08	3.89e-06	752.187	573.877	682.941	395.144	382.153	480.642	Actrt2	ENSMUSG00000051276	actin-related protein T2 [Source:MGI Symbol;Acc:MGI:1920603]
ENSMUST00000054145	179.763	0.85036	0.1527	5.56881	2.56e-08	8.31e-06	257.02	198.545	240.097	110.244	126.61	146.061	Dcaf5	ENSMUSG00000049106	DDB1 and CUL4 associated factor 5 [Source:MGI Symbol;Acc:MGI:2444785]
ENSMUST00000032233	349.23	0.615966	0.113787	5.41333	6.19e-08	1.75e-05	460.119	412.502	397.493	260.126	263.674	301.463	Tuba8	ENSMUSG00000030137	tubulin, alpha 8 [Source:MGI Symbol;Acc:MGI:1858225]
ENSMUST00000080123	714.563	0.478263	0.089957	5.31658	1.06e-07	2.42e-05	892.38	790.554	813.661	609.438	565.679	615.663	Aldoart2	ENSMUSG00000063129	aldolase 1 A, retrogene 2 [Source:MGI Symbol;Acc:MGI:1931052]
ENSMUST00000116172	142.933	0.848676	0.159668	5.31524	1.07e-07	2.42e-05	169.849	201.265	178.739	110.244	109.187	88.3158	Gm11175	ENSMUSG00000080058	predicted gene 11175 [Source:MGI Symbol;Acc:MGI:3809055]
ENSMUST00000027374	468.097	0.582523	0.111159	5.24044	1.6e-07	3.16e-05	532.013	640.965	513.095	357.983	357.76	406.762	Tnp1	ENSMUSG00000026182	transition protein 1 [Source:MGI Symbol;Acc:MGI:98784]
ENSMUST00000029007	153.566	0.834402	0.159514	5.23091	1.69e-07	3.16e-05	226.465	165.001	199.191	112.721	103.379	114.641	Fam209	ENSMUSG00000027505	family with sequence similarity 209 [Source:MGI Symbol;Acc:MGI:1923676]
ENSMUST00000112707	752.39	0.513362	0.098388	5.21773	1.81e-07	3.16e-05	952.591	811.406	893.693	551.219	626.08	679.353	Lrrc8b	ENSMUSG00000070639	leucine rich repeat containing 8 family, member B [Source:MGI Symbol;Acc:MGI:2141353]
ENSMUST00000119133	680.261	0.47801	0.0923666	5.17514	2.28e-07	3.69e-05	800.716	827.725	745.189	616.87	555.225	535.839	1700064H15Rik	ENSMUSG00000082766	RIKEN cDNA 1700064H15 gene [Source:MGI Symbol;Acc:MGI:1920674]
ENSMUST00000132296	210.079	-0.667878	0.130849	-5.10418	3.32e-07	5.03e-05	159.963	176.787	150.283	248.978	267.159	257.305	Gm11583	ENSMUSG00000084936	predicted gene 11583 [Source:MGI Symbol;Acc:MGI:3705153]
ENSMUST00000061334	1835.18	-0.422181	0.0831537	-5.07712	3.83e-07	5.43e-05	1417.2	1657.26	1629.1	2204.88	2138.43	1964.18	Mars2	ENSMUSG00000046994	methionine-tRNA synthetase 2 (mitochondrial) [Source:MGI Symbol;Acc:MGI:2444136]
ENSMUST00000142323	400.064	0.558429	0.111957	4.98786	6.11e-07	7.7e-05	504.154	457.832	465.076	372.847	306.651	293.82	4930417H01Rik	ENSMUSG00000087017	RIKEN cDNA 4930417H01 gene [Source:MGI Symbol;Acc:MGI:3041209]
ENSMUST00000211380	133.106	0.827255	0.165648	4.99404	5.91e-07	7.7e-05	161.761	155.028	194.745	97.8569	84.7938	104.45	Gm11175	ENSMUSG00000080058	predicted gene 11175 [Source:MGI Symbol;Acc:MGI:3809055]
ENSMUST00000100399	1511.39	0.363186	0.0733638	4.95048	7.4e-07	8.84e-05	1718.26	1750.64	1631.77	1343.98	1334.63	1289.07	Xrcc6	ENSMUSG00000022471	X-ray repair complementing defective repair in Chinese hamster cells 6 [Source:MGI Symbol;Acc:MGI:95606]
ENSMUST00000110408	667.369	0.527067	0.1084	4.86226	1.16e-06	0.000131664	909.455	753.384	702.505	559.89	491.339	587.64	Ropn1l	ENSMUSG00000022236	ropporin 1-like [Source:MGI Symbol;Acc:MGI:2182357]
ENSMUST00000000127	91.1295	0.936894	0.193195	4.84947	1.24e-06	0.000133752	131.206	122.391	106.71	53.2639	62.7242	70.4828	Wnt3	ENSMUSG00000000125	wingless-type MMTV integration site family, member 3 [Source:MGI Symbol;Acc:MGI:98955]
ENSMUST00000095267	159.519	0.767897	0.160855	4.77384	1.81e-06	0.000186413	206.694	195.825	201.859	130.063	85.9553	136.72	Jund	ENSMUSG00000071076	jun D proto-oncogene [Source:MGI Symbol;Acc:MGI:96648]
ENSMUST00000054636	87.1728	0.976877	0.205999	4.74215	2.11e-06	0.000208614	130.307	89.7533	127.162	50.7865	63.8857	61.1417	Bag5	ENSMUSG00000049792	BCL2-associated athanogene 5 [Source:MGI Symbol;Acc:MGI:1917619]
ENSMUST00000031719	267.117	0.600183	0.128652	4.66515	3.08e-06	0.000291554	370.252	286.485	308.569	206.862	224.181	206.353	Fscn3	ENSMUSG00000029707	fascin actin-bundling protein 3 [Source:MGI Symbol;Acc:MGI:1890386]
ENSMUST00000061455	985.407	0.450084	0.0971423	4.63324	3.6e-06	0.000326725	1218.6	1077.04	1122.23	729.592	822.384	942.602	Tent5c	ENSMUSG00000044468	terminal nucleotidyltransferase 5C [Source:MGI Symbol;Acc:MGI:1921895]
ENSMUST00000051297	810.552	0.391244	0.0850671	4.59924	4.24e-06	0.000370047	894.177	973.687	891.914	719.682	671.381	712.471	Tnp2	ENSMUSG00000043050	transition protein 2 [Source:MGI Symbol;Acc:MGI:98785]
ENSMUST00000008573	148.143	0.718373	0.156804	4.58135	4.62e-06	0.000388239	195.012	178.6	180.517	116.437	91.7631	126.529	Herpud2	ENSMUSG00000008429	HERPUD family member 2 [Source:MGI Symbol;Acc:MGI:1915393]
ENSMUST00000210714	229.317	0.594411	0.129972	4.57336	4.8e-06	0.000388934	263.311	280.139	286.337	162.269	180.042	203.806	Gm39566	ENSMUSG00000109737	predicted gene, 39566 [Source:MGI Symbol;Acc:MGI:5622451]
ENSMUST00000061047	780.312	0.472565	0.10397	4.5452	5.49e-06	0.000429409	1060.43	796.9	864.348	634.212	655.119	670.861	Phlpp1	ENSMUSG00000044340	PH domain and leucine rich repeat protein phosphatase 1 [Source:MGI Symbol;Acc:MGI:2138327]
ENSMUST00000046404	234.867	0.622305	0.137384	4.52968	5.91e-06	0.000443289	318.129	270.166	268.553	159.792	177.718	214.845	Ubr7	ENSMUSG00000041712	ubiquitin protein ligase E3 component n-recognin 7 (putative) [Source:MGI Symbol;Acc:MGI:1913872]
ENSMUST00000087155	397.365	0.483503	0.106865	4.52441	6.06e-06	0.000443289	498.762	461.459	430.395	309.674	348.468	335.43	Frat1	ENSMUSG00000067199	frequently rearranged in advanced T cell lymphomas [Source:MGI Symbol;Acc:MGI:109450]
ENSMUST00000045771	317.05	0.512624	0.114206	4.48859	7.17e-06	0.000508368	350.482	372.612	396.604	240.307	267.159	275.138	Spem1	ENSMUSG00000041165	sperm maturation 1 [Source:MGI Symbol;Acc:MGI:1921538]
ENSMUST00000124853	770.425	0.393875	0.0879284	4.4795	7.48e-06	0.00051443	855.535	913.852	852.788	702.34	680.673	617.362	Gm15856	ENSMUSG00000086527	predicted gene 15856 [Source:MGI Symbol;Acc:MGI:3801888]
ENSMUST00000155691	123.651	0.74139	0.165974	4.46691	7.94e-06	0.000529588	155.47	161.375	147.615	102.812	77.8244	96.8077	4933421O10Rik	ENSMUSG00000085037	RIKEN cDNA 4933421O10 gene [Source:MGI Symbol;Acc:MGI:1918323]
ENSMUST00000062684	114.684	0.817895	0.18489	4.42369	9.7e-06	0.000629013	179.734	132.363	128.052	80.5152	73.1782	94.2602	Tmem64	ENSMUSG00000043252	transmembrane protein 64 [Source:MGI Symbol;Acc:MGI:2140359]
ENSMUST00000203703	2048.26	0.35094	0.0794509	4.41707	1e-05	0.000630574	2325.76	2419.71	2140.42	1818.4	1907.28	1678	1700101I11Rik	ENSMUSG00000097675	RIKEN cDNA 1700101I11 gene [Source:MGI Symbol;Acc:MGI:1915180]
ENSMUST00000031900	235.517	0.623816	0.141722	4.40168	1.07e-05	0.000658736	336.103	255.661	266.774	157.314	195.142	202.107	Llcfc1	ENSMUSG00000029867	LLLL and CFNLAS motif containing 1 [Source:MGI Symbol;Acc:MGI:1923856]
ENSMUST00000052140	863.164	0.355089	0.0814205	4.36118	1.29e-05	0.000740975	995.727	942.863	969.279	749.411	738.751	782.954	Haspin	ENSMUSG00000050107	histone H3 associated protein kinase [Source:MGI Symbol;Acc:MGI:1194498]
ENSMUST00000056589	159.514	0.721433	0.165313	4.36404	1.28e-05	0.000740975	231.857	183.133	183.185	97.8569	114.994	146.061	Selenov	ENSMUSG00000046750	selenoprotein V [Source:MGI Symbol;Acc:MGI:3608324]
ENSMUST00000084949	109.559	0.84055	0.192829	4.35905	1.31e-05	0.000740975	161.761	112.418	149.393	63.1735	75.5013	95.1094	Impad1	ENSMUSG00000066324	inositol monophosphatase domain containing 1 [Source:MGI Symbol;Acc:MGI:1915720]
ENSMUST00000028918	149.612	0.657056	0.152094	4.32007	1.56e-05	0.000860488	176.139	175.88	198.302	113.96	106.863	126.529	Scp2d1	ENSMUSG00000027431	SCP2 sterol-binding domain containing 1 [Source:MGI Symbol;Acc:MGI:1913578]
ENSMUST00000141199	2169.26	0.38645	0.0895504	4.31545	1.59e-05	0.000860488	2200.84	2793.23	2378.73	1967.05	1867.79	1807.93	Gm16325	ENSMUSG00000085810	predicted gene 16325 [Source:MGI Symbol;Acc:MGI:3826549]
ENSMUST00000165147	512.567	-0.447256	0.104285	-4.28876	1.8e-05	0.000948079	407.098	466.898	425.06	624.303	627.242	524.8	Muc5b	ENSMUSG00000066108	mucin 5, subtype B, tracheobronchial [Source:MGI Symbol;Acc:MGI:1921430]
ENSMUST00000045296	215.054	0.610294	0.142623	4.27908	1.88e-05	0.000967772	223.769	262.007	295.23	146.166	178.88	184.274	Siah1a	ENSMUSG00000036840	siah E3 ubiquitin protein ligase 1A [Source:MGI Symbol;Acc:MGI:108064]
ENSMUST00000082237	73.7884	0.908785	0.21314	4.2638	2.01e-05	0.00101337	88.9684	91.5665	109.377	49.5478	42.9777	60.2925	Mex3b	ENSMUSG00000057706	mex3 RNA binding family member B [Source:MGI Symbol;Acc:MGI:1918252]
ENSMUST00000102500	606.644	0.399537	0.0945488	4.22573	2.38e-05	0.00117481	714.443	727.092	629.587	501.672	535.479	531.593	Gemin4	ENSMUSG00000049396	gem nuclear organelle associated protein 4 [Source:MGI Symbol;Acc:MGI:2449313]
ENSMUST00000020217	1514.89	0.406339	0.0970435	4.18718	2.82e-05	0.00136351	1833.29	1470.5	1878.98	1211.44	1293.98	1401.16	Nudt4	ENSMUSG00000020029	nudix (nucleoside diphosphate linked moiety X)-type motif 4 [Source:MGI Symbol;Acc:MGI:1918457]
ENSMUST00000099400	1190.32	0.375381	0.0902117	4.16111	3.17e-05	0.00149709	1399.23	1218.47	1418.35	951.318	1026.82	1127.73	Papolb	ENSMUSG00000074817	poly (A) polymerase beta (testis specific) [Source:MGI Symbol;Acc:MGI:1932115]
ENSMUST00000031852	400.646	0.515473	0.12541	4.11029	3.95e-05	0.00182986	416.983	436.981	562.004	328.254	296.197	363.454	4921507P07Rik	ENSMUSG00000029828	RIKEN cDNA 4921507P07 gene [Source:MGI Symbol;Acc:MGI:1918071]
ENSMUST00000062182	212.828	0.605869	0.149888	4.04214	5.3e-05	0.00240354	273.196	212.144	287.227	161.03	146.356	197.012	Gm4787	ENSMUSG00000072974	predicted gene 4787 [Source:MGI Symbol;Acc:MGI:3646380]
ENSMUST00000099525	809.209	-0.397681	0.0985288	-4.03619	5.43e-05	0.00241698	622.779	805.06	666.935	955.034	900.208	905.237	Ranbp6	ENSMUSG00000074909	RAN binding protein 6 [Source:MGI Symbol;Acc:MGI:2683212]
ENSMUST00000119972	717.891	0.394171	0.0977818	4.03113	5.55e-05	0.00242213	840.257	741.598	866.126	551.219	655.119	653.028	Dnajb3	ENSMUSG00000081984	DnaJ heat shock protein family (Hsp40) member B3 [Source:MGI Symbol;Acc:MGI:1306822]
ENSMUST00000102648	344.041	0.514437	0.127775	4.02612	5.67e-05	0.00242762	487.978	349.947	377.041	274.99	278.774	295.518	Oxct2b	ENSMUSG00000076438	3-oxoacid CoA transferase 2B [Source:MGI Symbol;Acc:MGI:2664115]
ENSMUST00000062439	165.233	0.60145	0.149994	4.00982	6.08e-05	0.00253878	179.734	197.639	221.422	115.199	134.741	142.664	Ccdc54	ENSMUSG00000050685	coiled-coil domain containing 54 [Source:MGI Symbol;Acc:MGI:1916589]
ENSMUST00000203370	870.175	-0.341555	0.0852433	-4.00683	6.15e-05	0.00253878	736.011	816.845	749.635	941.409	1030.3	946.848	Gm18609	ENSMUSG00000107810	predicted gene, 18609 [Source:MGI Symbol;Acc:MGI:5010794]
ENSMUST00000148892	540.49	0.403928	0.103069	3.91899	8.89e-05	0.00360289	553.581	689.922	604.688	443.453	468.108	483.189	BB031773	ENSMUSG00000085041	expressed sequence BB031773 [Source:MGI Symbol;Acc:MGI:2140631]
ENSMUST00000185768	2027.84	0.553449	0.142729	3.87763	0.000105479	0.00419881	2139.74	2828.59	2267.58	1788.68	1520.48	1621.95	1700027A15Rik	ENSMUSG00000101968	RIKEN cDNA 1700027A15 gene [Source:MGI Symbol;Acc:MGI:1916699]
ENSMUST00000100757	236.249	0.521403	0.136134	3.83006	0.000128111	0.00501179	316.332	252.941	266.774	167.224	217.211	197.012	Adam1a	ENSMUSG00000072647	a disintegrin and metallopeptidase domain 1a [Source:MGI Symbol;Acc:MGI:2429504]
ENSMUST00000183707	248.057	-0.488334	0.128291	-3.80646	0.000140969	0.00542132	185.126	224.836	208.084	308.435	302.005	259.852	1500004A13Rik	ENSMUSG00000098912	RIKEN cDNA 1500004A13 gene [Source:MGI Symbol;Acc:MGI:2442808]
ENSMUST00000179536	73.1334	-0.78827	0.207853	-3.79245	0.000149169	0.00554858	58.4136	56.2091	46.2408	84.2313	104.54	89.165	Gm21839	ENSMUSG00000094372	predicted gene, 21839 [Source:MGI Symbol;Acc:MGI:5434003]
ENSMUST00000235890	928.982	-0.346744	0.0914294	-3.79248	0.000149151	0.00554858	741.403	914.758	796.765	1086.34	1019.85	1014.78	Gm9937	ENSMUSG00000118119	predicted gene 9937 [Source:MGI Symbol;Acc:MGI:3642051]
ENSMUST00000079597	183.121	0.597663	0.157871	3.78576	0.000153239	0.00560805	232.756	189.479	241.875	128.824	126.61	179.179	Paqr9	ENSMUSG00000064225	progestin and adipoQ receptor family member IX [Source:MGI Symbol;Acc:MGI:1922802]
ENSMUST00000044711	136.269	-0.581696	0.156599	-3.71456	0.000203558	0.00707326	98.8538	120.578	108.488	151.121	169.588	168.989	Snx22	ENSMUSG00000039452	sorting nexin 22 [Source:MGI Symbol;Acc:MGI:2685966]
ENSMUST00000050373	696.208	0.409542	0.110333	3.71186	0.000205745	0.00707326	944.503	746.131	691.834	587.142	631.888	575.751	Tssk6	ENSMUSG00000047654	testis-specific serine kinase 6 [Source:MGI Symbol;Acc:MGI:2148775]
ENSMUST00000108504	124.681	0.634289	0.170639	3.71714	0.000201494	0.00707326	142.889	134.177	177.849	89.1861	108.025	95.9585	Fbxo39	ENSMUSG00000070388	F-box protein 39 [Source:MGI Symbol;Acc:MGI:3505735]
ENSMUST00000208216	308.413	0.437315	0.11764	3.71741	0.000201279	0.00707326	385.53	316.403	362.813	248.978	271.805	264.947	Dcst2	ENSMUSG00000109293	DC-STAMP domain containing 2 [Source:MGI Symbol;Acc:MGI:2685606]
ENSMUST00000174914	301.843	0.44886	0.121158	3.70476	0.00021159	0.00716565	324.42	353.574	367.259	225.443	291.551	248.813	Gm25238	ENSMUSG00000092655	predicted gene, 25238 [Source:MGI Symbol;Acc:MGI:5455015]
ENSMUST00000047864	2450.67	0.271878	0.0738858	3.6797	0.000233509	0.00779164	2889.23	2557.52	2595.71	2213.55	2241.81	2206.2	Eef2	ENSMUSG00000034994	eukaryotic translation elongation factor 2 [Source:MGI Symbol;Acc:MGI:95288]
ENSMUST00000099153	829.854	-0.326268	0.0887923	-3.67451	0.000238308	0.00783653	670.408	746.131	791.43	945.125	942.024	884.007	Ttc14	ENSMUSG00000027677	tetratricopeptide repeat domain 14 [Source:MGI Symbol;Acc:MGI:1914370]
ENSMUST00000103076	186.602	0.499838	0.136473	3.66253	0.00024974	0.00809515	223.769	208.518	223.201	147.405	167.264	149.458	Spata32	ENSMUSG00000044787	spermatogenesis associated 32 [Source:MGI Symbol;Acc:MGI:3045340]
ENSMUST00000033917	768.52	0.351073	0.0961332	3.65194	0.000260267	0.00831753	857.332	807.779	923.038	623.064	645.827	754.081	Spata4	ENSMUSG00000031518	spermatogenesis associated 4 [Source:MGI Symbol;Acc:MGI:1916531]
ENSMUST00000060722	69.5537	0.794144	0.217979	3.64321	0.000269254	0.00848525	95.2591	83.4071	87.1462	37.1609	55.7548	58.5942	Cxxc5	ENSMUSG00000046668	CXXC finger 5 [Source:MGI Symbol;Acc:MGI:1914643]
ENSMUST00000149237	143.095	0.562889	0.154989	3.6318	0.000281451	0.00874811	165.355	188.573	157.397	123.87	113.833	109.546	Gldnos	ENSMUSG00000074343	gliomedin, opposite strand [Source:MGI Symbol;Acc:MGI:1920817]
ENSMUST00000063219	1100.89	0.344126	0.0950095	3.62201	0.000292319	0.0089298	1277.01	1138.69	1283.18	876.996	928.085	1101.4	Pabpc2	ENSMUSG00000051732	poly(A) binding protein, cytoplasmic 2 [Source:MGI Symbol;Acc:MGI:1349723]
ENSMUST00000181325	384.493	-0.373145	0.103093	-3.6195	0.000295167	0.0089298	328.914	344.508	330.8	438.498	450.685	413.556	E530011L22Rik	ENSMUSG00000097820	RIKEN cDNA E530011L22 gene [Source:MGI Symbol;Acc:MGI:2443770]
ENSMUST00000134552	953.803	-0.31961	0.0885868	-3.60788	0.000308715	0.00921677	827.676	910.225	805.658	1085.1	1124.39	969.776	Gm15751	ENSMUSG00000086753	predicted gene 15751 [Source:MGI Symbol;Acc:MGI:3783193]
ENSMUST00000180068	326.451	0.448983	0.124618	3.60286	0.000314735	0.00927446	428.666	382.585	318.35	276.229	293.874	259.003	Yjefn3	ENSMUSG00000048967	YjeF N-terminal domain containing 3 [Source:MGI Symbol;Acc:MGI:2681845]
ENSMUST00000071308	141.769	0.546238	0.152159	3.58992	0.000330774	0.00962212	165.355	174.974	165.4	110.244	111.51	123.133	AF366264	ENSMUSG00000057116	cDNA sequence AF366264 [Source:MGI Symbol;Acc:MGI:2667157]
ENSMUST00000060703	496.975	0.403431	0.112524	3.58529	0.000336707	0.00967072	654.232	556.652	487.307	407.531	450.685	425.445	Ccer1	ENSMUSG00000047025	coiled-coil glutamate-rich protein 1 [Source:MGI Symbol;Acc:MGI:1913966]
ENSMUST00000032441	228.737	0.518186	0.14471	3.58086	0.00034247	0.00971332	327.116	251.128	230.315	196.953	170.749	196.163	Ccdc91	ENSMUSG00000030301	coiled-coil domain containing 91 [Source:MGI Symbol;Acc:MGI:1914265]
ENSMUST00000110551	2137.36	0.315707	0.0883415	3.57371	0.000351961	0.00985925	2537.85	2196.69	2380.51	1773.81	1800.42	2134.87	Sord	ENSMUSG00000027227	sorbitol dehydrogenase [Source:MGI Symbol;Acc:MGI:98266]
ENSMUST00000047362	325.881	-0.393566	0.110336	-3.56696	0.00036114	0.00988323	265.108	291.018	288.116	390.189	365.891	354.962	Rccd1	ENSMUSG00000038930	RCC1 domain containing 1 [Source:MGI Symbol;Acc:MGI:2444156]
ENSMUST00000120679	80.1726	0.745316	0.208966	3.56668	0.000361528	0.00988323	92.5631	114.231	93.3709	76.7991	52.2701	51.8006	Ccnc	ENSMUSG00000028252	cyclin C [Source:MGI Symbol;Acc:MGI:1858199]
ENSMUST00000052211	1200.22	0.599678	0.171188	3.50304	0.000459979	0.0122787	1778.47	1319.1	1241.39	900.532	960.609	1001.2	Znrf4	ENSMUSG00000044526	zinc and ring finger 4 [Source:MGI Symbol;Acc:MGI:1341258]
ENSMUST00000106268	197.622	0.518455	0.147893	3.50561	0.000455558	0.0122787	237.249	222.117	241.875	141.211	142.872	200.409	Tmco2	ENSMUSG00000078577	transmembrane and coiled-coil domains 2 [Source:MGI Symbol;Acc:MGI:1916719]
ENSMUST00000004173	3396.75	0.276754	0.0791645	3.49593	0.000472405	0.0124638	3866.08	3956.4	3341.79	3038.52	3157.12	3020.57	Cdip1	ENSMUSG00000004071	cell death inducing Trp53 target 1 [Source:MGI Symbol;Acc:MGI:1913876]
ENSMUST00000208498	436.046	-0.360295	0.103248	-3.48959	0.000483758	0.0126166	394.516	399.81	350.363	525.207	475.078	471.301	9330162G02Rik	ENSMUSG00000109536	RIKEN cDNA 9330162G02 gene [Source:MGI Symbol;Acc:MGI:2442217]
ENSMUST00000160220	208.365	-0.474291	0.136046	-3.48625	0.000489837	0.01263	162.659	194.919	164.511	260.126	249.735	218.242	Atxn2	ENSMUSG00000042605	ataxin 2 [Source:MGI Symbol;Acc:MGI:1277223]
ENSMUST00000222307	262.816	-0.429419	0.123516	-3.47663	0.000507749	0.0129447	230.958	226.65	213.419	289.855	339.175	276.836	Gm48009	ENSMUSG00000113782	predicted gene, 48009 [Source:MGI Symbol;Acc:MGI:6097315]
ENSMUST00000074515	488.706	-0.341955	0.0984643	-3.47288	0.000514902	0.0129812	394.516	447.86	449.959	566.084	544.771	529.046	Rffl	ENSMUSG00000020696	ring finger and FYVE like domain containing protein [Source:MGI Symbol;Acc:MGI:1914588]
ENSMUST00000127608	221.102	-0.459624	0.132466	-3.46975	0.000520935	0.012989	192.316	188.573	176.071	287.377	255.543	226.734	Gpn3	ENSMUSG00000029464	GPN-loop GTPase 3 [Source:MGI Symbol;Acc:MGI:1289326]
ENSMUST00000053743	87.3918	0.661161	0.192446	3.43556	0.000591323	0.0145838	102.448	101.539	118.27	59.4574	66.2088	76.4272	Ubqln5	ENSMUSG00000055643	ubiquilin 5 [Source:MGI Symbol;Acc:MGI:1918230]
ENSMUST00000029256	141.281	0.528863	0.155092	3.40998	0.000649668	0.0158505	157.267	174.974	167.178	128.824	114.994	104.45	Sec62	ENSMUSG00000027706	SEC62 homolog (S. cerevisiae) [Source:MGI Symbol;Acc:MGI:1916526]
ENSMUST00000043966	562.887	-0.311843	0.0917462	-3.39897	0.000676395	0.016327	483.485	525.827	497.089	646.599	608.657	615.663	Mrpl47	ENSMUSG00000037531	mitochondrial ribosomal protein L47 [Source:MGI Symbol;Acc:MGI:1921850]
ENSMUST00000212436	1357.34	0.267543	0.0790442	3.38473	0.000712493	0.0170173	1559.19	1469.6	1421.02	1262.23	1152.27	1279.73	Iqcn	ENSMUSG00000110622	IQ motif containing N [Source:MGI Symbol;Acc:MGI:3708784]
ENSMUST00000021822	218.201	-0.425531	0.126328	-3.36846	0.000755898	0.017866	196.809	177.693	184.074	251.455	252.058	247.114	Ogn	ENSMUSG00000021390	osteoglycin [Source:MGI Symbol;Acc:MGI:109278]
ENSMUST00000035099	1133.31	-0.271572	0.0807142	-3.36462	0.000766501	0.0179298	974.159	1050.75	1053.76	1293.2	1263.78	1164.24	Gorasp1	ENSMUSG00000032513	golgi reassembly stacking protein 1 [Source:MGI Symbol;Acc:MGI:1921748]
ENSMUST00000022537	72.1949	0.750392	0.223288	3.36065	0.000777603	0.0180039	107.84	78.8741	83.5892	58.2187	63.8857	40.7612	Prss52	ENSMUSG00000021966	protease, serine 52 [Source:MGI Symbol;Acc:MGI:1920632]
ENSMUST00000132670	125.078	-0.563856	0.168586	-3.34462	0.000823958	0.0188845	88.9684	102.446	110.267	157.314	164.941	126.529	Scube3	ENSMUSG00000038677	signal peptide, CUB domain, EGF-like 3 [Source:MGI Symbol;Acc:MGI:3045253]
ENSMUST00000069649	100.137	0.6957	0.208381	3.33859	0.000842048	0.0191061	159.963	99.7259	110.267	90.4248	80.1476	60.2925	Abhd16b	ENSMUSG00000055882	abhydrolase domain containing 16B [Source:MGI Symbol;Acc:MGI:3607711]
ENSMUST00000095107	259.069	0.449525	0.134834	3.33391	0.000856355	0.0192383	295.663	262.914	340.581	187.043	225.342	242.869	Ccin	ENSMUSG00000070999	calicin [Source:MGI Symbol;Acc:MGI:3045316]
ENSMUST00000033585	859.738	0.338657	0.101838	3.32546	0.000882736	0.0195423	1031.67	820.472	1030.64	708.534	743.398	823.715	Pgk2	ENSMUSG00000031233	phosphoglycerate kinase 2 [Source:MGI Symbol;Acc:MGI:97563]
ENSMUST00000081966	2382.31	0.305344	0.0918584	3.32408	0.000887113	0.0195423	3010.55	2452.35	2440.09	1995.54	2105.91	2289.42	Odf1	ENSMUSG00000061923	outer dense fiber of sperm tails 1 [Source:MGI Symbol;Acc:MGI:97424]
ENSMUST00000024042	264.251	0.403396	0.121759	3.31305	0.000922833	0.0201337	325.319	296.458	281.891	209.34	238.12	234.377	Creld2	ENSMUSG00000023272	cysteine-rich with EGF-like domains 2 [Source:MGI Symbol;Acc:MGI:1923987]
ENSMUST00000193614	70.6965	0.773892	0.233881	3.30892	0.000936563	0.0202387	105.144	100.632	61.358	50.7865	60.4011	45.8563	E330011M16Rik	ENSMUSG00000103030	RIKEN cDNA E330011M16 gene [Source:MGI Symbol;Acc:MGI:3704186]
ENSMUST00000007248	1101.5	0.283883	0.0862023	3.29322	0.000990464	0.0209668	1277.91	1101.52	1251.17	936.454	996.617	1045.35	Hspa1l	ENSMUSG00000007033	heat shock protein 1-like [Source:MGI Symbol;Acc:MGI:96231]
ENSMUST00000033176	382.934	-0.347154	0.105566	-3.2885	0.00100722	0.0209668	324.42	367.172	319.24	436.021	432.1	418.651	Uqcrc2	ENSMUSG00000030884	ubiquinol cytochrome c reductase core protein 2 [Source:MGI Symbol;Acc:MGI:1914253]
ENSMUST00000148880	70.2667	0.713706	0.216865	3.29101	0.000998274	0.0209668	93.4618	77.0609	90.7032	48.3091	66.2088	45.8563	Rbbp6	ENSMUSG00000030779	retinoblastoma binding protein 6, ubiquitin ligase [Source:MGI Symbol;Acc:MGI:894835]
ENSMUST00000167004	218.682	0.453011	0.137559	3.29322	0.000990462	0.0209668	275.892	239.342	245.432	163.508	173.072	214.845	Gpat4	ENSMUSG00000031545	glycerol-3-phosphate acyltransferase 4 [Source:MGI Symbol;Acc:MGI:2142716]
ENSMUST00000036226	724.617	0.347116	0.105651	3.28548	0.00101807	0.021	910.353	737.971	788.762	557.413	645.827	707.376	Fem1c	ENSMUSG00000033319	fem-1 homolog c (C.elegans) [Source:MGI Symbol;Acc:MGI:2444737]
ENSMUST00000168747	297.107	0.403453	0.123021	3.27954	0.00103977	0.0212544	365.759	295.551	354.809	230.397	269.482	266.646	Atp10a	ENSMUSG00000025324	ATPase, class V, type 10A [Source:MGI Symbol;Acc:MGI:1330809]
ENSMUST00000133534	347.389	0.354136	0.108398	3.267	0.00108692	0.0218251	383.732	417.942	368.148	302.242	303.167	309.105	Gm14091	ENSMUSG00000086421	predicted gene 14091 [Source:MGI Symbol;Acc:MGI:3650488]
ENSMUST00000141511	233.74	-0.444625	0.136043	-3.26826	0.0010821	0.0218251	173.443	232.996	188.52	268.797	247.412	291.272	Gm13999	ENSMUSG00000087458	predicted gene 13999 [Source:MGI Symbol;Acc:MGI:3651905]
ENSMUST00000038928	731.95	0.309091	0.0948005	3.26044	0.00111239	0.0219479	900.468	749.757	781.648	626.78	643.504	689.543	Hils1	ENSMUSG00000038994	histone H1-like protein in spermatids 1 [Source:MGI Symbol;Acc:MGI:2136691]
ENSMUST00000180691	120.375	-0.544797	0.16706	-3.26109	0.00110984	0.0219479	98.8538	90.6599	103.153	161.03	142.872	125.68	Gm26852	ENSMUSG00000097231	predicted gene, 26852 [Source:MGI Symbol;Acc:MGI:5477346]
ENSMUST00000050658	790.898	0.309609	0.0954744	3.24285	0.00118339	0.023121	838.46	833.164	957.719	654.031	684.158	777.859	Spz1	ENSMUSG00000046957	spermatogenic leucine zipper 1 [Source:MGI Symbol;Acc:MGI:1930801]
ENSMUST00000237254	65.2466	-0.692623	0.213724	-3.24073	0.00119222	0.023121	51.2242	46.2365	52.4656	76.7991	78.986	85.7683	Gm50254	ENSMUSG00000118007	predicted gene, 50254 [Source:MGI Symbol;Acc:MGI:6303073]
ENSMUST00000201035	99.4277	0.573671	0.17718	3.23779	0.00120458	0.0231627	122.219	120.578	113.824	85.47	75.5013	78.9747	4933425D22Rik	ENSMUSG00000107164	RIKEN cDNA 4933425D22 gene [Source:MGI Symbol;Acc:MGI:1914009]
ENSMUST00000059657	543.585	0.342759	0.106121	3.22989	0.00123838	0.0234203	667.712	545.772	612.691	448.408	455.331	531.593	Gk2	ENSMUSG00000050553	glycerol kinase 2 [Source:MGI Symbol;Acc:MGI:1329027]
ENSMUST00000154672	182.681	0.511807	0.158462	3.22983	0.00123863	0.0234203	257.919	198.545	188.52	122.631	173.072	155.402	Clip1	ENSMUSG00000049550	CAP-GLY domain containing linker protein 1 [Source:MGI Symbol;Acc:MGI:1928401]
ENSMUST00000029955	633.933	0.297647	0.0925202	3.2171	0.00129492	0.0240958	712.646	666.35	720.29	566.084	528.509	609.719	1700009N14Rik	ENSMUSG00000028287	RIKEN cDNA 1700009N14 gene [Source:MGI Symbol;Acc:MGI:1922721]
ENSMUST00000102640	365.461	0.397671	0.123707	3.21461	0.00130621	0.0240958	482.586	392.557	373.484	276.229	320.59	347.319	Oxct2a	ENSMUSG00000076436	3-oxoacid CoA transferase 2A [Source:MGI Symbol;Acc:MGI:1891061]
ENSMUST00000175930	168.3	-0.503435	0.156496	-3.21693	0.00129571	0.0240958	135.699	158.655	121.827	222.965	206.757	163.894	Mettl23	ENSMUSG00000090266	methyltransferase like 23 [Source:MGI Symbol;Acc:MGI:1921569]
ENSMUST00000185085	139.077	0.503933	0.157803	3.19343	0.00140596	0.0255209	155.47	184.946	148.504	120.153	114.994	110.395	Gm27735	ENSMUSG00000099318	predicted gene, 27735 [Source:MGI Symbol;Acc:MGI:5531117]
ENSMUST00000192176	973.82	0.262713	0.0822453	3.19427	0.00140186	0.0255209	1082.9	1090.64	1011.07	933.976	882.785	841.548	Gm37376	ENSMUSG00000102349	predicted gene, 37376 [Source:MGI Symbol;Acc:MGI:5610604]
ENSMUST00000122447	305.355	0.390418	0.123242	3.16791	0.00153541	0.0272745	371.151	370.799	298.787	260.126	245.089	286.177	Gm12260	ENSMUSG00000080152	predicted gene 12260 [Source:MGI Symbol;Acc:MGI:3651326]
ENSMUST00000130916	513.92	-0.29414	0.0928421	-3.16817	0.00153401	0.0272745	457.423	450.58	477.525	562.368	559.871	575.751	Becn1	ENSMUSG00000035086	beclin 1, autophagy related [Source:MGI Symbol;Acc:MGI:1891828]
ENSMUST00000179343	65.5088	0.700137	0.221052	3.1673	0.00153862	0.0272745	79.083	77.0609	88.0354	50.7865	39.493	58.5942	Purb	ENSMUSG00000094483	purine rich element binding protein B [Source:MGI Symbol;Acc:MGI:1338779]
ENSMUST00000179318	91.889	-0.593876	0.187709	-3.1638	0.00155721	0.0273901	60.2109	77.0609	82.6999	104.05	112.671	114.641	Sh3gl3	ENSMUSG00000030638	SH3-domain GRB2-like 3 [Source:MGI Symbol;Acc:MGI:700011]
ENSMUST00000026573	161.731	-0.494194	0.156665	-3.15446	0.00160798	0.0280216	115.929	123.297	162.732	204.385	191.657	172.386	Lmntd2	ENSMUSG00000025500	lamin tail domain containing 2 [Source:MGI Symbol;Acc:MGI:1919250]
ENSMUST00000171723	584.867	0.312353	0.0990755	3.15268	0.00161782	0.0280216	594.021	689.922	658.043	573.516	499.47	494.229	Gm17202	ENSMUSG00000090558	predicted gene 17202 [Source:MGI Symbol;Acc:MGI:4938029]
ENSMUST00000020835	417.29	0.324669	0.103139	3.14787	0.00164463	0.0280251	488.877	474.151	429.506	379.041	354.275	377.89	Ppm1d	ENSMUSG00000020525	protein phosphatase 1D magnesium-dependent, delta isoform [Source:MGI Symbol;Acc:MGI:1858214]
ENSMUST00000164518	1347.17	0.246761	0.0784359	3.14602	0.00165507	0.0280251	1569.08	1418.83	1399.67	1211.44	1216.15	1267.84	4933411K16Rik	ENSMUSG00000090369	RIKEN cDNA 4933411K16 gene [Source:MGI Symbol;Acc:MGI:1914015]
ENSMUST00000196885	119.161	-0.516338	0.164017	-3.14808	0.00164346	0.0280251	103.347	91.5665	99.5956	144.927	127.771	147.759	Gm32102	ENSMUSG00000106433	predicted gene, 32102 [Source:MGI Symbol;Acc:MGI:5591261]
ENSMUST00000064099	116.079	0.524279	0.166964	3.14007	0.00168906	0.0283888	135.699	135.083	140.501	82.9926	104.54	97.6569	Ppp6r1	ENSMUSG00000052296	protein phosphatase 6, regulatory subunit 1 [Source:MGI Symbol;Acc:MGI:2442163]
ENSMUST00000124108	109.052	-0.573029	0.183349	-3.12535	0.00177592	0.0291997	68.299	93.3797	100.485	137.495	141.71	112.942	Dnah2os	ENSMUSG00000086591	dynein, axonemal, heavy chain 2, opposite strand [Source:MGI Symbol;Acc:MGI:1924973]
ENSMUST00000180550	1186.92	-0.271594	0.0868888	-3.12576	0.00177345	0.0291997	1101.77	1157.73	967.5	1230.02	1369.48	1295.02	Gm26533	ENSMUSG00000097748	predicted gene, 26533 [Source:MGI Symbol;Acc:MGI:5477027]
ENSMUST00000181605	1193.65	-0.259086	0.0828389	-3.12759	0.00176248	0.0291997	1069.42	1132.34	1056.43	1293.2	1405.49	1205	9530082P21Rik	ENSMUSG00000097006	RIKEN cDNA 9530082P21 gene [Source:MGI Symbol;Acc:MGI:3603340]
ENSMUST00000063166	130.205	0.507884	0.16273	3.12102	0.00180229	0.0294201	161.761	130.55	166.289	110.244	104.54	107.847	Fam71b	ENSMUSG00000020401	family with sequence similarity 71, member B [Source:MGI Symbol;Acc:MGI:3650836]
ENSMUST00000058109	137.875	-0.496187	0.159575	-3.10943	0.0018745	0.0303803	98.8538	128.737	116.491	152.36	153.326	177.481	Mrps7	ENSMUSG00000046756	mitchondrial ribosomal protein S7 [Source:MGI Symbol;Acc:MGI:1354367]
ENSMUST00000181495	139.416	-0.488873	0.157385	-3.10623	0.00189489	0.030493	105.144	125.111	118.27	172.179	141.71	174.084	4732487G21Rik	ENSMUSG00000097488	RIKEN cDNA 4732487G21 gene [Source:MGI Symbol;Acc:MGI:2441820]
ENSMUST00000025264	157.784	-0.459315	0.148369	-3.09577	0.00196303	0.031367	127.611	144.149	128.052	169.701	174.234	202.957	Wdr33	ENSMUSG00000024400	WD repeat domain 33 [Source:MGI Symbol;Acc:MGI:1921570]
ENSMUST00000070353	148.262	-0.471582	0.152436	-3.09364	0.00197718	0.0313722	137.497	128.737	106.71	165.985	176.557	174.084	Slc24a5	ENSMUSG00000035183	solute carrier family 24, member 5 [Source:MGI Symbol;Acc:MGI:2677271]
ENSMUST00000049038	199.444	0.411471	0.133454	3.08325	0.00204756	0.0321767	221.972	246.595	215.198	163.508	171.911	177.481	Sox30	ENSMUSG00000040489	SRY (sex determining region Y)-box 30 [Source:MGI Symbol;Acc:MGI:1341157]
ENSMUST00000150953	70.7093	-0.65682	0.213116	-3.08199	0.00205624	0.0321767	45.8322	63.4619	55.1333	99.0956	76.6629	84.0699	D030055H07Rik	ENSMUSG00000086296	RIKEN cDNA D030055H07 gene [Source:MGI Symbol;Acc:MGI:3605036]
ENSMUST00000066193	739.582	0.344682	0.112047	3.07622	0.00209643	0.0325809	958.882	731.625	794.987	611.916	597.041	743.042	Gykl1	ENSMUSG00000053624	glycerol kinase-like 1 [Source:MGI Symbol;Acc:MGI:891990]
ENSMUST00000022196	134.288	0.488458	0.159012	3.07184	0.00212747	0.0328383	159.963	144.149	166.289	100.334	125.448	109.546	Ap3b1	ENSMUSG00000021686	adaptor-related protein complex 3, beta 1 subunit [Source:MGI Symbol;Acc:MGI:1333879]
ENSMUST00000062917	426.906	0.350314	0.114331	3.06402	0.00218384	0.0334806	470.005	429.728	537.994	354.267	350.791	418.651	Iqcf3	ENSMUSG00000118396	IQ motif containing F3 [Source:MGI Symbol;Acc:MGI:1915515]
ENSMUST00000021773	105.685	-0.537718	0.176181	-3.05208	0.00227262	0.0346079	84.4751	94.2863	79.143	127.586	138.225	110.395	Gpld1	ENSMUSG00000021340	glycosylphosphatidylinositol specific phospholipase D1 [Source:MGI Symbol;Acc:MGI:106604]
ENSMUST00000130184	597.386	-0.312272	0.102472	-3.04739	0.0023084	0.0348408	558.973	581.13	457.962	676.328	680.673	629.25	Gm16726	ENSMUSG00000086816	predicted gene, 16726 [Source:MGI Symbol;Acc:MGI:4439650]
ENSMUST00000174088	536.982	0.319179	0.104784	3.04606	0.00231862	0.0348408	642.55	540.333	608.245	449.646	449.523	531.593	Actl9	ENSMUSG00000092519	actin-like 9 [Source:MGI Symbol;Acc:MGI:1916731]
ENSMUST00000181587	1048.42	-0.245657	0.0809879	-3.03326	0.00241925	0.0361137	921.138	1031.71	924.817	1149.51	1144.14	1119.23	1810014B01Rik	ENSMUSG00000097412	RIKEN cDNA 1810014B01 gene [Source:MGI Symbol;Acc:MGI:1913513]
ENSMUST00000061866	169.621	0.469897	0.155215	3.02739	0.00246672	0.0365549	208.492	194.919	190.299	125.108	123.125	175.782	Dnajb8	ENSMUSG00000048206	DnaJ heat shock protein family (Hsp40) member B8 [Source:MGI Symbol;Acc:MGI:1922801]
ENSMUST00000085113	69.8203	0.656258	0.217039	3.02369	0.00249714	0.0365549	89.8671	97.0061	70.2505	49.5478	51.1086	61.1417	Iqcf5	ENSMUSG00000066382	IQ motif containing F5 [Source:MGI Symbol;Acc:MGI:1922720]
ENSMUST00000189704	458.583	0.371275	0.122748	3.02469	0.00248887	0.0365549	615.589	459.646	478.415	348.073	415.838	433.936	1700020D05Rik	ENSMUSG00000100937	RIKEN cDNA 1700020D05 gene [Source:MGI Symbol;Acc:MGI:1922805]
ENSMUST00000029535	111.554	0.533185	0.177147	3.00984	0.00261383	0.0380179	115.929	130.55	150.283	76.7991	96.4094	99.3553	Lelp1	ENSMUSG00000027927	late cornified envelope-like proline-rich 1 [Source:MGI Symbol;Acc:MGI:1916582]
ENSMUST00000029078	77.5952	0.598781	0.199131	3.00696	0.0026387	0.0381352	97.9551	87.0335	96.0386	58.2187	59.2395	67.0861	Car2	ENSMUSG00000027562	carbonic anhydrase 2 [Source:MGI Symbol;Acc:MGI:88269]
ENSMUST00000152247	123.253	0.502545	0.167252	3.00472	0.00265827	0.0381748	154.571	125.111	152.95	102.812	111.51	92.5618	Tnrc18	ENSMUSG00000039477	trinucleotide repeat containing 18 [Source:MGI Symbol;Acc:MGI:3648294]
ENSMUST00000066308	238.016	0.388422	0.129487	2.99971	0.00270234	0.0385636	280.385	250.221	281.002	194.475	189.334	232.678	Cfap58	ENSMUSG00000046585	cilia and flagella associated protein 58 [Source:MGI Symbol;Acc:MGI:2685815]
ENSMUST00000185324	200.541	-0.398135	0.132895	-2.99586	0.00273673	0.0388102	163.558	184.946	171.625	215.533	223.019	244.567	Gm16794	ENSMUSG00000097777	predicted gene, 16794 [Source:MGI Symbol;Acc:MGI:4439718]
ENSMUST00000172812	671.828	0.340593	0.114007	2.98747	0.00281294	0.0396432	806.108	646.405	802.99	557.413	528.509	689.543	Malat1	ENSMUSG00000092341	metastasis associated lung adenocarcinoma transcript 1 (non-coding RNA) [Source:MGI Symbol;Acc:MGI:1919539]
ENSMUST00000212460	256.137	-0.358508	0.120255	-2.98122	0.00287099	0.0402116	214.782	242.062	216.087	292.332	293.874	277.685	Gm45732	ENSMUSG00000110704	predicted gene 45732 [Source:MGI Symbol;Acc:MGI:5804847]
ENSMUST00000031982	111.143	-0.512552	0.173135	-2.96041	0.00307228	0.0420813	88.0697	97.9127	88.9247	112.721	151.003	128.228	Hpgds	ENSMUSG00000029919	hematopoietic prostaglandin D synthase [Source:MGI Symbol;Acc:MGI:1859384]
ENSMUST00000070659	135.591	0.519489	0.175315	2.96317	0.00304485	0.0420813	201.302	147.776	130.719	111.483	103.379	118.887	1700001K19Rik	ENSMUSG00000056508	RIKEN cDNA 1700001K19 gene [Source:MGI Symbol;Acc:MGI:1913573]
ENSMUST00000155671	613.696	-0.289049	0.0975377	-2.96346	0.00304204	0.0420813	555.379	601.982	498.867	673.85	714.359	637.742	Vps29	ENSMUSG00000029462	VPS29 retromer complex component [Source:MGI Symbol;Acc:MGI:1928344]
ENSMUST00000194607	328.023	-0.372555	0.125873	-2.95977	0.00307866	0.0420813	257.919	346.321	253.435	381.518	361.245	367.7	Gm37664	ENSMUSG00000103100	predicted gene, 37664 [Source:MGI Symbol;Acc:MGI:5610892]
ENSMUST00000204577	121.424	-0.54395	0.18431	-2.95128	0.00316464	0.0429975	93.4618	107.885	93.3709	164.746	163.78	105.3	Gm20560	ENSMUSG00000107546	predicted gene, 20560 [Source:MGI Symbol;Acc:MGI:5295667]
ENSMUST00000033001	141.066	0.490241	0.166323	2.94753	0.00320322	0.0432625	176.139	140.523	179.628	102.812	108.025	139.267	Dgat2	ENSMUSG00000030747	diacylglycerol O-acyltransferase 2 [Source:MGI Symbol;Acc:MGI:1915050]
ENSMUST00000034612	530.872	0.289759	0.0985328	2.94074	0.00327433	0.0437027	594.92	550.305	609.134	460.795	449.523	520.554	Ddx25	ENSMUSG00000032101	DEAD (Asp-Glu-Ala-Asp) box polypeptide 25 [Source:MGI Symbol;Acc:MGI:1353582]
ENSMUST00000180928	416.599	0.361773	0.122991	2.94147	0.00326663	0.0437027	514.04	442.42	446.402	366.654	428.615	301.463	E030037K01Rik	ENSMUSG00000097706	RIKEN cDNA E030037K01 gene [Source:MGI Symbol;Acc:MGI:3704310]
ENSMUST00000085111	175.651	0.449882	0.154062	2.92013	0.00349885	0.0464263	241.742	194.919	171.625	162.269	134.741	148.608	Iqcf4	ENSMUSG00000041009	IQ motif containing F4 [Source:MGI Symbol;Acc:MGI:1914570]
ENSMUST00000136880	136.525	0.476425	0.163284	2.91777	0.00352548	0.0465076	170.747	150.495	157.397	101.573	102.217	136.72	Gm11780	ENSMUSG00000085155	predicted gene 11780 [Source:MGI Symbol;Acc:MGI:3650485]
ENSMUST00000064853	332.548	-0.374428	0.12847	-2.91452	0.00356233	0.0467222	291.169	333.628	242.764	423.634	363.568	340.525	1700030K09Rik	ENSMUSG00000052794	RIKEN cDNA 1700030K09 gene [Source:MGI Symbol;Acc:MGI:1919504]
ENSMUST00000051614	198.359	0.385256	0.133123	2.89398	0.00380389	0.0496036	236.35	217.584	219.644	165.985	185.849	164.743	Adam24	ENSMUSG00000046723	a disintegrin and metallopeptidase domain 24 (testase 1) [Source:MGI Symbol;Acc:MGI:105984]
ENSMUST00000183323	341.182	-0.313923	0.10865	-2.88931	0.00386094	0.0500599	310.041	312.777	289.005	375.325	400.738	359.208	Gm29361	ENSMUSG00000099708	predicted gene 29361 [Source:MGI Symbol;Acc:MGI:5580067]
ENSMUST00000025048	320.094	0.33455	0.116253	2.87778	0.0040049	0.0513397	393.618	330.002	348.585	260.126	292.713	295.518	1700061G19Rik	ENSMUSG00000024209	RIKEN cDNA 1700061G19 gene [Source:MGI Symbol;Acc:MGI:1925875]
ENSMUST00000163061	404.938	-0.317256	0.110239	-2.87789	0.0040034	0.0513397	350.482	397.997	332.578	494.239	417	437.333	Kctd18	ENSMUSG00000054770	potassium channel tetramerisation domain containing 18 [Source:MGI Symbol;Acc:MGI:3603813]
ENSMUST00000161925	186.314	0.396683	0.137952	2.87553	0.00403354	0.0514164	197.708	215.771	220.533	174.656	161.457	147.759	Gm15996	ENSMUSG00000090026	predicted gene 15996 [Source:MGI Symbol;Acc:MGI:3802107]
ENSMUST00000025388	160.237	0.467354	0.162775	2.87116	0.00408963	0.0516315	230.958	155.935	171.625	126.347	134.741	141.815	Ftmt	ENSMUSG00000024510	ferritin mitochondrial [Source:MGI Symbol;Acc:MGI:1914884]
ENSMUST00000061019	739.55	0.284194	0.0989989	2.87068	0.00409593	0.0516315	792.628	791.461	856.345	593.335	643.504	760.026	Kif2b	ENSMUSG00000046755	kinesin family member 2B [Source:MGI Symbol;Acc:MGI:1920720]
ENSMUST00000029632	88.3282	-0.560372	0.195801	-2.86195	0.00421049	0.0527823	82.6777	73.4345	58.6903	106.528	90.6016	118.038	Lrat	ENSMUSG00000028003	lecithin-retinol acyltransferase (phosphatidylcholine-retinol-O-acyltransferase) [Source:MGI Symbol;Acc:MGI:1891259]
ENSMUST00000033178	124.885	-0.467973	0.164019	-2.85317	0.00432855	0.0539641	112.334	110.605	91.5924	156.076	130.095	148.608	Pdzd9	ENSMUSG00000030887	PDZ domain containing 9 [Source:MGI Symbol;Acc:MGI:1915233]
ENSMUST00000197455	846.335	0.280481	0.098561	2.84576	0.00443054	0.0549339	821.385	1067.07	896.361	760.559	779.406	753.232	Gm43412	ENSMUSG00000105107	predicted gene 43412 [Source:MGI Symbol;Acc:MGI:5663549]
ENSMUST00000115100	192.343	-0.38289	0.134669	-2.8432	0.00446635	0.0550769	176.139	170.441	153.84	231.636	211.404	210.599	Iqcg	ENSMUSG00000035578	IQ motif containing G [Source:MGI Symbol;Acc:MGI:1916957]
ENSMUST00000152014	103.249	-0.511498	0.180169	-2.83899	0.00452561	0.055506	83.5764	86.1269	84.4784	139.973	124.287	101.054	Gm15787	ENSMUSG00000086247	predicted gene 15787 [Source:MGI Symbol;Acc:MGI:3783229]
ENSMUST00000191455	337.141	-0.341255	0.120344	-2.83567	0.00457293	0.0557848	299.257	329.095	262.328	398.86	399.576	333.732	Gm16759	ENSMUSG00000086539	predicted gene, 16759 [Source:MGI Symbol;Acc:MGI:4439683]
ENSMUST00000037912	322.342	0.325338	0.114859	2.83251	0.00461847	0.0560391	390.023	323.656	362.813	273.752	285.743	298.066	Ssh2	ENSMUSG00000037926	slingshot protein phosphatase 2 [Source:MGI Symbol;Acc:MGI:2679255]
ENSMUST00000019276	148.316	0.489628	0.173764	2.81777	0.00483577	0.0582076	200.404	142.336	178.739	121.392	97.5709	149.458	BC005537	ENSMUSG00000019132	cDNA sequence BC005537 [Source:MGI Symbol;Acc:MGI:2441726]
ENSMUST00000063317	74.037	0.630512	0.224027	2.81445	0.00488614	0.0582076	94.3604	67.0883	109.377	47.0704	59.2395	67.0861	Adam6b	ENSMUSG00000051804	a disintegrin and metallopeptidase domain 6B [Source:MGI Symbol;Acc:MGI:2444636]
ENSMUST00000161023	326.852	-0.35897	0.127527	-2.81486	0.00487982	0.0582076	246.236	344.508	267.663	392.666	363.568	346.47	Slirp	ENSMUSG00000021040	SRA stem-loop interacting RNA binding protein [Source:MGI Symbol;Acc:MGI:1916394]
ENSMUST00000232692	830.086	0.308945	0.109806	2.81355	0.0048998	0.0582076	996.626	1002.7	754.97	817.539	713.197	695.487	A730006G06Rik	ENSMUSG00000117334	RIKEN cDNA A730006G06 gene [Source:MGI Symbol;Acc:MGI:2444422]
ENSMUST00000092956	86.2748	0.536918	0.191359	2.80581	0.00501897	0.0590053	98.8538	106.072	102.263	58.2187	76.6629	75.578	Ahnak	ENSMUSG00000069833	AHNAK nucleoprotein (desmoyokin) [Source:MGI Symbol;Acc:MGI:1316648]
ENSMUST00000099274	354.541	0.321407	0.114493	2.80722	0.00499711	0.0590053	439.45	349.947	393.047	312.151	303.167	329.486	Pdzd8	ENSMUSG00000074746	PDZ domain containing 8 [Source:MGI Symbol;Acc:MGI:2677270]
ENSMUST00000025218	201.677	0.403602	0.144343	2.79613	0.00517193	0.0601801	228.262	209.424	253.435	168.463	147.518	202.957	Etf1	ENSMUSG00000024360	eukaryotic translation termination factor 1 [Source:MGI Symbol;Acc:MGI:2385071]
ENSMUST00000173598	79.9691	-0.5798	0.207333	-2.79647	0.00516642	0.0601801	53.9202	83.4071	55.1333	99.0956	90.6016	97.6569	Chadl	ENSMUSG00000063765	chondroadherin-like [Source:MGI Symbol;Acc:MGI:3036284]
ENSMUST00000031388	99.5124	-0.518204	0.185861	-2.78813	0.00530137	0.0613715	69.1976	89.7533	87.1462	122.631	97.5709	130.775	Vps33a	ENSMUSG00000029434	VPS33A CORVET/HOPS core subunit [Source:MGI Symbol;Acc:MGI:1924823]
ENSMUST00000040434	95.5017	0.552233	0.198238	2.7857	0.00534115	0.0615181	143.787	93.3797	104.042	78.0378	69.6935	84.0699	Tbcc	ENSMUSG00000036430	tubulin-specific chaperone C [Source:MGI Symbol;Acc:MGI:1919976]
ENSMUST00000028683	77.0536	0.555182	0.199682	2.78033	0.00543035	0.0616073	82.6777	96.0995	96.0386	65.6509	61.5626	60.2925	Pdia3	ENSMUSG00000027248	protein disulfide isomerase associated 3 [Source:MGI Symbol;Acc:MGI:95834]
ENSMUST00000150375	159.028	0.421141	0.151397	2.78171	0.00540738	0.0616073	165.355	207.611	174.292	132.54	126.61	147.759	Gm13563	ENSMUSG00000085767	predicted gene 13563 [Source:MGI Symbol;Acc:MGI:3652052]
ENSMUST00000173980	87.3382	-0.544462	0.195621	-2.78325	0.00538181	0.0616073	70.0963	67.0883	76.4752	112.721	81.3091	116.339	Gm17344	ENSMUSG00000078143	predicted gene, 17344 [Source:MGI Symbol;Acc:MGI:4936978]
ENSMUST00000057254	469.095	0.284186	0.102617	2.76939	0.00561606	0.0628526	523.925	466.898	555.779	405.053	420.484	442.428	Ubqln3	ENSMUSG00000051618	ubiquilin 3 [Source:MGI Symbol;Acc:MGI:3045291]
ENSMUST00000188201	223.81	0.356334	0.128688	2.76898	0.00562321	0.0628526	234.553	275.606	244.543	189.52	193.98	204.655	Gm28265	ENSMUSG00000101588	predicted gene 28265 [Source:MGI Symbol;Acc:MGI:5578971]
ENSMUST00000220037	444.801	-0.322766	0.116507	-2.77035	0.0055996	0.0628526	366.658	460.552	357.477	485.569	545.933	452.619	Gm32872	ENSMUSG00000112793	predicted gene, 32872 [Source:MGI Symbol;Acc:MGI:5592031]
ENSMUST00000090680	311.227	0.359458	0.130002	2.76503	0.00569177	0.0629134	389.124	310.057	353.031	235.352	261.351	318.446	Ddx20	ENSMUSG00000027905	DEAD (Asp-Glu-Ala-Asp) box polypeptide 20 [Source:MGI Symbol;Acc:MGI:1858415]
ENSMUST00000115110	127.469	0.464575	0.168088	2.76388	0.00571184	0.0629134	153.673	151.402	140.501	92.9022	96.4094	129.926	Hyls1	ENSMUSG00000050555	HYLS1, centriolar and ciliogenesis associated [Source:MGI Symbol;Acc:MGI:1924082]
ENSMUST00000119282	482.231	-0.276045	0.0998304	-2.76514	0.00568992	0.0629134	406.199	456.926	444.623	517.775	566.841	501.022	Gm13961	ENSMUSG00000084094	predicted gene 13961 [Source:MGI Symbol;Acc:MGI:3650627]
ENSMUST00000021494	126.692	0.468515	0.169629	2.762	0.00574482	0.062971	145.585	130.55	166.289	86.7087	113.833	117.188	Ccdc175	ENSMUSG00000021086	coiled-coil domain containing 175 [Source:MGI Symbol;Acc:MGI:1921186]
ENSMUST00000029991	599.553	0.298624	0.109106	2.737	0.00620026	0.0673128	761.174	573.877	650.929	506.626	523.863	580.846	Ppp3r2	ENSMUSG00000028310	protein phosphatase 3, regulatory subunit B, alpha isoform (calcineurin B, type II) [Source:MGI Symbol;Acc:MGI:107171]
ENSMUST00000080492	101.975	0.483081	0.176475	2.73739	0.00619297	0.0673128	109.638	125.111	122.716	80.5152	81.3091	92.5618	Rpl36	ENSMUSG00000057863	ribosomal protein L36 [Source:MGI Symbol;Acc:MGI:1860603]
ENSMUST00000060041	232.097	0.340246	0.124769	2.727	0.00639135	0.0686789	277.689	245.688	254.325	206.862	206.757	201.258	Ccdc185	ENSMUSG00000043429	coiled-coil domain containing 185 [Source:MGI Symbol;Acc:MGI:3618292]
ENSMUST00000216522	68.5428	-0.587081	0.215229	-2.72771	0.00637763	0.0686789	45.8322	58.9289	59.5795	71.8443	95.2478	79.8239	Gm47197	ENSMUSG00000111155	predicted gene, 47197 [Source:MGI Symbol;Acc:MGI:6095992]
ENSMUST00000231971	139.731	-0.433363	0.158993	-2.72568	0.00641689	0.0686789	106.942	129.644	120.938	136.256	173.072	171.537	Gm19522	ENSMUSG00000116903	predicted gene, 19522 [Source:MGI Symbol;Acc:MGI:5011707]
ENSMUST00000129091	123.794	-0.462966	0.17037	-2.71741	0.00657946	0.0700882	101.55	108.792	100.485	157.314	159.134	115.49	Ccdc167	ENSMUSG00000024018	coiled-coil domain containing 167 [Source:MGI Symbol;Acc:MGI:1915847]
ENSMUST00000174651	464.174	0.277561	0.102316	2.71277	0.00667225	0.0707446	550.885	510.415	464.187	413.724	439.069	406.762	Gm20604	ENSMUSG00000041716	predicted gene 20604 [Source:MGI Symbol;Acc:MGI:5305180]
ENSMUST00000111795	294.232	0.311735	0.114994	2.71089	0.00671033	0.0708174	311.839	321.843	344.138	274.99	245.089	267.495	Tmem116	ENSMUSG00000029452	transmembrane protein 116 [Source:MGI Symbol;Acc:MGI:1924712]
ENSMUST00000095080	1153.91	0.57067	0.211402	2.69946	0.00694529	0.0726396	1760.5	1233.88	1143.57	839.836	982.679	962.982	Actl7b	ENSMUSG00000070980	actin-like 7b [Source:MGI Symbol;Acc:MGI:1343053]
ENSMUST00000203239	92.014	-0.532965	0.19744	-2.69937	0.00694702	0.0726396	95.2591	71.6213	58.6903	101.573	119.641	105.3	Stambp-ps1	ENSMUSG00000107505	STAM binding protein, pseudogene 1 [Source:MGI Symbol;Acc:MGI:5010194]
ENSMUST00000028636	171.227	-0.41428	0.153865	-2.69249	0.00709202	0.0738155	119.523	161.375	158.286	213.056	204.434	170.687	Galk2	ENSMUSG00000027207	galactokinase 2 [Source:MGI Symbol;Acc:MGI:1917226]
ENSMUST00000029385	64.3166	0.597398	0.222332	2.68696	0.00721045	0.0747055	81.779	69.8081	80.9215	40.8769	61.5626	50.9514	Serp1	ENSMUSG00000027808	stress-associated endoplasmic reticulum protein 1 [Source:MGI Symbol;Acc:MGI:92638]
ENSMUST00000103209	319.434	0.312635	0.116615	2.68091	0.00734215	0.0755492	366.658	383.491	311.236	283.661	293.874	277.685	Mmp28	ENSMUSG00000020682	matrix metallopeptidase 28 (epilysin) [Source:MGI Symbol;Acc:MGI:2153062]
ENSMUST00000213320	113.086	-0.448694	0.167412	-2.68017	0.00735847	0.0755492	99.7525	100.632	86.2569	138.734	126.61	126.529	Gm47046	ENSMUSG00000110865	predicted gene, 47046 [Source:MGI Symbol;Acc:MGI:6095750]
ENSMUST00000204964	135.179	0.443121	0.165535	2.67691	0.00743051	0.0759452	180.633	154.122	131.609	122.631	118.479	103.601	Gm44064	ENSMUSG00000107798	predicted gene, 44064 [Source:MGI Symbol;Acc:MGI:5690456]
ENSMUST00000150702	220.604	0.35739	0.133931	2.66846	0.0076199	0.0775316	242.641	252.034	246.321	209.34	210.242	163.045	Erich2os	ENSMUSG00000086515	glutamate rich 2, opposite strand [Source:MGI Symbol;Acc:MGI:3826593]
ENSMUST00000045016	119.081	0.473759	0.178156	2.65923	0.00783189	0.0793329	149.179	120.578	147.615	84.2313	90.6016	122.283	Cct8l1	ENSMUSG00000038044	chaperonin containing TCP1, subunit 8 (theta)-like 1 [Source:MGI Symbol;Acc:MGI:2685289]
ENSMUST00000054837	261.279	0.34032	0.128171	2.65521	0.00792601	0.0799294	303.751	319.123	254.325	208.101	236.958	245.416	1700120B22Rik	ENSMUSG00000045391	RIKEN cDNA 1700120B22 gene [Source:MGI Symbol;Acc:MGI:3604190]
ENSMUST00000033756	96.9599	0.476721	0.179874	2.65031	0.00804176	0.0806478	115.03	109.698	114.713	71.8443	81.3091	89.165	Asb9	ENSMUSG00000031384	ankyrin repeat and SOCS box-containing 9 [Source:MGI Symbol;Acc:MGI:1916549]
ENSMUST00000181174	149.179	-0.390634	0.147454	-2.6492	0.00806833	0.0806478	133.902	131.457	121.827	177.133	162.618	168.14	D630044L22Rik	ENSMUSG00000097405	RIKEN cDNA gene D630044L22 gene [Source:MGI Symbol;Acc:MGI:3709661]
ENSMUST00000163802	257.381	-0.351473	0.132955	-2.64355	0.00820421	0.0809837	195.91	259.287	222.312	325.777	271.805	269.193	Gm17139	ENSMUSG00000092006	predicted gene 17139 [Source:MGI Symbol;Acc:MGI:4937966]
ENSMUST00000222474	311.407	0.35923	0.135788	2.64552	0.00815656	0.0809837	376.543	393.464	278.334	287.377	291.551	241.17	Cpsf3	ENSMUSG00000054309	cleavage and polyadenylation specificity factor 3 [Source:MGI Symbol;Acc:MGI:1859328]
ENSMUST00000228927	259.719	-0.319678	0.120937	-2.64335	0.00820902	0.0809837	225.566	252.034	215.198	286.139	300.844	278.535	Gm35823	ENSMUSG00000115311	predicted gene, 35823 [Source:MGI Symbol;Acc:MGI:5594982]
ENSMUST00000033267	143.348	0.40996	0.155427	2.63764	0.00834857	0.082004	168.95	157.748	163.621	110.244	144.033	115.49	Pdilt	ENSMUSG00000030968	protein disulfide isomerase-like, testis expressed [Source:MGI Symbol;Acc:MGI:1919080]
ENSMUST00000205324	878.92	0.262941	0.0997866	2.63503	0.00841302	0.0822807	1101.77	938.33	835.892	828.687	778.244	790.597	Fam57b	ENSMUSG00000058966	family with sequence similarity 57, member B [Source:MGI Symbol;Acc:MGI:1916202]
ENSMUST00000035010	1145.22	0.24598	0.09343	2.63278	0.00846902	0.0824729	1366.88	1073.41	1288.52	1038.03	1017.53	1086.96	Stt3b	ENSMUSG00000032437	STT3, subunit of the oligosaccharyltransferase complex, homolog B (S. cerevisiae) [Source:MGI Symbol;Acc:MGI:1915542]
ENSMUST00000051706	495.506	0.264981	0.100755	2.62997	0.00853933	0.0828023	579.643	494.096	550.444	431.066	441.392	476.396	Ddi1	ENSMUSG00000047619	DNA-damage inducible 1 [Source:MGI Symbol;Acc:MGI:1919079]
ENSMUST00000069562	97.8028	0.478295	0.182414	2.62203	0.00874085	0.0840381	124.017	104.259	113.824	86.7087	69.6935	88.3158	Tescl	ENSMUSG00000055826	tescalcin-like [Source:MGI Symbol;Acc:MGI:1916551]
ENSMUST00000213052	125.021	-0.49046	0.186967	-2.62324	0.00870978	0.0840381	127.611	107.885	75.586	148.643	167.264	123.133	Gm45709	ENSMUSG00000110706	predicted gene 45709 [Source:MGI Symbol;Acc:MGI:5804824]
ENSMUST00000001513	67.2858	0.611392	0.233338	2.6202	0.0087877	0.084132	94.3604	61.6487	88.9247	38.3996	59.2395	61.1417	Tubb6	ENSMUSG00000001473	tubulin, beta 6 class V [Source:MGI Symbol;Acc:MGI:1915201]
ENSMUST00000180727	249.31	-0.328568	0.125605	-2.61588	0.00889971	0.0848464	199.505	230.276	232.093	302.242	275.289	256.456	Gm16794	ENSMUSG00000097777	predicted gene, 16794 [Source:MGI Symbol;Acc:MGI:4439718]
ENSMUST00000037615	118.177	-0.434819	0.166556	-2.61065	0.00903712	0.0857959	89.8671	113.325	97.8171	142.45	138.225	127.379	Aldh5a1	ENSMUSG00000035936	aldhehyde dehydrogenase family 5, subfamily A1 [Source:MGI Symbol;Acc:MGI:2441982]
ENSMUST00000052455	547.548	0.25185	0.09653	2.60904	0.00907975	0.0858415	609.299	601.982	571.786	530.162	516.894	455.166	Pigm	ENSMUSG00000050229	phosphatidylinositol glycan anchor biosynthesis, class M [Source:MGI Symbol;Acc:MGI:1914806]
ENSMUST00000122367	64.6629	0.577651	0.221711	2.60542	0.00917624	0.0863937	83.5764	65.2751	82.6999	54.5026	56.9164	45.0071	Sel1l2	ENSMUSG00000074764	sel-1 suppressor of lin-12-like 2 (C. elegans) [Source:MGI Symbol;Acc:MGI:2684964]
ENSMUST00000048621	174.687	-0.371738	0.143004	-2.59948	0.00933643	0.0868634	138.395	165.908	152.061	218.01	183.526	190.219	Pmch	ENSMUSG00000035383	pro-melanin-concentrating hormone [Source:MGI Symbol;Acc:MGI:97629]
ENSMUST00000140438	726.468	-0.239441	0.0921668	-2.59791	0.00937926	0.0868634	671.307	717.12	610.912	741.979	832.838	784.652	Mrps25	ENSMUSG00000014551	mitochondrial ribosomal protein S25 [Source:MGI Symbol;Acc:MGI:1928140]
ENSMUST00000159602	152.715	-0.382239	0.14698	-2.60062	0.00930545	0.0868634	125.814	136.896	135.166	161.03	185.849	171.537	A230009B12Rik	ENSMUSG00000089633	RIKEN cDNA A230009B12 gene [Source:MGI Symbol;Acc:MGI:2442666]
ENSMUST00000200542	389.868	-0.281264	0.108224	-2.59891	0.00935203	0.0868634	361.266	354.48	341.471	442.214	378.668	461.111	Tmem243	ENSMUSG00000079659	transmembrane protein 243, mitochondrial [Source:MGI Symbol;Acc:MGI:3606159]
ENSMUST00000172314	144.877	-0.410465	0.15835	-2.59214	0.00953811	0.0879755	125.814	102.446	144.947	158.553	171.911	165.592	Hbp1	ENSMUSG00000002996	high mobility group box transcription factor 1 [Source:MGI Symbol;Acc:MGI:894659]
ENSMUST00000020203	1544.45	-0.216314	0.0836404	-2.58624	0.00970281	0.0888797	1279.71	1520.37	1485.04	1716.83	1678.45	1586.29	Snrpf	ENSMUSG00000020018	small nuclear ribonucleoprotein polypeptide F [Source:MGI Symbol;Acc:MGI:1917128]
ENSMUST00000094807	307.759	0.29528	0.114293	2.58354	0.00977915	0.0888797	319.028	354.48	344.138	256.41	297.359	275.138	Pnmal2	ENSMUSG00000070802	PNMA-like 2 [Source:MGI Symbol;Acc:MGI:3645856]
ENSMUST00000141445	164.801	-0.405655	0.157044	-2.58306	0.00979282	0.0888797	116.827	158.655	148.504	211.817	191.657	161.346	Gm16191	ENSMUSG00000087693	predicted gene 16191 [Source:MGI Symbol;Acc:MGI:3801759]
ENSMUST00000201770	68.6395	-0.557878	0.215822	-2.5849	0.00974082	0.0888797	47.6296	67.9949	50.6871	90.4248	77.8244	77.2764	Gm42729	ENSMUSG00000106696	predicted gene 42729 [Source:MGI Symbol;Acc:MGI:5662866]
ENSMUST00000041643	116.508	-0.427704	0.165996	-2.5766	0.00997777	0.0901974	100.651	105.165	91.5924	144.927	133.579	123.133	Pcif1	ENSMUSG00000039849	PDX1 C-terminal inhibiting factor 1 [Source:MGI Symbol;Acc:MGI:2443858]
ENSMUST00000017908	148.247	0.384846	0.149562	2.57315	0.0100779	0.0907408	168.95	157.748	176.96	136.256	119.641	129.926	Zswim1	ENSMUSG00000017764	zinc finger SWIM-type containing 1 [Source:MGI Symbol;Acc:MGI:1919221]
ENSMUST00000045674	215.824	0.348786	0.135761	2.56913	0.0101955	0.0910571	274.095	213.957	238.318	177.133	189.334	202.107	Plpp6	ENSMUSG00000040105	phospholipid phosphatase 6 [Source:MGI Symbol;Acc:MGI:1921661]
ENSMUST00000064377	573.524	0.268585	0.104545	2.56909	0.0101967	0.0910571	630.867	664.537	581.567	572.277	540.125	451.769	Gcc1	ENSMUSG00000029708	golgi coiled coil 1 [Source:MGI Symbol;Acc:MGI:1921625]
ENSMUST00000193176	165.219	-0.382918	0.149121	-2.56784	0.0102334	0.0910571	132.105	146.869	151.172	211.817	159.134	190.219	Gm37456	ENSMUSG00000104287	predicted gene, 37456 [Source:MGI Symbol;Acc:MGI:5610684]
ENSMUST00000137239	528.726	0.255042	0.0994539	2.56442	0.0103347	0.0915994	620.083	578.41	527.323	510.343	453.008	483.189	9530080O11Rik	ENSMUSG00000044125	RIKEN cDNA 9530080O11 gene [Source:MGI Symbol;Acc:MGI:2441751]
ENSMUST00000228755	269.053	-0.319464	0.124737	-2.56111	0.0104338	0.0921183	223.769	232.089	260.549	330.732	299.682	267.495	Gm35823	ENSMUSG00000115311	predicted gene, 35823 [Source:MGI Symbol;Acc:MGI:5594982]
ENSMUST00000047207	168.965	0.366394	0.143346	2.55601	0.0105879	0.0931161	182.43	181.32	208.084	139.973	144.033	157.949	Ccdc27	ENSMUSG00000039492	coiled-coil domain containing 27 [Source:MGI Symbol;Acc:MGI:2685881]
ENSMUST00000141158	83.1675	-0.51708	0.202553	-2.55282	0.0106855	0.0932514	66.5016	75.2477	64.0258	74.3217	116.156	102.752	Adgrl1	ENSMUSG00000013033	adhesion G protein-coupled receptor L1 [Source:MGI Symbol;Acc:MGI:1929461]
ENSMUST00000236836	85.3723	-0.52135	0.204129	-2.55403	0.0106486	0.0932514	60.2109	84.3137	66.6935	78.0378	109.187	113.792	Gm50106	ENSMUSG00000117977	predicted gene, 50106 [Source:MGI Symbol;Acc:MGI:6302839]
ENSMUST00000022595	125.74	0.413191	0.162252	2.5466	0.0108777	0.0942044	158.166	133.27	138.722	110.244	113.833	100.204	Rgcc	ENSMUSG00000022018	regulator of cell cycle [Source:MGI Symbol;Acc:MGI:1913464]
ENSMUST00000045970	191.357	-0.339574	0.133293	-2.54757	0.0108475	0.0942044	160.862	171.347	174.292	225.443	205.596	210.599	Gpc1	ENSMUSG00000034220	glypican 1 [Source:MGI Symbol;Acc:MGI:1194891]
ENSMUST00000044492	205.286	0.34759	0.136797	2.54092	0.0110562	0.0953863	211.188	229.369	250.768	172.179	166.103	202.107	Akap9	ENSMUSG00000040407	A kinase (PRKA) anchor protein (yotiao) 9 [Source:MGI Symbol;Acc:MGI:2178217]
ENSMUST00000053766	82.7322	0.494099	0.194581	2.5393	0.0111075	0.0954655	102.448	89.7533	97.8171	78.0378	60.4011	67.9353	Amfr	ENSMUSG00000031751	autocrine motility factor receptor [Source:MGI Symbol;Acc:MGI:1345634]
ENSMUST00000192482	203.127	0.354564	0.139919	2.53406	0.011275	0.0965391	254.324	201.265	226.758	188.282	189.334	158.799	Gm17244	ENSMUSG00000102997	predicted gene, 17244 [Source:MGI Symbol;Acc:MGI:4936878]
ENSMUST00000064652	602.17	-0.254145	0.1004	-2.53132	0.0113633	0.0969299	563.467	583.85	498.867	650.315	717.843	598.679	1110051M20Rik	ENSMUSG00000040591	RIKEN cDNA 1110051M20 gene [Source:MGI Symbol;Acc:MGI:1915079]
ENSMUST00000199688	169.083	-0.361767	0.143045	-2.52905	0.0114373	0.0971955	150.078	144.149	148.504	200.669	202.111	168.989	Gm42951	ENSMUSG00000105254	predicted gene 42951 [Source:MGI Symbol;Acc:MGI:5663088]
ENSMUST00000182497	159.625	-0.366708	0.145648	-2.51778	0.0118099	0.0999872	150.977	129.644	136.944	187.043	185.849	167.291	Gm26947	ENSMUSG00000098055	predicted gene, 26947 [Source:MGI Symbol;Acc:MGI:5504062]
ENSMUST00000218524	216.306	-0.318936	0.127213	-2.50709	0.0121728	0.102677	190.518	192.199	193.856	256.41	238.12	226.734	Gm47107	ENSMUSG00000112083	predicted gene, 47107 [Source:MGI Symbol;Acc:MGI:6095844]
ENSMUST00000028882	190.056	-0.339716	0.136005	-2.49782	0.0124958	0.104239	167.153	171.347	163.621	222.965	224.181	191.068	Il1a	ENSMUSG00000027399	interleukin 1 alpha [Source:MGI Symbol;Acc:MGI:96542]
ENSMUST00000075018	72.1033	-0.544954	0.217961	-2.50024	0.0124109	0.104239	57.5149	68.9015	48.9086	106.528	74.3398	76.4272	Gm9772	ENSMUSG00000040775	predicted gene 9772 [Source:MGI Symbol;Acc:MGI:3641789]
ENSMUST00000204662	279.106	-0.299205	0.119729	-2.49903	0.0124535	0.104239	223.769	272.886	254.325	294.81	320.59	308.256	Gm44123	ENSMUSG00000107999	predicted gene, 44123 [Source:MGI Symbol;Acc:MGI:5690515]
ENSMUST00000005069	195.078	0.34175	0.13711	2.49254	0.0126834	0.104653	235.452	223.93	195.634	158.553	177.718	179.179	Nmrk2	ENSMUSG00000004939	nicotinamide riboside kinase 2 [Source:MGI Symbol;Acc:MGI:1916814]
ENSMUST00000061073	176.581	0.369651	0.148457	2.48995	0.012776	0.104653	175.241	202.172	221.422	133.779	154.487	172.386	Gm5812	ENSMUSG00000051639	predicted gene 5812 [Source:MGI Symbol;Acc:MGI:3644887]
ENSMUST00000160540	684.384	-0.264118	0.10606	-2.49027	0.0127647	0.104653	563.467	649.125	650.039	821.255	786.375	636.044	Gm15841	ENSMUSG00000089653	predicted gene 15841 [Source:MGI Symbol;Acc:MGI:3801860]
ENSMUST00000176035	87.5361	-0.482018	0.193491	-2.49116	0.0127327	0.104653	65.603	77.0609	75.586	121.392	96.4094	89.165	Amz1	ENSMUSG00000050022	archaelysin family metallopeptidase 1 [Source:MGI Symbol;Acc:MGI:2442258]
ENSMUST00000187259	252.132	-0.309609	0.124203	-2.49276	0.0126753	0.104653	208.492	238.435	227.647	308.435	264.835	264.947	Gm16759	ENSMUSG00000086539	predicted gene, 16759 [Source:MGI Symbol;Acc:MGI:4439683]
ENSMUST00000196780	127.617	-0.399914	0.160751	-2.48778	0.0128542	0.104915	99.7525	121.484	108.488	142.45	156.81	136.72	Rsbn1l	ENSMUSG00000039968	round spermatid basic protein 1-like [Source:MGI Symbol;Acc:MGI:3036237]
ENSMUST00000129353	686.194	0.228768	0.0920599	2.48499	0.0129556	0.105363	723.43	751.57	743.41	689.953	633.049	575.751	1700112J05Rik	ENSMUSG00000086632	RIKEN cDNA 1700112J05 gene [Source:MGI Symbol;Acc:MGI:3696786]
ENSMUST00000034775	389.436	0.258071	0.104023	2.48091	0.0131049	0.105733	430.463	397.09	445.513	354.267	344.983	364.303	Fem1b	ENSMUSG00000032244	feminization 1 homolog b (C. elegans) [Source:MGI Symbol;Acc:MGI:1335087]
ENSMUST00000051907	819.874	0.208291	0.084053	2.47809	0.0132086	0.105733	901.367	900.253	835.892	777.901	725.974	777.859	Spata21	ENSMUSG00000045004	spermatogenesis associated 21 [Source:MGI Symbol;Acc:MGI:3607787]
ENSMUST00000065005	72.3304	-0.548857	0.221308	-2.48006	0.013136	0.105733	74.5897	53.4893	48.0193	101.573	69.6935	86.6174	Atg4d	ENSMUSG00000002820	autophagy related 4D, cysteine peptidase [Source:MGI Symbol;Acc:MGI:2444308]
ENSMUST00000138259	63.1099	0.594378	0.239693	2.47974	0.0131476	0.105733	64.7043	76.1543	85.3677	55.7413	62.7242	33.9676	Gm15527	ENSMUSG00000086946	predicted gene 15527 [Source:MGI Symbol;Acc:MGI:3782974]
ENSMUST00000237729	130.262	-0.407417	0.164453	-2.47741	0.0132341	0.105733	94.3604	132.363	109.377	141.211	155.649	148.608	Gm50205	ENSMUSG00000117955	predicted gene, 50205 [Source:MGI Symbol;Acc:MGI:6302988]
ENSMUST00000181745	6251	0.232844	0.0940526	2.47568	0.0132982	0.105873	7467.95	7005.29	5788.11	5826.82	6042.43	5375.38	Gm26657	ENSMUSG00000096930	predicted gene, 26657 [Source:MGI Symbol;Acc:MGI:5477151]
ENSMUST00000051676	164.652	0.385189	0.155959	2.46982	0.0135182	0.106522	221.073	155.935	183.185	142.45	132.418	152.854	Tent5b	ENSMUSG00000046694	terminal nucleotidyltransferase 5B [Source:MGI Symbol;Acc:MGI:2140500]
ENSMUST00000093942	107.796	-0.44198	0.178851	-2.47122	0.0134653	0.106522	111.435	84.3137	78.2537	122.631	131.256	118.887	Gpr179	ENSMUSG00000070337	G protein-coupled receptor 179 [Source:MGI Symbol;Acc:MGI:2443409]
ENSMUST00000153572	420.191	-0.271236	0.109823	-2.46975	0.0135207	0.106522	342.394	436.074	363.702	455.84	473.916	449.222	4930565N06Rik	ENSMUSG00000084834	RIKEN cDNA 4930565N06 gene [Source:MGI Symbol;Acc:MGI:1915556]
ENSMUST00000035732	336.269	0.293268	0.118877	2.46698	0.0136256	0.106978	406.199	347.227	360.145	273.752	288.067	342.224	Tekt3	ENSMUSG00000042189	tektin 3 [Source:MGI Symbol;Acc:MGI:1918312]
ENSMUST00000031384	237.228	-0.301709	0.122615	-2.46062	0.0138698	0.108519	212.086	215.771	208.973	279.945	254.381	252.21	B3gnt4	ENSMUSG00000029431	UDP-GlcNAc:betaGal beta-1,3-N-acetylglucosaminyltransferase 4 [Source:MGI Symbol;Acc:MGI:2680208]
ENSMUST00000041463	130.884	0.405313	0.164988	2.45662	0.0140249	0.10906	133.902	162.281	152.061	120.153	92.9247	123.982	Pacrg	ENSMUSG00000037196	PARK2 co-regulated [Source:MGI Symbol;Acc:MGI:1916560]
ENSMUST00000130992	110.31	0.416265	0.169464	2.45636	0.0140351	0.10906	125.814	118.764	133.387	91.6635	102.217	90.0142	Atp6v1g2	ENSMUSG00000024403	ATPase, H+ transporting, lysosomal V1 subunit G2 [Source:MGI Symbol;Acc:MGI:1913487]
ENSMUST00000057910	108.047	0.455446	0.185607	2.45383	0.0141345	0.109458	102.448	150.495	121.827	102.812	78.986	91.7126	Rexo1	ENSMUSG00000047417	REX1, RNA exonuclease 1 [Source:MGI Symbol;Acc:MGI:1914182]
ENSMUST00000068714	76.77	-0.513742	0.21025	-2.44348	0.0145465	0.112265	70.995	58.0223	59.5795	107.767	92.9247	71.332	Sos1	ENSMUSG00000024241	SOS Ras/Rac guanine nucleotide exchange factor 1 [Source:MGI Symbol;Acc:MGI:98354]
ENSMUST00000043584	1403.12	0.196529	0.0807382	2.43415	0.0149268	0.11481	1575.37	1365.34	1555.29	1324.17	1269.58	1328.98	Tubb4b	ENSMUSG00000036752	tubulin, beta 4B class IVB [Source:MGI Symbol;Acc:MGI:1915472]
ENSMUST00000185435	226.313	-0.347939	0.143101	-2.43142	0.0150399	0.115289	166.254	215.771	214.308	244.023	295.036	222.488	Rasa2	ENSMUSG00000032413	RAS p21 protein activator 2 [Source:MGI Symbol;Acc:MGI:2149960]
ENSMUST00000207689	95.5579	-0.442997	0.182968	-2.42118	0.0154702	0.118188	82.6777	83.4071	76.4752	102.812	127.771	100.204	Gm32111	ENSMUSG00000109289	predicted gene, 32111 [Source:MGI Symbol;Acc:MGI:5591270]
ENSMUST00000054674	103.541	-0.44285	0.183092	-2.41872	0.0155751	0.11859	88.0697	106.072	69.3612	120.153	116.156	121.434	Hjurp	ENSMUSG00000044783	Holliday junction recognition protein [Source:MGI Symbol;Acc:MGI:2685821]
ENSMUST00000085073	550.522	0.248468	0.102982	2.41272	0.0158339	0.120158	623.678	526.734	644.704	480.614	489.016	538.387	Actl11	ENSMUSG00000066368	actin-like 11 [Source:MGI Symbol;Acc:MGI:1914972]
ENSMUST00000123504	79.6401	-0.48478	0.201152	-2.41001	0.015952	0.120262	70.0963	59.8355	69.3612	76.7991	109.187	92.5618	Pusl1	ENSMUSG00000051557	pseudouridylate synthase-like 1 [Source:MGI Symbol;Acc:MGI:3047787]
ENSMUST00000143711	276.596	-0.280807	0.116577	-2.40876	0.0160067	0.120262	255.222	252.034	242.764	279.945	317.106	312.502	Dnal1	ENSMUSG00000042523	dynein, axonemal, light chain 1 [Source:MGI Symbol;Acc:MGI:1921462]
ENSMUST00000183915	62.3445	0.548707	0.227733	2.40943	0.0159776	0.120262	82.6777	64.3685	74.6967	44.593	62.7242	45.0071	Riiad1	ENSMUSG00000028139	regulatory subunit of type II PKA R-subunit (RIIa) domain containing 1 [Source:MGI Symbol;Acc:MGI:1913603]
ENSMUST00000025477	111.477	0.425562	0.176856	2.40626	0.0161169	0.120294	104.246	137.803	141.39	100.334	88.2785	96.8077	St8sia3	ENSMUSG00000056812	ST8 alpha-N-acetyl-neuraminide alpha-2,8-sialyltransferase 3 [Source:MGI Symbol;Acc:MGI:106019]
ENSMUST00000210317	1156.88	-0.202043	0.0839309	-2.40725	0.016073	0.120294	1018.19	1135.97	1071.54	1336.55	1217.31	1161.69	Grtp1	ENSMUSG00000038515	GH regulated TBC protein 1 [Source:MGI Symbol;Acc:MGI:1914040]
ENSMUST00000130660	358.905	0.265663	0.110534	2.40346	0.0162409	0.120427	395.415	397.997	379.708	348.073	342.66	289.574	Armh1	ENSMUSG00000060268	armadillo-like helical domain containing 1 [Source:MGI Symbol;Acc:MGI:2686507]
ENSMUST00000207649	501.8	-0.255801	0.106402	-2.40411	0.0162121	0.120427	443.045	458.739	467.744	624.303	535.479	481.491	Gm44709	ENSMUSG00000109168	predicted gene 44709 [Source:MGI Symbol;Acc:MGI:5753285]
ENSMUST00000198220	134.77	-0.388743	0.162061	-2.39874	0.0164514	0.12159	104.246	129.644	115.602	146.166	175.395	137.569	4930432H08Rik	ENSMUSG00000106594	RIKEN cDNA 4930432H08 gene [Source:MGI Symbol;Acc:MGI:1921031]
ENSMUST00000038874	254.701	-0.282992	0.118214	-2.3939	0.0166701	0.122807	225.566	231.183	232.093	287.377	281.097	270.892	Scai	ENSMUSG00000035236	suppressor of cancer cell invasion [Source:MGI Symbol;Acc:MGI:2443716]
ENSMUST00000056991	144.281	0.370178	0.154712	2.3927	0.0167251	0.122813	176.139	148.682	164.511	113.96	123.125	139.267	Spata46	ENSMUSG00000042800	spermatogenesis associated 46 [Source:MGI Symbol;Acc:MGI:1924175]
ENSMUST00000031434	268.913	-0.29219	0.122218	-2.39073	0.0168149	0.123075	215.681	253.848	255.214	287.377	319.429	281.931	Rnf34	ENSMUSG00000029474	ring finger protein 34 [Source:MGI Symbol;Acc:MGI:2153340]
ENSMUST00000200590	399.998	-0.244367	0.10241	-2.38617	0.0170249	0.124211	351.38	385.304	361.034	440.976	446.039	415.254	Gm43766	ENSMUSG00000105868	predicted gene 43766 [Source:MGI Symbol;Acc:MGI:5663903]
ENSMUST00000232334	698.355	-0.235751	0.0989334	-2.38292	0.0171758	0.12491	611.995	708.054	602.909	838.597	705.066	723.51	Gm49727	ENSMUSG00000116836	predicted gene, 49727 [Source:MGI Symbol;Acc:MGI:6215207]
ENSMUST00000155638	111.116	-0.436209	0.183574	-2.3762	0.0174921	0.126804	101.55	103.352	77.3645	131.302	148.68	104.45	Cox6c	ENSMUSG00000014313	cytochrome c oxidase subunit 6C [Source:MGI Symbol;Acc:MGI:104614]
ENSMUST00000129252	92.5452	-0.452268	0.190812	-2.37023	0.0177771	0.128459	79.083	82.5005	72.029	131.302	95.2478	95.1094	Nab2	ENSMUSG00000025402	Ngfi-A binding protein 2 [Source:MGI Symbol;Acc:MGI:107563]
ENSMUST00000233032	640.928	-0.238546	0.100781	-2.36697	0.0179346	0.129186	572.453	648.218	542.44	666.418	768.952	647.083	Mea1	ENSMUSG00000002768	male enhanced antigen 1 [Source:MGI Symbol;Acc:MGI:96957]
ENSMUST00000128384	74.571	0.503764	0.213387	2.3608	0.0182356	0.130938	66.5016	94.2863	101.374	61.9348	63.8857	59.4433	Fam187b	ENSMUSG00000046826	family with sequence similarity 187, member B [Source:MGI Symbol;Acc:MGI:1923665]
ENSMUST00000020776	115.656	0.40053	0.169921	2.35715	0.0184158	0.130999	124.017	121.484	149.393	91.6635	108.025	99.3553	Ccdc117	ENSMUSG00000020482	coiled-coil domain containing 117 [Source:MGI Symbol;Acc:MGI:2144383]
ENSMUST00000102645	395.669	-0.260865	0.110655	-2.35746	0.0184004	0.130999	334.306	394.37	350.363	478.136	400.738	416.103	Med19	ENSMUSG00000027080	mediator complex subunit 19 [Source:MGI Symbol;Acc:MGI:1914234]
ENSMUST00000206896	108.631	0.421726	0.179004	2.35596	0.0184749	0.130999	136.598	123.297	112.934	80.5152	112.671	85.7683	Gm44649	ENSMUSG00000108321	predicted gene 44649 [Source:MGI Symbol;Acc:MGI:5753225]
ENSMUST00000210502	73.0074	-0.482272	0.204669	-2.35635	0.0184554	0.130999	58.4136	60.7421	63.1365	81.7539	97.5709	76.4272	Gm7562	ENSMUSG00000109623	predicted gene 7562 [Source:MGI Symbol;Acc:MGI:3645249]
ENSMUST00000021466	326.636	-0.280481	0.119323	-2.35061	0.0187428	0.131257	309.143	294.645	279.223	362.938	403.061	310.804	Atl1	ENSMUSG00000021066	atlastin GTPase 1 [Source:MGI Symbol;Acc:MGI:1921241]
ENSMUST00000209766	202.093	-0.341694	0.145312	-2.35145	0.0187003	0.131257	168.95	203.078	161.843	214.294	264.835	199.56	Ric8a	ENSMUSG00000025485	RIC8 guanine nucleotide exchange factor A [Source:MGI Symbol;Acc:MGI:2141866]
ENSMUST00000222091	96.0749	-0.441108	0.187558	-2.35185	0.0186805	0.131257	85.3737	87.9401	70.2505	130.063	106.863	95.9585	Heatr1	ENSMUSG00000050244	HEAT repeat containing 1 [Source:MGI Symbol;Acc:MGI:2442524]
ENSMUST00000230690	122.335	-0.408064	0.173347	-2.35404	0.0185708	0.131257	115.03	114.231	85.3677	139.973	157.972	121.434	Gm38619	ENSMUSG00000116197	predicted gene, 38619 [Source:MGI Symbol;Acc:MGI:5621504]
ENSMUST00000021251	832.024	0.222407	0.09467	2.34929	0.0188093	0.131318	984.943	796.9	907.921	746.933	741.074	814.374	Lrrc46	ENSMUSG00000020878	leucine rich repeat containing 46 [Source:MGI Symbol;Acc:MGI:1916547]
ENSMUST00000110718	94.57	-0.425334	0.181225	-2.347	0.0189255	0.131724	75.4883	87.0335	79.143	110.244	116.156	99.3553	Ankrd61	ENSMUSG00000029607	ankyrin repeat domain 61 [Source:MGI Symbol;Acc:MGI:1913979]
ENSMUST00000008733	109.191	0.404634	0.172696	2.34304	0.0191276	0.132723	131.206	123.297	120.048	82.9926	90.6016	106.998	Dnajb6	ENSMUSG00000029131	DnaJ heat shock protein family (Hsp40) member B6 [Source:MGI Symbol;Acc:MGI:1344381]
ENSMUST00000181387	178.279	-0.331796	0.141784	-2.34015	0.0192761	0.133346	163.558	165.001	144.058	200.669	217.211	179.179	Gm26749	ENSMUSG00000097546	predicted gene, 26749 [Source:MGI Symbol;Acc:MGI:5477243]
ENSMUST00000180987	250.826	-0.316012	0.135271	-2.33614	0.0194842	0.133969	212.985	222.117	232.983	298.526	312.459	225.885	6230400D17Rik	ENSMUSG00000097577	RIKEN cDNA 6230400D17 gene [Source:MGI Symbol;Acc:MGI:1923383]
ENSMUST00000200668	535.83	-0.227333	0.0972651	-2.33725	0.0194261	0.133969	493.37	474.151	513.095	542.549	633.049	558.767	Gm42917	ENSMUSG00000104985	predicted gene 42917 [Source:MGI Symbol;Acc:MGI:5663054]
ENSMUST00000201951	200.629	-0.316962	0.135747	-2.33495	0.0195462	0.133989	170.747	203.078	161.843	227.92	225.342	214.845	Gm42811	ENSMUSG00000106862	predicted gene 42811 [Source:MGI Symbol;Acc:MGI:5662948]
ENSMUST00000225099	927.766	-0.212631	0.091135	-2.33314	0.0196407	0.134231	829.473	960.995	786.983	1028.12	1008.23	952.792	Gm48265	ENSMUSG00000114945	predicted gene, 48265 [Source:MGI Symbol;Acc:MGI:6097686]
ENSMUST00000033275	91.6904	0.476694	0.204905	2.32641	0.0199967	0.136254	112.334	96.0995	113.824	54.5026	73.1782	100.204	Tex36	ENSMUSG00000030976	testis expressed 36 [Source:MGI Symbol;Acc:MGI:1921058]
ENSMUST00000151825	450.158	-0.257934	0.111161	-2.32037	0.020321	0.13682	400.807	409.783	417.057	494.239	558.71	420.349	Gm16062	ENSMUSG00000087249	predicted gene 16062 [Source:MGI Symbol;Acc:MGI:3802162]
ENSMUST00000163881	138.648	-0.35877	0.154514	-2.32192	0.0202372	0.13682	119.523	125.111	120.048	138.734	173.072	155.402	Gm17364	ENSMUSG00000090853	predicted gene, 17364 [Source:MGI Symbol;Acc:MGI:4936998]
ENSMUST00000172910	879.387	-0.192649	0.0830138	-2.32068	0.0203039	0.13682	804.31	854.016	802.101	974.853	953.64	887.404	Crybg3	ENSMUSG00000022723	beta-gamma crystallin domain containing 3 [Source:MGI Symbol;Acc:MGI:2676311]
ENSMUST00000208321	379.593	-0.239698	0.103213	-2.32237	0.0202128	0.13682	345.09	332.722	366.37	413.724	411.192	408.461	Gm38405	ENSMUSG00000109002	predicted gene, 38405 [Source:MGI Symbol;Acc:MGI:5621290]
ENSMUST00000095079	384.821	0.251935	0.108713	2.31743	0.0204801	0.137338	450.234	407.063	399.272	353.028	320.59	378.739	Actl7a	ENSMUSG00000070979	actin-like 7a [Source:MGI Symbol;Acc:MGI:1343051]
ENSMUST00000186030	98.2211	-0.418479	0.180634	-2.31672	0.020519	0.137338	95.2591	70.7147	86.2569	111.483	112.671	112.942	1700055D18Rik	ENSMUSG00000070997	RIKEN cDNA 1700055D18 gene [Source:MGI Symbol;Acc:MGI:1920655]
ENSMUST00000205406	13708.4	-0.184662	0.0799853	-2.3087	0.0209602	0.139879	13505.2	12727.7	12263.6	15312.8	13824.9	14616.3	CT010467.1	ENSMUSG00000106106	18s RNA, related sequence 5
ENSMUST00000027286	62.6845	0.547774	0.237817	2.30334	0.0212597	0.14105	86.2724	52.5827	84.4784	44.593	58.0779	50.1022	Coa5	ENSMUSG00000026112	cytochrome C oxidase assembly factor 5 [Source:MGI Symbol;Acc:MGI:1923428]
ENSMUST00000221808	259.936	-0.310998	0.135021	-2.30333	0.0212601	0.14105	189.62	262.007	244.543	310.913	257.866	294.669	Gm48559	ENSMUSG00000113298	predicted gene, 48559 [Source:MGI Symbol;Acc:MGI:6098115]
ENSMUST00000144376	111.177	-0.391071	0.169871	-2.30216	0.0213263	0.141077	92.5631	104.259	92.4817	111.483	131.256	135.021	Rasa2	ENSMUSG00000032413	RAS p21 protein activator 2 [Source:MGI Symbol;Acc:MGI:2149960]
ENSMUST00000184420	135.886	-0.361947	0.157504	-2.29802	0.0215606	0.142212	119.523	130.55	107.599	148.643	141.71	167.291	Gm10603	ENSMUSG00000099137	predicted gene 10603 [Source:MGI Symbol;Acc:MGI:3642592]
ENSMUST00000003038	302.267	0.271321	0.118228	2.29489	0.0217394	0.142784	341.495	298.271	350.363	289.855	282.259	251.36	Ap2a2	ENSMUSG00000002957	adaptor-related protein complex 2, alpha 2 subunit [Source:MGI Symbol;Acc:MGI:101920]
ENSMUST00000204911	1423.95	-0.207779	0.0905631	-2.2943	0.0217731	0.142784	1281.5	1309.13	1370.33	1622.69	1641.28	1318.79	4930417O13Rik	ENSMUSG00000108129	RIKEN cDNA 4930417O13 gene [Source:MGI Symbol;Acc:MGI:1921120]
ENSMUST00000041282	271.37	0.308609	0.134802	2.28935	0.0220588	0.14424	328.015	252.034	322.797	226.681	221.858	276.836	Trim37	ENSMUSG00000018548	tripartite motif-containing 37 [Source:MGI Symbol;Acc:MGI:2153072]
ENSMUST00000186160	204.22	0.315684	0.13826	2.28327	0.0224145	0.146145	236.35	249.315	194.745	170.94	181.203	192.766	1700105P06Rik	ENSMUSG00000099923	RIKEN cDNA 1700105P06 gene [Source:MGI Symbol;Acc:MGI:1915479]
ENSMUST00000156384	91.5786	0.428018	0.188068	2.27587	0.0228535	0.148581	90.7657	105.165	119.159	74.3217	83.6322	76.4272	Cylc2	ENSMUSG00000039555	cylicin, basic protein of sperm head cytoskeleton 2 [Source:MGI Symbol;Acc:MGI:1922164]
ENSMUST00000160742	118.375	-0.40455	0.17822	-2.26994	0.0232111	0.150474	91.6644	129.644	84.4784	139.973	127.771	136.72	Snapc3	ENSMUSG00000028483	small nuclear RNA activating complex, polypeptide 3 [Source:MGI Symbol;Acc:MGI:1916338]
ENSMUST00000031598	495.051	-0.224342	0.0988928	-2.26854	0.0232963	0.150596	440.349	500.443	428.617	547.503	531.994	521.403	Ddx54	ENSMUSG00000029599	DEAD (Asp-Glu-Ala-Asp) box polypeptide 54 [Source:MGI Symbol;Acc:MGI:1919240]
ENSMUST00000145804	160.425	0.354833	0.156681	2.26467	0.0235326	0.151536	199.505	187.666	152.061	135.018	162.618	125.68	Ppp1r18os	ENSMUSG00000087443	protein phosphatase 1, regulatory subunit 18, opposite strand [Source:MGI Symbol;Acc:MGI:1918627]
ENSMUST00000169803	1607.84	0.199802	0.0882526	2.26398	0.0235753	0.151536	1938.43	1583.83	1636.21	1414.59	1521.64	1552.32	Rimbp3	ENSMUSG00000071636	RIMS binding protein 3 [Source:MGI Symbol;Acc:MGI:2685449]
ENSMUST00000186876	200.736	-0.305896	0.135222	-2.26218	0.0236864	0.151821	168.051	196.732	174.292	232.875	199.788	232.678	Gm29542	ENSMUSG00000099851	predicted gene 29542 [Source:MGI Symbol;Acc:MGI:5580248]
ENSMUST00000204396	72.5934	-0.458717	0.203344	-2.25587	0.0240788	0.153901	55.7176	60.7421	66.6935	90.4248	81.3091	80.6731	Gm44443	ENSMUSG00000108155	predicted gene, 44443 [Source:MGI Symbol;Acc:MGI:5690835]
ENSMUST00000100882	150.248	0.337239	0.149793	2.25137	0.0243622	0.155274	185.126	155.028	162.732	136.256	132.418	129.926	Gm6588	ENSMUSG00000072722	predicted gene 6588 [Source:MGI Symbol;Acc:MGI:3648937]
ENSMUST00000008907	73.5114	0.487632	0.216911	2.24808	0.0245712	0.155732	83.5764	74.3411	100.485	63.1735	46.4623	73.0304	Man1a2	ENSMUSG00000008763	mannosidase, alpha, class 1A, member 2 [Source:MGI Symbol;Acc:MGI:104676]
ENSMUST00000077235	81.6808	0.44851	0.199497	2.2482	0.0245636	0.155732	108.739	83.4071	91.5924	63.1735	65.0473	78.1255	CAAA01118383.1	ENSMUSG00000063897	dehydrogenase/reductase (SDR family) X chromosome [Source:NCBI gene;Acc:236082]
ENSMUST00000021077	91.0659	0.43615	0.194575	2.24155	0.0249901	0.156152	124.017	90.6599	98.7064	76.7991	88.2785	67.9353	Slc9a3r1	ENSMUSG00000020733	solute carrier family 9 (sodium/hydrogen exchanger), member 3 regulator 1 [Source:MGI Symbol;Acc:MGI:1349482]
ENSMUST00000022678	383.298	0.256278	0.114376	2.24066	0.025048	0.156152	477.194	389.837	385.933	324.538	355.437	366.85	Pebp4	ENSMUSG00000022085	phosphatidylethanolamine binding protein 4 [Source:MGI Symbol;Acc:MGI:1920773]
ENSMUST00000125230	388.294	-0.244505	0.109069	-2.24175	0.0249774	0.156152	355.874	351.76	356.588	434.782	458.816	371.946	Myo1h	ENSMUSG00000066952	myosin 1H [Source:MGI Symbol;Acc:MGI:1914674]
ENSMUST00000126656	98.4519	-0.402961	0.179589	-2.24379	0.0248458	0.156152	89.8671	77.0609	88.0354	112.721	99.894	123.133	Efcab8	ENSMUSG00000044083	EF-hand calcium binding domain 8 [Source:MGI Symbol;Acc:MGI:3644206]
ENSMUST00000150544	208.489	0.355799	0.158795	2.24063	0.0250503	0.156152	241.742	282.859	176.96	206.862	168.426	174.084	Gm14573	ENSMUSG00000085624	predicted gene 14573 [Source:MGI Symbol;Acc:MGI:3705150]
ENSMUST00000221429	203.986	0.305703	0.136216	2.24424	0.0248167	0.156152	248.033	228.463	199.191	187.043	190.496	170.687	Gm40578	ENSMUSG00000113029	predicted gene, 40578 [Source:MGI Symbol;Acc:MGI:5623463]
ENSMUST00000180609	202.121	0.301377	0.13485	2.23491	0.025423	0.158041	210.289	246.595	211.641	191.998	182.365	169.838	A330032B11Rik	ENSMUSG00000097591	RIKEN cDNA A330032B11 gene [Source:MGI Symbol;Acc:MGI:2443002]
ENSMUST00000034983	313.45	0.279394	0.125088	2.23358	0.0255104	0.158151	391.82	311.87	329.021	284.9	249.735	313.351	Atp1b3	ENSMUSG00000032412	ATPase, Na+/K+ transporting, beta 3 polypeptide [Source:MGI Symbol;Acc:MGI:107788]
ENSMUST00000059231	182.073	0.313512	0.140564	2.23038	0.025722	0.159028	226.465	185.853	192.967	168.463	155.649	163.045	Frat2	ENSMUSG00000047604	frequently rearranged in advanced T cell lymphomas 2 [Source:MGI Symbol;Acc:MGI:2673967]
ENSMUST00000093342	249.511	0.27818	0.124792	2.22915	0.0258036	0.159099	277.689	282.859	261.439	196.953	236.958	241.17	4933402J07Rik	ENSMUSG00000069971	RIKEN cDNA 4933402J07 gene [Source:MGI Symbol;Acc:MGI:3607717]
ENSMUST00000025872	68.0924	0.904344	0.407373	2.21994	0.026423	0.161574	101.55	67.0883	97.8171	26.0126	68.532	47.5547	4430402I18Rik	ENSMUSG00000064202	RIKEN cDNA 4430402I18 gene [Source:MGI Symbol;Acc:MGI:1918036]
ENSMUST00000085894	79.2966	0.452069	0.203704	2.21924	0.0264703	0.161574	107.84	86.1269	81.8107	63.1735	60.4011	76.4272	Cfap45	ENSMUSG00000026546	cilia and flagella associated protein 45 [Source:MGI Symbol;Acc:MGI:1919120]
ENSMUST00000095132	196.162	0.345903	0.155728	2.2212	0.0263377	0.161574	225.566	216.677	219.644	147.405	145.195	222.488	Spag6	ENSMUSG00000037708	sperm associated antigen 6 [Source:MGI Symbol;Acc:MGI:3040687]
ENSMUST00000210682	497.793	0.231913	0.104515	2.21895	0.0264899	0.161574	572.453	481.404	561.115	448.408	427.454	495.927	Nup98	ENSMUSG00000063550	nucleoporin 98 [Source:MGI Symbol;Acc:MGI:109404]
ENSMUST00000050140	345.194	0.252854	0.114237	2.21342	0.0268689	0.162773	393.618	394.37	337.025	309.674	342.66	293.82	Tmem88	ENSMUSG00000045377	transmembrane protein 88 [Source:MGI Symbol;Acc:MGI:1914270]
ENSMUST00000206520	839.44	-0.199123	0.0899812	-2.21294	0.0269017	0.162773	790.83	805.966	745.189	943.886	943.186	807.58	Olfr1508	ENSMUSG00000057564	olfactory receptor 1508 [Source:MGI Symbol;Acc:MGI:3031342]
ENSMUST00000227898	201.474	-0.31166	0.140712	-2.21488	0.0267683	0.162773	159.963	199.452	178.739	255.171	212.565	202.957	4933431J24Rik	ENSMUSG00000115774	RIKEN cDNA 4933431J24 gene [Source:MGI Symbol;Acc:MGI:1918548]
ENSMUST00000107095	137.526	-0.344378	0.155895	-2.20904	0.0271717	0.16397	113.233	135.083	114.713	154.837	163.78	143.513	Gm15441	ENSMUSG00000074398	predicted gene 15441 [Source:MGI Symbol;Acc:MGI:3641753]
ENSMUST00000083103	2602.25	0.36297	0.164773	2.20286	0.0276049	0.166142	3524.59	2864.85	2394.74	2242.04	2197.67	2389.62	Rn7sk	ENSMUSG00000065037	RNA, 7SK, nuclear [Source:MGI Symbol;Acc:MGI:103186]
ENSMUST00000172831	206.744	0.296654	0.134759	2.20137	0.0277095	0.16633	250.729	210.331	223.201	194.475	167.264	194.465	Rgs22	ENSMUSG00000037627	regulator of G-protein signalling 22 [Source:MGI Symbol;Acc:MGI:3613651]
ENSMUST00000019065	131.235	0.359145	0.163272	2.19967	0.0278304	0.166615	150.977	126.924	165.4	107.767	111.51	124.831	Pelp1	ENSMUSG00000018921	proline, glutamic acid and leucine rich protein 1 [Source:MGI Symbol;Acc:MGI:1922523]
ENSMUST00000204899	321.816	-0.243478	0.110748	-2.19848	0.027915	0.166682	295.663	298.271	289.005	353.028	370.537	324.391	Gm43980	ENSMUSG00000107962	predicted gene, 43980 [Source:MGI Symbol;Acc:MGI:5690372]
ENSMUST00000170317	107.878	0.398073	0.181263	2.19611	0.028084	0.167251	130.307	134.177	102.263	102.812	98.7325	78.9747	Gm17661	ENSMUSG00000091037	predicted gene, 17661 [Source:MGI Symbol;Acc:MGI:4937295]
ENSMUST00000163713	63.9803	-0.529399	0.241393	-2.1931	0.0283003	0.168098	38.6428	71.6213	46.2408	81.7539	83.6322	61.9909	Ccnh	ENSMUSG00000021548	cyclin H [Source:MGI Symbol;Acc:MGI:1913921]
ENSMUST00000008094	65.1315	0.478838	0.218705	2.18942	0.0285661	0.168793	85.3737	67.9949	73.8075	50.7865	62.7242	50.1022	Abhd8	ENSMUSG00000007950	abhydrolase domain containing 8 [Source:MGI Symbol;Acc:MGI:1918946]
ENSMUST00000064110	121.687	-0.380932	0.173959	-2.18978	0.0285402	0.168793	85.3737	113.325	117.381	146.166	149.841	118.038	Doc2a	ENSMUSG00000052301	double C2, alpha [Source:MGI Symbol;Acc:MGI:109446]
ENSMUST00000114634	103.557	-0.378502	0.173196	-2.18539	0.0288601	0.170087	91.6644	88.8467	88.9247	122.631	123.125	106.149	Boc	ENSMUSG00000022687	biregional cell adhesion molecule-related/down-regulated by oncogenes (Cdon) binding protein [Source:MGI Symbol;Acc:MGI:2151153]
ENSMUST00000050120	105.812	-0.390743	0.179526	-2.17652	0.029516	0.173502	91.6644	97.9127	84.4784	111.483	144.033	105.3	Kctd4	ENSMUSG00000046523	potassium channel tetramerisation domain containing 4 [Source:MGI Symbol;Acc:MGI:1914766]
ENSMUST00000047497	170.39	0.309854	0.142558	2.17354	0.02974	0.174367	195.91	188.573	182.296	156.076	134.741	164.743	Cep104	ENSMUSG00000039523	centrosomal protein 104 [Source:MGI Symbol;Acc:MGI:2687282]
ENSMUST00000052380	80.0715	0.42742	0.19713	2.16822	0.0301419	0.176268	88.9684	96.0995	90.7032	75.5604	56.9164	72.1812	Insl6	ENSMUSG00000050957	insulin-like 6 [Source:MGI Symbol;Acc:MGI:1351595]
ENSMUST00000148685	196.321	-0.291546	0.134656	-2.16512	0.0303782	0.177193	195.012	170.441	163.621	222.965	219.535	206.353	Acss2os	ENSMUSG00000086529	acyl-CoA synthetase short-chain family member 2, opposite strand [Source:MGI Symbol;Acc:MGI:1922195]
ENSMUST00000030475	93.1441	0.423657	0.196097	2.16045	0.0307381	0.178833	107.84	120.578	91.5924	96.6182	61.5626	80.6731	Nsun4	ENSMUSG00000028706	NOL1/NOP2/Sun domain family, member 4 [Source:MGI Symbol;Acc:MGI:1919431]
ENSMUST00000013807	77.6516	0.453955	0.21099	2.15154	0.0314334	0.17985	90.7657	68.9015	109.377	68.1282	65.0473	63.6893	Pten	ENSMUSG00000013663	phosphatase and tensin homolog [Source:MGI Symbol;Acc:MGI:109583]
ENSMUST00000049420	266.522	0.250777	0.11658	2.15111	0.0314679	0.17985	285.777	285.579	297.898	235.352	247.412	247.114	Tsga8	ENSMUSG00000035522	testis specific gene A8 [Source:MGI Symbol;Acc:MGI:1194903]
ENSMUST00000100396	334.407	0.248382	0.115344	2.1534	0.0312871	0.17985	380.138	335.442	375.262	310.913	271.805	332.883	4930407I10Rik	ENSMUSG00000075524	RIKEN cDNA 4930407I10 gene [Source:MGI Symbol;Acc:MGI:2685593]
ENSMUST00000117346	79.9216	0.428489	0.198755	2.15587	0.0310939	0.17985	93.4618	78.8741	103.153	65.6509	66.2088	72.1812	Best1	ENSMUSG00000037418	bestrophin 1 [Source:MGI Symbol;Acc:MGI:1346332]
ENSMUST00000119795	77.8573	0.432821	0.200856	2.15488	0.0311712	0.17985	88.9684	83.4071	96.9279	55.7413	67.3704	74.7288	Gm12206	ENSMUSG00000083175	predicted gene 12206 [Source:MGI Symbol;Acc:MGI:3650472]
ENSMUST00000133181	235.539	-0.273875	0.126983	-2.15678	0.031023	0.17985	205.796	239.342	194.745	262.603	250.897	259.852	Cdc23	ENSMUSG00000024370	CDC23 cell division cycle 23 [Source:MGI Symbol;Acc:MGI:1098815]
ENSMUST00000188296	69.3542	0.474539	0.220451	2.15258	0.0313517	0.17985	89.8671	78.8741	74.6967	42.1156	59.2395	71.332	Gm11696	ENSMUSG00000056687	predicted gene 11696 [Source:MGI Symbol;Acc:MGI:3701776]
ENSMUST00000145701	74.901	-0.433837	0.201938	-2.14837	0.0316846	0.180634	62.907	55.3025	72.9182	84.2313	88.2785	85.7683	Inpp5e	ENSMUSG00000026925	inositol polyphosphate-5-phosphatase E [Source:MGI Symbol;Acc:MGI:1927753]
ENSMUST00000155508	281.771	0.274502	0.12809	2.14305	0.0321092	0.182596	332.508	337.255	255.214	263.842	255.543	246.265	Gm12333	ENSMUSG00000085765	predicted gene 12333 [Source:MGI Symbol;Acc:MGI:3652064]
ENSMUST00000062202	103.977	-0.376767	0.176184	-2.13849	0.0324771	0.184226	85.3737	104.259	81.8107	111.483	125.448	115.49	Sned1	ENSMUSG00000047793	sushi, nidogen and EGF-like domains 1 [Source:MGI Symbol;Acc:MGI:3045960]
ENSMUST00000051283	475.334	0.241069	0.113085	2.13175	0.033027	0.185951	476.296	488.657	582.457	412.486	399.576	492.531	4922502D21Rik	ENSMUSG00000047720	RIKEN cDNA 4922502D21 gene [Source:MGI Symbol;Acc:MGI:2685920]
ENSMUST00000107884	111.57	-0.368598	0.172864	-2.1323	0.032982	0.185951	97.0564	95.1929	98.7064	133.779	139.387	105.3	Msmp	ENSMUSG00000078719	microseminoprotein, prostate associated [Source:MGI Symbol;Acc:MGI:3652339]
ENSMUST00000201542	138.731	-0.355542	0.166747	-2.13223	0.0329878	0.185951	103.347	142.336	118.27	167.224	169.588	131.625	Gm17130	ENSMUSG00000106894	predicted gene 17130 [Source:MGI Symbol;Acc:MGI:4937957]
ENSMUST00000043062	718.959	0.204484	0.0959705	2.1307	0.0331139	0.185979	837.561	701.707	771.866	609.438	693.451	699.733	Acsbg2	ENSMUSG00000024207	acyl-CoA synthetase bubblegum family member 2 [Source:MGI Symbol;Acc:MGI:3587728]
ENSMUST00000024928	67.5264	0.520391	0.245142	2.12282	0.033769	0.187799	108.739	53.4893	76.4752	61.9348	47.6239	56.8958	Prss21	ENSMUSG00000024116	protease, serine 21 [Source:MGI Symbol;Acc:MGI:1916698]
ENSMUST00000043767	220.957	0.293881	0.138375	2.1238	0.0336869	0.187799	267.804	243.875	217.865	179.611	232.312	184.274	Upf3a	ENSMUSG00000038398	UPF3 regulator of nonsense transcripts homolog A (yeast) [Source:MGI Symbol;Acc:MGI:1914281]
ENSMUST00000179443	311.018	0.252915	0.118999	2.12536	0.0335563	0.187799	362.164	337.255	313.015	303.48	299.682	250.511	Gfy	ENSMUSG00000095276	golgi-associated olfactory signaling regulator [Source:MGI Symbol;Acc:MGI:2685427]
ENSMUST00000225127	74.7583	0.45175	0.212675	2.12413	0.0336591	0.187799	82.6777	77.9675	99.5956	61.9348	49.947	76.4272	2610318M16Rik	ENSMUSG00000114532	RIKEN cDNA 2610318M16 gene [Source:MGI Symbol;Acc:MGI:1925643]
ENSMUST00000214237	164.937	0.346341	0.163261	2.12139	0.0338887	0.188003	230.958	167.721	154.729	141.211	159.134	135.871	Gm29825	ENSMUSG00000111734	predicted gene, 29825 [Source:MGI Symbol;Acc:MGI:5588984]
ENSMUST00000196660	911.334	0.175825	0.0830805	2.11632	0.0343178	0.18992	946.3	1025.36	928.374	834.881	893.239	839.85	Gm36266	ENSMUSG00000106617	predicted gene, 36266 [Source:MGI Symbol;Acc:MGI:5595425]
ENSMUST00000139127	920.186	-0.187807	0.0888587	-2.11355	0.0345539	0.190761	858.231	943.769	778.98	1010.78	953.64	975.72	1700022I11Rik	ENSMUSG00000028451	RIKEN cDNA 1700022I11 gene [Source:MGI Symbol;Acc:MGI:1914567]
ENSMUST00000236447	106.026	-0.362743	0.171912	-2.11005	0.0348544	0.191953	92.5631	92.4731	92.4817	123.87	127.771	106.998	Gm50335	ENSMUSG00000118026	predicted gene, 50335 [Source:MGI Symbol;Acc:MGI:6303206]
ENSMUST00000019987	109.182	-0.357504	0.169509	-2.10906	0.0349393	0.191955	100.651	91.5665	94.2602	127.586	128.933	112.093	Traf3ip2	ENSMUSG00000019842	TRAF3 interacting protein 2 [Source:MGI Symbol;Acc:MGI:2143599]
ENSMUST00000008036	143.68	0.346512	0.164759	2.10314	0.0354536	0.192041	169.849	145.962	168.957	112.721	109.187	155.402	Rplp1	ENSMUSG00000007892	ribosomal protein, large, P1 [Source:MGI Symbol;Acc:MGI:1927099]
ENSMUST00000010421	331.25	0.249215	0.118666	2.10014	0.0357167	0.192041	376.543	327.282	377.93	282.423	281.097	342.224	2610507B11Rik	ENSMUSG00000010277	RIKEN cDNA 2610507B11 gene [Source:MGI Symbol;Acc:MGI:1919753]
ENSMUST00000034742	226.563	0.455355	0.216425	2.10399	0.0353792	0.192041	329.812	237.529	219.644	175.895	176.557	219.94	Ccnb2	ENSMUSG00000032218	cyclin B2 [Source:MGI Symbol;Acc:MGI:88311]
ENSMUST00000066469	264.378	-0.250603	0.118896	-2.10776	0.035052	0.192041	239.945	223.93	260.549	287.377	285.743	288.725	Cope	ENSMUSG00000055681	coatomer protein complex, subunit epsilon [Source:MGI Symbol;Acc:MGI:1891702]
ENSMUST00000106113	110.179	0.361005	0.171653	2.10311	0.0354563	0.192041	120.422	118.764	133.387	82.9926	101.056	104.45	Foxk2	ENSMUSG00000039275	forkhead box K2 [Source:MGI Symbol;Acc:MGI:1916087]
ENSMUST00000134620	74.6717	-0.451881	0.215082	-2.10097	0.0356436	0.192041	45.8322	70.7147	72.9182	91.6635	74.3398	92.5618	Xirp2	ENSMUSG00000027022	xin actin-binding repeat containing 2 [Source:MGI Symbol;Acc:MGI:2685198]
ENSMUST00000137176	139.202	-0.329161	0.156636	-2.10143	0.0356029	0.192041	115.03	123.297	130.719	175.895	151.003	139.267	Gm14232	ENSMUSG00000087405	predicted gene 14232 [Source:MGI Symbol;Acc:MGI:3701956]
ENSMUST00000180618	88.219	0.437644	0.208241	2.10163	0.0355859	0.192041	133.003	79.7807	91.5924	80.5152	69.6935	74.7288	Mospd4	ENSMUSG00000046487	motile sperm domain containing 4 [Source:MGI Symbol;Acc:MGI:1919326]
ENSMUST00000211177	657.415	-0.190288	0.0903246	-2.10671	0.0351424	0.192041	585.933	660.004	595.795	729.592	685.32	687.844	Gm45290	ENSMUSG00000109709	predicted gene 45290 [Source:MGI Symbol;Acc:MGI:5791126]
ENSMUST00000019944	98.5498	0.374719	0.178804	2.09569	0.0361093	0.193693	112.334	120.578	100.485	90.4248	85.9553	81.5223	Adat2	ENSMUSG00000019808	adenosine deaminase, tRNA-specific 2 [Source:MGI Symbol;Acc:MGI:1914007]
ENSMUST00000191917	217.792	0.27009	0.129089	2.09228	0.0364136	0.194864	236.35	239.342	238.318	218.01	177.718	197.012	Gm37026	ENSMUSG00000104076	predicted gene, 37026 [Source:MGI Symbol;Acc:MGI:5610254]
ENSMUST00000084141	87.6248	-0.401698	0.192202	-2.08998	0.0366198	0.195048	70.0963	81.5939	73.8075	109.005	108.025	83.2207	Zfp820	ENSMUSG00000069743	zinc finger protein 820 [Source:MGI Symbol;Acc:MGI:1922674]
ENSMUST00000204813	219.909	-0.268237	0.128288	-2.0909	0.0365369	0.195048	188.721	212.144	197.413	229.159	260.189	231.829	Gm16042	ENSMUSG00000107724	predicted gene 16042 [Source:MGI Symbol;Acc:MGI:3801935]
ENSMUST00000022953	66.9603	0.463506	0.221933	2.08849	0.0367533	0.1953	76.387	75.2477	82.6999	40.8769	56.9164	69.6336	Fam135b	ENSMUSG00000036800	family with sequence similarity 135, member B [Source:MGI Symbol;Acc:MGI:1917613]
ENSMUST00000220823	97.7993	-0.375816	0.180132	-2.08633	0.0369484	0.195879	97.9551	79.7807	77.3645	115.199	110.348	106.149	Gm16133	ENSMUSG00000089854	predicted gene 16133 [Source:MGI Symbol;Acc:MGI:3802155]
ENSMUST00000057072	333.346	0.234342	0.112969	2.07439	0.0380431	0.200916	364.86	349.041	369.037	304.719	275.289	337.129	Prdx6b	ENSMUSG00000050114	peroxiredoxin 6B [Source:MGI Symbol;Acc:MGI:1336888]
ENSMUST00000139638	164.01	-0.295696	0.142636	-2.07309	0.0381643	0.200916	144.686	154.122	143.169	167.224	193.98	180.878	Slc25a11	ENSMUSG00000014606	solute carrier family 25 (mitochondrial carrier oxoglutarate carrier), member 11 [Source:MGI Symbol;Acc:MGI:1915113]
ENSMUST00000155945	85.7601	-0.439641	0.212031	-2.07348	0.0381277	0.200916	57.5149	92.4731	67.5828	122.631	89.44	84.9191	Traf3ip2	ENSMUSG00000019842	TRAF3 interacting protein 2 [Source:MGI Symbol;Acc:MGI:2143599]
ENSMUST00000236338	183.338	-0.306934	0.148298	-2.0697	0.03848	0.202109	137.497	197.639	156.507	199.43	210.242	198.711	Gm50301	ENSMUSG00000118340	predicted gene, 50301 [Source:MGI Symbol;Acc:MGI:6303149]
ENSMUST00000218353	94.6899	0.373482	0.180691	2.06697	0.038737	0.202521	104.246	106.979	110.267	76.7991	78.986	90.8634	Gm6721	ENSMUSG00000112318	predicted gene 6721 [Source:MGI Symbol;Acc:MGI:3645077]
ENSMUST00000221827	89.025	-0.389744	0.188498	-2.06763	0.038675	0.202521	72.7923	71.6213	86.2569	99.0956	112.671	91.7126	Gm19221	ENSMUSG00000113491	predicted gene, 19221 [Source:MGI Symbol;Acc:MGI:5011406]
ENSMUST00000030134	111.433	0.404343	0.195782	2.06528	0.0388969	0.20289	116.827	117.858	148.504	75.5604	82.4707	127.379	Rad23b	ENSMUSG00000028426	RAD23 homolog B, nucleotide excision repair protein [Source:MGI Symbol;Acc:MGI:105128]
ENSMUST00000202914	155.118	-0.335377	0.162493	-2.06395	0.0390225	0.203078	149.179	143.243	117.381	196.953	184.688	139.267	Gm43791	ENSMUSG00000107040	predicted gene 43791 [Source:MGI Symbol;Acc:MGI:5663928]
ENSMUST00000202446	62.4397	-0.474688	0.231566	-2.0499	0.0403739	0.20963	48.5282	56.2091	51.5763	61.9348	95.2478	61.1417	Gm42727	ENSMUSG00000106767	predicted gene 42727 [Source:MGI Symbol;Acc:MGI:5662864]
ENSMUST00000070368	146.297	0.320625	0.156533	2.04829	0.0405315	0.209746	153.673	165.001	167.178	132.54	149.841	109.546	Siah2	ENSMUSG00000036432	siah E3 ubiquitin protein ligase 2 [Source:MGI Symbol;Acc:MGI:108062]
ENSMUST00000121220	91.3732	-0.371396	0.181396	-2.04743	0.0406156	0.209746	80.8804	83.4071	74.6967	102.812	104.54	101.903	Gm13862	ENSMUSG00000082118	predicted gene 13862 [Source:MGI Symbol;Acc:MGI:3651503]
ENSMUST00000193462	95.5176	0.385943	0.188555	2.04684	0.0406736	0.209746	116.827	112.418	96.9279	75.5604	72.0166	99.3553	Gm20731	ENSMUSG00000102912	predicted gene, 20731 [Source:MGI Symbol;Acc:MGI:5313040]
ENSMUST00000166593	388.16	-0.223659	0.109361	-2.04514	0.0408411	0.210132	334.306	390.744	347.695	443.453	429.777	382.985	Gm17134	ENSMUSG00000090860	predicted gene 17134 [Source:MGI Symbol;Acc:MGI:4937961]
ENSMUST00000021682	487.994	0.217819	0.107231	2.0313	0.0422245	0.216759	589.528	468.712	517.542	419.918	454.169	478.094	Angel1	ENSMUSG00000021257	angel homolog 1 [Source:MGI Symbol;Acc:MGI:1915987]
ENSMUST00000032909	77.5283	0.419157	0.206668	2.02817	0.0425429	0.217665	103.347	70.7147	92.4817	61.9348	66.2088	70.4828	Pde3b	ENSMUSG00000030671	phosphodiesterase 3B, cGMP-inhibited [Source:MGI Symbol;Acc:MGI:1333863]
ENSMUST00000166032	10953	-0.158862	0.0783466	-2.02768	0.0425929	0.217665	10186.4	10958.1	9905.32	11777.5	11996.6	10894.3	Tdrkh	ENSMUSG00000041912	tudor and KH domain containing protein [Source:MGI Symbol;Acc:MGI:1919884]
ENSMUST00000030795	378.953	0.225665	0.111638	2.0214	0.0432381	0.220057	445.741	371.705	409.943	320.822	348.468	377.041	Abcf2	ENSMUSG00000028953	ATP-binding cassette, sub-family F (GCN20), member 2 [Source:MGI Symbol;Acc:MGI:1351657]
ENSMUST00000040461	121.181	0.383969	0.189967	2.02124	0.043255	0.220057	107.84	132.363	170.735	128.824	87.1169	100.204	Flvcr2	ENSMUSG00000034258	feline leukemia virus subgroup C cellular receptor 2 [Source:MGI Symbol;Acc:MGI:2384974]
ENSMUST00000044195	149.829	0.304486	0.150891	2.01793	0.0435988	0.22131	161.761	155.935	177.849	139.973	142.872	120.585	Tmc7	ENSMUSG00000042246	transmembrane channel-like gene family 7 [Source:MGI Symbol;Acc:MGI:2443317]
ENSMUST00000001599	357.652	0.253338	0.125949	2.01143	0.0442795	0.222541	462.815	331.815	373.484	319.583	306.651	351.565	Klhl10	ENSMUSG00000001558	kelch-like 10 [Source:MGI Symbol;Acc:MGI:2181067]
ENSMUST00000087445	1398.81	0.174707	0.0867754	2.01333	0.0440801	0.222541	1609.52	1394.35	1449.47	1208.97	1305.59	1424.94	Tuba3b	ENSMUSG00000067338	tubulin, alpha 3B [Source:MGI Symbol;Acc:MGI:1095408]
ENSMUST00000109832	389.436	0.230968	0.114807	2.01179	0.0442416	0.222541	462.815	368.079	432.174	356.744	328.721	388.08	Ppp2r5c	ENSMUSG00000017843	protein phosphatase 2, regulatory subunit B', gamma [Source:MGI Symbol;Acc:MGI:1349475]
ENSMUST00000125652	203.82	-0.281694	0.140145	-2.01001	0.0444298	0.222541	216.58	172.254	163.621	206.862	233.473	230.131	Diablo	ENSMUSG00000029433	diablo, IAP-binding mitochondrial protein [Source:MGI Symbol;Acc:MGI:1913843]
ENSMUST00000146981	111.039	-0.366394	0.182243	-2.01047	0.0443811	0.222541	84.4751	120.578	85.3677	126.347	138.225	111.244	4930599N23Rik	ENSMUSG00000073144	RIKEN cDNA 4930599N23 gene [Source:MGI Symbol;Acc:MGI:1922629]
ENSMUST00000181819	473.934	-0.196547	0.0976356	-2.01306	0.0441078	0.222541	461.917	442.42	419.724	532.639	499.47	487.435	Gm16740	ENSMUSG00000097167	predicted gene, 16740 [Source:MGI Symbol;Acc:MGI:4439664]
ENSMUST00000192053	181.991	-0.295215	0.147252	-2.00483	0.0449812	0.224807	165.355	166.814	159.175	159.792	227.666	213.147	Gm37401	ENSMUSG00000104208	predicted gene, 37401 [Source:MGI Symbol;Acc:MGI:5610629]
ENSMUST00000042834	144.177	0.346907	0.174275	1.99057	0.0465281	0.231011	196.809	150.495	138.722	100.334	130.095	148.608	Uqcrfs1	ENSMUSG00000038462	ubiquinol-cytochrome c reductase, Rieske iron-sulfur polypeptide 1 [Source:MGI Symbol;Acc:MGI:1913944]
ENSMUST00000099278	89.0502	0.373798	0.187667	1.99181	0.0463916	0.231011	110.537	87.9401	103.153	75.5604	78.986	78.1255	Kiz	ENSMUSG00000074749	kizuna centrosomal protein [Source:MGI Symbol;Acc:MGI:2684960]
ENSMUST00000121027	76.1597	-0.407909	0.204884	-1.99093	0.0464887	0.231011	67.4003	56.2091	72.029	101.573	82.4707	77.2764	Gm6305	ENSMUSG00000081052	predicted gene 6305 [Source:MGI Symbol;Acc:MGI:3644967]
ENSMUST00000050178	612.591	0.1842	0.0927301	1.98641	0.0469875	0.232783	645.246	607.421	701.616	571.039	588.91	561.315	Ccdc60	ENSMUSG00000043913	coiled-coil domain containing 60 [Source:MGI Symbol;Acc:MGI:2141043]
ENSMUST00000154460	368.337	-0.247295	0.124634	-1.98418	0.047236	0.233505	290.271	397.997	322.797	424.873	355.437	418.651	Ap3m1	ENSMUSG00000021824	adaptor-related protein complex 3, mu 1 subunit [Source:MGI Symbol;Acc:MGI:1929212]
ENSMUST00000004120	88.8738	-0.416796	0.210199	-1.98286	0.0473828	0.233721	56.6163	92.4731	78.2537	125.108	97.5709	83.2207	Fancl	ENSMUSG00000004018	Fanconi anemia, complementation group L [Source:MGI Symbol;Acc:MGI:1914280]
ENSMUST00000082426	107.855	-0.332138	0.167988	-1.97715	0.0480241	0.23637	95.2591	92.4731	98.7064	120.153	120.802	119.736	Dio1	ENSMUSG00000034785	deiodinase, iodothyronine, type I [Source:MGI Symbol;Acc:MGI:94896]
ENSMUST00000064910	223.021	0.289523	0.146593	1.97501	0.048267	0.237052	283.98	202.172	251.657	175.895	195.142	229.281	Strap	ENSMUSG00000030224	serine/threonine kinase receptor associated protein [Source:MGI Symbol;Acc:MGI:1329037]
ENSMUST00000023464	152.43	-0.300644	0.152426	-1.9724	0.0485643	0.237996	116.827	147.776	145.836	168.463	155.649	180.028	Meltf	ENSMUSG00000022780	melanotransferrin [Source:MGI Symbol;Acc:MGI:1353421]
ENSMUST00000190995	185.084	0.286254	0.145274	1.97044	0.0487879	0.238577	228.262	174.974	208.084	149.882	168.426	180.878	Ace3	ENSMUSG00000101605	angiotensin I converting enzyme (peptidyl-dipeptidase A) 3 [Source:MGI Symbol;Acc:MGI:3644400]
ENSMUST00000031914	88.4679	0.400989	0.203807	1.9675	0.0491259	0.239713	115.03	96.0995	92.4817	74.3217	56.9164	95.9585	Ccdc184	ENSMUSG00000029875	coiled-coil domain containing 184 [Source:MGI Symbol;Acc:MGI:2146066]
ENSMUST00000032992	522.749	0.21452	0.109193	1.9646	0.0494605	0.240828	610.197	530.36	545.997	502.91	411.192	535.839	Eif3c	ENSMUSG00000030738	eukaryotic translation initiation factor 3, subunit C [Source:MGI Symbol;Acc:MGI:1926966]
ENSMUST00000105738	72.2786	0.415594	0.211837	1.96186	0.0497785	0.241341	81.779	79.7807	85.3677	79.2765	52.2701	55.1974	Zfp980	ENSMUSG00000058186	zinc finger protein 980 [Source:MGI Symbol;Acc:MGI:3712454]
ENSMUST00000212751	166.876	-0.283518	0.144512	-1.9619	0.0497744	0.241341	168.051	141.429	141.39	194.475	183.526	172.386	Gm29773	ENSMUSG00000110547	predicted gene, 29773 [Source:MGI Symbol;Acc:MGI:5588932]
ENSMUST00000035090	77.5088	-0.401999	0.20562	-1.95506	0.050576	0.244164	55.7176	72.5279	72.9182	73.083	90.6016	100.204	Fbxl2	ENSMUSG00000032507	F-box and leucine-rich repeat protein 2 [Source:MGI Symbol;Acc:MGI:1919429]
ENSMUST00000160835	381.002	0.226083	0.11561	1.95557	0.0505156	0.244164	370.252	466.898	393.936	353.028	377.507	324.391	Pip4p1	ENSMUSG00000035953	phosphatidylinositol-4,5-bisphosphate 4-phosphatase 1 [Source:MGI Symbol;Acc:MGI:2448501]
ENSMUST00000200146	83.7069	-0.385775	0.197488	-1.9534	0.0507718	0.244589	61.1096	77.9675	79.143	79.2765	104.54	100.204	Chil5	ENSMUSG00000043873	chitinase-like 5 [Source:MGI Symbol;Acc:MGI:2676649]
ENSMUST00000045550	83.3987	0.38992	0.199743	1.9521	0.0509258	0.244811	111.435	85.2203	88.0354	70.6056	62.7242	82.3715	Xkr8	ENSMUSG00000037752	X-linked Kx blood group related 8 [Source:MGI Symbol;Acc:MGI:2685877]
ENSMUST00000111751	141.309	-0.302681	0.15528	-1.94926	0.0512648	0.245451	110.537	143.243	126.273	151.121	154.487	162.195	Myl2	ENSMUSG00000013936	myosin, light polypeptide 2, regulatory, cardiac, slow [Source:MGI Symbol;Acc:MGI:97272]
ENSMUST00000204151	80.0881	-0.388181	0.199152	-1.94917	0.0512754	0.245451	71.8937	58.9289	77.3645	99.0956	78.986	94.2602	Gm44415	ENSMUSG00000108195	predicted gene, 44415 [Source:MGI Symbol;Acc:MGI:5690807]
ENSMUST00000030851	67.0193	0.690501	0.354575	1.9474	0.0514865	0.245943	91.6644	90.6599	66.6935	53.2639	30.2005	69.6336	Tomm7	ENSMUSG00000028998	translocase of outer mitochondrial membrane 7 [Source:MGI Symbol;Acc:MGI:1913419]
ENSMUST00000139147	1098.03	-0.159479	0.0821259	-1.94189	0.0521505	0.248325	1028.08	1039.87	1041.31	1247.37	1161.56	1069.98	Rad54l	ENSMUSG00000028702	RAD54 like (S. cerevisiae) [Source:MGI Symbol;Acc:MGI:894697]
ENSMUST00000197177	80.7789	-0.389367	0.200555	-1.94145	0.0522041	0.248325	59.3123	72.5279	77.3645	107.767	83.6322	84.0699	Ubap2l	ENSMUSG00000042520	ubiquitin-associated protein 2-like [Source:MGI Symbol;Acc:MGI:1921633]
ENSMUST00000043503	179.421	-0.270378	0.139426	-1.93923	0.0524736	0.24875	157.267	167.721	161.843	218.01	191.657	180.028	Scube3	ENSMUSG00000038677	signal peptide, CUB domain, EGF-like 3 [Source:MGI Symbol;Acc:MGI:3045253]
ENSMUST00000208084	174.884	-0.277736	0.143243	-1.93891	0.0525126	0.24875	146.483	158.655	168.068	191.998	212.565	171.537	Pstk	ENSMUSG00000063179	phosphoseryl-tRNA kinase [Source:MGI Symbol;Acc:MGI:2685945]
ENSMUST00000043285	115.254	0.348946	0.180192	1.93652	0.0528038	0.249063	153.673	108.792	125.384	84.2313	114.994	104.45	Gm11992	ENSMUSG00000040978	predicted gene 11992 [Source:MGI Symbol;Acc:MGI:3651127]
ENSMUST00000062085	77.8854	0.420274	0.217162	1.9353	0.052954	0.249063	77.2857	72.5279	117.381	64.4122	72.0166	63.6893	Hsfy2	ENSMUSG00000045336	heat shock transcription factor, Y-linked 2 [Source:MGI Symbol;Acc:MGI:1918316]
ENSMUST00000202708	72.2747	0.418751	0.216427	1.93483	0.0530107	0.249063	98.8538	71.6213	78.2537	65.6509	48.7855	70.4828	Gm10459	ENSMUSG00000106834	predicted gene 10459 [Source:MGI Symbol;Acc:MGI:3642067]
ENSMUST00000223396	935.002	-0.177407	0.0916941	-1.93478	0.0530179	0.249063	789.932	979.127	863.459	1033.07	955.963	988.458	Gdi2	ENSMUSG00000021218	guanosine diphosphate (GDP) dissociation inhibitor 2 [Source:MGI Symbol;Acc:MGI:99845]
ENSMUST00000042575	245.007	0.241771	0.125045	1.93347	0.0531783	0.249145	271.399	287.392	238.318	219.249	221.858	231.829	Topors	ENSMUSG00000036822	topoisomerase I binding, arginine/serine-rich [Source:MGI Symbol;Acc:MGI:2146189]
ENSMUST00000162726	534.045	0.430459	0.222707	1.93285	0.0532549	0.249145	785.438	554.838	499.757	444.692	410.03	509.514	Znhit2	ENSMUSG00000075227	zinc finger, HIT domain containing 2 [Source:MGI Symbol;Acc:MGI:1352481]
ENSMUST00000038377	72.0127	0.42336	0.219257	1.93088	0.0534975	0.249765	78.1844	94.2863	76.4752	43.3543	65.0473	74.7288	Btg1	ENSMUSG00000036478	B cell translocation gene 1, anti-proliferative [Source:MGI Symbol;Acc:MGI:88215]
ENSMUST00000044987	77.574	0.404036	0.209624	1.92743	0.0539259	0.249863	87.1711	96.0995	83.5892	53.2639	60.4011	84.9191	Hypm	ENSMUSG00000040456	huntingtin interacting protein M [Source:MGI Symbol;Acc:MGI:1914584]
ENSMUST00000075995	253.489	0.234648	0.121672	1.92852	0.0537904	0.249863	296.561	271.98	253.435	235.352	233.473	230.131	Cand2	ENSMUSG00000030319	cullin-associated and neddylation-dissociated 2 (putative) [Source:MGI Symbol;Acc:MGI:1914338]
ENSMUST00000120301	68.1743	-0.423001	0.219494	-1.92717	0.0539589	0.249863	44.0349	63.4619	67.5828	80.5152	68.532	84.9191	Farp2	ENSMUSG00000034066	FERM, RhoGEF and pleckstrin domain protein 2 [Source:MGI Symbol;Acc:MGI:2385126]
ENSMUST00000153430	109.592	0.33585	0.174241	1.92751	0.0539161	0.249863	132.105	130.55	104.042	92.9022	104.54	93.411	Ube4b	ENSMUSG00000028960	ubiquitination factor E4B [Source:MGI Symbol;Acc:MGI:1927086]
ENSMUST00000178832	1139.36	-0.176129	0.0914831	-1.92526	0.0541971	0.249946	972.362	1174.95	1059.98	1298.15	1220.8	1109.89	Gm21958	ENSMUSG00000094487	predicted gene, 21958 [Source:MGI Symbol;Acc:MGI:5439427]
ENSMUST00000205388	129.321	-0.323399	0.16793	-1.9258	0.0541295	0.249946	125.814	125.111	93.3709	162.269	130.095	139.267	Gm44684	ENSMUSG00000108520	predicted gene 44684 [Source:MGI Symbol;Acc:MGI:5753260]
ENSMUST00000027863	391.223	-0.201026	0.104699	-1.92004	0.0548524	0.249965	381.935	370.799	339.692	432.305	393.768	428.841	Atp1b1	ENSMUSG00000026576	ATPase, Na+/K+ transporting, beta 1 polypeptide [Source:MGI Symbol;Acc:MGI:88108]
ENSMUST00000073617	83.1327	0.386485	0.201223	1.92068	0.054772	0.249965	83.5764	91.5665	108.488	56.98	76.6629	81.5223	Glipr1l1	ENSMUSG00000020213	GLI pathogenesis-related 1 like 1 [Source:MGI Symbol;Acc:MGI:1916536]
ENSMUST00000091852	137.09	0.539643	0.281069	1.91997	0.0548623	0.249965	138.395	157.748	191.188	139.973	75.5013	119.736	Mex3c	ENSMUSG00000037253	mex3 RNA binding family member C [Source:MGI Symbol;Acc:MGI:2652843]
ENSMUST00000181498	94.6428	-0.356181	0.185335	-1.92182	0.0546285	0.249965	78.1844	97.9127	72.9182	113.96	98.7325	106.149	Gm16861	ENSMUSG00000097397	predicted gene, 16861 [Source:MGI Symbol;Acc:MGI:4439785]
ENSMUST00000185891	187.373	-0.261716	0.136088	-1.92314	0.0544627	0.249965	157.267	187.666	166.289	205.623	204.434	202.957	Ica1l	ENSMUSG00000026018	islet cell autoantigen 1-like [Source:MGI Symbol;Acc:MGI:1917625]
ENSMUST00000196029	107.503	-0.337355	0.175512	-1.92212	0.0545904	0.249965	91.6644	88.8467	104.042	138.734	104.54	117.188	Tmem243	ENSMUSG00000079659	transmembrane protein 243, mitochondrial [Source:MGI Symbol;Acc:MGI:3606159]
ENSMUST00000057860	216.906	0.278837	0.145506	1.91633	0.0553236	0.251561	221.972	257.474	236.54	152.36	202.111	230.98	Pdha2	ENSMUSG00000047674	pyruvate dehydrogenase E1 alpha 2 [Source:MGI Symbol;Acc:MGI:97533]
ENSMUST00000208082	113.466	0.349671	0.182669	1.91423	0.0555907	0.25227	115.03	155.028	110.267	113.96	99.894	86.6174	Gm45089	ENSMUSG00000109140	predicted gene 45089 [Source:MGI Symbol;Acc:MGI:5753665]
ENSMUST00000030769	373.218	0.379159	0.198223	1.91279	0.0557744	0.252599	522.128	349.947	394.826	301.003	302.005	369.398	Psmc2	ENSMUSG00000028932	proteasome (prosome, macropain) 26S subunit, ATPase 2 [Source:MGI Symbol;Acc:MGI:109555]
ENSMUST00000046937	1337.49	0.142244	0.0744337	1.91102	0.0560023	0.253126	1459.44	1358.99	1390.78	1278.33	1291.65	1245.76	Tssk1	ENSMUSG00000041566	testis-specific serine kinase 1 [Source:MGI Symbol;Acc:MGI:1347557]
ENSMUST00000139695	78.4648	-0.388827	0.203691	-1.9089	0.0562749	0.253852	54.8189	73.4345	75.586	79.2765	101.056	86.6174	Gm14798	ENSMUSG00000087640	predicted gene 14798 [Source:MGI Symbol;Acc:MGI:3705098]
ENSMUST00000094151	98.809	0.368888	0.193619	1.90522	0.0567509	0.25398	126.713	102.446	105.82	61.9348	103.379	92.5618	Rnf187	ENSMUSG00000020496	ring finger protein 187 [Source:MGI Symbol;Acc:MGI:1914224]
ENSMUST00000153758	237.127	-0.24905	0.130684	-1.90574	0.0566835	0.25398	197.708	245.688	208.084	237.83	253.22	280.233	Erp29	ENSMUSG00000029616	endoplasmic reticulum protein 29 [Source:MGI Symbol;Acc:MGI:1914647]
ENSMUST00000195518	97.3828	-0.36731	0.192693	-1.9062	0.0566246	0.25398	81.779	74.3411	97.8171	113.96	128.933	87.4666	Gm15853	ENSMUSG00000103400	predicted gene 15853 [Source:MGI Symbol;Acc:MGI:3801970]
ENSMUST00000201771	87.4459	-0.361008	0.189339	-1.90668	0.0565626	0.25398	80.8804	77.0609	71.1397	96.6182	111.51	87.4666	Gm42846	ENSMUSG00000106702	predicted gene 42846 [Source:MGI Symbol;Acc:MGI:5662983]
ENSMUST00000141656	158.512	0.299886	0.15748	1.90428	0.0568742	0.254031	176.139	190.386	156.507	172.179	133.579	122.283	Gm15935	ENSMUSG00000084940	predicted gene 15935 [Source:MGI Symbol;Acc:MGI:3801894]
ENSMUST00000132370	180.603	0.279119	0.14728	1.89515	0.058072	0.258871	171.646	228.463	194.745	146.166	171.911	170.687	4933439K11Rik	ENSMUSG00000085184	RIKEN cDNA 4933439K11 gene [Source:MGI Symbol;Acc:MGI:1918569]
ENSMUST00000227439	403.83	0.199831	0.105548	1.89327	0.0583226	0.259478	434.957	460.552	398.383	390.189	385.637	353.263	Gm49685	ENSMUSG00000115122	predicted gene, 49685 [Source:MGI Symbol;Acc:MGI:6215134]
ENSMUST00000024970	76.2915	-0.38033	0.201151	-1.89077	0.0586555	0.260449	62.907	70.7147	65.8043	89.1861	73.1782	95.9585	Gtf2a1l	ENSMUSG00000024154	general transcription factor IIA, 1-like [Source:MGI Symbol;Acc:MGI:1919078]
ENSMUST00000116724	273.637	0.240759	0.127491	1.88845	0.0589657	0.260805	309.143	325.469	253.435	257.649	265.997	230.131	Gm22953	ENSMUSG00000080374	predicted gene, 22953 [Source:MGI Symbol;Acc:MGI:5452730]
ENSMUST00000169995	75.5114	-0.414945	0.219722	-1.8885	0.058959	0.260805	53.9202	71.6213	67.5828	113.96	75.5013	70.4828	Phykpl	ENSMUSG00000020359	5-phosphohydroxy-L-lysine phospholyase [Source:MGI Symbol;Acc:MGI:1920197]
ENSMUST00000025075	70.1899	0.426077	0.22579	1.88705	0.059154	0.261129	99.7525	78.8741	64.0258	52.0252	53.4317	73.0304	Bambi	ENSMUSG00000024232	BMP and activin membrane-bound inhibitor [Source:MGI Symbol;Acc:MGI:1915260]
ENSMUST00000033930	79.1116	0.389023	0.206322	1.88551	0.059361	0.261532	106.942	82.5005	80.0322	75.5604	55.7548	73.8796	Dusp4	ENSMUSG00000031530	dual specificity phosphatase 4 [Source:MGI Symbol;Acc:MGI:2442191]
ENSMUST00000037315	230.36	0.256264	0.135983	1.88453	0.0594932	0.261532	283.081	228.463	242.764	193.236	195.142	239.472	Abhd2	ENSMUSG00000039202	abhydrolase domain containing 2 [Source:MGI Symbol;Acc:MGI:1914344]
ENSMUST00000216224	102.687	0.341327	0.18119	1.88381	0.0595911	0.261532	123.118	105.165	116.491	73.083	105.702	92.5618	Usp44	ENSMUSG00000020020	ubiquitin specific peptidase 44 [Source:MGI Symbol;Acc:MGI:3045318]
ENSMUST00000224511	147.473	-0.285776	0.151797	-1.88262	0.0597524	0.261734	132.105	145.962	120.048	175.895	157.972	152.854	Cdc37l1	ENSMUSG00000024780	cell division cycle 37-like 1 [Source:MGI Symbol;Acc:MGI:1914322]
ENSMUST00000172939	115.14	0.350231	0.186311	1.87982	0.0601327	0.262892	148.281	109.698	130.719	100.334	77.8244	123.982	Ttc6	ENSMUSG00000046782	tetratricopeptide repeat domain 6 [Source:MGI Symbol;Acc:MGI:2684915]
ENSMUST00000065716	1303.52	-0.1458	0.0776307	-1.87812	0.0603652	0.262896	1190.74	1224.81	1296.52	1441.84	1319.53	1347.67	Eml5	ENSMUSG00000051166	echinoderm microtubule associated protein like 5 [Source:MGI Symbol;Acc:MGI:2442513]
ENSMUST00000210912	643.527	-0.16873	0.0898377	-1.87816	0.0603589	0.262896	607.501	638.246	571.786	708.534	657.442	677.654	Gm39214	ENSMUSG00000109754	predicted gene, 39214 [Source:MGI Symbol;Acc:MGI:5622099]
ENSMUST00000198731	164.517	-0.282703	0.150702	-1.8759	0.0606692	0.263714	159.963	151.402	132.498	198.191	190.496	154.553	Gm42585	ENSMUSG00000106457	predicted gene 42585 [Source:MGI Symbol;Acc:MGI:5662722]
ENSMUST00000194858	158.02	-0.279066	0.148857	-1.87472	0.0608313	0.263913	160.862	132.363	134.276	182.088	178.88	159.648	Gm19918	ENSMUSG00000102961	predicted gene, 19918 [Source:MGI Symbol;Acc:MGI:5012103]
ENSMUST00000188123	66.911	-0.432837	0.231024	-1.87356	0.0609911	0.264101	46.7309	57.1157	66.6935	61.9348	101.056	67.9353	Gm28892	ENSMUSG00000101168	predicted gene 28892 [Source:MGI Symbol;Acc:MGI:5579598]
ENSMUST00000066038	719.76	-0.17772	0.0949666	-1.8714	0.0612897	0.264199	606.603	730.719	687.388	801.436	778.244	714.169	Gm16568	ENSMUSG00000089702	predicted gene 16568 [Source:MGI Symbol;Acc:MGI:4414988]
ENSMUST00000102598	81.1925	0.371858	0.198623	1.87217	0.0611824	0.264199	99.7525	87.0335	88.9247	71.8443	58.0779	81.5223	Rbbp4	ENSMUSG00000057236	retinoblastoma binding protein 4, chromatin remodeling factor [Source:MGI Symbol;Acc:MGI:1194912]
ENSMUST00000189454	62.3762	0.420314	0.224662	1.87087	0.0613631	0.264199	83.5764	67.0883	64.0258	44.593	58.0779	56.8958	Gm7356	ENSMUSG00000101307	predicted gene 7356 [Source:MGI Symbol;Acc:MGI:3646178]
ENSMUST00000035840	622.806	0.191967	0.102656	1.87	0.0614832	0.264215	650.638	618.3	726.515	519.013	576.133	646.234	Zdhhc5	ENSMUSG00000034075	zinc finger, DHHC domain containing 5 [Source:MGI Symbol;Acc:MGI:1923573]
ENSMUST00000207826	226.458	0.271146	0.145657	1.86154	0.0626683	0.268798	250.729	223.93	271.22	177.133	183.526	252.21	Zfp654	ENSMUSG00000047141	zinc finger protein 654 [Source:MGI Symbol;Acc:MGI:1919270]
ENSMUST00000189381	198.752	-0.246493	0.132618	-1.85867	0.0630734	0.270026	169.849	192.199	184.074	215.533	203.273	227.583	Gm28192	ENSMUSG00000100629	predicted gene 28192 [Source:MGI Symbol;Acc:MGI:5578898]
ENSMUST00000047357	90.8245	0.346806	0.186677	1.85779	0.0631994	0.270055	106.942	88.8467	109.377	84.2313	73.1782	82.3715	Cpsf2	ENSMUSG00000041781	cleavage and polyadenylation specific factor 2 [Source:MGI Symbol;Acc:MGI:1861601]
ENSMUST00000048377	211.345	0.256572	0.138237	1.85604	0.0634482	0.270609	225.566	199.452	265.885	184.566	190.496	202.107	Suco	ENSMUSG00000040297	SUN domain containing ossification factor [Source:MGI Symbol;Acc:MGI:2138346]
ENSMUST00000029405	427.049	0.215351	0.116228	1.85283	0.0639066	0.270641	462.815	417.942	498.867	361.699	362.406	458.563	Gmps	ENSMUSG00000027823	guanine monophosphate synthetase [Source:MGI Symbol;Acc:MGI:2448526]
ENSMUST00000130528	191.371	-0.261858	0.141343	-1.85265	0.0639329	0.270641	175.241	184.946	160.954	200.669	240.443	185.973	Raf1	ENSMUSG00000000441	v-raf-leukemia viral oncogene 1 [Source:MGI Symbol;Acc:MGI:97847]
ENSMUST00000143428	491.792	-0.18916	0.102069	-1.85326	0.0638456	0.270641	483.485	447.86	445.513	584.664	501.793	487.435	Gm11766	ENSMUSG00000086924	predicted gene 11766 [Source:MGI Symbol;Acc:MGI:3650673]
ENSMUST00000207760	786.015	-0.163798	0.0883032	-1.85495	0.0636029	0.270641	725.227	776.955	720.29	901.77	803.799	788.049	Gm38405	ENSMUSG00000109002	predicted gene, 38405 [Source:MGI Symbol;Acc:MGI:5621290]
ENSMUST00000070216	118.178	0.345944	0.187245	1.84755	0.064668	0.271861	124.017	111.512	162.732	100.334	84.7938	125.68	Spata31	ENSMUSG00000056223	spermatogenesis associated 31 [Source:MGI Symbol;Acc:MGI:1925374]
ENSMUST00000076991	321.634	0.247171	0.133799	1.84732	0.0647004	0.271861	358.57	303.711	387.712	239.068	298.521	342.224	4930453N24Rik	ENSMUSG00000059920	RIKEN cDNA 4930453N24 gene [Source:MGI Symbol;Acc:MGI:1914859]
ENSMUST00000130888	73.4333	-0.400946	0.216893	-1.84859	0.0645165	0.271861	66.5016	74.3411	48.9086	99.0956	68.532	83.2207	Rccd1	ENSMUSG00000038930	RCC1 domain containing 1 [Source:MGI Symbol;Acc:MGI:2444156]
ENSMUST00000191834	131.84	-0.29052	0.15725	-1.8475	0.0646748	0.271861	113.233	123.297	119.159	133.779	161.457	140.116	Gm37756	ENSMUSG00000103380	predicted gene, 37756 [Source:MGI Symbol;Acc:MGI:5610984]
ENSMUST00000036540	137.925	0.288006	0.156189	1.84396	0.0651896	0.272906	159.963	138.71	157.397	113.96	120.802	136.72	Fam117b	ENSMUSG00000041040	family with sequence similarity 117, member B [Source:MGI Symbol;Acc:MGI:1920000]
ENSMUST00000152043	438.837	-0.194682	0.10555	-1.84445	0.0651174	0.272906	380.138	460.552	386.822	465.749	482.047	457.714	Gm17163	ENSMUSG00000092042	predicted gene 17163 [Source:MGI Symbol;Acc:MGI:4937990]
ENSMUST00000014339	119.932	-0.343963	0.186656	-1.84276	0.0653633	0.27313	90.7657	111.512	116.491	97.8569	138.225	164.743	Dnajc7	ENSMUSG00000014195	DnaJ heat shock protein family (Hsp40) member C7 [Source:MGI Symbol;Acc:MGI:1928373]
ENSMUST00000159620	539.607	0.17294	0.0939128	1.84149	0.0655497	0.273405	562.568	603.795	548.665	530.162	494.824	497.626	Manf	ENSMUSG00000032575	mesencephalic astrocyte-derived neurotrophic factor [Source:MGI Symbol;Acc:MGI:1922090]
ENSMUST00000106459	156.512	-0.277338	0.150767	-1.83952	0.0658391	0.274108	120.422	151.402	152.061	184.566	168.426	162.195	Tesk2	ENSMUSG00000033985	testis-specific kinase 2 [Source:MGI Symbol;Acc:MGI:2385204]
ENSMUST00000058679	76.6994	-0.365287	0.198891	-1.83662	0.0662665	0.27517	70.995	67.0883	63.1365	76.7991	96.4094	85.7683	Mtmr9	ENSMUSG00000035078	myotubularin related protein 9 [Source:MGI Symbol;Acc:MGI:2442842]
ENSMUST00000100507	349.722	0.204869	0.111576	1.83614	0.0663367	0.27517	399.908	349.041	376.151	320.822	300.844	351.565	Eif3b	ENSMUSG00000056076	eukaryotic translation initiation factor 3, subunit B [Source:MGI Symbol;Acc:MGI:106478]
ENSMUST00000141116	138.552	-0.281034	0.153274	-1.83354	0.0667229	0.276267	123.118	122.391	129.83	163.508	137.064	155.402	Taf10	ENSMUSG00000043866	TATA-box binding protein associated factor 10 [Source:MGI Symbol;Acc:MGI:1346320]
ENSMUST00000027299	110.035	0.313453	0.171238	1.83051	0.0671733	0.276618	136.598	115.138	114.713	92.9022	96.4094	104.45	Prss39	ENSMUSG00000026125	protease, serine 39 [Source:MGI Symbol;Acc:MGI:1270856]
ENSMUST00000181342	140.972	0.276567	0.151055	1.8309	0.0671154	0.276618	154.571	149.589	159.175	133.779	119.641	129.077	Gm26789	ENSMUSG00000096991	predicted gene, 26789 [Source:MGI Symbol;Acc:MGI:5477283]
ENSMUST00000231324	463.847	0.204986	0.111958	1.83091	0.0671136	0.276618	432.261	574.784	482.861	448.408	419.323	425.445	4930542D17Rik	ENSMUSG00000116848	RIKEN cDNA 4930542D17 gene [Source:MGI Symbol;Acc:MGI:1922461]
ENSMUST00000035849	160.267	0.279525	0.152891	1.82827	0.067509	0.277496	168.051	158.655	201.859	133.779	137.064	162.195	1700028P14Rik	ENSMUSG00000033053	RIKEN cDNA 1700028P14 gene [Source:MGI Symbol;Acc:MGI:1914733]
ENSMUST00000034843	109.822	0.320852	0.175706	1.82608	0.0678382	0.277672	136.598	112.418	118.27	90.4248	88.2785	112.942	Ireb2	ENSMUSG00000032293	iron responsive element binding protein 2 [Source:MGI Symbol;Acc:MGI:1928268]
ENSMUST00000038770	85.733	-0.354275	0.194066	-1.82554	0.067919	0.277672	77.2857	85.2203	64.0258	92.9022	87.1169	107.847	Vasn	ENSMUSG00000039646	vasorin [Source:MGI Symbol;Acc:MGI:2177651]
ENSMUST00000181255	609.351	-0.178283	0.0975964	-1.82674	0.0677395	0.277672	528.418	629.18	557.558	613.154	693.451	634.345	Gm17638	ENSMUSG00000097057	predicted gene, 17638 [Source:MGI Symbol;Acc:MGI:4937272]
ENSMUST00000052919	95.6872	0.340003	0.186877	1.81939	0.0688518	0.28098	98.8538	116.045	106.71	89.1861	67.3704	95.9585	Ormdl3	ENSMUSG00000038150	ORM1-like 3 (S. cerevisiae) [Source:MGI Symbol;Acc:MGI:1913862]
ENSMUST00000174811	646.118	0.173992	0.0957339	1.81745	0.0691483	0.281683	645.246	729.812	678.495	590.858	666.735	565.561	Gm20539	ENSMUSG00000092353	predicted gene 20539 [Source:MGI Symbol;Acc:MGI:5142004]
ENSMUST00000162432	99.2292	-0.354813	0.195463	-1.81525	0.0694862	0.282552	79.083	96.0995	84.4784	132.54	120.802	82.3715	Gm16169	ENSMUSG00000089907	predicted gene 16169 [Source:MGI Symbol;Acc:MGI:3802011]
ENSMUST00000026553	158.963	0.314095	0.173827	1.80694	0.0707721	0.282743	190.518	129.644	208.973	118.915	157.972	147.759	Syce1	ENSMUSG00000025480	synaptonemal complex central element protein 1 [Source:MGI Symbol;Acc:MGI:1921325]
ENSMUST00000040806	772.734	0.159478	0.0881967	1.80821	0.0705736	0.282743	881.596	786.928	778.98	699.863	734.105	754.931	Dbil5	ENSMUSG00000038057	diazepam binding inhibitor-like 5 [Source:MGI Symbol;Acc:MGI:108039]
ENSMUST00000050234	180.329	-0.244639	0.135311	-1.80798	0.0706091	0.282743	169.849	162.281	162.732	199.43	197.465	190.219	Jrk	ENSMUSG00000046380	jerky [Source:MGI Symbol;Acc:MGI:106214]
ENSMUST00000066408	95.109	0.350644	0.193747	1.8098	0.0703268	0.282743	126.713	96.0995	96.0386	101.573	75.5013	74.7288	1700016K19Rik	ENSMUSG00000053783	RIKEN cDNA 1700016K19 gene [Source:MGI Symbol;Acc:MGI:1921480]
ENSMUST00000104979	68.2535	0.402227	0.221876	1.81285	0.0698551	0.282743	94.3604	58.9289	80.0322	56.98	58.0779	61.1417	Rnf148	ENSMUSG00000078179	ring finger protein 148 [Source:MGI Symbol;Acc:MGI:1918550]
ENSMUST00000119018	72.294	-0.381568	0.210636	-1.81151	0.0700623	0.282743	64.7043	60.7421	63.1365	94.1409	62.7242	88.3158	Gm11282	ENSMUSG00000081265	predicted gene 11282 [Source:MGI Symbol;Acc:MGI:3650570]
ENSMUST00000141035	1068.31	-0.162627	0.0897705	-1.81159	0.0700502	0.282743	1065.82	1050.75	906.142	1135.88	1203.37	1047.9	Gm14471	ENSMUSG00000084892	predicted gene 14471 [Source:MGI Symbol;Acc:MGI:3650368]
ENSMUST00000146423	139.293	-0.30657	0.169667	-1.80689	0.0707792	0.282743	107.84	153.215	112.045	178.372	138.225	146.061	1110008P14Rik	ENSMUSG00000039195	RIKEN cDNA 1110008P14 gene [Source:MGI Symbol;Acc:MGI:1920987]
ENSMUST00000192772	71.5918	0.410227	0.227033	1.8069	0.0707771	0.282743	67.4003	97.0061	80.0322	81.7539	46.4623	56.8958	6430511E19Rik	ENSMUSG00000102555	RIKEN cDNA 6430511E19 gene [Source:MGI Symbol;Acc:MGI:2443259]
ENSMUST00000236352	274.296	-0.228437	0.126377	-1.80758	0.0706713	0.282743	285.777	242.062	228.536	314.629	308.975	265.797	Cyb561a3	ENSMUSG00000034445	cytochrome b561 family, member A3 [Source:MGI Symbol;Acc:MGI:2686925]
ENSMUST00000074156	69.709	0.392542	0.217364	1.80592	0.0709314	0.282853	62.907	82.5005	92.4817	60.6961	53.4317	66.2369	Ak8	ENSMUSG00000026807	adenylate kinase 8 [Source:MGI Symbol;Acc:MGI:1916120]
ENSMUST00000002914	1686.34	0.175222	0.0971259	1.80407	0.0712203	0.282857	1879.12	1954.63	1530.39	1565.71	1728.4	1459.76	Chaf1a	ENSMUSG00000002835	chromatin assembly factor 1, subunit A (p150) [Source:MGI Symbol;Acc:MGI:1351331]
ENSMUST00000203535	100.44	-0.316915	0.17572	-1.80352	0.0713065	0.282857	86.2724	88.8467	92.4817	120.153	113.833	101.054	Gm2011	ENSMUSG00000107741	predicted gene 2011 [Source:MGI Symbol;Acc:MGI:3780180]
ENSMUST00000237696	75.4606	-0.357411	0.198065	-1.80451	0.0711515	0.282857	65.603	63.4619	69.3612	80.5152	90.6016	83.2207	Gm50250	ENSMUSG00000117835	predicted gene, 50250 [Source:MGI Symbol;Acc:MGI:6303065]
ENSMUST00000226616	97.6119	-0.32979	0.183059	-1.80155	0.0716159	0.283589	72.7923	98.8193	88.0354	115.199	98.7325	112.093	Gm534	ENSMUSG00000115398	predicted gene 534 [Source:MGI Symbol;Acc:MGI:2685380]
ENSMUST00000192325	98.9324	0.364128	0.202338	1.79961	0.0719227	0.284308	95.2591	144.149	96.0386	75.5604	78.986	103.601	Gm37334	ENSMUSG00000104525	predicted gene, 37334 [Source:MGI Symbol;Acc:MGI:5610562]
ENSMUST00000180871	126.075	-0.312657	0.174202	-1.79479	0.0726866	0.286828	88.9684	136.896	111.156	135.018	154.487	129.926	Gm26800	ENSMUSG00000097896	predicted gene, 26800 [Source:MGI Symbol;Acc:MGI:5477294]
ENSMUST00000213578	114.197	-0.318811	0.177748	-1.79361	0.0728759	0.287075	83.5764	106.979	114.713	137.495	105.702	136.72	Gm18942	ENSMUSG00000111313	predicted gene, 18942 [Source:MGI Symbol;Acc:MGI:5011127]
ENSMUST00000134550	317.335	0.357648	0.199711	1.79083	0.0733208	0.287505	448.437	288.298	332.578	294.81	261.351	278.535	Prps1l1	ENSMUSG00000092305	phosphoribosyl pyrophosphate synthetase 1-like 1 [Source:MGI Symbol;Acc:MGI:1922706]
ENSMUST00000139218	411.459	-0.200322	0.111877	-1.79055	0.0733652	0.287505	407.997	405.25	334.357	483.091	422.807	415.254	Gm16201	ENSMUSG00000086742	predicted gene 16201 [Source:MGI Symbol;Acc:MGI:3802153]
ENSMUST00000189534	95.7431	-0.366345	0.204492	-1.79149	0.0732145	0.287505	62.907	107.885	80.0322	126.347	89.44	107.847	Pfkfb2	ENSMUSG00000026409	6-phosphofructo-2-kinase/fructose-2,6-biphosphatase 2 [Source:MGI Symbol;Acc:MGI:107815]
ENSMUST00000133270	131.012	-0.313386	0.175125	-1.7895	0.073535	0.287674	92.5631	136.896	120.048	146.166	167.264	123.133	Gm16229	ENSMUSG00000085731	predicted gene 16229 [Source:MGI Symbol;Acc:MGI:3802021]
ENSMUST00000000291	91.434	0.32714	0.183344	1.78429	0.0743761	0.289964	111.435	95.1929	98.7064	79.2765	82.4707	81.5223	Mnt	ENSMUSG00000000282	max binding protein [Source:MGI Symbol;Acc:MGI:109150]
ENSMUST00000055770	115.268	0.311306	0.174399	1.78503	0.0742572	0.289964	149.179	106.072	128.052	104.05	96.4094	107.847	Hist1h1a	ENSMUSG00000049539	histone cluster 1, H1a [Source:MGI Symbol;Acc:MGI:1931523]
ENSMUST00000156511	160.706	-0.265194	0.148964	-1.78026	0.075033	0.291812	151.875	150.495	134.276	199.43	171.911	156.251	1700110K17Rik	ENSMUSG00000087047	RIKEN cDNA 1700110K17 gene [Source:MGI Symbol;Acc:MGI:1920808]
ENSMUST00000166599	444.814	0.190596	0.107088	1.77981	0.0751072	0.291812	508.648	419.755	492.643	418.679	440.231	388.929	Lpcat2b	ENSMUSG00000033794	lysophosphatidylcholine acyltransferase 2B [Source:MGI Symbol;Acc:MGI:1918152]
ENSMUST00000192259	717.006	0.168886	0.0950212	1.77735	0.0755106	0.292878	822.284	746.131	706.062	691.192	719.005	617.362	Gm37459	ENSMUSG00000104283	predicted gene, 37459 [Source:MGI Symbol;Acc:MGI:5610687]
ENSMUST00000026479	154.502	0.275147	0.155217	1.77265	0.076286	0.293876	187.822	171.347	149.393	117.676	152.164	148.608	Dctn2	ENSMUSG00000025410	dynactin 2 [Source:MGI Symbol;Acc:MGI:107733]
ENSMUST00000099123	94.6813	0.337042	0.189912	1.77473	0.0759432	0.293876	107.84	93.3797	116.491	65.6509	96.4094	88.3158	1700034I23Rik	ENSMUSG00000074619	RIKEN cDNA 1700034I23 gene [Source:MGI Symbol;Acc:MGI:1920547]
ENSMUST00000110689	71.7244	0.381413	0.215142	1.77284	0.0762549	0.293876	88.9684	63.4619	91.5924	54.5026	63.8857	67.9353	C7	ENSMUSG00000079105	complement component 7 [Source:MGI Symbol;Acc:MGI:88235]
ENSMUST00000138539	79.8276	-0.344451	0.194263	-1.77312	0.0762088	0.293876	73.691	62.5553	74.6967	92.9022	85.9553	89.165	Gm15591	ENSMUSG00000086237	predicted gene 15591 [Source:MGI Symbol;Acc:MGI:3783038]
ENSMUST00000060855	714.155	0.169995	0.0960699	1.76949	0.0768116	0.294401	811.5	796.9	660.71	670.134	662.088	683.598	H1fnt	ENSMUSG00000048077	H1 histone family, member N, testis-specific [Source:MGI Symbol;Acc:MGI:1917319]
ENSMUST00000168579	278.822	0.217181	0.122724	1.76967	0.0767823	0.294401	303.751	313.683	280.113	258.887	288.067	228.432	Slc16a3	ENSMUSG00000025161	solute carrier family 16 (monocarboxylic acid transporters), member 3 [Source:MGI Symbol;Acc:MGI:1933438]
ENSMUST00000232479	268.033	-0.222122	0.125472	-1.77028	0.0766799	0.294401	213.884	281.952	246.321	287.377	295.036	283.63	Ydjc	ENSMUSG00000041774	YdjC homolog (bacterial) [Source:MGI Symbol;Acc:MGI:1916351]
ENSMUST00000196239	72.5968	0.366674	0.20773	1.76515	0.0775389	0.296188	95.2591	71.6213	78.2537	61.9348	67.3704	61.1417	4930558C23Rik	ENSMUSG00000105734	RIKEN cDNA 4930558C23 gene [Source:MGI Symbol;Acc:MGI:1914904]
ENSMUST00000218470	64.1483	-0.384631	0.217815	-1.76586	0.0774194	0.296188	45.8322	58.0223	63.1365	69.3669	75.5013	73.0304	Cyp3a61-ps1	ENSMUSG00000112214	cytochrome P450, family 3, subfamily a, member 61, pseudogene 1 [Source:MGI Symbol;Acc:MGI:5295684]
ENSMUST00000026704	111.963	0.305962	0.173852	1.7599	0.0784251	0.298083	109.638	131.457	131.609	89.1861	95.2478	114.641	Cct8	ENSMUSG00000025613	chaperonin containing Tcp1, subunit 8 (theta) [Source:MGI Symbol;Acc:MGI:107183]
ENSMUST00000204835	136.179	-0.273854	0.155524	-1.76085	0.0782639	0.298083	112.334	131.457	125.384	152.36	157.972	137.569	Gm44168	ENSMUSG00000108049	predicted gene, 44168 [Source:MGI Symbol;Acc:MGI:5690560]
ENSMUST00000222624	77.7347	0.348723	0.198152	1.75987	0.078429	0.298083	78.1844	96.0995	87.1462	65.6509	69.6935	69.6336	4930408O17Rik	ENSMUSG00000021101	RIKEN cDNA 4930408O17 gene [Source:MGI Symbol;Acc:MGI:1921178]
ENSMUST00000233181	64.6961	-0.425028	0.242117	-1.75546	0.07918	0.300434	53.9202	40.7969	70.2505	69.3669	95.2478	58.5942	C230013L11Rik	ENSMUSG00000117171	RIKEN cDNA C230013L11 gene [Source:MGI Symbol;Acc:MGI:2442581]
ENSMUST00000087215	164.581	-0.258691	0.147444	-1.7545	0.0793454	0.300559	158.166	155.028	135.166	189.52	191.657	157.949	Cnot9	ENSMUSG00000026174	CCR4-NOT transcription complex, subunit 9 [Source:MGI Symbol;Acc:MGI:1928902]
ENSMUST00000115268	256.772	-0.238747	0.136284	-1.75183	0.0798027	0.301787	210.289	274.699	220.533	273.752	315.944	245.416	Csf1r	ENSMUSG00000024621	colony stimulating factor 1 receptor [Source:MGI Symbol;Acc:MGI:1339758]
ENSMUST00000026568	96.1403	0.311426	0.177909	1.75048	0.0800357	0.302165	111.435	104.259	104.042	85.47	82.4707	89.165	Ptdss2	ENSMUSG00000025495	phosphatidylserine synthase 2 [Source:MGI Symbol;Acc:MGI:1351664]
ENSMUST00000043624	136.903	0.304325	0.174446	1.74452	0.0810685	0.305556	131.206	147.776	176.96	102.812	111.51	151.156	Med13	ENSMUSG00000034297	mediator complex subunit 13 [Source:MGI Symbol;Acc:MGI:3029632]
ENSMUST00000053086	88.9377	0.334637	0.191997	1.74293	0.0813467	0.305619	110.537	81.5939	105.82	79.2765	73.1782	83.2207	Adam6a	ENSMUSG00000043945	a disintegrin and metallopeptidase domain 6A [Source:MGI Symbol;Acc:MGI:2676316]
ENSMUST00000063683	105.364	-0.322755	0.185185	-1.74288	0.0813548	0.305619	88.9684	102.446	88.9247	101.573	147.518	102.752	Tagap1	ENSMUSG00000052031	T cell activation GTPase activating protein 1 [Source:MGI Symbol;Acc:MGI:1919786]
ENSMUST00000030896	70.2635	0.384923	0.221195	1.7402	0.0818245	0.306377	94.3604	61.6487	83.5892	50.7865	61.5626	69.6336	Tprgl	ENSMUSG00000029030	transformation related protein 63 regulated like [Source:MGI Symbol;Acc:MGI:1915058]
ENSMUST00000036156	222.053	0.233005	0.133961	1.73935	0.0819729	0.306377	261.513	221.21	237.429	178.372	229.989	203.806	Ipo13	ENSMUSG00000033365	importin 13 [Source:MGI Symbol;Acc:MGI:2385205]
ENSMUST00000104962	300.623	0.222327	0.127768	1.74008	0.0818442	0.306377	366.658	319.123	285.448	308.435	240.443	283.63	4931440F15Rik	ENSMUSG00000078157	RIKEN cDNA 4931440F15 gene [Source:MGI Symbol;Acc:MGI:2441689]
ENSMUST00000130270	65.1821	-0.424209	0.243988	-1.73865	0.0820965	0.306377	44.9335	76.1543	45.3516	95.3795	63.8857	65.3877	Bicd1	ENSMUSG00000003452	BICD cargo adaptor 1 [Source:MGI Symbol;Acc:MGI:1101760]
ENSMUST00000040636	100.457	0.306809	0.177286	1.73059	0.0835247	0.310684	114.131	99.7259	119.159	96.6182	84.7938	88.3158	Sec1	ENSMUSG00000040364	secretory blood group 1 [Source:MGI Symbol;Acc:MGI:1928893]
ENSMUST00000146222	169.438	-0.248674	0.143693	-1.7306	0.0835236	0.310684	134.801	161.375	168.068	187.043	187.011	178.33	Gm15342	ENSMUSG00000085884	predicted gene 15342 [Source:MGI Symbol;Acc:MGI:3705188]
ENSMUST00000207643	77.1751	-0.356342	0.206002	-1.7298	0.0836663	0.310702	60.2109	85.2203	57.801	86.7087	84.7938	88.3158	Gm44621	ENSMUSG00000109190	predicted gene 44621 [Source:MGI Symbol;Acc:MGI:5753197]
ENSMUST00000018805	457.448	-0.172274	0.0997926	-1.72632	0.0842898	0.311374	437.653	414.316	436.62	509.104	499.47	447.523	Cog1	ENSMUSG00000018661	component of oligomeric golgi complex 1 [Source:MGI Symbol;Acc:MGI:1333873]
ENSMUST00000025684	226.371	0.219512	0.127424	1.72269	0.0849452	0.311374	248.033	224.836	258.771	203.146	200.95	222.488	Ehd1	ENSMUSG00000024772	EH-domain containing 1 [Source:MGI Symbol;Acc:MGI:1341878]
ENSMUST00000058635	120.464	0.306916	0.177971	1.72453	0.0846115	0.311374	145.585	122.391	132.498	79.2765	130.095	112.942	Slc25a2	ENSMUSG00000050304	solute carrier family 25 (mitochondrial carrier, ornithine transporter) member 2 [Source:MGI Symbol;Acc:MGI:2137907]
ENSMUST00000062437	90.5359	0.352354	0.204251	1.7251	0.0845087	0.311374	116.827	116.045	72.029	74.3217	82.4707	81.5223	Nkx2-6	ENSMUSG00000044186	NK2 homeobox 6 [Source:MGI Symbol;Acc:MGI:97351]
ENSMUST00000081908	397.853	0.205477	0.119192	1.72392	0.0847228	0.311374	505.952	396.184	376.151	383.996	355.437	369.398	Rpl10l	ENSMUSG00000060499	ribosomal protein L10-like [Source:MGI Symbol;Acc:MGI:3647985]
ENSMUST00000165001	62.5315	0.388534	0.225121	1.72589	0.084367	0.311374	66.5016	59.8355	86.2569	54.5026	54.5933	53.499	Gm6872	ENSMUSG00000091004	predicted gene 6872 [Source:MGI Symbol;Acc:MGI:3643699]
ENSMUST00000181515	111.199	0.294219	0.170756	1.72304	0.0848806	0.311374	115.929	120.578	129.83	106.528	106.863	87.4666	Carlr	ENSMUSG00000097638	cardiac and apoptosis-related long non-coding RNA [Source:MGI Symbol;Acc:MGI:1914024]
ENSMUST00000228874	94.6086	0.319062	0.184711	1.72736	0.0841031	0.311374	121.321	97.0061	96.9279	78.0378	89.44	84.9191	5830448L01Rik	ENSMUSG00000115007	RIKEN cDNA 5830448L01 gene [Source:MGI Symbol;Acc:MGI:1923281]
ENSMUST00000196920	124.613	-0.280909	0.163249	-1.72074	0.0852979	0.312163	107.84	104.259	124.495	147.405	140.549	123.133	Gm42934	ENSMUSG00000106451	predicted gene 42934 [Source:MGI Symbol;Acc:MGI:5663071]
ENSMUST00000184014	79.1912	-0.382975	0.222676	-1.71987	0.0854553	0.312235	47.6296	94.2863	64.0258	90.4248	96.4094	82.3715	1500004A13Rik	ENSMUSG00000098912	RIKEN cDNA 1500004A13 gene [Source:MGI Symbol;Acc:MGI:2442808]
ENSMUST00000099547	211.905	0.240084	0.140293	1.7113	0.0870251	0.31746	248.932	218.49	223.201	188.282	164.941	227.583	Fam8a1	ENSMUSG00000069237	family with sequence similarity 8, member A1 [Source:MGI Symbol;Acc:MGI:2145496]
ENSMUST00000102813	151.806	0.263763	0.154558	1.70656	0.087904	0.320151	169.849	185.853	141.39	146.166	126.61	140.966	Cfap157	ENSMUSG00000038987	cilia and flagella associated protein 157 [Source:MGI Symbol;Acc:MGI:2447809]
ENSMUST00000151215	392.573	0.206206	0.120924	1.70526	0.0881465	0.32052	440.349	417.942	401.05	354.267	434.423	307.407	4933407I08Rik	ENSMUSG00000084959	RIKEN cDNA 4933407I08 gene [Source:MGI Symbol;Acc:MGI:1918259]
ENSMUST00000076957	239.328	-0.21282	0.124961	-1.7031	0.0885498	0.321471	224.668	231.183	208.084	263.842	272.966	235.226	Zdhhc8	ENSMUSG00000060166	zinc finger, DHHC domain containing 8 [Source:MGI Symbol;Acc:MGI:1338012]
ENSMUST00000208602	1879.67	0.151364	0.0891128	1.69856	0.0894018	0.324046	2166.7	1807.76	1963.46	1667.28	1708.65	1964.18	Qrich2	ENSMUSG00000070331	glutamine rich 2 [Source:MGI Symbol;Acc:MGI:2684912]
ENSMUST00000002412	86.4964	0.321873	0.189797	1.69588	0.0899082	0.324371	104.246	87.9401	96.9279	70.6056	74.3398	84.9191	Ncan	ENSMUSG00000002341	neurocan [Source:MGI Symbol;Acc:MGI:104694]
ENSMUST00000099071	171.51	0.285914	0.168669	1.69512	0.0900523	0.324371	243.54	145.962	176.071	144.927	161.457	157.1	Mocs3	ENSMUSG00000074576	molybdenum cofactor synthesis 3 [Source:MGI Symbol;Acc:MGI:1916622]
ENSMUST00000180139	123.841	0.29146	0.171823	1.69628	0.0898331	0.324371	127.611	136.896	145.836	113.96	87.1169	131.625	1700014D04Rik	ENSMUSG00000051054	RIKEN cDNA 1700014D04 gene [Source:MGI Symbol;Acc:MGI:1921474]
ENSMUST00000208283	82.9009	-0.35506	0.209467	-1.69506	0.0900633	0.324371	70.0963	77.0609	70.2505	82.9926	123.125	73.8796	Cfap97d2	ENSMUSG00000090336	CFAP97 domain containing 2 [Source:MGI Symbol;Acc:MGI:2685952]
ENSMUST00000043970	182.126	0.242447	0.143716	1.68699	0.0916062	0.328884	210.289	170.441	212.53	154.837	163.78	180.878	Nutm1	ENSMUSG00000041358	NUT midline carcinoma, family member 1 [Source:MGI Symbol;Acc:MGI:2661384]
ENSMUST00000211623	424.767	0.203783	0.120792	1.68706	0.0915923	0.328884	518.533	448.766	399.272	339.403	401.899	440.73	Eid3	ENSMUSG00000109864	EP300 interacting inhibitor of differentiation 3 [Source:MGI Symbol;Acc:MGI:1913591]
ENSMUST00000011029	759.418	0.168162	0.100161	1.67892	0.0931677	0.330245	745.897	929.264	735.407	704.818	742.236	698.884	Dnajc19	ENSMUSG00000027679	DnaJ heat shock protein family (Hsp40) member C19 [Source:MGI Symbol;Acc:MGI:1914963]
ENSMUST00000021311	98.9323	-0.297694	0.177461	-1.67752	0.0934409	0.330245	92.5631	81.5939	92.4817	97.8569	116.156	112.942	Kif18b	ENSMUSG00000051378	kinesin family member 18B [Source:MGI Symbol;Acc:MGI:2446979]
ENSMUST00000062125	65.3712	-0.356465	0.212075	-1.68085	0.0927927	0.330245	57.5149	56.2091	57.801	79.2765	74.3398	67.0861	Timm29	ENSMUSG00000048429	translocase of inner mitochondrial membrane 29 [Source:MGI Symbol;Acc:MGI:1917023]
ENSMUST00000075671	95.6352	0.304202	0.181182	1.67898	0.0931555	0.330245	101.55	118.764	96.9279	85.47	83.6322	87.4666	Nfatc2ip	ENSMUSG00000030722	nuclear factor of activated T cells, cytoplasmic, calcineurin dependent 2 interacting protein [Source:MGI Symbol;Acc:MGI:1329015]
ENSMUST00000121017	78.934	0.356503	0.212514	1.67755	0.0934351	0.330245	110.537	84.3137	72.029	65.6509	60.4011	80.6731	Ccdc155	ENSMUSG00000038292	coiled-coil domain containing 155 [Source:MGI Symbol;Acc:MGI:2687329]
ENSMUST00000131487	240.32	-0.226386	0.134929	-1.67782	0.0933821	0.330245	203.998	260.194	199.191	274.99	268.32	235.226	Pogk	ENSMUSG00000040596	pogo transposable element with KRAB domain [Source:MGI Symbol;Acc:MGI:1918842]
ENSMUST00000139405	239.233	0.231749	0.137844	1.68125	0.0927147	0.330245	287.575	258.381	227.647	260.126	202.111	199.56	Frs3	ENSMUSG00000023266	fibroblast growth factor receptor substrate 3 [Source:MGI Symbol;Acc:MGI:2135965]
ENSMUST00000152849	101.567	-0.312831	0.186116	-1.68084	0.092794	0.330245	82.6777	92.4731	95.1494	128.824	121.964	88.3158	Gm12081	ENSMUSG00000084905	predicted gene 12081 [Source:MGI Symbol;Acc:MGI:3650553]
ENSMUST00000199146	71.5029	-0.361444	0.215213	-1.67947	0.0930599	0.330245	58.4136	75.2477	54.244	66.8896	95.2478	78.9747	Gm9523	ENSMUSG00000106181	predicted gene 9523 [Source:MGI Symbol;Acc:MGI:3779932]
ENSMUST00000217105	68.3406	0.386712	0.230216	1.67978	0.0930003	0.330245	87.1711	56.2091	88.0354	73.083	54.5933	50.9514	4930563M21Rik	ENSMUSG00000050702	RIKEN cDNA 4930563M21 gene [Source:MGI Symbol;Acc:MGI:1922508]
ENSMUST00000047085	1128.42	-0.15426	0.0921024	-1.67488	0.0939584	0.331558	1102.67	1163.17	937.266	1196.58	1253.32	1117.53	Tbc1d17	ENSMUSG00000038520	TBC1 domain family, member 17 [Source:MGI Symbol;Acc:MGI:2449973]
ENSMUST00000031099	211.607	-0.229294	0.137272	-1.67036	0.0948489	0.333899	162.659	201.265	220.533	222.965	234.635	227.583	Grpel1	ENSMUSG00000029198	GrpE-like 1, mitochondrial [Source:MGI Symbol;Acc:MGI:1334417]
ENSMUST00000212921	96.9854	-0.343104	0.205449	-1.67002	0.0949163	0.333899	74.5897	79.7807	100.485	131.302	118.479	77.2764	Gm45765	ENSMUSG00000110718	predicted gene 45765 [Source:MGI Symbol;Acc:MGI:5804880]
ENSMUST00000054234	645.684	-0.15266	0.0915305	-1.66786	0.0953445	0.334369	587.731	660.91	586.903	647.838	696.935	693.789	Nek6	ENSMUSG00000026749	NIMA (never in mitosis gene a)-related expressed kinase 6 [Source:MGI Symbol;Acc:MGI:1891638]
ENSMUST00000192900	84.1076	0.326199	0.195499	1.66855	0.0952073	0.334369	100.651	102.446	78.2537	70.6056	72.0166	80.6731	Gm38001	ENSMUSG00000103485	predicted gene, 38001 [Source:MGI Symbol;Acc:MGI:5611229]
ENSMUST00000001184	71.3405	0.372793	0.223698	1.6665	0.0956132	0.334794	94.3604	77.9675	70.2505	42.1156	72.0166	71.332	Mxd1	ENSMUSG00000001156	MAX dimerization protein 1 [Source:MGI Symbol;Acc:MGI:96908]
ENSMUST00000195992	92.4194	-0.311738	0.187149	-1.66572	0.095769	0.334823	69.1976	83.4071	94.2602	106.528	106.863	94.2602	4932422M17Rik	ENSMUSG00000105881	RIKEN cDNA 4932422M17 gene [Source:MGI Symbol;Acc:MGI:1921616]
ENSMUST00000056085	349.576	0.199188	0.11995	1.6606	0.0967941	0.33685	413.389	317.31	391.269	327.016	302.005	346.47	Csl	ENSMUSG00000046934	citrate synthase like [Source:MGI Symbol;Acc:MGI:1919082]
ENSMUST00000196879	334.829	0.200421	0.120617	1.66163	0.0965876	0.33685	408.895	331.815	331.689	338.164	314.782	283.63	Gm44335	ENSMUSG00000105072	predicted gene, 44335 [Source:MGI Symbol;Acc:MGI:5690727]
ENSMUST00000197636	128.5	0.285628	0.171992	1.6607	0.0967732	0.33685	150.078	159.561	112.934	131.302	112.671	104.45	Gm42794	ENSMUSG00000104839	predicted gene 42794 [Source:MGI Symbol;Acc:MGI:5662931]
ENSMUST00000105686	101.822	0.340386	0.205418	1.65704	0.0975105	0.338823	133.902	82.5005	125.384	101.573	67.3704	100.204	Slc25a33	ENSMUSG00000028982	solute carrier family 25, member 33 [Source:MGI Symbol;Acc:MGI:1917806]
ENSMUST00000058479	67.2116	0.35695	0.215778	1.65425	0.0980777	0.33991	84.4751	76.1543	66.6935	55.7413	52.2701	67.9353	Drc7	ENSMUSG00000031786	dynein regulatory complex subunit 7 [Source:MGI Symbol;Acc:MGI:2685616]
ENSMUST00000218156	178.053	0.238786	0.144367	1.65402	0.0981229	0.33991	219.276	177.693	180.517	162.269	176.557	152.005	Gm47956	ENSMUSG00000112000	predicted gene, 47956 [Source:MGI Symbol;Acc:MGI:6097228]
ENSMUST00000030826	804.142	0.155069	0.0941939	1.64628	0.0997066	0.344869	955.287	773.329	812.771	759.32	779.406	744.74	Slc2a5	ENSMUSG00000028976	solute carrier family 2 (facilitated glucose transporter), member 5 [Source:MGI Symbol;Acc:MGI:1928369]
ENSMUST00000034131	180.607	0.230611	0.140374	1.64283	0.100419	0.345751	216.58	188.573	180.517	154.837	170.749	172.386	Vps35	ENSMUSG00000031696	VPS35 retromer complex component [Source:MGI Symbol;Acc:MGI:1890467]
ENSMUST00000167899	426.709	-0.175431	0.106718	-1.64388	0.100201	0.345751	398.111	444.233	359.256	468.227	456.493	433.936	Gm17484	ENSMUSG00000091514	predicted gene, 17484 [Source:MGI Symbol;Acc:MGI:4937118]
ENSMUST00000171798	157.51	0.245233	0.149274	1.64284	0.100416	0.345751	162.659	155.028	194.745	147.405	141.71	143.513	Fam71a	ENSMUSG00000091017	family with sequence similarity 71, member A [Source:MGI Symbol;Acc:MGI:3588202]
ENSMUST00000039559	391.504	-0.195099	0.11897	-1.6399	0.101025	0.346788	382.834	365.359	344.138	479.375	427.454	349.867	Thbs1	ENSMUSG00000040152	thrombospondin 1 [Source:MGI Symbol;Acc:MGI:98737]
ENSMUST00000107376	225.258	0.22984	0.14013	1.64019	0.100965	0.346788	253.425	242.062	233.872	245.262	163.78	213.147	Nkiras2	ENSMUSG00000017837	NFKB inhibitor interacting Ras-like protein 2 [Source:MGI Symbol;Acc:MGI:1919216]
ENSMUST00000038677	194.501	0.219637	0.134145	1.63731	0.101566	0.348117	215.681	197.639	215.198	183.327	164.941	190.219	Rrp12	ENSMUSG00000035049	ribosomal RNA processing 12 homolog (S. cerevisiae) [Source:MGI Symbol;Acc:MGI:2147437]
ENSMUST00000128263	80.8846	-0.315322	0.19277	-1.63574	0.101894	0.348716	79.083	67.9949	69.3612	84.2313	92.9247	91.7126	Gm12841	ENSMUSG00000085278	predicted gene 12841 [Source:MGI Symbol;Acc:MGI:3651048]
ENSMUST00000160247	113.178	0.273759	0.16751	1.63428	0.102199	0.349231	112.334	126.924	132.498	105.289	97.5709	104.45	Cfap43	ENSMUSG00000044948	cilia and flagella associated protein 43 [Source:MGI Symbol;Acc:MGI:1289258]
ENSMUST00000056941	382.062	0.19448	0.119171	1.63193	0.102694	0.350394	412.49	378.052	434.842	365.415	297.359	404.215	Spem2	ENSMUSG00000044084	SPEM family member 2 [Source:MGI Symbol;Acc:MGI:1918293]
ENSMUST00000087517	97.3772	0.323528	0.199056	1.62531	0.104097	0.354649	128.51	89.7533	107.599	63.1735	97.5709	97.6569	Dido1	ENSMUSG00000038914	death inducer-obliterator 1 [Source:MGI Symbol;Acc:MGI:1344352]
ENSMUST00000052978	166.944	0.262509	0.161719	1.62324	0.104539	0.355088	183.329	143.243	220.533	139.973	149.841	164.743	Spata31d1d	ENSMUSG00000043986	spermatogenesis associated 31 subfamily D, member 1D [Source:MGI Symbol;Acc:MGI:3045260]
ENSMUST00000206733	84.9207	-0.310035	0.190949	-1.62365	0.10445	0.355088	75.4883	86.1269	65.8043	96.6182	92.9247	92.5618	Zfp574	ENSMUSG00000045252	zinc finger protein 574 [Source:MGI Symbol;Acc:MGI:2442951]
ENSMUST00000050918	103.16	0.293414	0.180887	1.62208	0.104786	0.355249	129.409	97.0061	113.824	90.4248	103.379	84.9191	Camk2n1	ENSMUSG00000046447	calcium/calmodulin-dependent protein kinase II inhibitor 1 [Source:MGI Symbol;Acc:MGI:1913509]
ENSMUST00000057236	98.6231	0.507564	0.313218	1.62048	0.105129	0.355249	91.6644	113.325	143.169	80.5152	56.9164	106.149	Dnajb7	ENSMUSG00000047108	DnaJ heat shock protein family (Hsp40) member B7 [Source:MGI Symbol;Acc:MGI:1914012]
ENSMUST00000207680	264.248	-0.22722	0.140173	-1.62099	0.10502	0.355249	205.796	254.754	267.663	327.016	295.036	235.226	Lyrm1	ENSMUSG00000030922	LYR motif containing 1 [Source:MGI Symbol;Acc:MGI:1921169]
ENSMUST00000208885	103.4	0.28938	0.17862	1.62009	0.105213	0.355249	123.118	119.671	97.8171	104.05	88.2785	87.4666	Gm44710	ENSMUSG00000109455	predicted gene 44710 [Source:MGI Symbol;Acc:MGI:5753286]
ENSMUST00000108379	149.435	-0.250741	0.15512	-1.61643	0.106002	0.357382	139.294	134.177	134.276	184.566	168.426	135.871	BC024978	ENSMUSG00000078786	cDNA sequence BC024978 [Source:MGI Symbol;Acc:MGI:3041247]
ENSMUST00000215803	258.002	-0.20883	0.129353	-1.61442	0.106436	0.358312	239.945	260.194	216.087	307.196	283.42	241.17	Gm30934	ENSMUSG00000111082	predicted gene, 30934 [Source:MGI Symbol;Acc:MGI:5590093]
ENSMUST00000055495	70.4753	0.334718	0.207433	1.61362	0.10661	0.358366	79.9817	78.8741	76.4752	59.4574	72.0166	56.0466	Pcdhb12	ENSMUSG00000043458	protocadherin beta 12 [Source:MGI Symbol;Acc:MGI:2136747]
ENSMUST00000070375	67.4544	0.351185	0.218047	1.61059	0.107269	0.359827	80.8804	71.6213	75.586	44.593	61.5626	70.4828	Penk	ENSMUSG00000045573	preproenkephalin [Source:MGI Symbol;Acc:MGI:104629]
ENSMUST00000095959	62.58	0.362353	0.225042	1.61015	0.107364	0.359827	67.4003	67.0883	75.586	68.1282	52.2701	45.0071	Ptgdr	ENSMUSG00000071489	prostaglandin D receptor [Source:MGI Symbol;Acc:MGI:102966]
ENSMUST00000205414	122.776	-0.266977	0.165882	-1.60944	0.10752	0.359827	112.334	116.045	104.931	157.314	125.448	120.585	Gm44711	ENSMUSG00000108625	predicted gene 44711 [Source:MGI Symbol;Acc:MGI:5753287]
ENSMUST00000100848	80.3072	-0.320927	0.199537	-1.60836	0.107756	0.360085	59.3123	80.6873	73.8075	100.334	83.6322	84.0699	Gm10401	ENSMUSG00000072693	predicted gene 10401 [Source:MGI Symbol;Acc:MGI:3704254]
ENSMUST00000193501	87.6104	-0.328691	0.20451	-1.60722	0.108007	0.360393	58.4136	84.3137	89.8139	89.1861	117.317	86.6174	Gm37710	ENSMUSG00000102797	predicted gene, 37710 [Source:MGI Symbol;Acc:MGI:5610938]
ENSMUST00000205892	83.7893	-0.30761	0.191504	-1.60629	0.108211	0.360544	70.0963	79.7807	75.586	84.2313	89.44	103.601	4933435G04Rik	ENSMUSG00000108345	RIKEN cDNA 4933435G04 gene [Source:MGI Symbol;Acc:MGI:1918487]
ENSMUST00000021324	132.067	0.248442	0.155544	1.59724	0.110212	0.366163	141.091	142.336	147.615	116.437	114.994	129.926	Map3k14	ENSMUSG00000020941	mitogen-activated protein kinase kinase kinase 14 [Source:MGI Symbol;Acc:MGI:1858204]
ENSMUST00000030950	98.6621	0.286611	0.179445	1.5972	0.11022	0.366163	120.422	100.632	104.931	86.7087	82.4707	96.8077	Cptp	ENSMUSG00000029073	ceramide-1-phosphate transfer protein [Source:MGI Symbol;Acc:MGI:1933107]
ENSMUST00000188069	605.247	-0.143517	0.0900022	-1.5946	0.110802	0.367559	574.251	594.729	556.668	658.986	604.011	642.837	Gm28535	ENSMUSG00000101172	predicted gene 28535 [Source:MGI Symbol;Acc:MGI:5579241]
ENSMUST00000006101	165.011	0.233739	0.146859	1.59159	0.111478	0.368883	195.91	162.281	177.849	135.018	156.81	162.195	Itgae	ENSMUSG00000005947	integrin alpha E, epithelial-associated [Source:MGI Symbol;Acc:MGI:1298377]
ENSMUST00000061391	246.365	0.392043	0.246468	1.59065	0.111689	0.368883	358.57	264.727	216.087	178.372	231.15	229.281	Ccdc89	ENSMUSG00000044362	coiled-coil domain containing 89 [Source:MGI Symbol;Acc:MGI:1917304]
ENSMUST00000205749	68.247	-0.333919	0.209905	-1.59081	0.111653	0.368883	56.6163	68.9015	56.0225	70.6056	76.6629	80.6731	Olfr277-ps1	ENSMUSG00000108568	olfactory receptor 277, pseudogene 1 [Source:MGI Symbol;Acc:MGI:3030111]
ENSMUST00000164935	188.883	0.22369	0.140763	1.58913	0.112031	0.369474	217.478	191.292	203.637	156.076	166.103	198.711	Heatr4	ENSMUSG00000090843	HEAT repeat containing 4 [Source:MGI Symbol;Acc:MGI:4937307]
ENSMUST00000023068	198.307	0.256272	0.161613	1.58572	0.112804	0.370668	206.694	174.974	267.663	164.746	162.618	213.147	Smc1b	ENSMUSG00000022432	structural maintenance of chromosomes 1B [Source:MGI Symbol;Acc:MGI:2154049]
ENSMUST00000047145	116.863	0.272863	0.172009	1.58632	0.112666	0.370668	137.497	113.325	134.276	95.3795	97.5709	123.133	Trim41	ENSMUSG00000040365	tripartite motif-containing 41 [Source:MGI Symbol;Acc:MGI:2384814]
ENSMUST00000181452	88.0441	-0.303248	0.191279	-1.58537	0.112883	0.370668	68.299	74.3411	93.3709	100.334	101.056	90.8634	Gm17435	ENSMUSG00000097000	predicted gene, 17435 [Source:MGI Symbol;Acc:MGI:4937069]
ENSMUST00000168779	80.7179	0.321426	0.202936	1.58388	0.113221	0.37124	76.387	85.2203	107.599	76.7991	62.7242	75.578	2210408I21Rik	ENSMUSG00000071252	RIKEN cDNA 2210408I21 gene [Source:MGI Symbol;Acc:MGI:1919621]
ENSMUST00000052853	197.296	0.21645	0.136796	1.58228	0.113585	0.371898	231.857	201.265	202.748	169.701	203.273	174.933	Ubl4b	ENSMUSG00000055891	ubiquitin-like 4B [Source:MGI Symbol;Acc:MGI:1914841]
ENSMUST00000090061	811.103	0.139597	0.0884828	1.57768	0.11464	0.374768	916.644	793.274	841.227	800.197	730.62	784.652	1700123L14Rik	ENSMUSG00000072878	RIKEN cDNA 1700123L14 gene [Source:MGI Symbol;Acc:MGI:1925732]
ENSMUST00000123949	2049.15	0.125447	0.0795473	1.57701	0.114792	0.374768	2183.77	2222.07	2007.03	1905.11	2125.65	1851.24	Gm12264	ENSMUSG00000086536	predicted gene 12264 [Source:MGI Symbol;Acc:MGI:3702404]
ENSMUST00000026093	64.783	0.3829	0.243113	1.57499	0.11526	0.375754	73.691	49.8629	96.9279	55.7413	48.7855	63.6893	Btbd1	ENSMUSG00000025103	BTB (POZ) domain containing 1 [Source:MGI Symbol;Acc:MGI:1933765]
ENSMUST00000058725	135.979	0.261108	0.166284	1.57025	0.116356	0.378241	135.699	155.935	154.729	123.87	98.7325	146.91	Antxrl	ENSMUSG00000047441	anthrax toxin receptor-like [Source:MGI Symbol;Acc:MGI:1925726]
ENSMUST00000220447	156.456	-0.246632	0.15706	-1.57031	0.116344	0.378241	117.726	147.776	163.621	156.076	190.496	163.045	Ippk	ENSMUSG00000021385	inositol 1,3,4,5,6-pentakisphosphate 2-kinase [Source:MGI Symbol;Acc:MGI:1922928]
ENSMUST00000168625	733.38	-0.151398	0.0964669	-1.56943	0.116549	0.378325	724.329	750.664	609.134	760.559	814.253	741.343	Gm17108	ENSMUSG00000091133	predicted gene 17108 [Source:MGI Symbol;Acc:MGI:4937935]
ENSMUST00000221520	77.2478	-0.341411	0.217887	-1.56692	0.117133	0.379678	72.7923	77.0609	55.1333	61.9348	105.702	90.8634	Gm47603	ENSMUSG00000113665	predicted gene, 47603 [Source:MGI Symbol;Acc:MGI:6096658]
ENSMUST00000020849	411.04	-0.169624	0.108644	-1.56128	0.118457	0.379954	403.503	417.035	341.471	411.247	434.423	458.563	Tom1l1	ENSMUSG00000020541	target of myb1-like 1 (chicken) [Source:MGI Symbol;Acc:MGI:1919193]
ENSMUST00000031305	129.765	-0.262596	0.167784	-1.56508	0.117564	0.379954	133.902	125.111	94.2602	149.882	146.356	129.077	Gm9754	ENSMUSG00000029360	predicted gene 9754 [Source:MGI Symbol;Acc:MGI:3704256]
ENSMUST00000057561	256.051	0.193136	0.123793	1.56015	0.118725	0.379954	295.663	269.26	256.103	230.397	224.181	260.702	Wwc2	ENSMUSG00000031563	WW, C2 and coiled-coil domain containing 2 [Source:MGI Symbol;Acc:MGI:1261872]
ENSMUST00000098929	710.945	0.141799	0.0908828	1.56024	0.118702	0.379954	759.377	780.582	696.28	665.179	724.813	639.441	Gm10702	ENSMUSG00000074467	predicted gene 10702 [Source:MGI Symbol;Acc:MGI:3708679]
ENSMUST00000121418	197.032	0.217507	0.139164	1.56295	0.118064	0.379954	216.58	201.265	219.644	174.656	160.295	209.75	Rab3il1	ENSMUSG00000024663	RAB3A interacting protein (rabin3)-like 1 [Source:MGI Symbol;Acc:MGI:1922010]
ENSMUST00000180791	324.968	-0.179837	0.115264	-1.56021	0.118709	0.379954	307.345	323.656	281.891	344.357	377.507	315.05	4731419I09Rik	ENSMUSG00000097004	RIKEN cDNA 4731419I09 gene [Source:MGI Symbol;Acc:MGI:3704222]
ENSMUST00000196669	225.967	0.209587	0.134167	1.56213	0.118258	0.379954	212.985	281.046	232.983	214.294	205.596	208.901	Gm29151	ENSMUSG00000106005	predicted gene 29151 [Source:MGI Symbol;Acc:MGI:5579857]
ENSMUST00000212313	67.0945	0.332685	0.21307	1.56139	0.118432	0.379954	72.7923	75.2477	75.586	59.4574	68.532	50.9514	Gm36879	ENSMUSG00000110616	predicted gene, 36879 [Source:MGI Symbol;Acc:MGI:5596038]
ENSMUST00000215963	523.146	-0.153078	0.0980295	-1.56155	0.118393	0.379954	471.802	478.684	534.437	549.981	584.264	519.705	Gm20275	ENSMUSG00000110803	predicted gene, 20275 [Source:MGI Symbol;Acc:MGI:5012460]
ENSMUST00000045736	451.247	0.161053	0.10351	1.55593	0.119725	0.382615	496.066	432.448	501.535	396.383	443.715	437.333	Mroh2b	ENSMUSG00000022155	maestro heat-like repeat family member 2B [Source:MGI Symbol;Acc:MGI:1921905]
ENSMUST00000147359	84.9538	0.298643	0.192043	1.55509	0.119926	0.382716	87.1711	94.2863	100.485	64.4122	80.1476	83.2207	4930403D09Rik	ENSMUSG00000087122	RIKEN cDNA 4930403D09 gene [Source:MGI Symbol;Acc:MGI:2441677]
ENSMUST00000046709	609.049	-0.152925	0.0985181	-1.55225	0.120602	0.383795	522.128	640.965	566.45	637.928	673.704	613.116	Supt16	ENSMUSG00000035726	SPT16, facilitates chromatin remodeling subunit [Source:MGI Symbol;Acc:MGI:1890948]
ENSMUST00000180997	112.401	-0.296812	0.191145	-1.55281	0.120468	0.383795	88.9684	101.539	110.267	152.36	131.256	90.0142	BC065403	ENSMUSG00000097211	cDNA sequence BC065403 [Source:MGI Symbol;Acc:MGI:3697430]
ENSMUST00000037423	169.217	0.221914	0.143081	1.55097	0.120909	0.384235	176.139	190.386	178.739	163.508	167.264	139.267	Ovol2	ENSMUSG00000037279	ovo like zinc finger 2 [Source:MGI Symbol;Acc:MGI:1338039]
ENSMUST00000022122	62.7174	0.344988	0.223195	1.54568	0.122182	0.384338	80.8804	58.9289	70.2505	55.7413	60.4011	50.1022	Ckmt2	ENSMUSG00000021622	creatine kinase, mitochondrial 2 [Source:MGI Symbol;Acc:MGI:1923972]
ENSMUST00000031273	196.003	0.222927	0.14404	1.54767	0.121702	0.384338	207.593	196.732	229.426	203.146	146.356	192.766	Cds1	ENSMUSG00000029330	CDP-diacylglycerol synthase 1 [Source:MGI Symbol;Acc:MGI:1921846]
ENSMUST00000080368	113.781	0.293078	0.189536	1.54629	0.122034	0.384338	136.598	90.6599	148.504	112.721	90.6016	103.601	Atp8a2	ENSMUSG00000021983	ATPase, aminophospholipid transporter-like, class I, type 8A, member 2 [Source:MGI Symbol;Acc:MGI:1354710]
ENSMUST00000106875	405.445	-0.168426	0.10871	-1.54932	0.121304	0.384338	356.772	425.195	362.813	417.44	461.139	409.31	Limd2	ENSMUSG00000040699	LIM domain containing 2 [Source:MGI Symbol;Acc:MGI:1915053]
ENSMUST00000107619	184.538	0.237913	0.153926	1.54563	0.122195	0.384338	162.659	218.49	219.644	144.927	169.588	191.917	Klf4	ENSMUSG00000003032	Kruppel-like factor 4 (gut) [Source:MGI Symbol;Acc:MGI:1342287]
ENSMUST00000111243	938.712	0.156308	0.10101	1.54746	0.121752	0.384338	1055.04	848.576	1067.1	863.371	825.868	972.323	Atp1a4	ENSMUSG00000007107	ATPase, Na+/K+ transporting, alpha 4 polypeptide [Source:MGI Symbol;Acc:MGI:1351335]
ENSMUST00000114849	118.527	0.25248	0.162908	1.54983	0.121183	0.384338	135.699	120.578	130.719	104.05	108.025	112.093	Uhrf1bp1	ENSMUSG00000039512	UHRF1 (ICBP90) binding protein 1 [Source:MGI Symbol;Acc:MGI:3041238]
ENSMUST00000223689	166.614	-0.22081	0.142901	-1.5452	0.122297	0.384338	164.457	160.468	136.944	178.372	177.718	181.727	Ccdc66	ENSMUSG00000046753	coiled-coil domain containing 66 [Source:MGI Symbol;Acc:MGI:2443639]
ENSMUST00000197200	170.375	-0.241499	0.156629	-1.54186	0.123108	0.386353	136.598	184.04	146.726	218.01	169.588	167.291	4921539H07Rik	ENSMUSG00000104586	RIKEN cDNA 4921539H07 gene [Source:MGI Symbol;Acc:MGI:1925506]
ENSMUST00000046004	87.8722	0.29604	0.1925	1.53787	0.12408	0.388591	95.2591	82.5005	112.934	73.083	83.6322	79.8239	Tex44	ENSMUSG00000036574	testis expressed 44 [Source:MGI Symbol;Acc:MGI:1919113]
ENSMUST00000187797	68.988	0.336433	0.218815	1.53753	0.124164	0.388591	73.691	74.3411	84.4784	49.5478	54.5933	77.2764	Gm7133	ENSMUSG00000100484	predicted gene 7133 [Source:MGI Symbol;Acc:MGI:3643070]
ENSMUST00000008051	249.789	0.225744	0.14704	1.53526	0.124721	0.389797	231.857	271.073	307.679	194.475	212.565	281.082	Cabs1	ENSMUSG00000007907	calcium binding protein, spermatid specific 1 [Source:MGI Symbol;Acc:MGI:1918227]
ENSMUST00000103107	361.636	-0.164002	0.106947	-1.53349	0.125154	0.390612	359.468	349.041	314.793	372.847	394.93	378.739	Cntd1	ENSMUSG00000078653	cyclin N-terminal domain containing 1 [Source:MGI Symbol;Acc:MGI:1923965]
ENSMUST00000198251	71.0848	-0.349694	0.228213	-1.53232	0.125444	0.39098	55.7176	75.2477	56.9118	55.7413	102.217	80.6731	Gm43713	ENSMUSG00000106218	predicted gene 43713 [Source:MGI Symbol;Acc:MGI:5663850]
ENSMUST00000101610	62.5873	0.335632	0.219366	1.53001	0.126014	0.391257	72.7923	73.4345	63.1365	50.7865	62.7242	52.6498	Rhbdd3	ENSMUSG00000034175	rhomboid domain containing 3 [Source:MGI Symbol;Acc:MGI:2444684]
ENSMUST00000201473	85.7731	0.299441	0.195731	1.52986	0.126051	0.391257	106.942	76.1543	100.485	80.5152	76.6629	73.8796	Rab28	ENSMUSG00000029128	RAB28, member RAS oncogene family [Source:MGI Symbol;Acc:MGI:1917285]
ENSMUST00000216704	101.864	-0.272952	0.178307	-1.53079	0.12582	0.391257	79.9817	104.259	92.4817	120.153	102.217	112.093	Gm47640	ENSMUSG00000111681	predicted gene, 47640 [Source:MGI Symbol;Acc:MGI:6096715]
ENSMUST00000123129	88.495	0.320335	0.209507	1.529	0.126264	0.391385	88.0697	107.885	96.9279	91.6635	92.9247	53.499	Gm13372	ENSMUSG00000086560	predicted gene 13372 [Source:MGI Symbol;Acc:MGI:3650806]
ENSMUST00000206668	66.962	-0.342483	0.224169	-1.52779	0.126565	0.391782	52.1229	77.9675	47.1301	74.3217	75.5013	74.7288	4930486N12Rik	ENSMUSG00000108697	RIKEN cDNA 4930486N12 gene [Source:MGI Symbol;Acc:MGI:1922207]
ENSMUST00000023285	688.946	-0.139955	0.0916815	-1.52654	0.126876	0.392211	621.88	702.614	640.258	755.604	739.913	673.408	Tymp	ENSMUSG00000022615	thymidine phosphorylase [Source:MGI Symbol;Acc:MGI:1920212]
ENSMUST00000210149	284.568	-0.188417	0.123562	-1.52487	0.127292	0.392959	296.561	267.447	232.983	308.435	321.752	280.233	Gm3433	ENSMUSG00000110337	predicted gene 3433 [Source:MGI Symbol;Acc:MGI:3781611]
ENSMUST00000053611	128.967	0.244608	0.160507	1.52397	0.127516	0.393116	156.369	127.83	136.055	115.199	112.671	125.68	Cox8c	ENSMUSG00000043319	cytochrome c oxidase subunit 8C [Source:MGI Symbol;Acc:MGI:1922733]
ENSMUST00000025804	64.5305	0.335873	0.220797	1.52119	0.128213	0.394729	68.299	68.9015	78.2537	70.6056	47.6239	53.499	Rab1b	ENSMUSG00000024870	RAB1B, member RAS oncogene family [Source:MGI Symbol;Acc:MGI:1923558]
ENSMUST00000048824	1359.02	0.229238	0.150879	1.51936	0.128673	0.395073	1709.27	1312.75	1379.22	1278.33	1098.83	1375.69	Gm5617	ENSMUSG00000042293	predicted gene 5617 [Source:MGI Symbol;Acc:MGI:3643566]
ENSMUST00000059666	163.157	0.217463	0.143102	1.51963	0.128603	0.395073	171.646	189.479	165.4	152.36	146.356	153.704	Saysd1	ENSMUSG00000045107	SAYSVFN motif domain containing 1 [Source:MGI Symbol;Acc:MGI:1914759]
ENSMUST00000040999	63.0253	0.346029	0.227989	1.51774	0.129079	0.395227	67.4003	66.1817	79.143	39.6383	60.4011	65.3877	Aox3	ENSMUSG00000064294	aldehyde oxidase 3 [Source:MGI Symbol;Acc:MGI:1918974]
ENSMUST00000059121	288.104	0.177191	0.116697	1.51839	0.128917	0.395227	300.156	300.084	318.35	272.513	246.25	291.272	Ubqlnl	ENSMUSG00000051437	ubiquilin-like [Source:MGI Symbol;Acc:MGI:2685336]
ENSMUST00000094897	384.005	0.179731	0.118541	1.51619	0.12947	0.395227	363.063	465.085	397.493	350.551	328.721	399.12	Dnaaf3	ENSMUSG00000055809	dynein, axonemal assembly factor 3 [Source:MGI Symbol;Acc:MGI:3588207]
ENSMUST00000151164	277.101	-0.183804	0.121266	-1.5157	0.129594	0.395227	294.764	239.342	244.543	292.332	292.713	298.915	Fam219aos	ENSMUSG00000036162	family with sequence similarity 219, member A, opposite strand [Source:MGI Symbol;Acc:MGI:1924242]
ENSMUST00000153600	108.234	-0.254767	0.16806	-1.51593	0.129537	0.395227	101.55	93.3797	101.374	115.199	117.317	120.585	Gm13402	ENSMUSG00000086994	predicted gene 13402 [Source:MGI Symbol;Acc:MGI:3649787]
ENSMUST00000056890	176.72	-0.206358	0.13684	-1.50803	0.131548	0.400647	156.369	164.094	171.625	193.236	188.173	186.822	Fbxl22	ENSMUSG00000050503	F-box and leucine-rich repeat protein 22 [Source:MGI Symbol;Acc:MGI:1921415]
ENSMUST00000055915	342.036	0.173726	0.115402	1.5054	0.132222	0.402162	353.178	349.041	385.044	361.699	282.259	320.994	Hdgfl1	ENSMUSG00000045835	HDGF like 1 [Source:MGI Symbol;Acc:MGI:1194493]
ENSMUST00000071926	430.864	-0.148736	0.0988991	-1.50392	0.132603	0.402484	413.389	419.755	392.158	457.079	464.623	438.182	Nol7	ENSMUSG00000063200	nucleolar protein 7 [Source:MGI Symbol;Acc:MGI:1917328]
ENSMUST00000190938	98.4008	-0.26777	0.178085	-1.50361	0.132683	0.402484	79.083	97.0061	91.5924	105.289	113.833	103.601	Gm28198	ENSMUSG00000101845	predicted gene 28198 [Source:MGI Symbol;Acc:MGI:5578904]
ENSMUST00000227540	3603.93	-0.112312	0.0748219	-1.50106	0.133341	0.403941	3277.45	3667.19	3444.05	3921.71	3779.71	3533.48	Tatdn1	ENSMUSG00000050891	TatD DNase domain containing 1 [Source:MGI Symbol;Acc:MGI:1916944]
ENSMUST00000019069	77.8125	0.294173	0.196731	1.4953	0.134835	0.404175	79.9817	84.3137	92.4817	71.8443	72.0166	66.2369	Heatr9	ENSMUSG00000018925	HEAT repeat containing 9 [Source:MGI Symbol;Acc:MGI:3650286]
ENSMUST00000038447	402.207	0.178113	0.119205	1.49417	0.135131	0.404175	451.133	370.799	461.519	354.267	344.983	430.54	Efhc1	ENSMUSG00000041809	EF-hand domain (C-terminal) containing 1 [Source:MGI Symbol;Acc:MGI:1919127]
ENSMUST00000048162	137.544	0.232379	0.155265	1.49666	0.134482	0.404175	143.787	146.869	153.84	136.256	132.418	112.093	Bsdc1	ENSMUSG00000040859	BSD domain containing 1 [Source:MGI Symbol;Acc:MGI:1913466]
ENSMUST00000052686	140.377	-0.232751	0.155637	-1.49547	0.134792	0.404175	145.585	117.858	123.605	163.508	140.549	151.156	H2afx	ENSMUSG00000049932	H2A histone family, member X [Source:MGI Symbol;Acc:MGI:102688]
ENSMUST00000103221	515.268	0.151726	0.101488	1.49501	0.134911	0.404175	598.515	527.64	502.424	457.079	491.339	514.61	Mtor	ENSMUSG00000028991	mechanistic target of rapamycin kinase [Source:MGI Symbol;Acc:MGI:1928394]
ENSMUST00000132394	1391.82	-0.130079	0.0867841	-1.49887	0.133906	0.404175	1323.74	1371.68	1288.52	1625.17	1426.39	1315.4	Gm12256	ENSMUSG00000087654	predicted gene 12256 [Source:MGI Symbol;Acc:MGI:3649604]
ENSMUST00000186216	66.9762	-0.341185	0.227715	-1.4983	0.134056	0.404175	62.907	58.9289	54.244	80.5152	91.7631	53.499	Gm29237	ENSMUSG00000101872	predicted gene 29237 [Source:MGI Symbol;Acc:MGI:5579943]
ENSMUST00000209895	382.828	-0.162961	0.109084	-1.49391	0.1352	0.404175	325.319	388.931	368.148	426.111	408.869	379.588	Grtp1	ENSMUSG00000038515	GH regulated TBC protein 1 [Source:MGI Symbol;Acc:MGI:1914040]
ENSMUST00000212917	480.78	-0.151204	0.100919	-1.49827	0.134063	0.404175	410.693	485.03	470.412	502.91	527.348	488.285	Gm45752	ENSMUSG00000110457	predicted gene 45752 [Source:MGI Symbol;Acc:MGI:5804867]
ENSMUST00000236582	121.469	-0.252312	0.168551	-1.49695	0.134406	0.404175	113.233	117.858	100.485	156.076	123.125	118.038	Gm50203	ENSMUSG00000118243	predicted gene, 50203 [Source:MGI Symbol;Acc:MGI:6302985]
ENSMUST00000094653	163.507	0.219681	0.14744	1.48997	0.136233	0.406728	175.241	158.655	194.745	136.256	155.649	160.497	Gtsf1l	ENSMUSG00000070708	gametocyte specific factor 1-like [Source:MGI Symbol;Acc:MGI:1915486]
ENSMUST00000197905	234.131	0.214691	0.144374	1.48704	0.137003	0.408488	214.782	312.777	226.758	218.01	221.858	210.599	Gm32051	ENSMUSG00000106438	predicted gene, 32051 [Source:MGI Symbol;Acc:MGI:5591210]
ENSMUST00000023747	96.1328	0.295315	0.198726	1.48604	0.13727	0.408747	79.083	123.297	114.713	84.2313	99.894	75.578	Nckap5l	ENSMUSG00000023009	NCK-associated protein 5-like [Source:MGI Symbol;Acc:MGI:3609653]
ENSMUST00000179367	71.8157	-0.334357	0.22624	-1.47789	0.139437	0.414657	44.9335	77.0609	68.472	68.1282	97.5709	74.7288	Gm8674	ENSMUSG00000093976	predicted gene 8674 [Source:MGI Symbol;Acc:MGI:3645762]
ENSMUST00000049520	128.066	0.242881	0.164681	1.47486	0.140251	0.416364	130.307	153.215	134.276	97.8569	121.964	130.775	1700049L16Rik	ENSMUSG00000043859	RIKEN cDNA 1700049L16 gene [Source:MGI Symbol;Acc:MGI:1920633]
ENSMUST00000204342	295.881	0.166861	0.113173	1.47438	0.140378	0.416364	327.116	301.897	310.347	265.081	288.067	282.78	Capza3	ENSMUSG00000041791	capping protein (actin filament) muscle Z-line, alpha 3 [Source:MGI Symbol;Acc:MGI:106221]
ENSMUST00000016144	123.569	-0.247553	0.168305	-1.47086	0.141329	0.417783	100.651	134.177	104.931	121.392	135.902	144.362	Plpp1	ENSMUSG00000021759	phospholipid phosphatase 1 [Source:MGI Symbol;Acc:MGI:108412]
ENSMUST00000048893	261.391	0.194185	0.132109	1.46988	0.141593	0.417783	255.222	261.1	321.907	244.023	216.05	270.043	1700013G24Rik	ENSMUSG00000041399	RIKEN cDNA 1700013G24 gene [Source:MGI Symbol;Acc:MGI:1916630]
ENSMUST00000052060	125.647	-0.234199	0.159246	-1.47067	0.14138	0.417783	108.739	121.484	115.602	137.495	144.033	126.529	Masp2	ENSMUSG00000028979	mannan-binding lectin serine peptidase 2 [Source:MGI Symbol;Acc:MGI:1330832]
ENSMUST00000156977	62.6328	0.334973	0.22789	1.46989	0.141592	0.417783	85.3737	68.9015	55.1333	59.4574	53.4317	53.499	4933404K08Rik	ENSMUSG00000085122	RIKEN cDNA 4933404K08 gene [Source:MGI Symbol;Acc:MGI:1921311]
ENSMUST00000153106	323.985	0.168061	0.114429	1.46869	0.141916	0.418191	330.711	380.771	317.461	310.913	291.551	312.502	Gm16130	ENSMUSG00000086624	predicted gene 16130 [Source:MGI Symbol;Acc:MGI:3801718]
ENSMUST00000206043	131.697	-0.236626	0.161351	-1.46653	0.142505	0.419382	124.915	108.792	128.052	142.45	160.295	125.68	Gm45025	ENSMUSG00000108489	predicted gene 45025 [Source:MGI Symbol;Acc:MGI:5753601]
ENSMUST00000214190	128.939	-0.246968	0.168496	-1.46572	0.142724	0.419483	114.131	106.072	132.498	136.256	164.941	119.736	Herpud2	ENSMUSG00000008429	HERPUD family member 2 [Source:MGI Symbol;Acc:MGI:1915393]
ENSMUST00000034239	114.072	-0.252366	0.172455	-1.46337	0.143365	0.420157	107.84	92.4731	111.156	121.392	142.872	108.696	Katnb1	ENSMUSG00000031787	katanin p80 (WD40-containing) subunit B 1 [Source:MGI Symbol;Acc:MGI:1921437]
ENSMUST00000100487	97.1625	-0.277799	0.189791	-1.46371	0.143274	0.420157	86.2724	89.7533	86.2569	106.528	130.095	84.0699	Eif2ak1	ENSMUSG00000029613	eukaryotic translation initiation factor 2 alpha kinase 1 [Source:MGI Symbol;Acc:MGI:1353448]
ENSMUST00000149702	112.26	-0.256627	0.17543	-1.46285	0.143509	0.420157	80.8804	114.231	112.045	121.392	118.479	126.529	Ift88os	ENSMUSG00000086486	intraflagellar transport 88, opposite strand [Source:MGI Symbol;Acc:MGI:1919181]
ENSMUST00000065562	97.9095	-0.266088	0.182081	-1.46137	0.143914	0.420258	84.4751	97.0061	84.4784	125.108	98.7325	97.6569	Socs4	ENSMUSG00000048379	suppressor of cytokine signaling 4 [Source:MGI Symbol;Acc:MGI:1914546]
ENSMUST00000166373	181.564	-0.205108	0.140295	-1.46198	0.143746	0.420258	154.571	165.908	184.963	213.056	182.365	188.52	C030005K15Rik	ENSMUSG00000079183	RIKEN cDNA C030005K15 gene [Source:MGI Symbol;Acc:MGI:3641867]
ENSMUST00000029252	221.094	0.211432	0.145066	1.4575	0.14498	0.422827	252.526	203.985	256.992	206.862	168.426	237.773	Lrrc34	ENSMUSG00000027702	leucine rich repeat containing 34 [Source:MGI Symbol;Acc:MGI:1919077]
ENSMUST00000000608	89.7581	0.271134	0.186556	1.45337	0.146122	0.423566	103.347	90.6599	101.374	71.8443	81.3091	90.0142	Gm2a	ENSMUSG00000000594	GM2 ganglioside activator protein [Source:MGI Symbol;Acc:MGI:95762]
ENSMUST00000002733	229.464	0.187916	0.129371	1.45253	0.146353	0.423566	266.905	222.117	243.654	232.875	199.788	211.448	Gtf2f1	ENSMUSG00000002658	general transcription factor IIF, polypeptide 1 [Source:MGI Symbol;Acc:MGI:1923848]
ENSMUST00000036854	82.3496	0.308252	0.212199	1.45266	0.146319	0.423566	88.9684	107.885	75.586	68.1282	94.0863	59.4433	Efhd2	ENSMUSG00000040659	EF hand domain containing 2 [Source:MGI Symbol;Acc:MGI:106504]
ENSMUST00000082428	348.377	0.180234	0.123921	1.45442	0.14583	0.423566	443.045	338.161	329.911	318.345	319.429	341.375	Sephs2	ENSMUSG00000049091	selenophosphate synthetase 2 [Source:MGI Symbol;Acc:MGI:108388]
ENSMUST00000180752	72.7354	-0.32515	0.223443	-1.45518	0.145619	0.423566	44.0349	76.1543	72.9182	84.2313	89.44	69.6336	Gm16973	ENSMUSG00000097743	predicted gene, 16973 [Source:MGI Symbol;Acc:MGI:4439897]
ENSMUST00000187467	338.038	0.325662	0.223707	1.45575	0.145461	0.423566	304.649	330.909	492.643	303.48	285.743	310.804	Ms4a14	ENSMUSG00000099398	membrane-spanning 4-domains, subfamily A, member 14 [Source:MGI Symbol;Acc:MGI:2686122]
ENSMUST00000230118	181.678	-0.226955	0.156416	-1.45097	0.146787	0.424281	177.038	184.946	140.501	161.03	234.635	191.917	Gm31462	ENSMUSG00000115976	predicted gene, 31462 [Source:MGI Symbol;Acc:MGI:5590621]
ENSMUST00000019441	216.763	0.203154	0.140273	1.44828	0.147539	0.425911	261.513	196.732	239.207	180.85	199.788	222.488	Nop9	ENSMUSG00000019297	NOP9 nucleolar protein [Source:MGI Symbol;Acc:MGI:1915092]
ENSMUST00000079306	79.382	0.301936	0.208735	1.4465	0.148036	0.426802	98.8538	67.0883	97.8171	65.6509	66.2088	80.6731	Lypd4	ENSMUSG00000062732	Ly6/Plaur domain containing 4 [Source:MGI Symbol;Acc:MGI:2687054]
ENSMUST00000127792	114.623	-0.240106	0.166433	-1.44266	0.149117	0.42903	94.3604	113.325	107.599	118.915	131.256	122.283	C330018A13Rik	ENSMUSG00000086655	RIKEN cDNA C330018A13 gene [Source:MGI Symbol;Acc:MGI:2444781]
ENSMUST00000181713	138.502	-0.219619	0.152258	-1.44241	0.149187	0.42903	133.003	121.484	128.941	148.643	157.972	140.966	Gm26717	ENSMUSG00000097363	predicted gene, 26717 [Source:MGI Symbol;Acc:MGI:5477211]
ENSMUST00000147420	532.283	0.136804	0.094972	1.44047	0.149734	0.429515	578.744	577.503	515.763	515.297	508.763	497.626	Chn1os3	ENSMUSG00000086544	chimerin 1, opposite strand 3 [Source:MGI Symbol;Acc:MGI:3705094]
ENSMUST00000198035	82.5675	-0.289542	0.200924	-1.44105	0.14957	0.429515	59.3123	87.0335	76.4752	101.573	80.1476	90.8634	Gm42893	ENSMUSG00000106415	predicted gene 42893 [Source:MGI Symbol;Acc:MGI:5663030]
ENSMUST00000172949	78.0147	-0.292123	0.203003	-1.43901	0.150147	0.429615	75.4883	67.9949	67.5828	66.8896	97.5709	92.5618	Pax5	ENSMUSG00000014030	paired box 5 [Source:MGI Symbol;Acc:MGI:97489]
ENSMUST00000203181	883.409	-0.121933	0.0847276	-1.43912	0.150117	0.429615	833.068	877.588	825.221	972.376	936.216	855.984	Gm44170	ENSMUSG00000107659	predicted gene, 44170 [Source:MGI Symbol;Acc:MGI:5690562]
ENSMUST00000056665	72.2753	0.311093	0.216361	1.43784	0.150478	0.43002	88.0697	87.9401	64.915	66.8896	51.1086	74.7288	Klhl11	ENSMUSG00000048732	kelch-like 11 [Source:MGI Symbol;Acc:MGI:2388648]
ENSMUST00000191069	102.379	-0.250748	0.175372	-1.42981	0.152773	0.436027	95.2591	103.352	81.8107	113.96	110.348	109.546	Tmem108	ENSMUSG00000042757	transmembrane protein 108 [Source:MGI Symbol;Acc:MGI:1932411]
ENSMUST00000030029	229.768	-0.202001	0.141488	-1.42768	0.153383	0.437218	169.849	248.408	222.312	263.842	238.12	236.075	Invs	ENSMUSG00000028344	inversin [Source:MGI Symbol;Acc:MGI:1335082]
ENSMUST00000026239	164.834	0.235986	0.165488	1.426	0.153868	0.438012	223.769	157.748	154.729	132.54	148.68	171.537	Poll	ENSMUSG00000025218	polymerase (DNA directed), lambda [Source:MGI Symbol;Acc:MGI:1889000]
ENSMUST00000109681	74.1479	-0.297604	0.208789	-1.42538	0.154047	0.438012	63.8056	54.3959	80.9215	84.2313	85.9553	75.578	Vwc2	ENSMUSG00000050830	von Willebrand factor C domain containing 2 [Source:MGI Symbol;Acc:MGI:2442987]
ENSMUST00000133476	66.4049	-0.299214	0.210075	-1.42432	0.154354	0.438334	55.7176	63.4619	59.5795	75.5604	68.532	75.578	Gm15857	ENSMUSG00000087063	predicted gene 15857 [Source:MGI Symbol;Acc:MGI:3801821]
ENSMUST00000042779	184.163	-0.204448	0.144004	-1.41974	0.155683	0.439379	153.673	173.16	185.853	226.681	175.395	190.219	Zbtb1	ENSMUSG00000033454	zinc finger and BTB domain containing 1 [Source:MGI Symbol;Acc:MGI:2442326]
ENSMUST00000092215	197.238	-0.201349	0.141731	-1.42064	0.155422	0.439379	162.659	194.012	194.745	178.372	231.15	222.488	Ccdc38	ENSMUSG00000036168	coiled-coil domain containing 38 [Source:MGI Symbol;Acc:MGI:2444738]
ENSMUST00000118036	72.1602	-0.302424	0.213017	-1.41972	0.15569	0.439379	55.7176	79.7807	57.801	86.7087	82.4707	70.4828	Tmed5	ENSMUSG00000063406	transmembrane p24 trafficking protein 5 [Source:MGI Symbol;Acc:MGI:1921586]
ENSMUST00000223490	84.2447	0.27771	0.195605	1.41975	0.15568	0.439379	86.2724	93.3797	96.0386	82.9926	84.7938	61.9909	Cdk13	ENSMUSG00000041297	cyclin-dependent kinase 13 [Source:MGI Symbol;Acc:MGI:1916812]
ENSMUST00000231902	205.791	-0.181851	0.127888	-1.42196	0.155037	0.439379	193.214	194.012	191.188	216.772	223.019	216.544	Gm5676	ENSMUSG00000116954	predicted gene 5676 [Source:MGI Symbol;Acc:MGI:3645537]
ENSMUST00000115817	77.2189	0.290214	0.205373	1.41311	0.157625	0.444286	92.5631	90.6599	71.1397	65.6509	81.3091	61.9909	Tpgs2	ENSMUSG00000024269	tubulin polyglutamylase complex subunit 2 [Source:MGI Symbol;Acc:MGI:1913898]
ENSMUST00000072578	376.412	0.153756	0.109066	1.40975	0.158613	0.444862	406.199	368.986	416.167	333.209	344.983	388.929	Ube2d2b	ENSMUSG00000063447	ubiquitin-conjugating enzyme E2D 2B [Source:MGI Symbol;Acc:MGI:1920568]
ENSMUST00000138762	369.002	0.157697	0.111803	1.41049	0.158395	0.444862	430.463	348.134	389.49	329.493	358.922	357.509	Cep350	ENSMUSG00000033671	centrosomal protein 350 [Source:MGI Symbol;Acc:MGI:1921331]
ENSMUST00000145163	182.685	0.204742	0.145221	1.40986	0.158581	0.444862	186.025	206.705	192.077	183.327	187.011	140.966	Gm13645	ENSMUSG00000085179	predicted gene 13645 [Source:MGI Symbol;Acc:MGI:3650945]
ENSMUST00000232364	145.847	-0.241049	0.170755	-1.41166	0.158049	0.444862	113.233	158.655	128.052	194.475	140.549	140.116	Tmem191c	ENSMUSG00000055692	transmembrane protein 191C [Source:MGI Symbol;Acc:MGI:107238]
ENSMUST00000172832	68.0975	0.305384	0.216772	1.40878	0.158901	0.445118	62.0083	88.8467	75.586	56.98	58.0779	67.0861	Trim39	ENSMUSG00000045409	tripartite motif-containing 39 [Source:MGI Symbol;Acc:MGI:1890659]
ENSMUST00000161204	116.362	-0.247396	0.175917	-1.40632	0.159629	0.446607	102.448	91.5665	126.273	112.721	120.802	144.362	Rdh11	ENSMUSG00000066441	retinol dehydrogenase 11 [Source:MGI Symbol;Acc:MGI:102581]
ENSMUST00000061934	69.0735	-0.302587	0.215492	-1.40417	0.160268	0.447427	70.995	63.4619	50.6871	73.083	88.2785	67.9353	Gm9812	ENSMUSG00000046747	predicted gene 9812 [Source:MGI Symbol;Acc:MGI:3708566]
ENSMUST00000119710	107.524	0.240558	0.171382	1.40364	0.160427	0.447427	124.915	110.605	114.713	94.1409	92.9247	107.847	4933405O20Rik	ENSMUSG00000084234	RIKEN cDNA 4933405O20 gene [Source:MGI Symbol;Acc:MGI:2142174]
ENSMUST00000205370	90.6161	-0.260494	0.185624	-1.40335	0.160514	0.447427	92.5631	75.2477	80.0322	89.1861	102.217	104.45	Particl	ENSMUSG00000108591	promoter of Mat2a antisense radiation induced circulating long non-coding RNA [Source:MGI Symbol;Acc:MGI:1925358]
ENSMUST00000020768	648.666	0.133013	0.0950153	1.39991	0.161539	0.447587	726.126	688.108	623.362	574.755	624.919	654.726	Pgam2	ENSMUSG00000020475	phosphoglycerate mutase 2 [Source:MGI Symbol;Acc:MGI:1933118]
ENSMUST00000034746	153.823	-0.211951	0.151291	-1.40095	0.161229	0.447587	152.774	148.682	127.162	144.927	171.911	177.481	Mns1	ENSMUSG00000032221	meiosis-specific nuclear structural protein 1 [Source:MGI Symbol;Acc:MGI:107933]
ENSMUST00000058232	274.012	-0.181413	0.129656	-1.39919	0.161757	0.447587	263.311	252.941	251.657	314.629	322.913	238.623	Xpa	ENSMUSG00000028329	xeroderma pigmentosum, complementation group A [Source:MGI Symbol;Acc:MGI:99135]
ENSMUST00000067664	115.907	0.245257	0.175409	1.3982	0.162053	0.447587	141.091	100.632	136.055	97.8569	106.863	112.942	Ywhae	ENSMUSG00000020849	tyrosine 3-monooxygenase/tryptophan 5-monooxygenase activation protein, epsilon polypeptide [Source:MGI Symbol;Acc:MGI:894689]
ENSMUST00000119848	2159.89	-0.112234	0.0802887	-1.39788	0.162149	0.447587	2077.73	2184	1963.46	2256.9	2413.72	2063.53	Eme2	ENSMUSG00000073436	essential meiotic structure-specific endonuclease subunit 2 [Source:MGI Symbol;Acc:MGI:1919889]
ENSMUST00000180464	474.836	-0.138435	0.0988963	-1.3998	0.161573	0.447587	447.538	434.261	473.079	494.239	531.994	467.904	Gm26596	ENSMUSG00000097185	predicted gene, 26596 [Source:MGI Symbol;Acc:MGI:5477090]
ENSMUST00000200255	120.047	0.230799	0.165059	1.39828	0.162028	0.447587	125.814	141.429	120.938	110.244	120.802	101.054	B230334C09Rik	ENSMUSG00000104597	RIKEN cDNA B230334C09 gene [Source:MGI Symbol;Acc:MGI:2442224]
ENSMUST00000201180	154.416	0.226323	0.161689	1.39974	0.161592	0.447587	174.342	187.666	136.055	159.792	146.356	122.283	Gm34411	ENSMUSG00000107087	predicted gene, 34411 [Source:MGI Symbol;Acc:MGI:5593570]
ENSMUST00000023501	85.2643	0.274128	0.196352	1.39611	0.162683	0.44797	110.537	80.6873	88.9247	69.3669	84.7938	77.2764	Maats1	ENSMUSG00000022805	MYCBP-associated, testis expressed 1 [Source:MGI Symbol;Acc:MGI:2443598]
ENSMUST00000032124	84.1153	-0.274614	0.19666	-1.39639	0.162599	0.44797	88.9684	74.3411	65.8043	79.2765	95.2478	101.054	Mrpl19	ENSMUSG00000030045	mitochondrial ribosomal protein L19 [Source:MGI Symbol;Acc:MGI:1926274]
ENSMUST00000052932	74.5747	0.293978	0.21081	1.39452	0.163162	0.448744	82.6777	78.8741	83.5892	86.7087	60.4011	55.1974	Pde12	ENSMUSG00000043702	phosphodiesterase 12 [Source:MGI Symbol;Acc:MGI:2443226]
ENSMUST00000121288	92.353	0.257085	0.184838	1.39087	0.164266	0.451235	113.233	99.7259	88.9247	85.47	80.1476	86.6174	Fam167a	ENSMUSG00000035095	family with sequence similarity 167, member A [Source:MGI Symbol;Acc:MGI:3606565]
ENSMUST00000020208	103.743	0.273492	0.196789	1.38977	0.164598	0.45139	118.625	99.7259	124.495	74.3217	81.3091	123.982	Fgd6	ENSMUSG00000020021	FYVE, RhoGEF and PH domain containing 6 [Source:MGI Symbol;Acc:MGI:1261419]
ENSMUST00000053830	72.267	0.281912	0.202906	1.38937	0.164721	0.45139	74.5897	85.2203	78.2537	66.8896	61.5626	67.0861	Hmgb4	ENSMUSG00000048686	high-mobility group box 4 [Source:MGI Symbol;Acc:MGI:1916567]
ENSMUST00000187024	101.332	-0.242897	0.175424	-1.38463	0.166164	0.454797	91.6644	92.4731	95.1494	106.528	99.894	122.283	Mast4	ENSMUSG00000034751	microtubule associated serine/threonine kinase family member 4 [Source:MGI Symbol;Acc:MGI:1918885]
ENSMUST00000161091	105.49	-0.237665	0.171838	-1.38307	0.166642	0.455264	97.0564	88.8467	104.042	120.153	114.994	107.847	Gm16168	ENSMUSG00000089941	predicted gene 16168 [Source:MGI Symbol;Acc:MGI:3802010]
ENSMUST00000217661	904.33	0.219717	0.158897	1.38277	0.166736	0.455264	922.935	854.016	1143.57	786.572	767.79	951.094	4932415D10Rik	ENSMUSG00000044581	RIKEN cDNA 4932415D10 gene [Source:MGI Symbol;Acc:MGI:3045298]
ENSMUST00000027517	78.7836	0.302291	0.219201	1.37906	0.167876	0.457825	83.5764	86.1269	93.3709	48.3091	66.2088	95.1094	Dgkd	ENSMUSG00000070738	diacylglycerol kinase, delta [Source:MGI Symbol;Acc:MGI:2138334]
ENSMUST00000015481	978.31	-0.116622	0.084652	-1.37766	0.168308	0.457903	974.159	979.127	861.68	1052.89	1027.98	974.022	Endog	ENSMUSG00000015337	endonuclease G [Source:MGI Symbol;Acc:MGI:1261433]
ENSMUST00000178958	713.267	0.136252	0.0988854	1.37787	0.168242	0.457903	682.091	850.39	707.84	663.941	715.52	659.821	A630023A22Rik	ENSMUSG00000095493	RIKEN cDNA A630023A22 gene [Source:MGI Symbol;Acc:MGI:2145657]
ENSMUST00000209340	862.949	-0.127537	0.0927588	-1.37494	0.169151	0.459646	754.883	913.852	803.879	947.602	917.631	839.85	Gm45552	ENSMUSG00000110279	predicted gene 45552 [Source:MGI Symbol;Acc:MGI:5791388]
ENSMUST00000110167	1036.78	0.137104	0.0999067	1.37232	0.169965	0.461305	1144.91	1127.81	981.728	1054.13	1066.31	845.794	Ndufa13	ENSMUSG00000036199	NADH:ubiquinone oxidoreductase subunit A13 [Source:MGI Symbol;Acc:MGI:1914434]
ENSMUST00000025635	192.168	0.19093	0.139391	1.36974	0.170767	0.461565	190.518	199.452	224.979	158.553	198.627	180.878	1700017D01Rik	ENSMUSG00000024729	RIKEN cDNA 1700017D01 gene [Source:MGI Symbol;Acc:MGI:1916619]
ENSMUST00000041569	95.2217	0.25216	0.184139	1.3694	0.170875	0.461565	114.131	93.3797	102.263	86.7087	97.5709	77.2764	Ccdc113	ENSMUSG00000036598	coiled-coil domain containing 113 [Source:MGI Symbol;Acc:MGI:3606076]
ENSMUST00000057481	90.5632	0.268576	0.196067	1.36982	0.170744	0.461565	101.55	79.7807	116.491	74.3217	77.8244	93.411	Nup160	ENSMUSG00000051329	nucleoporin 160 [Source:MGI Symbol;Acc:MGI:1926227]
ENSMUST00000153273	720.399	0.121649	0.0888296	1.36946	0.170855	0.461565	750.39	748.851	752.303	748.172	636.534	686.146	Lrrc37a	ENSMUSG00000078632	leucine rich repeat containing 37A [Source:MGI Symbol;Acc:MGI:2685097]
ENSMUST00000121230	108.296	-0.250079	0.182709	-1.36873	0.171083	0.461578	115.03	96.0995	84.4784	137.495	117.317	99.3553	Gm13543	ENSMUSG00000083745	predicted gene 13543 [Source:MGI Symbol;Acc:MGI:3649448]
ENSMUST00000180865	301.482	-0.156324	0.114461	-1.36575	0.172018	0.463551	292.068	278.326	283.67	322.061	341.498	291.272	Gm9917	ENSMUSG00000097099	predicted gene 9917 [Source:MGI Symbol;Acc:MGI:3704343]
ENSMUST00000025590	177.944	0.190257	0.139536	1.36349	0.172727	0.463807	195.012	176.787	198.302	156.076	161.457	180.028	Osbp	ENSMUSG00000024687	oxysterol binding protein [Source:MGI Symbol;Acc:MGI:97447]
ENSMUST00000042042	79.1484	-0.305513	0.224019	-1.36378	0.172637	0.463807	53.9202	87.0335	70.2505	96.6182	103.379	63.6893	Slc51a	ENSMUSG00000035699	solute carrier family 51, alpha subunit [Source:MGI Symbol;Acc:MGI:2146634]
ENSMUST00000042824	246.219	0.173163	0.126909	1.36447	0.17242	0.463807	262.412	244.782	277.445	225.443	209.081	258.154	Herc1	ENSMUSG00000038664	HECT and RLD domain containing E3 ubiquitin protein ligase family member 1 [Source:MGI Symbol;Acc:MGI:2384589]
ENSMUST00000032963	167.07	0.192247	0.141285	1.3607	0.173608	0.463852	187.822	171.347	176.071	146.166	157.972	163.045	Ppme1	ENSMUSG00000030718	protein phosphatase methylesterase 1 [Source:MGI Symbol;Acc:MGI:1919840]
ENSMUST00000093100	1412.82	0.117702	0.0865329	1.3602	0.173766	0.463852	1651.76	1396.16	1363.22	1327.88	1396.19	1341.72	Dnaaf1	ENSMUSG00000031831	dynein, axonemal assembly factor 1 [Source:MGI Symbol;Acc:MGI:1915520]
ENSMUST00000131501	78.525	-0.281646	0.206706	-1.36255	0.173025	0.463852	58.4136	75.2477	80.0322	73.083	82.4707	101.903	D030028A08Rik	ENSMUSG00000078700	RIKEN cDNA D030028A08 gene [Source:MGI Symbol;Acc:MGI:2441931]
ENSMUST00000225038	69.1746	0.284891	0.209364	1.36075	0.173594	0.463852	85.3737	73.4345	69.3612	56.98	66.2088	63.6893	Gm48105	ENSMUSG00000114630	predicted gene, 48105 [Source:MGI Symbol;Acc:MGI:6097456]
ENSMUST00000237788	64.7605	-0.314128	0.230641	-1.36198	0.173206	0.463852	60.2109	71.6213	41.7946	75.5604	60.4011	78.9747	Tkfc	ENSMUSG00000034371	triokinase, FMN cyclase [Source:MGI Symbol;Acc:MGI:2385084]
ENSMUST00000159117	150.025	-0.208048	0.153302	-1.35711	0.174745	0.465919	156.369	138.71	121.827	174.656	159.134	149.458	Hnrnpu	ENSMUSG00000039630	heterogeneous nuclear ribonucleoprotein U [Source:MGI Symbol;Acc:MGI:1858195]
ENSMUST00000137116	69.8262	-0.281647	0.208008	-1.35402	0.175731	0.467447	66.5016	67.9949	55.1333	70.6056	75.5013	83.2207	Utp23	ENSMUSG00000022313	UTP23 small subunit processome component [Source:MGI Symbol;Acc:MGI:1925831]
ENSMUST00000190666	133.467	-0.208617	0.154052	-1.3542	0.175672	0.467447	119.523	126.924	124.495	151.121	142.872	135.871	Snhg14	ENSMUSG00000100826	small nucleolar RNA host gene 14 [Source:MGI Symbol;Acc:MGI:1289201]
ENSMUST00000125333	213.686	-0.195089	0.144187	-1.35303	0.176048	0.467742	229.161	200.358	167.178	225.443	257.866	202.107	Man2c1os	ENSMUSG00000086728	mannosidase, alpha, class 2C, member 1, opposite strand [Source:MGI Symbol;Acc:MGI:1924044]
ENSMUST00000150613	62.1707	-0.310907	0.229906	-1.35233	0.176271	0.467788	43.1362	71.6213	51.5763	73.083	67.3704	66.2369	Gm15545	ENSMUSG00000087138	predicted gene 15545 [Source:MGI Symbol;Acc:MGI:3782994]
ENSMUST00000034228	86.3638	0.264565	0.196086	1.34923	0.177262	0.469869	84.4751	93.3797	105.82	61.9348	85.9553	86.6174	Arl2bp	ENSMUSG00000031776	ADP-ribosylation factor-like 2 binding protein [Source:MGI Symbol;Acc:MGI:1349429]
ENSMUST00000099276	235.157	-0.174125	0.129215	-1.34756	0.177799	0.470742	241.742	209.424	213.419	232.875	235.796	277.685	Atxn7l3b	ENSMUSG00000074748	ataxin 7-like 3B [Source:MGI Symbol;Acc:MGI:1914971]
ENSMUST00000062252	233.328	0.165263	0.122967	1.34396	0.178961	0.47122	250.729	246.595	241.875	224.204	227.666	208.901	Gm9828	ENSMUSG00000048603	predicted gene 9828 [Source:MGI Symbol;Acc:MGI:3642913]
ENSMUST00000182145	398.617	0.146428	0.108967	1.34379	0.179018	0.47122	448.437	432.448	374.373	382.757	399.576	354.113	Gm27045	ENSMUSG00000098211	predicted gene, 27045 [Source:MGI Symbol;Acc:MGI:5504160]
ENSMUST00000195134	82.9488	0.263407	0.195862	1.34486	0.178669	0.47122	94.3604	77.9675	99.5956	78.0378	66.2088	81.5223	Gm37915	ENSMUSG00000103270	predicted gene, 37915 [Source:MGI Symbol;Acc:MGI:5611143]
ENSMUST00000217945	121.236	-0.24001	0.178482	-1.34473	0.178712	0.47122	95.2591	112.418	124.495	163.508	119.641	112.093	Gm35206	ENSMUSG00000112304	predicted gene, 35206 [Source:MGI Symbol;Acc:MGI:5594365]
ENSMUST00000237282	909.505	-0.116421	0.0865195	-1.3456	0.17843	0.47122	921.138	905.692	791.43	931.499	975.709	931.562	Gm50163	ENSMUSG00000118030	predicted gene, 50163 [Source:MGI Symbol;Acc:MGI:6302925]
ENSMUST00000090558	76.8659	-0.268707	0.200095	-1.34289	0.179306	0.471431	68.299	70.7147	71.1397	75.5604	77.8244	97.6569	Celsr2	ENSMUSG00000068740	cadherin, EGF LAG seven-pass G-type receptor 2 [Source:MGI Symbol;Acc:MGI:1858235]
ENSMUST00000026927	387.971	-0.142666	0.106447	-1.34026	0.180162	0.473135	338.799	362.639	404.607	411.247	408.869	401.667	Nudt5	ENSMUSG00000025817	nudix (nucleoside diphosphate linked moiety X)-type motif 5 [Source:MGI Symbol;Acc:MGI:1858232]
ENSMUST00000002298	192.127	0.389307	0.291373	1.33611	0.181513	0.475051	292.068	173.16	188.52	135.018	200.95	163.045	Ppm1j	ENSMUSG00000002228	protein phosphatase 1J [Source:MGI Symbol;Acc:MGI:1919137]
ENSMUST00000008991	167.211	-0.216033	0.161758	-1.33553	0.181701	0.475051	124.017	181.32	159.175	151.121	206.757	180.878	Sptbn2	ENSMUSG00000067889	spectrin beta, non-erythrocytic 2 [Source:MGI Symbol;Acc:MGI:1313261]
ENSMUST00000059279	175.671	0.225744	0.168852	1.33693	0.181244	0.475051	177.038	167.721	225.869	130.063	148.68	204.655	Gm884	ENSMUSG00000034239	predicted gene 884 [Source:MGI Symbol;Acc:MGI:2685730]
ENSMUST00000101432	96.9646	-0.239348	0.179227	-1.33545	0.181729	0.475051	90.7657	96.0995	80.0322	111.483	96.4094	106.998	Npas3	ENSMUSG00000021010	neuronal PAS domain protein 3 [Source:MGI Symbol;Acc:MGI:1351610]
ENSMUST00000025617	205.318	0.177153	0.132764	1.33434	0.182091	0.475426	237.249	213.051	203.637	179.611	205.596	192.766	Rfk	ENSMUSG00000024712	riboflavin kinase [Source:MGI Symbol;Acc:MGI:1914688]
ENSMUST00000122404	304.773	0.153778	0.115299	1.33373	0.182292	0.475426	308.244	348.134	305.901	309.674	276.451	280.233	Gm14150	ENSMUSG00000082809	predicted gene 14150 [Source:MGI Symbol;Acc:MGI:3651006]
ENSMUST00000219361	190.262	-0.188168	0.141198	-1.33265	0.182646	0.475801	203.998	168.627	160.064	211.817	210.242	186.822	Gm18622	ENSMUSG00000112916	predicted gene, 18622 [Source:MGI Symbol;Acc:MGI:5010807]
ENSMUST00000052277	200.299	0.202434	0.152153	1.33046	0.183368	0.477134	224.668	169.534	249.878	182.088	168.426	207.203	Iqub	ENSMUSG00000046192	IQ motif and ubiquitin domain containing [Source:MGI Symbol;Acc:MGI:3041159]
ENSMUST00000025217	190.784	0.209784	0.157774	1.32965	0.183635	0.477283	248.932	184.946	181.406	142.45	191.657	195.314	Hspa9	ENSMUSG00000024359	heat shock protein 9 [Source:MGI Symbol;Acc:MGI:96245]
ENSMUST00000225259	147.949	0.226372	0.17059	1.327	0.184509	0.479006	190.518	152.309	135.166	120.153	167.264	122.283	Slc34a1	ENSMUSG00000021490	solute carrier family 34 (sodium phosphate), member 1 [Source:MGI Symbol;Acc:MGI:1345284]
ENSMUST00000002171	77.1932	0.276908	0.20913	1.32409	0.185472	0.479811	103.347	70.7147	79.143	68.1282	78.986	62.8401	Psmc3	ENSMUSG00000002102	proteasome (prosome, macropain) 26S subunit, ATPase 3 [Source:MGI Symbol;Acc:MGI:1098754]
ENSMUST00000042753	96.4415	0.247082	0.186592	1.32419	0.185442	0.479811	99.7525	125.111	88.9247	91.6635	88.2785	84.9191	Rbm48	ENSMUSG00000040302	RNA binding motif protein 48 [Source:MGI Symbol;Acc:MGI:2442653]
ENSMUST00000189788	643.705	0.136366	0.103033	1.32351	0.185665	0.479811	638.056	636.432	750.524	551.219	607.495	678.503	Ldhal6b	ENSMUSG00000101959	lactate dehydrogenase A-like 6B [Source:MGI Symbol;Acc:MGI:2146830]
ENSMUST00000196562	182.358	-0.194764	0.146993	-1.32499	0.185176	0.479811	183.329	188.573	137.833	205.623	192.819	185.973	Gm43361	ENSMUSG00000106375	predicted gene 43361 [Source:MGI Symbol;Acc:MGI:5663498]
ENSMUST00000059833	363.596	0.311981	0.235972	1.32211	0.186133	0.480473	422.375	339.068	448.18	281.184	272.966	417.802	Fscb	ENSMUSG00000043060	fibrous sheath CABYR binding protein [Source:MGI Symbol;Acc:MGI:3646964]
ENSMUST00000174756	77.7893	0.260967	0.197644	1.32039	0.186704	0.481017	85.3737	92.4731	76.4752	68.1282	75.5013	68.7844	Gm20463	ENSMUSG00000092395	predicted gene 20463 [Source:MGI Symbol;Acc:MGI:5141928]
ENSMUST00000175987	149.623	-0.201888	0.152922	-1.3202	0.186768	0.481017	130.307	160.468	127.162	148.643	167.264	163.894	Has3	ENSMUSG00000031910	hyaluronan synthase 3 [Source:MGI Symbol;Acc:MGI:109599]
ENSMUST00000221468	264.158	-0.185135	0.140319	-1.31939	0.187038	0.481168	227.364	292.831	219.644	319.583	286.905	238.623	Gm6566	ENSMUSG00000113918	predicted gene 6566 [Source:MGI Symbol;Acc:MGI:3647745]
ENSMUST00000170883	91.8673	-0.276774	0.210024	-1.31782	0.187564	0.481973	97.9551	55.3025	96.0386	86.7087	114.994	100.204	Hdlbp	ENSMUSG00000034088	high density lipoprotein (HDL) binding protein [Source:MGI Symbol;Acc:MGI:99256]
ENSMUST00000048129	79.4213	-0.262365	0.199189	-1.31717	0.187783	0.48199	78.1844	61.6487	77.3645	86.7087	76.6629	95.9585	Piwil2	ENSMUSG00000033644	piwi-like RNA-mediated gene silencing 2 [Source:MGI Symbol;Acc:MGI:1930036]
ENSMUST00000023491	109.23	-0.234166	0.178001	-1.31553	0.188333	0.482214	88.0697	97.9127	115.602	99.0956	132.418	122.283	Lrch3	ENSMUSG00000022801	leucine-rich repeats and calponin homology (CH) domain containing 3 [Source:MGI Symbol;Acc:MGI:1917394]
ENSMUST00000049948	712.65	0.125543	0.095561	1.31374	0.188933	0.482214	811.5	708.054	714.065	635.451	662.088	744.74	Asrgl1	ENSMUSG00000024654	asparaginase like 1 [Source:MGI Symbol;Acc:MGI:1913764]
ENSMUST00000143819	570.901	-0.13163	0.100175	-1.314	0.188846	0.482214	487.08	581.13	564.672	615.632	624.919	551.974	Brip1os	ENSMUSG00000085208	BRCA1 interacting protein C-terminal helicase 1, opposite strand [Source:MGI Symbol;Acc:MGI:1921288]
ENSMUST00000156249	62.0078	-0.31081	0.23652	-1.3141	0.188814	0.482214	60.2109	47.1431	57.801	65.6509	89.44	51.8006	Ubc	ENSMUSG00000008348	ubiquitin C [Source:MGI Symbol;Acc:MGI:98889]
ENSMUST00000212287	274.938	0.291847	0.221758	1.31606	0.188155	0.482214	284.879	299.178	325.464	220.488	198.627	320.994	Gm11639	ENSMUSG00000040838	predicted gene 11639 [Source:MGI Symbol;Acc:MGI:3651790]
ENSMUST00000183512	112.426	-0.217522	0.165678	-1.31292	0.189209	0.482377	108.739	99.7259	103.153	127.586	117.317	118.038	Gm10603	ENSMUSG00000099137	predicted gene 10603 [Source:MGI Symbol;Acc:MGI:3642592]
ENSMUST00000037025	329.22	-0.17278	0.132435	-1.30464	0.192017	0.488986	332.508	281.046	312.126	397.621	375.183	276.836	Kdm1b	ENSMUSG00000038080	lysine (K)-specific demethylase 1B [Source:MGI Symbol;Acc:MGI:2145261]
ENSMUST00000131874	70.0611	-0.285769	0.219317	-1.303	0.192576	0.489311	75.4883	50.7695	62.2473	89.1861	78.986	63.6893	Gm16220	ENSMUSG00000085662	predicted gene 16220 [Source:MGI Symbol;Acc:MGI:3802166]
ENSMUST00000204314	285.505	-0.161842	0.124164	-1.30345	0.192421	0.489311	262.412	259.287	284.559	319.583	329.883	257.305	Gm44317	ENSMUSG00000108282	predicted gene, 44317 [Source:MGI Symbol;Acc:MGI:5690709]
ENSMUST00000165885	202.141	-0.179838	0.138213	-1.30116	0.193204	0.490357	195.91	201.265	171.625	189.52	243.927	210.599	Gm17023	ENSMUSG00000091443	predicted gene 17023 [Source:MGI Symbol;Acc:MGI:4937850]
ENSMUST00000096259	741.779	-0.207014	0.159461	-1.29821	0.194215	0.491825	569.757	755.197	739.853	879.474	804.96	701.431	Gng3	ENSMUSG00000071658	guanine nucleotide binding protein (G protein), gamma 3 [Source:MGI Symbol;Acc:MGI:102704]
ENSMUST00000219485	78.5411	0.29446	0.226716	1.2988	0.194012	0.491825	106.043	69.8081	85.3677	48.3091	70.8551	90.8634	Gm6729	ENSMUSG00000112586	predicted gene 6729 [Source:MGI Symbol;Acc:MGI:3646339]
ENSMUST00000192285	212.813	-0.169059	0.130399	-1.29647	0.194815	0.492243	192.316	216.677	192.077	240.307	207.919	227.583	Gm38155	ENSMUSG00000104245	predicted gene, 38155 [Source:MGI Symbol;Acc:MGI:5611383]
ENSMUST00000205568	64.1332	-0.298229	0.230027	-1.2965	0.194805	0.492243	45.8322	52.5827	74.6967	60.6961	72.0166	78.9747	Maz	ENSMUSG00000030678	MYC-associated zinc finger protein (purine-binding transcription factor) [Source:MGI Symbol;Acc:MGI:1338823]
ENSMUST00000069476	105.086	0.226016	0.17459	1.29455	0.195475	0.493363	112.334	126.924	100.485	96.6182	99.894	94.2602	Rtl6	ENSMUSG00000055745	retrotransposon Gag like 6 [Source:MGI Symbol;Acc:MGI:2675858]
ENSMUST00000034371	294.307	0.17258	0.13346	1.29312	0.195969	0.494059	354.975	258.381	323.686	277.468	243.927	307.407	Dpep3	ENSMUSG00000031898	dipeptidase 3 [Source:MGI Symbol;Acc:MGI:1919104]
ENSMUST00000165413	120.713	0.226431	0.175373	1.29114	0.196656	0.49524	126.713	106.979	156.507	122.631	101.056	110.395	Stk35	ENSMUSG00000037885	serine/threonine kinase 35 [Source:MGI Symbol;Acc:MGI:1914583]
ENSMUST00000174324	88.6421	-0.236049	0.183034	-1.28964	0.197175	0.495997	81.779	79.7807	82.6999	92.9022	98.7325	95.9585	Mtx1	ENSMUSG00000064068	metaxin 1 [Source:MGI Symbol;Acc:MGI:103025]
ENSMUST00000177314	802.894	0.117623	0.0913286	1.28791	0.197778	0.496964	858.231	860.362	785.205	826.21	791.021	696.336	Gm20652	ENSMUSG00000093390	predicted gene 20652 [Source:MGI Symbol;Acc:MGI:5313099]
ENSMUST00000181449	76.0459	0.25905	0.201297	1.2869	0.198128	0.497293	84.4751	79.7807	85.3677	59.4574	67.3704	79.8239	Gm26611	ENSMUSG00000097677	predicted gene, 26611 [Source:MGI Symbol;Acc:MGI:5477105]
ENSMUST00000038073	64.3234	0.321461	0.250471	1.28343	0.199343	0.49791	87.1711	44.4233	83.5892	52.0252	49.947	68.7844	Catsper2	ENSMUSG00000033486	cation channel, sperm associated 2 [Source:MGI Symbol;Acc:MGI:2387404]
ENSMUST00000057416	177.115	-0.187723	0.146518	-1.28123	0.200113	0.49791	178.835	143.243	175.182	164.746	207.919	192.766	Tmem251	ENSMUSG00000046675	transmembrane protein 251 [Source:MGI Symbol;Acc:MGI:2443862]
ENSMUST00000116514	235.874	0.163725	0.127792	1.28118	0.200129	0.49791	244.438	242.968	261.439	230.397	193.98	242.019	Wbp11	ENSMUSG00000030216	WW domain binding protein 11 [Source:MGI Symbol;Acc:MGI:1891823]
ENSMUST00000118782	91.3712	-0.24867	0.193504	-1.28509	0.198762	0.49791	73.691	84.3137	91.5924	96.6182	119.641	82.3715	Gm13863	ENSMUSG00000082446	predicted gene 13863 [Source:MGI Symbol;Acc:MGI:3652088]
ENSMUST00000172588	141.561	-0.197825	0.154216	-1.28278	0.19957	0.49791	137.497	135.99	122.716	158.553	132.418	162.195	Gm20536	ENSMUSG00000092386	predicted gene 20536 [Source:MGI Symbol;Acc:MGI:5142001]
ENSMUST00000187897	88.3702	0.240673	0.187594	1.28294	0.199513	0.49791	95.2591	102.446	88.9247	91.6635	75.5013	76.4272	1700018L02Rik	ENSMUSG00000100075	RIKEN cDNA 1700018L02 gene [Source:MGI Symbol;Acc:MGI:1914579]
ENSMUST00000213677	76.7609	-0.278694	0.217343	-1.28228	0.199745	0.49791	65.603	73.4345	67.5828	96.6182	98.7325	58.5942	D830035M03Rik	ENSMUSG00000111828	RIKEN cDNA D830035M03 gene [Source:MGI Symbol;Acc:MGI:2686558]
ENSMUST00000220468	75.5387	-0.262832	0.205137	-1.28125	0.200104	0.49791	70.0963	56.2091	80.0322	74.3217	85.9553	86.6174	Gstz1	ENSMUSG00000021033	glutathione transferase zeta 1 (maleylacetoacetate isomerase) [Source:MGI Symbol;Acc:MGI:1341859]
ENSMUST00000160110	424.243	-0.144444	0.113003	-1.27824	0.201167	0.49944	390.023	408.876	407.275	514.059	441.392	383.834	Phtf1os	ENSMUSG00000089998	putative homeodomain transcription factor 1, opposite strand [Source:MGI Symbol;Acc:MGI:3698050]
ENSMUST00000183865	144.425	0.189553	0.148298	1.27818	0.201185	0.49944	152.774	157.748	151.172	136.256	133.579	135.021	Gm27884	ENSMUSG00000099232	predicted gene, 27884 [Source:MGI Symbol;Acc:MGI:5531266]
ENSMUST00000088246	1773.18	0.1867	0.146204	1.27698	0.201608	0.499944	2243.08	1729.79	1691.35	1600.39	1584.37	1790.09	Tuba3a	ENSMUSG00000067702	tubulin, alpha 3A [Source:MGI Symbol;Acc:MGI:1095406]
ENSMUST00000165458	222.562	-0.167056	0.131032	-1.27492	0.202336	0.501202	211.188	228.463	188.52	236.591	253.22	217.393	Gm17477	ENSMUSG00000084917	predicted gene, 17477 [Source:MGI Symbol;Acc:MGI:4937111]
ENSMUST00000125186	68.9005	-0.269765	0.211766	-1.27389	0.202704	0.501565	66.5016	60.7421	59.5795	90.4248	67.3704	68.7844	B230398E01Rik	ENSMUSG00000087660	RIKEN cDNA B230398E01 gene [Source:MGI Symbol;Acc:MGI:1925930]
ENSMUST00000088653	110.389	0.227034	0.178521	1.27175	0.203463	0.502896	115.929	135.99	104.931	90.4248	120.802	94.2602	Ccdc87	ENSMUSG00000067872	coiled-coil domain containing 87 [Source:MGI Symbol;Acc:MGI:3026882]
ENSMUST00000141964	254.466	-0.160832	0.126584	-1.27056	0.203885	0.503391	267.804	229.369	222.312	288.616	274.128	244.567	Gm14024	ENSMUSG00000085485	predicted gene 14024 [Source:MGI Symbol;Acc:MGI:3649704]
ENSMUST00000058550	120.015	0.21398	0.169187	1.26476	0.205959	0.507957	135.699	110.605	139.612	126.347	103.379	104.45	Ccni	ENSMUSG00000063015	cyclin I [Source:MGI Symbol;Acc:MGI:1341077]
ENSMUST00000025728	113.941	0.209806	0.166078	1.2633	0.206483	0.508697	128.51	117.858	120.048	100.334	114.994	101.903	Frmd8	ENSMUSG00000024816	FERM domain containing 8 [Source:MGI Symbol;Acc:MGI:1914707]
ENSMUST00000037915	72.2217	0.275339	0.218487	1.26021	0.207595	0.509225	90.7657	70.7147	77.3645	52.0252	59.2395	83.2207	Msl1	ENSMUSG00000052915	male specific lethal 1 [Source:MGI Symbol;Acc:MGI:1921276]
ENSMUST00000049031	165.115	0.193278	0.153309	1.26071	0.207412	0.509225	163.558	180.413	182.296	179.611	159.134	125.68	Mindy2	ENSMUSG00000042444	MINDY lysine 48 deubiquitinase 2 [Source:MGI Symbol;Acc:MGI:2443086]
ENSMUST00000114094	107.595	0.22438	0.177865	1.26152	0.207122	0.509225	126.713	102.446	120.048	87.9474	92.9247	115.49	Mdh1b	ENSMUSG00000025963	malate dehydrogenase 1B, NAD (soluble) [Source:MGI Symbol;Acc:MGI:1923918]
ENSMUST00000180906	133.645	0.209055	0.165766	1.26115	0.207256	0.509225	141.091	170.441	118.27	126.347	124.287	121.434	1110046J04Rik	ENSMUSG00000085457	RIKEN cDNA 1110046J04 gene [Source:MGI Symbol;Acc:MGI:1916058]
ENSMUST00000094424	75.306	0.27267	0.216535	1.25924	0.207943	0.509527	66.5016	104.259	77.3645	63.1735	61.5626	78.9747	Spaca4	ENSMUSG00000070563	sperm acrosome associated 4 [Source:MGI Symbol;Acc:MGI:1916613]
ENSMUST00000197317	102.282	-0.236242	0.188179	-1.25541	0.209329	0.512371	108.739	74.3411	97.8171	130.063	103.379	99.3553	Gm43140	ENSMUSG00000105286	predicted gene 43140 [Source:MGI Symbol;Acc:MGI:5663277]
ENSMUST00000053876	82.3307	0.241981	0.193125	1.25298	0.210214	0.513982	94.3604	82.5005	91.5924	70.6056	70.8551	84.0699	G6pd2	ENSMUSG00000089992	glucose-6-phosphate dehydrogenase 2 [Source:MGI Symbol;Acc:MGI:105977]
ENSMUST00000192957	110.404	-0.228012	0.182117	-1.25201	0.210566	0.514289	104.246	92.4731	106.71	132.54	134.741	91.7126	Gm36937	ENSMUSG00000102413	predicted gene, 36937 [Source:MGI Symbol;Acc:MGI:5610165]
ENSMUST00000041804	135.063	-0.207624	0.166295	-1.24853	0.211837	0.516838	136.598	108.792	130.719	121.392	171.911	140.966	Lmtk2	ENSMUSG00000038970	lemur tyrosine kinase 2 [Source:MGI Symbol;Acc:MGI:3036247]
ENSMUST00000034856	117.164	0.212926	0.170658	1.24768	0.21215	0.517044	143.787	109.698	124.495	110.244	97.5709	117.188	Mpi	ENSMUSG00000032306	mannose phosphate isomerase [Source:MGI Symbol;Acc:MGI:97075]
ENSMUST00000102909	170.367	0.181312	0.145686	1.24454	0.213301	0.519159	195.012	180.413	166.289	168.463	171.911	140.116	Sun3	ENSMUSG00000040985	Sad1 and UNC84 domain containing 3 [Source:MGI Symbol;Acc:MGI:3041199]
ENSMUST00000128125	71.5134	-0.26728	0.214844	-1.24407	0.213475	0.519159	71.8937	56.2091	65.8043	97.8569	68.532	68.7844	Gm10658	ENSMUSG00000074284	predicted gene 10658 [Source:MGI Symbol;Acc:MGI:3642856]
ENSMUST00000002121	96.5577	-0.225515	0.181518	-1.24239	0.214094	0.520107	97.9551	76.1543	93.3709	96.6182	105.702	109.546	Supt6	ENSMUSG00000002052	SPT6, histone chaperone and transcription elongation factor [Source:MGI Symbol;Acc:MGI:107726]
ENSMUST00000209921	90.5806	0.235555	0.189948	1.2401	0.214939	0.521599	105.144	104.259	83.5892	94.1409	82.4707	73.8796	Gm8096	ENSMUSG00000110372	predicted gene 8096 [Source:MGI Symbol;Acc:MGI:3645752]
ENSMUST00000026170	170.525	0.180099	0.145316	1.23937	0.21521	0.521701	189.62	158.655	195.634	164.746	146.356	168.14	Ubtd1	ENSMUSG00000025171	ubiquitin domain containing 1 [Source:MGI Symbol;Acc:MGI:2385092]
ENSMUST00000137154	132.761	-0.190796	0.154657	-1.23367	0.217326	0.526267	126.713	118.764	126.273	151.121	133.579	140.116	Dhx58os	ENSMUSG00000085604	DEAH (Asp-Glu-Ala-His) box polypeptide 58, opposite strand [Source:MGI Symbol;Acc:MGI:3705104]
ENSMUST00000031624	118.973	0.202757	0.165029	1.22862	0.219215	0.528024	142.889	117.858	120.938	113.96	110.348	107.847	1700018F24Rik	ENSMUSG00000029620	RIKEN cDNA 1700018F24 gene [Source:MGI Symbol;Acc:MGI:1916646]
ENSMUST00000034388	131.216	0.197256	0.160441	1.22946	0.2189	0.528024	132.105	144.149	144.947	102.812	135.902	127.379	Vps4a	ENSMUSG00000031913	vacuolar protein sorting 4A [Source:MGI Symbol;Acc:MGI:1890520]
ENSMUST00000148844	85.5172	0.231245	0.188109	1.22931	0.218955	0.528024	88.9684	89.7533	98.7064	79.2765	73.1782	83.2207	Gm12523	ENSMUSG00000084863	predicted gene 12523 [Source:MGI Symbol;Acc:MGI:3649602]
ENSMUST00000183690	95.7504	-0.234813	0.191083	-1.22885	0.219129	0.528024	88.0697	73.4345	101.374	106.528	118.479	86.6174	Strbp	ENSMUSG00000026915	spermatid perinuclear RNA binding protein [Source:MGI Symbol;Acc:MGI:104626]
ENSMUST00000222885	378.616	-0.136976	0.111337	-1.23028	0.218592	0.528024	387.327	381.678	313.015	386.473	410.03	393.175	Gstz1	ENSMUSG00000021033	glutathione transferase zeta 1 (maleylacetoacetate isomerase) [Source:MGI Symbol;Acc:MGI:1341859]
ENSMUST00000209836	164.376	-0.180625	0.147432	-1.22514	0.220523	0.530613	140.193	177.693	144.058	174.656	182.365	167.291	Gm45606	ENSMUSG00000109715	predicted gene 45606 [Source:MGI Symbol;Acc:MGI:5791442]
ENSMUST00000228100	377.763	0.132826	0.108505	1.22415	0.220896	0.530946	403.503	420.662	360.145	385.234	353.114	343.922	D730044K07Rik	ENSMUSG00000115685	RIKEN cDNA D730044K07 gene [Source:MGI Symbol;Acc:MGI:1925101]
ENSMUST00000057438	110.88	-0.204943	0.168206	-1.2184	0.223071	0.533902	98.8538	103.352	107.599	115.199	110.348	129.926	Vcpip1	ENSMUSG00000045210	valosin containing protein (p97)/p47 complex interacting protein 1 [Source:MGI Symbol;Acc:MGI:1917925]
ENSMUST00000106529	69.6281	-0.251032	0.206176	-1.21756	0.22339	0.533902	68.299	61.6487	60.4688	75.5604	81.3091	70.4828	Acsm3	ENSMUSG00000030935	acyl-CoA synthetase medium-chain family member 3 [Source:MGI Symbol;Acc:MGI:99538]
ENSMUST00000141810	89.1902	-0.248974	0.204305	-1.21864	0.22298	0.533902	88.9684	64.3685	89.8139	112.721	104.54	74.7288	Gm15774	ENSMUSG00000085118	predicted gene 15774 [Source:MGI Symbol;Acc:MGI:3783215]
ENSMUST00000146532	140.893	0.191656	0.15746	1.21717	0.223538	0.533902	173.443	138.71	138.722	137.495	121.964	135.021	Gm13070	ENSMUSG00000086767	predicted gene 13070 [Source:MGI Symbol;Acc:MGI:3651970]
ENSMUST00000180922	76.2852	-0.247694	0.203313	-1.21829	0.223113	0.533902	75.4883	74.3411	59.5795	71.8443	94.0863	82.3715	Gm26672	ENSMUSG00000097330	predicted gene, 26672 [Source:MGI Symbol;Acc:MGI:5477166]
ENSMUST00000205621	92.0131	-0.231976	0.190422	-1.21822	0.22314	0.533902	79.083	102.446	72.029	99.0956	106.863	92.5618	Gm44850	ENSMUSG00000108604	predicted gene 44850 [Source:MGI Symbol;Acc:MGI:5753426]
ENSMUST00000022690	100.508	0.219852	0.180912	1.21524	0.224275	0.533977	102.448	117.858	103.153	92.9022	106.863	79.8239	Fam160b2	ENSMUSG00000022095	family with sequence similarity 160, member B2 [Source:MGI Symbol;Acc:MGI:3036290]
ENSMUST00000219889	64.913	-0.262485	0.215828	-1.21618	0.223918	0.533977	53.0216	61.6487	62.2473	80.5152	61.5626	70.4828	Cep290	ENSMUSG00000019971	centrosomal protein 290 [Source:MGI Symbol;Acc:MGI:2384917]
ENSMUST00000233041	105.935	-0.217176	0.178693	-1.21536	0.22423	0.533977	96.1578	112.418	84.4784	123.87	118.479	100.204	Gm20742	ENSMUSG00000117296	predicted gene, 20742 [Source:MGI Symbol;Acc:MGI:5434098]
ENSMUST00000078830	155.668	-0.186015	0.153189	-1.21428	0.224641	0.534288	125.814	154.122	156.507	154.837	188.173	154.553	Rtn4	ENSMUSG00000020458	reticulon 4 [Source:MGI Symbol;Acc:MGI:1915835]
ENSMUST00000183332	63.8826	-0.269355	0.222154	-1.21246	0.225334	0.535376	50.3256	70.7147	53.3548	66.8896	63.8857	78.1255	Rbm4b	ENSMUSG00000033760	RNA binding motif protein 4B [Source:MGI Symbol;Acc:MGI:1913954]
ENSMUST00000039480	104.522	0.209045	0.172605	1.21112	0.22585	0.535503	117.726	112.418	105.82	92.9022	105.702	92.5618	Zswim4	ENSMUSG00000035671	zinc finger SWIM-type containing 4 [Source:MGI Symbol;Acc:MGI:2443726]
ENSMUST00000068700	151.222	-0.187683	0.155049	-1.21048	0.226096	0.535503	150.977	154.122	119.159	147.405	177.718	157.949	Wdr6	ENSMUSG00000066357	WD repeat domain 6 [Source:MGI Symbol;Acc:MGI:1930140]
ENSMUST00000148082	297.613	0.141527	0.116866	1.21102	0.225888	0.535503	331.61	307.337	296.119	310.913	276.451	263.249	Gm16599	ENSMUSG00000086220	predicted gene, 16599 [Source:MGI Symbol;Acc:MGI:4439523]
ENSMUST00000070524	79.6762	0.262024	0.217223	1.20625	0.227722	0.536079	70.995	82.5005	108.488	55.7413	72.0166	88.3158	Tgoln1	ENSMUSG00000056429	trans-golgi network protein [Source:MGI Symbol;Acc:MGI:105080]
ENSMUST00000097830	129.615	0.199522	0.165323	1.20686	0.227485	0.536079	138.395	118.764	159.175	121.392	109.187	130.775	Otud3	ENSMUSG00000041161	OTU domain containing 3 [Source:MGI Symbol;Acc:MGI:1920412]
ENSMUST00000108353	96.1852	0.224031	0.185472	1.20789	0.227088	0.536079	115.929	98.8193	96.9279	92.9022	73.1782	99.3553	Hipk4	ENSMUSG00000040424	homeodomain interacting protein kinase 4 [Source:MGI Symbol;Acc:MGI:2685008]
ENSMUST00000165561	72.2106	-0.271399	0.224681	-1.20793	0.227074	0.536079	62.907	62.5553	72.029	79.2765	54.5933	101.903	Smim13	ENSMUSG00000091264	small integral membrane protein 13 [Source:MGI Symbol;Acc:MGI:2652854]
ENSMUST00000194507	71.0396	-0.275314	0.228257	-1.20616	0.227757	0.536079	70.995	65.2751	55.1333	95.3795	85.9553	53.499	Gm38325	ENSMUSG00000103583	predicted gene, 38325 [Source:MGI Symbol;Acc:MGI:5611553]
ENSMUST00000219228	164.037	0.191838	0.158839	1.20775	0.227142	0.536079	168.95	196.732	160.064	168.463	118.479	171.537	Fgf22	ENSMUSG00000020327	fibroblast growth factor 22 [Source:MGI Symbol;Acc:MGI:1914362]
ENSMUST00000028600	70.1115	0.263797	0.219273	1.20305	0.228955	0.53779	90.7657	57.1157	81.8107	58.2187	67.3704	65.3877	Hipk3	ENSMUSG00000027177	homeodomain interacting protein kinase 3 [Source:MGI Symbol;Acc:MGI:1314882]
ENSMUST00000208632	295.638	-0.141293	0.117446	-1.20305	0.228958	0.53779	286.676	274.699	280.113	336.925	319.429	275.987	Gm45236	ENSMUSG00000109357	predicted gene 45236 [Source:MGI Symbol;Acc:MGI:5753812]
ENSMUST00000110155	72.4657	0.257145	0.214191	1.20054	0.229929	0.539147	94.3604	62.5553	79.143	73.083	66.2088	59.4433	Tatdn1	ENSMUSG00000050891	TatD DNase domain containing 1 [Source:MGI Symbol;Acc:MGI:1916944]
ENSMUST00000130676	105.395	-0.20511	0.170878	-1.20033	0.230011	0.539147	104.246	96.0995	93.3709	107.767	119.641	111.244	Snapc3	ENSMUSG00000028483	small nuclear RNA activating complex, polypeptide 3 [Source:MGI Symbol;Acc:MGI:1916338]
ENSMUST00000084621	119.175	0.208631	0.174247	1.19733	0.231178	0.539963	149.179	126.017	109.377	104.05	99.894	126.529	Tbc1d2	ENSMUSG00000039813	TBC1 domain family, member 2 [Source:MGI Symbol;Acc:MGI:2652885]
ENSMUST00000120260	108.208	0.212008	0.177118	1.19699	0.231311	0.539963	102.448	134.177	111.156	99.0956	111.51	90.8634	Gm15784	ENSMUSG00000081126	predicted gene 15784 [Source:MGI Symbol;Acc:MGI:3783226]
ENSMUST00000143073	4819.05	-0.122284	0.102104	-1.19765	0.231054	0.539963	4673.09	5313.58	3856.66	5122.01	5323.42	4625.54	Ccdc107	ENSMUSG00000028461	coiled-coil domain containing 107 [Source:MGI Symbol;Acc:MGI:1913423]
ENSMUST00000206202	276.015	-0.156371	0.130455	-1.19866	0.230661	0.539963	266.007	278.326	236.54	324.538	307.813	242.869	Gm44985	ENSMUSG00000108688	predicted gene 44985 [Source:MGI Symbol;Acc:MGI:5753561]
ENSMUST00000036206	347.273	0.130914	0.109481	1.19577	0.231788	0.540521	369.354	387.118	333.468	324.538	325.236	343.922	Ccdc92	ENSMUSG00000037979	coiled-coil domain containing 92 [Source:MGI Symbol;Acc:MGI:106485]
ENSMUST00000195880	95.8844	-0.231481	0.193931	-1.19363	0.232624	0.541913	81.779	106.072	77.3645	81.7539	119.641	108.696	Gm37755	ENSMUSG00000103382	predicted gene, 37755 [Source:MGI Symbol;Acc:MGI:5610983]
ENSMUST00000024783	514.9	0.111773	0.0938498	1.19098	0.233661	0.54377	521.229	543.053	539.773	480.614	521.54	483.189	Bysl	ENSMUSG00000023988	bystin-like [Source:MGI Symbol;Acc:MGI:1858419]
ENSMUST00000022433	275.249	0.160325	0.135134	1.18641	0.235459	0.545315	294.764	254.754	324.575	230.397	240.443	306.558	Dnah12	ENSMUSG00000021879	dynein, axonemal, heavy chain 12 [Source:MGI Symbol;Acc:MGI:107720]
ENSMUST00000052776	193.108	-0.169962	0.143318	-1.18591	0.23566	0.545315	201.302	170.441	173.403	178.372	238.12	197.012	Hist1h2ba	ENSMUSG00000050799	histone cluster 1, H2ba [Source:MGI Symbol;Acc:MGI:2448375]
ENSMUST00000119981	76.6707	-0.256463	0.215846	-1.18818	0.234764	0.545315	81.779	78.8741	48.9086	92.9022	74.3398	83.2207	Pcnp	ENSMUSG00000071533	PEST proteolytic signal containing nuclear protein [Source:MGI Symbol;Acc:MGI:1923552]
ENSMUST00000125302	83.158	-0.223798	0.188743	-1.18573	0.23573	0.545315	78.1844	75.2477	76.4752	89.1861	94.0863	85.7683	Mdh1	ENSMUSG00000020321	malate dehydrogenase 1, NAD (soluble) [Source:MGI Symbol;Acc:MGI:97051]
ENSMUST00000181692	65.565	-0.256349	0.216193	-1.18574	0.235725	0.545315	50.3256	64.3685	64.0258	79.2765	70.8551	64.5385	Gm26788	ENSMUSG00000096992	predicted gene, 26788 [Source:MGI Symbol;Acc:MGI:5477282]
ENSMUST00000212699	189.497	-0.172012	0.14508	-1.18564	0.235766	0.545315	147.382	208.518	178.739	195.714	207.919	198.711	Gm17435	ENSMUSG00000097000	predicted gene, 17435 [Source:MGI Symbol;Acc:MGI:4937069]
ENSMUST00000025228	133.038	-0.207079	0.175399	-1.18061	0.237757	0.548276	100.651	141.429	128.941	112.721	168.426	146.061	Cdc23	ENSMUSG00000024370	CDC23 cell division cycle 23 [Source:MGI Symbol;Acc:MGI:1098815]
ENSMUST00000195714	80.3998	0.243595	0.206329	1.18061	0.237757	0.548276	89.8671	67.0883	104.931	71.8443	69.6935	78.9747	Gm37305	ENSMUSG00000103041	predicted gene, 37305 [Source:MGI Symbol;Acc:MGI:5610533]
ENSMUST00000235544	100.935	0.217609	0.184324	1.18058	0.237772	0.548276	98.8538	116.951	109.377	80.5152	114.994	84.9191	Gm50232	ENSMUSG00000117743	predicted gene, 50232 [Source:MGI Symbol;Acc:MGI:6303036]
ENSMUST00000073316	164.401	0.186264	0.157952	1.17925	0.2383	0.548413	206.694	141.429	177.849	142.45	149.841	168.14	Foxm1	ENSMUSG00000001517	forkhead box M1 [Source:MGI Symbol;Acc:MGI:1347487]
ENSMUST00000167797	242.477	-0.149193	0.12652	-1.17921	0.238314	0.548413	211.188	257.474	220.533	257.649	265.997	242.019	Phykpl	ENSMUSG00000020359	5-phosphohydroxy-L-lysine phospholyase [Source:MGI Symbol;Acc:MGI:1920197]
ENSMUST00000035300	134.696	0.187327	0.158956	1.17848	0.238605	0.548525	143.787	144.149	142.279	109.005	147.518	121.434	Scgb1c1	ENSMUSG00000038801	secretoglobin, family 1C, member 1 [Source:MGI Symbol;Acc:MGI:2655401]
ENSMUST00000090461	64.7921	-0.256114	0.217608	-1.17695	0.239216	0.549373	54.8189	54.3959	68.472	69.3669	62.7242	78.9747	Fyb	ENSMUSG00000022148	FYN binding protein [Source:MGI Symbol;Acc:MGI:1346327]
ENSMUST00000027768	154.662	0.185233	0.157682	1.17472	0.240106	0.549646	195.012	135.083	163.621	141.211	148.68	144.362	Ahctf1	ENSMUSG00000026491	AT hook containing transcription factor 1 [Source:MGI Symbol;Acc:MGI:1915033]
ENSMUST00000040182	77.1083	0.249153	0.212246	1.17389	0.24044	0.549646	92.5631	78.8741	80.9215	48.3091	81.3091	80.6731	Ccdc88a	ENSMUSG00000032740	coiled coil domain containing 88A [Source:MGI Symbol;Acc:MGI:1925177]
ENSMUST00000123473	577.524	-0.128532	0.109672	-1.17197	0.241211	0.549646	466.41	608.328	578.9	629.257	635.373	546.879	St8sia3os	ENSMUSG00000086128	ST8 alpha-N-acetyl-neuraminide alpha-2,8-sialyltransferase 3, opposite strand [Source:MGI Symbol;Acc:MGI:1920838]
ENSMUST00000123613	62.032	0.271114	0.231212	1.17258	0.240965	0.549646	67.4003	74.3411	60.4688	70.6056	56.9164	42.4595	Chn1os1	ENSMUSG00000085838	chimerin 1, opposite strand 1 [Source:MGI Symbol;Acc:MGI:3702041]
ENSMUST00000141023	122.255	-0.188748	0.160526	-1.17581	0.239672	0.549646	108.739	121.484	112.934	132.54	121.964	135.871	Gm13609	ENSMUSG00000086192	predicted gene 13609 [Source:MGI Symbol;Acc:MGI:3651299]
ENSMUST00000146903	79.0752	0.244911	0.208789	1.17301	0.240794	0.549646	98.8538	86.1269	71.1397	79.2765	81.3091	57.745	Sympk	ENSMUSG00000023118	symplekin [Source:MGI Symbol;Acc:MGI:1915438]
ENSMUST00000187929	65.8021	0.261273	0.222965	1.17181	0.241273	0.549646	62.0083	67.9949	85.3677	68.1282	47.6239	63.6893	Gm28940	ENSMUSG00000100786	predicted gene 28940 [Source:MGI Symbol;Acc:MGI:5579646]
ENSMUST00000208833	227.12	0.16579	0.141206	1.1741	0.240355	0.549646	279.487	194.919	246.321	221.726	198.627	221.639	Gm35339	ENSMUSG00000109179	predicted gene, 35339 [Source:MGI Symbol;Acc:MGI:5594498]
ENSMUST00000043962	105.374	-0.206489	0.176383	-1.17069	0.241725	0.549848	96.1578	111.512	85.3677	123.87	109.187	106.149	Cdc16	ENSMUSG00000038416	CDC16 cell division cycle 16 [Source:MGI Symbol;Acc:MGI:1917207]
ENSMUST00000107979	112.07	0.194626	0.166292	1.17039	0.241846	0.549848	124.915	116.951	116.491	109.005	105.702	99.3553	Fam205a1	ENSMUSG00000078721	family with sequence similarity 205, member A1 [Source:MGI Symbol;Acc:MGI:3651059]
ENSMUST00000003310	311.555	0.148324	0.127586	1.16254	0.245016	0.550436	284.879	328.189	371.705	265.081	285.743	333.732	Ranbp2	ENSMUSG00000003226	RAN binding protein 2 [Source:MGI Symbol;Acc:MGI:894323]
ENSMUST00000022574	204.52	0.164534	0.140991	1.16698	0.243218	0.550436	212.985	205.798	232.093	165.985	183.526	226.734	Lrrc63	ENSMUSG00000021997	leucine rich repeat containing 63 [Source:MGI Symbol;Acc:MGI:1918109]
ENSMUST00000032196	82.267	0.228101	0.195722	1.16543	0.243843	0.550436	84.4751	87.9401	94.2602	82.9926	61.5626	82.3715	Arl8b	ENSMUSG00000030105	ADP-ribosylation factor-like 8B [Source:MGI Symbol;Acc:MGI:1914416]
ENSMUST00000052965	733.536	0.117765	0.101278	1.16279	0.244914	0.550436	767.465	691.735	834.113	632.973	691.127	783.803	Nipbl	ENSMUSG00000022141	NIPBL cohesin loading factor [Source:MGI Symbol;Acc:MGI:1913976]
ENSMUST00000107938	128.606	-0.202428	0.173665	-1.16562	0.243768	0.550436	108.739	118.764	131.609	106.528	168.426	137.569	Shank1	ENSMUSG00000038738	SH3 and multiple ankyrin repeat domains 1 [Source:MGI Symbol;Acc:MGI:3613677]
ENSMUST00000108385	244.821	0.158993	0.136564	1.16424	0.244326	0.550436	265.108	297.364	211.641	242.784	234.635	217.393	Cyp2t4	ENSMUSG00000078787	cytochrome P450, family 2, subfamily t, polypeptide 4 [Source:MGI Symbol;Acc:MGI:2686296]
ENSMUST00000165493	136.762	0.185218	0.158672	1.1673	0.243091	0.550436	138.395	130.55	167.178	135.018	125.448	123.982	Nsun4	ENSMUSG00000028706	NOL1/NOP2/Sun domain family, member 4 [Source:MGI Symbol;Acc:MGI:1919431]
ENSMUST00000173706	79.1804	-0.238682	0.205301	-1.1626	0.244993	0.550436	71.8937	70.7147	74.6967	75.5604	109.187	73.0304	Gm20493	ENSMUSG00000092246	predicted gene 20493 [Source:MGI Symbol;Acc:MGI:5141958]
ENSMUST00000205812	88.1333	0.217002	0.186431	1.16398	0.24443	0.550436	92.5631	100.632	90.7032	90.4248	75.5013	78.9747	Gm44878	ENSMUSG00000108477	predicted gene 44878 [Source:MGI Symbol;Acc:MGI:5753454]
ENSMUST00000206975	121.247	0.202385	0.173736	1.1649	0.24406	0.550436	147.382	112.418	128.052	116.437	128.933	94.2602	Gm44771	ENSMUSG00000108466	predicted gene 44771 [Source:MGI Symbol;Acc:MGI:5753347]
ENSMUST00000218379	161.191	-0.169227	0.145262	-1.16498	0.244029	0.550436	141.091	152.309	160.954	187.043	166.103	159.648	Gm48768	ENSMUSG00000112346	predicted gene, 48768 [Source:MGI Symbol;Acc:MGI:6098457]
ENSMUST00000225363	148.38	-0.175793	0.150501	-1.16805	0.242785	0.550436	123.118	145.056	149.393	164.746	156.81	151.156	Gm30054	ENSMUSG00000114937	predicted gene, 30054 [Source:MGI Symbol;Acc:MGI:5589213]
ENSMUST00000011450	76.9557	-0.238004	0.204958	-1.16123	0.245548	0.550541	82.6777	73.4345	56.0225	85.47	76.6629	87.4666	Sugp1	ENSMUSG00000011306	SURP and G patch domain containing 1 [Source:MGI Symbol;Acc:MGI:1917866]
ENSMUST00000210861	174.676	-0.181265	0.156044	-1.16163	0.245387	0.550541	141.99	161.375	189.41	175.895	160.295	219.091	Slc6a21	ENSMUSG00000070568	solute carrier family 6 member 21 [Source:MGI Symbol;Acc:MGI:1923963]
ENSMUST00000137079	86.4452	-0.227482	0.196095	-1.16006	0.246025	0.551067	75.4883	73.4345	88.9247	112.721	88.2785	79.8239	Ccdc167	ENSMUSG00000024018	coiled-coil domain containing 167 [Source:MGI Symbol;Acc:MGI:1915847]
ENSMUST00000030471	163.893	0.173922	0.150859	1.15288	0.248961	0.555887	179.734	172.254	170.735	158.553	125.448	176.632	Lrrc41	ENSMUSG00000028703	leucine rich repeat containing 41 [Source:MGI Symbol;Acc:MGI:2441984]
ENSMUST00000143764	1237.76	0.219628	0.19033	1.15393	0.248529	0.555887	1235.67	1141.41	1619.32	1070.23	1045.4	1314.55	Fsip2	ENSMUSG00000075249	fibrous sheath-interacting protein 2 [Source:MGI Symbol;Acc:MGI:2664111]
ENSMUST00000173683	116.276	-0.214417	0.186061	-1.1524	0.249157	0.555887	106.942	126.017	88.9247	121.392	153.326	101.054	Gm20529	ENSMUSG00000092218	predicted gene 20529 [Source:MGI Symbol;Acc:MGI:5141994]
ENSMUST00000205573	110.727	-0.200674	0.174087	-1.15272	0.249025	0.555887	103.347	113.325	91.5924	118.915	133.579	103.601	Xrcc1	ENSMUSG00000051768	X-ray repair complementing defective repair in Chinese hamster cells 1 [Source:MGI Symbol;Acc:MGI:99137]
ENSMUST00000128415	167.302	-0.166812	0.144876	-1.15141	0.249564	0.556247	159.065	164.094	148.504	199.43	173.072	159.648	Gm15619	ENSMUSG00000085430	predicted gene 15619 [Source:MGI Symbol;Acc:MGI:3783064]
ENSMUST00000181275	129.849	0.184062	0.159981	1.15052	0.249928	0.556512	146.483	131.457	135.166	135.018	123.125	107.847	Gm16982	ENSMUSG00000097170	predicted gene, 16982 [Source:MGI Symbol;Acc:MGI:4439906]
ENSMUST00000036884	101.147	0.214669	0.186775	1.14935	0.250413	0.556663	124.915	87.9401	112.045	104.05	96.4094	81.5223	Klf9	ENSMUSG00000033863	Kruppel-like factor 9 [Source:MGI Symbol;Acc:MGI:1333856]
ENSMUST00000173672	84.4813	0.235188	0.204659	1.14917	0.250486	0.556663	85.3737	87.9401	102.263	55.7413	81.3091	94.2602	Neat1	ENSMUSG00000092274	nuclear paraspeckle assembly transcript 1 (non-protein coding) [Source:MGI Symbol;Acc:MGI:1914211]
ENSMUST00000186833	66.9145	0.250975	0.218837	1.14686	0.251441	0.558018	79.9817	77.9675	59.5795	71.8443	56.9164	55.1974	Aamp	ENSMUSG00000006299	angio-associated migratory protein [Source:MGI Symbol;Acc:MGI:107809]
ENSMUST00000194483	73.291	-0.235545	0.205447	-1.1465	0.251588	0.558018	55.7176	72.5279	73.8075	82.9926	73.1782	81.5223	Gm37534	ENSMUSG00000103427	predicted gene, 37534 [Source:MGI Symbol;Acc:MGI:5610762]
ENSMUST00000133963	835.212	0.105993	0.0925378	1.1454	0.252044	0.5582	862.724	950.115	785.205	759.32	851.423	802.485	Gm15491	ENSMUSG00000087367	predicted gene 15491 [Source:MGI Symbol;Acc:MGI:3782937]
ENSMUST00000194543	228.593	0.150139	0.131113	1.14511	0.252162	0.5582	253.425	229.369	240.097	220.488	187.011	241.17	Mia3	ENSMUSG00000056050	melanoma inhibitory activity 3 [Source:MGI Symbol;Acc:MGI:2443183]
ENSMUST00000194426	147.448	-0.177197	0.154849	-1.14432	0.252489	0.55838	134.801	155.935	123.605	159.792	169.588	140.966	D430040D24Rik	ENSMUSG00000087589	RIKEN cDNA D430040D24 gene [Source:MGI Symbol;Acc:MGI:2442526]
ENSMUST00000050519	113.471	0.196526	0.172092	1.14198	0.253461	0.558995	104.246	140.523	119.159	102.812	104.54	109.546	Elfn1	ENSMUSG00000048988	leucine rich repeat and fibronectin type III, extracellular 1 [Source:MGI Symbol;Acc:MGI:2442479]
ENSMUST00000129585	217.851	0.152694	0.13359	1.14301	0.253036	0.558995	236.35	251.128	200.97	190.759	220.696	207.203	Ddx5	ENSMUSG00000020719	DEAD (Asp-Glu-Ala-Asp) box polypeptide 5 [Source:MGI Symbol;Acc:MGI:105037]
ENSMUST00000155372	1135.19	0.0942973	0.0825819	1.14186	0.25351	0.558995	1220.39	1194.9	1099.11	1159.42	1108.13	1029.22	Kbtbd4	ENSMUSG00000005505	kelch repeat and BTB (POZ) domain containing 4 [Source:MGI Symbol;Acc:MGI:1914386]
ENSMUST00000213154	81.1568	0.224221	0.196464	1.14128	0.253753	0.558995	85.3737	82.5005	95.1494	61.9348	81.3091	80.6731	Cep164	ENSMUSG00000043987	centrosomal protein 164 [Source:MGI Symbol;Acc:MGI:2384878]
ENSMUST00000126664	86.3329	0.227394	0.199507	1.13978	0.254379	0.559831	100.651	87.0335	93.3709	69.3669	67.3704	100.204	Atp10d	ENSMUSG00000046808	ATPase, class V, type 10D [Source:MGI Symbol;Acc:MGI:2450125]
ENSMUST00000006749	91.7648	0.213778	0.187854	1.138	0.25512	0.560375	84.4751	101.539	109.377	79.2765	95.2478	80.6731	Slc4a1	ENSMUSG00000006574	solute carrier family 4 (anion exchanger), member 1 [Source:MGI Symbol;Acc:MGI:109393]
ENSMUST00000126965	78.6703	0.220864	0.193995	1.1385	0.25491	0.560375	86.2724	81.5939	86.2569	69.3669	75.5013	73.0304	Grip1os1	ENSMUSG00000085418	glutamate receptor interacting protein 1, opposite strand 1 [Source:MGI Symbol;Acc:MGI:1922226]
ENSMUST00000152930	83.9387	-0.360513	0.317081	-1.13697	0.255549	0.560774	52.1229	69.8081	98.7064	106.528	72.0166	104.45	Ccdc34	ENSMUSG00000027160	coiled-coil domain containing 34 [Source:MGI Symbol;Acc:MGI:1915451]
ENSMUST00000228462	113.302	-0.207307	0.182457	-1.1362	0.255874	0.560945	114.131	116.045	85.3677	101.573	146.356	116.339	Khnyn	ENSMUSG00000047153	KH and NYN domain containing [Source:MGI Symbol;Acc:MGI:2451333]
ENSMUST00000057653	78.5981	-0.240268	0.211713	-1.13488	0.256427	0.561615	74.5897	85.2203	56.0225	76.7991	103.379	75.578	Car5a	ENSMUSG00000025317	carbonic anhydrase 5a, mitochondrial [Source:MGI Symbol;Acc:MGI:101946]
ENSMUST00000059026	1341.14	0.0882355	0.0781124	1.1296	0.258647	0.56593	1324.64	1472.32	1348.1	1351.42	1289.33	1261.05	Abi3	ENSMUSG00000018381	ABI gene family, member 3 [Source:MGI Symbol;Acc:MGI:1913860]
ENSMUST00000021314	87.4108	0.216397	0.192706	1.12294	0.261462	0.570264	93.4618	100.632	87.1462	74.3217	97.5709	71.332	Nmt1	ENSMUSG00000020936	N-myristoyltransferase 1 [Source:MGI Symbol;Acc:MGI:102579]
ENSMUST00000039949	108.61	-0.200799	0.17887	-1.1226	0.261608	0.570264	106.043	108.792	87.1462	135.018	116.156	98.5061	Eme1	ENSMUSG00000039055	essential meiotic structure-specific endonuclease 1 [Source:MGI Symbol;Acc:MGI:3576783]
ENSMUST00000120025	85.8303	-0.212371	0.189355	-1.12155	0.262055	0.570264	75.4883	79.7807	82.6999	105.289	85.9553	85.7683	Kpna2-ps	ENSMUSG00000083672	Kpna2 retrotransposed pseudogene [Source:MGI Symbol;Acc:MGI:3647335]
ENSMUST00000135333	135.752	-0.171815	0.153174	-1.1217	0.26199	0.570264	125.814	135.083	121.827	151.121	140.549	140.116	Abhd2	ENSMUSG00000039202	abhydrolase domain containing 2 [Source:MGI Symbol;Acc:MGI:1914344]
ENSMUST00000195512	1937.69	0.0909484	0.0811056	1.12136	0.262135	0.570264	1969.89	2184	1840.74	1949.71	1884.05	1797.74	Gm37206	ENSMUSG00000103651	predicted gene, 37206 [Source:MGI Symbol;Acc:MGI:5610434]
ENSMUST00000221921	68.5326	-0.238365	0.212409	-1.1222	0.261778	0.570264	56.6163	65.2751	66.6935	85.47	61.5626	75.578	Gm19144	ENSMUSG00000113898	predicted gene, 19144 [Source:MGI Symbol;Acc:MGI:5011329]
ENSMUST00000041852	214.829	-0.149703	0.133687	-1.1198	0.262798	0.57061	183.329	227.556	200.081	211.817	246.25	219.94	Pyroxd1	ENSMUSG00000041671	pyridine nucleotide-disulphide oxidoreductase domain 1 [Source:MGI Symbol;Acc:MGI:2676395]
ENSMUST00000079125	331.065	0.133308	0.119022	1.12002	0.262703	0.57061	350.482	384.398	305.901	303.48	297.359	344.771	Scand1	ENSMUSG00000046229	SCAN domain-containing 1 [Source:MGI Symbol;Acc:MGI:1343132]
ENSMUST00000043484	150.158	0.170455	0.152725	1.11609	0.264384	0.572412	176.139	136.896	164.511	136.256	139.387	147.759	Reep2	ENSMUSG00000038555	receptor accessory protein 2 [Source:MGI Symbol;Acc:MGI:2385070]
ENSMUST00000124311	66.3767	-0.2614	0.234185	-1.11621	0.264333	0.572412	63.8056	64.3685	51.5763	87.9474	81.3091	49.2531	Erg28	ENSMUSG00000021252	ergosterol biosynthesis 28 [Source:MGI Symbol;Acc:MGI:1915571]
ENSMUST00000203256	62.2917	0.251323	0.225177	1.11611	0.264373	0.572412	59.3123	62.5553	80.9215	53.2639	65.0473	52.6498	Olfr315	ENSMUSG00000056959	olfactory receptor 315 [Source:MGI Symbol;Acc:MGI:3030149]
ENSMUST00000231712	111.089	-0.204169	0.183191	-1.11451	0.265059	0.573327	82.6777	120.578	107.599	112.721	104.54	138.418	Ppil2	ENSMUSG00000022771	peptidylprolyl isomerase (cyclophilin)-like 2 [Source:MGI Symbol;Acc:MGI:2447857]
ENSMUST00000036734	152.394	0.174926	0.157434	1.11111	0.266521	0.574945	138.395	163.188	182.296	164.746	132.418	133.323	Gadd45gip1	ENSMUSG00000033751	growth arrest and DNA-damage-inducible, gamma interacting protein 1 [Source:MGI Symbol;Acc:MGI:1914947]
ENSMUST00000117551	137.553	0.176055	0.158465	1.111	0.266568	0.574945	141.091	140.523	156.507	142.45	108.025	136.72	Rasa3	ENSMUSG00000031453	RAS p21 protein activator 3 [Source:MGI Symbol;Acc:MGI:1197013]
ENSMUST00000123390	106.406	0.205471	0.18489	1.11131	0.266435	0.574945	122.219	114.231	104.042	97.8569	121.964	78.1255	Gm15873	ENSMUSG00000085725	predicted gene 15873 [Source:MGI Symbol;Acc:MGI:3802055]
ENSMUST00000145865	103.622	0.199324	0.179646	1.10954	0.267199	0.575434	121.321	116.045	96.0386	91.6635	87.1169	109.546	4930442L01Rik	ENSMUSG00000087223	RIKEN cDNA 4930442L01 gene [Source:MGI Symbol;Acc:MGI:1914833]
ENSMUST00000167250	175.185	-0.159083	0.143409	-1.1093	0.267302	0.575434	165.355	148.682	181.406	193.236	195.142	167.291	Plppr3	ENSMUSG00000035835	phospholipid phosphatase related 3 [Source:MGI Symbol;Acc:MGI:2388640]
ENSMUST00000037418	68.8377	-0.244354	0.220562	-1.10787	0.267919	0.576169	50.3256	65.2751	72.9182	69.3669	90.6016	64.5385	Tmed8	ENSMUSG00000034111	transmembrane p24 trafficking protein 8 [Source:MGI Symbol;Acc:MGI:1923480]
ENSMUST00000052708	107.125	0.190868	0.172425	1.10696	0.268309	0.576169	114.131	107.885	120.938	106.528	87.1169	106.149	Ckap2l	ENSMUSG00000048327	cytoskeleton associated protein 2-like [Source:MGI Symbol;Acc:MGI:1917716]
ENSMUST00000180496	75.9317	0.233505	0.210983	1.10674	0.268405	0.576169	74.5897	76.1543	95.1494	85.47	54.5933	69.6336	Gm26568	ENSMUSG00000097315	predicted gene, 26568 [Source:MGI Symbol;Acc:MGI:5477062]
ENSMUST00000042172	67.3755	-0.249944	0.22632	-1.10438	0.269428	0.576539	71.8937	41.7035	71.1397	73.083	70.8551	75.578	Tmem247	ENSMUSG00000037689	transmembrane protein 247 [Source:MGI Symbol;Acc:MGI:1925719]
ENSMUST00000079368	287.665	0.127277	0.115409	1.10283	0.270102	0.576539	304.649	293.738	301.455	299.764	264.835	261.551	Adam1b	ENSMUSG00000062438	a disintegrin and metallopeptidase domain 1b [Source:MGI Symbol;Acc:MGI:2429506]
ENSMUST00000080036	123.941	-0.181824	0.164743	-1.10369	0.269729	0.576539	115.03	103.352	130.719	117.676	135.902	140.966	Htt	ENSMUSG00000029104	huntingtin [Source:MGI Symbol;Acc:MGI:96067]
ENSMUST00000129670	92.7765	-0.206039	0.186798	-1.103	0.270026	0.576539	79.9817	88.8467	88.9247	118.915	88.2785	91.7126	Vwc2	ENSMUSG00000050830	von Willebrand factor C domain containing 2 [Source:MGI Symbol;Acc:MGI:2442987]
ENSMUST00000148699	176.269	0.162978	0.147707	1.10339	0.269859	0.576539	205.796	187.666	163.621	179.611	176.557	144.362	Gm15567	ENSMUSG00000084974	predicted gene 15567 [Source:MGI Symbol;Acc:MGI:3783016]
ENSMUST00000170026	148.298	-0.182115	0.165041	-1.10345	0.269832	0.576539	117.726	163.188	136.944	163.508	130.095	178.33	Gm17028	ENSMUSG00000090638	predicted gene 17028 [Source:MGI Symbol;Acc:MGI:4937855]
ENSMUST00000111466	324.583	0.143102	0.129941	1.10129	0.270772	0.577426	404.402	307.337	312.126	271.274	310.136	342.224	C1qtnf4	ENSMUSG00000040794	C1q and tumor necrosis factor related protein 4 [Source:MGI Symbol;Acc:MGI:1914695]
ENSMUST00000117263	99.5428	-0.195849	0.178028	-1.1001	0.271289	0.577444	83.5764	106.072	88.9247	102.812	108.025	107.847	Rad9b	ENSMUSG00000038569	RAD9 checkpoint clamp component B [Source:MGI Symbol;Acc:MGI:2385231]
ENSMUST00000224942	402.84	0.118573	0.107734	1.10061	0.271065	0.577444	388.226	464.179	404.607	397.621	397.253	365.152	Gm48441	ENSMUSG00000114929	predicted gene, 48441 [Source:MGI Symbol;Acc:MGI:6097949]
ENSMUST00000120868	87.781	0.216843	0.197377	1.09862	0.271932	0.577728	75.4883	115.138	92.4817	84.2313	77.8244	81.5223	Gm14489	ENSMUSG00000082786	predicted gene 14489 [Source:MGI Symbol;Acc:MGI:3649726]
ENSMUST00000223791	338.469	-0.129812	0.118146	-1.09874	0.271879	0.577728	353.178	320.029	298.787	314.629	348.468	395.723	Gm48342	ENSMUSG00000114934	predicted gene, 48342 [Source:MGI Symbol;Acc:MGI:6097804]
ENSMUST00000020754	72.1366	0.222925	0.203132	1.09744	0.272449	0.578286	78.1844	73.4345	80.9215	70.6056	68.532	61.1417	Cfap36	ENSMUSG00000020462	cilia and flagella associated protein 36 [Source:MGI Symbol;Acc:MGI:1913994]
ENSMUST00000122090	127.496	-0.194821	0.177672	-1.09652	0.27285	0.578596	134.801	121.484	100.485	109.005	168.426	130.775	Gm13169	ENSMUSG00000084127	predicted gene 13169 [Source:MGI Symbol;Acc:MGI:3651793]
ENSMUST00000148641	107.311	0.189422	0.172855	1.09584	0.273148	0.578687	120.422	117.858	104.042	100.334	110.348	90.8634	Gm15927	ENSMUSG00000085039	predicted gene 15927 [Source:MGI Symbol;Acc:MGI:3801889]
ENSMUST00000219743	77.2558	0.219805	0.200777	1.09477	0.273617	0.57914	79.083	77.0609	92.4817	73.083	78.986	62.8401	Gm47574	ENSMUSG00000112396	predicted gene, 47574 [Source:MGI Symbol;Acc:MGI:6096606]
ENSMUST00000009774	146.828	0.299451	0.273928	1.09318	0.274316	0.579326	168.051	122.391	196.524	110.244	117.317	166.441	Ppp2cb	ENSMUSG00000009630	protein phosphatase 2 (formerly 2A), catalytic subunit, beta isoform [Source:MGI Symbol;Acc:MGI:1321161]
ENSMUST00000098916	94.8257	-0.203267	0.185944	-1.09316	0.274322	0.579326	86.2724	104.259	73.8075	106.528	98.7325	99.3553	Gm10699	ENSMUSG00000074461	predicted gene 10699 [Source:MGI Symbol;Acc:MGI:3642530]
ENSMUST00000163781	162.384	-0.161331	0.147704	-1.09225	0.274721	0.579326	164.457	142.336	152.061	170.94	191.657	152.854	9330020H09Rik	ENSMUSG00000091050	RIKEN cDNA 9330020H09 gene [Source:MGI Symbol;Acc:MGI:3704457]
ENSMUST00000178604	92.8731	0.201404	0.184396	1.09224	0.274727	0.579326	99.7525	108.792	88.9247	86.7087	94.0863	78.9747	Gm5472	ENSMUSG00000096157	predicted gene 5472 [Source:MGI Symbol;Acc:MGI:3648309]
ENSMUST00000075317	68.4185	0.229762	0.210646	1.09075	0.275382	0.58017	63.8056	80.6873	77.3645	58.2187	65.0473	65.3877	Pdzd2	ENSMUSG00000022197	PDZ domain containing 2 [Source:MGI Symbol;Acc:MGI:1922394]
ENSMUST00000202688	120.445	0.191413	0.175702	1.08942	0.275967	0.580862	149.179	123.297	112.045	104.05	134.741	99.3553	Gm36840	ENSMUSG00000107078	predicted gene, 36840 [Source:MGI Symbol;Acc:MGI:5595999]
ENSMUST00000134586	265.081	0.152738	0.140352	1.08825	0.276483	0.581408	292.068	327.282	217.865	241.546	267.159	244.567	Kcnmb4os1	ENSMUSG00000020164	potassium large conductance calcium-activated channel, subfamily M, beta member 4, opposite strand 1 [Source:MGI Symbol;Acc:MGI:1914592]
ENSMUST00000023225	81.376	-0.220158	0.202516	-1.08711	0.276986	0.581927	63.8056	84.3137	76.4752	90.4248	101.056	72.1812	Grina	ENSMUSG00000022564	glutamate receptor, ionotropic, N-methyl D-aspartate-associated protein 1 (glutamate binding) [Source:MGI Symbol;Acc:MGI:1913418]
ENSMUST00000140920	84.6794	0.220555	0.203007	1.08645	0.277282	0.58201	111.435	77.0609	85.3677	64.4122	88.2785	81.5223	Urb1	ENSMUSG00000039929	URB1 ribosome biogenesis 1 homolog (S. cerevisiae) [Source:MGI Symbol;Acc:MGI:2146468]
ENSMUST00000016670	275.918	0.149368	0.137704	1.0847	0.278053	0.582901	328.015	228.463	314.793	237.83	272.966	273.439	Dyrk3	ENSMUSG00000016526	dual-specificity tyrosine-(Y)-phosphorylation regulated kinase 3 [Source:MGI Symbol;Acc:MGI:1330300]
ENSMUST00000153051	68.9549	0.256772	0.236803	1.08433	0.27822	0.582901	82.6777	57.1157	85.3677	80.5152	41.8161	66.2369	1700108N11Rik	ENSMUSG00000084837	RIKEN cDNA 1700108N11 gene [Source:MGI Symbol;Acc:MGI:1921551]
ENSMUST00000102713	63.0982	-0.233607	0.215603	-1.0835	0.278585	0.583127	62.0083	56.2091	56.0225	70.6056	61.5626	72.1812	4933409G03Rik	ENSMUSG00000053896	RIKEN cDNA 4933409G03 gene [Source:MGI Symbol;Acc:MGI:3045336]
ENSMUST00000048935	84.0731	0.22746	0.210447	1.08084	0.279767	0.584187	112.334	87.9401	72.029	61.9348	92.9247	77.2764	Dmrt3	ENSMUSG00000042372	doublesex and mab-3 related transcription factor 3 [Source:MGI Symbol;Acc:MGI:2449470]
ENSMUST00000141344	63.6337	0.237358	0.219649	1.08063	0.279864	0.584187	73.691	63.4619	69.3612	49.5478	69.6935	56.0466	D430001F17Rik	ENSMUSG00000087190	RIKEN cDNA D430001F17 gene [Source:MGI Symbol;Acc:MGI:2441973]
ENSMUST00000191492	128.422	-0.188385	0.174301	-1.0808	0.279786	0.584187	149.179	106.072	104.042	154.837	132.418	123.982	4930422M22Rik	ENSMUSG00000100281	RIKEN cDNA 4930422M22 gene [Source:MGI Symbol;Acc:MGI:1921024]
ENSMUST00000142292	64.7687	0.257228	0.238518	1.07844	0.280836	0.584775	67.4003	65.2751	78.2537	82.9926	39.493	55.1974	Junos	ENSMUSG00000087366	jun proto-oncogene, opposite strand [Source:MGI Symbol;Acc:MGI:2652837]
ENSMUST00000186414	66.9679	0.229957	0.213267	1.07826	0.280919	0.584775	70.0963	81.5939	65.8043	54.5026	62.7242	67.0861	Gm6652	ENSMUSG00000099858	predicted gene 6652 [Source:MGI Symbol;Acc:MGI:3647244]
ENSMUST00000206057	334.461	-0.118728	0.110095	-1.07842	0.280848	0.584775	309.143	334.535	318.35	327.016	376.345	341.375	Gm44759	ENSMUSG00000108677	predicted gene 44759 [Source:MGI Symbol;Acc:MGI:5753335]
ENSMUST00000025930	86.403	0.22128	0.205541	1.07657	0.281671	0.585804	103.347	80.6873	96.0386	85.47	56.9164	95.9585	Smc3	ENSMUSG00000024974	structural maintenance of chromosomes 3 [Source:MGI Symbol;Acc:MGI:1339795]
ENSMUST00000024957	71.4654	0.221924	0.207738	1.06829	0.285392	0.585832	79.083	72.5279	80.0322	53.2639	70.8551	73.0304	Pigf	ENSMUSG00000024145	phosphatidylinositol glycan anchor biosynthesis, class F [Source:MGI Symbol;Acc:MGI:99462]
ENSMUST00000028577	129.279	0.174933	0.163777	1.06812	0.285467	0.585832	147.382	116.045	147.615	132.54	111.51	120.585	4930430A15Rik	ENSMUSG00000027157	RIKEN cDNA 4930430A15 gene [Source:MGI Symbol;Acc:MGI:1914825]
ENSMUST00000030145	278.315	0.144511	0.134633	1.07337	0.283105	0.585832	273.196	257.474	347.695	237.83	259.028	294.669	Dcaf12	ENSMUSG00000028436	DDB1 and CUL4 associated factor 12 [Source:MGI Symbol;Acc:MGI:1916220]
ENSMUST00000034560	256.452	-0.150474	0.140462	-1.07128	0.284044	0.585832	259.716	262.914	204.527	305.958	282.259	223.337	Ppp2r1b	ENSMUSG00000032058	protein phosphatase 2, regulatory subunit A, beta [Source:MGI Symbol;Acc:MGI:1920949]
ENSMUST00000043382	282.518	0.143012	0.133443	1.07171	0.283849	0.585832	319.927	265.633	306.79	232.875	249.735	320.145	4930544G11Rik	ENSMUSG00000036463	RIKEN cDNA 4930544G11 gene [Source:MGI Symbol;Acc:MGI:1914903]
ENSMUST00000070435	62.7061	-0.239426	0.223245	-1.07248	0.283504	0.585832	54.8189	65.2751	52.4656	56.98	81.3091	65.3877	Fabp3-ps1	ENSMUSG00000056366	fatty acid binding protein 3, muscle and heart, pseudogene 1 [Source:MGI Symbol;Acc:MGI:101929]
ENSMUST00000111289	352.467	-0.126924	0.118915	-1.06735	0.285816	0.585832	302.852	380.771	326.354	354.267	410.03	340.525	Nit1	ENSMUSG00000013997	nitrilase 1 [Source:MGI Symbol;Acc:MGI:1350916]
ENSMUST00000113296	91.2551	-0.208537	0.194189	-1.07389	0.282873	0.585832	68.299	92.4731	94.2602	85.47	94.0863	112.942	Frs3	ENSMUSG00000023266	fibroblast growth factor receptor substrate 3 [Source:MGI Symbol;Acc:MGI:2135965]
ENSMUST00000127010	134.549	-0.169703	0.158047	-1.07375	0.282933	0.585832	112.334	127.83	139.612	153.598	131.256	142.664	Gm12758	ENSMUSG00000085105	predicted gene 12758 [Source:MGI Symbol;Acc:MGI:3702543]
ENSMUST00000127017	308.864	-0.128158	0.119722	-1.07046	0.284412	0.585832	303.751	303.711	276.556	313.39	367.053	288.725	Gm11192	ENSMUSG00000086586	predicted gene 11192 [Source:MGI Symbol;Acc:MGI:3709388]
ENSMUST00000142617	465.659	-0.130116	0.121596	-1.07007	0.284589	0.585832	368.455	529.454	434.842	516.536	497.147	447.523	Ptprr	ENSMUSG00000020151	protein tyrosine phosphatase, receptor type, R [Source:MGI Symbol;Acc:MGI:109559]
ENSMUST00000170259	225.668	-0.136343	0.127257	-1.0714	0.283992	0.585832	202.201	229.369	212.53	239.068	250.897	219.94	Cyp11b1	ENSMUSG00000075604	cytochrome P450, family 11, subfamily b, polypeptide 1 [Source:MGI Symbol;Acc:MGI:88583]
ENSMUST00000181028	71.0849	-0.231991	0.217107	-1.06856	0.285269	0.585832	66.5016	79.7807	49.7978	85.47	68.532	76.4272	Gm26628	ENSMUSG00000097133	predicted gene, 26628 [Source:MGI Symbol;Acc:MGI:5477122]
ENSMUST00000211736	63.8471	-0.229689	0.214692	-1.06985	0.284686	0.585832	63.8056	54.3959	57.801	74.3217	67.3704	65.3877	Gm6011	ENSMUSG00000110224	predicted gene 6011 [Source:MGI Symbol;Acc:MGI:3644337]
ENSMUST00000221580	127.648	-0.176473	0.165298	-1.06761	0.285699	0.585832	106.942	109.698	143.169	135.018	130.095	140.966	Gm47004	ENSMUSG00000113603	predicted gene, 47004 [Source:MGI Symbol;Acc:MGI:6095681]
ENSMUST00000226445	164.972	-0.166853	0.155836	-1.0707	0.284305	0.585832	140.193	190.386	135.166	183.327	177.718	163.045	AC160336.1	ENSMUSG00000115801	novel transcript
ENSMUST00000040992	139.242	0.171214	0.160772	1.06495	0.2869	0.586993	150.078	141.429	152.061	138.734	104.54	148.608	Nek9	ENSMUSG00000034290	NIMA (never in mitosis gene a)-related expressed kinase 9 [Source:MGI Symbol;Acc:MGI:2387995]
ENSMUST00000094964	364.6	0.245503	0.230525	1.06497	0.286889	0.586993	416.085	324.562	447.291	284.9	292.713	422.048	Dnah7a	ENSMUSG00000096141	dynein, axonemal, heavy chain 7A [Source:MGI Symbol;Acc:MGI:2685838]
ENSMUST00000162998	63.3236	-0.230596	0.217204	-1.06166	0.288391	0.589265	64.7043	58.9289	51.5763	68.1282	62.7242	73.8796	Gm7247	ENSMUSG00000068399	predicted gene 7247 [Source:MGI Symbol;Acc:MGI:3643454]
ENSMUST00000188608	80.8048	-0.209773	0.197647	-1.06135	0.288529	0.589265	83.5764	61.6487	79.143	89.1861	90.6016	80.6731	4930512B01Rik	ENSMUSG00000020992	RIKEN cDNA 4930512B01 gene [Source:MGI Symbol;Acc:MGI:1921974]
ENSMUST00000025918	121.612	0.174731	0.164814	1.06017	0.289069	0.58945	129.409	116.045	142.279	105.289	112.671	123.982	Stip1	ENSMUSG00000024966	stress-induced phosphoprotein 1 [Source:MGI Symbol;Acc:MGI:109130]
ENSMUST00000089302	83.5177	0.404034	0.38116	1.06001	0.28914	0.58945	113.233	77.0609	96.0386	56.98	49.947	107.847	Usp9x	ENSMUSG00000031010	ubiquitin specific peptidase 9, X chromosome [Source:MGI Symbol;Acc:MGI:894681]
ENSMUST00000056949	465.088	0.105315	0.0995204	1.05823	0.289952	0.590575	481.688	483.217	482.861	405.053	468.108	469.602	Spesp1	ENSMUSG00000046846	sperm equatorial segment protein 1 [Source:MGI Symbol;Acc:MGI:1913962]
ENSMUST00000035540	62.9351	-0.239953	0.227392	-1.05524	0.291316	0.591362	66.5016	53.4893	53.3548	79.2765	51.1086	73.8796	Phf2	ENSMUSG00000038025	PHD finger protein 2 [Source:MGI Symbol;Acc:MGI:1338034]
ENSMUST00000134600	73.1066	0.216974	0.205454	1.05607	0.290937	0.591362	75.4883	89.7533	71.1397	60.6961	68.532	73.0304	Gm5577	ENSMUSG00000084950	predicted gene 5577 [Source:MGI Symbol;Acc:MGI:3648213]
ENSMUST00000136759	209.036	-0.146407	0.138686	-1.05567	0.291117	0.591362	205.796	221.21	168.068	208.101	240.443	210.599	Uckl1os	ENSMUSG00000010492	uridine-cytidine kinase 1-like 1, opposite strand [Source:MGI Symbol;Acc:MGI:3801877]
ENSMUST00000215429	235.101	-0.135792	0.128701	-1.0551	0.291381	0.591362	199.505	251.128	221.422	257.649	234.635	246.265	4930444F02Rik	ENSMUSG00000110737	RIKEN cDNA 4930444F02 gene [Source:MGI Symbol;Acc:MGI:1921218]
ENSMUST00000231790	108.538	0.178338	0.169364	1.05299	0.292346	0.592792	105.144	120.578	120.048	102.812	99.894	102.752	Gm49600	ENSMUSG00000116795	predicted gene, 49600 [Source:MGI Symbol;Acc:MGI:6215009]
ENSMUST00000035651	106.334	-0.198452	0.188678	-1.0518	0.29289	0.593364	79.083	123.297	94.2602	131.302	102.217	107.847	Lrrc17	ENSMUSG00000039883	leucine rich repeat containing 17 [Source:MGI Symbol;Acc:MGI:1921761]
ENSMUST00000205409	269.24	-0.131957	0.125629	-1.05037	0.293548	0.593964	232.756	286.485	251.657	256.41	311.298	276.836	Gm44780	ENSMUSG00000108509	predicted gene 44780 [Source:MGI Symbol;Acc:MGI:5753356]
ENSMUST00000215715	235.4	-0.136827	0.130309	-1.05002	0.29371	0.593964	231.857	231.183	208.084	251.455	274.128	215.694	Rp9	ENSMUSG00000032239	retinitis pigmentosa 9 (human) [Source:MGI Symbol;Acc:MGI:2157166]
ENSMUST00000056331	85.0602	0.2144	0.204648	1.04765	0.2948	0.594547	81.779	82.5005	110.267	87.9474	60.4011	87.4666	Adam20	ENSMUSG00000046282	a disintegrin and metallopeptidase domain 20 [Source:MGI Symbol;Acc:MGI:2152342]
ENSMUST00000071421	85.5095	0.225832	0.21588	1.0461	0.295515	0.594547	124.017	73.4345	80.0322	71.8443	72.0166	91.7126	Gm4871	ENSMUSG00000061707	predicted gene 4871 [Source:MGI Symbol;Acc:MGI:3648713]
ENSMUST00000071562	119.154	-0.17031	0.162793	-1.04618	0.295479	0.594547	117.726	116.045	103.153	118.915	126.61	132.474	Ovca2	ENSMUSG00000038268	candidate tumor suppressor in ovarian cancer 2 [Source:MGI Symbol;Acc:MGI:2179725]
ENSMUST00000126498	133.251	-0.17045	0.163109	-1.04501	0.29602	0.594547	122.219	123.297	128.941	158.553	151.003	115.49	Gm13856	ENSMUSG00000087356	predicted gene 13856 [Source:MGI Symbol;Acc:MGI:3652199]
ENSMUST00000155684	184.438	0.144728	0.138224	1.04705	0.295075	0.594547	181.531	202.172	197.413	189.52	156.81	179.179	Fcnaos	ENSMUSG00000052403	ficolin A, opposite strand [Source:MGI Symbol;Acc:MGI:3701343]
ENSMUST00000163242	202.784	0.147824	0.14135	1.0458	0.295652	0.594547	231.857	192.199	216.976	159.792	204.434	211.448	Atxn10	ENSMUSG00000016541	ataxin 10 [Source:MGI Symbol;Acc:MGI:1859293]
ENSMUST00000182460	129.676	-0.170137	0.162835	-1.04485	0.296094	0.594547	106.043	126.017	134.276	147.405	120.802	143.513	1700018B08Rik	ENSMUSG00000031809	RIKEN cDNA 1700018B08 gene [Source:MGI Symbol;Acc:MGI:1923655]
ENSMUST00000192573	74.7234	-0.219611	0.209678	-1.04737	0.294928	0.594547	62.907	86.1269	58.6903	76.7991	75.5013	88.3158	Gm7496	ENSMUSG00000102254	predicted gene 7496 [Source:MGI Symbol;Acc:MGI:3643469]
ENSMUST00000109375	85.2089	-0.199719	0.191372	-1.04361	0.296664	0.594639	74.5897	84.3137	80.0322	79.2765	89.44	103.601	Elmo3	ENSMUSG00000014791	engulfment and cell motility 3 [Source:MGI Symbol;Acc:MGI:2679007]
ENSMUST00000198613	79.0701	0.236465	0.226581	1.04362	0.296662	0.594639	117.726	71.6213	67.5828	79.2765	59.2395	78.9747	Gm43075	ENSMUSG00000105004	predicted gene 43075 [Source:MGI Symbol;Acc:MGI:5663212]
ENSMUST00000001963	87.1813	-0.199401	0.191239	-1.04268	0.297098	0.594982	85.3737	74.3411	82.6999	105.289	96.4094	78.9747	Ace	ENSMUSG00000020681	angiotensin I converting enzyme (peptidyl-dipeptidase A) 1 [Source:MGI Symbol;Acc:MGI:87874]
ENSMUST00000172891	84.6108	-0.205327	0.197172	-1.04136	0.29771	0.595683	62.0083	90.6599	82.6999	94.1409	94.0863	84.0699	Gm20407	ENSMUSG00000092182	predicted gene 20407 [Source:MGI Symbol;Acc:MGI:5141872]
ENSMUST00000020712	111.161	0.175638	0.16895	1.03959	0.298533	0.596802	119.523	112.418	122.716	101.573	95.2478	115.49	4921536K21Rik	ENSMUSG00000020434	RIKEN cDNA 4921536K21 gene [Source:MGI Symbol;Acc:MGI:1914680]
ENSMUST00000103119	163.096	-0.148811	0.143281	-1.03859	0.298996	0.59711	147.382	168.627	147.615	177.133	173.072	164.743	Zfp385c	ENSMUSG00000014198	zinc finger protein 385C [Source:MGI Symbol;Acc:MGI:3608347]
ENSMUST00000141112	117.263	0.186276	0.179435	1.03812	0.299213	0.59711	106.043	114.231	153.84	101.573	124.287	103.601	AU022252	ENSMUSG00000078584	expressed sequence AU022252 [Source:MGI Symbol;Acc:MGI:2140466]
ENSMUST00000056955	108.126	0.18744	0.180666	1.03749	0.299506	0.597169	108.739	140.523	96.0386	101.573	103.379	98.5061	4933428G20Rik	ENSMUSG00000047988	RIKEN cDNA 4933428G20 gene [Source:MGI Symbol;Acc:MGI:1918475]
ENSMUST00000031002	76.3663	0.230746	0.222953	1.03495	0.300691	0.598481	105.144	67.0883	76.4752	61.9348	59.2395	88.3158	Man2b2	ENSMUSG00000029119	mannosidase 2, alpha B2 [Source:MGI Symbol;Acc:MGI:1195262]
ENSMUST00000156246	150.632	0.166006	0.160318	1.03548	0.300444	0.598481	133.902	191.292	152.95	148.643	130.095	146.91	Tmem82	ENSMUSG00000043085	transmembrane protein 82 [Source:MGI Symbol;Acc:MGI:2384869]
ENSMUST00000131019	74.3916	-0.210497	0.203679	-1.03347	0.301383	0.59923	64.7043	77.9675	64.0258	74.3217	90.6016	74.7288	4933405E24Rik	ENSMUSG00000086209	RIKEN cDNA 4933405E24 gene [Source:MGI Symbol;Acc:MGI:1918306]
ENSMUST00000237906	75.3016	-0.218297	0.211319	-1.03302	0.301596	0.59923	53.9202	73.4345	80.9215	79.2765	92.9247	71.332	Gm50315	ENSMUSG00000118077	predicted gene, 50315 [Source:MGI Symbol;Acc:MGI:6303171]
ENSMUST00000139469	255.783	0.126731	0.122878	1.03136	0.302374	0.60025	261.513	285.579	252.546	252.694	259.028	223.337	Gm16054	ENSMUSG00000087431	predicted gene 16054 [Source:MGI Symbol;Acc:MGI:3801819]
ENSMUST00000036904	473.159	0.22754	0.220899	1.03006	0.30298	0.600929	474.498	449.673	608.245	393.905	371.699	540.934	Rnf139	ENSMUSG00000037075	ring finger protein 139 [Source:MGI Symbol;Acc:MGI:1923091]
ENSMUST00000034029	106.095	-0.185539	0.18055	-1.02764	0.304121	0.600943	80.8804	97.0061	120.048	113.96	109.187	115.49	Ednra	ENSMUSG00000031616	endothelin receptor type A [Source:MGI Symbol;Acc:MGI:105923]
ENSMUST00000049577	80.9998	0.352106	0.342462	1.02816	0.303873	0.600943	97.0564	70.7147	104.931	87.9474	42.9777	82.3715	Adam26a	ENSMUSG00000048516	a disintegrin and metallopeptidase domain 26A (testase 3) [Source:MGI Symbol;Acc:MGI:105985]
ENSMUST00000175355	175.523	-0.150564	0.146572	-1.02723	0.304312	0.600943	156.369	185.853	155.618	189.52	204.434	161.346	Mir3968	ENSMUSG00000093096	microRNA 3968 [Source:MGI Symbol;Acc:MGI:4950407]
ENSMUST00000186777	68.5652	-0.213206	0.207349	-1.02824	0.303835	0.600943	57.5149	66.1817	66.6935	71.8443	77.8244	71.332	Pfkfb2	ENSMUSG00000026409	6-phosphofructo-2-kinase/fructose-2,6-biphosphatase 2 [Source:MGI Symbol;Acc:MGI:107815]
ENSMUST00000212968	236.3	0.139958	0.135978	1.02927	0.303354	0.600943	227.364	282.859	231.204	245.262	235.796	195.314	Katnb1	ENSMUSG00000031787	katanin p80 (WD40-containing) subunit B 1 [Source:MGI Symbol;Acc:MGI:1921437]
ENSMUST00000127307	134.606	0.172459	0.168176	1.02547	0.305143	0.601406	125.814	168.627	132.498	125.108	145.195	110.395	Gm15891	ENSMUSG00000087167	predicted gene 15891 [Source:MGI Symbol;Acc:MGI:3801795]
ENSMUST00000135462	71.9303	0.21093	0.205758	1.02514	0.305299	0.601406	76.387	82.5005	72.029	76.7991	62.7242	61.1417	Cacnb1	ENSMUSG00000020882	calcium channel, voltage-dependent, beta 1 subunit [Source:MGI Symbol;Acc:MGI:102522]
ENSMUST00000149452	419.519	0.112286	0.109542	1.02505	0.305342	0.601406	384.631	462.365	458.851	416.202	423.969	371.096	Gm16279	ENSMUSG00000084998	predicted gene 16279 [Source:MGI Symbol;Acc:MGI:3826576]
ENSMUST00000055096	65.0114	0.2471	0.241592	1.0228	0.306403	0.602451	90.7657	75.2477	46.2408	52.0252	60.4011	65.3877	Ttc12	ENSMUSG00000040219	tetratricopeptide repeat domain 12 [Source:MGI Symbol;Acc:MGI:2444588]
ENSMUST00000105778	271.435	0.130892	0.127969	1.02284	0.306382	0.602451	277.689	282.859	293.451	236.591	232.312	305.709	Prdm2	ENSMUSG00000057637	PR domain containing 2, with ZNF domain [Source:MGI Symbol;Acc:MGI:107628]
ENSMUST00000017851	156.028	0.172019	0.1683	1.02209	0.306736	0.602584	158.166	129.644	208.084	156.076	134.741	149.458	Serinc3	ENSMUSG00000017707	serine incorporator 3 [Source:MGI Symbol;Acc:MGI:1349457]
ENSMUST00000073179	344.771	0.128692	0.126107	1.02049	0.307494	0.603435	363.962	307.337	410.832	322.061	295.036	369.398	4933415F23Rik	ENSMUSG00000073730	RIKEN cDNA 4933415F23 gene [Source:MGI Symbol;Acc:MGI:1914005]
ENSMUST00000102303	608.784	0.366047	0.359244	1.01894	0.308233	0.603435	762.971	825.911	468.633	359.222	554.063	681.9	Gm23935	ENSMUSG00000076258	predicted gene, 23935 [Source:MGI Symbol;Acc:MGI:5453712]
ENSMUST00000133940	127.65	-0.169035	0.165816	-1.01941	0.308008	0.603435	131.206	132.363	96.9279	139.973	131.256	134.172	Gm12205	ENSMUSG00000084800	predicted gene 12205 [Source:MGI Symbol;Acc:MGI:3650261]
ENSMUST00000181570	105.234	-0.177026	0.173654	-1.01942	0.308005	0.603435	95.2591	105.165	96.0386	99.0956	125.448	110.395	Gpr137b-ps	ENSMUSG00000097715	G protein-coupled receptor 137B, pseudogene [Source:MGI Symbol;Acc:MGI:3710533]
ENSMUST00000015749	67.6056	0.218773	0.215467	1.01534	0.309943	0.605738	71.8937	75.2477	71.1397	49.5478	76.6629	61.1417	Srf	ENSMUSG00000015605	serum response factor [Source:MGI Symbol;Acc:MGI:106658]
ENSMUST00000162450	127.315	-0.1724	0.169733	-1.01571	0.309767	0.605738	121.321	118.764	119.159	107.767	166.103	130.775	Etohd2	ENSMUSG00000089875	ethanol decreased 2 [Source:MGI Symbol;Acc:MGI:1261417]
ENSMUST00000022036	63.1842	-0.222252	0.219266	-1.01362	0.310765	0.605914	62.0083	60.7421	51.5763	71.8443	74.3398	58.5942	Slc28a3	ENSMUSG00000021553	solute carrier family 28 (sodium-coupled nucleoside transporter), member 3 [Source:MGI Symbol;Acc:MGI:2137361]
ENSMUST00000027127	69.6826	-0.225545	0.222431	-1.014	0.310583	0.605914	61.1096	61.6487	71.1397	52.0252	81.3091	90.8634	Sf3b1	ENSMUSG00000025982	splicing factor 3b, subunit 1 [Source:MGI Symbol;Acc:MGI:1932339]
ENSMUST00000190732	7364.65	-0.079434	0.0784214	-1.01291	0.311102	0.605914	6885.62	7654.41	6943.24	7959.86	7674.42	7070.36	Gm29050	ENSMUSG00000101133	predicted gene 29050 [Source:MGI Symbol;Acc:MGI:5579756]
ENSMUST00000205787	222.45	0.137661	0.135896	1.01298	0.311068	0.605914	196.809	267.447	234.761	213.056	213.727	208.901	4732471J01Rik	ENSMUSG00000053714	RIKEN cDNA 4732471J01 gene [Source:MGI Symbol;Acc:MGI:3603586]
ENSMUST00000025696	192.482	0.141692	0.140188	1.01073	0.312146	0.607314	220.174	181.32	202.748	194.475	193.98	162.195	Ak3	ENSMUSG00000024782	adenylate kinase 3 [Source:MGI Symbol;Acc:MGI:1860835]
ENSMUST00000214327	81.648	0.203366	0.201294	1.01029	0.312356	0.607314	97.9551	94.2863	69.3612	80.5152	78.986	68.7844	Gm6980	ENSMUSG00000111357	predicted gene 6980 [Source:MGI Symbol;Acc:MGI:3779645]
ENSMUST00000035521	143.78	0.154244	0.153186	1.00691	0.313978	0.609525	155.47	160.468	137.833	132.54	149.841	126.529	Rsph6a	ENSMUSG00000040866	radial spoke head 6 homolog A (Chlamydomonas) [Source:MGI Symbol;Acc:MGI:1927643]
ENSMUST00000143594	220.852	-0.130678	0.129795	-1.0068	0.31403	0.609525	207.593	216.677	207.194	261.365	214.888	217.393	Rufy2	ENSMUSG00000020070	RUN and FYVE domain-containing 2 [Source:MGI Symbol;Acc:MGI:1917682]
ENSMUST00000026262	105.632	0.188973	0.188014	1.0051	0.314847	0.610587	110.537	97.0061	131.609	90.4248	83.6322	120.585	Hexa	ENSMUSG00000025232	hexosaminidase A [Source:MGI Symbol;Acc:MGI:96073]
ENSMUST00000163273	761.356	0.0853224	0.0850762	1.00289	0.315912	0.61213	800.716	809.593	741.632	717.205	758.498	740.494	Gm17178	ENSMUSG00000090758	predicted gene 17178 [Source:MGI Symbol;Acc:MGI:4938005]
ENSMUST00000093914	204.678	0.132046	0.132103	0.999567	0.31752	0.614197	233.654	205.798	202.748	185.804	205.596	194.465	Trim80	ENSMUSG00000070332	tripartite motif-containing 80 [Source:MGI Symbol;Acc:MGI:3588186]
ENSMUST00000210206	66.1434	0.216887	0.216928	0.999812	0.317402	0.614197	63.8056	77.9675	71.1397	73.083	52.2701	58.5942	Gm45577	ENSMUSG00000110137	predicted gene 45577 [Source:MGI Symbol;Acc:MGI:5791413]
ENSMUST00000203013	91.368	-0.194029	0.194407	-0.998055	0.318253	0.61509	92.5631	73.4345	88.9247	90.4248	119.641	83.2207	Gm43915	ENSMUSG00000108171	predicted gene, 43915 [Source:MGI Symbol;Acc:MGI:5690307]
ENSMUST00000003705	85.2103	0.193462	0.194437	0.994985	0.319743	0.617093	104.246	83.4071	85.3677	68.1282	89.44	80.6731	Aven	ENSMUSG00000003604	apoptosis, caspase activation inhibitor [Source:MGI Symbol;Acc:MGI:1921518]
ENSMUST00000071230	80.8129	0.205629	0.206704	0.9948	0.319833	0.617093	82.6777	80.6873	96.0386	94.1409	55.7548	75.578	Eif2s1	ENSMUSG00000021116	eukaryotic translation initiation factor 2, subunit 1 alpha [Source:MGI Symbol;Acc:MGI:95299]
ENSMUST00000057190	508.609	-0.100856	0.10156	-0.993064	0.320679	0.61715	486.181	453.299	534.437	483.091	540.125	554.522	Pabpc6	ENSMUSG00000046173	poly(A) binding protein, cytoplasmic 6 [Source:MGI Symbol;Acc:MGI:1914793]
ENSMUST00000064454	232.363	0.149194	0.150185	0.993402	0.320514	0.61715	308.244	213.957	209.862	227.92	234.635	199.56	Gcn1	ENSMUSG00000041638	GCN1 activator of EIF2AK4 [Source:MGI Symbol;Acc:MGI:2444248]
ENSMUST00000105001	135.436	0.151415	0.152466	0.993107	0.320658	0.61715	146.483	143.243	137.833	127.586	130.095	127.379	H2al2a	ENSMUSG00000062651	H2A histone family member L2A [Source:MGI Symbol;Acc:MGI:1915481]
ENSMUST00000192940	479.528	0.104775	0.105621	0.991987	0.321204	0.617637	549.088	503.162	438.399	484.33	440.231	461.96	Gm33051	ENSMUSG00000104444	predicted gene, 33051 [Source:MGI Symbol;Acc:MGI:5592210]
ENSMUST00000118714	81.7091	-0.19664	0.198545	-0.990404	0.321977	0.618152	67.4003	70.7147	90.7032	76.7991	92.9247	91.7126	Gm13535	ENSMUSG00000084292	predicted gene 13535 [Source:MGI Symbol;Acc:MGI:3651247]
ENSMUST00000142871	408.265	0.117112	0.118257	0.990322	0.322017	0.618152	470.903	421.568	379.708	450.885	377.507	349.017	4930458D05Rik	ENSMUSG00000087611	RIKEN cDNA 4930458D05 gene [Source:MGI Symbol;Acc:MGI:1923052]
ENSMUST00000062638	286.686	0.122154	0.123479	0.989268	0.322532	0.618618	320.825	257.474	319.24	265.081	263.674	293.82	Fam243	ENSMUSG00000051728	family with sequence similarity 243 [Source:MGI Symbol;Acc:MGI:1922578]
ENSMUST00000041231	677.083	0.225204	0.227864	0.988325	0.322993	0.61898	755.782	581.13	853.677	506.626	608.657	756.629	Psme4	ENSMUSG00000040850	proteasome (prosome, macropain) activator subunit 4 [Source:MGI Symbol;Acc:MGI:2143994]
ENSMUST00000097612	337.744	0.111939	0.113435	0.986812	0.323735	0.619877	324.42	353.574	372.594	349.312	331.044	295.518	Gm10545	ENSMUSG00000073594	predicted gene 10545 [Source:MGI Symbol;Acc:MGI:3704485]
ENSMUST00000027494	127.489	0.162757	0.165304	0.984596	0.324823	0.62016	144.686	135.083	122.716	136.256	124.287	101.903	Ppp1r7	ENSMUSG00000026275	protein phosphatase 1, regulatory subunit 7 [Source:MGI Symbol;Acc:MGI:1913635]
ENSMUST00000087200	297.568	0.12467	0.126745	0.983628	0.325299	0.62016	355.874	274.699	302.344	253.933	286.905	311.653	Gnl1	ENSMUSG00000024429	guanine nucleotide binding protein-like 1 [Source:MGI Symbol;Acc:MGI:95764]
ENSMUST00000099078	270.222	0.132235	0.13457	0.982649	0.32578	0.62016	341.495	242.062	264.996	248.978	252.058	271.741	Arfgef2	ENSMUSG00000074582	ADP-ribosylation factor guanine nucleotide-exchange factor 2 (brefeldin A-inhibited) [Source:MGI Symbol;Acc:MGI:2139354]
ENSMUST00000144183	81.8982	-0.191125	0.194506	-0.982617	0.325796	0.62016	66.5016	76.1543	87.1462	84.2313	84.7938	92.5618	Zfp85	ENSMUSG00000058331	zinc finger protein 85 [Source:MGI Symbol;Acc:MGI:107767]
ENSMUST00000163013	69.7829	0.214564	0.217656	0.985794	0.324234	0.62016	88.9684	75.2477	60.4688	58.2187	75.5013	60.2925	Fndc3a	ENSMUSG00000033487	fibronectin type III domain containing 3A [Source:MGI Symbol;Acc:MGI:1196463]
ENSMUST00000180820	3971.41	0.0845046	0.0858737	0.984057	0.325087	0.62016	3648.6	4380.69	4231.04	4017.09	4007.38	3543.67	Tmem147os	ENSMUSG00000097320	transmembrane protein 147, opposite strand [Source:MGI Symbol;Acc:MGI:3642392]
ENSMUST00000215829	194.913	0.145467	0.147924	0.983389	0.325416	0.62016	180.633	243.875	188.52	190.759	200.95	164.743	Siae	ENSMUSG00000001942	sialic acid acetylesterase [Source:MGI Symbol;Acc:MGI:104803]
ENSMUST00000065482	89.3754	0.199388	0.203224	0.981124	0.326532	0.62104	96.1578	94.2863	97.8171	81.7539	59.2395	106.998	Mllt11	ENSMUSG00000053192	myeloid/lymphoid or mixed-lineage leukemia; translocated to, 11 [Source:MGI Symbol;Acc:MGI:1929671]
ENSMUST00000034984	170.291	-0.140997	0.143995	-0.979181	0.32749	0.622342	147.382	184.946	153.84	174.656	180.042	180.878	Rasa2	ENSMUSG00000032413	RAS p21 protein activator 2 [Source:MGI Symbol;Acc:MGI:2149960]
ENSMUST00000019064	452.468	-0.10101	0.103252	-0.978284	0.327934	0.622662	464.613	443.327	401.05	506.626	444.877	454.317	Cxcl16	ENSMUSG00000018920	chemokine (C-X-C motif) ligand 16 [Source:MGI Symbol;Acc:MGI:1932682]
ENSMUST00000058902	211.036	-0.130665	0.133972	-0.975315	0.329404	0.624554	196.809	189.479	219.644	198.191	218.373	243.718	Eml6	ENSMUSG00000044072	echinoderm microtubule associated protein like 6 [Source:MGI Symbol;Acc:MGI:2442895]
ENSMUST00000136906	66.9441	0.21177	0.217164	0.975161	0.32948	0.624554	82.6777	61.6487	72.029	53.2639	61.5626	70.4828	Armh2	ENSMUSG00000085861	armadillo-like helical domain containing 2 [Source:MGI Symbol;Acc:MGI:1916676]
ENSMUST00000021356	156.942	0.15334	0.157343	0.97456	0.329779	0.624597	201.302	151.402	143.169	146.166	151.003	148.608	Dnaaf2	ENSMUSG00000020973	dynein, axonemal assembly factor 2 [Source:MGI Symbol;Acc:MGI:1923566]
ENSMUST00000066949	120.639	0.165358	0.170313	0.970905	0.331596	0.627515	121.321	116.951	144.058	131.302	96.4094	113.792	Zdhhc25	ENSMUSG00000054117	zinc finger, DHHC domain containing 25 [Source:MGI Symbol;Acc:MGI:1917323]
ENSMUST00000038121	70.407	0.20491	0.211446	0.969086	0.332502	0.628707	69.1976	67.9949	88.9247	59.4574	73.1782	63.6893	Gm7008	ENSMUSG00000035983	predicted gene 7008 [Source:MGI Symbol;Acc:MGI:3647211]
ENSMUST00000020315	387.074	0.109458	0.113193	0.967001	0.333543	0.63015	436.754	356.293	413.5	334.448	389.122	392.326	Cand1	ENSMUSG00000020114	cullin associated and neddylation disassociated 1 [Source:MGI Symbol;Acc:MGI:1261820]
ENSMUST00000021201	103.889	0.172559	0.178855	0.964799	0.334645	0.631682	104.246	99.7259	127.162	92.9022	90.6016	108.696	Cpd	ENSMUSG00000020841	carboxypeptidase D [Source:MGI Symbol;Acc:MGI:107265]
ENSMUST00000194920	97.4125	-0.169989	0.176288	-0.964269	0.334911	0.631682	93.4618	95.1929	86.2569	107.767	99.894	101.903	A930005N03Rik	ENSMUSG00000103001	RIKEN cDNA A930005N03 gene [Source:MGI Symbol;Acc:MGI:1924441]
ENSMUST00000111280	74.4328	0.196957	0.204706	0.962148	0.335976	0.633163	80.8804	84.3137	72.9182	63.1735	82.4707	62.8401	1700029I15Rik	ENSMUSG00000044916	RIKEN cDNA 1700029I15 gene [Source:MGI Symbol;Acc:MGI:1916742]
ENSMUST00000180857	90.7041	-0.175728	0.183191	-0.959262	0.337427	0.635371	78.1844	88.8467	88.0354	101.573	97.5709	90.0142	Gm26590	ENSMUSG00000097533	predicted gene, 26590 [Source:MGI Symbol;Acc:MGI:5477084]
ENSMUST00000029573	125.443	-0.154496	0.16153	-0.956456	0.338842	0.635925	133.003	111.512	111.156	141.211	130.095	125.68	Lrrc39	ENSMUSG00000027961	leucine rich repeat containing 39 [Source:MGI Symbol;Acc:MGI:1924557]
ENSMUST00000076372	112.608	0.160887	0.168119	0.956983	0.338576	0.635925	127.611	110.605	119.159	104.05	98.7325	115.49	Sf3b4	ENSMUSG00000068856	splicing factor 3b, subunit 4 [Source:MGI Symbol;Acc:MGI:109580]
ENSMUST00000144291	82.4919	0.182649	0.190884	0.956859	0.338638	0.635925	80.8804	90.6599	91.5924	80.5152	73.1782	78.1255	Gm15868	ENSMUSG00000085612	predicted gene 15868 [Source:MGI Symbol;Acc:MGI:3801810]
ENSMUST00000159236	76.892	-0.198192	0.206981	-0.95754	0.338295	0.635925	60.2109	66.1817	88.9247	75.5604	81.3091	89.165	Tnik	ENSMUSG00000027692	TRAF2 and NCK interacting kinase [Source:MGI Symbol;Acc:MGI:1916264]
ENSMUST00000120194	275.04	0.116722	0.122211	0.955086	0.339534	0.636697	311.839	277.419	267.663	271.274	283.42	238.623	Fam104a	ENSMUSG00000041629	family with sequence similarity 104, member A [Source:MGI Symbol;Acc:MGI:106351]
ENSMUST00000000421	350.241	0.107067	0.112673	0.950248	0.341986	0.639103	389.124	336.348	363.702	315.867	372.86	323.542	Tssk3	ENSMUSG00000000411	testis-specific serine kinase 3 [Source:MGI Symbol;Acc:MGI:1929914]
ENSMUST00000087588	222.332	-0.118688	0.124892	-0.950325	0.341947	0.639103	209.39	214.864	216.087	225.443	225.342	242.869	Gm17080	ENSMUSG00000067389	predicted gene 17080 [Source:MGI Symbol;Acc:MGI:4937907]
ENSMUST00000151101	75.8261	-0.198289	0.20872	-0.950022	0.342101	0.639103	72.7923	80.6873	57.801	96.6182	73.1782	73.8796	Gm15243	ENSMUSG00000085695	predicted gene 15243 [Source:MGI Symbol;Acc:MGI:3705116]
ENSMUST00000207270	183.385	0.130729	0.137402	0.95143	0.341386	0.639103	192.316	189.479	192.967	162.269	195.142	168.14	Lyrm1	ENSMUSG00000030922	LYR motif containing 1 [Source:MGI Symbol;Acc:MGI:1921169]
ENSMUST00000227408	245.567	-0.116743	0.122916	-0.949777	0.342226	0.639103	213.884	252.941	240.097	252.694	259.028	254.757	1700087M22Rik	ENSMUSG00000115723	RIKEN cDNA 1700087M22 gene [Source:MGI Symbol;Acc:MGI:1925717]
ENSMUST00000022871	72.8238	-0.194128	0.205182	-0.946124	0.344085	0.639519	68.299	77.0609	58.6903	80.5152	70.8551	81.5223	Sdc2	ENSMUSG00000022261	syndecan 2 [Source:MGI Symbol;Acc:MGI:1349165]
ENSMUST00000037877	74.2074	0.190504	0.201442	0.945703	0.3443	0.639519	77.2857	74.3411	86.2569	64.4122	67.3704	75.578	Tcfl5	ENSMUSG00000038932	transcription factor-like 5 (basic helix-loop-helix) [Source:MGI Symbol;Acc:MGI:2672878]
ENSMUST00000058615	76.7359	0.193167	0.20366	0.948476	0.342887	0.639519	74.5897	74.3411	96.0386	73.083	77.8244	64.5385	Cir1	ENSMUSG00000041777	corepressor interacting with RBPJ, 1 [Source:MGI Symbol;Acc:MGI:1914185]
ENSMUST00000059341	175.519	-0.140496	0.148374	-0.946902	0.343689	0.639519	169.849	189.479	141.39	172.179	204.434	175.782	Zc2hc1c	ENSMUSG00000045064	zinc finger, C2HC-type containing 1C [Source:MGI Symbol;Acc:MGI:1919600]
ENSMUST00000129337	99.1509	-0.175591	0.185559	-0.94628	0.344006	0.639519	105.144	98.8193	74.6967	113.96	108.025	94.2602	Gm11508	ENSMUSG00000086193	predicted gene 11508 [Source:MGI Symbol;Acc:MGI:3650928]
ENSMUST00000167763	183.544	-0.138537	0.146528	-0.945465	0.344421	0.639519	143.787	198.545	181.406	206.862	184.688	185.973	4930579G18Rik	ENSMUSG00000040840	RIKEN cDNA 4930579G18 gene [Source:MGI Symbol;Acc:MGI:1923163]
ENSMUST00000172175	71.7028	0.208354	0.220069	0.946769	0.343757	0.639519	75.4883	80.6873	75.586	43.3543	77.8244	77.2764	Zbtb3	ENSMUSG00000071661	zinc finger and BTB domain containing 3 [Source:MGI Symbol;Acc:MGI:1922541]
ENSMUST00000162380	131.961	-0.14715	0.156354	-0.941131	0.346638	0.643108	120.422	137.803	117.381	136.256	144.033	135.871	4933413C19Rik	ENSMUSG00000089952	RIKEN cDNA 4933413C19 gene [Source:MGI Symbol;Acc:MGI:1921702]
ENSMUST00000014920	129.533	0.153495	0.163506	0.938771	0.347848	0.643774	137.497	154.122	117.381	133.779	113.833	120.585	Nol3	ENSMUSG00000014776	nucleolar protein 3 (apoptosis repressor with CARD domain) [Source:MGI Symbol;Acc:MGI:1925938]
ENSMUST00000094077	207.14	-0.125957	0.13417	-0.938785	0.347841	0.643774	211.188	191.292	190.299	226.681	232.312	191.068	Kdm6b	ENSMUSG00000018476	KDM1 lysine (K)-specific demethylase 6B [Source:MGI Symbol;Acc:MGI:2448492]
ENSMUST00000155812	408.982	-0.100612	0.107159	-0.938901	0.347782	0.643774	377.442	422.475	382.376	464.511	418.161	388.929	Tomm6os	ENSMUSG00000084880	translocase of outer mitochondrial membrane 6, opposite strand [Source:MGI Symbol;Acc:MGI:3705171]
ENSMUST00000217440	64.4576	-0.200203	0.21345	-0.937938	0.348276	0.644041	55.7176	64.3685	59.5795	74.3217	67.3704	65.3877	Gm34885	ENSMUSG00000111748	predicted gene, 34885 [Source:MGI Symbol;Acc:MGI:5594044]
ENSMUST00000024702	123.226	0.155432	0.166238	0.934994	0.349791	0.645265	131.206	121.484	137.833	95.3795	127.771	125.68	Paqr4	ENSMUSG00000023909	progestin and adipoQ receptor family member IV [Source:MGI Symbol;Acc:MGI:1923748]
ENSMUST00000030614	189.989	0.132709	0.141897	0.935248	0.34966	0.645265	216.58	184.04	194.745	209.34	160.295	174.933	CK137956	ENSMUSG00000028813	cDNA sequence CK137956 [Source:MGI Symbol;Acc:MGI:3616080]
ENSMUST00000049294	193.282	0.136279	0.145589	0.936057	0.349244	0.645265	204.897	223.023	178.739	165.985	217.211	169.838	Snrpd2	ENSMUSG00000040824	small nuclear ribonucleoprotein D2 [Source:MGI Symbol;Acc:MGI:98345]
ENSMUST00000124015	381.087	-0.106081	0.113898	-0.931375	0.35166	0.646609	371.151	366.266	362.813	361.699	461.139	363.454	2900089D17Rik	ENSMUSG00000087484	RIKEN cDNA 2900089D17 gene [Source:MGI Symbol;Acc:MGI:1914527]
ENSMUST00000180753	68.2854	-0.196492	0.2109	-0.931686	0.351499	0.646609	71.8937	58.9289	60.4688	75.5604	63.8857	78.9747	Gm2366	ENSMUSG00000097491	predicted gene 2366 [Source:MGI Symbol;Acc:MGI:3780534]
ENSMUST00000182191	91.1837	0.170217	0.18254	0.932492	0.351082	0.646609	91.6644	103.352	94.2602	89.1861	87.1169	81.5223	Smim1	ENSMUSG00000078350	small integral membrane protein 1 [Source:MGI Symbol;Acc:MGI:1916109]
ENSMUST00000203069	101.528	-0.168017	0.180383	-0.931447	0.351622	0.646609	97.9551	99.7259	88.0354	126.347	104.54	92.5618	Gm44287	ENSMUSG00000108109	predicted gene, 44287 [Source:MGI Symbol;Acc:MGI:5690679]
ENSMUST00000019662	279.467	0.109692	0.117962	0.929892	0.352427	0.647495	301.055	287.392	280.113	284.9	278.774	244.567	Ap4m1	ENSMUSG00000019518	adaptor-related protein complex AP-4, mu 1 [Source:MGI Symbol;Acc:MGI:1337063]
ENSMUST00000180931	114.11	-0.162919	0.175667	-0.927434	0.353701	0.64931	102.448	117.858	104.042	118.915	98.7325	142.664	Gm26672	ENSMUSG00000097330	predicted gene, 26672 [Source:MGI Symbol;Acc:MGI:5477166]
ENSMUST00000043711	292.182	-0.127444	0.137541	-0.926587	0.354141	0.649483	215.681	310.057	311.236	333.209	295.036	287.876	Gm10135	ENSMUSG00000063656	predicted gene 10135 [Source:MGI Symbol;Acc:MGI:3710643]
ENSMUST00000156926	156.961	-0.13848	0.149522	-0.926151	0.354367	0.649483	132.105	164.094	151.172	177.133	166.103	151.156	Gm16105	ENSMUSG00000084849	predicted gene 16105 [Source:MGI Symbol;Acc:MGI:3801737]
ENSMUST00000029023	225.021	0.124577	0.134988	0.922874	0.356073	0.649527	255.222	213.051	233.872	237.83	224.181	185.973	1700021F07Rik	ENSMUSG00000027518	RIKEN cDNA 1700021F07 gene [Source:MGI Symbol;Acc:MGI:1919471]
ENSMUST00000117213	152.952	-0.144891	0.156657	-0.924892	0.355022	0.649527	131.206	172.254	131.609	163.508	173.072	146.061	Gm13142	ENSMUSG00000081405	predicted gene 13142 [Source:MGI Symbol;Acc:MGI:3651745]
ENSMUST00000126319	277.159	-0.109146	0.118277	-0.922804	0.356109	0.649527	278.588	262.007	257.882	304.719	297.359	262.4	Tbl3	ENSMUSG00000040688	transducin (beta)-like 3 [Source:MGI Symbol;Acc:MGI:2384863]
ENSMUST00000127340	1828.16	0.0746718	0.0808769	0.923277	0.355863	0.649527	1840.48	2035.31	1749.15	1767.62	1880.56	1695.83	Fam57a	ENSMUSG00000069808	family with sequence similarity 57, member A [Source:MGI Symbol;Acc:MGI:2151840]
ENSMUST00000132184	760.778	0.0830452	0.0899208	0.923536	0.355728	0.649527	803.412	834.977	710.508	715.966	745.721	754.081	Gm16153	ENSMUSG00000085687	predicted gene 16153 [Source:MGI Symbol;Acc:MGI:3802057]
ENSMUST00000218113	111.008	-0.159858	0.173205	-0.922942	0.356037	0.649527	98.8538	115.138	99.5956	120.153	131.256	101.054	Gm40773	ENSMUSG00000112458	predicted gene, 40773 [Source:MGI Symbol;Acc:MGI:5623658]
ENSMUST00000034109	76.6907	0.29908	0.324431	0.92186	0.356602	0.649903	89.8671	62.5553	102.263	49.5478	65.0473	90.8634	1700011L22Rik	ENSMUSG00000031682	RIKEN cDNA 1700011L22 gene [Source:MGI Symbol;Acc:MGI:1914937]
ENSMUST00000129876	146.381	-0.144202	0.157308	-0.916688	0.359306	0.654306	141.99	152.309	121.827	156.076	171.911	134.172	A630052C17Rik	ENSMUSG00000086725	RIKEN cDNA A630052C17 gene [Source:MGI Symbol;Acc:MGI:2444673]
ENSMUST00000017126	187.356	0.12619	0.138645	0.910167	0.362734	0.65864	192.316	191.292	203.637	154.837	198.627	183.425	Pom121l2	ENSMUSG00000016982	POM121 membrane glycoprotein-like 2 (rat) [Source:MGI Symbol;Acc:MGI:2684870]
ENSMUST00000023006	76.5604	-0.183974	0.202546	-0.908303	0.363718	0.65864	72.7923	59.8355	82.6999	74.3217	84.7938	84.9191	Lrrc6	ENSMUSG00000022375	leucine rich repeat containing 6 (testis) [Source:MGI Symbol;Acc:MGI:1859553]
ENSMUST00000030669	120.652	0.14896	0.163619	0.910409	0.362607	0.65864	133.003	122.391	125.384	101.573	127.771	113.792	Slc9a1	ENSMUSG00000028854	solute carrier family 9 (sodium/hydrogen exchanger), member 1 [Source:MGI Symbol;Acc:MGI:102462]
ENSMUST00000073251	150.528	0.138255	0.151949	0.909873	0.362889	0.65864	174.342	149.589	148.504	139.973	159.134	131.625	Ccdc177	ENSMUSG00000062961	coiled-coil domain containing 177 [Source:MGI Symbol;Acc:MGI:2686414]
ENSMUST00000146561	79.2897	-0.18132	0.199174	-0.910362	0.362632	0.65864	65.603	81.5939	75.586	75.5604	97.5709	79.8239	Ednra	ENSMUSG00000031616	endothelin receptor type A [Source:MGI Symbol;Acc:MGI:105923]
ENSMUST00000155203	70.0641	-0.189387	0.208468	-0.908472	0.363629	0.65864	61.1096	59.8355	75.586	68.1282	80.1476	75.578	Zbtb10	ENSMUSG00000069114	zinc finger and BTB domain containing 10 [Source:MGI Symbol;Acc:MGI:2139883]
ENSMUST00000180999	285.52	0.10851	0.119464	0.908314	0.363712	0.65864	297.46	308.244	282.78	304.719	243.927	275.987	Gm16892	ENSMUSG00000097876	predicted gene, 16892 [Source:MGI Symbol;Acc:MGI:4439816]
ENSMUST00000023781	109.286	0.164154	0.181068	0.906585	0.364626	0.659563	121.321	105.165	121.827	82.9926	98.7325	125.68	Krt88	ENSMUSG00000063971	keratin 88 [Source:MGI Symbol;Acc:MGI:1913572]
ENSMUST00000154271	741.887	0.0804143	0.0887341	0.906239	0.364809	0.659563	749.491	807.779	729.182	709.772	768.952	686.146	Pdf	ENSMUSG00000078931	peptide deformylase (mitochondrial) [Source:MGI Symbol;Acc:MGI:1915273]
ENSMUST00000034441	108.235	-0.156517	0.173665	-0.901254	0.367454	0.66276	112.334	91.5665	102.263	121.392	120.802	101.054	Aars	ENSMUSG00000031960	alanyl-tRNA synthetase [Source:MGI Symbol;Acc:MGI:2384560]
ENSMUST00000103220	157.805	0.137322	0.152324	0.901512	0.367316	0.66276	179.734	162.281	155.618	126.347	152.164	170.687	Snrnp200	ENSMUSG00000003660	small nuclear ribonucleoprotein 200 (U5) [Source:MGI Symbol;Acc:MGI:2444401]
ENSMUST00000143074	199.942	-0.122727	0.136134	-0.901521	0.367311	0.66276	203.998	198.545	170.735	214.294	221.858	190.219	Gm42669	ENSMUSG00000106631	predicted gene 42669 [Source:MGI Symbol;Acc:MGI:5662806]
ENSMUST00000019649	668.764	0.0844377	0.0941463	0.896877	0.369785	0.665378	732.417	625.553	708.73	626.78	629.565	689.543	Ubb	ENSMUSG00000019505	ubiquitin B [Source:MGI Symbol;Acc:MGI:98888]
ENSMUST00000154452	127.799	-0.152697	0.170172	-0.897307	0.369555	0.665378	113.233	139.616	111.156	142.45	109.187	151.156	Gm12352	ENSMUSG00000084835	predicted gene 12352 [Source:MGI Symbol;Acc:MGI:3705172]
ENSMUST00000182152	106.925	0.173196	0.193021	0.897291	0.369563	0.665378	136.598	119.671	83.5892	90.4248	116.156	95.1094	Anapc16	ENSMUSG00000020107	anaphase promoting complex subunit 16 [Source:MGI Symbol;Acc:MGI:1289325]
ENSMUST00000131221	641.629	0.081712	0.0911948	0.896016	0.370244	0.665677	636.259	707.147	634.922	624.303	649.311	597.83	2310058D17Rik	ENSMUSG00000085379	RIKEN cDNA 2310058D17 gene [Source:MGI Symbol;Acc:MGI:1922944]
ENSMUST00000028977	456.396	0.102035	0.114099	0.894267	0.371179	0.666829	507.749	432.448	480.193	372.847	448.362	496.777	Kif3b	ENSMUSG00000027475	kinesin family member 3B [Source:MGI Symbol;Acc:MGI:107688]
ENSMUST00000202662	71.2422	0.182895	0.205388	0.890485	0.373205	0.669939	76.387	81.5939	69.3612	60.6961	73.1782	66.2369	Gm43372	ENSMUSG00000107335	predicted gene 43372 [Source:MGI Symbol;Acc:MGI:5663509]
ENSMUST00000193809	73.1018	0.184179	0.207237	0.888735	0.374145	0.671096	78.1844	88.8467	66.6935	70.6056	60.4011	73.8796	Tug1	ENSMUSG00000056579	taurine upregulated gene 1 [Source:MGI Symbol;Acc:MGI:2144114]
ENSMUST00000180252	989.728	-0.0770469	0.0873433	-0.882116	0.377714	0.676427	946.3	1017.2	923.927	1030.59	1093.03	927.316	Tmem151b	ENSMUSG00000096847	transmembrane protein 151B [Source:MGI Symbol;Acc:MGI:2685169]
ENSMUST00000211969	192.705	0.121727	0.137989	0.882149	0.377696	0.676427	196.809	199.452	204.527	211.817	178.88	164.743	K230015D01Rik	ENSMUSG00000110630	RIKEN cDNA K230015D01 gene [Source:MGI Symbol;Acc:MGI:3642019]
ENSMUST00000063663	2345.11	0.0625071	0.0711513	0.878509	0.379667	0.678047	2306.89	2506.75	2372.51	2313.88	2356.8	2213.84	B3gat2	ENSMUSG00000026156	beta-1,3-glucuronyltransferase 2 (glucuronosyltransferase S) [Source:MGI Symbol;Acc:MGI:2389490]
ENSMUST00000101448	143.182	0.130784	0.149029	0.877574	0.380175	0.678047	153.673	143.243	152.061	137.495	135.902	136.72	Drc1	ENSMUSG00000073102	dynein regulatory complex subunit 1 [Source:MGI Symbol;Acc:MGI:2685906]
ENSMUST00000129343	116.698	-0.151442	0.172297	-0.878958	0.379424	0.678047	99.7525	126.924	104.042	139.973	120.802	108.696	A430078I02Rik	ENSMUSG00000085589	RIKEN cDNA A430078I02 gene [Source:MGI Symbol;Acc:MGI:2444132]
ENSMUST00000180617	93.0026	-0.175875	0.20056	-0.87692	0.38053	0.678047	88.9684	97.0061	75.586	81.7539	128.933	85.7683	A630072L19Rik	ENSMUSG00000097160	RIKEN cDNA A630072L19 gene [Source:MGI Symbol;Acc:MGI:3641830]
ENSMUST00000199616	285.324	0.11844	0.135115	0.876588	0.38071	0.678047	345.988	298.271	247.211	241.546	305.49	273.439	4933428P19Rik	ENSMUSG00000105203	RIKEN cDNA 4933428P19 gene [Source:MGI Symbol;Acc:MGI:1918479]
ENSMUST00000206292	79.517	-0.171382	0.194867	-0.879486	0.379138	0.678047	73.691	77.0609	72.9182	90.4248	88.2785	74.7288	Gm44986	ENSMUSG00000108573	predicted gene 44986 [Source:MGI Symbol;Acc:MGI:5753562]
ENSMUST00000238949	376.709	0.217607	0.247975	0.877539	0.380194	0.678047	370.252	338.161	507.76	302.242	311.298	430.54	C2cd6	ENSMUSG00000072295	C2 calcium dependent domain containing 6 [Source:MGI Symbol;Acc:MGI:1920713]
ENSMUST00000153443	129.447	-0.141064	0.161374	-0.874145	0.382039	0.67988	138.395	126.017	104.931	133.779	139.387	134.172	Gm17029	ENSMUSG00000086740	predicted gene 17029 [Source:MGI Symbol;Acc:MGI:4937856]
ENSMUST00000067161	243.643	0.108103	0.123824	0.873033	0.382645	0.680425	231.857	252.034	274.777	227.92	235.796	239.472	Gm9939	ENSMUSG00000054247	predicted gene 9939 [Source:MGI Symbol;Acc:MGI:3708775]
ENSMUST00000045153	86.9788	0.180412	0.206974	0.871669	0.383389	0.681214	105.144	68.9015	103.153	68.1282	97.5709	78.9747	Pik3ip1	ENSMUSG00000034614	phosphoinositide-3-kinase interacting protein 1 [Source:MGI Symbol;Acc:MGI:1917016]
ENSMUST00000110731	62.0703	0.205532	0.236097	0.870542	0.384004	0.68124	70.995	47.1431	81.8107	54.5026	53.4317	64.5385	Kdelr2	ENSMUSG00000079111	KDEL (Lys-Asp-Glu-Leu) endoplasmic reticulum protein retention receptor 2 [Source:MGI Symbol;Acc:MGI:1914163]
ENSMUST00000194105	92.87	-0.158074	0.181561	-0.870641	0.38395	0.68124	81.779	93.3797	88.0354	92.9022	106.863	94.2602	Gm36975	ENSMUSG00000104302	predicted gene, 36975 [Source:MGI Symbol;Acc:MGI:5610203]
ENSMUST00000191858	77.5654	0.181748	0.209176	0.868876	0.384915	0.682322	96.1578	63.4619	88.0354	63.1735	78.986	75.578	Gm38134	ENSMUSG00000102540	predicted gene, 38134 [Source:MGI Symbol;Acc:MGI:5611362]
ENSMUST00000118793	99.0726	0.162842	0.187802	0.867092	0.385892	0.682986	97.9551	126.017	89.8139	85.47	106.863	88.3158	Gm16181	ENSMUSG00000081650	predicted gene 16181 [Source:MGI Symbol;Acc:MGI:3802038]
ENSMUST00000232133	68.347	0.187829	0.216536	0.867429	0.385707	0.682986	76.387	79.7807	62.2473	74.3217	51.1086	66.2369	Gm49794	ENSMUSG00000116879	predicted gene, 49794 [Source:MGI Symbol;Acc:MGI:6215323]
ENSMUST00000053956	179.731	0.121361	0.140105	0.866215	0.386372	0.683304	197.708	190.386	175.182	157.314	168.426	189.37	Cypt4	ENSMUSG00000047995	cysteine-rich perinuclear theca 4 [Source:MGI Symbol;Acc:MGI:1916573]
ENSMUST00000094844	400.175	-0.0928154	0.107358	-0.864541	0.387291	0.684395	403.503	352.667	407.275	398.86	393.768	444.976	Cfap65	ENSMUSG00000047021	cilia and flagella associated protein 65 [Source:MGI Symbol;Acc:MGI:2444274]
ENSMUST00000190610	108.45	0.160534	0.185886	0.863618	0.387798	0.684757	106.942	142.336	95.1494	97.8569	92.9247	115.49	Cspp1	ENSMUSG00000056763	centrosome and spindle pole associated protein 1 [Source:MGI Symbol;Acc:MGI:2681832]
ENSMUST00000080723	146.959	0.230332	0.266948	0.862836	0.388228	0.684984	191.417	106.072	178.739	127.586	133.579	144.362	Tax1bp1	ENSMUSG00000004535	Tax1 (human T cell leukemia virus type I) binding protein 1 [Source:MGI Symbol;Acc:MGI:1289308]
ENSMUST00000031250	64.1215	0.194505	0.226439	0.858973	0.390356	0.686185	64.7043	83.4071	56.9118	54.5026	70.8551	54.3482	Nudt9	ENSMUSG00000029310	nudix (nucleoside diphosphate linked moiety X)-type motif 9 [Source:MGI Symbol;Acc:MGI:1921417]
ENSMUST00000041364	147.735	0.131821	0.153215	0.860364	0.389589	0.686185	150.078	174.974	137.833	146.166	144.033	133.323	Nop14	ENSMUSG00000036693	NOP14 nucleolar protein [Source:MGI Symbol;Acc:MGI:1922666]
ENSMUST00000099995	193.237	0.131455	0.153078	0.858747	0.39048	0.686185	248.932	166.814	191.188	168.463	187.011	197.012	Ttc30a2	ENSMUSG00000075272	tetratricopeptide repeat domain 30A2 [Source:MGI Symbol;Acc:MGI:3700200]
ENSMUST00000124012	68.6647	0.192108	0.224006	0.857602	0.391112	0.686185	93.4618	69.8081	56.0225	69.3669	63.8857	59.4433	Sgms1	ENSMUSG00000040451	sphingomyelin synthase 1 [Source:MGI Symbol;Acc:MGI:2444110]
ENSMUST00000136582	100.777	0.151798	0.177004	0.857597	0.391115	0.686185	93.4618	116.045	108.488	100.334	92.9247	93.411	Dpm1	ENSMUSG00000078919	dolichol-phosphate (beta-D) mannosyltransferase 1 [Source:MGI Symbol;Acc:MGI:1330239]
ENSMUST00000213244	74.7546	-0.17315	0.201992	-0.857212	0.391328	0.686185	65.603	73.4345	71.1397	79.2765	89.44	69.6336	Gm48129	ENSMUSG00000111323	predicted gene, 48129 [Source:MGI Symbol;Acc:MGI:6097488]
ENSMUST00000215849	108.608	0.16305	0.189743	0.85932	0.390164	0.686185	126.713	126.017	90.7032	94.1409	126.61	87.4666	Gm39329	ENSMUSG00000111126	predicted gene, 39329 [Source:MGI Symbol;Acc:MGI:5622214]
ENSMUST00000221002	624.027	-0.090928	0.105911	-0.858535	0.390597	0.686185	524.824	661.817	624.251	701.102	650.473	581.696	Gm20789	ENSMUSG00000113354	predicted gene, 20789 [Source:MGI Symbol;Acc:MGI:5434145]
ENSMUST00000220083	137.784	-0.13012	0.152103	-0.855473	0.392289	0.687339	129.409	133.27	131.609	141.211	154.487	136.72	Gm4129	ENSMUSG00000112294	predicted gene 4129 [Source:MGI Symbol;Acc:MGI:3782305]
ENSMUST00000022967	84.6971	-0.161913	0.189484	-0.854498	0.392829	0.687754	74.5897	77.0609	88.0354	85.47	96.4094	86.6174	Kcnv1	ENSMUSG00000022342	potassium channel, subfamily V, member 1 [Source:MGI Symbol;Acc:MGI:1914748]
ENSMUST00000036720	96.4083	0.156603	0.183516	0.85335	0.393465	0.688337	112.334	91.5665	100.485	105.289	81.3091	87.4666	Fkbpl	ENSMUSG00000033739	FK506 binding protein-like [Source:MGI Symbol;Acc:MGI:1932127]
ENSMUST00000195710	101.838	0.148292	0.174048	0.852017	0.394205	0.689099	104.246	104.259	112.045	99.0956	102.217	89.165	Gm38342	ENSMUSG00000102457	predicted gene, 38342 [Source:MGI Symbol;Acc:MGI:5611570]
ENSMUST00000206502	195.29	0.13039	0.153141	0.851442	0.394524	0.689126	217.478	213.051	179.628	231.636	175.395	154.553	Gm45141	ENSMUSG00000108420	predicted gene 45141 [Source:MGI Symbol;Acc:MGI:5753717]
ENSMUST00000140488	74.9638	0.183272	0.216639	0.845977	0.397566	0.692839	104.246	67.0883	67.5828	75.5604	67.3704	67.9353	Gm16835	ENSMUSG00000087479	predicted gene, 16835 [Source:MGI Symbol;Acc:MGI:4439759]
ENSMUST00000186228	153.701	-0.142681	0.168545	-0.846546	0.397248	0.692839	145.585	155.935	135.166	210.578	138.225	136.72	Ms4a12	ENSMUSG00000101031	membrane-spanning 4-domains, subfamily A, member 12 [Source:MGI Symbol;Acc:MGI:2685812]
ENSMUST00000238662	131.85	0.221806	0.262075	0.846344	0.397361	0.692839	137.497	120.578	168.957	91.6635	116.156	156.251	Gm8251	ENSMUSG00000091844	predicted gene 8251 [Source:MGI Symbol;Acc:MGI:3647616]
ENSMUST00000042614	561.886	0.086154	0.102436	0.841051	0.400319	0.693907	638.955	549.399	549.554	488.046	564.518	580.846	Hectd4	ENSMUSG00000042744	HECT domain E3 ubiquitin protein ligase 4 [Source:MGI Symbol;Acc:MGI:3647820]
ENSMUST00000050342	70.4118	0.173312	0.205969	0.841448	0.400097	0.693907	79.9817	68.9015	75.586	61.9348	63.8857	72.1812	Adam30	ENSMUSG00000043468	a disintegrin and metallopeptidase domain 30 [Source:MGI Symbol;Acc:MGI:1918328]
ENSMUST00000074608	98.6023	0.16263	0.192746	0.843752	0.398808	0.693907	120.422	102.446	88.9247	82.9926	116.156	80.6731	1700029P11Rik	ENSMUSG00000061633	RIKEN cDNA 1700029P11 gene [Source:MGI Symbol;Acc:MGI:1913596]
ENSMUST00000125518	169.579	-0.126828	0.150324	-0.843697	0.398839	0.693907	145.585	180.413	159.175	206.862	164.941	160.497	Gm13563	ENSMUSG00000085767	predicted gene 13563 [Source:MGI Symbol;Acc:MGI:3652052]
ENSMUST00000182467	128.125	0.133288	0.15827	0.842155	0.399701	0.693907	133.902	138.71	128.941	135.018	114.994	117.188	Gm6981	ENSMUSG00000098076	predicted pseudogene 6981 [Source:MGI Symbol;Acc:MGI:3646966]
ENSMUST00000214534	382.164	0.0925708	0.109832	0.842838	0.399319	0.693907	411.591	401.623	368.148	412.486	357.76	341.375	Gm47950	ENSMUSG00000111793	predicted gene, 47950 [Source:MGI Symbol;Acc:MGI:6097220]
ENSMUST00000231737	65.1097	0.186903	0.222019	0.841834	0.399881	0.693907	73.691	78.8741	56.0225	50.7865	65.0473	66.2369	Morf4l1-ps1	ENSMUSG00000116875	mortality factor 4 like 1, pseudogene 1 [Source:MGI Symbol;Acc:MGI:3612158]
ENSMUST00000048490	63.9478	-0.205476	0.244755	-0.839517	0.401179	0.694676	60.2109	75.2477	42.6838	53.2639	89.44	62.8401	Larp1b	ENSMUSG00000025762	La ribonucleoprotein domain family, member 1B [Source:MGI Symbol;Acc:MGI:1914604]
ENSMUST00000192230	69.0683	-0.189185	0.225443	-0.839168	0.401375	0.694676	69.1976	74.3411	49.7978	91.6635	58.0779	71.332	Capn2	ENSMUSG00000026509	calpain 2 [Source:MGI Symbol;Acc:MGI:88264]
ENSMUST00000036161	112.566	-0.142756	0.170388	-0.837832	0.402125	0.695347	106.043	116.045	98.7064	107.767	134.741	112.093	Pi4ka	ENSMUSG00000041720	phosphatidylinositol 4-kinase alpha [Source:MGI Symbol;Acc:MGI:2448506]
ENSMUST00000190721	92.1544	-0.156736	0.187173	-0.837385	0.402376	0.695347	90.7657	91.5665	78.2537	113.96	91.7631	86.6174	Gm9220	ENSMUSG00000101548	predicted gene 9220 [Source:MGI Symbol;Acc:MGI:3648318]
ENSMUST00000023061	106.705	0.164059	0.196368	0.835466	0.403455	0.695979	114.131	110.605	115.602	65.6509	106.863	127.379	Josd1	ENSMUSG00000022426	Josephin domain containing 1 [Source:MGI Symbol;Acc:MGI:1921408]
ENSMUST00000072866	66.0687	-0.1807	0.216365	-0.835162	0.403626	0.695979	60.2109	65.2751	59.5795	85.47	63.8857	61.9909	Ubap1	ENSMUSG00000028437	ubiquitin-associated protein 1 [Source:MGI Symbol;Acc:MGI:2149543]
ENSMUST00000212621	62.6133	0.199067	0.238375	0.8351	0.403662	0.695979	60.2109	79.7807	62.2473	52.0252	44.1392	77.2764	Gm39139	ENSMUSG00000110542	predicted gene, 39139 [Source:MGI Symbol;Acc:MGI:5622024]
ENSMUST00000021803	124.33	0.149891	0.180104	0.832247	0.40527	0.696388	126.713	108.792	158.286	109.005	102.217	140.966	Nup153	ENSMUSG00000021374	nucleoporin 153 [Source:MGI Symbol;Acc:MGI:2385621]
ENSMUST00000048431	316.96	0.0937784	0.112568	0.833084	0.404798	0.696388	313.636	322.749	346.806	286.139	305.49	326.938	Naif1	ENSMUSG00000039164	nuclear apoptosis inducing factor 1 [Source:MGI Symbol;Acc:MGI:1918504]
ENSMUST00000120357	545.468	-0.0800962	0.0961702	-0.832859	0.404924	0.696388	489.776	544.866	556.668	580.948	527.348	573.204	Gm9974	ENSMUSG00000055497	predicted gene 9974 [Source:MGI Symbol;Acc:MGI:3708610]
ENSMUST00000139512	166.223	-0.121586	0.146372	-0.830668	0.406161	0.696388	152.774	165.908	157.397	193.236	177.718	150.307	Gm16295	ENSMUSG00000087041	predicted gene 16295 [Source:MGI Symbol;Acc:MGI:3826546]
ENSMUST00000140080	2203.18	0.0652725	0.0785373	0.831103	0.405916	0.696388	2219.72	2409.74	2127.08	2199.92	2253.42	2009.19	Gm12945	ENSMUSG00000087394	predicted gene 12945 [Source:MGI Symbol;Acc:MGI:3704237]
ENSMUST00000176660	153.742	0.132982	0.159647	0.832977	0.404858	0.696388	153.673	182.226	148.504	120.153	146.356	171.537	Gm20636	ENSMUSG00000093637	predicted gene 20636 [Source:MGI Symbol;Acc:MGI:5313083]
ENSMUST00000181526	101.367	-0.144927	0.174542	-0.830326	0.406354	0.696388	97.9551	92.4731	98.7064	95.3795	114.994	108.696	2610020C07Rik	ENSMUSG00000097537	RIKEN cDNA 2610020C07 gene [Source:MGI Symbol;Acc:MGI:1917168]
ENSMUST00000186450	110.676	-0.151265	0.18217	-0.830348	0.406342	0.696388	90.7657	125.111	97.8171	138.734	108.025	103.601	Gm28379	ENSMUSG00000100130	predicted gene 28379 [Source:MGI Symbol;Acc:MGI:5579085]
ENSMUST00000103184	71.4646	0.17926	0.216041	0.829749	0.406681	0.696421	79.083	75.2477	74.6967	47.0704	72.0166	80.6731	Adra1d	ENSMUSG00000027335	adrenergic receptor, alpha 1d [Source:MGI Symbol;Acc:MGI:106673]
ENSMUST00000187295	81.7091	0.15808	0.190836	0.828355	0.407469	0.697246	89.8671	80.6873	88.0354	78.0378	75.5013	78.1255	4933400F21Rik	ENSMUSG00000102009	RIKEN cDNA 4933400F21 gene [Source:MGI Symbol;Acc:MGI:1921653]
ENSMUST00000035824	88.5601	0.167102	0.202219	0.826342	0.40861	0.698145	106.043	83.4071	93.3709	66.8896	75.5013	106.149	Ptpdc1	ENSMUSG00000038042	protein tyrosine phosphatase domain containing 1 [Source:MGI Symbol;Acc:MGI:2145430]
ENSMUST00000189185	80.1455	0.163393	0.197606	0.826867	0.408313	0.698145	80.8804	81.5939	92.4817	63.1735	77.8244	84.9191	Gm29666	ENSMUSG00000100967	predicted gene 29666 [Source:MGI Symbol;Acc:MGI:5580372]
ENSMUST00000116375	118.773	0.150726	0.182818	0.824463	0.409676	0.69944	154.571	120.578	100.485	94.1409	123.125	119.736	Cstf1	ENSMUSG00000027498	cleavage stimulation factor, 3' pre-RNA, subunit 1 [Source:MGI Symbol;Acc:MGI:1914587]
ENSMUST00000204087	109.717	0.141364	0.171933	0.822204	0.410961	0.701105	115.03	101.539	128.941	106.528	97.5709	108.696	Rab11fip5	ENSMUSG00000051343	RAB11 family interacting protein 5 (class I) [Source:MGI Symbol;Acc:MGI:1098586]
ENSMUST00000027068	116.264	0.160486	0.19638	0.817224	0.4138	0.703092	134.801	87.0335	147.615	96.6182	99.894	131.625	Tram1	ENSMUSG00000025935	translocating chain-associating membrane protein 1 [Source:MGI Symbol;Acc:MGI:1919515]
ENSMUST00000030949	64.6464	-0.172775	0.211492	-0.816935	0.413966	0.703092	62.907	61.6487	57.801	69.3669	67.3704	68.7844	Tas1r3	ENSMUSG00000029072	taste receptor, type 1, member 3 [Source:MGI Symbol;Acc:MGI:1933547]
ENSMUST00000046191	101.631	-0.15274	0.186715	-0.818039	0.413335	0.703092	101.55	97.9127	88.0354	135.018	96.4094	90.8634	Gnpnat1	ENSMUSG00000037722	glucosamine-phosphate N-acetyltransferase 1 [Source:MGI Symbol;Acc:MGI:1858963]
ENSMUST00000153672	3253.27	-0.0624935	0.0762701	-0.81937	0.412575	0.703092	2935.96	3398.84	3211.96	3392.79	3399.88	3180.22	Gm11638	ENSMUSG00000086487	predicted gene 11638 [Source:MGI Symbol;Acc:MGI:3651788]
ENSMUST00000174217	179.921	0.117158	0.143321	0.817453	0.41367	0.703092	162.659	204.891	193.856	163.508	188.173	166.441	Gm20389	ENSMUSG00000092522	predicted gene 20389 [Source:MGI Symbol;Acc:MGI:5141854]
ENSMUST00000207855	127.41	-0.133075	0.162902	-0.816902	0.413985	0.703092	116.827	111.512	135.166	146.166	135.902	118.887	Xrra1	ENSMUSG00000035211	X-ray radiation resistance associated 1 [Source:MGI Symbol;Acc:MGI:2181647]
ENSMUST00000209854	2487.13	-0.0639675	0.078388	-0.816037	0.414479	0.703405	2331.15	2639.11	2323.6	2619.84	2613.51	2395.57	Gm45528	ENSMUSG00000110225	predicted gene 45528 [Source:MGI Symbol;Acc:MGI:5791364]
ENSMUST00000207266	441.993	-0.0877645	0.107804	-0.814109	0.415583	0.704751	479.89	425.195	379.708	475.659	454.169	437.333	Gm44775	ENSMUSG00000108955	predicted gene 44775 [Source:MGI Symbol;Acc:MGI:5753351]
ENSMUST00000035799	143.501	0.123556	0.152075	0.81247	0.416522	0.705816	150.078	161.375	136.944	147.405	133.579	131.625	Fgl2	ENSMUSG00000039899	fibrinogen-like protein 2 [Source:MGI Symbol;Acc:MGI:103266]
ENSMUST00000167009	177.77	-0.114572	0.141428	-0.810112	0.417876	0.707583	155.47	174.974	180.517	203.146	183.526	168.989	Gm17135	ENSMUSG00000091351	predicted gene 17135 [Source:MGI Symbol;Acc:MGI:4937962]
ENSMUST00000028119	102.805	-0.139694	0.173632	-0.804541	0.421085	0.710894	100.651	95.1929	96.9279	110.244	116.156	97.6569	Mastl	ENSMUSG00000026779	microtubule associated serine/threonine kinase-like [Source:MGI Symbol;Acc:MGI:1914371]
ENSMUST00000139161	476.064	-0.0850825	0.105671	-0.805161	0.420727	0.710894	447.538	476.871	458.851	521.491	526.186	425.445	Ntan1	ENSMUSG00000022681	N-terminal Asn amidase [Source:MGI Symbol;Acc:MGI:108471]
ENSMUST00000199915	778.024	-0.0667858	0.0829844	-0.8048	0.420935	0.710894	736.91	761.543	782.537	785.333	784.052	817.771	Gm43737	ENSMUSG00000105692	predicted gene 43737 [Source:MGI Symbol;Acc:MGI:5663874]
ENSMUST00000236754	458.867	0.0898511	0.111596	0.805144	0.420737	0.710894	467.309	540.333	411.721	470.704	418.161	444.976	Gm19519	ENSMUSG00000118391	predicted gene, 19519 [Source:MGI Symbol;Acc:MGI:5011704]
ENSMUST00000025955	68.7693	0.170789	0.212817	0.802518	0.422254	0.712196	64.7043	67.9949	85.3677	71.8443	61.5626	61.1417	Eif3a	ENSMUSG00000024991	eukaryotic translation initiation factor 3, subunit A [Source:MGI Symbol;Acc:MGI:95301]
ENSMUST00000228387	73.6033	0.169064	0.210772	0.80212	0.422484	0.712196	67.4003	89.7533	75.586	81.7539	68.532	58.5942	Gm48964	ENSMUSG00000115447	predicted gene, 48964 [Source:MGI Symbol;Acc:MGI:6118298]
ENSMUST00000199318	77.305	-0.164301	0.205173	-0.800791	0.423253	0.712963	71.8937	76.1543	72.029	71.8443	70.8551	101.054	Oaz3	ENSMUSG00000028141	ornithine decarboxylase antizyme 3 [Source:MGI Symbol;Acc:MGI:1858170]
ENSMUST00000137099	214.727	-0.108436	0.135615	-0.799585	0.423951	0.713609	177.038	211.238	232.093	208.101	232.312	227.583	Gm15792	ENSMUSG00000085606	predicted gene 15792 [Source:MGI Symbol;Acc:MGI:3783234]
ENSMUST00000181462	1198.88	0.0673429	0.0843507	0.798368	0.424657	0.713738	1295.88	1276.49	1107.11	1179.24	1206.86	1127.73	Gm26631	ENSMUSG00000097445	predicted gene, 26631 [Source:MGI Symbol;Acc:MGI:5477125]
ENSMUST00000214559	787.315	-0.0704833	0.0882751	-0.79845	0.424609	0.713738	734.214	816.845	751.413	815.062	851.423	754.931	Gm47350	ENSMUSG00000111471	predicted gene, 47350 [Source:MGI Symbol;Acc:MGI:6096250]
ENSMUST00000100209	194.079	0.107253	0.134486	0.797505	0.425158	0.714052	207.593	192.199	202.748	196.953	195.142	169.838	Fam186a	ENSMUSG00000045350	family with sequence similarity 186, member A [Source:MGI Symbol;Acc:MGI:2685766]
ENSMUST00000055454	68.9327	0.171817	0.216058	0.795235	0.426477	0.714337	77.2857	75.2477	66.6935	76.7991	48.7855	68.7844	Prr3	ENSMUSG00000038500	proline-rich polypeptide 3 [Source:MGI Symbol;Acc:MGI:1922460]
ENSMUST00000170214	1152.42	0.0700504	0.0881087	0.795045	0.426588	0.714337	1273.42	1189.46	1075.99	1204.01	1122.07	1049.6	Gm17200	ENSMUSG00000090608	predicted gene 17200 [Source:MGI Symbol;Acc:MGI:4938027]
ENSMUST00000177474	142.489	0.121539	0.152756	0.795641	0.426241	0.714337	141.99	163.188	139.612	143.689	138.225	128.228	Zfp169	ENSMUSG00000050954	zinc finger protein 169 [Source:MGI Symbol;Acc:MGI:1915161]
ENSMUST00000215551	65.08	-0.171912	0.215993	-0.795912	0.426083	0.714337	58.4136	59.8355	65.8043	73.083	56.9164	76.4272	Gm47205	ENSMUSG00000111312	predicted gene, 47205 [Source:MGI Symbol;Acc:MGI:6096005]
ENSMUST00000042942	197.969	0.123678	0.155863	0.793503	0.427485	0.715312	207.593	164.094	248.989	178.372	173.072	215.694	Sec23ip	ENSMUSG00000055319	Sec23 interacting protein [Source:MGI Symbol;Acc:MGI:2450915]
ENSMUST00000033154	117.745	-0.135714	0.171479	-0.791432	0.428692	0.716803	133.003	93.3797	110.267	118.915	127.771	123.133	Plk1	ENSMUSG00000030867	polo like kinase 1 [Source:MGI Symbol;Acc:MGI:97621]
ENSMUST00000042750	63.8098	0.185657	0.234824	0.790622	0.429164	0.717065	85.3737	70.7147	48.0193	52.0252	63.8857	62.8401	Tmem246	ENSMUSG00000039611	transmembrane protein 246 [Source:MGI Symbol;Acc:MGI:1914313]
ENSMUST00000052107	210.012	0.110158	0.139802	0.787958	0.430721	0.718608	234.553	226.65	191.188	210.578	223.019	174.084	Zswim3	ENSMUSG00000045822	zinc finger SWIM-type containing 3 [Source:MGI Symbol;Acc:MGI:1914788]
ENSMUST00000182265	313.017	0.096788	0.122783	0.788286	0.430529	0.718608	337.002	362.639	271.22	305.958	293.874	307.407	Gm26944	ENSMUSG00000098066	predicted gene, 26944 [Source:MGI Symbol;Acc:MGI:5504059]
ENSMUST00000154193	87.8488	-0.146219	0.185782	-0.78705	0.431253	0.718966	75.4883	87.9401	87.1462	87.9474	91.7631	96.8077	Stard9	ENSMUSG00000033705	START domain containing 9 [Source:MGI Symbol;Acc:MGI:3045258]
ENSMUST00000033326	89.2687	0.146167	0.186761	0.782643	0.433837	0.720647	103.347	84.3137	94.2602	82.9926	78.986	91.7126	Wee1	ENSMUSG00000031016	WEE 1 homolog 1 (S. pombe) [Source:MGI Symbol;Acc:MGI:103075]
ENSMUST00000106969	115.896	-0.134604	0.17161	-0.784355	0.432832	0.720647	106.942	113.325	110.267	115.199	145.195	104.45	Tomt	ENSMUSG00000078630	transmembrane O-methyltransferase [Source:MGI Symbol;Acc:MGI:3769724]
ENSMUST00000131801	912.54	0.0734613	0.0937846	0.783298	0.433452	0.720647	821.385	983.66	1000.4	929.022	906.016	834.754	Gm14252	ENSMUSG00000085546	predicted gene 14252 [Source:MGI Symbol;Acc:MGI:3649403]
ENSMUST00000194834	261.307	-0.11172	0.142578	-0.783572	0.433291	0.720647	257.919	295.551	200.97	234.113	297.359	281.931	1700003N22Rik	ENSMUSG00000102463	RIKEN cDNA 1700003N22 gene [Source:MGI Symbol;Acc:MGI:1919464]
ENSMUST00000219608	102.776	0.15335	0.195944	0.782622	0.433849	0.720647	108.739	92.4731	125.384	79.2765	85.9553	124.831	Gm48485	ENSMUSG00000112666	predicted gene, 48485 [Source:MGI Symbol;Acc:MGI:6098005]
ENSMUST00000036951	454.382	0.0934481	0.119779	0.780171	0.43529	0.722512	479.89	401.623	528.213	403.815	410.03	502.721	Pebp1	ENSMUSG00000032959	phosphatidylethanolamine binding protein 1 [Source:MGI Symbol;Acc:MGI:1344408]
ENSMUST00000025053	114.718	0.136584	0.175463	0.778418	0.436323	0.72344	131.206	123.297	107.599	97.8569	97.5709	130.775	Mllt1	ENSMUSG00000024212	myeloid/lymphoid or mixed-lineage leukemia; translocated to, 1 [Source:MGI Symbol;Acc:MGI:1927238]
ENSMUST00000220785	250.197	0.0938363	0.120591	0.778139	0.436487	0.72344	272.297	255.661	246.321	246.5	248.574	231.829	Gm48133	ENSMUSG00000113068	predicted gene, 48133 [Source:MGI Symbol;Acc:MGI:6097494]
ENSMUST00000113367	63.0802	0.172154	0.221588	0.776911	0.437211	0.723583	71.8937	58.9289	69.3612	70.6056	49.947	57.745	Ddx43	ENSMUSG00000070291	DEAD (Asp-Glu-Ala-Asp) box polypeptide 43 [Source:MGI Symbol;Acc:MGI:3642857]
ENSMUST00000168137	73.3734	-0.162014	0.208394	-0.777442	0.436898	0.723583	73.691	79.7807	54.244	76.7991	80.1476	75.578	5830462I19Rik	ENSMUSG00000091102	RIKEN cDNA 5830462I19 gene [Source:MGI Symbol;Acc:MGI:3642105]
ENSMUST00000034723	97.1566	0.141764	0.182826	0.775403	0.438101	0.723795	103.347	93.3797	110.267	82.9926	85.9553	106.998	Aldh1a2	ENSMUSG00000013584	aldehyde dehydrogenase family 1, subfamily A2 [Source:MGI Symbol;Acc:MGI:107928]
ENSMUST00000117506	150.644	-0.118782	0.153253	-0.775073	0.438296	0.723795	129.409	158.655	144.058	172.179	160.295	139.267	Ube4a	ENSMUSG00000059890	ubiquitination factor E4A [Source:MGI Symbol;Acc:MGI:2154580]
ENSMUST00000127525	88.979	0.150191	0.193753	0.775169	0.43824	0.723795	83.5764	95.1929	102.263	96.6182	66.2088	90.0142	9830144P21Rik	ENSMUSG00000087528	RIKEN cDNA 9830144P21 gene [Source:MGI Symbol;Acc:MGI:3041171]
ENSMUST00000038627	120.449	0.136417	0.176876	0.771257	0.440555	0.724573	131.206	100.632	147.615	105.289	108.025	129.926	Zfp91	ENSMUSG00000024695	zinc finger protein 91 [Source:MGI Symbol;Acc:MGI:104854]
ENSMUST00000042953	127.09	-0.1309	0.169924	-0.77034	0.441098	0.724573	148.281	105.165	111.156	131.302	123.125	143.513	Nbas	ENSMUSG00000020576	neuroblastoma amplified sequence [Source:MGI Symbol;Acc:MGI:1918419]
ENSMUST00000107576	65.3686	0.173774	0.225657	0.77008	0.441252	0.724573	60.2109	69.8081	79.143	47.0704	60.4011	75.578	1700001P01Rik	ENSMUSG00000018543	RIKEN cDNA 1700001P01 gene [Source:MGI Symbol;Acc:MGI:1919465]
ENSMUST00000109100	202.306	0.114343	0.148281	0.77112	0.440636	0.724573	219.276	222.117	187.631	195.714	231.15	157.949	Fam186b	ENSMUSG00000078907	family with sequence similarity 186, member B [Source:MGI Symbol;Acc:MGI:3647604]
ENSMUST00000133496	168.207	0.108851	0.141038	0.771783	0.440243	0.724573	175.241	163.188	184.963	169.701	155.649	160.497	Maats1os	ENSMUSG00000087568	MYCBP-associated, testis expressed 1, opposite strand [Source:MGI Symbol;Acc:MGI:3783093]
ENSMUST00000135670	451.266	-0.0791455	0.102496	-0.77218	0.440008	0.724573	430.463	453.299	431.285	515.297	439.069	438.182	9130017K11Rik	ENSMUSG00000055134	RIKEN cDNA 9130017K11 gene [Source:MGI Symbol;Acc:MGI:1926030]
ENSMUST00000159884	69.8488	-0.158094	0.205327	-0.769963	0.441322	0.724573	65.603	63.4619	69.3612	74.3217	67.3704	78.9747	E230015B07Rik	ENSMUSG00000071332	RIKEN cDNA E230015B07 gene [Source:MGI Symbol;Acc:MGI:2443140]
ENSMUST00000177048	72.2046	-0.155942	0.202009	-0.771953	0.440142	0.724573	64.7043	67.9949	72.029	81.7539	72.0166	74.7288	4931403E22Rik	ENSMUSG00000093772	RIKEN cDNA 4931403E22 gene [Source:MGI Symbol;Acc:MGI:1918192]
ENSMUST00000238574	79.191	0.152566	0.198585	0.768268	0.442328	0.725699	72.7923	91.5665	86.2569	76.7991	66.2088	81.5223	BX470216.1	ENSMUSG00000118403	novel transcript, antisense to Ccdc30
ENSMUST00000022281	545.659	-0.073006	0.0953668	-0.765528	0.443957	0.727262	505.952	523.107	565.561	595.813	536.64	546.879	Mtrex	ENSMUSG00000016018	Mtr4 exosome RNA helicase [Source:MGI Symbol;Acc:MGI:1919448]
ENSMUST00000107894	152.318	0.20848	0.272134	0.766092	0.443622	0.727262	154.571	190.386	144.058	191.998	120.802	112.093	Dgke	ENSMUSG00000000276	diacylglycerol kinase, epsilon [Source:MGI Symbol;Acc:MGI:1889276]
ENSMUST00000120856	158.914	-0.114266	0.149358	-0.76505	0.444242	0.727262	145.585	154.122	158.286	184.566	139.387	171.537	Celf5	ENSMUSG00000034818	CUGBP, Elav-like family member 5 [Source:MGI Symbol;Acc:MGI:2442333]
ENSMUST00000018875	108.71	-0.130289	0.170778	-0.762917	0.445513	0.727694	114.131	96.0995	101.374	104.05	121.964	114.641	Ap2b1	ENSMUSG00000035152	adaptor-related protein complex 2, beta 1 subunit [Source:MGI Symbol;Acc:MGI:1919020]
ENSMUST00000054471	223.566	0.0988311	0.129383	0.763866	0.444947	0.727694	245.337	213.957	232.983	222.965	229.989	196.163	4930430F08Rik	ENSMUSG00000046567	RIKEN cDNA 4930430F08 gene [Source:MGI Symbol;Acc:MGI:1921197]
ENSMUST00000082414	64.2061	-0.177294	0.232249	-0.763378	0.445238	0.727694	44.0349	58.0223	78.2537	70.6056	73.1782	61.1417	mt-Nd4	ENSMUSG00000064363	mitochondrially encoded NADH dehydrogenase 4 [Source:MGI Symbol;Acc:MGI:102498]
ENSMUST00000163707	153.048	0.115182	0.15128	0.76138	0.44643	0.727694	173.443	167.721	136.055	147.405	151.003	142.664	Gm17189	ENSMUSG00000091709	predicted gene 17189 [Source:MGI Symbol;Acc:MGI:4938016]
ENSMUST00000166897	113.103	0.130814	0.171721	0.761781	0.446191	0.727694	128.51	103.352	123.605	94.1409	112.671	116.339	Tomm70a	ENSMUSG00000022752	translocase of outer mitochondrial membrane 70A [Source:MGI Symbol;Acc:MGI:106295]
ENSMUST00000173576	101.227	0.135009	0.177199	0.76191	0.446114	0.727694	97.0564	117.858	103.153	87.9474	104.54	96.8077	Gm20522	ENSMUSG00000092241	predicted gene 20522 [Source:MGI Symbol;Acc:MGI:5141987]
ENSMUST00000164150	70.1616	0.156257	0.205468	0.760496	0.446958	0.728032	77.2857	77.9675	66.6935	66.8896	65.0473	67.0861	1700071M16Rik	ENSMUSG00000090307	RIKEN cDNA 1700071M16 gene [Source:MGI Symbol;Acc:MGI:1920754]
ENSMUST00000133742	124.151	0.124017	0.163396	0.758998	0.447854	0.728445	133.003	132.363	122.716	136.256	103.379	117.188	Gm12977	ENSMUSG00000085009	predicted gene 12977 [Source:MGI Symbol;Acc:MGI:3650699]
ENSMUST00000199249	86.3379	-0.145943	0.192236	-0.759185	0.447742	0.728445	76.387	71.6213	97.8171	90.4248	91.7631	90.0142	Gm42918	ENSMUSG00000106209	predicted gene 42918 [Source:MGI Symbol;Acc:MGI:5663055]
ENSMUST00000133695	83.9295	0.145914	0.192636	0.75746	0.448774	0.728897	89.8671	87.9401	87.1462	65.6509	90.6016	82.3715	Ing4	ENSMUSG00000030330	inhibitor of growth family, member 4 [Source:MGI Symbol;Acc:MGI:107307]
ENSMUST00000189608	67.3169	-0.172643	0.227877	-0.757616	0.448681	0.728897	70.0963	66.1817	52.4656	92.9022	66.2088	56.0466	Gm28180	ENSMUSG00000101295	predicted gene 28180 [Source:MGI Symbol;Acc:MGI:5578886]
ENSMUST00000027867	277.242	0.0944499	0.125089	0.755061	0.450212	0.730187	275.892	271.98	313.015	260.126	239.281	303.161	Ccdc181	ENSMUSG00000026578	coiled-coil domain containing 181 [Source:MGI Symbol;Acc:MGI:1922145]
ENSMUST00000214683	100.392	-0.132053	0.174808	-0.755418	0.449998	0.730187	99.7525	97.0061	90.7032	111.483	96.4094	106.998	Gm47173	ENSMUSG00000110735	predicted gene, 47173 [Source:MGI Symbol;Acc:MGI:6095954]
ENSMUST00000076592	77.104	-0.15677	0.207931	-0.753949	0.45088	0.730226	70.0963	58.0223	90.7032	84.2313	75.5013	84.0699	Ccdc36	ENSMUSG00000047220	coiled-coil domain containing 36 [Source:MGI Symbol;Acc:MGI:3612242]
ENSMUST00000139752	106.55	-0.133465	0.176939	-0.754301	0.450668	0.730226	106.942	100.632	96.0386	117.676	125.448	92.5618	Gm11574	ENSMUSG00000085262	predicted gene 11574 [Source:MGI Symbol;Acc:MGI:3705166]
ENSMUST00000042390	65.2318	-0.161336	0.214342	-0.752703	0.451629	0.730917	70.0963	58.0223	56.9118	70.6056	62.7242	73.0304	Man1b1	ENSMUSG00000036646	mannosidase, alpha, class 1B, member 1 [Source:MGI Symbol;Acc:MGI:2684954]
ENSMUST00000025762	65.9961	-0.259878	0.346619	-0.749753	0.453404	0.732209	52.1229	81.5939	47.1301	52.0252	69.6935	93.411	Banf1	ENSMUSG00000024844	barrier to autointegration factor 1 [Source:MGI Symbol;Acc:MGI:1346330]
ENSMUST00000086723	101.555	0.145819	0.194487	0.749759	0.4534	0.732209	127.611	93.3797	100.485	71.8443	102.217	113.792	Man2a1	ENSMUSG00000024085	mannosidase 2, alpha 1 [Source:MGI Symbol;Acc:MGI:104669]
ENSMUST00000168680	90.0541	0.141031	0.188153	0.749553	0.453524	0.732209	80.8804	99.7259	103.153	76.7991	90.6016	89.165	Myh15	ENSMUSG00000092009	myosin, heavy chain 15 [Source:MGI Symbol;Acc:MGI:3643515]
ENSMUST00000195463	93.4075	-0.145839	0.194679	-0.749125	0.453782	0.732209	94.3604	92.4731	78.2537	125.108	83.6322	86.6174	Gm36992	ENSMUSG00000103435	predicted gene, 36992 [Source:MGI Symbol;Acc:MGI:5610220]
ENSMUST00000237203	89.244	0.143791	0.192055	0.748696	0.45404	0.732209	97.0564	105.165	79.143	73.083	95.2478	85.7683	8030462N17Rik	ENSMUSG00000047466	RIKEN cDNA 8030462N17 gene [Source:MGI Symbol;Acc:MGI:2444951]
ENSMUST00000125269	72.564	0.163509	0.218968	0.746726	0.455229	0.733604	97.9551	74.3411	57.801	70.6056	65.0473	69.6336	Gm11739	ENSMUSG00000086826	predicted gene 11739 [Source:MGI Symbol;Acc:MGI:3650571]
ENSMUST00000031628	291.091	0.088765	0.120082	0.739201	0.459785	0.735321	319.028	297.364	282.78	267.558	318.267	261.551	Ptcd1	ENSMUSG00000029624	pentatricopeptide repeat domain 1 [Source:MGI Symbol;Acc:MGI:1919049]
ENSMUST00000043141	487.826	0.0828554	0.11211	0.739056	0.459873	0.735321	482.586	474.151	550.444	494.239	400.738	524.8	Hydin	ENSMUSG00000059854	HYDIN, axonemal central pair apparatus protein [Source:MGI Symbol;Acc:MGI:2389007]
ENSMUST00000049146	74.1454	-0.147806	0.200276	-0.738012	0.460507	0.735321	77.2857	69.8081	64.0258	79.2765	75.5013	78.9747	Ephx4	ENSMUSG00000033805	epoxide hydrolase 4 [Source:MGI Symbol;Acc:MGI:2686228]
ENSMUST00000055406	147.283	0.121603	0.163434	0.744054	0.456844	0.735321	180.633	123.297	155.618	154.837	139.387	129.926	Stkld1	ENSMUSG00000049897	serine/threonine kinase-like domain containing 1 [Source:MGI Symbol;Acc:MGI:2685557]
ENSMUST00000055604	146.792	0.113433	0.152752	0.742596	0.457726	0.735321	154.571	138.71	165.4	126.347	142.872	152.854	Zfp526	ENSMUSG00000046541	zinc finger protein 526 [Source:MGI Symbol;Acc:MGI:2445181]
ENSMUST00000102944	91.2464	0.143055	0.192455	0.743319	0.457289	0.735321	78.1844	102.446	107.599	76.7991	84.7938	97.6569	Creb3	ENSMUSG00000028466	cAMP responsive element binding protein 3 [Source:MGI Symbol;Acc:MGI:99946]
ENSMUST00000136382	1027.56	0.0702948	0.0949103	0.740645	0.458909	0.735321	1019.99	1116.93	1017.3	1047.94	1095.35	867.873	Gm15343	ENSMUSG00000085468	predicted gene 15343 [Source:MGI Symbol;Acc:MGI:3705126]
ENSMUST00000143663	173.826	-0.10822	0.146618	-0.738114	0.460445	0.735321	169.849	140.523	191.188	182.088	183.526	175.782	Mroh8	ENSMUSG00000074627	maestro heat-like repeat family member 8 [Source:MGI Symbol;Acc:MGI:3603828]
ENSMUST00000148665	79.1162	0.154444	0.208968	0.739082	0.459857	0.735321	88.0697	67.0883	94.2602	68.1282	91.7631	65.3877	Sf3a2	ENSMUSG00000020211	splicing factor 3a, subunit 2 [Source:MGI Symbol;Acc:MGI:104912]
ENSMUST00000162770	1090.91	0.111332	0.150048	0.741975	0.458102	0.735321	1034.37	1358.99	1004.85	1111.11	1057.02	979.117	5330439A09Rik	ENSMUSG00000089708	RIKEN cDNA 5330439A09 gene [Source:MGI Symbol;Acc:MGI:1924353]
ENSMUST00000173494	160.931	0.119306	0.160969	0.74117	0.458591	0.735321	188.721	140.523	175.182	146.166	132.418	182.576	Ak9	ENSMUSG00000091415	adenylate kinase 9 [Source:MGI Symbol;Acc:MGI:2685080]
ENSMUST00000207625	477.671	-0.0744038	0.100708	-0.738805	0.460025	0.735321	464.613	492.283	437.509	530.162	482.047	459.412	A930030B08Rik	ENSMUSG00000108985	RIKEN cDNA A930030B08 gene [Source:MGI Symbol;Acc:MGI:1924443]
ENSMUST00000215474	409.686	0.0857761	0.115824	0.740576	0.458951	0.735321	431.362	454.206	377.93	400.099	447.2	347.319	Siae	ENSMUSG00000001942	sialic acid acetylesterase [Source:MGI Symbol;Acc:MGI:104803]
ENSMUST00000044405	65.9255	-0.172261	0.234849	-0.733496	0.463256	0.738151	45.8322	67.0883	72.029	74.3217	83.6322	52.6498	Lpar6	ENSMUSG00000033446	lysophosphatidic acid receptor 6 [Source:MGI Symbol;Acc:MGI:1914418]
ENSMUST00000102703	301.101	0.0924025	0.12585	0.734225	0.462811	0.738151	302.852	268.353	361.923	277.468	286.905	309.105	Zfp39	ENSMUSG00000037001	zinc finger protein 39 [Source:MGI Symbol;Acc:MGI:99183]
ENSMUST00000181925	730.707	-0.0612043	0.0833843	-0.734003	0.462947	0.738151	709.051	722.559	713.176	754.366	757.336	727.756	Gm26648	ENSMUSG00000097275	predicted gene, 26648 [Source:MGI Symbol;Acc:MGI:5477142]
ENSMUST00000019722	661.907	0.0689476	0.0941164	0.732578	0.463816	0.738525	665.915	747.037	619.805	661.463	641.18	636.044	Ubxn6	ENSMUSG00000019578	UBX domain protein 6 [Source:MGI Symbol;Acc:MGI:1913780]
ENSMUST00000048603	538.507	-0.0699755	0.0957159	-0.731075	0.464733	0.739467	561.669	497.723	518.431	531.4	540.125	581.696	Dnah1	ENSMUSG00000019027	dynein, axonemal, heavy chain 1 [Source:MGI Symbol;Acc:MGI:107721]
ENSMUST00000230941	84.0321	0.153054	0.210246	0.727974	0.466629	0.741964	83.5764	115.138	66.6935	85.47	74.3398	78.9747	Gm36002	ENSMUSG00000115973	predicted gene, 36002 [Source:MGI Symbol;Acc:MGI:5595161]
ENSMUST00000114336	225.986	-0.0942946	0.129699	-0.727026	0.46721	0.742367	202.201	220.303	234.761	213.056	229.989	255.606	Tprn	ENSMUSG00000048707	taperin [Source:MGI Symbol;Acc:MGI:2139535]
ENSMUST00000049506	124.603	-0.116429	0.160287	-0.72638	0.467606	0.742476	115.03	131.457	112.045	136.256	125.448	127.379	Zrsr1	ENSMUSG00000044068	zinc finger (CCCH type), RNA binding motif and serine/arginine rich 1 [Source:MGI Symbol;Acc:MGI:98885]
ENSMUST00000008582	63.6635	0.17093	0.235998	0.724285	0.468891	0.742891	56.6163	71.6213	75.586	49.5478	48.7855	79.8239	Adam21	ENSMUSG00000008438	a disintegrin and metallopeptidase domain 21 [Source:MGI Symbol;Acc:MGI:1861229]
ENSMUST00000096314	91.0616	0.134928	0.186118	0.724961	0.468476	0.742891	102.448	95.1929	88.0354	79.2765	99.894	81.5223	Tex13a	ENSMUSG00000071686	testis expressed 13A [Source:MGI Symbol;Acc:MGI:1915194]
ENSMUST00000147006	285.531	0.0880527	0.121615	0.724028	0.469049	0.742891	259.716	320.936	301.455	298.526	262.512	270.043	Gm11683	ENSMUSG00000087139	predicted gene 11683 [Source:MGI Symbol;Acc:MGI:3651846]
ENSMUST00000194957	90.8067	-0.139827	0.193321	-0.723285	0.469505	0.742891	77.2857	105.165	77.3645	81.7539	102.217	101.054	Gm9874	ENSMUSG00000103207	predicted gene 9874 [Source:MGI Symbol;Acc:MGI:3642006]
ENSMUST00000195820	131.356	-0.115649	0.159874	-0.723375	0.469449	0.742891	127.611	116.045	133.387	151.121	139.387	120.585	Gm37814	ENSMUSG00000102816	predicted gene, 37814 [Source:MGI Symbol;Acc:MGI:5611042]
ENSMUST00000147536	86.4426	0.14352	0.199072	0.720945	0.470943	0.743406	86.2724	97.9127	88.9247	89.1861	60.4011	95.9585	Pgap2	ENSMUSG00000030990	post-GPI attachment to proteins 2 [Source:MGI Symbol;Acc:MGI:2385286]
ENSMUST00000190330	708.656	0.0725341	0.100568	0.721247	0.470757	0.743406	790.83	663.63	727.404	608.199	712.035	749.835	1700001J11Rik	ENSMUSG00000101963	RIKEN cDNA 1700001J11 gene [Source:MGI Symbol;Acc:MGI:1919474]
ENSMUST00000200320	420.819	-0.0773098	0.10715	-0.72151	0.470596	0.743406	359.468	421.568	447.291	433.543	436.746	426.294	Gm19710	ENSMUSG00000105552	predicted gene, 19710 [Source:MGI Symbol;Acc:MGI:5011895]
ENSMUST00000204297	316.293	-0.0792835	0.11002	-0.720625	0.47114	0.743406	310.041	295.551	317.461	310.913	336.852	326.938	5730507A11Rik	ENSMUSG00000107468	RIKEN cDNA 5730507A11 gene [Source:MGI Symbol;Acc:MGI:1917874]
ENSMUST00000111171	228.454	0.0957185	0.133066	0.719332	0.471936	0.744144	210.289	247.501	250.768	237.83	191.657	232.678	Pom121	ENSMUSG00000053293	nuclear pore membrane protein 121 [Source:MGI Symbol;Acc:MGI:2137624]
ENSMUST00000205766	86.4201	0.138755	0.193218	0.718126	0.47268	0.744799	77.2857	87.9401	106.71	82.9926	77.8244	85.7683	Olfr188-ps1	ENSMUSG00000108662	olfactory receptor 188, pseudogene 1 [Source:MGI Symbol;Acc:MGI:3030022]
ENSMUST00000152925	78.5756	0.154517	0.215438	0.717219	0.473239	0.744969	64.7043	76.1543	106.71	78.0378	81.3091	64.5385	Gm11651	ENSMUSG00000085297	predicted gene 11651 [Source:MGI Symbol;Acc:MGI:3651203]
ENSMUST00000157723	128.95	-0.117079	0.163316	-0.716886	0.473444	0.744969	131.206	132.363	106.71	149.882	131.256	122.283	Gm23865	ENSMUSG00000088348	predicted gene, 23865 [Source:MGI Symbol;Acc:MGI:5453642]
ENSMUST00000018884	2496.93	-0.0569254	0.0797319	-0.713961	0.475251	0.745485	2483.93	2641.83	2216	2603.74	2584.47	2451.61	Slc25a35	ENSMUSG00000018740	solute carrier family 25, member 35 [Source:MGI Symbol;Acc:MGI:1919248]
ENSMUST00000053686	75.3751	0.146018	0.20433	0.714621	0.474843	0.745485	83.5764	73.4345	80.9215	79.2765	56.9164	78.1255	Uck2	ENSMUSG00000026558	uridine-cytidine kinase 2 [Source:MGI Symbol;Acc:MGI:1931744]
ENSMUST00000181850	367.554	0.0751738	0.105379	0.713365	0.47562	0.745485	368.455	385.304	376.151	369.131	371.699	334.581	9330151L19Rik	ENSMUSG00000097061	RIKEN cDNA 9330151L19 gene [Source:MGI Symbol;Acc:MGI:3041168]
ENSMUST00000188624	85.2705	-0.135092	0.189427	-0.713165	0.475744	0.745485	81.779	74.3411	87.1462	90.4248	96.4094	81.5223	Gm28802	ENSMUSG00000099719	predicted gene 28802 [Source:MGI Symbol;Acc:MGI:5579508]
ENSMUST00000208484	293.447	0.0849737	0.118788	0.71534	0.474399	0.745485	305.548	301.897	297.008	284.9	318.267	253.059	D7Bwg0826e	ENSMUSG00000109198	DNA segment, Chr 7, Brigham & Women's Genetics 0826 expressed [Source:MGI Symbol;Acc:MGI:106455]
ENSMUST00000221240	95.3091	-0.126993	0.17776	-0.714407	0.474975	0.745485	87.1711	93.3797	92.4817	100.334	103.379	95.1094	Kcnk10	ENSMUSG00000033854	potassium channel, subfamily K, member 10 [Source:MGI Symbol;Acc:MGI:1919508]
ENSMUST00000113460	62.7348	-0.169224	0.237855	-0.71146	0.476799	0.746108	62.907	56.2091	59.5795	55.7413	51.1086	90.8634	Nr2c2	ENSMUSG00000005893	nuclear receptor subfamily 2, group C, member 2 [Source:MGI Symbol;Acc:MGI:1352466]
ENSMUST00000121388	181.788	0.100954	0.141814	0.711875	0.476542	0.746108	171.646	210.331	181.406	188.282	177.718	161.346	Olfr1397-ps1	ENSMUSG00000081016	olfactory receptor 1397, pseudogene 1 [Source:MGI Symbol;Acc:MGI:3031231]
ENSMUST00000106992	66.636	0.151716	0.214097	0.708632	0.478553	0.747714	62.907	73.4345	73.8075	73.083	54.5933	61.9909	Mapt	ENSMUSG00000018411	microtubule-associated protein tau [Source:MGI Symbol;Acc:MGI:97180]
ENSMUST00000137907	71.8667	-0.142578	0.201321	-0.708212	0.478814	0.747714	70.0963	67.9949	66.6935	75.5604	77.8244	73.0304	Cep112os1	ENSMUSG00000086761	centrosomal protein 112, opposite strand 1 [Source:MGI Symbol;Acc:MGI:3652256]
ENSMUST00000182010	2546.47	0.153124	0.216177	0.708325	0.478743	0.747714	3106.7	2246.55	2692.64	2082.25	2101.26	3049.44	Gm42418	ENSMUSG00000098178	predicted gene, 42418 [Source:MGI Symbol;Acc:MGI:5649005]
ENSMUST00000015011	112.572	0.117643	0.166559	0.706318	0.47999	0.748542	117.726	116.045	118.27	96.6182	113.833	112.942	Surf4	ENSMUSG00000014867	surfeit gene 4 [Source:MGI Symbol;Acc:MGI:98445]
ENSMUST00000073447	91.8842	-0.135561	0.191932	-0.706297	0.480004	0.748542	97.9551	76.1543	89.8139	87.9474	84.7938	114.641	Pcdhga3	ENSMUSG00000104346	protocadherin gamma subfamily A, 3 [Source:MGI Symbol;Acc:MGI:1935215]
ENSMUST00000033824	335.102	-0.0842417	0.119998	-0.702023	0.482665	0.749667	319.927	280.139	376.151	343.119	338.014	353.263	Lamp1	ENSMUSG00000031447	lysosomal-associated membrane protein 1 [Source:MGI Symbol;Acc:MGI:96745]
ENSMUST00000082402	313.142	-0.195668	0.27872	-0.702021	0.482666	0.749667	218.377	257.474	400.161	340.641	296.197	366.001	mt-Co1	ENSMUSG00000064351	mitochondrially encoded cytochrome c oxidase I [Source:MGI Symbol;Acc:MGI:102504]
ENSMUST00000090227	99.8944	-0.126172	0.17973	-0.702008	0.482674	0.749667	80.8804	97.9127	107.599	101.573	110.348	101.054	2022-03-06	ENSMUSG00000039100	membrane-associated ring finger (C3HC4) 6 [Source:MGI Symbol;Acc:MGI:2442773]
ENSMUST00000191453	88.7071	-0.135118	0.192272	-0.702741	0.482217	0.749667	79.9817	84.3137	88.0354	105.289	99.894	74.7288	Gm29430	ENSMUSG00000101451	predicted gene 29430 [Source:MGI Symbol;Acc:MGI:5580136]
ENSMUST00000193782	925.716	-0.073806	0.105144	-0.701955	0.482707	0.749667	1007.41	868.522	826.999	1016.97	1026.82	807.58	Gm34106	ENSMUSG00000102300	predicted gene, 34106 [Source:MGI Symbol;Acc:MGI:5593265]
ENSMUST00000214580	102.557	0.122438	0.173889	0.704117	0.48136	0.749667	103.347	108.792	109.377	95.3795	90.6016	107.847	Tmem202	ENSMUSG00000049526	transmembrane protein 202 [Source:MGI Symbol;Acc:MGI:1921143]
ENSMUST00000142815	289.005	-0.0818982	0.116778	-0.701313	0.483108	0.749776	274.095	277.419	290.784	273.752	327.56	290.423	C530005A16Rik	ENSMUSG00000085408	RIKEN cDNA C530005A16 gene [Source:MGI Symbol;Acc:MGI:3612454]
ENSMUST00000027931	161.532	-0.101591	0.145019	-0.700539	0.483591	0.74984	163.558	150.495	154.729	157.314	157.972	185.124	Nek2	ENSMUSG00000026622	NIMA (never in mitosis gene a)-related expressed kinase 2 [Source:MGI Symbol;Acc:MGI:109359]
ENSMUST00000126534	83.3971	-0.137093	0.195794	-0.700187	0.483811	0.74984	87.1711	87.0335	64.0258	85.47	91.7631	84.9191	Ucp2	ENSMUSG00000033685	uncoupling protein 2 (mitochondrial, proton carrier) [Source:MGI Symbol;Acc:MGI:109354]
ENSMUST00000208658	162.844	-0.109569	0.156637	-0.699512	0.484232	0.749981	146.483	191.292	132.498	175.895	156.81	174.084	Iqck	ENSMUSG00000073856	IQ motif containing K [Source:MGI Symbol;Acc:MGI:3612188]
ENSMUST00000197165	128.346	-0.11925	0.17114	-0.696796	0.48593	0.752098	113.233	129.644	124.495	144.927	153.326	104.45	Gm42721	ENSMUSG00000104592	predicted gene 42721 [Source:MGI Symbol;Acc:MGI:5662858]
ENSMUST00000020909	241.335	0.101353	0.145794	0.69518	0.486942	0.752303	264.209	228.463	259.66	208.101	196.303	291.272	Laptm4a	ENSMUSG00000020585	lysosomal-associated protein transmembrane 4A [Source:MGI Symbol;Acc:MGI:108017]
ENSMUST00000188846	1137.76	-0.0586807	0.0843074	-0.696032	0.486409	0.752303	1188.94	1132.34	1020.86	1199.06	1184.79	1100.55	Gm10550	ENSMUSG00000101952	predicted gene 10550 [Source:MGI Symbol;Acc:MGI:3704193]
ENSMUST00000220613	1265.63	-0.0560552	0.0806554	-0.694996	0.487058	0.752303	1200.62	1287.37	1232.5	1389.82	1274.23	1209.25	Gm17611	ENSMUSG00000090497	predicted gene, 17611 [Source:MGI Symbol;Acc:MGI:4937245]
ENSMUST00000026672	267.896	0.0838016	0.121047	0.692307	0.488745	0.754396	302.852	260.194	264.106	272.513	242.766	264.947	Pde8a	ENSMUSG00000025584	phosphodiesterase 8A [Source:MGI Symbol;Acc:MGI:1277116]
ENSMUST00000033929	165.79	0.111426	0.161589	0.689564	0.490468	0.756027	195.012	151.402	171.625	164.746	124.287	187.671	Tnks	ENSMUSG00000031529	tankyrase, TRF1-interacting ankyrin-related ADP-ribose polymerase [Source:MGI Symbol;Acc:MGI:1341087]
ENSMUST00000151136	7893.87	0.0543678	0.0788364	0.689629	0.490428	0.756027	8139.26	8512.96	7473.23	8008.17	7952.03	7277.56	Gm10501	ENSMUSG00000073415	predicted gene 10501 [Source:MGI Symbol;Acc:MGI:3704476]
ENSMUST00000204334	89.4317	0.132916	0.192939	0.688901	0.490886	0.756158	106.043	99.7259	75.586	80.5152	81.3091	93.411	Emg1	ENSMUSG00000004268	EMG1 N1-specific pseudouridine methyltransferase [Source:MGI Symbol;Acc:MGI:1315195]
ENSMUST00000209382	84.7996	0.151844	0.220886	0.687431	0.491811	0.757069	62.0083	98.8193	105.82	101.573	74.3398	66.2369	Csnka2ip	ENSMUSG00000068167	casein kinase 2, alpha prime interacting protein [Source:MGI Symbol;Acc:MGI:2676295]
ENSMUST00000030792	190.047	0.10456	0.15229	0.68658	0.492347	0.757381	187.822	196.732	203.637	224.204	183.526	144.362	Tas1r1	ENSMUSG00000028950	taste receptor, type 1, member 1 [Source:MGI Symbol;Acc:MGI:1927505]
ENSMUST00000091418	112.026	-0.116419	0.170643	-0.682239	0.495088	0.76005	115.03	105.165	101.374	133.779	111.51	105.3	Dnajc1	ENSMUSG00000026740	DnaJ heat shock protein family (Hsp40) member C1 [Source:MGI Symbol;Acc:MGI:103268]
ENSMUST00000181258	73.2753	-0.140711	0.206176	-0.682478	0.494937	0.76005	79.083	67.0883	62.2473	80.5152	83.6322	67.0861	Gm26811	ENSMUSG00000097816	predicted gene, 26811 [Source:MGI Symbol;Acc:MGI:5477305]
ENSMUST00000218428	107.367	0.122449	0.179273	0.683035	0.494585	0.76005	120.422	111.512	102.263	116.437	110.348	83.2207	Cog5	ENSMUSG00000035933	component of oligomeric golgi complex 5 [Source:MGI Symbol;Acc:MGI:2145130]
ENSMUST00000108267	268.123	0.0890969	0.130824	0.681043	0.495844	0.760697	279.487	320.029	230.315	252.694	257.866	268.344	Lrriq4	ENSMUSG00000027703	leucine-rich repeats and IQ motif containing 4 [Source:MGI Symbol;Acc:MGI:1915557]
ENSMUST00000133010	260.309	0.0888583	0.130911	0.678772	0.497283	0.761873	266.007	256.567	283.67	204.385	284.582	266.646	Dpy19l2	ENSMUSG00000085576	dpy-19-like 2 (C. elegans) [Source:MGI Symbol;Acc:MGI:2444662]
ENSMUST00000166971	72.0946	-0.157846	0.232405	-0.679187	0.497019	0.761873	81.779	60.7421	60.4688	89.1861	89.44	50.9514	6530401F13Rik	ENSMUSG00000091947	RIKEN cDNA 6530401F13 gene [Source:MGI Symbol;Acc:MGI:1923491]
ENSMUST00000035622	105.409	0.123469	0.182474	0.67664	0.498635	0.762818	121.321	90.6599	118.27	84.2313	112.671	105.3	Wdr93	ENSMUSG00000039099	WD repeat domain 93 [Source:MGI Symbol;Acc:MGI:3646885]
ENSMUST00000194155	77.5152	-0.137025	0.202515	-0.676617	0.498649	0.762818	74.5897	86.1269	61.358	78.0378	76.6629	88.3158	Gm37759	ENSMUSG00000102717	predicted gene, 37759 [Source:MGI Symbol;Acc:MGI:5610987]
ENSMUST00000218108	848.283	-0.0705016	0.10426	-0.676209	0.498908	0.762818	922.935	871.241	687.388	888.145	901.37	818.62	4930455C13Rik	ENSMUSG00000112654	RIKEN cDNA 4930455C13 gene [Source:MGI Symbol;Acc:MGI:1921240]
ENSMUST00000140826	142.216	0.104242	0.154379	0.675232	0.499528	0.763252	155.47	137.803	147.615	139.973	151.003	121.434	Gm12462	ENSMUSG00000086211	predicted gene 12462 [Source:MGI Symbol;Acc:MGI:3650646]
ENSMUST00000096452	66.0324	0.162843	0.242617	0.671197	0.502095	0.765428	65.603	62.5553	82.6999	55.7413	42.9777	86.6174	BC005561	ENSMUSG00000079065	cDNA sequence BC005561 [Source:MGI Symbol;Acc:MGI:3040669]
ENSMUST00000198477	2086.77	0.217039	0.323517	0.670873	0.502302	0.765428	2749.03	2329.96	1652.22	1422.02	1806.22	2561.16	CT010467.1	ENSMUSG00000106106	18s RNA, related sequence 5
ENSMUST00000208659	119.987	0.11488	0.170972	0.671919	0.501635	0.765428	132.105	130.55	112.045	94.1409	134.741	116.339	Spred3	ENSMUSG00000037239	sprouty-related EVH1 domain containing 3 [Source:MGI Symbol;Acc:MGI:2142186]
ENSMUST00000212638	166.768	0.0974985	0.145282	0.6711	0.502157	0.765428	193.214	165.908	157.397	170.94	160.295	152.854	4930488L21Rik	ENSMUSG00000097520	RIKEN cDNA 4930488L21 gene [Source:MGI Symbol;Acc:MGI:1923059]
ENSMUST00000025861	661.83	-0.0603882	0.0901333	-0.669987	0.502866	0.765571	616.488	701.707	626.03	666.418	681.835	678.503	Ovol1	ENSMUSG00000024922	ovo like zinc finger 1 [Source:MGI Symbol;Acc:MGI:1330290]
ENSMUST00000028761	62.0951	0.150789	0.22517	0.669667	0.50307	0.765571	63.8056	54.3959	78.2537	52.0252	60.4011	63.6893	Ubox5	ENSMUSG00000027300	U box domain containing 5 [Source:MGI Symbol;Acc:MGI:2154658]
ENSMUST00000082337	155.628	-0.10448	0.156398	-0.66804	0.504108	0.766636	162.659	126.017	161.843	170.94	138.225	174.084	Mdc1	ENSMUSG00000061607	mediator of DNA damage checkpoint 1 [Source:MGI Symbol;Acc:MGI:3525201]
ENSMUST00000022766	77.0642	-0.144019	0.216565	-0.665015	0.506041	0.76906	55.7176	80.6873	83.5892	91.6635	61.5626	89.165	Tox4	ENSMUSG00000016831	TOX high mobility group box family member 4 [Source:MGI Symbol;Acc:MGI:1915389]
ENSMUST00000050129	62.2739	0.156261	0.237321	0.658439	0.510256	0.77339	70.0963	48.0497	79.143	45.8317	68.532	61.9909	Cox7b2	ENSMUSG00000049387	cytochrome c oxidase subunit 7B2 [Source:MGI Symbol;Acc:MGI:1925424]
ENSMUST00000118014	96.7771	-0.119231	0.18131	-0.65761	0.510789	0.77339	101.55	94.2863	81.8107	105.289	106.863	90.8634	Gm12392	ENSMUSG00000083005	predicted gene 12392 [Source:MGI Symbol;Acc:MGI:3651008]
ENSMUST00000118771	860.5	-0.0600721	0.0913807	-0.657383	0.510935	0.77339	903.164	850.39	771.866	932.738	895.562	809.279	Wdr61	ENSMUSG00000061559	WD repeat domain 61 [Source:MGI Symbol;Acc:MGI:1917493]
ENSMUST00000124643	156.224	-0.0996733	0.151295	-0.658803	0.510022	0.77339	162.659	162.281	127.162	172.179	156.81	156.251	4931431C16Rik	ENSMUSG00000055061	RIKEN cDNA 4931431C16 gene [Source:MGI Symbol;Acc:MGI:1921614]
ENSMUST00000188710	79.1912	0.134763	0.204933	0.657597	0.510797	0.77339	69.1976	84.3137	96.0386	73.083	65.0473	87.4666	Clasp1	ENSMUSG00000064302	CLIP associating protein 1 [Source:MGI Symbol;Acc:MGI:1923957]
ENSMUST00000229080	175.522	-0.091519	0.138731	-0.659687	0.509455	0.77339	159.065	180.413	169.846	182.088	189.334	172.386	Gm49475	ENSMUSG00000116366	predicted gene, 49475 [Source:MGI Symbol;Acc:MGI:6155143]
ENSMUST00000029374	76.0487	0.133381	0.203101	0.656725	0.511358	0.773469	86.2724	77.9675	75.586	65.6509	65.0473	85.7683	Nbea	ENSMUSG00000027799	neurobeachin [Source:MGI Symbol;Acc:MGI:1347075]
ENSMUST00000032168	123.246	0.10598	0.161496	0.656242	0.511669	0.773469	134.801	116.045	132.498	111.483	126.61	118.038	Sec61a1	ENSMUSG00000030082	Sec61 alpha 1 subunit (S. cerevisiae) [Source:MGI Symbol;Acc:MGI:1858417]
ENSMUST00000045807	211.187	-0.0846663	0.130087	-0.650842	0.515148	0.776143	202.201	202.172	211.641	194.475	226.504	230.131	Tsr1	ENSMUSG00000038335	TSR1 20S rRNA accumulation [Source:MGI Symbol;Acc:MGI:2144566]
ENSMUST00000097921	85.3194	0.12485	0.191749	0.651109	0.514976	0.776143	98.8538	80.6873	88.0354	70.6056	87.1169	86.6174	Cdkn2c	ENSMUSG00000028551	cyclin dependent kinase inhibitor 2C [Source:MGI Symbol;Acc:MGI:105388]
ENSMUST00000103242	498.158	0.0679646	0.104187	0.652331	0.514188	0.776143	547.29	524.014	460.63	455.84	470.431	530.744	Tmem97	ENSMUSG00000037278	transmembrane protein 97 [Source:MGI Symbol;Acc:MGI:1916321]
ENSMUST00000117584	82.7217	0.129417	0.19841	0.652273	0.514225	0.776143	99.7525	80.6873	78.2537	92.9022	70.8551	73.8796	Pom121l12	ENSMUSG00000084135	POM121 membrane glycoprotein-like 12 [Source:MGI Symbol;Acc:MGI:1920677]
ENSMUST00000207816	474.488	-0.0678958	0.104204	-0.651567	0.514681	0.776143	412.49	495.91	481.972	505.388	451.846	499.324	Gm44560	ENSMUSG00000108880	predicted gene 44560 [Source:MGI Symbol;Acc:MGI:5753136]
ENSMUST00000228236	137.86	-0.104944	0.161431	-0.650086	0.515637	0.776363	141.99	146.869	109.377	156.076	133.579	139.267	Gm48960	ENSMUSG00000115829	predicted gene, 48960 [Source:MGI Symbol;Acc:MGI:6118292]
ENSMUST00000147403	547.279	0.0591911	0.0911295	0.649527	0.515998	0.776392	557.176	571.157	546.887	552.458	522.701	533.292	Cnp	ENSMUSG00000006782	2',3'-cyclic nucleotide 3' phosphodiesterase [Source:MGI Symbol;Acc:MGI:88437]
ENSMUST00000094245	385.447	0.0745566	0.115059	0.647984	0.516995	0.777377	393.618	447.86	344.138	369.131	399.576	358.358	Cldn3	ENSMUSG00000070473	claudin 3 [Source:MGI Symbol;Acc:MGI:1329044]
ENSMUST00000045866	74.1281	0.131792	0.203656	0.647128	0.517549	0.777694	76.387	72.5279	84.4784	60.6961	70.8551	79.8239	Ddx21	ENSMUSG00000020075	DEAD (Asp-Glu-Ala-Asp) box polypeptide 21 [Source:MGI Symbol;Acc:MGI:1860494]
ENSMUST00000165706	142.333	0.0975696	0.151119	0.645648	0.518508	0.778619	140.193	155.935	144.947	133.779	147.518	131.625	Pla2g7	ENSMUSG00000023913	phospholipase A2, group VII (platelet-activating factor acetylhydrolase, plasma) [Source:MGI Symbol;Acc:MGI:1351327]
ENSMUST00000201177	65.2713	0.15625	0.242755	0.643656	0.519799	0.780042	61.1096	88.8467	56.0225	81.7539	45.3008	58.5942	4930566F21Rik	ENSMUSG00000107142	RIKEN cDNA 4930566F21 gene [Source:MGI Symbol;Acc:MGI:1923094]
ENSMUST00000031740	110.687	0.118692	0.185103	0.641222	0.521378	0.781895	139.294	87.9401	119.159	100.334	101.056	116.339	Mepce	ENSMUSG00000029726	methylphosphate capping enzyme [Source:MGI Symbol;Acc:MGI:106477]
ENSMUST00000165133	234.806	0.0809782	0.126595	0.639665	0.52239	0.782895	226.465	232.996	264.996	236.591	212.565	235.226	Spata31d1b	ENSMUSG00000091311	spermatogenesis associated 31 subfamily D, member 1B [Source:MGI Symbol;Acc:MGI:3646080]
ENSMUST00000126668	125.511	-0.103247	0.161785	-0.638174	0.523361	0.783315	126.713	125.111	110.267	138.734	135.902	116.339	Gm12743	ENSMUSG00000084968	predicted gene 12743 [Source:MGI Symbol;Acc:MGI:3651449]
ENSMUST00000146003	76.0866	-0.133496	0.209057	-0.638561	0.523108	0.783315	76.387	65.2751	77.3645	63.1735	76.6629	97.6569	Mrpl48	ENSMUSG00000030706	mitochondrial ribosomal protein L48 [Source:MGI Symbol;Acc:MGI:1289321]
ENSMUST00000218768	126.206	-0.101536	0.159253	-0.637579	0.523748	0.783378	131.206	121.484	112.934	133.779	121.964	135.871	Gm49167	ENSMUSG00000112203	predicted gene, 49167 [Source:MGI Symbol;Acc:MGI:6118596]
ENSMUST00000110617	233.592	0.0844893	0.13286	0.635928	0.524824	0.783392	255.222	205.798	261.439	211.817	221.858	245.416	Cplane1	ENSMUSG00000039801	ciliogenesis and planar polarity effector 1 [Source:MGI Symbol;Acc:MGI:1920942]
ENSMUST00000138207	64.305	-0.139594	0.219565	-0.635773	0.524925	0.783392	55.7176	73.4345	54.244	74.3217	62.7242	65.3877	Gm15964	ENSMUSG00000085337	predicted gene 15964 [Source:MGI Symbol;Acc:MGI:3802003]
ENSMUST00000168470	127.732	0.103238	0.162466	0.635444	0.525139	0.783392	113.233	146.869	136.944	126.347	117.317	125.68	Gm17233	ENSMUSG00000090706	predicted gene 17233 [Source:MGI Symbol;Acc:MGI:4938060]
ENSMUST00000180877	92.2458	-0.127225	0.200111	-0.635772	0.524925	0.783392	115.03	75.2477	73.8075	105.289	94.0863	90.0142	A530083I20Rik	ENSMUSG00000097322	RIKEN cDNA A530083I20 gene [Source:MGI Symbol;Acc:MGI:3040711]
ENSMUST00000018569	162.277	-0.0934863	0.148623	-0.629018	0.529337	0.787373	135.699	156.842	178.739	169.701	160.295	172.386	Dhx40	ENSMUSG00000018425	DEAH (Asp-Glu-Ala-His) box polypeptide 40 [Source:MGI Symbol;Acc:MGI:1914737]
ENSMUST00000160445	235.404	-0.0790826	0.125999	-0.627645	0.530236	0.787373	214.782	238.435	233.872	220.488	263.674	241.17	Gm16549	ENSMUSG00000090216	predicted gene 16549 [Source:MGI Symbol;Acc:MGI:4414969]
ENSMUST00000181385	105.236	0.117512	0.186516	0.63004	0.528668	0.787373	86.2724	116.045	127.162	97.8569	89.44	114.641	Gm26781	ENSMUSG00000097433	predicted gene, 26781 [Source:MGI Symbol;Acc:MGI:5477275]
ENSMUST00000191892	152.495	0.0984953	0.156227	0.630463	0.528391	0.787373	143.787	182.226	145.836	161.03	152.164	129.926	4932442E05Rik	ENSMUSG00000104443	RIKEN cDNA 4932442E05 gene [Source:MGI Symbol;Acc:MGI:1921665]
ENSMUST00000206152	132.863	0.0981796	0.156209	0.628516	0.529666	0.787373	140.193	143.243	128.052	139.973	124.287	121.434	4930517G19Rik	ENSMUSG00000108784	RIKEN cDNA 4930517G19 gene [Source:MGI Symbol;Acc:MGI:1921977]
ENSMUST00000211023	67.9485	0.136259	0.217064	0.627738	0.530175	0.787373	65.603	75.2477	73.8075	49.5478	66.2088	77.2764	Gm45261	ENSMUSG00000110100	predicted gene 45261 [Source:MGI Symbol;Acc:MGI:5791097]
ENSMUST00000216414	69.3699	-0.128849	0.205103	-0.628219	0.52986	0.787373	65.603	65.2751	67.5828	74.3217	75.5013	67.9353	Gm19936	ENSMUSG00000110930	predicted gene, 19936 [Source:MGI Symbol;Acc:MGI:5012121]
ENSMUST00000227861	500.182	0.059684	0.0952115	0.626856	0.530753	0.787626	519.432	510.415	500.646	484.33	519.217	467.055	Gm10389	ENSMUSG00000115667	predicted gene 10389 [Source:MGI Symbol;Acc:MGI:3641773]
ENSMUST00000041524	105.603	-0.106695	0.171463	-0.622264	0.533768	0.790548	105.144	107.885	92.4817	107.767	105.702	114.641	Trmt13	ENSMUSG00000033439	tRNA methyltransferase 13 [Source:MGI Symbol;Acc:MGI:1925219]
ENSMUST00000147835	123.136	0.106922	0.171665	0.622855	0.53338	0.790548	149.179	110.605	124.495	101.573	119.641	133.323	Rasl2-9	ENSMUSG00000083649	RAS-like, family 2, locus 9 [Source:MGI Symbol;Acc:MGI:104605]
ENSMUST00000163050	129.735	0.103574	0.166307	0.622789	0.533423	0.790548	130.307	157.748	114.713	121.392	137.064	117.188	Rnf32	ENSMUSG00000029130	ring finger protein 32 [Source:MGI Symbol;Acc:MGI:1861747]
ENSMUST00000193450	135.389	0.0980244	0.15851	0.61841	0.536305	0.793788	155.47	127.83	136.055	126.347	145.195	121.434	Gm37587	ENSMUSG00000104238	predicted gene, 37587 [Source:MGI Symbol;Acc:MGI:5610815]
ENSMUST00000059438	254.87	-0.0789903	0.128111	-0.616579	0.537512	0.794447	216.58	281.046	246.321	245.262	277.613	262.4	2310057M21Rik	ENSMUSG00000040177	RIKEN cDNA 2310057M21 gene [Source:MGI Symbol;Acc:MGI:1915527]
ENSMUST00000105383	236.556	0.077668	0.126056	0.616141	0.537801	0.794447	248.932	242.968	236.54	255.171	205.596	230.131	Ccdc105	ENSMUSG00000078442	coiled-coil domain containing 105 [Source:MGI Symbol;Acc:MGI:1918226]
ENSMUST00000213408	248.564	-0.0753045	0.122054	-0.616976	0.537251	0.794447	258.817	243.875	223.201	252.694	264.835	247.964	Ulk4	ENSMUSG00000040936	unc-51-like kinase 4 [Source:MGI Symbol;Acc:MGI:1921622]
ENSMUST00000189749	338.845	0.0785933	0.127718	0.615367	0.538312	0.794685	350.482	286.485	408.164	324.538	310.136	353.263	Dnah7c	ENSMUSG00000101337	dynein, axonemal, heavy chain 7C [Source:MGI Symbol;Acc:MGI:3639762]
ENSMUST00000020383	116.27	-0.101033	0.164785	-0.613118	0.539798	0.79636	106.942	114.231	115.602	109.005	131.256	120.585	Atp8b3	ENSMUSG00000003341	ATPase, class I, type 8B, member 3 [Source:MGI Symbol;Acc:MGI:1914581]
ENSMUST00000025893	98.5248	0.107422	0.175694	0.611419	0.540922	0.7975	96.1578	105.165	104.931	99.0956	94.0863	91.7126	Arl2	ENSMUSG00000024944	ADP-ribosylation factor-like 2 [Source:MGI Symbol;Acc:MGI:1928393]
ENSMUST00000098906	65.3849	-0.13189	0.216095	-0.610332	0.541642	0.798043	70.995	55.3025	60.4688	66.8896	76.6629	61.9909	Pate2	ENSMUSG00000074452	prostate and testis expressed 2 [Source:MGI Symbol;Acc:MGI:2685692]
ENSMUST00000201917	134.819	0.107068	0.175726	0.609289	0.542333	0.798542	133.003	169.534	115.602	136.256	147.518	106.998	Agbl5	ENSMUSG00000029165	ATP/GTP binding protein-like 5 [Source:MGI Symbol;Acc:MGI:2441745]
ENSMUST00000022311	156.665	0.0917934	0.151273	0.606806	0.54398	0.799982	170.747	155.028	159.175	172.179	126.61	156.251	Oxsm	ENSMUSG00000021786	3-oxoacyl-ACP synthase, mitochondrial [Source:MGI Symbol;Acc:MGI:1918397]
ENSMUST00000094698	82.5376	0.1214	0.200082	0.606752	0.544016	0.799982	82.6777	86.1269	90.7032	61.9348	77.8244	95.9585	Rbm44	ENSMUSG00000070732	RNA binding motif protein 44 [Source:MGI Symbol;Acc:MGI:2685663]
ENSMUST00000055984	101.028	0.108441	0.179317	0.604743	0.54535	0.800419	113.233	97.9127	104.042	80.5152	106.863	103.601	Isg20l2	ENSMUSG00000048039	interferon stimulated exonuclease gene 20-like 2 [Source:MGI Symbol;Acc:MGI:2140076]
ENSMUST00000102821	170.218	-0.0840293	0.13908	-0.60418	0.545724	0.800419	159.065	161.375	175.182	175.895	176.557	173.235	Stk10	ENSMUSG00000020272	serine/threonine kinase 10 [Source:MGI Symbol;Acc:MGI:1099439]
ENSMUST00000123179	151.831	0.0913377	0.150798	0.605696	0.544716	0.800419	146.483	173.16	149.393	148.643	159.134	134.172	Gm12666	ENSMUSG00000066107	predicted gene 12666 [Source:MGI Symbol;Acc:MGI:3650864]
ENSMUST00000128542	166.038	-0.0877013	0.145134	-0.60428	0.545657	0.800419	144.686	176.787	161.843	157.314	182.365	173.235	4930481A15Rik	ENSMUSG00000086938	RIKEN cDNA 4930481A15 gene [Source:MGI Symbol;Acc:MGI:1922181]
ENSMUST00000092143	71.9853	0.131709	0.218461	0.602897	0.546577	0.800608	74.5897	85.2203	66.6935	76.7991	48.7855	79.8239	Msrb3	ENSMUSG00000051236	methionine sulfoxide reductase B3 [Source:MGI Symbol;Acc:MGI:2443538]
ENSMUST00000097493	71.3766	0.130237	0.216198	0.602395	0.546911	0.800608	77.2857	66.1817	79.143	69.3669	83.6322	52.6498	BC055324	ENSMUSG00000041406	cDNA sequence BC055324 [Source:MGI Symbol;Acc:MGI:3590554]
ENSMUST00000192833	13912.8	0.103038	0.17094	0.602774	0.546659	0.800608	17372.2	12679.7	13177.7	12022.8	12950.2	15274.4	Gm26917	ENSMUSG00000097971	predicted gene, 26917 [Source:MGI Symbol;Acc:MGI:5504032]
ENSMUST00000081291	89.3904	0.111205	0.185053	0.600938	0.547882	0.801349	86.2724	89.7533	102.263	84.2313	90.6016	83.2207	Cyhr1	ENSMUSG00000053929	cysteine and histidine rich 1 [Source:MGI Symbol;Acc:MGI:1859320]
ENSMUST00000124047	240.27	-0.0802116	0.133558	-0.600573	0.548124	0.801349	255.222	235.716	208.084	257.649	271.805	213.147	Gm12224	ENSMUSG00000085888	predicted gene 12224 [Source:MGI Symbol;Acc:MGI:3651369]
ENSMUST00000194870	65.4174	-0.1322	0.220415	-0.599778	0.548654	0.801608	61.1096	75.2477	51.5763	61.9348	66.2088	76.4272	Gm6162	ENSMUSG00000103733	predicted gene 6162 [Source:MGI Symbol;Acc:MGI:3647648]
ENSMUST00000192265	87.2396	-0.117744	0.196886	-0.59803	0.54982	0.802793	91.6644	80.6873	80.0322	85.47	74.3398	111.244	Gm37415	ENSMUSG00000103864	predicted gene, 37415 [Source:MGI Symbol;Acc:MGI:5610643]
ENSMUST00000028256	235.828	0.0803082	0.134734	0.59605	0.551142	0.803589	265.108	235.716	228.536	218.01	200.95	266.646	Morn5	ENSMUSG00000026894	MORN repeat containing 5 [Source:MGI Symbol;Acc:MGI:1922745]
ENSMUST00000057717	222.727	-0.0759842	0.12742	-0.596329	0.550956	0.803589	220.174	219.397	212.53	213.056	220.696	250.511	Zfp319	ENSMUSG00000046556	zinc finger protein 319 [Source:MGI Symbol;Acc:MGI:1890618]
ENSMUST00000203740	85.9376	-0.117967	0.198056	-0.595623	0.551427	0.803589	68.299	81.5939	96.9279	104.05	78.986	85.7683	Gm43959	ENSMUSG00000107769	predicted gene, 43959 [Source:MGI Symbol;Acc:MGI:5690351]
ENSMUST00000067744	804.707	-0.0561994	0.0944425	-0.595065	0.5518	0.803616	809.702	831.351	723.847	821.255	899.046	743.042	Cggbp1	ENSMUSG00000054604	CGG triplet repeat binding protein 1 [Source:MGI Symbol;Acc:MGI:2146370]
ENSMUST00000039535	740.133	0.0539969	0.0910041	0.593345	0.55295	0.803744	711.747	802.34	746.078	787.81	701.581	691.241	Wdr38	ENSMUSG00000035295	WD repeat domain 38 [Source:MGI Symbol;Acc:MGI:1923896]
ENSMUST00000071067	180.228	0.0828946	0.139523	0.59413	0.552425	0.803744	179.734	190.386	185.853	159.792	197.465	168.14	C330011M18Rik	ENSMUSG00000056753	RIKEN cDNA C330011M18 gene [Source:MGI Symbol;Acc:MGI:3045248]
ENSMUST00000092096	160.498	-0.0890382	0.14996	-0.593747	0.552682	0.803744	141.99	172.254	153.84	153.598	154.487	186.822	Usp14	ENSMUSG00000047879	ubiquitin specific peptidase 14 [Source:MGI Symbol;Acc:MGI:1928898]
ENSMUST00000132432	224.881	-0.0758843	0.128224	-0.591813	0.553976	0.804213	204.897	242.062	209.862	222.965	242.766	226.734	Gm16731	ENSMUSG00000085990	predicted gene, 16731 [Source:MGI Symbol;Acc:MGI:4439655]
ENSMUST00000156905	145.09	0.0901116	0.152266	0.591804	0.553982	0.804213	162.659	150.495	136.055	128.824	149.841	142.664	Gm10244	ENSMUSG00000068601	predicted gene 10244 [Source:MGI Symbol;Acc:MGI:3642504]
ENSMUST00000206944	134.119	-0.0952857	0.161239	-0.590959	0.554548	0.80452	108.739	148.682	131.609	143.689	133.579	138.418	Gm44672	ENSMUSG00000108720	predicted gene 44672 [Source:MGI Symbol;Acc:MGI:5753248]
ENSMUST00000154924	75.7546	-0.118749	0.201653	-0.588881	0.555941	0.806026	65.603	84.3137	68.472	73.083	78.986	84.0699	Pnpt1	ENSMUSG00000020464	polyribonucleotide nucleotidyltransferase 1 [Source:MGI Symbol;Acc:MGI:1918951]
ENSMUST00000023089	69.2137	0.125972	0.214311	0.587801	0.556666	0.806561	70.0963	62.5553	84.4784	69.3669	55.7548	73.0304	Wbp2nl	ENSMUSG00000022455	WBP2 N-terminal like [Source:MGI Symbol;Acc:MGI:1921966]
ENSMUST00000141713	229.586	0.0780124	0.133265	0.585395	0.558282	0.807872	248.033	210.331	250.768	210.578	205.596	252.21	4932431P20Rik	ENSMUSG00000074224	RIKEN cDNA 4932431P20 gene [Source:MGI Symbol;Acc:MGI:2149781]
ENSMUST00000186812	117.325	-0.0976134	0.166666	-0.585681	0.55809	0.807872	127.611	98.8193	113.824	118.915	120.802	123.982	Gm21136	ENSMUSG00000099981	predicted gene, 21136 [Source:MGI Symbol;Acc:MGI:5434491]
ENSMUST00000091701	67.75	0.123246	0.211026	0.584029	0.559201	0.80817	74.5897	77.0609	60.4688	61.9348	66.2088	66.2369	Hist1h3a	ENSMUSG00000069265	histone cluster 1, H3a [Source:MGI Symbol;Acc:MGI:2668828]
ENSMUST00000148729	81.1507	-0.204341	0.349754	-0.584243	0.559057	0.80817	65.603	58.0223	103.153	79.2765	66.2088	114.641	Wbscr25	ENSMUSG00000054909	Williams Beuren syndrome chromosome region 25 (human) [Source:MGI Symbol;Acc:MGI:1918554]
ENSMUST00000113270	128.58	-0.0945055	0.162465	-0.581698	0.56077	0.809922	135.699	122.391	113.824	146.166	137.064	116.339	Alpi	ENSMUSG00000079440	alkaline phosphatase, intestinal [Source:MGI Symbol;Acc:MGI:1924018]
ENSMUST00000219443	94.6694	0.111105	0.191233	0.580991	0.561246	0.810094	79.9817	115.138	99.5956	82.9926	104.54	85.7683	Arhgap5	ENSMUSG00000035133	Rho GTPase activating protein 5 [Source:MGI Symbol;Acc:MGI:1332637]
ENSMUST00000144623	71.2286	-0.127416	0.22007	-0.57898	0.562603	0.810636	78.1844	76.1543	49.7978	85.47	63.8857	73.8796	Gpat3	ENSMUSG00000029314	glycerol-3-phosphate acyltransferase 3 [Source:MGI Symbol;Acc:MGI:3603816]
ENSMUST00000206940	365.635	-0.0640015	0.110567	-0.578846	0.562693	0.810636	363.962	382.585	324.575	391.428	385.637	345.621	B3gnt8	ENSMUSG00000059479	UDP-GlcNAc:betaGal beta-1,3-N-acetylglucosaminyltransferase 8 [Source:MGI Symbol;Acc:MGI:2385269]
ENSMUST00000208291	126.462	-0.0909662	0.15701	-0.579365	0.562343	0.810636	116.827	127.83	122.716	132.54	128.933	129.926	Fuz	ENSMUSG00000011658	fuzzy planar cell polarity protein [Source:MGI Symbol;Acc:MGI:1917550]
ENSMUST00000126919	77.111	-0.12487	0.21597	-0.578182	0.563141	0.810766	79.9817	52.5827	88.0354	82.9926	89.44	69.6336	Dgcr2	ENSMUSG00000003166	DiGeorge syndrome critical region gene 2 [Source:MGI Symbol;Acc:MGI:892866]
ENSMUST00000060092	70.2372	0.122597	0.212638	0.576552	0.564242	0.811836	74.5897	58.9289	86.2569	68.1282	63.8857	69.6336	Upf2	ENSMUSG00000043241	UPF2 regulator of nonsense transcripts homolog (yeast) [Source:MGI Symbol;Acc:MGI:2449307]
ENSMUST00000001451	64.9815	0.123374	0.214858	0.574213	0.565824	0.812052	72.7923	69.8081	61.358	58.2187	58.0779	69.6336	Smg5	ENSMUSG00000001415	Smg-5 homolog, nonsense mediated mRNA decay factor (C. elegans) [Source:MGI Symbol;Acc:MGI:2447364]
ENSMUST00000040455	85.7919	0.11409	0.198534	0.574661	0.565521	0.812052	82.6777	75.2477	109.377	90.4248	75.5013	81.5223	Hif1an	ENSMUSG00000036450	hypoxia-inducible factor 1, alpha subunit inhibitor [Source:MGI Symbol;Acc:MGI:2442345]
ENSMUST00000084640	86.0311	0.114344	0.19892	0.574826	0.565409	0.812052	97.9551	87.0335	84.4784	60.6961	91.7631	94.2602	Abca14	ENSMUSG00000062017	ATP-binding cassette, sub-family A (ABC1), member 14 [Source:MGI Symbol;Acc:MGI:2388708]
ENSMUST00000210638	81.2827	0.113369	0.197079	0.57525	0.565122	0.812052	93.4618	82.5005	77.3645	89.1861	66.2088	78.9747	Gm31166	ENSMUSG00000109695	predicted gene, 31166 [Source:MGI Symbol;Acc:MGI:5590325]
ENSMUST00000132253	414.961	-0.06187	0.107974	-0.573009	0.566639	0.812708	360.367	422.475	433.952	448.408	426.292	398.27	Ost4	ENSMUSG00000038803	oligosaccharyltransferase complex subunit 4 (non-catalytic) [Source:MGI Symbol;Acc:MGI:1914945]
ENSMUST00000000505	109.939	-0.098996	0.174339	-0.567837	0.570146	0.814046	101.55	96.0995	120.938	100.334	127.771	112.942	Mcm7	ENSMUSG00000029730	minichromosome maintenance complex component 7 [Source:MGI Symbol;Acc:MGI:1298398]
ENSMUST00000028346	76.7851	0.113784	0.199619	0.570008	0.568672	0.814046	83.5764	70.7147	84.4784	80.5152	74.3398	67.0861	Fam166a	ENSMUSG00000026969	family with sequence similarity 166, member A [Source:MGI Symbol;Acc:MGI:3605773]
ENSMUST00000043551	77.397	-0.120878	0.212962	-0.567605	0.570303	0.814046	58.4136	91.5665	72.9182	65.6509	91.7631	84.0699	Ankib1	ENSMUSG00000040351	ankyrin repeat and IBR domain containing 1 [Source:MGI Symbol;Acc:MGI:1918047]
ENSMUST00000063138	92.0442	0.106894	0.187612	0.569758	0.568842	0.814046	95.2591	103.352	87.1462	82.9926	104.54	78.9747	Msl3l2	ENSMUSG00000047669	MSL3 like 2 [Source:MGI Symbol;Acc:MGI:1920640]
ENSMUST00000068603	153.667	-0.0922801	0.162078	-0.569355	0.569115	0.814046	142.889	161.375	140.501	199.43	139.387	138.418	Iqgap2	ENSMUSG00000021676	IQ motif containing GTPase activating protein 2 [Source:MGI Symbol;Acc:MGI:2449975]
ENSMUST00000175690	160.891	-0.0869013	0.153013	-0.567934	0.57008	0.814046	159.963	176.787	131.609	149.882	182.365	164.743	Gm20650	ENSMUSG00000093768	predicted gene 20650 [Source:MGI Symbol;Acc:MGI:5313097]
ENSMUST00000185789	1547.91	-0.0464503	0.081433	-0.570411	0.568399	0.814046	1408.22	1656.36	1502.83	1618.97	1597.14	1503.92	Kcnq1ot1	ENSMUSG00000101609	KCNQ1 overlapping transcript 1 [Source:MGI Symbol;Acc:MGI:1926855]
ENSMUST00000185931	103.247	-0.100075	0.176375	-0.567401	0.570442	0.814046	99.7525	113.325	86.2569	104.05	105.702	110.395	1600010M07Rik	ENSMUSG00000101585	RIKEN cDNA 1600010M07 gene [Source:MGI Symbol;Acc:MGI:1917031]
ENSMUST00000088448	64.5807	0.132976	0.234793	0.566354	0.571153	0.814548	46.7309	72.5279	83.5892	53.2639	68.532	62.8401	Pkhd1	ENSMUSG00000043760	polycystic kidney and hepatic disease 1 [Source:MGI Symbol;Acc:MGI:2155808]
ENSMUST00000021239	216.711	0.0802744	0.142165	0.564656	0.572308	0.81517	200.404	202.172	265.885	189.52	229.989	212.298	Lrrc59	ENSMUSG00000020869	leucine rich repeat containing 59 [Source:MGI Symbol;Acc:MGI:2138133]
ENSMUST00000132951	62.4808	0.127129	0.225116	0.564728	0.572259	0.81517	64.7043	76.1543	54.244	69.3669	56.9164	53.499	Prpf38a	ENSMUSG00000063800	PRP38 pre-mRNA processing factor 38 (yeast) domain containing A [Source:MGI Symbol;Acc:MGI:1916962]
ENSMUST00000086887	271.029	0.0757078	0.134253	0.56392	0.572809	0.815345	270.5	317.31	244.543	287.377	282.259	224.186	Gm10197	ENSMUSG00000067085	predicted gene 10197 [Source:MGI Symbol;Acc:MGI:3704501]
ENSMUST00000131146	135.324	0.0890522	0.158057	0.56342	0.573149	0.815345	129.409	154.122	136.055	126.347	120.802	145.212	Gm16069	ENSMUSG00000086718	predicted gene 16069 [Source:MGI Symbol;Acc:MGI:3801823]
ENSMUST00000211180	1203.74	-0.0480992	0.0857468	-0.560944	0.574835	0.817232	1090.99	1309.13	1149.8	1249.84	1244.03	1178.68	Lamtor1	ENSMUSG00000030842	late endosomal/lysosomal adaptor, MAPK and MTOR activator 1 [Source:MGI Symbol;Acc:MGI:1913758]
ENSMUST00000137546	145.997	0.0941565	0.168273	0.559545	0.57579	0.817748	122.219	167.721	161.843	168.463	117.317	138.418	1700121C08Rik	ENSMUSG00000086275	RIKEN cDNA 1700121C08 gene [Source:MGI Symbol;Acc:MGI:1925891]
ENSMUST00000211328	1308.79	0.0438154	0.0783321	0.559355	0.575919	0.817748	1285.1	1383.47	1315.2	1370	1271.91	1227.08	Gm45244	ENSMUSG00000109807	predicted gene 45244 [Source:MGI Symbol;Acc:MGI:5791080]
ENSMUST00000217455	706.534	0.0570392	0.102077	0.558784	0.576309	0.817789	733.315	635.526	794.987	641.644	673.704	760.026	Gm7444	ENSMUSG00000110989	predicted gene 7444 [Source:MGI Symbol;Acc:MGI:3644944]
ENSMUST00000153737	80.0782	-0.108786	0.195006	-0.557862	0.576939	0.818171	71.8937	72.5279	87.1462	79.2765	81.3091	88.3158	Ppp2r2b	ENSMUSG00000024500	protein phosphatase 2, regulatory subunit B, beta [Source:MGI Symbol;Acc:MGI:1920180]
ENSMUST00000035112	67.7492	-0.122383	0.220256	-0.555638	0.578458	0.819302	70.0963	52.5827	72.9182	59.4574	67.3704	84.0699	Nktr	ENSMUSG00000032525	natural killer tumor recognition sequence [Source:MGI Symbol;Acc:MGI:97346]
ENSMUST00000188544	220.735	0.0756118	0.13599	0.556011	0.578203	0.819302	220.174	203.078	255.214	209.34	240.443	196.163	Gm28178	ENSMUSG00000099878	predicted gene 28178 [Source:MGI Symbol;Acc:MGI:5578884]
ENSMUST00000017975	134.042	0.0867313	0.156942	0.552632	0.580515	0.820207	149.179	143.243	121.827	133.779	125.448	130.775	Rab5a	ENSMUSG00000017831	RAB5A, member RAS oncogene family [Source:MGI Symbol;Acc:MGI:105926]
ENSMUST00000164834	75.0896	0.120364	0.217422	0.553595	0.579856	0.820207	70.995	73.4345	88.9247	73.083	90.6016	53.499	Gpr62	ENSMUSG00000091735	G protein-coupled receptor 62 [Source:MGI Symbol;Acc:MGI:3525078]
ENSMUST00000172483	92.181	0.106909	0.193123	0.553581	0.579866	0.820207	91.6644	87.0335	106.71	109.005	84.7938	73.8796	Gm20512	ENSMUSG00000092381	predicted gene 20512 [Source:MGI Symbol;Acc:MGI:5141977]
ENSMUST00000199277	488.362	-0.0557173	0.100829	-0.552591	0.580543	0.820207	468.207	527.64	441.956	480.614	497.147	514.61	Lrrc17	ENSMUSG00000039883	leucine rich repeat containing 17 [Source:MGI Symbol;Acc:MGI:1921761]
ENSMUST00000032237	86.7085	0.118134	0.214233	0.551427	0.581341	0.820823	105.144	79.7807	87.1462	53.2639	96.4094	98.5061	Bms1	ENSMUSG00000030138	BMS1, ribosome biogenesis factor [Source:MGI Symbol;Acc:MGI:2446132]
ENSMUST00000040430	69.7434	0.115313	0.209947	0.549247	0.582836	0.821401	84.4751	69.8081	63.1365	70.6056	65.0473	65.3877	Vat1	ENSMUSG00000034993	vesicle amine transport 1 [Source:MGI Symbol;Acc:MGI:1349450]
ENSMUST00000191174	97.2123	-0.0989115	0.180041	-0.549384	0.582742	0.821401	82.6777	96.0995	102.263	107.767	101.056	93.411	Mindy4b-ps	ENSMUSG00000101860	MINDY lysine 48 deubiquitinase 4B, pseudogene [Source:MGI Symbol;Acc:MGI:2140018]
ENSMUST00000226873	106.226	-0.0957292	0.174281	-0.549282	0.582812	0.821401	115.03	96.0995	96.9279	100.334	121.964	106.998	Styx	ENSMUSG00000053205	serine/threonine/tyrosine interaction protein [Source:MGI Symbol;Acc:MGI:1891150]
ENSMUST00000022618	162.99	-0.0799062	0.145773	-0.548155	0.583585	0.821464	165.355	139.616	170.735	157.314	174.234	170.687	Adam2	ENSMUSG00000022039	a disintegrin and metallopeptidase domain 2 [Source:MGI Symbol;Acc:MGI:1340894]
ENSMUST00000110741	110.698	-0.0919579	0.167768	-0.548126	0.583605	0.821464	115.03	102.446	104.042	107.767	121.964	112.942	Fam90a1a	ENSMUSG00000079112	family with sequence similarity 90, member A1A [Source:MGI Symbol;Acc:MGI:2142877]
ENSMUST00000038166	508.744	0.0590443	0.10802	0.546604	0.584651	0.821916	517.634	584.756	454.405	484.33	536.64	474.698	Dhx57	ENSMUSG00000035051	DEAH (Asp-Glu-Ala-Asp/His) box polypeptide 57 [Source:MGI Symbol;Acc:MGI:2147067]
ENSMUST00000073081	165.107	-0.0890093	0.162815	-0.546691	0.584591	0.821916	178.835	136.896	165.4	182.088	131.256	196.163	1700010B08Rik	ENSMUSG00000057047	RIKEN cDNA 1700010B08 gene [Source:MGI Symbol;Acc:MGI:1922735]
ENSMUST00000030464	98.1072	0.100739	0.185104	0.54423	0.586283	0.822896	103.347	95.1929	107.599	84.2313	83.6322	114.641	Pik3r3	ENSMUSG00000028698	phosphoinositide-3-kinase regulatory subunit 3 [Source:MGI Symbol;Acc:MGI:109277]
ENSMUST00000064447	310.489	0.12671	0.233145	0.543481	0.586798	0.822896	401.706	270.166	301.455	242.784	292.713	354.113	Nup188	ENSMUSG00000052533	nucleoporin 188 [Source:MGI Symbol;Acc:MGI:2446190]
ENSMUST00000115116	234.364	-0.0745256	0.136868	-0.544507	0.586092	0.822896	221.073	252.941	208.973	253.933	267.159	202.107	Muc20	ENSMUSG00000035638	mucin 20 [Source:MGI Symbol;Acc:MGI:2385039]
ENSMUST00000133160	82.3123	-0.119541	0.21984	-0.54376	0.586607	0.822896	81.779	63.4619	89.8139	105.289	94.0863	59.4433	Gm11592	ENSMUSG00000086680	predicted gene 11592 [Source:MGI Symbol;Acc:MGI:3650504]
ENSMUST00000192584	111.065	0.0915127	0.169006	0.541475	0.58818	0.824324	105.144	121.484	116.491	117.676	104.54	101.054	Ncam1	ENSMUSG00000039542	neural cell adhesion molecule 1 [Source:MGI Symbol;Acc:MGI:97281]
ENSMUST00000119397	94.7342	0.101422	0.18794	0.539649	0.589439	0.825578	109.638	105.165	79.143	87.9474	99.894	86.6174	Gm5913	ENSMUSG00000081111	predicted gene 5913 [Source:MGI Symbol;Acc:MGI:3648292]
ENSMUST00000002350	66.4535	-0.114748	0.213523	-0.537406	0.590987	0.826306	65.603	56.2091	70.2505	63.1735	66.2088	77.2764	Ciao3	ENSMUSG00000002280	cytosolic iron-sulfur assembly component 3 [Source:MGI Symbol;Acc:MGI:1914813]
ENSMUST00000014957	346.116	-0.0665882	0.123928	-0.537313	0.591051	0.826306	343.292	338.161	329.911	387.712	391.445	286.177	Stc1	ENSMUSG00000014813	stanniocalcin 1 [Source:MGI Symbol;Acc:MGI:109131]
ENSMUST00000105808	159.277	-0.0839288	0.156056	-0.537813	0.590706	0.826306	185.126	151.402	127.162	164.746	168.426	158.799	Pla2g2c	ENSMUSG00000028750	phospholipase A2, group IIC [Source:MGI Symbol;Acc:MGI:106638]
ENSMUST00000078505	87.5455	-0.100584	0.188013	-0.534982	0.592662	0.826522	83.5764	81.5939	88.9247	76.7991	97.5709	96.8077	Rtn1	ENSMUSG00000021087	reticulon 1 [Source:MGI Symbol;Acc:MGI:1933947]
ENSMUST00000151282	120.84	-0.0874484	0.163434	-0.535069	0.592602	0.826522	119.523	120.578	111.156	115.199	140.549	118.038	Gm11706	ENSMUSG00000084930	predicted gene 11706 [Source:MGI Symbol;Acc:MGI:3651837]
ENSMUST00000163892	69.8982	0.111889	0.209007	0.535335	0.592418	0.826522	69.1976	81.5939	66.6935	64.4122	75.5013	61.9909	4930523C07Rik	ENSMUSG00000090394	RIKEN cDNA 4930523C07 gene [Source:MGI Symbol;Acc:MGI:1914897]
ENSMUST00000228178	70.8235	0.115579	0.215832	0.535505	0.592301	0.826522	62.907	93.3797	64.915	64.4122	69.6935	69.6336	Gm16976	ENSMUSG00000085500	predicted gene, 16976 [Source:MGI Symbol;Acc:MGI:4439900]
ENSMUST00000071103	116.601	0.0881824	0.165663	0.532299	0.594519	0.826571	122.219	107.885	130.719	112.721	108.025	118.038	Ddx1	ENSMUSG00000037149	DEAD (Asp-Glu-Ala-Asp) box polypeptide 1 [Source:MGI Symbol;Acc:MGI:2144727]
ENSMUST00000121394	106.282	-0.0944156	0.177202	-0.532812	0.594164	0.826571	102.448	96.0995	108.488	120.153	119.641	90.8634	Prss53	ENSMUSG00000044139	protease, serine 53 [Source:MGI Symbol;Acc:MGI:2652890]
ENSMUST00000180741	164.731	0.0822605	0.154086	0.53386	0.593438	0.826571	163.558	189.479	153.84	159.792	185.849	135.871	Gm16630	ENSMUSG00000097434	predicted gene, 16630 [Source:MGI Symbol;Acc:MGI:4439554]
ENSMUST00000183108	110.1	-0.0891689	0.167491	-0.532381	0.594462	0.826571	101.55	111.512	107.599	109.005	110.348	120.585	Xpnpep1	ENSMUSG00000025027	X-prolyl aminopeptidase (aminopeptidase P) 1, soluble [Source:MGI Symbol;Acc:MGI:2180003]
ENSMUST00000207548	107.725	0.0949973	0.17797	0.533782	0.593492	0.826571	129.409	97.0061	106.71	102.812	116.156	94.2602	Gm45133	ENSMUSG00000109274	predicted gene 45133 [Source:MGI Symbol;Acc:MGI:5753709]
ENSMUST00000156629	90.1011	-0.105174	0.198265	-0.530471	0.595786	0.82755	74.5897	109.698	75.586	104.05	91.7631	84.9191	1700093K21Rik	ENSMUSG00000020286	RIKEN cDNA 1700093K21 gene [Source:MGI Symbol;Acc:MGI:1914608]
ENSMUST00000180521	77.3301	0.119452	0.225283	0.53023	0.595953	0.82755	98.8538	69.8081	72.029	65.6509	99.894	57.745	1810049J17Rik	ENSMUSG00000097221	RIKEN cDNA 1810049J17 gene [Source:MGI Symbol;Acc:MGI:3704453]
ENSMUST00000068031	85.6289	-0.107248	0.202913	-0.528541	0.597124	0.827983	74.5897	73.4345	100.485	74.3217	84.7938	106.149	Top2a	ENSMUSG00000020914	topoisomerase (DNA) II alpha [Source:MGI Symbol;Acc:MGI:98790]
ENSMUST00000180738	158.908	-0.0813868	0.154184	-0.527855	0.5976	0.827983	128.51	176.787	157.397	161.03	177.718	152.005	Gm17529	ENSMUSG00000097443	predicted gene, 17529 [Source:MGI Symbol;Acc:MGI:4937163]
ENSMUST00000188240	97.1417	0.0952658	0.180538	0.527676	0.597724	0.827983	93.4618	106.072	100.485	104.05	96.4094	82.3715	Gm6124	ENSMUSG00000102017	predicted gene 6124 [Source:MGI Symbol;Acc:MGI:3779556]
ENSMUST00000238395	89.1913	-0.0989866	0.187226	-0.528701	0.597013	0.827983	78.1844	85.2203	94.2602	102.812	90.6016	84.0699	AC153579.1	ENSMUSG00000118448	alpha-2-macroglobulin-like 1 (A2ML1) pseudogene
ENSMUST00000192563	151.357	0.0797374	0.151389	0.526704	0.598399	0.828412	177.038	144.149	144.947	147.405	154.487	140.116	Gm37542	ENSMUSG00000102291	predicted gene, 37542 [Source:MGI Symbol;Acc:MGI:5610770]
ENSMUST00000082419	106.558	0.10224	0.194533	0.525566	0.59919	0.828496	93.4618	103.352	133.387	90.4248	131.256	87.4666	mt-Nd6	ENSMUSG00000064368	mitochondrially encoded NADH dehydrogenase 6 [Source:MGI Symbol;Acc:MGI:102495]
ENSMUST00000127918	81.9826	0.178252	0.338853	0.526044	0.598857	0.828496	90.7657	59.8355	111.156	56.98	75.5013	97.6569	Gm13941	ENSMUSG00000079170	predicted gene 13941 [Source:MGI Symbol;Acc:MGI:3651375]
ENSMUST00000031215	65.5304	-0.12481	0.239244	-0.521683	0.601891	0.831724	46.7309	88.8467	52.4656	71.8443	66.2088	67.0861	Brdt	ENSMUSG00000029279	bromodomain, testis-specific [Source:MGI Symbol;Acc:MGI:1891374]
ENSMUST00000204498	83.8797	0.100961	0.193811	0.520925	0.602419	0.831947	92.5631	79.7807	88.9247	66.8896	85.9553	89.165	Gm44280	ENSMUSG00000107944	predicted gene, 44280 [Source:MGI Symbol;Acc:MGI:5690672]
ENSMUST00000141411	163.359	-0.0826911	0.159262	-0.519214	0.603612	0.833087	164.457	184.04	127.162	190.759	149.841	163.894	Spata25	ENSMUSG00000017767	spermatogenesis associated 25 [Source:MGI Symbol;Acc:MGI:1922892]
ENSMUST00000032877	84.8256	0.113393	0.218735	0.518406	0.604175	0.833358	82.6777	65.2751	117.381	66.8896	82.4707	94.2602	Ddias	ENSMUSG00000030641	DNA damage-induced apoptosis suppressor [Source:MGI Symbol;Acc:MGI:1921291]
ENSMUST00000170103	70.8684	-0.109726	0.21191	-0.517798	0.6046	0.833436	80.8804	61.6487	61.358	84.2313	70.8551	66.2369	Gm17251	ENSMUSG00000090952	predicted gene, 17251 [Source:MGI Symbol;Acc:MGI:4936885]
ENSMUST00000051080	108.936	-0.0891741	0.172734	-0.516251	0.605679	0.834417	115.929	110.605	89.8139	116.437	113.833	106.998	Gm9806	ENSMUSG00000046388	predicted gene 9806 [Source:MGI Symbol;Acc:MGI:3708646]
ENSMUST00000066285	127.134	0.0913582	0.178077	0.513027	0.607932	0.837014	114.131	160.468	120.048	97.8569	133.579	136.72	Hspa12a	ENSMUSG00000025092	heat shock protein 12A [Source:MGI Symbol;Acc:MGI:1920692]
ENSMUST00000156128	112.388	-0.0916732	0.179175	-0.511642	0.608902	0.837598	117.726	116.045	93.3709	126.347	91.7631	129.077	Phykpl	ENSMUSG00000020359	5-phosphohydroxy-L-lysine phospholyase [Source:MGI Symbol;Acc:MGI:1920197]
ENSMUST00000172202	179.827	-0.0737863	0.144293	-0.511366	0.609095	0.837598	184.228	192.199	148.504	191.998	190.496	171.537	Gm17300	ENSMUSG00000091021	predicted gene, 17300 [Source:MGI Symbol;Acc:MGI:4936934]
ENSMUST00000031488	150.492	0.0787975	0.154552	0.509844	0.610161	0.83803	173.443	160.468	129.83	141.211	154.487	143.513	Gm6605	ENSMUSG00000094920	predicted gene 6605 [Source:MGI Symbol;Acc:MGI:3644762]
ENSMUST00000090246	105.974	0.0999086	0.196541	0.508333	0.61122	0.83803	111.435	80.6873	136.944	86.7087	117.317	102.752	Sgms2	ENSMUSG00000050931	sphingomyelin synthase 2 [Source:MGI Symbol;Acc:MGI:1921692]
ENSMUST00000160285	118.606	0.0828524	0.163005	0.508281	0.611256	0.83803	115.929	121.484	128.052	115.199	123.125	107.847	Wdr63	ENSMUSG00000043020	WD repeat domain 63 [Source:MGI Symbol;Acc:MGI:3045269]
ENSMUST00000174163	433.874	-0.0528039	0.103466	-0.510352	0.609805	0.83803	396.314	466.898	415.278	445.93	422.807	456.015	1600012H06Rik	ENSMUSG00000050088	RIKEN cDNA 1600012H06 gene [Source:MGI Symbol;Acc:MGI:1915162]
ENSMUST00000193181	88.7914	-0.0967299	0.190207	-0.508551	0.611067	0.83803	100.651	78.8741	77.3645	95.3795	96.4094	84.0699	Gm38368	ENSMUSG00000104427	predicted gene, 38368 [Source:MGI Symbol;Acc:MGI:5611596]
ENSMUST00000005017	118.661	0.0887475	0.174793	0.507728	0.611644	0.838056	106.942	128.737	132.498	90.4248	124.287	129.077	Hdgf	ENSMUSG00000004897	heparin binding growth factor [Source:MGI Symbol;Acc:MGI:1194494]
ENSMUST00000096249	68.4373	0.107456	0.213875	0.502424	0.615369	0.840964	83.5764	58.9289	70.2505	70.6056	62.7242	64.5385	Ints5	ENSMUSG00000071652	integrator complex subunit 5 [Source:MGI Symbol;Acc:MGI:1923578]
ENSMUST00000122972	1216.48	-0.0427127	0.08509	-0.501971	0.615688	0.840964	1113.45	1306.41	1173.81	1306.82	1223.12	1175.28	Gm15601	ENSMUSG00000085913	predicted gene 15601 [Source:MGI Symbol;Acc:MGI:3783048]
ENSMUST00000135068	87.9632	0.0965493	0.192565	0.501385	0.6161	0.840964	106.942	84.3137	81.8107	74.3217	92.9247	87.4666	Gm15932	ENSMUSG00000086341	predicted gene 15932 [Source:MGI Symbol;Acc:MGI:3802106]
ENSMUST00000145988	433.234	0.0567392	0.112705	0.50343	0.614662	0.840964	480.789	402.53	443.734	364.176	453.008	455.166	Dnhd1	ENSMUSG00000030882	dynein heavy chain domain 1 [Source:MGI Symbol;Acc:MGI:1924755]
ENSMUST00000180988	163.976	-0.072555	0.144816	-0.501015	0.616361	0.840964	143.787	169.534	165.4	179.611	168.426	157.1	Gm26912	ENSMUSG00000097832	predicted gene, 26912 [Source:MGI Symbol;Acc:MGI:5477406]
ENSMUST00000187565	147.352	0.0796522	0.158942	0.50114	0.616273	0.840964	136.598	171.347	144.947	148.643	160.295	122.283	Gm21115	ENSMUSG00000100841	predicted gene, 21115 [Source:MGI Symbol;Acc:MGI:5434470]
ENSMUST00000190598	116.996	-0.0855068	0.169613	-0.504127	0.614172	0.840964	132.105	105.165	103.153	113.96	131.256	116.339	Gm29017	ENSMUSG00000101586	predicted gene 29017 [Source:MGI Symbol;Acc:MGI:5579723]
ENSMUST00000146631	97.4019	0.148803	0.297768	0.499728	0.617267	0.841694	81.779	135.083	89.8139	117.676	83.6322	76.4272	Gm7666	ENSMUSG00000067547	predicted pseudogene 7666 [Source:MGI Symbol;Acc:MGI:3648907]
ENSMUST00000103255	106.809	0.0861221	0.173048	0.497677	0.618711	0.842612	97.9551	123.297	108.488	109.005	101.056	101.054	Mir762	ENSMUSG00000076454	microRNA 762 [Source:MGI Symbol;Acc:MGI:3691607]
ENSMUST00000125853	85.2611	0.0999374	0.20143	0.49614	0.619796	0.842612	110.537	69.8081	84.4784	80.5152	81.3091	84.9191	Gm12316	ENSMUSG00000086976	predicted gene 12316 [Source:MGI Symbol;Acc:MGI:3651760]
ENSMUST00000152330	213.589	0.0688318	0.139178	0.494559	0.620911	0.842612	197.708	240.249	216.087	231.636	218.373	177.481	Zfp974	ENSMUSG00000070709	zinc finger protein 974 [Source:MGI Symbol;Acc:MGI:1920680]
ENSMUST00000152351	71.7614	-0.104886	0.210844	-0.497459	0.618866	0.842612	74.5897	63.4619	70.2505	75.5604	59.2395	87.4666	Fhad1os2	ENSMUSG00000085922	forkhead-associated (FHA) phosphopeptide binding domain 1, opposite strand 2 [Source:MGI Symbol;Acc:MGI:3651870]
ENSMUST00000177015	95.8805	0.093038	0.187337	0.496634	0.619447	0.842612	87.1711	119.671	89.8139	100.334	88.2785	90.0142	A730085K08Rik	ENSMUSG00000093598	RIKEN cDNA A730085K08 gene [Source:MGI Symbol;Acc:MGI:3605633]
ENSMUST00000210728	408.587	0.0563285	0.113615	0.495783	0.620047	0.842612	350.482	457.832	441.066	400.099	408.869	393.175	Gm45464	ENSMUSG00000109727	predicted gene 45464 [Source:MGI Symbol;Acc:MGI:5791300]
ENSMUST00000226077	113.506	-0.0841222	0.170061	-0.49466	0.62084	0.842612	102.448	116.045	112.045	102.812	134.741	112.942	Gm47756	ENSMUSG00000114946	predicted gene, 47756 [Source:MGI Symbol;Acc:MGI:6096903]
ENSMUST00000228553	86.1048	0.0946915	0.191224	0.495187	0.620468	0.842612	89.8671	90.6599	85.3677	82.9926	96.4094	71.332	Gm49036	ENSMUSG00000114990	predicted gene, 49036 [Source:MGI Symbol;Acc:MGI:6118409]
ENSMUST00000125902	157.295	-0.0741779	0.150294	-0.493553	0.621622	0.842619	149.179	147.776	161.843	153.598	187.011	144.362	4930404I05Rik	ENSMUSG00000087354	RIKEN cDNA 4930404I05 gene [Source:MGI Symbol;Acc:MGI:1914644]
ENSMUST00000207796	478.939	0.047978	0.0972198	0.493501	0.621659	0.842619	494.269	507.695	457.962	490.523	464.623	458.563	Acsm5	ENSMUSG00000030972	acyl-CoA synthetase medium-chain family member 5 [Source:MGI Symbol;Acc:MGI:2444086]
ENSMUST00000202274	110.054	0.0834013	0.169546	0.491909	0.622783	0.843639	118.625	100.632	120.048	110.244	108.025	102.752	Gm42726	ENSMUSG00000107102	predicted gene 42726 [Source:MGI Symbol;Acc:MGI:5662863]
ENSMUST00000217654	439.543	-0.0503562	0.103206	-0.487917	0.625608	0.84696	409.794	473.245	411.721	448.408	466.947	427.143	Gm48796	ENSMUSG00000111390	predicted gene, 48796 [Source:MGI Symbol;Acc:MGI:6098500]
ENSMUST00000095998	147.513	0.0739049	0.151645	0.487354	0.626008	0.846995	156.369	143.243	154.729	153.598	124.287	152.854	Itprip	ENSMUSG00000117975	inositol 1,4,5-triphosphate receptor interacting protein [Source:MGI Symbol;Acc:MGI:3042776]
ENSMUST00000044278	62.1254	-0.108563	0.225458	-0.481525	0.630144	0.847548	62.0083	70.7147	47.1301	58.2187	65.0473	69.6336	St6galnac5	ENSMUSG00000039037	ST6 (alpha-N-acetyl-neuraminyl-2,3-beta-galactosyl-1,3)-N-acetylgalactosaminide alpha-2,6-sialyltransferase 5 [Source:MGI Symbol;Acc:MGI:1349471]
ENSMUST00000046835	89.2743	-0.0985641	0.20426	-0.482543	0.62942	0.847548	89.8671	71.6213	98.7064	79.2765	78.986	117.188	Fnip1	ENSMUSG00000035992	folliculin interacting protein 1 [Source:MGI Symbol;Acc:MGI:2444668]
ENSMUST00000048580	201.381	0.0664385	0.138308	0.480367	0.630966	0.847548	178.835	213.957	224.09	203.146	209.081	179.179	Tsga13	ENSMUSG00000039032	testis specific gene A13 [Source:MGI Symbol;Acc:MGI:1891413]
ENSMUST00000145085	118.995	0.0873441	0.180292	0.484458	0.628061	0.847548	152.774	118.764	96.9279	106.528	114.994	123.982	Gm16741	ENSMUSG00000084775	predicted gene, 16741 [Source:MGI Symbol;Acc:MGI:4439665]
ENSMUST00000147848	186.612	-0.0686694	0.14171	-0.484575	0.627978	0.847548	164.457	194.012	186.742	218.01	182.365	174.084	4931406G06Rik	ENSMUSG00000085398	RIKEN cDNA 4931406G06 gene [Source:MGI Symbol;Acc:MGI:1918228]
ENSMUST00000149601	123.452	-0.0775991	0.160694	-0.482901	0.629166	0.847548	132.105	116.951	111.156	127.586	128.933	123.982	Hectd2os	ENSMUSG00000087579	Hectd2, opposite strand [Source:MGI Symbol;Acc:MGI:1919243]
ENSMUST00000176020	301.023	-0.0593711	0.123702	-0.479953	0.631261	0.847548	249.83	331.815	302.344	302.242	325.236	294.669	Gm3896	ENSMUSG00000093721	predicted gene 3896 [Source:MGI Symbol;Acc:MGI:3782069]
ENSMUST00000180417	192.006	-0.0713761	0.147207	-0.484868	0.62777	0.847548	195.91	186.759	177.849	182.088	240.443	168.989	Emc8	ENSMUSG00000031819	ER membrane protein complex subunit 8 [Source:MGI Symbol;Acc:MGI:1343095]
ENSMUST00000185541	557.846	-0.0487339	0.101311	-0.48103	0.630495	0.847548	582.339	554.838	505.981	574.755	617.949	511.213	Gm29326	ENSMUSG00000100400	predicted gene 29326 [Source:MGI Symbol;Acc:MGI:5580032]
ENSMUST00000198018	375.7	-0.0558883	0.115598	-0.483472	0.62876	0.847548	406.199	387.118	312.126	367.893	399.576	381.287	Gm44313	ENSMUSG00000106175	predicted gene, 44313 [Source:MGI Symbol;Acc:MGI:5690705]
ENSMUST00000201648	164.864	-0.0788923	0.164151	-0.480608	0.630795	0.847548	150.078	199.452	130.719	193.236	160.295	155.402	Gm42531	ENSMUSG00000107178	predicted gene 42531 [Source:MGI Symbol;Acc:MGI:5662668]
ENSMUST00000219046	383.37	-0.0526692	0.108443	-0.485684	0.627191	0.847548	360.367	419.755	348.585	397.621	392.607	381.287	Gm47958	ENSMUSG00000112684	predicted gene, 47958 [Source:MGI Symbol;Acc:MGI:6097232]
ENSMUST00000226752	1075.19	-0.0461737	0.0962077	-0.479938	0.631272	0.847548	945.402	1223.91	1003.96	1125.97	1089.54	1062.34	Gm49179	ENSMUSG00000115718	predicted gene, 49179 [Source:MGI Symbol;Acc:MGI:6118614]
ENSMUST00000047281	121.976	0.0826172	0.172742	0.478268	0.632459	0.847669	143.787	134.177	98.7064	121.392	111.51	122.283	Trir	ENSMUSG00000041203	telomerase RNA component interacting RNase [Source:MGI Symbol;Acc:MGI:1922833]
ENSMUST00000094028	87.6602	0.0947427	0.197905	0.478729	0.632131	0.847669	92.5631	80.6873	99.5956	82.9926	67.3704	102.752	Capza1	ENSMUSG00000070372	capping protein (actin filament) muscle Z-line, alpha 1 [Source:MGI Symbol;Acc:MGI:106227]
ENSMUST00000239043	84.4027	0.0923064	0.193015	0.478235	0.632483	0.847669	95.2591	87.9401	77.3645	84.2313	89.44	72.1812	AC163638.1	ENSMUSG00000118498	discs large MAGUK scaffold protein 5 (Dig5) pseudogene
ENSMUST00000050063	96.3664	0.0848157	0.178429	0.475348	0.634539	0.849422	96.1578	95.1929	105.82	101.573	89.44	90.0142	Arf6	ENSMUSG00000044147	ADP-ribosylation factor 6 [Source:MGI Symbol;Acc:MGI:99435]
ENSMUST00000215295	73.399	0.0988384	0.207925	0.475356	0.634534	0.849422	73.691	78.8741	76.4752	63.1735	61.5626	86.6174	Syne1	ENSMUSG00000096054	spectrin repeat containing, nuclear envelope 1 [Source:MGI Symbol;Acc:MGI:1927152]
ENSMUST00000018988	82.1896	0.096107	0.202439	0.474744	0.634969	0.849435	105.144	73.4345	76.4752	70.6056	85.9553	81.5223	Fndc8	ENSMUSG00000018844	fibronectin type III domain containing 8 [Source:MGI Symbol;Acc:MGI:1926169]
ENSMUST00000060479	65.5914	0.103731	0.218954	0.473758	0.635672	0.849435	71.8937	69.8081	63.1365	48.3091	67.3704	73.0304	Ush2a	ENSMUSG00000026609	usherin [Source:MGI Symbol;Acc:MGI:1341292]
ENSMUST00000135913	106.905	0.0882146	0.186156	0.473875	0.635589	0.849435	114.131	93.3797	124.495	81.7539	104.54	123.133	5830417I10Rik	ENSMUSG00000078684	RIKEN cDNA 5830417I10 gene [Source:MGI Symbol;Acc:MGI:1923272]
ENSMUST00000197680	131.572	0.0772759	0.163517	0.472586	0.636509	0.849631	138.395	128.737	137.833	110.244	154.487	119.736	Mttp	ENSMUSG00000028158	microsomal triglyceride transfer protein [Source:MGI Symbol;Acc:MGI:106926]
ENSMUST00000199658	63.5143	-0.101487	0.214786	-0.472503	0.636568	0.849631	64.7043	58.0223	61.358	68.1282	59.2395	69.6336	Gm17359	ENSMUSG00000091685	predicted gene, 17359 [Source:MGI Symbol;Acc:MGI:4936993]
ENSMUST00000157036	1423.64	0.0400043	0.0850141	0.47056	0.637955	0.849699	1409.12	1593.8	1325.87	1420.78	1453.11	1339.17	Dock2	ENSMUSG00000020143	dedicator of cyto-kinesis 2 [Source:MGI Symbol;Acc:MGI:2149010]
ENSMUST00000172644	116.769	0.079701	0.169219	0.470994	0.637645	0.849699	125.814	127.83	105.82	107.767	128.933	104.45	Gm20476	ENSMUSG00000092364	predicted gene 20476 [Source:MGI Symbol;Acc:MGI:5141941]
ENSMUST00000190567	79.4036	-0.0977059	0.207737	-0.470334	0.638117	0.849699	80.8804	65.2751	84.4784	91.6635	61.5626	92.5618	A630072M18Rik	ENSMUSG00000101013	RIKEN cDNA A630072M18 gene [Source:MGI Symbol;Acc:MGI:2444702]
ENSMUST00000216858	70.7109	0.0974157	0.206674	0.471348	0.637392	0.849699	70.995	77.0609	71.1397	60.6961	78.986	65.3877	Gm7787	ENSMUSG00000111272	predicted gene 7787 [Source:MGI Symbol;Acc:MGI:3648685]
ENSMUST00000099337	144.124	-0.0812465	0.173154	-0.469215	0.638916	0.850264	118.625	150.495	149.393	189.52	133.579	123.133	Plxnc1	ENSMUSG00000074785	plexin C1 [Source:MGI Symbol;Acc:MGI:1890127]
ENSMUST00000231833	193.559	-0.0638683	0.136545	-0.467747	0.639966	0.851162	195.91	184.04	186.742	194.475	221.858	178.33	Gm49719	ENSMUSG00000116618	predicted gene, 49719 [Source:MGI Symbol;Acc:MGI:6215192]
ENSMUST00000203049	107.112	0.0846621	0.18133	0.466896	0.640575	0.851473	103.347	124.204	102.263	99.0956	125.448	88.3158	Gm44264	ENSMUSG00000107561	predicted gene, 44264 [Source:MGI Symbol;Acc:MGI:5690656]
ENSMUST00000032413	154.201	-0.072558	0.155966	-0.465218	0.641775	0.851798	137.497	154.122	160.954	128.824	163.78	180.028	Etnk1	ENSMUSG00000030275	ethanolamine kinase 1 [Source:MGI Symbol;Acc:MGI:1922570]
ENSMUST00000061639	175.83	0.0731028	0.157143	0.4652	0.641788	0.851798	141.091	196.732	201.859	177.133	187.011	151.156	Spty2d1	ENSMUSG00000049516	SPT2 chromatin protein domain containing 1 [Source:MGI Symbol;Acc:MGI:2142062]
ENSMUST00000180996	62.238	-0.106279	0.228567	-0.46498	0.641946	0.851798	46.7309	72.5279	60.4688	58.2187	74.3398	61.1417	AY702103	ENSMUSG00000067103	cDNA sequence AY702103 [Source:MGI Symbol;Acc:MGI:3525105]
ENSMUST00000194930	526.265	-0.0448624	0.0968393	-0.463266	0.643174	0.852431	477.194	558.465	519.32	520.252	535.479	546.879	Gm37518	ENSMUSG00000103258	predicted gene, 37518 [Source:MGI Symbol;Acc:MGI:5610746]
ENSMUST00000217414	100.837	-0.0899557	0.194124	-0.463393	0.643082	0.852431	76.387	118.764	96.9279	109.005	117.317	86.6174	Gm48127	ENSMUSG00000111271	predicted gene, 48127 [Source:MGI Symbol;Acc:MGI:6097485]
ENSMUST00000034591	96.6267	-0.0881187	0.190775	-0.461898	0.644154	0.853232	94.3604	114.231	72.9182	95.3795	97.5709	105.3	Bace1	ENSMUSG00000032086	beta-site APP cleaving enzyme 1 [Source:MGI Symbol;Acc:MGI:1346542]
ENSMUST00000203822	543.42	-0.0446596	0.0972055	-0.459435	0.645922	0.855074	545.493	566.624	491.753	552.458	581.941	522.252	Gm43863	ENSMUSG00000107608	predicted gene, 43863 [Source:MGI Symbol;Acc:MGI:5690255]
ENSMUST00000078816	94.4533	0.0842323	0.184242	0.457183	0.64754	0.856716	104.246	97.9127	90.7032	81.7539	85.9553	106.149	9130023H24Rik	ENSMUSG00000062944	RIKEN cDNA 9130023H24 gene [Source:MGI Symbol;Acc:MGI:2442738]
ENSMUST00000030207	81.207	-0.0916008	0.200848	-0.456071	0.648339	0.857069	68.299	82.5005	86.2569	71.8443	78.986	99.3553	Psip1	ENSMUSG00000028484	PC4 and SFRS1 interacting protein 1 [Source:MGI Symbol;Acc:MGI:2142116]
ENSMUST00000054125	117.464	-0.0770818	0.169128	-0.455761	0.648562	0.857069	98.8538	131.457	112.934	111.483	127.771	122.283	Pmel	ENSMUSG00000025359	premelanosome protein [Source:MGI Symbol;Acc:MGI:98301]
ENSMUST00000121655	121.888	-0.0766208	0.168454	-0.454848	0.649218	0.857437	123.118	130.55	101.374	128.824	137.064	110.395	Got2-ps1	ENSMUSG00000080935	glutamatic-oxaloacetic transaminase 2, mitochondrial, pseudogene 1 [Source:MGI Symbol;Acc:MGI:104721]
ENSMUST00000226781	88.5354	-0.0896747	0.19743	-0.45421	0.649677	0.857544	96.1578	77.9675	81.8107	104.05	99.894	71.332	Eppk1	ENSMUSG00000115388	epiplakin 1 [Source:MGI Symbol;Acc:MGI:2386306]
ENSMUST00000165870	99.0186	-0.0860245	0.190435	-0.451727	0.651466	0.859404	97.0564	97.9127	91.5924	111.483	119.641	76.4272	Stk32c	ENSMUSG00000015981	serine/threonine kinase 32C [Source:MGI Symbol;Acc:MGI:2385336]
ENSMUST00000020625	77.5463	-0.0891433	0.200027	-0.445656	0.655846	0.860987	74.5897	70.7147	79.143	90.4248	82.4707	67.9353	Phykpl	ENSMUSG00000020359	5-phosphohydroxy-L-lysine phospholyase [Source:MGI Symbol;Acc:MGI:1920197]
ENSMUST00000030538	125.221	0.0710146	0.158865	0.447012	0.654867	0.860987	133.902	126.924	124.495	125.108	112.671	128.228	Ddost	ENSMUSG00000028757	dolichyl-di-phosphooligosaccharide-protein glycotransferase [Source:MGI Symbol;Acc:MGI:1194508]
ENSMUST00000031288	127.027	-0.0761817	0.171139	-0.445146	0.656214	0.860987	108.739	152.309	109.377	138.734	132.418	120.585	Tfip11	ENSMUSG00000029345	tuftelin interacting protein 11 [Source:MGI Symbol;Acc:MGI:1930075]
ENSMUST00000034385	63.1399	0.100534	0.226285	0.444281	0.656839	0.860987	55.7176	76.1543	64.915	61.9348	48.7855	71.332	Has3	ENSMUSG00000031910	hyaluronan synthase 3 [Source:MGI Symbol;Acc:MGI:109599]
ENSMUST00000066987	157.977	-0.0658981	0.14703	-0.448195	0.654013	0.860987	167.153	138.71	156.507	164.746	169.588	151.156	Galnt10	ENSMUSG00000020520	polypeptide N-acetylgalactosaminyltransferase 10 [Source:MGI Symbol;Acc:MGI:1890480]
ENSMUST00000120426	184.391	0.061182	0.136527	0.448132	0.654058	0.860987	181.531	203.078	179.628	187.043	183.526	171.537	Aktip	ENSMUSG00000031667	thymoma viral proto-oncogene 1 interacting protein [Source:MGI Symbol;Acc:MGI:3693832]
ENSMUST00000143715	451.601	-0.0463753	0.104322	-0.44454	0.656653	0.860987	411.591	486.844	433.063	479.375	471.593	427.143	1700095J03Rik	ENSMUSG00000085407	RIKEN cDNA 1700095J03 gene [Source:MGI Symbol;Acc:MGI:1921543]
ENSMUST00000149604	86.9801	0.0866461	0.194473	0.445542	0.655928	0.860987	74.5897	89.7533	104.931	84.2313	76.6629	91.7126	Syna	ENSMUSG00000085957	syncytin a [Source:MGI Symbol;Acc:MGI:2684898]
ENSMUST00000204642	81.6399	-0.087272	0.195023	-0.447496	0.654517	0.860987	88.0697	70.7147	79.143	86.7087	74.3398	90.8634	9330102E08Rik	ENSMUSG00000107879	RIKEN cDNA 9330102E08 gene [Source:MGI Symbol;Acc:MGI:3026973]
ENSMUST00000209149	64.6679	-0.0988646	0.222429	-0.444477	0.656698	0.860987	49.4269	64.3685	72.9182	71.8443	70.8551	58.5942	Gm32850	ENSMUSG00000108868	predicted gene, 32850 [Source:MGI Symbol;Acc:MGI:5592009]
ENSMUST00000211533	135.512	0.0687458	0.154559	0.444787	0.656474	0.860987	126.713	142.336	147.615	127.586	131.256	137.569	A030001D20Rik	ENSMUSG00000110357	RIKEN cDNA A030001D20 gene [Source:MGI Symbol;Acc:MGI:3696869]
ENSMUST00000187511	132.568	-0.0693878	0.157969	-0.439251	0.66048	0.865259	130.307	136.896	120.938	122.631	152.164	132.474	Gm19582	ENSMUSG00000101942	predicted gene, 19582 [Source:MGI Symbol;Acc:MGI:5011767]
ENSMUST00000053211	88.2646	-0.0938406	0.214121	-0.43826	0.661198	0.8657	97.9551	72.5279	87.1462	89.1861	63.8857	118.887	Mfsd6l	ENSMUSG00000048329	major facilitator superfamily domain containing 6-like [Source:MGI Symbol;Acc:MGI:2384904]
ENSMUST00000139954	258.878	-0.052448	0.120094	-0.436724	0.662312	0.866658	239.945	258.381	263.217	283.661	256.704	251.36	Mfsd11	ENSMUSG00000020818	major facilitator superfamily domain containing 11 [Source:MGI Symbol;Acc:MGI:1917150]
ENSMUST00000034467	158.132	-0.0725121	0.166637	-0.435149	0.663454	0.867653	191.417	136.896	135.166	165.985	135.902	183.425	Sprtn	ENSMUSG00000031986	SprT-like N-terminal domain [Source:MGI Symbol;Acc:MGI:2685351]
ENSMUST00000028897	138.649	0.0695984	0.160926	0.432488	0.665387	0.869679	123.118	155.935	146.726	121.392	155.649	129.077	Cpxm1	ENSMUSG00000027408	carboxypeptidase X 1 (M14 family) [Source:MGI Symbol;Acc:MGI:1934569]
ENSMUST00000176526	87.4029	0.0836799	0.193756	0.431883	0.665827	0.869753	87.1711	83.4071	100.485	76.7991	75.5013	101.054	Tmem240	ENSMUSG00000084845	transmembrane protein 240 [Source:MGI Symbol;Acc:MGI:3648074]
ENSMUST00000019638	212.059	-0.0634131	0.147327	-0.430424	0.666887	0.870136	169.849	233.902	216.976	221.726	243.927	185.973	Cops6	ENSMUSG00000019494	COP9 signalosome subunit 6 [Source:MGI Symbol;Acc:MGI:1349439]
ENSMUST00000133363	88.5586	-0.0832487	0.193252	-0.430778	0.66663	0.870136	75.4883	95.1929	86.2569	96.6182	102.217	75.578	Gm11867	ENSMUSG00000087402	predicted gene 11867 [Source:MGI Symbol;Acc:MGI:3650506]
ENSMUST00000098104	4438.14	0.0308905	0.0719872	0.429111	0.667843	0.870404	4401.69	4572.88	4479.14	4661.21	4395.34	4118.57	Cd72	ENSMUSG00000028459	CD72 antigen [Source:MGI Symbol;Acc:MGI:88345]
ENSMUST00000189675	115.354	0.0778479	0.18165	0.428561	0.668243	0.870404	123.118	132.363	98.7064	111.483	134.741	91.7126	Gm28529	ENSMUSG00000101320	predicted gene 28529 [Source:MGI Symbol;Acc:MGI:5579235]
ENSMUST00000223605	113.614	-0.0824038	0.192104	-0.428955	0.667956	0.870404	85.3737	138.71	105.82	130.063	126.61	95.1094	Gm48732	ENSMUSG00000114568	predicted gene, 48732 [Source:MGI Symbol;Acc:MGI:6098394]
ENSMUST00000001818	96.1229	0.0831985	0.194763	0.427178	0.66925	0.87046	98.8538	87.9401	111.156	94.1409	70.8551	113.792	Crnkl1	ENSMUSG00000001767	crooked neck pre-mRNA splicing factor 1 [Source:MGI Symbol;Acc:MGI:1914127]
ENSMUST00000123610	533.259	-0.0428888	0.10054	-0.426587	0.669681	0.87046	488.877	542.146	542.44	578.471	561.033	486.586	Prkag2os2	ENSMUSG00000087314	protein kinase, AMP-activated, gamma 2 non-catalytic subunit, opposite strand 2 [Source:MGI Symbol;Acc:MGI:3783001]
ENSMUST00000224024	1282.53	0.0366962	0.085927	0.427063	0.669334	0.87046	1300.38	1411.57	1182.7	1299.39	1311.4	1189.72	4921520N01Rik	ENSMUSG00000114342	RIKEN cDNA 4921520N01 gene [Source:MGI Symbol;Acc:MGI:1918166]
ENSMUST00000224483	164.548	0.0631458	0.148093	0.426394	0.669821	0.87046	162.659	185.853	154.729	165.985	175.395	142.664	4933433G19Rik	ENSMUSG00000114362	RIKEN cDNA 4933433G19 gene [Source:MGI Symbol;Acc:MGI:1918476]
ENSMUST00000185944	329.013	-0.0471964	0.111159	-0.424585	0.671139	0.871674	333.407	325.469	311.236	365.415	312.459	326.089	1700088E04Rik	ENSMUSG00000033029	RIKEN cDNA 1700088E04 gene [Source:MGI Symbol;Acc:MGI:1920774]
ENSMUST00000210011	69.5021	0.088033	0.207922	0.423395	0.672007	0.872302	64.7043	71.6213	78.2537	74.3217	62.7242	65.3877	Gm2516	ENSMUSG00000110281	predicted gene 2516 [Source:MGI Symbol;Acc:MGI:3780683]
ENSMUST00000194679	72.0418	0.0936483	0.221557	0.422682	0.672527	0.872478	78.1844	61.6487	81.8107	82.9926	76.6629	50.9514	Gm37651	ENSMUSG00000103734	predicted gene, 37651 [Source:MGI Symbol;Acc:MGI:5610879]
ENSMUST00000205549	187.642	-0.0570532	0.1354	-0.421368	0.673486	0.873223	182.43	171.347	198.302	193.236	183.526	197.012	Gm44981	ENSMUSG00000108574	predicted gene 44981 [Source:MGI Symbol;Acc:MGI:5753557]
ENSMUST00000003659	204.408	0.0550146	0.131775	0.417488	0.676321	0.873682	215.681	206.705	203.637	200.669	182.365	217.393	Comp	ENSMUSG00000031849	cartilage oligomeric matrix protein [Source:MGI Symbol;Acc:MGI:88469]
ENSMUST00000028378	65.333	0.0957102	0.228688	0.418519	0.675568	0.873682	66.5016	55.3025	81.8107	54.5026	55.7548	78.1255	Galnt3	ENSMUSG00000026994	polypeptide N-acetylgalactosaminyltransferase 3 [Source:MGI Symbol;Acc:MGI:894695]
ENSMUST00000031838	67.4246	0.0872464	0.209126	0.417196	0.676535	0.873682	75.4883	67.0883	65.8043	61.9348	69.6935	64.5385	Igf2bp3	ENSMUSG00000029814	insulin-like growth factor 2 mRNA binding protein 3 [Source:MGI Symbol;Acc:MGI:1890359]
ENSMUST00000098545	165.281	-0.0595568	0.142232	-0.418729	0.675414	0.873682	150.977	173.16	160.954	177.133	167.264	162.195	Tlcd1	ENSMUSG00000019437	TLC domain containing 1 [Source:MGI Symbol;Acc:MGI:1915572]
ENSMUST00000105439	140.288	-0.064742	0.154056	-0.420251	0.674302	0.873682	131.206	132.363	146.726	154.837	147.518	129.077	Lrrtm3	ENSMUSG00000042846	leucine rich repeat transmembrane neuronal 3 [Source:MGI Symbol;Acc:MGI:2389177]
ENSMUST00000143949	332.595	-0.0474503	0.113485	-0.418118	0.675861	0.873682	317.231	350.854	312.126	374.086	319.429	321.843	4921518K17Rik	ENSMUSG00000085851	RIKEN cDNA 4921518K17 gene [Source:MGI Symbol;Acc:MGI:1926008]
ENSMUST00000202534	184.53	0.0595009	0.141781	0.419669	0.674727	0.873682	173.443	203.078	187.631	206.862	163.78	172.386	Gm43808	ENSMUSG00000107086	predicted gene 43808 [Source:MGI Symbol;Acc:MGI:5663945]
ENSMUST00000219985	70.8064	0.0895472	0.215202	0.416107	0.677331	0.874212	58.4136	87.0335	72.9182	76.7991	68.532	61.1417	Gm18876	ENSMUSG00000112098	predicted gene, 18876 [Source:MGI Symbol;Acc:MGI:5011061]
ENSMUST00000033056	94.6603	-0.0779472	0.188369	-0.4138	0.67902	0.875894	77.2857	111.512	87.1462	101.573	98.7325	91.7126	Pycard	ENSMUSG00000030793	PYD and CARD domain containing [Source:MGI Symbol;Acc:MGI:1931465]
ENSMUST00000075775	167.405	0.0593567	0.14369	0.41309	0.679541	0.876067	187.822	155.935	168.068	168.463	169.588	154.553	Rex2	ENSMUSG00000067919	reduced expression 2 [Source:MGI Symbol;Acc:MGI:1328322]
ENSMUST00000235397	79.765	-0.0834173	0.202229	-0.412488	0.679982	0.876137	86.2724	73.4345	73.8075	78.0378	68.532	98.5061	AC166172.1	ENSMUSG00000118071	novel transcript, antisense to Pknox1
ENSMUST00000189873	94.5842	0.0744434	0.180889	0.411541	0.680676	0.876534	100.651	97.9127	93.3709	89.1861	83.6322	102.752	Gm28667	ENSMUSG00000099657	predicted gene 28667 [Source:MGI Symbol;Acc:MGI:5579373]
ENSMUST00000143765	88.5992	0.0794483	0.19365	0.410269	0.681609	0.877028	94.3604	96.0995	81.8107	81.7539	104.54	73.0304	Gm15884	ENSMUSG00000087327	predicted gene 15884 [Source:MGI Symbol;Acc:MGI:3801897]
ENSMUST00000153438	337.234	-0.0470656	0.114804	-0.409964	0.681832	0.877028	358.57	336.348	298.787	369.131	343.821	316.748	Cntd1	ENSMUSG00000078653	cyclin N-terminal domain containing 1 [Source:MGI Symbol;Acc:MGI:1923965]
ENSMUST00000130021	994.329	0.0377102	0.0928179	0.406282	0.684536	0.878513	1057.74	1065.25	898.139	938.931	1070.96	934.959	Gm14199	ENSMUSG00000089898	predicted gene 14199 [Source:MGI Symbol;Acc:MGI:3651370]
ENSMUST00000136146	77.1545	0.0816844	0.200288	0.407834	0.683396	0.878513	80.8804	77.0609	80.9215	60.6961	80.1476	83.2207	Fam45a	ENSMUSG00000024993	family with sequence similarity 45, member A [Source:MGI Symbol;Acc:MGI:1915144]
ENSMUST00000197572	458.128	-0.0425194	0.104515	-0.406828	0.684134	0.878513	425.97	488.657	437.509	485.569	489.016	422.048	Gm42457	ENSMUSG00000105339	predicted gene 42457 [Source:MGI Symbol;Acc:MGI:5662594]
ENSMUST00000233199	68.4619	0.15596	0.383426	0.406754	0.684189	0.878513	59.3123	61.6487	96.0386	65.6509	40.6546	87.4666	Gm9805	ENSMUSG00000117055	predicted gene 9805 [Source:MGI Symbol;Acc:MGI:3642566]
ENSMUST00000025786	68.1225	0.0851656	0.210793	0.404025	0.686194	0.87915	62.907	69.8081	78.2537	63.1735	61.5626	73.0304	Pacs1	ENSMUSG00000024855	phosphofurin acidic cluster sorting protein 1 [Source:MGI Symbol;Acc:MGI:1277113]
ENSMUST00000177894	234.477	0.0505308	0.125013	0.404204	0.686063	0.87915	239.945	222.117	253.435	244.023	217.211	230.131	Gm20797	ENSMUSG00000096890	predicted gene, 20797 [Source:MGI Symbol;Acc:MGI:5434153]
ENSMUST00000234040	157.097	-0.0674573	0.166682	-0.404706	0.685694	0.87915	170.747	172.254	116.491	185.804	148.68	148.608	Gm26885	ENSMUSG00000097125	predicted gene, 26885 [Source:MGI Symbol;Acc:MGI:5477379]
ENSMUST00000018851	2547.61	0.0280549	0.0699388	0.401135	0.688321	0.879654	2618.73	2440.56	2657.96	2552.95	2472.96	2542.48	Dync1h1	ENSMUSG00000018707	dynein cytoplasmic 1 heavy chain 1 [Source:MGI Symbol;Acc:MGI:103147]
ENSMUST00000084299	98.8102	-0.0770376	0.192483	-0.400231	0.688987	0.879654	82.6777	96.0995	111.156	79.2765	102.217	121.434	Akirin2	ENSMUSG00000028291	akirin 2 [Source:MGI Symbol;Acc:MGI:1889364]
ENSMUST00000096608	124.397	0.131266	0.327771	0.400481	0.688802	0.879654	124.017	99.7259	167.178	104.05	91.7631	159.648	Mroh9	ENSMUSG00000071890	maestro heat-like repeat family member 9 [Source:MGI Symbol;Acc:MGI:1925508]
ENSMUST00000131736	62.8383	0.0903103	0.226921	0.397981	0.690644	0.879654	63.8056	66.1817	63.1365	76.7991	60.4011	46.7055	4930404N11Rik	ENSMUSG00000020234	RIKEN cDNA 4930404N11 gene [Source:MGI Symbol;Acc:MGI:1921072]
ENSMUST00000147133	353.011	-0.0512081	0.127542	-0.401499	0.688053	0.879654	308.244	407.969	324.575	312.151	404.222	360.906	Sp9	ENSMUSG00000068859	trans-acting transcription factor 9 [Source:MGI Symbol;Acc:MGI:3574660]
ENSMUST00000149224	739.248	0.0419482	0.105031	0.399387	0.689608	0.879654	625.475	815.032	808.325	775.423	713.197	698.035	D430040D24Rik	ENSMUSG00000087589	RIKEN cDNA D430040D24 gene [Source:MGI Symbol;Acc:MGI:2442526]
ENSMUST00000188089	335.609	-0.0476182	0.119734	-0.397699	0.690852	0.879654	378.34	319.123	291.673	346.835	360.083	317.597	Gm29585	ENSMUSG00000100548	predicted gene 29585 [Source:MGI Symbol;Acc:MGI:5580291]
ENSMUST00000192969	336.956	0.0529006	0.132706	0.39863	0.690165	0.879654	336.103	414.316	280.113	301.003	340.337	349.867	Lman2l	ENSMUSG00000001143	lectin, mannose-binding 2-like [Source:MGI Symbol;Acc:MGI:2443010]
ENSMUST00000203352	446.886	-0.0424197	0.105286	-0.402898	0.687023	0.879654	400.807	446.047	472.19	476.898	469.27	416.103	4933406J09Rik	ENSMUSG00000107666	RIKEN cDNA 4933406J09 gene [Source:MGI Symbol;Acc:MGI:1921314]
ENSMUST00000220021	67.2661	0.0886295	0.22172	0.399736	0.689351	0.879654	65.603	77.0609	64.0258	76.7991	70.8551	49.2531	Gm47862	ENSMUSG00000111943	predicted gene, 47862 [Source:MGI Symbol;Acc:MGI:6097078]
ENSMUST00000227190	102.723	0.0805706	0.202259	0.398353	0.69037	0.879654	84.4751	131.457	99.5956	101.573	121.964	77.2764	Gm9502	ENSMUSG00000114977	predicted gene 9502 [Source:MGI Symbol;Acc:MGI:3779912]
ENSMUST00000021204	180.709	-0.0539708	0.136161	-0.396375	0.691829	0.880403	186.924	169.534	176.071	177.133	183.526	191.068	Nxn	ENSMUSG00000020844	nucleoredoxin [Source:MGI Symbol;Acc:MGI:109331]
ENSMUST00000183300	66.5974	-0.0842587	0.213133	-0.395335	0.692596	0.880886	73.691	55.3025	64.915	71.8443	65.0473	68.7844	Gm27004	ENSMUSG00000098027	predicted gene, 27004 [Source:MGI Symbol;Acc:MGI:5504119]
ENSMUST00000001712	68.2762	-0.0833755	0.21335	-0.390791	0.695952	0.880929	58.4136	77.9675	63.1365	68.1282	63.8857	78.1255	Cabin1	ENSMUSG00000020196	calcineurin binding protein 1 [Source:MGI Symbol;Acc:MGI:1298375]
ENSMUST00000011493	157.796	-0.0592832	0.150396	-0.39418	0.693448	0.880929	168.051	149.589	147.615	147.405	149.841	184.274	Dmrtc2	ENSMUSG00000011349	doublesex and mab-3 related transcription factor like family C2 [Source:MGI Symbol;Acc:MGI:1918491]
ENSMUST00000036383	241.425	-0.0498055	0.126567	-0.393511	0.693942	0.880929	261.513	213.957	236.54	230.397	259.028	247.114	Dnali1	ENSMUSG00000042707	dynein, axonemal, light intermediate polypeptide 1 [Source:MGI Symbol;Acc:MGI:1922813]
ENSMUST00000036862	121.41	-0.0647551	0.166698	-0.388458	0.697677	0.880929	131.206	100.632	123.605	125.108	132.418	115.49	Cog5	ENSMUSG00000035933	component of oligomeric golgi complex 5 [Source:MGI Symbol;Acc:MGI:2145130]
ENSMUST00000038252	554.012	-0.0380407	0.0978224	-0.388875	0.697368	0.880929	513.141	550.305	576.232	526.446	614.465	543.482	B3galt2	ENSMUSG00000033849	UDP-Gal:betaGlcNAc beta 1,3-galactosyltransferase, polypeptide 2 [Source:MGI Symbol;Acc:MGI:1349461]
ENSMUST00000043237	136.9	0.117478	0.299151	0.392703	0.694539	0.880929	142.889	93.3797	191.188	123.87	135.902	134.172	Trp53inp2	ENSMUSG00000038375	transformation related protein 53 inducible nuclear protein 2 [Source:MGI Symbol;Acc:MGI:1915978]
ENSMUST00000060835	113.029	0.0696119	0.178605	0.389754	0.696718	0.880929	115.929	119.671	112.045	84.2313	135.902	110.395	Tex14	ENSMUSG00000010342	testis expressed gene 14 [Source:MGI Symbol;Acc:MGI:1933227]
ENSMUST00000064016	66.0521	0.0910392	0.232702	0.391226	0.69563	0.880929	88.0697	58.9289	56.9118	58.2187	78.986	55.1974	Gpr17	ENSMUSG00000052229	G protein-coupled receptor 17 [Source:MGI Symbol;Acc:MGI:3584514]
ENSMUST00000080288	79.3543	-0.0796605	0.204672	-0.38921	0.697121	0.880929	72.7923	62.5553	96.0386	84.2313	78.986	81.5223	Prr19	ENSMUSG00000058741	proline rich 19 [Source:MGI Symbol;Acc:MGI:3648539]
ENSMUST00000143135	235.46	-0.0504767	0.128658	-0.392334	0.694812	0.880929	208.492	252.034	232.983	229.159	262.512	227.583	Gm15592	ENSMUSG00000087389	predicted gene 15592 [Source:MGI Symbol;Acc:MGI:3783039]
ENSMUST00000147724	127.843	0.0693244	0.178293	0.388823	0.697407	0.880929	140.193	156.842	96.0386	117.676	128.933	127.379	Tcp1	ENSMUSG00000068039	t-complex protein 1 [Source:MGI Symbol;Acc:MGI:98535]
ENSMUST00000194588	108.029	-0.0666482	0.169345	-0.393564	0.693903	0.880929	110.537	103.352	103.153	100.334	116.156	114.641	Gm37342	ENSMUSG00000102732	predicted gene, 37342 [Source:MGI Symbol;Acc:MGI:5610570]
ENSMUST00000229937	76.5168	0.0784529	0.201557	0.389234	0.697103	0.880929	74.5897	72.5279	88.0354	85.47	69.6935	68.7844	Gm8375	ENSMUSG00000116127	predicted gene 8375 [Source:MGI Symbol;Acc:MGI:3644819]
ENSMUST00000048044	67.86	-0.0812126	0.210937	-0.385009	0.700231	0.88268	62.907	72.5279	63.1365	66.8896	62.7242	78.9747	Trub2	ENSMUSG00000039826	TruB pseudouridine (psi) synthase family member 2 [Source:MGI Symbol;Acc:MGI:2442186]
ENSMUST00000094787	103.534	0.0694042	0.180219	0.385111	0.700155	0.88268	123.118	90.6599	104.931	100.334	91.7631	110.395	Slc34a2	ENSMUSG00000029188	solute carrier family 34 (sodium phosphate), member 2 [Source:MGI Symbol;Acc:MGI:1342284]
ENSMUST00000167377	95.9443	0.130152	0.337706	0.3854	0.699941	0.88268	95.2591	64.3685	141.39	82.9926	90.6016	101.054	Iqgap1	ENSMUSG00000030536	IQ motif containing GTPase activating protein 1 [Source:MGI Symbol;Acc:MGI:1352757]
ENSMUST00000020420	83.9341	0.0759224	0.198472	0.382535	0.702065	0.883453	70.0963	86.1269	102.263	86.7087	74.3398	84.0699	Ap3d1	ENSMUSG00000020198	adaptor-related protein complex 3, delta 1 subunit [Source:MGI Symbol;Acc:MGI:107734]
ENSMUST00000034138	72.7339	0.0790428	0.206748	0.382314	0.702228	0.883453	73.691	64.3685	86.2569	74.3217	63.8857	73.8796	Dnaja2	ENSMUSG00000031701	DnaJ heat shock protein family (Hsp40) member A2 [Source:MGI Symbol;Acc:MGI:1931882]
ENSMUST00000111607	645.326	0.0390144	0.101858	0.383027	0.7017	0.883453	594.92	747.037	618.916	650.315	662.088	598.679	Far2	ENSMUSG00000030303	fatty acyl CoA reductase 2 [Source:MGI Symbol;Acc:MGI:2687035]
ENSMUST00000211845	117.131	-0.0723504	0.189359	-0.382081	0.702401	0.883453	143.787	116.951	81.8107	111.483	132.418	116.339	Spata2l	ENSMUSG00000033594	spermatogenesis associated 2-like [Source:MGI Symbol;Acc:MGI:1926029]
ENSMUST00000036044	63.1595	-0.0939619	0.246618	-0.381002	0.703202	0.88397	60.2109	51.6761	72.9182	54.5026	48.7855	90.8634	Zfc3h1	ENSMUSG00000034163	zinc finger, C3H1-type containing [Source:MGI Symbol;Acc:MGI:2446143]
ENSMUST00000049308	237.734	0.0459254	0.121408	0.378272	0.705229	0.885536	243.54	247.501	233.872	227.92	235.796	237.773	Itpr3	ENSMUSG00000042644	inositol 1,4,5-triphosphate receptor 3 [Source:MGI Symbol;Acc:MGI:96624]
ENSMUST00000192961	78.9881	-0.0769895	0.203401	-0.378512	0.705051	0.885536	82.6777	86.1269	62.2473	69.3669	89.44	84.0699	Cep170	ENSMUSG00000057335	centrosomal protein 170 [Source:MGI Symbol;Acc:MGI:1918348]
ENSMUST00000118575	138.902	-0.0581045	0.154047	-0.377186	0.706035	0.885763	129.409	146.869	132.498	147.405	127.771	149.458	Gm16066	ENSMUSG00000082848	predicted gene 16066 [Source:MGI Symbol;Acc:MGI:3801953]
ENSMUST00000174654	62.8206	-0.0831751	0.220636	-0.376978	0.70619	0.885763	59.3123	71.6213	52.4656	58.2187	67.3704	67.9353	Gm20470	ENSMUSG00000092190	predicted gene 20470 [Source:MGI Symbol;Acc:MGI:5141935]
ENSMUST00000033070	62.5102	0.082803	0.220263	0.375927	0.706971	0.885763	59.3123	60.7421	72.9182	53.2639	68.532	60.2925	Kat8	ENSMUSG00000030801	K(lysine) acetyltransferase 8 [Source:MGI Symbol;Acc:MGI:1915023]
ENSMUST00000192299	142.287	-0.0579561	0.154141	-0.375994	0.706921	0.885763	129.409	151.402	136.944	162.269	133.579	140.116	E330040D14Rik	ENSMUSG00000104025	RIKEN cDNA E330040D14 gene [Source:MGI Symbol;Acc:MGI:3649088]
ENSMUST00000020986	83.9905	0.148556	0.395955	0.375185	0.707523	0.885966	113.233	50.7695	101.374	63.1735	74.3398	101.054	Dnajc27	ENSMUSG00000020657	DnaJ heat shock protein family (Hsp40) member C27 [Source:MGI Symbol;Acc:MGI:2443036]
ENSMUST00000002397	73.9853	0.0777711	0.209097	0.371938	0.709939	0.887711	80.8804	85.2203	61.358	70.6056	81.3091	64.5385	Gmpr2	ENSMUSG00000002326	guanosine monophosphate reductase 2 [Source:MGI Symbol;Acc:MGI:1917903]
ENSMUST00000129758	184.596	-0.053401	0.143636	-0.37178	0.710057	0.887711	175.241	200.358	168.068	164.746	214.888	184.274	Smim27	ENSMUSG00000028407	small integral membrane protein 27 [Source:MGI Symbol;Acc:MGI:1913684]
ENSMUST00000218530	108.705	0.0638272	0.171701	0.371734	0.710091	0.887711	120.422	106.979	105.82	96.6182	119.641	102.752	Gm48045	ENSMUSG00000111905	predicted gene, 48045 [Source:MGI Symbol;Acc:MGI:6097362]
ENSMUST00000206389	63.7411	0.0825979	0.223046	0.370317	0.711146	0.888052	79.9817	55.3025	61.358	56.98	68.532	60.2925	Aqp11	ENSMUSG00000042797	aquaporin 11 [Source:MGI Symbol;Acc:MGI:1913583]
ENSMUST00000234807	868.963	-0.0341364	0.0920722	-0.370756	0.710819	0.888052	838.46	928.357	807.436	867.087	960.609	811.826	Gm50011	ENSMUSG00000117457	predicted gene, 50011 [Source:MGI Symbol;Acc:MGI:6275299]
ENSMUST00000147937	71.2503	-0.081117	0.219676	-0.369258	0.711936	0.888549	80.8804	65.2751	60.4688	92.9022	68.532	59.4433	1700051A21Rik	ENSMUSG00000086951	RIKEN cDNA 1700051A21 gene [Source:MGI Symbol;Acc:MGI:1920616]
ENSMUST00000020413	223.247	0.0877468	0.238226	0.368335	0.712624	0.888919	275.892	182.226	232.983	178.372	206.757	263.249	Zpbp	ENSMUSG00000020193	zona pellucida binding protein [Source:MGI Symbol;Acc:MGI:1855701]
ENSMUST00000224604	62.3589	0.0823014	0.224025	0.367376	0.713339	0.889322	66.5016	64.3685	60.4688	74.3217	59.2395	49.2531	Gm31219	ENSMUSG00000114242	predicted gene, 31219 [Source:MGI Symbol;Acc:MGI:5590378]
ENSMUST00000138617	281.869	0.0424978	0.115859	0.366805	0.713765	0.889364	271.399	282.859	303.233	274.99	290.39	268.344	Atxn7l1os2	ENSMUSG00000085664	ataxin 7-like 1, opposite strand 2 [Source:MGI Symbol;Acc:MGI:1923086]
ENSMUST00000032561	64.7923	0.0802687	0.2206	0.363866	0.715958	0.891425	53.9202	77.0609	69.3612	55.7413	63.8857	68.7844	Vasp	ENSMUSG00000030403	vasodilator-stimulated phosphoprotein [Source:MGI Symbol;Acc:MGI:109268]
ENSMUST00000124738	304.337	-0.0407845	0.112188	-0.363537	0.716204	0.891425	289.372	316.403	294.341	297.287	322.913	305.709	Gm12992	ENSMUSG00000085667	predicted gene 12992 [Source:MGI Symbol;Acc:MGI:3702644]
ENSMUST00000151913	101.972	0.0710731	0.197497	0.359869	0.718945	0.894346	133.902	87.0335	93.3709	101.573	81.3091	114.641	Rfx8	ENSMUSG00000057173	regulatory factor X 8 [Source:MGI Symbol;Acc:MGI:3588206]
ENSMUST00000026273	150.163	0.0539384	0.151419	0.35622	0.721676	0.894362	144.686	173.16	140.501	152.36	151.003	139.267	Slc6a20b	ENSMUSG00000025243	solute carrier family 6 (neurotransmitter transporter), member 20B [Source:MGI Symbol;Acc:MGI:1336891]
ENSMUST00000026560	74.5032	-0.07511	0.209161	-0.359102	0.719519	0.894362	73.691	71.6213	73.8075	61.9348	70.8551	95.1094	Psmd13	ENSMUSG00000025487	proteasome (prosome, macropain) 26S subunit, non-ATPase, 13 [Source:MGI Symbol;Acc:MGI:1345192]
ENSMUST00000033006	86.7923	0.0700036	0.195586	0.357918	0.720405	0.894362	81.779	84.3137	101.374	87.9474	68.532	96.8077	Nsmce1	ENSMUSG00000030750	NSE1 homolog, SMC5-SMC6 complex component [Source:MGI Symbol;Acc:MGI:1914961]
ENSMUST00000041606	2970.46	-0.0276886	0.0776034	-0.356797	0.721244	0.894362	2801.16	3189.41	2833.14	3132.66	3025.86	2840.54	Necab1	ENSMUSG00000040536	N-terminal EF-hand calcium binding protein 1 [Source:MGI Symbol;Acc:MGI:1916602]
ENSMUST00000124471	168.723	0.0926912	0.259472	0.35723	0.72092	0.894362	171.646	209.424	140.501	172.179	196.303	122.283	Gm12999	ENSMUSG00000087352	predicted gene 12999 [Source:MGI Symbol;Acc:MGI:3651167]
ENSMUST00000126677	98.5537	0.0704116	0.196531	0.358273	0.720139	0.894362	111.435	98.8193	93.3709	110.244	66.2088	111.244	Gm15537	ENSMUSG00000085048	predicted gene 15537 [Source:MGI Symbol;Acc:MGI:3782985]
ENSMUST00000220773	68.6299	0.0774349	0.217413	0.356165	0.721717	0.894362	53.9202	82.5005	74.6967	68.1282	69.6935	62.8401	Gm30302	ENSMUSG00000114073	predicted gene, 30302 [Source:MGI Symbol;Acc:MGI:5589461]
ENSMUST00000180981	197.995	-0.047121	0.1325	-0.35563	0.722118	0.894369	180.633	209.424	193.856	203.146	205.596	195.314	Gm26642	ENSMUSG00000097680	predicted gene, 26642 [Source:MGI Symbol;Acc:MGI:5477136]
ENSMUST00000191315	95.7593	0.0698266	0.197048	0.354363	0.723067	0.895057	115.03	108.792	70.2505	97.8569	91.7631	90.8634	Gm28306	ENSMUSG00000101711	predicted gene 28306 [Source:MGI Symbol;Acc:MGI:5579012]
ENSMUST00000178699	231.016	0.0451972	0.127986	0.353143	0.723982	0.895458	226.465	253.848	223.201	214.294	250.897	217.393	Gm21844	ENSMUSG00000095913	predicted gene, 21844 [Source:MGI Symbol;Acc:MGI:5434008]
ENSMUST00000192644	101.268	-0.0668593	0.189752	-0.352351	0.724575	0.895458	99.7525	111.512	84.4784	100.334	126.61	84.9191	Gm37539	ENSMUSG00000102299	predicted gene, 37539 [Source:MGI Symbol;Acc:MGI:5610767]
ENSMUST00000222936	100.567	0.063755	0.180817	0.352594	0.724393	0.895458	121.321	97.0061	89.8139	99.0956	101.056	95.1094	Gm47003	ENSMUSG00000113816	predicted gene, 47003 [Source:MGI Symbol;Acc:MGI:6095679]
ENSMUST00000002305	84.7189	-0.0751662	0.213974	-0.351287	0.725373	0.895469	76.387	87.0335	82.6999	121.392	72.0166	68.7844	Kdm7a	ENSMUSG00000042599	lysine (K)-specific demethylase 7A [Source:MGI Symbol;Acc:MGI:2443388]
ENSMUST00000224703	64.9413	0.0830031	0.236068	0.351606	0.725134	0.895469	68.299	54.3959	76.4752	85.47	55.7548	49.2531	Slc38a9	ENSMUSG00000047789	solute carrier family 38, member 9 [Source:MGI Symbol;Acc:MGI:1918839]
ENSMUST00000007449	140.61	-0.0549325	0.157117	-0.349627	0.726619	0.896032	139.294	131.457	142.279	168.463	125.448	136.72	Akr1b7	ENSMUSG00000052131	aldo-keto reductase family 1, member B7 [Source:MGI Symbol;Acc:MGI:101918]
ENSMUST00000008537	86.7726	0.0655167	0.187142	0.350091	0.72627	0.896032	84.4751	89.7533	91.5924	81.7539	94.0863	78.9747	Carhsp1	ENSMUSG00000008393	calcium regulated heat stable protein 1 [Source:MGI Symbol;Acc:MGI:1196368]
ENSMUST00000025864	266.192	-0.0432573	0.125167	-0.345597	0.729646	0.89684	235.452	297.364	254.325	251.455	283.42	275.138	Rnaseh2c	ENSMUSG00000024925	ribonuclease H2, subunit C [Source:MGI Symbol;Acc:MGI:1915459]
ENSMUST00000033049	99.4772	-0.0605979	0.174035	-0.348194	0.727694	0.89684	97.9551	95.1929	98.7064	102.812	104.54	97.6569	Cox6a2	ENSMUSG00000030785	cytochrome c oxidase subunit 6A2 [Source:MGI Symbol;Acc:MGI:104649]
ENSMUST00000100775	99.3109	0.0615763	0.178002	0.34593	0.729395	0.89684	99.7525	99.7259	104.042	95.3795	110.348	86.6174	Rad1	ENSMUSG00000022248	RAD1 checkpoint DNA exonuclease [Source:MGI Symbol;Acc:MGI:1316678]
ENSMUST00000120717	75.1976	-0.0700097	0.202489	-0.345746	0.729534	0.89684	70.0963	79.7807	70.2505	66.8896	89.44	74.7288	Capn11	ENSMUSG00000058626	calpain 11 [Source:MGI Symbol;Acc:MGI:1352490]
ENSMUST00000185303	93.278	-0.0644757	0.186262	-0.346155	0.729226	0.89684	90.7657	105.165	77.3645	94.1409	102.217	90.0142	Gm28370	ENSMUSG00000099478	predicted gene 28370 [Source:MGI Symbol;Acc:MGI:5579076]
ENSMUST00000202719	68.8971	-0.0720645	0.207366	-0.347523	0.728199	0.89684	62.907	74.3411	64.0258	71.8443	73.1782	67.0861	Gm6598	ENSMUSG00000107143	predicted gene 6598 [Source:MGI Symbol;Acc:MGI:3646314]
ENSMUST00000023452	113.971	0.0616577	0.178881	0.344686	0.73033	0.8971	111.435	135.99	100.485	126.347	116.156	93.411	Ccdc116	ENSMUSG00000022768	coiled-coil domain containing 116 [Source:MGI Symbol;Acc:MGI:1924122]
ENSMUST00000068999	64.773	0.0745521	0.216555	0.344264	0.730648	0.8971	58.4136	77.9675	63.1365	60.6961	63.8857	64.5385	Micu3	ENSMUSG00000039478	mitochondrial calcium uptake family, member 3 [Source:MGI Symbol;Acc:MGI:1925756]
ENSMUST00000028341	118.775	0.0593866	0.17364	0.34201	0.732344	0.897724	111.435	133.27	120.048	90.4248	130.095	127.379	Anapc2	ENSMUSG00000026965	anaphase promoting complex subunit 2 [Source:MGI Symbol;Acc:MGI:2139135]
ENSMUST00000055557	192.174	0.0461203	0.134784	0.342179	0.732216	0.897724	206.694	185.853	192.077	200.669	192.819	174.933	Stx19	ENSMUSG00000047854	syntaxin 19 [Source:MGI Symbol;Acc:MGI:1915409]
ENSMUST00000132128	117.194	0.0576783	0.168354	0.342601	0.731899	0.897724	138.395	111.512	108.488	112.721	120.802	111.244	Ndor1	ENSMUSG00000006471	NADPH dependent diflavin oxidoreductase 1 [Source:MGI Symbol;Acc:MGI:1926047]
ENSMUST00000029240	72.9299	0.0719734	0.211333	0.340569	0.733428	0.898569	70.995	91.5665	61.358	73.083	74.3398	66.2369	Slc2a2	ENSMUSG00000027690	solute carrier family 2 (facilitated glucose transporter), member 2 [Source:MGI Symbol;Acc:MGI:1095438]
ENSMUST00000184692	90.9096	0.10356	0.305375	0.339125	0.734516	0.89893	69.1976	95.1929	117.381	96.6182	103.379	63.6893	Gm5118	ENSMUSG00000098854	predicted gene 5118 [Source:MGI Symbol;Acc:MGI:3645880]
ENSMUST00000217491	71.3761	0.0703309	0.207272	0.339317	0.734371	0.89893	77.2857	80.6873	61.358	73.083	66.2088	69.6336	Gm47112	ENSMUSG00000111079	predicted gene, 47112 [Source:MGI Symbol;Acc:MGI:6095853]
[truncated: 43,523 more rows]

## Sheet: P<0.05, |FC|>1
Transcript.stable.ID	baseMean	log2FoldChange	lfcSE	stat	pvalue	padj	MR1	MR2	MR3	WR1	WR2	WR3	Gene.name	Gene.stable.ID	Gene.description
[truncated: 2 more rows]
