# Supplementary material for: Targeted mRNP-phagy licenses translational activation during cellular metamorphosis
Source: Research Square preprint supplement (doi:10.21203/rs.3.rs-6289188/v1), 2025-05-06
Supplement: Supplementary file 9 [file aed46d9b580c0eed9771c77b.xlsx]

## Sheet: merge
Abundances (Grouped): F1, 126	Abundances (Grouped): F1, 127	Abundances (Grouped): F1, 128	Abundances (Grouped): F1, 129	Abundances (Grouped): F1, 130	Abundances (Grouped): F1, 131	Accession	Description	Coverage [%]	# Peptides	# PSMs	# Unique Peptides	# AAs	MW [kDa]	calc. pI	Abundance: F1: 126, Sample	Abundance: F1: 127, Sample	Abundance: F1: 128, Sample	Abundance: F1: 129, Sample	Abundance: F1: 130, Sample	Abundance: F1: 131, Sample
194.6	194.9	143.8	19.9	20.4	26.2	D3YTR2	Receptor expression-enhancing protein 6 OS=Mus musculus OX=10090 GN=Reep6 PE=4 SV=1	29	10	11	10	572	60.5	11.69	30.8	32.2	22.1	2.9	3	3.7
	Abundances (Grouped): F1, 126	Abundances (Grouped): F1, 127	Abundances (Grouped): F1, 128	Abundances (Grouped): F1, 129	Abundances (Grouped): F1, 130	Abundances (Grouped): F1, 131	Annotated Sequence	Modifications	# Protein Groups	# Proteins	# PSMs	Master Protein Accessions	Positions in Master Proteins	Modifications in Master Proteins	# Missed Cleavages	Theo. MH+ [Da]	Abundance: F1: 126, Sample	Abundance: F1: 127, Sample	Abundance: F1: 128, Sample	Abundance: F1: 129, Sample	Abundance: F1: 130, Sample	Abundance: F1: 131, Sample	Charge (by Search Engine): Sequest HT	DeltaM [ppm] (by Search Engine): Sequest HT	RT [min] (by Search Engine): Sequest HT
							[R].SAAAATASAAAPAAPAAPAAAAPAATTAPTSTQR.[V]	1xTMT6plex [N-Term]	1	2	1	D3YTR2	D3YTR2 [439-472]		0	3133.64							4	3.12	45.7109
							[K].TPLQPQPQPQPQPQPQPQPQPQPQPQRR.[T]	1xTMT6plex [N-Term]	1	2	1	D3YTR2	D3YTR2 [294-321]		1	3475.85							4	-0.43	40.8881
	194.6	194.9	143.8	19.9	20.4	26.2	[R].SAGSLCADSPANDKER.[T]	1xCarbamidomethyl [C6]; 1xTMT6plex [K14]; 1xTMT6plex [N-Term]	1	2	1	D3YTR2	D3YTR2 [261-276]		1	2136.08	30.8	32.2	22.1	2.9	3	3.7	3	-0.44	39.9878
							[R].GAGAEPGSGAESTGPGAGPGGGR.[V]	1xTMT6plex [N-Term]	1	2	2	D3YTR2	D3YTR2 [24-46]		0	2083							3	0.97	33.9456
							[R].VSVSAQDSPR.[A]	1xTMT6plex [N-Term]	1	2	1	D3YTR2	D3YTR2 [473-482]		0	1274.69							2	-1.58	37.2118
							[R].TADNVQASDSSSDSQTK.[T]	1xTMT6plex [K17]; 1xTMT6plex [N-Term]	1	2	1	D3YTR2	D3YTR2 [277-293]		0	2199.08							3	1.87	35.3922
							[R].AQSPSTSPDPNQAGSK.[A]	1xTMT6plex [K16]; 1xTMT6plex [N-Term]	1	2	1	D3YTR2	D3YTR2 [483-498]		0	2030.06							3	-8.96	36.2713
							[K].APVEPGDAGSK.[N]	1xTMT6plex [K11]; 1xTMT6plex [N-Term]	1	2	1	D3YTR2	D3YTR2 [499-509]		0	1485.83							2	-3.38	40.3705
							[R].RSAGSLCADSPANDK.[E]	1xCarbamidomethyl [C7]; 1xTMT6plex [K15]; 1xTMT6plex [N-Term]	1	2	1	D3YTR2	D3YTR2 [260-274]		1	2007.03							3	-2.39	38.5851
							[R].GLSTVQCHR.[I]	1xCarbamidomethyl [C7]; 1xTMT6plex [N-Term]	1	2	1	D3YTR2	D3YTR2 [127-135]		0	1286.68							3	-3.52	32.2572
193.9	153.1	188.2	24.9	19.9	19.9	Q9R109	Ornithine decarboxylase antizyme 3 OS=Mus musculus OX=10090 GN=Oaz3 PE=1 SV=2	8	2	2	2	243	28.2	7.4	26.2	21.6	24.7	3.1	2.5	2.4
	Abundances (Grouped): F1, 126	Abundances (Grouped): F1, 127	Abundances (Grouped): F1, 128	Abundances (Grouped): F1, 129	Abundances (Grouped): F1, 130	Abundances (Grouped): F1, 131	Annotated Sequence	Modifications	# Protein Groups	# Proteins	# PSMs	Master Protein Accessions	Positions in Master Proteins	Modifications in Master Proteins	# Missed Cleavages	Theo. MH+ [Da]	Abundance: F1: 126, Sample	Abundance: F1: 127, Sample	Abundance: F1: 128, Sample	Abundance: F1: 129, Sample	Abundance: F1: 130, Sample	Abundance: F1: 131, Sample	Charge (by Search Engine): Sequest HT	DeltaM [ppm] (by Search Engine): Sequest HT	RT [min] (by Search Engine): Sequest HT
							[R].SRPSLYSLSYIK.[R]	1xTMT6plex [K12]; 1xTMT6plex [N-Term]	1	4	1	Q9R109	Q9R109 [6-17]		0	1872.1							3	-4.01	55.7319
	193.9	153.1	188.2	24.9	19.9	19.9	[R].DLGHPGQ.[-]	1xTMT6plex [N-Term]	1	4	1	Q9R109	Q9R109 [237-243]		0	952.505	26.2	21.6	24.7	3.1	2.5	2.4	2	0.35	31.8402
188.7	180.8	178.3	16.5	17.1	18.6	Q9DAE3	Late cornified envelope-like proline-rich protein 1 OS=Mus musculus OX=10090 GN=Lelp1 PE=2 SV=2	33	4	8	4	120	12.7	8.22	882	882	809.3	70.9	74	77.3
	Abundances (Grouped): F1, 126	Abundances (Grouped): F1, 127	Abundances (Grouped): F1, 128	Abundances (Grouped): F1, 129	Abundances (Grouped): F1, 130	Abundances (Grouped): F1, 131	Annotated Sequence	Modifications	# Protein Groups	# Proteins	# PSMs	Master Protein Accessions	Positions in Master Proteins	Modifications in Master Proteins	# Missed Cleavages	Theo. MH+ [Da]	Abundance: F1: 126, Sample	Abundance: F1: 127, Sample	Abundance: F1: 128, Sample	Abundance: F1: 129, Sample	Abundance: F1: 130, Sample	Abundance: F1: 131, Sample	Charge (by Search Engine): Sequest HT	DeltaM [ppm] (by Search Engine): Sequest HT	RT [min] (by Search Engine): Sequest HT
	197.2	186.5	172.3	10.3	19.5	14.2	[R].CSGTLACCPPSCPQK.[G]	4xCarbamidomethyl [C1; C7; C8; C12]; 1xTMT6plex [K15]; 1xTMT6plex [N-Term]	1	1	2	Q9DAE3	Q9DAE3 [88-102]		0	2181.03	68.5	67.6	58.1	3.3	6.3	4.4	3	-2.12	43.8411
	199.2	189.2	185.6	8.7	8.9	8.4	[K].CQPSCLNK.[L]	2xCarbamidomethyl [C1; C5]; 1xTMT6plex [K8]; 1xTMT6plex [N-Term]	1	1	3	Q9DAE3	Q9DAE3 [28-35]		0	1464.77	406.4	403	367.6	16.3	16.9	15.3	2	-1.51	40.2931
	177.9	175.1	174.5	23.1	23.3	26.2	[K].GCVKPCPPK.[C]	2xCarbamidomethyl [C2; C6]; 2xTMT6plex [K4; K9]; 1xTMT6plex [N-Term]	1	1	2	Q9DAE3	Q9DAE3 [103-111]		0	1730.01	363.9	373.9	346.6	43.4	44.2	47.7	3	-4.33	38.6369
	179.9	149.7	158.7	35.8	29.6	46.3	[K].CPSPCLPR.[K]	2xCarbamidomethyl [C1; C5]; 1xTMT6plex [N-Term]	1	1	1	Q9DAE3	Q9DAE3 [112-119]		0	1215.62	43.2	37.5	37	7.9	6.6	9.9	2	-0.92	41.6214
184.7	192.4	186.4	12.7	12.2	11.5	P15265	Sperm mitochondrial-associated cysteine-rich protein OS=Mus musculus OX=10090 GN=Smcp PE=2 SV=4	69	6	14	6	143	14.9	8.1	1535.4	1669.4	1504.7	97.3	94.1	85.3
	Abundances (Grouped): F1, 126	Abundances (Grouped): F1, 127	Abundances (Grouped): F1, 128	Abundances (Grouped): F1, 129	Abundances (Grouped): F1, 130	Abundances (Grouped): F1, 131	Annotated Sequence	Modifications	# Protein Groups	# Proteins	# PSMs	Master Protein Accessions	Positions in Master Proteins	Modifications in Master Proteins	# Missed Cleavages	Theo. MH+ [Da]	Abundance: F1: 126, Sample	Abundance: F1: 127, Sample	Abundance: F1: 128, Sample	Abundance: F1: 129, Sample	Abundance: F1: 130, Sample	Abundance: F1: 131, Sample	Charge (by Search Engine): Sequest HT	DeltaM [ppm] (by Search Engine): Sequest HT	RT [min] (by Search Engine): Sequest HT
	186.5	186.2	187.8	11.6	13.5	14.3	[K].GSQSPQSPPGAQGNWNQKK.[S]	2xTMT6plex [K18; K19]; 1xTMT6plex [N-Term]	1	1	2	P15265	P15265 [122-140]		1	2683.45	240.7	250.9	235.3	13.8	16.2	16.5	3	-2.01	42.9484
	170.3	185.2	180.8	21.7	21.3	20.7	[K].GSQSPQSPPGAQGNWNQK.[K]	1xTMT6plex [K18]; 1xTMT6plex [N-Term]	1	1	4	P15265	P15265 [122-139]		0	2326.19	153.4	174.1	158.1	18	17.8	16.6	3	0.37	44.591
	183.9	205.3	189.9	9.8	4.7	6.5	[K].CTCCPQPPPCCAQPTCCSSENKTESDSDTSGQTLEK.[G]	7xCarbamidomethyl [C1; C3; C4; C10; C11; C16; C17]; 2xTMT6plex [K22; K36]; 1xTMT6plex [N-Term]	1	1	2	P15265	P15265 [86-121]		1	4865.12	102.1	119	102.4	5	2.4	3.2	4	0.37	46.0329
	187.7	197.7	185.6	11.1	10.1	7.8	[K].TNQCPPPCCPPKPCCPPKPCCPQKPPCCPK.[S]	9xCarbamidomethyl [C4; C8; C9; C14; C15; C20; C21; C27; C28]; 4xTMT6plex [K12; K18; K24; K30]; 1xTMT6plex [N-Term]	1	1	4	P15265	P15265 [7-36]		0	4850.38	764.2	840	733.7	41.7	38.2	28.4	6	-4.35	45.6521
	154.5	137.9	165.6	48.3	43.2	50.5	[K].CTCCPQPPPCCAQPTCCSSENK.[T]	7xCarbamidomethyl [C1; C3; C4; C10; C11; C16; C17]; 1xTMT6plex [K22]; 1xTMT6plex [N-Term]	1	1	1	P15265	P15265 [86-107]		0	3157.32	24.7	23	25.7	7.1	6.4	7.2	4	-0.31	41.6009
	187.6	188.4	192.6	9.5	10.6	11.3	[K].SPCCPPK.[SP]	2xCarbamidomethyl [C3; C4]; 1xTMT6plex [K7]; 1xTMT6plex [N-Term]	1	1	1	P15265	P15265 [37-43]; [44-50]		0	1303.69	250.3	262.4	249.5	11.7	13.1	13.4	2	-0.25	36.0001
176.7	182.2	180.1	21.2	19.4	20.4	G3X9P7	Potassium channel subfamily U member 1 OS=Mus musculus OX=10090 GN=Kcnu1 PE=1 SV=1	1	1	1	1	1121	126.8	8.1	243.9	262.5	241.3	26.9	24.8	25.1
	Abundances (Grouped): F1, 126	Abundances (Grouped): F1, 127	Abundances (Grouped): F1, 128	Abundances (Grouped): F1, 129	Abundances (Grouped): F1, 130	Abundances (Grouped): F1, 131	Annotated Sequence	Modifications	# Protein Groups	# Proteins	# PSMs	Master Protein Accessions	Positions in Master Proteins	Modifications in Master Proteins	# Missed Cleavages	Theo. MH+ [Da]	Abundance: F1: 126, Sample	Abundance: F1: 127, Sample	Abundance: F1: 128, Sample	Abundance: F1: 129, Sample	Abundance: F1: 130, Sample	Abundance: F1: 131, Sample	Charge (by Search Engine): Sequest HT	DeltaM [ppm] (by Search Engine): Sequest HT	RT [min] (by Search Engine): Sequest HT
	176.7	182.2	180.1	21.2	19.4	20.4	[-].MSQTLLDSLNQK.[E]	1xTMT6plex [K12]; 1xTMT6plex [N-Term]; 1xMet-loss [N-Term]	1	2	1	G3X9P7	G3X9P7 [1-12]	G3X9P7 1xMet-loss [N-Term]	0	1704.99	243.9	262.5	241.3	26.9	24.8	25.1	3	0.14	42.6204
172.6	168.5	178.1	28.5	26.8	25.5	Q6ZQ06	Centrosomal protein of 162 kDa OS=Mus musculus OX=10090 GN=Cep162 PE=1 SV=2	1	3	4	3	1403	160.8	5.53	447.6	456.1	448.5	67.9	64.6	59
	Abundances (Grouped): F1, 126	Abundances (Grouped): F1, 127	Abundances (Grouped): F1, 128	Abundances (Grouped): F1, 129	Abundances (Grouped): F1, 130	Abundances (Grouped): F1, 131	Annotated Sequence	Modifications	# Protein Groups	# Proteins	# PSMs	Master Protein Accessions	Positions in Master Proteins	Modifications in Master Proteins	# Missed Cleavages	Theo. MH+ [Da]	Abundance: F1: 126, Sample	Abundance: F1: 127, Sample	Abundance: F1: 128, Sample	Abundance: F1: 129, Sample	Abundance: F1: 130, Sample	Abundance: F1: 131, Sample	Charge (by Search Engine): Sequest HT	DeltaM [ppm] (by Search Engine): Sequest HT	RT [min] (by Search Engine): Sequest HT
	180.6	178	184.8	19.9	20.2	16.4	[R].KIATQEVLLK.[H]	2xTMT6plex [K1; K10]; 1xTMT6plex [N-Term]	1	1	1	Q6ZQ06	Q6ZQ06 [1252-1261]		1	1830.2	295.3	303.8	293.5	30	30.7	23.9	3	-1.07	57.9848
							[K].EAHQITVR.[K]	1xTMT6plex [N-Term]	1	1	1	Q6ZQ06	Q6ZQ06 [1039-1046]		0	1182.68							3	-1.81	29.7799
	158.9	152.3	166.6	43	38.1	41.1	[K].IATQEVLLK.[H]	1xTMT6plex [K9]; 1xTMT6plex [N-Term]	1	1	2	Q6ZQ06	Q6ZQ06 [1253-1261]		0	1472.95	152.3	152.3	155	37.9	33.9	35.1	2	0.57	58.7181
170.2	201.8	162.4	20.2	24.6	20.9	Q9D9G4	1700080O16Rik protein OS=Mus musculus OX=10090 GN=Magea14 PE=2 SV=1	8	2	2	2	284	32.1	6	53	65.6	49.1	5.8	7.1	5.8
	Abundances (Grouped): F1, 126	Abundances (Grouped): F1, 127	Abundances (Grouped): F1, 128	Abundances (Grouped): F1, 129	Abundances (Grouped): F1, 130	Abundances (Grouped): F1, 131	Annotated Sequence	Modifications	# Protein Groups	# Proteins	# PSMs	Master Protein Accessions	Positions in Master Proteins	Modifications in Master Proteins	# Missed Cleavages	Theo. MH+ [Da]	Abundance: F1: 126, Sample	Abundance: F1: 127, Sample	Abundance: F1: 128, Sample	Abundance: F1: 129, Sample	Abundance: F1: 130, Sample	Abundance: F1: 131, Sample	Charge (by Search Engine): Sequest HT	DeltaM [ppm] (by Search Engine): Sequest HT	RT [min] (by Search Engine): Sequest HT
	170.2	201.8	162.4	20.2	24.6	20.9	[R].YADALKDEIDRT.[-]	1xTMT6plex [K6]; 1xTMT6plex [N-Term]	1	1	1	Q9D9G4	Q9D9G4 [273-284]		2	1868.02	53	65.6	49.1	5.8	7.1	5.8	3	-5.59	56.8662
							[R].QVPGSDPPTR.[E]	1xTMT6plex [N-Term]	1	1	1	Q9D9G4	Q9D9G4 [228-237]		0	1282.7							2	0.08	34.2482
169	170.3	169.3	30.9	29.9	30.6	Q0P5Y3	Tubulin polymerization-promoting protein family member 2 OS=Mus musculus OX=10090 GN=Tppp2 PE=2 SV=1	74	15	22	14	170	18.7	8.85	4514.6	4746.4	4391.1	758.6	740.6	728.8
	Abundances (Grouped): F1, 126	Abundances (Grouped): F1, 127	Abundances (Grouped): F1, 128	Abundances (Grouped): F1, 129	Abundances (Grouped): F1, 130	Abundances (Grouped): F1, 131	Annotated Sequence	Modifications	# Protein Groups	# Proteins	# PSMs	Master Protein Accessions	Positions in Master Proteins	Modifications in Master Proteins	# Missed Cleavages	Theo. MH+ [Da]	Abundance: F1: 126, Sample	Abundance: F1: 127, Sample	Abundance: F1: 128, Sample	Abundance: F1: 129, Sample	Abundance: F1: 130, Sample	Abundance: F1: 131, Sample	Charge (by Search Engine): Sequest HT	DeltaM [ppm] (by Search Engine): Sequest HT	RT [min] (by Search Engine): Sequest HT
	149.4	152.9	148.8	36.8	36.3	75.8	[K].STTVGGVDRLTDTSKYTGTHK.[E]	2xTMT6plex [K15; K21]; 1xTMT6plex [N-Term]	1	1	1	Q0P5Y3	Q0P5Y3 [111-131]		2	2911.61	140.6	150.2	136	31.9	31.7	63.6	5	-0.73	47.0575
	165.2	161.8	166.9	35.2	32.8	38.1	[R].FAVFGESSSSSKEITNK.[N]	2xTMT6plex [K12; K17]; 1xTMT6plex [N-Term]	1	1	1	Q0P5Y3	Q0P5Y3 [12-28]		1	2505.38	568.9	581.5	558	111.4	104.8	117	3	-4.73	56.0063
	174.5	181	186.3	20.2	18.9	19	[R].FAVFGESSSSSK.[E]	1xTMT6plex [K12]; 1xTMT6plex [N-Term]	1	1	1	Q0P5Y3	Q0P5Y3 [12-23]		0	1690.91	492.3	532.9	510.3	52.5	49.5	47.8	2	-3.7	57.0292
	185.6	187	162.2	25.6	19.2	20.4	[K].GIEGREETTDNSGYVSGYK.[G]	1xTMT6plex [K19]; 1xTMT6plex [N-Term]	1	1	2	Q0P5Y3	Q0P5Y3 [142-160]		1	2520.26	44.9	47.2	38.1	5.7	4.3	4.4	3	-0.05	46.5806
	165.8	168.1	163.2	35.1	33.5	34.4	[K].GKNPDEALQGVFK.[L]	2xTMT6plex [K2; K13]; 1xTMT6plex [N-Term]	1	1	1	Q0P5Y3	Q0P5Y3 [84-96]		1	2090.22	485.9	514.2	464.5	94.6	91	89.8	3	-4.22	55.595
	175.6	183.4	181.4	20.1	21.1	18.5	[K].LMEGKDPATTGVTK.[S]	2xTMT6plex [K5; K14]; 1xTMT6plex [N-Term]	1	1	1	Q0P5Y3	Q0P5Y3 [97-110]		1	2135.23	397	432.9	398.2	41.9	44.2	37.2	3	-3.13	49.5362
	168.4	169.3	172.3	32.8	28.6	28.5	[K].AVTSTDVDIVFSK.[V]	1xTMT6plex [K13]; 1xTMT6plex [N-Term]	1	1	1	Q0P5Y3	Q0P5Y3 [44-56]		0	1840.05	472.6	496	469.6	84.7	74.5	71.3	2	-0.24	58.4891
	177.2	183.6	178.6	17.4	24.4	18.7	[K].GKGIEGREETTDNSGYVSGYK.[G]	2xTMT6plex [K2; K21]; 1xTMT6plex [N-Term]	1	1	2	Q0P5Y3	Q0P5Y3 [140-160]		2	2934.54	112.8	122	110.4	10.2	14.4	10.6	4	0.95	44.9075
	170.3	182.3	196.7		17.7	32.9	[R].EETTDNSGYVSGYK.[G]	1xTMT6plex [K14]; 1xTMT6plex [N-Term]	1	1	2	Q0P5Y3	Q0P5Y3 [147-160]		0	2007.99	23.8	26.6	26.7		2.3	4.1	2	-2.86	46.68
	155.7	148.7	151.1	55	48.3	41.2	[K].STTVGGVDRLTDTSK.[Y]	1xTMT6plex [K15]; 1xTMT6plex [N-Term]	1	1	1	Q0P5Y3	Q0P5Y3 [111-125]		1	1995.11	69.5	69.3	65.5	22.6	20	16.4	3	0.86	46.0118
	179.7	177.4	176.2	24	21.7	21	[K].DCDIMDGK.[A]	1xCarbamidomethyl [C2]; 1xTMT6plex [K8]; 1xTMT6plex [N-Term]	1	1	2	Q0P5Y3	Q0P5Y3 [36-43]		0	1411.7	586.3	604.3	558.3	72.1	65.6	61	2	3.29	48.6059
	161.2	166.8	154	39.1	41.5	37.4	[K].LCKDCDIMDGK.[A]	2xCarbamidomethyl [C2; C5]; 2xTMT6plex [K3; K11]; 1xTMT6plex [N-Term]	1	1	1	Q0P5Y3	Q0P5Y3 [33-43]		1	2042.07	477.7	515.8	443.2	106.5	114.2	98.7	3	-8.8	51.5316
	164.4	157.9	159.9	40.4	40	37.3	[K].LMEGKDPATTGVTK.[S]	1xOxidation [M2]; 2xTMT6plex [K5; K14]; 1xTMT6plex [N-Term]	1	1	2	Q0P5Y3	Q0P5Y3 [97-110]		1	2151.23	379.6	380.5	358.5	85.8	85.7	76.8	3	-1.11	44.819
	199	207.1	193.9				[R].EETTDNSGYVSGYKGAGTYDK.[K]	2xTMT6plex [K14; K21]; 1xTMT6plex [N-Term]	1	1	1	Q0P5Y3	Q0P5Y3 [147-167]		1	2929.47	39.3	42.7	37.2				3	-2.67	48.9361
	163.5	166.4	171.1	36.8	31.2	31	[K].ERFDESGK.[G]	1xTMT6plex [K8]; 1xTMT6plex [N-Term]	2	2	1	Q9CRB6; Q0P5Y3	Q9CRB6 [137-144]; Q0P5Y3 [132-139]		1	1425.77	123.2	130.9	125.2	25.5	21.8	20.8	3	0.74	37.6589
	175.9	168.1	157.9	33.2	38	26.9	[R].EETTDNSGYVSGYKGAGTYDKK.[N]	3xTMT6plex [K14; K21; K22]; 1xTMT6plex [N-Term]	1	1	1	Q0P5Y3	Q0P5Y3 [147-168]		2	3286.72	37.4	37.3	32.6	6.5	7.5	5.1	4	-1.52	47.5115
	184.1	174.4	177.5	21.4	28.8	13.8	[K].DCDIMDGK.[A]	1xCarbamidomethyl [C2]; 1xOxidation [M5]; 1xTMT6plex [K8]; 1xTMT6plex [N-Term]	1	1	1	Q0P5Y3	Q0P5Y3 [36-43]		0	1427.69	62.8	62.1	58.8	6.7	9.1	4.2	2	1.46	39.8741
167.7	170.1	166.6	31.5	33.1	30.9	Q0VF76	Tetratricopeptide repeat domain 39D OS=Mus musculus OX=10090 GN=Ttc39d PE=2 SV=1	10	6	8	6	604	69.9	7.97	645.8	683.5	622.7	111.7	118.2	106.2
	Abundances (Grouped): F1, 126	Abundances (Grouped): F1, 127	Abundances (Grouped): F1, 128	Abundances (Grouped): F1, 129	Abundances (Grouped): F1, 130	Abundances (Grouped): F1, 131	Annotated Sequence	Modifications	# Protein Groups	# Proteins	# PSMs	Master Protein Accessions	Positions in Master Proteins	Modifications in Master Proteins	# Missed Cleavages	Theo. MH+ [Da]	Abundance: F1: 126, Sample	Abundance: F1: 127, Sample	Abundance: F1: 128, Sample	Abundance: F1: 129, Sample	Abundance: F1: 130, Sample	Abundance: F1: 131, Sample	Charge (by Search Engine): Sequest HT	DeltaM [ppm] (by Search Engine): Sequest HT	RT [min] (by Search Engine): Sequest HT
	165.2	172.2	155.3	34.5	36.2	36.6	[K].SGVNVGSSYQIYK.[D]	1xTMT6plex [K13]; 1xTMT6plex [N-Term]	1	1	2	Q0VF76	Q0VF76 [191-203]		0	1860.03	162.2	176.5	148.1	31.2	33	32	2	-0.05	53.1293
	172.9	166.3	161.8	33.2	37.7	28	[K].DCQQVLELMPENQSK.[T]	1xCarbamidomethyl [C2]; 1xTMT6plex [K15]; 1xTMT6plex [N-Term]	1	1	1	Q0VF76	Q0VF76 [204-218]		0	2277.16	114.2	114.7	103.8	20.2	23.1	16.5	3	-2.24	58.1515
	150.7	167.6	163	39.4	38.9	40.4	[R].AHIALEQIAK.[L]	1xTMT6plex [K10]; 1xTMT6plex [N-Term]	1	1	1	Q0VF76	Q0VF76 [592-601]		0	1551.96	139.6	162.1	146.6	33.6	33.4	33.4	3	-0.89	50.3689
	164.5	170.5	168.1	33.2	35.3	28.5	[K].GDYANAMK.[N]	1xTMT6plex [K8]; 1xTMT6plex [N-Term]	1	1	1	Q0VF76	Q0VF76 [564-571]		0	1327.71	64.7	70	64.2	12	12.9	10	2	-0.67	44.4714
	186.1	173	185.7	18	19.2	18.1	[K].DYSMEAR.[L]	1xTMT6plex [N-Term]	1	1	2	Q0VF76	Q0VF76 [581-587]		0	1100.52	165.1	160.2	160	14.7	15.8	14.3	2	0.52	39.0399
							[K].AEHYFIR.[V]	1xTMT6plex [N-Term]	1	1	1	Q0VF76	Q0VF76 [528-534]		0	1164.64							3	0.27	43.7433
166.2	162.1	158.6	38.5	35.9	38.7	F6TY75	RNA-binding protein MEX3D (Fragment) OS=Mus musculus OX=10090 GN=Mex3d PE=1 SV=1	21	4	7	1	268	26.7	5.16	352.7	359.1	326.9	75.2	70.8	73.2
	Abundances (Grouped): F1, 126	Abundances (Grouped): F1, 127	Abundances (Grouped): F1, 128	Abundances (Grouped): F1, 129	Abundances (Grouped): F1, 130	Abundances (Grouped): F1, 131	Annotated Sequence	Modifications	# Protein Groups	# Proteins	# PSMs	Master Protein Accessions	Positions in Master Proteins	Modifications in Master Proteins	# Missed Cleavages	Theo. MH+ [Da]	Abundance: F1: 126, Sample	Abundance: F1: 127, Sample	Abundance: F1: 128, Sample	Abundance: F1: 129, Sample	Abundance: F1: 130, Sample	Abundance: F1: 131, Sample	Charge (by Search Engine): Sequest HT	DeltaM [ppm] (by Search Engine): Sequest HT	RT [min] (by Search Engine): Sequest HT
	105.9	100.5	109	79.8	79.2	125.5	[R].AAPLPAFSGCPAVNGAPAQPNTGTR.[R]	1xCarbamidomethyl [C10]; 1xTMT6plex [N-Term]	2	3	1	F6TY75; D3YTR3	F6TY75 [68-92]; D3YTR3 [532-556]		0	2651.36	83.4	82.6	83.3	57.8	57.9	88.1	3	-5.61	54.8095
	166.2	162.1	158.6	38.5	35.9	38.7	[R].VEAISLRPSSSASVLDK.[-]	1xTMT6plex [K17]; 1xTMT6plex [N-Term]	1	1	1	F6TY75	F6TY75 [252-268]		0	2217.29	352.7	359.1	326.9	75.2	70.8	73.2	3	-6.01	55.3376
	197.8	207.9	191.1	1.8	1.5		[K].SEPECPACR.[T]	2xCarbamidomethyl [C5; C8]; 1xTMT6plex [N-Term]	2	3	4	F6TY75; D3YTR3	F6TY75 [235-243]; D3YTR3 [699-707]		0	1334.6	350.8	384.9	329.1	2.9	2.4		2	-1.16	30.0824
	159.3	159.6	166.4	38.1	35.8	40.8	[R].ICGKSEPECPACR.[T]	3xCarbamidomethyl [C2; C9; C12]; 1xTMT6plex [K4]; 1xTMT6plex [N-Term]	2	3	1	F6TY75; D3YTR3	F6TY75 [231-243]; D3YTR3 [695-707]		1	2022	69.6	72.8	70.6	15.3	14.5	15.9	3	-2.14	39.6831
165.6	167.7	165.1	34.9	32.8	34	Q80Y39	Uncharacterized protein C10orf62 homolog OS=Mus musculus OX=10090 PE=2 SV=1	34	10	11	10	304	34	9.51	1255.8	1327.1	1215.6	243.2	230.7	229.6
	Abundances (Grouped): F1, 126	Abundances (Grouped): F1, 127	Abundances (Grouped): F1, 128	Abundances (Grouped): F1, 129	Abundances (Grouped): F1, 130	Abundances (Grouped): F1, 131	Annotated Sequence	Modifications	# Protein Groups	# Proteins	# PSMs	Master Protein Accessions	Positions in Master Proteins	Modifications in Master Proteins	# Missed Cleavages	Theo. MH+ [Da]	Abundance: F1: 126, Sample	Abundance: F1: 127, Sample	Abundance: F1: 128, Sample	Abundance: F1: 129, Sample	Abundance: F1: 130, Sample	Abundance: F1: 131, Sample	Charge (by Search Engine): Sequest HT	DeltaM [ppm] (by Search Engine): Sequest HT	RT [min] (by Search Engine): Sequest HT
	164.9	184.4	169.9	28.3	25.7	26.8	[R].KAATETTEDKPLESHR.[A]	2xTMT6plex [K1; K10]; 1xTMT6plex [N-Term]	1	1	1	Q80Y39	Q80Y39 [10-25]		1	2500.4	22.8	26.6	22.8	3.6	3.3	3.3	5	-1.57	36.5905
	146	157.3	171.7	37.6	43.8	43.6	[R].ESGKSPSMEDDTWAAVAACTK.[E]	1xCarbamidomethyl [C19]; 2xTMT6plex [K4; K21]; 1xTMT6plex [N-Term]	1	1	1	Q80Y39	Q80Y39 [106-126]		1	2928.47	16.9	19	19.3	4	4.7	4.5	4	2.33	57.0915
							[K].AATETTEDKPLESHR.[A]	1xTMT6plex [K9]; 1xTMT6plex [N-Term]	1	1	1	Q80Y39	Q80Y39 [11-25]		0	2143.14							4	0.35	36.4813
	152.2	131.9	120.3	68	84.9	42.7	[R].HGEVNTTLHVDTLTTK.[H]	1xTMT6plex [K16]; 1xTMT6plex [N-Term]	1	1	1	Q80Y39	Q80Y39 [60-75]		0	2224.23	16.8	15.2	12.9	6.9	8.7	4.2	4	0.15	47.0587
	152.8	185.8	162.1	36.9	33.8	28.6	[R].LSEERLPTYR.[Y]	1xTMT6plex [N-Term]	1	1	1	Q80Y39	Q80Y39 [38-47]		1	1492.83	23.4	29.7	24.1	5.2	4.8	3.9	3	-1.46	47.404
	152.1	156.1	161.6	44.8	42.7	42.7	[R].VANSMLQR.[S]	1xTMT6plex [N-Term]	1	1	1	Q80Y39	Q80Y39 [135-142]		0	1147.65	181.9	194.8	187.6	49.3	47.4	45.5	2	-1.86	43.405
	179.9	182.8	173.6	19.9	20.6	23.1	[R].NISPEELK.[A]	1xTMT6plex [K8]; 1xTMT6plex [N-Term]	1	1	2	Q80Y39	Q80Y39 [156-163]		0	1387.82	367.6	389.9	344.4	37.3	39.1	42.1	2	-2.99	51.5008
	149.5	148.8	147.7	56	45.7	52.3	[K].ISGSSMTK.[E]	1xTMT6plex [K8]; 1xTMT6plex [N-Term]	1	1	1	Q80Y39	Q80Y39 [94-101]		0	1268.73	258	268	247.4	88.8	73.2	80.5	2	-3.98	42.3076
	175.3	175	175	24.9	25.4	24.3	[R].ANDSWIK.[S]	1xTMT6plex [K7]; 1xTMT6plex [N-Term]	1	1	1	Q80Y39	Q80Y39 [26-32]		0	1291.74	368.4	383.9	357.1	48.1	49.5	45.6	2	-1.54	51.6045
							[K].ALEEVEIK.[L]	1xTMT6plex [K8]; 1xTMT6plex [N-Term]	1	1	1	Q80Y39	Q80Y39 [164-171]		0	1388.84							2	-0.63	55.0364
165.2	161.3	153	45.7	40.7	34.1	Q9DD03	Ras-related protein Rab-13 OS=Mus musculus OX=10090 GN=Rab13 PE=1 SV=1	7	2	2	1	202	22.8	9.5	78.3	79.8	70.4	19.9	17.9	14.4
	Abundances (Grouped): F1, 126	Abundances (Grouped): F1, 127	Abundances (Grouped): F1, 128	Abundances (Grouped): F1, 129	Abundances (Grouped): F1, 130	Abundances (Grouped): F1, 131	Annotated Sequence	Modifications	# Protein Groups	# Proteins	# PSMs	Master Protein Accessions	Positions in Master Proteins	Modifications in Master Proteins	# Missed Cleavages	Theo. MH+ [Da]	Abundance: F1: 126, Sample	Abundance: F1: 127, Sample	Abundance: F1: 128, Sample	Abundance: F1: 129, Sample	Abundance: F1: 130, Sample	Abundance: F1: 131, Sample	Charge (by Search Engine): Sequest HT	DeltaM [ppm] (by Search Engine): Sequest HT	RT [min] (by Search Engine): Sequest HT
	93.6	101.5	95.9	106.8	105.2	97.2	[RK].TITTAYYR.[G]	1xTMT6plex [N-Term]	6	12	1	P63011; A2A7Z6; Q9DD03; P61028; P55258; P35276	P63011 [86-93]; A2A7Z6 [86-93]; Q9DD03 [72-79]; P61028 [72-79]; P55258 [72-79]; P35276 [86-93]		0	1217.67	121.1	137.1	120.5	127.1	126.3	112.1	2	-0.28	45.9603
	165.2	161.3	153	45.7	40.7	34.1	[R].TVDIEGK.[R]	1xTMT6plex [K7]; 1xTMT6plex [N-Term]	1	1	1	Q9DD03	Q9DD03 [49-55]		0	1219.73	78.3	79.8	70.4	19.9	17.9	14.4	2	-0.58	46.5431
165	169	171.6	29.6	28.1	36.7	E9Q9G1	Nudix (nucleoside diphosphate-linked moiety X)-type motif 16-like 2 OS=Mus musculus OX=10090 GN=Nudt16l2 PE=4 SV=1	28	4	4	3	206	22.5	6.21	301.5	322.2	304.4	49.8	47.6	59.7
	Abundances (Grouped): F1, 126	Abundances (Grouped): F1, 127	Abundances (Grouped): F1, 128	Abundances (Grouped): F1, 129	Abundances (Grouped): F1, 130	Abundances (Grouped): F1, 131	Annotated Sequence	Modifications	# Protein Groups	# Proteins	# PSMs	Master Protein Accessions	Positions in Master Proteins	Modifications in Master Proteins	# Missed Cleavages	Theo. MH+ [Da]	Abundance: F1: 126, Sample	Abundance: F1: 127, Sample	Abundance: F1: 128, Sample	Abundance: F1: 129, Sample	Abundance: F1: 130, Sample	Abundance: F1: 131, Sample	Charge (by Search Engine): Sequest HT	DeltaM [ppm] (by Search Engine): Sequest HT	RT [min] (by Search Engine): Sequest HT
							[K].CLTLEQLQAVEAGAPQAK.[D]	1xCarbamidomethyl [C1]; 1xTMT6plex [K18]; 1xTMT6plex [N-Term]	1	2	1	E9Q9G1	E9Q9G1 [115-132]		0	2385.32							3	-2.24	58.4088
	177.4	179.1	180.9	20.1	19	23.6	[R].DGVGGLPAFLENSFIGVAR.[E]	1xTMT6plex [N-Term]	1	1	1	E9Q9G1	E9Q9G1 [151-169]		0	2148.17	220.9	232.7	218.7	23	21.9	26.2	2	0.31	59.2901
	131.4	143.8	137.8	63.6	63.5	59.9	[KR].DHGLEVLGLVR.[V]	1xTMT6plex [N-Term]	3	6	1	E9Q9G1; Q6P3D0; A0A2R8VH99	E9Q9G1 [133-143]; Q6P3D0 [132-142]; A0A2R8VH99 [134-144]		0	1436.84	33.7	38.5	34.3	15	15.1	13.7	3	-2.29	57.0943
	144.2	150.2	162.7	39.4	35.1	68.3	[R].SPSLEEGLNK.[E]	1xTMT6plex [K10]; 1xTMT6plex [N-Term]	1	2	1	E9Q9G1	E9Q9G1 [67-76]		0	1531.87	46.9	51	51.4	11.8	10.6	19.8	2	0.51	49.9328
164.9	151.2	151.5	34.7	50.2	47.5	B1AT60	Archaemetzincin-2 OS=Mus musculus OX=10090 GN=Amz2 PE=1 SV=2	2	1	1	1	322	37.2	7.69	78.6	75.2	70.1	15.2	22.2	20.2
	Abundances (Grouped): F1, 126	Abundances (Grouped): F1, 127	Abundances (Grouped): F1, 128	Abundances (Grouped): F1, 129	Abundances (Grouped): F1, 130	Abundances (Grouped): F1, 131	Annotated Sequence	Modifications	# Protein Groups	# Proteins	# PSMs	Master Protein Accessions	Positions in Master Proteins	Modifications in Master Proteins	# Missed Cleavages	Theo. MH+ [Da]	Abundance: F1: 126, Sample	Abundance: F1: 127, Sample	Abundance: F1: 128, Sample	Abundance: F1: 129, Sample	Abundance: F1: 130, Sample	Abundance: F1: 131, Sample	Charge (by Search Engine): Sequest HT	DeltaM [ppm] (by Search Engine): Sequest HT	RT [min] (by Search Engine): Sequest HT
	164.9	151.2	151.5	34.7	50.2	47.5	[R].VISEEYIK.[W]	1xTMT6plex [K8]; 1xTMT6plex [N-Term]	1	3	1	B1AT60	B1AT60 [102-109]		0	1438.86	78.6	75.2	70.1	15.2	22.2	20.2	2	-0.52	55.0892
164.3	163.2	165.7	35.9	34.7	36.1	G3UWB9	Heat shock protein beta-9 OS=Mus musculus OX=10090 GN=Hspb9 PE=3 SV=1	51	10	22	10	199	21.7	9.98	986.4	1022.8	966.1	198.3	193.6	193.4
	Abundances (Grouped): F1, 126	Abundances (Grouped): F1, 127	Abundances (Grouped): F1, 128	Abundances (Grouped): F1, 129	Abundances (Grouped): F1, 130	Abundances (Grouped): F1, 131	Annotated Sequence	Modifications	# Protein Groups	# Proteins	# PSMs	Master Protein Accessions	Positions in Master Proteins	Modifications in Master Proteins	# Missed Cleavages	Theo. MH+ [Da]	Abundance: F1: 126, Sample	Abundance: F1: 127, Sample	Abundance: F1: 128, Sample	Abundance: F1: 129, Sample	Abundance: F1: 130, Sample	Abundance: F1: 131, Sample	Charge (by Search Engine): Sequest HT	DeltaM [ppm] (by Search Engine): Sequest HT	RT [min] (by Search Engine): Sequest HT
							[R].LLRDEVQGNGCEQPSFQIK.[V]	1xCarbamidomethyl [C11]; 1xTMT6plex [K19]; 1xTMT6plex [N-Term]	1	2	1	G3UWB9	G3UWB9 [73-91]		1	2676.42							3	0.27	56.1867
	183	182.5	185.3	17.6	18.7	12.9	[R].VGSSFSTGQREPGENR.[V]	1xTMT6plex [N-Term]	1	2	1	G3UWB9	G3UWB9 [35-50]		1	1936.97	78.1	81.3	76.8	6.9	7.4	4.9	3	-3.27	38.972
	177.5	176	180.2	24	18.6	23.7	[K].CLPPPEAQTGQSQKPR.[R]	1xCarbamidomethyl [C1]; 1xTMT6plex [K14]; 1xTMT6plex [N-Term]	1	2	6	G3UWB9	G3UWB9 [168-183]		0	2252.22	222.2	230	219	27.6	21.6	26.4	3	-2.03	40.394
	162.9	139.4	137.4	65.9	45.7	48.6	[R].DEVQGNGCEQPSFQIK.[V]	1xCarbamidomethyl [C8]; 1xTMT6plex [K16]; 1xTMT6plex [N-Term]	1	2	1	G3UWB9	G3UWB9 [76-91]		0	2294.15	18.8	16.8	15.4	7	4.9	5	3	-3.76	53.3173
	169.4	168.1	172.3	27.2	31.2	31.9	[R].CPSVALAER.[N]	1xCarbamidomethyl [C1]; 1xTMT6plex [N-Term]	1	2	3	G3UWB9	G3UWB9 [55-63]		0	1231.67	386.6	400.4	381.8	57.1	66	64.8	2	-1.01	43.38
	159.1	156.3	156.9	39.2	45.6	42.9	[K].SSLQNESVKNP.[-]	1xTMT6plex [K9]; 1xTMT6plex [N-Term]	1	2	3	G3UWB9	G3UWB9 [189-199]		1	1660.93	58.7	60.2	56.2	13.3	15.6	14.1	2	0.53	42.513
	144	147.8	150.1	51.4	47.8	59	[R].IDGQNLTVTGQR.[Q]	1xTMT6plex [N-Term]	1	2	3	G3UWB9	G3UWB9 [106-117]		0	1530.84	64.6	69.2	65.4	21.2	19.9	23.6	3	-0.19	47.1299
	130.9	133.4	131.9	74.7	64.7	64.4	[R].NQVATLPVR.[L]	1xTMT6plex [N-Term]	1	2	2	G3UWB9	G3UWB9 [64-72]		0	1226.74	106	112.7	103.7	55.6	48.6	46.5	2	-0.78	43.925
	170.8	166.2	163.6	34.7	34.4	30.2	[R].VGSSFSTGQR.[E]	1xTMT6plex [N-Term]	1	2	1	G3UWB9	G3UWB9 [35-44]		0	1254.66	51.4	52.2	47.8	9.6	9.6	8.1	2	-3.99	40.0736
							[R].QHESNDPSR.[G]	1xTMT6plex [N-Term]	1	2	1	G3UWB9	G3UWB9 [118-126]		0	1298.63							3	-2.89	15.2019
163.6	162.9	161.4	37.6	37.1	37.4	Q64442	Sorbitol dehydrogenase OS=Mus musculus OX=10090 GN=Sord PE=1 SV=3	64	27	66	27	357	38.2	7.02	7874.9	8185.8	7543	1664.2	1658.4	1606
	Abundances (Grouped): F1, 126	Abundances (Grouped): F1, 127	Abundances (Grouped): F1, 128	Abundances (Grouped): F1, 129	Abundances (Grouped): F1, 130	Abundances (Grouped): F1, 131	Annotated Sequence	Modifications	# Protein Groups	# Proteins	# PSMs	Master Protein Accessions	Positions in Master Proteins	Modifications in Master Proteins	# Missed Cleavages	Theo. MH+ [Da]	Abundance: F1: 126, Sample	Abundance: F1: 127, Sample	Abundance: F1: 128, Sample	Abundance: F1: 129, Sample	Abundance: F1: 130, Sample	Abundance: F1: 131, Sample	Charge (by Search Engine): Sequest HT	DeltaM [ppm] (by Search Engine): Sequest HT	RT [min] (by Search Engine): Sequest HT
							[-].MAAPAKGENLSLVVHGPGDIRLENYPIPELGPNDVLLK.[M]	2xTMT6plex [K6; K38]; 1xTMT6plex [N-Term]; 1xMet-loss+Acetyl [N-Term]	1	1	1	Q64442	Q64442 [1-38]	Q64442 1xMet-loss+Acetyl [N-Term]	2	4635.61							5	-1.58	58.5399
							[K].MHSVGICGSDVHYWEHGR.[I]	1xCarbamidomethyl [C7]; 1xTMT6plex [N-Term]	1	1	2	Q64442	Q64442 [39-56]		0	2356.09							5	-0.15	48.3622
	112	126.7	124.5	78.6	71.1	87.1	[K].MHSVGICGSDVHYWEHGR.[I]	1xCarbamidomethyl [C7]; 1xOxidation [M1]; 1xTMT6plex [N-Term]	1	1	6	Q64442	Q64442 [39-56]		0	2372.09	35.5	41.9	38.3	22.9	20.9	24.6	5	-4.18	44.6893
	174.2	183.9	149.8	44.6	16.2	31.4	[K].GENLSLVVHGPGDIR.[L]	1xTMT6plex [N-Term]	1	1	1	Q64442	Q64442 [7-21]		0	1791.99	25.5	28.1	21.3	6	2.2	4.1	3	3.86	53.3699
	175.6	170.1	166.4	28.5	26.2	33.2	[R].RGSVSLGNK.[V]	1xTMT6plex [K9]; 1xTMT6plex [N-Term]	1	1	2	Q64442	Q64442 [167-175]		1	1375.84	259.7	262.6	239	38.8	35.9	43.8	3	-5.47	36.7721
	136.1	135.2	151.4	59.7	55.1	62.5	[K].AMGAAQVVVTDLSASR.[L]	1xOxidation [M2]; 1xTMT6plex [N-Term]	1	1	4	Q64442	Q64442 [194-209]		0	1820.97	157.8	163.6	170.5	63.7	59.3	64.6	3	0.48	57.01
	184.1	179.5	165.8	22.4	25.8	22.3	[K].AVEAFETAK.[K]	1xTMT6plex [K9]; 1xTMT6plex [N-Term]	1	1	2	Q64442	Q64442 [331-339]		0	1423.82	354	360.3	309.6	39.6	46.1	38.3	2	0.79	52.3435
	189.3	190.1	183.2	13.4	11.9	12.1	[K].AVEAFETAKK.[G]	2xTMT6plex [K9; K10]; 1xTMT6plex [N-Term]	1	1	3	Q64442	Q64442 [331-340]		1	1781.08	862.5	904	810.6	56	50.3	49	3	-1.45	49.6136
	165.3	170.2	171.3	31.3	31.8	30.2	[R].LENYPIPELGPNDVLLK.[M]	1xTMT6plex [K17]; 1xTMT6plex [N-Term]	1	1	1	Q64442	Q64442 [22-38]		0	2382.37	573.8	616.7	577.3	99.8	102.6	93.4	2	0.04	58.8753
							[R].IGDFVVKKPMVLGHEAAGTVTK.[V]	3xTMT6plex [K7; K8; K22]; 1xTMT6plex [N-Term]	1	1	1	Q64442	Q64442 [57-78]		1	3213.92							5	-2.83	57.4413
	139.3	143.1	140.5	59.4	60.8	56.9	[R].YNLTPTIFFCATPPDDGNLCR.[F]	2xCarbamidomethyl [C10; C20]; 1xTMT6plex [N-Term]	1	1	1	Q64442	Q64442 [111-131]		0	2701.3	212.7	228	208.3	83.4	86.2	77.5	3	-6.74	58.9186
	169.7	173.8	172.9	26.9	28.8	27.9	[K].AKEVGADFTIQVGK.[E]	2xTMT6plex [K2; K14]; 1xTMT6plex [N-Term]	1	1	1	Q64442	Q64442 [213-226]		1	2150.28	447.7	478.6	442.7	65.2	70.4	65.7	3	-3.21	55.2518
	186.2	184	168	20.9	21.2	19.7	[K].AKEVGADFTIQVGKETPQEIASK.[V]	3xTMT6plex [K2; K14; K23]; 1xTMT6plex [N-Term]	1	1	2	Q64442	Q64442 [213-235]		2	3362.93	372.4	384.1	326.2	38.4	39.4	35.2	4	-0.84	57.0381
	190.3	185.3	182.6	13.9	14.9	12.9	[K].TLNVKPLVTHR.[F]	1xTMT6plex [K5]; 1xTMT6plex [N-Term]	1	1	6	Q64442	Q64442 [315-325]		0	1736.09	222.6	226.2	207.4	14.9	16.2	13.5	3	-0.95	46.9254
	146.3	139.8	132.9	61.2	61.8	58	[K].TLNVKPLVTHRFPLEK.[A]	2xTMT6plex [K5; K16]; 1xTMT6plex [N-Term]	1	1	3	Q64442	Q64442 [315-330]		1	2579.6	371.7	370.6	327.9	142.9	145.7	131.3	5	-0.17	55.9032
	182.7	192.2	189.7	11.1	12.6	11.6	[R].VAIEPGVPREVDEYCK.[I]	1xCarbamidomethyl [C15]; 1xTMT6plex [K16]; 1xTMT6plex [N-Term]	1	1	2	Q64442	Q64442 [92-107]		1	2319.24	282	309.6	284.2	15.8	18.1	16	3	-0.19	54.4066
	134.3	134.3	126.6	71.7	65	68.1	[K].KPMVLGHEAAGTVTK.[V]	2xTMT6plex [K1; K15]; 1xTMT6plex [N-Term]	1	1	3	Q64442	Q64442 [64-78]		0	2226.32	315.2	329.1	288.7	154.8	141.6	142.5	4	-3.06	46.6316
	156	157.7	151.4	40.6	46.6	47.8	[K].KPMVLGHEAAGTVTK.[V]	1xOxidation [M3]; 2xTMT6plex [K1; K15]; 1xTMT6plex [N-Term]	1	1	1	Q64442	Q64442 [64-78]		0	2242.32	156.7	165.4	147.7	37.5	43.4	42.8	4	-1.35	42.5497
	144.5	142.9	146.5	55.2	53.3	57.5	[K].HLKPGDRVAIEPGVPR.[E]	1xTMT6plex [K3]; 1xTMT6plex [N-Term]	1	1	1	Q64442	Q64442 [85-100]		1	2199.31	191.5	197.7	188.5	67.3	65.6	67.9	5	-5.52	41.7209
	144.9	139.4	147.5	56.8	55.3	56.2	[R].YCNTWPMAISMLASK.[T]	1xCarbamidomethyl [C2]; 1xTMT6plex [K15]; 1xTMT6plex [N-Term]	1	1	1	Q64442	Q64442 [300-314]		0	2231.14	680.1	683	672.2	245.1	240.9	235	2	-9.07	59.1116
	169	176.9	192.4	19.9	20	21.8	[R].VAIEPGVPR.[E]	1xTMT6plex [N-Term]	1	1	4	Q64442	Q64442 [92-100]		0	1166.71	322	351.9	356	34.9	35.3	37.1	2	0.13	47.8385
	168.9	171.4	175.8	28.1	27.8	27.9	[K].ETPQEIASK.[V]	1xTMT6plex [K9]; 1xTMT6plex [N-Term]	1	1	3	Q64442	Q64442 [227-235]		0	1460.84	430.1	455.7	434.8	65.8	65.7	63.4	2	0.55	44.9853
							[K].HLKPGDRVAIEPGVPREVDEYCK.[I]	1xCarbamidomethyl [C22]; 2xTMT6plex [K3; K23]; 1xTMT6plex [N-Term]	1	1	1	Q64442	Q64442 [85-107]		2	3351.85							6	-2.2	49.2925
	184.9	173.4	186.6	18.8	17.2	19.1	[R].EVDEYCK.[I]	1xCarbamidomethyl [C6]; 1xTMT6plex [K7]; 1xTMT6plex [N-Term]	1	1	3	Q64442	Q64442 [101-107]		0	1400.71	170.2	166.6	166.8	15.9	14.7	15.7	2	2	43.5627
	165.1	156.5	166.2	37.8	39.3	35	[K].HNADFCYK.[L]	1xCarbamidomethyl [C6]; 1xTMT6plex [K8]; 1xTMT6plex [N-Term]	1	1	2	Q64442	Q64442 [135-142]		0	1512.77	58.8	58.2	57.5	12.4	13	11.1	3	-8.19	42.04
	119.1	117.4	123.5	80.6	79.3	80.1	[-].MAAPAKGENLSLVVHGPGDIR.[L]	1xTMT6plex [K6]; 1xTMT6plex [N-Term]; 1xMet-loss+Acetyl [N-Term]	1	1	1	Q64442	Q64442 [1-21]	Q64442 1xMet-loss+Acetyl [N-Term]	1	2501.42	130.3	134.1	131.2	81.1	80.5	78.1	4	0.55	51.7167
	179.2	185.4	171.4	20.7	22.2	21	[R].GSVSLGNK.[V]	1xTMT6plex [K8]; 1xTMT6plex [N-Term]	1	1	1	Q64442	Q64442 [168-175]		0	1219.74	403.8	436.2	375.1	42.9	46.5	42.2	2	-3.25	42.4965
							[K].CDPNDQNP.[-]	1xCarbamidomethyl [C1]; 1xTMT6plex [N-Term]	1	1	5	Q64442	Q64442 [350-357]		0	1188.52							2	0	30.8806
	160.5	152.9	150.1	45.6	45	45.8	[R].IGDFVVK.[K]	1xTMT6plex [K7]; 1xTMT6plex [N-Term]	1	1	2	Q64442	Q64442 [57-63]		0	1235.78	838.3	833.6	761.2	219.1	217.9	213.2	2	0.37	58.4074
163.5	162.4	165.2	37.2	35.5	36.2	A6H656	Outer dense fiber protein 1 OS=Mus musculus OX=10090 GN=Odf1 PE=2 SV=1	56	17	25	17	248	27.6	7.91	4765.2	4940.9	4674.5	995.8	959.9	939.5
	Abundances (Grouped): F1, 126	Abundances (Grouped): F1, 127	Abundances (Grouped): F1, 128	Abundances (Grouped): F1, 129	Abundances (Grouped): F1, 130	Abundances (Grouped): F1, 131	Annotated Sequence	Modifications	# Protein Groups	# Proteins	# PSMs	Master Protein Accessions	Positions in Master Proteins	Modifications in Master Proteins	# Missed Cleavages	Theo. MH+ [Da]	Abundance: F1: 126, Sample	Abundance: F1: 127, Sample	Abundance: F1: 128, Sample	Abundance: F1: 129, Sample	Abundance: F1: 130, Sample	Abundance: F1: 131, Sample	Charge (by Search Engine): Sequest HT	DeltaM [ppm] (by Search Engine): Sequest HT	RT [min] (by Search Engine): Sequest HT
	180.5	181.4	178.2	21	19	19.8	[R].SCGLCDLYYPCCLCDYK.[L]	5xCarbamidomethyl [C2; C5; C11; C12; C14]; 1xTMT6plex [K17]; 1xTMT6plex [N-Term]	1	2	1	A6H656	A6H656 [64-80]		0	2705.19	451.4	473.4	432.8	48.4	44.2	44.2	3	-1.25	58.5628
	176	172.5	178.7	24.3	24.6	23.9	[K].EFSLPPCVDEKDVTYSYGLGSCVK.[I]	2xCarbamidomethyl [C7; C22]; 2xTMT6plex [K11; K24]; 1xTMT6plex [N-Term]	1	2	2	A6H656	A6H656 [160-183]		1	3437.76	1561.3	1597.5	1539.3	198.5	202.3	188.7	3	-5.66	58.5089
	135.1	143.8	151	55.9	55	59.2	[K].KYSYMNICK.[E]	1xCarbamidomethyl [C8]; 2xTMT6plex [K1; K9]; 1xTMT6plex [N-Term]	1	2	1	A6H656	A6H656 [151-159]		1	1894.05	144.9	161	157.3	55.1	54.7	56.6	3	-0.93	52.1386
	128.4	132.2	135.8	70.6	63.8	69.2	[R].ILASSCCSSNILGSVNVCGFEPDQVK.[V]	3xCarbamidomethyl [C6; C7; C18]; 1xTMT6plex [K26]; 1xTMT6plex [N-Term]	1	2	3	A6H656	A6H656 [101-126]		0	3299.65	102.4	110.1	105.2	51.8	47.2	49.2	3	-6.6	58.7129
	144.2	152.6	157.9	49.4	45.8	50.1	[R].CLCDLYMHPYCCCDLHPYPYCLCYSK.[R]	7xCarbamidomethyl [C1; C3; C11; C12; C13; C21; C23]; 1xTMT6plex [K26]; 1xTMT6plex [N-Term]	1	2	1	A6H656	A6H656 [35-60]		0	4006.71	356.5	393.8	379	112.4	105	110.4	4	-2.49	58.3415
	167.3	167.2	160.4	37.2	30.8	37.2	[K].LYCLRPSLR.[S]	1xCarbamidomethyl [C3]; 1xTMT6plex [N-Term]	1	2	4	A6H656	A6H656 [81-89]		0	1406.81	220.1	229.6	204.9	45	37.6	43.6	3	0.4	52.0114
	172.1	175	167.4	30	28.9	26.6	[K].VCVSAERENRYDCLGSK.[K]	2xCarbamidomethyl [C2; C13]; 1xTMT6plex [K17]; 1xTMT6plex [N-Term]	1	2	1	A6H656	A6H656 [134-150]		2	2501.26	237.1	251.6	223.9	38	37	32.7	4	-0.99	45.4389
	123.9	121.3	131.6	75.9	75.6	71.7	[K].DVTYSYGLGSCVK.[I]	1xCarbamidomethyl [C11]; 1xTMT6plex [K13]; 1xTMT6plex [N-Term]	1	2	1	A6H656	A6H656 [171-183]		0	1907	236.2	241.4	243.6	133.2	133.8	121.9	3	0.95	54.8779
	180.8	173	166.2	29.5	27.9	22.6	[R].CIDEISSR.[C]	1xCarbamidomethyl [C1]; 1xTMT6plex [N-Term]	1	2	1	A6H656	A6H656 [27-34]		0	1208.61	78.1	78	69.7	11.7	11.2	8.7	2	-3.3	42.7285
	186.8	175.3	175	22.8	19.7	20.5	[R].ENRYDCLGSK.[K]	1xCarbamidomethyl [C6]; 1xTMT6plex [K10]; 1xTMT6plex [N-Term]	1	2	1	A6H656	A6H656 [141-150]		1	1699.88	163.8	160.5	149	18.4	16	16	3	2.5	41.8297
	164.3	158.5	174.2	26.5	37.6	38.9	[K].EFSLPPCVDEK.[D]	1xCarbamidomethyl [C7]; 1xTMT6plex [K11]; 1xTMT6plex [N-Term]	1	2	1	A6H656	A6H656 [160-170]		0	1778.94	60.7	61.1	62.5	9	12.9	12.8	3	0.48	58.3339
	186.1	172.4	160.7	25	32.8	23	[R].YDCLGSK.[K]	1xCarbamidomethyl [C3]; 1xTMT6plex [K7]; 1xTMT6plex [N-Term]	1	2	1	A6H656	A6H656 [144-150]		0	1300.7	103.4	100	86.7	12.8	16.9	11.4	2	-2.79	46.2922
							[K].DGKVCVSAER.[E]	1xCarbamidomethyl [C5]; 1xTMT6plex [K3]; 1xTMT6plex [N-Term]	1	2	1	A6H656	A6H656 [131-140]		1	1578.87							3	-3.13	36.7224
	142.3	139.6	144.3	59.8	55.6	58.4	[K].KYSYMNICK.[E]	1xCarbamidomethyl [C8]; 1xOxidation [M5]; 2xTMT6plex [K1; K9]; 1xTMT6plex [N-Term]	1	2	1	A6H656	A6H656 [151-159]		1	1910.05	354.4	363	349.1	137	128.5	129.6	3	-6.91	46.0566
							[K].VCVSAERENR.[Y]	1xCarbamidomethyl [C2]; 1xTMT6plex [N-Term]	1	2	1	A6H656	A6H656 [134-143]		1	1448.75							3	-9.97	31.9479
	181	172.5	169.5	27.9	23.5	25.6	[R].ENRYDCLGSKK.[Y]	1xCarbamidomethyl [C6]; 2xTMT6plex [K10; K11]; 1xTMT6plex [N-Term]	1	2	1	A6H656	A6H656 [141-151]		2	2057.14	250.1	248.7	227.4	35.4	30.1	31.5	4	-1.92	40.6038
	170.5	175.8	173	29.3	24.7	26.7	[K].VCVSAER.[E]	1xCarbamidomethyl [C2]; 1xTMT6plex [N-Term]	1	2	2	A6H656	A6H656 [134-140]		0	1049.56	325.2	349.8	320.3	51.4	43.7	45.4	2	-0.42	35.8113
	147.2	143.2	156.9	50.5	51.5	50.8	[K].YSYMNICK.[E]	1xCarbamidomethyl [C7]; 1xOxidation [M4]; 1xTMT6plex [K8]; 1xTMT6plex [N-Term]	1	2	1	A6H656	A6H656 [152-159]		0	1552.79	119.6	121.4	123.8	37.7	38.8	36.8	2	-3.74	49.1368
162.4	160.1	160	36.2	39.5	41.8	Q9D416	ADP-ribosylation factor-like protein 13A OS=Mus musculus OX=10090 GN=Arl13a PE=2 SV=1	4	2	2	2	372	43.4	9.42	371.4	382	355.1	76.2	83.8	85.2
	Abundances (Grouped): F1, 126	Abundances (Grouped): F1, 127	Abundances (Grouped): F1, 128	Abundances (Grouped): F1, 129	Abundances (Grouped): F1, 130	Abundances (Grouped): F1, 131	Annotated Sequence	Modifications	# Protein Groups	# Proteins	# PSMs	Master Protein Accessions	Positions in Master Proteins	Modifications in Master Proteins	# Missed Cleavages	Theo. MH+ [Da]	Abundance: F1: 126, Sample	Abundance: F1: 127, Sample	Abundance: F1: 128, Sample	Abundance: F1: 129, Sample	Abundance: F1: 130, Sample	Abundance: F1: 131, Sample	Charge (by Search Engine): Sequest HT	DeltaM [ppm] (by Search Engine): Sequest HT	RT [min] (by Search Engine): Sequest HT
	176.7	168.3	165.8	29	26.3	33.8	[R].VEPCSTIK.[R]	1xCarbamidomethyl [C4]; 1xTMT6plex [K8]; 1xTMT6plex [N-Term]	1	1	1	Q9D416	Q9D416 [162-169]		0	1391.8	95.5	94.9	87	14.4	13.2	16.3	2	1.26	44.8641
	158	157.5	158.1	38.5	43.6	44.3	[R].LIEAFQR.[L]	1xTMT6plex [N-Term]	1	1	1	Q9D416	Q9D416 [37-43]		0	1105.66	275.9	287.1	268.1	61.8	70.6	68.9	2	-6.15	55.8224
162	163.3	161.3	38.3	37.1	38	A0A0R4J0X7	Glyceraldehyde-3-phosphate dehydrogenase OS=Mus musculus OX=10090 GN=Gapdhs PE=1 SV=1	61	18	27	16	438	47.4	7.91	5119.3	5384.2	4949.1	1112.1	1087.8	1070.3
	Abundances (Grouped): F1, 126	Abundances (Grouped): F1, 127	Abundances (Grouped): F1, 128	Abundances (Grouped): F1, 129	Abundances (Grouped): F1, 130	Abundances (Grouped): F1, 131	Annotated Sequence	Modifications	# Protein Groups	# Proteins	# PSMs	Master Protein Accessions	Positions in Master Proteins	Modifications in Master Proteins	# Missed Cleavages	Theo. MH+ [Da]	Abundance: F1: 126, Sample	Abundance: F1: 127, Sample	Abundance: F1: 128, Sample	Abundance: F1: 129, Sample	Abundance: F1: 130, Sample	Abundance: F1: 131, Sample	Charge (by Search Engine): Sequest HT	DeltaM [ppm] (by Search Engine): Sequest HT	RT [min] (by Search Engine): Sequest HT
							[R].RVVVTAPSPDAPMFVMGVNEK.[D]	1xTMT6plex [K21]; 1xTMT6plex [N-Term]	1	3	1	A0A0R4J0X7	A0A0R4J0X7 [219-239]		1	2702.48							3	-9.77	58.3025
	142.4	138.9	160	56.3	48.7	53.6	[R].RVVVTAPSPDAPMFVMGVNEK.[D]	1xOxidation [M13]; 1xTMT6plex [K21]; 1xTMT6plex [N-Term]	1	3	1	A0A0R4J0X7	A0A0R4J0X7 [219-239]		1	2718.47	95.4	97.1	104.1	34.7	30.3	32	3	-0.34	56.4916
	172.5	173.8	175.7	26.1	24.9	27.1	[K].LVAWYDNEYGYSNR.[V]	1xTMT6plex [N-Term]	1	3	1	A0A0R4J0X7	A0A0R4J0X7 [412-425]		0	1978.95	295.1	310.3	291.9	41	39.6	41.3	2	1.04	58.6201
	134.2	161	164	55	45	40.9	[K].DYNPGSMTIVSNASCTTNCLAPLAK.[V]	2xCarbamidomethyl [C15; C19]; 1xOxidation [M7]; 1xTMT6plex [K25]; 1xTMT6plex [N-Term]	1	3	2	A0A0R4J0X7	A0A0R4J0X7 [240-264]		0	3159.55	67.4	84.4	80	25.4	21	18.3	3	-2.72	58.0441
	136.9	141.9	135.8	64	58.5	62.9	[R].DVVLTNVTVVQLRR.[D]	1xTMT6plex [N-Term]	1	3	1	A0A0R4J0X7	A0A0R4J0X7 [5-18]		1	1841.12	144.4	156.2	139.1	62.1	57.3	59.1	3	-5.89	55.6415
	177	163	177.7	36.2	27	19.2	[R].DRCPCPCPCPCPCPVIRPPPPK.[V]	6xCarbamidomethyl [C3; C5; C7; C9; C11; C13]; 1xTMT6plex [K22]; 1xTMT6plex [N-Term]	1	1	1	A0A0R4J0X7	A0A0R4J0X7 [19-40]		1	3175.53	60.1	57.8	58.6	11.3	8.5	5.8	4	-3.28	45.2491
	147.5	143.7	144.2	57.4	56.1	51.1	[K].NGQLVVDNLEINTYQCKDPK.[E]	1xCarbamidomethyl [C16]; 2xTMT6plex [K17; K20]; 1xTMT6plex [N-Term]	1	3	1	A0A0R4J0X7	A0A0R4J0X7 [165-184]		1	3035.64	396.5	403.3	376.4	142	139.9	122.4	4	1.93	57.3725
	143.9	150.2	141.6	44	40.8	79.5	[R].GAHQNIIPSSTGAAK.[A]	1xTMT6plex [K15]; 1xTMT6plex [N-Term]	1	3	2	A0A0R4J0X7	A0A0R4J0X7 [303-317]		0	1910.09	110.5	120.4	105.6	31.1	29.1	54.4	3	-0.48	41.5122
	145.5	156.2	157	44.6	48.7	47.9	[K].GPLAGILAYTEDQVVSTDFNGNPHSSIFDAK.[A]	1xTMT6plex [K31]; 1xTMT6plex [N-Term]	1	3	1	A0A0R4J0X7	A0A0R4J0X7 [370-400]		0	3721.91	175.4	196.6	183.8	49.5	54.5	51.5	4	-1.94	59.1449
	181.6	177.2	167.6	25	26.2	22.5	[R].LAKPASYSAITEAVK.[A]	2xTMT6plex [K3; K15]; 1xTMT6plex [N-Term]	1	3	1	A0A0R4J0X7	A0A0R4J0X7 [351-365]		0	2236.35	544.3	554.3	487.7	68.8	72.9	60.1	3	-3.93	55.4143
	133.2	139	138	64.3	63.8	61.7	[R].VPTPNVSVVDLTCR.[L]	1xCarbamidomethyl [C13]; 1xTMT6plex [N-Term]	2	7	1	A0A0R4J0X7; P16858	A0A0R4J0X7 [337-350]; P16858 [233-246]		0	1785.97	172.2	187.5	173.1	76.4	76.5	71.1	2	-2.76	58.0604
	151.1	152.5	146.2	51.5	49.1	49.6	[K].VIHENFGIVEGLMTTVHSYTATQK.[T]	1xTMT6plex [K24]; 1xTMT6plex [N-Term]	1	3	1	A0A0R4J0X7	A0A0R4J0X7 [265-288]		0	3133.68	312.2	328.8	293.4	97.8	94.2	91.4	4	-5.87	58.7698
	177.9	184.6	180	18.1	16.8	22.7	[R].VVAVNDPFIDPEYMVYMFK.[Y]	1xTMT6plex [K19]; 1xTMT6plex [N-Term]	1	3	2	A0A0R4J0X7	A0A0R4J0X7 [131-149]		0	2735.42	387.7	420.1	380.9	36.2	34	44.1	3	-1.49	59.4669
	152.5	150.8	157.4	48.2	41.8	49.3	[R].VVAVNDPFIDPEYMVYMFK.[Y]	1xOxidation [M]; 1xTMT6plex [K19]; 1xTMT6plex [N-Term]	1	3	2	A0A0R4J0X7	A0A0R4J0X7 [131-149]		0	2751.42	261.7	270.1	262.2	76.1	66.5	75.4	3	-0.81	59.199
	151	165	154.4	41.7	47.1	40.8	[R].VVVTAPSPDAPMFVMGVNEK.[D]	1xTMT6plex [K20]; 1xTMT6plex [N-Term]	1	3	1	A0A0R4J0X7	A0A0R4J0X7 [220-239]		0	2546.38	298	339.8	295.8	75.6	86.3	71.7	3	-1.98	58.6853
	177.3	174.6	173.6	25.7	24.3	24.5	[K].AGIALNDNFVK.[L]	1xTMT6plex [K11]; 1xTMT6plex [N-Term]	1	3	2	A0A0R4J0X7	A0A0R4J0X7 [401-411]		0	1619.95	1400.3	1439.3	1331.2	186.3	177.8	172.1	2	-2.83	57.1295
	168.2	171.7	164.9	34.1	30.2	30.9	[R].ELTVGINGFGR.[I]	1xTMT6plex [N-Term]	1	3	1	A0A0R4J0X7	A0A0R4J0X7 [105-115]		0	1391.78	344.1	366.8	327.7	64.1	57.3	56.4	2	-7.18	57.4298
	126.8	130	141.2	62.7	72.8	66.5	[K].NGQLVVDNLEINTYQCK.[D]	1xCarbamidomethyl [C16]; 1xTMT6plex [K17]; 1xTMT6plex [N-Term]	1	3	1	A0A0R4J0X7	A0A0R4J0X7 [165-181]		0	2466.31	92.8	99.3	100.3	42.2	49.4	43.4	3	-1.31	58.3857
	123.1	130.2	113.6	74.2	75.5	83.2	[K].LTGMAFR.[V]	1xTMT6plex [N-Term]	2	8	2	A0A0R4J0X7; P16858	A0A0R4J0X7 [330-336]; P16858 [226-232]		0	1024.58	77	85	69	42.7	43.8	46.4	2	-0.49	53.9827
	99.1	103.6	102.5	95.5	92.8	106.4	[K].DYNPGSMTIVSNASCTTNCLAPLAK.[V]	2xCarbamidomethyl [C15; C19]; 1xTMT6plex [K25]; 1xTMT6plex [N-Term]	1	3	1	A0A0R4J0X7	A0A0R4J0X7 [240-264]		0	3143.56	65.7	71.7	66	58.2	57.1	62.9	3	-3.31	58.4189
	175.4	168.5	171.8	27.3	33.8	23.2	[K].GKLTGMAFR.[V]	1xTMT6plex [K2]; 1xTMT6plex [N-Term]	1	3	1	A0A0R4J0X7	A0A0R4J0X7 [328-336]		1	1438.86	67.7	67.9	64.4	9.7	12.1	8	3	1.27	50.3556
159.9	159.3	159.4	40.9	40.2	40.3	A0A1W2P7K9	Cytosolic 5'-nucleotidase 1B OS=Mus musculus OX=10090 GN=Nt5c1b PE=4 SV=1	40	28	31	28	615	70	8.66	5629.9	5856.3	5450.6	1323.8	1313.6	1264.5
	Abundances (Grouped): F1, 126	Abundances (Grouped): F1, 127	Abundances (Grouped): F1, 128	Abundances (Grouped): F1, 129	Abundances (Grouped): F1, 130	Abundances (Grouped): F1, 131	Annotated Sequence	Modifications	# Protein Groups	# Proteins	# PSMs	Master Protein Accessions	Positions in Master Proteins	Modifications in Master Proteins	# Missed Cleavages	Theo. MH+ [Da]	Abundance: F1: 126, Sample	Abundance: F1: 127, Sample	Abundance: F1: 128, Sample	Abundance: F1: 129, Sample	Abundance: F1: 130, Sample	Abundance: F1: 131, Sample	Charge (by Search Engine): Sequest HT	DeltaM [ppm] (by Search Engine): Sequest HT	RT [min] (by Search Engine): Sequest HT
	148.2	168.8	227.1	17.4	18.8	19.7	[K].EGIASATMYAGAK.[D]	1xTMT6plex [K13]; 1xTMT6plex [N-Term]	1	8	1	A0A1W2P7K9	A0A1W2P7K9 [444-456]		0	1727.94	166.4	197.9	247.6	18	19.6	19.7	2	-8.16	52.4174
							[R].DLQLRDYAYSCDSR.[E]	1xCarbamidomethyl [C11]; 1xTMT6plex [N-Term]	1	18	1	A0A1W2P7K9	A0A1W2P7K9 [229-242]		1	1990.95							3	-0.36	51.9004
	178.9	179.7	169.9	28.4	19.5	23.6	[R].NTAIKVEAPNSSTTSR.[T]	1xTMT6plex [K5]; 1xTMT6plex [N-Term]	1	15	1	A0A1W2P7K9	A0A1W2P7K9 [141-156]		1	2134.19	149.5	156.8	137.9	21.8	15.1	17.6	3	0.31	40.7563
	190.6	194.2	190.1	8.3	7.5	9.4	[R].KIYEEEGLEK.[Y]	2xTMT6plex [K1; K10]; 1xTMT6plex [N-Term]	1	15	1	A0A1W2P7K9	A0A1W2P7K9 [328-337]		1	1925.12	122.9	130.7	119	4.9	4.5	5.4	3	-0.39	49.7454
	92.4	79.1	89	122.5	112.6	104.3	[K].SSIQQTPQNRPITQLESQPPTPPETEPNSRR.[T]	1xTMT6plex [N-Term]	1	18	1	A0A1W2P7K9	A0A1W2P7K9 [177-207]		1	3742.93	16.9	15.1	15.8	20.6	19.1	17	4	-5.52	46.7742
	139.4	145.7	142.9	58.1	57.5	56.4	[K].FGTITAHVPYGIAQK.[R]	1xTMT6plex [K15]; 1xTMT6plex [N-Term]	1	7	1	A0A1W2P7K9	A0A1W2P7K9 [599-613]		0	2061.19	315	343.5	313.5	120.7	120.6	113.5	3	-3.4	57.4873
	194	179.4	194		13.8	18.8	[R].CLCAAEGTSPCR.[T]	3xCarbamidomethyl [C1; C3; C11]; 1xTMT6plex [N-Term]	1	5	1	A0A1W2P7K9	A0A1W2P7K9 [66-77]		0	1610.73	34.8	33.6	33.8		2.3	3	2	-3.74	40.2111
	168.5	166.7	170.2	30.1	30.2	34.4	[R].ALFNMVDDRK.[I]	1xTMT6plex [K10]; 1xTMT6plex [N-Term]	1	15	1	A0A1W2P7K9	A0A1W2P7K9 [319-328]		1	1666.94	394.4	407.3	386.9	64.8	65.5	71.8	3	-4.57	55.9248
							[R].LQYGTSVDMEPEYISDGPQQR.[Q]	1xOxidation [M9]; 1xTMT6plex [N-Term]	1	18	1	A0A1W2P7K9	A0A1W2P7K9 [267-287]		0	2658.26							3	3.82	54.85
							[R].TPPTEWKPYAQRR.[L]	1xTMT6plex [K7]; 1xTMT6plex [N-Term]	1	18	1	A0A1W2P7K9	A0A1W2P7K9 [254-266]		1	2088.18							4	-4.38	44.8571
	148.4	153.6	148.9	49	50.7	49.4	[R].TPPTEWKPYAQR.[R]	1xTMT6plex [K7]; 1xTMT6plex [N-Term]	1	18	1	A0A1W2P7K9	A0A1W2P7K9 [254-265]		0	1932.07	415.4	448.7	404.6	126.1	131.8	123.3	3	-6.29	48.5284
							[K].SSIQQTPQNRPITQLESQPPTPPETEPNSR.[R]	1xTMT6plex [N-Term]	1	18	1	A0A1W2P7K9	A0A1W2P7K9 [177-206]		0	3586.83							3	-2.05	48.8361
	174.5	185.5	162.5	24	30.4	23.1	[K].DMAYCDTQLR.[V]	1xCarbamidomethyl [C5]; 1xTMT6plex [N-Term]	1	8	1	A0A1W2P7K9	A0A1W2P7K9 [457-466]		0	1501.7	22.9	25.4	20.7	2.9	3.7	2.7	2	0.25	46.9416
							[R].RLQYGTSVDMEPEYISDGPQQR.[Q]	1xTMT6plex [N-Term]	1	18	1	A0A1W2P7K9	A0A1W2P7K9 [266-287]		1	2798.36							3	0.66	54.1019
	119.3	132.9	119.8	74.6	81.4	71.9	[K].MYTGSDPWAHR.[E]	1xTMT6plex [N-Term]	1	18	1	A0A1W2P7K9	A0A1W2P7K9 [212-222]		0	1549.74	24	27.9	23.4	13.8	15.2	12.9	3	-6.19	49.5058
	168.4	155.8	177.3	28.9	34.8	34.8	[K].IYEEEGLEK.[Y]	1xTMT6plex [K9]; 1xTMT6plex [N-Term]	1	15	2	A0A1W2P7K9	A0A1W2P7K9 [329-337]		0	1567.86	26.6	25.7	27.2	4.2	5.1	4.9	2	1.03	53.1235
	112.8	107	101.6	86	99.3	93.2	[R].SPSTGAPSVDEPR.[S]	1xTMT6plex [N-Term]	1	17	2	A0A1W2P7K9	A0A1W2P7K9 [126-138]		0	1528.78	51.9	51.4	45.4	36.4	42.4	38.2	2	0.7	38.254
	203.2	201	190.1	2.7	3.1		[K].ESLDAEK.[R]	1xTMT6plex [K7]; 1xTMT6plex [N-Term]	1	16	1	A0A1W2P7K9	A0A1W2P7K9 [21-27]		0	1249.7	338.7	349.6	307.6	4.1	4.8		2	1.09	41.7356
	174	174.6	173.9	26.4	25.7	25.4	[K].SFLEDLGK.[L]	1xTMT6plex [K8]; 1xTMT6plex [N-Term]	1	7	1	A0A1W2P7K9	A0A1W2P7K9 [511-518]		0	1366.8	1556.9	1630.7	1510.2	217.2	213.5	202.3	2	0.83	58.6498
							[R].LQYGTSVDMEPEYISDGPQQR.[Q]	1xTMT6plex [N-Term]	1	18	1	A0A1W2P7K9	A0A1W2P7K9 [267-287]		0	2642.26							3	4.65	57.9319
							[K].DHGLDK.[F]	1xTMT6plex [K6]; 1xTMT6plex [N-Term]	1	9	1	A0A1W2P7K9	A0A1W2P7K9 [486-491]		0	1142.66							3	-3.75	33.373
							[K].MYTGSDPWAHRENR.[E]	1xOxidation [M1]; 1xTMT6plex [N-Term]	1	18	1	A0A1W2P7K9	A0A1W2P7K9 [212-225]		1	1964.92							4	-0.48	39.8525
	106.5	111.5	113.4	85.5	92.8	90.3	[R].ALFNMVDDR.[K]	1xTMT6plex [N-Term]	1	15	1	A0A1W2P7K9	A0A1W2P7K9 [319-327]		0	1309.68	202.5	221.3	209.3	149.6	163.7	153.1	2	0.44	58.5355
							[R].AGYPNHSLR.[C]	1xTMT6plex [N-Term]	1	5	1	A0A1W2P7K9	A0A1W2P7K9 [45-53]		0	1243.67							3	-1.26	32.6948
	150.1	152.3	144.8	53.3	49.3	50.3	[K].SPIGYLK.[A]	1xTMT6plex [K7]; 1xTMT6plex [N-Term]	1	10	1	A0A1W2P7K9	A0A1W2P7K9 [417-423]		0	1235.78	637.3	675	597.1	208.3	194.1	190.3	2	-1.44	54.2026
							[K].MYTGSDPWAHRENREPR.[D]	1xOxidation [M1]; 1xTMT6plex [N-Term]	1	18	1	A0A1W2P7K9	A0A1W2P7K9 [212-228]		2	2347.12							5	-0.17	37.942
	133.5	127	135	72	63.7	68.9	[R].TYLVTAR.[S]	1xTMT6plex [N-Term]	1	8	1	A0A1W2P7K9	A0A1W2P7K9 [536-542]		0	1052.63	229.8	228.2	225.7	114	101.8	105.7	2	-2.73	44.4396
	169.9	157.4	157	39.7	37.9	38.1	[R].FCLTGGK.[S]	1xCarbamidomethyl [C2]; 1xTMT6plex [K7]; 1xTMT6plex [N-Term]	1	10	1	A0A1W2P7K9	A0A1W2P7K9 [410-416]		0	1240.71	894.8	865.2	803	192.2	185.4	178.7	2	-4	52.5631
	198.1	144.9	153	31	39.5	33.5	[K].ESLDAEKR.[K]	1xTMT6plex [K7]; 1xTMT6plex [N-Term]	1	16	1	A0A1W2P7K9	A0A1W2P7K9 [21-28]		1	1405.81	29.2	22.3	21.9	4.2	5.4	4.4	3	-1.16	36.7647
159.8	143.6	137.4	41.7	44.8	72.6	Q8K168	RIKEN cDNA 1700001C19 gene OS=Mus musculus OX=10090 GN=1700001C19Rik PE=2 SV=1	13	2	2	2	210	23.7	9.61	24.2	22.7	20.2	5.8	6.3	9.8
	Abundances (Grouped): F1, 126	Abundances (Grouped): F1, 127	Abundances (Grouped): F1, 128	Abundances (Grouped): F1, 129	Abundances (Grouped): F1, 130	Abundances (Grouped): F1, 131	Annotated Sequence	Modifications	# Protein Groups	# Proteins	# PSMs	Master Protein Accessions	Positions in Master Proteins	Modifications in Master Proteins	# Missed Cleavages	Theo. MH+ [Da]	Abundance: F1: 126, Sample	Abundance: F1: 127, Sample	Abundance: F1: 128, Sample	Abundance: F1: 129, Sample	Abundance: F1: 130, Sample	Abundance: F1: 131, Sample	Charge (by Search Engine): Sequest HT	DeltaM [ppm] (by Search Engine): Sequest HT	RT [min] (by Search Engine): Sequest HT
	159.8	143.6	137.4	41.7	44.8	72.6	[R].GQNPDTSIR.[FA]	1xTMT6plex [N-Term]	1	3	1	Q8K168	Q8K168 [152-160]		0	1216.65	24.2	22.7	20.2	5.8	6.3	9.8	2	0.43	32.0455
							[R].DREQTLEAAYVPVVVDPR.[G]	1xTMT6plex [N-Term]	1	3	1	Q8K168	Q8K168 [134-151]		1	2286.23							3	2.36	56.2664
158.9	128.7	113	74.1	50	75.4	P70675	Testis-specific protein TSX OS=Mus musculus OX=10090 GN=Tsx PE=1 SV=1	22	1	1	1	144	16	3.89	16.8	14.2	11.6	7.2	4.9	7.1
	Abundances (Grouped): F1, 126	Abundances (Grouped): F1, 127	Abundances (Grouped): F1, 128	Abundances (Grouped): F1, 129	Abundances (Grouped): F1, 130	Abundances (Grouped): F1, 131	Annotated Sequence	Modifications	# Protein Groups	# Proteins	# PSMs	Master Protein Accessions	Positions in Master Proteins	Modifications in Master Proteins	# Missed Cleavages	Theo. MH+ [Da]	Abundance: F1: 126, Sample	Abundance: F1: 127, Sample	Abundance: F1: 128, Sample	Abundance: F1: 129, Sample	Abundance: F1: 130, Sample	Abundance: F1: 131, Sample	Charge (by Search Engine): Sequest HT	DeltaM [ppm] (by Search Engine): Sequest HT	RT [min] (by Search Engine): Sequest HT
	158.9	128.7	113	74.1	50	75.4	[R].VSSTDDEDTCQAGCTEDDETSHSDRDIDNNVK.[V]	2xCarbamidomethyl [C10; C14]; 1xTMT6plex [K32]; 1xTMT6plex [N-Term]	1	1	1	P70675	P70675 [72-103]		1	4073.75	16.8	14.2	11.6	7.2	4.9	7.1	4	-3.16	41.77
157.4	159.3	155.5	43.4	42.3	42.1	P48774	Glutathione S-transferase Mu 5 OS=Mus musculus OX=10090 GN=Gstm5 PE=1 SV=1	68	23	77	21	224	26.6	7.21	13391.9	14143.2	12846.4	3395.4	3337.3	3190.5
	Abundances (Grouped): F1, 126	Abundances (Grouped): F1, 127	Abundances (Grouped): F1, 128	Abundances (Grouped): F1, 129	Abundances (Grouped): F1, 130	Abundances (Grouped): F1, 131	Annotated Sequence	Modifications	# Protein Groups	# Proteins	# PSMs	Master Protein Accessions	Positions in Master Proteins	Modifications in Master Proteins	# Missed Cleavages	Theo. MH+ [Da]	Abundance: F1: 126, Sample	Abundance: F1: 127, Sample	Abundance: F1: 128, Sample	Abundance: F1: 129, Sample	Abundance: F1: 130, Sample	Abundance: F1: 131, Sample	Charge (by Search Engine): Sequest HT	DeltaM [ppm] (by Search Engine): Sequest HT	RT [min] (by Search Engine): Sequest HT
	143.6	142.5	144.7	55.2	55.7	58.3	[K].RYICGEAPDYDRSQWLDVK.[F]	1xCarbamidomethyl [C4]; 1xTMT6plex [K19]; 1xTMT6plex [N-Term]	1	3	2	P48774	P48774 [35-53]		2	2829.44	251.3	260.3	245.8	88.8	90.5	90.9	4	-0.77	55.5385
	148.5	148	153.9	50	57.6	42	[K].LTFVDFLTYDVLDQNR.[I]	1xTMT6plex [N-Term]	1	3	8	P48774	P48774 [156-171]		0	2188.15	250.6	260.6	252.2	77.6	90.2	63.2	2	-1.7	59.6437
	170.5	170.8	169.2	30.6	29.4	29.5	[K].LTFVDFLTYDVLDQNRIFEPK.[C]	1xTMT6plex [K21]; 1xTMT6plex [N-Term]	1	3	3	P48774	P48774 [156-176]		1	3031.65	1554.4	1624.9	1497.6	257	249.1	239.6	3	-4.44	59.4999
	156.2	165.8	157.6	41.6	39.4	39.3	[K].FKLDLDFPNLPYLMDGK.[N]	2xTMT6plex [K2; K17]; 1xTMT6plex [N-Term]	1	2	7	P48774	P48774 [54-70]		1	2713.52	1971.3	2183.1	1930.4	483	461.7	442.4	3	1.21	59.1607
	143.9	148.7	160.1	47	49.8	50.5	[R].MLLEFTDTSYEEK.[R]	1xTMT6plex [K13]; 1xTMT6plex [N-Term]	1	4	1	P48774	P48774 [22-34]		0	2064.06	157.7	170.1	170.3	47.4	50.6	49.3	2	-1.22	58.8482
	155	150.8	156.2	48.2	42.7	47.2	[R].MLLEFTDTSYEEKR.[Y]	1xOxidation [M1]; 1xTMT6plex [K13]; 1xTMT6plex [N-Term]	1	4	3	P48774	P48774 [22-35]		1	2236.16	385.5	391.6	377.3	110.2	98.5	104.6	3	1.11	57.6115
	157.8	167.3	165.3	36.2	38.2	35.4	[K].IAAFLQSDRFFK.[M]	1xTMT6plex [K12]; 1xTMT6plex [N-Term]	1	2	2	P48774	P48774 [197-208]		1	1901.1	385.9	427.1	392.6	81.4	86.6	77.1	3	-0.82	58.7555
	155.7	143.4	147.5	52.6	48.3	52.5	[R].YICGEAPDYDR.[S]	1xCarbamidomethyl [C3]; 1xTMT6plex [N-Term]	1	3	7	P48774	P48774 [36-46]		0	1587.73	255.5	245.7	235	79.4	73.5	76.8	2	0.06	47.7812
	172.7	166.7	178.4	27.9	27.4	26.9	[R].YICGEAPDYDRSQWLDVK.[F]	1xCarbamidomethyl [C3]; 1xTMT6plex [K18]; 1xTMT6plex [N-Term]	1	3	1	P48774	P48774 [36-53]		1	2673.34	503.7	507.5	505.2	74.8	74.1	69.9	3	0.5	58.2456
	174	150.4	147.5	20.1	60.6	47.5	[R].KHNMCGDTEEEKIR.[V]	1xCarbamidomethyl [C5]; 2xTMT6plex [K1; K12]; 1xTMT6plex [N-Term]	1	3	2	P48774	P48774 [86-99]		2	2434.28	22.6	20.4	18.6	2.4	7.3	5.5	5	-0.53	36.7245
	156.1	150.1	157.9	46.1	43.9	45.8	[R].MLLEFTDTSYEEK.[R]	1xOxidation [M1]; 1xTMT6plex [K13]; 1xTMT6plex [N-Term]	1	4	2	P48774	P48774 [22-34]		0	2080.06	739	741.7	725.9	200.6	192.8	193.3	2	-1.48	58.5281
	170	150.2	157.2	39.4	41.1	42.2	[R].KHNMCGDTEEEK.[I]	1xCarbamidomethyl [C5]; 2xTMT6plex [K1; K12]; 1xTMT6plex [N-Term]	1	3	3	P48774	P48774 [86-97]		1	2165.09	99	91.3	88.9	21.1	22.2	21.9	4	-1.92	34.3719
	162	163.9	156.5	41.3	41.1	35.4	[K].NKITQSNAILR.[Y]	1xTMT6plex [K2]; 1xTMT6plex [N-Term]	1	3	4	P48774	P48774 [71-81]		1	1716.05	637.4	673.1	597.9	149.3	149.9	124	2	-7.6	43.8526
	162.6	167.5	158.1	37.9	37.2	36.7	[K].SMVLGYWDIR.[G]	1xTMT6plex [N-Term]	1	4	3	P48774	P48774 [5-14]		0	1468.78	3873	4163.6	3656.2	829.1	821.4	778.4	2	1.61	58.8445
	118.9	132.1	147.4	71.8	71.8	57.9	[K].RYICGEAPDYDR.[S]	1xCarbamidomethyl [C4]; 1xTMT6plex [N-Term]	1	3	3	P48774	P48774 [35-46]		1	1743.83	18.2	21.1	21.9	10.1	10.2	7.9	2	-2.09	42.2536
							[K].HNMCGDTEEEK.[I]	1xCarbamidomethyl [C4]; 1xTMT6plex [K11]; 1xTMT6plex [N-Term]	1	3	5	P48774	P48774 [87-97]		0	1807.84							3	-2.27	33.2453
	123.2	125.5	120.9	77.8	74.4	78.2	[K].ITQSNAILR.[Y]	1xTMT6plex [N-Term]	5	15	4	Q8R5I6; P48774; P10649; P15626; Q80W21	Q8R5I6 [70-78]; P48774 [73-81]; P10649 [70-78]; P15626 [70-78]; Q80W21 [70-78]		0	1244.75	531.8	565.4	506.6	308.9	298.1	301	2	-0.26	47.5687
	142.7	129.2	130.8	61	71.7	64.7	[K].FTWFAGEK.[L]	1xTMT6plex [K8]; 1xTMT6plex [N-Term]	1	3	1	P48774	P48774 [148-155]		0	1443.8	61.6	58.2	54.8	24.2	28.7	24.9	2	0.83	58.7493
	141.9	141.7	135	63.1	58.8	59.6	[K].IAAFLQSDR.[F]	1xTMT6plex [N-Term]	1	2	3	P48774	P48774 [197-205]		0	1249.71	1322.6	1377.7	1221.1	540.7	508.3	494.7	2	-4.99	58.199
							[R].KHNMCGDTEEEKIR.[V]	1xCarbamidomethyl [C5]; 1xOxidation [M4]; 2xTMT6plex [K1; K12]; 1xTMT6plex [N-Term]	1	3	2	P48774	P48774 [86-99]		2	2450.27							5	-3.33	33.1808
							[K].HNMCGDTEEEKIR.[V]	1xCarbamidomethyl [C4]; 1xOxidation [M3]; 1xTMT6plex [K11]; 1xTMT6plex [N-Term]	1	3	2	P48774	P48774 [87-99]		1	2093.02							4	4.17	32.8439
							[K].HNMCGDTEEEK.[I]	1xCarbamidomethyl [C4]; 1xOxidation [M3]; 1xTMT6plex [K11]; 1xTMT6plex [N-Term]	1	3	2	P48774	P48774 [87-97]		0	1823.83							3	-0.6	31.2244
	135.8	144.5	143.3	56.2	55.6	64.6	[K].SMVLGYWDIR.[G]	1xOxidation [M2]; 1xTMT6plex [N-Term]	1	4	1	P48774	P48774 [5-14]		0	1484.78	257.8	286.3	264.1	98.2	97.9	109.4	2	-3.11	58.5596
	181.1	163.3	151.6	65.3	38.6		[K].HNMCGDTEEEKIR.[V]	1xCarbamidomethyl [C4]; 1xTMT6plex [K11]; 1xTMT6plex [N-Term]	1	3	2	P48774	P48774 [87-99]		1	2077.02	18.7	17.6	15.2	6.2	3.7		4	1.05	36.9609
	150.1	142.2	141.3	54.1	55.7	56.6	[R].SQWLDVK.[F]	1xTMT6plex [K7]; 1xTMT6plex [N-Term]	1	3	1	P48774	P48774 [47-53]		0	1333.79	609.2	602.6	556.9	201.8	209.6	204.9	2	-3.37	56.0553
							[K].CLDEFPNLK.[A]	1xCarbamidomethyl [C1]; 1xTMT6plex [K9]; 1xTMT6plex [N-Term]	1	3	1	P48774	P48774 [177-185]		0	1593.87							2	0.5	61.354
							[R].GLAHAIR.[LM]	1xTMT6plex [N-Term]	4	8	1	Q8R5I6; P48774; P15626; Q80W21	Q8R5I6 [12-18]; P48774 [15-21]; P15626 [12-18]; Q80W21 [12-18]		0	966.605							2	-2.26	32.411
	110.7	117.4	124.8	86.2	74.1	86.7	[R].VDIMENQIMDFR.[M]	2xOxidation [M4; M9]; 1xTMT6plex [N-Term]	1	3	1	P48774	P48774 [100-111]		0	1771.86	16.9	18.7	18.5	12.1	10.5	11.8	2	2.5	55.8088
156	136.5	133.6	53.5	57.6	62.8	F6UTM6	Group XIIB secretory phospholipase A2-like protein (Fragment) OS=Mus musculus OX=10090 GN=Pla2g12b PE=1 SV=1	17	1	1	1	101	11	8.18	18.4	16.8	15.3	5.8	6.3	6.6
	Abundances (Grouped): F1, 126	Abundances (Grouped): F1, 127	Abundances (Grouped): F1, 128	Abundances (Grouped): F1, 129	Abundances (Grouped): F1, 130	Abundances (Grouped): F1, 131	Annotated Sequence	Modifications	# Protein Groups	# Proteins	# PSMs	Master Protein Accessions	Positions in Master Proteins	Modifications in Master Proteins	# Missed Cleavages	Theo. MH+ [Da]	Abundance: F1: 126, Sample	Abundance: F1: 127, Sample	Abundance: F1: 128, Sample	Abundance: F1: 129, Sample	Abundance: F1: 130, Sample	Abundance: F1: 131, Sample	Charge (by Search Engine): Sequest HT	DeltaM [ppm] (by Search Engine): Sequest HT	RT [min] (by Search Engine): Sequest HT
	156	136.5	133.6	53.5	57.6	62.8	[R].SLGFVSNVEALCSSPWK.[Y]	1xCarbamidomethyl [C12]; 1xTMT6plex [K17]; 1xTMT6plex [N-Term]	1	1	1	F6UTM6	F6UTM6 [60-76]		0	2339.25	18.4	16.8	15.3	5.8	6.3	6.6	3	0.89	55.6826
155.9	159.2	155.8	43	40.3	45.8	D3YTR3	RNA-binding protein MEX3D OS=Mus musculus OX=10090 GN=Mex3d PE=1 SV=2	27	17	26	11	718	72.3	5.63	2092	2229.5	2030.5	531	501.9	548
	Abundances (Grouped): F1, 126	Abundances (Grouped): F1, 127	Abundances (Grouped): F1, 128	Abundances (Grouped): F1, 129	Abundances (Grouped): F1, 130	Abundances (Grouped): F1, 131	Annotated Sequence	Modifications	# Protein Groups	# Proteins	# PSMs	Master Protein Accessions	Positions in Master Proteins	Modifications in Master Proteins	# Missed Cleavages	Theo. MH+ [Da]	Abundance: F1: 126, Sample	Abundance: F1: 127, Sample	Abundance: F1: 128, Sample	Abundance: F1: 129, Sample	Abundance: F1: 130, Sample	Abundance: F1: 131, Sample	Charge (by Search Engine): Sequest HT	DeltaM [ppm] (by Search Engine): Sequest HT	RT [min] (by Search Engine): Sequest HT
	107.1	118.5	127.1	81.2	78.5	87.5	[R].RPPAATGGLRGDNALGAASTPEPFYVGSR.[G]	1xTMT6plex [N-Term]	1	2	2	D3YTR3	D3YTR3 [437-465]		1	3114.63	88.3	102	101.8	61.6	60.1	64.3	4	-1.07	52.893
	105.9	100.5	109	79.8	79.2	125.5	[R].AAPLPAFSGCPAVNGAPAQPNTGTR.[R]	1xCarbamidomethyl [C10]; 1xTMT6plex [N-Term]	2	3	1	F6TY75; D3YTR3	F6TY75 [68-92]; D3YTR3 [532-556]		0	2651.36	83.4	82.6	83.3	57.8	57.9	88.1	3	-5.61	54.8095
	181.6	185.5	195.3	15.8	13.5	8.3	[K].AGGLSGATPGPPNLPGQTTIQVR.[V]	1xTMT6plex [N-Term]	1	2	1	D3YTR3	D3YTR3 [312-334]		0	2418.33	63.8	68	66.6	5.1	4.4	2.6	2	-0.94	54.911
	140.3	138.5	148.7	55.2	60.6	56.7	[K].TPVRGEEPVFIVTGR.[K]	1xTMT6plex [N-Term]	1	2	2	D3YTR3	D3YTR3 [270-284]		1	1886.07	92.8	95.6	95.5	33.6	37.2	33.4	3	-0.45	53.012
	153.1	173	148.3	38.5	41.1	46	[R].DKEPVFAVTGMPENVDR.[A]	1xOxidation [M11]; 1xTMT6plex [K2]; 1xTMT6plex [N-Term]	1	2	2	D3YTR3	D3YTR3 [368-384]		1	2378.24	63.5	74.9	59.7	14.7	15.8	17	3	2.68	52.2543
	162.1	170.7	158.8	38	30.2	40.3	[R].DKEPVFAVTGMPENVDR.[A]	1xTMT6plex [K2]; 1xTMT6plex [N-Term]	1	2	1	D3YTR3	D3YTR3 [368-384]		1	2362.25	49.2	54.1	46.8	10.6	8.5	10.9	3	1.61	56.3015
							[R].GDNALGAASTPEPFYVGSR.[G]	1xTMT6plex [N-Term]	1	2	1	D3YTR3	D3YTR3 [447-465]		0	2138.07							2	-0.08	56.8355
	197.8	207.9	191.1	1.8	1.5		[K].SEPECPACR.[T]	2xCarbamidomethyl [C5; C8]; 1xTMT6plex [N-Term]	2	3	4	F6TY75; D3YTR3	F6TY75 [235-243]; D3YTR3 [699-707]		0	1334.6	350.8	384.9	329.1	2.9	2.4		2	-1.16	30.0824
	163.7	162.6	154.4	39.9	39.2	40.3	[R].VVGLVVGPK.[G]	1xTMT6plex [K9]; 1xTMT6plex [N-Term]	3	6	2	Q69Z36; Q05A36; D3YTR3	Q69Z36 [203-211]; Q05A36 [330-338]; D3YTR3 [339-347]		0	1325.89	624.8	647.8	572.3	140	138.9	137	2	2.02	57.1578
	109.4	96.8	125.1	91.7	95.9	81.1	[K].SVNMTECVPVPSSEHVAEIVGR.[Q]	1xCarbamidomethyl [C7]; 1xOxidation [M4]; 1xTMT6plex [N-Term]	2	4	1	Q69Z36; D3YTR3	Q69Z36 [70-91]; D3YTR3 [231-252]		0	2642.31	11.8	10.9	13.1	9.1	9.6	7.8	3	-1.96	53.6308
							[K].SVNMTECVPVPSSEHVAEIVGR.[Q]	1xCarbamidomethyl [C7]; 1xTMT6plex [N-Term]	2	4	1	Q69Z36; D3YTR3	Q69Z36 [70-91]; D3YTR3 [231-252]		0	2626.32							3	3.51	56.7042
	151	157	160.1	48.8	38.3	44.8	[R].GEEPVFIVTGR.[K]	1xTMT6plex [N-Term]	1	2	1	D3YTR3	D3YTR3 [274-284]		0	1432.8	30.6	33.2	31.5	9.1	7.2	8.1	2	-2.15	56.3642
	159.3	159.6	166.4	38.1	35.8	40.8	[R].ICGKSEPECPACR.[T]	3xCarbamidomethyl [C2; C9; C12]; 1xTMT6plex [K4]; 1xTMT6plex [N-Term]	2	3	1	F6TY75; D3YTR3	F6TY75 [231-243]; D3YTR3 [695-707]		1	2022	69.6	72.8	70.6	15.3	14.5	15.9	3	-2.14	39.6831
							[R].THTYIVTPGR.[D]	1xTMT6plex [N-Term]	1	2	1	D3YTR3	D3YTR3 [358-367]		0	1373.77							3	-2.62	38.3093
							[R].AREEIEAHITLR.[T]	1xTMT6plex [N-Term]	1	2	1	D3YTR3	D3YTR3 [385-396]		1	1666.94							4	-1.85	47.3254
	148.6	156.2	154.7	49.9	40.8	49.8	[R].AKTNTYIK.[T]	2xTMT6plex [K2; K8]; 1xTMT6plex [N-Term]	3	6	1	Q69Z36; Q05A36; D3YTR3	Q69Z36 [126-133]; Q05A36 [253-260]; D3YTR3 [262-269]		1	1626.02	311.5	341.7	314.9	96.2	79.4	93	3	-6.19	40.6843
	156	151.1	150.4	51.9	43.2	47.4	[R].KEDVEMAK.[R]	2xTMT6plex [K1; K8]; 1xTMT6plex [N-Term]	1	2	1	D3YTR3	D3YTR3 [285-292]		1	1636.95	177.8	179.8	166.5	54.4	45.7	48.2	3	3.88	43.4165
	147.4	154.7	161.4	44.5	43.5	48.4	[R].KEDVEMAKR.[E]	2xTMT6plex [K1; K8]; 1xTMT6plex [N-Term]	1	2	1	D3YTR3	D3YTR3 [285-293]		2	1793.06	74.1	81.2	78.8	20.6	20.3	21.7	3	5.37	39.6326
							[R].RPPAATGGLR.[G]	1xTMT6plex [N-Term]	1	2	1	D3YTR3	D3YTR3 [437-446]		0	1224.74							3	-5.22	31.6455
155.3	156.8	156.1	45	42.1	44.7	P16563	Cysteine-rich secretory protein 2 OS=Mus musculus OX=10090 GN=Crisp2 PE=1 SV=1	43	16	29	16	243	27.6	6.98	4506.7	4748	4398.6	1201.2	1134.1	1155.9
	Abundances (Grouped): F1, 126	Abundances (Grouped): F1, 127	Abundances (Grouped): F1, 128	Abundances (Grouped): F1, 129	Abundances (Grouped): F1, 130	Abundances (Grouped): F1, 131	Annotated Sequence	Modifications	# Protein Groups	# Proteins	# PSMs	Master Protein Accessions	Positions in Master Proteins	Modifications in Master Proteins	# Missed Cleavages	Theo. MH+ [Da]	Abundance: F1: 126, Sample	Abundance: F1: 127, Sample	Abundance: F1: 128, Sample	Abundance: F1: 129, Sample	Abundance: F1: 130, Sample	Abundance: F1: 131, Sample	Charge (by Search Engine): Sequest HT	DeltaM [ppm] (by Search Engine): Sequest HT	RT [min] (by Search Engine): Sequest HT
	177.1	167.7	169	27.3	29.7	29.2	[R].SVNPTGSDILK.[M]	1xTMT6plex [K11]; 1xTMT6plex [N-Term]	1	4	3	P16563	P16563 [51-61]		0	1588.93	766.5	757.9	710.4	108.5	119.3	112.8	2	0.04	50.9841
	133.9	148.2	140.1	62.4	54.6	60.7	[K].YFYVCHYCPMGNNVMKK.[S]	2xCarbamidomethyl [C5; C8]; 2xTMT6plex [K16; K17]; 1xTMT6plex [N-Term]	1	1	1	P16563	P16563 [163-179]		1	2898.45	388.8	449.3	395.1	166.7	147.1	157.2	4	-7.87	55.7987
	162.9	183.8	168.1	29.9	25.6	29.6	[K].YFYVCHYCPMGNNVMK.[K]	2xCarbamidomethyl [C5; C8]; 1xTMT6plex [K16]; 1xTMT6plex [N-Term]	1	1	1	P16563	P16563 [163-178]		0	2541.2	569.9	670.8	570.9	96.3	83.1	92.4	3	-6.35	57.7239
	156.7	160.9	162.9	42.4	38.6	38.4	[K].IGCGIAYCPNQDNLK.[Y]	2xCarbamidomethyl [C3; C8]; 1xTMT6plex [K15]; 1xTMT6plex [N-Term]	1	3	2	P16563	P16563 [148-162]		0	2181.12	345.2	369.9	348.5	86	79	75.4	2	-3.9	54.9097
	179.3	165.1	174.2	27	26.7	27.7	[K].CQATCLCEDK.[I]	3xCarbamidomethyl [C1; C5; C7]; 1xTMT6plex [K10]; 1xTMT6plex [N-Term]	1	1	2	P16563	P16563 [232-241]		0	1742.83	186.2	179	175.7	25.8	25.7	25.6	2	-0.81	43.244
	159.9	157.5	163.2	42.3	36.1	41	[K].CQATCLCEDKIH.[-]	3xCarbamidomethyl [C1; C5; C7]; 1xTMT6plex [K10]; 1xTMT6plex [N-Term]	1	1	5	P16563	P16563 [232-243]		1	1992.97	243.9	250.7	241.7	59.3	51.1	55.7	3	-3.62	44.4055
	143.9	144.1	149.7	55.6	54.5	52.2	[K].TKCQATCLCEDKIH.[-]	3xCarbamidomethyl [C3; C7; C9]; 2xTMT6plex [K2; K12]; 1xTMT6plex [N-Term]	1	1	1	P16563	P16563 [230-243]		2	2451.28	195	203.9	197	69.3	68.6	63.1	4	-1.84	43.2341
	163.3	161	161.9	42	34	37.8	[K].MEWSIQATTNAQK.[W]	1xOxidation [M1]; 1xTMT6plex [K13]; 1xTMT6plex [N-Term]	1	4	2	P16563	P16563 [62-74]		0	1982.04	262.7	270.3	252.8	62.1	50.7	54.2	2	-1.75	52.6824
	198.5	189.5	182.2	8	12.4	9.5	[R].EIVNKHNELRR.[S]	1xTMT6plex [K5]; 1xTMT6plex [N-Term]	1	4	1	P16563	P16563 [40-50]		2	1866.11	108.3	107.9	96.5	4	6.3	4.6	5	-4.38	34.7463
	148.4	133.3	146.4	56.8	56.5	58.7	[R].RSVNPTGSDILK.[M]	1xTMT6plex [K12]; 1xTMT6plex [N-Term]	1	4	1	P16563	P16563 [50-61]		1	1745.03	175	164.1	167.7	61.6	61.8	61.7	3	3.6	44.8728
	178.6	183.8	188.5	17	17.4	14.7	[K].CILEHSSKDDR.[K]	1xCarbamidomethyl [C1]; 1xTMT6plex [K8]; 1xTMT6plex [N-Term]	1	4	2	P16563	P16563 [79-89]		1	1817.96	137.9	148.1	141.3	12.1	12.5	10.1	4	1.28	37.1357
	174.8	178.9	168	28.3	25.7	24.4	[K].TKCQATCLCEDK.[I]	3xCarbamidomethyl [C3; C7; C9]; 2xTMT6plex [K2; K12]; 1xTMT6plex [N-Term]	1	1	1	P16563	P16563 [230-241]		1	2201.13	110.8	118.4	103.4	16.5	15.1	13.8	3	-6.41	42.1651
	117.4	127.3	130.9	72.5	68.7	83.2	[K].YFYVCHYCPMGNNVMK.[K]	2xCarbamidomethyl [C5; C8]; 1xOxidation [M10]; 1xTMT6plex [K16]; 1xTMT6plex [N-Term]	1	1	1	P16563	P16563 [163-178]		0	2557.19	201.1	227.7	217.7	114.3	109.2	127.1	3	-4.38	55.3806
	150.3	149.8	151.8	50.2	47.6	50.2	[K].TSAGCKHELLK.[T]	1xCarbamidomethyl [C5]; 2xTMT6plex [K6; K11]; 1xTMT6plex [N-Term]	1	1	2	P16563	P16563 [219-229]		1	1931.14	433.7	451.2	425.2	133.3	127.5	129	4	-2.8	40.1287
	122.6	116.5	115.9	83.2	81.1	80.7	[K].MEWSIQATTNAQK.[W]	1xTMT6plex [K13]; 1xTMT6plex [N-Term]	1	4	1	P16563	P16563 [62-74]		0	1966.05	222.9	221.2	204.7	139.1	136.9	130.9	3	-2.63	56.8837
	163.1	148.5	157.2	53.3	36	41.9	[K].CILEHSSKDDRK.[I]	1xCarbamidomethyl [C1]; 2xTMT6plex [K8; K12]; 1xTMT6plex [N-Term]	1	4	1	P16563	P16563 [79-90]		2	2175.22	62.9	59.8	58.9	18.9	12.9	14.4	5	-1.88	37.2509
							[R].EIVNKHNELR.[R]	1xTMT6plex [K5]; 1xTMT6plex [N-Term]	1	4	1	P16563	P16563 [40-49]		1	1710.01							4	-0.47	37.8514
	153.9	150.3	150.5	47.8	47.2	50.2	[K].CILEHSSK.[D]	1xCarbamidomethyl [C1]; 1xTMT6plex [K8]; 1xTMT6plex [N-Term]	1	4	1	P16563	P16563 [79-86]		0	1431.8	95.9	97.8	91.1	27.4	27.3	27.9	3	-1.74	39.6948
155	147.2	160.5	46.5	42.1	48.6	Q6P1G0	HEAT repeat-containing protein 6 OS=Mus musculus OX=10090 GN=Heatr6 PE=1 SV=1	1	1	1	1	1184	128.8	7.24	54.7	54.2	55	15.1	13.8	15.3
	Abundances (Grouped): F1, 126	Abundances (Grouped): F1, 127	Abundances (Grouped): F1, 128	Abundances (Grouped): F1, 129	Abundances (Grouped): F1, 130	Abundances (Grouped): F1, 131	Annotated Sequence	Modifications	# Protein Groups	# Proteins	# PSMs	Master Protein Accessions	Positions in Master Proteins	Modifications in Master Proteins	# Missed Cleavages	Theo. MH+ [Da]	Abundance: F1: 126, Sample	Abundance: F1: 127, Sample	Abundance: F1: 128, Sample	Abundance: F1: 129, Sample	Abundance: F1: 130, Sample	Abundance: F1: 131, Sample	Charge (by Search Engine): Sequest HT	DeltaM [ppm] (by Search Engine): Sequest HT	RT [min] (by Search Engine): Sequest HT
	155	147.2	160.5	46.5	42.1	48.6	[R].SPVKPQQPESTTAR.[S]	1xTMT6plex [K4]; 1xTMT6plex [N-Term]	1	1	1	Q6P1G0	Q6P1G0 [297-310]		0	1984.12	54.7	54.2	55	15.1	13.8	15.3	3	-3.54	35.8147
154	163.1	157.7	42.2	39.9	43.1	Q497P3	Nuclear protein 2 OS=Mus musculus OX=10090 GN=Nupr2 PE=3 SV=1	31	7	12	7	102	11.8	11.02	503.6	556.8	500.7	127	121	125.5
	Abundances (Grouped): F1, 126	Abundances (Grouped): F1, 127	Abundances (Grouped): F1, 128	Abundances (Grouped): F1, 129	Abundances (Grouped): F1, 130	Abundances (Grouped): F1, 131	Annotated Sequence	Modifications	# Protein Groups	# Proteins	# PSMs	Master Protein Accessions	Positions in Master Proteins	Modifications in Master Proteins	# Missed Cleavages	Theo. MH+ [Da]	Abundance: F1: 126, Sample	Abundance: F1: 127, Sample	Abundance: F1: 128, Sample	Abundance: F1: 129, Sample	Abundance: F1: 130, Sample	Abundance: F1: 131, Sample	Charge (by Search Engine): Sequest HT	DeltaM [ppm] (by Search Engine): Sequest HT	RT [min] (by Search Engine): Sequest HT
	157.3	163.7	152.6	44.7	38.2	43.4	[R].KVAQILLNGQR.[K]	1xTMT6plex [K1]; 1xTMT6plex [N-Term]	1	1	2	Q497P3	Q497P3 [76-86]		1	1698.08	122.4	132.9	115.3	32	27.6	30.1	3	-2	53.0134
	173.8	183.8	185.9	21.5	17.9	17.1	[R].TNYPVPGGHERK.[V]	1xTMT6plex [K12]; 1xTMT6plex [N-Term]	1	1	1	Q497P3	Q497P3 [65-76]		1	1813.01	49.1	54.2	51	5.6	4.7	4.3	4	-2.96	36.3559
	162	175.3	170.5	30.6	32	29.6	[R].DFPASGAGR.[S]	1xTMT6plex [N-Term]	1	1	2	Q497P3	Q497P3 [44-52]		0	1106.58	156.5	176.8	159.9	27.2	28.7	25.5	2	-3.04	38.5553
							[R].TNYPVPGGHER.[K]	1xTMT6plex [N-Term]	1	1	4	Q497P3	Q497P3 [65-75]		0	1455.75							3	-8.7	36.1081
							[K].VAQILLNGQR.[K]	1xTMT6plex [N-Term]	1	1	1	Q497P3	Q497P3 [77-86]		0	1340.82							2	-4.03	56.1797
	136.4	143.3	145.4	57	56.2	61.6	[K].VAQILLNGQRK.[R]	1xTMT6plex [K11]; 1xTMT6plex [N-Term]	1	1	1	Q497P3	Q497P3 [77-87]		1	1698.08	100.9	110.6	104.4	38.8	38.6	40.6	3	0.37	53.6581
	148.3	156.5	143.3	50.5	45.8	55.7	[R].KVAQILLNGQRK.[R]	2xTMT6plex [K1; K12]; 1xTMT6plex [N-Term]	1	1	1	Q497P3	Q497P3 [76-87]		2	2055.34	74.7	82.3	70.1	23.4	21.4	25	4	-2.93	51.3067
153.8	147	155.3	42.6	52.3	48.9	Q9Z2K1	Keratin, type I cytoskeletal 16 OS=Mus musculus OX=10090 GN=Krt16 PE=1 SV=3	11	6	7	3	469	51.6	5.2	136.9	136.6	134.2	34.9	43.2	38.8
	Abundances (Grouped): F1, 126	Abundances (Grouped): F1, 127	Abundances (Grouped): F1, 128	Abundances (Grouped): F1, 129	Abundances (Grouped): F1, 130	Abundances (Grouped): F1, 131	Annotated Sequence	Modifications	# Protein Groups	# Proteins	# PSMs	Master Protein Accessions	Positions in Master Proteins	Modifications in Master Proteins	# Missed Cleavages	Theo. MH+ [Da]	Abundance: F1: 126, Sample	Abundance: F1: 127, Sample	Abundance: F1: 128, Sample	Abundance: F1: 129, Sample	Abundance: F1: 130, Sample	Abundance: F1: 131, Sample	Charge (by Search Engine): Sequest HT	DeltaM [ppm] (by Search Engine): Sequest HT	RT [min] (by Search Engine): Sequest HT
	153.8	147	155.3	42.6	52.3	48.9	[K].ASLENSLEETK.[G]	1xTMT6plex [K11]; 1xTMT6plex [N-Term]	1	1	2	Q9Z2K1	Q9Z2K1 [351-361]		0	1678.93	136.9	136.6	134.2	34.9	43.2	38.8	2	1.29	53.2831
	121.3	134.3	143.5	72.2	72.1	56.6	[R].QFTSSSSMK.[G]	1xTMT6plex [K9]; 1xTMT6plex [N-Term]	2	2	1	Q9Z2K1; Q61781	Q9Z2K1 [7-15]; Q61781 [7-15]		0	1460.78	183.9	212.5	211.2	100.7	101.4	76.5	2	-4.12	43.9681
							[K].TRLEQEIATYRR.[L]	1xTMT6plex [N-Term]	3	5	1	Q9Z2K1; Q6IFX2; Q61781	Q9Z2K1 [404-415]; Q6IFX2 [385-396]; Q61781 [412-423]		2	1764.99							4	-1.15	47.748
							[K].NHEEEMLALR.[G]	1xTMT6plex [N-Term]	1	1	1	Q9Z2K1	Q9Z2K1 [250-259]		0	1470.76							3	-0.76	46.0568
							[K].ASLENSLEETKGR.[Y]	1xTMT6plex [K11]; 1xTMT6plex [N-Term]	1	1	1	Q9Z2K1	Q9Z2K1 [351-363]		1	1892.05							3	-0.7	49.9951
	140.2	142.6	143	63.3	50.1	60.7	[KR].DYSPYFK.[T]	1xTMT6plex [K7]; 1xTMT6plex [N-Term]	3	3	1	Q9Z2K1; Q6IFX2; Q61781	Q9Z2K1 [159-165]; Q6IFX2 [140-146]; Q61781 [167-173]		0	1377.75	244.6	259.7	242.2	101.6	81.1	94.4	2	3.23	54.1186
153.4	158	152.3	44.4	47.8	44	Q9JMB1	Testicular haploid expressed gene protein OS=Mus musculus OX=10090 GN=Theg PE=1 SV=1	12	4	4	4	375	42.8	8.98	296.2	318.5	285.5	78.8	85.7	75.8
	Abundances (Grouped): F1, 126	Abundances (Grouped): F1, 127	Abundances (Grouped): F1, 128	Abundances (Grouped): F1, 129	Abundances (Grouped): F1, 130	Abundances (Grouped): F1, 131	Annotated Sequence	Modifications	# Protein Groups	# Proteins	# PSMs	Master Protein Accessions	Positions in Master Proteins	Modifications in Master Proteins	# Missed Cleavages	Theo. MH+ [Da]	Abundance: F1: 126, Sample	Abundance: F1: 127, Sample	Abundance: F1: 128, Sample	Abundance: F1: 129, Sample	Abundance: F1: 130, Sample	Abundance: F1: 131, Sample	Charge (by Search Engine): Sequest HT	DeltaM [ppm] (by Search Engine): Sequest HT	RT [min] (by Search Engine): Sequest HT
	171.3	164	165.1	31.1	37.1	31.3	[K].CVPDRSPQWEVLDVTK.[N]	1xCarbamidomethyl [C1]; 1xTMT6plex [K16]; 1xTMT6plex [N-Term]	1	1	1	Q9JMB1	Q9JMB1 [305-320]		1	2387.28	146.6	146.5	137.2	24.5	29.5	23.9	3	-6.67	58.1735
	148.9	181.4	158.4	35.4	41.1	34.8	[R].STLEYQASNR.[L]	1xTMT6plex [N-Term]	1	1	1	Q9JMB1	Q9JMB1 [214-223]		0	1397.72	39.8	50.6	41.1	8.7	10.2	8.3	2	-9.66	39.3613
	152.1	158.4	143.1	47.3	49.9	49.2	[R].MEELSRPK.[R]	1xTMT6plex [K8]; 1xTMT6plex [N-Term]	1	1	1	Q9JMB1	Q9JMB1 [186-193]		0	1447.83	85.4	92.8	78	24.4	26	24.6	3	-3.17	42.9951
	99.1	111.2	122.1	93.6	87.5	86.5	[K].RFYQEYYNNNR.[T]	1xTMT6plex [N-Term]	1	1	1	Q9JMB1	Q9JMB1 [194-204]		1	1795.87	24.4	28.6	29.2	21.2	20	19	3	-2.34	45.1481
153	146.6	145.9	54.9	51.2	48.5	Q6NXH9	Keratin, type II cytoskeletal 73 OS=Mus musculus OX=10090 GN=Krt73 PE=1 SV=1	5	3	3	1	539	58.9	8.09	218.6	218.6	202.3	72.1	67.8	61.7
	Abundances (Grouped): F1, 126	Abundances (Grouped): F1, 127	Abundances (Grouped): F1, 128	Abundances (Grouped): F1, 129	Abundances (Grouped): F1, 130	Abundances (Grouped): F1, 131	Annotated Sequence	Modifications	# Protein Groups	# Proteins	# PSMs	Master Protein Accessions	Positions in Master Proteins	Modifications in Master Proteins	# Missed Cleavages	Theo. MH+ [Da]	Abundance: F1: 126, Sample	Abundance: F1: 127, Sample	Abundance: F1: 128, Sample	Abundance: F1: 129, Sample	Abundance: F1: 130, Sample	Abundance: F1: 131, Sample	Charge (by Search Engine): Sequest HT	DeltaM [ppm] (by Search Engine): Sequest HT	RT [min] (by Search Engine): Sequest HT
							[R].FLEQQNQVLQTK.[W]	1xTMT6plex [K12]; 1xTMT6plex [N-Term]	2	5	1	Q6NXH9; P04104	Q6NXH9 [151-162]; P04104 [208-219]		0	1934.11							2	-5.02	56.092
							[K].LLEGEECR.[MLI]	1xCarbamidomethyl [C7]; 1xTMT6plex [N-Term]	5	11	1	Q3TTY5; Q6NXH9; P50446; Q3UV17; Q922U2	Q3TTY5 [504-511]; Q6NXH9 [436-443]; P50446 [457-464]; Q3UV17 [472-479]; Q922U2 [467-474]		0	1234.63							2	-0.08	45.1569
	153	146.6	145.9	54.9	51.2	48.5	[K].DVDAAYMSK.[V]	1xTMT6plex [K9]; 1xTMT6plex [N-Term]	1	1	1	Q6NXH9	Q6NXH9 [241-249]		0	1457.77	218.6	218.6	202.3	72.1	67.8	61.7	2	0.38	48.7621
152.1	160.1	151	45.3	45.9	45.6	O09035	Diazepam-binding inhibitor-like 5 OS=Mus musculus OX=10090 GN=Dbil5 PE=1 SV=1	41	4	25	4	87	9.9	8.57	4887.1	5368.4	4708.3	1338.1	1367.6	1305.1
	Abundances (Grouped): F1, 126	Abundances (Grouped): F1, 127	Abundances (Grouped): F1, 128	Abundances (Grouped): F1, 129	Abundances (Grouped): F1, 130	Abundances (Grouped): F1, 131	Annotated Sequence	Modifications	# Protein Groups	# Proteins	# PSMs	Master Protein Accessions	Positions in Master Proteins	Modifications in Master Proteins	# Missed Cleavages	Theo. MH+ [Da]	Abundance: F1: 126, Sample	Abundance: F1: 127, Sample	Abundance: F1: 128, Sample	Abundance: F1: 129, Sample	Abundance: F1: 130, Sample	Abundance: F1: 131, Sample	Charge (by Search Engine): Sequest HT	DeltaM [ppm] (by Search Engine): Sequest HT	RT [min] (by Search Engine): Sequest HT
	147.7	158	153.9	43.5	48.4	48.5	[K].QATQGDCNIPVPPATDVR.[A]	1xCarbamidomethyl [C7]; 1xTMT6plex [N-Term]	1	1	16	O09035	O09035 [34-51]		0	2168.1	279.7	312.3	282.9	75.8	85	81.8	3	0.84	50.4719
	169.8	168.1	163.5	33.5	33.2	32	[K].AKYEAWMVNK.[G]	2xTMT6plex [K2; K10]; 1xTMT6plex [N-Term]	1	1	1	O09035	O09035 [54-63]		1	1927.11	593.4	613.2	554.8	107.6	107.6	99.7	3	-4.71	54.7075
	158	178.5	159.6	33.6	34.6	35.8	[K].LLVYSFYK.[Q]	1xTMT6plex [K8]; 1xTMT6plex [N-Term]	1	1	2	O09035	O09035 [26-33]		0	1490.9	1645.7	1941.2	1614.2	321.5	334.9	332	2	3	58.92
	142.9	142	138.2	59	58.9	59	[K].YEAWMVNK.[G]	1xTMT6plex [K8]; 1xTMT6plex [N-Term]	1	1	3	O09035	O09035 [56-63]		0	1498.81	1146.1	1188.8	1075.9	435.1	438.3	421.4	2	-1.93	57.4363
	142.2	147	143.4	57.2	57	53.3	[K].YEAWMVNK.[G]	1xOxidation [M5]; 1xTMT6plex [K8]; 1xTMT6plex [N-Term]	1	1	2	O09035	O09035 [56-63]		0	1514.81	731.2	788.9	716.3	270.6	271.9	244.3	2	0.19	53.2765
	155.8	159.3	151.7	44	44.4	44.8	[K].AKYEAWMVNK.[G]	1xOxidation [M7]; 2xTMT6plex [K2; K10]; 1xTMT6plex [N-Term]	1	1	1	O09035	O09035 [54-63]		1	1943.1	491	524	464.2	127.5	129.9	125.9	3	-4.48	50.1791
152.1	151.3	149.2	48.4	48.6	50.3	Q9D823	60S ribosomal protein L37 OS=Mus musculus OX=10090 GN=Rpl37 PE=1 SV=3	37	5	5	5	97	11.1	11.74	1108.1	1150.4	1055.7	324.6	328.6	326.9
	Abundances (Grouped): F1, 126	Abundances (Grouped): F1, 127	Abundances (Grouped): F1, 128	Abundances (Grouped): F1, 129	Abundances (Grouped): F1, 130	Abundances (Grouped): F1, 131	Annotated Sequence	Modifications	# Protein Groups	# Proteins	# PSMs	Master Protein Accessions	Positions in Master Proteins	Modifications in Master Proteins	# Missed Cleavages	Theo. MH+ [Da]	Abundance: F1: 126, Sample	Abundance: F1: 127, Sample	Abundance: F1: 128, Sample	Abundance: F1: 129, Sample	Abundance: F1: 130, Sample	Abundance: F1: 131, Sample	Charge (by Search Engine): Sequest HT	DeltaM [ppm] (by Search Engine): Sequest HT	RT [min] (by Search Engine): Sequest HT
	159.2	164.1	153	44.4	38.3	41	[-].MTKGTSSFGK.[R]	2xTMT6plex [K3; K10]; 1xTMT6plex [N-Term]; 1xMet-loss [N-Term]	1	1	1	Q9D823	Q9D823 [1-10]	Q9D823 1xMet-loss [N-Term]	1	1599.97	462.1	497.2	431.3	118.5	103.3	106.2	3	-0.5	39.7215
	146.3	131	141	63.3	65.9	52.5	[R].HGFREGTTPKPK.[R]	2xTMT6plex [K10; K12]; 1xTMT6plex [N-Term]	1	1	1	Q9D823	Q9D823 [76-87]		1	2042.21	98.5	92.1	92.2	39.2	41.2	31.5	5	-6.08	33.9181
	137.6	134.8	139.1	56.9	61.6	69.9	[R].KYNWSAK.[A]	2xTMT6plex [K1; K7]; 1xTMT6plex [N-Term]	1	1	1	Q9D823	Q9D823 [46-52]		1	1583.95	352.6	360.6	346.1	134.1	146.5	159.7	3	-5.08	45.8056
	170	167.5	167.2	31.1	35.3	28.9	[K].CGYPAKR.[K]	1xCarbamidomethyl [C1]; 1xTMT6plex [K6]; 1xTMT6plex [N-Term]	1	1	1	Q9D823	Q9D823 [37-43]		1	1309.75	194.9	200.5	186.1	32.8	37.6	29.5	3	-3.97	32.5665
							[K].GTSSFGK.[R]	1xTMT6plex [K7]; 1xTMT6plex [N-Term]	1	1	1	Q9D823	Q9D823 [4-10]		0	1141.66							2	-1.73	40.5962
151.8	147.8	157.8	44.8	53.7	44.1	Q9DA47	Transmembrane protein 239 OS=Mus musculus OX=10090 GN=Tmem239 PE=2 SV=1	9	1	3	1	151	17.2	7.39	54.5	55.4	55	14.8	17.9	14.1
	Abundances (Grouped): F1, 126	Abundances (Grouped): F1, 127	Abundances (Grouped): F1, 128	Abundances (Grouped): F1, 129	Abundances (Grouped): F1, 130	Abundances (Grouped): F1, 131	Annotated Sequence	Modifications	# Protein Groups	# Proteins	# PSMs	Master Protein Accessions	Positions in Master Proteins	Modifications in Master Proteins	# Missed Cleavages	Theo. MH+ [Da]	Abundance: F1: 126, Sample	Abundance: F1: 127, Sample	Abundance: F1: 128, Sample	Abundance: F1: 129, Sample	Abundance: F1: 130, Sample	Abundance: F1: 131, Sample	Charge (by Search Engine): Sequest HT	DeltaM [ppm] (by Search Engine): Sequest HT	RT [min] (by Search Engine): Sequest HT
	151.8	147.8	157.8	44.8	53.7	44.1	[R].VESDIIGAGEGPQR.[A]	1xTMT6plex [N-Term]	1	1	3	Q9DA47	Q9DA47 [6-19]		0	1656.88	54.5	55.4	55	14.8	17.9	14.1	2	1.61	50.7984
150.2	148.4	147	53.4	51.4	49.6	A2AVR2	Maestro heat-like repeat-containing protein family member 7 OS=Mus musculus OX=10090 GN=Mroh7 PE=3 SV=1	9	10	10	10	1279	141.6	7.33	826.9	852.6	785.7	270.4	262.8	243.5
	Abundances (Grouped): F1, 126	Abundances (Grouped): F1, 127	Abundances (Grouped): F1, 128	Abundances (Grouped): F1, 129	Abundances (Grouped): F1, 130	Abundances (Grouped): F1, 131	Annotated Sequence	Modifications	# Protein Groups	# Proteins	# PSMs	Master Protein Accessions	Positions in Master Proteins	Modifications in Master Proteins	# Missed Cleavages	Theo. MH+ [Da]	Abundance: F1: 126, Sample	Abundance: F1: 127, Sample	Abundance: F1: 128, Sample	Abundance: F1: 129, Sample	Abundance: F1: 130, Sample	Abundance: F1: 131, Sample	Charge (by Search Engine): Sequest HT	DeltaM [ppm] (by Search Engine): Sequest HT	RT [min] (by Search Engine): Sequest HT
	143.2	151	132.4	60.2	58.2	55.1	[R].DLLDLLLTSLK.[E]	1xTMT6plex [K11]; 1xTMT6plex [N-Term]	1	1	1	A2AVR2	A2AVR2 [769-779]		0	1702.08	207.7	228.6	186.5	80.3	78.3	71.3	2	-0.15	60.0458
	149.2	155.3	148.1	49.7	51.6	46.2	[R].QIQEEPLDSLLSPARR.[Q]	1xTMT6plex [N-Term]	1	2	1	A2AVR2	A2AVR2 [420-435]		1	2081.16	77.6	84.3	74.8	23.8	24.9	21.4	3	-0.42	58.2776
	180.9	152	167.6	36.5	32.8	30.2	[K].NQEMVEMKEEK.[E]	2xTMT6plex [K8; K11]; 1xTMT6plex [N-Term]	1	2	1	A2AVR2	A2AVR2 [400-410]		1	2082.12	103.4	90.7	93	19.2	17.4	15.4	3	-3.64	48.3954
	163.9	167.3	144	48.2	35.5	41.2	[K].GSINGTSTIQPR.[S]	1xTMT6plex [N-Term]	1	1	1	A2AVR2	A2AVR2 [252-263]		0	1459.81	25.9	27.6	22.1	7	5.2	5.8	2	1.04	39.6813
	159.8	155.7	160.9	43.3	40.1	40.3	[R].ASCINVYGK.[V]	1xCarbamidomethyl [C3]; 1xTMT6plex [K9]; 1xTMT6plex [N-Term]	1	1	1	A2AVR2	A2AVR2 [1057-1065]		0	1469.82	303.9	309.2	297.1	75.8	70.7	68.3	2	-2.44	48.7454
	134.3	139.5	117.2	47.6	86.1	75.3	[R].RIPEEYSLGR.[M]	1xTMT6plex [N-Term]	1	1	1	A2AVR2	A2AVR2 [952-961]		1	1448.81	19	20.6	16.1	6.2	11.3	9.5	3	-1	46.2769
	112.4	115.1	127.2	82.6	79.6	83.1	[R].ERVELVNTCVR.[S]	1xCarbamidomethyl [C9]; 1xTMT6plex [N-Term]	1	2	1	A2AVR2	A2AVR2 [455-465]		1	1603.88	69.8	74.6	76.7	47.2	45.9	46	3	-5.73	43.4285
	139.9	116.3	142.7	84.6	70	46.5	[R].DYSEDNSIR.[T]	1xTMT6plex [N-Term]	1	1	1	A2AVR2	A2AVR2 [335-343]		0	1327.63	19.6	17	19.4	10.9	9.1	5.8	2	-8.26	37.8543
							[K].ELYENNK.[R]	1xTMT6plex [K7]; 1xTMT6plex [N-Term]	1	1	1	A2AVR2	A2AVR2 [612-618]		0	1367.76							2	-5.79	43.2036
							[R].IPSSTQANVLSPENSSRPCSEDVSK.[S]	1xCarbamidomethyl [C19]; 1xTMT6plex [K25]; 1xTMT6plex [N-Term]	1	1	1	A2AVR2	A2AVR2 [123-147]		0	3147.6							3	0.05	50.8468
150.2	159.7	125.7	45.6	63.5	55.4	Q9DAL7	IQ domain-containing protein F5 OS=Mus musculus OX=10090 GN=Iqcf5 PE=2 SV=1	8	1	1	1	148	17.8	10.61	28.3	31.4	23	7.9	11.1	9.3
	Abundances (Grouped): F1, 126	Abundances (Grouped): F1, 127	Abundances (Grouped): F1, 128	Abundances (Grouped): F1, 129	Abundances (Grouped): F1, 130	Abundances (Grouped): F1, 131	Annotated Sequence	Modifications	# Protein Groups	# Proteins	# PSMs	Master Protein Accessions	Positions in Master Proteins	Modifications in Master Proteins	# Missed Cleavages	Theo. MH+ [Da]	Abundance: F1: 126, Sample	Abundance: F1: 127, Sample	Abundance: F1: 128, Sample	Abundance: F1: 129, Sample	Abundance: F1: 130, Sample	Abundance: F1: 131, Sample	Charge (by Search Engine): Sequest HT	DeltaM [ppm] (by Search Engine): Sequest HT	RT [min] (by Search Engine): Sequest HT
	150.2	159.7	125.7	45.6	63.5	55.4	[K].STAMTETSAAVR.[I]	1xTMT6plex [N-Term]	1	1	1	Q9DAL7	Q9DAL7 [6-17]		0	1453.75	28.3	31.4	23	7.9	11.1	9.3	2	-1.13	39.6178
149.6	145.6	149.1	59.6	51.9	44.2	F7BE40	ADP-ribosylation factor-like 9 (Fragment) OS=Mus musculus OX=10090 GN=Arl9 PE=3 SV=1	13	2	3	2	171	19	6.13	68	69.1	65.8	24.9	21.9	17.9
	Abundances (Grouped): F1, 126	Abundances (Grouped): F1, 127	Abundances (Grouped): F1, 128	Abundances (Grouped): F1, 129	Abundances (Grouped): F1, 130	Abundances (Grouped): F1, 131	Annotated Sequence	Modifications	# Protein Groups	# Proteins	# PSMs	Master Protein Accessions	Positions in Master Proteins	Modifications in Master Proteins	# Missed Cleavages	Theo. MH+ [Da]	Abundance: F1: 126, Sample	Abundance: F1: 127, Sample	Abundance: F1: 128, Sample	Abundance: F1: 129, Sample	Abundance: F1: 130, Sample	Abundance: F1: 131, Sample	Charge (by Search Engine): Sequest HT	DeltaM [ppm] (by Search Engine): Sequest HT	RT [min] (by Search Engine): Sequest HT
	139	137.4	135.5	63.4	68.2	56.4	[K].NGSEIPSTMQDAK.[D]	1xTMT6plex [K13]; 1xTMT6plex [N-Term]	1	1	2	F7BE40	F7BE40 [149-161]		0	1835.96	22.4	23.1	21.2	9.4	10.2	8.1	3	-3.51	47.7623
	155.4	150.2	156.5	57.4	43	37.5	[K].DLITHLATDM.[-]	1xTMT6plex [N-Term]	1	1	1	F7BE40	F7BE40 [162-171]		0	1358.72	45.6	46	44.6	15.5	11.7	9.8	2	0.81	58.6741
149.5	150.5	147.6	50.3	53.1	49	Q9ERN0	Secretory carrier-associated membrane protein 2 OS=Mus musculus OX=10090 GN=Scamp2 PE=1 SV=1	18	7	10	4	329	36.4	6.32	740	777.6	709.5	229.1	243.8	216.1
	Abundances (Grouped): F1, 126	Abundances (Grouped): F1, 127	Abundances (Grouped): F1, 128	Abundances (Grouped): F1, 129	Abundances (Grouped): F1, 130	Abundances (Grouped): F1, 131	Annotated Sequence	Modifications	# Protein Groups	# Proteins	# PSMs	Master Protein Accessions	Positions in Master Proteins	Modifications in Master Proteins	# Missed Cleavages	Theo. MH+ [Da]	Abundance: F1: 126, Sample	Abundance: F1: 127, Sample	Abundance: F1: 128, Sample	Abundance: F1: 129, Sample	Abundance: F1: 130, Sample	Abundance: F1: 131, Sample	Charge (by Search Engine): Sequest HT	DeltaM [ppm] (by Search Engine): Sequest HT	RT [min] (by Search Engine): Sequest HT
	105.8	116	101.9	87.5	104	84.8	[R].RTGASFQQAQEEFSQGIFSSR.[T]	1xTMT6plex [N-Term]	1	1	1	Q9ERN0	Q9ERN0 [292-312]		1	2590.28	52.2	59.7	48.8	39.7	47.6	37.3	3	0.35	58.2957
	173.8	173.1	173.5	27.2	27.9	24.5	[R].TGASFQQAQEEFSQGIFSSR.[T]	1xTMT6plex [N-Term]	1	1	1	Q9ERN0	Q9ERN0 [293-312]		0	2434.18	550.7	572.6	534	79.2	82	69.2	3	-1.21	58.6466
	98.5	80.5	87	106	118.6	109.4	[R].ELQNTAANLHVR.[D]	1xTMT6plex [N-Term]	2	2	1	Q9ERN0; A0A1L1SUU4	Q9ERN0 [105-116]; A0A1L1SUU4 [148-159]		0	1594.89	19.7	16.8	16.9	19.5	22	19.5	3	-1.54	44.4316
	93.6	94.7	79.9	113.5	105.2	113.3	[K].ERELQNTAANLHVR.[D]	1xTMT6plex [N-Term]	2	2	4	Q9ERN0; A0A1L1SUU4	Q9ERN0 [103-116]; A0A1L1SUU4 [146-159]		1	1880.03	30.4	32.1	25.2	33.9	31.7	32.8	3	-3.17	44.4941
	114.1	124.3	120.2	81	80	80.4	[R].QQEELDRK.[A]	1xTMT6plex [K8]; 1xTMT6plex [N-Term]	2	2	1	Q9ERN0; A0A1L1SUU4	Q9ERN0 [88-95]; A0A1L1SUU4 [131-138]		1	1503.85	39.5	44.9	40.4	25.8	25.7	24.8	3	-0.29	34.7451
	107.7	132.5	123.1	71.8	86	78.8	[R].TFRGAASSAAR.[G]	1xTMT6plex [N-Term]	1	1	1	Q9ERN0	Q9ERN0 [313-323]		1	1323.73	28.2	36.2	31.3	17.3	20.9	18.4	3	-3.55	31.0967
	124.6	94.6	85.8	96.2	96.7	102.1	[R].GAFQGN.[-]	1xTMT6plex [N-Term]	1	1	1	Q9ERN0	Q9ERN0 [324-329]		0	822.431	19.3	15.3	12.9	13.7	13.9	14.1	2	-9	36.227
148.9	158.8	161.8	47.6	39.8	43.1	A0A571BDB6	Transglutaminase 7 OS=Mus musculus OX=10090 GN=Tgm7 PE=3 SV=1	1	1	1	1	707	79.5	6.19	124.1	138.2	131	36.5	30.8	32
	Abundances (Grouped): F1, 126	Abundances (Grouped): F1, 127	Abundances (Grouped): F1, 128	Abundances (Grouped): F1, 129	Abundances (Grouped): F1, 130	Abundances (Grouped): F1, 131	Annotated Sequence	Modifications	# Protein Groups	# Proteins	# PSMs	Master Protein Accessions	Positions in Master Proteins	Modifications in Master Proteins	# Missed Cleavages	Theo. MH+ [Da]	Abundance: F1: 126, Sample	Abundance: F1: 127, Sample	Abundance: F1: 128, Sample	Abundance: F1: 129, Sample	Abundance: F1: 130, Sample	Abundance: F1: 131, Sample	Charge (by Search Engine): Sequest HT	DeltaM [ppm] (by Search Engine): Sequest HT	RT [min] (by Search Engine): Sequest HT
	148.9	158.8	161.8	47.6	39.8	43.1	[R].DKLTDERLIR.[V]	1xTMT6plex [K2]; 1xTMT6plex [N-Term]	1	2	1	A0A571BDB6	A0A571BDB6 [571-580]		2	1717.04	124.1	138.2	131	36.5	30.8	32	3	-3.57	46.3762
148	154.6	136.7	56.6	48.4	55.6	Q5F289	Spermatid maturation protein 1 OS=Mus musculus OX=10090 GN=Spem1 PE=1 SV=1	2	1	1	1	310	35	9.04	70.8	77.2	63.5	24.9	21.5	23.7
	Abundances (Grouped): F1, 126	Abundances (Grouped): F1, 127	Abundances (Grouped): F1, 128	Abundances (Grouped): F1, 129	Abundances (Grouped): F1, 130	Abundances (Grouped): F1, 131	Annotated Sequence	Modifications	# Protein Groups	# Proteins	# PSMs	Master Protein Accessions	Positions in Master Proteins	Modifications in Master Proteins	# Missed Cleavages	Theo. MH+ [Da]	Abundance: F1: 126, Sample	Abundance: F1: 127, Sample	Abundance: F1: 128, Sample	Abundance: F1: 129, Sample	Abundance: F1: 130, Sample	Abundance: F1: 131, Sample	Charge (by Search Engine): Sequest HT	DeltaM [ppm] (by Search Engine): Sequest HT	RT [min] (by Search Engine): Sequest HT
	148	154.6	136.7	56.6	48.4	55.6	[R].CTMDPVK.[M]	1xCarbamidomethyl [C1]; 1xTMT6plex [K7]; 1xTMT6plex [N-Term]	1	1	1	Q5F289	Q5F289 [92-98]		0	1308.71	70.8	77.2	63.5	24.9	21.5	23.7	2	-0.94	44.0882
147.6	155.8	150.8	48.5	48.9	48.4	Q14AA6	GTP-binding nuclear protein Ran OS=Mus musculus OX=10090 GN=1700009N14Rik PE=1 SV=1	46	11	23	1	216	24.3	7.97	753.4	830.2	747.6	227.5	231.7	220
	Abundances (Grouped): F1, 126	Abundances (Grouped): F1, 127	Abundances (Grouped): F1, 128	Abundances (Grouped): F1, 129	Abundances (Grouped): F1, 130	Abundances (Grouped): F1, 131	Annotated Sequence	Modifications	# Protein Groups	# Proteins	# PSMs	Master Protein Accessions	Positions in Master Proteins	Modifications in Master Proteins	# Missed Cleavages	Theo. MH+ [Da]	Abundance: F1: 126, Sample	Abundance: F1: 127, Sample	Abundance: F1: 128, Sample	Abundance: F1: 129, Sample	Abundance: F1: 130, Sample	Abundance: F1: 131, Sample	Charge (by Search Engine): Sequest HT	DeltaM [ppm] (by Search Engine): Sequest HT	RT [min] (by Search Engine): Sequest HT
	122.8	110.4	98.9	79.1	104.2	84.6	[R].LTGDSNLEFVAMPALAPPEVVMDPALAK.[K]	1xTMT6plex [K28]; 1xTMT6plex [N-Term]	1	1	1	Q14AA6	Q14AA6 [168-195]		0	3354.81	17.9	16.8	14	10.6	14.1	11	3	4.39	59.2211
	75.5	79	75.4	117.3	137	115.8	[K].RHLTGEFEK.[EK]	1xTMT6plex [K9]; 1xTMT6plex [N-Term]	3	3	2	Q61820; Q14AA6; P62827	Q61820 [29-37]; Q14AA6 [29-37]; P62827 [29-37]		1	1574.91	138.1	150.8	134	197.4	232.5	188.9	3	-1.91	39.6062
	121.3	122.1	118.6	79.3	81.1	77.6	[R].GPIKFNVWDTAGQEK.[F]	2xTMT6plex [K4; K15]; 1xTMT6plex [N-Term]	3	3	1	Q61820; Q14AA6; P62827	Q61820 [57-71]; Q14AA6 [57-71]; P62827 [57-71]		1	2377.35	1329.2	1397.1	1262.5	799.7	824.7	758.6	3	-5.39	58.1239
	148.3	157.2	152.4	47.6	47.3	47.3	[R].VCENIPIVLCGNKVDVK.[D]	2xCarbamidomethyl [C2; C10]; 2xTMT6plex [K13; K17]; 1xTMT6plex [N-Term]	2	2	1	Q61820; Q14AA6	Q61820 [111-127]; Q14AA6 [111-127]		1	2644.51	735.5	813.4	733.6	216.9	217.6	209	3	-5.69	58.2742
	93.1	91	91.3	111	105.8	107.8	[K].KNLQYYDISAK.[S]	2xTMT6plex [K1; K11]; 1xTMT6plex [N-Term]	2	2	1	Q14AA6; P62827	Q14AA6 [142-152]; P62827 [142-152]		1	2030.19	219.5	224	209	240.7	231.4	226.5	3	-6.47	51.3255
	103.3	108.8	104.6	90.6	98	94.7	[R].HLTGEFEKK.[Y]	2xTMT6plex [K8; K9]; 1xTMT6plex [N-Term]	2	2	2	Q14AA6; P62827	Q14AA6 [30-38]; P62827 [30-38]		1	1776.06	231.6	254.5	227.8	186.9	203.9	189.2	3	-2.7	43.3075
	96.4	96.2	93.3	104.6	107.6	102	[K].NLQYYDISAK.[S]	1xTMT6plex [K10]; 1xTMT6plex [N-Term]	2	2	4	Q14AA6; P62827	Q14AA6 [143-152]; P62827 [143-152]		0	1672.93	1480.3	1542.3	1391.1	1477.9	1533.4	1397.4	2	0.17	54.957
	74.1	82.6	72.9	110.8	134.9	124.6	[R].HLTGEFEK.[EK]	1xTMT6plex [K8]; 1xTMT6plex [N-Term]	3	3	2	Q61820; Q14AA6; P62827	Q61820 [30-37]; Q14AA6 [30-37]; P62827 [30-37]		0	1418.8	95.6	111.3	91.4	131.5	161.6	143.4	3	1.07	45.4265
	84.8	99.3	102.2	96.3	90.7	126.8	[K].LVLVGDGGTGK.[T]	1xTMT6plex [K11]; 1xTMT6plex [N-Term]	2	2	3	Q14AA6; P62827	Q14AA6 [13-23]; P62827 [13-23]		0	1473.9	13.5	16.5	15.8	14.1	13.4	18	2	3.11	54.1678
	97.1	96.8	80.7	100.7	122.8	102	[K].RHLTGEFEKK.[Y]	2xTMT6plex [K9; K10]; 1xTMT6plex [N-Term]	2	2	1	Q14AA6; P62827	Q14AA6 [29-38]; P62827 [29-38]		2	1932.16	60	62.4	48.4	57.2	70.4	56.2	5	-5.53	38.695
	99	98.2	97.3	97.5	100.2	107.9	[K].NVPNWHR.[D]	1xTMT6plex [N-Term]	2	2	5	Q14AA6; P62827	Q14AA6 [100-106]; P62827 [100-106]		0	1151.63	109.3	113.2	104.3	99	102.7	106.2	3	-3.44	39.4743
147.3	114.6	134.6	56	83.6	64	Q8BXV2	BRI3-binding protein OS=Mus musculus OX=10090 GN=Bri3bp PE=1 SV=1	3	1	1	1	253	28.2	9.52	18.6	15.1	16.5	6.5	9.8	7.2
	Abundances (Grouped): F1, 126	Abundances (Grouped): F1, 127	Abundances (Grouped): F1, 128	Abundances (Grouped): F1, 129	Abundances (Grouped): F1, 130	Abundances (Grouped): F1, 131	Annotated Sequence	Modifications	# Protein Groups	# Proteins	# PSMs	Master Protein Accessions	Positions in Master Proteins	Modifications in Master Proteins	# Missed Cleavages	Theo. MH+ [Da]	Abundance: F1: 126, Sample	Abundance: F1: 127, Sample	Abundance: F1: 128, Sample	Abundance: F1: 129, Sample	Abundance: F1: 130, Sample	Abundance: F1: 131, Sample	Charge (by Search Engine): Sequest HT	DeltaM [ppm] (by Search Engine): Sequest HT	RT [min] (by Search Engine): Sequest HT
	147.3	114.6	134.6	56	83.6	64	[R].VLENLDR.[S]	1xTMT6plex [N-Term]	1	1	1	Q8BXV2	Q8BXV2 [243-249]		0	1087.63	18.6	15.1	16.5	6.5	9.8	7.2	2	-4.17	50.1692
147.2	133.1	127.2	51	72.7	68.7	Q80VQ1	Leucine-rich repeat-containing protein 1 OS=Mus musculus OX=10090 GN=Lrrc1 PE=1 SV=2	11	5	5	5	524	59.4	5.16	56.5	53.3	47.4	18	25.9	23.5
	Abundances (Grouped): F1, 126	Abundances (Grouped): F1, 127	Abundances (Grouped): F1, 128	Abundances (Grouped): F1, 129	Abundances (Grouped): F1, 130	Abundances (Grouped): F1, 131	Annotated Sequence	Modifications	# Protein Groups	# Proteins	# PSMs	Master Protein Accessions	Positions in Master Proteins	Modifications in Master Proteins	# Missed Cleavages	Theo. MH+ [Da]	Abundance: F1: 126, Sample	Abundance: F1: 127, Sample	Abundance: F1: 128, Sample	Abundance: F1: 129, Sample	Abundance: F1: 130, Sample	Abundance: F1: 131, Sample	Charge (by Search Engine): Sequest HT	DeltaM [ppm] (by Search Engine): Sequest HT	RT [min] (by Search Engine): Sequest HT
	119	88.1	111.5	86.3	103	92.1	[R].HCSLVYVPEEIYR.[Y]	1xCarbamidomethyl [C2]; 1xTMT6plex [N-Term]	1	1	1	Q80VQ1	Q80VQ1 [21-33]		0	1893.97	13.2	10.2	12	8.8	10.6	9.1	3	1.66	56.0877
							[K].GLDSNKNEVNHAAER.[V]	1xTMT6plex [K6]; 1xTMT6plex [N-Term]	1	2	1	Q80VQ1	Q80VQ1 [505-519]		1	2112.12							4	-1.93	36.0924
	153.3	156.6	126.7	39.8	73	50.6	[R].FLEDEKDEDENETR.[T]	1xTMT6plex [K6]; 1xTMT6plex [N-Term]	1	2	1	Q80VQ1	Q80VQ1 [460-473]		1	2227.08	19.7	21	15.8	4.7	8.7	5.8	3	0.57	49.8128
	163.5	146.7	139.8	33.9	49.3	66.8	[R].RATPHPGELK.[N]	1xTMT6plex [K10]; 1xTMT6plex [N-Term]	1	2	1	Q80VQ1	Q80VQ1 [478-487]		1	1563.94	23.6	22.1	19.6	4.5	6.6	8.6	4	-4.46	33.4247
							[R].HVEAIDK.[R]	1xTMT6plex [K7]; 1xTMT6plex [N-Term]	1	1	1	Q80VQ1	Q80VQ1 [13-19]		0	1269.76							3	-3.5	38.7333
147.2	142	151	51.7	49.8	58.2	P07978	Protamine-2 OS=Mus musculus OX=10090 GN=Prm2 PE=1 SV=1	33	6	10	6	107	13.6	12.04	218.6	220.2	217.8	70.6	68.7	77.1
	Abundances (Grouped): F1, 126	Abundances (Grouped): F1, 127	Abundances (Grouped): F1, 128	Abundances (Grouped): F1, 129	Abundances (Grouped): F1, 130	Abundances (Grouped): F1, 131	Annotated Sequence	Modifications	# Protein Groups	# Proteins	# PSMs	Master Protein Accessions	Positions in Master Proteins	Modifications in Master Proteins	# Missed Cleavages	Theo. MH+ [Da]	Abundance: F1: 126, Sample	Abundance: F1: 127, Sample	Abundance: F1: 128, Sample	Abundance: F1: 129, Sample	Abundance: F1: 130, Sample	Abundance: F1: 131, Sample	Charge (by Search Engine): Sequest HT	DeltaM [ppm] (by Search Engine): Sequest HT	RT [min] (by Search Engine): Sequest HT
	187.8	185.7	185.4	23.4	17.6		[R].EEQGQGQGLSPER.[V]	1xTMT6plex [N-Term]	1	1	1	P07978	P07978 [24-36]		0	1643.82	21.8	22.5	20.9	2.5	1.9		2	-1.83	34.2939
	140.2	146.2	144	54.6	50	64.9	[R].EEQGQGQGLSPERVEDYGR.[T]	1xTMT6plex [N-Term]	1	1	1	P07978	P07978 [24-42]		1	2363.14	75.9	82.6	75.7	27.2	25.1	31.3	3	1.03	45.9558
	100.4	91.8	107.6	97.1	91.9	111.2	[R].SPSEGPHQGPGQDHEREEQGQGQGLSPERVEDYGR.[T]	1xTMT6plex [N-Term]	1	1	2	P07978	P07978 [8-42]		2	4058.88	24.6	23.5	25.6	21.9	20.9	24.3	6	-0.52	40.6015
							[R].SPSEGPHQGPGQDHEREEQGQGQGLSPER.[V]	1xTMT6plex [N-Term]	1	1	4	P07978	P07978 [8-36]		1	3339.55							4	-1.88	31.8865
	165.2	150.6	168.9	35.4	38.5	41.4	[R].VEDYGR.[T]	1xTMT6plex [N-Term]	1	1	1	P07978	P07978 [37-42]		0	967.505	96.3	91.6	95.6	19	20.8	21.5	2	0.63	36.4741
							[R].SPSEGPHQGPGQDHER.[E]	1xTMT6plex [N-Term]	1	1	1	P07978	P07978 [8-23]		0	1943.92							4	-5.3	23.2791
147.1	145.6	152.4	52.9	49.3	52.7	Q6IFX2	Keratin, type I cytoskeletal 42 OS=Mus musculus OX=10090 GN=Krt42 PE=1 SV=1	13	7	7	4	452	50.1	5.16	682.2	704.9	686.3	225.9	212.3	218
	Abundances (Grouped): F1, 126	Abundances (Grouped): F1, 127	Abundances (Grouped): F1, 128	Abundances (Grouped): F1, 129	Abundances (Grouped): F1, 130	Abundances (Grouped): F1, 131	Annotated Sequence	Modifications	# Protein Groups	# Proteins	# PSMs	Master Protein Accessions	Positions in Master Proteins	Modifications in Master Proteins	# Missed Cleavages	Theo. MH+ [Da]	Abundance: F1: 126, Sample	Abundance: F1: 127, Sample	Abundance: F1: 128, Sample	Abundance: F1: 129, Sample	Abundance: F1: 130, Sample	Abundance: F1: 131, Sample	Charge (by Search Engine): Sequest HT	DeltaM [ppm] (by Search Engine): Sequest HT	RT [min] (by Search Engine): Sequest HT
	147.1	151.8	150.5	48.2	48.8	53.6	[R].TKYETELNLR.[M]	1xTMT6plex [K2]; 1xTMT6plex [N-Term]	1	1	1	Q6IFX2	Q6IFX2 [181-190]		1	1724.99	94.6	101.9	94	28.5	29.1	30.7	3	-1.58	49.1088
	161	145.1	162.5	41.9	46.3	43.3	[R].ILNEMRDQYEK.[M]	1xTMT6plex [K11]; 1xTMT6plex [N-Term]	2	2	1	Q6IFX2; Q61781	Q6IFX2 [262-272]; Q61781 [289-299]		1	1897.03	159.3	149.8	156.1	38.1	42.5	38.2	3	-2.24	54.8861
							[K].TRLEQEIATYRR.[L]	1xTMT6plex [N-Term]	3	5	1	Q9Z2K1; Q6IFX2; Q61781	Q9Z2K1 [404-415]; Q6IFX2 [385-396]; Q61781 [412-423]		2	1764.99							4	-1.15	47.748
	145.6	146.9	158.3	49.7	50.9	48.6	[K].DAEEWFFTK.[T]	1xTMT6plex [K9]; 1xTMT6plex [N-Term]	1	1	1	Q6IFX2	Q6IFX2 [280-288]		0	1630.85	183.7	193.5	194	57.7	59.6	54.7	2	-2.45	58.7873
							[RK].KNHEEEMNALR.[G]	1xTMT6plex [K1]; 1xTMT6plex [N-Term]	1	2	1	Q6IFX2	Q6IFX2 [230-240]		1	1828.97							4	-1.58	36.56
							[K].NHEEEMNALR.[G]	1xTMT6plex [N-Term]	1	2	1	Q6IFX2	Q6IFX2 [231-240]		0	1471.72							3	-4.11	35.8709
	140.2	142.6	143	63.3	50.1	60.7	[KR].DYSPYFK.[T]	1xTMT6plex [K7]; 1xTMT6plex [N-Term]	3	3	1	Q9Z2K1; Q6IFX2; Q61781	Q9Z2K1 [159-165]; Q6IFX2 [140-146]; Q61781 [167-173]		0	1377.75	244.6	259.7	242.2	101.6	81.1	94.4	2	3.23	54.1186
146.8	140.8	141.8	55.1	62.4	53.1	Q9D7I8	Protein FAM83D OS=Mus musculus OX=10090 GN=Fam83d PE=1 SV=1	2	1	1	1	585	64.3	6.77	145.8	146	136.8	50.3	57.5	47
	Abundances (Grouped): F1, 126	Abundances (Grouped): F1, 127	Abundances (Grouped): F1, 128	Abundances (Grouped): F1, 129	Abundances (Grouped): F1, 130	Abundances (Grouped): F1, 131	Annotated Sequence	Modifications	# Protein Groups	# Proteins	# PSMs	Master Protein Accessions	Positions in Master Proteins	Modifications in Master Proteins	# Missed Cleavages	Theo. MH+ [Da]	Abundance: F1: 126, Sample	Abundance: F1: 127, Sample	Abundance: F1: 128, Sample	Abundance: F1: 129, Sample	Abundance: F1: 130, Sample	Abundance: F1: 131, Sample	Charge (by Search Engine): Sequest HT	DeltaM [ppm] (by Search Engine): Sequest HT	RT [min] (by Search Engine): Sequest HT
	146.8	140.8	141.8	55.1	62.4	53.1	[R].ASTNLVSVR.[D]	1xTMT6plex [N-Term]	1	1	1	Q9D7I8	Q9D7I8 [568-576]		0	1175.69	145.8	146	136.8	50.3	57.5	47	2	-2.97	43.5543
146.3	150.1	146.2	53.8	51.2	52.4	Q9JM62	Receptor expression-enhancing protein 6 OS=Mus musculus OX=10090 GN=Reep6 PE=1 SV=1	29	4	4	4	201	22.2	7.33	743.2	796.2	721.1	251.4	241.3	237.5
	Abundances (Grouped): F1, 126	Abundances (Grouped): F1, 127	Abundances (Grouped): F1, 128	Abundances (Grouped): F1, 129	Abundances (Grouped): F1, 130	Abundances (Grouped): F1, 131	Annotated Sequence	Modifications	# Protein Groups	# Proteins	# PSMs	Master Protein Accessions	Positions in Master Proteins	Modifications in Master Proteins	# Missed Cleavages	Theo. MH+ [Da]	Abundance: F1: 126, Sample	Abundance: F1: 127, Sample	Abundance: F1: 128, Sample	Abundance: F1: 129, Sample	Abundance: F1: 130, Sample	Abundance: F1: 131, Sample	Charge (by Search Engine): Sequest HT	DeltaM [ppm] (by Search Engine): Sequest HT	RT [min] (by Search Engine): Sequest HT
	158.5	165.1	164.3	38.2	35.8	38.1	[K].NVATEALGALEAR.[T]	1xTMT6plex [N-Term]	1	2	1	Q9JM62	Q9JM62 [16-28]		0	1543.86	349.4	379.9	351.6	77.5	73.3	74.9	2	1.06	58.5828
	163.9	163.2	164.4	37.1	35.4	36	[R].ALVTPASTSEPPAALELDPK.[-]	1xTMT6plex [K20]; 1xTMT6plex [N-Term]	1	1	1	Q9JM62	Q9JM62 [182-201]		0	2465.39	104.7	108.8	102	21.8	21	20.5	3	-0.61	58.4249
	129.2	131.7	123.1	73.9	70.8	71.3	[R].ALDLAAGITR.[D]	1xTMT6plex [N-Term]	1	1	1	Q9JM62	Q9JM62 [162-171]		0	1229.74	289.1	307.5	267.5	152.1	147	142.1	2	-1.83	55.7568
							[K].HHMALDSAASQLSGR.[A]	1xTMT6plex [N-Term]	1	1	1	Q9JM62	Q9JM62 [147-161]		0	1809.92							3	-7.88	42.0126
146.3	106.4	78.1	70.8	83.4	115.1	A0A494BB76	Leucine zipper putative tumor suppressor 2 OS=Mus musculus OX=10090 GN=Lzts2 PE=1 SV=1	2	1	1	1	283	32.1	6.24	19.1	14.5	9.9	8.5	10.1	13.4
	Abundances (Grouped): F1, 126	Abundances (Grouped): F1, 127	Abundances (Grouped): F1, 128	Abundances (Grouped): F1, 129	Abundances (Grouped): F1, 130	Abundances (Grouped): F1, 131	Annotated Sequence	Modifications	# Protein Groups	# Proteins	# PSMs	Master Protein Accessions	Positions in Master Proteins	Modifications in Master Proteins	# Missed Cleavages	Theo. MH+ [Da]	Abundance: F1: 126, Sample	Abundance: F1: 127, Sample	Abundance: F1: 128, Sample	Abundance: F1: 129, Sample	Abundance: F1: 130, Sample	Abundance: F1: 131, Sample	Charge (by Search Engine): Sequest HT	DeltaM [ppm] (by Search Engine): Sequest HT	RT [min] (by Search Engine): Sequest HT
	146.3	106.4	78.1	70.8	83.4	115.1	[R].DSFEGER.[L]	1xTMT6plex [N-Term]	1	2	1	A0A494BB76	A0A494BB76 [208-214]		0	1068.52	19.1	14.5	9.9	8.5	10.1	13.4	2	-2.26	35.9081
146.1	143.3	146.8	55.2	54.7	54	P04104	Keratin, type II cytoskeletal 1 OS=Mus musculus OX=10090 GN=Krt1 PE=1 SV=4	4	3	3	2	637	65.6	8.15	508	520.3	495.7	176.5	176.6	167.3
	Abundances (Grouped): F1, 126	Abundances (Grouped): F1, 127	Abundances (Grouped): F1, 128	Abundances (Grouped): F1, 129	Abundances (Grouped): F1, 130	Abundances (Grouped): F1, 131	Annotated Sequence	Modifications	# Protein Groups	# Proteins	# PSMs	Master Protein Accessions	Positions in Master Proteins	Modifications in Master Proteins	# Missed Cleavages	Theo. MH+ [Da]	Abundance: F1: 126, Sample	Abundance: F1: 127, Sample	Abundance: F1: 128, Sample	Abundance: F1: 129, Sample	Abundance: F1: 130, Sample	Abundance: F1: 131, Sample	Charge (by Search Engine): Sequest HT	DeltaM [ppm] (by Search Engine): Sequest HT	RT [min] (by Search Engine): Sequest HT
							[R].FLEQQNQVLQTK.[W]	1xTMT6plex [K12]; 1xTMT6plex [N-Term]	2	5	1	Q6NXH9; P04104	Q6NXH9 [151-162]; P04104 [208-219]		0	1934.11							2	-5.02	56.092
	146.7	144.8	147.8	54.1	53.6	53.1	[R].TNAENEFVTIKK.[D]	2xTMT6plex [K11; K12]; 1xTMT6plex [N-Term]	1	1	1	P04104	P04104 [286-297]		1	2081.22	485.1	499.9	474.6	164.6	164.4	156.6	3	-1.3	52.063
	134.4	114.7	127.5	75.9	77.1	70.4	[R].TNAENEFVTIK.[K]	1xTMT6plex [K11]; 1xTMT6plex [N-Term]	1	1	1	P04104	P04104 [286-296]		0	1723.96	22.9	20.4	21.1	11.9	12.2	10.7	2	3.49	55.0937
146	144.5	144.6	54.6	55.2	55.1	P17710	Hexokinase-1 OS=Mus musculus OX=10090 GN=Hk1 PE=1 SV=3	37	42	59	40	974	108.2	6.8	7932.1	8193.9	7629.2	2726.6	2781.7	2668.4
	Abundances (Grouped): F1, 126	Abundances (Grouped): F1, 127	Abundances (Grouped): F1, 128	Abundances (Grouped): F1, 129	Abundances (Grouped): F1, 130	Abundances (Grouped): F1, 131	Annotated Sequence	Modifications	# Protein Groups	# Proteins	# PSMs	Master Protein Accessions	Positions in Master Proteins	Modifications in Master Proteins	# Missed Cleavages	Theo. MH+ [Da]	Abundance: F1: 126, Sample	Abundance: F1: 127, Sample	Abundance: F1: 128, Sample	Abundance: F1: 129, Sample	Abundance: F1: 130, Sample	Abundance: F1: 131, Sample	Charge (by Search Engine): Sequest HT	DeltaM [ppm] (by Search Engine): Sequest HT	RT [min] (by Search Engine): Sequest HT
	160	159.1	147.9	45.4	45.6	42	[R].GKFTTSDVAAIETDKEGVQNAK.[E]	3xTMT6plex [K2; K15; K22]; 1xTMT6plex [N-Term]	1	2	2	P17710	P17710 [388-409]		2	3225.81	659.9	684.7	592.2	172.3	174.3	154.2	4	-0.71	54.6792
	131.6	138.9	130.4	65.6	64.3	69.2	[K].GAALITAVGVR.[L]	1xTMT6plex [N-Term]	1	2	2	P17710	P17710 [956-966]		0	1256.79	356.4	392.6	343	163.4	161.5	167	2	-3.22	53.8747
	166.1	146.8	155.8	43.3	42.1	45.8	[K].FTTSDVAAIETDKEGVQNAK.[E]	2xTMT6plex [K13; K20]; 1xTMT6plex [N-Term]	1	2	1	P17710	P17710 [390-409]		1	2811.53	151.3	139.5	137.8	36.3	35.6	37.2	3	0.66	57.7629
	155.8	156.9	151.4	47.2	41.7	47.1	[R].FKASGVEGADVVK.[L]	2xTMT6plex [K2; K13]; 1xTMT6plex [N-Term]	1	4	1	P17710	P17710 [231-243]		1	1994.19	349	366.9	329.3	97.2	86.7	94.1	3	-2.45	49.4201
	146.5	151.2	152.8	48.8	49.9	50.7	[K].RAAQLCGAGMAAVVEK.[I]	1xCarbamidomethyl [C6]; 1xTMT6plex [K16]; 1xTMT6plex [N-Term]	1	2	1	P17710	P17710 [885-900]		1	2090.16	161.8	174.3	163.8	49.6	51.1	49.9	3	-3.28	51.2249
	134.8	144.2	150.8	60.7	46.3	63.3	[K].ATDCVGHDVATLLR.[D]	1xCarbamidomethyl [C4]; 1xTMT6plex [N-Term]	1	2	2	P17710	P17710 [681-694]		0	1756.92	43	48	46.7	17.8	13.7	18	3	-2.89	56.4981
	133	132	133.3	67.3	68.1	66.3	[K].ASGVEGADVVK.[L]	1xTMT6plex [K11]; 1xTMT6plex [N-Term]	1	4	2	P17710	P17710 [233-243]		0	1489.86	256.1	265.3	249.3	119.3	121.8	113.8	2	0.11	45.1849
	159.4	151.7	152.8	42.4	44.2	49.5	[R].AAQLCGAGMAAVVEK.[I]	1xCarbamidomethyl [C5]; 1xTMT6plex [K15]; 1xTMT6plex [N-Term]	1	2	2	P17710	P17710 [886-900]		0	1934.06	144.6	143.6	134.6	35.4	37.2	40	3	-6.56	56.1223
							[R].AAQLCGAGMAAVVEK.[I]	1xCarbamidomethyl [C5]; 1xOxidation [M9]; 1xTMT6plex [K15]; 1xTMT6plex [N-Term]	1	2	1	P17710	P17710 [886-900]		0	1950.06							3	-4.99	50.1589
	138.8	134.7	141.4	55	71.5	58.5	[K].VVDEYSLNSGK.[Q]	1xTMT6plex [K11]; 1xTMT6plex [N-Term]	1	2	2	P17710	P17710 [784-794]		0	1668.92	116.9	118.4	115.6	42.6	55.9	43.9	2	0.82	52.324
	151.1	148.3	148.5	51.5	50.4	50.3	[R].TTVGVDGSLYK.[M]	1xTMT6plex [K11]; 1xTMT6plex [N-Term]	1	2	2	P17710	P17710 [464-474]		0	1597.92	514.4	526.7	490.7	161.1	159.2	152.5	2	-0.18	51.3802
							[K].GAAMVTAVAYR.[L]	1xTMT6plex [N-Term]	2	4	1	O08528; P17710	O08528 [452-462]; P17710 [508-518]		0	1338.74							2	-6.81	50.2057
	151.2	139.4	176.3	50.7	45.1	37.3	[R].QIEETLSHFR.[L]	1xTMT6plex [N-Term]	1	2	2	P17710	P17710 [525-534]		0	1488.8	15.9	15.3	18	4.9	4.4	3.5	3	1.72	54.8615
	139.7	142.8	141.2	60.6	57.8	57.9	[K].TVCGVVSKR.[A]	1xCarbamidomethyl [C3]; 1xTMT6plex [K8]; 1xTMT6plex [N-Term]	1	2	1	P17710	P17710 [877-885]		1	1463.88	252.5	269.3	247.8	100.8	97	93.2	3	-2.17	39.1953
	137.5	133.3	129.3	60.6	69.8	69.4	[K].MVSGMYMGELVR.[L]	1xOxidation [M1]; 1xTMT6plex [N-Term]	1	2	1	P17710	P17710 [352-363]		0	1617.8	224.4	227	204.9	91	105.7	100.9	2	-1.35	57.4629
	165.4	142.7	155	44.7	43.7	48.5	[K].LRSEMEMGLR.[K]	1xTMT6plex [N-Term]	1	2	1	P17710	P17710 [547-556]		1	1450.77	31	27.9	28.2	7.7	7.6	8.1	3	-1.39	49.3579
	145.3	140.3	140.9	61.1	56.2	56.2	[R].FLLSESGSGK.[G]	1xTMT6plex [K10]; 1xTMT6plex [N-Term]	1	2	1	P17710	P17710 [498-507]		0	1482.86	1080	1088.7	1016.8	417.6	387.4	372.3	2	-1.52	55.9821
	127.7	132.9	133	69.9	67	69.5	[K].IDEAVLITWTK.[R]	1xTMT6plex [K11]; 1xTMT6plex [N-Term]	1	5	1	P17710	P17710 [219-229]		0	1747.04	332.8	361.6	336.6	167.5	162.1	161.5	2	-1.44	58.9181
	138.3	142.5	140.8	55.7	63.1	59.5	[R].GLDHLNVTVGVDGTLYK.[L]	1xTMT6plex [K17]; 1xTMT6plex [N-Term]	1	2	1	P17710	P17710 [906-922]		0	2259.27	701.2	754.3	693.2	259.9	297	268.8	3	-2.43	58.212
	171.7	137.1	142.5	46.6	46.2	55.9	[R].GQAVDVEPK.[I]	1xTMT6plex [K9]; 1xTMT6plex [N-Term]	1	3	1	P17710	P17710 [60-68]		0	1400.81	61.7	51.4	49.7	15.4	15.4	17.9	2	0.01	42.2882
	159.1	157	154.2	46.4	43.6	39.8	[R].SEMEMGLRK.[E]	1xTMT6plex [K9]; 1xTMT6plex [N-Term]	1	2	1	P17710	P17710 [549-557]		1	1538.84	247.2	254.6	232.7	66.3	62.8	55.1	3	0.81	46.6296
	130	132.1	137.4	63	69.5	68.1	[K].LRSEMEMGLRK.[E]	1xTMT6plex [K11]; 1xTMT6plex [N-Term]	1	2	1	P17710	P17710 [547-557]		2	1808.03	181.5	192.5	186.3	80.9	90.1	84.8	4	-5.73	47.7202
	139.7	160.9	167.4	43.3	46.9	41.9	[K].ESLLFEGR.[I]	1xTMT6plex [N-Term]	1	2	1	P17710	P17710 [372-379]		0	1179.66	112.3	135	130.7	32	35	30	2	-0.66	55.5685
							[K].QCSHHLYTMGQNCQR.[G]	2xCarbamidomethyl [C2; C13]; 1xTMT6plex [N-Term]	1	2	1	P17710	P17710 [45-59]		0	2148.97							4	-1.55	33.3573
							[R].HIDLVEGDEGR.[M]	1xTMT6plex [N-Term]	1	2	3	P17710	P17710 [300-310]		0	1468.76							3	1.31	44.526
	151.7	125.3	145.1	69.2	56.2	52.4	[K].RAAQLCGAGMAAVVEK.[I]	1xCarbamidomethyl [C6]; 1xOxidation [M10]; 1xTMT6plex [K16]; 1xTMT6plex [N-Term]	1	2	1	P17710	P17710 [885-900]		1	2106.16	22.4	19.3	20.8	9.4	7.7	6.9	3	-5.11	44.5467
	135.8	127.6	119.1	62.2	72.1	83.1	[R].SANLVAATLGAILNR.[L]	1xTMT6plex [N-Term]	1	2	1	P17710	P17710 [438-452]		0	1713.02	20.9	20.5	17.8	8.8	10.3	11.4	2	-0.53	59.3986
	156.7	158.9	155.3	49.9	44.5	34.6	[R].SEMEMGLR.[K]	1xTMT6plex [N-Term]	1	2	1	P17710	P17710 [549-556]		0	1181.59	23.9	25.3	23	7	6.3	4.7	2	0.85	47.4106
	148.4	139	150.2	53.1	53	56.3	[R].TEFDRELDRGSLNPGK.[Q]	1xTMT6plex [K16]; 1xTMT6plex [N-Term]	1	2	1	P17710	P17710 [331-346]		2	2292.23	56.8	55.5	55.8	18.7	18.8	19.2	4	0.17	50.4066
	151.8	141.5	154.2	49	51.5	52.1	[R].GQISEPLK.[T]	1xTMT6plex [K8]; 1xTMT6plex [N-Term]	1	2	1	P17710	P17710 [826-833]		0	1329.81	67.7	65.9	66.8	20.1	21.3	20.7	2	-1.6	46.391
							[R].QSGSENPASEDRRPLEK.[Q]	1xTMT6plex [K17]; 1xTMT6plex [N-Term]	1	2	1	P17710	P17710 [28-44]		1	2358.24							4	1.96	36.5694
	139.7	135.8	152.6	59.2	61.9	50.8	[R].ELDRGSLNPGK.[Q]	1xTMT6plex [K11]; 1xTMT6plex [N-Term]	1	2	1	P17710	P17710 [336-346]		1	1643.95	56.2	57	59.6	21.9	23.1	18.2	3	-0.47	42.9504
	168.6	157.9	156.2	36.3	39.9	41.1	[R].LVPDSDVR.[F]	1xTMT6plex [N-Term]	1	2	1	P17710	P17710 [490-497]		0	1129.64	166.2	162.4	149.5	32.9	36.5	36.1	2	-3.8	45.2174
							[R].TEFDRELDR.[G]	1xTMT6plex [N-Term]	1	2	1	P17710	P17710 [331-339]		1	1409.72							3	0.11	44.8671
							[R].ITPELLTR.[G]	1xTMT6plex [N-Term]	1	2	1	P17710	P17710 [380-387]		0	1171.72							2	-3.19	54.7304
	159.8	145.3	152.8	44.6	45.4	52.2	[R].SIPDGSEK.[G]	1xTMT6plex [K8]; 1xTMT6plex [N-Term]	1	4	1	P17710	P17710 [126-133]		0	1290.73	57.3	54.4	53.2	14.7	15.1	16.7	2	-0.69	41.6058
							[R].RLVPDSDVR.[F]	1xTMT6plex [N-Term]	1	2	1	P17710	P17710 [489-497]		1	1285.74							3	-0.38	38.7463
	154.4	146.5	151.5	47.8	50	49.8	[K].QALMEVK.[K]	1xTMT6plex [K7]; 1xTMT6plex [N-Term]	1	2	2	P17710	P17710 [538-544]		0	1276.77	997.1	987.4	950	283.9	299.3	286.7	2	-1	49.9681
							[K].IRPPLTEEKIDK.[Y]	2xTMT6plex [K9; K12]; 1xTMT6plex [N-Term]	1	3	1	P17710	P17710 [69-80]		1	2126.32							4	-5.93	47.9931
							[R].TVEMHNK.[I]	1xTMT6plex [K7]; 1xTMT6plex [N-Term]	1	2	1	P17710	P17710 [608-614]		0	1316.74							3	-1.12	34.5324
	142.7	148.8	151.9	50.3	53.3	53	[R].LALLQVR.[AR]	1xTMT6plex [N-Term]	1	3	1	P17710	P17710 [851-857]		0	1041.7	281.8	306.6	291.3	91.4	97.6	93.3	2	-1.46	58.4288
	121.6	126	138.8	66.8	62.7	84.2	[K].GAAMVTAVAYR.[L]	1xOxidation [M4]; 1xTMT6plex [N-Term]	2	4	2	O08528; P17710	O08528 [452-462]; P17710 [508-518]		0	1354.74	78.4	84.8	86.9	39.6	37.5	48.4	2	-2.49	43.3798
	141.8	131.7	142.8	58.2	68.5	57	[K].LHPHFSR.[I]	1xTMT6plex [N-Term]	1	3	3	P17710	P17710 [923-929]		0	1122.64	62	60.1	60.6	23.4	27.8	22.2	3	-3.01	33.2755
							[K].MLPTFVR.[SA]	1xTMT6plex [N-Term]	2	8	1	O08528; P17710	O08528 [63-69]; P17710 [119-125]		0	1092.64							2	-1.11	58.1284
	138.1	159	137.7	49.9	59.2	56.1	[R].GSLNPGK.[Q]	1xTMT6plex [K7]; 1xTMT6plex [N-Term]	1	2	1	P17710	P17710 [340-346]		0	1130.69	47.5	57.1	46	15.8	18.9	17.2	2	-3.88	38.446
146	148.2	155.7	46.7	56.3	47.1	P50446	Keratin, type II cytoskeletal 6A OS=Mus musculus OX=10090 GN=Krt6a PE=1 SV=3	13	8	9	4	553	59.3	7.94	121.6	128.8	125.9	35.8	43.5	35
	Abundances (Grouped): F1, 126	Abundances (Grouped): F1, 127	Abundances (Grouped): F1, 128	Abundances (Grouped): F1, 129	Abundances (Grouped): F1, 130	Abundances (Grouped): F1, 131	Annotated Sequence	Modifications	# Protein Groups	# Proteins	# PSMs	Master Protein Accessions	Positions in Master Proteins	Modifications in Master Proteins	# Missed Cleavages	Theo. MH+ [Da]	Abundance: F1: 126, Sample	Abundance: F1: 127, Sample	Abundance: F1: 128, Sample	Abundance: F1: 129, Sample	Abundance: F1: 130, Sample	Abundance: F1: 131, Sample	Charge (by Search Engine): Sequest HT	DeltaM [ppm] (by Search Engine): Sequest HT	RT [min] (by Search Engine): Sequest HT
	166.3	152.8	162.9	40	44	34.1	[K].YEELQVTAGR.[H]	1xTMT6plex [N-Term]	1	6	1	P50446	P50446 [349-358]		0	1394.75	49.3	47.3	46.9	10.9	12.1	9	2	0.23	49.1852
	134.9	158.7	159.3	57.9	46.3	43	[RK].SRAEAESWYQTK.[Y]	1xTMT6plex [K12]; 1xTMT6plex [N-Term]	1	6	1	P50446	P50446 [337-348]		1	1914.01	40.8	50.1	46.8	16.1	13	11.6	3	-0.27	47.661
	134.7	128.7	141.8	40.9	84.8	69.1	[K].AQYEDIAQR.[S]	1xTMT6plex [N-Term]	1	3	1	P50446	P50446 [328-336]		0	1322.69	31.5	31.4	32.2	8.8	18.4	14.4	2	0.77	42.8091
	87.8	91.2	88.9	113.6	110.4	108	[R].FLEQQNK.[AILVM]	1xTMT6plex [K7]; 1xTMT6plex [N-Term]	4	22	2	P50446; Q3UV17; Q922U2; P20152	P50446 [172-178]; Q3UV17 [185-191]; Q922U2 [182-188]; P20152 [123-129]		0	1364.79	395.3	428.4	388.6	470.2	461.2	433.4	2	-0.31	48.304
							[R].NTKQEIAEINR.[MI]	1xTMT6plex [K3]; 1xTMT6plex [N-Term]	1	6	1	P50446	P50446 [365-375]		1	1774.02							3	-0.79	43.7287
							[K].LLEGEECR.[MLI]	1xCarbamidomethyl [C7]; 1xTMT6plex [N-Term]	5	11	1	Q3TTY5; Q6NXH9; P50446; Q3UV17; Q922U2	Q3TTY5 [504-511]; Q6NXH9 [436-443]; P50446 [457-464]; Q3UV17 [472-479]; Q922U2 [467-474]		0	1234.63							2	-0.08	45.1569
	118.1	124.7	126.2	88.1	77.7	65.2	[K].DVDAAYMNK.[V]	1xTMT6plex [K9]; 1xTMT6plex [N-Term]	2	4	1	P50446; Q922U2	P50446 [262-270]; Q922U2 [272-280]		0	1484.78	18.5	20.4	19.2	12.7	11.3	9.1	2	0.4	49.7925
							[R].GRLDSELR.[N]	1xTMT6plex [N-Term]	2	4	1	P50446; Q922U2	P50446 [222-229]; Q922U2 [232-239]		1	1174.67							3	-2.12	37.1956
145.8	136.4	126.9	69.8	68.1	53.1	A8Y5G9	U7 snRNA-associated Sm-like protein LSm10 (Fragment) OS=Mus musculus OX=10090 GN=Lsm10 PE=1 SV=1	11	1	1	1	93	10.5	5.39	71.8	70.1	60.7	31.6	31.1	23.3
	Abundances (Grouped): F1, 126	Abundances (Grouped): F1, 127	Abundances (Grouped): F1, 128	Abundances (Grouped): F1, 129	Abundances (Grouped): F1, 130	Abundances (Grouped): F1, 131	Annotated Sequence	Modifications	# Protein Groups	# Proteins	# PSMs	Master Protein Accessions	Positions in Master Proteins	Modifications in Master Proteins	# Missed Cleavages	Theo. MH+ [Da]	Abundance: F1: 126, Sample	Abundance: F1: 127, Sample	Abundance: F1: 128, Sample	Abundance: F1: 129, Sample	Abundance: F1: 130, Sample	Abundance: F1: 131, Sample	Charge (by Search Engine): Sequest HT	DeltaM [ppm] (by Search Engine): Sequest HT	RT [min] (by Search Engine): Sequest HT
	145.8	136.4	126.9	69.8	68.1	53.1	[-].MALSHSVKER.[T]	1xTMT6plex [K8]; 1xTMT6plex [N-Term]; 1xMet-loss [N-Term]	1	2	1	A8Y5G9	A8Y5G9 [1-10]	A8Y5G9 1xMet-loss [N-Term]	1	1484.89	71.8	70.1	60.7	31.6	31.1	23.3	3	0.88	36.8742
145.7	135.5	150.1	63.1	49.7	55.9	Q9D3X9	Microfibrillar-associated protein 3-like OS=Mus musculus OX=10090 GN=Mfap3l PE=1 SV=1	10	3	3	3	409	45.3	5.08	51.5	50	51.5	20.5	16.3	17.6
	Abundances (Grouped): F1, 126	Abundances (Grouped): F1, 127	Abundances (Grouped): F1, 128	Abundances (Grouped): F1, 129	Abundances (Grouped): F1, 130	Abundances (Grouped): F1, 131	Annotated Sequence	Modifications	# Protein Groups	# Proteins	# PSMs	Master Protein Accessions	Positions in Master Proteins	Modifications in Master Proteins	# Missed Cleavages	Theo. MH+ [Da]	Abundance: F1: 126, Sample	Abundance: F1: 127, Sample	Abundance: F1: 128, Sample	Abundance: F1: 129, Sample	Abundance: F1: 130, Sample	Abundance: F1: 131, Sample	Charge (by Search Engine): Sequest HT	DeltaM [ppm] (by Search Engine): Sequest HT	RT [min] (by Search Engine): Sequest HT
							[R].HTPEGQEAPDRDEVYTIPNSLK.[R]	1xTMT6plex [K22]; 1xTMT6plex [N-Term]	1	1	1	Q9D3X9	Q9D3X9 [273-294]		1	2954.53							4	-1.04	51.9181
	108.5	98	139.5	105.4	79.6	69	[R].NTCIIYESHV.[-]	1xCarbamidomethyl [C3]; 1xTMT6plex [N-Term]	1	1	1	Q9D3X9	Q9D3X9 [400-409]		0	1464.74	14.1	13.3	17.6	12.6	9.6	8	2	2.76	51.0745
	167.4	157.4	156.3	38.4	32.3	48.2	[R].YIEELAR.[S]	1xTMT6plex [N-Term]	1	3	1	Q9D3X9	Q9D3X9 [233-239]		0	1122.64	37.4	36.7	33.9	7.9	6.7	9.6	2	-3.4	52.7273
145.2	100.5	117.4	79.9	86.1	71	B1ASB6	SPOC domain-containing protein 1 OS=Mus musculus OX=10090 GN=Spocd1 PE=1 SV=3	1	1	1	1	1015	110.7	5.49	69.8	50.4	54.8	35.3	38.4	30.4
	Abundances (Grouped): F1, 126	Abundances (Grouped): F1, 127	Abundances (Grouped): F1, 128	Abundances (Grouped): F1, 129	Abundances (Grouped): F1, 130	Abundances (Grouped): F1, 131	Annotated Sequence	Modifications	# Protein Groups	# Proteins	# PSMs	Master Protein Accessions	Positions in Master Proteins	Modifications in Master Proteins	# Missed Cleavages	Theo. MH+ [Da]	Abundance: F1: 126, Sample	Abundance: F1: 127, Sample	Abundance: F1: 128, Sample	Abundance: F1: 129, Sample	Abundance: F1: 130, Sample	Abundance: F1: 131, Sample	Charge (by Search Engine): Sequest HT	DeltaM [ppm] (by Search Engine): Sequest HT	RT [min] (by Search Engine): Sequest HT
	145.2	100.5	117.4	79.9	86.1	71	[K].APGPAPASSPEVLK.[V]	1xTMT6plex [K14]; 1xTMT6plex [N-Term]	1	2	1	B1ASB6	B1ASB6 [646-659]		0	1779.04	69.8	50.4	54.8	35.3	38.4	30.4	3	-5.86	55.1633
144.6	135.7	135.4	57.1	64.7	62.6	A0A7N9VT24	IQ domain-containing protein F3 OS=Mus musculus OX=10090 GN=Iqcf3 PE=4 SV=1	36	5	7	5	278	32.4	5.34	272	266.3	247.2	98.7	112.9	104.9
	Abundances (Grouped): F1, 126	Abundances (Grouped): F1, 127	Abundances (Grouped): F1, 128	Abundances (Grouped): F1, 129	Abundances (Grouped): F1, 130	Abundances (Grouped): F1, 131	Annotated Sequence	Modifications	# Protein Groups	# Proteins	# PSMs	Master Protein Accessions	Positions in Master Proteins	Modifications in Master Proteins	# Missed Cleavages	Theo. MH+ [Da]	Abundance: F1: 126, Sample	Abundance: F1: 127, Sample	Abundance: F1: 128, Sample	Abundance: F1: 129, Sample	Abundance: F1: 130, Sample	Abundance: F1: 131, Sample	Charge (by Search Engine): Sequest HT	DeltaM [ppm] (by Search Engine): Sequest HT	RT [min] (by Search Engine): Sequest HT
	187.5	167.6	176.3	17.7	31.6	19.3	[K].QIQEEKCETQEADRSEGTELGK.[-L]	1xCarbamidomethyl [C7]; 2xTMT6plex [K6; K22]; 1xTMT6plex [N-Term]	1	3	1	A0A7N9VT24	A0A7N9VT24 [96-117]		2	3252.66	40.3	37.6	36.8	3.5	6.3	3.7	4	0.73	45.4281
	193.9	177.1	161.7	14.4	34.1	18.7	[EK].QNQDEETEAEAEEADK.[A]	1xTMT6plex [K16]; 1xTMT6plex [N-Term]	1	5	2	A0A7N9VT24	A0A7N9VT24 [26-41]; [61-76]		0	2294.07	45.3	43.2	36.7	3.1	7.4	3.9	3	-3.57	43.211
	151.6	159.2	157.7	41.8	41.5	48.3	[EK].QNQDEETEAEAEEADKAILER.[S]	1xTMT6plex [K16]; 1xTMT6plex [N-Term]	1	5	1	A0A7N9VT24	A0A7N9VT24 [26-46]; [61-81]		1	2876.42	69.7	76.4	70.4	17.7	17.7	19.8	3	-0.9	55.4254
	113.1	100.1	103.5	88.9	96.9	97.6	[K].LLPLKQPK.[D]	2xTMT6plex [K5; K8]; 1xTMT6plex [N-Term]	1	2	1	A0A7N9VT24	A0A7N9VT24 [140-147]		1	1624.11	96.4	89	85.6	69.7	76.6	74.1	3	-3.36	53.4367
	169.2	160.5	151.9	42.6	44	31.8	[R].SDSVKTECPPQAEK.[Q]	1xCarbamidomethyl [C8]; 2xTMT6plex [K5; K14]; 1xTMT6plex [N-Term]	1	4	2	A0A7N9VT24	A0A7N9VT24 [47-60]; [82-95]		1	2263.22	20.3	20.1	17.7	4.7	4.9	3.4	4	-0.01	40.8191
144.2	140.7	124.1	68.1	58.9	64	A2AQM9	Nuclear receptor coactivator 6 (Fragment) OS=Mus musculus OX=10090 GN=Ncoa6 PE=1 SV=8	1	1	1	1	1516	163	9.6	49.3	50.2	41.2	21.4	18.7	19.5
	Abundances (Grouped): F1, 126	Abundances (Grouped): F1, 127	Abundances (Grouped): F1, 128	Abundances (Grouped): F1, 129	Abundances (Grouped): F1, 130	Abundances (Grouped): F1, 131	Annotated Sequence	Modifications	# Protein Groups	# Proteins	# PSMs	Master Protein Accessions	Positions in Master Proteins	Modifications in Master Proteins	# Missed Cleavages	Theo. MH+ [Da]	Abundance: F1: 126, Sample	Abundance: F1: 127, Sample	Abundance: F1: 128, Sample	Abundance: F1: 129, Sample	Abundance: F1: 130, Sample	Abundance: F1: 131, Sample	Charge (by Search Engine): Sequest HT	DeltaM [ppm] (by Search Engine): Sequest HT	RT [min] (by Search Engine): Sequest HT
	144.2	140.7	124.1	68.1	58.9	64	[K].EQVNTELK.[V]	1xTMT6plex [K8]; 1xTMT6plex [N-Term]	1	3	1	A2AQM9	A2AQM9 [1441-1448]		0	1418.83	49.3	50.2	41.2	21.4	18.7	19.5	2	-2.32	40.9454
144	138.8	137.2	59.7	60	60.4	Q8K1M3	Protein kinase, cAMP dependent regulatory, type II alpha OS=Mus musculus OX=10090 GN=Prkar2a PE=1 SV=1	52	20	24	19	402	45.6	4.93	4118.4	4143.5	3811.6	1570.1	1592	1539.1
	Abundances (Grouped): F1, 126	Abundances (Grouped): F1, 127	Abundances (Grouped): F1, 128	Abundances (Grouped): F1, 129	Abundances (Grouped): F1, 130	Abundances (Grouped): F1, 131	Annotated Sequence	Modifications	# Protein Groups	# Proteins	# PSMs	Master Protein Accessions	Positions in Master Proteins	Modifications in Master Proteins	# Missed Cleavages	Theo. MH+ [Da]	Abundance: F1: 126, Sample	Abundance: F1: 127, Sample	Abundance: F1: 128, Sample	Abundance: F1: 129, Sample	Abundance: F1: 130, Sample	Abundance: F1: 131, Sample	Charge (by Search Engine): Sequest HT	DeltaM [ppm] (by Search Engine): Sequest HT	RT [min] (by Search Engine): Sequest HT
	124.6	163.5	137.7	63.1	60.7	50.4	[K].IVKTDEHVIDQGDDGDNFYVIER.[G]	1xTMT6plex [K3]; 1xTMT6plex [N-Term]	1	4	1	Q8K1M3	Q8K1M3 [157-179]		1	3135.6	21.9	30	23.5	10.2	9.9	7.9	4	0.18	56.6301
							[R].RVSVCAETFNPDEEEEDNDPR.[V]	1xCarbamidomethyl [C5]; 1xTMT6plex [N-Term]	1	3	1	Q8K1M3	Q8K1M3 [95-115]		1	2737.22							3	-0.98	48.9185
	140.8	142.8	146.2	56.9	57	56.2	[K].MFESFIESVPLFK.[S]	1xTMT6plex [K13]; 1xTMT6plex [N-Term]	1	4	1	Q8K1M3	Q8K1M3 [249-261]		0	2032.12	555.5	588.1	559.9	206.4	208.6	197.7	2	-3.84	59.5461
							[R].GTYDILVTKDNQTR.[S]	1xTMT6plex [K9]; 1xTMT6plex [N-Term]	1	4	1	Q8K1M3	Q8K1M3 [180-193]		1	2082.16							3	-1.64	51.6679
	128.1	129.8	132.3	62.5	73	74.3	[K].TDEHVIDQGDDGDNFYVIER.[G]	1xTMT6plex [N-Term]	1	4	2	Q8K1M3	Q8K1M3 [160-179]		0	2566.19	144.4	152.7	144.8	64.8	76.3	74.6	3	-5.13	54.5066
	154.6	156	147	45.9	48.9	47.6	[K].NLDQEQLSQVLDAMFEK.[I]	1xTMT6plex [K17]; 1xTMT6plex [N-Term]	1	4	1	Q8K1M3	Q8K1M3 [140-156]		0	2466.3	318.3	335.3	293.9	87	93.5	87.3	3	0.22	59.3283
							[K].NGGNQEVEIAHCHK.[G]	1xCarbamidomethyl [C12]; 1xTMT6plex [K14]; 1xTMT6plex [N-Term]	1	3	3	Q8K1M3	Q8K1M3 [317-330]		0	2051.05							4	-0.99	36.008
	310.7	91.6	95.8	30.5	37.4	34	[K].RNISHYEEQLVK.[M]	1xTMT6plex [K12]; 1xTMT6plex [N-Term]	1	3	1	Q8K1M3	Q8K1M3 [378-389]		1	1974.12	190.7	58.7	57.1	17.2	21.3	18.6	4	-0.7	46.4081
	145.4	157.8	156	35.4	51.9	53.5	[R].QQPPDLVDFAVEYFTR.[L]	1xTMT6plex [N-Term]	1	2	1	Q8K1M3	Q8K1M3 [24-39]		0	2154.11	30.8	34.9	32.1	6.9	10.2	10.1	2	-1.2	59.4972
	162.3	145.3	142.4	52.2	53.2	44.6	[R].AASAYAVGDVK.[C]	1xTMT6plex [K11]; 1xTMT6plex [N-Term]	1	2	1	Q8K1M3	Q8K1M3 [346-356]		0	1509.87	137.7	128.7	117.3	40.7	41.9	33.7	2	-2.32	48.2591
							[R].VSVCAETFNPDEEEEDNDPR.[V]	1xCarbamidomethyl [C4]; 1xTMT6plex [N-Term]	1	3	1	Q8K1M3	Q8K1M3 [96-115]		0	2581.12							3	0.71	53.8094
	141.9	147.8	138.2	57.7	59.9	54.4	[R].NISHYEEQLVK.[M]	1xTMT6plex [K11]; 1xTMT6plex [N-Term]	1	3	1	Q8K1M3	Q8K1M3 [379-389]		0	1818.02	168.2	182.8	159	62.9	65.9	57.5	3	-0.22	52.0808
	125.7	122.7	119.8	76.8	76.2	78.8	[R].LLGPCMDIMKR.[N]	1xCarbamidomethyl [C5]; 1xTMT6plex [K10]; 1xTMT6plex [N-Term]	1	3	1	Q8K1M3	Q8K1M3 [368-378]		1	1792	606.5	617.9	561.1	340.5	340.9	338.8	3	-1.79	58.0185
	145.4	141	142.5	57.1	57.2	56.8	[R].GTYDILVTK.[D]	1xTMT6plex [K9]; 1xTMT6plex [N-Term]	1	4	1	Q8K1M3	Q8K1M3 [180-188]		0	1467.88	630.2	637.8	599.7	227.8	230.1	219.3	2	-0.72	56.5826
	144.1	122.1	138.5	65.6	59.3	70.5	[K].MFGSNLDLMDPGQ.[-]	2xOxidation [M1; M9]; 1xTMT6plex [N-Term]	1	3	1	Q8K1M3	Q8K1M3 [390-402]		0	1685.77	40.6	35.9	37.9	17	15.5	17.7	2	-0.17	58.2272
							[R].GSFGELALMYNTPR.[A]	1xTMT6plex [N-Term]	2	6	1	H3BK84; Q8K1M3	H3BK84 [57-70]; Q8K1M3 [202-215]		0	1784.92							2	-4.93	58.6336
	138.8	135.3	137.4	62.4	62.7	63.5	[K].IVDVIGEK.[I]	1xTMT6plex [K8]; 1xTMT6plex [N-Term]	1	4	2	Q8K1M3	Q8K1M3 [271-278]		0	1330.83	828.7	843.3	796.6	343	347.3	338	2	-2.23	57.4078
	132.6	161.1	134.2	60.3	50	61.8	[K].SLEMSER.[M]	1xTMT6plex [N-Term]	1	4	1	Q8K1M3	Q8K1M3 [262-268]		0	1080.56	138.2	175.2	135.8	57.8	48.4	57.4	2	-0.9	40.0984
	156.4	160.1	153	45.3	42.5	42.7	[R].IIAQGEK.[A]	1xTMT6plex [K7]; 1xTMT6plex [N-Term]	1	3	1	Q8K1M3	Q8K1M3 [286-292]		0	1216.77	269.4	287.9	256	71.7	67.9	65.6	2	-4.03	43.9098
	141.7	124.9	144.4	66.9	58.6	63.5	[R].SVGQYDNR.[G]	1xTMT6plex [N-Term]	1	4	1	Q8K1M3	Q8K1M3 [194-201]		0	1167.6	37.3	34.3	36.9	16.2	14.3	14.9	2	-0.16	33.7338
143.9	152.1	159.1	47.6	46.4	50.9	Q9D5N8	Spermidine/spermine N(1)-acetyltransferase-like protein 1 OS=Mus musculus OX=10090 GN=Satl1 PE=2 SV=2	12	6	6	6	744	83.2	4.78	189.1	208.5	202.9	57.5	56.6	59.6
	Abundances (Grouped): F1, 126	Abundances (Grouped): F1, 127	Abundances (Grouped): F1, 128	Abundances (Grouped): F1, 129	Abundances (Grouped): F1, 130	Abundances (Grouped): F1, 131	Annotated Sequence	Modifications	# Protein Groups	# Proteins	# PSMs	Master Protein Accessions	Positions in Master Proteins	Modifications in Master Proteins	# Missed Cleavages	Theo. MH+ [Da]	Abundance: F1: 126, Sample	Abundance: F1: 127, Sample	Abundance: F1: 128, Sample	Abundance: F1: 129, Sample	Abundance: F1: 130, Sample	Abundance: F1: 131, Sample	Charge (by Search Engine): Sequest HT	DeltaM [ppm] (by Search Engine): Sequest HT	RT [min] (by Search Engine): Sequest HT
	107.8	121.4	134.1	75.3	75.8	85.7	[R].YSMCQSSGSQSSMK.[E]	1xCarbamidomethyl [C4]; 1xTMT6plex [K14]; 1xTMT6plex [N-Term]	1	2	1	Q9D5N8	Q9D5N8 [317-330]		0	2025.94	49.5	58.2	59.8	31.8	32.3	35.1	3	-2.31	44.4758
							[R].QPGTTQLGTNQLDTNQPDGTQSSQGGK.[T]	1xTMT6plex [K27]; 1xTMT6plex [N-Term]	1	2	1	Q9D5N8	Q9D5N8 [482-508]		0	3216.61							3	-4.38	46.8914
							[K].ELASYEGMEEK.[V]	1xTMT6plex [K11]; 1xTMT6plex [N-Term]	1	2	1	Q9D5N8	Q9D5N8 [597-607]		0	1743.89							3	-0.94	53.5211
	171.7	185.2	185.3	18.3	19.7	19.8	[K].TQSDKLEPSPR.[K]	1xTMT6plex [K5]; 1xTMT6plex [N-Term]	1	2	1	Q9D5N8	Q9D5N8 [509-519]		1	1715.97	102.1	115	107	10	10.9	10.5	3	-0.65	37.3535
	144.5	130.3	143.3	65.8	55.6	60.5	[K].YSESGPWSPR.[H]	1xTMT6plex [N-Term]	1	2	1	Q9D5N8	Q9D5N8 [404-413]		0	1394.69	37.5	35.3	36.1	15.7	13.4	14	2	-1.24	49.3734
							[K].TPSSSGQQDPSQQIVR.[H]	1xTMT6plex [N-Term]	1	1	1	Q9D5N8	Q9D5N8 [259-274]		0	1944							3	0.34	39.2094
143.7	176.9	181.5	34.4	32.7	30.9	Q99MY0	Spermatogenic leucine zipper protein 1 OS=Mus musculus OX=10090 GN=Spz1 PE=1 SV=1	7	3	3	3	378	43.1	8.81	66.3	85.2	81.3	14.6	14	12.7
	Abundances (Grouped): F1, 126	Abundances (Grouped): F1, 127	Abundances (Grouped): F1, 128	Abundances (Grouped): F1, 129	Abundances (Grouped): F1, 130	Abundances (Grouped): F1, 131	Annotated Sequence	Modifications	# Protein Groups	# Proteins	# PSMs	Master Protein Accessions	Positions in Master Proteins	Modifications in Master Proteins	# Missed Cleavages	Theo. MH+ [Da]	Abundance: F1: 126, Sample	Abundance: F1: 127, Sample	Abundance: F1: 128, Sample	Abundance: F1: 129, Sample	Abundance: F1: 130, Sample	Abundance: F1: 131, Sample	Charge (by Search Engine): Sequest HT	DeltaM [ppm] (by Search Engine): Sequest HT	RT [min] (by Search Engine): Sequest HT
	129.2	186.3	179.4	39	36.7	29.4	[K].NIAGVEEK.[S]	1xTMT6plex [K8]; 1xTMT6plex [N-Term]	1	1	1	Q99MY0	Q99MY0 [82-89]		0	1317.78	28.1	42.3	37.9	7.8	7.4	5.7	2	-0.87	45.4576
	156.6	168.5	183.2	30.3	29.2	32.2	[K].NSICPVEK.[R]	1xCarbamidomethyl [C4]; 1xTMT6plex [K8]; 1xTMT6plex [N-Term]	1	1	1	Q99MY0	Q99MY0 [55-62]		0	1404.79	38.2	42.9	43.4	6.8	6.6	7	2	-2.86	43.886
							[K].QHNELSELMR.[S]	1xTMT6plex [N-Term]	1	1	1	Q99MY0	Q99MY0 [209-218]		0	1485.77							3	-0.27	49.1631
143.6	145	144.3	56.6	57.7	52.9	Q0P557	Mitochondria-eating protein OS=Mus musculus OX=10090 GN=Spata18 PE=1 SV=2	20	8	13	8	537	60.4	8.59	639.6	674.2	623.9	231.7	238.5	210
	Abundances (Grouped): F1, 126	Abundances (Grouped): F1, 127	Abundances (Grouped): F1, 128	Abundances (Grouped): F1, 129	Abundances (Grouped): F1, 130	Abundances (Grouped): F1, 131	Annotated Sequence	Modifications	# Protein Groups	# Proteins	# PSMs	Master Protein Accessions	Positions in Master Proteins	Modifications in Master Proteins	# Missed Cleavages	Theo. MH+ [Da]	Abundance: F1: 126, Sample	Abundance: F1: 127, Sample	Abundance: F1: 128, Sample	Abundance: F1: 129, Sample	Abundance: F1: 130, Sample	Abundance: F1: 131, Sample	Charge (by Search Engine): Sequest HT	DeltaM [ppm] (by Search Engine): Sequest HT	RT [min] (by Search Engine): Sequest HT
	199.6	200	161.9		38.5		[K].NRDNSPDQDQHQSDNESFSETQPTQVQDDLAESGK.[S]	1xTMT6plex [K35]; 1xTMT6plex [N-Term]	1	1	1	Q0P557	Q0P557 [111-145]		1	4405.01	24	25.1	18.9		4.3		4	4.28	50.197
	162.3	161.4	137.9	47.6	40	50.9	[K].EEIAVLSAEK.[S]	1xTMT6plex [K10]; 1xTMT6plex [N-Term]	1	3	1	Q0P557	Q0P557 [225-234]		0	1546.91	31.5	32.7	26	8.5	7.2	8.8	2	0.87	56.2113
	154.4	150.1	161.8	47.7	43.3	42.6	[K].SESLQALQDK.[V]	1xTMT6plex [K10]; 1xTMT6plex [N-Term]	1	2	2	Q0P557	Q0P557 [11-20]		0	1576.89	63	63.9	64.1	17.9	16.4	15.5	2	1.34	51.4534
	149.9	154.9	156	44.1	48.6	46.5	[R].FSDAYSQAR.[L]	1xTMT6plex [N-Term]	1	4	3	Q0P557	Q0P557 [304-312]		0	1273.64	175.6	189.4	177.5	47.5	52.8	48.6	2	-2.67	44.862
	146.9	148.6	128.6	56.8	64.6	54.5	[K].RTQDQRPQDVVSNYEK.[H]	1xTMT6plex [K16]; 1xTMT6plex [N-Term]	1	3	3	Q0P557	Q0P557 [203-218]		1	2421.29	36	38	30.6	12.8	14.7	11.9	4	-4.17	42.8026
	107.3	104.8	103.8	97.2	101.3	85.5	[R].NHFGISTVSR.[S]	1xTMT6plex [N-Term]	1	1	1	Q0P557	Q0P557 [514-523]		0	1346.74	80.5	82.1	75.6	67.1	70.5	57.2	3	-1.7	40.9341
	146.3	148.7	152.1	54.1	50	48.7	[R].LDAQCLLRR.[C]	1xCarbamidomethyl [C5]; 1xTMT6plex [N-Term]	1	4	1	Q0P557	Q0P557 [313-321]		1	1373.79	229	243	231.2	77.9	72.6	68	3	-6.01	49.6668
							[R].CIDRAETVQR.[I]	1xCarbamidomethyl [C1]; 1xTMT6plex [N-Term]	1	4	1	Q0P557	Q0P557 [322-331]		1	1476.78							3	0.65	33.3792
142.7	144	121.2	61.5	68.7	62	Q00420	GA-binding protein subunit beta-1 OS=Mus musculus OX=10090 GN=Gabpb1 PE=1 SV=2	4	2	3	2	383	41.3	4.84	89.4	94.1	73.7	35.4	39.9	34.6
	Abundances (Grouped): F1, 126	Abundances (Grouped): F1, 127	Abundances (Grouped): F1, 128	Abundances (Grouped): F1, 129	Abundances (Grouped): F1, 130	Abundances (Grouped): F1, 131	Annotated Sequence	Modifications	# Protein Groups	# Proteins	# PSMs	Master Protein Accessions	Positions in Master Proteins	Modifications in Master Proteins	# Missed Cleavages	Theo. MH+ [Da]	Abundance: F1: 126, Sample	Abundance: F1: 127, Sample	Abundance: F1: 128, Sample	Abundance: F1: 129, Sample	Abundance: F1: 130, Sample	Abundance: F1: 131, Sample	Charge (by Search Engine): Sequest HT	DeltaM [ppm] (by Search Engine): Sequest HT	RT [min] (by Search Engine): Sequest HT
	142.7	144	121.2	61.5	68.7	62	[-].MSLVDLGK.[RK]	1xTMT6plex [K8]; 1xTMT6plex [N-Term]; 1xMet-loss+Acetyl [N-Term]	1	6	2	Q00420	Q00420 [1-8]	Q00420 1xMet-loss+Acetyl [N-Term]	0	1231.77	89.4	94.1	73.7	35.4	39.9	34.6	2	1	51.2615
							[R].VECAEIEER.[E]	1xCarbamidomethyl [C3]; 1xTMT6plex [N-Term]	1	1	1	Q00420	Q00420 [327-335]		0	1363.67							2	-4.88	42.7163
142.4	87.5	80.2	123.9	77.6	88.3	Q8VDF2	E3 ubiquitin-protein ligase UHRF1 OS=Mus musculus OX=10090 GN=Uhrf1 PE=1 SV=2	3	2	3	2	782	88.2	8.31	17	10.9	9.3	13.6	8.6	9.4
	Abundances (Grouped): F1, 126	Abundances (Grouped): F1, 127	Abundances (Grouped): F1, 128	Abundances (Grouped): F1, 129	Abundances (Grouped): F1, 130	Abundances (Grouped): F1, 131	Annotated Sequence	Modifications	# Protein Groups	# Proteins	# PSMs	Master Protein Accessions	Positions in Master Proteins	Modifications in Master Proteins	# Missed Cleavages	Theo. MH+ [Da]	Abundance: F1: 126, Sample	Abundance: F1: 127, Sample	Abundance: F1: 128, Sample	Abundance: F1: 129, Sample	Abundance: F1: 130, Sample	Abundance: F1: 131, Sample	Charge (by Search Engine): Sequest HT	DeltaM [ppm] (by Search Engine): Sequest HT	RT [min] (by Search Engine): Sequest HT
							[R].TDSSEVVQAGEK.[L]	1xTMT6plex [K12]; 1xTMT6plex [N-Term]	1	1	2	Q8VDF2	Q8VDF2 [370-381]		0	1707.92							3	3.37	42.5374
	142.4	87.5	80.2	123.9	77.6	88.3	[K].ALEQGPSSSK.[T]	1xTMT6plex [K10]; 1xTMT6plex [N-Term]	1	1	1	Q8VDF2	Q8VDF2 [632-641]		0	1461.83	17	10.9	9.3	13.6	8.6	9.4	2	-0.45	39.2535
142.4	141.3	140.8	59	56.1	60.5	Q9QYI7	DnaJ homolog subfamily B member 8 OS=Mus musculus OX=10090 GN=Dnajb8 PE=2 SV=1	43	8	9	3	227	25.2	8.85	669.8	693.8	643.2	255.2	244.8	253.5
	Abundances (Grouped): F1, 126	Abundances (Grouped): F1, 127	Abundances (Grouped): F1, 128	Abundances (Grouped): F1, 129	Abundances (Grouped): F1, 130	Abundances (Grouped): F1, 131	Annotated Sequence	Modifications	# Protein Groups	# Proteins	# PSMs	Master Protein Accessions	Positions in Master Proteins	Modifications in Master Proteins	# Missed Cleavages	Theo. MH+ [Da]	Abundance: F1: 126, Sample	Abundance: F1: 127, Sample	Abundance: F1: 128, Sample	Abundance: F1: 129, Sample	Abundance: F1: 130, Sample	Abundance: F1: 131, Sample	Charge (by Search Engine): Sequest HT	DeltaM [ppm] (by Search Engine): Sequest HT	RT [min] (by Search Engine): Sequest HT
	127.8	130.8	132.4	70.4	67.6	71	[-].MANYYEVLGVQSSASPEDIKK.[A]	2xTMT6plex [K20; K21]; 1xTMT6plex [N-Term]; 1xMet-loss [N-Term]	1	1	2	Q9QYI7	Q9QYI7 [1-21]	Q9QYI7 1xMet-loss [N-Term]	1	2885.59	295.6	315.9	297.3	149.8	145.2	146.3	3	-2.11	57.7041
	150	146.7	153.8	50.8	44.2	54.4	[K].SVMSSTEMVNGRK.[V]	1xTMT6plex [K13]; 1xTMT6plex [N-Term]	2	2	1	Q9QYI7; A0A0N4SVT8	Q9QYI7 [177-189]; A0A0N4SVT8 [44-56]		1	1884.01	142.9	145.9	142.3	44.5	39.1	46.2	3	-3.59	44.8621
	187.6	146.6	165.6	34	35.5	30.7	[K].SVMSSTEMVNGR.[K]	1xTMT6plex [N-Term]	2	2	1	Q9QYI7; A0A0N4SVT8	Q9QYI7 [177-188]; A0A0N4SVT8 [44-55]		0	1526.75	33.6	27.4	28.8	5.6	5.9	4.9	2	-0.15	45.9519
	183.3	131.1	182.9	21	46.3	35.4	[K].QVSEAYEVLSDSK.[K]	1xTMT6plex [K13]; 1xTMT6plex [N-Term]	1	1	1	Q9QYI7	Q9QYI7 [48-60]		0	1913.03	25.6	19.1	24.8	2.7	6	4.4	3	-3.35	57.9325
	171.1	171.5	151	43.4	32.2	30.8	[R].WHPDKNPDNKEEAEK.[K]	3xTMT6plex [K5; K10; K15]; 1xTMT6plex [N-Term]	1	1	1	Q9QYI7	Q9QYI7 [30-44]		2	2753.5	34.3	35.9	29.4	8	6	5.5	5	-4.25	42.4285
							[R].STFSSASFGGSGSSGFK.[S]	1xTMT6plex [K17]; 1xTMT6plex [N-Term]	2	2	1	Q9QYI7; A0A0N4SVT8	Q9QYI7 [160-176]; A0A0N4SVT8 [27-43]		0	2056.04							3	-3.12	55.3773
	145.8	151.4	134.3	55.2	54	59.3	[R].VEVEEDGQLR.[SK]	1xTMT6plex [N-Term]	2	2	1	Q9QYI7; A0A0N4SVT8	Q9QYI7 [203-212]; A0A0N4SVT8 [70-79]		0	1402.74	115.2	124.9	103.1	40.1	39.6	41.8	2	-2.58	45.2249
	175.3	183.6	139.8	38	25.1	38.3	[R].IIENGQER.[V]	1xTMT6plex [N-Term]	2	2	1	Q9QYI7; A0A0N4SVT8	Q9QYI7 [195-202]; A0A0N4SVT8 [62-69]		0	1187.66	22.6	24.7	17.5	4.5	3	4.4	2	-0.77	37.525
142.2	150.4	137.8	58.6	55.3	55.7	P47915	60S ribosomal protein L29 OS=Mus musculus OX=10090 GN=Rpl29 PE=1 SV=2	33	7	11	7	160	17.6	11.84	1125.6	1243.1	1059.3	426.3	406	393.3
	Abundances (Grouped): F1, 126	Abundances (Grouped): F1, 127	Abundances (Grouped): F1, 128	Abundances (Grouped): F1, 129	Abundances (Grouped): F1, 130	Abundances (Grouped): F1, 131	Annotated Sequence	Modifications	# Protein Groups	# Proteins	# PSMs	Master Protein Accessions	Positions in Master Proteins	Modifications in Master Proteins	# Missed Cleavages	Theo. MH+ [Da]	Abundance: F1: 126, Sample	Abundance: F1: 127, Sample	Abundance: F1: 128, Sample	Abundance: F1: 129, Sample	Abundance: F1: 130, Sample	Abundance: F1: 131, Sample	Charge (by Search Engine): Sequest HT	DeltaM [ppm] (by Search Engine): Sequest HT	RT [min] (by Search Engine): Sequest HT
	142.3	142.4	141.7	62.3	58.2	53.1	[K].ALVKPQAIKPK.[M]	3xTMT6plex [K4; K9; K11]; 1xTMT6plex [N-Term]	1	4	2	P47915	P47915 [74-84]		0	2109.43	324.5	339	313.9	130.6	123.2	108	4	-1.33	47.6927
	127.8	138	121.9	71.6	63	77.7	[K].RLAFIAHPK.[L]	1xTMT6plex [K9]; 1xTMT6plex [N-Term]	1	4	2	P47915	P47915 [93-101]		1	1510.96	89.7	101.1	83.1	46.2	41	48.6	4	-0.86	44.9159
							[K].AQASAPAQAPK.[G]	1xTMT6plex [K11]; 1xTMT6plex [N-Term]	1	1	3	P47915	P47915 [135-145]		0	1497.88							2	2.47	35.3632
	152	148.9	137.8	52.8	56.1	52.3	[R].SQRYESLK.[G]	1xTMT6plex [K8]; 1xTMT6plex [N-Term]	1	4	1	P47915	P47915 [26-33]		1	1468.85	197	201.4	173.4	62.9	67.5	60.4	3	-3.61	39.2348
	153.5	164.2	148.9	45.3	43.6	44.6	[R].SQRYESLKGVDPK.[F]	2xTMT6plex [K8; K13]; 1xTMT6plex [N-Term]	1	4	1	P47915	P47915 [26-38]		2	2194.28	235.7	263.2	222	64	62.2	61	4	-6.1	44.2378
	145.4	137.5	128.6	65.6	61.8	61.2	[K].GAQAPVKAP.[-]	1xTMT6plex [K7]; 1xTMT6plex [N-Term]	1	2	1	P47915	P47915 [152-160]		1	1296.8	77.3	76.3	66.4	32.1	30.5	29	2	1.05	40.1275
	128.3	159.9	131.5	62.7	56	61.7	[R].LAFIAHPK.[L]	1xTMT6plex [K8]; 1xTMT6plex [N-Term]	1	4	1	P47915	P47915 [94-101]		0	1354.86	201.4	262.1	200.5	90.5	81.6	86.3	3	-2.11	52.2922
142.1	112.1	111	81.2	73.7	80	O55060	Thiopurine S-methyltransferase OS=Mus musculus OX=10090 GN=Tpmt PE=1 SV=1	18	3	3	3	240	27.6	6.44	33.9	27.9	25.7	17.8	16.3	17
	Abundances (Grouped): F1, 126	Abundances (Grouped): F1, 127	Abundances (Grouped): F1, 128	Abundances (Grouped): F1, 129	Abundances (Grouped): F1, 130	Abundances (Grouped): F1, 131	Annotated Sequence	Modifications	# Protein Groups	# Proteins	# PSMs	Master Protein Accessions	Positions in Master Proteins	Modifications in Master Proteins	# Missed Cleavages	Theo. MH+ [Da]	Abundance: F1: 126, Sample	Abundance: F1: 127, Sample	Abundance: F1: 128, Sample	Abundance: F1: 129, Sample	Abundance: F1: 130, Sample	Abundance: F1: 131, Sample	Charge (by Search Engine): Sequest HT	DeltaM [ppm] (by Search Engine): Sequest HT	RT [min] (by Search Engine): Sequest HT
							[R].GHTVVGVEISEIGIR.[E]	1xTMT6plex [N-Term]	1	6	1	O55060	O55060 [78-92]		0	1795.03							3	1.01	56.5485
	142.1	112.1	111	81.2	73.7	80	[K].CSMQCLEEVDALEER.[H]	2xCarbamidomethyl [C1; C5]; 1xTMT6plex [N-Term]	1	2	1	O55060	O55060 [207-221]		0	2097.95	33.9	27.9	25.7	17.8	16.3	17	2	-1.16	58.2327
							[R].GALVAINPGDHDR.[Y]	1xTMT6plex [N-Term]	1	5	1	O55060	O55060 [148-160]		0	1563.84							3	-3.4	45.0921
142.1	141.3	140.3	59.4	58.5	58.4	P09041	Phosphoglycerate kinase 2 OS=Mus musculus OX=10090 GN=Pgk2 PE=1 SV=4	83	37	111	30	417	44.8	6.8	18278.5	18969.5	17532	7029.8	6986.4	6702
	Abundances (Grouped): F1, 126	Abundances (Grouped): F1, 127	Abundances (Grouped): F1, 128	Abundances (Grouped): F1, 129	Abundances (Grouped): F1, 130	Abundances (Grouped): F1, 131	Annotated Sequence	Modifications	# Protein Groups	# Proteins	# PSMs	Master Protein Accessions	Positions in Master Proteins	Modifications in Master Proteins	# Missed Cleavages	Theo. MH+ [Da]	Abundance: F1: 126, Sample	Abundance: F1: 127, Sample	Abundance: F1: 128, Sample	Abundance: F1: 129, Sample	Abundance: F1: 130, Sample	Abundance: F1: 131, Sample	Charge (by Search Engine): Sequest HT	DeltaM [ppm] (by Search Engine): Sequest HT	RT [min] (by Search Engine): Sequest HT
	143.2	145.8	141.9	58.9	55.5	54.7	[K].IVFPVDFVTGDKFDENAK.[V]	2xTMT6plex [K12; K18]; 1xTMT6plex [N-Term]	1	1	10	P09041	P09041 [280-297]		1	2728.52	1170.7	1243.6	1126.3	442.5	420.9	398.6	3	-2.95	58.8797
	135.3	142.8	141.3	58.1	60.1	62.3	[K].SVVLMSHLGRPDGIPMPDKYSLEPVADELK.[S]	2xTMT6plex [K19; K30]; 1xTMT6plex [N-Term]	1	1	1	P09041	P09041 [57-86]		1	3981.18	441.3	486.1	447.5	174.2	181.8	181.1	5	-2.1	58.4064
	114.9	112.7	118	85.8	84	84.6	[K].SVVLMSHLGRPDGIPMPDK.[Y]	1xTMT6plex [K19]; 1xTMT6plex [N-Term]	1	1	1	P09041	P09041 [57-75]		0	2507.39	296.5	303.6	295.5	203.6	201	194.6	4	-4.06	56.7559
	148.1	150.3	150.1	52.3	51.6	47.6	[K].ISADPAKVEAFQASLSK.[L]	2xTMT6plex [K7; K17]; 1xTMT6plex [N-Term]	1	1	1	P09041	P09041 [140-156]		1	2449.43	1258.7	1333.3	1238.2	408.6	407	360.9	3	-6.03	58.2973
	138.2	135.9	138.5	61.7	61.4	64.3	[K].NMQIGASLFDEEGATIVK.[E]	1xTMT6plex [K18]; 1xTMT6plex [N-Term]	1	1	1	P09041	P09041 [250-267]		0	2381.28	344.7	353.9	335.5	141.6	142.2	143.1	3	-0.35	58.6904
	166	169.7	170.3	31	31.6	31.4	[K].NMQIGASLFDEEGATIVKEIMEK.[A]	2xTMT6plex [K18; K23]; 1xTMT6plex [N-Term]	1	1	1	P09041	P09041 [250-272]		1	3240.75	379.3	404.8	377.8	65.2	67.1	64	3	-0.35	59.4087
	163.6	159.3	155.6	42.2	40.1	39.1	[R].FHVEEEGKGK.[D]	2xTMT6plex [K8; K10]; 1xTMT6plex [N-Term]	2	3	3	P09041; P09411	P09041 [124-133]; P09411 [124-133]		1	1847.06	894.7	909.3	826.4	212.4	203.7	190.6	3	-5.4	42.3058
	126	128.9	132.4	66.1	79.2	67.4	[K].VSHVSTGGGASLELLEGK.[IV]	1xTMT6plex [K18]; 1xTMT6plex [N-Term]	2	2	2	P09041; P09411	P09041 [389-406]; P09411 [389-406]		0	2199.24	269.5	287.6	275	130.1	157.1	128.4	3	-1.56	55.7772
	129.5	136.3	134.8	62.4	68.8	68.1	[K].VGQATIESGIPSGWMGLDCGPESIK.[I]	1xCarbamidomethyl [C19]; 1xTMT6plex [K25]; 1xTMT6plex [N-Term]	1	1	1	P09041	P09041 [298-322]		0	3047.56	103.2	113.4	104.3	45.7	50.9	48.4	4	-1.06	58.7421
	137.9	141	139.4	60	61.1	60.6	[K].LIVWNGPIGVFEWDAFAK.[G]	1xTMT6plex [K18]; 1xTMT6plex [N-Term]	1	1	8	P09041	P09041 [333-350]		0	2520.41	534.3	570.5	524.6	213.7	219.9	209.4	3	0.03	59.6414
	143.6	135	149.4	62.5	52.2	57.4	[K].ATSNGCVTIIGGGDTATCCAK.[W]	3xCarbamidomethyl [C6; C18; C19]; 1xTMT6plex [K21]; 1xTMT6plex [N-Term]	1	1	4	P09041	P09041 [362-382]		0	2572.26	68.5	67.2	69.2	27.4	23.1	24.4	3	-3.29	50.8067
	127.9	139.8	130.7	66.7	65.5	69.4	[K].LGDVYVNDAFGTAHR.[A]	1xTMT6plex [N-Term]	2	3	13	P09041; P09411	P09041 [157-171]; P09411 [157-171]		0	1863.96	182.4	208	180.9	87.5	86.6	88.2	2	-2.64	56.6308
	107.9	125.1	119.5	80.5	86.5	80.5	[R].AHSSTVGVNLPQK.[A]	1xTMT6plex [K13]; 1xTMT6plex [N-Term]	1	1	5	P09041	P09041 [172-184]		0	1796.04	170.6	206.5	183.5	117.1	126.9	113.5	3	-3.7	44.6318
	142.2	140.3	139.1	60.1	58.8	59.5	[K].ALEKPERPFLAILGGAK.[V]	2xTMT6plex [K4; K17]; 1xTMT6plex [N-Term]	1	1	2	P09041	P09041 [200-216]		0	2497.55	2332.7	2402.3	2216.1	906.4	894.3	870.2	4	-7.69	58.4113
	139.2	139.1	133.2	66.1	62.8	59.6	[K].KISADPAKVEAFQASLSK.[L]	3xTMT6plex [K1; K8; K18]; 1xTMT6plex [N-Term]	1	1	1	P09041	P09041 [139-156]		2	2806.68	488.5	509.3	453.7	213.3	204.6	186.3	4	-3.9	56.5507
	165.4	169.3	167.9	33.1	32.5	31.7	[K].SLLNKDVIFLK.[D]	2xTMT6plex [K5; K11]; 1xTMT6plex [N-Term]	1	1	1	P09041	P09041 [87-97]		1	1977.27	627.2	670.1	618	115.3	114.5	107.2	3	-6.64	58.5832
	137.5	129	127.6	69.2	66.7	70	[K].INAQIVAQAK.[L]	1xTMT6plex [K10]; 1xTMT6plex [N-Term]	1	1	2	P09041	P09041 [323-332]		0	1513.95	771.5	755.9	695.5	357.4	347.1	350	2	-7.47	51.1016
	127.7	127.1	125.8	73.1	73.7	72.5	[R].FHVEEEGK.[G]	1xTMT6plex [K8]; 1xTMT6plex [N-Term]	2	3	10	P09041; P09411	P09041 [124-131]; P09411 [124-131]		0	1432.78	251.1	260.8	240.1	132.2	134.5	127.1	3	-3.18	43.8773
	122.2	132.2	131.8	64	76.6	73.2	[K].YSLEPVADELK.[S]	1xTMT6plex [K11]; 1xTMT6plex [N-Term]	1	1	1	P09041	P09041 [76-86]		0	1721.97	62.7	70.8	65.7	30.2	36.5	33.5	3	-1.65	58.4028
	141.6	135.3	139.3	62.4	61.2	60.2	[K].ALMDEVVK.[A]	1xTMT6plex [K8]; 1xTMT6plex [N-Term]	1	1	5	P09041	P09041 [354-361]		0	1362.81	842.8	840.6	805	341.8	337.8	319.1	2	-2.66	52.4536
	129.9	146.1	141.4	56.4	60	66.2	[K].ILPGVEALSNM.[-]	1xOxidation [M11]; 1xTMT6plex [N-Term]	1	1	1	P09041	P09041 [407-417]		0	1388.77	47.1	55.3	49.8	18.8	20.2	21.4	2	-2.08	58.8848
	154.6	165.7	152.5	43.4	42.5	41.3	[R].FHVEEEGKGKDSSGK.[K]	3xTMT6plex [K8; K10; K15]; 1xTMT6plex [N-Term]	1	1	2	P09041	P09041 [124-138]		2	2550.43	125.4	140.3	120.1	32.4	32	29.9	5	-1.43	41.5133
	154.3	142.9	146	53.4	51.8	51.6	[K].LTLDKVDLK.[G]	2xTMT6plex [K5; K9]; 1xTMT6plex [N-Term]	1	1	2	P09041	P09041 [7-15]		1	1732.12	782.4	755.9	718.5	249.1	243.7	233	3	-3.83	56.1214
	164.4	166.6	173.6	31.3	31.2	33	[K].NNQITNNQR.[I]	1xTMT6plex [N-Term]	2	3	2	P09041; P09411	P09041 [31-39]; P09411 [31-39]		0	1330.7	339.6	359.1	348.1	59.5	59.8	60.7	2	2.53	25.6904
	120.1	111.5	119.2	80.4	89.1	79.8	[K].ILPGVEALSNM.[-]	1xTMT6plex [N-Term]	1	1	5	P09041	P09041 [407-417]		0	1372.77	93.5	90.6	90.1	57.6	64.4	55.4	2	-0.79	59.3409
	149.2	131.6	135.5	61.8	57.6	64.3	[K].ELDYFSK.[A]	1xTMT6plex [K7]; 1xTMT6plex [N-Term]	1	1	3	P09041	P09041 [193-199]		0	1359.76	202.6	186.4	178.6	77.2	72.5	77.8	2	-0.19	57.1337
	133.2	133.6	130.4	67.3	67.7	67.9	[K].DKIQLIK.[NS]	2xTMT6plex [K2; K7]; 1xTMT6plex [N-Term]	2	2	2	P09041; A0A1D5RLM8	P09041 [219-225]; A0A1D5RLM8 [2119-2125]		1	1545.03	322.7	337.9	306.9	150	152.2	146.6	3	-5.34	50.4007
	122.7	118.2	127.9	77.5	77.8	75.9	[K].ASGFLMK.[K]	1xTMT6plex [K7]; 1xTMT6plex [N-Term]	1	1	2	P09041	P09041 [185-191]		0	1211.72	526.7	529.5	533.1	305.8	309.9	290.5	2	-1.51	55.4762
							[K].VKDKIQLIK.[N]	3xTMT6plex [K2; K4; K9]; 1xTMT6plex [N-Term]	1	1	1	P09041	P09041 [217-225]		2	2001.36							4	-5.95	51.704
	150.7	146.2	140.2	54.5	52.7	55.8	[K].ASGFLMKK.[E]	2xTMT6plex [K7; K8]; 1xTMT6plex [N-Term]	1	1	2	P09041	P09041 [185-192]		1	1568.98	815.2	825.5	736.3	271.4	264.4	269	3	-2.57	52.1555
	142.9	146	143.5	58.3	54.9	54.4	[K].ALMDEVVK.[A]	1xOxidation [M3]; 1xTMT6plex [K8]; 1xTMT6plex [N-Term]	1	1	3	P09041	P09041 [354-361]		0	1378.8	692.3	738	675.2	259.7	246.8	234.9	2	-1.61	48.6863
	142.5	145	135	59.2	59.4	58.9	[R].VDFNVPMK.[N]	1xTMT6plex [K8]; 1xTMT6plex [N-Term]	2	3	4	P09041; P09411	P09041 [23-30]; P09411 [23-30]		0	1407.81	1341.8	1424.7	1233.8	512.2	518.9	494.2	2	-1.69	58.1755
							[K].EIMEKAEK.[N]	2xTMT6plex [K5; K8]; 1xTMT6plex [N-Term]	1	1	1	P09041	P09041 [268-275]		1	1664.99							3	-3.14	46.4988
	147.5	138.4	148	55.2	56.4	54.5	[K].KELDYFSK.[A]	2xTMT6plex [K1; K8]; 1xTMT6plex [N-Term]	1	1	1	P09041	P09041 [192-199]		1	1717.01	281.8	276.1	274.6	97	100	92.9	3	-6.21	53.6253
	136.1	151.6	152.8	53.8	53.3	52.3	[K].NMQIGASLFDEEGATIVKEIMEK.[A]	1xOxidation [M2]; 2xTMT6plex [K18; K23]; 1xTMT6plex [N-Term]	1	1	1	P09041	P09041 [250-272]		1	3256.74	28.9	33.6	31.5	10.5	10.5	9.9	3	-1.12	59.2306
	151.1	148.6	147	51.1	52.1	50	[K].AAIPSIK.[H]	1xTMT6plex [K7]; 1xTMT6plex [N-Term]	1	1	1	P09041	P09041 [42-48]		0	1157.77	233.1	239.2	220.2	72.5	74.6	68.8	2	-4.7	49.683
	128.7	125.9	129.6	73.4	68.6	73.7	[R].VDFNVPMK.[N]	1xOxidation [M7]; 1xTMT6plex [K8]; 1xTMT6plex [N-Term]	2	3	2	P09041; P09411	P09041 [23-30]; P09411 [23-30]		0	1423.8	800.8	817.5	782.6	420	396.1	408.7	2	-4.92	54.3276
	123.2	123.1	123.6	76.6	73.1	80.5	[K].VEAFQASLSK.[L]	1xTMT6plex [K10]; 1xTMT6plex [N-Term]	1	1	1	P09041	P09041 [147-156]		0	1537.9	18.9	19.7	18.4	10.8	10.4	11	2	-1.19	56.5499
	136.3	135.3	143.9	63.3	56.5	64.6	[K].WGTEDK.[V]	1xTMT6plex [K6]; 1xTMT6plex [N-Term]	1	1	1	P09041	P09041 [383-388]		0	1193.66	82.6	85.6	84.7	35.3	31.8	34.9	2	0.28	46.2312
							[K].HCLDNGAK.[S]	1xCarbamidomethyl [C2]; 1xTMT6plex [K8]; 1xTMT6plex [N-Term]	1	1	1	P09041	P09041 [49-56]		0	1372.74							3	-2.47	31.5357
	133.9	140.1	133.9	66.4	57.2	68.5	[K].ISADPAK.[V]	1xTMT6plex [K7]; 1xTMT6plex [N-Term]	1	1	1	P09041	P09041 [140-146]		0	1159.71	52.2	57	50.7	23.8	20.7	23.8	2	-2.65	41.5627
141.9	143.2	141.1	58.8	57.4	57.7	Q91W10	Metal cation symporter ZIP8 OS=Mus musculus OX=10090 GN=Slc39a8 PE=1 SV=1	3	2	2	2	462	50.1	5.86	501.5	528	484	191	188.3	181.6
	Abundances (Grouped): F1, 126	Abundances (Grouped): F1, 127	Abundances (Grouped): F1, 128	Abundances (Grouped): F1, 129	Abundances (Grouped): F1, 130	Abundances (Grouped): F1, 131	Annotated Sequence	Modifications	# Protein Groups	# Proteins	# PSMs	Master Protein Accessions	Positions in Master Proteins	Modifications in Master Proteins	# Missed Cleavages	Theo. MH+ [Da]	Abundance: F1: 126, Sample	Abundance: F1: 127, Sample	Abundance: F1: 128, Sample	Abundance: F1: 129, Sample	Abundance: F1: 130, Sample	Abundance: F1: 131, Sample	Charge (by Search Engine): Sequest HT	DeltaM [ppm] (by Search Engine): Sequest HT	RT [min] (by Search Engine): Sequest HT
	95.5	89.8	99	106.1	104.6	105.1	[R].SLSAAQLGR.[L]	1xTMT6plex [N-Term]	1	1	1	Q91W10	Q91W10 [42-50]		0	1131.67	51.6	50.6	51.9	52.7	52.4	50.6	2	1.79	43.8963
	150.3	152.8	148.7	50.2	48.9	49.1	[K].IDNYVEK.[A]	1xTMT6plex [K7]; 1xTMT6plex [N-Term]	1	1	1	Q91W10	Q91W10 [192-198]		0	1338.77	449.9	477.4	432.1	138.3	135.9	131	2	0.7	51.2514
141.9	142.2	141.7	58.9	57.9	57.4	P06745	Glucose-6-phosphate isomerase OS=Mus musculus OX=10090 GN=Gpi PE=1 SV=4	51	29	58	29	558	62.7	8.13	9751.4	10195.2	9454.9	3722.9	3694.1	3513.9
	Abundances (Grouped): F1, 126	Abundances (Grouped): F1, 127	Abundances (Grouped): F1, 128	Abundances (Grouped): F1, 129	Abundances (Grouped): F1, 130	Abundances (Grouped): F1, 131	Annotated Sequence	Modifications	# Protein Groups	# Proteins	# PSMs	Master Protein Accessions	Positions in Master Proteins	Modifications in Master Proteins	# Missed Cleavages	Theo. MH+ [Da]	Abundance: F1: 126, Sample	Abundance: F1: 127, Sample	Abundance: F1: 128, Sample	Abundance: F1: 129, Sample	Abundance: F1: 130, Sample	Abundance: F1: 131, Sample	Charge (by Search Engine): Sequest HT	DeltaM [ppm] (by Search Engine): Sequest HT	RT [min] (by Search Engine): Sequest HT
	162.7	153.2	156.9	43.8	40.3	43.1	[R].GVEAARDNMFSGSK.[I]	1xTMT6plex [K14]; 1xTMT6plex [N-Term]	1	2	1	P06745	P06745 [76-89]		1	1927.01	230.7	226.8	216.1	57.1	53.1	54.5	3	-2.1	47.7816
	167.4	171.5	170	30	30.8	30.2	[K].TFTTQETITNAETAKEWFLEAAKDPSAVAK.[H]	3xTMT6plex [K15; K23; K30]; 1xTMT6plex [N-Term]	1	1	1	P06745	P06745 [212-241]		2	4215.3	1281.4	1370.3	1263.6	211.5	218.9	205.7	4	-2.29	58.9102
	134.9	135.9	140.8	56.4	59.5	72.5	[K].TFTTQETITNAETAK.[E]	1xTMT6plex [K15]; 1xTMT6plex [N-Term]	1	1	2	P06745	P06745 [212-226]		0	2114.14	106.3	111.8	107.7	40.9	43.5	50.9	3	-0.94	53.3179
	141.7	138.7	139.6	63.2	61.2	55.6	[K].LRELFEADPER.[F]	1xTMT6plex [N-Term]	1	3	3	P06745	P06745 [26-36]		1	1603.86	247.4	252.7	236.6	101.5	99.1	86.6	3	0.09	56.2591
	134	140.7	139.4	59.7	63.9	62.4	[R].SNTPIKVDGKDVMPEVNR.[V]	2xTMT6plex [K6; K10]; 1xTMT6plex [N-Term]	1	1	3	P06745	P06745 [107-124]		2	2686.52	638	699.1	644.5	261.3	282.1	264.8	4	-2.96	50.453
	136	128.3	127.4	75.5	65.6	67.2	[K].SITDIINIGIGGSDLGPLMVTEALKPYSK.[G]	2xTMT6plex [K25; K29]; 1xTMT6plex [N-Term]	1	1	2	P06745	P06745 [148-176]		0	3690.1	209.7	206.5	190.8	107.1	93.9	92.4	4	-3.54	59.4367
	174.6	172.9	166	27.7	31	27.6	[K].SRGVEAARDNMFSGSK.[I]	1xTMT6plex [K16]; 1xTMT6plex [N-Term]	1	2	1	P06745	P06745 [74-89]		2	2170.14	100.6	104	92.9	14.7	16.6	14.2	4	-2.48	43.3502
	145.6	144.8	142.5	56.1	56.1	54.8	[K].EWFLEAAKDPSAVAK.[H]	2xTMT6plex [K8; K15]; 1xTMT6plex [N-Term]	1	1	1	P06745	P06745 [227-241]		1	2349.34	1586.2	1647.4	1508.1	562.6	567	532.7	3	-2.59	58.4549
	147.2	140.6	146.9	57.7	53.8	53.8	[R].FAAYFQQGDMESNGK.[Y]	1xTMT6plex [K15]; 1xTMT6plex [N-Term]	1	1	1	P06745	P06745 [348-362]		0	2151.06	613	611.3	594.1	220.8	207.8	199.6	2	-3.65	58.4053
	133.3	141.3	139.4	66	59.5	60.6	[K].EVMQMLVELAK.[S]	1xTMT6plex [K11]; 1xTMT6plex [N-Term]	1	3	1	P06745	P06745 [63-73]		0	1749.01	82.6	91.4	83.9	37.6	34.2	33.5	2	0.89	59.3199
	147.9	154.2	131.2	60.2	51.4	55.1	[K].ELQAAGKSPEDLEK.[L]	2xTMT6plex [K7; K14]; 1xTMT6plex [N-Term]	1	3	1	P06745	P06745 [448-461]		1	2202.26	69.2	75.3	59.6	25.9	22.3	23	3	-2.91	49.4763
	135	135.8	132.1	68.2	65	63.9	[K].VFEGNRPTNSIVFTK.[L]	1xTMT6plex [K15]; 1xTMT6plex [N-Term]	1	2	1	P06745	P06745 [467-481]		0	2167.23	516.8	542.5	491.2	240.2	230.8	218.2	3	-5.61	54.7899
							[K].IFVQGIMWDINSFDQWGVELGK.[Q]	1xTMT6plex [K22]; 1xTMT6plex [N-Term]	1	2	4	P06745	P06745 [498-519]		0	3040.6							3	-3.84	59.9974
	139.7	151.7	126.8	58.8	65.3	57.7	[R].VDHQTGPIVWGEPGTNGQHAFYQLIHQGTK.[M]	1xTMT6plex [K30]; 1xTMT6plex [N-Term]	1	1	1	P06745	P06745 [371-400]		0	3773.96	120.3	136.4	106	46.6	52.2	44.3	5	-2.33	58.1995
	132.5	136.5	128	71.6	67.4	64	[K].TLASLSPETSLFIIASK.[T]	1xTMT6plex [K17]; 1xTMT6plex [N-Term]	1	1	1	P06745	P06745 [195-211]		0	2236.32	332.4	357.4	311.7	165.1	157	143.1	2	-6.99	59.1358
							[K].MIPCDFLIPVQTQHPIRK.[G]	1xCarbamidomethyl [C4]; 1xOxidation [M1]; 1xTMT6plex [K18]; 1xTMT6plex [N-Term]	1	3	1	P06745	P06745 [401-418]		1	2667.49							4	-2.38	56.9546
	147.2	149.4	147.1	50.8	54.5	51	[K].HFVALSTNTAK.[V]	1xTMT6plex [K11]; 1xTMT6plex [N-Term]	1	1	2	P06745	P06745 [242-252]		0	1646.96	367.1	388.8	356	116.6	126	113.3	3	-4.21	45.1947
	128.6	133.9	135.8	69.2	69.2	63.2	[K].DVMPEVNRVLDK.[M]	1xTMT6plex [K12]; 1xTMT6plex [N-Term]	1	1	1	P06745	P06745 [117-128]		1	1873.06	138.7	150.8	142.2	68.7	69.3	60.8	3	-1.72	57.931
	136.9	134.6	140.8	67.3	58.9	61.5	[K].VDGKDVMPEVNR.[V]	1xTMT6plex [K4]; 1xTMT6plex [N-Term]	1	1	2	P06745	P06745 [113-124]		1	1817	175.4	179.9	175.1	79.3	70	70.2	3	-0.69	48.3139
	122.7	116.4	119.8	82	77.4	81.7	[R].FAAYFQQGDMESNGK.[Y]	1xOxidation [M10]; 1xTMT6plex [K15]; 1xTMT6plex [N-Term]	1	1	3	P06745	P06745 [348-362]		0	2167.05	698.3	691.4	661.9	428.9	408.6	414.1	2	3.7	57.9635
	135.9	136.6	144.5	59.7	62.3	61.1	[R].DNMFSGSK.[I]	1xTMT6plex [K8]; 1xTMT6plex [N-Term]	1	2	2	P06745	P06745 [82-89]		0	1343.7	170	178.4	175.5	68.7	72.3	68.1	2	-1.94	48.7496
	148.3	134.7	142.3	53.1	62.3	59.3	[K].DVMPEVNR.[V]	1xTMT6plex [N-Term]	1	1	3	P06745	P06745 [117-124]		0	1188.62	241.9	229.4	225.4	79.7	94.3	86.3	2	0.32	44.5495
	143.2	145	145.1	54.5	58.4	53.9	[R].SNTPIKVDGK.[D]	2xTMT6plex [K6; K10]; 1xTMT6plex [N-Term]	1	1	1	P06745	P06745 [107-116]		1	1746.07	211.1	223.2	207.7	73.9	79.9	70.8	3	-3.28	42.5604
	157.4	154.7	149.7	52.3	45.9	39.9	[K].ELQAAGK.[S]	1xTMT6plex [K7]; 1xTMT6plex [N-Term]	1	3	1	P06745	P06745 [448-454]		0	1174.72	62.8	64.4	58	19.2	17	14.2	2	-1.01	40.1633
	126.5	130.1	138.9	71	64.8	68.7	[R].NRSNTPIKVDGK.[D]	2xTMT6plex [K8; K12]; 1xTMT6plex [N-Term]	1	1	1	P06745	P06745 [105-116]		2	2016.22	253	271.4	269.7	130.5	120.3	122.4	4	-5.09	37.2539
	133.6	132.6	135	65.7	66.9	66.2	[K].EWFLEAAK.[D]	1xTMT6plex [K8]; 1xTMT6plex [N-Term]	1	1	1	P06745	P06745 [227-234]		0	1451.83	494.6	512.6	485.3	223.6	230	218.6	2	-2.83	58.6657
	107.2	97.6	108.5	101.2	76.2	109.2	[R].AVLHVALR.[N]	1xTMT6plex [N-Term]	1	2	4	P06745	P06745 [97-104]		0	1107.72	40.2	38.2	39.5	34.9	26.5	36.5	3	-2.41	46.0852
	138.6	136	129.6	69.4	62.9	63.5	[R].SNTPIKVDGKDVMPEVNR.[V]	1xOxidation [M13]; 2xTMT6plex [K6; K10]; 1xTMT6plex [N-Term]	1	1	1	P06745	P06745 [107-124]		2	2702.51	129.4	132.5	117.5	59.6	54.5	52.8	4	-0.08	45.7181
							[R].ELFEADPER.[F]	1xTMT6plex [N-Term]	1	3	2	P06745	P06745 [28-36]		0	1334.68							2	-0.7	52.7244
	154.8	151.2	143.2	47	58.2	45.5	[K].LLEWHR.[A]	1xTMT6plex [N-Term]	1	3	2	P06745	P06745 [13-18]		0	1082.63	71.7	73.1	64.4	20	25	18.8	3	-3.76	51.5984
	139.4	149	143.3	57.8	56	54.4	[R].DNMFSGSK.[I]	1xOxidation [M3]; 1xTMT6plex [K8]; 1xTMT6plex [N-Term]	1	2	3	P06745	P06745 [82-89]		0	1359.7	500.8	558.7	499.9	191	186.5	174.3	2	-1.3	40.2361
	121.2	131.2	135	75.5	74.9	62.3	[K].VDGKDVMPEVNR.[V]	1xOxidation [M7]; 1xTMT6plex [K4]; 1xTMT6plex [N-Term]	1	1	2	P06745	P06745 [113-124]		1	1832.99	41.7	47.1	45.1	23.9	23.9	19.1	3	-0.35	41.7225
	116.6	124.5	148.8	72.5	71.9	65.7	[K].INYTENR.[A]	1xTMT6plex [N-Term]	1	2	1	P06745	P06745 [90-96]		0	1138.61	20.1	22.4	24.9	11.5	11.5	10.1	2	-2.02	39.4792
							[R].GVEAARDNMFSGSK.[I]	1xOxidation [M9]; 1xTMT6plex [K14]; 1xTMT6plex [N-Term]	1	2	1	P06745	P06745 [76-89]		1	1943.01							4	5.16	36.3608
141.8	140	147.7	59.5	50.6	60.4	D3YY23	LON peptidase N-terminal domain and RING finger protein 1 OS=Mus musculus OX=10090 GN=Lonrf1 PE=1 SV=2	1	1	1	1	762	85.1	7.62	45.6	47	46.1	17.6	15.1	17.3
	Abundances (Grouped): F1, 126	Abundances (Grouped): F1, 127	Abundances (Grouped): F1, 128	Abundances (Grouped): F1, 129	Abundances (Grouped): F1, 130	Abundances (Grouped): F1, 131	Annotated Sequence	Modifications	# Protein Groups	# Proteins	# PSMs	Master Protein Accessions	Positions in Master Proteins	Modifications in Master Proteins	# Missed Cleavages	Theo. MH+ [Da]	Abundance: F1: 126, Sample	Abundance: F1: 127, Sample	Abundance: F1: 128, Sample	Abundance: F1: 129, Sample	Abundance: F1: 130, Sample	Abundance: F1: 131, Sample	Charge (by Search Engine): Sequest HT	DeltaM [ppm] (by Search Engine): Sequest HT	RT [min] (by Search Engine): Sequest HT
	141.8	140	147.7	59.5	50.6	60.4	[-].MSSPAVAR.[A]	1xOxidation [M1]; 1xTMT6plex [N-Term]	1	1	1	D3YY23	D3YY23 [1-8]		0	1063.58	45.6	47	46.1	17.6	15.1	17.3	2	-1.53	36.1761
141.4	141	139.6	59.8	59	59.2	Q60662	A-kinase anchor protein 4 OS=Mus musculus OX=10090 GN=Akap4 PE=1 SV=1	61	51	99	51	849	93.7	6.92	14243.8	14821.4	13651.4	5544.3	5516.2	5318.8
	Abundances (Grouped): F1, 126	Abundances (Grouped): F1, 127	Abundances (Grouped): F1, 128	Abundances (Grouped): F1, 129	Abundances (Grouped): F1, 130	Abundances (Grouped): F1, 131	Annotated Sequence	Modifications	# Protein Groups	# Proteins	# PSMs	Master Protein Accessions	Positions in Master Proteins	Modifications in Master Proteins	# Missed Cleavages	Theo. MH+ [Da]	Abundance: F1: 126, Sample	Abundance: F1: 127, Sample	Abundance: F1: 128, Sample	Abundance: F1: 129, Sample	Abundance: F1: 130, Sample	Abundance: F1: 131, Sample	Charge (by Search Engine): Sequest HT	DeltaM [ppm] (by Search Engine): Sequest HT	RT [min] (by Search Engine): Sequest HT
							[R].EKISPSTDSLAK.[D]	2xTMT6plex [K2; K12]; 1xTMT6plex [N-Term]	1	1	1	Q60662	Q60662 [533-544]		1	1963.17							3	-2.09	45.8022
	135.4	130.6	133.5	67.1	66.6	66.9	[R].GVCKVDLYSPK.[G]	1xCarbamidomethyl [C3]; 2xTMT6plex [K4; K11]; 1xTMT6plex [N-Term]	1	1	1	Q60662	Q60662 [22-32]		1	1953.14	756.8	761.8	724.6	345	345.4	333.3	3	-4.58	50.3446
	132.5	138.1	133.7	67	63.8	64.9	[K].MDMSNMVLSLIQK.[L]	1xTMT6plex [K13]; 1xTMT6plex [N-Term]	1	1	1	Q60662	Q60662 [625-637]		0	1968.07	696	756.9	682	323.8	311.2	303.7	2	-3.9	59.2763
	150.3	153.8	138.7	52.4	51.8	52.9	[K].DTEKQDQSKTEGSVCLFK.[Q]	1xCarbamidomethyl [C15]; 3xTMT6plex [K4; K9; K18]; 1xTMT6plex [N-Term]	1	1	1	Q60662	Q60662 [84-101]		2	3016.64	150.3	160.6	134.7	48.2	48.1	47.2	4	-2.15	51.1774
	134.8	127.2	127.5	75.2	65.2	70.2	[K].SQSLAYATLK.[A]	1xTMT6plex [K10]; 1xTMT6plex [N-Term]	1	1	2	Q60662	Q60662 [442-451]		0	1539.91	1169.2	1151.5	1074.2	599.7	524.6	542.9	2	-3.19	53.5123
							[R].QLDEAVGNMAR.[K]	1xTMT6plex [N-Term]	1	1	2	Q60662	Q60662 [828-838]		0	1432.74							2	-2.56	49.2096
							[K].GKDPCEEECPGSSMGYMSQSAQYEK.[C]	2xCarbamidomethyl [C5; C9]; 1xOxidation [M]; 2xTMT6plex [K2; K25]; 1xTMT6plex [N-Term]	1	1	4	Q60662	Q60662 [564-588]		1	3558.61							4	-2.73	47.6912
	122.1	143.1	136.4	65.6	60.4	72.5	[K].QNAADIMEAMLK.[R]	1xOxidation [M]; 1xTMT6plex [K12]; 1xTMT6plex [N-Term]	1	1	3	Q60662	Q60662 [416-427]		0	1808.97	48.4	59.2	52.5	23.9	22.2	25.6	3	0.3	56.321
	160.3	160.4	160.8	40.9	40.5	37.1	[K].NQSLEFSAMKAEMK.[G]	2xTMT6plex [K10; K14]; 1xTMT6plex [N-Term]	1	1	1	Q60662	Q60662 [461-474]		1	2301.25	623.4	650.8	607.1	146.1	146.3	128.6	3	-2.96	57.0632
	142.7	149.1	144	54.6	58.5	51	[K].NTNNNQSPSNPATK.[S]	1xTMT6plex [K14]; 1xTMT6plex [N-Term]	1	1	3	Q60662	Q60662 [184-197]		0	1945.01	92.9	101.3	91	32.7	35.3	29.6	3	-1.07	33.1422
	139	131.1	147.6	59.8	61.7	60.8	[K].QAPSDPISVLNWLLNDLQK.[Y]	1xTMT6plex [K19]; 1xTMT6plex [N-Term]	1	1	1	Q60662	Q60662 [102-120]		0	2609.47	135.9	133.8	140.1	53.8	56	53	3	-0.95	59.9779
	131.2	122.1	125.7	68.1	79.9	73	[K].RPEEQCQDNAELDFISGMK.[Q]	1xCarbamidomethyl [C6]; 1xOxidation [M18]; 1xTMT6plex [K19]; 1xTMT6plex [N-Term]	1	1	6	Q60662	Q60662 [671-689]		0	2741.33	60.5	58.8	56.3	28.9	34.2	30	3	-2.51	55.1712
	142.1	143.4	145.6	53.4	60.5	55.1	[K].RPEEQCQDNAELDFISGMK.[Q]	1xCarbamidomethyl [C6]; 1xTMT6plex [K19]; 1xTMT6plex [N-Term]	1	1	1	Q60662	Q60662 [671-689]		0	2725.33	211.7	222.9	210.5	73.1	83.6	73.1	3	-2.26	58.3093
							[K].RLVSALLGEK.[K]	1xTMT6plex [K10]; 1xTMT6plex [N-Term]	1	1	2	Q60662	Q60662 [428-437]		1	1543.99							3	-0.47	58.2658
	115.5	146.3	124.7	68.2	86.2	59.2	[K].ERQLDEAVGNMAR.[K]	1xTMT6plex [N-Term]	1	1	1	Q60662	Q60662 [826-838]		1	1717.89	20.8	27.5	21.8	11.3	14.4	9.5	3	-3.87	47.722
	134.5	144	138.7	61.1	59.7	62	[K].ESLTMWNNQK.[Q]	1xTMT6plex [K10]; 1xTMT6plex [N-Term]	1	1	2	Q60662	Q60662 [503-512]		0	1708.91	565.8	632.1	566.5	236.5	233.2	232.5	2	-3.39	54.8906
	140.6	146.5	140.2	56.7	57.8	58.2	[K].GLMVYANQVASDMMVSVMK.[T]	1xTMT6plex [K19]; 1xTMT6plex [N-Term]	1	1	1	Q60662	Q60662 [331-349]		0	2532.31	656.7	714.4	636	243.4	250.6	242.5	3	-3.71	59.6265
	143.9	130	136.5	63.4	60.5	65.7	[K].LLSESPFSCDELTESDNK.[R]	1xCarbamidomethyl [C9]; 1xTMT6plex [K18]; 1xTMT6plex [N-Term]	1	1	1	Q60662	Q60662 [638-655]		0	2529.24	110	103.7	101.3	44.6	42.9	44.8	3	0.11	58.6297
	146.1	139.1	141.4	58.7	57.8	57	[K].VHSCGKPIPACVVLKR.[V]	2xCarbamidomethyl [C4; C11]; 2xTMT6plex [K6; K15]; 1xTMT6plex [N-Term]	1	1	3	Q60662	Q60662 [353-368]		1	2508.49	566	562.2	531.7	209	207.6	196.7	5	-1.93	46.5556
							[K].YSNNGAALAELEEQAALVGSGSR.[C]	1xTMT6plex [N-Term]	1	1	1	Q60662	Q60662 [713-735]		0	2536.28							3	0.22	58.6405
	126.7	136.4	130.9	73.1	64.1	68.9	[K].YALGFQHALSPSASSCK.[H]	1xCarbamidomethyl [C16]; 1xTMT6plex [K17]; 1xTMT6plex [N-Term]	1	1	1	Q60662	Q60662 [121-137]		0	2282.2	280.9	315.6	281.8	149	131.8	136.1	3	-6.71	53.504
	153.4	160.4	156.3	43.3	45.3	41.3	[K].CKNQSLEFSAMK.[A]	1xCarbamidomethyl [C1]; 2xTMT6plex [K2; K12]; 1xTMT6plex [N-Term]	1	1	1	Q60662	Q60662 [459-470]		1	2130.17	464.3	506.8	459.5	120.5	127.3	111.3	3	-5.56	50.2812
	148.4	152.5	147	52	48	52.1	[R].LSSLVIQMAR.[K]	1xTMT6plex [N-Term]	1	1	3	Q60662	Q60662 [224-233]		0	1346.8	432.5	464	416	139.5	129.8	135.4	2	-0.21	58.6809
	131.1	143.4	145.6	60.5	57.1	62.4	[R].QFIDQLVESVMK.[L]	1xTMT6plex [K12]; 1xTMT6plex [N-Term]	1	1	1	Q60662	Q60662 [694-705]		0	1895.07	34.4	39.3	37.1	14.6	13.9	14.6	2	0.7	59.5695
							[K].EIIVIKDTEKQDQSK.[T]	3xTMT6plex [K6; K10; K15]; 1xTMT6plex [N-Term]	1	1	1	Q60662	Q60662 [78-92]		2	2690.61							4	1.39	50.951
	158.2	146.8	134.3	52.9	53.6	54.1	[K].CLHHSMYTSGDK.[G]	1xCarbamidomethyl [C1]; 1xTMT6plex [K12]; 1xTMT6plex [N-Term]	1	1	2	Q60662	Q60662 [246-257]		0	1893.94	104	100.7	85.7	32	32.7	31.7	3	-4.12	36.242
	139.8	143.4	145.2	59	60.4	52.2	[K].HKVGDLEGDYSK.[I]	2xTMT6plex [K2; K12]; 1xTMT6plex [N-Term]	1	1	1	Q60662	Q60662 [138-149]		1	2035.14	83.8	89.7	84.5	32.5	33.6	27.9	4	-2.25	43.4316
	144.3	135.5	144.5	54.9	61.9	58.9	[K].NQSLEFSAMK.[A]	1xTMT6plex [K10]; 1xTMT6plex [N-Term]	1	1	1	Q60662	Q60662 [461-470]		0	1612.88	224.8	220.4	218.6	78.7	89.5	81.8	2	1.19	54.0644
	176.3	180.4	176.6	21.9	24.5	20.4	[R].GAPGPSTCMKENQLESQK.[M]	1xCarbamidomethyl [C8]; 2xTMT6plex [K10; K18]; 1xTMT6plex [N-Term]	1	1	2	Q60662	Q60662 [607-624]		1	2649.39	102.5	109.5	99.7	11.7	13.2	10.6	3	-1.95	46.4287
	144.2	146.3	142.4	55	60.2	52	[R].GAPGPSTCMK.[E]	1xCarbamidomethyl [C8]; 1xTMT6plex [K10]; 1xTMT6plex [N-Term]	1	1	2	Q60662	Q60662 [607-616]		0	1463.78	239.8	253.9	229.9	84.1	92.9	77.1	2	-0.52	40.2515
	154.6	171.3	136.8	35.3	49	53	[K].GKDPCEEECPGSSMGYMSQSAQYEK.[C]	2xCarbamidomethyl [C5; C9]; 2xTMT6plex [K2; K25]; 1xTMT6plex [N-Term]	1	1	1	Q60662	Q60662 [564-588]		1	3542.62	26.2	30.3	22.5	5.5	7.7	8	3	-4.09	51.9432
							[K].GKDPCEEECPGSSMGYMSQSAQYEK.[C]	2xCarbamidomethyl [C5; C9]; 2xOxidation [M14; M17]; 2xTMT6plex [K2; K25]; 1xTMT6plex [N-Term]	1	1	1	Q60662	Q60662 [564-588]		1	3574.6							4	-1.68	44.7647
	137.3	132.2	131.3	67.3	63.9	68.1	[R].RGVCKVDLYSPK.[G]	1xCarbamidomethyl [C4]; 2xTMT6plex [K5; K12]; 1xTMT6plex [N-Term]	1	1	1	Q60662	Q60662 [21-32]		2	2109.25	302.3	303.8	280.6	136.2	130.6	133.6	4	-4.61	45.526
	137.2	129.4	125.9	68.6	70.3	68.5	[K].EIIVIKDTEK.[Q]	2xTMT6plex [K6; K10]; 1xTMT6plex [N-Term]	1	1	1	Q60662	Q60662 [78-87]		1	1875.18	235.9	232.2	210.2	108.4	112.2	104.9	3	-0.2	53.3502
	157.1	154.6	152.8	44.7	48.7	42.1	[K].RLVSALLGEKK.[E]	2xTMT6plex [K10; K11]; 1xTMT6plex [N-Term]	1	1	1	Q60662	Q60662 [428-438]		2	1901.25	174	178.7	164.3	45.5	50.1	41.6	4	-1.86	56.0546
							[R].DAMMSQNYSETPGPEVIVNNQCSTTNLQK.[Q]	1xCarbamidomethyl [C22]; 1xOxidation [M4]; 1xTMT6plex [K29]; 1xTMT6plex [N-Term]	1	1	1	Q60662	Q60662 [739-767]		0	3730.78							4	-1.48	55.8241
							[K].QDQSKTEGSVCLFK.[Q]	1xCarbamidomethyl [C11]; 2xTMT6plex [K5; K14]; 1xTMT6plex [N-Term]	1	1	1	Q60662	Q60662 [88-101]		1	2314.27							3	-0.89	51.6263
							[R].SVATPEGECSMDDLSFYVNR.[L]	1xCarbamidomethyl [C9]; 1xOxidation [M11]; 1xTMT6plex [N-Term]	1	1	1	Q60662	Q60662 [204-223]		0	2522.14							3	1.11	57.3428
	150.6	148.2	150	56.5	46.6	48	[K].TFLYSEMCNK.[N]	1xCarbamidomethyl [C8]; 1xOxidation [M7]; 1xTMT6plex [K10]; 1xTMT6plex [N-Term]	1	1	2	Q60662	Q60662 [298-307]		0	1766.89	285.5	293.2	276	98.5	82	81.1	2	-2.75	52.8365
	134.4	132.4	135.3	65	66.7	66.2	[K].TFLYSEMCNK.[N]	1xCarbamidomethyl [C8]; 1xTMT6plex [K10]; 1xTMT6plex [N-Term]	1	1	2	Q60662	Q60662 [298-307]		0	1750.89	1124.9	1156.5	1099.5	500	517.7	493.5	2	-3.49	57.5941
	138	134.1	134.2	65.5	64.9	63.3	[K].TEGSVCLFK.[Q]	1xCarbamidomethyl [C6]; 1xTMT6plex [K9]; 1xTMT6plex [N-Term]	1	1	1	Q60662	Q60662 [93-101]		0	1498.83	670.1	679.8	633	292.7	292.4	274.2	2	-4.38	54.9181
	131.8	139.9	124.1	65.5	68.4	70.4	[K].EFADSISK.[G]	1xTMT6plex [K8]; 1xTMT6plex [N-Term]	1	1	3	Q60662	Q60662 [323-330]		0	1354.76	37.2	41.2	34	17	17.9	17.7	2	2.55	51.3591
	144.8	136.2	138.3	56.8	72.8	51.1	[K].VGDLEGDYSK.[I]	1xTMT6plex [K10]; 1xTMT6plex [N-Term]	1	1	2	Q60662	Q60662 [140-149]		0	1540.83	69.9	68.6	64.8	25.2	32.6	22	2	-1.4	52.1707
							[R].DAMMSQNYSETPGPEVIVNNQCSTTNLQK.[Q]	1xCarbamidomethyl [C22]; 2xOxidation [M3; M4]; 1xTMT6plex [K29]; 1xTMT6plex [N-Term]	1	1	2	Q60662	Q60662 [739-767]		0	3746.77							4	2.07	54.2397
	138	130.4	120.3	72	62.5	76.8	[R].QLDEAVGNMAR.[K]	1xOxidation [M9]; 1xTMT6plex [N-Term]	1	1	2	Q60662	Q60662 [828-838]		0	1448.74	50	49.3	42.3	24	21	24.8	2	0.11	40.5087
	144	138.1	139.1	52.5	60.4	65.8	[K].EIVSDLIDSCMK.[N]	1xCarbamidomethyl [C10]; 1xOxidation [M11]; 1xTMT6plex [K12]; 1xTMT6plex [N-Term]	1	1	1	Q60662	Q60662 [376-387]		0	1883.99	93.3	93.4	87.5	31.3	36.3	38	2	-1.09	58.5259
							[K].ISPSTDSLAK.[D]	1xTMT6plex [K10]; 1xTMT6plex [N-Term]	1	1	1	Q60662	Q60662 [535-544]		0	1476.87							2	1.94	48.577
	145.2	134.7	143.8	61.7	59	55.6	[K].RNLFNHGK.[Q]	1xTMT6plex [K8]; 1xTMT6plex [N-Term]	1	1	1	Q60662	Q60662 [408-415]		1	1443.86	166.3	161.1	160	65	62.7	56.8	4	-5.89	36.6449
	145	136.1	138.3	61.9	60.6	58	[K].NQSLEFSAMK.[A]	1xOxidation [M9]; 1xTMT6plex [K10]; 1xTMT6plex [N-Term]	1	1	2	Q60662	Q60662 [461-470]		0	1628.87	246.5	241.5	228.2	96.8	95.6	87.9	2	-4.27	49.5489
							[K].IASEMAHEAVELTSSEMR.[G]	2xOxidation [M5; M17]; 1xTMT6plex [N-Term]	1	1	1	Q60662	Q60662 [269-286]		0	2252.07							3	-0.34	49.4514
	157.6	154.8	147.3	46.2	48.6	45.5	[K].EIKDKLEGGSK.[C]	3xTMT6plex [K3; K5; K11]; 1xTMT6plex [N-Term]	1	1	2	Q60662	Q60662 [235-245]		2	2120.31	706.2	724.3	641.2	190.4	202.1	181.8	4	-3.53	48.539
							[K].QNAADIMEAMLK.[R]	2xOxidation [M7; M10]; 1xTMT6plex [K12]; 1xTMT6plex [N-Term]	1	1	1	Q60662	Q60662 [416-427]		0	1824.96							3	-1.68	48.5839
	139.2	140	135.4	67.9	59.1	58.4	[K].QNAADIMEAMLKR.[L]	1xOxidation [M10]; 1xTMT6plex [K12]; 1xTMT6plex [N-Term]	1	1	1	Q60662	Q60662 [416-428]		1	1965.07	112.8	118.4	106.5	50.6	44.4	42.2	3	-4.75	54.521
	149.3	159	150.4	47.9	47.3	46.1	[K].LCLIMAK.[Y]	1xCarbamidomethyl [C2]; 1xTMT6plex [K7]; 1xTMT6plex [N-Term]	1	1	2	Q60662	Q60662 [706-712]		0	1306.8	966.3	1074.4	945.4	285.2	284	265.9	2	1.88	58.6217
	128.1	122	121.9	80.8	69.1	78.1	[R].LSSLVIQMAR.[K]	1xOxidation [M8]; 1xTMT6plex [N-Term]	1	1	1	Q60662	Q60662 [224-233]		0	1362.8	103.4	102.8	95.6	60	51.8	56.2	2	0.63	55.9537
	136.1	126.7	131	59.3	62.3	84.6	[K].ESLTMWNNQK.[Q]	1xOxidation [M5]; 1xTMT6plex [K10]; 1xTMT6plex [N-Term]	1	1	3	Q60662	Q60662 [503-512]		0	1724.9	172	167.1	160.8	68.9	73.1	95.3	2	-7.19	51.3874
	129.2	136.6	90.5	85.1	72.4	86.2	[K].CLHHSMYTSGDK.[G]	1xCarbamidomethyl [C1]; 1xOxidation [M6]; 1xTMT6plex [K12]; 1xTMT6plex [N-Term]	1	1	1	Q60662	Q60662 [246-257]		0	1909.93	17.5	19.3	11.9	10.6	9.1	10.4	4	-5.32	32.4457
	152.2	152.3	157	43.4	47.7	47.3	[R].LEMAASK.[N]	1xTMT6plex [K7]; 1xTMT6plex [N-Term]	1	1	1	Q60662	Q60662 [177-183]		0	1207.71	253.1	264.3	253.4	66.4	73.6	70.1	2	-3.59	47.5912
	123.8	124.8	129.5	70.8	74.2	76.9	[K].LPEVSAK.[A]	1xTMT6plex [K7]; 1xTMT6plex [N-Term]	1	1	2	Q60662	Q60662 [799-805]		0	1201.76	399.4	420.1	405.8	210.2	222.1	221	2	-3.19	49.4582
	156.9	152.5	148.7	46.1	48.7	47	[R].VSEHILK.[E]	1xTMT6plex [K7]; 1xTMT6plex [N-Term]	1	1	1	Q60662	Q60662 [496-502]		0	1283.81	171.2	173.7	157.5	46.3	49.3	45.7	3	-1.69	44.1192
							[K].ERQLDEAVGNMAR.[K]	1xOxidation [M11]; 1xTMT6plex [N-Term]	1	1	1	Q60662	Q60662 [826-838]		1	1733.88							3	-0.62	38.9248
	97.8	99	96.8	101.1	102.4	102.8	[K].LLSESPFSCDELTESDNKR.[C]	1xCarbamidomethyl [C9]; 1xTMT6plex [K18]; 1xTMT6plex [N-Term]	1	1	1	Q60662	Q60662 [638-656]		1	2685.34	28.4	30	27.3	27	27.6	26.6	4	1.8	58.367
							[K].SLTSAER.[V]	1xTMT6plex [N-Term]	1	1	1	Q60662	Q60662 [489-495]		0	992.557							2	-0.09	32.4982
141	139.5	140.6	58.8	61.2	58.9	Q922U2	Keratin, type II cytoskeletal 5 OS=Mus musculus OX=10090 GN=Krt5 PE=1 SV=1	15	12	14	8	580	61.7	7.75	675.2	697.2	653.9	259.1	272.1	251.4
	Abundances (Grouped): F1, 126	Abundances (Grouped): F1, 127	Abundances (Grouped): F1, 128	Abundances (Grouped): F1, 129	Abundances (Grouped): F1, 130	Abundances (Grouped): F1, 131	Annotated Sequence	Modifications	# Protein Groups	# Proteins	# PSMs	Master Protein Accessions	Positions in Master Proteins	Modifications in Master Proteins	# Missed Cleavages	Theo. MH+ [Da]	Abundance: F1: 126, Sample	Abundance: F1: 127, Sample	Abundance: F1: 128, Sample	Abundance: F1: 129, Sample	Abundance: F1: 130, Sample	Abundance: F1: 131, Sample	Charge (by Search Engine): Sequest HT	DeltaM [ppm] (by Search Engine): Sequest HT	RT [min] (by Search Engine): Sequest HT
	152.4	137	132.6	54.3	66.3	57.5	[K].YEELQQTAGR.[H]	1xTMT6plex [N-Term]	1	1	1	Q922U2	Q922U2 [359-368]		0	1423.74	34.2	32.1	28.9	11.2	13.8	11.5	2	1.56	44.1729
	125.6	135.5	135.6	64.6	65.7	73	[R].LRSEIDNVK.[K]	1xTMT6plex [K9]; 1xTMT6plex [N-Term]	1	1	1	Q922U2	Q922U2 [390-398]		1	1531.92	82.4	92.8	86.4	39	40	42.7	3	-2.63	46.1538
	134.8	147.4	132.8	66.3	50.9	67.9	[R].TEAESWYQTK.[Y]	1xTMT6plex [K10]; 1xTMT6plex [N-Term]	1	1	1	Q922U2	Q922U2 [349-358]		0	1700.89	25.4	29	24.3	11.5	8.9	11.4	2	2.88	52.8353
	128.4	119.3	145.9	54.5	67.9	84	[R].SRTEAESWYQTK.[Y]	1xTMT6plex [K12]; 1xTMT6plex [N-Term]	1	1	1	Q922U2	Q922U2 [347-358]		1	1944.02	26.9	26.1	29.7	10.5	13.2	15.7	3	-1.2	47.312
							[R].NTKHEISEMNR.[M]	1xTMT6plex [K3]; 1xTMT6plex [N-Term]	1	1	1	Q922U2	Q922U2 [375-385]		1	1816.97							4	-1.33	35.7099
	145.1	142.8	144.2	58	57.9	52.1	[R].LRSEIDNVKK.[Q]	2xTMT6plex [K9; K10]; 1xTMT6plex [N-Term]	1	1	1	Q922U2	Q922U2 [390-399]		2	1889.18	263.2	270.4	254	96.8	97.5	84.2	4	-3.55	45.2479
	87.8	91.2	88.9	113.6	110.4	108	[R].FLEQQNK.[AILVM]	1xTMT6plex [K7]; 1xTMT6plex [N-Term]	4	22	2	P50446; Q3UV17; Q922U2; P20152	P50446 [172-178]; Q3UV17 [185-191]; Q922U2 [182-188]; P20152 [123-129]		0	1364.79	395.3	428.4	388.6	470.2	461.2	433.4	2	-0.31	48.304
							[K].LLEGEECR.[MLI]	1xCarbamidomethyl [C7]; 1xTMT6plex [N-Term]	5	11	1	Q3TTY5; Q6NXH9; P50446; Q3UV17; Q922U2	Q3TTY5 [504-511]; Q6NXH9 [436-443]; P50446 [457-464]; Q3UV17 [472-479]; Q922U2 [467-474]		0	1234.63							2	-0.08	45.1569
	138	129.2	141.2	54.5	62.3	74.9	[R].SEIDNVK.[K]	1xTMT6plex [K7]; 1xTMT6plex [N-Term]	1	1	1	Q922U2	Q922U2 [392-398]		0	1262.74	30.8	30.1	30.6	11.2	12.9	14.9	2	0.17	42.919
	147.2	142.9	141.5	54.7	61	52.8	[K].NKYEDEINKR.[T]	2xTMT6plex [K2; K9]; 1xTMT6plex [N-Term]	1	4	2	Q922U2	Q922U2 [250-259]		2	1996.14	193.8	196.3	180.8	66.2	74.5	61.9	4	-4	41.7829
	118.1	124.7	126.2	88.1	77.7	65.2	[K].DVDAAYMNK.[V]	1xTMT6plex [K9]; 1xTMT6plex [N-Term]	2	4	1	P50446; Q922U2	P50446 [262-270]; Q922U2 [272-280]		0	1484.78	18.5	20.4	19.2	12.7	11.3	9.1	2	0.4	49.7925
							[R].GRLDSELR.[N]	1xTMT6plex [N-Term]	2	4	1	P50446; Q922U2	P50446 [222-229]; Q922U2 [232-239]		1	1174.67							3	-2.12	37.1956
141	135.8	120.4	47	80.3	75.5	Q91ZZ3	Beta-synuclein OS=Mus musculus OX=10090 GN=Sncb PE=1 SV=1	7	1	1	1	133	14	4.37	17.6	17.7	14.6	5.4	9.3	8.4
	Abundances (Grouped): F1, 126	Abundances (Grouped): F1, 127	Abundances (Grouped): F1, 128	Abundances (Grouped): F1, 129	Abundances (Grouped): F1, 130	Abundances (Grouped): F1, 131	Annotated Sequence	Modifications	# Protein Groups	# Proteins	# PSMs	Master Protein Accessions	Positions in Master Proteins	Modifications in Master Proteins	# Missed Cleavages	Theo. MH+ [Da]	Abundance: F1: 126, Sample	Abundance: F1: 127, Sample	Abundance: F1: 128, Sample	Abundance: F1: 129, Sample	Abundance: F1: 130, Sample	Abundance: F1: 131, Sample	Charge (by Search Engine): Sequest HT	DeltaM [ppm] (by Search Engine): Sequest HT	RT [min] (by Search Engine): Sequest HT
	141	135.8	120.4	47	80.3	75.5	[K].QGVTEAAEK.[T]	1xTMT6plex [K9]; 1xTMT6plex [N-Term]	1	2	1	Q91ZZ3	Q91ZZ3 [24-32]		0	1390.79	17.6	17.7	14.6	5.4	9.3	8.4	2	3.3	38.5224
140.8	140.8	124.8	61.4	67.3	64.9	D6RDE1	Centrosomal protein of 57 kDa OS=Mus musculus OX=10090 GN=Cep57 PE=4 SV=1	9	1	1	1	122	13.2	11.71	127.8	133.4	110	51.3	56.7	52.5
	Abundances (Grouped): F1, 126	Abundances (Grouped): F1, 127	Abundances (Grouped): F1, 128	Abundances (Grouped): F1, 129	Abundances (Grouped): F1, 130	Abundances (Grouped): F1, 131	Annotated Sequence	Modifications	# Protein Groups	# Proteins	# PSMs	Master Protein Accessions	Positions in Master Proteins	Modifications in Master Proteins	# Missed Cleavages	Theo. MH+ [Da]	Abundance: F1: 126, Sample	Abundance: F1: 127, Sample	Abundance: F1: 128, Sample	Abundance: F1: 129, Sample	Abundance: F1: 130, Sample	Abundance: F1: 131, Sample	Charge (by Search Engine): Sequest HT	DeltaM [ppm] (by Search Engine): Sequest HT	RT [min] (by Search Engine): Sequest HT
	140.8	140.8	124.8	61.4	67.3	64.9	[R].SLVLSAGALER.[C]	1xTMT6plex [N-Term]	1	1	1	D6RDE1	D6RDE1 [78-88]		0	1344.8	127.8	133.4	110	51.3	56.7	52.5	2	-0.18	54.8889
140.2	142.6	149.8	57.9	54.5	55	J3QJW4	RIKEN cDNA 4930544D05 gene OS=Mus musculus OX=10090 GN=4930544D05Rik PE=4 SV=1	29	4	5	1	171	18.3	6.79	196	208.1	203.3	74.4	70.7	68.5
	Abundances (Grouped): F1, 126	Abundances (Grouped): F1, 127	Abundances (Grouped): F1, 128	Abundances (Grouped): F1, 129	Abundances (Grouped): F1, 130	Abundances (Grouped): F1, 131	Annotated Sequence	Modifications	# Protein Groups	# Proteins	# PSMs	Master Protein Accessions	Positions in Master Proteins	Modifications in Master Proteins	# Missed Cleavages	Theo. MH+ [Da]	Abundance: F1: 126, Sample	Abundance: F1: 127, Sample	Abundance: F1: 128, Sample	Abundance: F1: 129, Sample	Abundance: F1: 130, Sample	Abundance: F1: 131, Sample	Charge (by Search Engine): Sequest HT	DeltaM [ppm] (by Search Engine): Sequest HT	RT [min] (by Search Engine): Sequest HT
							[R].LDGGNDCPGPAPDTGDPGR.[A]	1xCarbamidomethyl [C7]; 1xTMT6plex [N-Term]	2	2	1	J3QJW4; J3QK56	J3QJW4 [102-120]; J3QK56 [102-120]		0	2096.95							2	-1.79	42.9696
	140.2	142.6	149.8	57.9	54.5	55	[R].LGKPQGVAQQQ.[-]	1xTMT6plex [K3]; 1xTMT6plex [N-Term]	1	1	2	J3QJW4	J3QJW4 [161-171]		0	1611.96	196	208.1	203.3	74.4	70.7	68.5	2	-5.55	42.325
							[K].ATLGLVLR.[E]	1xTMT6plex [N-Term]	2	3	1	J3QJW4; J3QK56	J3QJW4 [67-74]; J3QK56 [67-74]		0	1071.71							2	-3.9	56.4377
							[R].QAGTAAGASAR.[Y]	1xTMT6plex [N-Term]	2	2	1	J3QJW4; J3QK56	J3QJW4 [135-145]; J3QK56 [135-145]		0	1189.65							2	1.29	22.4862
140.1	136.2	133.2	59.8	70	60.8	B1AZ99	OTU domain-containing protein 3 OS=Mus musculus OX=10090 GN=Otud3 PE=1 SV=1	16	8	11	8	396	44.6	9.22	70.1	71.1	64.7	27.5	32.5	27.1
	Abundances (Grouped): F1, 126	Abundances (Grouped): F1, 127	Abundances (Grouped): F1, 128	Abundances (Grouped): F1, 129	Abundances (Grouped): F1, 130	Abundances (Grouped): F1, 131	Annotated Sequence	Modifications	# Protein Groups	# Proteins	# PSMs	Master Protein Accessions	Positions in Master Proteins	Modifications in Master Proteins	# Missed Cleavages	Theo. MH+ [Da]	Abundance: F1: 126, Sample	Abundance: F1: 127, Sample	Abundance: F1: 128, Sample	Abundance: F1: 129, Sample	Abundance: F1: 130, Sample	Abundance: F1: 131, Sample	Charge (by Search Engine): Sequest HT	DeltaM [ppm] (by Search Engine): Sequest HT	RT [min] (by Search Engine): Sequest HT
	134.9	132.4	131.1	60.3	76.3	65	[K].LREVPGDGNCLFR.[A]	1xCarbamidomethyl [C10]; 1xTMT6plex [N-Term]	1	1	1	B1AZ99	B1AZ99 [66-78]		1	1761.93	48.4	49.6	45.7	19.9	25.4	20.8	3	-2.26	52.7447
							[R].ALGDQLEGHSR.[N]	1xTMT6plex [N-Term]	1	1	1	B1AZ99	B1AZ99 [79-89]		0	1411.75							3	-7.92	39.8547
	153.4	145.7	138.4	58.4	54.1	50	[K].DGLRDDVEDAVHK.[V]	1xTMT6plex [K13]; 1xTMT6plex [N-Term]	1	1	1	B1AZ99	B1AZ99 [225-237]		1	1927.03	21.7	21.5	19	7.6	7.1	6.3	4	-0.22	50.109
							[R].YGEHYDSVRR.[I]	1xTMT6plex [N-Term]	1	1	1	B1AZ99	B1AZ99 [178-187]		1	1510.76							4	-1.69	31.7146
							[R].ELHIAYR.[Y]	1xTMT6plex [N-Term]	1	1	1	B1AZ99	B1AZ99 [171-177]		0	1130.65							3	-0.28	43.8821
							[K].HRQETVDYMIR.[Q]	1xTMT6plex [N-Term]	1	1	2	B1AZ99	B1AZ99 [94-104]		1	1676.87							4	-2.74	39.1284
							[R].YGEHYDSVR.[R]	1xTMT6plex [N-Term]	1	1	2	B1AZ99	B1AZ99 [178-186]		0	1354.66							3	-1.95	35.957
							[R].EVPGDGNCLFR.[A]	1xCarbamidomethyl [C8]; 1xTMT6plex [N-Term]	1	1	1	B1AZ99	B1AZ99 [68-78]		0	1492.74							2	7.16	53.447
							[K].HRQETVDYMIR.[Q]	1xOxidation [M9]; 1xTMT6plex [N-Term]	1	1	1	B1AZ99	B1AZ99 [94-104]		1	1692.87							4	-3.61	34.3917
139.5	142.7	134.1	63.3	57.5	63	Q6GQX2	Nck-associated protein 5-like OS=Mus musculus OX=10090 GN=Nckap5l PE=1 SV=1	1	1	1	1	1323	138.1	8.37	618.2	660.1	576.9	257.9	236.3	248.7
	Abundances (Grouped): F1, 126	Abundances (Grouped): F1, 127	Abundances (Grouped): F1, 128	Abundances (Grouped): F1, 129	Abundances (Grouped): F1, 130	Abundances (Grouped): F1, 131	Annotated Sequence	Modifications	# Protein Groups	# Proteins	# PSMs	Master Protein Accessions	Positions in Master Proteins	Modifications in Master Proteins	# Missed Cleavages	Theo. MH+ [Da]	Abundance: F1: 126, Sample	Abundance: F1: 127, Sample	Abundance: F1: 128, Sample	Abundance: F1: 129, Sample	Abundance: F1: 130, Sample	Abundance: F1: 131, Sample	Charge (by Search Engine): Sequest HT	DeltaM [ppm] (by Search Engine): Sequest HT	RT [min] (by Search Engine): Sequest HT
	139.5	142.7	134.1	63.3	57.5	63	[R].GAVALGTSSLK.[Q]	1xTMT6plex [K11]; 1xTMT6plex [N-Term]	1	1	1	Q6GQX2	Q6GQX2 [721-731]		0	1461.9	618.2	660.1	576.9	257.9	236.3	248.7	2	-3.42	51.7889
139.4	137.9	137.2	63.8	61.4	60.3	Q9D9Q3	FUN14 domain-containing 2B OS=Mus musculus OX=10090 GN=Fundc2b PE=2 SV=1	20	6	8	6	184	20.2	9.57	1419.1	1465.3	1356.6	597.8	580.3	546.9
	Abundances (Grouped): F1, 126	Abundances (Grouped): F1, 127	Abundances (Grouped): F1, 128	Abundances (Grouped): F1, 129	Abundances (Grouped): F1, 130	Abundances (Grouped): F1, 131	Annotated Sequence	Modifications	# Protein Groups	# Proteins	# PSMs	Master Protein Accessions	Positions in Master Proteins	Modifications in Master Proteins	# Missed Cleavages	Theo. MH+ [Da]	Abundance: F1: 126, Sample	Abundance: F1: 127, Sample	Abundance: F1: 128, Sample	Abundance: F1: 129, Sample	Abundance: F1: 130, Sample	Abundance: F1: 131, Sample	Charge (by Search Engine): Sequest HT	DeltaM [ppm] (by Search Engine): Sequest HT	RT [min] (by Search Engine): Sequest HT
	137.4	133.9	138.9	65.6	67.2	57.1	[K].SAQIPTEVK.[S]	1xTMT6plex [K9]; 1xTMT6plex [N-Term]	1	1	2	Q9D9Q3	Q9D9Q3 [146-154]		0	1430.86	126.9	129.1	124.6	55.7	57.6	47	2	-2.07	46.9225
	120.5	118.3	119.1	82.8	81	78.4	[K].SKAEEVVCFVK.[K]	1xCarbamidomethyl [C8]; 2xTMT6plex [K2; K11]; 1xTMT6plex [N-Term]	1	1	1	Q9D9Q3	Q9D9Q3 [155-165]		1	1983.16	543.2	556.4	521.3	343.3	338.6	314.9	3	-5.28	55.7259
	149.8	151.5	146.1	49	50.4	53.1	[K].AKEQLTIR.[K]	1xTMT6plex [K2]; 1xTMT6plex [N-Term]	1	1	1	Q9D9Q3	Q9D9Q3 [137-144]		1	1416.89	241.5	254.9	228.7	72.7	75.4	76.3	3	-4.25	41.1869
	123	140.3	141.2	68.5	56.3	70.7	[R].KLFGQESR.[S]	1xTMT6plex [K1]; 1xTMT6plex [N-Term]	1	1	2	Q9D9Q3	Q9D9Q3 [63-70]		1	1422.85	36.7	43.7	40.9	18.8	15.6	18.8	3	-5.8	42.5474
	166.1	153.2	160.2	42.7	37.3	40.5	[K].LFGQESR.[S]	1xTMT6plex [N-Term]	1	1	1	Q9D9Q3	Q9D9Q3 [64-70]		0	1065.59	208.5	200.7	195.3	49.3	43.5	45.3	2	0.13	46.8153
	165.5	169.6	159.8	39.8	33.7	31.6	[K].EQLTIRK.[S]	1xTMT6plex [K7]; 1xTMT6plex [N-Term]	1	1	1	Q9D9Q3	Q9D9Q3 [139-145]		1	1345.86	262.3	280.5	245.8	58	49.6	44.6	3	-4.29	42.774
139.2	150.6	144	58.6	52.1	55.6	Q6PFC5	Leucine-rich repeat, immunoglobulin-like domain and transmembrane domain-containing protein 2 OS=Mus musculus OX=10090 GN=Lrit2 PE=2 SV=1	2	1	2	1	549	61.3	6.52	154	174	154.7	59.6	53.5	54.8
	Abundances (Grouped): F1, 126	Abundances (Grouped): F1, 127	Abundances (Grouped): F1, 128	Abundances (Grouped): F1, 129	Abundances (Grouped): F1, 130	Abundances (Grouped): F1, 131	Annotated Sequence	Modifications	# Protein Groups	# Proteins	# PSMs	Master Protein Accessions	Positions in Master Proteins	Modifications in Master Proteins	# Missed Cleavages	Theo. MH+ [Da]	Abundance: F1: 126, Sample	Abundance: F1: 127, Sample	Abundance: F1: 128, Sample	Abundance: F1: 129, Sample	Abundance: F1: 130, Sample	Abundance: F1: 131, Sample	Charge (by Search Engine): Sequest HT	DeltaM [ppm] (by Search Engine): Sequest HT	RT [min] (by Search Engine): Sequest HT
	139.2	150.6	144	58.6	52.1	55.6	[R].LRGLAQFVK.[S]	1xTMT6plex [K9]; 1xTMT6plex [N-Term]	1	1	2	Q6PFC5	Q6PFC5 [208-216]		1	1489.96	154	174	154.7	59.6	53.5	54.8	3	-0.22	56.0776
138.7	133.5	129.3	65.3	66.6	66.6	Q80X83	BPI fold-containing family A member 3 OS=Mus musculus OX=10090 GN=Bpifa3 PE=2 SV=1	24	4	10	4	239	26.5	8.47	195.4	196.3	176.8	84.6	87.1	83.6
	Abundances (Grouped): F1, 126	Abundances (Grouped): F1, 127	Abundances (Grouped): F1, 128	Abundances (Grouped): F1, 129	Abundances (Grouped): F1, 130	Abundances (Grouped): F1, 131	Annotated Sequence	Modifications	# Protein Groups	# Proteins	# PSMs	Master Protein Accessions	Positions in Master Proteins	Modifications in Master Proteins	# Missed Cleavages	Theo. MH+ [Da]	Abundance: F1: 126, Sample	Abundance: F1: 127, Sample	Abundance: F1: 128, Sample	Abundance: F1: 129, Sample	Abundance: F1: 130, Sample	Abundance: F1: 131, Sample	Charge (by Search Engine): Sequest HT	DeltaM [ppm] (by Search Engine): Sequest HT	RT [min] (by Search Engine): Sequest HT
							[R].MEPSSGGASMSTEETSPK.[M]	1xTMT6plex [K18]; 1xTMT6plex [N-Term]	1	2	3	Q80X83	Q80X83 [167-184]		0	2271.09							3	0.66	45.5661
							[R].MEPSSGGASMSTEETSPK.[M]	1xOxidation [M1]; 1xTMT6plex [K18]; 1xTMT6plex [N-Term]	1	2	2	Q80X83	Q80X83 [167-184]		0	2287.08							3	6.89	41.1109
	148.6	139.5	135.9	53.6	63.2	59.1	[K].VIPNLVESQVCPLIGEILR.[Q]	1xCarbamidomethyl [C11]; 1xTMT6plex [N-Term]	1	2	1	Q80X83	Q80X83 [199-217]		0	2378.37	76.2	74.7	67.7	25.3	30.1	27	2	-3.94	59.4988
	120.7	131.4	119.7	76.8	74.3	77	[K].GLVEQVPAHNLGQP.[-]	1xTMT6plex [N-Term]	1	1	3	Q80X83	Q80X83 [226-239]		0	1687.93	83.7	95.1	80.6	49	47.8	47.6	2	0.71	52.0702
	175.4	125.4	145	55.3	49	49.9	[R].ELVMGR.[C]	1xTMT6plex [N-Term]	1	3	1	Q80X83	Q80X83 [159-164]		0	933.539	35.5	26.5	28.5	10.3	9.2	9	2	0.44	43.5599
138.6	137.3	136.4	62.5	61.5	63.8	P19253	60S ribosomal protein L13a OS=Mus musculus OX=10090 GN=Rpl13a PE=1 SV=4	58	14	21	14	203	23.4	11.02	1837.4	1899.9	1755.4	762.1	756.1	753.9
	Abundances (Grouped): F1, 126	Abundances (Grouped): F1, 127	Abundances (Grouped): F1, 128	Abundances (Grouped): F1, 129	Abundances (Grouped): F1, 130	Abundances (Grouped): F1, 131	Annotated Sequence	Modifications	# Protein Groups	# Proteins	# PSMs	Master Protein Accessions	Positions in Master Proteins	Modifications in Master Proteins	# Missed Cleavages	Theo. MH+ [Da]	Abundance: F1: 126, Sample	Abundance: F1: 127, Sample	Abundance: F1: 128, Sample	Abundance: F1: 129, Sample	Abundance: F1: 130, Sample	Abundance: F1: 131, Sample	Charge (by Search Engine): Sequest HT	DeltaM [ppm] (by Search Engine): Sequest HT	RT [min] (by Search Engine): Sequest HT
	138.3	125.7	129.2	79.6	63	64.1	[-].MAEGQVLVLDGR.[G]	1xTMT6plex [N-Term]; 1xMet-loss [N-Term]	1	5	2	P19253	P19253 [1-12]	P19253 1xMet-loss [N-Term]	0	1385.79	52.5	49.8	47.6	27.8	22.2	21.7	2	-1.05	51.9466
	114.9	169.2	111.3	68.1	73	63.5	[K].RMVVPAALK.[V]	1xTMT6plex [K9]; 1xTMT6plex [N-Term]	1	7	2	P19253	P19253 [117-125]		1	1442.93	13.4	20.6	12.6	7.3	7.9	6.6	3	-3.48	50.2924
	154.7	147.5	139.5	52	53.9	52.3	[K].YQAVTATLEEK.[R]	1xTMT6plex [K11]; 1xTMT6plex [N-Term]	1	6	2	P19253	P19253 [149-159]		0	1710.97	241.2	240	211.2	74.6	77.9	72.7	2	0.97	56.5619
	150.8	155.8	156.2	45.3	43.5	48.4	[R].CEGINISGNFYR.[N]	1xCarbamidomethyl [C1]; 1xTMT6plex [N-Term]	1	9	1	P19253	P19253 [38-49]		0	1658.82	152.1	164	153	42	40.7	43.5	2	-9.17	55.7564
	112	117.4	114	94.3	74.3	88.1	[R].MNTNPSRGPYHFR.[A]	1xOxidation [M1]; 1xTMT6plex [N-Term]	1	9	3	P19253	P19253 [62-74]		1	1821.9	34.1	37.3	33.7	26.4	21	23.9	4	-2.59	35.0486
	123.5	118.8	121.1	75.5	79.1	82.1	[K].VLDGIPPPYDKK.[K]	2xTMT6plex [K11; K12]; 1xTMT6plex [N-Term]	1	5	1	P19253	P19253 [104-115]		1	2029.23	227.3	228.1	216.3	127.8	135.1	134.6	3	-0.04	55.3056
	148.2	142.3	152.5	52	53.9	51.1	[R].LAHEVGWK.[Y]	1xTMT6plex [K8]; 1xTMT6plex [N-Term]	1	7	1	P19253	P19253 [141-148]		0	1397.83	190.6	191.1	190.5	61.5	64.4	58.6	3	-3.64	49.1081
							[K].QVLLGRK.[V]	1xTMT6plex [K7]; 1xTMT6plex [N-Term]	1	9	1	P19253	P19253 [26-32]		1	1271.86							3	-4.63	42.8832
	134.2	132.3	125.6	76.8	71.9	59.2	[R].MVVPAALK.[V]	1xTMT6plex [K8]; 1xTMT6plex [N-Term]	1	7	2	P19253	P19253 [118-125]		0	1286.83	37.4	38.5	34	19.7	18.6	14.7	2	-3.29	56.551
	146.4	146.9	151.8	52.4	51.5	51	[K].YLAFLRK.[R]	1xTMT6plex [K7]; 1xTMT6plex [N-Term]	1	9	1	P19253	P19253 [54-60]		1	1368.88	275.5	288.5	277.3	90.7	90	85.6	3	-2.39	58.282
							[K].RGQAALER.[L]	1xTMT6plex [N-Term]	1	7	1	P19253	P19253 [94-101]		1	1129.66							3	0.34	24.5406
	129.3	123.4	123.2	75.4	69.7	78.9	[K].FAYLGR.[L]	1xTMT6plex [N-Term]	1	7	1	P19253	P19253 [135-140]		0	955.556	74.8	74.5	69.2	40.1	37.4	40.7	2	-0.15	53.3828
							[K].TNGLLV.[-]	1xTMT6plex [N-Term]	1	6	1	P19253	P19253 [198-203]		0	845.529							2	-2.81	57.2342
	126.7	128.4	121.8	73.4	71.6	78.1	[R].MVVPAALK.[V]	1xOxidation [M1]; 1xTMT6plex [K8]; 1xTMT6plex [N-Term]	1	7	1	P19253	P19253 [118-125]		0	1302.82	358.9	379.7	335.1	191.3	188.3	197.2	2	-5.98	49.1282
	150.8	151.1	151.3	48.3	47.6	51	[R].GMLPHK.[T]	1xTMT6plex [K6]; 1xTMT6plex [N-Term]	1	6	1	P19253	P19253 [86-91]		0	1140.7	179.6	187.8	174.9	52.9	52.6	54.1	3	-8.1	41.4356
138.2	145.4	132.7	58.4	63.3	61.9	K3W4P1	Next to BRCA1 gene 1 protein OS=Mus musculus OX=10090 GN=Nbr1 PE=1 SV=1	6	5	6	5	988	110	5.1	173.6	190.7	161.9	67.5	73.8	69.3
	Abundances (Grouped): F1, 126	Abundances (Grouped): F1, 127	Abundances (Grouped): F1, 128	Abundances (Grouped): F1, 129	Abundances (Grouped): F1, 130	Abundances (Grouped): F1, 131	Annotated Sequence	Modifications	# Protein Groups	# Proteins	# PSMs	Master Protein Accessions	Positions in Master Proteins	Modifications in Master Proteins	# Missed Cleavages	Theo. MH+ [Da]	Abundance: F1: 126, Sample	Abundance: F1: 127, Sample	Abundance: F1: 128, Sample	Abundance: F1: 129, Sample	Abundance: F1: 130, Sample	Abundance: F1: 131, Sample	Charge (by Search Engine): Sequest HT	DeltaM [ppm] (by Search Engine): Sequest HT	RT [min] (by Search Engine): Sequest HT
	133.2	151.6	130.2	51.4	73.6	60	[R].GAEGEPGIESGLEPTEAR.[E]	1xTMT6plex [N-Term]	1	7	1	K3W4P1	K3W4P1 [781-798]		0	2028.01	23.4	27.8	22.2	8.3	12	9.4	2	0.51	49.2594
	131.6	92.1	97.1	88.5	92.4	98.2	[R].SLTLDAAPDHNPPCR.[Q]	1xCarbamidomethyl [C14]; 1xTMT6plex [N-Term]	1	7	2	K3W4P1	K3W4P1 [657-671]		0	1892.95	21.5	15.7	15.4	13.3	14	14.3	3	-2.04	44.9945
							[K].ETVEKLEQR.[L]	1xTMT6plex [K5]; 1xTMT6plex [N-Term]	1	6	1	K3W4P1	K3W4P1 [169-177]		1	1589.93							3	-2.87	43.9687
	127.1	152.9	148.3	46.5	64.7	60.5	[K].NVVENQAAAR.[T]	1xTMT6plex [N-Term]	1	6	1	K3W4P1	K3W4P1 [97-106]		0	1300.72	30.9	38.8	35	10.4	14.6	13.1	2	3.39	33.7895
	145.1	154.1	136.4	57.3	53.1	54.1	[K].GQQFGPR.[V]	1xTMT6plex [N-Term]	1	7	1	K3W4P1	K3W4P1 [466-472]		0	1018.56	97.8	108.4	89.3	35.5	33.2	32.5	2	-0.33	34.8055
138.1	135.4	135.9	62.3	64.4	63.8	P83882	60S ribosomal protein L36a OS=Mus musculus OX=10090 GN=Rpl36a PE=1 SV=2	38	9	11	9	106	12.4	10.58	1441.1	1474.6	1377	597.6	623.7	593.7
	Abundances (Grouped): F1, 126	Abundances (Grouped): F1, 127	Abundances (Grouped): F1, 128	Abundances (Grouped): F1, 129	Abundances (Grouped): F1, 130	Abundances (Grouped): F1, 131	Annotated Sequence	Modifications	# Protein Groups	# Proteins	# PSMs	Master Protein Accessions	Positions in Master Proteins	Modifications in Master Proteins	# Missed Cleavages	Theo. MH+ [Da]	Abundance: F1: 126, Sample	Abundance: F1: 127, Sample	Abundance: F1: 128, Sample	Abundance: F1: 129, Sample	Abundance: F1: 130, Sample	Abundance: F1: 131, Sample	Charge (by Search Engine): Sequest HT	DeltaM [ppm] (by Search Engine): Sequest HT	RT [min] (by Search Engine): Sequest HT
	131.9	131.5	136.4	65.3	71.6	63.3	[K].GKDSLYAQGK.[QR]	2xTMT6plex [K2; K10]; 1xTMT6plex [N-Term]	1	3	1	P83882	P83882 [29-38]		1	1754.04	289.6	301.4	290.9	131.9	145.9	123.9	3	-2.99	42.0223
	136	141.5	138	58.2	62.7	63.7	[K].KGKDSLYAQGK.[QR]	3xTMT6plex [K1; K3; K11]; 1xTMT6plex [N-Term]	1	3	1	P83882	P83882 [28-38]		2	2111.3	226.6	246.1	223.4	89.2	96.9	94.6	4	-5.41	40.9872
							[K].DSLYAQGK.[QR]	1xTMT6plex [K8]; 1xTMT6plex [N-Term]	1	3	1	P83882	P83882 [31-38]		0	1339.76							2	-0.18	44.1661
	149.5	134.4	130.2	60.1	59.8	66	[K].HFELGGDKK.[R]	2xTMT6plex [K8; K9]; 1xTMT6plex [N-Term]	1	2	1	P83882	P83882 [90-98]		1	1718.02	380.8	357.3	321.9	140.7	141.4	149.9	4	-3.52	43.9188
	135.7	132.6	141.1	67	59.3	64.2	[R].LECVEPNCR.[S]	2xCarbamidomethyl [C3; C8]; 1xTMT6plex [N-Term]	1	2	3	P83882	P83882 [70-78]		0	1405.68	191.3	195.1	193.2	86.9	77.6	80.7	2	1.67	44.3906
	124.1	113.4	126.8	76.5	81.7	77.6	[K].HFELGGDK.[K]	1xTMT6plex [K8]; 1xTMT6plex [N-Term]	1	2	1	P83882	P83882 [90-97]		0	1360.76	113.8	108.5	112.9	64.5	69.5	63.4	3	2.27	46.6031
							[K].IVLRLECVEPNCR.[S]	2xCarbamidomethyl [C7; C12]; 1xTMT6plex [N-Term]	1	2	1	P83882	P83882 [66-78]		1	1887.01							3	-0.53	55.3026
	140.8	150.3	142.4	54.1	58.7	53.7	[K].RMLAIK.[R]	1xTMT6plex [K6]; 1xTMT6plex [N-Term]	1	2	1	P83882	P83882 [81-86]		1	1189.79	239	266.2	234.7	84.4	92.4	81.2	3	-1.86	45.8467
							[K].DSLYAQGKR.[R]	1xTMT6plex [K8]; 1xTMT6plex [N-Term]	1	2	1	P83882	P83882 [31-39]		1	1495.86							3	-3.03	38.5144
137.9	130.9	138.3	61.7	65.2	66	Q9CPT0	Apoptosis facilitator Bcl-2-like protein 14 OS=Mus musculus OX=10090 GN=Bcl2l14 PE=1 SV=1	29	10	14	10	328	37	7.49	714.7	708.3	695.8	294.2	313.5	304.7
	Abundances (Grouped): F1, 126	Abundances (Grouped): F1, 127	Abundances (Grouped): F1, 128	Abundances (Grouped): F1, 129	Abundances (Grouped): F1, 130	Abundances (Grouped): F1, 131	Annotated Sequence	Modifications	# Protein Groups	# Proteins	# PSMs	Master Protein Accessions	Positions in Master Proteins	Modifications in Master Proteins	# Missed Cleavages	Theo. MH+ [Da]	Abundance: F1: 126, Sample	Abundance: F1: 127, Sample	Abundance: F1: 128, Sample	Abundance: F1: 129, Sample	Abundance: F1: 130, Sample	Abundance: F1: 131, Sample	Charge (by Search Engine): Sequest HT	DeltaM [ppm] (by Search Engine): Sequest HT	RT [min] (by Search Engine): Sequest HT
	165.2	133.3	149.7	49.1	56.4	46.3	[K].NKDGEDQIISK.[I]	2xTMT6plex [K2; K11]; 1xTMT6plex [N-Term]	1	1	2	Q9CPT0	Q9CPT0 [202-212]		1	1934.12	155.2	130.7	136.6	42.4	49.2	38.8	3	-1.64	44.7594
	110.2	124.7	122.7	72.4	80.5	89.5	[R].VAEKEEGLPSSPK.[E]	2xTMT6plex [K4; K13]; 1xTMT6plex [N-Term]	1	2	2	Q9CPT0	Q9CPT0 [98-110]		1	2058.2	57.1	67.4	61.7	34.5	38.7	41.3	3	-0.12	46.4393
							[R].QSGFHNQHWPR.[S]	1xTMT6plex [N-Term]	1	1	1	Q9CPT0	Q9CPT0 [126-136]		0	1622.81							4	-1.95	36.9278
	101.3	92.2	94.6	101.9	100.3	109.6	[R].AQGPQGPFPVER.[Q]	1xTMT6plex [N-Term]	1	2	1	Q9CPT0	Q9CPT0 [114-125]		0	1511.82	102.1	97	92.6	94.5	93.8	98.5	2	0.07	47.7676
	120.2	122.8	128.4	75.8	74.4	78.4	[R].LESEVVDSK.[V]	1xTMT6plex [K9]; 1xTMT6plex [N-Term]	1	1	1	Q9CPT0	Q9CPT0 [145-153]		0	1463.84	89	94.9	92.3	51.6	51.1	51.7	2	-1.34	50.8783
	175.8	169.9	182.9	25.1	23.3	23.1	[R].DVDTRGESEVK.[A]	1xTMT6plex [K11]; 1xTMT6plex [N-Term]	1	1	3	Q9CPT0	Q9CPT0 [257-267]		1	1692.92	201.9	203.7	204	26.5	24.8	23.6	3	1.37	37.7645
	137.7	128.7	130.5	54.2	77.2	71.7	[K].LTAIDNHPMNR.[M]	1xTMT6plex [N-Term]	1	1	1	Q9CPT0	Q9CPT0 [283-293]		0	1510.8	44.8	43.7	41.2	16.2	23.3	20.8	3	-3.1	43.5151
							[K].ILGISHEEVD.[-]	1xTMT6plex [N-Term]	1	1	1	Q9CPT0	Q9CPT0 [319-328]		0	1340.73							2	-2.17	54.2605
	151.8	162.8	126.8	50.1	58.6	50	[K].DGEDQIISK.[I]	1xTMT6plex [K9]; 1xTMT6plex [N-Term]	1	1	1	Q9CPT0	Q9CPT0 [204-212]		0	1462.82	20.1	22.5	16.3	6.1	7.2	5.9	2	-0.48	47.1071
	120.1	125.2	142.1	65.7	73.9	73	[K].VACIANR.[V]	1xCarbamidomethyl [C3]; 1xTMT6plex [N-Term]	1	1	1	Q9CPT0	Q9CPT0 [154-160]		0	1032.58	44.5	48.4	51.1	22.4	25.4	24.1	2	-3.1	38.5531
137.7	128.1	121.8	63.4	75.3	73.7	Q91VE5	Protocadherin beta 10 OS=Mus musculus OX=10090 GN=Pcdhb10 PE=2 SV=1	1	1	1	1	797	87.5	4.84	255.1	247.8	219.2	108	129.5	121.7
	Abundances (Grouped): F1, 126	Abundances (Grouped): F1, 127	Abundances (Grouped): F1, 128	Abundances (Grouped): F1, 129	Abundances (Grouped): F1, 130	Abundances (Grouped): F1, 131	Annotated Sequence	Modifications	# Protein Groups	# Proteins	# PSMs	Master Protein Accessions	Positions in Master Proteins	Modifications in Master Proteins	# Missed Cleavages	Theo. MH+ [Da]	Abundance: F1: 126, Sample	Abundance: F1: 127, Sample	Abundance: F1: 128, Sample	Abundance: F1: 129, Sample	Abundance: F1: 130, Sample	Abundance: F1: 131, Sample	Charge (by Search Engine): Sequest HT	DeltaM [ppm] (by Search Engine): Sequest HT	RT [min] (by Search Engine): Sequest HT
	137.7	128.1	121.8	63.4	75.3	73.7	[-].MEMTLAK.[T]	1xTMT6plex [K7]; 1xTMT6plex [N-Term]; 1xMet-loss [N-Term]	1	1	1	Q91VE5	Q91VE5 [1-7]	Q91VE5 1xMet-loss [N-Term]	0	1150.69	255.1	247.8	219.2	108	129.5	121.7	2	0.31	46.1071
137.5	154.8	141.6	58.2	48.3	59.7	A0A494BBN4	Predicted gene 550 OS=Mus musculus OX=10090 GN=Gm550 PE=4 SV=1	16	3	3	3	184	20.5	4.28	39.3	46.2	39.3	15.3	12.8	15.2
	Abundances (Grouped): F1, 126	Abundances (Grouped): F1, 127	Abundances (Grouped): F1, 128	Abundances (Grouped): F1, 129	Abundances (Grouped): F1, 130	Abundances (Grouped): F1, 131	Annotated Sequence	Modifications	# Protein Groups	# Proteins	# PSMs	Master Protein Accessions	Positions in Master Proteins	Modifications in Master Proteins	# Missed Cleavages	Theo. MH+ [Da]	Abundance: F1: 126, Sample	Abundance: F1: 127, Sample	Abundance: F1: 128, Sample	Abundance: F1: 129, Sample	Abundance: F1: 130, Sample	Abundance: F1: 131, Sample	Charge (by Search Engine): Sequest HT	DeltaM [ppm] (by Search Engine): Sequest HT	RT [min] (by Search Engine): Sequest HT
	122.4	165.7	153.3	53.7	49.5	55.4	[R].LTQETDEDSQVKAEGHSK.[E]	2xTMT6plex [K12; K18]; 1xTMT6plex [N-Term]	1	1	1	A0A494BBN4	A0A494BBN4 [128-145]		1	2689.42	20.8	29.4	25.3	8.4	7.8	8.4	4	0.08	42.386
	159.6	138.9	124.4	64.7	46.5	65.8	[R].RTSEEIELLQR.[D]	1xTMT6plex [N-Term]	1	1	1	A0A494BBN4	A0A494BBN4 [72-82]		1	1602.9	18.5	16.8	14	6.9	5	6.8	3	1.01	47.9058
							[R].LTQETDEDSQVK.[A]	1xTMT6plex [K12]; 1xTMT6plex [N-Term]	1	1	1	A0A494BBN4	A0A494BBN4 [128-139]		0	1850.97							2	3.42	44.9624
137.5	130.9	148.6	61.2	61.3	60.5	B2RXB0	Golgi-associated RAB2 interactor protein 1A OS=Mus musculus OX=10090 GN=Garin1a PE=1 SV=1	13	3	3	3	297	32.8	7.21	102	101.4	107.1	41.8	42.2	40
	Abundances (Grouped): F1, 126	Abundances (Grouped): F1, 127	Abundances (Grouped): F1, 128	Abundances (Grouped): F1, 129	Abundances (Grouped): F1, 130	Abundances (Grouped): F1, 131	Annotated Sequence	Modifications	# Protein Groups	# Proteins	# PSMs	Master Protein Accessions	Positions in Master Proteins	Modifications in Master Proteins	# Missed Cleavages	Theo. MH+ [Da]	Abundance: F1: 126, Sample	Abundance: F1: 127, Sample	Abundance: F1: 128, Sample	Abundance: F1: 129, Sample	Abundance: F1: 130, Sample	Abundance: F1: 131, Sample	Charge (by Search Engine): Sequest HT	DeltaM [ppm] (by Search Engine): Sequest HT	RT [min] (by Search Engine): Sequest HT
	135	123.3	144.3	65.5	64	67.9	[R].NSSSLLELSNR.[H]	1xTMT6plex [N-Term]	1	2	1	B2RXB0	B2RXB0 [218-228]		0	1448.79	81.8	78	84.9	36.5	36	36.7	2	0.43	51.7566
	148.5	164.8	168.1	42.4	49.1	27.2	[K].QGNWMDAYER.[S]	1xTMT6plex [N-Term]	1	1	1	B2RXB0	B2RXB0 [55-64]		0	1498.69	20.2	23.4	22.2	5.3	6.2	3.3	2	0.71	54.5695
							[R].DRHTDTATETDNSGNCK.[S]	1xCarbamidomethyl [C16]; 1xTMT6plex [K17]; 1xTMT6plex [N-Term]	1	1	1	B2RXB0	B2RXB0 [234-250]		1	2380.12							4	-3.3	26.2295
137.2	138.2	139.2	63	60.9	61.4	Q9D1R9	60S ribosomal protein L34 OS=Mus musculus OX=10090 GN=Rpl34 PE=1 SV=2	32	5	8	5	117	13.3	11.47	805.7	847.4	793.7	340.3	332.1	321.6
	Abundances (Grouped): F1, 126	Abundances (Grouped): F1, 127	Abundances (Grouped): F1, 128	Abundances (Grouped): F1, 129	Abundances (Grouped): F1, 130	Abundances (Grouped): F1, 131	Annotated Sequence	Modifications	# Protein Groups	# Proteins	# PSMs	Master Protein Accessions	Positions in Master Proteins	Modifications in Master Proteins	# Missed Cleavages	Theo. MH+ [Da]	Abundance: F1: 126, Sample	Abundance: F1: 127, Sample	Abundance: F1: 128, Sample	Abundance: F1: 129, Sample	Abundance: F1: 130, Sample	Abundance: F1: 131, Sample	Charge (by Search Engine): Sequest HT	DeltaM [ppm] (by Search Engine): Sequest HT	RT [min] (by Search Engine): Sequest HT
	131.9	140	144.8	64.3	62	57	[R].RLSYNTASNK.[T]	1xTMT6plex [K10]; 1xTMT6plex [N-Term]	1	3	1	Q9D1R9	Q9D1R9 [10-19]		1	1611.92	181	200.4	192.9	81.1	78.9	69.7	3	-6.42	37.717
	141.7	136.2	140.2	59.6	60.8	61.4	[K].RAFLIEEQK.[I]	1xTMT6plex [K9]; 1xTMT6plex [N-Term]	1	1	1	Q9D1R9	Q9D1R9 [93-101]		1	1591.96	201.3	201.9	193.3	77.9	80.2	77.8	3	-2.06	49.1805
	133.9	134.8	130.7	67.8	66	66.8	[R].AYGGSMCAK.[C]	1xCarbamidomethyl [C7]; 1xTMT6plex [K9]; 1xTMT6plex [N-Term]	1	2	3	Q9D1R9	Q9D1R9 [77-85]		0	1402.72	315	331.1	298.5	146.7	144.1	140.2	2	-5.21	42.1567
							[R].LSYNTASNK.[T]	1xTMT6plex [K9]; 1xTMT6plex [N-Term]	1	3	1	Q9D1R9	Q9D1R9 [11-19]		0	1455.82							2	-5.3	43.8498
	148.9	150.1	154.2	51.7	42.8	52.3	[K].SACGVCPGR.[L]	2xCarbamidomethyl [C3; C6]; 1xTMT6plex [N-Term]	1	3	2	Q9D1R9	Q9D1R9 [44-52]		0	1192.58	108.4	114	109	34.6	28.9	33.9	2	2.2	30.3244
137.2	134	130.3	62.2	66.9	69.4	Q9D6V8	Polyadenylate-binding protein-interacting protein 2 OS=Mus musculus OX=10090 GN=Paip2 PE=1 SV=1	6	1	1	1	124	14.7	4.12	137.4	140.1	126.7	57.3	62.2	62
	Abundances (Grouped): F1, 126	Abundances (Grouped): F1, 127	Abundances (Grouped): F1, 128	Abundances (Grouped): F1, 129	Abundances (Grouped): F1, 130	Abundances (Grouped): F1, 131	Annotated Sequence	Modifications	# Protein Groups	# Proteins	# PSMs	Master Protein Accessions	Positions in Master Proteins	Modifications in Master Proteins	# Missed Cleavages	Theo. MH+ [Da]	Abundance: F1: 126, Sample	Abundance: F1: 127, Sample	Abundance: F1: 128, Sample	Abundance: F1: 129, Sample	Abundance: F1: 130, Sample	Abundance: F1: 131, Sample	Charge (by Search Engine): Sequest HT	DeltaM [ppm] (by Search Engine): Sequest HT	RT [min] (by Search Engine): Sequest HT
	137.2	134	130.3	62.2	66.9	69.4	[K].SNLNPNAK.[E]	1xTMT6plex [K8]; 1xTMT6plex [N-Term]	1	1	1	Q9D6V8	Q9D6V8 [109-116]		0	1315.77	137.4	140.1	126.7	57.3	62.2	62	2	-0.9	37.8211
137.2	117	106.8	95.7	72.1	71.2	Q9DCT5	Stromal cell-derived factor 2 OS=Mus musculus OX=10090 GN=Sdf2 PE=1 SV=1	15	3	4	3	211	23.1	7.33	20.1	17.9	15.2	12.9	9.8	9.3
	Abundances (Grouped): F1, 126	Abundances (Grouped): F1, 127	Abundances (Grouped): F1, 128	Abundances (Grouped): F1, 129	Abundances (Grouped): F1, 130	Abundances (Grouped): F1, 131	Annotated Sequence	Modifications	# Protein Groups	# Proteins	# PSMs	Master Protein Accessions	Positions in Master Proteins	Modifications in Master Proteins	# Missed Cleavages	Theo. MH+ [Da]	Abundance: F1: 126, Sample	Abundance: F1: 127, Sample	Abundance: F1: 128, Sample	Abundance: F1: 129, Sample	Abundance: F1: 130, Sample	Abundance: F1: 131, Sample	Charge (by Search Engine): Sequest HT	DeltaM [ppm] (by Search Engine): Sequest HT	RT [min] (by Search Engine): Sequest HT
							[K].EVHGMAQPSQNNYWK.[A]	1xTMT6plex [K15]; 1xTMT6plex [N-Term]	1	2	1	Q9DCT5	Q9DCT5 [175-189]		0	2247.14							3	-1.55	49.4186
							[R].AEVHHAEL.[-]	1xTMT6plex [N-Term]	1	2	2	Q9DCT5	Q9DCT5 [204-211]		0	1134.61							3	-1.41	33.0526
	137.2	117	106.8	95.7	72.1	71.2	[R].LTHINTGR.[N]	1xTMT6plex [N-Term]	1	2	1	Q9DCT5	Q9DCT5 [94-101]		0	1140.67	20.1	17.9	15.2	12.9	9.8	9.3	3	-2	34.9786
136.8	133.9	132.3	63.5	63.3	70.4	Q7SIG6	Arf-GAP with SH3 domain, ANK repeat and PH domain-containing protein 2 OS=Mus musculus OX=10090 GN=Asap2 PE=1 SV=3	1	1	1	1	958	106.7	6.65	41	41.9	38.5	17.5	17.6	18.8
	Abundances (Grouped): F1, 126	Abundances (Grouped): F1, 127	Abundances (Grouped): F1, 128	Abundances (Grouped): F1, 129	Abundances (Grouped): F1, 130	Abundances (Grouped): F1, 131	Annotated Sequence	Modifications	# Protein Groups	# Proteins	# PSMs	Master Protein Accessions	Positions in Master Proteins	Modifications in Master Proteins	# Missed Cleavages	Theo. MH+ [Da]	Abundance: F1: 126, Sample	Abundance: F1: 127, Sample	Abundance: F1: 128, Sample	Abundance: F1: 129, Sample	Abundance: F1: 130, Sample	Abundance: F1: 131, Sample	Charge (by Search Engine): Sequest HT	DeltaM [ppm] (by Search Engine): Sequest HT	RT [min] (by Search Engine): Sequest HT
	136.8	133.9	132.3	63.5	63.3	70.4	[K].EIISEVQR.[M]	1xTMT6plex [N-Term]	1	3	1	Q7SIG6	Q7SIG6 [425-432]		0	1202.69	41	41.9	38.5	17.5	17.6	18.8	2	-1.2	53.2892
136.5	114	129.7	77.5	72.1	70.2	Q8K4W8	Chloride channel protein OS=Mus musculus OX=10090 GN=Clcn3 PE=1 SV=1	4	3	3	2	791	87.9	7.03	46.9	40.9	43.3	24.5	23	21.5
	Abundances (Grouped): F1, 126	Abundances (Grouped): F1, 127	Abundances (Grouped): F1, 128	Abundances (Grouped): F1, 129	Abundances (Grouped): F1, 130	Abundances (Grouped): F1, 131	Annotated Sequence	Modifications	# Protein Groups	# Proteins	# PSMs	Master Protein Accessions	Positions in Master Proteins	Modifications in Master Proteins	# Missed Cleavages	Theo. MH+ [Da]	Abundance: F1: 126, Sample	Abundance: F1: 127, Sample	Abundance: F1: 128, Sample	Abundance: F1: 129, Sample	Abundance: F1: 130, Sample	Abundance: F1: 131, Sample	Charge (by Search Engine): Sequest HT	DeltaM [ppm] (by Search Engine): Sequest HT	RT [min] (by Search Engine): Sequest HT
							[R].QCLVTHNGR.[L]	1xCarbamidomethyl [C2]; 1xTMT6plex [N-Term]	2	4	1	Q8K4W8; Q9WVD4	Q8K4W8 [755-763]; Q9WVD4 [780-788]		0	1313.69							3	-0.97	28.868
	136.5	114	129.7	77.5	72.1	70.2	[R].DLTIAIESAR.[K]	1xTMT6plex [N-Term]	1	5	1	Q8K4W8	Q8K4W8 [684-693]		0	1317.76	46.9	40.9	43.3	24.5	23	21.5	2	0.71	56.4059
							[R].EGIYEAHIR.[L]	1xTMT6plex [N-Term]	1	5	1	Q8K4W8	Q8K4W8 [600-608]		0	1316.72							3	0.25	42.393
136.1	139.2	135.8	62.9	63.3	62.7	Q9CQ84	Ubiquitin-like protein 4B OS=Mus musculus OX=10090 GN=Ubl4b PE=2 SV=1	24	5	6	5	188	20.5	5.01	584.4	623.5	566	248.5	252	239.9
	Abundances (Grouped): F1, 126	Abundances (Grouped): F1, 127	Abundances (Grouped): F1, 128	Abundances (Grouped): F1, 129	Abundances (Grouped): F1, 130	Abundances (Grouped): F1, 131	Annotated Sequence	Modifications	# Protein Groups	# Proteins	# PSMs	Master Protein Accessions	Positions in Master Proteins	Modifications in Master Proteins	# Missed Cleavages	Theo. MH+ [Da]	Abundance: F1: 126, Sample	Abundance: F1: 127, Sample	Abundance: F1: 128, Sample	Abundance: F1: 129, Sample	Abundance: F1: 130, Sample	Abundance: F1: 131, Sample	Charge (by Search Engine): Sequest HT	DeltaM [ppm] (by Search Engine): Sequest HT	RT [min] (by Search Engine): Sequest HT
	111.2	135.6	122.1	75.5	79.4	76.1	[K].LVSQHLQVPEEQQHLLFR.[G]	1xTMT6plex [N-Term]	1	1	1	Q9CQ84	Q9CQ84 [29-46]		0	2430.35	28.5	36.3	30.4	17.8	18.9	17.4	4	-3.46	55.7652
							[K].TVLGFLRQEHEER.[L]	1xTMT6plex [N-Term]	1	1	1	Q9CQ84	Q9CQ84 [107-119]		1	1843							4	-5.28	52.8342
	129.3	130.9	124.9	72.9	72.5	69.6	[K].ESVATLK.[K]	1xTMT6plex [K7]; 1xTMT6plex [N-Term]	1	1	1	Q9CQ84	Q9CQ84 [21-27]		0	1205.75	113	119.4	106	58.6	58.8	54.2	2	-1.43	45.7175
							[R].GQLLADDK.[Y]	1xTMT6plex [K8]; 1xTMT6plex [N-Term]	1	1	2	Q9CQ84	Q9CQ84 [47-54]		0	1317.78							2	5.79	47.6663
	140.1	141.7	139.9	59.2	59.4	59.7	[K].TVLGFLR.[Q]	1xTMT6plex [N-Term]	1	1	1	Q9CQ84	Q9CQ84 [107-113]		0	1034.66	442.9	467.8	429.6	172.1	174.3	168.3	2	-1.14	58.6535
136.1	137	137.2	64	62.5	63.3	Q99PL6	UBX domain-containing protein 6 OS=Mus musculus OX=10090 GN=Ubxn6 PE=1 SV=1	26	14	21	14	442	49.8	8.54	2009.8	2110.9	1967.1	868.6	856.4	833.1
	Abundances (Grouped): F1, 126	Abundances (Grouped): F1, 127	Abundances (Grouped): F1, 128	Abundances (Grouped): F1, 129	Abundances (Grouped): F1, 130	Abundances (Grouped): F1, 131	Annotated Sequence	Modifications	# Protein Groups	# Proteins	# PSMs	Master Protein Accessions	Positions in Master Proteins	Modifications in Master Proteins	# Missed Cleavages	Theo. MH+ [Da]	Abundance: F1: 126, Sample	Abundance: F1: 127, Sample	Abundance: F1: 128, Sample	Abundance: F1: 129, Sample	Abundance: F1: 130, Sample	Abundance: F1: 131, Sample	Charge (by Search Engine): Sequest HT	DeltaM [ppm] (by Search Engine): Sequest HT	RT [min] (by Search Engine): Sequest HT
	150	157.3	160.1	45.9	42.7	43.9	[R].EALQNDWLPFELR.[A]	1xTMT6plex [N-Term]	1	1	1	Q99PL6	Q99PL6 [368-380]		0	1859.99	252.3	276.3	261.6	71	66.7	65.9	2	-1.77	58.9571
	151.5	140.8	163.2	46.4	44.5	53.6	[R].QGPTDEAQMAAAAALAR.[L]	1xTMT6plex [N-Term]	1	1	2	Q99PL6	Q99PL6 [46-62]		0	1900.97	33	32	34.5	9.3	9	10.4	2	-0.8	56.5192
	149.4	147.9	149.1	54.1	47.9	51.5	[K].YLDNIHLHPEEEK.[Y]	1xTMT6plex [K13]; 1xTMT6plex [N-Term]	1	2	2	Q99PL6	Q99PL6 [181-193]		0	2095.12	183.7	189.8	178	61.2	54.6	56.4	3	0.55	51.1538
	177.6	179	176.2	19.3	26.8	21	[K].YLDNIHLHPEEEKYQK.[I]	2xTMT6plex [K13; K16]; 1xTMT6plex [N-Term]	1	2	1	Q99PL6	Q99PL6 [181-196]		1	2743.5	176.2	185.3	169.7	17.6	24.7	18.6	5	-1.02	51.7161
	128.4	124.8	121.5	71.8	67.1	86.3	[R].HKQQLLDAEPVR.[A]	1xTMT6plex [K2]; 1xTMT6plex [N-Term]	1	1	1	Q99PL6	Q99PL6 [256-267]		1	1892.11	84.8	86	77.9	43.6	41.1	50.8	4	-2.61	41.6131
	127.5	132.5	130.3	69	72	68.7	[R].HKQQLLDAEPVRATLDR.[Q]	1xTMT6plex [K2]; 1xTMT6plex [N-Term]	1	1	2	Q99PL6	Q99PL6 [256-272]		2	2448.41	41.4	44.9	41.1	20.6	21.7	19.9	5	-3.48	46.5966
							[R].QGPTDEAQMAAAAALAR.[L]	1xOxidation [M9]; 1xTMT6plex [N-Term]	1	1	3	Q99PL6	Q99PL6 [46-62]		0	1916.97							3	0.8	54.4914
	106.9	123.9	141.1	62	75	91	[K].QQLLDAEPVR.[A]	1xTMT6plex [N-Term]	1	1	1	Q99PL6	Q99PL6 [258-267]		0	1397.79	19.5	23.6	25	10.4	12.7	14.8	2	-5.53	49.5748
							[K].ELQAEATSSNNPGAPGTNSVPEPK.[E]	1xTMT6plex [K24]; 1xTMT6plex [N-Term]	1	2	1	Q99PL6	Q99PL6 [86-109]		0	2853.46							3	-0.84	49.0404
							[R].KELQAEATSSNNPGAPGTNSVPEPK.[E]	2xTMT6plex [K1; K25]; 1xTMT6plex [N-Term]	1	2	1	Q99PL6	Q99PL6 [85-109]		1	3210.72							4	7.56	47.4068
	131.1	137.8	138.4	67.6	61.1	63.9	[R].KYTYALVR.[V]	1xTMT6plex [K1]; 1xTMT6plex [N-Term]	1	1	2	Q99PL6	Q99PL6 [333-340]		1	1471.9	149.3	163.8	153	70.8	64.6	64.9	3	-5.77	48.3612
	112.5	111	112.3	90	86.9	87.3	[K].GKSPQLALR.[Q]	1xTMT6plex [K2]; 1xTMT6plex [N-Term]	1	1	1	Q99PL6	Q99PL6 [34-42]		1	1427.91	322.7	332.3	312.6	237.3	231.4	223.2	3	-5.14	41.3645
	135.3	137.4	135.7	65	63	63.5	[R].EKLSALFR.[F]	1xTMT6plex [K2]; 1xTMT6plex [N-Term]	1	1	1	Q99PL6	Q99PL6 [357-364]		1	1421.89	498.2	527.9	485.2	220.1	215.3	208.3	3	-5.46	55.1522
	138.9	133.3	131.4	64.8	69	62.6	[K].YTYALVR.[V]	1xTMT6plex [N-Term]	1	1	1	Q99PL6	Q99PL6 [334-340]		0	1114.65	248.7	249	228.5	106.7	114.6	99.9	2	-3.7	50.4985
							[K].GKSPQLALRQPR.[Q]	1xTMT6plex [K2]; 1xTMT6plex [N-Term]	1	1	1	Q99PL6	Q99PL6 [34-45]		2	1809.12							4	-0.52	39.7109
136.1	143.7	133.8	63.4	60	63	Q8R3G9	Tetraspanin-8 OS=Mus musculus OX=10090 GN=Tspan8 PE=1 SV=1	13	2	2	2	235	25.6	5.16	275.1	303.2	262.6	117.9	112.5	113.6
	Abundances (Grouped): F1, 126	Abundances (Grouped): F1, 127	Abundances (Grouped): F1, 128	Abundances (Grouped): F1, 129	Abundances (Grouped): F1, 130	Abundances (Grouped): F1, 131	Annotated Sequence	Modifications	# Protein Groups	# Proteins	# PSMs	Master Protein Accessions	Positions in Master Proteins	Modifications in Master Proteins	# Missed Cleavages	Theo. MH+ [Da]	Abundance: F1: 126, Sample	Abundance: F1: 127, Sample	Abundance: F1: 128, Sample	Abundance: F1: 129, Sample	Abundance: F1: 130, Sample	Abundance: F1: 131, Sample	Charge (by Search Engine): Sequest HT	DeltaM [ppm] (by Search Engine): Sequest HT	RT [min] (by Search Engine): Sequest HT
	136.1	143.7	133.8	63.4	60	63	[K].LLSDNTDEAK.[D]	1xTMT6plex [K10]; 1xTMT6plex [N-Term]	1	1	1	Q8R3G9	Q8R3G9 [127-136]		0	1563.86	275.1	303.2	262.6	117.9	112.5	113.6	2	2.58	49.1586
							[K].ESCQCTGTDCATYQGSSVYPK.[T]	3xCarbamidomethyl [C3; C5; C10]; 1xTMT6plex [K21]; 1xTMT6plex [N-Term]	1	1	1	Q8R3G9	Q8R3G9 [170-190]		0	2857.28							3	-0.75	47.6255
136	107.8	121	77.4	71.4	86.3	Q9WUI1	Mitogen-activated protein kinase 11 OS=Mus musculus OX=10090 GN=Mapk11 PE=1 SV=2	2	1	1	1	364	41.4	5.78	38.2	31.6	33	20	18.6	21.6
	Abundances (Grouped): F1, 126	Abundances (Grouped): F1, 127	Abundances (Grouped): F1, 128	Abundances (Grouped): F1, 129	Abundances (Grouped): F1, 130	Abundances (Grouped): F1, 131	Annotated Sequence	Modifications	# Protein Groups	# Proteins	# PSMs	Master Protein Accessions	Positions in Master Proteins	Modifications in Master Proteins	# Missed Cleavages	Theo. MH+ [Da]	Abundance: F1: 126, Sample	Abundance: F1: 127, Sample	Abundance: F1: 128, Sample	Abundance: F1: 129, Sample	Abundance: F1: 130, Sample	Abundance: F1: 131, Sample	Charge (by Search Engine): Sequest HT	DeltaM [ppm] (by Search Engine): Sequest HT	RT [min] (by Search Engine): Sequest HT
	136	107.8	121	77.4	71.4	86.3	[R].LLKHLK.[H]	2xTMT6plex [K3; K6]; 1xTMT6plex [N-Term]	1	1	1	Q9WUI1	Q9WUI1 [74-79]		1	1439.01	38.2	31.6	33	20	18.6	21.6	4	-0.67	47.6523
136	125.3	129.7	75.5	67.4	66.1	Q9DB30	Phosphorylase b kinase gamma catalytic chain, liver/testis isoform OS=Mus musculus OX=10090 GN=Phkg2 PE=2 SV=2	10	4	4	4	406	46.5	6.48	151.3	145.5	140.1	77.2	69.6	65.5
	Abundances (Grouped): F1, 126	Abundances (Grouped): F1, 127	Abundances (Grouped): F1, 128	Abundances (Grouped): F1, 129	Abundances (Grouped): F1, 130	Abundances (Grouped): F1, 131	Annotated Sequence	Modifications	# Protein Groups	# Proteins	# PSMs	Master Protein Accessions	Positions in Master Proteins	Modifications in Master Proteins	# Missed Cleavages	Theo. MH+ [Da]	Abundance: F1: 126, Sample	Abundance: F1: 127, Sample	Abundance: F1: 128, Sample	Abundance: F1: 129, Sample	Abundance: F1: 130, Sample	Abundance: F1: 131, Sample	Charge (by Search Engine): Sequest HT	DeltaM [ppm] (by Search Engine): Sequest HT	RT [min] (by Search Engine): Sequest HT
							[R].LSLEQLEEVRDATRR.[E]	1xTMT6plex [N-Term]	1	2	1	Q9DB30	Q9DB30 [62-76]		2	2044.13							4	-1.38	55.8577
	128	126	146.3	77.6	57.9	64.2	[K].IMEVSAER.[L]	1xTMT6plex [N-Term]	1	4	1	Q9DB30	Q9DB30 [54-61]		0	1163.63	43.6	44.8	48.4	24.3	18.3	19.5	2	-1.89	47.0173
	135.7	121.3	115.9	77.1	78	71.9	[K].LLQVDPEAR.[L]	1xTMT6plex [N-Term]	1	1	1	Q9DB30	Q9DB30 [271-279]		0	1269.74	53.8	50.2	44.6	28.1	28.7	25.4	2	-1.18	53.3708
	143.6	128.9	129.2	71.8	64.9	61.6	[R].GVSSVVR.[R]	1xTMT6plex [N-Term]	1	6	1	Q9DB30	Q9DB30 [33-39]		0	932.573	53.9	50.5	47.1	24.8	22.6	20.6	2	-1.12	36.3326
136	132.1	131.9	68	66.9	65.2	Q8CH19	Casein kinase II subunit alpha'-interacting protein OS=Mus musculus OX=10090 GN=Csnka2ip PE=1 SV=2	8	6	6	6	720	79.2	9.63	376	381.1	354	173	171.7	160.6
	Abundances (Grouped): F1, 126	Abundances (Grouped): F1, 127	Abundances (Grouped): F1, 128	Abundances (Grouped): F1, 129	Abundances (Grouped): F1, 130	Abundances (Grouped): F1, 131	Annotated Sequence	Modifications	# Protein Groups	# Proteins	# PSMs	Master Protein Accessions	Positions in Master Proteins	Modifications in Master Proteins	# Missed Cleavages	Theo. MH+ [Da]	Abundance: F1: 126, Sample	Abundance: F1: 127, Sample	Abundance: F1: 128, Sample	Abundance: F1: 129, Sample	Abundance: F1: 130, Sample	Abundance: F1: 131, Sample	Charge (by Search Engine): Sequest HT	DeltaM [ppm] (by Search Engine): Sequest HT	RT [min] (by Search Engine): Sequest HT
	130.4	131.2	146.3	63.1	69.2	59.8	[K].VQNTASLSDK.[Q]	1xTMT6plex [K10]; 1xTMT6plex [N-Term]	1	1	1	Q8CH19	Q8CH19 [332-341]		0	1520.87	100.7	105.8	109.7	44.8	49.6	41.2	2	-2.32	43.6347
	141.3	131.2	124.9	72.3	61.6	68.6	[K].GGSVPVDVVNK.[I]	1xTMT6plex [K11]; 1xTMT6plex [N-Term]	1	1	1	Q8CH19	Q8CH19 [412-422]		0	1528.91	88	85.3	75.5	41.4	35.6	38.1	2	0.39	49.5348
	151.3	135.8	143.2	53.2	58.5	58.1	[K].CLAVSSESK.[D]	1xCarbamidomethyl [C1]; 1xTMT6plex [K9]; 1xTMT6plex [N-Term]	1	2	1	Q8CH19	Q8CH19 [569-577]		0	1438.8	85.6	80.2	78.7	27.7	30.7	29.3	2	-1.85	43.7803
	124.6	133.9	114.1	79.5	74.2	73.7	[R].AINTAVCHPK.[V]	1xCarbamidomethyl [C7]; 1xTMT6plex [K10]; 1xTMT6plex [N-Term]	1	1	1	Q8CH19	Q8CH19 [322-331]		0	1568.9	85	95.4	75.6	49.9	47	44.8	3	-2.35	39.2457
	137.3	113.4	122.8	82.2	78	66.4	[K].QNQSYSQSMCK.[E]	1xCarbamidomethyl [C10]; 1xTMT6plex [K11]; 1xTMT6plex [N-Term]	1	1	1	Q8CH19	Q8CH19 [35-45]		0	1818.89	16.7	14.4	14.5	9.2	8.8	7.2	3	1.05	40.6632
							[K].NSSYPSWK.[S]	1xTMT6plex [K8]; 1xTMT6plex [N-Term]	1	1	1	Q8CH19	Q8CH19 [96-103]		0	1426.77							2	-5.19	49.3752
135.7	134.1	133.1	65.8	67.2	64.1	Q6ZWN5	40S ribosomal protein S9 OS=Mus musculus OX=10090 GN=Rps9 PE=1 SV=3	53	14	23	14	194	22.6	10.65	2262.9	2332.9	2154.7	1009.1	1039.6	953.2
	Abundances (Grouped): F1, 126	Abundances (Grouped): F1, 127	Abundances (Grouped): F1, 128	Abundances (Grouped): F1, 129	Abundances (Grouped): F1, 130	Abundances (Grouped): F1, 131	Annotated Sequence	Modifications	# Protein Groups	# Proteins	# PSMs	Master Protein Accessions	Positions in Master Proteins	Modifications in Master Proteins	# Missed Cleavages	Theo. MH+ [Da]	Abundance: F1: 126, Sample	Abundance: F1: 127, Sample	Abundance: F1: 128, Sample	Abundance: F1: 129, Sample	Abundance: F1: 130, Sample	Abundance: F1: 131, Sample	Charge (by Search Engine): Sequest HT	DeltaM [ppm] (by Search Engine): Sequest HT	RT [min] (by Search Engine): Sequest HT
	147.3	138.4	150.7	51.6	51.9	60.2	[R].KQVVNIPSFIVR.[L]	1xTMT6plex [K1]; 1xTMT6plex [N-Term]	1	1	1	Q6ZWN5	Q6ZWN5 [139-150]		1	1858.17	130.7	128.2	129.8	42.1	42.7	47.6	3	-0.84	58.3005
	134.7	125.7	134.6	66.4	73	65.6	[R].LFEGNALLRR.[L]	1xTMT6plex [N-Term]	1	4	2	Q6ZWN5	Q6ZWN5 [71-80]		1	1417.85	229.5	223.6	222.6	104	115.4	99.7	3	-5.04	54.3265
	144	154.6	132.1	55.9	53.1	60.3	[K].KGQGGAGAGDDEEED.[-]	1xTMT6plex [K1]; 1xTMT6plex [N-Term]	1	1	1	Q6ZWN5	Q6ZWN5 [180-194]		1	1892.89	74	82.9	65.9	26.4	25.3	27.6	2	3.08	32.1696
	135.9	136.1	128.8	65.5	66	67.8	[R].ELLTLDEKDPRR.[L]	1xTMT6plex [K8]; 1xTMT6plex [N-Term]	1	5	2	Q6ZWN5	Q6ZWN5 [59-70]		2	1943.13	155	162	142.6	68.7	69.9	68.9	4	-2.54	50.4026
	150.3	155	138.9	52.7	55.2	47.9	[K].IEDFLERR.[L]	1xTMT6plex [N-Term]	1	4	1	Q6ZWN5	Q6ZWN5 [102-109]		1	1306.73	119.1	128.2	106.9	38.4	40.6	33.8	3	-1.56	56.7527
	121	147.9	123	76.5	66.7	65	[R].ELLTLDEKDPR.[R]	1xTMT6plex [K8]; 1xTMT6plex [N-Term]	1	5	3	Q6ZWN5	Q6ZWN5 [59-69]		1	1787.03	100.3	128	99	58.3	51.3	48	2	4.45	53.9909
							[R].ELLTLDEK.[D]	1xTMT6plex [K8]; 1xTMT6plex [N-Term]	1	5	1	Q6ZWN5	Q6ZWN5 [59-66]		0	1418.85							2	0.03	57.6447
	134.2	132.4	136.5	72.1	64.7	60.1	[R].RLQTQVFK.[L]	1xTMT6plex [K8]; 1xTMT6plex [N-Term]	1	4	2	Q6ZWN5	Q6ZWN5 [109-116]		1	1477.93	47.6	49	47	23.5	21.3	19	3	-3.56	44.6531
	120.7	119.1	125	77.5	79.9	77.8	[K].LIGEYGLR.[N]	1xTMT6plex [N-Term]	1	6	2	Q6ZWN5	Q6ZWN5 [31-38]		0	1149.68	592.8	610.3	595.7	350	363.9	340.4	2	-4.56	55.7281
	149.2	142.9	140.7	57.9	58.5	50.9	[R].IGVLDEGK.[M]	1xTMT6plex [K8]; 1xTMT6plex [N-Term]	1	4	1	Q6ZWN5	Q6ZWN5 [84-91]		0	1288.79	425.2	425.1	389.5	151.7	154.6	129.2	2	-2	53.8028
	146.5	145.4	135.3	56.4	58.2	58.2	[R].VKFTLAK.[I]	2xTMT6plex [K2; K7]; 1xTMT6plex [N-Term]	1	6	1	Q6ZWN5	Q6ZWN5 [46-52]		1	1494	283.1	293.2	253.8	100.3	104.3	100.2	3	-2.04	53.5045
	132.6	137	138.8	64.7	74.3	52.6	[K].SRLDQELK.[L]	1xTMT6plex [K8]; 1xTMT6plex [N-Term]	1	6	2	Q6ZWN5	Q6ZWN5 [23-30]		1	1446.87	54.6	58.9	55.5	24.5	28.4	19.3	3	-1.38	43.0275
	128.4	106.2	128.2	79.4	73	84.8	[R].RLFEGNALLR.[R]	1xTMT6plex [N-Term]	1	4	2	Q6ZWN5	Q6ZWN5 [70-79]		1	1417.85	19.7	17	19.1	11.2	10.4	11.6	3	0.23	54.5733
	160.6	130.3	144.3	55.8	63.6	45.5	[K].HIDFSLR.[S]	1xTMT6plex [N-Term]	1	1	2	Q6ZWN5	Q6ZWN5 [156-162]		0	1116.64	31.3	26.5	27.3	10	11.5	7.9	3	-3.28	50.3785
135.2	132.8	133.1	67.4	66.1	65.4	P62242	40S ribosomal protein S8 OS=Mus musculus OX=10090 GN=Rps8 PE=1 SV=2	54	14	21	14	208	24.2	10.32	3418.8	3503	3267.5	1567.5	1550.7	1473.6
	Abundances (Grouped): F1, 126	Abundances (Grouped): F1, 127	Abundances (Grouped): F1, 128	Abundances (Grouped): F1, 129	Abundances (Grouped): F1, 130	Abundances (Grouped): F1, 131	Annotated Sequence	Modifications	# Protein Groups	# Proteins	# PSMs	Master Protein Accessions	Positions in Master Proteins	Modifications in Master Proteins	# Missed Cleavages	Theo. MH+ [Da]	Abundance: F1: 126, Sample	Abundance: F1: 127, Sample	Abundance: F1: 128, Sample	Abundance: F1: 129, Sample	Abundance: F1: 130, Sample	Abundance: F1: 131, Sample	Charge (by Search Engine): Sequest HT	DeltaM [ppm] (by Search Engine): Sequest HT	RT [min] (by Search Engine): Sequest HT
	126.8	126.2	134.8	71	75.4	65.8	[K].LTPEEEEILNKK.[R]	2xTMT6plex [K11; K12]; 1xTMT6plex [N-Term]	1	1	1	P62242	P62242 [129-140]		1	2130.26	191.8	199.2	197.9	98.7	105.8	88.7	3	0.94	57.726
	129.2	118.1	119.3	83.1	78.1	72.2	[R].IIDVVYNASNNELVR.[T]	1xTMT6plex [N-Term]	1	1	1	P62242	P62242 [78-92]		0	1948.07	328.8	313.6	294.8	194.4	184.3	163.8	2	-2.94	58.6808
	134.6	132.8	136.3	64.2	64.4	67.9	[R].LDVGNFSWGSECCTRK.[T]	2xCarbamidomethyl [C12; C13]; 1xTMT6plex [K16]; 1xTMT6plex [N-Term]	1	1	1	P62242	P62242 [60-75]		1	2374.17	412.4	424.8	405.5	180.9	183.1	185.4	3	-3.72	57.9985
	123.4	125.5	137.1	80.8	60.9	72.3	[K].LLACIASRPGQCGR.[A]	2xCarbamidomethyl [C4; C12]; 1xTMT6plex [N-Term]	1	1	4	P62242	P62242 [171-184]		0	1787.96	105.5	112	113.8	63.5	48.3	55.1	3	0.15	51.8822
	115.2	124.2	126.3	81.6	73.9	78.8	[R].LDVGNFSWGSECCTR.[K]	2xCarbamidomethyl [C12; C13]; 1xTMT6plex [N-Term]	1	1	1	P62242	P62242 [60-74]		0	2016.91	175.7	197.8	187	114.5	104.6	107.1	2	-0.96	58.5851
	145.5	139.6	143.8	57	59.8	54.4	[K].NCIVLIDSTPYR.[Q]	1xCarbamidomethyl [C2]; 1xTMT6plex [N-Term]	1	1	2	P62242	P62242 [99-110]		0	1679.9	349.3	349.8	335.4	125.9	133.2	116.4	2	-4.48	57.1909
	105.4	117.5	116.4	85.8	85.6	89.3	[R].QWYESHYALPLGR.[K]	1xTMT6plex [N-Term]	1	1	1	P62242	P62242 [111-123]		0	1848.96	45.8	53.3	49.1	34.3	34.5	34.6	3	-5.1	56.9366
	130	107.6	131.3	72.4	82.3	76.4	[R].ADGYVLEGK.[E]	1xTMT6plex [K9]; 1xTMT6plex [N-Term]	1	1	3	P62242	P62242 [185-193]		0	1409.8	239	206.6	234.4	122.5	140.5	125.2	2	-0.53	52.003
	139	136.7	143.3	64.5	59.2	57.3	[K].YELGRPAANTK.[I]	1xTMT6plex [K11]; 1xTMT6plex [N-Term]	1	1	1	P62242	P62242 [27-37]		0	1677.97	144.7	148.6	144.9	61.8	57.2	53.2	3	-3.7	41.8318
	148.4	143.3	133.5	60.2	56.6	58.1	[R].KYELGRPAANTK.[I]	2xTMT6plex [K1; K12]; 1xTMT6plex [N-Term]	1	1	1	P62242	P62242 [26-37]		1	2035.23	231.2	233	202	86.2	81.8	80.7	4	-5.01	40.2018
	144.4	141.7	132.2	61.4	61.1	59.3	[K].ELEFYLRK.[I]	1xTMT6plex [K8]; 1xTMT6plex [N-Term]	1	1	1	P62242	P62242 [194-201]		1	1555.92	744.1	762.1	661.4	290.9	292	272.6	3	-2.76	57.057
	153.7	134.4	147.9	57.3	52.8	53.8	[K].LTPEEEEILNKKR.[S]	2xTMT6plex [K11; K12]; 1xTMT6plex [N-Term]	1	1	1	P62242	P62242 [129-141]		2	2286.36	45.8	41.8	42.8	15.7	14.6	14.3	4	2.21	54.2689
	132.9	147	133.6	63.9	58.7	63.9	[K].ELEFYLR.[K]	1xTMT6plex [N-Term]	1	1	2	P62242	P62242 [194-200]		0	1198.67	298	344.2	290.9	131.9	122.2	127.7	2	0.35	58.5815
	131.6	137.4	136.7	62.1	64.6	67.5	[K].RKYELGRPAANTK.[I]	2xTMT6plex [K2; K13]; 1xTMT6plex [N-Term]	1	1	1	P62242	P62242 [25-37]		2	2191.33	106.7	116.2	107.6	46.3	48.6	48.8	5	-5.37	36.5164
135.1	120	125.8	78.7	73.5	66.8	A2A513	Keratin, type I cytoskeletal 10 OS=Mus musculus OX=10090 GN=Krt10 PE=1 SV=1	10	6	8	4	561	57	5.07	76.9	71.3	69.5	41.2	38.8	33.9
	Abundances (Grouped): F1, 126	Abundances (Grouped): F1, 127	Abundances (Grouped): F1, 128	Abundances (Grouped): F1, 129	Abundances (Grouped): F1, 130	Abundances (Grouped): F1, 131	Annotated Sequence	Modifications	# Protein Groups	# Proteins	# PSMs	Master Protein Accessions	Positions in Master Proteins	Modifications in Master Proteins	# Missed Cleavages	Theo. MH+ [Da]	Abundance: F1: 126, Sample	Abundance: F1: 127, Sample	Abundance: F1: 128, Sample	Abundance: F1: 129, Sample	Abundance: F1: 130, Sample	Abundance: F1: 131, Sample	Charge (by Search Engine): Sequest HT	DeltaM [ppm] (by Search Engine): Sequest HT	RT [min] (by Search Engine): Sequest HT
	129.3	115.7	124.8	81.4	78.3	70.5	[R].QSVEADINGLRR.[V]	1xTMT6plex [N-Term]	2	3	2	P08730; A2A513	P08730 [194-205]; A2A513 [235-246]		1	1586.88	57	53.2	53.4	33	32	27.7	3	-0.87	48.7395
	155	135.1	129.2	69.5	57.1	54.2	[K].QSLEASLAETEGR.[Y]	1xTMT6plex [N-Term]	1	2	2	A2A513	A2A513 [376-388]		0	1619.84	19.9	18.1	16.1	8.2	6.8	6.2	2	2.34	52.8172
							[R].ALEESNYELEGK.[I]	1xTMT6plex [K12]; 1xTMT6plex [N-Term]	1	2	1	A2A513	A2A513 [155-166]		0	1839.97							3	0.31	53.4992
							[R].LENEIQTYR.[S]	1xTMT6plex [N-Term]	1	2	1	A2A513	A2A513 [431-439]		0	1394.75							2	4.13	51.7758
							[R].QSVEADINGLR.[R]	1xTMT6plex [N-Term]	2	3	1	P08730; A2A513	P08730 [194-204]; A2A513 [235-245]		0	1430.78							2	0.81	52.6548
							[K].SEITELRR.[T]	1xTMT6plex [N-Term]	1	2	1	A2A513	A2A513 [352-359]		1	1232.72							3	-4.03	39.1425
135	70.2	97.2	105.5	97	95	F6VCW7	Nuclear factor of-activated T-cells 5 (Fragment) OS=Mus musculus OX=10090 GN=Nfat5 PE=1 SV=1	5	1	1	1	135	14.7	8.91	15.3	8.3	10.7	11	10.2	9.6
	Abundances (Grouped): F1, 126	Abundances (Grouped): F1, 127	Abundances (Grouped): F1, 128	Abundances (Grouped): F1, 129	Abundances (Grouped): F1, 130	Abundances (Grouped): F1, 131	Annotated Sequence	Modifications	# Protein Groups	# Proteins	# PSMs	Master Protein Accessions	Positions in Master Proteins	Modifications in Master Proteins	# Missed Cleavages	Theo. MH+ [Da]	Abundance: F1: 126, Sample	Abundance: F1: 127, Sample	Abundance: F1: 128, Sample	Abundance: F1: 129, Sample	Abundance: F1: 130, Sample	Abundance: F1: 131, Sample	Charge (by Search Engine): Sequest HT	DeltaM [ppm] (by Search Engine): Sequest HT	RT [min] (by Search Engine): Sequest HT
	135	70.2	97.2	105.5	97	95	[R].YLTEGSR.[G]	1xTMT6plex [N-Term]	1	3	1	F6VCW7	F6VCW7 [44-50]		0	1054.57	15.3	8.3	10.7	11	10.2	9.6	2	-1.45	39.4584
134	140.6	142.8	61.5	57.6	63.5	O08715	A-kinase anchor protein 1, mitochondrial OS=Mus musculus OX=10090 GN=Akap1 PE=1 SV=4	20	14	19	14	857	92.1	5.02	905.7	991.5	936.9	382.3	361.2	382.6
	Abundances (Grouped): F1, 126	Abundances (Grouped): F1, 127	Abundances (Grouped): F1, 128	Abundances (Grouped): F1, 129	Abundances (Grouped): F1, 130	Abundances (Grouped): F1, 131	Annotated Sequence	Modifications	# Protein Groups	# Proteins	# PSMs	Master Protein Accessions	Positions in Master Proteins	Modifications in Master Proteins	# Missed Cleavages	Theo. MH+ [Da]	Abundance: F1: 126, Sample	Abundance: F1: 127, Sample	Abundance: F1: 128, Sample	Abundance: F1: 129, Sample	Abundance: F1: 130, Sample	Abundance: F1: 131, Sample	Charge (by Search Engine): Sequest HT	DeltaM [ppm] (by Search Engine): Sequest HT	RT [min] (by Search Engine): Sequest HT
	135.3	152.3	150.6	53.4	54.2	54.2	[R].GWPSPYAASGEK.[A]	1xTMT6plex [K12]; 1xTMT6plex [N-Term]	1	1	2	O08715	O08715 [173-184]		0	1707.91	150.2	176.5	162.4	54.5	55.9	53.7	2	-1.35	53.747
	140.4	162.5	156.3	46.9	45.7	48.4	[R].SESSGNLPSVADTR.[S]	1xTMT6plex [N-Term]	1	1	1	O08715	O08715 [101-114]		0	1648.83	39.4	47.6	42.6	12.1	11.9	12.1	2	1.3	43.5565
	117.8	120.4	136.7	77.3	67.1	80.7	[R].TGATASPSAEALPPK.[T]	1xTMT6plex [K15]; 1xTMT6plex [N-Term]	1	1	3	O08715	O08715 [373-387]		0	1856.05	53.5	57.1	60.3	32.3	28.3	32.7	3	-0.35	45.7536
	128.4	151.2	140.3	61.9	55	63.1	[K].NSAHHISLAPCPPPVTPQR.[Q]	1xCarbamidomethyl [C11]; 1xTMT6plex [N-Term]	1	1	1	O08715	O08715 [408-426]		0	2308.22	34.5	42.4	36.6	15.3	13.7	15.1	4	-0.55	41.9434
	139.1	125.5	145.3	60.7	65.8	63.6	[K].TVAQVHPTSATQPK.[G]	1xTMT6plex [K14]; 1xTMT6plex [N-Term]	1	1	1	O08715	O08715 [333-346]		0	1923.11	34.6	32.6	35.1	13.9	15.2	14.1	3	-0.56	37.866
	131.4	138.8	139.9	67.8	55.5	66.7	[R].CVDKPSTEPLALPR.[T]	1xCarbamidomethyl [C1]; 1xTMT6plex [K4]; 1xTMT6plex [N-Term]	1	1	1	O08715	O08715 [80-93]		0	2041.15	299.9	330.5	309.9	142.2	117.5	135.6	3	1.41	50.6011
	147.3	120.1	156	45.3	68.2	62.9	[K].LPSSFVEPVHSEPVKDEDALEPQVK.[G]	2xTMT6plex [K15; K25]; 1xTMT6plex [N-Term]	1	1	1	O08715	O08715 [256-280]		1	3463.89	49.1	41.8	50.5	13.9	21.1	18.7	4	-0.61	57.345
	136.1	143.2	138.2	59.5	57.3	65.6	[K].KEEYIVGK.[L]	2xTMT6plex [K1; K8]; 1xTMT6plex [N-Term]	1	1	1	O08715	O08715 [248-255]		1	1653.02	183.9	202	181.4	74	71.9	79	3	-0.27	46.6785
							[K].GKEESCVPASQETSLGQDTSDPASTR.[T]	1xCarbamidomethyl [C6]; 1xTMT6plex [K2]; 1xTMT6plex [N-Term]	1	1	2	O08715	O08715 [347-372]		1	3195.55							3	1.21	44.0623
	151.4	126	163.3	53.7	63.6	42	[K].DASFPYEAVER.[C]	1xTMT6plex [N-Term]	1	1	2	O08715	O08715 [149-159]		0	1512.75	19	16.5	19.9	6.2	7.4	4.7	2	0.51	53.7109
							[R].RRSESSGNLPSVADTR.[S]	1xTMT6plex [N-Term]	1	1	1	O08715	O08715 [99-114]		2	1961.04							4	1.08	34.096
							[K].ALNLIGKK.[F]	2xTMT6plex [K7; K8]; 1xTMT6plex [N-Term]	1	1	1	O08715	O08715 [621-628]		1	1544.05							3	-1.6	53.4025
	137.4	140.8	129.9	64.3	65.1	62.6	[K].QVETLK.[V]	1xTMT6plex [K6]; 1xTMT6plex [N-Term]	1	1	1	O08715	O08715 [39-44]		0	1175.74	41.6	44.5	38.2	17.9	18.3	16.9	2	-2.9	43.1628
							[R].RSESSGNLPSVADTR.[S]	1xTMT6plex [N-Term]	1	1	1	O08715	O08715 [100-114]		1	1804.94							3	-2.06	38.0484
133.5	100.4	83.2	91.5	100.7	90.6	Q9CQA1	Trafficking protein particle complex subunit 5 OS=Mus musculus OX=10090 GN=Trappc5 PE=1 SV=1	4	1	1	1	188	20.8	9.66	20	15.7	12.1	12.6	14	12.1
	Abundances (Grouped): F1, 126	Abundances (Grouped): F1, 127	Abundances (Grouped): F1, 128	Abundances (Grouped): F1, 129	Abundances (Grouped): F1, 130	Abundances (Grouped): F1, 131	Annotated Sequence	Modifications	# Protein Groups	# Proteins	# PSMs	Master Protein Accessions	Positions in Master Proteins	Modifications in Master Proteins	# Missed Cleavages	Theo. MH+ [Da]	Abundance: F1: 126, Sample	Abundance: F1: 127, Sample	Abundance: F1: 128, Sample	Abundance: F1: 129, Sample	Abundance: F1: 130, Sample	Abundance: F1: 131, Sample	Charge (by Search Engine): Sequest HT	DeltaM [ppm] (by Search Engine): Sequest HT	RT [min] (by Search Engine): Sequest HT
	133.5	100.4	83.2	91.5	100.7	90.6	[K].FEEAVIAR.[D]	1xTMT6plex [N-Term]	1	1	1	Q9CQA1	Q9CQA1 [174-181]		0	1163.66	20	15.7	12.1	12.6	14	12.1	2	-1.09	52.0407
133.5	131	132.4	68.6	66.8	67.7	P41105	60S ribosomal protein L28 OS=Mus musculus OX=10090 GN=Rpl28 PE=1 SV=2	58	13	24	13	137	15.7	12.02	3343.3	3423.6	3218.2	1579.3	1553	1511.8
	Abundances (Grouped): F1, 126	Abundances (Grouped): F1, 127	Abundances (Grouped): F1, 128	Abundances (Grouped): F1, 129	Abundances (Grouped): F1, 130	Abundances (Grouped): F1, 131	Annotated Sequence	Modifications	# Protein Groups	# Proteins	# PSMs	Master Protein Accessions	Positions in Master Proteins	Modifications in Master Proteins	# Missed Cleavages	Theo. MH+ [Da]	Abundance: F1: 126, Sample	Abundance: F1: 127, Sample	Abundance: F1: 128, Sample	Abundance: F1: 129, Sample	Abundance: F1: 130, Sample	Abundance: F1: 131, Sample	Charge (by Search Engine): Sequest HT	DeltaM [ppm] (by Search Engine): Sequest HT	RT [min] (by Search Engine): Sequest HT
	158.4	151.7	151.7	51	45.8	41.4	[R].NKQTYSTEPNNLK.[A]	2xTMT6plex [K2; K13]; 1xTMT6plex [N-Term]	1	1	1	P41105	P41105 [21-33]		1	2224.25	329.3	329.2	306.4	97.6	88.4	76.7	3	-3.19	42.1051
	134.2	141.3	132.3	70	64.6	57.7	[K].QTYSTEPNNLK.[A]	1xTMT6plex [K11]; 1xTMT6plex [N-Term]	1	1	1	P41105	P41105 [23-33]		0	1752.95	74.8	82.2	71.6	35.9	33.4	28.7	2	-1.15	43.9786
	139.3	138.4	135.7	55.6	58.8	72.3	[R].KTVGVEPAADGK.[G]	2xTMT6plex [K1; K12]; 1xTMT6plex [N-Term]	1	1	1	P41105	P41105 [47-58]		1	1859.12	190.5	197.6	180.2	69.9	74.6	88.2	3	-1.9	41.6887
	143.3	133	140.7	62.7	62.8	57.5	[K].TVGVEPAADGKGVVVVMK.[R]	2xTMT6plex [K11; K18]; 1xTMT6plex [N-Term]	1	1	1	P41105	P41105 [48-65]		1	2443.46	243.7	236	232.3	98	99.1	87.2	3	-6.9	57.8361
	134.9	133.6	132.9	65.8	65.8	67	[R].NCSSFLIKR.[N]	1xCarbamidomethyl [C2]; 1xTMT6plex [K8]; 1xTMT6plex [N-Term]	1	1	3	P41105	P41105 [12-20]		1	1582.91	561.9	580.6	537.5	252	254.2	248.9	3	-3.79	46.7752
	133.4	135.3	133.5	62.7	61.4	73.8	[K].TVGVEPAADGK.[G]	1xTMT6plex [K11]; 1xTMT6plex [N-Term]	1	1	2	P41105	P41105 [48-58]		0	1501.86	56	59.3	54.4	24.2	23.9	27.6	2	-1.66	43.5228
	109.8	108.7	113	93.5	87	88	[-].MSAHLQWMVVR.[N]	1xTMT6plex [N-Term]; 1xMet-loss+Acetyl [N-Term]	1	1	3	P41105	P41105 [1-11]	P41105 1xMet-loss+Acetyl [N-Term]	0	1497.82	197.4	204.1	197.3	154.6	145.2	141.1	3	-2.31	55.3535
	129.2	123.8	128.8	72.6	72.1	73.5	[R].NCSSFLIK.[R]	1xCarbamidomethyl [C2]; 1xTMT6plex [K8]; 1xTMT6plex [N-Term]	1	1	1	P41105	P41105 [12-19]		0	1426.81	864.3	864.6	836.5	446.5	447.5	438.1	2	-2.97	53.8399
	112	111.7	123.3	75.8	92.2	84.9	[R].YNGLIHR.[K]	1xTMT6plex [N-Term]	1	1	1	P41105	P41105 [40-46]		0	1101.64	31.8	33.1	34	19.8	24.3	21.5	3	-4.69	40.5973
	137.5	137.1	131.9	66.6	64.5	62.5	[R].YNGLIHRK.[T]	1xTMT6plex [K8]; 1xTMT6plex [N-Term]	1	1	2	P41105	P41105 [40-47]		1	1458.89	162.7	169.3	151.5	72.5	70.8	65.9	4	-2.13	39.8396
	129.4	130.4	129.7	71.3	67.9	71.4	[R].ATLSSIR.[H]	1xTMT6plex [N-Term]	1	2	2	P41105	P41105 [88-94]		0	976.599	354.3	372.9	344.9	179.5	172.5	174.2	2	-3.22	42.3176
	134.4	137	135.5	68.4	62.5	62.1	[R].KPATSYVR.[T]	1xTMT6plex [K1]; 1xTMT6plex [N-Term]	1	2	3	P41105	P41105 [72-79]		0	1379.84	262.4	279.1	256.9	122.9	113.3	108.1	3	0.81	37.551
	134.7	141.8	143.7	60.9	59.3	59.6	[K].YRPDLR.[M]	1xTMT6plex [N-Term]	1	2	3	P41105	P41105 [102-107]		0	1048.61	14.2	15.6	14.7	5.9	5.8	5.6	3	-3.78	36.1674
133.4	126.9	130.2	72.9	66.3	70.4	Q9JIB0	Ran guanine nucleotide release factor OS=Mus musculus OX=10090 GN=Rangrf PE=1 SV=1	16	3	4	3	185	20.4	5.45	249	247.2	236	125.1	114.8	117.1
	Abundances (Grouped): F1, 126	Abundances (Grouped): F1, 127	Abundances (Grouped): F1, 128	Abundances (Grouped): F1, 129	Abundances (Grouped): F1, 130	Abundances (Grouped): F1, 131	Annotated Sequence	Modifications	# Protein Groups	# Proteins	# PSMs	Master Protein Accessions	Positions in Master Proteins	Modifications in Master Proteins	# Missed Cleavages	Theo. MH+ [Da]	Abundance: F1: 126, Sample	Abundance: F1: 127, Sample	Abundance: F1: 128, Sample	Abundance: F1: 129, Sample	Abundance: F1: 130, Sample	Abundance: F1: 131, Sample	Charge (by Search Engine): Sequest HT	DeltaM [ppm] (by Search Engine): Sequest HT	RT [min] (by Search Engine): Sequest HT
	135.7	129.3	130	72.4	64.5	68.2	[R].GCCQDAWSLSGK.[Q]	2xCarbamidomethyl [C2; C3]; 1xTMT6plex [K12]; 1xTMT6plex [N-Term]	1	1	2	Q9JIB0	Q9JIB0 [97-108]		0	1826.89	195.2	194.2	181.6	95.8	86.1	87.5	2	-1.54	53.5765
	143.4	134	138.6	56.7	65.7	61.7	[K].DVTLHQALLR.[L]	1xTMT6plex [N-Term]	1	1	1	Q9JIB0	Q9JIB0 [121-130]		0	1394.83	40.7	39.7	38.2	14.8	17.3	15.6	3	-1.15	48.452
	91.1	88.6	116	109.6	85.4	109.2	[R].YHFEDVGR.[V]	1xTMT6plex [N-Term]	1	1	1	Q9JIB0	Q9JIB0 [66-73]		0	1251.63	13.1	13.3	16.2	14.5	11.4	14	3	-0.94	44.3914
133.3	136.3	133	67.7	64.9	64.8	Q2XU92	Long-chain-fatty-acid--CoA ligase ACSBG2 OS=Mus musculus OX=10090 GN=Acsbg2 PE=1 SV=1	16	10	16	9	667	74.3	8.37	1626.4	1734.9	1574.7	759.3	734.9	705.1
	Abundances (Grouped): F1, 126	Abundances (Grouped): F1, 127	Abundances (Grouped): F1, 128	Abundances (Grouped): F1, 129	Abundances (Grouped): F1, 130	Abundances (Grouped): F1, 131	Annotated Sequence	Modifications	# Protein Groups	# Proteins	# PSMs	Master Protein Accessions	Positions in Master Proteins	Modifications in Master Proteins	# Missed Cleavages	Theo. MH+ [Da]	Abundance: F1: 126, Sample	Abundance: F1: 127, Sample	Abundance: F1: 128, Sample	Abundance: F1: 129, Sample	Abundance: F1: 130, Sample	Abundance: F1: 131, Sample	Charge (by Search Engine): Sequest HT	DeltaM [ppm] (by Search Engine): Sequest HT	RT [min] (by Search Engine): Sequest HT
	114.2	119.8	120.4	82.1	79.3	84.2	[K].ANQCAVILYTSGTTGTPK.[G]	1xCarbamidomethyl [C4]; 1xTMT6plex [K18]; 1xTMT6plex [N-Term]	1	1	1	Q2XU92	Q2XU92 [218-235]		0	2340.26	255.6	279.9	261.6	169.1	164.8	168	3	2.06	54.4378
	152.4	153.6	153.6	45.9	51.4	43.1	[K].DFSIQGGELGPTSK.[L]	1xTMT6plex [K14]; 1xTMT6plex [N-Term]	1	1	2	Q2XU92	Q2XU92 [634-647]		0	1894.03	129.3	136	126.5	35.8	40.5	32.6	2	2.17	56.4312
	142.1	133.4	132.9	68.1	61.2	62.3	[K].KAEDLERGTDATSAVPR.[L]	1xTMT6plex [K1]; 1xTMT6plex [N-Term]	1	1	2	Q2XU92	Q2XU92 [6-22]		2	2274.25	66.5	65.2	60.4	29.3	26.6	26	4	-1.22	43.4757
	144.5	156	154.4	48.1	46.5	50.4	[K].EGVGEVCMWGR.[H]	1xCarbamidomethyl [C7]; 1xTMT6plex [N-Term]	1	1	1	Q2XU92	Q2XU92 [459-469]		0	1508.72	40.2	45.3	41.7	12.3	12	12.5	2	-1.66	55.5785
	128.1	130.5	125.3	73.8	70.4	71.8	[R].FSAYPALASK.[N]	1xTMT6plex [K10]; 1xTMT6plex [N-Term]	1	1	1	Q2XU92	Q2XU92 [60-69]		0	1512.88	644.4	685	612	341.2	328.6	322	2	-6.4	56.7111
	149	151.1	148.5	55.3	49.9	46.3	[K].NMLYNQNK.[E]	1xTMT6plex [K8]; 1xTMT6plex [N-Term]	1	1	1	Q2XU92	Q2XU92 [451-458]		0	1482.81	441.2	467	427.2	150.6	137.1	122.2	2	-4.28	45.4055
							[K].AQIDSMYLS.[-]	1xOxidation [M6]; 1xTMT6plex [N-Term]	1	1	2	Q2XU92	Q2XU92 [659-667]		0	1272.63							2	0.07	53.8292
							[K].AQIDSMYLS.[-]	1xTMT6plex [N-Term]	1	1	1	Q2XU92	Q2XU92 [659-667]		0	1256.64							2	-0.07	58.4415
							[K].KAFAWAK.[M]	2xTMT6plex [K1; K7]; 1xTMT6plex [N-Term]	1	1	1	Q2XU92	Q2XU92 [344-350]		1	1508.96							3	-1.66	53.4411
	155	161.9	146.6	37.6	44.4	54.5	[K].EGVGEVCMWGR.[H]	1xCarbamidomethyl [C7]; 1xOxidation [M8]; 1xTMT6plex [N-Term]	1	1	2	Q2XU92	Q2XU92 [459-469]		0	1524.71	23.3	25.4	21.4	5.2	6.2	7.3	2	2.02	50.9145
	127.7	138.5	136.1	62.6	68.7	66.4	[RK].LSVEAK.[S]	1xTMT6plex [K6]; 1xTMT6plex [N-Term]	2	2	1	Q32M07; Q2XU92	Q32M07 [99-104]; Q2XU92 [574-579]		0	1104.7	118.4	134	122.5	53.4	59.1	54.9	2	-1.89	45.2503
	115.7	133.1	109.9	76.7	91.9	72.7	[R].DIPMNYR.[M]	1xTMT6plex [N-Term]	1	1	1	Q2XU92	Q2XU92 [366-372]		0	1137.59	25.9	31.1	23.9	15.8	19.1	14.5	2	-1.34	47.961
133.2	132	136.6	66.9	72	59.4	Q9CQ40	39S ribosomal protein L49, mitochondrial OS=Mus musculus OX=10090 GN=Mrpl49 PE=1 SV=1	8	1	1	1	166	19.1	9.5	113.3	117.2	112.8	52.3	56.8	45
	Abundances (Grouped): F1, 126	Abundances (Grouped): F1, 127	Abundances (Grouped): F1, 128	Abundances (Grouped): F1, 129	Abundances (Grouped): F1, 130	Abundances (Grouped): F1, 131	Annotated Sequence	Modifications	# Protein Groups	# Proteins	# PSMs	Master Protein Accessions	Positions in Master Proteins	Modifications in Master Proteins	# Missed Cleavages	Theo. MH+ [Da]	Abundance: F1: 126, Sample	Abundance: F1: 127, Sample	Abundance: F1: 128, Sample	Abundance: F1: 129, Sample	Abundance: F1: 130, Sample	Abundance: F1: 131, Sample	Charge (by Search Engine): Sequest HT	DeltaM [ppm] (by Search Engine): Sequest HT	RT [min] (by Search Engine): Sequest HT
	133.2	132	136.6	66.9	72	59.4	[K].TPITQVNEVTGTLR.[I]	1xTMT6plex [N-Term]	1	1	1	Q9CQ40	Q9CQ40 [135-148]		0	1758	113.3	117.2	112.8	52.3	56.8	45	2	-6.99	56.1158
133	132.2	129.6	68.1	68.8	68.3	Q9D8N0	Elongation factor 1-gamma OS=Mus musculus OX=10090 GN=Eef1g PE=1 SV=3	74	28	75	28	437	50	6.74	5513.5	5717	5215.2	2596	2647.1	2523.3
	Abundances (Grouped): F1, 126	Abundances (Grouped): F1, 127	Abundances (Grouped): F1, 128	Abundances (Grouped): F1, 129	Abundances (Grouped): F1, 130	Abundances (Grouped): F1, 131	Annotated Sequence	Modifications	# Protein Groups	# Proteins	# PSMs	Master Protein Accessions	Positions in Master Proteins	Modifications in Master Proteins	# Missed Cleavages	Theo. MH+ [Da]	Abundance: F1: 126, Sample	Abundance: F1: 127, Sample	Abundance: F1: 128, Sample	Abundance: F1: 129, Sample	Abundance: F1: 130, Sample	Abundance: F1: 131, Sample	Charge (by Search Engine): Sequest HT	DeltaM [ppm] (by Search Engine): Sequest HT	RT [min] (by Search Engine): Sequest HT
							[R].GSTPEAAAQVVQWVSFADSDIVPPASTWVFPTLGIMHHNK.[Q]	1xOxidation [M36]; 1xTMT6plex [K40]; 1xTMT6plex [N-Term]	1	1	2	Q9D8N0	Q9D8N0 [86-125]		0	4765.45							4	0.87	59.2668
	127	142	130.9	63.6	72.8	63.7	[R].GSTPEAAAQVVQWVSFADSDIVPPASTWVFPTLGIMHHNK.[Q]	1xTMT6plex [K40]; 1xTMT6plex [N-Term]	1	1	2	Q9D8N0	Q9D8N0 [86-125]		0	4749.45	236.7	276.3	236.9	109.1	125.9	105.9	4	-5.56	59.2993
	136.3	139.8	144.9	63.4	56.7	58.8	[K].KAAAPAPEEEMDECEQALAAEPK.[A]	1xCarbamidomethyl [C14]; 1xOxidation [M11]; 2xTMT6plex [K1; K23]; 1xTMT6plex [N-Term]	1	1	3	Q9D8N0	Q9D8N0 [253-275]		1	3188.61	99.3	106.3	102.5	42.5	38.3	38.2	4	0.77	49.7378
	114.4	106.7	131.4	82.7	77.5	87.3	[K].KAAAPAPEEEMDECEQALAAEPK.[A]	1xCarbamidomethyl [C14]; 2xTMT6plex [K1; K23]; 1xTMT6plex [N-Term]	1	1	3	Q9D8N0	Q9D8N0 [253-275]		1	3172.61	19.1	18.6	21.3	12.7	12	13	4	-0.17	55.6778
	101.1	102.4	98	94.2	106.9	97.4	[R].FPEELTQTFMSCNLITGMFQR.[L]	1xCarbamidomethyl [C12]; 1xTMT6plex [N-Term]	1	1	1	Q9D8N0	Q9D8N0 [328-348]		0	2779.35	93.9	99.3	88.4	80.5	92.1	80.6	3	-3.8	59.5758
	156.3	143.8	142.6	53.4	55.7	48.2	[K].QATENAKEEVK.[R]	2xTMT6plex [K7; K11]; 1xTMT6plex [N-Term]	1	1	1	Q9D8N0	Q9D8N0 [126-136]		1	1934.12	189.7	182.1	168	59.6	62.7	52.1	3	-3.65	39.3186
	120	115	115.8	81.5	84.3	83.4	[K].RILGLLDTHLK.[T]	1xTMT6plex [K11]; 1xTMT6plex [N-Term]	1	1	2	Q9D8N0	Q9D8N0 [137-147]		1	1737.12	232.6	232.7	218	145.4	151.7	144.1	4	-6.59	57.2828
	123.8	126.2	126.3	71.2	78.8	73.7	[R].KYSNEDTLSVALPYFWEHFDK.[D]	2xTMT6plex [K1; K21]; 1xTMT6plex [N-Term]	1	1	1	Q9D8N0	Q9D8N0 [296-316]		1	3276.72	270.1	287.2	267.5	142.8	159.4	143.3	4	-1.56	58.8097
	122	120.3	121.4	77	78.7	80.5	[K].ALIAAQYSGAQVR.[V]	1xTMT6plex [N-Term]	1	1	8	Q9D8N0	Q9D8N0 [18-30]		0	1576.9	467	480.7	451.2	271.2	279.5	274.7	2	-0.36	51.6352
	139.5	130.2	142.3	54.3	71.6	62.1	[K].LDPGSEETQTLVR.[E]	1xTMT6plex [N-Term]	1	1	2	Q9D8N0	Q9D8N0 [402-414]		0	1673.89	168.9	164.6	167.4	60.5	80.5	67	2	2	51.1124
	172	135.1	118.5	59.1	55.2	60.1	[K].AAAPAPEEEMDECEQALAAEPK.[A]	1xCarbamidomethyl [C13]; 1xTMT6plex [K22]; 1xTMT6plex [N-Term]	1	1	1	Q9D8N0	Q9D8N0 [254-275]		0	2815.35	160.4	131.5	107.3	50.7	47.8	50	3	-2.85	57.1061
	133.5	140.5	126.5	69.2	66.5	63.7	[K].AAAPAPEEEMDECEQALAAEPK.[A]	1xCarbamidomethyl [C13]; 1xOxidation [M10]; 1xTMT6plex [K22]; 1xTMT6plex [N-Term]	1	1	2	Q9D8N0	Q9D8N0 [254-275]		0	2831.35	143.4	157.6	132	68.4	66.3	61	3	-3.03	50.7264
	110.2	150.1	128.2	77.8	67.1	66.6	[R].KFPAGKVPAFEGDDGFCVFESNAIAYYVSNEELR.[G]	1xCarbamidomethyl [C17]; 2xTMT6plex [K1; K6]; 1xTMT6plex [N-Term]	1	1	4	Q9D8N0	Q9D8N0 [52-85]		2	4514.29	15.4	21.9	17.4	10	8.7	8.3	4	1.95	58.9267
	135.3	134.4	130.7	66.8	70.5	62.3	[R].KLDPGSEETQTLVR.[E]	1xTMT6plex [K1]; 1xTMT6plex [N-Term]	1	1	3	Q9D8N0	Q9D8N0 [401-414]		1	2031.15	172.4	178.7	161.7	78.3	83.3	70.8	3	-0.59	48.2751
	97.9	98.9	105.8	97.8	95.2	104.5	[R].VLSAPPHFHFGQTNR.[T]	1xTMT6plex [N-Term]	1	1	4	Q9D8N0	Q9D8N0 [31-45]		0	1937.03	138.8	146.3	145.6	127.5	125.3	132.1	4	-1.56	52.3634
	154.4	159.2	144.4	48.9	46.3	46.7	[K].KFAESQPK.[K]	2xTMT6plex [K1; K8]; 1xTMT6plex [N-Term]	1	1	2	Q9D8N0	Q9D8N0 [220-227]		1	1621.99	350.1	377	318.1	102	97.5	94.5	3	-7.18	39.6196
	149.5	140.5	139.8	58.4	57.2	54.6	[K].STFVLDEFKR.[K]	1xTMT6plex [K9]; 1xTMT6plex [N-Term]	1	1	2	Q9D8N0	Q9D8N0 [286-295]		1	1699.98	648	635.8	588.6	232.7	229.9	211.1	3	-3.21	57.1493
							[R].VTLADITVVCTLLWLYK.[Q]	1xCarbamidomethyl [C10]; 1xTMT6plex [K17]; 1xTMT6plex [N-Term]	1	1	3	Q9D8N0	Q9D8N0 [157-173]		0	2466.44							3	0.87	60.2632
	155.9	161.9	152.6	44.7	44.5	40.3	[K].FAESQPKKDTPR.[K]	2xTMT6plex [K7; K8]; 1xTMT6plex [N-Term]	1	1	1	Q9D8N0	Q9D8N0 [221-232]		2	2091.22	191.8	207.8	182.3	50.6	50.8	44.2	4	-6.75	38.8639
	129	130.2	108.3	71.5	70.8	90.1	[-].MAAGTLYTYPENWR.[A]	1xTMT6plex [N-Term]; 1xMet-loss [N-Term]	1	1	1	Q9D8N0	Q9D8N0 [1-14]	Q9D8N0 1xMet-loss [N-Term]	0	1770.9	26.5	27.9	21.6	13.5	13.5	16.5	2	-1.12	57.5693
	138.2	127.7	148.1	71.3	46.3	68.4	[K].QATENAKEEVKR.[I]	2xTMT6plex [K7; K11]; 1xTMT6plex [N-Term]	1	1	1	Q9D8N0	Q9D8N0 [126-137]		2	2090.22	39.2	37.8	40.8	18.6	12.2	17.3	4	-4.04	36.8431
	133.5	142.2	125.9	68.1	62.2	68.1	[R].AILGEVK.[L]	1xTMT6plex [K7]; 1xTMT6plex [N-Term]	1	1	2	Q9D8N0	Q9D8N0 [202-208]		0	1187.78	416.5	462.9	381.5	195.4	180	189.5	2	-1.36	53.08
	128.6	134.3	124.7	74.4	70.6	67.5	[K].DPFAHLPK.[S]	1xTMT6plex [K8]; 1xTMT6plex [N-Term]	1	1	1	Q9D8N0	Q9D8N0 [278-285]		0	1382.82	141.4	154.1	133.1	75.2	72	66.1	3	-4.63	52.466
							[R].EYFSWEGTFQHVGK.[A]	1xTMT6plex [K14]; 1xTMT6plex [N-Term]	1	1	5	Q9D8N0	Q9D8N0 [415-428]		0	2173.11							3	-0.37	62.1096
	133	135	118.6	69.6	67.5	76.4	[K].FAESQPK.[K]	1xTMT6plex [K7]; 1xTMT6plex [N-Term]	1	1	3	Q9D8N0	Q9D8N0 [221-227]		0	1264.73	185.5	196.6	160.6	89.3	87.4	95	2	-1.41	42.1257
	130.4	127.7	136.4	67.3	69.1	69.1	[R].QAFPNTNR.[W]	1xTMT6plex [N-Term]	1	1	9	Q9D8N0	Q9D8N0 [182-189]		0	1176.63	384.3	392.7	390.1	182.3	188.9	181.4	2	-1.09	36.2277
							[K].MAQFDAK.[K]	1xTMT6plex [K7]; 1xTMT6plex [N-Term]	1	1	1	Q9D8N0	Q9D8N0 [213-219]		0	1268.71							2	-3.13	49.6114
							[K].AKDPFAHLPK.[S]	2xTMT6plex [K2; K10]; 1xTMT6plex [N-Term]	1	1	1	Q9D8N0	Q9D8N0 [276-285]		1	1811.11							4	-3.42	50.5207
	142.9	130.8	131.2	64.2	68.2	62.7	[R].TFLVGER.[V]	1xTMT6plex [N-Term]	1	1	1	Q9D8N0	Q9D8N0 [150-156]		0	1050.61	267.2	255.3	238.3	110.5	118.3	104.6	2	-4.56	49.8215
	125.7	128.8	133.3	71.4	69.6	71.2	[K].QVLEPSFR.[Q]	1xTMT6plex [N-Term]	1	1	2	Q9D8N0	Q9D8N0 [174-181]		0	1204.69	151.9	162.5	156.4	79.4	78	76.7	2	5.76	50.2677
	117.3	119.6	126.9	78.7	77.1	80.4	[R].TPEFLRK.[F]	1xTMT6plex [K7]; 1xTMT6plex [N-Term]	1	1	1	Q9D8N0	Q9D8N0 [46-52]		1	1348.84	303.4	322.8	318.6	187.3	185.1	185.3	3	-7.02	47.3419
132.9	129.3	129.5	71	67.8	69.6	Q9D572	UBX domain-containing protein 11 OS=Mus musculus OX=10090 GN=Ubxn11 PE=1 SV=1	27	12	14	12	484	54.8	4.94	832.8	845.3	787.6	409.1	394.1	388.6
	Abundances (Grouped): F1, 126	Abundances (Grouped): F1, 127	Abundances (Grouped): F1, 128	Abundances (Grouped): F1, 129	Abundances (Grouped): F1, 130	Abundances (Grouped): F1, 131	Annotated Sequence	Modifications	# Protein Groups	# Proteins	# PSMs	Master Protein Accessions	Positions in Master Proteins	Modifications in Master Proteins	# Missed Cleavages	Theo. MH+ [Da]	Abundance: F1: 126, Sample	Abundance: F1: 127, Sample	Abundance: F1: 128, Sample	Abundance: F1: 129, Sample	Abundance: F1: 130, Sample	Abundance: F1: 131, Sample	Charge (by Search Engine): Sequest HT	DeltaM [ppm] (by Search Engine): Sequest HT	RT [min] (by Search Engine): Sequest HT
							[R].QGPHDSELMASMTR.[K]	1xTMT6plex [N-Term]	1	2	1	Q9D572	Q9D572 [66-79]		0	1788.86							3	-1.11	45.9561
							[R].QEELETQCIQLQR.[Q]	1xCarbamidomethyl [C8]; 1xTMT6plex [N-Term]	1	2	2	Q9D572	Q9D572 [124-136]		0	1903.97							3	-0.72	51.034
	167.9	136.5	138.5	62.6	44.6	49.9	[K].TVSENDERDWMK.[A]	1xTMT6plex [K12]; 1xTMT6plex [N-Term]	1	1	1	Q9D572	Q9D572 [166-177]		1	1967.99	69.4	58.9	55.6	23.8	17.1	18.4	3	0.98	50.1318
	141.7	154.6	138.5	54.1	58.3	52.8	[R].IQEIIVETPALASER.[Q]	1xTMT6plex [N-Term]	1	3	1	Q9D572	Q9D572 [365-379]		0	1898.08	66.6	75.8	63.2	23.4	25.4	22.1	2	-0.68	58.5928
	123.4	123.9	114.8	74.3	66.9	96.6	[R].KVPLESESVNPGRR.[G]	1xTMT6plex [K1]; 1xTMT6plex [N-Term]	1	2	1	Q9D572	Q9D572 [13-26]		2	2026.18	94.4	98.9	85.3	52.3	47.5	65.9	4	-4.26	40.734
	177.6	142.1	124.8	61.4	47.8	46.3	[R].QGEVIDIR.[G]	1xTMT6plex [N-Term]	1	3	1	Q9D572	Q9D572 [341-348]		0	1158.67	51.6	43.1	35.2	16.4	12.9	12	2	2.14	46.7827
	123.2	128.7	133.5	72.6	69.6	72.4	[R].MTAEQFLNR.[L]	1xTMT6plex [N-Term]	1	3	1	Q9D572	Q9D572 [325-333]		0	1338.7	135.5	147.7	142.6	73.4	71	71	2	-6.9	55.1326
	150	143.4	146.7	49.4	50.5	60.1	[R].QIGEMER.[F]	1xTMT6plex [N-Term]	1	2	1	Q9D572	Q9D572 [137-143]		0	1091.57	53.5	53.4	50.8	16.2	16.7	19.1	2	0.37	39.7499
	165	160.2	154.3	44.9	40.9	34.7	[R].KVTDRVEETSGSR.[M]	1xTMT6plex [K1]; 1xTMT6plex [N-Term]	1	3	1	Q9D572	Q9D572 [312-324]		2	1922.07	30.4	30.8	27.6	7.6	7	5.7	4	-3.12	34.353
	122	118.6	123.9	80.2	80.3	75.1	[R].TLEPIPLK.[V]	1xTMT6plex [K8]; 1xTMT6plex [N-Term]	1	2	1	Q9D572	Q9D572 [226-233]		0	1368.89	304.5	308.9	300.2	184.2	186.1	167	2	-2.42	56.895
							[K].VPLESESVNPGRR.[G]	1xTMT6plex [N-Term]	1	2	1	Q9D572	Q9D572 [14-26]		1	1668.92							3	-3.95	43.224
							[R].GPIRDTLQNCCPMPAR.[I]	2xCarbamidomethyl [C10; C11]; 1xTMT6plex [N-Term]	1	3	1	Q9D572	Q9D572 [349-364]		1	2115.05							3	-1.5	46.1447
	141.8	140.4	147.2	67.7	59.1	43.8	[K].TVSENDERDWMK.[A]	1xOxidation [M11]; 1xTMT6plex [K12]; 1xTMT6plex [N-Term]	1	1	1	Q9D572	Q9D572 [166-177]		1	1983.98	26.9	27.8	27.1	11.8	10.4	7.4	3	-2.53	44.9372
132.8	131	128.9	67.6	68.6	71.1	B0QZT2	Dehydrogenase/reductase SDR family member 13 OS=Mus musculus OX=10090 GN=Dhrs13 PE=1 SV=1	18	5	5	5	326	35.7	7.17	109.1	112.3	102.8	51.1	52.3	52.1
	Abundances (Grouped): F1, 126	Abundances (Grouped): F1, 127	Abundances (Grouped): F1, 128	Abundances (Grouped): F1, 129	Abundances (Grouped): F1, 130	Abundances (Grouped): F1, 131	Annotated Sequence	Modifications	# Protein Groups	# Proteins	# PSMs	Master Protein Accessions	Positions in Master Proteins	Modifications in Master Proteins	# Missed Cleavages	Theo. MH+ [Da]	Abundance: F1: 126, Sample	Abundance: F1: 127, Sample	Abundance: F1: 128, Sample	Abundance: F1: 129, Sample	Abundance: F1: 130, Sample	Abundance: F1: 131, Sample	Charge (by Search Engine): Sequest HT	DeltaM [ppm] (by Search Engine): Sequest HT	RT [min] (by Search Engine): Sequest HT
							[R].YFANCHVEEVSPAARDDQAAQR.[L]	1xCarbamidomethyl [C5]; 1xTMT6plex [N-Term]	1	2	1	B0QZT2	B0QZT2 [231-252]		1	2763.31							4	-1.58	45.9224
							[R].YFANCHVEEVSPAAR.[D]	1xCarbamidomethyl [C5]; 1xTMT6plex [N-Term]	1	2	1	B0QZT2	B0QZT2 [231-245]		0	1978.96							3	2.61	48.1641
							[K].TTVSGPSHSYQGSQDLSK.[L]	1xTMT6plex [K18]; 1xTMT6plex [N-Term]	1	2	1	B0QZT2	B0QZT2 [295-312]		0	2337.21							3	-0.22	41.9466
	132.8	131	128.9	67.6	68.6	71.1	[-].MTALELARR.[G]	1xTMT6plex [N-Term]; 1xMet-loss [N-Term]	1	1	1	B0QZT2	B0QZT2 [1-9]	B0QZT2 1xMet-loss [N-Term]	1	1158.72	109.1	112.3	102.8	51.1	52.3	52.1	2	-8.87	53.0843
							[R].GEAAAFDLR.[Q]	1xTMT6plex [N-Term]	1	3	1	B0QZT2	B0QZT2 [23-31]		0	1178.64							2	2.63	50.9827
132.7	109.7	105	96.4	91.1	65	A0A087WNR4	Testis-expressed protein 35 OS=Mus musculus OX=10090 GN=Tex35 PE=4 SV=1	4	1	1	1	209	24.5	6.58	19	16.4	14.6	12.7	12.1	8.3
	Abundances (Grouped): F1, 126	Abundances (Grouped): F1, 127	Abundances (Grouped): F1, 128	Abundances (Grouped): F1, 129	Abundances (Grouped): F1, 130	Abundances (Grouped): F1, 131	Annotated Sequence	Modifications	# Protein Groups	# Proteins	# PSMs	Master Protein Accessions	Positions in Master Proteins	Modifications in Master Proteins	# Missed Cleavages	Theo. MH+ [Da]	Abundance: F1: 126, Sample	Abundance: F1: 127, Sample	Abundance: F1: 128, Sample	Abundance: F1: 129, Sample	Abundance: F1: 130, Sample	Abundance: F1: 131, Sample	Charge (by Search Engine): Sequest HT	DeltaM [ppm] (by Search Engine): Sequest HT	RT [min] (by Search Engine): Sequest HT
	132.7	109.7	105	96.4	91.1	65	[K].EMQQDMDEK.[M]	1xTMT6plex [K9]; 1xTMT6plex [N-Term]	1	6	1	A0A087WNR4	A0A087WNR4 [91-99]		0	1611.78	19	16.4	14.6	12.7	12.1	8.3	2	1.17	43.5834
132.6	132.9	128.2	63.3	86.8	56.2	A0A1B0GSB3	Predicted pseudogene 3880 OS=Mus musculus OX=10090 GN=Gm3880 PE=4 SV=1	14	1	1	1	72	8.1	12.21	19.6	20.5	18.4	8.6	11.9	7.4
	Abundances (Grouped): F1, 126	Abundances (Grouped): F1, 127	Abundances (Grouped): F1, 128	Abundances (Grouped): F1, 129	Abundances (Grouped): F1, 130	Abundances (Grouped): F1, 131	Annotated Sequence	Modifications	# Protein Groups	# Proteins	# PSMs	Master Protein Accessions	Positions in Master Proteins	Modifications in Master Proteins	# Missed Cleavages	Theo. MH+ [Da]	Abundance: F1: 126, Sample	Abundance: F1: 127, Sample	Abundance: F1: 128, Sample	Abundance: F1: 129, Sample	Abundance: F1: 130, Sample	Abundance: F1: 131, Sample	Charge (by Search Engine): Sequest HT	DeltaM [ppm] (by Search Engine): Sequest HT	RT [min] (by Search Engine): Sequest HT
	132.6	132.9	128.2	63.3	86.8	56.2	[R].DTREPAPPTR.[S]	1xTMT6plex [N-Term]	1	1	1	A0A1B0GSB3	A0A1B0GSB3 [37-46]		1	1368.74	19.6	20.5	18.4	8.6	11.9	7.4	3	-2.74	28.3213
132.6	123.8	136.1	62.1	82.2	63.1	Q91WK5	Glycine cleavage system H protein, mitochondrial OS=Mus musculus OX=10090 GN=Gcsh PE=1 SV=2	4	1	1	1	170	18.6	4.75	31.8	31	31.7	13.7	18.3	13.5
	Abundances (Grouped): F1, 126	Abundances (Grouped): F1, 127	Abundances (Grouped): F1, 128	Abundances (Grouped): F1, 129	Abundances (Grouped): F1, 130	Abundances (Grouped): F1, 131	Annotated Sequence	Modifications	# Protein Groups	# Proteins	# PSMs	Master Protein Accessions	Positions in Master Proteins	Modifications in Master Proteins	# Missed Cleavages	Theo. MH+ [Da]	Abundance: F1: 126, Sample	Abundance: F1: 127, Sample	Abundance: F1: 128, Sample	Abundance: F1: 129, Sample	Abundance: F1: 130, Sample	Abundance: F1: 131, Sample	Charge (by Search Engine): Sequest HT	DeltaM [ppm] (by Search Engine): Sequest HT	RT [min] (by Search Engine): Sequest HT
	132.6	123.8	136.1	62.1	82.2	63.1	[-].MSLQVSR.[S]	1xTMT6plex [N-Term]; 1xMet-loss [N-Term]	1	1	1	Q91WK5	Q91WK5 [1-7]	Q91WK5 1xMet-loss [N-Term]	0	918.557	31.8	31	31.7	13.7	18.3	13.5	2	-3.06	35.3049
132.5	133	128.7	70	67.5	68.3	P84099	60S ribosomal protein L19 OS=Mus musculus OX=10090 GN=Rpl19 PE=1 SV=1	32	12	15	12	196	23.5	11.47	2402	2515.3	2264.7	1166.8	1135.4	1104
	Abundances (Grouped): F1, 126	Abundances (Grouped): F1, 127	Abundances (Grouped): F1, 128	Abundances (Grouped): F1, 129	Abundances (Grouped): F1, 130	Abundances (Grouped): F1, 131	Annotated Sequence	Modifications	# Protein Groups	# Proteins	# PSMs	Master Protein Accessions	Positions in Master Proteins	Modifications in Master Proteins	# Missed Cleavages	Theo. MH+ [Da]	Abundance: F1: 126, Sample	Abundance: F1: 127, Sample	Abundance: F1: 128, Sample	Abundance: F1: 129, Sample	Abundance: F1: 130, Sample	Abundance: F1: 131, Sample	Charge (by Search Engine): Sequest HT	DeltaM [ppm] (by Search Engine): Sequest HT	RT [min] (by Search Engine): Sequest HT
	138.3	130.7	137.9	69	61.2	63	[K].KVWLDPNETNEIANANSR.[Q]	1xTMT6plex [K1]; 1xTMT6plex [N-Term]	1	2	1	P84099	P84099 [21-38]		1	2529.35	172.4	170.1	167	79.1	70.8	70	3	-3.05	54.8653
	149.4	133.6	137.9	58.7	56.6	63.9	[K].VWLDPNETNEIANANSR.[Q]	1xTMT6plex [N-Term]	1	2	1	P84099	P84099 [22-38]		0	2172.09	111	103.6	99.5	40.1	39	42.3	2	0.35	58.3143
	126.4	125.5	119.7	83.6	75.2	69.5	[K].KLLADQAEAR.[R]	1xTMT6plex [K1]; 1xTMT6plex [N-Term]	1	2	1	P84099	P84099 [153-162]		1	1572.95	203.3	210.8	187	123.7	112.3	99.7	3	-4.36	41.767
	118.5	123.8	117.9	83.1	73	83.8	[K].KKVWLDPNETNEIANANSR.[Q]	2xTMT6plex [K1; K2]; 1xTMT6plex [N-Term]	1	2	1	P84099	P84099 [20-38]		2	2886.6	164.2	179	158.6	105.9	93.9	103.5	4	-3.19	51.541
	119.9	136.4	120.7	78.7	72.5	71.9	[K].LLADQAEARR.[S]	1xTMT6plex [N-Term]	1	2	1	P84099	P84099 [154-163]		1	1371.79	30.5	36.2	29.8	18.4	17.1	16.3	3	-2.06	40.2688
	131.3	139.9	133.5	60.6	64.2	70.5	[K].LLADQAEAR.[R]	1xTMT6plex [N-Term]	1	2	1	P84099	P84099 [154-162]		0	1215.69	113.9	126.6	112.4	48.3	51.7	54.5	2	-2.82	44.8092
	136.6	135.4	130.8	70.4	65.1	61.8	[R].KKLLADQAEAR.[R]	2xTMT6plex [K1; K2]; 1xTMT6plex [N-Term]	1	2	1	P84099	P84099 [152-162]		2	1930.21	296.2	306.4	275.3	140.3	131	119.4	4	-6.07	40.5593
	136.7	150.2	141.3	63.1	51.9	56.8	[R].HMYHSLYLK.[V]	1xTMT6plex [K9]; 1xTMT6plex [N-Term]	1	2	1	P84099	P84099 [118-126]		0	1649.92	152.5	174.9	153	64.7	53.7	56.5	4	-5.83	44.9204
	116.2	114	115	85.8	84.3	84.7	[K].RLASSVLR.[C]	1xTMT6plex [N-Term]	1	2	3	P84099	P84099 [9-16]		1	1130.72	84.8	86.8	81.5	57.6	57.1	55.1	3	-5.47	38.7787
	141.2	154.6	158	48	52.8	45.4	[R].ILMEHIHK.[L]	1xTMT6plex [K8]; 1xTMT6plex [N-Term]	1	2	1	P84099	P84099 [137-144]		0	1478.89	69.4	79.3	75.4	21.7	24.1	19.9	4	-6.67	46.8352
	109.2	114.5	119.2	79.9	81.7	95.5	[R].ILMEHIHK.[L]	1xOxidation [M3]; 1xTMT6plex [K8]; 1xTMT6plex [N-Term]	1	2	1	P84099	P84099 [137-144]		0	1494.89	43.2	47.3	45.8	29.1	30	33.7	4	-4.13	43.0135
	139.8	137.9	129.5	64.3	64.3	64.3	[K].VKGNVFK.[N]	2xTMT6plex [K2; K7]; 1xTMT6plex [N-Term]	1	2	1	P84099	P84099 [127-133]		1	1478.97	655.1	674.8	589.2	277.2	279.7	268.5	3	-8.39	45.2771
	125.7	125.9	123	71.9	77.6	76	[R].LASSVLR.[C]	1xTMT6plex [N-Term]	1	2	1	P84099	P84099 [10-16]		0	974.62	305.5	319.5	290.2	160.7	175	164.6	2	-5.65	46.434
132.4	131.8	126.4	70.9	64	74.5	Q8CBX0	Calcium permeable stress-gated cation channel 1 OS=Mus musculus OX=10090 GN=Tmem63c PE=1 SV=1	3	2	2	2	802	93	7.77	124.2	129	115.1	61.2	55.7	62.3
	Abundances (Grouped): F1, 126	Abundances (Grouped): F1, 127	Abundances (Grouped): F1, 128	Abundances (Grouped): F1, 129	Abundances (Grouped): F1, 130	Abundances (Grouped): F1, 131	Annotated Sequence	Modifications	# Protein Groups	# Proteins	# PSMs	Master Protein Accessions	Positions in Master Proteins	Modifications in Master Proteins	# Missed Cleavages	Theo. MH+ [Da]	Abundance: F1: 126, Sample	Abundance: F1: 127, Sample	Abundance: F1: 128, Sample	Abundance: F1: 129, Sample	Abundance: F1: 130, Sample	Abundance: F1: 131, Sample	Charge (by Search Engine): Sequest HT	DeltaM [ppm] (by Search Engine): Sequest HT	RT [min] (by Search Engine): Sequest HT
							[R].NLIDLDDQRR.[H]	1xTMT6plex [N-Term]	1	1	1	Q8CBX0	Q8CBX0 [259-268]		1	1486.82							3	2.07	48.445
	132.4	131.8	126.4	70.9	64	74.5	[-].MSAFPDSMDQK.[F]	1xOxidation [M8]; 1xTMT6plex [K11]; 1xTMT6plex [N-Term]; 1xMet-loss [N-Term]	1	3	1	Q8CBX0	Q8CBX0 [1-11]	Q8CBX0 1xMet-loss [N-Term]	0	1599.81	124.2	129	115.1	61.2	55.7	62.3	2	-3.25	56.1979
132.3	130.8	135.8	62.7	65.7	72.6	Q60649	Caseinolytic peptidase B protein homolog OS=Mus musculus OX=10090 GN=Clpb PE=1 SV=1	31	20	24	1	677	76	8.51	28.2	29.1	28.1	12.3	13	13.8
	Abundances (Grouped): F1, 126	Abundances (Grouped): F1, 127	Abundances (Grouped): F1, 128	Abundances (Grouped): F1, 129	Abundances (Grouped): F1, 130	Abundances (Grouped): F1, 131	Annotated Sequence	Modifications	# Protein Groups	# Proteins	# PSMs	Master Protein Accessions	Positions in Master Proteins	Modifications in Master Proteins	# Missed Cleavages	Theo. MH+ [Da]	Abundance: F1: 126, Sample	Abundance: F1: 127, Sample	Abundance: F1: 128, Sample	Abundance: F1: 129, Sample	Abundance: F1: 130, Sample	Abundance: F1: 131, Sample	Charge (by Search Engine): Sequest HT	DeltaM [ppm] (by Search Engine): Sequest HT	RT [min] (by Search Engine): Sequest HT
	132.3	130.8	135.8	62.7	65.7	72.6	[K].TANEQGVHSLEVLVTR.[E]	1xTMT6plex [N-Term]	1	2	1	Q60649	Q60649 [205-220]		0	1982.09	28.2	29.1	28.1	12.3	13	13.8	3	-1.13	55.9666
	98.1	111.8	149.8	76.3	92.9	71.1	[R].EVADVLVDGYNVHYGAR.[S]	1xTMT6plex [N-Term]	2	3	1	Q60649; E9PY58	Q60649 [574-590]; E9PY58 [604-620]		0	2106.08	11.6	13.8	17.2	8.3	10.2	7.5	3	-3.64	58.1392
	153.6	155.1	145.3	46.2	51.9	48	[K].NPSNKDAALMEAAR.[A]	1xTMT6plex [K5]; 1xTMT6plex [N-Term]	2	3	1	Q60649; E9PY58	Q60649 [130-143]; E9PY58 [130-143]		1	1946.05	116.7	123	107.2	32.3	36.6	32.5	3	-0.4	46.5343
	116.6	119.2	128	79.6	79.6	77	[K].FIGSPPGYIGHEEGGQLTK.[K]	1xTMT6plex [K19]; 1xTMT6plex [N-Term]	2	3	1	Q60649; E9PY58	Q60649 [393-411]; E9PY58 [423-441]		0	2445.32	206.5	220.4	220.1	129.7	130.8	121.6	3	-5.95	55.6417
	113.1	112.1	127.9	95.9	74	77	[R].RLLSEGADVNAR.[H]	1xTMT6plex [N-Term]	2	3	2	Q60649; E9PY58	Q60649 [152-163]; E9PY58 [152-163]		1	1529.86	17.3	17.9	19	13.5	10.5	10.5	3	0.65	41.8842
	139.1	134.2	130.1	63	58.5	75.1	[R].IAENLGDVQMSDK.[I]	1xTMT6plex [K13]; 1xTMT6plex [N-Term]	2	3	1	Q60649; E9PY58	Q60649 [491-503]; E9PY58 [521-533]		0	1878	60.7	61.1	55.1	25.3	23.7	29.2	3	-1.42	56.1642
	159.2	147	132.2	57.3	47	57.2	[R].LDMSEFQERHEVAK.[F]	1xTMT6plex [K14]; 1xTMT6plex [N-Term]	2	3	1	Q60649; E9PY58	Q60649 [379-392]; E9PY58 [409-422]		1	2177.14	38.7	37.3	31.2	12.8	10.6	12.4	4	0.6	51.8788
	129.6	143.7	133.4	57.4	68.7	67.1	[R].NEMGHTPLDYAR.[E]	1xTMT6plex [N-Term]	2	3	1	Q60649; E9PY58	Q60649 [266-277]; E9PY58 [296-307]		0	1632.8	32.9	38.1	32.9	13.4	16.2	15.2	3	-0.62	46.9085
	129.7	121.1	119.9	79.9	74.6	74.7	[R].ITVEDSDKHLLK.[S]	2xTMT6plex [K8; K12]; 1xTMT6plex [N-Term]	2	3	1	Q60649; E9PY58	Q60649 [621-632]; E9PY58 [651-662]		1	2085.25	142.4	138.7	127.8	80.7	76	73.1	4	-4.49	50.2547
	114.5	118	121.7	80	85.1	80.8	[R].KLDIQAPLHPEK.[V]	2xTMT6plex [K1; K12]; 1xTMT6plex [N-Term]	2	2	1	Q60649; E9PY58	Q60649 [661-672]; E9PY58 [691-702]		1	2076.28	196.6	211.6	202.9	126.4	135.6	123.7	4	-5.05	49.2806
	129.5	132	140.9	67.6	66.7	63.2	[R].LDMSEFQER.[H]	1xTMT6plex [N-Term]	2	3	1	Q60649; E9PY58	Q60649 [379-387]; E9PY58 [409-417]		0	1383.68	52.9	56.3	55.9	25.4	25.3	23	2	-0.22	56.6925
	143	136.3	134	54.8	65.7	66.1	[K].SPELPSPQAEK.[R]	1xTMT6plex [K11]; 1xTMT6plex [N-Term]	2	3	3	Q60649; E9PY58	Q60649 [633-643]; E9PY58 [663-673]		0	1640.93	97.6	97.1	88.8	34.4	41.6	40.2	2	-1.33	47.8554
							[K].DAALMEAAR.[A]	1xTMT6plex [N-Term]	2	3	1	Q60649; E9PY58	Q60649 [135-143]; E9PY58 [135-143]		0	1176.62							2	1.46	46.5323
	138.5	135.3	135.1	59.6	67.8	63.7	[R].LEIIDKDSK.[T]	2xTMT6plex [K6; K9]; 1xTMT6plex [N-Term]	2	3	1	Q60649; E9PY58	Q60649 [650-658]; E9PY58 [680-688]		1	1748.08	339.3	346.1	321.4	134.3	154.2	139.2	3	-3.36	52.9712
	142.9	145.2	131.2	61.9	62.3	56.5	[R].QEALEMSR.[N]	1xTMT6plex [N-Term]	2	3	1	Q60649; E9PY58	Q60649 [481-488]; E9PY58 [511-518]		0	1192.62	146.3	155.2	130.5	58.3	59.2	51.6	2	0.29	41.3162
							[R].SIKHEVER.[R]	1xTMT6plex [K3]; 1xTMT6plex [N-Term]	2	3	1	Q60649; E9PY58	Q60649 [591-598]; E9PY58 [621-628]		1	1455.87							4	-5.06	33.6077
	125	133.1	124.3	75.1	71.7	70.8	[K].ENVIRPILK.[A]	1xTMT6plex [K9]; 1xTMT6plex [N-Term]	2	3	1	Q60649; E9PY58	Q60649 [512-520]; E9PY58 [542-550]		0	1540	467.4	519.3	451.3	258.3	248.9	235.8	3	-7.47	49.9488
	145.3	140.7	154.1	53.2	53.2	53.5	[R].GANPLQR.[N]	1xTMT6plex [N-Term]	2	3	1	Q60649; E9PY58	Q60649 [259-265]; E9PY58 [289-295]		0	984.579	152.1	153.7	156.6	51.2	51.7	49.9	2	-0.99	35.9822
	116.6	135.4	141.1	75.5	69.4	61.9	[R].RDEFLGR.[I]	1xTMT6plex [N-Term]	2	3	2	Q60649; E9PY58	Q60649 [525-531]; E9PY58 [555-561]		1	1121.63	50.9	61.7	59.8	30.3	28.1	24.1	3	0.84	39.5113
							[R].EDDFNNR.[L]	1xTMT6plex [N-Term]	2	3	1	Q60649; E9PY58	Q60649 [221-227]; E9PY58 [251-257]		0	1138.53							2	0.55	34.1259
132.3	117.8	138.9	72.1	64.9	74	Q3TYW3	Transmembrane protein 185A OS=Mus musculus OX=10090 GN=Tmem185a PE=2 SV=1	2	1	1	1	322	37.2	7.2	41.1	38.2	41.9	20.6	18.7	20.5
	Abundances (Grouped): F1, 126	Abundances (Grouped): F1, 127	Abundances (Grouped): F1, 128	Abundances (Grouped): F1, 129	Abundances (Grouped): F1, 130	Abundances (Grouped): F1, 131	Annotated Sequence	Modifications	# Protein Groups	# Proteins	# PSMs	Master Protein Accessions	Positions in Master Proteins	Modifications in Master Proteins	# Missed Cleavages	Theo. MH+ [Da]	Abundance: F1: 126, Sample	Abundance: F1: 127, Sample	Abundance: F1: 128, Sample	Abundance: F1: 129, Sample	Abundance: F1: 130, Sample	Abundance: F1: 131, Sample	Charge (by Search Engine): Sequest HT	DeltaM [ppm] (by Search Engine): Sequest HT	RT [min] (by Search Engine): Sequest HT
	132.3	117.8	138.9	72.1	64.9	74	[K].LNIEMPD.[-]	1xTMT6plex [N-Term]	1	2	1	Q3TYW3	Q3TYW3 [316-322]		0	1060.55	41.1	38.2	41.9	20.6	18.7	20.5	2	0.04	58.7329
132.1	115.7	100.9	71	91.7	88.6	P28665	Murinoglobulin-1 OS=Mus musculus OX=10090 GN=Mug1 PE=1 SV=3	1	1	1	1	1476	165.2	6.42	17.4	15.9	12.9	8.6	11.2	10.4
	Abundances (Grouped): F1, 126	Abundances (Grouped): F1, 127	Abundances (Grouped): F1, 128	Abundances (Grouped): F1, 129	Abundances (Grouped): F1, 130	Abundances (Grouped): F1, 131	Annotated Sequence	Modifications	# Protein Groups	# Proteins	# PSMs	Master Protein Accessions	Positions in Master Proteins	Modifications in Master Proteins	# Missed Cleavages	Theo. MH+ [Da]	Abundance: F1: 126, Sample	Abundance: F1: 127, Sample	Abundance: F1: 128, Sample	Abundance: F1: 129, Sample	Abundance: F1: 130, Sample	Abundance: F1: 131, Sample	Charge (by Search Engine): Sequest HT	DeltaM [ppm] (by Search Engine): Sequest HT	RT [min] (by Search Engine): Sequest HT
	132.1	115.7	100.9	71	91.7	88.6	[K].FQVENSNR.[L]	1xTMT6plex [N-Term]	1	2	1	P28665	P28665 [1292-1299]		0	1222.64	17.4	15.9	12.9	8.6	11.2	10.4	2	1.6	40.4162
132	140	133.7	66.7	63.3	64.3	P70460	Vasodilator-stimulated phosphoprotein OS=Mus musculus OX=10090 GN=Vasp PE=1 SV=4	17	8	8	8	375	39.6	8.53	499.5	552.9	491.1	232	222.3	216.8
	Abundances (Grouped): F1, 126	Abundances (Grouped): F1, 127	Abundances (Grouped): F1, 128	Abundances (Grouped): F1, 129	Abundances (Grouped): F1, 130	Abundances (Grouped): F1, 131	Annotated Sequence	Modifications	# Protein Groups	# Proteins	# PSMs	Master Protein Accessions	Positions in Master Proteins	Modifications in Master Proteins	# Missed Cleavages	Theo. MH+ [Da]	Abundance: F1: 126, Sample	Abundance: F1: 127, Sample	Abundance: F1: 128, Sample	Abundance: F1: 129, Sample	Abundance: F1: 130, Sample	Abundance: F1: 131, Sample	Charge (by Search Engine): Sequest HT	DeltaM [ppm] (by Search Engine): Sequest HT	RT [min] (by Search Engine): Sequest HT
	140.5	142.4	133.8	65.3	58.1	59.9	[R].VKQELLEEVRK.[E]	2xTMT6plex [K2; K11]; 1xTMT6plex [N-Term]	1	1	1	P70460	P70460 [342-352]		2	2058.29	211.4	223.5	195.4	90.4	81.1	80.3	4	-3.2	54.5894
	136.9	151.5	139.2	57.5	63.2	51.6	[K].ATQVGEKPPKDESASEESEAR.[L]	2xTMT6plex [K7; K10]; 1xTMT6plex [N-Term]	1	1	1	P70460	P70460 [273-293]		1	2932.55	23.8	27.5	23.5	9.2	10.2	8	4	-5.93	38.4286
	115.3	136.1	130	76.7	67.3	74.6	[K].MKEEIIEVFVQELR.[K]	1xOxidation [M1]; 1xTMT6plex [K2]; 1xTMT6plex [N-Term]	1	1	1	P70460	P70460 [357-370]		1	2237.26	87	107.2	95.2	53.2	47.1	50.2	3	1.49	59.0098
	132.5	143.1	138.4	55.2	61.3	69.6	[K].ATQVGEKPPKDESASEESEARLPAQSEPVR.[R]	2xTMT6plex [K7; K10]; 1xTMT6plex [N-Term]	1	1	1	P70460	P70460 [273-302]		2	3910.08	28.2	31.8	28.6	10.8	12.1	13.2	5	-0.62	44.2893
	131.4	132.5	138	63.7	68.1	66.3	[K].QELLEEVRK.[E]	1xTMT6plex [K9]; 1xTMT6plex [N-Term]	1	1	1	P70460	P70460 [344-352]		1	1601.96	51.8	54.5	52.8	23.1	24.9	23.3	3	-0.19	51.925
	139.4	152.2	142.9	57.3	55.7	52.5	[K].NSTTLPR.[M]	1xTMT6plex [N-Term]	1	1	1	P70460	P70460 [308-314]		0	1017.59	66.4	75.7	66.1	25.1	24.6	22.3	2	-4.52	33.2305
	98.9	101.8	121.3	73.4	126.9	77.6	[R].KATQVGEKPPKDESASEESEAR.[L]	3xTMT6plex [K1; K8; K11]; 1xTMT6plex [N-Term]	1	1	1	P70460	P70460 [272-293]		2	3289.8	12	12.9	14.3	8.2	14.3	8.4	5	-3.68	38.039
	129.4	129.9	107.2	89.3	59	85.2	[R].LPAQSEPVR.[R]	1xTMT6plex [N-Term]	1	1	1	P70460	P70460 [294-302]		0	1225.71	18.9	19.8	15.2	12	8	11.1	2	0.16	41.4024
132	131	131.7	68.5	67.7	69.1	Q8C5W0	Calmin OS=Mus musculus OX=10090 GN=Clmn PE=1 SV=2	46	47	67	47	1052	117.2	5.03	5897.8	6111.6	5712.8	2814.1	2809.1	2751
	Abundances (Grouped): F1, 126	Abundances (Grouped): F1, 127	Abundances (Grouped): F1, 128	Abundances (Grouped): F1, 129	Abundances (Grouped): F1, 130	Abundances (Grouped): F1, 131	Annotated Sequence	Modifications	# Protein Groups	# Proteins	# PSMs	Master Protein Accessions	Positions in Master Proteins	Modifications in Master Proteins	# Missed Cleavages	Theo. MH+ [Da]	Abundance: F1: 126, Sample	Abundance: F1: 127, Sample	Abundance: F1: 128, Sample	Abundance: F1: 129, Sample	Abundance: F1: 130, Sample	Abundance: F1: 131, Sample	Charge (by Search Engine): Sequest HT	DeltaM [ppm] (by Search Engine): Sequest HT	RT [min] (by Search Engine): Sequest HT
	146.9	135.4	141.4	58.4	60.2	57.7	[R].EELIGQISDIR.[V]	1xTMT6plex [N-Term]	1	1	1	Q8C5W0	Q8C5W0 [12-22]		0	1501.84	166.4	160.1	155.5	60.9	63.3	58.3	2	-0.1	58.4016
	113.9	112.6	110.2	81.9	89.5	91.8	[R].SHSEEGLDFKPSPPLSK.[I]	2xTMT6plex [K10; K17]; 1xTMT6plex [N-Term]	1	1	2	Q8C5W0	Q8C5W0 [713-729]		0	2542.41	169.7	175.1	159.5	112.3	123.8	122	4	-0.91	52.0577
	147	129.7	132.9	59.7	73.2	57.5	[R].DLVDFASTSQAFGEDPSSHEK.[T]	1xTMT6plex [K21]; 1xTMT6plex [N-Term]	1	1	1	Q8C5W0	Q8C5W0 [579-599]		0	2725.34	141.9	130.7	124.6	53	65.6	49.5	3	-0.05	58.3578
							[R].SSPSSSLSPGSGGTDSDSSYPPTPTTER.[S]	1xTMT6plex [N-Term]	1	1	4	Q8C5W0	Q8C5W0 [150-177]		0	2970.36							3	0.53	45.7406
							[K].ETKENGPVESQQSQEPPNPELPTKPLEEK.[L]	3xTMT6plex [K3; K24; K29]; 1xTMT6plex [N-Term]	1	2	1	Q8C5W0	Q8C5W0 [844-872]		1	4176.25							5	1.43	51.5908
	134.1	130.8	133.2	70.3	66.2	65.4	[K].FNRDLVDFASTSQAFGEDPSSHEK.[T]	1xTMT6plex [K24]; 1xTMT6plex [N-Term]	1	1	1	Q8C5W0	Q8C5W0 [576-599]		1	3142.55	110.2	112.2	106.3	53.1	50.5	47.9	4	-1.25	58.2749
	146.7	163.9	149.4	48.7	37.2	54.1	[K].QDGHVSLAEVSKEK.[K]	2xTMT6plex [K12; K14]; 1xTMT6plex [N-Term]	1	1	1	Q8C5W0	Q8C5W0 [463-476]		1	2214.27	42.9	50	42.4	13.1	10.1	14.1	4	-0.53	46.027
	114.1	130.1	110.4	65.1	96.5	83.8	[K].GPPPSSPGDHTLLANSTELK.[V]	1xTMT6plex [K20]; 1xTMT6plex [N-Term]	1	1	2	Q8C5W0	Q8C5W0 [532-551]		0	2476.34	20	23.8	18.8	10.5	15.7	13.1	3	-1.39	51.5899
	144.2	118.2	125.5	69.6	69	73.5	[K].ENGPVESQQSQEPPNPELPTKPLEEK.[L]	2xTMT6plex [K21; K26]; 1xTMT6plex [N-Term]	1	2	2	Q8C5W0	Q8C5W0 [847-872]		0	3588.9	18.7	16	15.8	8.3	8.3	8.5	4	4.81	53.1544
	130.2	148.1	134.9	54.6	70.6	61.8	[R].VQNLQVERENVQKR.[T]	1xTMT6plex [K13]; 1xTMT6plex [N-Term]	1	1	1	Q8C5W0	Q8C5W0 [23-36]		2	2198.28	82.7	98.2	83.2	31.9	41.6	35	4	-5.69	41.815
	119.5	111.8	124.9	74	84.7	85	[K].VFVCDQLESPTGFCLDSAPSHK.[L]	2xCarbamidomethyl [C4; C14]; 1xTMT6plex [K22]; 1xTMT6plex [N-Term]	1	1	1	Q8C5W0	Q8C5W0 [350-371]		0	2952.46	63.4	61.9	64.3	36.1	41.7	40.2	3	-0.22	58.4442
	133.1	142.1	133.7	64.1	59.5	67.4	[K].KTVHFEADLHK.[D]	2xTMT6plex [K1; K11]; 1xTMT6plex [N-Term]	1	1	1	Q8C5W0	Q8C5W0 [424-434]		1	2012.19	132.3	147.4	129	58.6	54.9	59.7	5	-3.71	45.249
	107.3	123.7	131.9	72	102.1	62.9	[K].AFSIAHDSLHIPR.[L]	1xTMT6plex [N-Term]	1	1	1	Q8C5W0	Q8C5W0 [250-262]		0	1692.94	22.2	26.7	26.5	13.7	19.6	11.6	4	-4.62	52.6793
	133.7	144.2	139.5	66.9	55.6	60.2	[R].AETEAAESRLEPK.[K]	1xTMT6plex [K13]; 1xTMT6plex [N-Term]	1	1	1	Q8C5W0	Q8C5W0 [624-636]		1	1889.04	160.2	180.4	162.3	73.7	61.8	64.3	3	1.99	43.5133
	128.2	112.9	135	71	79.7	73.2	[K].KLEPPPKDPEQEDQGHALPPETPADK.[K]	3xTMT6plex [K1; K7; K26]; 1xTMT6plex [N-Term]	1	1	1	Q8C5W0	Q8C5W0 [637-662]		2	3780.06	22.2	20.4	22.7	11.3	12.8	11.3	5	1.26	47.8781
	137.2	128.7	128.1	65.9	72	68	[K].TVHFEADLHK.[D]	1xTMT6plex [K10]; 1xTMT6plex [N-Term]	1	1	2	Q8C5W0	Q8C5W0 [425-434]		0	1654.93	177	173.2	160.4	78.2	86.2	78.2	4	-3.06	47.5118
	145.8	129.6	135.2	59.6	60.8	69	[K].DASCSKDPFYSSDFRFEGSPK.[A]	1xCarbamidomethyl [C4]; 2xTMT6plex [K6; K21]; 1xTMT6plex [N-Term]	1	1	1	Q8C5W0	Q8C5W0 [435-455]		2	3114.54	182.8	169.6	164.5	68.7	70.7	77.1	4	-7.37	56.5894
	111.7	116.7	118.8	71.1	74.7	107	[R].AYTVNQETSYPPPDK.[V]	1xTMT6plex [K15]; 1xTMT6plex [N-Term]	1	1	4	Q8C5W0	Q8C5W0 [335-349]		0	2168.13	128.2	139.8	132.3	75	79.5	109.4	3	-0.83	49.5945
	111.9	110.1	121.4	71	98.7	86.8	[K].TGSIAEPTPESSILSTR.[K]	1xTMT6plex [N-Term]	1	1	1	Q8C5W0	Q8C5W0 [395-411]		0	1975.05	14.9	15.3	15.7	8.7	12.2	10.3	3	-3.94	54.4321
	131.6	133.6	131.6	70	65.4	67.8	[K].TGSIAEPTPESSILSTRK.[D]	1xTMT6plex [K18]; 1xTMT6plex [N-Term]	1	1	1	Q8C5W0	Q8C5W0 [395-412]		1	2332.31	136.8	145	132.8	66.9	63.1	62.8	3	-1.39	52.1368
	140	139	135.6	61.6	60.4	63.4	[R].VLLLSENGER.[A]	1xTMT6plex [N-Term]	1	1	1	Q8C5W0	Q8C5W0 [325-334]		0	1358.78	271.8	281.8	255.7	110	108.9	109.7	2	-0.96	54.336
	129.7	128.3	128	70.8	71.5	71.8	[K].AIDPSLVDMK.[Q]	1xTMT6plex [K10]; 1xTMT6plex [N-Term]	1	1	1	Q8C5W0	Q8C5W0 [227-236]		0	1546.89	662.6	684.6	634.9	332.6	338.9	327.1	2	-1.54	58.1374
	136.6	135.8	144.8	65.9	58.7	58.2	[R].SVAVAVKDQR.[K]	1xTMT6plex [K7]; 1xTMT6plex [N-Term]	1	1	1	Q8C5W0	Q8C5W0 [178-187]		1	1530.94	229.5	238.2	236.2	101.8	91.5	87.1	3	-4.26	39.4465
	124.3	124.6	127.5	78.3	67.2	78	[R].VQNLQVERENVQK.[R]	1xTMT6plex [K13]; 1xTMT6plex [N-Term]	1	1	1	Q8C5W0	Q8C5W0 [23-35]		1	2042.18	76.3	79.8	76	44.2	38.3	42.7	3	-4.19	45.8241
	133.9	138.6	137.7	63.3	59.5	67	[R].NAADLDDR.[R]	1xTMT6plex [N-Term]	1	1	1	Q8C5W0	Q8C5W0 [951-958]		0	1118.56	76.2	82.3	76.1	33.1	31.4	34	2	-0.65	34.5911
	101.1	106.9	111.7	80.4	102.3	97.7	[K].QDGHVSLAEVSK.[E]	1xTMT6plex [K12]; 1xTMT6plex [N-Term]	1	1	2	Q8C5W0	Q8C5W0 [463-474]		0	1727.97	23.1	25.5	24.8	16.9	21.7	19.9	3	-4.69	45.673
	143.9	141.2	134.2	58.9	60.3	61.4	[R].NLLHEYK.[S]	1xTMT6plex [K7]; 1xTMT6plex [N-Term]	1	1	1	Q8C5W0	Q8C5W0 [79-85]		0	1374.81	226.6	232.1	205.2	85.3	88.1	86.1	3	-4.44	46.5506
							[R].SSDDLEENSSEHKVPSR.[N]	1xTMT6plex [K13]; 1xTMT6plex [N-Term]	1	2	1	Q8C5W0	Q8C5W0 [905-921]		1	2374.19							4	2.45	37.8122
							[K].DPFYSSDFR.[F]	1xTMT6plex [N-Term]	1	1	1	Q8C5W0	Q8C5W0 [441-449]		0	1362.65							2	-1.87	56.2976
	145	147.4	160.1	50.7	50	46.8	[R].IKESPSEQGSR.[V]	1xTMT6plex [K2]; 1xTMT6plex [N-Term]	1	1	2	Q8C5W0	Q8C5W0 [314-324]		1	1675.94	161.5	171.4	173.1	51.9	51.7	46.5	3	-4.12	33.9369
	109.4	113.8	111.6	84.2	88.1	93	[R].SGLAFLAVIK.[A]	1xTMT6plex [K10]; 1xTMT6plex [N-Term]	1	1	1	Q8C5W0	Q8C5W0 [217-226]		0	1476.96	134.8	146.4	133.5	95.4	100.7	102.1	2	-0.34	59.0124
	142.6	142.8	140.9	59.7	58.4	55.8	[R].NAADLDDRR.[N]	1xTMT6plex [N-Term]	1	1	4	Q8C5W0	Q8C5W0 [951-959]		1	1274.67	150.3	157.1	144.2	57.9	57.1	52.4	3	0.67	30.3121
	141.2	138.1	133.8	63.2	58.6	65	[R].VQNLQVER.[E]	1xTMT6plex [N-Term]	1	1	2	Q8C5W0	Q8C5W0 [23-30]		0	1214.71	233.6	238.4	214.8	96.2	90	95.8	2	-0.44	43.1628
	114.1	104.5	97.3	76	108.3	99.8	[K].HMDHVESSLFIAPGTVR.[S]	1xTMT6plex [N-Term]	1	2	1	Q8C5W0	Q8C5W0 [888-904]		0	2125.11	22.7	21.7	18.8	13.9	20	17.7	4	-1.04	52.8703
							[K].FLEDSNVK.[L]	1xTMT6plex [K8]; 1xTMT6plex [N-Term]	1	1	1	Q8C5W0	Q8C5W0 [103-110]		0	1409.8							2	-2.07	53.8709
	145.8	135.9	136.8	63.2	57.4	60.9	[K].QALEDSTR.[D]	1xTMT6plex [N-Term]	1	1	2	Q8C5W0	Q8C5W0 [237-244]		0	1148.61	197.2	191.9	179.7	78.7	72	73.5	2	-0.42	33.2983
	133.4	125	137.4	67.9	66.2	70.1	[K].QALEDSTRDNLEK.[A]	1xTMT6plex [K13]; 1xTMT6plex [N-Term]	1	1	3	Q8C5W0	Q8C5W0 [237-249]		1	1977.07	150.5	147.2	150.6	70.5	69.3	70.5	4	0.88	45.7908
	113.4	110.5	111	95.9	86.2	83	[K].ELTGNLSR.[S]	1xTMT6plex [N-Term]	1	1	1	Q8C5W0	Q8C5W0 [142-149]		0	1118.64	123.8	125.9	117.6	96.3	87.3	80.7	2	-2.42	41.7979
	137.4	138.9	140.2	65.3	60.3	57.9	[R].SNSLPVKK.[T]	2xTMT6plex [K7; K8]; 1xTMT6plex [N-Term]	1	1	1	Q8C5W0	Q8C5W0 [417-424]		1	1560.01	396.5	418.4	392.8	173.4	161.4	148.9	3	-8.14	41.4446
							[R].NSHSDSSIYIR.[R]	1xTMT6plex [N-Term]	1	2	1	Q8C5W0	Q8C5W0 [922-932]		0	1507.77							3	0.01	36.7053
							[K].TRGEEEGSENHAEKPGK.[R]	2xTMT6plex [K14; K17]; 1xTMT6plex [N-Term]	1	1	1	Q8C5W0	Q8C5W0 [600-616]		1	2542.35							5	-2.53	30.9683
	131.4	133.6	134.1	69.7	65.5	65.5	[R].SVAVAVK.[D]	1xTMT6plex [K7]; 1xTMT6plex [N-Term]	1	1	1	Q8C5W0	Q8C5W0 [178-184]		0	1131.75	500.6	531.4	496.2	244.3	231.7	222.5	2	-2.83	43.3954
							[R].SNSLPVK.[K]	1xTMT6plex [K7]; 1xTMT6plex [N-Term]	1	1	1	Q8C5W0	Q8C5W0 [417-423]		0	1202.75							2	-3.7	43.11
	121.7	123	126.6	77.9	75.1	75.6	[K].TLLSWVQR.[K]	1xTMT6plex [N-Term]	1	1	1	Q8C5W0	Q8C5W0 [192-199]		0	1231.74	400.3	422.2	404.1	235.5	229.2	221.7	2	-0.62	58.6843
	119.9	108.4	107.4	110.9	89.1	64.3	[K].EAPIESTFVR.[I]	1xTMT6plex [N-Term]	1	1	1	Q8C5W0	Q8C5W0 [304-313]		0	1377.76	16.1	15.2	14	13.7	11.1	7.7	2	-1.11	52.6574
							[R].SSDDLEENSSEHK.[V]	1xTMT6plex [K13]; 1xTMT6plex [N-Term]	1	2	2	Q8C5W0	Q8C5W0 [905-917]		0	1934.93							3	-1.85	36.1746
	124.1	125.8	119.3	75	71.4	84.4	[R].FEGSPK.[A]	1xTMT6plex [K6]; 1xTMT6plex [N-Term]	1	1	1	Q8C5W0	Q8C5W0 [450-455]		0	1122.66	51.3	54.3	47.9	28.5	27.4	31.1	2	-3.16	42.602
132	133.7	135.3	68.3	67.2	63.5	B8ZXI1	Queuine tRNA-ribosyltransferase accessory subunit 2 OS=Mus musculus OX=10090 GN=Qtrt2 PE=1 SV=2	2	1	2	1	415	46.3	6.16	478.5	505.8	476.2	227.9	226.2	205.3
	Abundances (Grouped): F1, 126	Abundances (Grouped): F1, 127	Abundances (Grouped): F1, 128	Abundances (Grouped): F1, 129	Abundances (Grouped): F1, 130	Abundances (Grouped): F1, 131	Annotated Sequence	Modifications	# Protein Groups	# Proteins	# PSMs	Master Protein Accessions	Positions in Master Proteins	Modifications in Master Proteins	# Missed Cleavages	Theo. MH+ [Da]	Abundance: F1: 126, Sample	Abundance: F1: 127, Sample	Abundance: F1: 128, Sample	Abundance: F1: 129, Sample	Abundance: F1: 130, Sample	Abundance: F1: 131, Sample	Charge (by Search Engine): Sequest HT	DeltaM [ppm] (by Search Engine): Sequest HT	RT [min] (by Search Engine): Sequest HT
	132	133.7	135.3	68.3	67.2	63.5	[-].MKLSLIK.[V]	2xTMT6plex [K2; K7]; 1xTMT6plex [N-Term]; 1xMet-loss [N-Term]	1	1	2	B8ZXI1	B8ZXI1 [1-7]	B8ZXI1 1xMet-loss [N-Term]	1	1388.98	478.5	505.8	476.2	227.9	226.2	205.3	3	-0.18	52.1566
131.9	128.8	130.4	71.1	67.6	70.2	P62717	60S ribosomal protein L18a OS=Mus musculus OX=10090 GN=Rpl18a PE=1 SV=1	51	12	24	12	176	20.7	10.71	1520.1	1549.5	1459.5	753.9	722.5	720.8
	Abundances (Grouped): F1, 126	Abundances (Grouped): F1, 127	Abundances (Grouped): F1, 128	Abundances (Grouped): F1, 129	Abundances (Grouped): F1, 130	Abundances (Grouped): F1, 131	Annotated Sequence	Modifications	# Protein Groups	# Proteins	# PSMs	Master Protein Accessions	Positions in Master Proteins	Modifications in Master Proteins	# Missed Cleavages	Theo. MH+ [Da]	Abundance: F1: 126, Sample	Abundance: F1: 127, Sample	Abundance: F1: 128, Sample	Abundance: F1: 129, Sample	Abundance: F1: 130, Sample	Abundance: F1: 131, Sample	Charge (by Search Engine): Sequest HT	DeltaM [ppm] (by Search Engine): Sequest HT	RT [min] (by Search Engine): Sequest HT
	144.8	151.5	146.8	50.8	54.6	51.5	[R].DLTTAGAVTQCYR.[D]	1xCarbamidomethyl [C11]; 1xTMT6plex [N-Term]	1	4	4	P62717	P62717 [99-111]		0	1684.85	313	341.7	308.1	100.9	109.5	99.2	2	-3.44	49.2778
							[R].EYRDLTTAGAVTQCYR.[D]	1xCarbamidomethyl [C14]; 1xTMT6plex [N-Term]	1	4	1	P62717	P62717 [96-111]		1	2133.06							3	-1.01	49.6365
							[K].KSSGEIVYCGQVFEK.[S]	1xCarbamidomethyl [C9]; 2xTMT6plex [K1; K15]; 1xTMT6plex [N-Term]	1	5	1	P62717	P62717 [56-70]		1	2418.33							3	-7.01	53.7133
	123	115	120.3	84.1	77.2	80.5	[R].AHSIQIMKVEEIAAGK.[C]	2xTMT6plex [K8; K16]; 1xTMT6plex [N-Term]	1	4	1	P62717	P62717 [121-136]		1	2412.43	278.9	272.3	265	175.4	162.4	162.7	4	-9.56	56.4102
							[K].SSGEIVYCGQVFEK.[S]	1xCarbamidomethyl [C8]; 1xTMT6plex [K14]; 1xTMT6plex [N-Term]	1	5	1	P62717	P62717 [57-70]		0	2061.07							3	3.56	56.7055
	132.1	116.3	118.8	75	71	86.8	[K].VEEIAAGK.[C]	1xTMT6plex [K8]; 1xTMT6plex [N-Term]	1	4	2	P62717	P62717 [129-136]		0	1274.77	98.4	90.4	85.9	51.4	49.1	57.6	2	-3.8	48.3942
	139.7	143.8	151.2	55.9	52.4	57	[R].AHSIQIMK.[V]	1xTMT6plex [K8]; 1xTMT6plex [N-Term]	1	4	1	P62717	P62717 [121-128]		0	1385.83	184.8	198.5	194.2	68	64.3	67.2	3	-5.63	43.633
	124.4	120.6	119	79.5	75.6	80.9	[R].AHSIQIMK.[V]	1xOxidation [M7]; 1xTMT6plex [K8]; 1xTMT6plex [N-Term]	1	4	1	P62717	P62717 [121-128]		0	1401.83	135.8	137.4	126.1	79.8	76.6	78.7	3	-5.7	40.3038
	152.1	146	147.1	52.4	50.3	52.2	[K].IKFPLPHR.[V]	1xTMT6plex [K2]; 1xTMT6plex [N-Term]	1	3	4	P62717	P62717 [150-157]		1	1465.94	91.9	92.1	86.3	29.1	28.2	28.1	4	-1.93	50.8202
	135.1	129.7	134.4	71.6	58.4	70.8	[K].CHTPPLYR.[M]	1xCarbamidomethyl [C1]; 1xTMT6plex [N-Term]	1	4	3	P62717	P62717 [22-29]		0	1272.67	120.5	120.7	116.4	58.7	48.3	56.3	3	-1.52	36.3882
							[R].SGTHNMYR.[E]	1xTMT6plex [N-Term]	1	5	2	P62717	P62717 [88-95]		0	1194.59							3	-4.8	25.5194
	121.6	116.4	117.1	84.9	81.3	78.6	[R].IFAPNHVVAK.[S]	1xTMT6plex [K10]; 1xTMT6plex [N-Term]	1	5	2	P62717	P62717 [32-41]		0	1553.96	296.8	296.4	277.5	190.6	184.1	171	3	-5.57	48.7817
							[K].ASGTLREYK.[V]	1xTMT6plex [K9]; 1xTMT6plex [N-Term]	1	4	1	P62717	P62717 [3-11]		1	1482.87							3	-0.96	40.7872
131.8	137.4	135.8	68.5	62.5	64	Q8QZZ8	Ras-related protein Rab-38 OS=Mus musculus OX=10090 GN=Rab38 PE=1 SV=1	5	1	1	1	211	23.8	7.77	53.4	58.1	53.4	25.5	23.5	23.1
	Abundances (Grouped): F1, 126	Abundances (Grouped): F1, 127	Abundances (Grouped): F1, 128	Abundances (Grouped): F1, 129	Abundances (Grouped): F1, 130	Abundances (Grouped): F1, 131	Annotated Sequence	Modifications	# Protein Groups	# Proteins	# PSMs	Master Protein Accessions	Positions in Master Proteins	Modifications in Master Proteins	# Missed Cleavages	Theo. MH+ [Da]	Abundance: F1: 126, Sample	Abundance: F1: 127, Sample	Abundance: F1: 128, Sample	Abundance: F1: 129, Sample	Abundance: F1: 130, Sample	Abundance: F1: 131, Sample	Charge (by Search Engine): Sequest HT	DeltaM [ppm] (by Search Engine): Sequest HT	RT [min] (by Search Engine): Sequest HT
	131.8	137.4	135.8	68.5	62.5	64	[K].ENINIDEASR.[C]	1xTMT6plex [N-Term]	1	1	1	Q8QZZ8	Q8QZZ8 [162-171]		0	1389.72	53.4	58.1	53.4	25.5	23.5	23.1	2	-0.93	38.4018
131.7	98.1	85.7	87.5	99	98	Q6PAT0	Probable inactive tRNA-specific adenosine deaminase-like protein 3 OS=Mus musculus OX=10090 GN=Adat3 PE=1 SV=1	17	5	5	5	349	37.5	7.23	28.8	22.4	18.2	17.6	20.1	19.1
	Abundances (Grouped): F1, 126	Abundances (Grouped): F1, 127	Abundances (Grouped): F1, 128	Abundances (Grouped): F1, 129	Abundances (Grouped): F1, 130	Abundances (Grouped): F1, 131	Annotated Sequence	Modifications	# Protein Groups	# Proteins	# PSMs	Master Protein Accessions	Positions in Master Proteins	Modifications in Master Proteins	# Missed Cleavages	Theo. MH+ [Da]	Abundance: F1: 126, Sample	Abundance: F1: 127, Sample	Abundance: F1: 128, Sample	Abundance: F1: 129, Sample	Abundance: F1: 130, Sample	Abundance: F1: 131, Sample	Charge (by Search Engine): Sequest HT	DeltaM [ppm] (by Search Engine): Sequest HT	RT [min] (by Search Engine): Sequest HT
	131.7	98.1	85.7	87.5	99	98	[R].AVGAVVVDPASDR.[V]	1xTMT6plex [N-Term]	1	1	1	Q6PAT0	Q6PAT0 [194-206]		0	1484.83	28.8	22.4	18.2	17.6	20.1	19.1	2	1.6	48.3383
							[R].EVSAVYPLPAQPHLK.[R]	1xTMT6plex [K15]; 1xTMT6plex [N-Term]	1	2	1	Q6PAT0	Q6PAT0 [62-76]		0	2107.23							3	-2.21	54.7833
							[R].SHPACSFTQATATQGAR.[A]	1xCarbamidomethyl [C5]; 1xTMT6plex [N-Term]	1	1	1	Q6PAT0	Q6PAT0 [245-261]		0	2019.99							3	-0.21	36.921
							[R].AAMQTHMER.[A]	1xTMT6plex [N-Term]	1	2	1	Q6PAT0	Q6PAT0 [171-179]		0	1303.64							3	-5.72	31.8901
							[R].SQFEEAR.[A]	1xTMT6plex [N-Term]	1	2	1	Q6PAT0	Q6PAT0 [137-143]		0	1095.56							2	0.74	35.337
131.7	128.7	124.5	71.9	70.9	72.4	P62267	40S ribosomal protein S23 OS=Mus musculus OX=10090 GN=Rps23 PE=1 SV=3	30	6	10	6	143	15.8	10.49	717.3	731.5	658.5	360	358.3	351.8
	Abundances (Grouped): F1, 126	Abundances (Grouped): F1, 127	Abundances (Grouped): F1, 128	Abundances (Grouped): F1, 129	Abundances (Grouped): F1, 130	Abundances (Grouped): F1, 131	Annotated Sequence	Modifications	# Protein Groups	# Proteins	# PSMs	Master Protein Accessions	Positions in Master Proteins	Modifications in Master Proteins	# Missed Cleavages	Theo. MH+ [Da]	Abundance: F1: 126, Sample	Abundance: F1: 127, Sample	Abundance: F1: 128, Sample	Abundance: F1: 129, Sample	Abundance: F1: 130, Sample	Abundance: F1: 131, Sample	Charge (by Search Engine): Sequest HT	DeltaM [ppm] (by Search Engine): Sequest HT	RT [min] (by Search Engine): Sequest HT
	96.7	116	93.7	88.4	88.5	116.7	[K].GHAVGDIPGVR.[F]	1xTMT6plex [N-Term]	1	1	2	P62267	P62267 [109-119]		0	1306.74	11.9	14.9	11.2	10	10.1	12.8	3	-3.15	40.9194
							[K].ANPFGGASHAK.[G]	1xTMT6plex [K11]; 1xTMT6plex [N-Term]	1	1	2	P62267	P62267 [38-48]		0	1514.85							3	-5.29	40.4948
	110.4	105.1	100.3	91.2	95.5	97.5	[R].KGHAVGDIPGVR.[F]	1xTMT6plex [K1]; 1xTMT6plex [N-Term]	1	1	1	P62267	P62267 [108-119]		1	1664	89.4	88.8	78.9	67.9	71.8	70.4	4	-6.31	39.396
	139	139.2	132.1	64.3	61.6	63.7	[K].KAHLGTALK.[A]	2xTMT6plex [K1; K9]; 1xTMT6plex [N-Term]	1	1	3	P62267	P62267 [29-37]		1	1626.07	416	434.9	383.9	177.1	171.2	170	4	-5.38	39.4958
	131.4	121.5	124.9	75	74.5	72.7	[K].AHLGTALK.[A]	1xTMT6plex [K8]; 1xTMT6plex [N-Term]	1	1	1	P62267	P62267 [30-37]		0	1268.81	200	192.9	184.5	105	105.2	98.6	3	-3.18	40.6305
							[K].VANVSLLALYK.[G]	1xTMT6plex [K11]; 1xTMT6plex [N-Term]	1	1	1	P62267	P62267 [125-135]		0	1649.04							2	-6.3	58.7895
131.7	129.6	140.4	65.7	65.7	66.9	Q8BVP5	Casein kinase I isoform gamma-2 OS=Mus musculus OX=10090 GN=Csnk1g2 PE=1 SV=1	11	6	6	3	415	47.6	9.06	311	319.6	322	142.8	143.9	140.9
	Abundances (Grouped): F1, 126	Abundances (Grouped): F1, 127	Abundances (Grouped): F1, 128	Abundances (Grouped): F1, 129	Abundances (Grouped): F1, 130	Abundances (Grouped): F1, 131	Annotated Sequence	Modifications	# Protein Groups	# Proteins	# PSMs	Master Protein Accessions	Positions in Master Proteins	Modifications in Master Proteins	# Missed Cleavages	Theo. MH+ [Da]	Abundance: F1: 126, Sample	Abundance: F1: 127, Sample	Abundance: F1: 128, Sample	Abundance: F1: 129, Sample	Abundance: F1: 130, Sample	Abundance: F1: 131, Sample	Charge (by Search Engine): Sequest HT	DeltaM [ppm] (by Search Engine): Sequest HT	RT [min] (by Search Engine): Sequest HT
	127.5	128.7	138.8	68.6	67.4	68.9	[K].IGCGNFGELR.[L]	1xCarbamidomethyl [C3]; 1xTMT6plex [N-Term]	2	12	1	Q8BVP5; Q8BTH8	Q8BVP5 [52-61]; Q8BTH8 [50-59]		0	1351.7	239.6	252.5	253.2	118.6	117.6	115.4	2	-1.27	53.5227
	179.8	162.8	170.3	19.7	22.8	44.6	[K].GGKGELEEGRR.[M]	1xTMT6plex [K3]; 1xTMT6plex [N-Term]	1	2	1	Q8BVP5	Q8BVP5 [7-17]		2	1645.94	34.8	32.9	32	3.5	4.1	7.7	4	-2.87	31.6356
							[K].EYIDPETKK.[H]	2xTMT6plex [K8; K9]; 1xTMT6plex [N-Term]	1	4	1	Q8BVP5	Q8BVP5 [194-202]		1	1810.06							3	-0.19	46.9008
	121.9	122	131.8	68.6	88.2	67.4	[K].EYIDPETK.[K]	1xTMT6plex [K8]; 1xTMT6plex [N-Term]	1	4	1	Q8BVP5	Q8BVP5 [194-201]		0	1452.8	20.1	21	21.1	10.4	13.5	9.9	2	1.01	48.3247
							[R].APQLHLEYR.[F]	1xTMT6plex [N-Term]	2	10	1	Q8BVP5; Q8BTH8	Q8BVP5 [83-91]; Q8BTH8 [81-89]		0	1355.76							3	-3.37	47.7418
	132.4	101.5	129.8	89.9	75.3	71.1	[K].HIPYREHK.[S]	1xTMT6plex [K8]; 1xTMT6plex [N-Term]	2	10	1	Q8BVP5; Q8BTH8	Q8BVP5 [203-210]; Q8BTH8 [202-209]		1	1537.9	16.5	13.2	15.7	10.3	8.7	7.9	4	-6.28	31.9137
131.6	112.4	110.1	74	79.6	92.3	Q8BGX2	Mitochondrial import inner membrane translocase subunit Tim29 OS=Mus musculus OX=10090 GN=Timm29 PE=1 SV=1	15	3	3	3	266	29.4	6.73	20.3	18.1	16.5	10.5	11.4	12.7
	Abundances (Grouped): F1, 126	Abundances (Grouped): F1, 127	Abundances (Grouped): F1, 128	Abundances (Grouped): F1, 129	Abundances (Grouped): F1, 130	Abundances (Grouped): F1, 131	Annotated Sequence	Modifications	# Protein Groups	# Proteins	# PSMs	Master Protein Accessions	Positions in Master Proteins	Modifications in Master Proteins	# Missed Cleavages	Theo. MH+ [Da]	Abundance: F1: 126, Sample	Abundance: F1: 127, Sample	Abundance: F1: 128, Sample	Abundance: F1: 129, Sample	Abundance: F1: 130, Sample	Abundance: F1: 131, Sample	Charge (by Search Engine): Sequest HT	DeltaM [ppm] (by Search Engine): Sequest HT	RT [min] (by Search Engine): Sequest HT
	131.6	112.4	110.1	74	79.6	92.3	[R].VVAPHQLHSEANER.[L]	1xTMT6plex [N-Term]	1	1	1	Q8BGX2	Q8BGX2 [204-217]		0	1815.97	20.3	18.1	16.5	10.5	11.4	12.7	4	-6.44	34.2074
							[R].HSEAFLQR.[L]	1xTMT6plex [N-Term]	1	1	1	Q8BGX2	Q8BGX2 [111-118]		0	1216.66							3	-3.24	37.2285
							[K].DRLALSEADSLVQSDVSR.[-]	1xTMT6plex [N-Term]	1	1	1	Q8BGX2	Q8BGX2 [249-266]		1	2190.16							3	-0.17	57.1112
131.5	136.4	127	70.2	63.6	71.2	Q8C025	Cholinephosphotransferase 1 OS=Mus musculus OX=10090 GN=Chpt1 PE=1 SV=1	6	2	3	2	398	44.6	7.08	94.3	102.1	88.4	46.3	42.3	45.5
	Abundances (Grouped): F1, 126	Abundances (Grouped): F1, 127	Abundances (Grouped): F1, 128	Abundances (Grouped): F1, 129	Abundances (Grouped): F1, 130	Abundances (Grouped): F1, 131	Annotated Sequence	Modifications	# Protein Groups	# Proteins	# PSMs	Master Protein Accessions	Positions in Master Proteins	Modifications in Master Proteins	# Missed Cleavages	Theo. MH+ [Da]	Abundance: F1: 126, Sample	Abundance: F1: 127, Sample	Abundance: F1: 128, Sample	Abundance: F1: 129, Sample	Abundance: F1: 130, Sample	Abundance: F1: 131, Sample	Charge (by Search Engine): Sequest HT	DeltaM [ppm] (by Search Engine): Sequest HT	RT [min] (by Search Engine): Sequest HT
	128.9	132.4	124.1	76.1	63.8	74.5	[K].ALGEPLSAAQLR.[R]	1xTMT6plex [N-Term]	1	4	1	Q8C025	Q8C025 [16-27]		0	1454.85	75.3	80.7	70.4	40.9	34.6	38.8	2	-3.34	54.6037
	143	154.3	139.5	44.2	62.4	56.6	[K].TSCQQAPEQVYK.[H]	1xCarbamidomethyl [C3]; 1xTMT6plex [K12]; 1xTMT6plex [N-Term]	1	1	2	Q8C025	Q8C025 [384-395]		0	1896.99	19	21.4	18	5.4	7.7	6.7	3	0.98	43.1221
131.5	82	107.1	95.8	84.7	98.9	E9Q2H1	E3 ubiquitin-protein ligase UBR5 OS=Mus musculus OX=10090 GN=Ubr5 PE=1 SV=2	2	6	6	6	2792	308.1	5.83	97	63.1	76.7	65	58	65
	Abundances (Grouped): F1, 126	Abundances (Grouped): F1, 127	Abundances (Grouped): F1, 128	Abundances (Grouped): F1, 129	Abundances (Grouped): F1, 130	Abundances (Grouped): F1, 131	Annotated Sequence	Modifications	# Protein Groups	# Proteins	# PSMs	Master Protein Accessions	Positions in Master Proteins	Modifications in Master Proteins	# Missed Cleavages	Theo. MH+ [Da]	Abundance: F1: 126, Sample	Abundance: F1: 127, Sample	Abundance: F1: 128, Sample	Abundance: F1: 129, Sample	Abundance: F1: 130, Sample	Abundance: F1: 131, Sample	Charge (by Search Engine): Sequest HT	DeltaM [ppm] (by Search Engine): Sequest HT	RT [min] (by Search Engine): Sequest HT
							[K].VTFKDEPGEGSGVAR.[S]	1xTMT6plex [K4]; 1xTMT6plex [N-Term]	1	3	1	E9Q2H1	E9Q2H1 [2273-2287]		1	2007.09							3	-2.54	46.7922
							[K].LEHTAQTYSELQGER.[I]	1xTMT6plex [N-Term]	1	3	1	E9Q2H1	E9Q2H1 [452-466]		0	1991							3	1.37	47.2947
							[R].CATTPMAVHR.[V]	1xCarbamidomethyl [C1]; 1xTMT6plex [N-Term]	1	3	1	E9Q2H1	E9Q2H1 [2261-2270]		0	1372.7							3	-5.76	34.3663
							[K].NVMNMQNR.[Q]	1xTMT6plex [N-Term]	1	3	1	E9Q2H1	E9Q2H1 [2104-2111]		0	1235.62							2	-4.35	40.2791
	86.5	71.3	79.6	124.4	115.4	122.8	[K].TGSWVR.[Y]	1xTMT6plex [N-Term]	1	3	1	E9Q2H1	E9Q2H1 [756-761]		0	934.531	33.1	28.5	29.6	43.8	41	41.9	2	-2.8	41.3409
	180.1	93.4	136.7	65	51.6	73.1	[R].IDELQVVK.[T]	1xTMT6plex [K8]; 1xTMT6plex [N-Term]	1	3	1	E9Q2H1	E9Q2H1 [707-714]		0	1401.87	63.9	34.6	47.1	21.2	17	23.1	2	-0.22	51.5757
131.3	131.1	134.3	67.3	68.4	67.7	Q9DA60	Testis-expressed protein 44 OS=Mus musculus OX=10090 GN=Tex44 PE=2 SV=2	15	7	9	7	530	56.5	4.4	724.4	754.9	719.4	341.8	350.1	333.1
	Abundances (Grouped): F1, 126	Abundances (Grouped): F1, 127	Abundances (Grouped): F1, 128	Abundances (Grouped): F1, 129	Abundances (Grouped): F1, 130	Abundances (Grouped): F1, 131	Annotated Sequence	Modifications	# Protein Groups	# Proteins	# PSMs	Master Protein Accessions	Positions in Master Proteins	Modifications in Master Proteins	# Missed Cleavages	Theo. MH+ [Da]	Abundance: F1: 126, Sample	Abundance: F1: 127, Sample	Abundance: F1: 128, Sample	Abundance: F1: 129, Sample	Abundance: F1: 130, Sample	Abundance: F1: 131, Sample	Charge (by Search Engine): Sequest HT	DeltaM [ppm] (by Search Engine): Sequest HT	RT [min] (by Search Engine): Sequest HT
	121.1	129.6	134.2	73.2	70	71.9	[R].TDTFMRQDEDLLSK.[Q]	1xTMT6plex [K14]; 1xTMT6plex [N-Term]	1	1	1	Q9DA60	Q9DA60 [85-98]		1	2157.13	87.6	97.9	94.3	48.7	47	46.4	3	0.07	57.4395
	129	132.2	131.4	61.9	75.6	69.9	[R].TVSPSDSQTQEK.[T]	1xTMT6plex [K12]; 1xTMT6plex [N-Term]	1	1	3	Q9DA60	Q9DA60 [265-276]		0	1764.94	88.8	95	87.8	39.2	48.3	42.9	2	-0.98	36.6076
	137.2	112.1	134.2	81.8	62.5	72.3	[R].MGVAVGILASGCSSPADRLQDEGPR.[L]	1xCarbamidomethyl [C12]; 1xOxidation [M1]; 1xTMT6plex [N-Term]	1	1	1	Q9DA60	Q9DA60 [438-462]		1	2788.39	27.9	23.8	26.5	15.3	11.8	13.1	3	-1.81	55.2883
	134.6	134.9	135	64.5	65.1	66	[K].QISTITEK.[N]	1xTMT6plex [K8]; 1xTMT6plex [N-Term]	1	1	1	Q9DA60	Q9DA60 [99-106]		0	1377.84	286.1	299.2	278.5	126	128.3	125	2	-0.34	46.6616
	133.2	125.8	137.7	69.6	69.5	64.2	[K].QEAEGFK.[A]	1xTMT6plex [K7]; 1xTMT6plex [N-Term]	1	1	1	Q9DA60	Q9DA60 [334-340]		0	1266.71	179.8	177.2	180.5	86.4	87.1	77.3	2	-1.11	42.6905
	126.6	138.3	124.6	66.5	69.5	74.4	[R].LQDEGPR.[L]	1xTMT6plex [N-Term]	1	1	1	Q9DA60	Q9DA60 [456-462]		0	1043.57	54.2	61.8	51.8	26.2	27.6	28.4	2	0	35.7256
							[K].AITTEQNEEQDFIR.[T]	1xTMT6plex [N-Term]	1	1	1	Q9DA60	Q9DA60 [71-84]		0	1922.97							2	1.17	52.9972
131.2	111.3	112.4	85.8	79.8	79.5	A2A977	Cytochrome P450 4A10 OS=Mus musculus OX=10090 GN=Cyp4a10 PE=1 SV=1	2	1	1	1	499	57.2	8.63	48.7	43.1	40.5	29.3	27.5	26.3
	Abundances (Grouped): F1, 126	Abundances (Grouped): F1, 127	Abundances (Grouped): F1, 128	Abundances (Grouped): F1, 129	Abundances (Grouped): F1, 130	Abundances (Grouped): F1, 131	Annotated Sequence	Modifications	# Protein Groups	# Proteins	# PSMs	Master Protein Accessions	Positions in Master Proteins	Modifications in Master Proteins	# Missed Cleavages	Theo. MH+ [Da]	Abundance: F1: 126, Sample	Abundance: F1: 127, Sample	Abundance: F1: 128, Sample	Abundance: F1: 129, Sample	Abundance: F1: 130, Sample	Abundance: F1: 131, Sample	Charge (by Search Engine): Sequest HT	DeltaM [ppm] (by Search Engine): Sequest HT	RT [min] (by Search Engine): Sequest HT
	131.2	111.3	112.4	85.8	79.8	79.5	[-].MSVSALSPTR.[F]	1xTMT6plex [N-Term]; 1xMet-loss [N-Term]	1	3	1	A2A977	A2A977 [1-10]	A2A977 1xMet-loss [N-Term]	0	1146.67	48.7	43.1	40.5	29.3	27.5	26.3	2	-2.45	42.1844
130.8	130.7	130.4	69.8	68.8	69.5	P62754	40S ribosomal protein S6 OS=Mus musculus OX=10090 GN=Rps6 PE=1 SV=1	37	16	26	16	249	28.7	10.84	2996.8	3124	2901.1	1471.5	1461.7	1418.2
	Abundances (Grouped): F1, 126	Abundances (Grouped): F1, 127	Abundances (Grouped): F1, 128	Abundances (Grouped): F1, 129	Abundances (Grouped): F1, 130	Abundances (Grouped): F1, 131	Annotated Sequence	Modifications	# Protein Groups	# Proteins	# PSMs	Master Protein Accessions	Positions in Master Proteins	Modifications in Master Proteins	# Missed Cleavages	Theo. MH+ [Da]	Abundance: F1: 126, Sample	Abundance: F1: 127, Sample	Abundance: F1: 128, Sample	Abundance: F1: 129, Sample	Abundance: F1: 130, Sample	Abundance: F1: 131, Sample	Charge (by Search Engine): Sequest HT	DeltaM [ppm] (by Search Engine): Sequest HT	RT [min] (by Search Engine): Sequest HT
	127.5	148	144	66.1	54.4	60	[-].MKLNISFPATGCQK.[L]	1xCarbamidomethyl [C12]; 2xTMT6plex [K2; K14]; 1xTMT6plex [N-Term]	1	1	1	P62754	P62754 [1-14]		1	2282.3	38.4	46.5	42.1	18.3	15.2	16.1	3	-2.42	58.1076
	127.3	124.2	131.7	71.4	71.4	73.9	[R].MATEVAADALGEEWK.[G]	1xOxidation [M1]; 1xTMT6plex [K15]; 1xTMT6plex [N-Term]	1	1	1	P62754	P62754 [32-46]		0	2095.08	71.9	73.2	72.2	37.1	37.4	37.2	3	-1.58	58.4528
	120.7	134	133.2	75.1	71.9	65.1	[K].DIPGLTDTTVPR.[R]	1xTMT6plex [N-Term]	1	1	3	P62754	P62754 [120-131]		0	1513.84	125.7	145.6	134.7	71.9	69.5	60.4	2	0.9	55.7931
	142.5	148.9	141.2	58.3	52.6	56.5	[K].NKEEAAEYAK.[L]	2xTMT6plex [K2; K10]; 1xTMT6plex [N-Term]	1	1	2	P62754	P62754 [202-211]		1	1840.04	283.6	309.3	272.8	106.7	97.2	100.2	3	-1.23	42.2568
	126.7	129.1	127.7	71.3	71.8	73.5	[K].LNISFPATGCQK.[L]	1xCarbamidomethyl [C10]; 1xTMT6plex [K12]; 1xTMT6plex [N-Term]	1	1	1	P62754	P62754 [3-14]		0	1794	966.4	1027.4	945.6	499.9	507.9	499.6	2	-3.56	58.0462
	140.4	143.3	133.3	59.6	59.8	63.6	[K].KNKEEAAEYAK.[L]	3xTMT6plex [K1; K3; K11]; 1xTMT6plex [N-Term]	1	1	2	P62754	P62754 [201-211]		2	2197.3	353	376	325.5	137.7	139.5	142.6	4	-3.41	40.3187
	120.7	122.9	122.2	78.7	79	76.5	[K].LIEVDDERK.[L]	1xTMT6plex [K9]; 1xTMT6plex [N-Term]	1	1	4	P62754	P62754 [15-23]		1	1574.92	294.7	313.1	289.7	176.8	179.1	166.5	3	-1.93	48.3759
	141	126.9	136.6	68.7	65.8	60.9	[R].KLFNLSK.[E]	2xTMT6plex [K1; K7]; 1xTMT6plex [N-Term]	1	1	1	P62754	P62754 [143-149]		1	1537.01	340.1	319.4	319.9	152.4	147.3	131	3	-0.31	55.1098
	137.4	132.9	136.5	66.8	60.6	65.8	[R].KLFNLSKEDDVR.[Q]	2xTMT6plex [K1; K7]; 1xTMT6plex [N-Term]	1	1	1	P62754	P62754 [143-154]		2	2151.27	376.4	380.2	363.2	168.3	154.2	160.6	4	-7.23	51.6284
							[K].EEAAEYAK.[L]	1xTMT6plex [K8]; 1xTMT6plex [N-Term]	1	1	1	P62754	P62754 [204-211]		0	1368.74							2	0.82	41.8289
	115.6	100.4	108.5	87.1	95.7	92.6	[K].DIPGLTDTTVPRR.[L]	1xTMT6plex [N-Term]	1	1	3	P62754	P62754 [120-132]		1	1669.94	133.9	121.4	122	92.8	102.8	95.6	3	-1.52	50.8814
							[K].LIEVDDER.[K]	1xTMT6plex [N-Term]	1	1	2	P62754	P62754 [15-22]		0	1217.66							2	-2.29	49.8244
							[K].KGEKDIPGLTDTTVPR.[R]	2xTMT6plex [K1; K4]; 1xTMT6plex [N-Term]	1	1	1	P62754	P62754 [116-131]		2	2414.42							4	-5.8	49.4487
							[K].QGVLTHGR.[V]	1xTMT6plex [N-Term]	1	1	1	P62754	P62754 [65-72]		0	1096.64							3	-3.67	28.472
	108.4	97.4	117.8	89.1	106.7	80.5	[K].RMATEVAADALGEEWK.[G]	1xOxidation [M2]; 1xTMT6plex [K16]; 1xTMT6plex [N-Term]	1	1	1	P62754	P62754 [31-46]		1	2251.18	12.7	11.9	13.4	9.6	11.6	8.4	3	-3.17	56.9878
							[K].EDDVRQYVVR.[K]	1xTMT6plex [N-Term]	1	1	1	P62754	P62754 [150-159]		1	1507.81							3	1.4	45.369
130.8	133.4	108.7	69.1	84.6	73.4	Q9DBW3	Protein NATD1 OS=Mus musculus OX=10090 GN=Natd1 PE=1 SV=1	15	2	2	2	110	12.7	8.47	14	14.9	11.3	6.8	8.4	7
	Abundances (Grouped): F1, 126	Abundances (Grouped): F1, 127	Abundances (Grouped): F1, 128	Abundances (Grouped): F1, 129	Abundances (Grouped): F1, 130	Abundances (Grouped): F1, 131	Annotated Sequence	Modifications	# Protein Groups	# Proteins	# PSMs	Master Protein Accessions	Positions in Master Proteins	Modifications in Master Proteins	# Missed Cleavages	Theo. MH+ [Da]	Abundance: F1: 126, Sample	Abundance: F1: 127, Sample	Abundance: F1: 128, Sample	Abundance: F1: 129, Sample	Abundance: F1: 130, Sample	Abundance: F1: 131, Sample	Charge (by Search Engine): Sequest HT	DeltaM [ppm] (by Search Engine): Sequest HT	RT [min] (by Search Engine): Sequest HT
							[R].IVDLQHTEVPDAYRGR.[G]	1xTMT6plex [N-Term]	1	1	1	Q9DBW3	Q9DBW3 [49-64]		1	2098.12							4	1.27	51.3877
	130.8	133.4	108.7	69.1	84.6	73.4	[R].IVDLQHTEVPDAYR.[G]	1xTMT6plex [N-Term]	1	1	1	Q9DBW3	Q9DBW3 [49-62]		0	1885	14	14.9	11.3	6.8	8.4	7	3	-0.66	54.6806
130.7	109.7	108.5	88.1	90.6	72.4	Q9WV52	Pleckstrin-2 OS=Mus musculus OX=10090 GN=Plek2 PE=1 SV=1	2	1	1	1	353	40	9.45	42.9	37.6	34.6	26.6	27.6	21.2
	Abundances (Grouped): F1, 126	Abundances (Grouped): F1, 127	Abundances (Grouped): F1, 128	Abundances (Grouped): F1, 129	Abundances (Grouped): F1, 130	Abundances (Grouped): F1, 131	Annotated Sequence	Modifications	# Protein Groups	# Proteins	# PSMs	Master Protein Accessions	Positions in Master Proteins	Modifications in Master Proteins	# Missed Cleavages	Theo. MH+ [Da]	Abundance: F1: 126, Sample	Abundance: F1: 127, Sample	Abundance: F1: 128, Sample	Abundance: F1: 129, Sample	Abundance: F1: 130, Sample	Abundance: F1: 131, Sample	Charge (by Search Engine): Sequest HT	DeltaM [ppm] (by Search Engine): Sequest HT	RT [min] (by Search Engine): Sequest HT
	130.7	109.7	108.5	88.1	90.6	72.4	[-].MEDGVLK.[E]	1xTMT6plex [K7]; 1xTMT6plex [N-Term]; 1xMet-loss [N-Term]	1	1	1	Q9WV52	Q9WV52 [1-7]	Q9WV52 1xMet-loss [N-Term]	0	1118.68	42.9	37.6	34.6	26.6	27.6	21.2	2	0.97	43.7318
130.7	121.4	115.1	78.2	86.3	68.3	Q5U425	Protein FAM220A OS=Mus musculus OX=10090 GN=Fam220a PE=2 SV=1	16	1	3	1	68	7.8	10.87	36.7	35.6	31.4	20.2	22.5	17.1
	Abundances (Grouped): F1, 126	Abundances (Grouped): F1, 127	Abundances (Grouped): F1, 128	Abundances (Grouped): F1, 129	Abundances (Grouped): F1, 130	Abundances (Grouped): F1, 131	Annotated Sequence	Modifications	# Protein Groups	# Proteins	# PSMs	Master Protein Accessions	Positions in Master Proteins	Modifications in Master Proteins	# Missed Cleavages	Theo. MH+ [Da]	Abundance: F1: 126, Sample	Abundance: F1: 127, Sample	Abundance: F1: 128, Sample	Abundance: F1: 129, Sample	Abundance: F1: 130, Sample	Abundance: F1: 131, Sample	Charge (by Search Engine): Sequest HT	DeltaM [ppm] (by Search Engine): Sequest HT	RT [min] (by Search Engine): Sequest HT
	130.7	121.4	115.1	78.2	86.3	68.3	[-].MATALSGLAVR.[L]	1xTMT6plex [N-Term]; 1xMet-loss [N-Term]	1	2	3	Q5U425	Q5U425 [1-11]	Q5U425 1xMet-loss [N-Term]	0	1187.73	36.7	35.6	31.4	20.2	22.5	17.1	3	-8.62	41.1552
130.5	130.7	129.1	70.5	69.3	69.9	A0A087WSD2	Membrane-spanning 4-domains, subfamily A, member 14 OS=Mus musculus OX=10090 GN=Ms4a14 PE=3 SV=1	10	9	11	9	1232	137.5	4.69	759.4	793.5	729.1	377.2	374.3	362.7
	Abundances (Grouped): F1, 126	Abundances (Grouped): F1, 127	Abundances (Grouped): F1, 128	Abundances (Grouped): F1, 129	Abundances (Grouped): F1, 130	Abundances (Grouped): F1, 131	Annotated Sequence	Modifications	# Protein Groups	# Proteins	# PSMs	Master Protein Accessions	Positions in Master Proteins	Modifications in Master Proteins	# Missed Cleavages	Theo. MH+ [Da]	Abundance: F1: 126, Sample	Abundance: F1: 127, Sample	Abundance: F1: 128, Sample	Abundance: F1: 129, Sample	Abundance: F1: 130, Sample	Abundance: F1: 131, Sample	Charge (by Search Engine): Sequest HT	DeltaM [ppm] (by Search Engine): Sequest HT	RT [min] (by Search Engine): Sequest HT
	147.7	143.7	141.8	59.4	53.5	53.8	[K].DLNTTSSTSYQR.[D]	1xTMT6plex [N-Term]	1	1	2	A0A087WSD2	A0A087WSD2 [1212-1223]		0	1601.8	114	115.8	106.3	42.2	38.3	37	2	0.12	38.7838
							[R].QQDSESGVLIEDVNEDDVQSR.[E]	1xTMT6plex [N-Term]	1	1	1	A0A087WSD2	A0A087WSD2 [1128-1148]		0	2591.23							3	4.64	54.3465
	158.9	148.1	150.1	43	54	45.9	[K].EQKAPNTQLQNWQGGQVLVK.[R]	2xTMT6plex [K3; K20]; 1xTMT6plex [N-Term]	1	1	1	A0A087WSD2	A0A087WSD2 [994-1013]		1	2953.68	114.2	111.1	104.7	28.4	36	29.4	3	-2.57	54.7203
	115.2	117.7	117.6	83.5	82.5	83.5	[K].APNTQLQNWQGGQVLVK.[R]	1xTMT6plex [K17]; 1xTMT6plex [N-Term]	1	1	1	A0A087WSD2	A0A087WSD2 [997-1013]		0	2339.32	282.4	301.3	280	188.2	187.6	182.5	3	-2.37	57.2138
	122.9	126.5	128.4	77.1	71.5	73.7	[K].RYSVDLQVK.[S]	1xTMT6plex [K9]; 1xTMT6plex [N-Term]	1	1	1	A0A087WSD2	A0A087WSD2 [851-859]		1	1565.94	168	180.5	170.4	96.9	90.7	89.8	3	-3.77	48.8725
							[R].ETPSEGTPPQGTPSEGTPSQETVPQETPPQK.[L]	1xTMT6plex [K31]; 1xTMT6plex [N-Term]	1	1	2	A0A087WSD2	A0A087WSD2 [672-702]		0	3676.82							4	-0.04	47.0843
	158.7	159.6	137	45.9	45.9	52.9	[R].RYSEDLQSK.[T]	1xTMT6plex [K9]; 1xTMT6plex [N-Term]	1	1	1	A0A087WSD2	A0A087WSD2 [865-873]		1	1583.88	80.8	84.8	67.7	21.5	21.7	24	3	-3.44	40.0552
							[R].SQDWISQGWR.[N]	1xTMT6plex [N-Term]	1	1	1	A0A087WSD2	A0A087WSD2 [1050-1059]		0	1491.75							2	-1.03	57.5803
							[K].SIDQQIK.[A]	1xTMT6plex [K7]; 1xTMT6plex [N-Term]	1	1	1	A0A087WSD2	A0A087WSD2 [879-885]		0	1289.78							2	-0.49	44.2547
130.4	131.4	130	70.1	68.3	69.9	P47963	60S ribosomal protein L13 OS=Mus musculus OX=10090 GN=Rpl13 PE=1 SV=3	50	14	19	14	211	24.3	11.55	1967.6	2068.9	1904.8	972.3	955.8	940.3
	Abundances (Grouped): F1, 126	Abundances (Grouped): F1, 127	Abundances (Grouped): F1, 128	Abundances (Grouped): F1, 129	Abundances (Grouped): F1, 130	Abundances (Grouped): F1, 131	Annotated Sequence	Modifications	# Protein Groups	# Proteins	# PSMs	Master Protein Accessions	Positions in Master Proteins	Modifications in Master Proteins	# Missed Cleavages	Theo. MH+ [Da]	Abundance: F1: 126, Sample	Abundance: F1: 127, Sample	Abundance: F1: 128, Sample	Abundance: F1: 129, Sample	Abundance: F1: 130, Sample	Abundance: F1: 131, Sample	Charge (by Search Engine): Sequest HT	DeltaM [ppm] (by Search Engine): Sequest HT	RT [min] (by Search Engine): Sequest HT
	137.2	134.7	138.3	60.8	67.8	61.1	[K].EAAEQDVEK.[K]	1xTMT6plex [K9]; 1xTMT6plex [N-Term]	1	1	1	P47963	P47963 [201-209]		0	1476.79	95.7	98.1	93.7	39	43.9	38	2	-3.36	38.7926
	161.3	162.4	146	43.6	41.5	45.2	[R].AKEAAEQDVEK.[K]	2xTMT6plex [K2; K11]; 1xTMT6plex [N-Term]	1	1	1	P47963	P47963 [199-209]		1	1905.09	98.5	103.5	86.6	24.5	23.5	24.6	3	-4.06	42.2105
	141.3	162.4	135.3	57.9	46.2	56.8	[K].KGDSSAEELK.[L]	2xTMT6plex [K1; K10]; 1xTMT6plex [N-Term]	1	1	2	P47963	P47963 [136-145]		1	1751.02	158.7	190.4	147.6	59.8	48.2	56.9	3	-1.27	40.7011
	99.4	105.1	93.6	104.7	97.6	99.6	[K].STESLQANVQR.[L]	1xTMT6plex [N-Term]	1	1	1	P47963	P47963 [106-116]		0	1461.79	51.9	57.3	47.5	50.3	47.3	46.4	2	2.45	38.8871
	86.9	92.6	106.2	105.7	115.2	93.3	[R].IAPRPASGPIRPIVR.[C]	1xTMT6plex [N-Term]	1	1	1	P47963	P47963 [46-60]		0	1829.14	16.1	17.9	19.1	18	19.8	15.4	4	-2.62	43.2452
	113.7	112.9	119.7	87.2	79.2	87.3	[R].VDTWFNQPARK.[I]	1xTMT6plex [K11]; 1xTMT6plex [N-Term]	1	1	1	P47963	P47963 [22-32]		1	1820.02	230	238.5	235.3	162.3	148.7	157.5	3	-3.36	53.823
	123.9	130	130.5	70.9	70.7	73.9	[R].SKLILFPR.[K]	1xTMT6plex [K2]; 1xTMT6plex [N-Term]	1	1	2	P47963	P47963 [122-129]		1	1431.95	168	184.1	171.9	88.5	89	89.4	3	-3.73	56.1074
	122.2	127.5	130	66.6	79.9	73.8	[R].GFSLEELR.[V]	1xTMT6plex [N-Term]	1	1	2	P47963	P47963 [75-82]		0	1179.66	90.4	98.5	93.4	45.3	54.9	48.7	2	-0.19	58.2828
	132.7	128.8	133.5	64.5	73.1	67.5	[R].NGMILKPHFHK.[D]	2xTMT6plex [K6; K11]; 1xTMT6plex [N-Term]	1	1	2	P47963	P47963 [6-16]		0	2009.21	126.8	128.5	123.9	56.7	64.8	57.5	5	-5.6	45.8022
	151.9	145.4	148.7	56.8	52.6	44.5	[R].NKSTESLQANVQR.[L]	1xTMT6plex [K2]; 1xTMT6plex [N-Term]	1	1	1	P47963	P47963 [104-116]		1	1933.09	74.7	74.6	71	25.7	24	19.5	3	-1.98	38.6371
	122.9	126.3	123.7	80.4	81.3	65.4	[R].TIGISVDPR.[R]	1xTMT6plex [N-Term]	1	1	1	P47963	P47963 [93-101]		0	1186.7	58.8	63.1	57.5	35.4	36.1	27.9	2	-1.94	49.9903
	167.6	162	164.6	33.2	31.2	41.3	[R].VITEEEKNFK.[A]	2xTMT6plex [K7; K10]; 1xTMT6plex [N-Term]	1	1	1	P47963	P47963 [168-177]		1	1924.14	162	163.4	154.5	29.5	28	35.6	3	-1.06	51.798
	124.8	123.9	124.5	76.8	73.8	76	[R].VDTWFNQPAR.[K]	1xTMT6plex [N-Term]	1	1	1	P47963	P47963 [22-31]		0	1462.76	467.8	484.8	453.1	264.8	256.7	254	2	-5.31	57.0136
	141.3	133.8	129.5	66.2	64.2	64.9	[R].VITEEEK.[N]	1xTMT6plex [K7]; 1xTMT6plex [N-Term]	1	1	2	P47963	P47963 [168-174]		0	1305.77	168.2	166.2	149.7	72.5	70.9	68.9	2	0.92	44.4066
130.4	132	131	68.9	69.9	67.9	E9PY58	Caseinolytic peptidase B protein homolog OS=Mus musculus OX=10090 GN=Clpb PE=1 SV=1	30	20	24	1	707	79.5	8.56	2129.9	2251.3	2077.7	1034.6	1059.2	989.5
	Abundances (Grouped): F1, 126	Abundances (Grouped): F1, 127	Abundances (Grouped): F1, 128	Abundances (Grouped): F1, 129	Abundances (Grouped): F1, 130	Abundances (Grouped): F1, 131	Annotated Sequence	Modifications	# Protein Groups	# Proteins	# PSMs	Master Protein Accessions	Positions in Master Proteins	Modifications in Master Proteins	# Missed Cleavages	Theo. MH+ [Da]	Abundance: F1: 126, Sample	Abundance: F1: 127, Sample	Abundance: F1: 128, Sample	Abundance: F1: 129, Sample	Abundance: F1: 130, Sample	Abundance: F1: 131, Sample	Charge (by Search Engine): Sequest HT	DeltaM [ppm] (by Search Engine): Sequest HT	RT [min] (by Search Engine): Sequest HT
	98.1	111.8	149.8	76.3	92.9	71.1	[R].EVADVLVDGYNVHYGAR.[S]	1xTMT6plex [N-Term]	2	3	1	Q60649; E9PY58	Q60649 [574-590]; E9PY58 [604-620]		0	2106.08	11.6	13.8	17.2	8.3	10.2	7.5	3	-3.64	58.1392
	153.6	155.1	145.3	46.2	51.9	48	[K].NPSNKDAALMEAAR.[A]	1xTMT6plex [K5]; 1xTMT6plex [N-Term]	2	3	1	Q60649; E9PY58	Q60649 [130-143]; E9PY58 [130-143]		1	1946.05	116.7	123	107.2	32.3	36.6	32.5	3	-0.4	46.5343
	116.6	119.2	128	79.6	79.6	77	[K].FIGSPPGYIGHEEGGQLTK.[K]	1xTMT6plex [K19]; 1xTMT6plex [N-Term]	2	3	1	Q60649; E9PY58	Q60649 [393-411]; E9PY58 [423-441]		0	2445.32	206.5	220.4	220.1	129.7	130.8	121.6	3	-5.95	55.6417
	113.1	112.1	127.9	95.9	74	77	[R].RLLSEGADVNAR.[H]	1xTMT6plex [N-Term]	2	3	2	Q60649; E9PY58	Q60649 [152-163]; E9PY58 [152-163]		1	1529.86	17.3	17.9	19	13.5	10.5	10.5	3	0.65	41.8842
	139.1	134.2	130.1	63	58.5	75.1	[R].IAENLGDVQMSDK.[I]	1xTMT6plex [K13]; 1xTMT6plex [N-Term]	2	3	1	Q60649; E9PY58	Q60649 [491-503]; E9PY58 [521-533]		0	1878	60.7	61.1	55.1	25.3	23.7	29.2	3	-1.42	56.1642
	159.2	147	132.2	57.3	47	57.2	[R].LDMSEFQERHEVAK.[F]	1xTMT6plex [K14]; 1xTMT6plex [N-Term]	2	3	1	Q60649; E9PY58	Q60649 [379-392]; E9PY58 [409-422]		1	2177.14	38.7	37.3	31.2	12.8	10.6	12.4	4	0.6	51.8788
	129.6	143.7	133.4	57.4	68.7	67.1	[R].NEMGHTPLDYAR.[E]	1xTMT6plex [N-Term]	2	3	1	Q60649; E9PY58	Q60649 [266-277]; E9PY58 [296-307]		0	1632.8	32.9	38.1	32.9	13.4	16.2	15.2	3	-0.62	46.9085
	129.7	121.1	119.9	79.9	74.6	74.7	[R].ITVEDSDKHLLK.[S]	2xTMT6plex [K8; K12]; 1xTMT6plex [N-Term]	2	3	1	Q60649; E9PY58	Q60649 [621-632]; E9PY58 [651-662]		1	2085.25	142.4	138.7	127.8	80.7	76	73.1	4	-4.49	50.2547
	114.5	118	121.7	80	85.1	80.8	[R].KLDIQAPLHPEK.[V]	2xTMT6plex [K1; K12]; 1xTMT6plex [N-Term]	2	2	1	Q60649; E9PY58	Q60649 [661-672]; E9PY58 [691-702]		1	2076.28	196.6	211.6	202.9	126.4	135.6	123.7	4	-5.05	49.2806
	129.5	132	140.9	67.6	66.7	63.2	[R].LDMSEFQER.[H]	1xTMT6plex [N-Term]	2	3	1	Q60649; E9PY58	Q60649 [379-387]; E9PY58 [409-417]		0	1383.68	52.9	56.3	55.9	25.4	25.3	23	2	-0.22	56.6925
	143	136.3	134	54.8	65.7	66.1	[K].SPELPSPQAEK.[R]	1xTMT6plex [K11]; 1xTMT6plex [N-Term]	2	3	3	Q60649; E9PY58	Q60649 [633-643]; E9PY58 [663-673]		0	1640.93	97.6	97.1	88.8	34.4	41.6	40.2	2	-1.33	47.8554
							[K].TANEQGVHSLEDGRQDCASWR.[M]	1xCarbamidomethyl [C17]; 1xTMT6plex [N-Term]	1	1	1	E9PY58	E9PY58 [205-225]		1	2645.23							4	2.19	43.7485
							[K].DAALMEAAR.[A]	1xTMT6plex [N-Term]	2	3	1	Q60649; E9PY58	Q60649 [135-143]; E9PY58 [135-143]		0	1176.62							2	1.46	46.5323
	138.5	135.3	135.1	59.6	67.8	63.7	[R].LEIIDKDSK.[T]	2xTMT6plex [K6; K9]; 1xTMT6plex [N-Term]	2	3	1	Q60649; E9PY58	Q60649 [650-658]; E9PY58 [680-688]		1	1748.08	339.3	346.1	321.4	134.3	154.2	139.2	3	-3.36	52.9712
	142.9	145.2	131.2	61.9	62.3	56.5	[R].QEALEMSR.[N]	1xTMT6plex [N-Term]	2	3	1	Q60649; E9PY58	Q60649 [481-488]; E9PY58 [511-518]		0	1192.62	146.3	155.2	130.5	58.3	59.2	51.6	2	0.29	41.3162
							[R].SIKHEVER.[R]	1xTMT6plex [K3]; 1xTMT6plex [N-Term]	2	3	1	Q60649; E9PY58	Q60649 [591-598]; E9PY58 [621-628]		1	1455.87							4	-5.06	33.6077
	125	133.1	124.3	75.1	71.7	70.8	[K].ENVIRPILK.[A]	1xTMT6plex [K9]; 1xTMT6plex [N-Term]	2	3	1	Q60649; E9PY58	Q60649 [512-520]; E9PY58 [542-550]		0	1540	467.4	519.3	451.3	258.3	248.9	235.8	3	-7.47	49.9488
	145.3	140.7	154.1	53.2	53.2	53.5	[R].GANPLQR.[N]	1xTMT6plex [N-Term]	2	3	1	Q60649; E9PY58	Q60649 [259-265]; E9PY58 [289-295]		0	984.579	152.1	153.7	156.6	51.2	51.7	49.9	2	-0.99	35.9822
	116.6	135.4	141.1	75.5	69.4	61.9	[R].RDEFLGR.[I]	1xTMT6plex [N-Term]	2	3	2	Q60649; E9PY58	Q60649 [525-531]; E9PY58 [555-561]		1	1121.63	50.9	61.7	59.8	30.3	28.1	24.1	3	0.84	39.5113
							[R].EDDFNNR.[L]	1xTMT6plex [N-Term]	2	3	1	Q60649; E9PY58	Q60649 [221-227]; E9PY58 [251-257]		0	1138.53							2	0.55	34.1259
130.2	146.4	134.7	67.4	65	56.3	Q5RI75	Ras and EF-hand domain-containing protein homolog OS=Mus musculus OX=10090 GN=Rasef PE=1 SV=1	2	1	1	1	627	70.7	5.38	23.1	27.1	23.2	11	10.7	8.9
	Abundances (Grouped): F1, 126	Abundances (Grouped): F1, 127	Abundances (Grouped): F1, 128	Abundances (Grouped): F1, 129	Abundances (Grouped): F1, 130	Abundances (Grouped): F1, 131	Annotated Sequence	Modifications	# Protein Groups	# Proteins	# PSMs	Master Protein Accessions	Positions in Master Proteins	Modifications in Master Proteins	# Missed Cleavages	Theo. MH+ [Da]	Abundance: F1: 126, Sample	Abundance: F1: 127, Sample	Abundance: F1: 128, Sample	Abundance: F1: 129, Sample	Abundance: F1: 130, Sample	Abundance: F1: 131, Sample	Charge (by Search Engine): Sequest HT	DeltaM [ppm] (by Search Engine): Sequest HT	RT [min] (by Search Engine): Sequest HT
	130.2	146.4	134.7	67.4	65	56.3	[-].MAQEVSSSVAFIHR.[L]	1xTMT6plex [N-Term]; 1xMet-loss [N-Term]	1	1	1	Q5RI75	Q5RI75 [1-14]	Q5RI75 1xMet-loss [N-Term]	0	1659.9	23.1	27.1	23.2	11	10.7	8.9	2	-1.02	45.7067
130.2	130.2	131.3	70.4	68.4	69.5	P86048	60S ribosomal protein L10-like OS=Mus musculus OX=10090 GN=Rpl10l PE=1 SV=1	50	16	29	16	214	24.5	10.11	4929.1	5142.8	4826.1	2451	2403.1	2346.7
	Abundances (Grouped): F1, 126	Abundances (Grouped): F1, 127	Abundances (Grouped): F1, 128	Abundances (Grouped): F1, 129	Abundances (Grouped): F1, 130	Abundances (Grouped): F1, 131	Annotated Sequence	Modifications	# Protein Groups	# Proteins	# PSMs	Master Protein Accessions	Positions in Master Proteins	Modifications in Master Proteins	# Missed Cleavages	Theo. MH+ [Da]	Abundance: F1: 126, Sample	Abundance: F1: 127, Sample	Abundance: F1: 128, Sample	Abundance: F1: 129, Sample	Abundance: F1: 130, Sample	Abundance: F1: 131, Sample	Charge (by Search Engine): Sequest HT	DeltaM [ppm] (by Search Engine): Sequest HT	RT [min] (by Search Engine): Sequest HT
	148.9	158.4	151.6	49	46.7	45.4	[K].FNADEFEDKVAAK.[R]	2xTMT6plex [K9; K13]; 1xTMT6plex [N-Term]	1	1	1	P86048	P86048 [176-188]		1	2171.2	927.8	1029.7	916.8	280.9	269.9	252	3	-3.2	58.132
	156.1	148	154.8	48.3	47.3	45.6	[K].FNADEFEDKVAAKR.[L]	2xTMT6plex [K9; K13]; 1xTMT6plex [N-Term]	1	1	2	P86048	P86048 [176-189]		2	2327.3	527.8	522	507.9	150.1	148.2	137.4	4	-4.73	55.5722
	100	101.2	100.9	99.7	96.8	101.5	[R].VHIGQVIMSIR.[T]	1xTMT6plex [N-Term]	1	3	2	P86048	P86048 [129-139]		0	1481.88	147.3	155.6	144.4	135.1	132.4	133.3	3	-0.64	57.9721
	140.1	138.8	135.8	60.2	63.2	61.8	[R].GAFGKPQGTVAR.[V]	1xTMT6plex [K5]; 1xTMT6plex [N-Term]	1	3	3	P86048	P86048 [117-128]		0	1646.97	610.6	631.8	574.9	241.5	255.7	240.3	3	-5.47	40.4422
	115.7	108.2	111.7	94.2	81.2	89	[K].RLIPDGCGVK.[Y]	1xCarbamidomethyl [C7]; 1xTMT6plex [K10]; 1xTMT6plex [N-Term]	1	3	1	P86048	P86048 [189-198]		1	1572.93	136.2	133	127.7	102	88.7	93.4	3	-3.56	45.591
	135.4	131.4	138.3	62.8	65	67.3	[K].SCGKDGFHIR.[V]	1xCarbamidomethyl [C2]; 1xTMT6plex [K4]; 1xTMT6plex [N-Term]	1	4	1	P86048	P86048 [79-88]		1	1634.88	159.4	161.5	158.1	68	71	70.6	4	0.6	39.8961
	97.9	120.1	92.4	102.9	89.4	97.4	[R].VHIGQVIMSIR.[T]	1xOxidation [M8]; 1xTMT6plex [N-Term]	1	3	2	P86048	P86048 [129-139]		0	1497.88	47.8	61.2	43.8	46.2	40.5	42.4	3	-0.31	54.8025
	128.3	115.9	132.2	72.4	76.6	74.5	[K].FNADEFEDK.[V]	1xTMT6plex [K9]; 1xTMT6plex [N-Term]	1	1	1	P86048	P86048 [176-184]		0	1572.79	71.3	67.2	71.3	37	39.5	36.9	2	0.24	56.8028
							[R].LHPFHVIR.[I]	1xTMT6plex [N-Term]	1	4	2	P86048	P86048 [91-98]		0	1247.76							3	-3.57	42.6573
	130.4	124.1	124.2	74.3	71.5	75.5	[K].YIPERGPLDK.[W]	1xTMT6plex [K10]; 1xTMT6plex [N-Term]	1	1	2	P86048	P86048 [199-208]		1	1645.97	499.9	496.7	462.3	261.9	254.5	258.2	3	-1.87	49.9338
	141.1	148.3	141.4	54.7	65.7	48.8	[K].MLSCAGADR.[LS]	1xCarbamidomethyl [C4]; 1xTMT6plex [N-Term]	1	4	2	P86048	P86048 [102-110]		0	1209.59	47.7	52.3	46.4	17	20.6	14.7	2	0.45	41.1943
	90.2	79.6	85	111.9	111.1	122.2	[K].EHVIEALRR.[A]	1xTMT6plex [N-Term]	1	3	1	P86048	P86048 [146-154]		1	1351.8	146.2	134.8	133.8	166.9	167.2	176.6	3	-2.09	39.3932
	93.4	96.8	101.7	104.4	103.3	100.3	[K].MLSCAGADRLQTGMR.[G]	1xCarbamidomethyl [C4]; 1xTMT6plex [N-Term]	1	3	1	P86048	P86048 [102-116]		1	1895.95	210.4	227.5	222.4	216.1	215.9	201.4	3	-4.06	49.1412
	119.2	123.8	128.4	78.2	74.1	76.3	[R].LIPDGCGVK.[Y]	1xCarbamidomethyl [C6]; 1xTMT6plex [K9]; 1xTMT6plex [N-Term]	1	3	2	P86048	P86048 [190-198]		0	1416.83	641.9	695.5	671.1	387.2	370.1	366	2	-1.48	52.891
	147.4	133.2	141.3	61.4	58.5	58.2	[R].IFDLGRK.[K]	1xTMT6plex [K7]; 1xTMT6plex [N-Term]	1	4	1	P86048	P86048 [33-39]		1	1306.82	388.6	366.7	361.9	148.8	143.2	136.7	3	-5.85	53.8068
							[K].EHVIEALR.[R]	1xTMT6plex [N-Term]	1	3	2	P86048	P86048 [146-153]		0	1195.7							3	-1.55	43.1055
	121.3	130.5	131.5	74.5	68.9	73.3	[K].YIPERGPLDKWR.[A]	1xTMT6plex [K10]; 1xTMT6plex [N-Term]	1	1	1	P86048	P86048 [199-210]		2	1988.15	248.2	278.7	261.2	140.1	130.9	133.7	4	-5.34	53.3171
	112.6	109.5	119.1	82.1	85	91.6	[K].MLSCAGADRLQTGMR.[G]	1xCarbamidomethyl [C4]; 1xOxidation [M1]; 1xTMT6plex [N-Term]	1	3	1	P86048	P86048 [102-116]		1	1911.94	40.4	41	41.5	27.1	28.3	29.3	3	-1.39	44.6724
	142.3	154	152.3	50.1	52.4	49	[K].MLSCAGADR.[LS]	1xCarbamidomethyl [C4]; 1xOxidation [M1]; 1xTMT6plex [N-Term]	1	4	1	P86048	P86048 [102-110]		0	1225.59	77.6	87.6	80.6	25.1	26.5	23.8	2	-2.55	33.742
130.1	130	130	71	69.2	69.7	B2KF24	T-complex protein 11 OS=Mus musculus OX=10090 GN=Tcp11 PE=1 SV=2	36	19	38	19	567	62.1	6.55	2772.1	2891.8	2689.6	1391.8	1367.2	1322.8
	Abundances (Grouped): F1, 126	Abundances (Grouped): F1, 127	Abundances (Grouped): F1, 128	Abundances (Grouped): F1, 129	Abundances (Grouped): F1, 130	Abundances (Grouped): F1, 131	Annotated Sequence	Modifications	# Protein Groups	# Proteins	# PSMs	Master Protein Accessions	Positions in Master Proteins	Modifications in Master Proteins	# Missed Cleavages	Theo. MH+ [Da]	Abundance: F1: 126, Sample	Abundance: F1: 127, Sample	Abundance: F1: 128, Sample	Abundance: F1: 129, Sample	Abundance: F1: 130, Sample	Abundance: F1: 131, Sample	Charge (by Search Engine): Sequest HT	DeltaM [ppm] (by Search Engine): Sequest HT	RT [min] (by Search Engine): Sequest HT
	114.1	124.9	112.7	80.7	89.8	77.8	[K].MDMVNYTIQSLQPQLQEHSVQFER.[A]	1xOxidation [M1]; 1xTMT6plex [N-Term]	1	6	1	B2KF24	B2KF24 [269-292]		0	3166.55	63	72	60.4	41	46	38.3	3	-0.36	58.5704
	68.8	117.2	135.9	71.7	119.5	86.9	[R].RPSTAALTPGSAQGR.[G]	1xTMT6plex [N-Term]	1	1	3	B2KF24	B2KF24 [46-60]		0	1698.94	7.2	12.8	13.8	6.9	11.6	8.1	3	-3.24	35.5952
	134.4	127.8	127.2	70.2	72.8	67.6	[R].VHDASKLDCQLEER.[S]	1xCarbamidomethyl [C9]; 1xTMT6plex [K6]; 1xTMT6plex [N-Term]	1	6	1	B2KF24	B2KF24 [125-138]		1	2158.13	53.3	52.9	49	25.6	26.8	23.9	4	-7.67	44.5341
	143	145.9	137.8	58.3	53.7	61.3	[K].TLISPAQTLATK.[G]	1xTMT6plex [K12]; 1xTMT6plex [N-Term]	1	5	3	B2KF24	B2KF24 [552-563]		0	1702.05	329	350.4	307.9	123.5	114.7	125.8	2	-4.52	55.894
							[R].LQELESQQSQLTILASVLLVASSFSDSGLFSSPQFVDK.[L]	1xTMT6plex [K38]; 1xTMT6plex [N-Term]	1	5	4	B2KF24	B2KF24 [384-421]		0	4557.44							4	1.85	60.5801
	137.5	138.5	135	64.7	63.5	60.8	[R].GDLNVSYLSK.[Y]	1xTMT6plex [K10]; 1xTMT6plex [N-Term]	1	5	1	B2KF24	B2KF24 [217-226]		0	1553.89	582.6	612.6	555.5	252.1	249.8	229.8	2	-0.06	55.7843
	167.3	150.5	170.1	37	39.2	36	[R].KEPGAAESASR.[E]	1xTMT6plex [K1]; 1xTMT6plex [N-Term]	1	3	4	B2KF24	B2KF24 [11-21]		1	1560.87	122	114.5	120.4	24.8	26.5	23.4	3	-0.66	29.8552
	147.1	138.6	145.9	57.3	56.8	54.3	[R].GPVGHGGLR.[T]	1xTMT6plex [N-Term]	1	2	1	B2KF24	B2KF24 [68-76]		0	1078.63	24.3	23.9	23.4	8.7	8.7	8	3	-5.52	28.9545
	117.5	110.5	115.1	89.9	81.7	85.3	[K].EILLSLLLPR.[Q]	1xTMT6plex [N-Term]	1	5	1	B2KF24	B2KF24 [184-193]		0	1395.91	61.8	60.7	58.8	43.5	39.9	40	2	-1.21	59.4227
	120.3	119	121.1	86.8	74.3	78.6	[K].CCFVLGVQR.[S]	2xCarbamidomethyl [C1; C2]; 1xTMT6plex [N-Term]	1	5	2	B2KF24	B2KF24 [500-508]		0	1367.71	483.4	498.9	472.3	320.7	277	281.5	2	-5.96	53.8425
	92.9	89.2	98	103	107	109.9	[R].GAPLPPSPGK.[G]	1xTMT6plex [K10]; 1xTMT6plex [N-Term]	1	3	2	B2KF24	B2KF24 [98-107]		0	1378.85	132.6	133	135.9	135.2	141.7	139.9	2	-5.24	43.5974
	118.6	113	121.5	74.3	83.5	89.2	[R].LENISDPVR.[L]	1xTMT6plex [N-Term]	1	5	2	B2KF24	B2KF24 [247-255]		0	1271.72	54	53.7	53.7	31.1	35.3	36.2	2	-1.04	50.8933
	137.2	140.4	133.1	62.4	63.2	63.7	[R].SLSSSSLK.[G]	1xTMT6plex [K8]; 1xTMT6plex [N-Term]	1	5	2	B2KF24	B2KF24 [139-146]		0	1266.77	439.8	469.6	414.2	183.8	187.9	182	2	-4.11	44.2265
	131.8	129.8	135.9	67.6	68.5	66.4	[R].AKLPSVTR.[G]	1xTMT6plex [K2]; 1xTMT6plex [N-Term]	1	2	3	B2KF24	B2KF24 [90-97]		1	1329.86	355.1	365.2	355.6	167.6	171.4	159.5	3	2.75	41.5003
	136.3	138.2	129	69.8	75.2	51.6	[K].LDCQLEER.[S]	1xCarbamidomethyl [C3]; 1xTMT6plex [N-Term]	1	6	3	B2KF24	B2KF24 [131-138]		0	1291.65	17.2	18.2	15.8	8.1	8.8	5.8	2	2.68	45.4361
							[R].VHDASK.[L]	1xTMT6plex [K6]; 1xTMT6plex [N-Term]	1	6	1	B2KF24	B2KF24 [125-130]		0	1114.66							3	-2.98	27.1422
							[R].IHLFLK.[C]	1xTMT6plex [K6]; 1xTMT6plex [N-Term]	1	5	1	B2KF24	B2KF24 [494-499]		0	1228.82							3	-0.35	57.6761
	133.2	133.9	129	67.4	78.1	58.4	[R].LGMTER.[V]	1xTMT6plex [N-Term]	1	2	1	B2KF24	B2KF24 [119-124]		0	935.518	20.2	21.2	19	9.4	11	7.9	2	-0.62	39.6952
	124.5	144.4	163.5	49.9	51	66.7	[R].SVIDQR.[I]	1xTMT6plex [N-Term]	1	5	2	B2KF24	B2KF24 [488-493]		0	946.552	26.6	32.2	33.9	9.8	10.1	12.7	2	-3.18	33.7153
130.1	103.3	99.6	100.5	80.2	86.4	Q9CY73	39S ribosomal protein L44, mitochondrial OS=Mus musculus OX=10090 GN=Mrpl44 PE=1 SV=3	5	1	1	1	333	37.5	8.51	15.2	12.6	11.3	10.8	8.7	9
	Abundances (Grouped): F1, 126	Abundances (Grouped): F1, 127	Abundances (Grouped): F1, 128	Abundances (Grouped): F1, 129	Abundances (Grouped): F1, 130	Abundances (Grouped): F1, 131	Annotated Sequence	Modifications	# Protein Groups	# Proteins	# PSMs	Master Protein Accessions	Positions in Master Proteins	Modifications in Master Proteins	# Missed Cleavages	Theo. MH+ [Da]	Abundance: F1: 126, Sample	Abundance: F1: 127, Sample	Abundance: F1: 128, Sample	Abundance: F1: 129, Sample	Abundance: F1: 130, Sample	Abundance: F1: 131, Sample	Charge (by Search Engine): Sequest HT	DeltaM [ppm] (by Search Engine): Sequest HT	RT [min] (by Search Engine): Sequest HT
	130.1	103.3	99.6	100.5	80.2	86.4	[R].SEKPNWDYHAEVQAFGSR.[L]	1xTMT6plex [K3]; 1xTMT6plex [N-Term]	1	1	1	Q9CY73	Q9CY73 [61-78]		0	2579.3	15.2	12.6	11.3	10.8	8.7	9	4	-2.74	54.1201
130	127.7	124.5	72.6	71.2	74	Q8C5R5	Expressed sequence BB014433 OS=Mus musculus OX=10090 GN=BB014433 PE=2 SV=1	29	7	8	7	389	40.4	8.53	634.2	650.6	589.8	325.8	322.6	321.9
	Abundances (Grouped): F1, 126	Abundances (Grouped): F1, 127	Abundances (Grouped): F1, 128	Abundances (Grouped): F1, 129	Abundances (Grouped): F1, 130	Abundances (Grouped): F1, 131	Annotated Sequence	Modifications	# Protein Groups	# Proteins	# PSMs	Master Protein Accessions	Positions in Master Proteins	Modifications in Master Proteins	# Missed Cleavages	Theo. MH+ [Da]	Abundance: F1: 126, Sample	Abundance: F1: 127, Sample	Abundance: F1: 128, Sample	Abundance: F1: 129, Sample	Abundance: F1: 130, Sample	Abundance: F1: 131, Sample	Charge (by Search Engine): Sequest HT	DeltaM [ppm] (by Search Engine): Sequest HT	RT [min] (by Search Engine): Sequest HT
	127.9	129.5	118.6	78.3	71.2	74.4	[K].SMPTVSLRPQSFNTDSQVSVPR.[G]	1xTMT6plex [N-Term]	1	2	1	Q8C5R5	Q8C5R5 [6-27]		0	2662.38	211.8	223.9	190.7	119.3	109.5	109.9	3	-3.24	55.6866
	117.6	114.8	118.3	79.4	85.5	84.4	[K].LCAEAPTPVCTPPK.[L]	2xCarbamidomethyl [C2; C10]; 1xTMT6plex [K14]; 1xTMT6plex [N-Term]	1	1	1	Q8C5R5	Q8C5R5 [229-242]; [313-326]; [341-354]		0	1999.08	161.7	164.7	157.9	100.4	109.1	103.5	3	-0.84	50.7504
	147.8	125.7	141.9	63.7	55.7	65.1	[K].AEALTEVSVPPK.[L]	1xTMT6plex [K12]; 1xTMT6plex [N-Term]	1	1	2	Q8C5R5	Q8C5R5 [175-186]		0	1699	53.2	47.2	49.6	21.1	18.6	20.9	3	-2.02	54.3935
	157.1	150.3	156.9	37.9	45.9	51.9	[R].GPNPGVCTPK.[A]	1xCarbamidomethyl [C7]; 1xTMT6plex [K10]; 1xTMT6plex [N-Term]	1	2	1	Q8C5R5	Q8C5R5 [84-93]		0	1484.83	56.4	56.3	54.7	12.5	15.3	16.6	2	-1.54	40.3524
	120.5	118.2	117.8	68.5	83.6	91.3	[R].CPNPGICTPK.[V]	2xCarbamidomethyl [C1; C7]; 1xTMT6plex [K10]; 1xTMT6plex [N-Term]	1	2	1	Q8C5R5	Q8C5R5 [98-107]		0	1601.85	41.3	42.3	39.2	21.6	26.6	27.9	3	-0.9	43.6303
	155.6	156	138.8	50.5	46.5	52.7	[R].CPGVCTPK.[A]	2xCarbamidomethyl [C1; C5]; 1xTMT6plex [K8]; 1xTMT6plex [N-Term]	1	2	1	Q8C5R5	Q8C5R5 [72-79]		0	1376.74	61	63.8	52.8	18.2	16.9	18.4	2	-1.66	39.5939
	123.5	127	117	89.9	72.5	70.1	[K].LCVEAPTR.[V]	1xCarbamidomethyl [C2]; 1xTMT6plex [N-Term]	1	1	1	Q8C5R5	Q8C5R5 [215-222]		0	1174.65	48.8	52.4	44.9	32.7	26.6	24.7	2	2.29	45.2851
129.8	129.1	130.7	70.8	70.1	69.6	A2A9Q2	Nardilysin, N-arginine dibasic convertase, NRD convertase 1 OS=Mus musculus OX=10090 GN=Nrd1 PE=1 SV=1	36	39	57	39	1229	140.5	4.88	7576.9	7867.5	7409.2	3799.8	3795.3	3623.5
	Abundances (Grouped): F1, 126	Abundances (Grouped): F1, 127	Abundances (Grouped): F1, 128	Abundances (Grouped): F1, 129	Abundances (Grouped): F1, 130	Abundances (Grouped): F1, 131	Annotated Sequence	Modifications	# Protein Groups	# Proteins	# PSMs	Master Protein Accessions	Positions in Master Proteins	Modifications in Master Proteins	# Missed Cleavages	Theo. MH+ [Da]	Abundance: F1: 126, Sample	Abundance: F1: 127, Sample	Abundance: F1: 128, Sample	Abundance: F1: 129, Sample	Abundance: F1: 130, Sample	Abundance: F1: 131, Sample	Charge (by Search Engine): Sequest HT	DeltaM [ppm] (by Search Engine): Sequest HT	RT [min] (by Search Engine): Sequest HT
							[R].SFSNVGDPEIIKSPSDPK.[Q]	2xTMT6plex [K12; K18]; 1xTMT6plex [N-Term]	1	3	1	A2A9Q2	A2A9Q2 [91-108]		1	2604.45							4	0.11	54.6599
	140.3	136.4	142.6	57.5	59.4	63.8	[R].SFSNVGDPEIIK.[S]	1xTMT6plex [K12]; 1xTMT6plex [N-Term]	1	3	2	A2A9Q2	A2A9Q2 [91-102]		0	1763.99	260.2	264.1	256.8	98.1	102.3	105.5	2	0.33	56.7252
	142.8	143.3	142.3	59.2	56.9	55.5	[K].IVNTAQGCLWYKK.[D]	1xCarbamidomethyl [C8]; 2xTMT6plex [K12; K13]; 1xTMT6plex [N-Term]	1	3	2	A2A9Q2	A2A9Q2 [762-774]		1	2268.31	702.2	735.4	679.2	267.7	259.6	243.3	3	-2.5	56.5011
	129.2	143.2	135.7	66.5	60.6	64.9	[K].LVAGEHGLIIR.[V]	1xTMT6plex [N-Term]	1	3	1	A2A9Q2	A2A9Q2 [831-841]		0	1406.87	104.4	120.7	106.4	49.4	45.4	46.7	3	-3.6	50.9037
							[K].STCSCPDLQPNGQDLGESGR.[L]	2xCarbamidomethyl [C3; C5]; 1xTMT6plex [N-Term]	1	3	2	A2A9Q2	A2A9Q2 [57-76]		0	2407.08							3	0.24	45.3693
	132.7	158.8	141.3	57.6	53.3	56.3	[R].EVEAVDSEYQLARPSDANRK.[E]	1xTMT6plex [K20]; 1xTMT6plex [N-Term]	1	4	2	A2A9Q2	A2A9Q2 [386-405]		1	2735.44	52.6	65.7	54.4	21	19.6	19.9	4	0.8	48.1786
	125.1	116.6	122.6	76.4	76.3	83	[R].QDFLTGDQLLFEYKPEVIAEALNQLVPQK.[A]	2xTMT6plex [K14; K29]; 1xTMT6plex [N-Term]	1	4	3	A2A9Q2	A2A9Q2 [657-685]		0	4034.25	139.8	136	133	78.5	79.1	82.7	4	-4.34	59.544
	125.2	127.1	128.7	73.7	70.7	74.6	[K].EMLFGSLARPGHPMGK.[F]	1xTMT6plex [K16]; 1xTMT6plex [N-Term]	1	4	1	A2A9Q2	A2A9Q2 [406-421]		0	2186.2	204.7	216.9	204.4	110.9	107.2	108.7	4	-7.52	55.0378
	112.8	108.7	113.4	88.5	85.4	91.2	[R].EMPVQFQVVELPSGHHLCK.[V]	1xCarbamidomethyl [C18]; 1xOxidation [M2]; 1xTMT6plex [K19]; 1xTMT6plex [N-Term]	1	3	1	A2A9Q2	A2A9Q2 [968-986]		0	2709.43	88.7	89.2	86.6	64	62.3	63.9	4	-4.45	55.0007
	118.9	120.3	115.3	77.5	86.2	81.8	[R].EMPVQFQVVELPSGHHLCK.[V]	1xCarbamidomethyl [C18]; 1xTMT6plex [K19]; 1xTMT6plex [N-Term]	1	3	3	A2A9Q2	A2A9Q2 [968-986]		0	2693.43	306.4	323.8	288.5	183.8	206.3	188	4	-4.85	57.5616
	136.7	127	134	70	67.9	64.4	[K].ANLVLLSGANEGR.[C]	1xTMT6plex [N-Term]	1	4	1	A2A9Q2	A2A9Q2 [686-698]		0	1542.88	401.3	389	381.8	189	184.9	168.6	2	-4.51	55.3649
	143.7	139.6	138.2	59.2	61.8	57.6	[K].ANLVLLSGANEGRCDLK.[E]	1xCarbamidomethyl [C14]; 1xTMT6plex [K17]; 1xTMT6plex [N-Term]	1	4	1	A2A9Q2	A2A9Q2 [686-702]		1	2288.28	448.6	454.9	418.8	169.9	178.9	160.3	3	-4.55	55.9467
	144	144.7	135.4	57	56.8	62.1	[R].ALNKGDANSEVTVYYQSGTR.[S]	1xTMT6plex [K4]; 1xTMT6plex [N-Term]	1	3	2	A2A9Q2	A2A9Q2 [989-1008]		1	2631.38	145.5	152.6	132.9	53	53.3	55.9	3	-0.05	49.9344
	97.8	103.4	119.5	102	80.4	96.9	[K].IHALTITWALPPQQQHYR.[V]	1xTMT6plex [N-Term]	1	4	1	A2A9Q2	A2A9Q2 [516-533]		0	2402.33	42.2	46.6	50.1	40.5	32.2	37.3	4	-2.6	58.2271
	130.6	118.4	124.3	78.8	70.4	77.4	[K].IENLTEDAFNTQVTALIK.[L]	1xTMT6plex [K18]; 1xTMT6plex [N-Term]	1	3	1	A2A9Q2	A2A9Q2 [1085-1102]		0	2478.39	149.7	141.6	138.3	83	74.9	79.1	3	0.48	59.0188
	127	129.5	129.2	74.1	70.6	69.7	[K].YPDENGFDAFLKK.[H]	2xTMT6plex [K12; K13]; 1xTMT6plex [N-Term]	1	4	1	A2A9Q2	A2A9Q2 [325-337]		1	2231.23	851.6	906.1	841.1	456.9	439.2	416.6	3	-2.56	58.4431
	139.2	123.5	149.9	56.1	73.5	57.8	[K].IEEFLSSFEEKIENLTEDAFNTQVTALIK.[L]	2xTMT6plex [K11; K29]; 1xTMT6plex [N-Term]	1	3	2	A2A9Q2	A2A9Q2 [1074-1102]		1	4046.18	24.3	22.5	25.4	9	11.9	9	4	0.35	60.4288
							[K].AKSTCSCPDLQPNGQDLGESGR.[L]	2xCarbamidomethyl [C5; C7]; 1xTMT6plex [K2]; 1xTMT6plex [N-Term]	1	3	1	A2A9Q2	A2A9Q2 [55-76]		1	2835.38							3	-1.61	44.0016
	150.2	147.9	129.4	59.3	55.7	57.6	[K].YELEEDGAPFGEDSNSR.[E]	1xTMT6plex [N-Term]	1	3	2	A2A9Q2	A2A9Q2 [1172-1188]		0	2143.96	97.4	100.1	81.5	35.4	33.5	33.3	2	-1.04	55.1106
	148.8	142.1	147.5	55.5	57.2	48.9	[K].AFDCPETEYPAK.[I]	1xCarbamidomethyl [C4]; 1xTMT6plex [K12]; 1xTMT6plex [N-Term]	1	3	2	A2A9Q2	A2A9Q2 [750-761]		0	1885.94	89.2	88.9	85.8	30.6	31.8	26.1	2	-3.21	52.284
	129	131.7	129.6	73.3	64.4	72	[R].TVFQFDVQRK.[Y]	1xTMT6plex [K10]; 1xTMT6plex [N-Term]	1	4	1	A2A9Q2	A2A9Q2 [351-360]		1	1726.01	271.9	289.6	265.2	142.1	125.9	135.3	3	-3.82	54.2783
	134.4	136.8	141.9	61.4	64.9	60.6	[K].LQNGLQALLISDLSNVEGK.[T]	1xTMT6plex [K19]; 1xTMT6plex [N-Term]	1	3	2	A2A9Q2	A2A9Q2 [115-133]		0	2470.43	596	633.2	611	250.4	266.9	239.5	2	-6.44	59.2408
	121.7	126.3	128	75.4	76.6	72	[K].FFWGNAETLKHEPK.[K]	2xTMT6plex [K10; K14]; 1xTMT6plex [N-Term]	1	4	2	A2A9Q2	A2A9Q2 [422-435]		1	2391.34	812.7	879.8	829.9	462.9	474.8	428.3	4	-3.54	56.6792
	135.3	140.2	139.5	61.5	58.2	65.3	[K].YPDENGFDAFLK.[K]	1xTMT6plex [K12]; 1xTMT6plex [N-Term]	1	4	1	A2A9Q2	A2A9Q2 [325-336]		0	1873.97	263.4	285	263.8	110.1	105.2	113.4	3	0.33	58.7313
							[K].GDANSEVTVYYQSGTR.[S]	1xTMT6plex [N-Term]	1	3	1	A2A9Q2	A2A9Q2 [993-1008]		0	1975.96							3	1.5	47.6975
	150.6	148.4	148.4	52.2	50.7	49.6	[R].LAHEIEALK.[S]	1xTMT6plex [K9]; 1xTMT6plex [N-Term]	1	3	1	A2A9Q2	A2A9Q2 [1132-1140]		0	1481.91	111	114.2	106.2	35.4	34.7	32.6	3	-2.61	55.9562
	121.9	135.7	140.5	68.7	65.4	67.8	[K].SNFDLNPDLHLPAENK.[Y]	1xTMT6plex [K16]; 1xTMT6plex [N-Term]	1	3	2	A2A9Q2	A2A9Q2 [725-740]		0	2282.22	62.9	73.1	70.4	32.6	31.3	31.2	3	0.81	57.9971
	160.8	117.9	134.5	67.5	58.1	61.2	[R].LGADESEEEGR.[S]	1xTMT6plex [N-Term]	1	3	3	A2A9Q2	A2A9Q2 [80-90]		0	1420.68	49.5	37.9	40.2	19.1	16.6	16.8	2	-1.86	37.3405
							[K].KIEEFLSSFEEKIENLTEDAFNTQVTALIK.[L]	3xTMT6plex [K1; K12; K30]; 1xTMT6plex [N-Term]	1	3	1	A2A9Q2	A2A9Q2 [1073-1102]		2	4403.44							4	-9.05	60.1183
	131.3	119.1	129	72.1	66.8	81.6	[K].MSSTLLVETR.[N]	1xOxidation [M1]; 1xTMT6plex [N-Term]	1	1	1	A2A9Q2	A2A9Q2 [246-255]		0	1381.76	98	92.8	93.5	49.5	46.3	54.3	2	-6.15	45.9064
	102.4	104.1	101.3	96.1	98.5	97.6	[K].QTLGYHVYPTCR.[N]	1xCarbamidomethyl [C11]; 1xTMT6plex [N-Term]	1	3	1	A2A9Q2	A2A9Q2 [1035-1046]		0	1723.88	73	77.4	70.1	63	65.1	62	3	-3.78	44.242
							[K].YNSETVDKK.[I]	2xTMT6plex [K8; K9]; 1xTMT6plex [N-Term]	1	3	1	A2A9Q2	A2A9Q2 [1065-1073]		1	1771.02							3	-0.49	40.5839
	159.3	122.2	155	50.4	62.6	50.5	[K].ETLDTLEK.[W]	1xTMT6plex [K8]; 1xTMT6plex [N-Term]	1	3	1	A2A9Q2	A2A9Q2 [466-473]		0	1406.81	271.3	217.2	256.3	79	98.9	76.6	2	0.22	51.7918
	132.6	146.5	143.8	58.1	61.2	57.9	[K].YNSETVDK.[K]	1xTMT6plex [K8]; 1xTMT6plex [N-Term]	1	3	1	A2A9Q2	A2A9Q2 [1065-1072]		0	1413.76	43.7	50.4	46	17.6	18.7	17	2	-0.34	41.0497
	117.4	118.4	112.5	82.3	82.7	86.8	[K].RVFEEIQK.[I]	1xTMT6plex [K8]; 1xTMT6plex [N-Term]	1	4	1	A2A9Q2	A2A9Q2 [619-626]		1	1506.9	111.3	117.1	103.5	71.7	72.7	73.3	3	-4.26	48.5542
	136.3	144.7	151.7	53.7	58.4	55.3	[R].LREFWMR.[Y]	1xTMT6plex [N-Term]	1	4	1	A2A9Q2	A2A9Q2 [445-451]		1	1266.7	126.4	140.1	136.6	45.8	50.3	45.7	3	-6.42	55.7791
							[K].KNNIDTHAR.[L]	1xTMT6plex [K1]; 1xTMT6plex [N-Term]	1	4	1	A2A9Q2	A2A9Q2 [436-444]		1	1526.88							4	-1.41	28.3971
							[K].ECEDTHLGEEVDR.[N]	1xCarbamidomethyl [C2]; 1xTMT6plex [N-Term]	1	3	1	A2A9Q2	A2A9Q2 [1105-1117]		0	1817.82							3	4.86	39.3894
	106.3	106.9	104.7	96.1	92.4	93.6	[K].LNFAPLER.[E]	1xTMT6plex [N-Term]	1	3	1	A2A9Q2	A2A9Q2 [960-967]		0	1188.69	577	605.6	551.5	479.9	465.5	452.6	2	-4.85	57.7413
							[R].NLYGVVGAESR.[S]	1xTMT6plex [N-Term]	1	1	1	A2A9Q2	A2A9Q2 [256-266]		0	1393.76							3	-2.08	51.2416
129.6	83.2	84.4	107.4	107.2	88	Q5NCQ5	2-(3-amino-3-carboxypropyl)histidine synthase subunit 1 OS=Mus musculus OX=10090 GN=Dph1 PE=1 SV=1	2	1	1	1	438	48	6.84	18.5	12.4	11.7	14.1	14.2	11.2
	Abundances (Grouped): F1, 126	Abundances (Grouped): F1, 127	Abundances (Grouped): F1, 128	Abundances (Grouped): F1, 129	Abundances (Grouped): F1, 130	Abundances (Grouped): F1, 131	Annotated Sequence	Modifications	# Protein Groups	# Proteins	# PSMs	Master Protein Accessions	Positions in Master Proteins	Modifications in Master Proteins	# Missed Cleavages	Theo. MH+ [Da]	Abundance: F1: 126, Sample	Abundance: F1: 127, Sample	Abundance: F1: 128, Sample	Abundance: F1: 129, Sample	Abundance: F1: 130, Sample	Abundance: F1: 131, Sample	Charge (by Search Engine): Sequest HT	DeltaM [ppm] (by Search Engine): Sequest HT	RT [min] (by Search Engine): Sequest HT
	129.6	83.2	84.4	107.4	107.2	88	[R].QEAIAAAR.[S]	1xTMT6plex [N-Term]	1	2	1	Q5NCQ5	Q5NCQ5 [273-280]		0	1058.62	18.5	12.4	11.7	14.1	14.2	11.2	2	-1.31	35.1639
129.5	125.2	125.9	74.4	74.1	70.9	Q3TLD5	Unconventional prefoldin RPB5 interactor OS=Mus musculus OX=10090 GN=Uri1 PE=1 SV=2	10	6	7	6	531	59	5.07	69.3	69.9	65.4	36.6	36.8	33.8
	Abundances (Grouped): F1, 126	Abundances (Grouped): F1, 127	Abundances (Grouped): F1, 128	Abundances (Grouped): F1, 129	Abundances (Grouped): F1, 130	Abundances (Grouped): F1, 131	Annotated Sequence	Modifications	# Protein Groups	# Proteins	# PSMs	Master Protein Accessions	Positions in Master Proteins	Modifications in Master Proteins	# Missed Cleavages	Theo. MH+ [Da]	Abundance: F1: 126, Sample	Abundance: F1: 127, Sample	Abundance: F1: 128, Sample	Abundance: F1: 129, Sample	Abundance: F1: 130, Sample	Abundance: F1: 131, Sample	Charge (by Search Engine): Sequest HT	DeltaM [ppm] (by Search Engine): Sequest HT	RT [min] (by Search Engine): Sequest HT
							[R].SRENSVCSDTSESSAADVEDR.[R]	1xCarbamidomethyl [C7]; 1xTMT6plex [N-Term]	1	3	1	Q3TLD5	Q3TLD5 [411-431]		1	2530.12							3	1.88	36.3791
	129.5	125.2	125.9	74.4	74.1	70.9	[R].VEFTEDLQK.[M]	1xTMT6plex [K9]; 1xTMT6plex [N-Term]	1	3	1	Q3TLD5	Q3TLD5 [140-148]		0	1566.88	69.3	69.9	65.4	36.6	36.8	33.8	2	-1.03	56.5408
							[K].EVPSEVSEEPTKR.[V]	1xTMT6plex [K12]; 1xTMT6plex [N-Term]	1	3	2	Q3TLD5	Q3TLD5 [506-518]		1	1945.06							3	2.32	42.4606
							[K].EVPSEVSEEPTK.[R]	1xTMT6plex [K12]; 1xTMT6plex [N-Term]	1	3	1	Q3TLD5	Q3TLD5 [506-517]		0	1788.96							3	2.14	46.5207
							[R].SRENSVCSDTSESSAADVEDRR.[G]	1xCarbamidomethyl [C7]; 1xTMT6plex [N-Term]	1	3	1	Q3TLD5	Q3TLD5 [411-432]		2	2686.22							4	-3.96	34.91
							[K].QAVGLVEHR.[K]	1xTMT6plex [N-Term]	1	3	1	Q3TLD5	Q3TLD5 [110-118]		0	1237.72							3	-2.96	37.5639
129.4	126.9	137	69	65.8	71.9	P08730	Keratin, type I cytoskeletal 13 OS=Mus musculus OX=10090 GN=Krt13 PE=1 SV=2	4	3	4	1	437	47.7	4.86	629	643.7	646.8	308.7	296.6	311.7
	Abundances (Grouped): F1, 126	Abundances (Grouped): F1, 127	Abundances (Grouped): F1, 128	Abundances (Grouped): F1, 129	Abundances (Grouped): F1, 130	Abundances (Grouped): F1, 131	Annotated Sequence	Modifications	# Protein Groups	# Proteins	# PSMs	Master Protein Accessions	Positions in Master Proteins	Modifications in Master Proteins	# Missed Cleavages	Theo. MH+ [Da]	Abundance: F1: 126, Sample	Abundance: F1: 127, Sample	Abundance: F1: 128, Sample	Abundance: F1: 129, Sample	Abundance: F1: 130, Sample	Abundance: F1: 131, Sample	Charge (by Search Engine): Sequest HT	DeltaM [ppm] (by Search Engine): Sequest HT	RT [min] (by Search Engine): Sequest HT
	129.3	115.7	124.8	81.4	78.3	70.5	[R].QSVEADINGLRR.[V]	1xTMT6plex [N-Term]	2	3	2	P08730; A2A513	P08730 [194-205]; A2A513 [235-246]		1	1586.88	57	53.2	53.4	33	32	27.7	3	-0.87	48.7395
							[R].QSVEADINGLR.[R]	1xTMT6plex [N-Term]	2	3	1	P08730; A2A513	P08730 [194-204]; A2A513 [235-245]		0	1430.78							2	0.81	52.6548
	129.4	126.9	137	69	65.8	71.9	[R].LASYLDK.[V]	1xTMT6plex [K7]; 1xTMT6plex [N-Term]	1	6	1	P08730	P08730 [107-113]		0	1267.77	629	643.7	646.8	308.7	296.6	311.7	2	-4.5	56.6276
129.3	132	131.1	70.5	67.8	69.3	P70296	Phosphatidylethanolamine-binding protein 1 OS=Mus musculus OX=10090 GN=Pebp1 PE=1 SV=3	83	14	38	13	187	20.8	5.4	5154.1	5489.8	5074.2	2582.9	2505.5	2461.9
	Abundances (Grouped): F1, 126	Abundances (Grouped): F1, 127	Abundances (Grouped): F1, 128	Abundances (Grouped): F1, 129	Abundances (Grouped): F1, 130	Abundances (Grouped): F1, 131	Annotated Sequence	Modifications	# Protein Groups	# Proteins	# PSMs	Master Protein Accessions	Positions in Master Proteins	Modifications in Master Proteins	# Missed Cleavages	Theo. MH+ [Da]	Abundance: F1: 126, Sample	Abundance: F1: 127, Sample	Abundance: F1: 128, Sample	Abundance: F1: 129, Sample	Abundance: F1: 130, Sample	Abundance: F1: 131, Sample	Charge (by Search Engine): Sequest HT	DeltaM [ppm] (by Search Engine): Sequest HT	RT [min] (by Search Engine): Sequest HT
	122.1	119.2	122.3	78	81.6	76.9	[K].LYTLVLTDPDAPSRKDPK.[F]	2xTMT6plex [K15; K18]; 1xTMT6plex [N-Term]	1	3	9	P70296	P70296 [63-80]		2	2716.59	475.1	484.1	462	279	294.8	266.7	4	-1.13	57.7898
	97.9	98.5	95.8	100	97.2	110.6	[K].GNDISSGTVLSDYVGSGPPSGTGLHR.[Y]	1xTMT6plex [N-Term]	1	1	8	P70296	P70296 [94-119]		0	2759.38	58.2	61.1	55.3	54.7	53.6	58.6	3	0.36	56.399
	139	136.1	131.3	68.5	59.7	65.3	[K].KYNLGAPVAGTCYQAEWDDYVPK.[L]	1xCarbamidomethyl [C12]; 2xTMT6plex [K1; K23]; 1xTMT6plex [N-Term]	1	2	2	P70296	P70296 [157-179]		1	3332.72	295.4	301.9	270.9	133.8	117.7	123.7	3	-2.51	58.3511
	154.9	153.9	153.1	44.7	46	47.4	[K].VLTPTQVMNRPSSISWDGLDPGKLYTLVLTDPDAPSR.[K]	1xTMT6plex [K23]; 1xTMT6plex [N-Term]	1	3	1	P70296	P70296 [40-76]		1	4498.41	564.3	585.3	541.6	149.8	155.6	153.8	4	-7.09	58.9338
	117.9	119	123.1	80.7	81.4	78	[K].VLTPTQVMNRPSSISWDGLDPGK.[L]	1xOxidation [M8]; 1xTMT6plex [K23]; 1xTMT6plex [N-Term]	1	3	2	P70296	P70296 [40-62]		0	2972.59	734	773.5	743.9	462	470.2	432.6	3	-4.22	58.1861
	137.2	127.6	128.6	71.9	65.3	69.5	[R].VDYAGVTVDELGK.[V]	1xTMT6plex [K13]; 1xTMT6plex [N-Term]	1	3	3	P70296	P70296 [27-39]		0	1824.02	183.7	178.3	167.2	88.6	81.1	82.9	2	-0.18	57.4057
	134.4	133	141.1	62.6	67.3	61.5	[R].YVWLVYEQEQPLSCDEPILSNK.[S]	1xCarbamidomethyl [C14]; 1xTMT6plex [K22]; 1xTMT6plex [N-Term]	1	2	1	P70296	P70296 [120-141]		0	3168.63	225.2	232.6	229.6	96.5	104.6	91.9	3	-1.32	58.9187
	158.5	161.8	158.9	41.2	39.5	40.1	[R].KKYNLGAPVAGTCYQAEWDDYVPK.[L]	1xCarbamidomethyl [C13]; 3xTMT6plex [K1; K2; K24]; 1xTMT6plex [N-Term]	1	2	1	P70296	P70296 [156-179]		2	3689.98	492.2	524.4	479.1	117.7	113.7	111	4	-2.35	58.0162
	100.5	104.5	107.2	94.1	96.7	97	[K].LYTLVLTDPDAPSR.[K]	1xTMT6plex [N-Term]	1	3	1	P70296	P70296 [63-76]		0	1789.99	258.2	280.1	267.5	222.4	230.4	222.1	2	-6.61	58.7596
	91.9	172.6	129.6	101.2	42.2	62.5	[K].FREWHHFLVVNMK.[G]	1xTMT6plex [K13]; 1xTMT6plex [N-Term]	1	3	2	P70296	P70296 [81-93]		1	2201.22	58.4	114.4	79.9	59.1	24.9	35.4	5	-4.99	57.4114
	123.2	128	126.7	74	72.3	75.8	[K].LYEQLSGK.[-]	1xTMT6plex [K8]; 1xTMT6plex [N-Term]	1	2	4	P70296	P70296 [180-187]		0	1395.82	902.9	978.7	901.6	498.7	491.8	495.3	2	-2.03	53.8416
	102.2	116.9	105	99.5	83.8	92.6	[K].FREWHHFLVVNMK.[G]	1xOxidation [M12]; 1xTMT6plex [K13]; 1xTMT6plex [N-Term]	1	3	1	P70296	P70296 [81-93]		1	2217.22	156.8	187.1	156.4	140.3	119.3	126.6	4	-5.46	53.7127
	112.9	111.5	116.8	88.3	79.4	91.1	[R].EWHHFLVVNMK.[G]	1xOxidation [M10]; 1xTMT6plex [K11]; 1xTMT6plex [N-Term]	2	5	1	P70296; E9QLE5	P70296 [83-93]; E9QLE5 [83-93]		0	1914.05	97.3	100.3	97.7	70	63.5	70	4	-8.22	51.6822
	137.9	133	135.8	69	58.2	66.1	[K].FKVETFRK.[K]	2xTMT6plex [K2; K8]; 1xTMT6plex [N-Term]	1	2	1	P70296	P70296 [149-156]		2	1742.09	316.7	319	303	145.8	124.1	135.3	4	-0.13	49.5258
	165.8	174.6	162	34.6	32	31	[R].GKFKVETFR.[K]	2xTMT6plex [K2; K4]; 1xTMT6plex [N-Term]	1	2	1	P70296	P70296 [147-155]		2	1799.11	335.7	369	318.5	64.5	60.2	56	4	-5.36	46.1806
129.2	86.3	87	102.3	94.8	100.3	P41731	CD63 antigen OS=Mus musculus OX=10090 GN=Cd63 PE=1 SV=2	5	2	2	2	238	25.7	6.98	368	256.6	240.5	267.8	250.6	254.7
	Abundances (Grouped): F1, 126	Abundances (Grouped): F1, 127	Abundances (Grouped): F1, 128	Abundances (Grouped): F1, 129	Abundances (Grouped): F1, 130	Abundances (Grouped): F1, 131	Annotated Sequence	Modifications	# Protein Groups	# Proteins	# PSMs	Master Protein Accessions	Positions in Master Proteins	Modifications in Master Proteins	# Missed Cleavages	Theo. MH+ [Da]	Abundance: F1: 126, Sample	Abundance: F1: 127, Sample	Abundance: F1: 128, Sample	Abundance: F1: 129, Sample	Abundance: F1: 130, Sample	Abundance: F1: 131, Sample	Charge (by Search Engine): Sequest HT	DeltaM [ppm] (by Search Engine): Sequest HT	RT [min] (by Search Engine): Sequest HT
	129.2	86.3	87	102.3	94.8	100.3	[K].TATILDK.[L]	1xTMT6plex [K7]; 1xTMT6plex [N-Term]	1	2	1	P41731	P41731 [132-138]		0	1219.77	368	256.6	240.5	267.8	250.6	254.7	2	-1.55	49.8114
							[R].SGYEVM.[-]	1xTMT6plex [N-Term]	1	1	1	P41731	P41731 [233-238]		0	914.449							2	0.93	50.6131
129.1	116.2	110.6	77.4	95.5	71.1	Q8CDS7	Uncharacterized protein C21orf140 homolog OS=Mus musculus OX=10090 GN=Fam243 PE=2 SV=1	3	1	1	1	251	29.3	9.13	39.9	37.5	33.2	22	27.4	19.6
	Abundances (Grouped): F1, 126	Abundances (Grouped): F1, 127	Abundances (Grouped): F1, 128	Abundances (Grouped): F1, 129	Abundances (Grouped): F1, 130	Abundances (Grouped): F1, 131	Annotated Sequence	Modifications	# Protein Groups	# Proteins	# PSMs	Master Protein Accessions	Positions in Master Proteins	Modifications in Master Proteins	# Missed Cleavages	Theo. MH+ [Da]	Abundance: F1: 126, Sample	Abundance: F1: 127, Sample	Abundance: F1: 128, Sample	Abundance: F1: 129, Sample	Abundance: F1: 130, Sample	Abundance: F1: 131, Sample	Charge (by Search Engine): Sequest HT	DeltaM [ppm] (by Search Engine): Sequest HT	RT [min] (by Search Engine): Sequest HT
	129.1	116.2	110.6	77.4	95.5	71.1	[R].SQFDSAK.[R]	1xTMT6plex [K7]; 1xTMT6plex [N-Term]	1	1	1	Q8CDS7	Q8CDS7 [16-22]		0	1240.69	39.9	37.5	33.2	22	27.4	19.6	2	0.73	40.6115
128.9	116.6	119.7	84	68.8	82.1	Q6ZWU9	40S ribosomal protein S27 OS=Mus musculus OX=10090 GN=Rps27 PE=1 SV=3	42	5	7	2	84	9.5	9.45	92.1	87	83.1	55.2	45.6	52.3
	Abundances (Grouped): F1, 126	Abundances (Grouped): F1, 127	Abundances (Grouped): F1, 128	Abundances (Grouped): F1, 129	Abundances (Grouped): F1, 130	Abundances (Grouped): F1, 131	Annotated Sequence	Modifications	# Protein Groups	# Proteins	# PSMs	Master Protein Accessions	Positions in Master Proteins	Modifications in Master Proteins	# Missed Cleavages	Theo. MH+ [Da]	Abundance: F1: 126, Sample	Abundance: F1: 127, Sample	Abundance: F1: 128, Sample	Abundance: F1: 129, Sample	Abundance: F1: 130, Sample	Abundance: F1: 131, Sample	Charge (by Search Engine): Sequest HT	DeltaM [ppm] (by Search Engine): Sequest HT	RT [min] (by Search Engine): Sequest HT
							[K].RLVQSPNSYFMDVK.[C]	1xTMT6plex [K14]; 1xTMT6plex [N-Term]	2	6	1	Q6ZWY3; Q6ZWU9	Q6ZWY3 [23-36]; Q6ZWU9 [23-36]		1	2142.18							3	-4.58	56.3529
	136.8	99	131.5	87.2	60.9	84.6	[K].DLLHPSPEEEKR.[K]	1xTMT6plex [K11]; 1xTMT6plex [N-Term]	1	3	1	Q6ZWU9	Q6ZWU9 [6-17]		1	1908.06	22.5	17	21	13.2	9.3	12.4	4	-3.14	42.7453
							[K].DLLHPSPEEEK.[R]	1xTMT6plex [K11]; 1xTMT6plex [N-Term]	1	3	2	Q6ZWU9	Q6ZWU9 [6-16]		0	1751.96							3	0.13	47.0614
	143.7	123.5	123.5	74.9	59.4	75	[R].LTEGCSFRR.[K]	1xCarbamidomethyl [C5]; 1xTMT6plex [N-Term]	2	4	1	Q6ZWY3; Q6ZWU9	Q6ZWY3 [73-81]; Q6ZWU9 [73-81]		1	1354.71	41.7	37.4	34.8	20	16	19.4	3	-3.59	40.1124
	107.3	120.1	108.1	92	84.1	88.4	[R].LTEGCSFR.[R]	1xCarbamidomethyl [C5]; 1xTMT6plex [N-Term]	2	4	2	Q6ZWY3; Q6ZWU9	Q6ZWY3 [73-80]; Q6ZWU9 [73-80]		0	1198.61	27.9	32.6	27.3	22	20.3	20.5	2	2.95	45.8305
128.8	122.7	120.1	74.3	77.8	76.2	E0CY16	Cell adhesion molecule 1 OS=Mus musculus OX=10090 GN=Cadm1 PE=1 SV=1	6	2	2	2	390	42.9	5.72	209.2	208	189.4	110.9	117.2	110.3
	Abundances (Grouped): F1, 126	Abundances (Grouped): F1, 127	Abundances (Grouped): F1, 128	Abundances (Grouped): F1, 129	Abundances (Grouped): F1, 130	Abundances (Grouped): F1, 131	Annotated Sequence	Modifications	# Protein Groups	# Proteins	# PSMs	Master Protein Accessions	Positions in Master Proteins	Modifications in Master Proteins	# Missed Cleavages	Theo. MH+ [Da]	Abundance: F1: 126, Sample	Abundance: F1: 127, Sample	Abundance: F1: 128, Sample	Abundance: F1: 129, Sample	Abundance: F1: 130, Sample	Abundance: F1: 131, Sample	Charge (by Search Engine): Sequest HT	DeltaM [ppm] (by Search Engine): Sequest HT	RT [min] (by Search Engine): Sequest HT
	128.8	122.7	120.1	74.3	77.8	76.2	[R].CEASNIVGK.[A]	1xCarbamidomethyl [C1]; 1xTMT6plex [K9]; 1xTMT6plex [N-Term]	1	4	1	E0CY16	E0CY16 [316-324]		0	1435.8	209.2	208	189.4	110.9	117.2	110.3	2	-2.07	44.6691
							[K].AHSDYMLYVYDSR.[A]	1xTMT6plex [N-Term]	1	1	1	E0CY16	E0CY16 [325-337]		0	1848.88							3	-0.72	55.2341
128.3	92.6	123.1	106	89.9	60.1	A0A0N4SVA0	Predicted gene 44596 (Fragment) OS=Mus musculus OX=10090 GN=Gm44596 PE=4 SV=1	5	1	1	1	210	23.2	9.67	14.6	11	13.6	11.1	9.5	6.1
	Abundances (Grouped): F1, 126	Abundances (Grouped): F1, 127	Abundances (Grouped): F1, 128	Abundances (Grouped): F1, 129	Abundances (Grouped): F1, 130	Abundances (Grouped): F1, 131	Annotated Sequence	Modifications	# Protein Groups	# Proteins	# PSMs	Master Protein Accessions	Positions in Master Proteins	Modifications in Master Proteins	# Missed Cleavages	Theo. MH+ [Da]	Abundance: F1: 126, Sample	Abundance: F1: 127, Sample	Abundance: F1: 128, Sample	Abundance: F1: 129, Sample	Abundance: F1: 130, Sample	Abundance: F1: 131, Sample	Charge (by Search Engine): Sequest HT	DeltaM [ppm] (by Search Engine): Sequest HT	RT [min] (by Search Engine): Sequest HT
	128.3	92.6	123.1	106	89.9	60.1	[K].DLQPHSVIQR.[R]	1xTMT6plex [N-Term]	1	4	1	A0A0N4SVA0	A0A0N4SVA0 [91-100]		0	1421.81	14.6	11	13.6	11.1	9.5	6.1	3	-1.23	40.1109
128.2	106.1	99	72.1	79.3	115.2	P55144	Tyrosine-protein kinase receptor TYRO3 OS=Mus musculus OX=10090 GN=Tyro3 PE=1 SV=2	6	4	4	4	880	96.1	5.92	17.6	15.2	13.2	9.1	10.1	14.1
	Abundances (Grouped): F1, 126	Abundances (Grouped): F1, 127	Abundances (Grouped): F1, 128	Abundances (Grouped): F1, 129	Abundances (Grouped): F1, 130	Abundances (Grouped): F1, 131	Annotated Sequence	Modifications	# Protein Groups	# Proteins	# PSMs	Master Protein Accessions	Positions in Master Proteins	Modifications in Master Proteins	# Missed Cleavages	Theo. MH+ [Da]	Abundance: F1: 126, Sample	Abundance: F1: 127, Sample	Abundance: F1: 128, Sample	Abundance: F1: 129, Sample	Abundance: F1: 130, Sample	Abundance: F1: 131, Sample	Charge (by Search Engine): Sequest HT	DeltaM [ppm] (by Search Engine): Sequest HT	RT [min] (by Search Engine): Sequest HT
	128.2	106.1	99	72.1	79.3	115.2	[K].EFDHPHVAK.[L]	1xTMT6plex [K9]; 1xTMT6plex [N-Term]	1	1	1	P55144	P55144 [564-572]		0	1537.85	17.6	15.2	13.2	9.1	10.1	14.1	4	-1.23	39.0629
							[R].GEPAVHFR.[A]	1xTMT6plex [N-Term]	1	1	1	P55144	P55144 [461-468]		0	1141.63							3	-6.4	38.7577
							[R].SSSEAGDGSGVGAVGGIPSDSR.[Y]	1xTMT6plex [N-Term]	1	1	1	P55144	P55144 [817-838]		0	2178.05							3	-0.33	44.6958
							[R].EAQLKQEDGSFVK.[V]	2xTMT6plex [K5; K13]; 1xTMT6plex [N-Term]	1	1	1	P55144	P55144 [524-536]		1	2166.24							3	3.66	50.1896
128.1	127.6	124.4	73.4	73.8	72.8	Q6ZWV7	60S ribosomal protein L35 OS=Mus musculus OX=10090 GN=Rpl35 PE=1 SV=1	19	3	3	3	123	14.5	11.05	772.6	803.3	728.4	407.1	413.2	391.2
	Abundances (Grouped): F1, 126	Abundances (Grouped): F1, 127	Abundances (Grouped): F1, 128	Abundances (Grouped): F1, 129	Abundances (Grouped): F1, 130	Abundances (Grouped): F1, 131	Annotated Sequence	Modifications	# Protein Groups	# Proteins	# PSMs	Master Protein Accessions	Positions in Master Proteins	Modifications in Master Proteins	# Missed Cleavages	Theo. MH+ [Da]	Abundance: F1: 126, Sample	Abundance: F1: 127, Sample	Abundance: F1: 128, Sample	Abundance: F1: 129, Sample	Abundance: F1: 130, Sample	Abundance: F1: 131, Sample	Charge (by Search Engine): Sequest HT	DeltaM [ppm] (by Search Engine): Sequest HT	RT [min] (by Search Engine): Sequest HT
	120.7	122.8	118.7	79.9	79.1	78.8	[R].VLTVINQTQK.[E]	1xTMT6plex [K10]; 1xTMT6plex [N-Term]	1	1	1	Q6ZWV7	Q6ZWV7 [57-66]		0	1602	465.1	493.7	444.1	283.2	282.8	270.8	2	-3.74	54.4662
	114.8	108.3	110.3	86.6	91.8	88.3	[K].VELSQLR.[V]	1xTMT6plex [N-Term]	1	1	1	Q6ZWV7	Q6ZWV7 [26-32]		0	1073.65	47.7	47	44.5	33.1	35.4	32.7	2	-1.79	50.4048
	147.4	142.7	140.1	56	58.1	55.8	[R].LYPLRK.[Y]	1xTMT6plex [K6]; 1xTMT6plex [N-Term]	1	1	1	Q6ZWV7	Q6ZWV7 [113-118]		1	1247.82	259.8	262.6	239.8	90.8	95	87.7	3	-3.19	48.8765
128	120.2	125.1	77.3	72.3	77.2	Q8BVM4	Antizyme inhibitor 2 OS=Mus musculus OX=10090 GN=Azin2 PE=1 SV=1	7	3	3	3	459	49.5	5.58	660.5	647.7	626.8	366.8	346.5	355
	Abundances (Grouped): F1, 126	Abundances (Grouped): F1, 127	Abundances (Grouped): F1, 128	Abundances (Grouped): F1, 129	Abundances (Grouped): F1, 130	Abundances (Grouped): F1, 131	Annotated Sequence	Modifications	# Protein Groups	# Proteins	# PSMs	Master Protein Accessions	Positions in Master Proteins	Modifications in Master Proteins	# Missed Cleavages	Theo. MH+ [Da]	Abundance: F1: 126, Sample	Abundance: F1: 127, Sample	Abundance: F1: 128, Sample	Abundance: F1: 129, Sample	Abundance: F1: 130, Sample	Abundance: F1: 131, Sample	Charge (by Search Engine): Sequest HT	DeltaM [ppm] (by Search Engine): Sequest HT	RT [min] (by Search Engine): Sequest HT
							[R].EVLDQASREEQTGAAPK.[S]	1xTMT6plex [K17]; 1xTMT6plex [N-Term]	1	3	1	Q8BVM4	Q8BVM4 [296-312]		1	2287.23							3	2.13	46.4749
	138.4	129.3	131.2	71	64.3	65.7	[K].SLLGGTQAR.[R]	1xTMT6plex [N-Term]	1	2	1	Q8BVM4	Q8BVM4 [395-403]		0	1131.67	274.6	267.7	252.7	129.6	118.4	116.1	2	-6.78	41.7791
	121.4	114.5	121.2	81.1	77.3	84.3	[R].LAWEALR.[G]	1xTMT6plex [N-Term]	1	1	1	Q8BVM4	Q8BVM4 [412-418]		0	1087.65	385.9	380	374.1	237.2	228.1	238.9	2	-3.61	57.9343
127.8	124.4	127.4	74.1	72.8	73.6	E9QKB2	Intracellular hyaluronan-binding protein 4 OS=Mus musculus OX=10090 GN=Habp4 PE=1 SV=1	42	19	28	19	412	45.9	6.84	1245.4	1265.9	1205.7	664.5	658.2	639.1
	Abundances (Grouped): F1, 126	Abundances (Grouped): F1, 127	Abundances (Grouped): F1, 128	Abundances (Grouped): F1, 129	Abundances (Grouped): F1, 130	Abundances (Grouped): F1, 131	Annotated Sequence	Modifications	# Protein Groups	# Proteins	# PSMs	Master Protein Accessions	Positions in Master Proteins	Modifications in Master Proteins	# Missed Cleavages	Theo. MH+ [Da]	Abundance: F1: 126, Sample	Abundance: F1: 127, Sample	Abundance: F1: 128, Sample	Abundance: F1: 129, Sample	Abundance: F1: 130, Sample	Abundance: F1: 131, Sample	Charge (by Search Engine): Sequest HT	DeltaM [ppm] (by Search Engine): Sequest HT	RT [min] (by Search Engine): Sequest HT
	108.8	101	114.2	86.4	87.6	102	[K].SLAASGAQQPDSPGGPQPPGQK.[R]	1xTMT6plex [K22]; 1xTMT6plex [N-Term]	1	3	2	E9QKB2	E9QKB2 [98-119]		0	2533.34	52.3	50.7	53.3	38.2	39.1	43.7	3	0.54	44.8879
	123.2	117.3	122.1	79.5	75.9	81.9	[R].MEDSMGGCGIRPWGSGK.[D]	1xCarbamidomethyl [C8]; 1xTMT6plex [K17]; 1xTMT6plex [N-Term]	1	3	1	E9QKB2	E9QKB2 [228-244]		0	2283.11	251.1	249.6	241.6	149.1	143.5	148.8	3	-0.27	53.8965
	125.5	115.1	129.9	74.3	80.4	74.8	[K].NLQEQTRPKPEFNIR.[K]	1xTMT6plex [K9]; 1xTMT6plex [N-Term]	1	3	1	E9QKB2	E9QKB2 [297-311]		0	2328.32	139.5	133.6	140.2	76	82.9	74.1	4	-2.48	46.3352
	135.8	131.9	131.4	66.1	69.7	65	[K].FTDEKPVDRFDR.[D]	1xTMT6plex [K5]; 1xTMT6plex [N-Term]	1	3	1	E9QKB2	E9QKB2 [167-178]		1	1983.07	110.6	112.1	103.9	49.5	52.7	47.2	4	-0.85	48.1005
	104.7	96.4	124.3	90.4	89.1	95	[R].FHQLLDDESDPFDILR.[E]	1xTMT6plex [N-Term]	1	3	1	E9QKB2	E9QKB2 [28-43]		0	2189.11	20.4	19.6	23.5	16.2	16.1	16.5	3	-0.93	58.8286
							[R].RGEQQGWNDNRGTDVVLER.[A]	1xTMT6plex [N-Term]	1	3	3	E9QKB2	E9QKB2 [124-142]		2	2458.24							4	2.37	43.3661
	122.5	135.1	142.6	81.2	57.1	61.6	[R].KSLAASGAQQPDSPGGPQPPGQKR.[T]	2xTMT6plex [K1; K23]; 1xTMT6plex [N-Term]	1	3	1	E9QKB2	E9QKB2 [97-120]		2	3046.7	19.2	22.1	21.7	11.7	8.3	8.6	4	-2.93	39.9687
	138.8	133.6	116.6	70.4	69.5	71.1	[R].KSLAASGAQQPDSPGGPQPPGQK.[R]	2xTMT6plex [K1; K23]; 1xTMT6plex [N-Term]	1	3	1	E9QKB2	E9QKB2 [97-119]		1	2890.6	49.3	49.5	40.2	23	22.9	22.5	4	-7.88	43.1527
							[R].YRDDMVKEDYEDESHVFR.[K]	1xTMT6plex [K7]; 1xTMT6plex [N-Term]	1	2	1	E9QKB2	E9QKB2 [329-346]		2	2791.34							5	0.58	52.7511
	136.7	136.6	129.1	66.6	64.8	66.3	[K].FTDEKPVDR.[F]	1xTMT6plex [K5]; 1xTMT6plex [N-Term]	1	3	2	E9QKB2	E9QKB2 [167-175]		0	1564.87	377.3	393.6	346.1	169	166	163.2	3	-2.13	43.3832
							[K].SLAASGAQQPDSPGGPQPPGQKR.[T]	1xTMT6plex [K22]; 1xTMT6plex [N-Term]	1	3	2	E9QKB2	E9QKB2 [98-120]		1	2689.44							3	-1.02	41.2596
	122.7	116	135.5	81.8	69.6	74.4	[R].MEDSMGGCGIRPWGSGK.[D]	1xCarbamidomethyl [C8]; 1xOxidation [M1]; 1xTMT6plex [K17]; 1xTMT6plex [N-Term]	1	3	1	E9QKB2	E9QKB2 [228-244]		0	2299.1	120	118.5	128.7	73.6	63.2	64.9	3	-1.93	50.8719
	139.6	147.9	128.6	59.5	71.2	53.2	[R].RTENYGPR.[A]	1xTMT6plex [N-Term]	1	2	1	E9QKB2	E9QKB2 [383-390]		1	1221.65	40.6	44.9	36.3	15.9	19.2	13.8	3	3.16	25.8732
	117.7	122.2	121	81	86.9	71.1	[R].QADLPVEK.[F]	1xTMT6plex [K8]; 1xTMT6plex [N-Term]	1	3	2	E9QKB2	E9QKB2 [159-166]		0	1357.81	47.9	51.9	47.8	30.3	32.8	25.8	2	1.09	46.9894
							[R].DEAAAAASGAGHR.[G]	1xTMT6plex [N-Term]	1	2	1	E9QKB2	E9QKB2 [59-71]		0	1412.71							3	-5.97	28.6645
							[R].SPAVASGHRPGAGGR.[R]	1xTMT6plex [N-Term]	1	3	2	E9QKB2	E9QKB2 [75-89]		0	1605.88							4	-2.73	25.2614
							[K].EDYEDESHVFRK.[A]	1xTMT6plex [K12]; 1xTMT6plex [N-Term]	1	2	1	E9QKB2	E9QKB2 [336-347]		1	2012.01							4	-3.49	46.2754
	107.6	118.7	144.3	81.6	77.5	70.2	[R].AFDSFDQR.[G]	1xTMT6plex [N-Term]	1	3	2	E9QKB2	E9QKB2 [204-211]		0	1214.6	17.2	19.8	22.4	12	11.5	10	2	1.87	48.2319
							[R].YRDDMVK.[E]	1xTMT6plex [K7]; 1xTMT6plex [N-Term]	1	2	1	E9QKB2	E9QKB2 [329-335]		1	1384.77							3	-1.04	41.5457
							[R].RGEQQGWNDNR.[G]	1xTMT6plex [N-Term]	1	3	1	E9QKB2	E9QKB2 [124-134]		1	1588.78							3	-0.95	29.482
127.7	127.2	126	72.8	71.6	74.6	P62270	40S ribosomal protein S18 OS=Mus musculus OX=10090 GN=Rps18 PE=1 SV=3	45	15	29	15	152	17.7	10.99	3004	3122.4	2877.8	1574.3	1563.5	1563.2
	Abundances (Grouped): F1, 126	Abundances (Grouped): F1, 127	Abundances (Grouped): F1, 128	Abundances (Grouped): F1, 129	Abundances (Grouped): F1, 130	Abundances (Grouped): F1, 131	Annotated Sequence	Modifications	# Protein Groups	# Proteins	# PSMs	Master Protein Accessions	Positions in Master Proteins	Modifications in Master Proteins	# Missed Cleavages	Theo. MH+ [Da]	Abundance: F1: 126, Sample	Abundance: F1: 127, Sample	Abundance: F1: 128, Sample	Abundance: F1: 129, Sample	Abundance: F1: 130, Sample	Abundance: F1: 131, Sample	Charge (by Search Engine): Sequest HT	DeltaM [ppm] (by Search Engine): Sequest HT	RT [min] (by Search Engine): Sequest HT
	132.7	114.4	134.2	65.9	77	75.8	[K].YSQVLANGLDNK.[L]	1xTMT6plex [K12]; 1xTMT6plex [N-Term]	1	3	1	P62270	P62270 [95-106]		0	1780	76.4	68.7	75	34.9	41.1	38.9	3	-2.76	55.5942
	139.4	128.4	130.8	68.7	65	67.6	[R].AGELTEDEVER.[V]	1xTMT6plex [N-Term]	1	4	2	P62270	P62270 [56-66]		0	1476.74	93.2	89.6	84.9	42.2	40.3	40.3	2	-0.93	43.7562
	129.6	131.8	132.3	69.1	67.5	69.8	[K].DGKYSQVLANGLDNK.[L]	2xTMT6plex [K3; K15]; 1xTMT6plex [N-Term]	1	3	2	P62270	P62270 [92-106]		1	2309.31	568.2	603	563.2	278.5	274.6	272.6	3	-1.99	54.3997
	128	126.5	123.6	74.1	71.1	76.7	[R].VLNTNIDGRR.[K]	1xTMT6plex [N-Term]	1	5	2	P62270	P62270 [15-24]		1	1386.8	145.4	150	136.4	77.4	75	77.7	3	-4.71	41.0092
	119.9	121.5	116.3	81.1	82.3	78.9	[R].VITIMQNPR.[Q]	1xTMT6plex [N-Term]	1	4	2	P62270	P62270 [67-75]		0	1300.76	405.6	428.7	382	252.3	258.2	237.8	2	-2.32	53.5398
	74.6	89.8	99.7	122.7	77.1	136.2	[K].RAGELTEDEVER.[V]	1xTMT6plex [N-Term]	1	4	3	P62270	P62270 [55-66]		1	1632.84	12.1	15.2	15.7	18.3	11.6	19.7	2	-2.58	37.733
	142.5	143.6	136.2	57.4	60.6	59.7	[R].KADIDLTKR.[A]	2xTMT6plex [K1; K8]; 1xTMT6plex [N-Term]	1	4	1	P62270	P62270 [47-55]		2	1747.1	466.5	490.8	433.1	172.9	184.1	174.1	4	-4.35	42.8753
	129.2	133	130.5	68.2	65.4	73.7	[R].VLNTNIDGR.[R]	1xTMT6plex [N-Term]	1	5	4	P62270	P62270 [15-23]		0	1230.7	200.3	215.3	196.5	97.2	94.1	101.9	2	-2.63	46.6409
	112.4	114.4	118.8	86.3	82.6	85.6	[R].KADIDLTK.[R]	2xTMT6plex [K1; K8]; 1xTMT6plex [N-Term]	1	4	2	P62270	P62270 [47-54]		1	1591	222.8	236.7	228.7	157.4	151.9	151.3	3	-4.46	47.5531
	143.6	131.9	138.2	62.4	63	61	[K].ADIDLTKR.[A]	1xTMT6plex [K7]; 1xTMT6plex [N-Term]	1	4	2	P62270	P62270 [48-55]		1	1389.85	425.8	408.1	397.7	170	173.3	161.1	3	-1.75	44.8784
	112.3	119.1	104.9	88	82.4	93.4	[R].VITIMQNPR.[Q]	1xOxidation [M5]; 1xTMT6plex [N-Term]	1	4	1	P62270	P62270 [67-75]		0	1316.76	170.1	188.3	154.4	122.7	115.8	126.1	2	-3.37	44.4949
	109.6	124.5	104.1	81.4	88.2	92.3	[K].ADIDLTK.[R]	1xTMT6plex [K7]; 1xTMT6plex [N-Term]	1	4	1	P62270	P62270 [48-54]		0	1233.75	49	58.1	45.2	33.5	36.6	36.8	2	1.68	50.6209
							[R].RYAHVVLR.[K]	1xTMT6plex [N-Term]	1	4	1	P62270	P62270 [39-46]		1	1242.76							3	-6.67	34.7371
	114	108.6	112.2	88.1	78.6	98.5	[R].YAHVVLR.[K]	1xTMT6plex [N-Term]	1	4	3	P62270	P62270 [40-46]		0	1086.66	141.8	141	135.6	100.8	90.8	109.3	3	-4.98	39.9499
	117.2	121.1	132.4	77	75.9	76.5	[K].LREDLER.[L]	1xTMT6plex [N-Term]	1	3	1	P62270	P62270 [107-113]		1	1159.66	26.8	28.9	29.4	16.2	16.1	15.6	3	-1.96	38.9936
							[R].YAHVVLRK.[A]	1xTMT6plex [K8]; 1xTMT6plex [N-Term]	1	4	1	P62270	P62270 [40-47]		1	1443.92							4	-2.72	42.1995
127.6	142.4	122.1	61	66.2	80.6	P97466	Noggin OS=Mus musculus OX=10090 GN=Nog PE=2 SV=1	5	1	1	1	232	25.8	8.85	38.2	44.5	35.5	16.8	18.4	21.5
	Abundances (Grouped): F1, 126	Abundances (Grouped): F1, 127	Abundances (Grouped): F1, 128	Abundances (Grouped): F1, 129	Abundances (Grouped): F1, 130	Abundances (Grouped): F1, 131	Annotated Sequence	Modifications	# Protein Groups	# Proteins	# PSMs	Master Protein Accessions	Positions in Master Proteins	Modifications in Master Proteins	# Missed Cleavages	Theo. MH+ [Da]	Abundance: F1: 126, Sample	Abundance: F1: 127, Sample	Abundance: F1: 128, Sample	Abundance: F1: 129, Sample	Abundance: F1: 130, Sample	Abundance: F1: 131, Sample	Charge (by Search Engine): Sequest HT	DeltaM [ppm] (by Search Engine): Sequest HT	RT [min] (by Search Engine): Sequest HT
	127.6	142.4	122.1	61	66.2	80.6	[K].GLEFSEGLAQGK.[K]	1xTMT6plex [K12]; 1xTMT6plex [N-Term]	1	1	1	P97466	P97466 [122-133]		0	1693.95	38.2	44.5	35.5	16.8	18.4	21.5	2	0.47	57.4078
127.6	126.7	123.6	74.6	74.5	73	Q91ZP3	Phosphatidate phosphatase LPIN1 OS=Mus musculus OX=10090 GN=Lpin1 PE=1 SV=1	12	12	12	10	924	101.9	6.74	881.6	914.3	829.7	474.1	477.8	449.4
	Abundances (Grouped): F1, 126	Abundances (Grouped): F1, 127	Abundances (Grouped): F1, 128	Abundances (Grouped): F1, 129	Abundances (Grouped): F1, 130	Abundances (Grouped): F1, 131	Annotated Sequence	Modifications	# Protein Groups	# Proteins	# PSMs	Master Protein Accessions	Positions in Master Proteins	Modifications in Master Proteins	# Missed Cleavages	Theo. MH+ [Da]	Abundance: F1: 126, Sample	Abundance: F1: 127, Sample	Abundance: F1: 128, Sample	Abundance: F1: 129, Sample	Abundance: F1: 130, Sample	Abundance: F1: 131, Sample	Charge (by Search Engine): Sequest HT	DeltaM [ppm] (by Search Engine): Sequest HT	RT [min] (by Search Engine): Sequest HT
							[K].GHNTGEQPAQLGLATR.[I]	1xTMT6plex [N-Term]	1	5	1	Q91ZP3	Q91ZP3 [612-627]		0	1879							3	-3.55	39.926
	144.2	147.7	141.4	57.7	54.8	54.1	[R].NATIKEESKPEQCLTGK.[G]	1xCarbamidomethyl [C13]; 3xTMT6plex [K5; K9; K17]; 1xTMT6plex [N-Term]	1	5	1	Q91ZP3	Q91ZP3 [595-611]		1	2849.62	208	222.4	198	76.6	73.4	69.5	4	-1.43	46.1083
	133.1	131.3	115.4	89.1	64.7	66.4	[K].EESKPEQCLTGK.[G]	1xCarbamidomethyl [C8]; 2xTMT6plex [K4; K12]; 1xTMT6plex [N-Term]	1	5	1	Q91ZP3	Q91ZP3 [600-611]		0	2093.15	47.9	49.3	40.3	29.5	21.6	21.3	3	-1.33	44.2926
	108.3	102.3	114.4	98.7	87	89.2	[K].ATVESIMR.[D]	1xTMT6plex [N-Term]	1	4	1	Q91ZP3	Q91ZP3 [570-577]		0	1135.63	135.5	133.6	139	113.5	101	99.5	2	-1.76	50.2391
	111.9	91.1	96.4	95.6	115.3	89.6	[K].SDSELVSK.[S]	1xTMT6plex [K8]; 1xTMT6plex [N-Term]	1	5	1	Q91ZP3	Q91ZP3 [285-292]		0	1322.76	52.7	44.8	44.1	41.4	50.4	37.6	2	-3.38	43.8622
	139.3	131.6	132	63.1	72.8	61.2	[R].GYLHWVNER.[G]	1xTMT6plex [N-Term]	1	5	1	Q91ZP3	Q91ZP3 [769-777]		0	1402.74	36.5	36	33.6	15.2	17.7	14.3	3	-0.91	51.0631
	133.3	138	131.7	64.1	65.6	67.3	[K].QVGVSLNR.[I]	1xTMT6plex [N-Term]	1	5	1	Q91ZP3	Q91ZP3 [844-851]		0	1101.66	89.1	96.3	85.5	39.4	40.7	40.1	2	-2.4	41.6373
	132.6	136.8	140.8	58.4	71.8	59.5	[K].GELVQEHAK.[T]	1xTMT6plex [K9]; 1xTMT6plex [N-Term]	1	5	1	Q91ZP3	Q91ZP3 [859-867]		0	1468.85	19.5	21	20.1	7.9	9.8	7.8	3	-1.64	38.6805
	126.5	124.9	113.9	75.2	78	81.5	[K].DWTHQGIAK.[L]	1xTMT6plex [K9]; 1xTMT6plex [N-Term]	1	5	1	Q91ZP3	Q91ZP3 [733-741]		0	1513.85	185.6	191.2	162.2	101.4	106.2	106.5	3	-2.87	46.0371
	109	121.1	138.2	67.1	81.3	83.3	[R].AIGMADMTR.[G]	1xTMT6plex [N-Term]	2	7	1	Q91ZP3; Q99PI5	Q91ZP3 [760-768]; Q99PI5 [734-742]		0	1194.62	18.2	21.1	22.4	10.3	12.6	12.4	2	-3.64	49.0524
	107.8	143.4	136.6	62.8	83.4	66.1	[K].NGDPGGLPK.[Q]	1xTMT6plex [K9]; 1xTMT6plex [N-Term]	1	5	1	Q91ZP3	Q91ZP3 [451-459]		0	1312.76	29.1	40.4	35.8	15.6	20.9	15.9	2	0.76	42.3517
	146.6	137.4	123.6	62.4	62.4	67.7	[RK].MESQLK.[RK]	1xTMT6plex [K6]; 1xTMT6plex [N-Term]	2	13	1	Q91ZP3; F8VPM7	Q91ZP3 [116-121]; F8VPM7 [713-718]		0	1193.7	59.5	58.2	48.7	23.3	23.5	24.5	2	-2.8	44.0538
127.4	122.1	117.9	66.8	75.6	90.1	A0A1W2P738	Predicted gene 6993 OS=Mus musculus OX=10090 GN=Gm6993 PE=4 SV=1	10	1	1	1	69	8	5.72	45.4	45.4	40.8	21.9	25	28.6
	Abundances (Grouped): F1, 126	Abundances (Grouped): F1, 127	Abundances (Grouped): F1, 128	Abundances (Grouped): F1, 129	Abundances (Grouped): F1, 130	Abundances (Grouped): F1, 131	Annotated Sequence	Modifications	# Protein Groups	# Proteins	# PSMs	Master Protein Accessions	Positions in Master Proteins	Modifications in Master Proteins	# Missed Cleavages	Theo. MH+ [Da]	Abundance: F1: 126, Sample	Abundance: F1: 127, Sample	Abundance: F1: 128, Sample	Abundance: F1: 129, Sample	Abundance: F1: 130, Sample	Abundance: F1: 131, Sample	Charge (by Search Engine): Sequest HT	DeltaM [ppm] (by Search Engine): Sequest HT	RT [min] (by Search Engine): Sequest HT
	127.4	122.1	117.9	66.8	75.6	90.1	[-].MAGMAVR.[A]	1xTMT6plex [N-Term]; 1xMet-loss [N-Term]	1	1	1	A0A1W2P738	A0A1W2P738 [1-7]	A0A1W2P738 1xMet-loss [N-Term]	0	833.486	45.4	45.4	40.8	21.9	25	28.6	2	-2.95	35.6464
127.4	129.5	129.4	72.2	71.9	69.6	Q9ET26	E3 ubiquitin-protein ligase RNF114 OS=Mus musculus OX=10090 GN=Rnf114 PE=1 SV=2	33	7	9	7	229	25.7	7.03	483.2	512.6	476.6	251.9	253.1	235.3
	Abundances (Grouped): F1, 126	Abundances (Grouped): F1, 127	Abundances (Grouped): F1, 128	Abundances (Grouped): F1, 129	Abundances (Grouped): F1, 130	Abundances (Grouped): F1, 131	Annotated Sequence	Modifications	# Protein Groups	# Proteins	# PSMs	Master Protein Accessions	Positions in Master Proteins	Modifications in Master Proteins	# Missed Cleavages	Theo. MH+ [Da]	Abundance: F1: 126, Sample	Abundance: F1: 127, Sample	Abundance: F1: 128, Sample	Abundance: F1: 129, Sample	Abundance: F1: 130, Sample	Abundance: F1: 131, Sample	Charge (by Search Engine): Sequest HT	DeltaM [ppm] (by Search Engine): Sequest HT	RT [min] (by Search Engine): Sequest HT
	147.5	151	150.2	52.1	49.6	49.6	[K].NFDQEGLVEHCK.[L]	1xCarbamidomethyl [C11]; 1xTMT6plex [K12]; 1xTMT6plex [N-Term]	1	1	1	Q9ET26	Q9ET26 [151-162]		0	1933.98	318.6	340.6	315.1	103.5	99.5	95.5	3	4.54	48.4936
	101.9	113.8	121.6	92.5	83.3	86.8	[R].SANFMEHIQR.[R]	1xTMT6plex [N-Term]	1	1	1	Q9ET26	Q9ET26 [189-198]		0	1461.75	14.5	16.9	16.8	12.1	11	11	3	-3.89	46.4736
	93.4	104.9	89.2	90.8	130	91.6	[R].QIESIETSCHGCRK.[N]	2xCarbamidomethyl [C9; C12]; 1xTMT6plex [K14]; 1xTMT6plex [N-Term]	1	1	1	Q9ET26	Q9ET26 [84-97]		1	2163.11	15.1	17.7	14	13.5	19.5	13.2	4	-0.71	39.3721
	95.1	94.7	106.7	99	105	99.5	[R].DGAAQSAKPASETDPLSR.[F]	1xTMT6plex [K8]; 1xTMT6plex [N-Term]	1	2	2	Q9ET26	Q9ET26 [10-27]		0	2259.2	35.6	37	38.8	34.1	36.5	33.2	3	0.53	42.2862
	116.1	101.3	98.2	80.6	102.8	100.9	[K].DASLQPR.[N]	1xTMT6plex [N-Term]	1	1	1	Q9ET26	Q9ET26 [128-134]		0	1015.57	21.3	19.4	17.5	13.6	17.5	16.5	2	1.78	33.5439
	97	105.5	98.2	106.5	96.7	96.1	[R].SALAPGVR.[A]	1xTMT6plex [N-Term]	1	1	2	Q9ET26	Q9ET26 [70-77]		0	999.615	52	59	51.1	52.5	48.1	45.9	2	-1.96	38.2336
	111.2	89.8	102.2	104.7	96.4	95.6	[R].AVELER.[Q]	1xTMT6plex [N-Term]	1	1	1	Q9ET26	Q9ET26 [78-83]		0	945.557	26.1	22	23.3	22.6	21	20	2	-1.95	39.7073
127.4	131.5	132.4	68.4	71.3	69	D3YVJ1	Predicted gene 5901 OS=Mus musculus OX=10090 GN=Gm5901 PE=4 SV=1	2	1	1	1	333	36.6	9.07	268.1	288.9	270.6	132.3	139.3	129.4
	Abundances (Grouped): F1, 126	Abundances (Grouped): F1, 127	Abundances (Grouped): F1, 128	Abundances (Grouped): F1, 129	Abundances (Grouped): F1, 130	Abundances (Grouped): F1, 131	Annotated Sequence	Modifications	# Protein Groups	# Proteins	# PSMs	Master Protein Accessions	Positions in Master Proteins	Modifications in Master Proteins	# Missed Cleavages	Theo. MH+ [Da]	Abundance: F1: 126, Sample	Abundance: F1: 127, Sample	Abundance: F1: 128, Sample	Abundance: F1: 129, Sample	Abundance: F1: 130, Sample	Abundance: F1: 131, Sample	Charge (by Search Engine): Sequest HT	DeltaM [ppm] (by Search Engine): Sequest HT	RT [min] (by Search Engine): Sequest HT
	127.4	131.5	132.4	68.4	71.3	69	[K].GVLGPQK.[S]	1xTMT6plex [K7]; 1xTMT6plex [N-Term]	1	1	1	D3YVJ1	D3YVJ1 [206-212]		0	1156.75	268.1	288.9	270.6	132.3	139.3	129.4	2	-4.47	42.5726
127.4	127.4	131.6	71.1	68.7	73.9	A0A8V5KY98	Uncharacterized protein OS=Mus musculus OX=10090 PE=4 SV=1	47	9	13	9	154	17	10.27	548.5	572.8	550.3	281.6	274.5	283.6
	Abundances (Grouped): F1, 126	Abundances (Grouped): F1, 127	Abundances (Grouped): F1, 128	Abundances (Grouped): F1, 129	Abundances (Grouped): F1, 130	Abundances (Grouped): F1, 131	Annotated Sequence	Modifications	# Protein Groups	# Proteins	# PSMs	Master Protein Accessions	Positions in Master Proteins	Modifications in Master Proteins	# Missed Cleavages	Theo. MH+ [Da]	Abundance: F1: 126, Sample	Abundance: F1: 127, Sample	Abundance: F1: 128, Sample	Abundance: F1: 129, Sample	Abundance: F1: 130, Sample	Abundance: F1: 131, Sample	Charge (by Search Engine): Sequest HT	DeltaM [ppm] (by Search Engine): Sequest HT	RT [min] (by Search Engine): Sequest HT
	92.9	99.5	100.7	106.9	100.4	99.6	[R].CPWMGASPTHQPR.[R]	1xCarbamidomethyl [C1]; 1xTMT6plex [N-Term]	1	1	1	A0A8V5KY98	A0A8V5KY98 [67-79]		0	1753.85	62.8	70.2	66.1	66.5	63	60	3	-6.51	43.9002
	142.5	131.7	158.4	41.1	76.8	49.5	[R].SADVSLNSHHQPR.[E]	1xTMT6plex [N-Term]	1	1	2	A0A8V5KY98	A0A8V5KY98 [116-128]		0	1676.87	22.6	21.8	24.4	6	11.3	7	4	-4.91	30.2854
	134.4	137.5	156.6	58.4	57.9	55.2	[K].VWQPSALTCR.[C]	1xCarbamidomethyl [C9]; 1xTMT6plex [N-Term]	1	1	2	A0A8V5KY98	A0A8V5KY98 [57-66]		0	1446.77	26.5	28.3	30	10.6	10.6	9.7	2	-4.31	54.2345
	126.2	113.1	121.6	91.3	74.8	73	[R].RWYNTPGR.[L]	1xTMT6plex [N-Term]	1	1	3	A0A8V5KY98	A0A8V5KY98 [80-87]		1	1278.69	29.3	27.4	27.4	19.5	16.1	15.1	3	-1.77	40.0939
							[K].DYWNLPR.[C]	1xTMT6plex [N-Term]	1	1	1	A0A8V5KY98	A0A8V5KY98 [133-139]		0	1192.63							2	-2.79	56.338
	133.8	133.8	136.2	64	61.4	70.7	[R].KDYWNLPR.[C]	1xTMT6plex [K1]; 1xTMT6plex [N-Term]	1	1	1	A0A8V5KY98	A0A8V5KY98 [132-139]		1	1549.89	407.3	425.1	402.4	179	173.5	191.8	3	-7.1	51.7659
							[K].AHVTPLSDLEGSG.[-]	1xTMT6plex [N-Term]	1	1	1	A0A8V5KY98	A0A8V5KY98 [142-154]		0	1511.79							2	0.51	52.709
							[R].CPSPCAGK.[V]	2xCarbamidomethyl [C1; C5]; 1xTMT6plex [K8]; 1xTMT6plex [N-Term]	1	1	1	A0A8V5KY98	A0A8V5KY98 [49-56]		0	1334.7							2	-0.09	35.3819
							[R].WYNTPGR.[L]	1xTMT6plex [N-Term]	1	1	1	A0A8V5KY98	A0A8V5KY98 [81-87]		0	1122.59							2	-5.5	46.2124
127.2	120.8	123.8	73.8	76.7	77.7	Q9JL56	Glycerophosphodiester phosphodiesterase 1 OS=Mus musculus OX=10090 GN=Gde1 PE=1 SV=1	15	5	5	5	331	37.6	6.9	100.1	99.2	94.6	53.4	56	54.5
	Abundances (Grouped): F1, 126	Abundances (Grouped): F1, 127	Abundances (Grouped): F1, 128	Abundances (Grouped): F1, 129	Abundances (Grouped): F1, 130	Abundances (Grouped): F1, 131	Annotated Sequence	Modifications	# Protein Groups	# Proteins	# PSMs	Master Protein Accessions	Positions in Master Proteins	Modifications in Master Proteins	# Missed Cleavages	Theo. MH+ [Da]	Abundance: F1: 126, Sample	Abundance: F1: 127, Sample	Abundance: F1: 128, Sample	Abundance: F1: 129, Sample	Abundance: F1: 130, Sample	Abundance: F1: 131, Sample	Charge (by Search Engine): Sequest HT	DeltaM [ppm] (by Search Engine): Sequest HT	RT [min] (by Search Engine): Sequest HT
							[R].GGSHDAPENTLAAIR.[Q]	1xTMT6plex [N-Term]	1	3	1	Q9JL56	Q9JL56 [72-86]		0	1737.91							3	2.35	44.1007
	134.3	124.9	125.6	69.8	72.6	72.9	[K].GHADMASAALK.[N]	1xTMT6plex [K11]; 1xTMT6plex [N-Term]	1	2	1	Q9JL56	Q9JL56 [177-187]		0	1529.85	33.5	32.5	30.4	16	16.8	16.2	3	-4.89	41.6814
	126.4	112.7	113.1	84.2	85.3	78.3	[K].EAVTECLR.[H]	1xCarbamidomethyl [C6]; 1xTMT6plex [N-Term]	1	2	1	Q9JL56	Q9JL56 [159-166]		0	1206.63	44.9	41.8	39	27.5	28.1	24.8	2	0.15	42.4579
	119	130.9	142.4	59	65.6	83.1	[R].NEFPDERIPTLK.[E]	1xTMT6plex [K12]; 1xTMT6plex [N-Term]	1	2	1	Q9JL56	Q9JL56 [147-158]		1	1917.08	21.7	24.9	25.2	9.9	11.1	13.5	3	2.5	55.4478
							[R].LRNEFPDER.[I]	1xTMT6plex [N-Term]	1	2	1	Q9JL56	Q9JL56 [145-153]		1	1404.74							3	-0.97	43.2593
127.2	132.3	135.3	70.3	65.5	69.4	Q8C5V0	Spermatogenesis-associated protein 32 OS=Mus musculus OX=10090 GN=Spata32 PE=1 SV=1	6	2	2	2	334	37.2	5.63	36.4	39.5	37.6	18.5	17.4	17.7
	Abundances (Grouped): F1, 126	Abundances (Grouped): F1, 127	Abundances (Grouped): F1, 128	Abundances (Grouped): F1, 129	Abundances (Grouped): F1, 130	Abundances (Grouped): F1, 131	Annotated Sequence	Modifications	# Protein Groups	# Proteins	# PSMs	Master Protein Accessions	Positions in Master Proteins	Modifications in Master Proteins	# Missed Cleavages	Theo. MH+ [Da]	Abundance: F1: 126, Sample	Abundance: F1: 127, Sample	Abundance: F1: 128, Sample	Abundance: F1: 129, Sample	Abundance: F1: 130, Sample	Abundance: F1: 131, Sample	Charge (by Search Engine): Sequest HT	DeltaM [ppm] (by Search Engine): Sequest HT	RT [min] (by Search Engine): Sequest HT
	127.2	132.3	135.3	70.3	65.5	69.4	[K].TATIQGEVK.[F]	1xTMT6plex [K9]; 1xTMT6plex [N-Term]	1	1	1	Q8C5V0	Q8C5V0 [281-289]		0	1404.85	36.4	39.5	37.6	18.5	17.4	17.7	2	0.34	44.0607
							[K].LSSPQPQRND.[-]	1xTMT6plex [N-Term]	1	1	1	Q8C5V0	Q8C5V0 [325-334]		1	1370.72							2	-1.86	35.0122
127.2	129.4	126.1	74.1	72.1	71.1	P62918	60S ribosomal protein L8 OS=Mus musculus OX=10090 GN=Rpl8 PE=1 SV=2	30	13	17	13	257	28	11.03	1482.5	1574.4	1427.1	793.9	779.9	738.4
	Abundances (Grouped): F1, 126	Abundances (Grouped): F1, 127	Abundances (Grouped): F1, 128	Abundances (Grouped): F1, 129	Abundances (Grouped): F1, 130	Abundances (Grouped): F1, 131	Annotated Sequence	Modifications	# Protein Groups	# Proteins	# PSMs	Master Protein Accessions	Positions in Master Proteins	Modifications in Master Proteins	# Missed Cleavages	Theo. MH+ [Da]	Abundance: F1: 126, Sample	Abundance: F1: 127, Sample	Abundance: F1: 128, Sample	Abundance: F1: 129, Sample	Abundance: F1: 130, Sample	Abundance: F1: 131, Sample	Charge (by Search Engine): Sequest HT	DeltaM [ppm] (by Search Engine): Sequest HT	RT [min] (by Search Engine): Sequest HT
	126.6	136.6	130.4	71.5	67.4	67.5	[K].DIIHDPGRGAPLAK.[V]	1xTMT6plex [K14]; 1xTMT6plex [N-Term]	1	1	1	P62918	P62918 [47-60]		1	1918.13	114.6	129.1	114.6	59.5	56.6	54.5	4	-0.26	45.3719
							[R].ASGNYATVISHNPETK.[K]	1xTMT6plex [K16]; 1xTMT6plex [N-Term]	1	1	1	P62918	P62918 [129-144]		0	2147.15							3	-0.31	46.3676
	111.8	107.2	115.2	89.5	91.1	85.1	[R].ASGNYATVISHNPETKK.[T]	2xTMT6plex [K16; K17]; 1xTMT6plex [N-Term]	1	1	2	P62918	P62918 [129-145]		1	2504.41	151.7	151.8	151.8	111.7	114.7	102.9	4	-8.3	44.6654
	109.4	99.4	90	67.2	90.4	143.5	[R].AVVGVVAGGGR.[I]	1xTMT6plex [N-Term]	1	1	1	P62918	P62918 [164-174]		0	1170.72	15.4	14.6	12.3	8.7	11.8	18	2	-2.42	44.0078
	129.2	137.8	124.7	67.6	66.3	74.4	[K].GIVKDIIHDPGR.[G]	1xTMT6plex [K4]; 1xTMT6plex [N-Term]	1	1	1	P62918	P62918 [43-54]		1	1778.07	149.4	166.4	140	71.9	71.2	76.7	4	-5.7	48.2325
	166.4	174	142.9	56.9	36.7	23.1	[R].LRAVDFAER.[H]	1xTMT6plex [N-Term]	1	1	1	P62918	P62918 [29-37]		1	1305.75	28.3	30.9	23.6	8.9	5.8	3.5	3	-3.51	48.2539
	122.9	131.7	118.1	85.9	84	57.5	[R].AVVGVVAGGGRIDKPILK.[A]	2xTMT6plex [K14; K18]; 1xTMT6plex [N-Term]	1	1	1	P62918	P62918 [164-181]		1	2436.56	37.2	41.6	34.7	23.9	23.6	15.5	4	-1.47	55.0251
	124.9	140.2	129.6	68.3	71.3	65.7	[K].VVFRDPYR.[F]	1xTMT6plex [N-Term]	1	1	2	P62918	P62918 [61-68]		1	1280.73	136.6	160	137.6	68.7	72.4	64.1	3	-5.5	47.6401
							[K].DIIHDPGR.[G]	1xTMT6plex [N-Term]	1	1	3	P62918	P62918 [47-54]		0	1151.64							3	-0.78	37.0278
	134.5	136.7	136.9	66.5	61.6	63.9	[R].KVGLIAAR.[R]	1xTMT6plex [K1]; 1xTMT6plex [N-Term]	1	1	1	P62918	P62918 [234-241]		1	1285.87	157.3	166.8	155.4	71.5	66.8	66.6	3	-1.63	43.7207
							[K].VGLIAAR.[R]	1xTMT6plex [N-Term]	1	1	1	P62918	P62918 [235-241]		0	928.614							2	-1.07	47.169
	129.1	127.5	126.3	74.9	71.8	70.5	[R].IDKPILK.[A]	2xTMT6plex [K3; K7]; 1xTMT6plex [N-Term]	1	1	1	P62918	P62918 [175-181]		0	1514.03	692	713.2	657.1	369.1	357	336.6	3	-5.81	49.5967
							[R].AVDFAER.[H]	1xTMT6plex [N-Term]	1	1	1	P62918	P62918 [31-37]		0	1036.56							2	0.76	44.6659
127.2	101.6	103	82.5	91.5	94.2	E9Q559	Calcium-transporting ATPase OS=Mus musculus OX=10090 GN=Atp2a3 PE=1 SV=1	9	9	14	2	1026	112.4	6.09	25.3	21.1	19.9	15.1	16.9	16.7
	Abundances (Grouped): F1, 126	Abundances (Grouped): F1, 127	Abundances (Grouped): F1, 128	Abundances (Grouped): F1, 129	Abundances (Grouped): F1, 130	Abundances (Grouped): F1, 131	Annotated Sequence	Modifications	# Protein Groups	# Proteins	# PSMs	Master Protein Accessions	Positions in Master Proteins	Modifications in Master Proteins	# Missed Cleavages	Theo. MH+ [Da]	Abundance: F1: 126, Sample	Abundance: F1: 127, Sample	Abundance: F1: 128, Sample	Abundance: F1: 129, Sample	Abundance: F1: 130, Sample	Abundance: F1: 131, Sample	Charge (by Search Engine): Sequest HT	DeltaM [ppm] (by Search Engine): Sequest HT	RT [min] (by Search Engine): Sequest HT
	103.8	112	112.2	91.3	90.5	90.2	[R].SLPSVETLGCTSVICSDKTGTLTTNQMSVCR.[M]	3xCarbamidomethyl [C10; C15; C30]; 1xTMT6plex [K18]; 1xTMT6plex [N-Term]	2	5	1	E9Q559; O55143	E9Q559 [335-365]; O55143 [335-365]		1	3860.93	113.7	128	119.3	92	92	88.1	4	-2.87	58.2686
	81.3	83.8	86.1	114.8	116.9	117.1	[R].SLPSVETLGCTSVICSDK.[T]	2xCarbamidomethyl [C10; C15]; 1xTMT6plex [K18]; 1xTMT6plex [N-Term]	2	6	1	E9Q559; O55143	E9Q559 [335-352]; O55143 [335-352]		0	2411.26	282.7	304.4	290.8	367.2	377.2	363.2	3	-1.61	58.3959
	85	93.5	92.1	108.7	120.2	100.4	[K].VGEATETALTCLVEK.[M]	1xCarbamidomethyl [C11]; 1xTMT6plex [K15]; 1xTMT6plex [N-Term]	2	5	1	E9Q559; O55143	E9Q559 [437-451]; O55143 [437-451]		0	2079.14	94.2	108.1	99.1	110.8	123.6	99.2	2	-1.49	58.7483
	107	100.4	94.7	97.3	99.2	101.3	[K].TGTLTTNQMSVCR.[M]	1xCarbamidomethyl [C12]; 1xTMT6plex [N-Term]	2	5	3	E9Q559; O55143	E9Q559 [353-365]; O55143 [353-365]		0	1697.85	130	127.4	111.8	108.8	111.9	109.8	2	0.38	44.8456
	127.2	101.6	103	82.5	91.5	94.2	[R].LHEFTISGTTYTPEGEVR.[Q]	1xTMT6plex [N-Term]	1	4	1	E9Q559	E9Q559 [379-396]		0	2266.16	25.3	21.1	19.9	15.1	16.9	16.7	3	-1.81	55.495
	94.3	87.6	92.7	105	113.4	107.2	[K].EFTLEFSR.[D]	1xTMT6plex [N-Term]	2	6	2	E9Q559; O55143	E9Q559 [482-489]; O55143 [482-489]		0	1257.67	411	398.4	392.3	420.9	458.6	416.5	2	0.41	58.4223
							[R].SQMAAVEPERTPLQR.[K]	1xTMT6plex [N-Term]	1	4	1	E9Q559	E9Q559 [237-251]		1	1942.04							3	-1.53	44.6327
	86.6	84.6	87.6	90.1	91.3	159.8	[RK].KEFTLEFSR.[D]	1xTMT6plex [K1]; 1xTMT6plex [N-Term]	2	6	1	E9Q559; O55143	E9Q559 [481-489]; O55143 [481-489]		1	1614.93	248.2	253	243.9	237.4	242.9	408.2	3	-3.67	55.0479
	98.6	70.4	89.6	106.5	125.1	109.9	[K].EYEPEMGK.[V]	1xTMT6plex [K8]; 1xTMT6plex [N-Term]	2	6	1	E9Q559; O55143	E9Q559 [121-128]; O55143 [121-128]		0	1440.74	31.5	23.5	27.8	31.3	37.1	31.3	2	1.77	46.8163
							[K].TGTLTTNQMSVCR.[M]	1xCarbamidomethyl [C12]; 1xOxidation [M9]; 1xTMT6plex [N-Term]	2	5	1	E9Q559; O55143	E9Q559 [353-365]; O55143 [353-365]		0	1713.85							3	-1.83	38.1913
							[K].EYEPEMGK.[V]	1xOxidation [M6]; 1xTMT6plex [K8]; 1xTMT6plex [N-Term]	2	6	1	E9Q559; O55143	E9Q559 [121-128]; O55143 [121-128]		0	1456.74							2	1.11	40.3325
127.1	118.2	123.9	89.5	67.2	74.1	Q8BTX9	Inactive hydroxysteroid dehydrogenase-like protein 1 OS=Mus musculus OX=10090 GN=Hsdl1 PE=1 SV=1	8	3	3	3	330	36.8	8.48	20.4	19.8	19.3	13.2	10	10.6
	Abundances (Grouped): F1, 126	Abundances (Grouped): F1, 127	Abundances (Grouped): F1, 128	Abundances (Grouped): F1, 129	Abundances (Grouped): F1, 130	Abundances (Grouped): F1, 131	Annotated Sequence	Modifications	# Protein Groups	# Proteins	# PSMs	Master Protein Accessions	Positions in Master Proteins	Modifications in Master Proteins	# Missed Cleavages	Theo. MH+ [Da]	Abundance: F1: 126, Sample	Abundance: F1: 127, Sample	Abundance: F1: 128, Sample	Abundance: F1: 129, Sample	Abundance: F1: 130, Sample	Abundance: F1: 131, Sample	Charge (by Search Engine): Sequest HT	DeltaM [ppm] (by Search Engine): Sequest HT	RT [min] (by Search Engine): Sequest HT
							[R].ALQYEYASK.[G]	1xTMT6plex [K9]; 1xTMT6plex [N-Term]	1	2	1	Q8BTX9	Q8BTX9 [231-239]		0	1530.86							2	-1.05	50.4944
							[R].GREIYAPIR.[E]	1xTMT6plex [N-Term]	1	2	1	Q8BTX9	Q8BTX9 [129-137]		1	1303.77							3	-0.8	41.3591
	127.1	118.2	123.9	89.5	67.2	74.1	[K].AYLDHFSR.[A]	1xTMT6plex [N-Term]	1	2	1	Q8BTX9	Q8BTX9 [223-230]		0	1237.65	20.4	19.8	19.3	13.2	10	10.6	3	-3.06	46.7648
127.1	90.9	96	94.5	97.1	94.3	E9Q7B0	procollagen-proline 4-dioxygenase OS=Mus musculus OX=10090 GN=P4ha1 PE=1 SV=1	16	6	6	6	454	51.7	6.71	751	560.7	550.6	513.4	532.3	496.5
	Abundances (Grouped): F1, 126	Abundances (Grouped): F1, 127	Abundances (Grouped): F1, 128	Abundances (Grouped): F1, 129	Abundances (Grouped): F1, 130	Abundances (Grouped): F1, 131	Annotated Sequence	Modifications	# Protein Groups	# Proteins	# PSMs	Master Protein Accessions	Positions in Master Proteins	Modifications in Master Proteins	# Missed Cleavages	Theo. MH+ [Da]	Abundance: F1: 126, Sample	Abundance: F1: 127, Sample	Abundance: F1: 128, Sample	Abundance: F1: 129, Sample	Abundance: F1: 130, Sample	Abundance: F1: 131, Sample	Charge (by Search Engine): Sequest HT	DeltaM [ppm] (by Search Engine): Sequest HT	RT [min] (by Search Engine): Sequest HT
	104.6	112.1	116.2	92.7	85.9	88.5	[R].HAACPVLVGNK.[W]	1xCarbamidomethyl [C4]; 1xTMT6plex [K11]; 1xTMT6plex [N-Term]	1	2	1	E9Q7B0	E9Q7B0 [420-430]		0	1623.94	95	106.3	102.5	77.5	72.4	71.7	3	-4.98	41.3865
	98	99.3	96.7	99	105.3	101.7	[R].KDEPDAFRELGTGNR.[I]	1xTMT6plex [K1]; 1xTMT6plex [N-Term]	1	2	1	E9Q7B0	E9Q7B0 [355-369]		2	2163.16	58.9	62.3	56.4	54.7	58.7	54.5	4	-0.82	47.6952
	107.4	102.9	101.6	96.2	93.2	98.7	[R].LQDTYNLDTNTISK.[G]	1xTMT6plex [K14]; 1xTMT6plex [N-Term]	1	2	1	E9Q7B0	E9Q7B0 [137-150]		0	2084.13	125.8	125.8	115.6	103.6	101.3	103	3	1.27	56.4794
							[R].QYFPNDEDQVGAAK.[A]	1xTMT6plex [K14]; 1xTMT6plex [N-Term]	1	2	1	E9Q7B0	E9Q7B0 [119-132]		0	2040.04							2	0.83	52.0731
	146.1	79.1	88.1	93.6	100.2	93	[K].DLVTSLK.[D]	1xTMT6plex [K7]; 1xTMT6plex [N-Term]	1	2	1	E9Q7B0	E9Q7B0 [37-43]		0	1233.78	471.3	266.3	276.1	277.6	299.9	267.3	2	-5.06	53.9145
							[K].GIAVDYLPER.[Q]	1xTMT6plex [N-Term]	1	2	1	E9Q7B0	E9Q7B0 [197-206]		0	1361.76							2	-2.42	55.9565
127.1	106	88.1	122	78.6	78.3	Q80W69	Uncharacterized protein C12orf71 homolog OS=Mus musculus OX=10090 PE=2 SV=1	9	2	2	2	301	34.7	5.95	16.2	14.1	10.9	14.3	9.3	8.9
	Abundances (Grouped): F1, 126	Abundances (Grouped): F1, 127	Abundances (Grouped): F1, 128	Abundances (Grouped): F1, 129	Abundances (Grouped): F1, 130	Abundances (Grouped): F1, 131	Annotated Sequence	Modifications	# Protein Groups	# Proteins	# PSMs	Master Protein Accessions	Positions in Master Proteins	Modifications in Master Proteins	# Missed Cleavages	Theo. MH+ [Da]	Abundance: F1: 126, Sample	Abundance: F1: 127, Sample	Abundance: F1: 128, Sample	Abundance: F1: 129, Sample	Abundance: F1: 130, Sample	Abundance: F1: 131, Sample	Charge (by Search Engine): Sequest HT	DeltaM [ppm] (by Search Engine): Sequest HT	RT [min] (by Search Engine): Sequest HT
							[R].KRDQVEHDPEQFSK.[L]	2xTMT6plex [K1; K14]; 1xTMT6plex [N-Term]	1	1	1	Q80W69	Q80W69 [76-89]		2	2430.33							5	-3.68	38.9774
	127.1	106	88.1	122	78.6	78.3	[R].QRPSQATNTWHQK.[A]	1xTMT6plex [K13]; 1xTMT6plex [N-Term]	1	1	1	Q80W69	Q80W69 [272-284]		0	2040.11	16.2	14.1	10.9	14.3	9.3	8.9	4	-1.37	33.8081
127.1	123.4	130.3	70.4	70.1	78.8	P35441	Thrombospondin-1 OS=Mus musculus OX=10090 GN=Thbs1 PE=1 SV=1	7	8	10	8	1170	129.6	4.96	367.4	372.3	365.7	187.1	188.1	203.1
	Abundances (Grouped): F1, 126	Abundances (Grouped): F1, 127	Abundances (Grouped): F1, 128	Abundances (Grouped): F1, 129	Abundances (Grouped): F1, 130	Abundances (Grouped): F1, 131	Annotated Sequence	Modifications	# Protein Groups	# Proteins	# PSMs	Master Protein Accessions	Positions in Master Proteins	Modifications in Master Proteins	# Missed Cleavages	Theo. MH+ [Da]	Abundance: F1: 126, Sample	Abundance: F1: 127, Sample	Abundance: F1: 128, Sample	Abundance: F1: 129, Sample	Abundance: F1: 130, Sample	Abundance: F1: 131, Sample	Charge (by Search Engine): Sequest HT	DeltaM [ppm] (by Search Engine): Sequest HT	RT [min] (by Search Engine): Sequest HT
	123.8	134.7	158.6	69.1	63.1	50.7	[K].QVTQSYWDTNPTR.[A]	1xTMT6plex [N-Term]	1	2	2	P35441	P35441 [1042-1054]		0	1824.91	22.2	25.2	27.6	11.4	10.5	8.1	2	0.14	50.7048
	128.1	125.5	132.7	68.4	70.3	75	[R].AQGYSGLSVK.[V]	1xTMT6plex [K10]; 1xTMT6plex [N-Term]	1	2	1	P35441	P35441 [1055-1064]		0	1467.86	200.4	204.9	201.5	98.4	102	104.6	2	-0.72	48.0234
	145.9	127.9	114.7	67.8	67.7	76	[K].GTSQNDPNWVVR.[H]	1xTMT6plex [N-Term]	1	2	1	P35441	P35441 [969-980]		0	1601.82	35.1	32.1	26.8	15	15.1	16.3	2	0.92	47.0278
	123.2	116.7	122	75	70.7	92.5	[K].IMADSGPIYDK.[T]	1xTMT6plex [K11]; 1xTMT6plex [N-Term]	1	2	1	P35441	P35441 [1131-1141]		0	1667.91	90.7	89.7	87.2	50.8	48.3	60.7	2	-1.58	55.9388
							[K].EVPDACFNHNGEHR.[C]	1xCarbamidomethyl [C6]; 1xTMT6plex [N-Term]	1	2	2	P35441	P35441 [594-607]		0	1910.88							4	0.05	37.7948
							[R].GTLLAVER.[K]	1xTMT6plex [N-Term]	1	2	1	P35441	P35441 [102-109]		0	1087.67							2	-2.49	48.5303
							[R].TCHIQECDK.[R]	2xCarbamidomethyl [C2; C7]; 1xTMT6plex [K9]; 1xTMT6plex [N-Term]	1	2	1	P35441	P35441 [422-430]		0	1648.82							3	-1.79	34.4966
	111.2	114.4	136.2	73.2	77	88	[R].TLWHDPR.[H]	1xTMT6plex [N-Term]	1	2	1	P35441	P35441 [1092-1098]		0	1153.63	19	20.4	22.6	11.5	12.2	13.4	3	-2.73	43.6657
126.8	125.4	124.7	74.4	74.2	74.6	P17182	Alpha-enolase OS=Mus musculus OX=10090 GN=Eno1 PE=1 SV=3	71	27	44	25	434	47.1	6.8	7784.7	8034.6	7437.2	4200	4226.3	4082.2
	Abundances (Grouped): F1, 126	Abundances (Grouped): F1, 127	Abundances (Grouped): F1, 128	Abundances (Grouped): F1, 129	Abundances (Grouped): F1, 130	Abundances (Grouped): F1, 131	Annotated Sequence	Modifications	# Protein Groups	# Proteins	# PSMs	Master Protein Accessions	Positions in Master Proteins	Modifications in Master Proteins	# Missed Cleavages	Theo. MH+ [Da]	Abundance: F1: 126, Sample	Abundance: F1: 127, Sample	Abundance: F1: 128, Sample	Abundance: F1: 129, Sample	Abundance: F1: 130, Sample	Abundance: F1: 131, Sample	Charge (by Search Engine): Sequest HT	DeltaM [ppm] (by Search Engine): Sequest HT	RT [min] (by Search Engine): Sequest HT
	154.9	125.9	135.4	59.8	64.1	60	[R].SGETEDTFIADLVVGLCTGQIK.[T]	1xCarbamidomethyl [C17]; 1xTMT6plex [K22]; 1xTMT6plex [N-Term]	2	7	1	P17182; P21550	P17182 [373-394]; P21550 [373-394]		0	2811.49	31	26.3	26.3	11	11.9	10.7	3	-0.3	59.4269
	127.7	136.7	127.3	70.4	68.4	69.4	[K].GVSQAVEHINK.[T]	1xTMT6plex [K11]; 1xTMT6plex [N-Term]	1	2	2	P17182	P17182 [61-71]		0	1639.95	152.4	170.3	147.5	77.3	75.7	73.8	2	-1.02	44.3736
	103.2	109.7	113.7	91.3	94.7	87.4	[R].HIADLAGNPEVILPVPAFNVINGGSHAGNK.[L]	1xTMT6plex [K30]; 1xTMT6plex [N-Term]	1	3	1	P17182	P17182 [133-162]		0	3479.92	144.2	160	154.2	117.3	122.7	108.8	4	-5.96	58.6062
	116.5	116.2	120.8	83.8	81.5	81.2	[K].FTASAGIQVVGDDLTVTNPK.[R]	1xTMT6plex [K20]; 1xTMT6plex [N-Term]	1	2	1	P17182	P17182 [307-326]		0	2491.38	154.2	160.5	155.2	102	100.1	95.8	3	-1.11	58.6082
	138.3	134	139.2	61.5	62.7	64.2	[R].GNPTVEVDLYTAK.[G]	1xTMT6plex [K13]; 1xTMT6plex [N-Term]	1	11	3	P17182	P17182 [16-28]		0	1865.04	318.9	322.5	311.7	130.3	134.2	132	2	1.02	56.471
	144.7	135.7	140	62.2	65.7	51.7	[K].KVNVVEQEK.[I]	2xTMT6plex [K1; K9]; 1xTMT6plex [N-Term]	1	2	1	P17182	P17182 [81-89]		1	1760.09	169.7	166.1	159.4	67.1	71.5	54.1	3	-3.51	42.6983
	123.9	132.7	125.2	73.3	72.4	72.5	[K].LAMQEFMILPVGASSFR.[E]	1xTMT6plex [N-Term]	1	3	1	P17182	P17182 [163-179]		0	2126.13	220.3	246.2	216.1	119.9	119.4	114.8	2	-6.63	59.2109
	136.1	130.7	134.6	64.2	67.6	66.8	[K].VNQIGSVTESLQACK.[L]	1xCarbamidomethyl [C14]; 1xTMT6plex [K15]; 1xTMT6plex [N-Term]	1	2	1	P17182	P17182 [344-358]		0	2092.15	178.8	179.3	171.8	77.6	82.4	78.3	2	-3.31	56.7421
	137	138.1	124.3	75.4	60.4	64.8	[R].AAVPSGASTGIYEALELRDNDKTR.[F]	1xTMT6plex [K22]; 1xTMT6plex [N-Term]	1	4	1	P17182	P17182 [33-56]		2	2992.61	55.7	58.6	49.1	28.2	22.8	23.5	4	-1.47	57.2253
	103.3	108.1	98.9	96.8	88.7	104.3	[K].LAQSNGWGVMVSHR.[S]	1xOxidation [M10]; 1xTMT6plex [N-Term]	2	4	1	P17182; P21550	P17182 [359-372]; P21550 [359-372]		0	1786.92	93.9	102.6	87.3	80.9	74.8	84.5	3	-4.1	47.9578
							[K].AGYTDQVVIGMDVAASEFYR.[S]	1xOxidation [M11]; 1xTMT6plex [N-Term]	1	2	1	P17182	P17182 [234-253]		0	2437.19							3	8.76	57.1264
	123.8	113.9	117.8	80	82.4	82.1	[K].DATNVGDEGGFAPNILENK.[E-]	1xTMT6plex [K19]; 1xTMT6plex [N-Term]	1	3	1	P17182	P17182 [203-221]		0	2419.25	185.8	178.5	171.7	110.5	114.8	109.9	3	-2.31	58.3838
	141.4	150.3	148.9	50.2	53.7	55.5	[K].DATNVGDEGGFAPNILENKEALELLK.[T]	2xTMT6plex [K19; K26]; 1xTMT6plex [N-Term]	1	2	1	P17182	P17182 [203-228]		1	3444.88	320.8	355.9	327.9	104.8	113	112.2	3	-1.57	58.7759
	127.2	129.1	123.1	74.3	73.4	73	[K].LMIEMDGTENK.[S]	1xTMT6plex [K11]; 1xTMT6plex [N-Term]	1	4	2	P17182	P17182 [93-103]		0	1738.91	552.1	585.3	518.8	296.6	295.8	282.4	2	-2.62	58.1174
	129.6	130.1	125.1	71.2	73	71.1	[R].IGAEVYHNLK.[N]	1xTMT6plex [K10]; 1xTMT6plex [N-Term]	1	3	2	P17182	P17182 [184-193]		0	1601.94	479	501.9	448.9	241.9	250.4	234.2	3	-3.78	51.9012
	97.6	102.6	100	97.9	102.9	99.1	[K].LAQSNGWGVMVSHR.[S]	1xTMT6plex [N-Term]	2	4	2	P17182; P21550	P17182 [359-372]; P21550 [359-372]		0	1770.93	349.6	383.7	348.1	322.5	342.1	316.5	3	0.72	53.896
	126.6	118.5	122.8	74.2	78.7	79.2	[K].LMIEMDGTENK.[S]	1xOxidation [M]; 1xTMT6plex [K11]; 1xTMT6plex [N-Term]	1	4	6	P17182	P17182 [93-103]		0	1754.91	227.3	222.2	214.2	122.5	131.1	126.8	3	-0.09	55.1555
	132.1	125.5	125.4	71.6	71.2	74.3	[K].VNVVEQEKIDK.[L]	2xTMT6plex [K8; K11]; 1xTMT6plex [N-Term]	1	4	1	P17182	P17182 [82-92]		1	1988.2	245.1	243	225.8	122.1	122.5	122.9	3	0.17	50.2923
	127.7	124.1	121.9	73	79.7	73.6	[R].SGKYDLDFKSPDDPSR.[Y]	2xTMT6plex [K3; K9]; 1xTMT6plex [N-Term]	1	2	1	P17182	P17182 [254-269]		2	2514.34	319.3	324	296.1	167.9	184.9	164.1	4	-6.24	50.5091
	126.5	129.1	135.1	66.7	68.2	74.4	[R].YITPDQLADLYK.[S]	1xTMT6plex [K12]; 1xTMT6plex [N-Term]	1	2	1	P17182	P17182 [270-281]		0	1898.07	516.4	550.1	535.4	250.4	258.4	270.7	2	-3.94	58.7061
	135.6	124.2	125.6	69.9	72.6	72	[K].YDLDFKSPDDPSR.[Y]	1xTMT6plex [K6]; 1xTMT6plex [N-Term]	1	2	1	P17182	P17182 [257-269]		1	2013.03	168.3	160.9	151.3	79.8	83.6	79.6	3	0.36	54.3782
	124.2	119.1	118.2	82.1	76	80.3	[K].TIAPALVSK.[K]	1xTMT6plex [K9]; 1xTMT6plex [N-Term]	1	2	2	P17182	P17182 [72-80]		0	1357.88	712.1	712.9	657.9	433.1	404.2	410.6	2	-0.83	53.0767
	131.7	123.9	131.9	73.6	69.9	69	[R].IEEELGSK.[A]	1xTMT6plex [K8]; 1xTMT6plex [N-Term]	1	2	2	P17182	P17182 [413-420]		0	1362.79	697.2	684.8	677.8	358.5	343.3	325.6	2	1.09	52.1134
	117.3	121.1	117.7	79.9	79.7	84.3	[K].TIAPALVSKK.[V]	2xTMT6plex [K9; K10]; 1xTMT6plex [N-Term]	1	2	2	P17182	P17182 [72-81]		1	1715.14	303.1	326.8	295.4	190	191.2	194.2	3	-5.67	48.979
	131.3	130.7	126.1	71.7	72.1	68.1	[R].SFRNPLAK.[-]	1xTMT6plex [K8]; 1xTMT6plex [N-Term]	1	2	2	P17182	P17182 [427-434]		1	1390.86	322.1	334.6	300.4	161.8	164	148.8	3	-1.83	50.6795
	134	129.9	125.5	71.5	68.5	70.6	[K].SCNCLLLK.[V]	2xCarbamidomethyl [C2; C4]; 1xTMT6plex [K8]; 1xTMT6plex [N-Term]	1	2	1	P17182	P17182 [336-343]		0	1465.83	867.4	877.6	788.9	426	411.5	407.4	2	-6.86	52.2475
							[K].VNVVEQEK.[I]	1xTMT6plex [K8]; 1xTMT6plex [N-Term]	1	4	1	P17182	P17182 [82-89]		0	1402.83							3	-2.57	46.1264
							[K].KVNVVEQEKIDK.[L]	3xTMT6plex [K1; K9; K12]; 1xTMT6plex [N-Term]	1	2	1	P17182	P17182 [81-92]		2	2345.46							3	-2.67	46.6128
							[K].EALELLK.[T]	1xTMT6plex [K7]; 1xTMT6plex [N-Term]	1	2	1	P17182	P17182 [222-228]		0	1273.81							2	-2.35	58.4363
126.7	114	118.4	77.6	78.1	85	Q71RI9	Kynurenine--oxoglutarate transaminase 3 OS=Mus musculus OX=10090 GN=Kyat3 PE=1 SV=1	5	2	2	2	455	51.1	8.37	34.6	32.5	31.4	19.5	19.8	20.7
	Abundances (Grouped): F1, 126	Abundances (Grouped): F1, 127	Abundances (Grouped): F1, 128	Abundances (Grouped): F1, 129	Abundances (Grouped): F1, 130	Abundances (Grouped): F1, 131	Annotated Sequence	Modifications	# Protein Groups	# Proteins	# PSMs	Master Protein Accessions	Positions in Master Proteins	Modifications in Master Proteins	# Missed Cleavages	Theo. MH+ [Da]	Abundance: F1: 126, Sample	Abundance: F1: 127, Sample	Abundance: F1: 128, Sample	Abundance: F1: 129, Sample	Abundance: F1: 130, Sample	Abundance: F1: 131, Sample	Charge (by Search Engine): Sequest HT	DeltaM [ppm] (by Search Engine): Sequest HT	RT [min] (by Search Engine): Sequest HT
	126.7	114	118.4	77.6	78.1	85	[K].DSTLDAAEEIFR.[A]	1xTMT6plex [N-Term]	1	1	1	Q71RI9	Q71RI9 [437-448]		0	1595.81	34.6	32.5	31.4	19.5	19.8	20.7	2	2	58.6783
							[R].GFGHPALVK.[A]	1xTMT6plex [K9]; 1xTMT6plex [N-Term]	1	2	1	Q71RI9	Q71RI9 [101-109]		0	1383.85							3	-7.57	45.6622
126.2	122.4	126.2	75.6	76.9	72.7	Q921R2	40S ribosomal protein S13 OS=Mus musculus OX=10090 GN=Rps13 PE=1 SV=1	48	8	17	8	140	16.1	10.71	1435	1453.2	1392.8	790.4	811.1	737.3
	Abundances (Grouped): F1, 126	Abundances (Grouped): F1, 127	Abundances (Grouped): F1, 128	Abundances (Grouped): F1, 129	Abundances (Grouped): F1, 130	Abundances (Grouped): F1, 131	Annotated Sequence	Modifications	# Protein Groups	# Proteins	# PSMs	Master Protein Accessions	Positions in Master Proteins	Modifications in Master Proteins	# Missed Cleavages	Theo. MH+ [Da]	Abundance: F1: 126, Sample	Abundance: F1: 127, Sample	Abundance: F1: 128, Sample	Abundance: F1: 129, Sample	Abundance: F1: 130, Sample	Abundance: F1: 131, Sample	Charge (by Search Engine): Sequest HT	DeltaM [ppm] (by Search Engine): Sequest HT	RT [min] (by Search Engine): Sequest HT
	139.2	123.5	136.7	69.6	70.1	60.9	[K].LTSDDVKEQIYK.[L]	2xTMT6plex [K7; K12]; 1xTMT6plex [N-Term]	1	3	1	Q921R2	Q921R2 [28-39]		1	2126.23	456.5	422.8	435.4	210.1	213.4	178.2	3	0.6	54.083
	114.4	125.7	119.8	76.9	79.8	83.5	[K].GLSQSALPYRR.[S]	1xTMT6plex [N-Term]	1	3	2	Q921R2	Q921R2 [10-20]		1	1476.85	120.5	138.2	122.6	74.5	78	78.4	3	-5.2	42.3182
	120.4	123	126.2	78.7	77.3	74.5	[K].KGLTPSQIGVILR.[D]	1xTMT6plex [K1]; 1xTMT6plex [N-Term]	1	2	3	Q921R2	Q921R2 [43-55]		1	1840.18	170.3	181.6	173.4	102.4	101.5	93.9	3	-0.1	57.2805
	111.3	114.6	112.9	79.6	95.4	86.2	[K].RVLPPNWK.[-Y]	1xTMT6plex [K8]; 1xTMT6plex [N-Term]	1	2	3	Q921R2	Q921R2 [133-140]		1	1467.92	123.3	132.5	121.4	81.1	98	85.1	3	-3.39	50.2682
							[R].DSHGVAQVR.[F]	1xTMT6plex [N-Term]	1	2	5	Q921R2	Q921R2 [56-64]		0	1197.65							3	2.14	25.4224
	143.8	129.3	149.6	57.2	63	57.1	[K].LTSDDVK.[E]	1xTMT6plex [K7]; 1xTMT6plex [N-Term]	1	3	1	Q921R2	Q921R2 [28-34]		0	1235.72	75.2	70.6	76	27.5	30.6	26.6	2	0.43	44.4342
							[R].SVPTWLK.[L]	1xTMT6plex [K7]; 1xTMT6plex [N-Term]	1	3	1	Q921R2	Q921R2 [21-27]		0	1288.8							2	-6.01	57.2116
	122.6	121.8	119.7	80.3	78.2	77.3	[R].LILIESR.[I]	1xTMT6plex [N-Term]	1	2	1	Q921R2	Q921R2 [115-121]		0	1072.69	489.2	507.5	464	294.8	289.6	275.1	2	-4.25	56.6242
126.1	96.6	117.3	95.5	59.7	104.8	P31786	Acyl-CoA-binding protein OS=Mus musculus OX=10090 GN=Dbi PE=1 SV=2	80	7	9	1	87	10	8.82	33.9	27.1	30.6	23.6	14.9	25.1
	Abundances (Grouped): F1, 126	Abundances (Grouped): F1, 127	Abundances (Grouped): F1, 128	Abundances (Grouped): F1, 129	Abundances (Grouped): F1, 130	Abundances (Grouped): F1, 131	Annotated Sequence	Modifications	# Protein Groups	# Proteins	# PSMs	Master Protein Accessions	Positions in Master Proteins	Modifications in Master Proteins	# Missed Cleavages	Theo. MH+ [Da]	Abundance: F1: 126, Sample	Abundance: F1: 127, Sample	Abundance: F1: 128, Sample	Abundance: F1: 129, Sample	Abundance: F1: 130, Sample	Abundance: F1: 131, Sample	Charge (by Search Engine): Sequest HT	DeltaM [ppm] (by Search Engine): Sequest HT	RT [min] (by Search Engine): Sequest HT
	131.1	124.7	129	69.4	70.4	75.4	[K].QATVGDVNTDRPGLLDLKGK.[A]	2xTMT6plex [K18; K20]; 1xTMT6plex [N-Term]	2	3	1	P31786; Q4VWZ5	P31786 [34-53]; Q4VWZ5 [82-101]		1	2784.62	423	420.2	404.4	205.9	210.8	217	4	-3.7	53.9055
	102.2	107.9	98.7	97.8	90.9	102.5	[K].QATVGDVNTDRPGLLDLK.[G]	1xTMT6plex [K18]; 1xTMT6plex [N-Term]	2	3	2	P31786; Q4VWZ5	P31786 [34-51]; Q4VWZ5 [82-99]		0	2370.34	479.1	528.2	449.6	422	395.6	428.4	3	-1.12	56.3981
	95.4	98.4	96.4	101.1	104	104.7	[K].TQPTDEEMLFIYSHFK.[Q]	1xTMT6plex [K16]; 1xTMT6plex [N-Term]	2	3	1	P31786; Q4VWZ5	P31786 [18-33]; Q4VWZ5 [66-81]		0	2444.26	444.1	477.9	435.5	432.7	449.3	434.4	3	-1.59	58.6927
	112.7	106.1	106.3	87.5	96.4	91	[K].TYVEKVDELKK.[K]	3xTMT6plex [K5; K10; K11]; 1xTMT6plex [N-Term]	2	3	1	P31786; Q4VWZ5	P31786 [73-83]; Q4VWZ5 [121-131]		2	2268.4	292.3	287.2	267.8	208.8	232.1	210.3	4	-3.97	53.2718
	109.5	112.8	108.4	89.2	93.5	86.7	[K].TYVEKVDELK.[K]	2xTMT6plex [K5; K10]; 1xTMT6plex [N-Term]	2	3	1	P31786; Q4VWZ5	P31786 [73-82]; Q4VWZ5 [121-130]		1	1911.14	269.7	290.1	259.2	202.1	213.7	190.3	3	-1.2	55.1809
	98	100.3	95.1	102.8	102.3	101.5	[K].AKWDSWNK.[L]	2xTMT6plex [K2; K8]; 1xTMT6plex [N-Term]	2	3	2	P31786; Q4VWZ5	P31786 [54-61]; Q4VWZ5 [102-109]		1	1721.99	274.9	293.8	259.2	265.2	266.3	253.9	3	-4.3	51.9688
	126.1	96.6	117.3	95.5	59.7	104.8	[-].MSQAEFDKAAEEVKR.[L]	2xTMT6plex [K8; K14]; 1xTMT6plex [N-Term]; 1xMet-loss+Acetyl [N-Term]	1	2	1	P31786	P31786 [1-15]	P31786 1xMet-loss+Acetyl [N-Term]	2	2337.3	33.9	27.1	30.6	23.6	14.9	25.1	4	-0.37	52.0945
126.1	107	123.6	73.1	83	87.3	P51432	1-phosphatidylinositol 4,5-bisphosphate phosphodiesterase beta-3 OS=Mus musculus OX=10090 GN=Plcb3 PE=1 SV=2	3	3	4	3	1234	139.4	5.94	79.9	70.8	76.1	42.6	48.8	49.3
	Abundances (Grouped): F1, 126	Abundances (Grouped): F1, 127	Abundances (Grouped): F1, 128	Abundances (Grouped): F1, 129	Abundances (Grouped): F1, 130	Abundances (Grouped): F1, 131	Annotated Sequence	Modifications	# Protein Groups	# Proteins	# PSMs	Master Protein Accessions	Positions in Master Proteins	Modifications in Master Proteins	# Missed Cleavages	Theo. MH+ [Da]	Abundance: F1: 126, Sample	Abundance: F1: 127, Sample	Abundance: F1: 128, Sample	Abundance: F1: 129, Sample	Abundance: F1: 130, Sample	Abundance: F1: 131, Sample	Charge (by Search Engine): Sequest HT	DeltaM [ppm] (by Search Engine): Sequest HT	RT [min] (by Search Engine): Sequest HT
	136	114.2	139	58.4	71.5	80.8	[R].IAAFEEGGK.[F]	1xTMT6plex [K9]; 1xTMT6plex [N-Term]	1	1	2	P51432	P51432 [797-805]		0	1379.79	64.8	56.8	64.3	25.6	31.6	34.3	2	-0.77	54.1912
							[K].EVELTEINRR.[H]	1xTMT6plex [N-Term]	1	2	1	P51432	P51432 [1118-1127]		1	1487.84							3	-0.67	45.5399
	95.9	85.2	77.1	117.3	117.7	106.8	[K].ATNSEDVKEEEEAK.[Q]	2xTMT6plex [K8; K14]; 1xTMT6plex [N-Term]	1	2	1	P51432	P51432 [1016-1029]		1	2266.2	15.1	14	11.8	17	17.2	15	3	0.7	42.1823
126	107	142.5	79.9	76.1	68.5	Q80UK0	SEC14 domain and spectrin repeat-containing protein 1 OS=Mus musculus OX=10090 GN=Sestd1 PE=1 SV=1	3	2	2	2	696	79.3	5.1	13.2	11.7	14.5	7.7	7.4	6.4
	Abundances (Grouped): F1, 126	Abundances (Grouped): F1, 127	Abundances (Grouped): F1, 128	Abundances (Grouped): F1, 129	Abundances (Grouped): F1, 130	Abundances (Grouped): F1, 131	Annotated Sequence	Modifications	# Protein Groups	# Proteins	# PSMs	Master Protein Accessions	Positions in Master Proteins	Modifications in Master Proteins	# Missed Cleavages	Theo. MH+ [Da]	Abundance: F1: 126, Sample	Abundance: F1: 127, Sample	Abundance: F1: 128, Sample	Abundance: F1: 129, Sample	Abundance: F1: 130, Sample	Abundance: F1: 131, Sample	Charge (by Search Engine): Sequest HT	DeltaM [ppm] (by Search Engine): Sequest HT	RT [min] (by Search Engine): Sequest HT
							[R].AQWGIGDSIR.[A]	1xTMT6plex [N-Term]	1	1	1	Q80UK0	Q80UK0 [298-307]		0	1331.73							2	2.81	54.7569
	126	107	142.5	79.9	76.1	68.5	[R].LGDDAQETK.[V]	1xTMT6plex [K9]; 1xTMT6plex [N-Term]	1	1	1	Q80UK0	Q80UK0 [527-535]		0	1434.78	13.2	11.7	14.5	7.7	7.4	6.4	2	0.81	41.6003
126	125.4	124.3	74.2	74.1	76.1	D3Z041	Long-chain-fatty-acid--CoA ligase OS=Mus musculus OX=10090 GN=Acsl1 PE=1 SV=1	23	16	17	15	699	78	7.47	1735.5	1803.6	1662.6	940.1	947.1	934.5
	Abundances (Grouped): F1, 126	Abundances (Grouped): F1, 127	Abundances (Grouped): F1, 128	Abundances (Grouped): F1, 129	Abundances (Grouped): F1, 130	Abundances (Grouped): F1, 131	Annotated Sequence	Modifications	# Protein Groups	# Proteins	# PSMs	Master Protein Accessions	Positions in Master Proteins	Modifications in Master Proteins	# Missed Cleavages	Theo. MH+ [Da]	Abundance: F1: 126, Sample	Abundance: F1: 127, Sample	Abundance: F1: 128, Sample	Abundance: F1: 129, Sample	Abundance: F1: 130, Sample	Abundance: F1: 131, Sample	Charge (by Search Engine): Sequest HT	DeltaM [ppm] (by Search Engine): Sequest HT	RT [min] (by Search Engine): Sequest HT
	110.5	111.1	103.3	91.3	97.7	86.1	[K].EVAELAECIGSGLIQK.[G]	1xCarbamidomethyl [C8]; 1xTMT6plex [K16]; 1xTMT6plex [N-Term]	1	2	1	D3Z041	D3Z041 [126-141]		0	2175.21	50.8	53.3	46.1	38.6	41.7	35.3	3	5.52	59.0385
	120.2	127.9	112	89.6	68.4	82	[K].RGLQGSFEELCR.[N]	1xCarbamidomethyl [C11]; 1xTMT6plex [N-Term]	1	2	1	D3Z041	D3Z041 [616-627]		1	1680.87	38.8	43.1	35.1	26.6	20.5	23.6	3	-0.91	50.6168
	109.9	106.8	95.9	97	92.8	97.6	[R].GIQVSNNGPCLGSR.[K]	1xCarbamidomethyl [C10]; 1xTMT6plex [N-Term]	1	3	2	D3Z041	D3Z041 [100-113]		0	1687.87	49.8	50.5	42.2	40.4	39	39.4	3	-0.62	46.9554
							[R].GLQGSFEELCR.[N]	1xCarbamidomethyl [C10]; 1xTMT6plex [N-Term]	1	2	1	D3Z041	D3Z041 [617-627]		0	1524.77							2	-1.21	55.8774
	113.6	113.8	109.9	90.6	82.8	89.3	[K].ALKPPCDLSMQSVEIAGTTDGIRR.[S]	1xCarbamidomethyl [C6]; 1xTMT6plex [K3]; 1xTMT6plex [N-Term]	1	4	1	D3Z041	D3Z041 [50-73]		1	3073.65	128.3	134.1	120.5	94.1	86.8	89.9	4	-4.06	56.5561
	138.1	129.6	132.1	71.5	63.4	65.3	[R].IFGQANTSLKR.[W]	1xTMT6plex [K10]; 1xTMT6plex [N-Term]	1	2	1	D3Z041	D3Z041 [378-388]		1	1693.02	186.8	183	173.6	89	79.6	78.7	3	-1.96	50.266
	109.8	117.8	109.4	83.5	91.7	87.9	[K].LAQGEYIAPEK.[I]	1xTMT6plex [K11]; 1xTMT6plex [N-Term]	2	4	1	Q8JZR0; D3Z041	Q8JZR0 [547-557]; D3Z041 [563-573]		0	1676.96	40.9	45.8	39.6	28.6	31.7	29.2	2	-0.24	52.1668
	119.9	119.6	123.2	83.9	78.4	75	[R].SAVLEDDK.[L]	1xTMT6plex [K8]; 1xTMT6plex [N-Term]	1	4	1	D3Z041	D3Z041 [74-81]		0	1334.76	40.7	42.4	40.6	26.2	24.7	22.7	2	-0.02	45.0047
	109.6	114.5	111.8	97.4	83.5	83.1	[K].DGWLHTGDIGK.[W]	1xTMT6plex [K11]; 1xTMT6plex [N-Term]	1	2	1	D3Z041	D3Z041 [534-544]		0	1656.91	61.1	66.6	60.5	49.9	43.2	41.3	3	-2.1	53.8062
	132.3	138.4	136.5	60.4	68.4	63.9	[R].TAEALDKDGWLHTGDIGK.[W]	2xTMT6plex [K7; K18]; 1xTMT6plex [N-Term]	1	2	1	D3Z041	D3Z041 [527-544]		1	2614.44	155.8	170.1	156	65.4	74.7	67.1	4	-3.54	56.3861
							[K].CGVEIISLK.[A]	1xCarbamidomethyl [C1]; 1xTMT6plex [K9]; 1xTMT6plex [N-Term]	1	2	1	D3Z041	D3Z041 [242-250]		0	1476.89							2	-4.33	58.1344
	122.5	125.4	129.4	76.8	68.9	76.9	[K].GEGEVCVK.[G]	1xCarbamidomethyl [C6]; 1xTMT6plex [K8]; 1xTMT6plex [N-Term]	1	2	1	D3Z041	D3Z041 [505-512]		0	1335.73	186.9	199.7	191.7	107.7	97.5	104.6	2	-0.17	41.3151
	134.6	134.8	136.4	59.5	70.1	64.6	[K].ALEDLGR.[V]	1xTMT6plex [N-Term]	1	2	1	D3Z041	D3Z041 [251-257]		0	1002.58	186.2	194.7	183.2	75.7	90	79.7	2	-0.63	47.3602
	129.5	126.3	125.5	68.8	72.8	77	[K].AILDDLLK.[L]	1xTMT6plex [K8]; 1xTMT6plex [N-Term]	1	2	1	D3Z041	D3Z041 [634-641]		0	1358.87	609.4	620.3	573.5	297.9	317.7	323	2	1.17	58.9434
							[-].MEVHELFR.[Y]	1xOxidation [M1]; 1xTMT6plex [N-Term]	1	4	1	D3Z041	D3Z041 [1-8]		0	1305.68							3	-1.83	45.3777
							[R].NNSLWDK.[L]	1xTMT6plex [K7]; 1xTMT6plex [N-Term]	1	2	1	D3Z041	D3Z041 [409-415]		0	1334.75							2	0.69	51.0654
126	106.7	120.7	86.9	76	83.7	P35505	Fumarylacetoacetase OS=Mus musculus OX=10090 GN=Fah PE=1 SV=2	2	1	1	1	419	46.1	7.18	21.6	19.1	20.1	13.7	12.1	12.8
	Abundances (Grouped): F1, 126	Abundances (Grouped): F1, 127	Abundances (Grouped): F1, 128	Abundances (Grouped): F1, 129	Abundances (Grouped): F1, 130	Abundances (Grouped): F1, 131	Annotated Sequence	Modifications	# Protein Groups	# Proteins	# PSMs	Master Protein Accessions	Positions in Master Proteins	Modifications in Master Proteins	# Missed Cleavages	Theo. MH+ [Da]	Abundance: F1: 126, Sample	Abundance: F1: 127, Sample	Abundance: F1: 128, Sample	Abundance: F1: 129, Sample	Abundance: F1: 130, Sample	Abundance: F1: 131, Sample	Charge (by Search Engine): Sequest HT	DeltaM [ppm] (by Search Engine): Sequest HT	RT [min] (by Search Engine): Sequest HT
	126	106.7	120.7	86.9	76	83.7	[K].AIDVEQGQTR.[T]	1xTMT6plex [N-Term]	1	1	1	P35505	P35505 [372-381]		0	1345.73	21.6	19.1	20.1	13.7	12.1	12.8	2	-0.07	39.4031
125.8	126.7	102.9	77.1	91.1	76.4	Q9D3P8	Plasminogen receptor (KT) OS=Mus musculus OX=10090 GN=Plgrkt PE=1 SV=1	22	3	3	3	147	17.3	9.5	27.7	29.1	22	15.6	18.6	15
	Abundances (Grouped): F1, 126	Abundances (Grouped): F1, 127	Abundances (Grouped): F1, 128	Abundances (Grouped): F1, 129	Abundances (Grouped): F1, 130	Abundances (Grouped): F1, 131	Annotated Sequence	Modifications	# Protein Groups	# Proteins	# PSMs	Master Protein Accessions	Positions in Master Proteins	Modifications in Master Proteins	# Missed Cleavages	Theo. MH+ [Da]	Abundance: F1: 126, Sample	Abundance: F1: 127, Sample	Abundance: F1: 128, Sample	Abundance: F1: 129, Sample	Abundance: F1: 130, Sample	Abundance: F1: 131, Sample	Charge (by Search Engine): Sequest HT	DeltaM [ppm] (by Search Engine): Sequest HT	RT [min] (by Search Engine): Sequest HT
	125.8	126.7	102.9	77.1	91.1	76.4	[K].NQQEFMVTHAR.[L]	1xTMT6plex [N-Term]	1	4	1	Q9D3P8	Q9D3P8 [15-25]		0	1589.81	27.7	29.1	22	15.6	18.6	15	3	-5.48	40.8535
							[R].HLTMQNEMR.[E]	1xTMT6plex [N-Term]	1	3	1	Q9D3P8	Q9D3P8 [31-39]		0	1388.7							3	-0.87	39.8869
							[R].MKSEAEDILETEK.[T]	2xTMT6plex [K2; K13]; 1xTMT6plex [N-Term]	1	1	1	Q9D3P8	Q9D3P8 [106-118]		1	2210.22							3	-2.11	57.6497
125.6	124.5	128.1	67.8	69.5	84.4	O88351	Inhibitor of nuclear factor kappa-B kinase subunit beta OS=Mus musculus OX=10090 GN=Ikbkb PE=1 SV=1	6	3	3	3	757	86.6	6.4	81.2	84	80.4	40.3	41.7	48.6
	Abundances (Grouped): F1, 126	Abundances (Grouped): F1, 127	Abundances (Grouped): F1, 128	Abundances (Grouped): F1, 129	Abundances (Grouped): F1, 130	Abundances (Grouped): F1, 131	Annotated Sequence	Modifications	# Protein Groups	# Proteins	# PSMs	Master Protein Accessions	Positions in Master Proteins	Modifications in Master Proteins	# Missed Cleavages	Theo. MH+ [Da]	Abundance: F1: 126, Sample	Abundance: F1: 127, Sample	Abundance: F1: 128, Sample	Abundance: F1: 129, Sample	Abundance: F1: 130, Sample	Abundance: F1: 131, Sample	Charge (by Search Engine): Sequest HT	DeltaM [ppm] (by Search Engine): Sequest HT	RT [min] (by Search Engine): Sequest HT
							[R].KQGGTLDDLEEQAR.[E]	1xTMT6plex [K1]; 1xTMT6plex [N-Term]	1	3	1	O88351	O88351 [555-568]		1	2018.09							3	-2.97	47.7236
	102.4	105.7	95.9	93.4	86.2	116.4	[K].VRGPVSGSPDSMNVSR.[L]	1xTMT6plex [N-Term]	1	3	1	O88351	O88351 [665-680]		1	1873.98	15.5	16.7	14.1	13	12.1	15.7	3	-1.07	41.2133
	132.7	130.3	138	60	64.5	74.6	[R].YLNQFENCCGLR.[E]	2xCarbamidomethyl [C8; C9]; 1xTMT6plex [N-Term]	1	5	1	O88351	O88351 [107-118]		0	1802.85	65.7	67.3	66.3	27.3	29.6	32.9	2	-5.33	56.5916
125.5	125.5	124.7	73.7	77.3	73.3	O55142	60S ribosomal protein L35a OS=Mus musculus OX=10090 GN=Rpl35a PE=1 SV=2	69	11	13	11	110	12.5	10.89	1719.8	1795.4	1658.6	928.2	983.3	895.3
	Abundances (Grouped): F1, 126	Abundances (Grouped): F1, 127	Abundances (Grouped): F1, 128	Abundances (Grouped): F1, 129	Abundances (Grouped): F1, 130	Abundances (Grouped): F1, 131	Annotated Sequence	Modifications	# Protein Groups	# Proteins	# PSMs	Master Protein Accessions	Positions in Master Proteins	Modifications in Master Proteins	# Missed Cleavages	Theo. MH+ [Da]	Abundance: F1: 126, Sample	Abundance: F1: 127, Sample	Abundance: F1: 128, Sample	Abundance: F1: 129, Sample	Abundance: F1: 130, Sample	Abundance: F1: 131, Sample	Charge (by Search Engine): Sequest HT	DeltaM [ppm] (by Search Engine): Sequest HT	RT [min] (by Search Engine): Sequest HT
	134.5	136.7	133.5	65.2	67.1	63	[K].IEGVYARDETEFYLGKR.[C]	1xTMT6plex [K16]; 1xTMT6plex [N-Term]	1	1	1	O55142	O55142 [30-46]		2	2504.35	306.5	325.3	295.4	136.7	141.9	128	4	-0.03	57.0436
	122.5	113.5	120.9	81.6	82.9	78.6	[R].DETEFYLGK.[R]	1xTMT6plex [K9]; 1xTMT6plex [N-Term]	1	1	1	O55142	O55142 [37-45]		0	1559.84	276.6	267.5	265	169.5	173.7	158.1	2	-3.2	57.1684
	149.9	137.3	128.6	58.8	66.3	59.1	[K].NNTVTPGGKPNK.[T]	2xTMT6plex [K9; K12]; 1xTMT6plex [N-Term]	1	1	1	O55142	O55142 [55-66]		0	1914.14	164.5	157.2	137	59.3	67.5	57.8	3	-4.7	36.5691
	113.8	115.9	120	80.7	89.3	80.4	[K].RCAYVYK.[A]	1xCarbamidomethyl [C2]; 1xTMT6plex [K7]; 1xTMT6plex [N-Term]	1	1	1	O55142	O55142 [46-52]		1	1417.8	277.8	295.3	284.4	181.1	202.2	175	3	-4.62	39.294
							[K].NNTVTPGGKPNKTR.[V]	2xTMT6plex [K9; K12]; 1xTMT6plex [N-Term]	1	1	1	O55142	O55142 [55-68]		1	2171.29							4	-5.8	33.6983
	126.8	143.9	123	73.1	65.3	67.9	[R].EHTALLK.[I]	1xTMT6plex [K7]; 1xTMT6plex [N-Term]	1	1	2	O55142	O55142 [23-29]		0	1269.79	76	90	71.6	40.3	36.3	36.3	3	-2.54	40.4478
	121.7	131.9	132.4	68	72.7	73.2	[K].FRSNLPAK.[A]	1xTMT6plex [K8]; 1xTMT6plex [N-Term]	1	1	1	O55142	O55142 [88-95]		1	1390.86	355.8	402.4	375.8	182.8	197.1	190.8	3	-3.42	43.1583
	113	112.3	108.4	81.4	79.3	105.6	[R].VMLYPSRI.[-]	1xTMT6plex [N-Term]	1	1	2	O55142	O55142 [103-110]		1	1207.71	26.4	27.4	24.6	17.5	17.2	22	2	-0.85	57.7612
	131.7	127.1	120.9	74.8	77.5	68	[K].IEGVYAR.[D]	1xTMT6plex [N-Term]	1	1	1	O55142	O55142 [30-36]		0	1036.6	154.5	155.7	137.7	80.7	84.4	71.1	2	-0.72	45.2366
	117.1	102.4	99	93.9	97.3	90.3	[K].AIFAGYK.[R]	1xTMT6plex [K7]; 1xTMT6plex [N-Term]	1	1	1	O55142	O55142 [9-15]		0	1227.75	81.7	74.6	67.1	60.3	63	56.2	2	-0.01	56.0625
							[R].AHGNSGMVR.[A]	1xOxidation [M7]; 1xTMT6plex [N-Term]	1	1	1	O55142	O55142 [77-85]		0	1173.6							3	-1.49	15.8258
125.4	110.1	94.2	88	81.2	101.2	O55176	E3 ubiquitin-protein ligase Praja-1 OS=Mus musculus OX=10090 GN=Pja1 PE=1 SV=3	7	3	3	3	578	63.9	4.97	20.3	18.6	14.8	13.1	12.2	14.6
[truncated: 72,507 more rows]

## Sheet: proteins
Accession	Description	Gene name	Coverage [%]	# Peptides	# PSMs	# Unique Peptides	# AAs	MW [kDa]	calc. pI	Accession	SID	WT_ES_1	WT_ES_2	WT_ES_3	MEX3d_hom_ES_1	MEX3d_hom_ES_2	MEX3d_hom_ES_3	>Normalize	SID	WT_ES_1 (normalized)	WT_ES_2 (normalized)	WT_ES_3 (normalized)	MEX3d_hom_ES_1 (normalized)	MEX3d_hom_ES_2 (normalized)	MEX3d_hom_ES_3 (normalized)	>Stat	SID	WT (average)	MEX3d (average)	WT (count)	MEX3d (count)	Fold change	T-value (two-sided T-test )	P value	P Significance	SID	FDR	FDR Significance	>Selection	SIG(FC1.5;FDR0.05)
[truncated: 7,405 more rows]

[truncated: 3 more sheets: FDR<0.05, FC>1.5, UP, peptideGroups]
