# Supplementary material for: Targeted mRNP-phagy licenses translational activation during cellular metamorphosis
Source: Research Square preprint supplement (doi:10.21203/rs.3.rs-6289188/v1), 2025-05-06
Supplement: Supplementary file 10 [file b60c44c895377737a0064aa6.xlsx]

## Sheet: deltaTE
ensembl_gene_id	baseMean	log2FoldChange	lfcSE	stat	pvalue	padj	external_gene_name	description
ENSMUSG00000000001	45.0775	-1.56407	0.560864	-2.78868	0.00529238	0.0489144	Gnai3	G protein subunit alpha i3 [Source:MGI Symbol;Acc:MGI:95773]
ENSMUSG00000000003	0	NA	NA	NA	NA	NA	Pbsn	probasin [Source:MGI Symbol;Acc:MGI:1860484]
ENSMUSG00000000028	22.4846	-1.26186	1.84319	-0.684606	0.493593	0.811806	Cdc45	cell division cycle 45 [Source:MGI Symbol;Acc:MGI:1338073]
ENSMUSG00000000037	37.9087	-4.25384	1.91315	-2.22347	0.0261838	0.16055	Scml2	Scm polycomb group protein like 2 [Source:MGI Symbol;Acc:MGI:1340042]
ENSMUSG00000000049	50.5476	0.376168	0.677986	0.554832	0.57901	0.856502	Apoh	apolipoprotein H [Source:MGI Symbol;Acc:MGI:88058]
ENSMUSG00000000056	13.5337	-4.48683	1.54284	-2.90816	0.00363562	0.0360323	Narf	nuclear prelamin A recognition factor [Source:MGI Symbol;Acc:MGI:1914858]
ENSMUSG00000000058	0.353653	1.10588	6.15499	0.179672	0.85741	NA	Cav2	caveolin 2 [Source:MGI Symbol;Acc:MGI:107571]
ENSMUSG00000000078	3.3792	-0.923232	2.75502	-0.335109	0.737543	NA	Klf6	Kruppel-like transcription factor 6 [Source:MGI Symbol;Acc:MGI:1346318]
ENSMUSG00000000085	19.7614	1.8145	1.85077	0.980404	0.326887	0.683786	Scmh1	sex comb on midleg homolog 1 [Source:MGI Symbol;Acc:MGI:1352762]
ENSMUSG00000000088	54.7961	-1.02418	1.73858	-0.589091	0.5558	0.845334	Cox5a	cytochrome c oxidase subunit 5A [Source:MGI Symbol;Acc:MGI:88474]
ENSMUSG00000000093	5.79772	2.51379	2.28685	1.09924	0.271665	0.628325	Tbx2	T-box 2 [Source:MGI Symbol;Acc:MGI:98494]
ENSMUSG00000000094	0	NA	NA	NA	NA	NA	Tbx4	T-box 4 [Source:MGI Symbol;Acc:MGI:102556]
ENSMUSG00000000103	8.53093	-2.72898	1.93217	-1.41239	0.157836	0.485198	Zfy2	zinc finger protein 2, Y-linked [Source:MGI Symbol;Acc:MGI:99213]
ENSMUSG00000000120	41.2598	-2.2893	1.093	-2.0945	0.0362153	0.199776	Ngfr	nerve growth factor receptor (TNFR superfamily, member 16) [Source:MGI Symbol;Acc:MGI:97323]
ENSMUSG00000000125	179.196	1.8014	0.550691	3.27116	0.00107107	0.0136299	Wnt3	wingless-type MMTV integration site family, member 3 [Source:MGI Symbol;Acc:MGI:98955]
ENSMUSG00000000126	0	NA	NA	NA	NA	NA	Wnt9a	wingless-type MMTV integration site family, member 9A [Source:MGI Symbol;Acc:MGI:2446084]
ENSMUSG00000000127	43.9105	0.954802	1.77186	0.538869	0.589978	0.860858	Fer	FER tyrosine kinase [Source:MGI Symbol;Acc:MGI:105917]
ENSMUSG00000000131	92.1089	1.77061	1.70074	1.04108	0.297838	0.655905	Xpo6	exportin 6 [Source:MGI Symbol;Acc:MGI:2429950]
ENSMUSG00000000134	2.79717	0.489386	2.68427	0.182316	0.855335	NA	Tfe3	transcription factor E3 [Source:MGI Symbol;Acc:MGI:98511]
ENSMUSG00000000142	1.06585	0.568037	4.64184	0.122373	0.902603	NA	Axin2	axin 2 [Source:MGI Symbol;Acc:MGI:1270862]
ENSMUSG00000000148	10.8215	-0.646079	1.86725	-0.346005	0.729339	0.917496	Brat1	BRCA1-associated ATM activator 1 [Source:MGI Symbol;Acc:MGI:1891679]
ENSMUSG00000000149	39.5811	4.61467	0.975094	4.73254	2.22e-06	5.76e-05	Gna12	guanine nucleotide binding protein, alpha 12 [Source:MGI Symbol;Acc:MGI:95767]
ENSMUSG00000000154	3.80814	1.77555	2.30831	0.769197	0.441776	NA	Slc22a18	solute carrier family 22 (organic cation transporter), member 18 [Source:MGI Symbol;Acc:MGI:1336884]
ENSMUSG00000000157	0	NA	NA	NA	NA	NA	Itgb2l	integrin beta 2-like [Source:MGI Symbol;Acc:MGI:1277979]
ENSMUSG00000000159	0.727021	5.58158	6.15284	0.907155	0.364325	NA	Igsf5	immunoglobulin superfamily, member 5 [Source:MGI Symbol;Acc:MGI:1919308]
ENSMUSG00000000167	19.5642	-0.971944	1.81603	-0.535202	0.59251	0.861874	Pih1d2	PIH1 domain containing 2 [Source:MGI Symbol;Acc:MGI:1919864]
ENSMUSG00000000168	146.208	-1.2683	0.265381	-4.77915	1.76e-06	4.72e-05	Dlat	dihydrolipoamide S-acetyltransferase [Source:MGI Symbol;Acc:MGI:2385311]
ENSMUSG00000000171	31.6225	-0.958456	0.710595	-1.34881	0.177399	0.515274	Sdhd	succinate dehydrogenase complex, subunit D, integral membrane protein [Source:MGI Symbol;Acc:MGI:1914175]
ENSMUSG00000000182	0	NA	NA	NA	NA	NA	Fgf23	fibroblast growth factor 23 [Source:MGI Symbol;Acc:MGI:1891427]
ENSMUSG00000000183	0	NA	NA	NA	NA	NA	Fgf6	fibroblast growth factor 6 [Source:MGI Symbol;Acc:MGI:95520]
ENSMUSG00000000184	3.49659	-0.127264	2.6337	-0.0483214	0.96146	NA	Ccnd2	cyclin D2 [Source:MGI Symbol;Acc:MGI:88314]
ENSMUSG00000000194	38.9245	-0.368391	0.822151	-0.448081	0.654094	0.885556	Gpr107	G protein-coupled receptor 107 [Source:MGI Symbol;Acc:MGI:2139054]
ENSMUSG00000000197	1.72877	4.55265	3.35993	1.35499	0.175422	NA	Nalcn	sodium leak channel, non-selective [Source:MGI Symbol;Acc:MGI:2444306]
ENSMUSG00000000202	0	NA	NA	NA	NA	NA	Btbd17	BTB domain containing 17 [Source:MGI Symbol;Acc:MGI:1919264]
ENSMUSG00000000204	0	NA	NA	NA	NA	NA	Slfn4	schlafen 4 [Source:MGI Symbol;Acc:MGI:1329010]
ENSMUSG00000000214	1.82057	2.51122	3.94002	0.637362	0.523889	NA	Th	tyrosine hydroxylase [Source:MGI Symbol;Acc:MGI:98735]
ENSMUSG00000000215	0	NA	NA	NA	NA	NA	Ins2	insulin II [Source:MGI Symbol;Acc:MGI:96573]
ENSMUSG00000000216	0	NA	NA	NA	NA	NA	Scnn1g	sodium channel, nonvoltage-gated 1 gamma [Source:MGI Symbol;Acc:MGI:104695]
ENSMUSG00000000223	1.35339	2.98065	6.1006	0.488583	0.625137	NA	Drp2	dystrophin related protein 2 [Source:MGI Symbol;Acc:MGI:107432]
ENSMUSG00000000244	0	NA	NA	NA	NA	NA	Tspan32	tetraspanin 32 [Source:MGI Symbol;Acc:MGI:1350360]
ENSMUSG00000000247	2.20233	8.10748	4.25508	1.90536	0.0567328	NA	Lhx2	LIM homeobox protein 2 [Source:MGI Symbol;Acc:MGI:96785]
ENSMUSG00000000248	0	NA	NA	NA	NA	NA	Clec2g	C-type lectin domain family 2, member g [Source:MGI Symbol;Acc:MGI:1918059]
ENSMUSG00000000253	1.95938	-1.77474	3.78028	-0.469472	0.638732	NA	Gmpr	guanosine monophosphate reductase [Source:MGI Symbol;Acc:MGI:1913605]
ENSMUSG00000000263	0	NA	NA	NA	NA	NA	Glra1	glycine receptor, alpha 1 subunit [Source:MGI Symbol;Acc:MGI:95747]
ENSMUSG00000000266	0.0219423	1.25104	6.23278	0.200719	0.840918	NA	Mid2	midline 2 [Source:MGI Symbol;Acc:MGI:1344333]
ENSMUSG00000000275	1.84232	-4.11925	4.67741	-0.880668	0.378497	NA	Trim25	tripartite motif-containing 25 [Source:MGI Symbol;Acc:MGI:102749]
ENSMUSG00000000276	1.57988	-0.0366606	2.99941	-0.0122226	0.990248	NA	Dgke	diacylglycerol kinase, epsilon [Source:MGI Symbol;Acc:MGI:1889276]
ENSMUSG00000000278	25.7625	-0.509472	0.900444	-0.5658	0.571529	0.853009	Scpep1	serine carboxypeptidase 1 [Source:MGI Symbol;Acc:MGI:1921867]
ENSMUSG00000000282	69.6483	0.653661	0.380652	1.71722	0.0859399	0.346433	Mnt	max binding protein [Source:MGI Symbol;Acc:MGI:109150]
ENSMUSG00000000290	0.674661	-3.16119	6.12814	-0.515848	0.60596	NA	Itgb2	integrin beta 2 [Source:MGI Symbol;Acc:MGI:96611]
ENSMUSG00000000295	2.18333	-0.63626	3.58243	-0.177606	0.859033	NA	Hddc2	HD domain containing 2 [Source:MGI Symbol;Acc:MGI:1916942]
ENSMUSG00000000296	2.58687	1.93822	4.06659	0.47662	0.633633	NA	Tpd52l1	tumor protein D52-like 1 [Source:MGI Symbol;Acc:MGI:1298386]
ENSMUSG00000000301	3.27804	2.56969	2.53128	1.01517	0.310024	NA	Pemt	phosphatidylethanolamine N-methyltransferase [Source:MGI Symbol;Acc:MGI:104535]
ENSMUSG00000000303	0.0200922	1.26683	6.23134	0.203299	0.838901	NA	Cdh1	cadherin 1 [Source:MGI Symbol;Acc:MGI:88354]
ENSMUSG00000000305	0.98857	1.40823	5.76989	0.244066	0.80718	NA	Cdh4	cadherin 4 [Source:MGI Symbol;Acc:MGI:99218]
ENSMUSG00000000308	0	NA	NA	NA	NA	NA	Ckmt1	creatine kinase, mitochondrial 1, ubiquitous [Source:MGI Symbol;Acc:MGI:99441]
ENSMUSG00000000317	5.70948	3.16674	2.4712	1.28146	0.200033	0.543325	Bcl6b	B cell CLL/lymphoma 6, member B [Source:MGI Symbol;Acc:MGI:1278332]
ENSMUSG00000000318	0.877918	-1.1455	5.89777	-0.194225	0.845999	NA	Clec10a	C-type lectin domain family 10, member A [Source:MGI Symbol;Acc:MGI:96975]
ENSMUSG00000000320	25.7443	2.49547	1.08171	2.30697	0.0210567	0.137612	Alox12	arachidonate 12-lipoxygenase [Source:MGI Symbol;Acc:MGI:87998]
ENSMUSG00000000326	2.1134	0.371439	2.69481	0.137835	0.890371	NA	Comt	catechol-O-methyltransferase [Source:MGI Symbol;Acc:MGI:88470]
ENSMUSG00000000339	34.1564	2.42205	0.8252	2.93511	0.00333433	0.0338626	Rtca	RNA 3'-terminal phosphate cyclase [Source:MGI Symbol;Acc:MGI:1913618]
ENSMUSG00000000340	6.555	-1.04426	1.28537	-0.812422	0.416549	0.76003	Dbt	dihydrolipoamide branched chain transacylase E2 [Source:MGI Symbol;Acc:MGI:105386]
ENSMUSG00000000346	48.0977	-0.333487	0.603612	-0.552486	0.580615	0.857366	Dazap2	DAZ associated protein 2 [Source:MGI Symbol;Acc:MGI:1344344]
ENSMUSG00000000355	0.995538	6.77749	6.09111	1.11268	0.265844	NA	Mcts1	malignant T cell amplified sequence 1 [Source:MGI Symbol;Acc:MGI:1916245]
ENSMUSG00000000359	0.671472	4.87756	6.16965	0.790573	0.429193	NA	Rem1	rad and gem related GTP binding protein 1 [Source:MGI Symbol;Acc:MGI:1097696]
ENSMUSG00000000365	180.573	-1.59189	0.445477	-3.57345	0.000352307	0.0052958	Rnf17	ring finger protein 17 [Source:MGI Symbol;Acc:MGI:1353419]
ENSMUSG00000000374	26.3692	1.08234	0.695212	1.55686	0.119505	0.418587	Trappc10	trafficking protein particle complex 10 [Source:MGI Symbol;Acc:MGI:1336209]
ENSMUSG00000000378	1.3434	1.64769	5.82383	0.282922	0.777237	NA	Ccm2	cerebral cavernous malformation 2 [Source:MGI Symbol;Acc:MGI:2384924]
ENSMUSG00000000381	1.63004	4.62331	4.98902	0.926697	0.354084	NA	Wap	whey acidic protein [Source:MGI Symbol;Acc:MGI:98943]
ENSMUSG00000000384	18.5288	0.912367	1.81583	0.502451	0.61535	0.870979	Tbrg4	transforming growth factor beta regulated gene 4 [Source:MGI Symbol;Acc:MGI:1100868]
ENSMUSG00000000385	0.583573	1.11911	6.19347	0.180692	0.856609	NA	Tmprss2	transmembrane protease, serine 2 [Source:MGI Symbol;Acc:MGI:1354381]
ENSMUSG00000000386	0.282031	2.95876	6.19285	0.47777	0.632814	NA	Mx1	MX dynamin-like GTPase 1 [Source:MGI Symbol;Acc:MGI:97243]
ENSMUSG00000000392	0	NA	NA	NA	NA	NA	Fap	fibroblast activation protein [Source:MGI Symbol;Acc:MGI:109608]
ENSMUSG00000000394	0	NA	NA	NA	NA	NA	Gcg	glucagon [Source:MGI Symbol;Acc:MGI:95674]
ENSMUSG00000000399	87.2886	-1.47205	1.70374	-0.864014	0.38758	0.734531	Ndufa9	NADH:ubiquinone oxidoreductase subunit A9 [Source:MGI Symbol;Acc:MGI:1913358]
ENSMUSG00000000402	0	NA	NA	NA	NA	NA	Egfl6	EGF-like-domain, multiple 6 [Source:MGI Symbol;Acc:MGI:1858599]
ENSMUSG00000000409	0	NA	NA	NA	NA	NA	Lck	lymphocyte protein tyrosine kinase [Source:MGI Symbol;Acc:MGI:96756]
ENSMUSG00000000411	752.247	1.83818	0.190509	9.64878	4.97e-22	6.62e-20	Tssk3	testis-specific serine kinase 3 [Source:MGI Symbol;Acc:MGI:1929914]
ENSMUSG00000000416	0.39564	0.895907	6.13951	0.145925	0.883981	NA	Cttnbp2	cortactin binding protein 2 [Source:MGI Symbol;Acc:MGI:1353467]
ENSMUSG00000000420	1.44734	0.58306	4.46522	0.130578	0.896109	NA	Galnt1	polypeptide N-acetylgalactosaminyltransferase 1 [Source:MGI Symbol;Acc:MGI:894693]
ENSMUSG00000000435	0	NA	NA	NA	NA	NA	Myf5	myogenic factor 5 [Source:MGI Symbol;Acc:MGI:97252]
ENSMUSG00000000439	205.405	3.99722	0.763933	5.23243	1.67e-07	5.24e-06	Mkrn2	makorin, ring finger protein, 2 [Source:MGI Symbol;Acc:MGI:1914277]
ENSMUSG00000000440	0.0977509	3.17454	6.23278	0.50933	0.610521	NA	Pparg	peroxisome proliferator activated receptor gamma [Source:MGI Symbol;Acc:MGI:97747]
ENSMUSG00000000441	9.71143	-0.5204	2.02121	-0.257469	0.796817	0.938067	Raf1	v-raf-leukemia viral oncogene 1 [Source:MGI Symbol;Acc:MGI:97847]
ENSMUSG00000000486	0	NA	NA	NA	NA	NA	Septin1	septin 1 [Source:MGI Symbol;Acc:MGI:1858916]
ENSMUSG00000000489	3.2633	4.57436	3.01446	1.51747	0.129148	NA	Pdgfb	platelet derived growth factor, B polypeptide [Source:MGI Symbol;Acc:MGI:97528]
ENSMUSG00000000530	0	NA	NA	NA	NA	NA	Acvrl1	activin A receptor, type II-like 1 [Source:MGI Symbol;Acc:MGI:1338946]
ENSMUSG00000000531	2.32792	-2.10216	3.15242	-0.66684	0.504875	NA	Tamalin	trafficking regulator and scaffold protein tamalin [Source:MGI Symbol;Acc:MGI:1860303]
ENSMUSG00000000532	17.7189	-2.75015	1.28719	-2.13656	0.032634	0.185765	Acvr1b	activin A receptor, type 1B [Source:MGI Symbol;Acc:MGI:1338944]
ENSMUSG00000000538	2.26582	0.130745	2.89698	0.0451314	0.964003	NA	Tom1l2	target of myb1-like 2 (chicken) [Source:MGI Symbol;Acc:MGI:2443306]
ENSMUSG00000000544	0.0977509	3.17454	6.23278	0.50933	0.610521	NA	Gpa33	glycoprotein A33 transmembrane [Source:MGI Symbol;Acc:MGI:1891703]
ENSMUSG00000000552	44.0797	0.918432	1.78525	0.514455	0.606934	0.868474	Zfp385a	zinc finger protein 385A [Source:MGI Symbol;Acc:MGI:1352495]
ENSMUSG00000000555	0.171145	-0.636317	6.17001	-0.103131	0.917859	NA	Itga5	integrin alpha 5 (fibronectin receptor alpha) [Source:MGI Symbol;Acc:MGI:96604]
ENSMUSG00000000560	0	NA	NA	NA	NA	NA	Gabra2	gamma-aminobutyric acid type A receptor subunit alpha 2 [Source:MGI Symbol;Acc:MGI:95614]
ENSMUSG00000000561	9.95204	-4.18393	1.4693	-2.84757	0.00440548	0.0422025	Wdr77	WD repeat domain 77 [Source:MGI Symbol;Acc:MGI:1917715]
ENSMUSG00000000562	2.9334	4.25828	3.29168	1.29365	0.195787	NA	Adora3	adenosine A3 receptor [Source:MGI Symbol;Acc:MGI:104847]
ENSMUSG00000000563	183.335	-0.975502	0.371326	-2.62707	0.00861225	0.0715544	Atp5pb	ATP synthase peripheral stalk-membrane subunit b [Source:MGI Symbol;Acc:MGI:1100495]
ENSMUSG00000000567	6.80244	7.78243	1.74133	4.46923	7.85e-06	0.000180153	Sox9	SRY (sex determining region Y)-box 9 [Source:MGI Symbol;Acc:MGI:98371]
ENSMUSG00000000568	53.4977	-0.938181	1.74253	-0.5384	0.590301	0.860858	Hnrnpd	heterogeneous nuclear ribonucleoprotein D [Source:MGI Symbol;Acc:MGI:101947]
ENSMUSG00000000579	0	NA	NA	NA	NA	NA	Dynlt1c	dynein light chain Tctex-type 1C [Source:MGI Symbol;Acc:MGI:3807476]
ENSMUSG00000000581	3.17165	1.12308	4.76514	0.235688	0.813675	NA	C1d	C1D nuclear receptor co-repressor [Source:MGI Symbol;Acc:MGI:1927354]
ENSMUSG00000000594	175.73	2.12161	0.274651	7.72475	1.12e-14	8.69e-13	Gm2a	GM2 ganglioside activator protein [Source:MGI Symbol;Acc:MGI:95762]
ENSMUSG00000000600	10.2304	0.592685	1.95046	0.303869	0.761227	0.928218	Krit1	KRIT1, ankyrin repeat containing [Source:MGI Symbol;Acc:MGI:1930618]
ENSMUSG00000000605	15.492	-0.393427	0.863631	-0.45555	0.648714	0.883377	Clcn4	chloride channel, voltage-sensitive 4 [Source:MGI Symbol;Acc:MGI:104571]
ENSMUSG00000000606	0	NA	NA	NA	NA	NA	Vmn2r88	vomeronasal 2, receptor 88 [Source:MGI Symbol;Acc:MGI:1316662]
ENSMUSG00000000617	0.73223	8.14894	6.10633	1.33451	0.182038	NA	Grm6	glutamate receptor, metabotropic 6 [Source:MGI Symbol;Acc:MGI:1351343]
ENSMUSG00000000627	1.45038	3.73537	4.4265	0.843866	0.398744	NA	Sema4f	sema domain, immunoglobulin domain (Ig), TM domain, and short cytoplasmic domain [Source:MGI Symbol;Acc:MGI:1340055]
ENSMUSG00000000628	15.9528	-1.05131	1.3761	-0.763976	0.444882	0.780733	Hk2	hexokinase 2 [Source:MGI Symbol;Acc:MGI:1315197]
ENSMUSG00000000631	37.2218	0.207372	1.7413	0.11909	0.905204	0.969459	Myo18a	myosin XVIIIA [Source:MGI Symbol;Acc:MGI:2667185]
ENSMUSG00000000632	2.77466	-0.541699	2.51734	-0.215187	0.829621	NA	Sez6	seizure related gene 6 [Source:MGI Symbol;Acc:MGI:104745]
ENSMUSG00000000673	0.111	3.12292	6.22788	0.501441	0.616061	NA	Haao	3-hydroxyanthranilate 3,4-dioxygenase [Source:MGI Symbol;Acc:MGI:1349444]
ENSMUSG00000000682	0.504904	2.98905	6.17408	0.484129	0.628294	NA	Cd52	CD52 antigen [Source:MGI Symbol;Acc:MGI:1346088]
ENSMUSG00000000686	0.561288	2.22296	6.17484	0.360002	0.718846	NA	Abhd15	abhydrolase domain containing 15 [Source:MGI Symbol;Acc:MGI:1914727]
ENSMUSG00000000690	0	NA	NA	NA	NA	NA	Hoxb6	homeobox B6 [Source:MGI Symbol;Acc:MGI:96187]
ENSMUSG00000000693	1.18142	-2.27265	5.11008	-0.444738	0.656509	NA	Loxl3	lysyl oxidase-like 3 [Source:MGI Symbol;Acc:MGI:1337004]
ENSMUSG00000000701	0	NA	NA	NA	NA	NA	Tcl1b5	T cell leukemia/lymphoma 1B, 5 [Source:MGI Symbol;Acc:MGI:1351635]
ENSMUSG00000000706	0.111	3.12292	6.22788	0.501441	0.616061	NA	Btn1a1	butyrophilin, subfamily 1, member A1 [Source:MGI Symbol;Acc:MGI:103118]
ENSMUSG00000000708	23.5287	-1.42491	0.795512	-1.79119	0.0732631	0.316646	Kat2b	K(lysine) acetyltransferase 2B [Source:MGI Symbol;Acc:MGI:1343094]
ENSMUSG00000000711	17.7697	-2.73912	1.82138	-1.50387	0.132615	0.439664	Rab5b	RAB5B, member RAS oncogene family [Source:MGI Symbol;Acc:MGI:105938]
ENSMUSG00000000724	2.63982	3.3072	2.76662	1.19539	0.231933	NA	Cryba1	crystallin, beta A1 [Source:MGI Symbol;Acc:MGI:88518]
ENSMUSG00000000730	2.21927	-1.02129	3.92381	-0.260279	0.794648	NA	Dnmt3l	DNA methyltransferase 3-like [Source:MGI Symbol;Acc:MGI:1859287]
ENSMUSG00000000731	0.299873	-2.25968	6.1349	-0.368331	0.712626	NA	Aire	autoimmune regulator [Source:MGI Symbol;Acc:MGI:1338803]
ENSMUSG00000000732	1.02818	-2.06463	5.70926	-0.361628	0.71763	NA	Icosl	icos ligand [Source:MGI Symbol;Acc:MGI:1354701]
ENSMUSG00000000738	56.1481	0.404235	1.73115	0.233507	0.815368	0.94361	Spg7	SPG7, paraplegin matrix AAA peptidase subunit [Source:MGI Symbol;Acc:MGI:2385906]
ENSMUSG00000000739	4.05303	1.39305	2.86891	0.485566	0.627275	NA	Sult5a1	sulfotransferase family 5A, member 1 [Source:MGI Symbol;Acc:MGI:1931463]
ENSMUSG00000000740	7.14777	1.43932	1.5482	0.929676	0.352539	0.705756	Rpl13	ribosomal protein L13 [Source:MGI Symbol;Acc:MGI:105922]
ENSMUSG00000000743	51.3398	0.629211	0.418914	1.502	0.133096	0.44047	Chmp1a	charged multivesicular body protein 1A [Source:MGI Symbol;Acc:MGI:1920159]
ENSMUSG00000000751	81.5764	-0.62179	1.72399	-0.360669	0.718347	0.912164	Rpa1	replication protein A1 [Source:MGI Symbol;Acc:MGI:1915525]
ENSMUSG00000000753	1.16537	-1.30319	4.21986	-0.308824	0.757456	NA	Serpinf1	serine (or cysteine) peptidase inhibitor, clade F, member 1 [Source:MGI Symbol;Acc:MGI:108080]
ENSMUSG00000000759	5.22637	-1.12089	2.11257	-0.530579	0.595711	0.862617	Tubgcp3	tubulin, gamma complex component 3 [Source:MGI Symbol;Acc:MGI:2183752]
ENSMUSG00000000766	0.241365	-1.38519	6.14737	-0.225331	0.821722	NA	Oprm1	opioid receptor, mu 1 [Source:MGI Symbol;Acc:MGI:97441]
ENSMUSG00000000776	3.52388	0.115999	3.03869	0.0381741	0.969549	NA	Polr3d	polymerase (RNA) III (DNA directed) polypeptide D [Source:MGI Symbol;Acc:MGI:1914315]
ENSMUSG00000000782	12.9907	-0.282878	1.93957	-0.145846	0.884043	0.963642	Tcf7	transcription factor 7, T cell specific [Source:MGI Symbol;Acc:MGI:98507]
ENSMUSG00000000787	20.2874	-1.45244	0.847965	-1.71286	0.0867387	0.34854	Ddx3x	DEAD box helicase 3, X-linked [Source:MGI Symbol;Acc:MGI:103064]
ENSMUSG00000000791	0.174626	3.6194	6.21628	0.582246	0.560401	NA	Il12rb1	interleukin 12 receptor, beta 1 [Source:MGI Symbol;Acc:MGI:104579]
ENSMUSG00000000792	4.09425	-0.27179	2.55487	-0.106381	0.91528	NA	Slc5a5	solute carrier family 5 (sodium iodide symporter), member 5 [Source:MGI Symbol;Acc:MGI:2149330]
ENSMUSG00000000794	3.92024	1.92262	2.23733	0.859336	0.390155	NA	Kcnn3	potassium intermediate/small conductance calcium-activated channel, subfamily N, member 3 [Source:MGI Symbol;Acc:MGI:2153183]
ENSMUSG00000000804	90.2968	0.668548	1.70758	0.391517	0.695415	0.903643	Usp32	ubiquitin specific peptidase 32 [Source:MGI Symbol;Acc:MGI:2144475]
ENSMUSG00000000805	0.0977509	3.17454	6.23278	0.50933	0.610521	NA	Car4	carbonic anhydrase 4 [Source:MGI Symbol;Acc:MGI:1096574]
ENSMUSG00000000811	242.564	0.309375	0.342159	0.904185	0.365897	0.71671	Txnrd3	thioredoxin reductase 3 [Source:MGI Symbol;Acc:MGI:2386711]
ENSMUSG00000000817	0.263129	0.296793	6.1601	0.0481799	0.961573	NA	Fasl	Fas ligand [Source:MGI Symbol;Acc:MGI:99255]
ENSMUSG00000000823	39.9581	1.22718	1.79861	0.68229	0.495055	0.8122	Zfp512b	zinc finger protein 512B [Source:MGI Symbol;Acc:MGI:2685478]
ENSMUSG00000000826	6.62449	0.515115	1.41244	0.364697	0.715337	0.910493	Dnajc5	DnaJ heat shock protein family (Hsp40) member C5 [Source:MGI Symbol;Acc:MGI:892995]
ENSMUSG00000000827	5.84981	0.483883	2.09356	0.231129	0.817215	0.944361	Tpd52l2	tumor protein D52-like 2 [Source:MGI Symbol;Acc:MGI:1913564]
ENSMUSG00000000838	25.7225	-3.94545	1.92694	-2.04752	0.040607	0.216417	Fmr1	fragile X messenger ribonucleoprotein 1 [Source:MGI Symbol;Acc:MGI:95564]
ENSMUSG00000000861	5.13576	-2.37425	2.56964	-0.923962	0.355506	0.708091	Bcl11a	BCL11 transcription factor A [Source:MGI Symbol;Acc:MGI:106190]
ENSMUSG00000000869	1.90183	2.74141	3.12802	0.876405	0.38081	NA	Il4	interleukin 4 [Source:MGI Symbol;Acc:MGI:96556]
ENSMUSG00000000876	2.01087	1.32778	3.57374	0.371538	0.710237	NA	Pxmp4	peroxisomal membrane protein 4 [Source:MGI Symbol;Acc:MGI:1891701]
ENSMUSG00000000881	8.32009	-1.22277	2.25741	-0.541669	0.588047	0.860146	Dlg3	discs large MAGUK scaffold protein 3 [Source:MGI Symbol;Acc:MGI:1888986]
ENSMUSG00000000884	6.44586	-0.0292211	2.43359	-0.0120074	0.99042	0.997594	Gnb1l	guanine nucleotide binding protein (G protein), beta polypeptide 1-like [Source:MGI Symbol;Acc:MGI:1338057]
ENSMUSG00000000889	0.116264	1.28586	6.22954	0.206413	0.836469	NA	Dbh	dopamine beta hydroxylase [Source:MGI Symbol;Acc:MGI:94864]
ENSMUSG00000000901	0.570057	-0.258826	6.12457	-0.0422602	0.966291	NA	Mmp11	matrix metallopeptidase 11 [Source:MGI Symbol;Acc:MGI:97008]
ENSMUSG00000000902	22.0687	-0.498376	1.79747	-0.277265	0.781577	0.933779	Smarcb1	SWI/SNF related, matrix associated, actin dependent regulator of chromatin, subfamily b, member 1 [Source:MGI Symbol;Acc:MGI:1328366]
ENSMUSG00000000903	0.980079	1.52891	5.82634	0.262414	0.793002	NA	Vpreb3	V-set pre-B cell surrogate light chain 3 [Source:MGI Symbol;Acc:MGI:98938]
ENSMUSG00000000915	100.695	1.01029	0.510273	1.9799	0.0477145	0.239586	Hip1r	huntingtin interacting protein 1 related [Source:MGI Symbol;Acc:MGI:1352504]
ENSMUSG00000000916	4.63413	0.178905	2.33198	0.0767184	0.938848	NA	Nsun5	NOL1/NOP2/Sun domain family, member 5 [Source:MGI Symbol;Acc:MGI:2140844]
ENSMUSG00000000934	12.7105	1.1865	0.961583	1.23391	0.217238	0.564359	Top1mt	DNA topoisomerase 1, mitochondrial [Source:MGI Symbol;Acc:MGI:1920210]
ENSMUSG00000000938	0	NA	NA	NA	NA	NA	Hoxa10	homeobox A10 [Source:MGI Symbol;Acc:MGI:96171]
ENSMUSG00000000942	61.0253	2.84801	0.630057	4.52024	6.18e-06	0.000145402	Hoxa4	homeobox A4 [Source:MGI Symbol;Acc:MGI:96176]
ENSMUSG00000000948	0	NA	NA	NA	NA	NA	Gm38393	predicted gene, 38393 [Source:MGI Symbol;Acc:MGI:5613898]
ENSMUSG00000000957	6.45441	2.36781	1.77965	1.33049	0.183356	0.523116	Mmp14	matrix metallopeptidase 14 (membrane-inserted) [Source:MGI Symbol;Acc:MGI:101900]
ENSMUSG00000000958	2.77664	2.44241	2.20877	1.10578	0.268822	NA	Slc7a7	solute carrier family 7 (cationic amino acid transporter, y+ system), member 7 [Source:MGI Symbol;Acc:MGI:1337120]
ENSMUSG00000000959	40.8033	-0.0264688	0.861368	-0.0307288	0.975486	0.991531	Oxa1l	oxidase assembly 1-like [Source:MGI Symbol;Acc:MGI:1916339]
ENSMUSG00000000976	4.69008	-0.0488072	2.02254	-0.0241316	0.980748	NA	Heatr6	HEAT repeat containing 6 [Source:MGI Symbol;Acc:MGI:1919790]
ENSMUSG00000000982	0.559001	-2.93136	6.13017	-0.478185	0.632519	NA	Ccl3	C-C motif chemokine ligand 3 [Source:MGI Symbol;Acc:MGI:98260]
ENSMUSG00000000983	0	NA	NA	NA	NA	NA	Wfdc18	WAP four-disulfide core domain 18 [Source:MGI Symbol;Acc:MGI:107506]
ENSMUSG00000001014	0	NA	NA	NA	NA	NA	Icam4	intercellular adhesion molecule 4, Landsteiner-Wiener blood group [Source:MGI Symbol;Acc:MGI:1925619]
ENSMUSG00000001016	97.811	-1.51102	0.42046	-3.59373	0.00032598	0.00496319	Ilf2	interleukin enhancer binding factor 2 [Source:MGI Symbol;Acc:MGI:1915031]
ENSMUSG00000001017	14.7347	0.459566	1.96064	0.234396	0.814678	0.943251	Chtop	chromatin target of PRMT1 [Source:MGI Symbol;Acc:MGI:1913761]
ENSMUSG00000001018	6.70899	0.731101	1.92603	0.379589	0.704251	0.906712	Snapin	SNAP-associated protein [Source:MGI Symbol;Acc:MGI:1333745]
ENSMUSG00000001020	0	NA	NA	NA	NA	NA	S100a4	S100 calcium binding protein A4 [Source:MGI Symbol;Acc:MGI:1330282]
ENSMUSG00000001021	0	NA	NA	NA	NA	NA	S100a3	S100 calcium binding protein A3 [Source:MGI Symbol;Acc:MGI:1338849]
ENSMUSG00000001023	0	NA	NA	NA	NA	NA	S100a5	S100 calcium binding protein A5 [Source:MGI Symbol;Acc:MGI:1338915]
ENSMUSG00000001025	1.50342	-4.6357	6.12328	-0.757062	0.449013	NA	S100a6	S100 calcium binding protein A6 (calcyclin) [Source:MGI Symbol;Acc:MGI:1339467]
ENSMUSG00000001027	5.49086	5.10479	2.42961	2.10107	0.0356344	0.197725	Scn4a	sodium channel, voltage-gated, type IV, alpha [Source:MGI Symbol;Acc:MGI:98250]
ENSMUSG00000001029	0	NA	NA	NA	NA	NA	Icam2	intercellular adhesion molecule 2 [Source:MGI Symbol;Acc:MGI:96394]
ENSMUSG00000001034	2.49268	-1.25881	2.67939	-0.469811	0.63849	NA	Mapk7	mitogen-activated protein kinase 7 [Source:MGI Symbol;Acc:MGI:1346347]
ENSMUSG00000001036	4.90238	-1.08611	2.25639	-0.481348	0.630269	0.87771	Epn2	epsin 2 [Source:MGI Symbol;Acc:MGI:1333766]
ENSMUSG00000001039	46.8733	-0.265693	1.76291	-0.150712	0.880203	0.963085	B9d1	B9 protein domain 1 [Source:MGI Symbol;Acc:MGI:1351471]
ENSMUSG00000001052	70.0306	-0.311373	0.64732	-0.481019	0.630503	0.87771	Sec24b	SEC24 homolog B, COPII coat complex component [Source:MGI Symbol;Acc:MGI:2139764]
ENSMUSG00000001053	19.1018	2.32776	0.689262	3.37718	0.00073233	0.0099916	N4bp3	NEDD4 binding protein 3 [Source:MGI Symbol;Acc:MGI:2442218]
ENSMUSG00000001054	14.9535	0.786648	1.85879	0.423205	0.672146	0.894838	Rmnd5b	required for meiotic nuclear division 5 homolog B [Source:MGI Symbol;Acc:MGI:1913339]
ENSMUSG00000001056	4.39262	2.14891	2.59954	0.826652	0.408434	NA	Nhp2	NHP2 ribonucleoprotein [Source:MGI Symbol;Acc:MGI:1098547]
ENSMUSG00000001062	7.83048	4.72878	3.03474	1.55821	0.119183	0.417996	Vps9d1	VPS9 domain containing 1 [Source:MGI Symbol;Acc:MGI:1914143]
ENSMUSG00000001065	2.60371	-0.601101	2.85536	-0.210517	0.833264	NA	Zfp276	zinc finger protein (C2H2 type) 276 [Source:MGI Symbol;Acc:MGI:1888495]
ENSMUSG00000001076	2.59297	9.57414	2.55908	3.74124	0.000183117	NA	C1ql4	complement component 1, q subcomponent-like 4 [Source:MGI Symbol;Acc:MGI:3579909]
ENSMUSG00000001082	0.94419	-2.59708	5.84491	-0.444333	0.656802	NA	Mfsd10	major facilitator superfamily domain containing 10 [Source:MGI Symbol;Acc:MGI:1915544]
ENSMUSG00000001089	279.078	3.03382	1.68095	1.80482	0.0711026	0.310376	Luzp1	leucine zipper protein 1 [Source:MGI Symbol;Acc:MGI:107629]
ENSMUSG00000001095	1.30298	3.32237	6.10504	0.544202	0.586302	NA	Slc13a2	solute carrier family 13 (sodium-dependent dicarboxylate transporter), member 2 [Source:MGI Symbol;Acc:MGI:1276558]
ENSMUSG00000001098	14.2277	-0.200301	1.97	-0.101676	0.919014	0.975188	Kctd10	potassium channel tetramerisation domain containing 10 [Source:MGI Symbol;Acc:MGI:2141207]
ENSMUSG00000001100	46.9211	1.13922	0.661757	1.72151	0.0851588	0.344534	Poldip2	polymerase (DNA-directed), delta interacting protein 2 [Source:MGI Symbol;Acc:MGI:1915061]
ENSMUSG00000001103	0.2875	3.9262	6.21009	0.63223	0.527237	NA	Sebox	SEBOX homeobox [Source:MGI Symbol;Acc:MGI:108012]
ENSMUSG00000001105	13.2907	-1.28455	1.92403	-0.667633	0.504368	0.816156	Ift20	intraflagellar transport 20 [Source:MGI Symbol;Acc:MGI:1915585]
ENSMUSG00000001119	12.3987	-1.73589	1.36212	-1.2744	0.202521	0.545382	Col6a1	collagen, type VI, alpha 1 [Source:MGI Symbol;Acc:MGI:88459]
ENSMUSG00000001120	38.1513	0.413494	1.76628	0.234104	0.814904	0.943251	Pcbp3	poly(rC) binding protein 3 [Source:MGI Symbol;Acc:MGI:1890470]
ENSMUSG00000001123	0.525246	9.08173	6.10633	1.48726	0.136945	NA	Lgals9	lectin, galactose binding, soluble 9 [Source:MGI Symbol;Acc:MGI:109496]
ENSMUSG00000001127	4.34255	0.666678	2.31072	0.288515	0.772952	NA	Araf	Araf proto-oncogene, serine/threonine kinase [Source:MGI Symbol;Acc:MGI:88065]
ENSMUSG00000001128	0.786491	-16.8637	6.06883	-2.77874	0.00545696	NA	Cfp	complement factor properdin [Source:MGI Symbol;Acc:MGI:97545]
ENSMUSG00000001131	0.0873128	3.14676	6.23021	0.505081	0.613502	NA	Timp1	tissue inhibitor of metalloproteinase 1 [Source:MGI Symbol;Acc:MGI:98752]
ENSMUSG00000001134	0.568218	10.7863	6.10552	1.76665	0.0772871	NA	Uxt	ubiquitously expressed prefoldin like chaperone [Source:MGI Symbol;Acc:MGI:1277988]
ENSMUSG00000001138	1.20499	2.32606	6.06778	0.383346	0.701463	NA	Cnnm3	cyclin M3 [Source:MGI Symbol;Acc:MGI:2151055]
ENSMUSG00000001143	10.5986	-0.609215	2.024	-0.300996	0.763418	0.928763	Lman2l	lectin, mannose-binding 2-like [Source:MGI Symbol;Acc:MGI:2443010]
ENSMUSG00000001150	54.459	-0.614345	0.43827	-1.40175	0.16099	0.488027	Mcm3ap	minichromosome maintenance complex component 3 associated protein [Source:MGI Symbol;Acc:MGI:1930089]
ENSMUSG00000001151	165.774	1.82572	1.69312	1.07832	0.280892	0.637493	Pcnt	pericentrin (kendrin) [Source:MGI Symbol;Acc:MGI:102722]
ENSMUSG00000001155	0.153596	-0.769223	6.16144	-0.124845	0.900647	NA	Ftcd	formiminotransferase cyclodeaminase [Source:MGI Symbol;Acc:MGI:1339962]
ENSMUSG00000001156	62.4705	1.7961	0.576771	3.11406	0.00184532	0.0214871	Mxd1	MAX dimerization protein 1 [Source:MGI Symbol;Acc:MGI:96908]
ENSMUSG00000001157	74.009	1.47782	0.412136	3.58577	0.000336081	0.00507371	Gmcl1	germ cell-less, spermatogenesis associated 1 [Source:MGI Symbol;Acc:MGI:1345156]
ENSMUSG00000001158	12.338	-1.60976	1.97787	-0.813884	0.415712	0.759381	Snrnp27	small nuclear ribonucleoprotein 27 (U4/U6.U5) [Source:MGI Symbol;Acc:MGI:1913868]
ENSMUSG00000001166	0	NA	NA	NA	NA	NA	Oas1c	2'-5' oligoadenylate synthetase 1C [Source:MGI Symbol;Acc:MGI:2149633]
ENSMUSG00000001168	0.116264	1.28586	6.22954	0.206413	0.836469	NA	Oas1h	2'-5' oligoadenylate synthetase 1H [Source:MGI Symbol;Acc:MGI:2180853]
ENSMUSG00000001173	0.45128	-2.74973	6.13077	-0.448513	0.653783	NA	Ocrl	OCRL, inositol polyphosphate-5-phosphatase [Source:MGI Symbol;Acc:MGI:109589]
ENSMUSG00000001175	447.247	-4.57797	1.47139	-3.11134	0.00186243	0.0216393	Calm1	calmodulin 1 [Source:MGI Symbol;Acc:MGI:88251]
ENSMUSG00000001211	265.85	3.24665	0.437114	7.42746	1.11e-13	8.11e-12	Agpat3	1-acylglycerol-3-phosphate O-acyltransferase 3 [Source:MGI Symbol;Acc:MGI:1336186]
ENSMUSG00000001225	0.985551	1.21648	6.16818	0.197219	0.843656	NA	Slc26a3	solute carrier family 26, member 3 [Source:MGI Symbol;Acc:MGI:107181]
ENSMUSG00000001227	0.0219423	1.25104	6.23278	0.200719	0.840918	NA	Sema6b	sema domain, transmembrane domain (TM), and cytoplasmic domain, (semaphorin) 6B [Source:MGI Symbol;Acc:MGI:1202889]
ENSMUSG00000001228	37.8158	-1.37318	1.76189	-0.779378	0.435757	0.773434	Uhrf1	ubiquitin-like, containing PHD and RING finger domains, 1 [Source:MGI Symbol;Acc:MGI:1338889]
ENSMUSG00000001229	1.30438	3.69633	5.44059	0.679399	0.496885	NA	Dpp9	dipeptidylpeptidase 9 [Source:MGI Symbol;Acc:MGI:2443967]
ENSMUSG00000001240	0.411353	-2.56829	6.13192	-0.418839	0.675334	NA	Ramp2	receptor (calcitonin) activity modifying protein 2 [Source:MGI Symbol;Acc:MGI:1859650]
ENSMUSG00000001247	2.42237	4.82706	4.52701	1.06628	0.286297	NA	Lsr	lipolysis stimulated lipoprotein receptor [Source:MGI Symbol;Acc:MGI:1927471]
ENSMUSG00000001248	4.02412	0.824974	2.52451	0.326786	0.743829	NA	Gramd1a	GRAM domain containing 1A [Source:MGI Symbol;Acc:MGI:105490]
ENSMUSG00000001249	0	NA	NA	NA	NA	NA	Hpn	hepsin [Source:MGI Symbol;Acc:MGI:1196620]
ENSMUSG00000001260	0.1765	3.17449	6.23278	0.509321	0.610527	NA	Gabrg1	gamma-aminobutyric acid type A receptor subunit gamma 1 [Source:MGI Symbol;Acc:MGI:103156]
ENSMUSG00000001270	0.287912	0.244307	6.1444	0.039761	0.968284	NA	Ckb	creatine kinase, brain [Source:MGI Symbol;Acc:MGI:88407]
ENSMUSG00000001280	29.0076	1.163	0.637807	1.82343	0.0682384	0.302862	Sp1	trans-acting transcription factor 1 [Source:MGI Symbol;Acc:MGI:98372]
ENSMUSG00000001281	1.7018	-1.23557	4.553	-0.271376	0.786102	NA	Itgb7	integrin beta 7 [Source:MGI Symbol;Acc:MGI:96616]
ENSMUSG00000001285	13.2965	-2.27232	1.96963	-1.15368	0.248631	0.602617	Myg1	melanocyte proliferating gene 1 [Source:MGI Symbol;Acc:MGI:1929864]
ENSMUSG00000001288	0.360444	-0.658133	6.13553	-0.107266	0.914578	NA	Rarg	retinoic acid receptor, gamma [Source:MGI Symbol;Acc:MGI:97858]
ENSMUSG00000001289	206.815	1.14648	1.68209	0.681579	0.495505	0.812638	Pfdn5	prefoldin 5 [Source:MGI Symbol;Acc:MGI:1928753]
ENSMUSG00000001300	15.591	-3.16101	1.74586	-1.81057	0.0702072	0.308191	Efnb2	ephrin B2 [Source:MGI Symbol;Acc:MGI:105097]
ENSMUSG00000001305	19.8331	-0.0780837	1.71853	-0.0454364	0.963759	0.98662	Rrp15	ribosomal RNA processing 15 homolog [Source:MGI Symbol;Acc:MGI:1914473]
ENSMUSG00000001313	0.582799	1.91193	6.10671	0.313088	0.754214	NA	Rnd2	Rho family GTPase 2 [Source:MGI Symbol;Acc:MGI:1338755]
ENSMUSG00000001323	9.69631	1.97664	1.41327	1.39863	0.161923	0.489046	Srr	serine racemase [Source:MGI Symbol;Acc:MGI:1351636]
ENSMUSG00000001333	11.0165	2.39697	1.96014	1.22286	0.221384	0.568377	Sync	syncoilin [Source:MGI Symbol;Acc:MGI:1916078]
ENSMUSG00000001334	19.5032	2.06228	1.7798	1.15872	0.246571	0.600923	Fndc5	fibronectin type III domain containing 5 [Source:MGI Symbol;Acc:MGI:1917614]
ENSMUSG00000001348	1.11669	-4.21464	6.12411	-0.688204	0.491324	NA	Acp5	acid phosphatase 5, tartrate resistant [Source:MGI Symbol;Acc:MGI:87883]
ENSMUSG00000001349	9.76749	0.355871	2.18221	0.163078	0.870457	0.962229	Cnn1	calponin 1 [Source:MGI Symbol;Acc:MGI:104979]
ENSMUSG00000001366	12.7763	0.31252	1.42345	0.219551	0.826221	0.947673	Fbxo9	f-box protein 9 [Source:MGI Symbol;Acc:MGI:1918788]
ENSMUSG00000001376	12.3999	-2.08426	1.92055	-1.08524	0.277813	0.635395	Vps50	VPS50 EARP/GARPII complex subunit [Source:MGI Symbol;Acc:MGI:1920538]
ENSMUSG00000001380	30.1873	-1.60494	0.789682	-2.03239	0.0421139	0.222079	Hars1	histidyl-tRNA synthetase 1 [Source:MGI Symbol;Acc:MGI:108087]
ENSMUSG00000001383	38.0777	-1.06533	0.662823	-1.60726	0.107998	0.395325	Zmat2	zinc finger, matrin type 2 [Source:MGI Symbol;Acc:MGI:1913742]
ENSMUSG00000001403	8.55734	0.916046	1.67055	0.548351	0.583451	0.858203	Ube2c	ubiquitin-conjugating enzyme E2C [Source:MGI Symbol;Acc:MGI:1915862]
ENSMUSG00000001415	136.45	0.636743	0.26967	2.36119	0.0182162	0.123554	Smg5	SMG5 nonsense mediated mRNA decay factor [Source:MGI Symbol;Acc:MGI:2447364]
ENSMUSG00000001416	301.453	-1.38617	1.68497	-0.822672	0.410695	0.756353	Cct3	chaperonin containing TCP1 subunit 3 [Source:MGI Symbol;Acc:MGI:104708]
ENSMUSG00000001418	1.4626	0.449226	6.03469	0.0744406	0.94066	NA	Glmp	glycosylated lysosomal membrane protein [Source:MGI Symbol;Acc:MGI:1913318]
ENSMUSG00000001419	8.74196	-0.231259	1.78012	-0.129912	0.896636	0.966922	Mef2d	myocyte enhancer factor 2D [Source:MGI Symbol;Acc:MGI:99533]
ENSMUSG00000001420	2.41202	1.59937	2.57494	0.621127	0.534516	NA	Tmem79	transmembrane protein 79 [Source:MGI Symbol;Acc:MGI:1919163]
ENSMUSG00000001424	16.1922	-1.52605	0.943119	-1.61808	0.105645	0.389879	Snd1	staphylococcal nuclease and tudor domain containing 1 [Source:MGI Symbol;Acc:MGI:1929266]
ENSMUSG00000001435	6.0027	2.72585	2.39806	1.13669	0.255667	0.609658	Col18a1	collagen, type XVIII, alpha 1 [Source:MGI Symbol;Acc:MGI:88451]
ENSMUSG00000001436	1.12302	-0.790596	6.08259	-0.129977	0.896585	NA	Slc19a1	solute carrier family 19 (folate transporter), member 1 [Source:MGI Symbol;Acc:MGI:103182]
ENSMUSG00000001440	239.1	-0.100943	0.327768	-0.307972	0.758104	0.927045	Kpnb1	karyopherin subunit beta 1 [Source:MGI Symbol;Acc:MGI:107532]
ENSMUSG00000001441	32.5392	0.880022	0.814647	1.08025	0.280031	0.637384	Npepps	aminopeptidase puromycin sensitive [Source:MGI Symbol;Acc:MGI:1101358]
ENSMUSG00000001444	1.41657	1.73065	4.25424	0.406806	0.684151	NA	Tbx21	T-box 21 [Source:MGI Symbol;Acc:MGI:1888984]
ENSMUSG00000001445	37.4227	-1.04977	0.517464	-2.02867	0.0424915	0.223074	Mrpl10	mitochondrial ribosomal protein L10 [Source:MGI Symbol;Acc:MGI:1333801]
ENSMUSG00000001467	47.5587	1.52398	0.6072	2.50986	0.012078	0.0923184	Cyp51	cytochrome P450, family 51 [Source:MGI Symbol;Acc:MGI:106040]
ENSMUSG00000001472	10.2061	1.76144	2.15278	0.818216	0.413234	0.758876	Tcf25	transcription factor 25 (basic helix-loop-helix) [Source:MGI Symbol;Acc:MGI:1914105]
ENSMUSG00000001473	55.1845	-0.824894	0.581453	-1.41868	0.155993	0.482628	Tubb6	tubulin, beta 6 class V [Source:MGI Symbol;Acc:MGI:1915201]
ENSMUSG00000001482	0.742212	5.53631	6.15308	0.899763	0.368247	NA	Def8	differentially expressed in FDCP 8 [Source:MGI Symbol;Acc:MGI:1346331]
ENSMUSG00000001493	3.59209	3.2036	2.65122	1.20835	0.226913	NA	Meox1	mesenchyme homeobox 1 [Source:MGI Symbol;Acc:MGI:103220]
ENSMUSG00000001494	6.88042	-1.84281	2.20944	-0.834062	0.404246	0.749734	Sost	sclerostin [Source:MGI Symbol;Acc:MGI:1921749]
ENSMUSG00000001496	0	NA	NA	NA	NA	NA	Nkx2-1	NK2 homeobox 1 [Source:MGI Symbol;Acc:MGI:108067]
ENSMUSG00000001497	0.741833	0.184053	6.08007	0.0302716	0.97585	NA	Pax9	paired box 9 [Source:MGI Symbol;Acc:MGI:97493]
ENSMUSG00000001504	1.52546	4.18717	2.98615	1.4022	0.160857	NA	Irx2	Iroquois homeobox 2 [Source:MGI Symbol;Acc:MGI:1197526]
ENSMUSG00000001506	10.8827	0.614325	1.46112	0.420449	0.674158	0.89575	Col1a1	collagen, type I, alpha 1 [Source:MGI Symbol;Acc:MGI:88467]
ENSMUSG00000001507	0.152129	-0.482285	6.17538	-0.0780981	0.93775	NA	Itga3	integrin alpha 3 [Source:MGI Symbol;Acc:MGI:96602]
ENSMUSG00000001508	2.0173	2.54347	3.85041	0.660572	0.508887	NA	Sgca	sarcoglycan, alpha (dystrophin-associated glycoprotein) [Source:MGI Symbol;Acc:MGI:894698]
ENSMUSG00000001510	0	NA	NA	NA	NA	NA	Dlx3	distal-less homeobox 3 [Source:MGI Symbol;Acc:MGI:94903]
ENSMUSG00000001517	192.123	1.87996	0.288803	6.50951	7.54e-11	3.9e-09	Foxm1	forkhead box M1 [Source:MGI Symbol;Acc:MGI:1347487]
ENSMUSG00000001518	3.2978	-0.44077	2.65512	-0.166007	0.868151	NA	Itfg2	integrin alpha FG-GAP repeat containing 2 [Source:MGI Symbol;Acc:MGI:1915450]
ENSMUSG00000001520	0.594518	1.46241	6.14444	0.238005	0.811877	NA	Nrip2	nuclear receptor interacting protein 2 [Source:MGI Symbol;Acc:MGI:1891884]
ENSMUSG00000001521	1.5962	-0.665584	3.96648	-0.167802	0.866739	NA	Tulp3	tubby-like protein 3 [Source:MGI Symbol;Acc:MGI:1329045]
ENSMUSG00000001524	20.2728	-0.458643	1.87034	-0.245219	0.806287	0.9406	Gtf2h4	general transcription factor II H, polypeptide 4 [Source:MGI Symbol;Acc:MGI:1338799]
ENSMUSG00000001525	20.8108	0.565246	0.907949	0.622553	0.533578	0.834847	Tubb5	tubulin, beta 5 class I [Source:MGI Symbol;Acc:MGI:107812]
ENSMUSG00000001542	67.7919	2.36818	0.494017	4.79372	1.64e-06	4.42e-05	Ell2	elongation factor for RNA polymerase II 2 [Source:MGI Symbol;Acc:MGI:2183438]
ENSMUSG00000001552	24.2711	0.417482	1.8094	0.230729	0.817525	0.944374	Jup	junction plakoglobin [Source:MGI Symbol;Acc:MGI:96650]
ENSMUSG00000001555	2.69038	-3.55586	3.00375	-1.18381	0.23649	NA	Fkbp10	FK506 binding protein 10 [Source:MGI Symbol;Acc:MGI:104769]
ENSMUSG00000001558	778.386	0.585164	0.153899	3.80225	0.000143387	0.00239527	Klhl10	kelch-like 10 [Source:MGI Symbol;Acc:MGI:2181067]
ENSMUSG00000001566	0.358388	-2.49806	6.13251	-0.407347	0.683753	NA	Mnx1	motor neuron and pancreas homeobox 1 [Source:MGI Symbol;Acc:MGI:109160]
ENSMUSG00000001569	23.2167	-0.87546	1.17516	-0.744971	0.456289	0.78683	Nom1	nucleolar protein with MIF4G domain 1 [Source:MGI Symbol;Acc:MGI:1861749]
ENSMUSG00000001576	20.4622	1.63843	0.997123	1.64316	0.10035	0.377559	Ergic1	endoplasmic reticulum-golgi intermediate compartment 1 [Source:MGI Symbol;Acc:MGI:1914708]
ENSMUSG00000001583	0.887237	3.85389	4.71456	0.817445	0.413674	NA	Tnk1	tyrosine kinase, non-receptor, 1 [Source:MGI Symbol;Acc:MGI:1930958]
ENSMUSG00000001588	5.441	0.560819	1.459	0.384386	0.700692	0.905308	Acap1	ArfGAP with coiled-coil, ankyrin repeat and PH domains 1 [Source:MGI Symbol;Acc:MGI:2388270]
ENSMUSG00000001604	0.241365	-1.38519	6.14737	-0.225331	0.821722	NA	Tcea3	transcription elongation factor A (SII), 3 [Source:MGI Symbol;Acc:MGI:1196908]
ENSMUSG00000001622	0.950481	5.7186	6.14853	0.930076	0.352332	NA	Csn3	casein kappa [Source:MGI Symbol;Acc:MGI:107461]
ENSMUSG00000001627	7.9646	-1.95107	1.36051	-1.43408	0.15155	0.474473	Ifrd1	interferon-related developmental regulator 1 [Source:MGI Symbol;Acc:MGI:1316717]
ENSMUSG00000001630	2.52275	-3.40641	2.30248	-1.47945	0.139019	NA	Stk38l	serine/threonine kinase 38 like [Source:MGI Symbol;Acc:MGI:1922250]
ENSMUSG00000001632	11.8444	-1.4518	1.91202	-0.759304	0.447671	0.781844	Brpf1	bromodomain and PHD finger containing, 1 [Source:MGI Symbol;Acc:MGI:1926033]
ENSMUSG00000001642	2.1087	1.56861	2.76716	0.566867	0.570804	NA	Akr1b1	aldo-keto reductase family 1 member B [Source:MGI Symbol;Acc:MGI:1353494]
ENSMUSG00000001655	0.664006	3.52871	6.18515	0.570514	0.568329	NA	Hoxc13	homeobox C13 [Source:MGI Symbol;Acc:MGI:99560]
ENSMUSG00000001656	0	NA	NA	NA	NA	NA	Hoxc11	homeobox C11 [Source:MGI Symbol;Acc:MGI:96193]
ENSMUSG00000001657	0	NA	NA	NA	NA	NA	Hoxc8	homeobox C8 [Source:MGI Symbol;Acc:MGI:96198]
ENSMUSG00000001661	0.1765	3.17449	6.23278	0.509321	0.610527	NA	Hoxc6	homeobox C6 [Source:MGI Symbol;Acc:MGI:96197]
ENSMUSG00000001663	0.4517	-1.5967	6.13185	-0.260394	0.79456	NA	Gstt1	glutathione S-transferase, theta 1 [Source:MGI Symbol;Acc:MGI:107379]
ENSMUSG00000001665	12.9214	-0.615271	0.953299	-0.645412	0.51866	0.825856	Gstt3	glutathione S-transferase, theta 3 [Source:MGI Symbol;Acc:MGI:2143526]
ENSMUSG00000001666	12.562	-0.436572	1.33878	-0.326097	0.744351	0.921907	Ddt	D-dopachrome tautomerase [Source:MGI Symbol;Acc:MGI:1298381]
ENSMUSG00000001670	2.12897	-0.672522	4.67669	-0.143803	0.885656	NA	Tat	tyrosine aminotransferase [Source:MGI Symbol;Acc:MGI:98487]
ENSMUSG00000001672	0.440981	4.3416	6.1937	0.700971	0.483321	NA	Marveld3	MARVEL (membrane-associating) domain containing 3 [Source:MGI Symbol;Acc:MGI:1920858]
ENSMUSG00000001674	19.5404	-0.782137	0.985844	-0.793368	0.427564	0.767099	Ddx18	DEAD box helicase 18 [Source:MGI Symbol;Acc:MGI:1914192]
ENSMUSG00000001687	46.2698	1.95832	1.44556	1.35471	0.17551	0.512799	Ubl3	ubiquitin-like 3 [Source:MGI Symbol;Acc:MGI:1344373]
ENSMUSG00000001700	3.70778	3.71542	4.60368	0.807053	0.419636	NA	Gramd2b	GRAM domain containing 2B [Source:MGI Symbol;Acc:MGI:1914815]
ENSMUSG00000001707	5.31343	1.5507	2.48795	0.623285	0.533098	0.834727	Eef1e1	eukaryotic translation elongation factor 1 epsilon 1 [Source:MGI Symbol;Acc:MGI:1913393]
ENSMUSG00000001729	10.5442	0.539646	1.00229	0.538414	0.590291	0.860858	Akt1	thymoma viral proto-oncogene 1 [Source:MGI Symbol;Acc:MGI:87986]
ENSMUSG00000001739	0	NA	NA	NA	NA	NA	Cldn15	claudin 15 [Source:MGI Symbol;Acc:MGI:1913103]
ENSMUSG00000001741	0.558175	-4.68846	6.11722	-0.766436	0.443417	NA	Il16	interleukin 16 [Source:MGI Symbol;Acc:MGI:1270855]
ENSMUSG00000001750	0.564819	8.27561	6.11284	1.35381	0.175798	NA	Tcirg1	T cell, immune regulator 1, ATPase, H+ transporting, lysosomal V0 protein A3 [Source:MGI Symbol;Acc:MGI:1350931]
ENSMUSG00000001751	59.1818	-0.748154	0.437698	-1.70929	0.0873965	0.350081	Naglu	alpha-N-acetylglucosaminidase (Sanfilippo disease IIIB) [Source:MGI Symbol;Acc:MGI:1351641]
ENSMUSG00000001755	6.14608	0.111414	2.10547	0.0529166	0.957798	0.985203	Coasy	Coenzyme A synthase [Source:MGI Symbol;Acc:MGI:1918993]
ENSMUSG00000001761	19.6913	4.81956	1.81226	2.65942	0.00782753	0.0665551	Smo	smoothened, frizzled class receptor [Source:MGI Symbol;Acc:MGI:108075]
ENSMUSG00000001763	0.792281	3.72646	6.08253	0.61265	0.540108	NA	Tspan33	tetraspanin 33 [Source:MGI Symbol;Acc:MGI:1919012]
ENSMUSG00000001767	116.67	-0.591378	0.385232	-1.53512	0.124754	0.427681	Crnkl1	crooked neck pre-mRNA splicing factor 1 [Source:MGI Symbol;Acc:MGI:1914127]
ENSMUSG00000001768	4.0797	-0.873369	2.78828	-0.313228	0.754107	NA	Rin2	Ras and Rab interactor 2 [Source:MGI Symbol;Acc:MGI:1921280]
ENSMUSG00000001773	1.40128	-0.542468	3.87818	-0.139877	0.888757	NA	Folh1	folate hydrolase 1 [Source:MGI Symbol;Acc:MGI:1858193]
ENSMUSG00000001774	14.5134	0.89702	1.2965	0.691876	0.489015	0.809394	Chordc1	cysteine and histidine rich domain containing 1 [Source:MGI Symbol;Acc:MGI:1914167]
ENSMUSG00000001783	32.0278	-0.896485	0.624889	-1.43463	0.151392	0.474135	Rtcb	RNA 2',3'-cyclic phosphate and 5'-OH ligase [Source:MGI Symbol;Acc:MGI:106379]
ENSMUSG00000001785	27.2499	1.50968	0.64593	2.33722	0.0194278	0.129816	Pwp1	PWP1 homolog, endonuclein [Source:MGI Symbol;Acc:MGI:1914735]
ENSMUSG00000001786	9.57382	0.463224	1.95789	0.236594	0.812972	0.942472	Fbxo7	F-box protein 7 [Source:MGI Symbol;Acc:MGI:1917004]
ENSMUSG00000001794	68.6295	1.9894	1.52902	1.30109	0.193227	0.53541	Capns1	calpain, small subunit 1 [Source:MGI Symbol;Acc:MGI:88266]
ENSMUSG00000001802	0	NA	NA	NA	NA	NA	Lrp3	low density lipoprotein receptor-related protein 3 [Source:MGI Symbol;Acc:MGI:3584516]
ENSMUSG00000001804	0.322515	2.21275	6.23278	0.355018	0.722576	NA	Dsg4	desmoglein 4 [Source:MGI Symbol;Acc:MGI:2661061]
ENSMUSG00000001815	1.1258	2.79854	5.62518	0.497502	0.618835	NA	Evx2	even-skipped homeobox 2 [Source:MGI Symbol;Acc:MGI:95462]
ENSMUSG00000001819	0	NA	NA	NA	NA	NA	Hoxd13	homeobox D13 [Source:MGI Symbol;Acc:MGI:96205]
ENSMUSG00000001823	0	NA	NA	NA	NA	NA	Hoxd12	homeobox D12 [Source:MGI Symbol;Acc:MGI:96204]
ENSMUSG00000001827	2.29437	5.45011	4.77135	1.14226	0.253347	NA	Folr1	folate receptor alpha [Source:MGI Symbol;Acc:MGI:95568]
ENSMUSG00000001829	604.574	4.4562	0.773883	5.75824	8.5e-09	3.35e-07	Clpb	ClpB caseinolytic peptidase B [Source:MGI Symbol;Acc:MGI:1100517]
ENSMUSG00000001833	21.8704	-1.54168	2.19399	-0.702685	0.482252	0.804959	Septin7	septin 7 [Source:MGI Symbol;Acc:MGI:1335094]
ENSMUSG00000001844	20.9434	3.78624	2.06096	1.83713	0.0661906	0.297884	Zdhhc4	zinc finger, DHHC domain containing 4 [Source:MGI Symbol;Acc:MGI:1920131]
ENSMUSG00000001847	9.27156	-0.49688	1.23959	-0.400841	0.688537	0.899436	Rac1	Rac family small GTPase 1 [Source:MGI Symbol;Acc:MGI:97845]
ENSMUSG00000001855	120.149	0.230672	0.329165	0.700779	0.483441	0.806005	Nup214	nucleoporin 214 [Source:MGI Symbol;Acc:MGI:1095411]
ENSMUSG00000001864	2.65492	1.65841	2.85162	0.581568	0.560858	NA	Aif1l	allograft inflammatory factor 1-like [Source:MGI Symbol;Acc:MGI:1919598]
ENSMUSG00000001865	0.222	3.58466	6.21502	0.576774	0.564092	NA	Cpa3	carboxypeptidase A3, mast cell [Source:MGI Symbol;Acc:MGI:88479]
ENSMUSG00000001870	5.49985	1.60426	2.33891	0.685901	0.492776	0.811282	Ltbp1	latent transforming growth factor beta binding protein 1 [Source:MGI Symbol;Acc:MGI:109151]
ENSMUSG00000001891	15.2176	-1.0925	1.83818	-0.594337	0.552287	0.843979	Ugp2	UDP-glucose pyrophosphorylase 2 [Source:MGI Symbol;Acc:MGI:2183447]
ENSMUSG00000001901	4.5392	-0.066056	2.80076	-0.023585	0.981184	NA	Kcnh6	potassium voltage-gated channel, subfamily H (eag-related), member 6 [Source:MGI Symbol;Acc:MGI:2684139]
ENSMUSG00000001909	53.8231	3.22616	1.34657	2.39583	0.0165828	0.115884	Trmt1	tRNA methyltransferase 1 [Source:MGI Symbol;Acc:MGI:1289155]
ENSMUSG00000001910	16.6256	1.20312	0.927977	1.2965	0.194804	0.536749	Nacc1	nucleus accumbens associated 1, BEN and BTB (POZ) domain containing [Source:MGI Symbol;Acc:MGI:1914080]
ENSMUSG00000001911	1.31937	0.138597	3.3864	0.0409275	0.967354	NA	Nfix	nuclear factor I/X [Source:MGI Symbol;Acc:MGI:97311]
ENSMUSG00000001918	4.26814	-0.62765	2.42314	-0.259023	0.795617	NA	Slc1a5	solute carrier family 1 (neutral amino acid transporter), member 5 [Source:MGI Symbol;Acc:MGI:105305]
ENSMUSG00000001924	163.834	0.0546067	1.68979	0.0323156	0.97422	0.991207	Uba1	ubiquitin-like modifier activating enzyme 1 [Source:MGI Symbol;Acc:MGI:98890]
ENSMUSG00000001930	16.2024	2.61186	1.94564	1.34242	0.179461	0.518267	Vwf	Von Willebrand factor [Source:MGI Symbol;Acc:MGI:98941]
ENSMUSG00000001942	5.34681	-4.20601	1.76996	-2.37632	0.0174861	0.120416	Siae	sialic acid acetylesterase [Source:MGI Symbol;Acc:MGI:104803]
ENSMUSG00000001943	0	NA	NA	NA	NA	NA	Vsig2	V-set and immunoglobulin domain containing 2 [Source:MGI Symbol;Acc:MGI:1928009]
ENSMUSG00000001946	0.439629	1.43082	6.15534	0.232452	0.816187	NA	Esam	endothelial cell-specific adhesion molecule [Source:MGI Symbol;Acc:MGI:1916774]
ENSMUSG00000001948	849.361	1.71702	1.6876	1.01743	0.30895	0.667532	Spa17	sperm autoantigenic protein 17 [Source:MGI Symbol;Acc:MGI:1333778]
ENSMUSG00000001962	5.23851	-2.48722	3.927	-0.633363	0.526497	0.830955	Fam50a	family with sequence similarity 50, member A [Source:MGI Symbol;Acc:MGI:1351626]
ENSMUSG00000001964	13.2457	-1.25984	1.46771	-0.858372	0.390687	0.737609	Emd	emerin [Source:MGI Symbol;Acc:MGI:108117]
ENSMUSG00000001983	6.66305	-1.71708	1.75286	-0.979588	0.32729	0.684101	Taco1	translational activator of mitochondrially encoded cytochrome c oxidase I [Source:MGI Symbol;Acc:MGI:1917457]
ENSMUSG00000001985	1.80503	2.97922	5.08292	0.586123	0.557793	NA	Grik3	glutamate receptor, ionotropic, kainate 3 [Source:MGI Symbol;Acc:MGI:95816]
ENSMUSG00000001986	0.654081	-3.11313	6.12906	-0.50793	0.611503	NA	Gria3	glutamate receptor, ionotropic, AMPA3 (alpha 3) [Source:MGI Symbol;Acc:MGI:95810]
ENSMUSG00000001988	0.653398	-1.46903	6.11145	-0.240374	0.810041	NA	Npas1	neuronal PAS domain protein 1 [Source:MGI Symbol;Acc:MGI:109205]
ENSMUSG00000001995	14.9986	0.787385	1.83028	0.4302	0.66705	0.891948	Sipa1l2	signal-induced proliferation-associated 1 like 2 [Source:MGI Symbol;Acc:MGI:2676970]
ENSMUSG00000001998	10.3968	-1.4702	1.15449	-1.27347	0.202852	0.545808	Ap4e1	adaptor-related protein complex AP-4, epsilon 1 [Source:MGI Symbol;Acc:MGI:1336993]
ENSMUSG00000001999	3.79326	0.786215	2.21292	0.355283	0.722377	NA	Blvra	biliverdin reductase A [Source:MGI Symbol;Acc:MGI:88170]
ENSMUSG00000002006	0.870268	-0.487123	6.11582	-0.0796497	0.936516	NA	Pdzd4	PDZ domain containing 4 [Source:MGI Symbol;Acc:MGI:2443483]
ENSMUSG00000002007	0	NA	NA	NA	NA	NA	Srpk3	serine/arginine-rich protein specific kinase 3 [Source:MGI Symbol;Acc:MGI:1891338]
ENSMUSG00000002010	5.77648	1.32651	2.59275	0.511623	0.608915	0.869156	Idh3g	isocitrate dehydrogenase 3 (NAD+), gamma [Source:MGI Symbol;Acc:MGI:1099463]
ENSMUSG00000002012	0	NA	NA	NA	NA	NA	Pnck	pregnancy upregulated non-ubiquitously expressed CaM kinase [Source:MGI Symbol;Acc:MGI:1347357]
ENSMUSG00000002014	1.55134	-3.41535	5.11326	-0.667941	0.504171	NA	Ssr4	signal sequence receptor, delta [Source:MGI Symbol;Acc:MGI:1099464]
ENSMUSG00000002015	27.2049	-1.20439	0.66444	-1.81264	0.0698875	0.307342	Bcap31	B cell receptor associated protein 31 [Source:MGI Symbol;Acc:MGI:1350933]
ENSMUSG00000002017	59.3093	0.156597	1.77306	0.0883203	0.929622	0.97738	Fam98a	family with sequence similarity 98, member A [Source:MGI Symbol;Acc:MGI:1919972]
ENSMUSG00000002020	2.0593	8.02275	3.9115	2.05107	0.0402601	NA	Ltbp2	latent transforming growth factor beta binding protein 2 [Source:MGI Symbol;Acc:MGI:99502]
ENSMUSG00000002028	9.4035	-3.40405	2.5304	-1.34526	0.178541	0.517027	Kmt2a	lysine (K)-specific methyltransferase 2A [Source:MGI Symbol;Acc:MGI:96995]
ENSMUSG00000002031	45.3872	0.348276	1.73088	0.201214	0.840531	0.951877	Ift46	intraflagellar transport 46 [Source:MGI Symbol;Acc:MGI:1923818]
ENSMUSG00000002032	0.0877691	-0.0247755	6.18839	-0.00400355	0.996806	NA	Tmem25	transmembrane protein 25 [Source:MGI Symbol;Acc:MGI:1918937]
ENSMUSG00000002033	0	NA	NA	NA	NA	NA	Cd3g	CD3 antigen, gamma polypeptide [Source:MGI Symbol;Acc:MGI:88333]
ENSMUSG00000002043	10.6279	-0.943671	2.01649	-0.467977	0.639801	0.879588	Trappc6a	trafficking protein particle complex 6A [Source:MGI Symbol;Acc:MGI:1914341]
ENSMUSG00000002052	129.793	0.41269	0.381064	1.08299	0.278811	0.636089	Supt6	SPT6, histone chaperone and transcription elongation factor [Source:MGI Symbol;Acc:MGI:107726]
ENSMUSG00000002055	266.841	-0.750979	0.368197	-2.03961	0.0413891	0.219357	Spag5	sperm associated antigen 5 [Source:MGI Symbol;Acc:MGI:1927470]
ENSMUSG00000002057	0.986894	6.53891	6.12041	1.06838	0.285351	NA	Foxn1	forkhead box N1 [Source:MGI Symbol;Acc:MGI:102949]
ENSMUSG00000002058	10.2408	3.69928	2.19672	1.684	0.0921809	0.359628	Unc119	unc-119 lipid binding chaperone [Source:MGI Symbol;Acc:MGI:1328357]
ENSMUSG00000002059	1.24002	-0.624863	4.50622	-0.138667	0.889714	NA	Rab34	RAB34, member RAS oncogene family [Source:MGI Symbol;Acc:MGI:104606]
ENSMUSG00000002064	17.4808	0.68878	1.11489	0.617801	0.536706	0.837075	Sdf2	stromal cell derived factor 2 [Source:MGI Symbol;Acc:MGI:108019]
ENSMUSG00000002068	19.6769	-1.08959	0.966708	-1.12712	0.259694	0.614984	Ccne1	cyclin E1 [Source:MGI Symbol;Acc:MGI:88316]
ENSMUSG00000002076	18.8792	-0.639855	1.82638	-0.35034	0.726083	0.916529	Hsf2bp	heat shock transcription factor 2 binding protein [Source:MGI Symbol;Acc:MGI:1921627]
ENSMUSG00000002083	2.49652	6.54459	2.87747	2.27443	0.0229403	NA	Bbc3	BCL2 binding component 3 [Source:MGI Symbol;Acc:MGI:2181667]
ENSMUSG00000002100	0	NA	NA	NA	NA	NA	Mybpc3	myosin binding protein C, cardiac [Source:MGI Symbol;Acc:MGI:102844]
ENSMUSG00000002102	1344.43	-3.72338	0.177876	-20.9324	2.71e-97	6.41e-94	Psmc3	proteasome (prosome, macropain) 26S subunit, ATPase 3 [Source:MGI Symbol;Acc:MGI:1098754]
ENSMUSG00000002103	8.04711	-2.06422	2.19499	-0.940426	0.346999	0.700444	Acp2	acid phosphatase 2, lysosomal [Source:MGI Symbol;Acc:MGI:87882]
ENSMUSG00000002104	2.09141	-3.25564	4.80386	-0.677714	0.497953	NA	Rapsn	receptor-associated protein of the synapse [Source:MGI Symbol;Acc:MGI:99422]
ENSMUSG00000002105	44.7918	0.119075	0.722567	0.164795	0.869105	0.962111	Slc39a13	solute carrier family 39 (metal ion transporter), member 13 [Source:MGI Symbol;Acc:MGI:1915677]
ENSMUSG00000002107	3.71804	0.435239	2.36768	0.183825	0.854151	NA	Celf2	CUGBP, Elav-like family member 2 [Source:MGI Symbol;Acc:MGI:1338822]
ENSMUSG00000002108	5.19812	0.730514	2.51914	0.289985	0.771828	0.930608	Nr1h3	nuclear receptor subfamily 1, group H, member 3 [Source:MGI Symbol;Acc:MGI:1352462]
ENSMUSG00000002109	16.386	-4.00745	2.01337	-1.99043	0.046544	0.236362	Ddb2	damage specific DNA binding protein 2 [Source:MGI Symbol;Acc:MGI:1355314]
ENSMUSG00000002111	0.455573	16.7661	6.1274	2.73625	0.00621447	NA	Spi1	spleen focus forming virus (SFFV) proviral integration oncogene [Source:MGI Symbol;Acc:MGI:98282]
ENSMUSG00000002129	86.4004	-0.978699	0.513893	-1.90448	0.0568477	0.271512	Sf3a1	splicing factor 3a, subunit 1 [Source:MGI Symbol;Acc:MGI:1914715]
ENSMUSG00000002147	6.60419	3.49658	1.52558	2.29196	0.0219077	0.141584	Stat6	signal transducer and activator of transcription 6 [Source:MGI Symbol;Acc:MGI:103034]
ENSMUSG00000002190	934.418	-0.996816	0.24131	-4.13085	3.61e-05	0.000720939	Clgn	calmegin [Source:MGI Symbol;Acc:MGI:107472]
ENSMUSG00000002204	0	NA	NA	NA	NA	NA	Napsa	napsin A aspartic peptidase [Source:MGI Symbol;Acc:MGI:109365]
ENSMUSG00000002205	74.9855	-1.58263	1.65674	-0.955272	0.33944	0.694977	Vrk3	vaccinia related kinase 3 [Source:MGI Symbol;Acc:MGI:2182465]
ENSMUSG00000002210	64.6501	1.42361	1.72672	0.824458	0.409679	0.755366	Smg9	SMG9 nonsense mediated mRNA decay factor [Source:MGI Symbol;Acc:MGI:1919247]
ENSMUSG00000002221	35.5403	1.90632	0.821346	2.32097	0.0202882	0.134425	Paxip1	PAX interacting (with transcription-activation domain) protein 1 [Source:MGI Symbol;Acc:MGI:1890430]
ENSMUSG00000002222	20.7193	1.31819	0.935981	1.40835	0.159028	0.486539	Rmnd5a	required for meiotic nuclear division 5 homolog A [Source:MGI Symbol;Acc:MGI:1915727]
ENSMUSG00000002227	5.26828	1.83512	2.14713	0.854686	0.392725	0.739536	Mov10	Mov10 RISC complex RNA helicase [Source:MGI Symbol;Acc:MGI:97054]
ENSMUSG00000002228	360.423	1.45087	0.271734	5.33931	9.33e-08	3.1e-06	Ppm1j	protein phosphatase 1J [Source:MGI Symbol;Acc:MGI:1919137]
ENSMUSG00000002233	0.293253	4.0473	6.21	0.651738	0.51457	NA	Rhoc	ras homolog family member C [Source:MGI Symbol;Acc:MGI:106028]
ENSMUSG00000002240	102.586	-1.58312	1.70768	-0.927059	0.353896	0.706223	Prr27	proline rich 27 [Source:MGI Symbol;Acc:MGI:1921029]
ENSMUSG00000002249	1.91517	2.24796	4.25115	0.528789	0.596952	NA	Tead3	TEA domain family member 3 [Source:MGI Symbol;Acc:MGI:109241]
ENSMUSG00000002250	0.686341	2.71187	6.15654	0.440485	0.659586	NA	Ppard	peroxisome proliferator activator receptor delta [Source:MGI Symbol;Acc:MGI:101884]
ENSMUSG00000002257	0.404986	-12.6722	6.13419	-2.06582	0.0388453	NA	Def6	differentially expressed in FDCP 6 [Source:MGI Symbol;Acc:MGI:1346328]
ENSMUSG00000002265	3.34956	-0.676126	2.68685	-0.251642	0.801318	NA	Peg3	paternally expressed 3 [Source:MGI Symbol;Acc:MGI:104748]
ENSMUSG00000002266	0	NA	NA	NA	NA	NA	Zim1	zinc finger, imprinted 1 [Source:MGI Symbol;Acc:MGI:1341879]
ENSMUSG00000002274	3.70815	-0.828218	2.42327	-0.341776	0.732519	NA	Metrn	meteorin, glial cell differentiation regulator [Source:MGI Symbol;Acc:MGI:1917333]
ENSMUSG00000002279	65.9084	-0.625422	1.71026	-0.365687	0.714598	0.910493	Lmf1	lipase maturation factor 1 [Source:MGI Symbol;Acc:MGI:1923733]
ENSMUSG00000002280	69.1206	0.0209383	0.408507	0.0512557	0.959122	0.985492	Ciao3	cytosolic iron-sulfur assembly component 3 [Source:MGI Symbol;Acc:MGI:1914813]
ENSMUSG00000002289	1.62277	-1.65313	3.83847	-0.430676	0.666704	NA	Angptl4	angiopoietin-like 4 [Source:MGI Symbol;Acc:MGI:1888999]
ENSMUSG00000002297	21.3146	0.0987643	1.796	0.0549913	0.956145	0.984574	Dbf4	DBF4 zinc finger [Source:MGI Symbol;Acc:MGI:1351328]
ENSMUSG00000002307	68.0868	-0.526043	1.71121	-0.30741	0.758531	0.927302	Daxx	Fas death domain-associated protein [Source:MGI Symbol;Acc:MGI:1197015]
ENSMUSG00000002308	89.8714	-1.53998	1.70554	-0.902929	0.366563	0.717521	Cd320	CD320 antigen [Source:MGI Symbol;Acc:MGI:1860083]
ENSMUSG00000002319	356.144	5.20031	1.39776	3.72046	0.000198858	0.00319762	Ipo4	importin 4 [Source:MGI Symbol;Acc:MGI:1923001]
ENSMUSG00000002320	2.42912	-0.386199	2.72478	-0.141736	0.887289	NA	Tm9sf1	transmembrane 9 superfamily member 1 [Source:MGI Symbol;Acc:MGI:1921390]
ENSMUSG00000002324	193.096	-0.509768	0.324381	-1.57151	0.116065	0.412243	Rec8	REC8 meiotic recombination protein [Source:MGI Symbol;Acc:MGI:1929645]
ENSMUSG00000002325	0	NA	NA	NA	NA	NA	Irf9	interferon regulatory factor 9 [Source:MGI Symbol;Acc:MGI:107587]
ENSMUSG00000002326	85.4054	-2.3855	0.667244	-3.57515	0.000350028	0.00526992	Gmpr2	guanosine monophosphate reductase 2 [Source:MGI Symbol;Acc:MGI:1917903]
ENSMUSG00000002329	0.919748	2.49278	6.05022	0.412015	0.680328	NA	Mdp1	magnesium-dependent phosphatase 1 [Source:MGI Symbol;Acc:MGI:1915131]
ENSMUSG00000002332	57.5651	0.57692	1.7242	0.334602	0.737925	0.920743	Dhrs1	dehydrogenase/reductase 1 [Source:MGI Symbol;Acc:MGI:1196314]
ENSMUSG00000002341	95.3939	1.26293	0.513021	2.46175	0.0138262	0.101496	Ncan	neurocan [Source:MGI Symbol;Acc:MGI:104694]
ENSMUSG00000002342	2.2528	1.76495	5.32065	0.331716	0.740103	NA	Tmem161a	transmembrane protein 161A [Source:MGI Symbol;Acc:MGI:2384577]
ENSMUSG00000002343	1.32448	-0.110215	6.08496	-0.0181126	0.985549	NA	Armc6	armadillo repeat containing 6 [Source:MGI Symbol;Acc:MGI:1924063]
ENSMUSG00000002345	14.1968	-0.716583	1.30847	-0.54765	0.583932	0.85851	Borcs8	BLOC-1 related complex subunit 8 [Source:MGI Symbol;Acc:MGI:1919618]
ENSMUSG00000002346	0.698147	-1.83083	6.11482	-0.299409	0.764628	NA	Slc25a42	solute carrier family 25, member 42 [Source:MGI Symbol;Acc:MGI:1920345]
ENSMUSG00000002365	10.1413	-1.77953	1.43948	-1.23623	0.216374	0.564025	Snx9	sorting nexin 9 [Source:MGI Symbol;Acc:MGI:1913866]
ENSMUSG00000002372	37.701	-0.134687	1.75766	-0.0766284	0.938919	0.980071	Ranbp3	RAN binding protein 3 [Source:MGI Symbol;Acc:MGI:1919060]
ENSMUSG00000002379	8.90752	-0.285355	2.07169	-0.13774	0.890446	0.966498	Ndufa11	NADH:ubiquinone oxidoreductase subunit A11 [Source:MGI Symbol;Acc:MGI:1917125]
ENSMUSG00000002384	11.4426	1.87425	1.97807	0.947517	0.343375	0.698047	Bmp8b	bone morphogenetic protein 8b [Source:MGI Symbol;Acc:MGI:107335]
ENSMUSG00000002393	1.15559	2.52215	6.08214	0.414681	0.678376	NA	Nr2f6	nuclear receptor subfamily 2, group F, member 6 [Source:MGI Symbol;Acc:MGI:1352453]
ENSMUSG00000002395	40.6842	1.08954	1.74753	0.62347	0.532976	0.834727	Use1	unconventional SNARE in the ER 1 homolog (S. cerevisiae) [Source:MGI Symbol;Acc:MGI:1914273]
ENSMUSG00000002396	14.4964	0.179655	1.75728	0.102235	0.91857	0.975188	Ocel1	occludin/ELL domain containing 1 [Source:MGI Symbol;Acc:MGI:1924340]
ENSMUSG00000002409	365.232	4.47691	1.68382	2.65879	0.00784218	0.0666198	Dyrk1b	dual-specificity tyrosine phosphorylation regulated kinase 1b [Source:MGI Symbol;Acc:MGI:1330302]
ENSMUSG00000002413	56.0148	2.17949	0.597738	3.64623	0.000266118	0.00413839	Braf	Braf transforming gene [Source:MGI Symbol;Acc:MGI:88190]
ENSMUSG00000002416	20.5919	-1.12165	1.83613	-0.610878	0.54128	0.839392	Ndufb2	NADH:ubiquinone oxidoreductase subunit B2 [Source:MGI Symbol;Acc:MGI:1915448]
ENSMUSG00000002428	3.26131	-0.563371	2.66995	-0.211004	0.832884	NA	Hltf	helicase-like transcription factor [Source:MGI Symbol;Acc:MGI:1196437]
ENSMUSG00000002455	76.3549	-1.63384	1.70706	-0.957105	0.338514	0.694737	Prpf6	pre-mRNA splicing factor 6 [Source:MGI Symbol;Acc:MGI:1922946]
ENSMUSG00000002458	1.21667	-1.0234	4.94415	-0.206992	0.836016	NA	Rgs19	regulator of G-protein signaling 19 [Source:MGI Symbol;Acc:MGI:1915153]
ENSMUSG00000002459	0	NA	NA	NA	NA	NA	Rgs20	regulator of G-protein signaling 20 [Source:MGI Symbol;Acc:MGI:1929866]
ENSMUSG00000002475	1.28912	11.6259	6.0896	1.90914	0.0562442	NA	Abhd3	abhydrolase domain containing 3 [Source:MGI Symbol;Acc:MGI:2147183]
ENSMUSG00000002477	9.52131	-0.805998	1.94826	-0.413701	0.679093	0.896638	Snrpd1	small nuclear ribonucleoprotein D1 [Source:MGI Symbol;Acc:MGI:98344]
ENSMUSG00000002486	28.5169	1.39148	1.85023	0.752058	0.452016	0.784254	Tchp	trichoplein, keratin filament binding [Source:MGI Symbol;Acc:MGI:1925082]
ENSMUSG00000002489	12.3715	0.30639	1.90387	0.16093	0.872148	0.962229	Tiam1	T cell lymphoma invasion and metastasis 1 [Source:MGI Symbol;Acc:MGI:103306]
ENSMUSG00000002496	34.0867	2.02642	1.81528	1.11631	0.264289	0.620037	Tsc2	TSC complex subunit 2 [Source:MGI Symbol;Acc:MGI:102548]
ENSMUSG00000002500	0	NA	NA	NA	NA	NA	Rpl3l	ribosomal protein L3-like [Source:MGI Symbol;Acc:MGI:1913461]
ENSMUSG00000002504	0	NA	NA	NA	NA	NA	Nherf2	NHERF family PDZ scaffold protein 2 [Source:MGI Symbol;Acc:MGI:1890662]
ENSMUSG00000002524	91.7187	-1.18252	1.71646	-0.688931	0.490867	0.810539	Puf60	poly-U binding splicing factor 60 [Source:MGI Symbol;Acc:MGI:1915209]
ENSMUSG00000002546	36.3348	-0.51785	1.76514	-0.293377	0.769234	0.929828	Golga2	golgin A2 [Source:MGI Symbol;Acc:MGI:2139395]
ENSMUSG00000002550	1.35432	1.49336	5.64444	0.264571	0.79134	NA	Uck1	uridine-cytidine kinase 1 [Source:MGI Symbol;Acc:MGI:98904]
ENSMUSG00000002565	1.45579	3.41699	5.33319	0.640703	0.521715	NA	Scin	scinderin [Source:MGI Symbol;Acc:MGI:1306794]
ENSMUSG00000002578	0	NA	NA	NA	NA	NA	Ikzf4	IKAROS family zinc finger 4 [Source:MGI Symbol;Acc:MGI:1343139]
ENSMUSG00000002580	14.7387	1.75058	1.3763	1.27195	0.203391	0.546945	Mien1	migration and invasion enhancer 1 [Source:MGI Symbol;Acc:MGI:1913678]
ENSMUSG00000002588	0.232528	0.81631	6.21592	0.131326	0.895518	NA	Pon1	paraoxonase 1 [Source:MGI Symbol;Acc:MGI:103295]
ENSMUSG00000002602	5.95805	11.3514	2.43535	4.66111	3.15e-06	7.89e-05	Axl	AXL receptor tyrosine kinase [Source:MGI Symbol;Acc:MGI:1347244]
ENSMUSG00000002603	3.6372	-2.5411	1.81184	-1.4025	0.160765	NA	Tgfb1	transforming growth factor, beta 1 [Source:MGI Symbol;Acc:MGI:98725]
ENSMUSG00000002608	56.2677	-0.0962094	0.457828	-0.210143	0.833556	0.950096	Ccdc97	coiled-coil domain containing 97 [Source:MGI Symbol;Acc:MGI:1196455]
ENSMUSG00000002617	0.219423	-1.25433	6.14989	-0.20396	0.838384	NA	Zfp40	zinc finger protein 40 [Source:MGI Symbol;Acc:MGI:99185]
ENSMUSG00000002625	63.4628	-2.19351	1.77662	-1.23465	0.216961	0.564248	Akap8l	A kinase anchor protein 8-like [Source:MGI Symbol;Acc:MGI:1860606]
ENSMUSG00000002633	0	NA	NA	NA	NA	NA	Shh	sonic hedgehog [Source:MGI Symbol;Acc:MGI:98297]
ENSMUSG00000002635	46.8763	-2.4686	1.69814	-1.45371	0.146028	0.46332	Pdcd2l	programmed cell death 2-like [Source:MGI Symbol;Acc:MGI:1915329]
ENSMUSG00000002658	435.66	-0.637592	0.157945	-4.0368	5.42e-05	0.00104554	Gtf2f1	general transcription factor IIF, polypeptide 1 [Source:MGI Symbol;Acc:MGI:1923848]
ENSMUSG00000002660	9.0937	-1.89077	1.26224	-1.49795	0.134146	0.442086	Clpp	caseinolytic mitochondrial matrix peptidase proteolytic subunit [Source:MGI Symbol;Acc:MGI:1858213]
ENSMUSG00000002661	8.62478	-0.396404	2.10221	-0.188566	0.850433	0.955992	Alkbh7	alkB homolog 7 [Source:MGI Symbol;Acc:MGI:1913650]
ENSMUSG00000002664	1.98409	2.56619	3.75751	0.682948	0.494639	NA	Pspn	persephin [Source:MGI Symbol;Acc:MGI:1201684]
ENSMUSG00000002668	0	NA	NA	NA	NA	NA	Dennd1c	DENN domain containing 1C [Source:MGI Symbol;Acc:MGI:1918035]
ENSMUSG00000002679	6.79231	-0.921939	2.38592	-0.386407	0.699195	0.905105	Med6	mediator complex subunit 6 [Source:MGI Symbol;Acc:MGI:1917042]
ENSMUSG00000002688	28.8402	1.54929	2.03586	0.761003	0.446656	0.78112	Prkd1	protein kinase D1 [Source:MGI Symbol;Acc:MGI:99879]
ENSMUSG00000002699	22.4674	2.14183	1.83866	1.16489	0.244064	0.597212	Lcp2	lymphocyte cytosolic protein 2 [Source:MGI Symbol;Acc:MGI:1321402]
ENSMUSG00000002718	96.3888	-0.00472248	1.70498	-0.00276981	0.99779	0.99916	Cse1l	chromosome segregation 1 like [Source:MGI Symbol;Acc:MGI:1339951]
ENSMUSG00000002728	2.10499	-1.82161	2.98641	-0.609966	0.541884	NA	Naa20	N(alpha)-acetyltransferase 20, NatB catalytic subunit [Source:MGI Symbol;Acc:MGI:1915127]
ENSMUSG00000002731	16.5165	-0.327698	1.12915	-0.290218	0.77165	0.930608	Prkra	protein kinase, interferon inducible double stranded RNA dependent activator [Source:MGI Symbol;Acc:MGI:1344375]
ENSMUSG00000002732	7.86544	-1.70445	1.89886	-0.897618	0.369389	0.720415	Fkbp7	FK506 binding protein 7 [Source:MGI Symbol;Acc:MGI:1336879]
ENSMUSG00000002733	57.8963	2.49731	1.11891	2.23191	0.0256207	0.158339	Plekha3	pleckstrin homology domain-containing, family A (phosphoinositide binding specific) member 3 [Source:MGI Symbol;Acc:MGI:1932515]
ENSMUSG00000002741	31.6673	-0.559275	0.830669	-0.673283	0.500767	0.815468	Ykt6	YKT6 v-SNARE homolog (S. cerevisiae) [Source:MGI Symbol;Acc:MGI:1927550]
ENSMUSG00000002748	45.5756	-1.49679	0.513944	-2.91236	0.00358704	0.0356629	Baz1b	bromodomain adjacent to zinc finger domain, 1B [Source:MGI Symbol;Acc:MGI:1353499]
ENSMUSG00000002763	65.8921	1.65396	1.7261	0.958204	0.33796	0.694419	Pex6	peroxisomal biogenesis factor 6 [Source:MGI Symbol;Acc:MGI:2385054]
ENSMUSG00000002767	14.0972	-0.194317	2.00487	-0.0969228	0.922788	0.97528	Mrpl2	mitochondrial ribosomal protein L2 [Source:MGI Symbol;Acc:MGI:1351622]
ENSMUSG00000002768	965.7	2.44087	1.70291	1.43335	0.151757	0.474805	Mea1	male enhanced antigen 1 [Source:MGI Symbol;Acc:MGI:96957]
ENSMUSG00000002769	0.27599	3.91365	6.20875	0.630343	0.52847	NA	Gnmt	glycine N-methyltransferase [Source:MGI Symbol;Acc:MGI:1202304]
ENSMUSG00000002771	32.8955	1.89474	0.849576	2.23022	0.0257331	0.15892	Grin2d	glutamate receptor, ionotropic, NMDA2D (epsilon 4) [Source:MGI Symbol;Acc:MGI:95823]
ENSMUSG00000002778	5.95059	2.15703	2.32412	0.928106	0.353352	0.706223	Kdelr1	KDEL (Lys-Asp-Glu-Leu) endoplasmic reticulum protein retention receptor 1 [Source:MGI Symbol;Acc:MGI:1915387]
ENSMUSG00000002781	1.64213	1.2816	4.3484	0.294728	0.768201	NA	Tmem143	transmembrane protein 143 [Source:MGI Symbol;Acc:MGI:1917459]
ENSMUSG00000002797	5.07247	0.0515967	2.47885	0.0208148	0.983393	0.99465	Ggct	gamma-glutamyl cyclotransferase [Source:MGI Symbol;Acc:MGI:95700]
ENSMUSG00000002799	11.4444	-1.34675	1.25775	-1.07076	0.284277	0.641479	Jag2	jagged 2 [Source:MGI Symbol;Acc:MGI:1098270]
ENSMUSG00000002803	1.52994	2.30902	4.26634	0.541218	0.588357	NA	Btbd6	BTB domain containing 6 [Source:MGI Symbol;Acc:MGI:3026623]
ENSMUSG00000002804	2.90385	-0.758785	3.37963	-0.224517	0.822355	NA	Nudt14	nudix hydrolase 14 [Source:MGI Symbol;Acc:MGI:1913424]
ENSMUSG00000002808	0	NA	NA	NA	NA	NA	Epdr1	ependymin related 1 [Source:MGI Symbol;Acc:MGI:2145369]
ENSMUSG00000002812	37.9407	-0.933212	0.534692	-1.74532	0.0809284	0.335057	Flii	flightless I actin binding protein [Source:MGI Symbol;Acc:MGI:1342286]
ENSMUSG00000002814	13.1304	-0.613448	1.86485	-0.328953	0.742191	0.921681	Top3a	topoisomerase (DNA) III alpha [Source:MGI Symbol;Acc:MGI:1197527]
ENSMUSG00000002820	71.2379	1.45771	1.04101	1.40028	0.161428	0.48882	Atg4d	autophagy related 4D, cysteine peptidase [Source:MGI Symbol;Acc:MGI:2444308]
ENSMUSG00000002825	9.53364	-3.12048	2.22024	-1.40547	0.159882	0.486967	Qtrt1	queuine tRNA-ribosyltransferase catalytic subunit 1 [Source:MGI Symbol;Acc:MGI:1931441]
ENSMUSG00000002831	0.644461	4.83567	6.17686	0.782868	0.433705	NA	Plin4	perilipin 4 [Source:MGI Symbol;Acc:MGI:1929709]
ENSMUSG00000002833	89.2927	-0.418563	1.71961	-0.243405	0.807691	0.941062	Hdgfl2	HDGF like 2 [Source:MGI Symbol;Acc:MGI:1194492]
ENSMUSG00000002835	2791.54	-1.59599	0.155287	-10.2777	8.88e-25	1.4e-22	Chaf1a	chromatin assembly factor 1, subunit A [Source:MGI Symbol;Acc:MGI:1351331]
ENSMUSG00000002844	21.9554	0.749843	0.785272	0.954883	0.339637	0.69514	Adprh	ADP-ribosylarginine hydrolase [Source:MGI Symbol;Acc:MGI:1098234]
ENSMUSG00000002845	2.60861	-0.0457374	4.86414	-0.00940298	0.992498	NA	Tmem39a	transmembrane protein 39a [Source:MGI Symbol;Acc:MGI:1915096]
ENSMUSG00000002846	5.82857	1.53002	1.48604	1.02959	0.303201	0.66207	Timmdc1	translocase of inner mitochondrial membrane domain containing 1 [Source:MGI Symbol;Acc:MGI:1922139]
ENSMUSG00000002847	4.39519	-2.69733	1.60914	-1.67626	0.0936877	NA	Pla1a	phospholipase A1 member A [Source:MGI Symbol;Acc:MGI:1934677]
ENSMUSG00000002870	20.3574	-0.937193	1.11674	-0.839219	0.401346	0.747451	Mcm2	minichromosome maintenance complex component 2 [Source:MGI Symbol;Acc:MGI:105380]
ENSMUSG00000002871	0.474498	-1.23891	6.11537	-0.202589	0.839456	NA	Tpra1	transmembrane protein, adipocyte asscociated 1 [Source:MGI Symbol;Acc:MGI:1345190]
ENSMUSG00000002881	1.1019	6.53192	6.13628	1.06448	0.287113	NA	Nab1	Ngfi-A binding protein 1 [Source:MGI Symbol;Acc:MGI:107564]
ENSMUSG00000002885	2.80204	11.8801	5.14056	2.31105	0.0208301	NA	Adgre5	adhesion G protein-coupled receptor E5 [Source:MGI Symbol;Acc:MGI:1347095]
ENSMUSG00000002897	3.6734	-2.47715	1.85776	-1.33341	0.182399	NA	Il17ra	interleukin 17 receptor A [Source:MGI Symbol;Acc:MGI:107399]
ENSMUSG00000002900	8.47885	-3.10432	1.9489	-1.59285	0.111193	0.401617	Lamb1	laminin B1 [Source:MGI Symbol;Acc:MGI:96743]
ENSMUSG00000002908	0.209177	-0.901321	6.16194	-0.146272	0.883706	NA	Kcnn1	potassium intermediate/small conductance calcium-activated channel, subfamily N, member 1 [Source:MGI Symbol;Acc:MGI:1933993]
ENSMUSG00000002910	2.29142	-0.23223	2.43549	-0.0953523	0.924035	NA	Arrdc2	arrestin domain containing 2 [Source:MGI Symbol;Acc:MGI:1918057]
ENSMUSG00000002930	0.205175	1.76392	6.203	0.284366	0.77613	NA	Ppp1r17	protein phosphatase 1, regulatory subunit 17 [Source:MGI Symbol;Acc:MGI:1333876]
ENSMUSG00000002944	1.16477	-0.763069	4.44254	-0.171764	0.863623	NA	Cd36	CD36 molecule [Source:MGI Symbol;Acc:MGI:107899]
ENSMUSG00000002948	0.325176	-2.09621	6.13705	-0.341567	0.732677	NA	Map2k7	mitogen-activated protein kinase kinase 7 [Source:MGI Symbol;Acc:MGI:1346871]
ENSMUSG00000002949	22.444	-0.0394047	1.80876	-0.0217855	0.982619	0.994477	Timm44	translocase of inner mitochondrial membrane 44 [Source:MGI Symbol;Acc:MGI:1343262]
ENSMUSG00000002957	241.376	-0.877287	0.254053	-3.45316	0.000554055	0.0078422	Ap2a2	adaptor-related protein complex 2, alpha 2 subunit [Source:MGI Symbol;Acc:MGI:101920]
ENSMUSG00000002963	11.9395	0.727976	1.99585	0.364744	0.715302	0.910493	Pnkp	polynucleotide kinase 3'- phosphatase [Source:MGI Symbol;Acc:MGI:1891698]
ENSMUSG00000002968	71.2893	0.950602	1.29272	0.73535	0.462127	0.790414	Med25	mediator complex subunit 25 [Source:MGI Symbol;Acc:MGI:1922863]
ENSMUSG00000002980	4.03135	-1.46901	1.96079	-0.749191	0.453742	NA	Bcam	basal cell adhesion molecule [Source:MGI Symbol;Acc:MGI:1929940]
ENSMUSG00000002981	22.3226	1.39587	1.78337	0.782712	0.433796	0.771982	Clptm1	cleft lip and palate associated transmembrane protein 1 [Source:MGI Symbol;Acc:MGI:1927155]
ENSMUSG00000002983	1.85216	-1.06571	4.93004	-0.216167	0.828858	NA	Relb	avian reticuloendotheliosis viral (v-rel) oncogene related B [Source:MGI Symbol;Acc:MGI:103289]
ENSMUSG00000002984	4.76106	-1.24633	2.30581	-0.540517	0.588841	0.860491	Tomm40	translocase of outer mitochondrial membrane 40 [Source:MGI Symbol;Acc:MGI:1858259]
ENSMUSG00000002985	58.8219	0.833195	1.74136	0.478474	0.632313	0.878577	Apoe	apolipoprotein E [Source:MGI Symbol;Acc:MGI:88057]
ENSMUSG00000002992	0	NA	NA	NA	NA	NA	Apoc2	apolipoprotein C2 [Source:MGI Symbol;Acc:MGI:88054]
ENSMUSG00000002996	36.6032	0.0764826	0.782704	0.0977159	0.922158	0.97528	Hbp1	high mobility group box transcription factor 1 [Source:MGI Symbol;Acc:MGI:894659]
ENSMUSG00000002997	2.11926	-0.799318	3.78048	-0.211433	0.832549	NA	Prkar2b	protein kinase, cAMP dependent regulatory, type II beta [Source:MGI Symbol;Acc:MGI:97760]
ENSMUSG00000003031	7.92861	3.50195	3.13079	1.11855	0.263332	0.619343	Cdkn1b	cyclin dependent kinase inhibitor 1B [Source:MGI Symbol;Acc:MGI:104565]
ENSMUSG00000003032	127.901	2.42658	0.36429	6.66113	2.72e-11	1.47e-09	Klf4	Kruppel-like transcription factor 4 (gut) [Source:MGI Symbol;Acc:MGI:1342287]
ENSMUSG00000003033	165.397	-0.620982	0.36709	-1.69163	0.0907163	0.356938	Ap1m1	adaptor-related protein complex AP-1, mu subunit 1 [Source:MGI Symbol;Acc:MGI:102776]
ENSMUSG00000003037	47.226	-1.12073	0.500206	-2.24054	0.0250556	0.156061	Rab8a	RAB8A, member RAS oncogene family [Source:MGI Symbol;Acc:MGI:96960]
ENSMUSG00000003038	0.97262	0.505944	4.86356	0.104028	0.917148	NA	Hmgn2	high mobility group nucleosomal binding domain 2 [Source:MGI Symbol;Acc:MGI:96136]
ENSMUSG00000003039	19.7242	1.43522	1.53258	0.936469	0.349032	0.702927	Fam32a	family with sequence similarity 32, member A [Source:MGI Symbol;Acc:MGI:1915172]
ENSMUSG00000003051	0.1765	3.17449	6.23278	0.509321	0.610527	NA	Elf3	E74-like factor 3 [Source:MGI Symbol;Acc:MGI:1101781]
ENSMUSG00000003053	0.595957	-2.96307	6.13001	-0.483371	0.628832	NA	Cyp2c29	cytochrome P450, family 2, subfamily c, polypeptide 29 [Source:MGI Symbol;Acc:MGI:103238]
ENSMUSG00000003062	3.80335	2.78568	2.36676	1.177	0.239195	NA	Stard3nl	STARD3 N-terminal like [Source:MGI Symbol;Acc:MGI:1923455]
ENSMUSG00000003068	49.2393	0.570824	1.7328	0.329422	0.741837	0.921681	Stk11	serine/threonine kinase 11 [Source:MGI Symbol;Acc:MGI:1341870]
ENSMUSG00000003070	0.348791	0.527229	6.21009	0.0848989	0.932342	NA	Efna2	ephrin A2 [Source:MGI Symbol;Acc:MGI:102707]
ENSMUSG00000003072	36.0893	-0.68066	1.78477	-0.381371	0.702928	0.906397	Atp5f1d	ATP synthase F1 subunit delta [Source:MGI Symbol;Acc:MGI:1913293]
ENSMUSG00000003099	21.4546	1.04773	1.78681	0.586369	0.557628	0.845609	Ppp5c	protein phosphatase 5, catalytic subunit [Source:MGI Symbol;Acc:MGI:102666]
ENSMUSG00000003119	23.4598	-0.089254	1.19909	-0.0744346	0.940665	0.981103	Cdk12	cyclin dependent kinase 12 [Source:MGI Symbol;Acc:MGI:1098802]
ENSMUSG00000003123	446.016	3.16797	0.383737	8.25557	1.51e-16	1.42e-14	Lipe	lipase, hormone sensitive [Source:MGI Symbol;Acc:MGI:96790]
ENSMUSG00000003131	79.9786	1.83734	0.508839	3.61085	0.0003052	0.00467694	Pafah1b2	platelet-activating factor acetylhydrolase, isoform 1b, subunit 2 [Source:MGI Symbol;Acc:MGI:108415]
ENSMUSG00000003134	14.5207	4.50856	1.44394	3.1224	0.00179381	0.0210689	Tbc1d8	TBC1 domain family, member 8 [Source:MGI Symbol;Acc:MGI:1927225]
ENSMUSG00000003135	8.0242	-0.216586	2.11554	-0.102379	0.918456	0.975188	Cnot11	CCR4-NOT transcription complex, subunit 11 [Source:MGI Symbol;Acc:MGI:106580]
ENSMUSG00000003153	287.732	0.710582	1.68307	0.422195	0.672883	0.89487	Slc2a3	solute carrier family 2 (facilitated glucose transporter), member 3 [Source:MGI Symbol;Acc:MGI:95757]
ENSMUSG00000003154	7.0903	3.15707	2.16037	1.46136	0.143917	0.459089	Foxj2	forkhead box J2 [Source:MGI Symbol;Acc:MGI:1926805]
ENSMUSG00000003161	0.212023	-1.81713	6.13954	-0.295971	0.767252	NA	Sri	sorcin [Source:MGI Symbol;Acc:MGI:98419]
ENSMUSG00000003166	0.920659	5.30621	6.16158	0.861177	0.389141	NA	Dgcr2	DiGeorge syndrome critical region gene 2 [Source:MGI Symbol;Acc:MGI:892866]
ENSMUSG00000003184	8.6507	-0.516448	2.0515	-0.251741	0.801241	0.939218	Irf3	interferon regulatory factor 3 [Source:MGI Symbol;Acc:MGI:1859179]
ENSMUSG00000003190	8.43474	0.581876	2.63877	0.22051	0.825474	0.947332	Bcl2l12	BCL2 like 12 [Source:MGI Symbol;Acc:MGI:1922986]
ENSMUSG00000003198	0.116264	1.28586	6.22954	0.206413	0.836469	NA	Zfp959	zinc finger protein 959 [Source:MGI Symbol;Acc:MGI:2385058]
ENSMUSG00000003199	0.266226	-1.22385	6.15383	-0.198876	0.84236	NA	Mpnd	MPN domain containing [Source:MGI Symbol;Acc:MGI:1915297]
ENSMUSG00000003200	57.2012	0.150985	0.503564	0.299833	0.764304	0.928975	Sh3gl1	SH3-domain GRB2-like 1 [Source:MGI Symbol;Acc:MGI:700010]
ENSMUSG00000003206	0.403764	3.05268	6.20112	0.492279	0.622522	NA	Ebi3	Epstein-Barr virus induced gene 3 [Source:MGI Symbol;Acc:MGI:1354171]
ENSMUSG00000003208	0.977027	2.94111	6.05448	0.485774	0.627128	NA	Yju2	YJU2 splicing factor [Source:MGI Symbol;Acc:MGI:1920136]
ENSMUSG00000003226	405.56	-0.809325	0.171665	-4.71456	2.42e-06	6.22e-05	Ranbp2	RAN binding protein 2 [Source:MGI Symbol;Acc:MGI:894323]
ENSMUSG00000003227	20.0665	2.69621	1.89262	1.42459	0.154276	0.479252	Edar	ectodysplasin-A receptor [Source:MGI Symbol;Acc:MGI:1343498]
ENSMUSG00000003228	13.0215	0.76115	1.68034	0.452974	0.650567	0.884158	Grk5	G protein-coupled receptor kinase 5 [Source:MGI Symbol;Acc:MGI:109161]
ENSMUSG00000003233	1.51541	2.57954	5.47119	0.471477	0.6373	NA	Dvl3	dishevelled segment polarity protein 3 [Source:MGI Symbol;Acc:MGI:108100]
ENSMUSG00000003234	69.6853	-3.43339	1.3089	-2.62311	0.00871305	0.0722015	Abcf3	ATP-binding cassette, sub-family F member 3 [Source:MGI Symbol;Acc:MGI:1351656]
ENSMUSG00000003235	96.4137	-0.41303	0.412814	-1.00052	0.317058	0.674264	Eif2b5	eukaryotic translation initiation factor 2B, subunit 5 epsilon [Source:MGI Symbol;Acc:MGI:2446176]
ENSMUSG00000003269	80.3983	-0.641744	1.7028	-0.376877	0.706265	0.907795	Cyth2	cytohesin 2 [Source:MGI Symbol;Acc:MGI:1334255]
ENSMUSG00000003271	0	NA	NA	NA	NA	NA	Sult2b1	sulfotransferase family, cytosolic, 2B, member 1 [Source:MGI Symbol;Acc:MGI:1926342]
ENSMUSG00000003273	0	NA	NA	NA	NA	NA	Car11	carbonic anhydrase 11 [Source:MGI Symbol;Acc:MGI:1336193]
ENSMUSG00000003279	0.684256	5.16225	6.16256	0.837679	0.402211	NA	Dlgap1	DLG associated protein 1 [Source:MGI Symbol;Acc:MGI:1346065]
ENSMUSG00000003282	1.97064	2.09092	3.90642	0.535253	0.592475	NA	Plag1	pleiomorphic adenoma gene 1 [Source:MGI Symbol;Acc:MGI:1891916]
ENSMUSG00000003283	0	NA	NA	NA	NA	NA	Hck	hemopoietic cell kinase [Source:MGI Symbol;Acc:MGI:96052]
ENSMUSG00000003299	14.8801	3.19224	1.61503	1.97658	0.0480892	0.240573	Mrpl4	mitochondrial ribosomal protein L4 [Source:MGI Symbol;Acc:MGI:2137210]
ENSMUSG00000003308	9.33769	2.63713	2.04166	1.29166	0.196475	0.537831	Keap1	kelch-like ECH-associated protein 1 [Source:MGI Symbol;Acc:MGI:1858732]
ENSMUSG00000003309	0	NA	NA	NA	NA	NA	Ap1m2	adaptor protein complex AP-1, mu 2 subunit [Source:MGI Symbol;Acc:MGI:1336974]
ENSMUSG00000003316	89.139	-2.23639	1.72828	-1.294	0.195665	0.537365	Glg1	golgi apparatus protein 1 [Source:MGI Symbol;Acc:MGI:104967]
ENSMUSG00000003341	2225.51	2.71508	0.195468	13.8901	7.27e-44	2.29e-41	Atp8b3	ATPase, class I, type 8B, member 3 [Source:MGI Symbol;Acc:MGI:1914581]
ENSMUSG00000003344	4.23361	1.19068	2.36349	0.503781	0.614415	NA	Btbd2	BTB domain containing 2 [Source:MGI Symbol;Acc:MGI:1933831]
ENSMUSG00000003345	632.307	3.16889	0.595189	5.32418	1.01e-07	3.32e-06	Csnk1g2	casein kinase 1, gamma 2 [Source:MGI Symbol;Acc:MGI:1920014]
ENSMUSG00000003346	74.6296	2.14842	1.72563	1.245	0.21313	0.561153	Abhd17a	abhydrolase domain containing 17A [Source:MGI Symbol;Acc:MGI:106388]
ENSMUSG00000003348	6.66727	3.94774	2.43644	1.62029	0.10517	0.389062	Mob3a	MOB kinase activator 3A [Source:MGI Symbol;Acc:MGI:3050117]
ENSMUSG00000003352	0	NA	NA	NA	NA	NA	Cacnb3	calcium channel, voltage-dependent, beta 3 subunit [Source:MGI Symbol;Acc:MGI:103307]
ENSMUSG00000003354	364.765	-1.29763	0.255902	-5.07082	3.96e-07	1.17e-05	Ccdc65	coiled-coil domain containing 65 [Source:MGI Symbol;Acc:MGI:2146001]
ENSMUSG00000003355	0	NA	NA	NA	NA	NA	Fkbp11	FK506 binding protein 11 [Source:MGI Symbol;Acc:MGI:1913370]
ENSMUSG00000003360	32.7072	-1.14712	0.555566	-2.06477	0.0389445	0.210894	Ddx23	DEAD box helicase 23 [Source:MGI Symbol;Acc:MGI:1921601]
ENSMUSG00000003363	11.1292	0.794073	2.08875	0.380166	0.703822	0.906712	Pld3	phospholipase D family member 3 [Source:MGI Symbol;Acc:MGI:1333782]
ENSMUSG00000003378	26.8561	0.528176	1.76296	0.299596	0.764486	0.929028	Grik5	glutamate receptor, ionotropic, kainate 5 (gamma 2) [Source:MGI Symbol;Acc:MGI:95818]
ENSMUSG00000003379	2.49369	1.85193	3.44969	0.536841	0.591377	NA	Cd79a	CD79A antigen (immunoglobulin-associated alpha) [Source:MGI Symbol;Acc:MGI:101774]
ENSMUSG00000003380	64.8313	0.285227	1.47334	0.193592	0.846495	0.954408	Rabac1	Rab acceptor 1 (prenylated) [Source:MGI Symbol;Acc:MGI:1201692]
ENSMUSG00000003382	2.88347	0.424513	2.84036	0.149457	0.881193	NA	Etv3	ets variant 3 [Source:MGI Symbol;Acc:MGI:1350926]
ENSMUSG00000003402	60.0833	-1.39525	1.72607	-0.808341	0.418894	0.761597	Prkcsh	protein kinase C substrate 80K-H [Source:MGI Symbol;Acc:MGI:107877]
ENSMUSG00000003410	5.67213	-0.992666	2.22936	-0.44527	0.656124	0.885716	Elavl3	ELAV like RNA binding protein 3 [Source:MGI Symbol;Acc:MGI:109157]
ENSMUSG00000003411	0.981317	6.04805	6.14335	0.984486	0.324877	NA	Rab3b	RAB3B, member RAS oncogene family [Source:MGI Symbol;Acc:MGI:1917158]
ENSMUSG00000003418	0	NA	NA	NA	NA	NA	St8sia6	ST8 alpha-N-acetyl-neuraminide alpha-2,8-sialyltransferase 6 [Source:MGI Symbol;Acc:MGI:2386797]
ENSMUSG00000003420	0.447709	-0.380521	6.11905	-0.0621862	0.950415	NA	Fcgrt	Fc fragment of IgG receptor and transporter [Source:MGI Symbol;Acc:MGI:103017]
ENSMUSG00000003421	60.1122	-1.08363	0.876403	-1.23645	0.216291	0.564025	Nosip	nitric oxide synthase interacting protein [Source:MGI Symbol;Acc:MGI:1913644]
ENSMUSG00000003423	68.224	-0.0757756	1.71494	-0.0441856	0.964756	0.986884	Pih1d1	PIH1 domain containing 1 [Source:MGI Symbol;Acc:MGI:1916095]
ENSMUSG00000003429	12.5637	-3.1387	1.79265	-1.75088	0.0799671	0.33381	Rps11	ribosomal protein S11 [Source:MGI Symbol;Acc:MGI:1351329]
ENSMUSG00000003435	258.166	-1.71715	1.68687	-1.01795	0.308701	0.667198	Supt5	suppressor of Ty 5, DSIF elongation factor subunit [Source:MGI Symbol;Acc:MGI:1202400]
ENSMUSG00000003436	8.41123	-1.68341	1.30738	-1.28762	0.19788	0.540112	Dll3	delta like canonical Notch ligand 3 [Source:MGI Symbol;Acc:MGI:1096877]
ENSMUSG00000003437	71.3315	-1.51948	1.7204	-0.883217	0.377119	0.726332	Paf1	Paf1, RNA polymerase II complex component [Source:MGI Symbol;Acc:MGI:1923988]
ENSMUSG00000003438	5.25413	2.42186	2.50681	0.966115	0.333987	0.690798	Timm50	translocase of inner mitochondrial membrane 50 [Source:MGI Symbol;Acc:MGI:1913775]
ENSMUSG00000003444	47.8844	-1.11069	0.733463	-1.51431	0.129947	0.436712	Med29	mediator complex subunit 29 [Source:MGI Symbol;Acc:MGI:1914474]
ENSMUSG00000003452	3.70468	3.25471	3.31303	0.982395	0.325905	NA	Bicd1	BICD cargo adaptor 1 [Source:MGI Symbol;Acc:MGI:1101760]
ENSMUSG00000003458	37.9029	0.49313	1.74027	0.283363	0.776898	0.93147	Ncstn	nicastrin [Source:MGI Symbol;Acc:MGI:1891700]
ENSMUSG00000003464	13.0422	0.091675	1.91848	0.0477853	0.961887	0.986083	Pex19	peroxisomal biogenesis factor 19 [Source:MGI Symbol;Acc:MGI:1334458]
ENSMUSG00000003469	1.1974	4.59952	5.57903	0.82443	0.409695	NA	Phyhip	phytanoyl-CoA hydroxylase interacting protein [Source:MGI Symbol;Acc:MGI:1860417]
ENSMUSG00000003476	0.499015	3.01157	6.20968	0.48498	0.62769	NA	Crhr2	corticotropin releasing hormone receptor 2 [Source:MGI Symbol;Acc:MGI:894312]
ENSMUSG00000003477	3.03969	1.64499	2.65977	0.618472	0.536264	NA	Inmt	indolethylamine N-methyltransferase [Source:MGI Symbol;Acc:MGI:102963]
ENSMUSG00000003484	1.67496	4.79312	5.22911	0.916623	0.35934	NA	Cyp4f18	cytochrome P450, family 4, subfamily f, polypeptide 18 [Source:MGI Symbol;Acc:MGI:1919304]
ENSMUSG00000003500	1.89968	0.781827	5.46946	0.142944	0.886334	NA	Impdh1	inosine monophosphate dehydrogenase 1 [Source:MGI Symbol;Acc:MGI:96567]
ENSMUSG00000003505	0	NA	NA	NA	NA	NA	Psg18	pregnancy specific beta-1-glycoprotein 18 [Source:MGI Symbol;Acc:MGI:1347251]
ENSMUSG00000003518	34.7347	0.768097	1.58896	0.483396	0.628814	0.877054	Dusp3	dual specificity phosphatase 3 (vaccinia virus phosphatase VH1-related) [Source:MGI Symbol;Acc:MGI:1919599]
ENSMUSG00000003526	0.610426	1.55078	6.10673	0.253946	0.799537	NA	Prodh	proline dehydrogenase [Source:MGI Symbol;Acc:MGI:97770]
ENSMUSG00000003527	14.506	0.104039	1.87065	0.0556165	0.955647	0.984382	Ess2	ess-2 splicing factor [Source:MGI Symbol;Acc:MGI:107854]
ENSMUSG00000003528	6.57395	-0.254446	1.79313	-0.1419	0.887159	0.965035	Slc25a1	solute carrier family 25 (mitochondrial carrier, citrate transporter), member 1 [Source:MGI Symbol;Acc:MGI:1345283]
ENSMUSG00000003531	35.6415	1.27774	1.7355	0.736234	0.461589	0.790082	Dgcr6	DiGeorge syndrome critical region gene 6 [Source:MGI Symbol;Acc:MGI:1202877]
ENSMUSG00000003534	3.80098	5.75993	4.02167	1.43222	0.15208	NA	Ddr1	discoidin domain receptor family, member 1 [Source:MGI Symbol;Acc:MGI:99216]
ENSMUSG00000003541	4.65173	-2.08731	2.18571	-0.954982	0.339587	NA	Ier3	immediate early response 3 [Source:MGI Symbol;Acc:MGI:104814]
ENSMUSG00000003545	2.06535	0.22246	5.34228	0.0416414	0.966785	NA	Fosb	FBJ osteosarcoma oncogene B [Source:MGI Symbol;Acc:MGI:95575]
ENSMUSG00000003546	18.6607	0.983148	1.81102	0.54287	0.587219	0.860146	Klc4	kinesin light chain 4 [Source:MGI Symbol;Acc:MGI:1922014]
ENSMUSG00000003549	8.05852	-0.498466	2.0608	-0.24188	0.808873	0.94158	Ercc1	excision repair cross-complementing rodent repair deficiency, complementation group 1 [Source:MGI Symbol;Acc:MGI:95412]
ENSMUSG00000003555	2.65938	7.75743	5.56515	1.39393	0.163339	NA	Cyp17a1	cytochrome P450, family 17, subfamily a, polypeptide 1 [Source:MGI Symbol;Acc:MGI:88586]
ENSMUSG00000003559	6.02067	-1.00213	2.0072	-0.499266	0.617592	0.872323	As3mt	arsenite methyltransferase [Source:MGI Symbol;Acc:MGI:1929882]
ENSMUSG00000003573	1.01875	2.098	6.1112	0.343304	0.73137	NA	Homer3	homer scaffolding protein 3 [Source:MGI Symbol;Acc:MGI:1347359]
ENSMUSG00000003575	3.10209	3.97839	4.43942	0.89615	0.370173	NA	Crtc1	CREB regulated transcription coactivator 1 [Source:MGI Symbol;Acc:MGI:2142523]
ENSMUSG00000003581	14.4599	0.298094	1.07985	0.276053	0.782508	0.934104	Rnf215	ring finger protein 215 [Source:MGI Symbol;Acc:MGI:1918923]
ENSMUSG00000003585	12.1695	-0.343546	1.33053	-0.258202	0.796251	0.938067	Sec14l2	SEC14-like lipid binding 2 [Source:MGI Symbol;Acc:MGI:1915065]
ENSMUSG00000003604	138.649	1.20084	0.279233	4.3005	1.7e-05	0.000360753	Aven	apoptosis, caspase activation inhibitor [Source:MGI Symbol;Acc:MGI:1921518]
ENSMUSG00000003617	7.8434	0.141151	1.39089	0.101483	0.919167	0.975188	Cp	ceruloplasmin [Source:MGI Symbol;Acc:MGI:88476]
ENSMUSG00000003623	6.65508	-0.658838	1.89191	-0.34824	0.72766	0.916725	Crot	carnitine O-octanoyltransferase [Source:MGI Symbol;Acc:MGI:1921364]
ENSMUSG00000003644	19.0688	0.403744	1.8638	0.216624	0.828501	0.948865	Rps6ka1	ribosomal protein S6 kinase polypeptide 1 [Source:MGI Symbol;Acc:MGI:104558]
ENSMUSG00000003657	0	NA	NA	NA	NA	NA	Calb2	calbindin 2 [Source:MGI Symbol;Acc:MGI:101914]
ENSMUSG00000003660	390.267	-1.03084	0.239752	-4.2996	1.71e-05	0.000361123	Snrnp200	small nuclear ribonucleoprotein 200 (U5) [Source:MGI Symbol;Acc:MGI:2444401]
ENSMUSG00000003662	25.7564	-0.527587	0.911842	-0.578595	0.562862	0.849595	Ciao1	cytosolic iron-sulfur protein assembly 1 [Source:MGI Symbol;Acc:MGI:1346998]
ENSMUSG00000003665	2.77816	2.7736	3.32925	0.8331	0.404788	NA	Has1	hyaluronan synthase 1 [Source:MGI Symbol;Acc:MGI:106590]
ENSMUSG00000003680	10.869	1.48384	1.94101	0.764467	0.444589	0.780733	Taf6l	TATA-box binding protein associated factor 6 like [Source:MGI Symbol;Acc:MGI:2444957]
ENSMUSG00000003721	15.743	0.517045	1.1793	0.438436	0.661071	0.888808	Insig2	insulin induced gene 2 [Source:MGI Symbol;Acc:MGI:1920249]
ENSMUSG00000003731	254.625	-0.959809	1.68633	-0.56917	0.569241	0.852697	Kpna6	karyopherin subunit alpha 6 [Source:MGI Symbol;Acc:MGI:1100836]
ENSMUSG00000003746	0.753899	2.1961	6.10216	0.359888	0.718931	NA	Man1a	mannosidase 1, alpha [Source:MGI Symbol;Acc:MGI:104677]
ENSMUSG00000003752	21.6091	1.86861	1.57719	1.18477	0.236108	0.586857	Itpkc	inositol 1,4,5-trisphosphate 3-kinase C [Source:MGI Symbol;Acc:MGI:2442554]
ENSMUSG00000003762	5.58998	1.03987	2.16112	0.481173	0.630393	0.87771	Coq8b	coenzyme Q8B [Source:MGI Symbol;Acc:MGI:1924139]
ENSMUSG00000003778	34.7728	-0.106228	1.76787	-0.0600884	0.952085	0.984282	Brd8	bromodomain containing 8 [Source:MGI Symbol;Acc:MGI:1925906]
ENSMUSG00000003779	67.1944	-1.35325	1.3196	-1.0255	0.305126	0.664041	Kif20a	kinesin family member 20A [Source:MGI Symbol;Acc:MGI:1201682]
ENSMUSG00000003808	16.9549	0.490392	1.87695	0.261271	0.793884	0.938067	Farsa	phenylalanyl-tRNA synthetase, alpha subunit [Source:MGI Symbol;Acc:MGI:1913840]
ENSMUSG00000003809	1.46182	1.4298	5.7347	0.249325	0.80311	NA	Gcdh	glutaryl-Coenzyme A dehydrogenase [Source:MGI Symbol;Acc:MGI:104541]
ENSMUSG00000003810	98.5537	2.56791	1.70582	1.50538	0.132226	0.439474	Mast2	microtubule associated serine/threonine kinase 2 [Source:MGI Symbol;Acc:MGI:894676]
ENSMUSG00000003812	0.174626	3.6194	6.21628	0.582246	0.560401	NA	Dnase2a	deoxyribonuclease II alpha [Source:MGI Symbol;Acc:MGI:1329019]
ENSMUSG00000003813	20.0728	2.17087	1.52237	1.42599	0.153872	0.47873	Rad23a	RAD23 homolog A, nucleotide excision repair protein [Source:MGI Symbol;Acc:MGI:105126]
ENSMUSG00000003814	628.167	-1.03445	0.26832	-3.85527	0.000115604	0.00203167	Calr	calreticulin [Source:MGI Symbol;Acc:MGI:88252]
ENSMUSG00000003824	112.19	1.9656	1.69668	1.1585	0.246661	0.600923	Syce2	synaptonemal complex central element protein 2 [Source:MGI Symbol;Acc:MGI:1919096]
ENSMUSG00000003847	12.1901	-0.948976	2.04074	-0.465016	0.64192	0.88051	Nfat5	nuclear factor of activated T cells 5 [Source:MGI Symbol;Acc:MGI:1859333]
ENSMUSG00000003848	5.37685	-1.18606	2.34122	-0.506598	0.612437	0.870241	Nob1	NIN1/RPN12 binding protein 1 homolog [Source:MGI Symbol;Acc:MGI:1914869]
ENSMUSG00000003849	0.90086	-1.24377	6.09858	-0.203945	0.838397	NA	Nqo1	NAD(P)H dehydrogenase, quinone 1 [Source:MGI Symbol;Acc:MGI:103187]
ENSMUSG00000003863	0.34229	-1.56424	6.14696	-0.254474	0.799129	NA	Ppfia3	protein tyrosine phosphatase, receptor type, f polypeptide (PTPRF), interacting protein (liprin), alpha 3 [Source:MGI Symbol;Acc:MGI:1924037]
ENSMUSG00000003865	1.30768	-3.35735	4.33761	-0.774008	0.438926	NA	Gys1	glycogen synthase 1, muscle [Source:MGI Symbol;Acc:MGI:101805]
ENSMUSG00000003868	304.048	-2.08755	1.68016	-1.24247	0.214063	0.562056	Ruvbl2	RuvB-like AAA ATPase 2 [Source:MGI Symbol;Acc:MGI:1342299]
ENSMUSG00000003872	0.669585	11.416	6.10018	1.87142	0.0612864	NA	Lin7b	lin-7 homolog B, crumbs cell polarity complex component [Source:MGI Symbol;Acc:MGI:1330858]
ENSMUSG00000003873	1.92724	1.49529	4.6777	0.319663	0.749224	NA	Bax	BCL2-associated X protein [Source:MGI Symbol;Acc:MGI:99702]
ENSMUSG00000003882	0	NA	NA	NA	NA	NA	Il7r	interleukin 7 receptor [Source:MGI Symbol;Acc:MGI:96562]
ENSMUSG00000003923	395.062	0.323985	0.451837	0.717041	0.473349	0.797564	Tfam	transcription factor A, mitochondrial [Source:MGI Symbol;Acc:MGI:107810]
ENSMUSG00000003929	3.8164	2.40407	2.03949	1.17876	0.238493	NA	Zfp81	zinc finger protein 81 [Source:MGI Symbol;Acc:MGI:1890752]
ENSMUSG00000003934	10.4023	-3.70131	1.46768	-2.52188	0.011673	0.0900962	Efnb3	ephrin B3 [Source:MGI Symbol;Acc:MGI:109196]
ENSMUSG00000003948	0.111	3.12292	6.22788	0.501441	0.616061	NA	Mmd	monocyte to macrophage differentiation-associated [Source:MGI Symbol;Acc:MGI:1914718]
ENSMUSG00000003949	0.315049	0.752674	6.21816	0.121044	0.903656	NA	Hlf	hepatic leukemia factor [Source:MGI Symbol;Acc:MGI:96108]
ENSMUSG00000003955	15.3519	0.339621	1.78514	0.190249	0.849114	0.955604	Fam162a	family with sequence similarity 162, member A [Source:MGI Symbol;Acc:MGI:1917436]
ENSMUSG00000003970	67.598	1.14865	1.71312	0.670502	0.502538	0.815936	Rpl8	ribosomal protein L8 [Source:MGI Symbol;Acc:MGI:1350927]
ENSMUSG00000003974	0.846581	2.85914	6.14691	0.465135	0.641835	NA	Grm3	glutamate receptor, metabotropic 3 [Source:MGI Symbol;Acc:MGI:1351340]
ENSMUSG00000003992	3.20038	1.17812	2.44771	0.481315	0.630293	NA	Ssbp2	single-stranded DNA binding protein 2 [Source:MGI Symbol;Acc:MGI:1914220]
ENSMUSG00000004018	98.503	-0.892406	0.461439	-1.93396	0.0531176	0.258852	Fancl	Fanconi anemia, complementation group L [Source:MGI Symbol;Acc:MGI:1914280]
ENSMUSG00000004031	0	NA	NA	NA	NA	NA	Brinp2	bone morphogenic protein/retinoic acid inducible neural-specific 2 [Source:MGI Symbol;Acc:MGI:2443333]
ENSMUSG00000004032	1584.28	3.3584	1.67172	2.00894	0.0445432	0.229889	Gstm5	glutathione S-transferase, mu 5 [Source:MGI Symbol;Acc:MGI:1309466]
ENSMUSG00000004035	11.7363	3.43374	2.02981	1.69165	0.0907121	0.356938	Gstm7	glutathione S-transferase, mu 7 [Source:MGI Symbol;Acc:MGI:1915562]
ENSMUSG00000004038	0.494972	4.04254	6.20541	0.651455	0.514753	NA	Gstm3	glutathione S-transferase, mu 3 [Source:MGI Symbol;Acc:MGI:106026]
ENSMUSG00000004040	11.4857	-0.51591	1.95841	-0.263433	0.792217	0.938067	Stat3	signal transducer and activator of transcription 3 [Source:MGI Symbol;Acc:MGI:103038]
ENSMUSG00000004043	0.621628	5.33129	6.15826	0.865713	0.386648	NA	Stat5a	signal transducer and activator of transcription 5A [Source:MGI Symbol;Acc:MGI:103036]
ENSMUSG00000004044	10.7081	0.526542	1.83656	0.286699	0.774343	0.93147	Cavin1	caveolae associated 1 [Source:MGI Symbol;Acc:MGI:1277968]
ENSMUSG00000004054	12.8472	2.28296	1.04676	2.18097	0.0291856	0.171717	Map3k11	mitogen-activated protein kinase kinase kinase 11 [Source:MGI Symbol;Acc:MGI:1346880]
ENSMUSG00000004056	1.89263	1.88009	5.31852	0.353499	0.723714	NA	Akt2	thymoma viral proto-oncogene 2 [Source:MGI Symbol;Acc:MGI:104874]
ENSMUSG00000004069	23.2517	-1.92484	1.8671	-1.03092	0.302576	0.661317	Dnaja3	DnaJ heat shock protein family (Hsp40) member A3 [Source:MGI Symbol;Acc:MGI:1933786]
ENSMUSG00000004070	565.277	2.29115	0.403566	5.67725	1.37e-08	5.24e-07	Hmox2	heme oxygenase 2 [Source:MGI Symbol;Acc:MGI:109373]
ENSMUSG00000004071	4654.77	-1.57959	0.509117	-3.1026	0.00191827	0.0221185	Cdip1	cell death inducing Trp53 target 1 [Source:MGI Symbol;Acc:MGI:1913876]
ENSMUSG00000004085	3.24371	2.55408	2.353	1.08546	0.277719	NA	Map3k20	mitogen-activated protein kinase kinase kinase 20 [Source:MGI Symbol;Acc:MGI:2443258]
ENSMUSG00000004096	20.7513	-0.0712733	1.8206	-0.0391483	0.968772	0.988711	Cwc15	CWC15 spliceosome-associated protein [Source:MGI Symbol;Acc:MGI:1913320]
ENSMUSG00000004098	0.549512	-1.36211	6.10871	-0.222979	0.823552	NA	Col5a3	collagen, type V, alpha 3 [Source:MGI Symbol;Acc:MGI:1858212]
ENSMUSG00000004099	36.6382	-1.20962	1.74597	-0.692804	0.488433	0.808921	Dnmt1	DNA methyltransferase 1 [Source:MGI Symbol;Acc:MGI:94912]
ENSMUSG00000004100	10.3116	2.21084	1.96204	1.12681	0.259825	0.615084	Ppan	peter pan homolog [Source:MGI Symbol;Acc:MGI:2178445]
ENSMUSG00000004105	9.33099	7.15358	1.77863	4.02195	5.77e-05	0.00110025	Angptl2	angiopoietin-like 2 [Source:MGI Symbol;Acc:MGI:1347002]
ENSMUSG00000004110	2.58473	1.89236	3.6536	0.517944	0.604497	NA	Cacna1e	calcium channel, voltage-dependent, R type, alpha 1E subunit [Source:MGI Symbol;Acc:MGI:106217]
ENSMUSG00000004113	0.902636	-0.277462	6.08429	-0.0456031	0.963627	NA	Cacna1b	calcium channel, voltage-dependent, N type, alpha 1B subunit [Source:MGI Symbol;Acc:MGI:88296]
ENSMUSG00000004127	36.3861	1.73517	1.5828	1.09627	0.272961	0.629831	Trmt10a	tRNA methyltransferase 10A [Source:MGI Symbol;Acc:MGI:1920421]
ENSMUSG00000004151	0.164991	3.17449	6.23278	0.509322	0.610526	NA	Etv1	ets variant 1 [Source:MGI Symbol;Acc:MGI:99254]
ENSMUSG00000004187	0.837723	0.363506	6.0825	0.0597625	0.952345	NA	Kifc2	kinesin family member C2 [Source:MGI Symbol;Acc:MGI:109187]
ENSMUSG00000004207	72.9427	1.21714	1.70918	0.712119	0.476391	0.799907	Psap	prosaposin [Source:MGI Symbol;Acc:MGI:97783]
ENSMUSG00000004221	1.5296	0.281059	5.60997	0.0500999	0.960043	NA	Ikbkg	inhibitor of kappaB kinase gamma [Source:MGI Symbol;Acc:MGI:1338074]
ENSMUSG00000004231	0	NA	NA	NA	NA	NA	Pax2	paired box 2 [Source:MGI Symbol;Acc:MGI:97486]
ENSMUSG00000004233	1.17102	-2.06166	3.97744	-0.518339	0.604222	NA	Wars2	tryptophanyl tRNA synthetase 2 (mitochondrial) [Source:MGI Symbol;Acc:MGI:1917810]
ENSMUSG00000004263	0.824953	4.57993	6.18534	0.74045	0.459027	NA	Atn1	atrophin 1 [Source:MGI Symbol;Acc:MGI:104725]
ENSMUSG00000004264	14.4245	0.529806	1.92732	0.274893	0.783399	0.934641	Phb2	prohibitin 2 [Source:MGI Symbol;Acc:MGI:102520]
ENSMUSG00000004266	0.232115	-1.9571	6.1378	-0.31886	0.749833	NA	Ptpn6	protein tyrosine phosphatase, non-receptor type 6 [Source:MGI Symbol;Acc:MGI:96055]
ENSMUSG00000004267	0.120553	-0.201849	6.18556	-0.0326323	0.973968	NA	Eno2	enolase 2, gamma neuronal [Source:MGI Symbol;Acc:MGI:95394]
ENSMUSG00000004268	11.3314	1.29795	2.25566	0.575418	0.565009	0.850798	Emg1	EMG1 N1-specific pseudouridine methyltransferase [Source:MGI Symbol;Acc:MGI:1315195]
ENSMUSG00000004270	71.2401	0.726855	0.509829	1.42569	0.153959	0.478843	Lpcat3	lysophosphatidylcholine acyltransferase 3 [Source:MGI Symbol;Acc:MGI:1315211]
ENSMUSG00000004285	8.95017	-2.00811	1.77126	-1.13372	0.256913	0.611297	Atp6v1f	ATPase, H+ transporting, lysosomal V1 subunit F [Source:MGI Symbol;Acc:MGI:1913394]
ENSMUSG00000004296	0	NA	NA	NA	NA	NA	Il12b	interleukin 12b [Source:MGI Symbol;Acc:MGI:96540]
ENSMUSG00000004317	3.92395	-0.693483	2.33157	-0.297432	0.766137	NA	Clcn5	chloride channel, voltage-sensitive 5 [Source:MGI Symbol;Acc:MGI:99486]
ENSMUSG00000004319	25.8914	-0.58303	1.83146	-0.318341	0.750226	0.923289	Clcn3	chloride channel, voltage-sensitive 3 [Source:MGI Symbol;Acc:MGI:103555]
ENSMUSG00000004328	0.96617	1.1417	4.31401	0.264649	0.79128	NA	Hif3a	hypoxia inducible factor 3, alpha subunit [Source:MGI Symbol;Acc:MGI:1859778]
ENSMUSG00000004341	23.797	2.15043	1.0804	1.99039	0.0465475	0.236362	Gpx6	glutathione peroxidase 6 [Source:MGI Symbol;Acc:MGI:1922762]
ENSMUSG00000004344	0	NA	NA	NA	NA	NA	Gpx5	glutathione peroxidase 5 [Source:MGI Symbol;Acc:MGI:104886]
ENSMUSG00000004347	143.731	-0.753981	1.30987	-0.575613	0.564877	0.850798	Pde1c	phosphodiesterase 1C [Source:MGI Symbol;Acc:MGI:108413]
ENSMUSG00000004356	97.0386	-1.41138	0.415346	-3.39809	0.000678572	0.0093119	Utp20	UTP20 small subunit processome component [Source:MGI Symbol;Acc:MGI:1917933]
ENSMUSG00000004359	0	NA	NA	NA	NA	NA	Spic	Spi-C transcription factor (Spi-1/PU.1 related) [Source:MGI Symbol;Acc:MGI:1341168]
ENSMUSG00000004360	0	NA	NA	NA	NA	NA	9330159F19Rik	RIKEN cDNA 9330159F19 gene [Source:MGI Symbol;Acc:MGI:3036239]
ENSMUSG00000004364	236.825	-0.141143	0.420563	-0.335604	0.73717	0.92061	Cul3	cullin 3 [Source:MGI Symbol;Acc:MGI:1347360]
ENSMUSG00000004366	0	NA	NA	NA	NA	NA	Sst	somatostatin [Source:MGI Symbol;Acc:MGI:98326]
ENSMUSG00000004371	5.57735	2.45543	2.20411	1.11402	0.265269	0.621591	Il11	interleukin 11 [Source:MGI Symbol;Acc:MGI:107613]
ENSMUSG00000004383	1.11053	0.0625726	6.08437	0.0102842	0.991795	NA	Large1	LARGE xylosyl- and glucuronyltransferase 1 [Source:MGI Symbol;Acc:MGI:1342270]
ENSMUSG00000004393	28.8384	-1.33759	0.597688	-2.23793	0.0252255	0.156514	Ddx56	DEAD box helicase 56 [Source:MGI Symbol;Acc:MGI:1277172]
ENSMUSG00000004394	65.7235	-0.308203	0.442958	-0.695783	0.486564	0.808408	Tmed4	transmembrane p24 trafficking protein 4 [Source:MGI Symbol;Acc:MGI:1915070]
ENSMUSG00000004415	4.22985	0.451178	2.78851	0.161799	0.871464	NA	Col26a1	collagen, type XXVI, alpha 1 [Source:MGI Symbol;Acc:MGI:2155345]
ENSMUSG00000004446	2.72687	-4.23624	2.60488	-1.62627	0.103892	NA	Bid	BH3 interacting domain death agonist [Source:MGI Symbol;Acc:MGI:108093]
ENSMUSG00000004451	6.13407	4.99896	2.18136	2.29167	0.0219246	0.141597	Ralb	v-ral simian leukemia viral oncogene B [Source:MGI Symbol;Acc:MGI:1927244]
ENSMUSG00000004455	0	NA	NA	NA	NA	NA	Ppp1cc	protein phosphatase 1 catalytic subunit gamma [Source:MGI Symbol;Acc:MGI:104872]
ENSMUSG00000004460	40.9384	0.013486	0.691386	0.0195057	0.984438	0.995094	Dnajb11	DnaJ heat shock protein family (Hsp40) member B11 [Source:MGI Symbol;Acc:MGI:1915088]
ENSMUSG00000004462	4.90226	-1.16697	2.19075	-0.532681	0.594254	0.86204	Tbccd1	TBCC domain containing 1 [Source:MGI Symbol;Acc:MGI:1917823]
ENSMUSG00000004473	17.7496	0.530269	1.76516	0.300408	0.763866	0.928801	Clec11a	C-type lectin domain family 11, member a [Source:MGI Symbol;Acc:MGI:1298219]
ENSMUSG00000004500	0	NA	NA	NA	NA	NA	Zfp324	zinc finger protein 324 [Source:MGI Symbol;Acc:MGI:2444641]
ENSMUSG00000004508	50.4388	2.04515	0.747843	2.73473	0.00624314	0.0556351	Gab2	growth factor receptor bound protein 2-associated protein 2 [Source:MGI Symbol;Acc:MGI:1333854]
ENSMUSG00000004530	2.66542	-3.08616	4.31906	-0.714545	0.474891	NA	Coro1c	coronin, actin binding protein 1C [Source:MGI Symbol;Acc:MGI:1345964]
ENSMUSG00000004535	489.509	-1.1019	0.159544	-6.90658	4.96e-12	3.11e-10	Tax1bp1	Tax1 (human T cell leukemia virus type I) binding protein 1 [Source:MGI Symbol;Acc:MGI:1289308]
ENSMUSG00000004540	1.86578	-1.2613	3.33857	-0.377798	0.705581	NA	Psg17	pregnancy specific beta-1-glycoprotein 17 [Source:MGI Symbol;Acc:MGI:1347250]
ENSMUSG00000004542	2.37533	6.83101	4.21454	1.62082	0.105056	NA	Psg19	pregnancy specific beta-1-glycoprotein 19 [Source:MGI Symbol;Acc:MGI:1347252]
ENSMUSG00000004552	0	NA	NA	NA	NA	NA	Ctse	cathepsin E [Source:MGI Symbol;Acc:MGI:107361]
ENSMUSG00000004558	1.70652	-0.941148	4.99327	-0.188483	0.850498	NA	Ndrg2	N-myc downstream regulated gene 2 [Source:MGI Symbol;Acc:MGI:1352498]
ENSMUSG00000004561	3.65103	0.641865	2.76899	0.231805	0.81669	NA	Mettl17	methyltransferase like 17 [Source:MGI Symbol;Acc:MGI:1098577]
ENSMUSG00000004562	6.50544	4.16161	1.82382	2.28181	0.0225003	0.144345	Arhgef40	Rho guanine nucleotide exchange factor 40 [Source:MGI Symbol;Acc:MGI:2685515]
ENSMUSG00000004565	1.94702	-0.457353	3.91922	-0.116695	0.907102	NA	Pnpla6	patatin-like phospholipase domain containing 6 [Source:MGI Symbol;Acc:MGI:1354723]
ENSMUSG00000004567	2.33934	-4.21734	4.31339	-0.977731	0.328208	NA	Mcoln1	mucolipin 1 [Source:MGI Symbol;Acc:MGI:1890498]
ENSMUSG00000004568	4.05533	2.96105	2.47048	1.19857	0.230695	NA	Arhgef18	Rho/Rac guanine nucleotide exchange factor 18 [Source:MGI Symbol;Acc:MGI:2142567]
ENSMUSG00000004591	36.824	1.04823	0.804643	1.30273	0.192666	0.535027	Pkn2	protein kinase N2 [Source:MGI Symbol;Acc:MGI:109211]
ENSMUSG00000004609	2.28502	11.6019	5.01755	2.31227	0.0207627	NA	Cd33	CD33 molecule [Source:MGI Symbol;Acc:MGI:99440]
ENSMUSG00000004610	7.00693	-0.217815	1.28748	-0.169179	0.865655	0.960829	Etfb	electron transferring flavoprotein, beta polypeptide [Source:MGI Symbol;Acc:MGI:106098]
ENSMUSG00000004612	0	NA	NA	NA	NA	NA	Nkg7	natural killer cell group 7 sequence [Source:MGI Symbol;Acc:MGI:1931250]
ENSMUSG00000004626	49.8357	-0.79989	1.73646	-0.460644	0.645054	0.882289	Stxbp2	syntaxin binding protein 2 [Source:MGI Symbol;Acc:MGI:107370]
ENSMUSG00000004630	1.00656	1.17534	5.72603	0.205262	0.837367	NA	Pcp2	Purkinje cell protein 2 (L7) [Source:MGI Symbol;Acc:MGI:97508]
ENSMUSG00000004631	0.995928	-1.18429	5.83057	-0.203117	0.839043	NA	Sgce	sarcoglycan, epsilon [Source:MGI Symbol;Acc:MGI:1329042]
ENSMUSG00000004633	120.673	2.16947	1.7087	1.26966	0.204206	0.548202	Chn2	chimerin 2 [Source:MGI Symbol;Acc:MGI:1917243]
ENSMUSG00000004637	9.49391	0.508387	1.32734	0.383011	0.701711	0.905882	Wwox	WW domain-containing oxidoreductase [Source:MGI Symbol;Acc:MGI:1931237]
ENSMUSG00000004642	40.9002	0.363915	1.17156	0.310624	0.756087	0.92601	Slbp	stem-loop binding protein [Source:MGI Symbol;Acc:MGI:108402]
ENSMUSG00000004651	0	NA	NA	NA	NA	NA	Tyr	tyrosinase [Source:MGI Symbol;Acc:MGI:98880]
ENSMUSG00000004654	0	NA	NA	NA	NA	NA	Ghrhr	growth hormone releasing hormone receptor [Source:MGI Symbol;Acc:MGI:95710]
ENSMUSG00000004655	0.837278	3.29146	4.69564	0.700962	0.483327	NA	Aqp1	aquaporin 1 [Source:MGI Symbol;Acc:MGI:103201]
ENSMUSG00000004661	19.8375	0.48076	1.81486	0.264902	0.791085	0.937754	Arid3b	AT-rich interaction domain 3B [Source:MGI Symbol;Acc:MGI:1930768]
ENSMUSG00000004665	3.12273	5.95602	2.56601	2.32112	0.0202804	NA	Cnn2	calponin 2 [Source:MGI Symbol;Acc:MGI:105093]
ENSMUSG00000004667	13.6291	0.17164	2.00637	0.0855474	0.931826	0.978066	Polr2e	polymerase (RNA) II (DNA directed) polypeptide E [Source:MGI Symbol;Acc:MGI:1913670]
ENSMUSG00000004668	1.15451	-1.93971	3.23108	-0.600328	0.548287	NA	Abca13	ATP-binding cassette, sub-family A member 13 [Source:MGI Symbol;Acc:MGI:2388707]
ENSMUSG00000004677	10.496	-1.18897	2.29569	-0.517915	0.604518	0.867362	Myo9b	myosin IXb [Source:MGI Symbol;Acc:MGI:106624]
ENSMUSG00000004698	4.59728	5.52314	3.04727	1.81249	0.0699111	NA	Hdac9	histone deacetylase 9 [Source:MGI Symbol;Acc:MGI:1931221]
ENSMUSG00000004707	3.82216	-2.93254	3.06213	-0.957679	0.338225	NA	Ly9	lymphocyte antigen 9 [Source:MGI Symbol;Acc:MGI:96885]
ENSMUSG00000004709	0	NA	NA	NA	NA	NA	Cd244a	CD244 molecule A [Source:MGI Symbol;Acc:MGI:109294]
ENSMUSG00000004730	0.513406	-2.95086	6.12941	-0.481427	0.630213	NA	Adgre1	adhesion G protein-coupled receptor E1 [Source:MGI Symbol;Acc:MGI:106912]
ENSMUSG00000004748	4.9614	3.33063	2.01035	1.65674	0.0975717	0.371314	Mtfp1	mitochondrial fission process 1 [Source:MGI Symbol;Acc:MGI:1916686]
ENSMUSG00000004768	5.05835	1.26995	2.5128	0.505394	0.613282	0.870426	Rab23	RAB23, member RAS oncogene family [Source:MGI Symbol;Acc:MGI:99833]
ENSMUSG00000004771	46.5645	-1.11251	1.73438	-0.641446	0.521233	0.827588	Rab11a	RAB11A, member RAS oncogene family [Source:MGI Symbol;Acc:MGI:1858202]
ENSMUSG00000004788	7.89353	-3.19147	2.00239	-1.59383	0.110975	0.401402	Eif2b2	eukaryotic translation initiation factor 2B, subunit 2 beta [Source:MGI Symbol;Acc:MGI:2145118]
ENSMUSG00000004789	37.1379	-0.944744	1.80031	-0.524766	0.599746	0.864709	Dlst	dihydrolipoamide S-succinyltransferase [Source:MGI Symbol;Acc:MGI:1926170]
ENSMUSG00000004791	2.08708	-0.532684	3.89001	-0.136936	0.891081	NA	Pgf	placental growth factor [Source:MGI Symbol;Acc:MGI:105095]
ENSMUSG00000004798	120.953	2.37874	0.557985	4.26309	2.02e-05	0.000422687	Ulk2	unc-51 like kinase 2 [Source:MGI Symbol;Acc:MGI:1352758]
ENSMUSG00000004814	0.432476	-0.646329	6.13311	-0.105384	0.916071	NA	Ccl24	C-C motif chemokine ligand 24 [Source:MGI Symbol;Acc:MGI:1928953]
ENSMUSG00000004815	0.24575	-2.02732	6.1372	-0.330333	0.741148	NA	Dgkq	diacylglycerol kinase, theta [Source:MGI Symbol;Acc:MGI:102918]
ENSMUSG00000004821	0.341491	4.01812	6.20813	0.647235	0.51748	NA	Tmed11	transmembrane p24 trafficking protein 11 [Source:MGI Symbol;Acc:MGI:1914616]
ENSMUSG00000004837	0.72326	2.63663	6.15977	0.428041	0.668621	NA	Grap	GRB2-related adaptor protein [Source:MGI Symbol;Acc:MGI:1918770]
ENSMUSG00000004842	2.9832	2.74979	3.49014	0.787874	0.430771	NA	Pou1f1	POU domain, class 1, transcription factor 1 [Source:MGI Symbol;Acc:MGI:97588]
ENSMUSG00000004843	86.8048	0.539808	1.33925	0.403067	0.686899	0.899436	Chmp2b	charged multivesicular body protein 2B [Source:MGI Symbol;Acc:MGI:1916192]
ENSMUSG00000004846	5.15406	-2.28429	1.6342	-1.3978	0.162174	0.48945	Plod3	procollagen-lysine, 2-oxoglutarate 5-dioxygenase 3 [Source:MGI Symbol;Acc:MGI:1347008]
ENSMUSG00000004849	8.15938	-0.662591	1.90105	-0.34854	0.727435	0.916616	Ap1s1	adaptor protein complex AP-1, sigma 1 [Source:MGI Symbol;Acc:MGI:1098244]
ENSMUSG00000004864	0	NA	NA	NA	NA	NA	Mapk13	mitogen-activated protein kinase 13 [Source:MGI Symbol;Acc:MGI:1346864]
ENSMUSG00000004865	194.054	0.946018	1.68326	0.562016	0.574105	0.854146	Srpk1	serine/arginine-rich protein specific kinase 1 [Source:MGI Symbol;Acc:MGI:106908]
ENSMUSG00000004872	0.129804	-0.943487	6.15557	-0.153274	0.878182	NA	Pax3	paired box 3 [Source:MGI Symbol;Acc:MGI:97487]
ENSMUSG00000004880	12.0471	-3.27416	1.6133	-2.02949	0.0424089	0.222765	Lbr	lamin B receptor [Source:MGI Symbol;Acc:MGI:2138281]
ENSMUSG00000004885	0.361306	-1.638	6.14567	-0.266529	0.789832	NA	Crabp2	cellular retinoic acid binding protein II [Source:MGI Symbol;Acc:MGI:88491]
ENSMUSG00000004891	0.873604	-1.81037	6.11064	-0.296265	0.767028	NA	Nes	nestin [Source:MGI Symbol;Acc:MGI:101784]
ENSMUSG00000004892	2.46118	2.0897	3.19516	0.654019	0.513099	NA	Bcan	brevican [Source:MGI Symbol;Acc:MGI:1096385]
ENSMUSG00000004894	3.17242	-0.824022	3.3957	-0.242667	0.808264	NA	Hapln2	hyaluronan and proteoglycan link protein 2 [Source:MGI Symbol;Acc:MGI:2137300]
ENSMUSG00000004895	34.3984	-0.189665	0.644362	-0.294345	0.768494	0.929515	Prcc	papillary renal cell carcinoma (translocation-associated) [Source:MGI Symbol;Acc:MGI:2137738]
ENSMUSG00000004896	3.89974	-1.12745	2.52134	-0.447163	0.654757	NA	Mettl25b	methyltransferase like 25B [Source:MGI Symbol;Acc:MGI:2387197]
ENSMUSG00000004897	170.79	0.0141737	0.274203	0.0516904	0.958775	0.985444	Hdgf	heparin binding growth factor [Source:MGI Symbol;Acc:MGI:1194494]
ENSMUSG00000004902	12.667	1.48606	1.88866	0.786835	0.431378	0.769853	Slc25a18	solute carrier family 25 (mitochondrial carrier), member 18 [Source:MGI Symbol;Acc:MGI:1919053]
ENSMUSG00000004929	388.46	0.610778	0.177403	3.44288	0.000575558	0.00809152	Thop1	thimet oligopeptidase 1 [Source:MGI Symbol;Acc:MGI:1354165]
ENSMUSG00000004931	7.26628	1.84394	2.1995	0.838345	0.401837	0.748054	Apba3	amyloid beta precursor protein binding family A member 3 [Source:MGI Symbol;Acc:MGI:1888527]
ENSMUSG00000004933	0.402964	1.85863	6.13014	0.303195	0.761741	NA	Matk	megakaryocyte-associated tyrosine kinase [Source:MGI Symbol;Acc:MGI:99259]
ENSMUSG00000004934	154.473	-0.291364	0.369885	-0.787716	0.430863	0.76966	Pias4	protein inhibitor of activated STAT 4 [Source:MGI Symbol;Acc:MGI:2136940]
ENSMUSG00000004936	5.02891	-1.02536	1.88718	-0.543331	0.586902	0.859972	Map2k1	mitogen-activated protein kinase kinase 1 [Source:MGI Symbol;Acc:MGI:1346866]
ENSMUSG00000004937	64.2731	0.921799	1.73965	0.529875	0.596198	0.862617	Sgta	small glutamine-rich tetratricopeptide repeat (TPR)-containing, alpha [Source:MGI Symbol;Acc:MGI:1098703]
ENSMUSG00000004939	108.758	3.11497	1.69754	1.83499	0.0665073	0.298446	Nmrk2	nicotinamide riboside kinase 2 [Source:MGI Symbol;Acc:MGI:1916814]
ENSMUSG00000004945	28.6564	-0.702239	0.868252	-0.808796	0.418633	0.761506	Tmem242	transmembrane protein 242 [Source:MGI Symbol;Acc:MGI:1917794]
ENSMUSG00000004947	10.655	1.23403	2.00619	0.615112	0.538481	0.838122	Dtx2	deltex 2, E3 ubiquitin ligase [Source:MGI Symbol;Acc:MGI:1921448]
ENSMUSG00000004948	0.762044	2.02829	6.10393	0.332292	0.739669	NA	Zp3	zona pellucida glycoprotein 3 [Source:MGI Symbol;Acc:MGI:99215]
ENSMUSG00000004951	1.4935	2.7483	4.38489	0.626767	0.530812	NA	Hspb1	heat shock protein 1 [Source:MGI Symbol;Acc:MGI:96240]
ENSMUSG00000004952	0.703745	-3.51007	6.12639	-0.572942	0.566684	NA	Rasa4	RAS p21 protein activator 4 [Source:MGI Symbol;Acc:MGI:1858600]
ENSMUSG00000004961	26.5812	-2.46614	1.20676	-2.0436	0.0409929	0.217868	Syt5	synaptotagmin V [Source:MGI Symbol;Acc:MGI:1926368]
ENSMUSG00000004980	158.359	-1.20011	1.43776	-0.834709	0.403881	0.749525	Hnrnpa2b1	heterogeneous nuclear ribonucleoprotein A2/B1 [Source:MGI Symbol;Acc:MGI:104819]
ENSMUSG00000004988	0	NA	NA	NA	NA	NA	Fxyd4	FXYD domain-containing ion transport regulator 4 [Source:MGI Symbol;Acc:MGI:1889005]
ENSMUSG00000004994	24.1765	-1.54631	1.84891	-0.836338	0.402965	0.749121	Yju2b	YJU2 splicing factor homolog B [Source:MGI Symbol;Acc:MGI:1914986]
ENSMUSG00000004996	3.17247	-1.89521	2.62286	-0.722575	0.469941	NA	Mri1	methylthioribose-1-phosphate isomerase 1 [Source:MGI Symbol;Acc:MGI:1915123]
ENSMUSG00000005034	3.9146	0.620535	2.52038	0.246207	0.805522	NA	Prkacb	protein kinase, cAMP dependent, catalytic, beta [Source:MGI Symbol;Acc:MGI:97594]
ENSMUSG00000005043	2.51508	6.49445	6.02075	1.07868	0.280732	NA	Sgsh	N-sulfoglucosamine sulfohydrolase (sulfamidase) [Source:MGI Symbol;Acc:MGI:1350341]
ENSMUSG00000005045	586.467	0.954797	1.68222	0.56758	0.57032	0.852697	Chd5	chromodomain helicase DNA binding protein 5 [Source:MGI Symbol;Acc:MGI:3036258]
ENSMUSG00000005054	0.200922	-0.871915	6.16202	-0.141498	0.887476	NA	Cstb	cystatin B [Source:MGI Symbol;Acc:MGI:109514]
ENSMUSG00000005057	0.442769	1.38955	6.13932	0.226336	0.82094	NA	Sh2b2	SH2B adaptor protein 2 [Source:MGI Symbol;Acc:MGI:1345171]
ENSMUSG00000005069	12.6231	1.55733	1.93614	0.804346	0.421197	0.764132	Pex5	peroxisomal biogenesis factor 5 [Source:MGI Symbol;Acc:MGI:1098808]
ENSMUSG00000005078	0.741198	-1.25866	6.1025	-0.206254	0.836592	NA	Jkamp	JNK1/MAPK8-associated membrane protein [Source:MGI Symbol;Acc:MGI:1915057]
ENSMUSG00000005087	0.219423	-1.25433	6.14989	-0.20396	0.838384	NA	Cd44	CD44 antigen [Source:MGI Symbol;Acc:MGI:88338]
ENSMUSG00000005089	12.7857	-2.08239	2.00033	-1.04102	0.297865	0.655905	Slc1a2	solute carrier family 1 (glial high affinity glutamate transporter), member 2 [Source:MGI Symbol;Acc:MGI:101931]
ENSMUSG00000005102	3.04309	-0.529768	3.41796	-0.154995	0.876825	NA	Eif2ak4	eukaryotic translation initiation factor 2 alpha kinase 4 [Source:MGI Symbol;Acc:MGI:1353427]
ENSMUSG00000005103	67.1929	3.0298	0.996909	3.0392	0.00237211	0.0260189	Wdr1	WD repeat domain 1 [Source:MGI Symbol;Acc:MGI:1337100]
ENSMUSG00000005107	0	NA	NA	NA	NA	NA	Slc2a9	solute carrier family 2 (facilitated glucose transporter), member 9 [Source:MGI Symbol;Acc:MGI:2152844]
ENSMUSG00000005124	1.746	2.14207	4.07414	0.525773	0.599046	NA	Ccn4	cellular communication network factor 4 [Source:MGI Symbol;Acc:MGI:1197008]
ENSMUSG00000005125	3.99089	0.482406	1.85951	0.259426	0.795306	NA	Ndrg1	N-myc downstream regulated gene 1 [Source:MGI Symbol;Acc:MGI:1341799]
ENSMUSG00000005131	45.2361	-5.14323	1.40476	-3.66129	0.000250953	0.00392192	4930550C14Rik	RIKEN cDNA 4930550C14 gene [Source:MGI Symbol;Acc:MGI:1922561]
ENSMUSG00000005142	30.5675	-0.826125	0.693552	-1.19115	0.233594	0.584166	Man2b1	mannosidase 2, alpha B1 [Source:MGI Symbol;Acc:MGI:107286]
ENSMUSG00000005148	15.4524	-0.188158	1.5197	-0.123812	0.901464	0.968546	Klf5	Kruppel-like transcription factor 5 [Source:MGI Symbol;Acc:MGI:1338056]
ENSMUSG00000005150	3.24759	-0.997813	2.67273	-0.373332	0.708902	NA	Wdr83	WD repeat domain containing 83 [Source:MGI Symbol;Acc:MGI:1915086]
ENSMUSG00000005161	6.49094	1.40661	3.19656	0.440038	0.65991	0.888557	Prdx2	peroxiredoxin 2 [Source:MGI Symbol;Acc:MGI:109486]
ENSMUSG00000005198	124.993	0.008908	0.824689	0.0108017	0.991382	0.997772	Polr2a	polymerase (RNA) II (DNA directed) polypeptide A [Source:MGI Symbol;Acc:MGI:98086]
ENSMUSG00000005202	1.08491	2.73835	4.86818	0.562499	0.573776	NA	Shbg	sex hormone binding globulin [Source:MGI Symbol;Acc:MGI:98295]
ENSMUSG00000005204	13.5132	-1.77381	1.77171	-1.00118	0.316739	0.674264	Senp3	SUMO/sentrin specific peptidase 3 [Source:MGI Symbol;Acc:MGI:2158736]
ENSMUSG00000005220	10.3042	-0.866833	1.61124	-0.537991	0.590583	0.860858	Corin	corin, serine peptidase [Source:MGI Symbol;Acc:MGI:1349451]
ENSMUSG00000005225	7.14802	3.4734	3.13268	1.10876	0.267532	0.624727	Plekha8	pleckstrin homology domain containing, family A (phosphoinositide binding specific) member 8 [Source:MGI Symbol;Acc:MGI:2681164]
ENSMUSG00000005232	0	NA	NA	NA	NA	NA	G6pc2	glucose-6-phosphatase, catalytic, 2 [Source:MGI Symbol;Acc:MGI:1277193]
ENSMUSG00000005233	19.1168	-1.14522	1.81626	-0.630535	0.528345	0.831978	Spc25	SPC25, NDC80 kinetochore complex component, homolog (S. cerevisiae) [Source:MGI Symbol;Acc:MGI:1913692]
ENSMUSG00000005237	186.513	0.482864	1.68399	0.286737	0.774313	0.93147	Dnah2	dynein, axonemal, heavy chain 2 [Source:MGI Symbol;Acc:MGI:107731]
ENSMUSG00000005251	5.76499	-2.30185	1.80396	-1.276	0.201955	0.544709	Ripk4	receptor-interacting serine-threonine kinase 4 [Source:MGI Symbol;Acc:MGI:1919638]
ENSMUSG00000005262	59.4674	0.544569	1.72253	0.316145	0.751892	0.923738	Ufd1	ubiquitin recognition factor in ER-associated degradation 1 [Source:MGI Symbol;Acc:MGI:109353]
ENSMUSG00000005267	2.55479	0.167636	2.50139	0.0670172	0.946568	NA	Zfp287	zinc finger protein 287 [Source:MGI Symbol;Acc:MGI:2176561]
ENSMUSG00000005268	0	NA	NA	NA	NA	NA	Prlr	prolactin receptor [Source:MGI Symbol;Acc:MGI:97763]
ENSMUSG00000005299	12.179	0.41084	0.908602	0.452167	0.651149	0.884317	Letm1	leucine zipper-EF-hand containing transmembrane protein 1 [Source:MGI Symbol;Acc:MGI:1932557]
ENSMUSG00000005312	35.9283	-0.075275	1.74996	-0.0430154	0.965689	0.987305	Ubqln1	ubiquilin 1 [Source:MGI Symbol;Acc:MGI:1860276]
ENSMUSG00000005320	4.15751	3.44729	2.28138	1.51106	0.130774	NA	Fgfr4	fibroblast growth factor receptor 4 [Source:MGI Symbol;Acc:MGI:95525]
ENSMUSG00000005338	0	NA	NA	NA	NA	NA	Cadm3	cell adhesion molecule 3 [Source:MGI Symbol;Acc:MGI:2137858]
ENSMUSG00000005339	0	NA	NA	NA	NA	NA	Fcer1a	Fc receptor, IgE, high affinity I, alpha polypeptide [Source:MGI Symbol;Acc:MGI:95494]
ENSMUSG00000005354	9.35998	0.648822	1.9502	0.332695	0.739364	0.921039	Txn2	thioredoxin 2 [Source:MGI Symbol;Acc:MGI:1929468]
ENSMUSG00000005355	0	NA	NA	NA	NA	NA	Casp14	caspase 14 [Source:MGI Symbol;Acc:MGI:1335092]
ENSMUSG00000005357	1.48055	-2.07002	3.40136	-0.608585	0.5428	NA	Slc1a6	solute carrier family 1 (high affinity aspartate/glutamate transporter), member 6 [Source:MGI Symbol;Acc:MGI:1096331]
ENSMUSG00000005360	0.433115	1.8747	6.15661	0.304502	0.760745	NA	Slc1a3	solute carrier family 1 (glial high affinity glutamate transporter), member 3 [Source:MGI Symbol;Acc:MGI:99917]
ENSMUSG00000005362	32.0929	-1.44907	1.75834	-0.824111	0.409877	0.755583	Crbn	cereblon [Source:MGI Symbol;Acc:MGI:1913277]
ENSMUSG00000005364	0.586505	4.9556	6.16892	0.803318	0.421791	NA	Il5ra	interleukin 5 receptor, alpha [Source:MGI Symbol;Acc:MGI:96558]
ENSMUSG00000005370	64.8549	-1.63752	0.537294	-3.04771	0.00230591	0.02547	Msh6	mutS homolog 6 [Source:MGI Symbol;Acc:MGI:1343961]
ENSMUSG00000005371	15.2776	0.957098	1.93844	0.493746	0.621485	0.87415	Fbxo11	F-box protein 11 [Source:MGI Symbol;Acc:MGI:2147134]
ENSMUSG00000005373	2.11563	1.18647	3.85799	0.307535	0.758436	NA	Mlxipl	MLX interacting protein-like [Source:MGI Symbol;Acc:MGI:1927999]
ENSMUSG00000005374	51.7098	-1.32798	1.73275	-0.766398	0.44344	0.780165	Tbl2	transducin (beta)-like 2 [Source:MGI Symbol;Acc:MGI:1351652]
ENSMUSG00000005378	56.0824	-1.81831	0.533919	-3.40558	0.000660225	0.0090733	Bud23	BUD23, rRNA methyltransferase and ribosome maturation factor [Source:MGI Symbol;Acc:MGI:1913388]
ENSMUSG00000005397	9.42391	-0.474104	1.45534	-0.325768	0.7446	0.922095	Nid1	nidogen 1 [Source:MGI Symbol;Acc:MGI:97342]
ENSMUSG00000005410	56.4448	-1.69586	1.764	-0.961371	0.336366	0.693021	Mcm5	minichromosome maintenance complex component 5 [Source:MGI Symbol;Acc:MGI:103197]
ENSMUSG00000005413	6.58074	2.82231	1.4066	2.00647	0.0448057	0.23074	Hmox1	heme oxygenase 1 [Source:MGI Symbol;Acc:MGI:96163]
ENSMUSG00000005417	355.529	2.64528	0.326977	8.09011	5.96e-16	5.12e-14	Mprip	myosin phosphatase Rho interacting protein [Source:MGI Symbol;Acc:MGI:1349438]
ENSMUSG00000005442	31.9101	1.24572	1.76646	0.705207	0.480681	0.803474	Cic	capicua transcriptional repressor [Source:MGI Symbol;Acc:MGI:1918972]
ENSMUSG00000005447	2.6647	-0.0486598	2.80212	-0.0173654	0.986145	NA	Pafah1b3	platelet-activating factor acetylhydrolase, isoform 1b, subunit 3 [Source:MGI Symbol;Acc:MGI:108414]
ENSMUSG00000005465	0.116264	1.28586	6.22954	0.206413	0.836469	NA	Il27ra	interleukin 27 receptor, alpha [Source:MGI Symbol;Acc:MGI:1355318]
ENSMUSG00000005469	95.3602	-0.946167	0.371429	-2.54737	0.0108538	0.0856613	Prkaca	protein kinase, cAMP dependent, catalytic, alpha [Source:MGI Symbol;Acc:MGI:97592]
ENSMUSG00000005470	43.8051	-0.905401	0.532506	-1.70027	0.089081	0.354121	Asf1b	anti-silencing function 1B histone chaperone [Source:MGI Symbol;Acc:MGI:1914179]
ENSMUSG00000005474	31.3158	-1.49833	1.83513	-0.81647	0.414232	0.758876	Myl10	myosin, light chain 10, regulatory [Source:MGI Symbol;Acc:MGI:1891705]
ENSMUSG00000005481	25.1203	0.787608	1.08249	0.72759	0.466865	0.792985	Ddx39a	DEAD box helicase 39a [Source:MGI Symbol;Acc:MGI:1915528]
ENSMUSG00000005483	163.412	0.859862	0.337513	2.54764	0.0108455	0.0856613	Dnajb1	DnaJ heat shock protein family (Hsp40) member B1 [Source:MGI Symbol;Acc:MGI:1931874]
ENSMUSG00000005493	16.4031	-0.71588	1.8611	-0.384655	0.700493	0.905308	Msh4	mutS homolog 4 [Source:MGI Symbol;Acc:MGI:1860077]
ENSMUSG00000005501	8.41951	-0.296364	1.98905	-0.148998	0.881555	0.963342	Usp40	ubiquitin specific peptidase 40 [Source:MGI Symbol;Acc:MGI:2443184]
ENSMUSG00000005503	0	NA	NA	NA	NA	NA	Evx1	even-skipped homeobox 1 [Source:MGI Symbol;Acc:MGI:95461]
ENSMUSG00000005505	13.1507	-0.0590143	2.0407	-0.0289186	0.97693	0.992251	Kbtbd4	kelch repeat and BTB (POZ) domain containing 4 [Source:MGI Symbol;Acc:MGI:1914386]
ENSMUSG00000005506	10.2754	0.392169	2.0564	0.190706	0.848756	0.955426	Celf1	CUGBP, Elav-like family member 1 [Source:MGI Symbol;Acc:MGI:1342295]
ENSMUSG00000005510	13.6935	-1.13013	0.936435	-1.20684	0.227495	0.576666	Ndufs3	NADH:ubiquinone oxidoreductase core subunit S3 [Source:MGI Symbol;Acc:MGI:1915599]
ENSMUSG00000005514	13.1386	-3.15125	1.99223	-1.58177	0.113702	0.408166	Por	cytochrome p450 oxidoreductase [Source:MGI Symbol;Acc:MGI:97744]
ENSMUSG00000005533	13.5005	-1.95063	1.22004	-1.59882	0.10986	0.399512	Igf1r	insulin-like growth factor I receptor [Source:MGI Symbol;Acc:MGI:96433]
ENSMUSG00000005534	22.7145	1.63313	0.887594	1.83995	0.0657751	0.296851	Insr	insulin receptor [Source:MGI Symbol;Acc:MGI:96575]
ENSMUSG00000005540	0.452491	4.6667	6.17691	0.755506	0.449945	NA	Fcer2a	Fc receptor, IgE, low affinity II, alpha polypeptide [Source:MGI Symbol;Acc:MGI:95497]
ENSMUSG00000005547	0	NA	NA	NA	NA	NA	Cyp2a5	cytochrome P450, family 2, subfamily a, polypeptide 5 [Source:MGI Symbol;Acc:MGI:88597]
ENSMUSG00000005553	0	NA	NA	NA	NA	NA	Atp4a	ATPase, H+/K+ exchanging, gastric, alpha polypeptide [Source:MGI Symbol;Acc:MGI:88113]
ENSMUSG00000005566	237.484	-0.25816	0.326096	-0.79167	0.428553	0.768001	Trim28	tripartite motif-containing 28 [Source:MGI Symbol;Acc:MGI:109274]
ENSMUSG00000005575	41.6505	2.60717	0.838128	3.11071	0.0018664	0.0216525	Ube2m	ubiquitin-conjugating enzyme E2M [Source:MGI Symbol;Acc:MGI:108278]
ENSMUSG00000005580	1.87569	1.58681	5.29995	0.299402	0.764634	NA	Adcy9	adenylate cyclase 9 [Source:MGI Symbol;Acc:MGI:108450]
ENSMUSG00000005583	1.73855	0.64673	5.47737	0.118073	0.90601	NA	Mef2c	myocyte enhancer factor 2C [Source:MGI Symbol;Acc:MGI:99458]
ENSMUSG00000005609	124.186	-1.0333	0.405479	-2.54834	0.0108238	0.0856613	Ctr9	CTR9 homolog, Paf1/RNA polymerase II complex component [Source:MGI Symbol;Acc:MGI:109345]
ENSMUSG00000005610	158.489	0.0387797	1.37056	0.0282947	0.977427	0.992544	Eif4g2	eukaryotic translation initiation factor 4, gamma 2 [Source:MGI Symbol;Acc:MGI:109207]
ENSMUSG00000005611	0.514654	-0.446223	6.09568	-0.0732032	0.941644	NA	Irag1	inositol 1,4,5-triphosphate receptor associated 1 [Source:MGI Symbol;Acc:MGI:1338023]
ENSMUSG00000005615	71.5056	1.38264	1.10538	1.25083	0.210997	0.559406	Pcyt1a	phosphate cytidylyltransferase 1, choline, alpha isoform [Source:MGI Symbol;Acc:MGI:88557]
ENSMUSG00000005621	66.5358	2.08837	0.462693	4.51351	6.38e-06	0.000148493	Zfp592	zinc finger protein 592 [Source:MGI Symbol;Acc:MGI:2443541]
ENSMUSG00000005625	130.114	-0.557609	1.69998	-0.328009	0.742905	0.921681	Psmd4	proteasome (prosome, macropain) 26S subunit, non-ATPase, 4 [Source:MGI Symbol;Acc:MGI:1201670]
ENSMUSG00000005628	1.73961	2.72721	5.4465	0.500728	0.616563	NA	Tmod4	tropomodulin 4 [Source:MGI Symbol;Acc:MGI:1355285]
ENSMUSG00000005640	0.222	3.58466	6.21502	0.576774	0.564092	NA	Insrr	insulin receptor-related receptor [Source:MGI Symbol;Acc:MGI:1346037]
ENSMUSG00000005649	0.111	3.12292	6.22788	0.501441	0.616061	NA	Cabp5	calcium binding protein 5 [Source:MGI Symbol;Acc:MGI:1352746]
ENSMUSG00000005656	9.4805	2.54755	1.60579	1.58648	0.112631	0.405223	Snx6	sorting nexin 6 [Source:MGI Symbol;Acc:MGI:1919433]
ENSMUSG00000005667	11.5513	0.119009	1.58518	0.0750759	0.940154	0.980927	Mthfd2	methylenetetrahydrofolate dehydrogenase (NAD+ dependent), methenyltetrahydrofolate cyclohydrolase [Source:MGI Symbol;Acc:MGI:1338850]
ENSMUSG00000005672	13.8341	-2.30861	1.93177	-1.19508	0.232056	0.582296	Kit	KIT proto-oncogene receptor tyrosine kinase [Source:MGI Symbol;Acc:MGI:96677]
ENSMUSG00000005674	0.36166	-1.66653	6.14473	-0.271213	0.786228	NA	Tomm40l	translocase of outer mitochondrial membrane 40-like [Source:MGI Symbol;Acc:MGI:3589112]
ENSMUSG00000005677	0	NA	NA	NA	NA	NA	Nr1i3	nuclear receptor subfamily 1, group I, member 3 [Source:MGI Symbol;Acc:MGI:1346307]
ENSMUSG00000005681	0	NA	NA	NA	NA	NA	Apoa2	apolipoprotein A-II [Source:MGI Symbol;Acc:MGI:88050]
ENSMUSG00000005682	8.77602	-0.99483	2.11772	-0.469763	0.638524	0.879588	Pan2	PAN2 poly(A) specific ribonuclease subunit [Source:MGI Symbol;Acc:MGI:1918984]
ENSMUSG00000005683	75.588	-0.954385	0.535153	-1.78339	0.0745234	0.31941	Cs	citrate synthase [Source:MGI Symbol;Acc:MGI:88529]
ENSMUSG00000005686	7.36615	4.0472	2.17524	1.86058	0.0628037	0.287685	Ampd3	adenosine monophosphate deaminase 3 [Source:MGI Symbol;Acc:MGI:1096344]
ENSMUSG00000005687	71.8601	-1.38082	1.71956	-0.803008	0.42197	0.764219	Bcas2	BCAS2 pre-mRNA processing factor [Source:MGI Symbol;Acc:MGI:1915433]
ENSMUSG00000005696	0.0920659	3.16027	6.23148	0.507147	0.612052	NA	Sh2d1a	SH2 domain containing 1A [Source:MGI Symbol;Acc:MGI:1328352]
ENSMUSG00000005698	15.2998	0.194119	0.99287	0.195513	0.844991	0.953388	Ctcf	CCCTC-binding factor [Source:MGI Symbol;Acc:MGI:109447]
ENSMUSG00000005699	23.4568	0.746255	1.77893	0.419498	0.674852	0.896055	Pard6a	par-6 family cell polarity regulator alpha [Source:MGI Symbol;Acc:MGI:1927223]
ENSMUSG00000005705	0	NA	NA	NA	NA	NA	Agrp	agouti related neuropeptide [Source:MGI Symbol;Acc:MGI:892013]
ENSMUSG00000005716	0	NA	NA	NA	NA	NA	Pvalb	parvalbumin [Source:MGI Symbol;Acc:MGI:97821]
ENSMUSG00000005718	0.765226	0.973201	6.14062	0.158486	0.874074	NA	Tfap4	transcription factor AP4 [Source:MGI Symbol;Acc:MGI:103239]
ENSMUSG00000005732	20.5004	0.629537	1.92138	0.327648	0.743178	0.921681	Ranbp1	RAN binding protein 1 [Source:MGI Symbol;Acc:MGI:96269]
ENSMUSG00000005763	2.00707	4.99893	3.41602	1.46338	0.143363	NA	Cd247	CD247 antigen [Source:MGI Symbol;Acc:MGI:88334]
ENSMUSG00000005774	2.0431	-1.79192	5.44757	-0.328938	0.742202	NA	Rfx5	regulatory factor X, 5 (influences HLA class II expression) [Source:MGI Symbol;Acc:MGI:1858421]
ENSMUSG00000005779	87.0691	-1.66703	0.886002	-1.88152	0.0599007	0.280904	Psmb4	proteasome (prosome, macropain) subunit, beta type 4 [Source:MGI Symbol;Acc:MGI:1098257]
ENSMUSG00000005800	0.38699	4.28712	6.19627	0.691888	0.489008	NA	Mmp8	matrix metallopeptidase 8 [Source:MGI Symbol;Acc:MGI:1202395]
ENSMUSG00000005802	68.229	4.8135	0.703431	6.84289	7.76e-12	4.6e-10	Slc30a4	solute carrier family 30 (zinc transporter), member 4 [Source:MGI Symbol;Acc:MGI:1345282]
ENSMUSG00000005803	132.042	1.85621	1.69902	1.09252	0.274604	0.631301	Sqor	sulfide quinone oxidoreductase [Source:MGI Symbol;Acc:MGI:1929899]
ENSMUSG00000005804	3.18011	-0.831421	2.60104	-0.319649	0.749235	NA	Bloc1s6	biogenesis of lysosomal organelles complex-1, subunit 6, pallidin [Source:MGI Symbol;Acc:MGI:1927580]
ENSMUSG00000005813	13.854	0.302054	1.0413	0.290074	0.771759	0.930608	Metap1	methionyl aminopeptidase 1 [Source:MGI Symbol;Acc:MGI:1922874]
ENSMUSG00000005823	15.108	-0.584104	1.95101	-0.299385	0.764646	0.929028	Gpr108	G protein-coupled receptor 108 [Source:MGI Symbol;Acc:MGI:1925558]
ENSMUSG00000005824	2.26133	2.65814	3.17203	0.837992	0.402035	NA	Tnfsf14	tumor necrosis factor (ligand) superfamily, member 14 [Source:MGI Symbol;Acc:MGI:1355317]
ENSMUSG00000005836	4.02172	1.93243	2.49178	0.77552	0.438032	NA	Gata6	GATA binding protein 6 [Source:MGI Symbol;Acc:MGI:107516]
ENSMUSG00000005846	24.8397	-1.10153	0.863323	-1.27592	0.201983	0.544709	Rsl1d1	ribosomal L1 domain containing 1 [Source:MGI Symbol;Acc:MGI:1913659]
ENSMUSG00000005864	0	NA	NA	NA	NA	NA	Cnga2	cyclic nucleotide gated channel alpha 2 [Source:MGI Symbol;Acc:MGI:108040]
ENSMUSG00000005871	7.65263	-0.260382	1.95198	-0.133394	0.893882	0.966922	Apc	APC, WNT signaling pathway regulator [Source:MGI Symbol;Acc:MGI:88039]
ENSMUSG00000005873	4.39235	-2.97987	1.79916	-1.65626	0.0976693	NA	Reep5	receptor accessory protein 5 [Source:MGI Symbol;Acc:MGI:1270152]
ENSMUSG00000005881	80.3686	1.07336	1.72344	0.622804	0.533413	0.834727	Ergic3	ERGIC and golgi 3 [Source:MGI Symbol;Acc:MGI:1913616]
ENSMUSG00000005882	16.4313	1.24709	1.88816	0.660479	0.508947	0.818661	Uqcc1	ubiquinol-cytochrome c reductase complex assembly factor 1 [Source:MGI Symbol;Acc:MGI:1929472]
ENSMUSG00000005883	19.0412	-0.957581	1.86334	-0.513906	0.607318	0.868474	Spo11	SPO11 initiator of meiotic double stranded breaks [Source:MGI Symbol;Acc:MGI:1349669]
ENSMUSG00000005886	48.6602	0.443793	1.73835	0.255295	0.798495	0.938067	Ncoa2	nuclear receptor coactivator 2 [Source:MGI Symbol;Acc:MGI:1276533]
ENSMUSG00000005891	0.626252	5.10828	6.16903	0.828052	0.407641	NA	Prl4a1	prolactin family 4, subfamily a, member 1 [Source:MGI Symbol;Acc:MGI:1206587]
ENSMUSG00000005892	6.11552	-4.36089	2.01572	-2.16344	0.0305071	0.176647	Trh	thyrotropin releasing hormone [Source:MGI Symbol;Acc:MGI:98823]
ENSMUSG00000005893	67.0209	1.21894	0.566041	2.15346	0.0312829	0.179836	Nr2c2	nuclear receptor subfamily 2, group C, member 2 [Source:MGI Symbol;Acc:MGI:1352466]
ENSMUSG00000005897	15.3676	-2.72648	2.07445	-1.31431	0.188741	0.529382	Nr2c1	nuclear receptor subfamily 2, group C, member 1 [Source:MGI Symbol;Acc:MGI:1352465]
ENSMUSG00000005899	36.4788	1.08814	1.81272	0.60028	0.54832	0.842301	Smpd4	sphingomyelin phosphodiesterase 4 [Source:MGI Symbol;Acc:MGI:1924876]
ENSMUSG00000005907	4.39427	-1.21253	3.29638	-0.367836	0.712995	NA	Pex1	peroxisomal biogenesis factor 1 [Source:MGI Symbol;Acc:MGI:1918632]
ENSMUSG00000005917	0	NA	NA	NA	NA	NA	Otx1	orthodenticle homeobox 1 [Source:MGI Symbol;Acc:MGI:97450]
ENSMUSG00000005936	11.6157	-0.965354	2.01689	-0.478636	0.632198	0.878577	Kctd20	potassium channel tetramerisation domain containing 20 [Source:MGI Symbol;Acc:MGI:1914239]
ENSMUSG00000005947	147.883	0.3429	0.384882	0.890923	0.372971	0.723935	Itgae	integrin alpha E, epithelial-associated [Source:MGI Symbol;Acc:MGI:1298377]
ENSMUSG00000005949	3.1978	1.8178	2.52883	0.718833	0.472244	NA	Ctns	cystinosis, nephropathic [Source:MGI Symbol;Acc:MGI:1932872]
ENSMUSG00000005950	2.56563	-1.69419	3.19273	-0.530639	0.595669	NA	P2rx5	purinergic receptor P2X, ligand-gated ion channel, 5 [Source:MGI Symbol;Acc:MGI:2137026]
ENSMUSG00000005951	0.860467	-1.074	6.09365	-0.176249	0.860098	NA	Shpk	sedoheptulokinase [Source:MGI Symbol;Acc:MGI:1921887]
ENSMUSG00000005952	1.74063	1.45525	4.18216	0.347967	0.727865	NA	Trpv1	transient receptor potential cation channel, subfamily V, member 1 [Source:MGI Symbol;Acc:MGI:1341787]
ENSMUSG00000005958	1.91928	7.63814	4.10698	1.8598	0.0629145	NA	Ephb3	Eph receptor B3 [Source:MGI Symbol;Acc:MGI:104770]
ENSMUSG00000005968	8.54166	-0.059067	2.13009	-0.0277298	0.977878	0.992748	Tuft1	tuftelin 1 [Source:MGI Symbol;Acc:MGI:109572]
ENSMUSG00000005973	0.672624	-0.841656	6.12248	-0.13747	0.890659	NA	Rcn1	reticulocalbin 1 [Source:MGI Symbol;Acc:MGI:104559]
ENSMUSG00000005980	0	NA	NA	NA	NA	NA	Dnase1	deoxyribonuclease I [Source:MGI Symbol;Acc:MGI:103157]
ENSMUSG00000005981	115.439	-0.957838	0.326201	-2.93634	0.00332106	0.0337684	Trap1	TNF receptor-associated protein 1 [Source:MGI Symbol;Acc:MGI:1915265]
ENSMUSG00000005982	14.6908	2.09924	1.8892	1.11118	0.266492	0.623374	Naa60	N(alpha)-acetyltransferase 60, NatF catalytic subunit [Source:MGI Symbol;Acc:MGI:1922013]
ENSMUSG00000005983	116.181	0.546942	0.347755	1.57278	0.11577	0.411522	1700037C18Rik	RIKEN cDNA 1700037C18 gene [Source:MGI Symbol;Acc:MGI:1920511]
ENSMUSG00000005986	0.48825	-3.66603	6.13098	-0.597951	0.549873	NA	Ankrd13d	ankyrin repeat domain 13 family, member D [Source:MGI Symbol;Acc:MGI:1915673]
ENSMUSG00000005994	0	NA	NA	NA	NA	NA	Tyrp1	tyrosinase-related protein 1 [Source:MGI Symbol;Acc:MGI:98881]
ENSMUSG00000006005	109.575	-0.876857	1.6947	-0.517412	0.604868	0.867571	Tpr	translocated promoter region, nuclear basket protein [Source:MGI Symbol;Acc:MGI:1922066]
ENSMUSG00000006007	0	NA	NA	NA	NA	NA	Pdc	phosducin [Source:MGI Symbol;Acc:MGI:98090]
ENSMUSG00000006010	3.05317	-1.24729	3.50674	-0.355682	0.722078	NA	Odr4	odr4 GPCR localization factor homolog [Source:MGI Symbol;Acc:MGI:2385108]
ENSMUSG00000006014	0.54098	-3.32706	6.12726	-0.542994	0.587134	NA	Prg4	proteoglycan 4 (megakaryocyte stimulating factor, articular superficial zone protein) [Source:MGI Symbol;Acc:MGI:1891344]
ENSMUSG00000006019	19.827	1.25305	1.8131	0.69111	0.489496	0.809394	Dhx34	DExH-box helicase 34 [Source:MGI Symbol;Acc:MGI:1918973]
ENSMUSG00000006021	2.81204	-1.17933	3.80245	-0.310151	0.756446	NA	Kptn	kaptin [Source:MGI Symbol;Acc:MGI:1890380]
ENSMUSG00000006024	40.0605	-0.000755187	0.527285	-0.00143222	0.998857	0.999489	Napa	N-ethylmaleimide sensitive fusion protein attachment protein alpha [Source:MGI Symbol;Acc:MGI:104563]
ENSMUSG00000006050	15.3606	-0.816621	1.93984	-0.420974	0.673774	0.895619	Sra1	steroid receptor RNA activator 1 [Source:MGI Symbol;Acc:MGI:1344414]
ENSMUSG00000006056	0.285242	-1.31688	6.1518	-0.214064	0.830497	NA	Calcoco2	calcium binding and coiled-coil domain 2 [Source:MGI Symbol;Acc:MGI:1343177]
ENSMUSG00000006057	0.268524	2.20503	6.23208	0.35382	0.723474	NA	Atp5mc1	ATP synthase membrane subunit c locus 1 [Source:MGI Symbol;Acc:MGI:107653]
ENSMUSG00000006058	4.2118	0.630652	3.82843	0.164729	0.869158	NA	Snf8	SNF8, ESCRT-II complex subunit, homolog (S. cerevisiae) [Source:MGI Symbol;Acc:MGI:1343161]
ENSMUSG00000006095	70.7921	-1.36196	0.5439	-2.50406	0.0122778	0.0933768	Tbcb	tubulin folding cofactor B [Source:MGI Symbol;Acc:MGI:1913661]
ENSMUSG00000006127	15.9422	-0.861064	1.45835	-0.590439	0.554897	0.845127	Inpp5k	inositol polyphosphate 5-phosphatase K [Source:MGI Symbol;Acc:MGI:1194899]
ENSMUSG00000006134	15.2315	0.120063	1.26897	0.0946145	0.924621	0.976138	Crkl	v-crk avian sarcoma virus CT10 oncogene homolog-like [Source:MGI Symbol;Acc:MGI:104686]
ENSMUSG00000006143	6.55167	1.45038	2.07927	0.697544	0.485463	0.807894	Upk3bl	uroplakin 3B-like [Source:MGI Symbol;Acc:MGI:1916915]
ENSMUSG00000006154	0	NA	NA	NA	NA	NA	Eps8l1	EPS8-like 1 [Source:MGI Symbol;Acc:MGI:1914675]
ENSMUSG00000006169	38.7625	0.239674	1.73329	0.138277	0.890021	0.966498	Clint1	clathrin interactor 1 [Source:MGI Symbol;Acc:MGI:2144243]
ENSMUSG00000006179	0.675516	3.47902	6.18567	0.562432	0.573821	NA	Prss16	serine protease 16 (thymus) [Source:MGI Symbol;Acc:MGI:1859181]
ENSMUSG00000006191	26.5721	0.631255	0.628676	1.0041	0.315329	0.673133	Cdkal1	CDK5 regulatory subunit associated protein 1-like 1 [Source:MGI Symbol;Acc:MGI:1921765]
ENSMUSG00000006200	0.285242	-1.31688	6.1518	-0.214064	0.830497	NA	Rhox6	reproductive homeobox 6 [Source:MGI Symbol;Acc:MGI:1202888]
ENSMUSG00000006204	0.631492	-0.183679	6.09536	-0.0301343	0.97596	NA	Cdcp3	CUB domain containing protein 3 [Source:MGI Symbol;Acc:MGI:1918645]
ENSMUSG00000006205	1.24085	-4.46348	6.12353	-0.728906	0.466059	NA	Htra1	HtrA serine peptidase 1 [Source:MGI Symbol;Acc:MGI:1929076]
ENSMUSG00000006215	9.34483	-2.61749	1.61008	-1.62569	0.104016	0.387804	Zbtb17	zinc finger and BTB domain containing 17 [Source:MGI Symbol;Acc:MGI:107410]
ENSMUSG00000006216	0	NA	NA	NA	NA	NA	Clcnkb	chloride channel, voltage-sensitive Kb [Source:MGI Symbol;Acc:MGI:1930643]
ENSMUSG00000006218	4.49702	3.15139	2.48969	1.26578	0.205594	NA	Fam131c	family with sequence similarity 131, member C [Source:MGI Symbol;Acc:MGI:2685539]
ENSMUSG00000006219	0	NA	NA	NA	NA	NA	Fblim1	filamin binding LIM protein 1 [Source:MGI Symbol;Acc:MGI:1921452]
ENSMUSG00000006221	44.5632	-1.13591	0.679953	-1.67057	0.0948068	0.364983	Hspb7	heat shock protein family, member 7 (cardiovascular) [Source:MGI Symbol;Acc:MGI:1352494]
ENSMUSG00000006235	3.19462	0.818647	3.63015	0.225514	0.82158	NA	Epor	erythropoietin receptor [Source:MGI Symbol;Acc:MGI:95408]
ENSMUSG00000006241	63.7292	0.64377	0.576336	1.117	0.263993	0.6199	Ccdc159	coiled-coil domain containing 159 [Source:MGI Symbol;Acc:MGI:1914369]
ENSMUSG00000006262	4.97099	0.598177	2.32837	0.256908	0.79725	0.938067	Mob1b	MOB kinase activator 1B [Source:MGI Symbol;Acc:MGI:1915723]
ENSMUSG00000006269	8.75123	-0.2294	1.51903	-0.151017	0.879962	0.963085	Atp6v1b1	ATPase, H+ transporting, lysosomal V1 subunit B1 [Source:MGI Symbol;Acc:MGI:103285]
ENSMUSG00000006270	1.38694	16.88	5.88421	2.8687	0.00412159	NA	Vax1	ventral anterior homeobox 1 [Source:MGI Symbol;Acc:MGI:1277163]
ENSMUSG00000006273	45.8708	-1.76836	0.657071	-2.69128	0.00711795	0.0619036	Atp6v1b2	ATPase, H+ transporting, lysosomal V1 subunit B2 [Source:MGI Symbol;Acc:MGI:109618]
ENSMUSG00000006276	6.4506	0.583179	2.14556	0.271808	0.78577	0.935739	Eps15l1	epidermal growth factor receptor pathway substrate 15-like 1 [Source:MGI Symbol;Acc:MGI:104582]
ENSMUSG00000006281	25.9445	0.797895	0.691473	1.15391	0.248538	0.602617	Tep1	telomerase associated protein 1 [Source:MGI Symbol;Acc:MGI:109573]
ENSMUSG00000006288	3.43427	-3.06121	2.53232	-1.20885	0.226719	NA	Ttc5	tetratricopeptide repeat domain 5 [Source:MGI Symbol;Acc:MGI:2683584]
ENSMUSG00000006289	6.84464	-1.85723	2.28484	-0.812851	0.416304	0.759957	Osgep	O-sialoglycoprotein endopeptidase [Source:MGI Symbol;Acc:MGI:1913496]
ENSMUSG00000006299	235.333	1.82656	0.587847	3.10721	0.00188862	0.0218835	Aamp	angio-associated migratory protein [Source:MGI Symbol;Acc:MGI:107809]
ENSMUSG00000006301	1.0331	-0.120381	4.80092	-0.0250745	0.979996	NA	Tmbim1	transmembrane BAX inhibitor motif containing 1 [Source:MGI Symbol;Acc:MGI:1916910]
ENSMUSG00000006304	53.6839	-0.33518	1.7217	-0.19468	0.845644	0.953669	Arpc2	actin related protein 2/3 complex, subunit 2 [Source:MGI Symbol;Acc:MGI:1923959]
ENSMUSG00000006307	24.0278	-0.044542	1.78581	-0.0249421	0.980101	0.993613	Kmt2b	lysine (K)-specific methyltransferase 2B [Source:MGI Symbol;Acc:MGI:109565]
ENSMUSG00000006310	10.1004	0.575023	1.9755	0.291077	0.770993	0.930608	Zbtb32	zinc finger and BTB domain containing 32 [Source:MGI Symbol;Acc:MGI:1891838]
ENSMUSG00000006311	10.1137	1.07534	1.59563	0.673932	0.500355	0.815468	Etv2	ets variant 2 [Source:MGI Symbol;Acc:MGI:99253]
ENSMUSG00000006313	0.61226	1.99105	6.18355	0.321992	0.747459	NA	Upk1a	uroplakin 1A [Source:MGI Symbol;Acc:MGI:98911]
ENSMUSG00000006315	7.19829	1.3663	2.03429	0.671636	0.501816	0.815761	Tmem147	transmembrane protein 147 [Source:MGI Symbol;Acc:MGI:1915011]
ENSMUSG00000006333	47.3764	0.280138	1.73614	0.161357	0.871812	0.962229	Rps9	ribosomal protein S9 [Source:MGI Symbol;Acc:MGI:1924096]
ENSMUSG00000006335	7.36136	-1.17001	2.05745	-0.568672	0.569579	0.852697	Tfpt	TCF3 (E2A) fusion partner [Source:MGI Symbol;Acc:MGI:1916964]
ENSMUSG00000006342	2.39439	-3.63401	4.52366	-0.803334	0.421782	NA	Susd2	sushi domain containing 2 [Source:MGI Symbol;Acc:MGI:1918983]
ENSMUSG00000006344	3.27217	1.86562	2.21593	0.841913	0.399837	NA	Ggt5	gamma-glutamyltransferase 5 [Source:MGI Symbol;Acc:MGI:1346063]
ENSMUSG00000006345	0.896432	7.16735	6.09229	1.17646	0.23941	NA	Ggt1	gamma-glutamyltransferase 1 [Source:MGI Symbol;Acc:MGI:95706]
ENSMUSG00000006356	47.7648	2.49947	0.604485	4.13487	3.55e-05	0.000712624	Crip2	cysteine rich protein 2 [Source:MGI Symbol;Acc:MGI:1915587]
ENSMUSG00000006360	2.77706	-0.85475	3.56548	-0.239729	0.81054	NA	Crip1	cysteine-rich protein 1 [Source:MGI Symbol;Acc:MGI:88501]
ENSMUSG00000006362	0.276198	3.93176	6.2108	0.633051	0.5267	NA	Cbfa2t3	CBFA2/RUNX1 translocation partner 3 [Source:MGI Symbol;Acc:MGI:1338013]
ENSMUSG00000006369	5.27989	-2.62566	2.75244	-0.95394	0.340114	0.695303	Fbln1	fibulin 1 [Source:MGI Symbol;Acc:MGI:95487]
ENSMUSG00000006373	38.9495	-1.52961	0.647511	-2.36229	0.0181624	0.123277	Pgrmc1	progesterone receptor membrane component 1 [Source:MGI Symbol;Acc:MGI:1858305]
ENSMUSG00000006378	0.913288	2.78734	3.93115	0.70904	0.4783	NA	Gcat	glycine C-acetyltransferase (2-amino-3-ketobutyrate-coenzyme A ligase) [Source:MGI Symbol;Acc:MGI:1349389]
ENSMUSG00000006386	0	NA	NA	NA	NA	NA	Tek	TEK receptor tyrosine kinase [Source:MGI Symbol;Acc:MGI:98664]
ENSMUSG00000006389	0	NA	NA	NA	NA	NA	Mpl	myeloproliferative leukemia virus oncogene [Source:MGI Symbol;Acc:MGI:97076]
ENSMUSG00000006390	18.9376	-0.867339	1.72419	-0.503043	0.614934	0.870741	Elovl1	ELOVL fatty acid elongase 1 [Source:MGI Symbol;Acc:MGI:1858959]
ENSMUSG00000006392	14.6883	-0.594272	1.85193	-0.320893	0.748291	0.922824	Med8	mediator complex subunit 8 [Source:MGI Symbol;Acc:MGI:1915269]
ENSMUSG00000006395	0	NA	NA	NA	NA	NA	Hyi	hydroxypyruvate isomerase (putative) [Source:MGI Symbol;Acc:MGI:1915430]
ENSMUSG00000006398	118.329	-0.94014	0.447835	-2.0993	0.0357906	0.198243	Cdc20	cell division cycle 20 [Source:MGI Symbol;Acc:MGI:1859866]
ENSMUSG00000006403	0	NA	NA	NA	NA	NA	Adamts4	ADAM metallopeptidase with thrombospondin type 1 motif 4 [Source:MGI Symbol;Acc:MGI:1339949]
ENSMUSG00000006411	9.24122	3.89733	1.16053	3.35823	0.000784434	0.0105653	Nectin4	nectin cell adhesion molecule 4 [Source:MGI Symbol;Acc:MGI:1918990]
ENSMUSG00000006412	21.1853	1.82297	1.71236	1.06459	0.28706	0.643928	Pfdn2	prefoldin 2 [Source:MGI Symbol;Acc:MGI:1276111]
ENSMUSG00000006418	12.8271	-1.00999	1.09928	-0.91877	0.358216	0.711092	Rnf114	ring finger protein 114 [Source:MGI Symbol;Acc:MGI:1933159]
ENSMUSG00000006423	0	NA	NA	NA	NA	NA	Steep1	STING1 ER exit protein 1 [Source:MGI Symbol;Acc:MGI:1924894]
ENSMUSG00000006435	67.8461	5.26009	1.74003	3.02299	0.00250291	0.0271077	Neurl1a	neuralized E3 ubiquitin protein ligase 1A [Source:MGI Symbol;Acc:MGI:1334263]
ENSMUSG00000006442	1.34629	-1.28611	3.84856	-0.33418	0.738243	NA	Srm	spermidine synthase [Source:MGI Symbol;Acc:MGI:102690]
ENSMUSG00000006445	11.0857	0.393935	1.93403	0.203686	0.838599	0.951056	Epha2	Eph receptor A2 [Source:MGI Symbol;Acc:MGI:95278]
ENSMUSG00000006456	26.2218	-1.13565	1.22256	-0.928918	0.352932	0.706078	Rbm14	RNA binding motif protein 14 [Source:MGI Symbol;Acc:MGI:1929092]
ENSMUSG00000006457	5.61178	6.73161	1.87621	3.58788	0.000333383	0.00505696	Actn3	actinin alpha 3 [Source:MGI Symbol;Acc:MGI:99678]
ENSMUSG00000006463	0.87057	6.09566	6.095	1.00011	0.317259	NA	Zdhhc24	zinc finger, DHHC domain containing 24 [Source:MGI Symbol;Acc:MGI:1917855]
ENSMUSG00000006464	26.3133	-1.55481	1.10911	-1.40186	0.160957	0.488027	Bbs1	Bardet-Biedl syndrome 1 [Source:MGI Symbol;Acc:MGI:1277215]
ENSMUSG00000006469	36.6528	3.13612	1.75671	1.78523	0.0742238	0.318994	Slc34a3	solute carrier family 34 (sodium phosphate), member 3 [Source:MGI Symbol;Acc:MGI:2159410]
ENSMUSG00000006471	1.21202	-1.78747	6.08675	-0.293666	0.769013	NA	Ndor1	NADPH dependent diflavin oxidoreductase 1 [Source:MGI Symbol;Acc:MGI:1926047]
ENSMUSG00000006476	13.0145	-0.111323	2.2373	-0.049758	0.960315	0.985861	Nsmf	NMDA receptor synaptonuclear signaling and neuronal migration factor [Source:MGI Symbol;Acc:MGI:1861755]
ENSMUSG00000006488	0	NA	NA	NA	NA	NA	Prl7a1	prolactin family 7, subfamily a, member 1 [Source:MGI Symbol;Acc:MGI:1206572]
ENSMUSG00000006490	0	NA	NA	NA	NA	NA	Prl8a9	prolactin family8, subfamily a, member 9 [Source:MGI Symbol;Acc:MGI:1914560]
ENSMUSG00000006494	1.1826	6.24636	6.14104	1.01715	0.309083	NA	Pdk1	pyruvate dehydrogenase kinase, isoenzyme 1 [Source:MGI Symbol;Acc:MGI:1926119]
ENSMUSG00000006498	19.5154	-1.02099	1.94014	-0.526248	0.598716	0.864122	Ptbp1	polypyrimidine tract binding protein 1 [Source:MGI Symbol;Acc:MGI:97791]
ENSMUSG00000006517	0.489385	-1.25223	6.11555	-0.204761	0.837759	NA	Mvd	mevalonate (diphospho) decarboxylase [Source:MGI Symbol;Acc:MGI:2179327]
ENSMUSG00000006519	1.89579	-1.66533	3.70469	-0.449519	0.653057	NA	Cyba	cytochrome b-245, alpha polypeptide [Source:MGI Symbol;Acc:MGI:1316658]
ENSMUSG00000006522	1.03189	8.39214	6.09502	1.37688	0.168548	NA	Itih3	inter-alpha trypsin inhibitor, heavy chain 3 [Source:MGI Symbol;Acc:MGI:96620]
ENSMUSG00000006526	0.431341	0.750998	6.13607	0.122391	0.90259	NA	Stimate	STIM activating enhancer [Source:MGI Symbol;Acc:MGI:1921500]
ENSMUSG00000006527	76.3033	-0.084391	0.410602	-0.20553	0.837158	0.950644	Sfmbt1	Scm-like with four mbt domains 1 [Source:MGI Symbol;Acc:MGI:1859609]
ENSMUSG00000006529	0	NA	NA	NA	NA	NA	Itih1	inter-alpha trypsin inhibitor, heavy chain 1 [Source:MGI Symbol;Acc:MGI:96618]
ENSMUSG00000006538	0.1765	3.17449	6.23278	0.509321	0.610527	NA	Ihh	Indian hedgehog [Source:MGI Symbol;Acc:MGI:96533]
ENSMUSG00000006542	0.412399	-0.668436	6.17349	-0.108275	0.913777	NA	Prkag3	protein kinase, AMP-activated, gamma 3 non-catalytic subunit [Source:MGI Symbol;Acc:MGI:1891343]
ENSMUSG00000006546	0.479734	-1.16286	6.13739	-0.189471	0.849724	NA	Cryba2	crystallin, beta A2 [Source:MGI Symbol;Acc:MGI:104336]
ENSMUSG00000006567	11.1398	2.1313	0.869848	2.45019	0.014278	0.103733	Atp7b	ATPase, Cu++ transporting, beta polypeptide [Source:MGI Symbol;Acc:MGI:103297]
ENSMUSG00000006570	0	NA	NA	NA	NA	NA	Defb2	defensin beta 2 [Source:MGI Symbol;Acc:MGI:1338754]
ENSMUSG00000006574	55.3829	-1.09325	1.55397	-0.703517	0.481734	0.804449	Slc4a1	solute carrier family 4 (anion exchanger), member 1 [Source:MGI Symbol;Acc:MGI:109393]
ENSMUSG00000006575	49.9592	4.79143	1.77558	2.69852	0.00696489	0.0607501	Rundc3a	RUN domain containing 3A [Source:MGI Symbol;Acc:MGI:1858752]
ENSMUSG00000006576	0.0950806	0.0799857	6.19762	0.0129059	0.989703	NA	Slc4a3	solute carrier family 4 (anion exchanger), member 3 [Source:MGI Symbol;Acc:MGI:109350]
ENSMUSG00000006585	3.17803	-2.94449	4.42501	-0.66542	0.505782	NA	Cdt1	chromatin licensing and DNA replication factor 1 [Source:MGI Symbol;Acc:MGI:1914427]
ENSMUSG00000006586	4.5651	3.03038	2.31179	1.31083	0.189914	NA	Runx1t1	RUNX1 translocation partner 1 [Source:MGI Symbol;Acc:MGI:104793]
ENSMUSG00000006587	2.72604	0.114661	3.51367	0.0326328	0.973967	NA	Snai3	snail family zinc finger 3 [Source:MGI Symbol;Acc:MGI:1353563]
ENSMUSG00000006589	55.2511	-0.897805	1.72857	-0.51939	0.603489	0.866512	Aprt	adenine phosphoribosyl transferase [Source:MGI Symbol;Acc:MGI:88061]
ENSMUSG00000006599	37.1344	-0.177608	0.821565	-0.216183	0.828845	0.948865	Gtf2h1	general transcription factor II H, polypeptide 1 [Source:MGI Symbol;Acc:MGI:1277216]
ENSMUSG00000006611	2.06271	2.17798	3.89561	0.559086	0.576103	NA	Hfe	homeostatic iron regulator [Source:MGI Symbol;Acc:MGI:109191]
ENSMUSG00000006638	0.116264	1.28586	6.22954	0.206413	0.836469	NA	Abhd1	abhydrolase domain containing 1 [Source:MGI Symbol;Acc:MGI:1931013]
ENSMUSG00000006641	6.26338	2.56092	2.14083	1.19623	0.231608	0.581789	Slc5a6	solute carrier family 5 (sodium-dependent vitamin transporter), member 6 [Source:MGI Symbol;Acc:MGI:2660847]
ENSMUSG00000006642	0.514806	-0.232256	6.17999	-0.0375819	0.970021	NA	Tcf23	transcription factor 23 [Source:MGI Symbol;Acc:MGI:1934960]
ENSMUSG00000006649	0.1765	3.17449	6.23278	0.509321	0.610527	NA	Nphs1	nephrosis 1, nephrin [Source:MGI Symbol;Acc:MGI:1859637]
ENSMUSG00000006651	5.29886	1.55553	2.19417	0.708938	0.478363	0.801323	Aplp1	amyloid beta precursor like protein 1 [Source:MGI Symbol;Acc:MGI:88046]
ENSMUSG00000006673	132.191	-0.931088	1.69079	-0.550683	0.581851	0.857842	Qrich1	glutamine-rich 1 [Source:MGI Symbol;Acc:MGI:1916482]
ENSMUSG00000006675	2.43748	-4.87417	2.75659	-1.76819	0.0770294	NA	P4htm	prolyl 4-hydroxylase, transmembrane (endoplasmic reticulum) [Source:MGI Symbol;Acc:MGI:1921693]
ENSMUSG00000006676	125.824	-0.265362	1.69131	-0.156897	0.875326	0.962229	Usp19	ubiquitin specific peptidase 19 [Source:MGI Symbol;Acc:MGI:1918722]
ENSMUSG00000006678	5.99091	1.39603	1.6489	0.84664	0.397196	0.743661	Pola1	polymerase (DNA directed), alpha 1 [Source:MGI Symbol;Acc:MGI:99660]
ENSMUSG00000006699	9.77161	-0.205421	2.09415	-0.098093	0.921858	0.97528	Cdc42	cell division cycle 42 [Source:MGI Symbol;Acc:MGI:106211]
ENSMUSG00000006705	40.2678	1.65652	0.524652	3.15737	0.00159201	0.0190056	Pknox1	Pbx/knotted 1 homeobox [Source:MGI Symbol;Acc:MGI:1201409]
ENSMUSG00000006711	0.778891	1.25843	6.08986	0.206644	0.836288	NA	D130043K22Rik	RIKEN cDNA D130043K22 gene [Source:MGI Symbol;Acc:MGI:3036268]
ENSMUSG00000006715	12.7597	0.934832	1.88365	0.496288	0.619691	0.873983	Gmnn	geminin [Source:MGI Symbol;Acc:MGI:1927344]
ENSMUSG00000006717	8.49345	4.44473	2.0635	2.15398	0.0312417	0.179794	Acot13	acyl-CoA thioesterase 13 [Source:MGI Symbol;Acc:MGI:1914084]
ENSMUSG00000006720	2.94215	0.150218	2.53112	0.0593483	0.952675	NA	Zfp184	zinc finger protein 184 (Kruppel-like) [Source:MGI Symbol;Acc:MGI:1922244]
ENSMUSG00000006724	0.0391084	0.523124	6.20785	0.0842681	0.932843	NA	Cyp27b1	cytochrome P450, family 27, subfamily b, polypeptide 1 [Source:MGI Symbol;Acc:MGI:1098274]
ENSMUSG00000006728	9.26998	3.98521	1.51149	2.63661	0.00837394	0.070129	Cdk4	cyclin dependent kinase 4 [Source:MGI Symbol;Acc:MGI:88357]
ENSMUSG00000006731	9.49534	1.56951	2.13337	0.735696	0.461916	0.790339	B4galnt1	beta-1,4-N-acetyl-galactosaminyl transferase 1 [Source:MGI Symbol;Acc:MGI:1342057]
ENSMUSG00000006732	1.17418	-2.22878	3.80963	-0.585039	0.558522	NA	Mettl1	methyltransferase 1, tRNA methylguanosine [Source:MGI Symbol;Acc:MGI:1339986]
ENSMUSG00000006736	2.79138	4.29955	3.16204	1.35974	0.173912	NA	Tspan31	tetraspanin 31 [Source:MGI Symbol;Acc:MGI:1914375]
ENSMUSG00000006740	12.5806	-0.0848271	1.24331	-0.0682269	0.945605	0.98247	Kif5b	kinesin family member 5B [Source:MGI Symbol;Acc:MGI:1098268]
ENSMUSG00000006763	14.9437	-1.77311	1.58463	-1.11895	0.263163	0.619111	Saal1	serum amyloid A-like 1 [Source:MGI Symbol;Acc:MGI:1926185]
ENSMUSG00000006764	5.21616	6.85443	1.96515	3.488	0.00048665	0.00701413	Tph2	tryptophan hydroxylase 2 [Source:MGI Symbol;Acc:MGI:2651811]
ENSMUSG00000006777	1.70336	-15.9925	5.94325	-2.69087	0.00712663	NA	Krt23	keratin 23 [Source:MGI Symbol;Acc:MGI:2148866]
ENSMUSG00000006782	0.57681	0.271671	6.08149	0.0446717	0.964369	NA	Cnp	2',3'-cyclic nucleotide 3' phosphodiesterase [Source:MGI Symbol;Acc:MGI:88437]
ENSMUSG00000006784	172.559	1.91986	1.44117	1.33215	0.18281	0.522843	Odad4	outer dynein arm complex subunit 4 [Source:MGI Symbol;Acc:MGI:1921657]
ENSMUSG00000006800	4.23593	0.47571	2.37944	0.199926	0.841539	NA	Sulf2	sulfatase 2 [Source:MGI Symbol;Acc:MGI:1919293]
ENSMUSG00000006818	60.32	0.607663	0.962671	0.631226	0.527893	0.831978	Sod2	superoxide dismutase 2, mitochondrial [Source:MGI Symbol;Acc:MGI:98352]
ENSMUSG00000006850	5.4853	-0.536677	1.88846	-0.284187	0.776267	0.93147	Tmco6	transmembrane and coiled-coil domains 6 [Source:MGI Symbol;Acc:MGI:1919233]
ENSMUSG00000006906	7.5868	2.02354	1.94634	1.03966	0.298497	0.656653	Stambp	STAM binding protein [Source:MGI Symbol;Acc:MGI:1917777]
ENSMUSG00000006920	9.04678	-0.538802	1.88917	-0.285205	0.775487	0.93147	Ezh1	enhancer of zeste 1 polycomb repressive complex 2 subunit [Source:MGI Symbol;Acc:MGI:1097695]
ENSMUSG00000006930	32.9862	0.567177	0.987122	0.574576	0.565578	0.851248	Hap1	huntingtin-associated protein 1 [Source:MGI Symbol;Acc:MGI:1261831]
ENSMUSG00000006931	6.32638	-1.84385	1.42446	-1.29442	0.195519	0.537236	P3h4	prolyl 3-hydroxylase family member 4 (non-enzymatic) [Source:MGI Symbol;Acc:MGI:1913430]
ENSMUSG00000006932	37.4446	-1.21909	1.73894	-0.701056	0.483268	0.806005	Ctnnb1	catenin beta 1 [Source:MGI Symbol;Acc:MGI:88276]
ENSMUSG00000006941	95.9811	-0.183506	0.486847	-0.376927	0.706228	0.907795	Eif1b	eukaryotic translation initiation factor 1B [Source:MGI Symbol;Acc:MGI:1916219]
ENSMUSG00000006948	0	NA	NA	NA	NA	NA	Klk4	kallikrein related-peptidase 4 (prostase, enamel matrix, prostate) [Source:MGI Symbol;Acc:MGI:1861379]
ENSMUSG00000006958	0	NA	NA	NA	NA	NA	Chrd	chordin [Source:MGI Symbol;Acc:MGI:1313268]
ENSMUSG00000006998	176.414	-1.15562	1.69578	-0.681467	0.495576	0.812638	Psmd2	proteasome (prosome, macropain) 26S subunit, non-ATPase, 2 [Source:MGI Symbol;Acc:MGI:1096584]
ENSMUSG00000007021	0	NA	NA	NA	NA	NA	Syngr3	synaptogyrin 3 [Source:MGI Symbol;Acc:MGI:1341881]
ENSMUSG00000007029	895.499	3.95287	1.67588	2.35869	0.0183396	0.123997	Vars1	valyl-tRNA synthetase 1 [Source:MGI Symbol;Acc:MGI:90675]
ENSMUSG00000007030	3.17982	3.71697	2.71487	1.36911	0.170964	NA	Vwa7	von Willebrand factor A domain containing 7 [Source:MGI Symbol;Acc:MGI:1306798]
ENSMUSG00000007033	2232.87	1.53028	0.186956	8.18524	2.72e-16	2.47e-14	Hspa1l	heat shock protein 1-like [Source:MGI Symbol;Acc:MGI:96231]
ENSMUSG00000007034	0	NA	NA	NA	NA	NA	Slc44a4	solute carrier family 44, member 4 [Source:MGI Symbol;Acc:MGI:1917379]
ENSMUSG00000007035	9.39862	-1.53905	2.07092	-0.743172	0.457378	0.787707	Msh5	mutS homolog 5 [Source:MGI Symbol;Acc:MGI:1329021]
ENSMUSG00000007036	14.1008	1.40462	1.90011	0.739232	0.459766	0.789375	Abhd16a	abhydrolase domain containing 16A [Source:MGI Symbol;Acc:MGI:99476]
ENSMUSG00000007038	0.588693	7.40732	6.10232	1.21385	0.224803	NA	Neu1	neuraminidase 1 [Source:MGI Symbol;Acc:MGI:97305]
ENSMUSG00000007039	2.02819	5.7223	4.68772	1.2207	0.222199	NA	Ddah2	DDAH family member 2, ADMA independent [Source:MGI Symbol;Acc:MGI:1859016]
ENSMUSG00000007041	11.6298	2.58363	1.2432	2.0782	0.0376909	0.205668	Clic1	chloride intracellular channel 1 [Source:MGI Symbol;Acc:MGI:2148924]
ENSMUSG00000007050	27.8663	-0.879209	1.81731	-0.483798	0.628529	0.877054	Lsm2	LSM2 homolog, U6 small nuclear RNA and mRNA degradation associated [Source:MGI Symbol;Acc:MGI:90676]
ENSMUSG00000007080	59.3214	-0.996059	0.493992	-2.01635	0.0437639	0.227481	Pole	polymerase (DNA directed), epsilon [Source:MGI Symbol;Acc:MGI:1196391]
ENSMUSG00000007097	14.8321	4.72162	1.37076	3.44453	0.000572056	0.0080727	Atp1a2	ATPase, Na+/K+ transporting, alpha 2 polypeptide [Source:MGI Symbol;Acc:MGI:88106]
ENSMUSG00000007107	2375.66	0.654884	0.107418	6.09657	1.08e-09	4.74e-08	Atp1a4	ATPase, Na+/K+ transporting, alpha 4 polypeptide [Source:MGI Symbol;Acc:MGI:1351335]
ENSMUSG00000007122	4.11771	0.838246	1.40471	0.596739	0.550681	NA	Casq1	calsequestrin 1 [Source:MGI Symbol;Acc:MGI:1309468]
ENSMUSG00000007207	1.23644	8.31118	6.09482	1.36365	0.172679	NA	Stx1a	syntaxin 1A (brain) [Source:MGI Symbol;Acc:MGI:109355]
ENSMUSG00000007209	0.232528	0.81631	6.21592	0.131326	0.895518	NA	Ceacam9	CEA cell adhesion molecule 9 [Source:MGI Symbol;Acc:MGI:1347247]
ENSMUSG00000007216	0.240453	10.4156	6.14288	1.69555	0.0899712	NA	Zfp775	zinc finger protein 775 [Source:MGI Symbol;Acc:MGI:2683557]
ENSMUSG00000007279	8.05554	1.80437	2.14043	0.842992	0.399233	0.745408	Scube2	signal peptide, CUB domain, EGF-like 2 [Source:MGI Symbol;Acc:MGI:1928765]
ENSMUSG00000007338	18.5065	3.13002	0.969368	3.22893	0.00124253	0.015494	Mrpl49	mitochondrial ribosomal protein L49 [Source:MGI Symbol;Acc:MGI:108180]
ENSMUSG00000007379	3.50897	-0.925644	3.0812	-0.300417	0.763859	NA	Dennd2c	DENN domain containing 2C [Source:MGI Symbol;Acc:MGI:3036254]
ENSMUSG00000007411	28.6865	-1.50899	1.77753	-0.848923	0.395924	0.742309	Mark3	MAP/microtubule affinity regulating kinase 3 [Source:MGI Symbol;Acc:MGI:1341865]
ENSMUSG00000007415	36.6044	1.13455	0.598094	1.89694	0.0578363	0.273801	Gatad1	GATA zinc finger domain containing 1 [Source:MGI Symbol;Acc:MGI:1914460]
ENSMUSG00000007440	10.2436	2.77817	2.06084	1.34807	0.177634	0.515274	Pcdha10	protocadherin alpha 10 [Source:MGI Symbol;Acc:MGI:1298408]
ENSMUSG00000007457	13.7406	2.621	1.92351	1.36261	0.173005	0.508714	2310003L06Rik	RIKEN cDNA 2310003L06 gene [Source:MGI Symbol;Acc:MGI:1921498]
ENSMUSG00000007458	3.57799	-0.547639	2.45183	-0.223359	0.823256	NA	M6pr	mannose-6-phosphate receptor, cation dependent [Source:MGI Symbol;Acc:MGI:96904]
ENSMUSG00000007476	0	NA	NA	NA	NA	NA	Lrrc8a	leucine rich repeat containing 8A VRAC subunit A [Source:MGI Symbol;Acc:MGI:2652847]
ENSMUSG00000007480	1.09307	2.76569	6.13369	0.450902	0.65206	NA	Mc5r	melanocortin 5 receptor [Source:MGI Symbol;Acc:MGI:99420]
ENSMUSG00000007564	11.4217	-3.19401	1.72817	-1.8482	0.0645737	0.293672	Ppp2r1a	protein phosphatase 2, regulatory subunit A, alpha [Source:MGI Symbol;Acc:MGI:1926334]
ENSMUSG00000007570	1.56612	-0.659415	3.96274	-0.166404	0.867839	NA	Fance	Fanconi anemia, complementation group E [Source:MGI Symbol;Acc:MGI:1920025]
ENSMUSG00000007589	19.5045	0.617416	1.96524	0.314168	0.753393	0.924468	Tinf2	Terf1 (TRF1)-interacting nuclear factor 2 [Source:MGI Symbol;Acc:MGI:107246]
ENSMUSG00000007591	45.547	-1.63276	1.73458	-0.9413	0.346551	0.699956	Tssk4	testis-specific serine kinase 4 [Source:MGI Symbol;Acc:MGI:1918349]
ENSMUSG00000007594	13.7586	2.38266	1.93111	1.23383	0.217268	0.564359	Hapln4	hyaluronan and proteoglycan link protein 4 [Source:MGI Symbol;Acc:MGI:2679531]
ENSMUSG00000007603	4.77584	-0.635869	2.48105	-0.25629	0.797727	0.938067	Dus3l	dihydrouridine synthase 3 like [Source:MGI Symbol;Acc:MGI:2147092]
ENSMUSG00000007610	0.228194	-1.0172	6.15883	-0.165161	0.868818	NA	Gtpbp3	GTP binding protein 3 [Source:MGI Symbol;Acc:MGI:1917609]
ENSMUSG00000007613	21.3789	-1.17509	0.907544	-1.2948	0.195388	0.537236	Tgfbr1	transforming growth factor, beta receptor I [Source:MGI Symbol;Acc:MGI:98728]
ENSMUSG00000007617	4.8107	1.82504	2.1865	0.834684	0.403895	0.749525	Homer1	homer scaffolding protein 1 [Source:MGI Symbol;Acc:MGI:1347345]
ENSMUSG00000007646	18.09	-2.44751	1.148	-2.13198	0.0330088	0.186997	Rad51c	RAD51 paralog C [Source:MGI Symbol;Acc:MGI:2150020]
ENSMUSG00000007653	0.209177	-0.901321	6.16194	-0.146272	0.883706	NA	Gabrb2	gamma-aminobutyric acid type A receptor subunit beta 2 [Source:MGI Symbol;Acc:MGI:95620]
ENSMUSG00000007655	0	NA	NA	NA	NA	NA	Cav1	caveolin 1, caveolae protein [Source:MGI Symbol;Acc:MGI:102709]
ENSMUSG00000007656	21.6861	0.42105	1.77982	0.236569	0.812991	0.942472	Arpp19	cAMP-regulated phosphoprotein 19 [Source:MGI Symbol;Acc:MGI:1891691]
ENSMUSG00000007659	9.54596	0.852151	1.87988	0.453299	0.650333	0.884158	Bcl2l1	BCL2-like 1 [Source:MGI Symbol;Acc:MGI:88139]
ENSMUSG00000007670	41.4357	0.13081	0.454131	0.288044	0.773313	0.931449	Khsrp	KH-type splicing regulatory protein [Source:MGI Symbol;Acc:MGI:1336214]
ENSMUSG00000007682	36.882	4.93993	1.32077	3.74019	0.000183881	0.00298728	Dio2	deiodinase, iodothyronine, type II [Source:MGI Symbol;Acc:MGI:1338833]
ENSMUSG00000007721	102.332	0.780204	0.418811	1.8629	0.0624761	0.287591	Ccdc124	coiled-coil domain containing 124 [Source:MGI Symbol;Acc:MGI:1916403]
ENSMUSG00000007739	465.5	-1.66716	1.68492	-0.989459	0.322438	0.679442	Cct4	chaperonin containing TCP1 subunit 4 [Source:MGI Symbol;Acc:MGI:104689]
ENSMUSG00000007777	9.47918	-0.943623	1.9644	-0.480361	0.630971	0.878103	Trappc2b	trafficking protein particle complex 2B [Source:MGI Symbol;Acc:MGI:1913300]
ENSMUSG00000007783	16.5074	-0.00621608	1.81778	-0.00341961	0.997272	0.99916	Cpt1c	carnitine palmitoyltransferase 1c [Source:MGI Symbol;Acc:MGI:2446526]
ENSMUSG00000007805	0	NA	NA	NA	NA	NA	Twist2	twist basic helix-loop-helix transcription factor 2 [Source:MGI Symbol;Acc:MGI:104685]
ENSMUSG00000007812	4.77216	-1.5043	2.50119	-0.601433	0.547551	0.842192	Zfp655	zinc finger protein 655 [Source:MGI Symbol;Acc:MGI:1919861]
ENSMUSG00000007815	19.0532	-1.11826	0.712841	-1.56874	0.116708	0.413596	Rhoa	ras homolog family member A [Source:MGI Symbol;Acc:MGI:1096342]
ENSMUSG00000007817	4.67975	1.57663	2.26875	0.694934	0.487097	NA	Zmiz1	zinc finger, MIZ-type containing 1 [Source:MGI Symbol;Acc:MGI:3040693]
ENSMUSG00000007827	4.1526	2.94172	2.78025	1.05808	0.29002	NA	Ankrd26	ankyrin repeat domain 26 [Source:MGI Symbol;Acc:MGI:1917887]
ENSMUSG00000007833	4.62917	0.0498642	2.58953	0.0192561	0.984637	NA	Aldh16a1	aldehyde dehydrogenase 16 family, member A1 [Source:MGI Symbol;Acc:MGI:1916998]
ENSMUSG00000007836	64.6088	2.21458	0.358584	6.17591	6.58e-10	3e-08	Hnrnpa0	heterogeneous nuclear ribonucleoprotein A0 [Source:MGI Symbol;Acc:MGI:1924384]
ENSMUSG00000007837	1.82395	1.24057	5.32097	0.233147	0.815648	NA	Prrg2	proline-rich Gla (G-carboxyglutamic acid) polypeptide 2 [Source:MGI Symbol;Acc:MGI:1929596]
ENSMUSG00000007850	78.4809	-0.351695	1.74084	-0.202026	0.839897	0.951579	Hnrnph1	heterogeneous nuclear ribonucleoprotein H1 [Source:MGI Symbol;Acc:MGI:1891925]
ENSMUSG00000007867	336.508	-2.20513	1.68055	-1.31215	0.18947	0.530106	Ift43	intraflagellar transport 43 [Source:MGI Symbol;Acc:MGI:1923661]
ENSMUSG00000007872	1.94511	-1.40871	4.6139	-0.305319	0.760123	NA	Id3	inhibitor of DNA binding 3 [Source:MGI Symbol;Acc:MGI:96398]
ENSMUSG00000007877	0.341491	4.01812	6.20813	0.647235	0.51748	NA	Tcap	titin-cap [Source:MGI Symbol;Acc:MGI:1330233]
ENSMUSG00000007880	50.5317	0.740495	0.649565	1.13999	0.254292	0.6078	Arid1a	AT-rich interaction domain 1A [Source:MGI Symbol;Acc:MGI:1935147]
ENSMUSG00000007888	12.6075	0.665752	1.98243	0.335826	0.737002	0.92061	Crlf1	cytokine receptor-like factor 1 [Source:MGI Symbol;Acc:MGI:1340030]
ENSMUSG00000007891	2.95686	-1.94022	3.44283	-0.563554	0.573058	NA	Ctsd	cathepsin D [Source:MGI Symbol;Acc:MGI:88562]
ENSMUSG00000007892	192.041	2.46816	0.550722	4.48168	7.41e-06	0.000170788	Rplp1	ribosomal protein lateral stalk subunit P1 [Source:MGI Symbol;Acc:MGI:1927099]
ENSMUSG00000007907	2142.63	0.00160117	0.15639	0.0102383	0.991831	0.997772	Cabs1	calcium binding protein, spermatid specific 1 [Source:MGI Symbol;Acc:MGI:1918227]
ENSMUSG00000007908	0.563765	5.42539	6.15446	0.881538	0.378026	NA	Hmgcll1	3-hydroxymethyl-3-methylglutaryl-Coenzyme A lyase-like 1 [Source:MGI Symbol;Acc:MGI:2446108]
ENSMUSG00000007944	38.6893	1.55967	1.7553	0.888549	0.374245	0.724611	Ttc9b	tetratricopeptide repeat domain 9B [Source:MGI Symbol;Acc:MGI:1920282]
ENSMUSG00000007946	1.71153	4.45543	5.10586	0.87261	0.382876	NA	Phox2a	paired-like homeobox 2a [Source:MGI Symbol;Acc:MGI:106633]
ENSMUSG00000007950	118.834	2.20086	0.317017	6.94242	3.85e-12	2.48e-10	Abhd8	abhydrolase domain containing 8 [Source:MGI Symbol;Acc:MGI:1918946]
ENSMUSG00000007987	32.5348	0.161151	1.76526	0.0912902	0.927262	0.976854	Ift22	intraflagellar transport 22 [Source:MGI Symbol;Acc:MGI:1914536]
ENSMUSG00000007989	2.22818	-1.12661	3.88559	-0.289945	0.771859	NA	Fzd3	frizzled class receptor 3 [Source:MGI Symbol;Acc:MGI:108476]
ENSMUSG00000008028	9.8051	-0.823865	1.72224	-0.478369	0.632388	0.878577	1700008O03Rik	RIKEN cDNA 1700008O03 gene [Source:MGI Symbol;Acc:MGI:1916599]
ENSMUSG00000008035	0	NA	NA	NA	NA	NA	Mid1ip1	Mid1 interacting protein 1 (gastrulation specific G12-like (zebrafish)) [Source:MGI Symbol;Acc:MGI:1915291]
ENSMUSG00000008036	13.2109	-1.04669	1.88089	-0.556486	0.577879	0.856395	Ap2s1	adaptor-related protein complex 2, sigma 1 subunit [Source:MGI Symbol;Acc:MGI:2141861]
ENSMUSG00000008090	5.74889	0.927014	2.13627	0.433941	0.664331	0.891337	Fgfrl1	fibroblast growth factor receptor-like 1 [Source:MGI Symbol;Acc:MGI:2150920]
ENSMUSG00000008129	47.707	-0.652248	1.73801	-0.375284	0.707449	0.908698	Brme1	break repair meiotic recombinase recruitment factor 1 [Source:MGI Symbol;Acc:MGI:1921916]
ENSMUSG00000008136	1.49718	-4.32982	4.36512	-0.991915	0.321239	NA	Fhl2	four and a half LIM domains 2 [Source:MGI Symbol;Acc:MGI:1338762]
ENSMUSG00000008140	29.6979	0.379448	1.75822	0.215813	0.829133	0.948865	Emc10	ER membrane protein complex subunit 10 [Source:MGI Symbol;Acc:MGI:1916933]
ENSMUSG00000008153	2.23418	1.61296	5.23678	0.308006	0.758078	NA	Clstn3	calsyntenin 3 [Source:MGI Symbol;Acc:MGI:2178323]
ENSMUSG00000008167	16.2729	-0.376246	1.94356	-0.193586	0.8465	0.954408	Fbxw9	F-box and WD-40 domain protein 9 [Source:MGI Symbol;Acc:MGI:1915878]
ENSMUSG00000008193	0.232528	0.81631	6.21592	0.131326	0.895518	NA	Spib	Spi-B transcription factor (Spi-1/PU.1 related) [Source:MGI Symbol;Acc:MGI:892986]
ENSMUSG00000008200	30.5349	0.53516	1.75096	0.305637	0.759881	0.927679	Fnbp4	formin binding protein 4 [Source:MGI Symbol;Acc:MGI:1860513]
ENSMUSG00000008206	1.19678	7.47969	6.13615	1.21895	0.222861	NA	Cers4	ceramide synthase 4 [Source:MGI Symbol;Acc:MGI:1914510]
ENSMUSG00000008226	5.59402	-0.959587	1.46007	-0.657218	0.511041	0.820076	Scrn3	secernin 3 [Source:MGI Symbol;Acc:MGI:1921866]
ENSMUSG00000008301	16.5638	0.923557	0.966724	0.955347	0.339402	0.694977	Phax	phosphorylated adaptor for RNA export [Source:MGI Symbol;Acc:MGI:1891839]
ENSMUSG00000008305	1.90516	2.32133	3.99716	0.580746	0.561412	NA	Tle1	transducin-like enhancer of split 1 [Source:MGI Symbol;Acc:MGI:104636]
ENSMUSG00000008307	146.974	-1.591	1.68744	-0.942849	0.345758	0.699657	1700109H08Rik	RIKEN cDNA 1700109H08 gene [Source:MGI Symbol;Acc:MGI:1924286]
ENSMUSG00000008318	0.697001	-3.5656	6.11649	-0.582948	0.559928	NA	Relt	RELT tumor necrosis factor receptor [Source:MGI Symbol;Acc:MGI:2443373]
ENSMUSG00000008333	13.4123	-2.16794	1.99097	-1.08889	0.276204	0.63295	Snrpb2	U2 small nuclear ribonucleoprotein B [Source:MGI Symbol;Acc:MGI:104805]
ENSMUSG00000008348	71.6473	0.44213	0.652984	0.677091	0.498348	0.81481	Ubc	ubiquitin C [Source:MGI Symbol;Acc:MGI:98889]
ENSMUSG00000008373	18.7667	-1.54573	1.93287	-0.799708	0.42388	0.764553	Prpf31	pre-mRNA processing factor 31 [Source:MGI Symbol;Acc:MGI:1916238]
ENSMUSG00000008384	9.33207	0.665711	1.04054	0.639773	0.52232	0.827939	Sertad1	SERTA domain containing 1 [Source:MGI Symbol;Acc:MGI:1913438]
ENSMUSG00000008393	194.447	2.44272	0.248715	9.82137	9.11e-23	1.25e-20	Carhsp1	calcium regulated heat stable protein 1 [Source:MGI Symbol;Acc:MGI:1196368]
ENSMUSG00000008398	34.6126	4.79808	0.830593	5.77669	7.62e-09	3.01e-07	Elk3	ELK3, member of ETS oncogene family [Source:MGI Symbol;Acc:MGI:101762]
ENSMUSG00000008429	300.867	2.37651	0.509309	4.66613	3.07e-06	7.72e-05	Herpud2	HERPUD family member 2 [Source:MGI Symbol;Acc:MGI:1915393]
ENSMUSG00000008435	0.906334	-0.850517	3.80438	-0.223563	0.823098	NA	Rdh13	retinol dehydrogenase 13 (all-trans and 9-cis) [Source:MGI Symbol;Acc:MGI:1918732]
ENSMUSG00000008438	100.088	0.0182338	0.370816	0.0491722	0.960782	0.986008	Adam21	a disintegrin and metallopeptidase domain 21 [Source:MGI Symbol;Acc:MGI:1861229]
ENSMUSG00000008450	0.111	3.12292	6.22788	0.501441	0.616061	NA	Nutf2	nuclear transport factor 2 [Source:MGI Symbol;Acc:MGI:1915301]
ENSMUSG00000008461	22.4563	3.60074	1.84175	1.95506	0.0505755	0.249969	Fut1	fucosyltransferase 1 [Source:MGI Symbol;Acc:MGI:109375]
ENSMUSG00000008475	4.09478	2.63978	2.73753	0.964293	0.334899	NA	Arpc5	actin related protein 2/3 complex, subunit 5 [Source:MGI Symbol;Acc:MGI:1915021]
ENSMUSG00000008482	209.234	0.306712	0.847528	0.36189	0.717434	0.911739	Rnf151	ring finger protein 151 [Source:MGI Symbol;Acc:MGI:1914754]
ENSMUSG00000008489	2.20717	0.840095	6.02687	0.139392	0.889141	NA	Elavl2	ELAV like RNA binding protein 1 [Source:MGI Symbol;Acc:MGI:1100887]
ENSMUSG00000008496	1.4364	0.887732	6.03877	0.147005	0.883128	NA	Pou2f2	POU domain, class 2, transcription factor 2 [Source:MGI Symbol;Acc:MGI:101897]
ENSMUSG00000008540	4.43539	3.26232	3.10192	1.05171	0.292933	NA	Mgst1	microsomal glutathione S-transferase 1 [Source:MGI Symbol;Acc:MGI:1913850]
ENSMUSG00000008575	0	NA	NA	NA	NA	NA	Nfib	nuclear factor I/B [Source:MGI Symbol;Acc:MGI:103188]
ENSMUSG00000008590	0.222	3.58466	6.21502	0.576774	0.564092	NA	Htr3b	5-hydroxytryptamine (serotonin) receptor 3B [Source:MGI Symbol;Acc:MGI:1861899]
ENSMUSG00000008601	0	NA	NA	NA	NA	NA	Rab25	RAB25, member RAS oncogene family [Source:MGI Symbol;Acc:MGI:1858203]
ENSMUSG00000008604	30.3609	0.715931	0.94912	0.75431	0.450663	0.784136	Ubqln4	ubiquilin 4 [Source:MGI Symbol;Acc:MGI:2150152]
ENSMUSG00000008658	0	NA	NA	NA	NA	NA	Rbfox1	RNA binding protein, fox-1 homolog (C. elegans) 1 [Source:MGI Symbol;Acc:MGI:1926224]
ENSMUSG00000008668	0.293253	4.0473	6.21	0.651738	0.51457	NA	Rps18	ribosomal protein S18 [Source:MGI Symbol;Acc:MGI:98146]
ENSMUSG00000008682	0	NA	NA	NA	NA	NA	Rpl10	ribosomal protein L10 [Source:MGI Symbol;Acc:MGI:105943]
ENSMUSG00000008683	2.87241	-1.99836	4.49675	-0.4444	0.656753	NA	Rps15a	ribosomal protein S15A [Source:MGI Symbol;Acc:MGI:2389091]
ENSMUSG00000008690	8.80219	0.0643399	1.94324	0.0331097	0.973587	0.991207	Ncaph2	non-SMC condensin II complex, subunit H2 [Source:MGI Symbol;Acc:MGI:1289164]
ENSMUSG00000008730	146.538	4.38582	1.69519	2.58721	0.00967574	0.0783255	Hipk1	homeodomain interacting protein kinase 1 [Source:MGI Symbol;Acc:MGI:1314873]
ENSMUSG00000008734	31.6722	1.39542	0.602893	2.31453	0.0206385	0.136204	Gprc5b	G protein-coupled receptor, family C, group 5, member B [Source:MGI Symbol;Acc:MGI:1927596]
ENSMUSG00000008763	77.9717	1.796	0.500301	3.58985	0.000330874	0.00502961	Man1a2	mannosidase, alpha, class 1A, member 2 [Source:MGI Symbol;Acc:MGI:104676]
ENSMUSG00000008789	0	NA	NA	NA	NA	NA	Ceacam5	CEA cell adhesion molecule 5 [Source:MGI Symbol;Acc:MGI:1920500]
ENSMUSG00000008813	668.522	4.21955	1.67794	2.51471	0.0119129	0.0915001	Tppp2	tubulin polymerization-promoting protein family member 2 [Source:MGI Symbol;Acc:MGI:2684923]
ENSMUSG00000008822	154.834	-2.14851	1.654	-1.29898	0.193951	0.53663	Acyp1	acylphosphatase 1 [Source:MGI Symbol;Acc:MGI:1913454]
ENSMUSG00000008843	11.0116	4.97839	1.58875	3.13353	0.00172719	0.0204132	Cldn13	claudin 13 [Source:MGI Symbol;Acc:MGI:1913102]
ENSMUSG00000008845	1.12218	-0.243056	6.04702	-0.0401943	0.967938	NA	Cd163	CD163 antigen [Source:MGI Symbol;Acc:MGI:2135946]
ENSMUSG00000008855	22.6542	-0.688509	0.90947	-0.757044	0.449023	0.782889	Hdac5	histone deacetylase 5 [Source:MGI Symbol;Acc:MGI:1333784]
ENSMUSG00000008859	9.49518	-0.226548	1.61081	-0.140642	0.888153	0.965894	Rala	v-ral simian leukemia viral oncogene A (ras related) [Source:MGI Symbol;Acc:MGI:1927243]
ENSMUSG00000008874	14.5772	2.81696	1.90598	1.47796	0.139419	0.450979	Clec3a	C-type lectin domain family 3, member a [Source:MGI Symbol;Acc:MGI:2685642]
ENSMUSG00000008892	12.6823	-2.14292	1.90243	-1.12641	0.259991	0.615105	Vdac3	voltage-dependent anion channel 3 [Source:MGI Symbol;Acc:MGI:106922]
ENSMUSG00000008932	2.04429	-2.83349	4.76907	-0.594139	0.552419	NA	Slc1a7	solute carrier family 1 (glutamate transporter), member 7 [Source:MGI Symbol;Acc:MGI:2444087]
ENSMUSG00000008958	5.72832	-1.43089	2.18421	-0.655104	0.512401	0.821086	Vps72	vacuolar protein sorting 72 [Source:MGI Symbol;Acc:MGI:1202305]
ENSMUSG00000008976	31.5076	-1.94139	0.821249	-2.36395	0.0180811	0.122838	Gabpa	GA repeat binding protein, alpha [Source:MGI Symbol;Acc:MGI:95610]
ENSMUSG00000008999	7.69885	-0.235608	2.2924	-0.102778	0.91814	0.975092	Bmp7	bone morphogenetic protein 7 [Source:MGI Symbol;Acc:MGI:103302]
ENSMUSG00000009013	257.481	1.20849	0.612604	1.97272	0.0485277	0.242254	Dynll1	dynein light chain LC8-type 1 [Source:MGI Symbol;Acc:MGI:1861457]
ENSMUSG00000009030	3.13963	0.592525	2.1874	0.270881	0.786483	NA	Pdcl	phosducin-like [Source:MGI Symbol;Acc:MGI:1914716]
ENSMUSG00000009035	0.45683	-2.88949	6.12966	-0.471394	0.637359	NA	Tmem184b	transmembrane protein 184b [Source:MGI Symbol;Acc:MGI:2445179]
ENSMUSG00000009047	0	NA	NA	NA	NA	NA	Gm5965	predicted gene 5965 [Source:MGI Symbol;Acc:MGI:3645197]
ENSMUSG00000009070	13.3794	-1.39905	1.92954	-0.725069	0.46841	0.793535	Rsph14	radial spoke head homolog 14 (Chlamydomonas) [Source:MGI Symbol;Acc:MGI:1918486]
ENSMUSG00000009073	41.8771	2.9399	1.55205	1.8942	0.0581982	0.274995	Nf2	neurofibromin 2 [Source:MGI Symbol;Acc:MGI:97307]
ENSMUSG00000009075	18.6621	1.69364	1.83818	0.92137	0.356857	0.710035	Cabp7	calcium binding protein 7 [Source:MGI Symbol;Acc:MGI:2183437]
ENSMUSG00000009076	7.60549	0.345704	2.25644	0.153208	0.878234	0.963085	Zmat5	zinc finger, matrin type 5 [Source:MGI Symbol;Acc:MGI:1914428]
ENSMUSG00000009079	91.5205	0.571257	1.3489	0.423499	0.671931	0.894838	Ewsr1	Ewing sarcoma breakpoint region 1 [Source:MGI Symbol;Acc:MGI:99960]
ENSMUSG00000009090	45.5801	-0.418462	1.73324	-0.241433	0.80922	0.941798	Ap1b1	adaptor protein complex AP-1, beta 1 subunit [Source:MGI Symbol;Acc:MGI:1096368]
ENSMUSG00000009092	7.473	2.0333	1.98983	1.02185	0.306854	0.665657	Derl3	Der1-like domain family, member 3 [Source:MGI Symbol;Acc:MGI:1917627]
ENSMUSG00000009093	196.085	2.40441	1.68855	1.42395	0.154462	0.47946	Gstt4	glutathione S-transferase, theta 4 [Source:MGI Symbol;Acc:MGI:1923136]
ENSMUSG00000009097	7.43899	2.12015	2.35057	0.901971	0.367072	0.717797	Tbx1	T-box 1 [Source:MGI Symbol;Acc:MGI:98493]
ENSMUSG00000009108	0.111	3.12292	6.22788	0.501441	0.616061	NA	Gnat2	G protein subunit alpha transducin 2 [Source:MGI Symbol;Acc:MGI:95779]
ENSMUSG00000009112	60.5568	2.8359	0.552742	5.13061	2.89e-07	8.7e-06	Bcl2l13	BCL2 like 13 [Source:MGI Symbol;Acc:MGI:2136959]
ENSMUSG00000009114	0	NA	NA	NA	NA	NA	2610028H24Rik	RIKEN cDNA 2610028H24 gene [Source:MGI Symbol;Acc:MGI:1924214]
ENSMUSG00000009115	60.8471	3.51151	1.54393	2.2744	0.0229419	0.14617	Spatc1l	spermatogenesis and centriole associated 1 like [Source:MGI Symbol;Acc:MGI:1923823]
ENSMUSG00000009145	1.02125	4.80875	5.66296	0.849158	0.395794	NA	Dqx1	DEAQ RNA-dependent ATPase [Source:MGI Symbol;Acc:MGI:2136388]
ENSMUSG00000009185	0.785816	5.08428	6.16893	0.824176	0.40984	NA	Ccl8	C-C motif chemokine ligand 8 [Source:MGI Symbol;Acc:MGI:101878]
ENSMUSG00000009207	46.1232	1.30934	1.74126	0.751951	0.452081	0.784254	Lnpk	lunapark, ER junction formation factor [Source:MGI Symbol;Acc:MGI:1918115]
ENSMUSG00000009210	0.564558	-0.385569	6.17314	-0.062459	0.950197	NA	Prr29	proline rich 29 [Source:MGI Symbol;Acc:MGI:1922823]
ENSMUSG00000009214	0	NA	NA	NA	NA	NA	Mymk	myomaker, myoblast fusion factor [Source:MGI Symbol;Acc:MGI:1913389]
ENSMUSG00000009216	1.26357	4.13274	4.39364	0.94062	0.3469	NA	Fam163b	family with sequence similarity 163, member B [Source:MGI Symbol;Acc:MGI:1926106]
ENSMUSG00000009246	1.84325	2.14396	5.48245	0.391058	0.695754	NA	Trpm5	transient receptor potential cation channel, subfamily M, member 5 [Source:MGI Symbol;Acc:MGI:1861718]
ENSMUSG00000009248	1.11316	1.5632	6.05419	0.258202	0.796251	NA	Ascl2	achaete-scute family bHLH transcription factor 2 [Source:MGI Symbol;Acc:MGI:96920]
ENSMUSG00000009281	0.114097	-0.11098	6.19077	-0.0179267	0.985697	NA	Rarres2	retinoic acid receptor responder (tazarotene induced) 2 [Source:MGI Symbol;Acc:MGI:1918910]
ENSMUSG00000009291	243.571	0.939504	0.464729	2.02162	0.043216	0.225128	Pttg1ip	pituitary tumor-transforming 1 interacting protein [Source:MGI Symbol;Acc:MGI:2652132]
ENSMUSG00000009292	0	NA	NA	NA	NA	NA	Trpm2	transient receptor potential cation channel, subfamily M, member 2 [Source:MGI Symbol;Acc:MGI:1351901]
ENSMUSG00000009293	48.2601	0.627993	1.75531	0.357767	0.720518	0.913199	Ube2g2	ubiquitin-conjugating enzyme E2G 2 [Source:MGI Symbol;Acc:MGI:1343188]
ENSMUSG00000009350	5.55836	0.866139	2.25196	0.384616	0.700522	0.905308	Mpo	myeloperoxidase [Source:MGI Symbol;Acc:MGI:97137]
ENSMUSG00000009356	0.396242	-0.521268	6.13926	-0.0849073	0.932335	NA	Lpo	lactoperoxidase [Source:MGI Symbol;Acc:MGI:1923363]
ENSMUSG00000009376	0.955566	9.41105	6.1151	1.53898	0.123808	NA	Met	met proto-oncogene [Source:MGI Symbol;Acc:MGI:96969]
ENSMUSG00000009378	0.624914	3.07178	6.17814	0.497201	0.619047	NA	Slc16a12	solute carrier family 16 (monocarboxylic acid transporters), member 12 [Source:MGI Symbol;Acc:MGI:2147716]
ENSMUSG00000009394	3.96504	-2.35806	2.96521	-0.795243	0.426472	NA	Syn2	synapsin II [Source:MGI Symbol;Acc:MGI:103020]
ENSMUSG00000009406	0.807528	3.37809	6.16446	0.547995	0.583696	NA	Elk1	ELK1, member of ETS oncogene family [Source:MGI Symbol;Acc:MGI:101833]
ENSMUSG00000009418	1.43062	3.92063	5.27807	0.742816	0.457593	NA	Nav1	neuron navigator 1 [Source:MGI Symbol;Acc:MGI:2183683]
ENSMUSG00000009470	71.2016	-0.802229	1.70516	-0.470472	0.638018	0.879588	Tnpo1	transportin 1 [Source:MGI Symbol;Acc:MGI:2681523]
ENSMUSG00000009471	3.30239	5.66242	4.16659	1.359	0.174145	NA	Myod1	myogenic differentiation 1 [Source:MGI Symbol;Acc:MGI:97275]
ENSMUSG00000009487	0.18268	-1.24442	6.1504	-0.202331	0.839658	NA	Otog	otogelin [Source:MGI Symbol;Acc:MGI:1202064]
ENSMUSG00000009535	8.7313	-1.89834	2.00165	-0.948388	0.342932	0.697908	Rnmt	RNA (guanine-7-) methyltransferase [Source:MGI Symbol;Acc:MGI:1915147]
ENSMUSG00000009545	4.98546	0.195925	2.49312	0.0785862	0.937362	0.979418	Kcnq1	potassium voltage-gated channel, subfamily Q, member 1 [Source:MGI Symbol;Acc:MGI:108083]
ENSMUSG00000009549	185.561	-2.31851	1.72389	-1.34493	0.178649	0.517027	Srp14	signal recognition particle 14 [Source:MGI Symbol;Acc:MGI:107169]
ENSMUSG00000009555	3.1407	2.51641	3.59687	0.69961	0.484171	NA	Cdk9	cyclin dependent kinase 9 [Source:MGI Symbol;Acc:MGI:1328368]
ENSMUSG00000009563	1.73322	0.0118941	3.92296	0.00303193	0.997581	NA	Tor2a	torsin family 2, member A [Source:MGI Symbol;Acc:MGI:1353596]
ENSMUSG00000009566	10.9161	-3.18176	2.05154	-1.55091	0.120923	0.421266	Fpgs	folylpolyglutamyl synthetase [Source:MGI Symbol;Acc:MGI:95576]
ENSMUSG00000009569	8.08313	0.775678	2.00604	0.386671	0.699	0.905105	Mrtfb	myocardin related transcription factor B [Source:MGI Symbol;Acc:MGI:3050795]
ENSMUSG00000009575	36.0055	-0.938895	1.768	-0.531048	0.595385	0.862617	Cbx5	chromobox 5 [Source:MGI Symbol;Acc:MGI:109372]
ENSMUSG00000009580	0.232528	0.81631	6.21592	0.131326	0.895518	NA	Odam	odontogenic, ameloblast asssociated [Source:MGI Symbol;Acc:MGI:1916842]
ENSMUSG00000009585	0.486391	3.87046	6.16843	0.627462	0.530356	NA	Apobec3	apolipoprotein B mRNA editing enzyme, catalytic polypeptide 3 [Source:MGI Symbol;Acc:MGI:1933111]
ENSMUSG00000009588	0.353001	3.71162	6.21948	0.596774	0.550658	NA	St6galnac1	ST6 (alpha-N-acetyl-neuraminyl-2,3-beta-galactosyl-1,3)-N-acetylgalactosaminide alpha-2,6-sialyltransferase 1 [Source:MGI Symbol;Acc:MGI:1341826]
ENSMUSG00000009596	73.9343	-1.79689	0.982993	-1.82798	0.0675521	0.301561	Taf7l	TATA-box binding protein associated factor 7 like [Source:MGI Symbol;Acc:MGI:1921719]
ENSMUSG00000009614	0.36166	-1.66653	6.14473	-0.271213	0.786228	NA	Sardh	sarcosine dehydrogenase [Source:MGI Symbol;Acc:MGI:2183102]
ENSMUSG00000009621	10.0052	-0.351048	1.42139	-0.246975	0.804927	0.940435	Vav2	vav 2 oncogene [Source:MGI Symbol;Acc:MGI:102718]
ENSMUSG00000009628	440.211	-1.86667	0.361333	-5.16608	2.39e-07	7.31e-06	Tex15	testis expressed gene 15 [Source:MGI Symbol;Acc:MGI:1934816]
ENSMUSG00000009630	124.871	2.19433	0.395274	5.55142	2.83e-08	1.04e-06	Ppp2cb	protein phosphatase 2 (formerly 2A), catalytic subunit, beta isoform [Source:MGI Symbol;Acc:MGI:1321161]
ENSMUSG00000009633	0.663593	-0.615758	6.11115	-0.10076	0.919741	NA	G0s2	G0/G1 switch gene 2 [Source:MGI Symbol;Acc:MGI:1316737]
ENSMUSG00000009640	48.935	-1.52421	1.7287	-0.881713	0.377932	0.726912	Dmap1	DNA methyltransferase 1-associated protein 1 [Source:MGI Symbol;Acc:MGI:1913483]
ENSMUSG00000009646	0.184132	3.63859	6.21697	0.585268	0.558368	NA	Pla2g12b	phospholipase A2, group XIIB [Source:MGI Symbol;Acc:MGI:1917086]
ENSMUSG00000009647	11.7788	0.117408	1.70669	0.0687929	0.945155	0.98247	Mcu	mitochondrial calcium uniporter [Source:MGI Symbol;Acc:MGI:3026965]
ENSMUSG00000009654	1.47112	0.85048	3.53334	0.240702	0.809786	NA	Oit3	oncoprotein induced transcript 3 [Source:MGI Symbol;Acc:MGI:1201782]
ENSMUSG00000009670	32.0553	-2.63407	1.8865	-1.39627	0.162633	0.489655	Tex11	testis expressed gene 11 [Source:MGI Symbol;Acc:MGI:1933237]
ENSMUSG00000009681	24.7705	0.706273	0.617151	1.14441	0.252454	0.607213	Bcr	BCR activator of RhoGEF and GTPase [Source:MGI Symbol;Acc:MGI:88141]
ENSMUSG00000009687	2.60198	-1.76506	3.53878	-0.498775	0.617938	NA	Fxyd5	FXYD domain-containing ion transport regulator 5 [Source:MGI Symbol;Acc:MGI:1201785]
ENSMUSG00000009731	3.68094	2.24777	2.68894	0.835933	0.403192	NA	Kcnd1	potassium voltage-gated channel, Shal-related family, member 1 [Source:MGI Symbol;Acc:MGI:96671]
ENSMUSG00000009733	4.64338	0.860378	2.52494	0.340752	0.73329	NA	Tfcp2	transcription factor CP2 [Source:MGI Symbol;Acc:MGI:98509]
ENSMUSG00000009734	6.84261	7.23091	1.64519	4.39519	1.11e-05	0.000243356	Pou6f2	POU domain, class 6, transcription factor 2 [Source:MGI Symbol;Acc:MGI:2443631]
ENSMUSG00000009739	5.21681	1.30918	2.21039	0.592285	0.55366	0.844604	Pou6f1	POU domain, class 6, transcription factor 1 [Source:MGI Symbol;Acc:MGI:102935]
ENSMUSG00000009741	18.2638	1.78338	1.84762	0.965231	0.334429	0.691263	Ubp1	upstream binding protein 1 [Source:MGI Symbol;Acc:MGI:104889]
ENSMUSG00000009772	0.294242	-2.29794	6.13419	-0.374611	0.707949	NA	Nuak2	NUAK family, SNF1-like kinase, 2 [Source:MGI Symbol;Acc:MGI:1921387]
ENSMUSG00000009828	2.94666	-1.00423	2.44424	-0.410854	0.681179	NA	Cilk1	ciliogenesis associated kinase 1 [Source:MGI Symbol;Acc:MGI:1934157]
ENSMUSG00000009863	101.152	-1.45451	0.698821	-2.08138	0.0373993	0.204636	Sdhb	succinate dehydrogenase complex, subunit B, iron sulfur (Ip) [Source:MGI Symbol;Acc:MGI:1914930]
ENSMUSG00000009876	2.46047	-0.563073	3.12523	-0.18017	0.857019	NA	Cox4i2	cytochrome c oxidase subunit 4I2 [Source:MGI Symbol;Acc:MGI:2135755]
ENSMUSG00000009894	25.212	0.10939	0.936814	0.116768	0.907044	0.969947	Snap47	synaptosomal-associated protein, 47 [Source:MGI Symbol;Acc:MGI:1915076]
ENSMUSG00000009900	5.94111	4.01994	2.31764	1.7345	0.0828293	0.339026	Wnt3a	wingless-type MMTV integration site family, member 3A [Source:MGI Symbol;Acc:MGI:98956]
ENSMUSG00000009905	2.39947	-1.79695	2.75191	-0.652984	0.513767	NA	Kdsr	3-ketodihydrosphingosine reductase [Source:MGI Symbol;Acc:MGI:1918000]
ENSMUSG00000009907	8.43691	0.461748	1.32936	0.347347	0.728331	0.917326	Vps4b	vacuolar protein sorting 4B [Source:MGI Symbol;Acc:MGI:1100499]
ENSMUSG00000009927	25.0435	4.28819	1.60566	2.67068	0.00756978	0.0647127	Rps25	ribosomal protein S25 [Source:MGI Symbol;Acc:MGI:1922867]
ENSMUSG00000009941	51.7463	-3.20887	1.78864	-1.79402	0.0728094	0.315641	Nxf2	nuclear RNA export factor 2 [Source:MGI Symbol;Acc:MGI:1933192]
ENSMUSG00000009995	0.595574	-3.43714	6.12678	-0.561002	0.574796	NA	Tafazzin	tafazzin, phospholipid-lysophospholipid transacylase [Source:MGI Symbol;Acc:MGI:109626]
ENSMUSG00000010021	9.86652	1.38419	2.19697	0.630045	0.528665	0.831978	Kif19a	kinesin family member 19A [Source:MGI Symbol;Acc:MGI:2447024]
ENSMUSG00000010025	11.8208	-1.69439	1.93433	-0.875954	0.381055	0.728443	Aldh3a2	aldehyde dehydrogenase family 3, subfamily A2 [Source:MGI Symbol;Acc:MGI:1353452]
ENSMUSG00000010044	155.588	0.213544	1.03046	0.207232	0.835829	0.950485	Zmynd10	zinc finger, MYND domain containing 10 [Source:MGI Symbol;Acc:MGI:2387863]
ENSMUSG00000010045	57.4322	1.62514	0.55554	2.92533	0.0034409	0.0345002	Tmem115	transmembrane protein 115 [Source:MGI Symbol;Acc:MGI:1930765]
ENSMUSG00000010047	1.23205	2.89556	6.06921	0.477089	0.633298	NA	Hyal2	hyaluronoglucosaminidase 2 [Source:MGI Symbol;Acc:MGI:1196334]
ENSMUSG00000010048	12.6074	2.52407	2.05543	1.228	0.219447	0.56692	Ifrd2	interferon-related developmental regulator 2 [Source:MGI Symbol;Acc:MGI:1316708]
ENSMUSG00000010051	0	NA	NA	NA	NA	NA	Hyal1	hyaluronoglucosaminidase 1 [Source:MGI Symbol;Acc:MGI:96298]
ENSMUSG00000010054	4.85757	0.195862	2.04186	0.0959232	0.923582	0.975585	Tusc2	tumor suppressor 2, mitochondrial calcium regulator [Source:MGI Symbol;Acc:MGI:1931086]
ENSMUSG00000010057	13.7343	-0.815473	1.98118	-0.411609	0.680626	0.897159	Nprl2	NPR2 like, GATOR1 complex subunit [Source:MGI Symbol;Acc:MGI:1914482]
ENSMUSG00000010064	0.0920659	3.16027	6.23148	0.507147	0.612052	NA	Slc38a3	solute carrier family 38, member 3 [Source:MGI Symbol;Acc:MGI:1923507]
ENSMUSG00000010066	3.39372	-0.275375	2.48917	-0.110629	0.911911	NA	Cacna2d2	calcium channel, voltage-dependent, alpha 2/delta subunit 2 [Source:MGI Symbol;Acc:MGI:1929813]
ENSMUSG00000010067	7.47541	2.05436	1.71043	1.20108	0.229722	0.579941	Rassf1	Ras association (RalGDS/AF-6) domain family member 1 [Source:MGI Symbol;Acc:MGI:1928386]
ENSMUSG00000010080	1.39706	1.16506	5.71135	0.20399	0.838361	NA	Epn3	epsin 3 [Source:MGI Symbol;Acc:MGI:1919139]
ENSMUSG00000010086	5.19381	-0.18439	3.18558	-0.0578827	0.953842	0.984382	Rnf112	ring finger protein 112 [Source:MGI Symbol;Acc:MGI:106611]
ENSMUSG00000010095	42.9328	-0.11574	1.7281	-0.0669753	0.946601	0.982773	Slc3a2	solute carrier family 3 (activators of dibasic and neutral amino acid transport), member 2 [Source:MGI Symbol;Acc:MGI:96955]
ENSMUSG00000010097	111.176	-0.894475	1.66328	-0.537777	0.590731	0.860858	Nxf1	nuclear RNA export factor 1 [Source:MGI Symbol;Acc:MGI:1858330]
ENSMUSG00000010110	6.77842	3.73811	1.97438	1.89331	0.0583172	0.275419	Stx5a	syntaxin 5A [Source:MGI Symbol;Acc:MGI:1928483]
ENSMUSG00000010122	0	NA	NA	NA	NA	NA	Slc47a1	solute carrier family 47, member 1 [Source:MGI Symbol;Acc:MGI:1914723]
ENSMUSG00000010136	162.918	0.403992	0.314522	1.28446	0.19898	0.541589	Cimap3	ciliary microtubule associated protein 3 [Source:MGI Symbol;Acc:MGI:1923670]
ENSMUSG00000010142	0.717996	3.69333	6.18123	0.597508	0.550168	NA	Tnfrsf13b	tumor necrosis factor receptor superfamily, member 13b [Source:MGI Symbol;Acc:MGI:1889411]
ENSMUSG00000010154	24.908	0.0897167	1.51117	0.0593689	0.952658	0.984382	Spire2	spire type actin nucleation factor 2 [Source:MGI Symbol;Acc:MGI:2446256]
ENSMUSG00000010175	3.23778	1.60846	2.7976	0.574942	0.56533	NA	Prox1	prospero homeobox 1 [Source:MGI Symbol;Acc:MGI:97772]
ENSMUSG00000010205	0	NA	NA	NA	NA	NA	Raver1	ribonucleoprotein, PTB-binding 1 [Source:MGI Symbol;Acc:MGI:1919016]
ENSMUSG00000010277	366.595	0.754182	0.204646	3.6853	0.000228431	0.00360569	Bltp2	bridge-like lipid transfer protein family member 2 [Source:MGI Symbol;Acc:MGI:1919753]
ENSMUSG00000010290	21.9155	-1.56262	1.27228	-1.2282	0.21937	0.56692	AI597479	expressed sequence AI597479 [Source:MGI Symbol;Acc:MGI:2138299]
ENSMUSG00000010307	5.28496	0.158932	1.33976	0.118627	0.905571	0.969459	Tmem86a	transmembrane protein 86A [Source:MGI Symbol;Acc:MGI:1915143]
ENSMUSG00000010311	0.18083	-0.732027	6.16612	-0.118717	0.905499	NA	Optc	opticin [Source:MGI Symbol;Acc:MGI:2151113]
ENSMUSG00000010342	149.092	-0.0466307	0.470735	-0.0990594	0.921091	0.97528	Tex14	testis expressed gene 14 [Source:MGI Symbol;Acc:MGI:1933227]
ENSMUSG00000010358	0.707884	3.88891	6.15052	0.63229	0.527197	NA	Ifi35	interferon-induced protein 35 [Source:MGI Symbol;Acc:MGI:1917360]
ENSMUSG00000010362	0.727362	1.67823	6.11424	0.274479	0.783716	NA	Rdm1	RAD52 motif 1 [Source:MGI Symbol;Acc:MGI:1913849]
ENSMUSG00000010376	40.0258	-1.52059	0.596896	-2.54749	0.0108501	0.0856613	Nedd8	neural precursor cell expressed, developmentally down-regulated gene 8 [Source:MGI Symbol;Acc:MGI:97301]
ENSMUSG00000010392	54.1365	-1.99934	0.567034	-3.52596	0.000421954	0.00621429	Gosr1	golgi SNAP receptor complex member 1 [Source:MGI Symbol;Acc:MGI:1858260]
ENSMUSG00000010406	7.05088	-1.02727	3.02203	-0.339926	0.733912	0.919403	Mrpl52	mitochondrial ribosomal protein L52 [Source:MGI Symbol;Acc:MGI:1916086]
ENSMUSG00000010435	78.6194	-1.72905	1.71564	-1.00782	0.313542	0.672372	Spaca7	sperm acrosome associated 7 [Source:MGI Symbol;Acc:MGI:1925884]
ENSMUSG00000010453	25.2883	1.92765	1.84727	1.04351	0.296711	0.655009	Kansl3	KAT8 regulatory NSL complex subunit 3 [Source:MGI Symbol;Acc:MGI:1918055]
ENSMUSG00000010461	63.0742	5.97424	1.61908	3.6899	0.00022434	0.00355299	Eya4	EYA transcriptional coactivator and phosphatase 4 [Source:MGI Symbol;Acc:MGI:1337104]
ENSMUSG00000010476	0.0658269	0.349271	6.20791	0.0562622	0.955133	NA	Ebf3	early B cell factor 3 [Source:MGI Symbol;Acc:MGI:894289]
ENSMUSG00000010505	9.46222	-4.42371	1.92441	-2.29874	0.0215198	0.139554	Myt1	myelin transcription factor 1 [Source:MGI Symbol;Acc:MGI:1100535]
ENSMUSG00000010517	80.3367	0.928343	0.401626	2.31146	0.0208075	0.136802	Faf1	Fas-associated factor 1 [Source:MGI Symbol;Acc:MGI:109419]
ENSMUSG00000010529	1.55953	3.59104	3.92516	0.914877	0.360256	NA	Gm266	predicted gene 266 [Source:MGI Symbol;Acc:MGI:2685112]
ENSMUSG00000010538	23.0854	3.06914	1.85477	1.65473	0.0979793	0.372046	Tsacc	TSSK6 activating co-chaperone [Source:MGI Symbol;Acc:MGI:1924177]
ENSMUSG00000010554	9.69492	-1.95837	1.96231	-0.997994	0.318283	0.674648	Mettl16	methyltransferase 16, N6-methyladenosine [Source:MGI Symbol;Acc:MGI:1914743]
ENSMUSG00000010592	68.2222	-2.37712	1.72297	-1.37966	0.16769	0.498764	Dazl	deleted in azoospermia-like [Source:MGI Symbol;Acc:MGI:1342328]
ENSMUSG00000010601	0	NA	NA	NA	NA	NA	Apol7a	apolipoprotein L 7a [Source:MGI Symbol;Acc:MGI:1923011]
ENSMUSG00000010607	0.826044	-2.25081	6.01871	-0.373968	0.708428	NA	Pigyl	phosphatidylinositol glycan anchor biosynthesis, class Y-like [Source:MGI Symbol;Acc:MGI:1913518]
ENSMUSG00000010608	173.234	-1.01662	0.782844	-1.29863	0.194072	0.53663	Rbm25	RNA binding motif protein 25 [Source:MGI Symbol;Acc:MGI:1914289]
ENSMUSG00000010609	0.435825	0.751721	6.13217	0.122586	0.902435	NA	Psen2	presenilin 2 [Source:MGI Symbol;Acc:MGI:109284]
ENSMUSG00000010651	26.1662	2.8486	1.87215	1.52157	0.128117	0.433088	Acaa1b	acetyl-Coenzyme A acyltransferase 1B [Source:MGI Symbol;Acc:MGI:3605455]
ENSMUSG00000010660	4.01544	-0.0888079	3.17688	-0.0279544	0.977698	NA	Plcd1	phospholipase C, delta 1 [Source:MGI Symbol;Acc:MGI:97614]
ENSMUSG00000010663	1.64323	1.40497	4.98698	0.281727	0.778153	NA	Fads1	fatty acid desaturase 1 [Source:MGI Symbol;Acc:MGI:1923517]
ENSMUSG00000010721	8.28602	-0.919263	2.05828	-0.446616	0.655152	0.885556	Lmbr1	limb region 1 [Source:MGI Symbol;Acc:MGI:1861746]
ENSMUSG00000010751	0	NA	NA	NA	NA	NA	Tnfrsf22	tumor necrosis factor receptor superfamily, member 22 [Source:MGI Symbol;Acc:MGI:1930270]
ENSMUSG00000010755	28.9504	-1.99958	1.77374	-1.12732	0.259606	0.614984	Cars1	cysteinyl-tRNA synthetase 1 [Source:MGI Symbol;Acc:MGI:1351477]
ENSMUSG00000010760	0.261939	3.90993	6.21033	0.629585	0.528966	NA	Phlda2	pleckstrin homology like domain, family A, member 2 [Source:MGI Symbol;Acc:MGI:1202307]
ENSMUSG00000010796	12.1463	-0.686882	2.03175	-0.338074	0.735307	0.920229	Asz1	ankyrin repeat, SAM and basic leucine zipper domain containing 1 [Source:MGI Symbol;Acc:MGI:1921318]
ENSMUSG00000010797	9.08755	1.94592	1.63419	1.19076	0.233749	0.58427	Wnt2	wingless-type MMTV integration site family, member 2 [Source:MGI Symbol;Acc:MGI:98954]
ENSMUSG00000010803	1.17035	-0.778728	5.53253	-0.140754	0.888064	NA	Gabra1	gamma-aminobutyric acid type A receptor subunit alpha 1 [Source:MGI Symbol;Acc:MGI:95613]
ENSMUSG00000010825	0	NA	NA	NA	NA	NA	Grid2ip	glutamate receptor, ionotropic, delta 2 (Grid2) interacting protein 1 [Source:MGI Symbol;Acc:MGI:2176213]
ENSMUSG00000010830	17.4597	2.65478	1.93973	1.36864	0.171113	0.504953	Kdelr3	KDEL (Lys-Asp-Glu-Leu) endoplasmic reticulum protein retention receptor 3 [Source:MGI Symbol;Acc:MGI:2145953]
ENSMUSG00000010841	27.7563	-0.810946	1.42125	-0.570587	0.568279	0.852697	Cfap97d1	CFAP97 domain containing 1 [Source:MGI Symbol;Acc:MGI:1922687]
ENSMUSG00000010911	14.078	3.13474	1.65769	1.89103	0.0586199	0.276572	Apip	APAF1 interacting protein [Source:MGI Symbol;Acc:MGI:1926788]
ENSMUSG00000010914	65.4475	-0.650536	0.413116	-1.57471	0.115324	0.410849	Pdhx	pyruvate dehydrogenase complex, component X [Source:MGI Symbol;Acc:MGI:1351627]
ENSMUSG00000010936	2.24536	0.366283	3.83059	0.0956206	0.923822	NA	Vac14	Vac14 homolog (S. cerevisiae) [Source:MGI Symbol;Acc:MGI:2157980]
ENSMUSG00000011008	0.523877	4.55769	6.18934	0.736377	0.461502	NA	Mcoln2	mucolipin 2 [Source:MGI Symbol;Acc:MGI:1915529]
ENSMUSG00000011034	0.164991	3.17449	6.23278	0.509322	0.610526	NA	Slc5a1	solute carrier family 5 (sodium/glucose cotransporter), member 1 [Source:MGI Symbol;Acc:MGI:107678]
ENSMUSG00000011096	6.15599	-0.358583	2.06724	-0.17346	0.86229	0.960074	Akt1s1	AKT1 substrate 1 [Source:MGI Symbol;Acc:MGI:1914855]
ENSMUSG00000011114	132.556	-0.649585	0.689242	-0.942463	0.345956	0.699657	Tbrg1	transforming growth factor beta regulated gene 1 [Source:MGI Symbol;Acc:MGI:1100877]
ENSMUSG00000011118	0.417501	4.77032	6.18947	0.770717	0.440875	NA	Panx3	pannexin 3 [Source:MGI Symbol;Acc:MGI:1918881]
ENSMUSG00000011148	0.68055	0.0557876	6.07035	0.00919017	0.992667	NA	Adss1	adenylosuccinate synthase 1 [Source:MGI Symbol;Acc:MGI:87947]
ENSMUSG00000011154	215.488	-2.46414	1.69026	-1.45785	0.144882	0.460766	Cfap161	cilia and flagella associated protein 161 [Source:MGI Symbol;Acc:MGI:1922806]
ENSMUSG00000011158	43.1935	-0.95781	0.601975	-1.59111	0.111584	0.402529	Brf1	BRF1, RNA polymerase III transcription initiation factor 90 kDa subunit [Source:MGI Symbol;Acc:MGI:1919558]
ENSMUSG00000011171	0.164991	3.17449	6.23278	0.509322	0.610526	NA	Vipr2	vasoactive intestinal peptide receptor 2 [Source:MGI Symbol;Acc:MGI:107166]
ENSMUSG00000011179	10.3998	3.81629	1.99318	1.91467	0.0555341	0.26735	Odc1	ornithine decarboxylase, structural 1 [Source:MGI Symbol;Acc:MGI:97402]
ENSMUSG00000011254	5.46808	-2.27967	2.96325	-0.769314	0.441707	0.778587	Thg1l	tRNA-histidine guanylyltransferase 1-like (S. cerevisiae) [Source:MGI Symbol;Acc:MGI:1913878]
ENSMUSG00000011256	1.44427	3.33241	3.37579	0.987147	0.32357	NA	Adam19	ADAM metallopeptidase domain 19 [Source:MGI Symbol;Acc:MGI:105377]
ENSMUSG00000011257	0.255907	-2.05905	6.13661	-0.335536	0.737221	NA	Pabpc4	poly(A) binding protein, cytoplasmic 4 [Source:MGI Symbol;Acc:MGI:2385206]
ENSMUSG00000011263	13.6081	-0.46919	0.89446	-0.524551	0.599895	0.864709	Exoc3l2	exocyst complex component 3-like 2 [Source:MGI Symbol;Acc:MGI:1921713]
ENSMUSG00000011267	7.97186	-0.948779	1.76778	-0.536707	0.59147	0.861523	Zfp296	zinc finger protein 296 [Source:MGI Symbol;Acc:MGI:1926956]
ENSMUSG00000011305	0.195502	3.7209	6.21979	0.598236	0.549682	NA	Plin5	perilipin 5 [Source:MGI Symbol;Acc:MGI:1914218]
ENSMUSG00000011306	115.581	-0.480438	0.34047	-1.4111	0.158215	0.485689	Sugp1	SURP and G patch domain containing 1 [Source:MGI Symbol;Acc:MGI:1917866]
ENSMUSG00000011349	161.281	0.415548	0.323575	1.28424	0.199059	0.541589	Dmrtc2	doublesex and mab-3 related transcription factor like family C2 [Source:MGI Symbol;Acc:MGI:1918491]
ENSMUSG00000011350	90.9458	4.99026	1.71122	2.9162	0.00354323	0.0353016	Gm5893	predicted gene 5893 [Source:MGI Symbol;Acc:MGI:3645761]
ENSMUSG00000011382	2.85561	2.32303	2.76436	0.840347	0.400714	NA	Dhdh	dihydrodiol dehydrogenase [Source:MGI Symbol;Acc:MGI:1919005]
ENSMUSG00000011427	0.413202	1.16859	6.12545	0.190776	0.848701	NA	Zfp790	zinc finger protein 790 [Source:MGI Symbol;Acc:MGI:1923431]
ENSMUSG00000011463	0	NA	NA	NA	NA	NA	Cpb1	carboxypeptidase B1 [Source:MGI Symbol;Acc:MGI:1923953]
ENSMUSG00000011486	7.15937	-0.752288	2.03956	-0.368849	0.71224	0.910036	Slc25a41	solute carrier family 25, member 41 [Source:MGI Symbol;Acc:MGI:2144215]
ENSMUSG00000011589	1.74594	6.3098	3.6919	1.70909	0.0874338	NA	Fsd1	fibronectin type 3 and SPRY domain-containing protein [Source:MGI Symbol;Acc:MGI:1934858]
ENSMUSG00000011632	7.33301	-1.56883	2.00816	-0.781228	0.434669	0.772465	Pinlyp	phospholipase A2 inhibitor and LY6/PLAUR domain containing [Source:MGI Symbol;Acc:MGI:3615324]
ENSMUSG00000011658	11.4204	-0.109543	1.95237	-0.0561079	0.955256	0.984382	Fuz	fuzzy planar cell polarity protein [Source:MGI Symbol;Acc:MGI:1917550]
ENSMUSG00000011751	28.4063	0.538423	1.76332	0.305345	0.760103	0.927679	Sptbn4	spectrin beta, non-erythrocytic 4 [Source:MGI Symbol;Acc:MGI:1890574]
ENSMUSG00000011752	1.77385	3.0721	3.82119	0.803964	0.421418	NA	Pgam1	phosphoglycerate mutase 1 [Source:MGI Symbol;Acc:MGI:97552]
ENSMUSG00000011831	8.89256	1.19126	1.15319	1.03301	0.301601	0.660713	Evi5	ecotropic viral integration site 5 [Source:MGI Symbol;Acc:MGI:104736]
ENSMUSG00000011832	57.1203	2.35407	1.8294	1.2868	0.198164	0.540421	Evi5l	ecotropic viral integration site 5 like [Source:MGI Symbol;Acc:MGI:2442167]
ENSMUSG00000011837	2.07437	-0.449552	3.66917	-0.122522	0.902486	NA	Snapc2	small nuclear RNA activating complex, polypeptide 2 [Source:MGI Symbol;Acc:MGI:1914861]
ENSMUSG00000011877	552.214	4.11896	1.67812	2.45451	0.0141077	0.102779	Git1	GIT ArfGAP 1 [Source:MGI Symbol;Acc:MGI:1927140]
ENSMUSG00000011884	0	NA	NA	NA	NA	NA	Gltp	glycolipid transfer protein [Source:MGI Symbol;Acc:MGI:1929253]
ENSMUSG00000011958	13.5525	-0.187271	2.02148	-0.0926402	0.926189	0.976458	Bnip2	BCL2/adenovirus E1B interacting protein 2 [Source:MGI Symbol;Acc:MGI:109327]
ENSMUSG00000011960	8.85492	-1.36855	2.52619	-0.541744	0.587995	0.860146	Ccnt1	cyclin T1 [Source:MGI Symbol;Acc:MGI:1328363]
ENSMUSG00000012017	0	NA	NA	NA	NA	NA	Scarf2	scavenger receptor class F, member 2 [Source:MGI Symbol;Acc:MGI:1858430]
ENSMUSG00000012042	70.2136	-2.78211	1.3276	-2.09559	0.0361184	0.199474	4930579F01Rik	RIKEN cDNA 4930579F01 gene [Source:MGI Symbol;Acc:MGI:1914991]
ENSMUSG00000012076	2.48959	0.920364	2.04545	0.449957	0.652741	NA	Brms1l	breast cancer metastasis-suppressor 1-like [Source:MGI Symbol;Acc:MGI:1196337]
ENSMUSG00000012114	26.2623	-0.846161	1.78108	-0.475082	0.634728	0.879062	Med15	mediator complex subunit 15 [Source:MGI Symbol;Acc:MGI:2137379]
ENSMUSG00000012117	11.1604	0.308893	1.96204	0.157435	0.874902	0.962229	Dhdds	dehydrodolichyl diphosphate synthase [Source:MGI Symbol;Acc:MGI:1914672]
ENSMUSG00000012123	1.62533	1.57442	4.23915	0.371399	0.71034	NA	Crybg2	crystallin beta-gamma domain containing 2 [Source:MGI Symbol;Acc:MGI:1334463]
ENSMUSG00000012126	227.921	2.80215	0.505386	5.54457	2.95e-08	1.07e-06	Ubxn11	UBX domain protein 11 [Source:MGI Symbol;Acc:MGI:1914836]
ENSMUSG00000012187	0.18083	-0.732027	6.16612	-0.118717	0.905499	NA	Mogat1	monoacylglycerol O-acyltransferase 1 [Source:MGI Symbol;Acc:MGI:1915643]
ENSMUSG00000012211	65.8247	0.559686	1.18834	0.470979	0.637655	0.879588	Tex22	testis expressed gene 22 [Source:MGI Symbol;Acc:MGI:1922921]
ENSMUSG00000012282	1.09005	3.41075	5.7845	0.589636	0.555435	NA	Wnt8a	wingless-type MMTV integration site family, member 8A [Source:MGI Symbol;Acc:MGI:107924]
ENSMUSG00000012296	9.28184	0.146834	2.07172	0.0708757	0.943497	0.981866	Tjap1	tight junction associated protein 1 [Source:MGI Symbol;Acc:MGI:1921344]
ENSMUSG00000012350	0	NA	NA	NA	NA	NA	Ehf	ets homologous factor [Source:MGI Symbol;Acc:MGI:1270840]
ENSMUSG00000012396	0	NA	NA	NA	NA	NA	Nanog	Nanog homeobox [Source:MGI Symbol;Acc:MGI:1919200]
ENSMUSG00000012405	0.261939	3.90993	6.21033	0.629585	0.528966	NA	Rpl15	ribosomal protein L15 [Source:MGI Symbol;Acc:MGI:1913730]
ENSMUSG00000012422	0.661481	1.32442	6.11162	0.216706	0.828438	NA	Tmem167	transmembrane protein 167 [Source:MGI Symbol;Acc:MGI:1913324]
ENSMUSG00000012428	1.15968	-0.291196	4.38336	-0.0664322	0.947034	NA	Steap4	STEAP family member 4 [Source:MGI Symbol;Acc:MGI:1923560]
ENSMUSG00000012429	4.73449	-2.42591	3.24111	-0.748481	0.45417	NA	Mplkip	M-phase specific PLK1 intereacting protein [Source:MGI Symbol;Acc:MGI:1913558]
ENSMUSG00000012443	52.7956	-0.324018	0.472396	-0.685905	0.492773	0.811282	Kif11	kinesin family member 11 [Source:MGI Symbol;Acc:MGI:1098231]
ENSMUSG00000012483	2.29798	1.8191	2.54078	0.715959	0.474017	NA	Rpa3	replication protein A3 [Source:MGI Symbol;Acc:MGI:1915490]
ENSMUSG00000012519	4.76409	5.64757	3.02931	1.86431	0.0622782	0.286959	Mlkl	mixed lineage kinase domain-like [Source:MGI Symbol;Acc:MGI:1921818]
ENSMUSG00000012520	0	NA	NA	NA	NA	NA	Phox2b	paired-like homeobox 2b [Source:MGI Symbol;Acc:MGI:1100882]
ENSMUSG00000012535	18.1363	0.0756201	1.22853	0.0615532	0.950919	0.983949	Tnpo3	transportin 3 [Source:MGI Symbol;Acc:MGI:1196412]
ENSMUSG00000012609	85.0831	0.414888	1.73038	0.239766	0.810512	0.942056	Ttll5	tubulin tyrosine ligase-like family, member 5 [Source:MGI Symbol;Acc:MGI:2443657]
ENSMUSG00000012640	8.53338	-1.43686	2.30056	-0.624569	0.532254	0.834156	Zfp715	zinc finger protein 715 [Source:MGI Symbol;Acc:MGI:1917180]
ENSMUSG00000012705	0	NA	NA	NA	NA	NA	Retn	resistin [Source:MGI Symbol;Acc:MGI:1888506]
ENSMUSG00000012777	6.89121	-0.394478	2.08537	-0.189165	0.849964	0.955977	Acp4	acid phosphatase 4 [Source:MGI Symbol;Acc:MGI:3644563]
ENSMUSG00000012819	26.4222	0.29557	1.86445	0.158529	0.87404	0.962229	Cdh23	cadherin related 23 (otocadherin) [Source:MGI Symbol;Acc:MGI:1890219]
ENSMUSG00000012848	35.4367	1.81021	1.79998	1.00568	0.314569	0.672784	Rps5	ribosomal protein S5 [Source:MGI Symbol;Acc:MGI:1097682]
ENSMUSG00000012889	0.397518	1.87717	6.20626	0.302464	0.762298	NA	Podnl1	podocan-like 1 [Source:MGI Symbol;Acc:MGI:2685352]
ENSMUSG00000013033	2.9276	0.0388235	2.49286	0.0155739	0.987574	NA	Adgrl1	adhesion G protein-coupled receptor L1 [Source:MGI Symbol;Acc:MGI:1929461]
ENSMUSG00000013076	85.1194	0.296518	0.39341	0.753713	0.451022	0.784147	Amotl1	angiomotin-like 1 [Source:MGI Symbol;Acc:MGI:1922973]
ENSMUSG00000013083	17.7858	-0.589412	1.82674	-0.322658	0.746954	0.922824	2200002J24Rik	RIKEN cDNA 2200002J24 gene [Source:MGI Symbol;Acc:MGI:1916397]
ENSMUSG00000013089	1.25845	6.60804	6.13565	1.07699	0.281484	NA	Etv5	ets variant 5 [Source:MGI Symbol;Acc:MGI:1096867]
ENSMUSG00000013091	210.747	-1.396	0.470293	-2.96836	0.00299391	0.0312789	Tmem190	transmembrane protein 190 [Source:MGI Symbol;Acc:MGI:1925302]
ENSMUSG00000013150	9.07328	2.77527	1.89597	1.46377	0.143255	0.457286	Gfod2	glucose-fructose oxidoreductase domain containing 2 [Source:MGI Symbol;Acc:MGI:1917825]
ENSMUSG00000013155	55.6345	-1.16059	1.71584	-0.676399	0.498787	0.81481	Enkd1	enkurin domain containing 1 [Source:MGI Symbol;Acc:MGI:2142593]
ENSMUSG00000013158	37.0194	-0.638615	1.73214	-0.368685	0.712363	0.910036	4933405L10Rik	RIKEN cDNA 4933405L10 gene [Source:MGI Symbol;Acc:MGI:1918296]
ENSMUSG00000013160	30.6609	0.349117	0.590378	0.591345	0.554289	0.844882	Atp6v0d1	ATPase, H+ transporting, lysosomal V0 subunit D1 [Source:MGI Symbol;Acc:MGI:1201778]
ENSMUSG00000013236	16.0623	0.473419	1.85553	0.25514	0.798615	0.938067	Ptprs	protein tyrosine phosphatase receptor type S [Source:MGI Symbol;Acc:MGI:97815]
ENSMUSG00000013275	12.7673	1.66074	1.13763	1.45982	0.14434	0.459971	Slc41a1	solute carrier family 41, member 1 [Source:MGI Symbol;Acc:MGI:2444823]
ENSMUSG00000013338	8.24434	-3.62035	1.54248	-2.3471	0.0189202	0.127143	Fer1l4	fer-1 like family member 4 [Source:MGI Symbol;Acc:MGI:1921812]
ENSMUSG00000013353	2.04077	-3.69369	2.45158	-1.50666	0.131899	NA	4931406B18Rik	RIKEN cDNA 4931406B18 gene [Source:MGI Symbol;Acc:MGI:1921304]
ENSMUSG00000013367	2.80413	6.05495	2.32777	2.60118	0.00929046	NA	Iglon5	IgLON family member 5 [Source:MGI Symbol;Acc:MGI:2686277]
ENSMUSG00000013415	13.7226	-0.903999	1.40311	-0.644282	0.519393	0.826257	Igf2bp1	insulin-like growth factor 2 mRNA binding protein 1 [Source:MGI Symbol;Acc:MGI:1890357]
ENSMUSG00000013418	5.93761	-0.209686	2.49247	-0.084128	0.932955	0.978816	B4galnt2	beta-1,4-N-acetyl-galactosaminyl transferase 2 [Source:MGI Symbol;Acc:MGI:1342058]
ENSMUSG00000013419	10.3262	-1.17229	1.10066	-1.06509	0.286837	0.643898	Zbtb47	zinc finger and BTB domain containing 47 [Source:MGI Symbol;Acc:MGI:2670992]
ENSMUSG00000013465	10.8651	-2.47462	1.98108	-1.24912	0.21162	0.560244	Nelfb	negative elongation factor complex member B [Source:MGI Symbol;Acc:MGI:1931035]
ENSMUSG00000013483	0.863662	0.444336	6.06648	0.0732444	0.941612	NA	Card14	caspase recruitment domain family, member 14 [Source:MGI Symbol;Acc:MGI:2386258]
ENSMUSG00000013495	25.9671	1.93723	0.882604	2.19491	0.0281704	0.16824	Tmem175	transmembrane protein 175 [Source:MGI Symbol;Acc:MGI:1919642]
ENSMUSG00000013523	3.11495	-1.51848	3.33695	-0.455051	0.649072	NA	Bcas1	brain enriched myelin associated protein 1 [Source:MGI Symbol;Acc:MGI:1924210]
ENSMUSG00000013539	0.661061	-3.40908	6.12706	-0.556398	0.577939	NA	Tango2	transport and golgi organization 2 [Source:MGI Symbol;Acc:MGI:101825]
ENSMUSG00000013584	147.262	-1.43234	0.267397	-5.3566	8.48e-08	2.85e-06	Aldh1a2	aldehyde dehydrogenase family 1, subfamily A2 [Source:MGI Symbol;Acc:MGI:107928]
ENSMUSG00000013593	112.351	-1.09518	1.70994	-0.640478	0.521862	0.827887	Ndufs2	NADH:ubiquinone oxidoreductase core subunit S2 [Source:MGI Symbol;Acc:MGI:2385112]
ENSMUSG00000013611	0.349251	4.14221	6.2045	0.667614	0.50438	NA	Snx31	sorting nexin 31 [Source:MGI Symbol;Acc:MGI:1913946]
ENSMUSG00000013622	5.70385	-0.685324	2.3111	-0.296536	0.766821	0.929515	Atraid	all-trans retinoic acid induced differentiation factor [Source:MGI Symbol;Acc:MGI:1918918]
ENSMUSG00000013629	26.7989	0.997103	1.66814	0.597732	0.550018	0.842729	Cad	carbamoyl-phosphate synthetase 2, aspartate transcarbamylase, and dihydroorotase [Source:MGI Symbol;Acc:MGI:1916969]
ENSMUSG00000013643	0	NA	NA	NA	NA	NA	Lypd8	LY6/PLAUR domain containing 8 [Source:MGI Symbol;Acc:MGI:1917413]
ENSMUSG00000013646	1.21901	0.274115	5.68395	0.0482261	0.961536	NA	Sh3bp5l	SH3 binding domain protein 5 like [Source:MGI Symbol;Acc:MGI:1933124]
ENSMUSG00000013653	30.966	-1.17463	2.00207	-0.586708	0.5574	0.845609	1810065E05Rik	RIKEN cDNA 1810065E05 gene [Source:MGI Symbol;Acc:MGI:1917114]
ENSMUSG00000013662	154.267	1.86396	1.69506	1.09964	0.271488	0.628201	Atad1	ATPase family, AAA domain containing 1 [Source:MGI Symbol;Acc:MGI:1915229]
ENSMUSG00000013663	122.361	1.85578	0.294654	6.29818	3.01e-10	1.42e-08	Pten	phosphatase and tensin homolog [Source:MGI Symbol;Acc:MGI:109583]
ENSMUSG00000013668	125.912	-0.74169	0.348031	-2.1311	0.0330808	0.187251	4933402N03Rik	RIKEN cDNA 4933402N03 gene [Source:MGI Symbol;Acc:MGI:1914681]
ENSMUSG00000013698	1.41915	4.26789	5.24463	0.813763	0.415781	NA	Pea15a	proliferation and apoptosis adaptor protein 15A [Source:MGI Symbol;Acc:MGI:104799]
ENSMUSG00000013701	0.348791	0.527229	6.21009	0.0848989	0.932342	NA	Timm23	translocase of inner mitochondrial membrane 23 [Source:MGI Symbol;Acc:MGI:1858317]
ENSMUSG00000013707	3.80171	1.94669	2.58248	0.753805	0.450966	NA	Tnfaip8l2	tumor necrosis factor, alpha-induced protein 8-like 2 [Source:MGI Symbol;Acc:MGI:1917019]
ENSMUSG00000013736	41.7084	0.172622	0.958381	0.180118	0.85706	0.958193	Trnt1	tRNA nucleotidyl transferase, CCA-adding, 1 [Source:MGI Symbol;Acc:MGI:1917297]
ENSMUSG00000013766	0.469264	3.00795	6.2039	0.484849	0.627784	NA	Ly6g6e	lymphocyte antigen 6 family member G6E [Source:MGI Symbol;Acc:MGI:1917524]
ENSMUSG00000013787	336.128	2.38269	1.68189	1.41667	0.156579	0.483491	Ehmt2	euchromatic histone lysine N-methyltransferase 2 [Source:MGI Symbol;Acc:MGI:2148922]
ENSMUSG00000013822	43.7867	1.50328	1.76851	0.850024	0.395312	0.741808	Elof1	ELF1 homolog, elongation factor 1 [Source:MGI Symbol;Acc:MGI:1913376]
ENSMUSG00000013833	69.2638	2.65825	1.52089	1.74782	0.080495	0.334835	Med16	mediator complex subunit 16 [Source:MGI Symbol;Acc:MGI:2158394]
ENSMUSG00000013846	0.195502	3.7209	6.21979	0.598236	0.549682	NA	St3gal1	ST3 beta-galactoside alpha-2,3-sialyltransferase 1 [Source:MGI Symbol;Acc:MGI:98304]
ENSMUSG00000013858	30.3429	-1.05538	1.56903	-0.672629	0.501183	0.815468	Tmem259	transmembrane protein 259 [Source:MGI Symbol;Acc:MGI:2177957]
ENSMUSG00000013878	2.59901	-2.63974	2.66003	-0.992375	0.321015	NA	Rnf170	ring finger protein 170 [Source:MGI Symbol;Acc:MGI:1924983]
ENSMUSG00000013921	2.78561	4.25006	2.67546	1.58853	0.112166	NA	Clip3	CAP-GLY domain containing linker protein 3 [Source:MGI Symbol;Acc:MGI:1923936]
ENSMUSG00000013936	0.589216	11.5421	6.10793	1.88968	0.0588004	NA	Myl2	myosin, light polypeptide 2, regulatory, cardiac, slow [Source:MGI Symbol;Acc:MGI:97272]
ENSMUSG00000013973	51.8368	0.317142	1.74459	0.181786	0.855751	0.957643	Dedd	death effector domain-containing [Source:MGI Symbol;Acc:MGI:1333874]
ENSMUSG00000013974	0.453515	3.12712	6.20431	0.504024	0.614245	NA	Mcemp1	mast cell expressed membrane protein 1 [Source:MGI Symbol;Acc:MGI:1916439]
ENSMUSG00000013997	303.597	0.635772	0.385287	1.65013	0.098917	0.374669	Nit1	nitrilase 1 [Source:MGI Symbol;Acc:MGI:1350916]
ENSMUSG00000014030	19.7484	2.09291	0.895321	2.33761	0.0194075	0.129816	Pax5	paired box 5 [Source:MGI Symbol;Acc:MGI:97489]
ENSMUSG00000014039	4.33358	-0.285445	2.60094	-0.109747	0.91261	NA	Prdm15	PR domain containing 15 [Source:MGI Symbol;Acc:MGI:1930121]
ENSMUSG00000014074	8.94231	-1.94461	2.08261	-0.933735	0.350441	0.703913	Rnf168	ring finger protein 168 [Source:MGI Symbol;Acc:MGI:1917488]
ENSMUSG00000014075	98.0002	-1.46927	1.70915	-0.859645	0.389985	0.737019	Dynlt2b	dynein light chain Tctex-type 2B [Source:MGI Symbol;Acc:MGI:1913311]
ENSMUSG00000014077	3.61689	0.197461	2.56131	0.0770935	0.938549	NA	Chp1	calcineurin-like EF hand protein 1 [Source:MGI Symbol;Acc:MGI:1927185]
ENSMUSG00000014104	0	NA	NA	NA	NA	NA	Sval2	seminal vesicle antigen-like 2 [Source:MGI Symbol;Acc:MGI:1934254]
ENSMUSG00000014158	0.140646	-0.401845	6.17743	-0.0650504	0.948134	NA	Trpv4	transient receptor potential cation channel, subfamily V, member 4 [Source:MGI Symbol;Acc:MGI:1926945]
ENSMUSG00000014164	1.5288	2.48425	4.60772	0.539149	0.589784	NA	Klhl3	kelch-like 3 [Source:MGI Symbol;Acc:MGI:2445185]
ENSMUSG00000014177	12.6268	-1.73252	1.27345	-1.3605	0.173673	0.509329	Tvp23b	trans-golgi network vesicle protein 23B [Source:MGI Symbol;Acc:MGI:1914760]
ENSMUSG00000014195	444.154	-0.719707	0.204896	-3.51255	0.000443831	0.00646599	Dnajc7	DnaJ heat shock protein family (Hsp40) member C7 [Source:MGI Symbol;Acc:MGI:1928373]
ENSMUSG00000014198	129.325	-0.0447338	2.20268	-0.0203088	0.983797	0.994845	Zfp385c	zinc finger protein 385C [Source:MGI Symbol;Acc:MGI:3608347]
ENSMUSG00000014226	20.9435	-0.854239	0.930654	-0.917891	0.358676	0.711258	Cacybp	calcyclin binding protein [Source:MGI Symbol;Acc:MGI:1270839]
ENSMUSG00000014232	68.7141	-0.208817	0.398679	-0.523772	0.600437	0.865021	Cluap1	clusterin associated protein 1 [Source:MGI Symbol;Acc:MGI:1924029]
ENSMUSG00000014243	41.4347	-0.115627	0.465911	-0.248174	0.804	0.940435	Zswim7	zinc finger SWIM-type containing 7 [Source:MGI Symbol;Acc:MGI:1916997]
ENSMUSG00000014245	7.1076	-1.89972	1.35741	-1.39952	0.161656	0.48882	Pigl	phosphatidylinositol glycan anchor biosynthesis, class L [Source:MGI Symbol;Acc:MGI:2681271]
ENSMUSG00000014294	99.1742	-0.998551	0.428642	-2.32957	0.019829	0.131845	Ndufa2	NADH:ubiquinone oxidoreductase subunit A2 [Source:MGI Symbol;Acc:MGI:1343103]
ENSMUSG00000014301	0.582632	5.7426	6.17424	0.93009	0.352325	NA	Pam16	presequence translocase-asssociated motor 16 [Source:MGI Symbol;Acc:MGI:1913699]
ENSMUSG00000014303	0.491505	-0.836624	6.1108	-0.136909	0.891103	NA	Glis2	GLIS family zinc finger 2 [Source:MGI Symbol;Acc:MGI:1932535]
ENSMUSG00000014313	66.0753	-1.40255	1.7123	-0.819104	0.412727	0.758876	Cox6c	cytochrome c oxidase subunit 6C [Source:MGI Symbol;Acc:MGI:104614]
ENSMUSG00000014329	2.24063	1.97963	3.73832	0.529551	0.596423	NA	Bicc1	BicC family RNA binding protein 1 [Source:MGI Symbol;Acc:MGI:1933388]
ENSMUSG00000014349	41.8859	-0.761236	0.651163	-1.16904	0.242388	0.595336	Ube2z	ubiquitin-conjugating enzyme E2Z [Source:MGI Symbol;Acc:MGI:1343160]
ENSMUSG00000014351	0.829398	-3.33697	6.12771	-0.54457	0.586049	NA	Gip	gastric inhibitory polypeptide [Source:MGI Symbol;Acc:MGI:107504]
ENSMUSG00000014353	5.8099	-3.20918	1.79078	-1.79206	0.073124	0.31628	Tmem87b	transmembrane protein 87B [Source:MGI Symbol;Acc:MGI:1919727]
ENSMUSG00000014355	40.8335	-0.576349	0.500576	-1.15137	0.24958	0.603523	Anapc1	anaphase promoting complex subunit 1 [Source:MGI Symbol;Acc:MGI:103097]
ENSMUSG00000014361	2.55409	-0.313329	3.57952	-0.0875337	0.930247	NA	Mertk	MER proto-oncogene tyrosine kinase [Source:MGI Symbol;Acc:MGI:96965]
ENSMUSG00000014402	3.78789	2.37422	2.04566	1.16061	0.2458	NA	Tsg101	tumor susceptibility gene 101 [Source:MGI Symbol;Acc:MGI:106581]
ENSMUSG00000014418	11.2418	0.413798	1.94118	0.213168	0.831196	0.94915	Hps5	HPS5, biogenesis of lysosomal organelles complex 2 subunit 2 [Source:MGI Symbol;Acc:MGI:2180307]
ENSMUSG00000014426	7.87804	-1.45544	2.22142	-0.655184	0.512349	0.821086	Map3k4	mitogen-activated protein kinase kinase kinase 4 [Source:MGI Symbol;Acc:MGI:1346875]
ENSMUSG00000014444	0.482805	1.78913	6.09182	0.293694	0.768991	NA	Piezo1	piezo-type mechanosensitive ion channel component 1 [Source:MGI Symbol;Acc:MGI:3603204]
ENSMUSG00000014453	16.8316	2.8992	1.89098	1.53318	0.125232	0.428545	Blk	B lymphoid kinase [Source:MGI Symbol;Acc:MGI:88169]
ENSMUSG00000014470	18.4927	1.69194	0.840671	2.0126	0.0441566	0.228642	Rnf166	ring finger protein 166 [Source:MGI Symbol;Acc:MGI:1915968]
ENSMUSG00000014496	52.8367	0.904437	1.6574	0.545695	0.585276	0.859283	Ankrd28	ankyrin repeat domain 28 [Source:MGI Symbol;Acc:MGI:2145661]
ENSMUSG00000014498	8.11836	-0.836796	1.81275	-0.461617	0.644356	0.882289	Ankrd52	ankyrin repeat domain 52 [Source:MGI Symbol;Acc:MGI:2444029]
ENSMUSG00000014503	352.724	-1.9911	0.295063	-6.74805	1.5e-11	8.44e-10	Pkd2l2	polycystic kidney disease 2-like 2 [Source:MGI Symbol;Acc:MGI:1858231]
ENSMUSG00000014504	13.3526	-1.69981	2.16537	-0.784998	0.432455	0.770948	Srp19	signal recognition particle 19 [Source:MGI Symbol;Acc:MGI:1913634]
ENSMUSG00000014529	61.5928	-1.52346	1.63642	-0.930974	0.351867	0.705002	Tmbim7	transmembrane BAX inhibitor motif containing 7 [Source:MGI Symbol;Acc:MGI:1922305]
ENSMUSG00000014542	0	NA	NA	NA	NA	NA	Clec4f	C-type lectin domain family 4, member f [Source:MGI Symbol;Acc:MGI:1859834]
ENSMUSG00000014543	0	NA	NA	NA	NA	NA	Klra17	killer cell lectin-like receptor, subfamily A, member 17 [Source:MGI Symbol;Acc:MGI:2180674]
ENSMUSG00000014547	6.98574	4.24635	1.87054	2.27011	0.0232008	0.147026	Wdfy2	WD repeat and FYVE domain containing 2 [Source:MGI Symbol;Acc:MGI:2442811]
ENSMUSG00000014550	9.04276	0.408327	1.11627	0.365796	0.714517	0.910493	Rbsn	rabenosyn, RAB effector [Source:MGI Symbol;Acc:MGI:1925537]
ENSMUSG00000014551	7.5112	0.601362	2.10184	0.286113	0.774792	0.93147	Mrps25	mitochondrial ribosomal protein S25 [Source:MGI Symbol;Acc:MGI:1928140]
ENSMUSG00000014554	1.73991	-0.598205	5.35236	-0.111765	0.91101	NA	Dguok	deoxyguanosine kinase [Source:MGI Symbol;Acc:MGI:1351602]
ENSMUSG00000014592	6.45404	0.836286	2.19319	0.381311	0.702973	0.906397	Camta1	calmodulin binding transcription activator 1 [Source:MGI Symbol;Acc:MGI:2140230]
ENSMUSG00000014599	0.296947	-2.19091	6.13573	-0.357075	0.721036	NA	Csf1	colony stimulating factor 1 (macrophage) [Source:MGI Symbol;Acc:MGI:1339753]
ENSMUSG00000014601	5.66916	-2.94594	2.83232	-1.04012	0.298285	0.65649	Strip1	striatin interacting protein 1 [Source:MGI Symbol;Acc:MGI:2443884]
ENSMUSG00000014602	36.1723	1.77536	1.76193	1.00762	0.313637	0.672372	Kif1a	kinesin family member 1A [Source:MGI Symbol;Acc:MGI:108391]
ENSMUSG00000014603	0	NA	NA	NA	NA	NA	Alx3	aristaless-like homeobox 3 [Source:MGI Symbol;Acc:MGI:1277097]
ENSMUSG00000014606	4.04245	-0.8904	2.35369	-0.378299	0.705208	NA	Slc25a11	solute carrier family 25 (mitochondrial carrier oxoglutarate carrier), member 11 [Source:MGI Symbol;Acc:MGI:1915113]
ENSMUSG00000014609	30.5036	2.12305	1.46214	1.45201	0.146499	0.464193	Chrne	cholinergic receptor, nicotinic, epsilon polypeptide [Source:MGI Symbol;Acc:MGI:87894]
ENSMUSG00000014633	7.66704	0.223524	3.26688	0.0684214	0.94545	0.98247	Cmc2	C-X9-C motif containing 2 [Source:MGI Symbol;Acc:MGI:1913781]
ENSMUSG00000014668	10.9818	0.539271	2.24175	0.240559	0.809897	0.941851	Chfr	checkpoint with forkhead and ring finger domains [Source:MGI Symbol;Acc:MGI:2444898]
ENSMUSG00000014686	1.56085	2.31055	3.481	0.663761	0.506843	NA	Ceacam16	CEA cell adhesion molecule 16 [Source:MGI Symbol;Acc:MGI:2685615]
ENSMUSG00000014704	0.157524	1.25103	6.23278	0.200718	0.840919	NA	Hoxa2	homeobox A2 [Source:MGI Symbol;Acc:MGI:96174]
ENSMUSG00000014725	0	NA	NA	NA	NA	NA	Adam28	a disintegrin and metallopeptidase domain 28 [Source:MGI Symbol;Acc:MGI:105988]
ENSMUSG00000014747	40.5995	4.21975	0.734002	5.74897	8.98e-09	3.52e-07	Ankrd53	ankyrin repeat domain 53 [Source:MGI Symbol;Acc:MGI:1922555]
ENSMUSG00000014748	43.9105	1.34298	0.620497	2.16437	0.0304363	0.176571	Tex261	testis expressed gene 261 [Source:MGI Symbol;Acc:MGI:1096575]
ENSMUSG00000014763	25.1024	0.321031	1.78439	0.17991	0.857223	0.958193	Fam120b	family with sequence similarity 120, member B [Source:MGI Symbol;Acc:MGI:1914794]
ENSMUSG00000014767	26.7681	-0.085046	1.77544	-0.0479014	0.961795	0.986083	Tbp	TATA box binding protein [Source:MGI Symbol;Acc:MGI:101838]
ENSMUSG00000014769	52.7427	-1.33377	1.72336	-0.77394	0.438966	0.776312	Psmb1	proteasome (prosome, macropain) subunit, beta type 1 [Source:MGI Symbol;Acc:MGI:104884]
ENSMUSG00000014771	1.19894	-2.82427	5.5683	-0.507204	0.612011	NA	Pdcd2	programmed cell death 2 [Source:MGI Symbol;Acc:MGI:104643]
ENSMUSG00000014773	14.8481	3.28807	1.89692	1.73338	0.0830289	0.339133	Dll1	delta like canonical Notch ligand 1 [Source:MGI Symbol;Acc:MGI:104659]
ENSMUSG00000014776	71.5763	-0.485773	2.7159	-0.178863	0.858045	0.958283	Nol3	nucleolar protein 3 (apoptosis repressor with CARD domain) [Source:MGI Symbol;Acc:MGI:1925938]
ENSMUSG00000014778	18.295	-2.56104	1.71176	-1.49614	0.134616	0.443005	Fhod1	formin homology 2 domain containing 1 [Source:MGI Symbol;Acc:MGI:2679008]
ENSMUSG00000014782	14.9899	0.18253	1.12104	0.162823	0.870658	0.962229	Plekhg4	pleckstrin homology domain containing, family G (with RhoGef domain) member 4 [Source:MGI Symbol;Acc:MGI:2142544]
ENSMUSG00000014786	46.1493	1.94909	0.575924	3.38429	0.000713632	0.00975057	Slc9a5	solute carrier family 9 (sodium/hydrogen exchanger), member 5 [Source:MGI Symbol;Acc:MGI:2685542]
ENSMUSG00000014791	66.0425	3.56566	0.525579	6.78425	1.17e-11	6.69e-10	Elmo3	engulfment and cell motility 3 [Source:MGI Symbol;Acc:MGI:2679007]
ENSMUSG00000014813	209.131	3.45014	1.68895	2.04277	0.0410747	0.218181	Stc1	stanniocalcin 1 [Source:MGI Symbol;Acc:MGI:109131]
ENSMUSG00000014837	22.2987	1.77069	0.830084	2.13314	0.032913	0.186678	Matcap1	microtubule associated tyrosine carboxypeptidase 1 [Source:MGI Symbol;Acc:MGI:1921606]
ENSMUSG00000014846	10.761	0.783489	1.703	0.460064	0.64547	0.882289	Tppp3	tubulin polymerization-promoting protein family member 3 [Source:MGI Symbol;Acc:MGI:1915221]
ENSMUSG00000014850	15.5516	-0.949908	1.94177	-0.489196	0.624703	0.875825	Msh3	mutS homolog 3 [Source:MGI Symbol;Acc:MGI:109519]
ENSMUSG00000014852	0	NA	NA	NA	NA	NA	Adamts13	ADAM metallopeptidase with thrombospondin type 1 motif 13 [Source:MGI Symbol;Acc:MGI:2685556]
ENSMUSG00000014856	3.09397	-1.23258	2.79425	-0.441113	0.659131	NA	Tmem208	transmembrane protein 208 [Source:MGI Symbol;Acc:MGI:1913570]
ENSMUSG00000014859	30.9095	2.49369	0.811898	3.07144	0.00213031	0.0240359	E2f4	E2F transcription factor 4 [Source:MGI Symbol;Acc:MGI:103012]
ENSMUSG00000014867	145.932	-0.778899	0.281944	-2.7626	0.00573422	0.0522036	Surf4	surfeit gene 4 [Source:MGI Symbol;Acc:MGI:98445]
ENSMUSG00000014873	4.15743	-0.162119	1.96665	-0.0824341	0.934302	NA	Surf2	surfeit gene 2 [Source:MGI Symbol;Acc:MGI:98444]
ENSMUSG00000014905	50.9463	-0.10903	0.485536	-0.224557	0.822324	0.946082	Dnajb9	DnaJ heat shock protein family (Hsp40) member B9 [Source:MGI Symbol;Acc:MGI:1351618]
ENSMUSG00000014907	22.2876	-0.367516	0.646568	-0.568411	0.569756	0.852697	Naf1	nuclear assembly factor 1 ribonucleoprotein [Source:MGI Symbol;Acc:MGI:2682306]
ENSMUSG00000014932	7.30235	-2.03542	1.86279	-1.09267	0.274537	0.631301	Yes1	YES proto-oncogene 1, Src family tyrosine kinase [Source:MGI Symbol;Acc:MGI:99147]
ENSMUSG00000014956	24.5289	0.527664	0.707084	0.746253	0.455515	0.786628	Ppp1cb	protein phosphatase 1 catalytic subunit beta [Source:MGI Symbol;Acc:MGI:104871]
ENSMUSG00000014959	68.771	-0.11679	1.70532	-0.0684856	0.945399	0.98247	Gorasp2	golgi reassembly stacking protein 2 [Source:MGI Symbol;Acc:MGI:2135962]
ENSMUSG00000014980	0.283783	-2.22338	6.13514	-0.362401	0.717052	NA	Tsen15	tRNA splicing endonuclease subunit 15 [Source:MGI Symbol;Acc:MGI:1913887]
ENSMUSG00000015001	0	NA	NA	NA	NA	NA	Oc90	otoconin 90 [Source:MGI Symbol;Acc:MGI:1313269]
ENSMUSG00000015002	44.773	0.633946	0.4907	1.29192	0.196385	0.53781	Efr3a	EFR3 homolog A [Source:MGI Symbol;Acc:MGI:1923990]
ENSMUSG00000015013	17.1958	-1.86905	0.912875	-2.04743	0.0406155	0.216417	Trappc2l	trafficking protein particle complex 2L [Source:MGI Symbol;Acc:MGI:1916295]
ENSMUSG00000015016	11.1543	1.71146	2.10757	0.812052	0.416762	0.760124	Acsf3	acyl-CoA synthetase family member 3 [Source:MGI Symbol;Acc:MGI:2182591]
ENSMUSG00000015023	10.6167	1.84814	1.44299	1.28077	0.200276	0.543575	Ddx19a	DEAD box helicase 19a [Source:MGI Symbol;Acc:MGI:99526]
ENSMUSG00000015027	12.4954	-1.51732	1.49056	-1.01795	0.3087	0.667198	Galns	galactosamine (N-acetyl)-6-sulfatase [Source:MGI Symbol;Acc:MGI:1355303]
ENSMUSG00000015053	1.11083	11.3927	6.11061	1.86442	0.0622633	NA	Gata2	GATA binding protein 2 [Source:MGI Symbol;Acc:MGI:95662]
ENSMUSG00000015083	59.7138	2.24313	0.47605	4.71196	2.45e-06	6.29e-05	C8g	complement component 8, gamma polypeptide [Source:MGI Symbol;Acc:MGI:88237]
ENSMUSG00000015085	0.919121	-3.98867	6.12476	-0.651238	0.514893	NA	Entpd2	ectonucleoside triphosphate diphosphohydrolase 2 [Source:MGI Symbol;Acc:MGI:1096863]
ENSMUSG00000015087	48.5178	1.73849	0.629157	2.76321	0.00572359	0.0521857	Rabl6	RAB, member RAS oncogene family-like 6 [Source:MGI Symbol;Acc:MGI:2442633]
ENSMUSG00000015090	12.5431	3.99823	1.95292	2.0473	0.0406283	0.216417	Ptgds	prostaglandin D2 synthase (brain) [Source:MGI Symbol;Acc:MGI:99261]
ENSMUSG00000015092	48.3357	0.533848	1.7269	0.309137	0.757217	0.926549	Edf1	endothelial differentiation-related factor 1 [Source:MGI Symbol;Acc:MGI:1891227]
ENSMUSG00000015093	0	NA	NA	NA	NA	NA	Clic3	chloride intracellular channel 3 [Source:MGI Symbol;Acc:MGI:1916704]
ENSMUSG00000015094	0.670323	0.304433	6.09454	0.0499518	0.960161	NA	Npdc1	neural proliferation, differentiation and control 1 [Source:MGI Symbol;Acc:MGI:1099802]
ENSMUSG00000015095	115.287	0.275531	0.515989	0.533986	0.593351	0.86204	Fbxw5	F-box and WD-40 domain protein 5 [Source:MGI Symbol;Acc:MGI:1354731]
ENSMUSG00000015112	2.5919	7.65202	5.63247	1.35855	0.174288	NA	Slc25a13	solute carrier family 25 (mitochondrial carrier, adenine nucleotide translocator), member 13 [Source:MGI Symbol;Acc:MGI:1354721]
ENSMUSG00000015120	0.524919	-3.51199	6.13058	-0.572864	0.566737	NA	Ube2i	ubiquitin-conjugating enzyme E2I [Source:MGI Symbol;Acc:MGI:107365]
ENSMUSG00000015126	12.8523	0.716789	1.17813	0.608413	0.542914	0.840334	Tsr3	TSR3 20S rRNA accumulation [Source:MGI Symbol;Acc:MGI:1915577]
ENSMUSG00000015127	3.99474	1.49396	2.41292	0.619152	0.535816	NA	Unkl	unkempt family like zinc finger [Source:MGI Symbol;Acc:MGI:1921404]
ENSMUSG00000015133	1.94633	3.68131	2.91265	1.2639	0.206264	NA	Lrrk1	leucine-rich repeat kinase 1 [Source:MGI Symbol;Acc:MGI:2142227]
ENSMUSG00000015134	0.905443	-3.64827	4.59343	-0.794237	0.427057	NA	Aldh1a3	aldehyde dehydrogenase family 1, subfamily A3 [Source:MGI Symbol;Acc:MGI:1861722]
ENSMUSG00000015143	3.39946	1.72973	2.39197	0.723139	0.469595	NA	Actn1	actinin, alpha 1 [Source:MGI Symbol;Acc:MGI:2137706]
ENSMUSG00000015149	127.892	1.80208	1.69454	1.06347	0.287571	0.644309	Sirt2	sirtuin 2 [Source:MGI Symbol;Acc:MGI:1927664]
ENSMUSG00000015165	64.6847	0.800187	1.73534	0.461112	0.644718	0.882289	Hnrnpl	heterogeneous nuclear ribonucleoprotein L [Source:MGI Symbol;Acc:MGI:104816]
ENSMUSG00000015176	47.5459	-3.04012	1.63292	-1.86177	0.0626355	0.287661	Nolc1	nucleolar and coiled-body phosphoprotein 1 [Source:MGI Symbol;Acc:MGI:1918019]
ENSMUSG00000015189	12.1704	2.64109	0.975603	2.70714	0.00678657	0.0595241	Casd1	CAS1 domain containing 1 [Source:MGI Symbol;Acc:MGI:2384865]
ENSMUSG00000015202	4.96671	3.57458	2.50326	1.42797	0.153301	0.477242	Cnksr3	Cnksr family member 3 [Source:MGI Symbol;Acc:MGI:2674130]
ENSMUSG00000015214	3.67056	0.0389787	3.29877	0.0118161	0.990572	NA	Mtmr1	myotubularin related protein 1 [Source:MGI Symbol;Acc:MGI:1858271]
ENSMUSG00000015217	0.301384	-1.41766	6.1492	-0.230544	0.817669	NA	Hmgb3	high mobility group box 3 [Source:MGI Symbol;Acc:MGI:1098219]
ENSMUSG00000015222	86.6268	1.74916	1.70276	1.02725	0.304301	0.663554	Map2	microtubule-associated protein 2 [Source:MGI Symbol;Acc:MGI:97175]
ENSMUSG00000015224	1.07708	1.69195	6.14346	0.275407	0.783003	NA	Cyp2j9	cytochrome P450, family 2, subfamily j, polypeptide 9 [Source:MGI Symbol;Acc:MGI:1921769]
ENSMUSG00000015242	69.0623	-2.39166	1.75119	-1.36574	0.172022	0.506908	Nipsnap3a	nipsnap homolog 3A [Source:MGI Symbol;Acc:MGI:1920648]
ENSMUSG00000015243	45.3191	0.617686	0.578376	1.06797	0.285536	0.64278	Abca1	ATP-binding cassette, sub-family A member 1 [Source:MGI Symbol;Acc:MGI:99607]
ENSMUSG00000015247	1.53585	2.81684	4.51027	0.62454	0.532273	NA	Nipsnap3b	nipsnap homolog 3B [Source:MGI Symbol;Acc:MGI:1913786]
ENSMUSG00000015289	0.307192	-1.71836	6.14188	-0.279778	0.779648	NA	Lage3	L antigen family, member 3 [Source:MGI Symbol;Acc:MGI:1913442]
ENSMUSG00000015290	8.09886	0.0812998	2.09977	0.0387184	0.969115	0.988711	Ubl4a	ubiquitin-like 4A [Source:MGI Symbol;Acc:MGI:95049]
ENSMUSG00000015291	2.60061	-1.50162	3.71164	-0.404571	0.685793	NA	Gdi1	GDP dissociation inhibitor 1 [Source:MGI Symbol;Acc:MGI:99846]
ENSMUSG00000015305	26.7461	1.57692	1.45349	1.08491	0.27796	0.635445	Sash1	SAM and SH3 domain containing 1 [Source:MGI Symbol;Acc:MGI:1917347]
ENSMUSG00000015312	3.70949	-0.0858474	2.29123	-0.0374678	0.970112	NA	Gadd45b	growth arrest and DNA-damage-inducible 45 beta [Source:MGI Symbol;Acc:MGI:107776]
ENSMUSG00000015314	0	NA	NA	NA	NA	NA	Slamf6	SLAM family member 6 [Source:MGI Symbol;Acc:MGI:1353620]
ENSMUSG00000015316	1.28347	1.59573	4.49935	0.354658	0.722846	NA	Slamf1	signaling lymphocytic activation molecule family member 1 [Source:MGI Symbol;Acc:MGI:1351314]
ENSMUSG00000015335	12.5961	-0.0442946	1.95104	-0.0227031	0.981887	0.994477	Zdhhc12	zinc finger, DHHC domain containing 12 [Source:MGI Symbol;Acc:MGI:1913470]
ENSMUSG00000015337	756.81	2.52723	1.6731	1.51051	0.130914	0.437463	Endog	endonuclease G [Source:MGI Symbol;Acc:MGI:1261433]
ENSMUSG00000015340	1.4201	-6.8544	3.26047	-2.10227	0.0355294	NA	Cybb	cytochrome b-245, beta polypeptide [Source:MGI Symbol;Acc:MGI:88574]
ENSMUSG00000015341	1.22719	-17.2836	6.05537	-2.85427	0.00431364	NA	Golga7	golgin A7 [Source:MGI Symbol;Acc:MGI:1931029]
ENSMUSG00000015342	20.8017	0.0873992	0.723507	0.120799	0.90385	0.969033	Xk	X-linked Kx blood group [Source:MGI Symbol;Acc:MGI:103569]
ENSMUSG00000015354	3.78006	-1.75253	2.54723	-0.688017	0.491442	NA	Pcolce2	procollagen C-endopeptidase enhancer 2 [Source:MGI Symbol;Acc:MGI:1923727]
ENSMUSG00000015355	0.0877691	-0.0247755	6.18839	-0.00400355	0.996806	NA	Cd48	CD48 antigen [Source:MGI Symbol;Acc:MGI:88339]
ENSMUSG00000015357	101.227	1.25982	1.70905	0.737149	0.461031	0.790082	Clpx	caseinolytic mitochondrial matrix peptidase chaperone subunit [Source:MGI Symbol;Acc:MGI:1346017]
ENSMUSG00000015363	14.4227	-0.4259	1.77108	-0.240475	0.809962	0.941851	Trabd	TraB domain containing [Source:MGI Symbol;Acc:MGI:1915226]
ENSMUSG00000015365	52.259	-0.69281	1.76553	-0.392409	0.694756	0.903643	Mov10l1	Mov10 like RISC complex RNA helicase 1 [Source:MGI Symbol;Acc:MGI:1891384]
ENSMUSG00000015377	33.8404	1.77941	1.76244	1.00963	0.312673	0.671738	Dennd6b	DENN domain containing 6B [Source:MGI Symbol;Acc:MGI:1916690]
ENSMUSG00000015396	0.157524	1.25103	6.23278	0.200718	0.840919	NA	Cd83	CD83 antigen [Source:MGI Symbol;Acc:MGI:1328316]
ENSMUSG00000015401	0	NA	NA	NA	NA	NA	Cltrn	collectrin, amino acid transport regulator [Source:MGI Symbol;Acc:MGI:1926234]
ENSMUSG00000015405	0	NA	NA	NA	NA	NA	Ace2	angiotensin converting enzyme 2 [Source:MGI Symbol;Acc:MGI:1917258]
ENSMUSG00000015437	3.73584	3.76601	2.76726	1.36092	0.173541	NA	Gzmb	granzyme B [Source:MGI Symbol;Acc:MGI:109267]
ENSMUSG00000015441	7.50611	3.69065	2.32503	1.58736	0.112432	0.40466	Gzmf	granzyme F [Source:MGI Symbol;Acc:MGI:109254]
ENSMUSG00000015443	26.8385	2.54023	1.773	1.43273	0.151935	0.475199	Gzmn	granzyme N [Source:MGI Symbol;Acc:MGI:2675494]
ENSMUSG00000015451	1.1671	-4.44448	6.12359	-0.725797	0.467963	NA	C4a	complement C4A (Rodgers blood group) [Source:MGI Symbol;Acc:MGI:98320]
ENSMUSG00000015452	0	NA	NA	NA	NA	NA	Ager	advanced glycosylation end product-specific receptor [Source:MGI Symbol;Acc:MGI:893592]
ENSMUSG00000015461	14.5809	0.970762	1.19386	0.813132	0.416142	0.759874	Atf6b	activating transcription factor 6 beta [Source:MGI Symbol;Acc:MGI:105121]
ENSMUSG00000015467	0	NA	NA	NA	NA	NA	Egfl8	EGF-like domain 8 [Source:MGI Symbol;Acc:MGI:1932094]
ENSMUSG00000015468	3.61625	-1.14422	2.36279	-0.484266	0.628197	NA	Notch4	notch 4 [Source:MGI Symbol;Acc:MGI:107471]
ENSMUSG00000015474	0.256895	-1.87095	6.14041	-0.304695	0.760598	NA	Ppt2	palmitoyl-protein thioesterase 2 [Source:MGI Symbol;Acc:MGI:1860075]
ENSMUSG00000015476	1.48453	7.79897	5.10672	1.5272	0.126712	NA	Prrt1	proline-rich transmembrane protein 1 [Source:MGI Symbol;Acc:MGI:1932118]
ENSMUSG00000015478	5.05542	-0.448716	2.30345	-0.194802	0.845548	0.953669	Rnf5	ring finger protein 5 [Source:MGI Symbol;Acc:MGI:1860076]
ENSMUSG00000015484	1.10683	1.71652	4.44006	0.386598	0.699054	NA	Fam163a	family with sequence similarity 163, member A [Source:MGI Symbol;Acc:MGI:3618859]
ENSMUSG00000015488	1.79789	7.45282	6.08471	1.22484	0.220634	NA	Cacfd1	calcium channel flower domain containing 1 [Source:MGI Symbol;Acc:MGI:1924317]
ENSMUSG00000015501	1.23099	3.19048	6.06892	0.525708	0.599091	NA	Hivep2	human immunodeficiency virus type I enhancer binding protein 2 [Source:MGI Symbol;Acc:MGI:1338076]
ENSMUSG00000015519	0	NA	NA	NA	NA	NA	2310057J18Rik	RIKEN cDNA 2310057J18 gene [Source:MGI Symbol;Acc:MGI:1914969]
ENSMUSG00000015522	7.62527	-0.8823	2.11598	-0.41697	0.676701	0.896226	Arnt	aryl hydrocarbon receptor nuclear translocator [Source:MGI Symbol;Acc:MGI:88071]
ENSMUSG00000015533	9.92301	3.07464	1.59014	1.93356	0.0531666	0.258852	Itga2	integrin alpha 2 [Source:MGI Symbol;Acc:MGI:96600]
ENSMUSG00000015536	2.52754	-0.0284072	2.60035	-0.0109244	0.991284	NA	Mocs2	molybdenum cofactor synthesis 2 [Source:MGI Symbol;Acc:MGI:1336894]
ENSMUSG00000015542	63.7166	1.1431	1.71867	0.665109	0.505981	0.816862	Nat9	N-acetyltransferase 9 (GCN5-related, putative) [Source:MGI Symbol;Acc:MGI:1913426]
ENSMUSG00000015568	0.598712	4.17035	6.18047	0.674763	0.499826	NA	Lpl	lipoprotein lipase [Source:MGI Symbol;Acc:MGI:96820]
ENSMUSG00000015575	7.69225	0.0510439	2.00137	0.0255044	0.979653	0.993523	Atp6v0e	ATPase, H+ transporting, lysosomal V0 subunit E [Source:MGI Symbol;Acc:MGI:1328318]
ENSMUSG00000015579	0	NA	NA	NA	NA	NA	Nkx2-5	NK2 homeobox 5 [Source:MGI Symbol;Acc:MGI:97350]
ENSMUSG00000015597	133.466	0.395797	0.326059	1.21388	0.224793	0.572929	Zfp318	zinc finger protein 318 [Source:MGI Symbol;Acc:MGI:1889348]
ENSMUSG00000015599	736.752	3.69089	0.350621	10.5267	6.51e-26	1.06e-23	Ttbk1	tau tubulin kinase 1 [Source:MGI Symbol;Acc:MGI:2147036]
ENSMUSG00000015605	54.0764	1.58538	1.12252	1.41234	0.15785	0.485198	Srf	serum response factor [Source:MGI Symbol;Acc:MGI:106658]
ENSMUSG00000015619	1.91951	5.68551	3.04839	1.86509	0.0621694	NA	Gata3	GATA binding protein 3 [Source:MGI Symbol;Acc:MGI:95663]
ENSMUSG00000015627	0.353001	3.71162	6.21948	0.596774	0.550658	NA	Gata5	GATA binding protein 5 [Source:MGI Symbol;Acc:MGI:109497]
ENSMUSG00000015647	37.6826	0.152362	0.692761	0.219934	0.825923	0.947673	Lama5	laminin, alpha 5 [Source:MGI Symbol;Acc:MGI:105382]
ENSMUSG00000015652	0.797768	-2.66669	6.126	-0.435307	0.66334	NA	Steap1	six transmembrane epithelial antigen of the prostate 1 [Source:MGI Symbol;Acc:MGI:1917608]
ENSMUSG00000015653	1.00361	-2.49665	5.65985	-0.441116	0.659129	NA	Steap2	six transmembrane epithelial antigen of prostate 2 [Source:MGI Symbol;Acc:MGI:1921301]
ENSMUSG00000015656	4.87959	-4.01745	2.7964	-1.43665	0.150817	0.472805	Hspa8	heat shock protein 8 [Source:MGI Symbol;Acc:MGI:105384]
ENSMUSG00000015659	5.25171	-0.0353578	2.65292	-0.0133279	0.989366	0.997216	Serac1	serine active site containing 1 [Source:MGI Symbol;Acc:MGI:2447813]
ENSMUSG00000015665	0.164991	3.17449	6.23278	0.509322	0.610526	NA	Awat1	acyl-CoA wax alcohol acyltransferase 1 [Source:MGI Symbol;Acc:MGI:3588200]
ENSMUSG00000015668	12.0327	6.19666	1.37948	4.49201	7.06e-06	0.0001635	Pdzd11	PDZ domain containing 11 [Source:MGI Symbol;Acc:MGI:1919871]
ENSMUSG00000015671	15.7072	-2.22024	1.66957	-1.32983	0.183576	0.523116	Psma2	proteasome subunit alpha 2 [Source:MGI Symbol;Acc:MGI:104885]
ENSMUSG00000015672	6.02312	-0.706068	3.12917	-0.225641	0.821481	0.946082	Mrpl32	mitochondrial ribosomal protein L32 [Source:MGI Symbol;Acc:MGI:2137226]
ENSMUSG00000015697	48.7164	-0.954692	1.79198	-0.532759	0.5942	0.86204	Setdb1	SET domain, bifurcated 1 [Source:MGI Symbol;Acc:MGI:1934229]
ENSMUSG00000015702	0.552395	4.63546	6.18493	0.749476	0.45357	NA	Anxa9	annexin A9 [Source:MGI Symbol;Acc:MGI:1923711]
ENSMUSG00000015709	1.47697	0.170802	3.83541	0.0445328	0.96448	NA	Arnt2	aryl hydrocarbon receptor nuclear translocator 2 [Source:MGI Symbol;Acc:MGI:107188]
ENSMUSG00000015711	28.2299	0.0456181	0.817131	0.0558271	0.95548	0.984382	Prune1	prune exopolyphosphatase [Source:MGI Symbol;Acc:MGI:1925152]
ENSMUSG00000015714	34.1769	1.41684	0.932228	1.51985	0.12855	0.434084	Cers2	ceramide synthase 2 [Source:MGI Symbol;Acc:MGI:1924143]
ENSMUSG00000015721	0.184132	3.63859	6.21697	0.585268	0.558368	NA	Nlrp5	NLR family, pyrin domain containing 5 [Source:MGI Symbol;Acc:MGI:1345193]
ENSMUSG00000015733	9.0834	-2.68467	1.92198	-1.39682	0.162466	0.489655	Capza2	capping actin protein of muscle Z-line subunit alpha 2 [Source:MGI Symbol;Acc:MGI:106222]
ENSMUSG00000015745	39.5013	5.34009	1.68261	3.1737	0.0015051	0.0180822	Plekho1	pleckstrin homology domain containing, family O member 1 [Source:MGI Symbol;Acc:MGI:1914470]
ENSMUSG00000015747	14.6124	-1.54981	1.54445	-1.00347	0.315633	0.673385	Vps45	vacuolar protein sorting 45 [Source:MGI Symbol;Acc:MGI:891965]
ENSMUSG00000015748	12.9792	-2.46899	1.85835	-1.32859	0.183983	0.523351	Prpf3	pre-mRNA processing factor 3 [Source:MGI Symbol;Acc:MGI:1918017]
ENSMUSG00000015749	6.98861	-1.38018	2.12236	-0.650306	0.515495	0.824115	Anp32e	acidic nuclear phosphoprotein 32 family member E [Source:MGI Symbol;Acc:MGI:1913721]
ENSMUSG00000015750	0.95253	3.53803	6.1338	0.576809	0.564068	NA	Aph1a	aph1 homolog A, gamma secretase subunit [Source:MGI Symbol;Acc:MGI:2385110]
ENSMUSG00000015755	2.74587	2.13535	2.98318	0.715796	0.474118	NA	Tab2	TGF-beta activated kinase 1/MAP3K7 binding protein 2 [Source:MGI Symbol;Acc:MGI:1915902]
ENSMUSG00000015757	27.9493	-0.87153	0.788679	-1.10505	0.269138	0.626002	Ppil4	peptidylprolyl isomerase (cyclophilin)-like 4 [Source:MGI Symbol;Acc:MGI:1914668]
ENSMUSG00000015759	5.20241	0.384504	1.99543	0.192692	0.8472	0.954731	Cnih1	cornichon family AMPA receptor auxiliary protein 1 [Source:MGI Symbol;Acc:MGI:1277202]
ENSMUSG00000015766	2.92555	1.4715	2.62903	0.559713	0.575675	NA	Eps8	epidermal growth factor receptor pathway substrate 8 [Source:MGI Symbol;Acc:MGI:104684]
ENSMUSG00000015776	8.32209	1.23591	2.0626	0.599201	0.549039	0.842491	Med22	mediator complex subunit 22 [Source:MGI Symbol;Acc:MGI:98446]
ENSMUSG00000015787	0.339585	-2.65223	6.13131	-0.432571	0.665326	NA	Abo	ABO, alpha 1-3-N-acetylgalactosaminyltransferase and alpha 1-3-galactosyltransferase [Source:MGI Symbol;Acc:MGI:2135738]
ENSMUSG00000015790	4.54641	-0.0662012	2.30531	-0.0287168	0.97709	NA	Surf1	surfeit gene 1 [Source:MGI Symbol;Acc:MGI:98443]
ENSMUSG00000015804	200.68	-2.20075	1.68882	-1.30313	0.192531	0.535027	Med28	mediator complex subunit 28 [Source:MGI Symbol;Acc:MGI:1914249]
ENSMUSG00000015806	7.39432	0.903355	1.93495	0.466861	0.640599	0.879847	Qdpr	quinoid dihydropteridine reductase [Source:MGI Symbol;Acc:MGI:97836]
ENSMUSG00000015812	0	NA	NA	NA	NA	NA	Gnrh1	gonadotropin releasing hormone 1 [Source:MGI Symbol;Acc:MGI:95789]
ENSMUSG00000015829	0	NA	NA	NA	NA	NA	Tnr	tenascin R [Source:MGI Symbol;Acc:MGI:99516]
ENSMUSG00000015837	103.391	-0.247977	0.31252	-0.793476	0.427501	0.767099	Sqstm1	sequestosome 1 [Source:MGI Symbol;Acc:MGI:107931]
ENSMUSG00000015839	23.6827	0.389676	0.627805	0.620696	0.534799	0.835432	Nfe2l2	nuclear factor, erythroid derived 2, like 2 [Source:MGI Symbol;Acc:MGI:108420]
ENSMUSG00000015843	1.04321	11.5013	6.09148	1.8881	0.0590128	NA	Rxrg	retinoid X receptor gamma [Source:MGI Symbol;Acc:MGI:98216]
ENSMUSG00000015846	13.2607	1.11792	1.46083	0.765263	0.444115	0.780533	Rxra	retinoid X receptor alpha [Source:MGI Symbol;Acc:MGI:98214]
ENSMUSG00000015850	0.309599	7.03096	6.12725	1.14749	0.251179	NA	Adamtsl4	ADAMTS-like 4 [Source:MGI Symbol;Acc:MGI:2389008]
ENSMUSG00000015852	0.339193	-0.226574	6.14546	-0.0368686	0.97059	NA	Fcrl2	Fc receptor like 2 [Source:MGI Symbol;Acc:MGI:1933397]
ENSMUSG00000015854	14.3504	-3.81238	1.46093	-2.60956	0.00906601	0.0741515	Cd5l	CD5 antigen-like [Source:MGI Symbol;Acc:MGI:1334419]
ENSMUSG00000015869	13.6103	0.244358	1.8605	0.13134	0.895506	0.966922	Prpsap1	phosphoribosyl pyrophosphate synthetase-associated protein 1 [Source:MGI Symbol;Acc:MGI:1915013]
ENSMUSG00000015879	7.51262	6.3172	1.80811	3.49382	0.000476154	0.00687334	Fam184b	family with sequence similarity 184, member B [Source:MGI Symbol;Acc:MGI:2442958]
ENSMUSG00000015880	89.2013	-0.881588	0.415828	-2.12008	0.0339995	0.191462	Ncapg	non-SMC condensin I complex, subunit G [Source:MGI Symbol;Acc:MGI:1930197]
ENSMUSG00000015882	14.607	0.522577	1.98773	0.262901	0.792627	0.938067	Lcorl	ligand dependent nuclear receptor corepressor-like [Source:MGI Symbol;Acc:MGI:2651932]
ENSMUSG00000015889	10.3247	-2.78824	1.78906	-1.5585	0.119115	0.417996	Lta4h	leukotriene A4 hydrolase [Source:MGI Symbol;Acc:MGI:96836]
ENSMUSG00000015890	0.921755	4.53473	5.93383	0.764216	0.444739	NA	Amdhd1	amidohydrolase domain containing 1 [Source:MGI Symbol;Acc:MGI:1919011]
ENSMUSG00000015932	26.4716	0.683436	0.659479	1.03633	0.300049	0.658815	Dstn	destrin [Source:MGI Symbol;Acc:MGI:1929270]
ENSMUSG00000015937	10.7038	1.12482	1.90715	0.589788	0.555333	0.845148	Macroh2a1	macroH2A.1 histone [Source:MGI Symbol;Acc:MGI:1349392]
ENSMUSG00000015942	21.8378	-0.213677	0.82649	-0.258535	0.795994	0.938067	Gtf2ird2	GTF2I repeat domain containing 2 [Source:MGI Symbol;Acc:MGI:2149780]
ENSMUSG00000015943	9.56709	1.55132	2.05773	0.7539	0.450909	0.784136	Bola1	bolA family member 1 [Source:MGI Symbol;Acc:MGI:1916418]
ENSMUSG00000015944	6.36395	-4.37238	2.1386	-2.04451	0.0409033	0.217514	Castor2	cytosolic arginine sensor for mTORC1 subunit 2 [Source:MGI Symbol;Acc:MGI:1933384]
ENSMUSG00000015947	1.78543	0.263863	4.60844	0.0572564	0.954341	NA	Fcgr1	Fc receptor, IgG, high affinity I [Source:MGI Symbol;Acc:MGI:95498]
ENSMUSG00000015950	0.390008	-2.5334	6.13309	-0.413071	0.679555	NA	Ncf1	neutrophil cytosolic factor 1 [Source:MGI Symbol;Acc:MGI:97283]
ENSMUSG00000015957	0.983098	1.68746	6.16169	0.273863	0.78419	NA	Wnt11	wingless-type MMTV integration site family, member 11 [Source:MGI Symbol;Acc:MGI:101948]
ENSMUSG00000015961	43.982	1.08502	0.618468	1.75437	0.0793671	0.33239	Adss2	adenylosuccinate synthase 2 [Source:MGI Symbol;Acc:MGI:87948]
ENSMUSG00000015962	44.1834	0.0069222	0.696904	0.00993279	0.992075	0.997772	Spmip3	sperm microtubule inner protein 3 [Source:MGI Symbol;Acc:MGI:1916678]
ENSMUSG00000015966	0	NA	NA	NA	NA	NA	Il17rb	interleukin 17 receptor B [Source:MGI Symbol;Acc:MGI:1355292]
ENSMUSG00000015968	12.1743	2.00371	1.92177	1.04264	0.297116	0.655444	Cacna1d	calcium channel, voltage-dependent, L type, alpha 1D subunit [Source:MGI Symbol;Acc:MGI:88293]
ENSMUSG00000015970	51.9173	-0.213095	0.650116	-0.32778	0.743078	0.921681	Chdh	choline dehydrogenase [Source:MGI Symbol;Acc:MGI:1860776]
ENSMUSG00000015971	23.5209	-0.519414	1.80975	-0.287009	0.774105	0.93147	Actr8	ARP8 actin-related protein 8 [Source:MGI Symbol;Acc:MGI:1860775]
ENSMUSG00000015980	290.048	2.65053	1.80992	1.46445	0.143072	0.457286	Lrrc27	leucine rich repeat containing 27 [Source:MGI Symbol;Acc:MGI:1923862]
ENSMUSG00000015981	2.69487	4.0656	2.28136	1.78209	0.0747343	NA	Stk32c	serine/threonine kinase 32C [Source:MGI Symbol;Acc:MGI:2385336]
ENSMUSG00000015994	34.4443	-0.875736	0.691505	-1.26642	0.205363	0.549746	Fnta	farnesyltransferase, CAAX box, alpha [Source:MGI Symbol;Acc:MGI:104683]
ENSMUSG00000016018	718.956	-1.89218	0.17036	-11.107	1.16e-28	2.19e-26	Mtrex	Mtr4 exosome RNA helicase [Source:MGI Symbol;Acc:MGI:1919448]
ENSMUSG00000016024	0.909268	-0.575822	5.05802	-0.113843	0.909362	NA	Lbp	lipopolysaccharide binding protein [Source:MGI Symbol;Acc:MGI:1098776]
ENSMUSG00000016028	0.855404	4.56428	4.87802	0.935683	0.349436	NA	Celsr1	cadherin, EGF LAG seven-pass G-type receptor 1 [Source:MGI Symbol;Acc:MGI:1100883]
ENSMUSG00000016087	0.885024	1.71776	6.13693	0.279906	0.77955	NA	Fli1	Friend leukemia integration 1 [Source:MGI Symbol;Acc:MGI:95554]
ENSMUSG00000016128	5.65361	-1.81003	2.26928	-0.797623	0.425089	0.766004	Stard13	StAR related lipid transfer domain containing 13 [Source:MGI Symbol;Acc:MGI:2385331]
ENSMUSG00000016150	0	NA	NA	NA	NA	NA	Tenm1	teneurin transmembrane protein 1 [Source:MGI Symbol;Acc:MGI:1345185]
ENSMUSG00000016179	5.44969	1.24796	1.58766	0.786033	0.431848	0.770401	Camk1g	calcium/calmodulin-dependent protein kinase I gamma [Source:MGI Symbol;Acc:MGI:2388073]
ENSMUSG00000016181	3.97423	-2.41358	4.32784	-0.557687	0.577058	NA	Utp25	UTP25 small subunit processome component [Source:MGI Symbol;Acc:MGI:2138080]
ENSMUSG00000016194	0.685878	-2.31879	6.12771	-0.37841	0.705126	NA	Hsd11b1	hydroxysteroid 11-beta dehydrogenase 1 [Source:MGI Symbol;Acc:MGI:103562]
ENSMUSG00000016200	2.46997	1.10273	2.66274	0.414134	0.678776	NA	Syt14	synaptotagmin XIV [Source:MGI Symbol;Acc:MGI:2444490]
ENSMUSG00000016206	0.697583	-0.0898988	6.19162	-0.0145194	0.988416	NA	H2-M3	histocompatibility 2, M region locus 3 [Source:MGI Symbol;Acc:MGI:95915]
ENSMUSG00000016239	10.0915	0.278268	0.991669	0.280605	0.779013	0.932705	Lonrf3	LON peptidase N-terminal domain and ring finger 3 [Source:MGI Symbol;Acc:MGI:1921615]
ENSMUSG00000016252	111.284	1.09359	1.7049	0.641442	0.521236	0.827588	Atp5f1e	ATP synthase F1 subunit epsilon [Source:MGI Symbol;Acc:MGI:1855697]
ENSMUSG00000016253	13.0112	0.148247	1.90866	0.0776708	0.93809	0.979746	Nelfcd	negative elongation factor complex member C/D, Th1l [Source:MGI Symbol;Acc:MGI:1926424]
ENSMUSG00000016255	0.281254	2.23233	6.23105	0.358259	0.720149	NA	Tubb1	tubulin, beta 1 class VI [Source:MGI Symbol;Acc:MGI:107814]
ENSMUSG00000016256	9.11893	1.31907	1.71225	0.770371	0.44108	0.778352	Ctsz	cathepsin Z [Source:MGI Symbol;Acc:MGI:1891190]
ENSMUSG00000016257	4.67048	0.909083	2.06562	0.440103	0.659863	NA	Prelid3b	PRELI domain containing 3B [Source:MGI Symbol;Acc:MGI:1913640]
ENSMUSG00000016262	0.449559	-0.409495	6.12314	-0.0668767	0.94668	NA	Sertad4	SERTA domain containing 4 [Source:MGI Symbol;Acc:MGI:2443496]
ENSMUSG00000016283	0.241107	-1.11591	6.15572	-0.181281	0.856147	NA	H2-M2	histocompatibility 2, M region locus 2 [Source:MGI Symbol;Acc:MGI:95914]
ENSMUSG00000016308	3.81628	-3.94318	3.11787	-1.26471	0.205977	NA	Ube2a	ubiquitin-conjugating enzyme E2A [Source:MGI Symbol;Acc:MGI:102959]
ENSMUSG00000016319	0.946195	6.15628	6.14094	1.0025	0.316103	NA	Slc25a5	solute carrier family 25 (mitochondrial carrier, adenine nucleotide translocator), member 5 [Source:MGI Symbol;Acc:MGI:1353496]
ENSMUSG00000016327	0	NA	NA	NA	NA	NA	Atp1b4	ATPase Na+/K+ transporting, beta 4 polypeptide [Source:MGI Symbol;Acc:MGI:1915071]
ENSMUSG00000016344	0	NA	NA	NA	NA	NA	Ppdpf	pancreatic progenitor cell differentiation and proliferation factor [Source:MGI Symbol;Acc:MGI:1913746]
ENSMUSG00000016346	5.59368	0.750116	2.21019	0.33939	0.734316	0.919459	Kcnq2	potassium voltage-gated channel, subfamily Q, member 2 [Source:MGI Symbol;Acc:MGI:1309503]
ENSMUSG00000016349	2.61849	5.15927	3.00713	1.71568	0.0862207	NA	Eef1a2	eukaryotic translation elongation factor 1 alpha 2 [Source:MGI Symbol;Acc:MGI:1096317]
ENSMUSG00000016356	60.1521	3.31491	1.7124	1.93583	0.052889	0.258432	Col20a1	collagen, type XX, alpha 1 [Source:MGI Symbol;Acc:MGI:1920618]
ENSMUSG00000016382	3.95565	0.175424	2.52949	0.0693516	0.94471	NA	Pls3	plastin 3 (T-isoform) [Source:MGI Symbol;Acc:MGI:104807]
ENSMUSG00000016386	0.263307	-1.50507	6.14525	-0.244917	0.806521	NA	Mpped2	metallophosphoesterase domain containing 2 [Source:MGI Symbol;Acc:MGI:1924265]
ENSMUSG00000016409	14.2375	0.86295	1.15262	0.748686	0.454047	0.785445	Nkap	NFKB activating protein [Source:MGI Symbol;Acc:MGI:1914300]
ENSMUSG00000016427	11.4792	-0.14853	1.28947	-0.115187	0.908297	0.970674	Ndufa1	NADH:ubiquinone oxidoreductase subunit A1 [Source:MGI Symbol;Acc:MGI:1929511]
ENSMUSG00000016458	9.14052	4.28707	2.85912	1.49944	0.133761	0.441589	Wt1	WT1 transcription factor [Source:MGI Symbol;Acc:MGI:98968]
ENSMUSG00000016477	0.324586	-2.57953	6.13634	-0.420371	0.674215	NA	E2f3	E2F transcription factor 3 [Source:MGI Symbol;Acc:MGI:1096340]
ENSMUSG00000016481	1.06758	6.688	6.08948	1.09829	0.272079	NA	Cr1l	complement C3b/C4b receptor 1 like [Source:MGI Symbol;Acc:MGI:88513]
ENSMUSG00000016487	10.5295	-1.61134	2.37567	-0.678269	0.497601	0.814264	Ppfibp1	PTPRF interacting protein, binding protein 1 (liprin beta 1) [Source:MGI Symbol;Acc:MGI:1914783]
ENSMUSG00000016493	16.1262	0.842911	1.86344	0.452342	0.651023	0.884317	Cd46	CD46 antigen, complement regulatory protein [Source:MGI Symbol;Acc:MGI:1203290]
ENSMUSG00000016494	1.85604	-2.45541	4.9029	-0.500809	0.616506	NA	Cd34	CD34 antigen [Source:MGI Symbol;Acc:MGI:88329]
ENSMUSG00000016495	1.01375	-0.536198	6.08269	-0.0881515	0.929756	NA	Plgrkt	plasminogen receptor, C-terminal lysine transmembrane protein [Source:MGI Symbol;Acc:MGI:1915009]
ENSMUSG00000016496	1.21031	3.21352	5.71681	0.562117	0.574036	NA	Cd274	CD274 antigen [Source:MGI Symbol;Acc:MGI:1926446]
ENSMUSG00000016498	0	NA	NA	NA	NA	NA	Pdcd1lg2	programmed cell death 1 ligand 2 [Source:MGI Symbol;Acc:MGI:1930125]
ENSMUSG00000016503	1.75095	0.65461	3.27783	0.199708	0.841709	NA	Gtf3a	general transcription factor III A [Source:MGI Symbol;Acc:MGI:1913846]
ENSMUSG00000016510	6.12869	-0.66332	2.08642	-0.317922	0.750544	0.923289	Mtif3	mitochondrial translational initiation factor 3 [Source:MGI Symbol;Acc:MGI:1923616]
ENSMUSG00000016520	32.5437	1.81274	1.3029	1.3913	0.164133	0.491466	Lnx2	ligand of numb-protein X 2 [Source:MGI Symbol;Acc:MGI:2155959]
ENSMUSG00000016524	0	NA	NA	NA	NA	NA	Il19	interleukin 19 [Source:MGI Symbol;Acc:MGI:1890472]
ENSMUSG00000016526	270.044	-0.361561	0.209898	-1.72256	0.084969	0.344061	Dyrk3	dual-specificity tyrosine phosphorylation regulated kinase 3 [Source:MGI Symbol;Acc:MGI:1330300]
ENSMUSG00000016528	13.709	-1.95256	1.39349	-1.4012	0.161154	0.488368	Mapkapk2	MAP kinase-activated protein kinase 2 [Source:MGI Symbol;Acc:MGI:109298]
ENSMUSG00000016529	1.73385	1.33442	3.74581	0.356243	0.721658	NA	Il10	interleukin 10 [Source:MGI Symbol;Acc:MGI:96537]
ENSMUSG00000016534	55.7341	0.910202	1.59448	0.570846	0.568104	0.852697	Lamp2	lysosomal-associated membrane protein 2 [Source:MGI Symbol;Acc:MGI:96748]
ENSMUSG00000016541	376.268	-0.437698	0.176374	-2.48164	0.0130778	0.09767	Atxn10	ataxin 10 [Source:MGI Symbol;Acc:MGI:1859293]
ENSMUSG00000016552	0.576524	2.41898	6.12265	0.395087	0.692778	NA	Foxred2	FAD-dependent oxidoreductase domain containing 2 [Source:MGI Symbol;Acc:MGI:106315]
ENSMUSG00000016554	93.4877	-1.33281	0.600736	-2.21862	0.0265126	0.161727	Eif3d	eukaryotic translation initiation factor 3, subunit D [Source:MGI Symbol;Acc:MGI:1933181]
ENSMUSG00000016559	49.7168	-0.777051	1.74804	-0.444526	0.656662	0.885876	H3f3b	H3.3 histone B [Source:MGI Symbol;Acc:MGI:1101768]
ENSMUSG00000016619	80.2949	-0.211413	0.426927	-0.495198	0.62046	0.874127	Nup50	nucleoporin 50 [Source:MGI Symbol;Acc:MGI:1351502]
ENSMUSG00000016624	1.34321	4.30041	5.65307	0.760721	0.446823	NA	Phf21b	PHD finger protein 21B [Source:MGI Symbol;Acc:MGI:2443812]
ENSMUSG00000016626	85.397	-0.512581	0.348005	-1.47291	0.140774	0.453228	Nlrp14	NLR family, pyrin domain containing 14 [Source:MGI Symbol;Acc:MGI:1924108]
ENSMUSG00000016637	11.3562	-0.73032	1.03935	-0.702668	0.482262	0.804959	Ift27	intraflagellar transport 27 [Source:MGI Symbol;Acc:MGI:1914292]
ENSMUSG00000016664	18.2649	0.586113	1.94195	0.301817	0.762792	0.928763	Pacsin2	protein kinase C and casein kinase substrate in neurons 2 [Source:MGI Symbol;Acc:MGI:1345153]
ENSMUSG00000016756	0	NA	NA	NA	NA	NA	Cmah	cytidine monophospho-N-acetylneuraminic acid hydroxylase [Source:MGI Symbol;Acc:MGI:103227]
ENSMUSG00000016757	6.20053	1.48202	2.59442	0.571235	0.567841	0.852697	Ttll12	tubulin tyrosine ligase-like family, member 12 [Source:MGI Symbol;Acc:MGI:3039573]
ENSMUSG00000016758	1.1806	1.78523	6.04589	0.295279	0.767781	NA	Bik	BCL2-interacting killer [Source:MGI Symbol;Acc:MGI:1206591]
ENSMUSG00000016763	0	NA	NA	NA	NA	NA	Scube1	signal peptide, CUB domain, EGF-like 1 [Source:MGI Symbol;Acc:MGI:1890616]
ENSMUSG00000016831	89.917	-0.351556	0.491896	-0.714696	0.474797	0.798649	Tox4	TOX high mobility group box family member 4 [Source:MGI Symbol;Acc:MGI:1915389]
ENSMUSG00000016833	18.1962	-2.18026	1.88679	-1.15554	0.247868	0.602157	Mrps18c	mitochondrial ribosomal protein S18C [Source:MGI Symbol;Acc:MGI:1915985]
ENSMUSG00000016918	3.49624	4.69099	3.6445	1.28714	0.198045	NA	Sulf1	sulfatase 1 [Source:MGI Symbol;Acc:MGI:2138563]
ENSMUSG00000016921	27.7194	-0.871387	1.93138	-0.451173	0.651865	0.884853	Srsf6	serine and arginine-rich splicing factor 6 [Source:MGI Symbol;Acc:MGI:1915246]
ENSMUSG00000016933	11.199	0.0692551	1.99336	0.0347429	0.972285	0.990564	Plcg1	phospholipase C, gamma 1 [Source:MGI Symbol;Acc:MGI:97615]
ENSMUSG00000016940	0.897655	-0.311173	6.06765	-0.051284	0.959099	NA	Kctd2	potassium channel tetramerisation domain containing 2 [Source:MGI Symbol;Acc:MGI:1917632]
ENSMUSG00000016942	0.0977509	3.17454	6.23278	0.50933	0.610521	NA	Tmprss6	transmembrane serine protease 6 [Source:MGI Symbol;Acc:MGI:1919003]
ENSMUSG00000016946	8.82668	-0.98104	1.3767	-0.7126	0.476093	0.799822	Kctd5	potassium channel tetramerisation domain containing 5 [Source:MGI Symbol;Acc:MGI:1916509]
ENSMUSG00000016982	228.106	0.250566	0.31429	0.797246	0.425308	0.766106	Pom121l2	POM121 transmembrane nucleoporin like 2 [Source:MGI Symbol;Acc:MGI:2684870]
ENSMUSG00000016984	7.97427	-2.72438	1.55719	-1.74955	0.0801952	0.334029	Etaa1	Ewing tumor-associated antigen 1 [Source:MGI Symbol;Acc:MGI:1915395]
ENSMUSG00000016995	0.0219423	1.25104	6.23278	0.200719	0.840918	NA	Matn4	matrilin 4 [Source:MGI Symbol;Acc:MGI:1328314]
ENSMUSG00000016998	1.36934	-5.14527	3.63222	-1.41656	0.156611	NA	Svs4	seminal vesicle secretory protein 4 [Source:MGI Symbol;Acc:MGI:98450]
ENSMUSG00000017000	0.857322	5.46266	6.13646	0.890198	0.373359	NA	Svs6	seminal vesicle secretory protein 6 [Source:MGI Symbol;Acc:MGI:106178]
ENSMUSG00000017002	0	NA	NA	NA	NA	NA	Slpi	secretory leukocyte peptidase inhibitor [Source:MGI Symbol;Acc:MGI:109297]
ENSMUSG00000017003	0	NA	NA	NA	NA	NA	Svs3a	seminal vesicle secretory protein 3A [Source:MGI Symbol;Acc:MGI:1927635]
ENSMUSG00000017004	2.07645	2.59643	5.98108	0.434107	0.664211	NA	Svs5	seminal vesicle secretory protein 5 [Source:MGI Symbol;Acc:MGI:98453]
ENSMUSG00000017007	0.439803	-0.234817	6.17689	-0.0380154	0.969675	NA	Rbpjl	recombination signal binding protein for immunoglobulin kappa J region-like [Source:MGI Symbol;Acc:MGI:1196616]
ENSMUSG00000017009	11.4018	-1.0462	1.22951	-0.850907	0.394821	0.741711	Sdc4	syndecan 4 [Source:MGI Symbol;Acc:MGI:1349164]
ENSMUSG00000017049	370.427	3.3795	1.46058	2.31381	0.0206782	0.136245	Ccdc70	coiled-coil domain containing 70 [Source:MGI Symbol;Acc:MGI:1915179]
ENSMUSG00000017057	1.22849	-1.69581	6.00687	-0.282312	0.777704	NA	Il13ra1	interleukin 13 receptor, alpha 1 [Source:MGI Symbol;Acc:MGI:105052]
ENSMUSG00000017064	0.66406	0.0961862	6.19585	0.0155243	0.987614	NA	Prl5a1	prolactin family 5, subfamily a, member 1 [Source:MGI Symbol;Acc:MGI:106332]
ENSMUSG00000017119	558.095	3.55794	1.6751	2.12402	0.0336686	0.189825	Nbr1	NBR1, autophagy cargo receptor [Source:MGI Symbol;Acc:MGI:108498]
ENSMUSG00000017132	46.8998	1.70857	1.76981	0.965397	0.334346	0.691263	Cyth1	cytohesin 1 [Source:MGI Symbol;Acc:MGI:1334257]
ENSMUSG00000017144	1.26518	-2.46554	4.37997	-0.562911	0.573495	NA	Rnd3	Rho family GTPase 3 [Source:MGI Symbol;Acc:MGI:1921444]
ENSMUSG00000017146	31.2736	-2.96503	0.782882	-3.78733	0.000152275	0.0025259	Brca1	breast cancer 1, early onset [Source:MGI Symbol;Acc:MGI:104537]
ENSMUSG00000017165	0.232528	0.81631	6.21592	0.131326	0.895518	NA	Gast	gastrin [Source:MGI Symbol;Acc:MGI:104768]
ENSMUSG00000017167	3.13469	2.06995	3.79115	0.545995	0.585069	NA	Cntnap1	contactin associated protein-like 1 [Source:MGI Symbol;Acc:MGI:1858201]
ENSMUSG00000017176	23.5994	0.46398	1.79776	0.258088	0.796339	0.938067	Nt5c3b	5'-nucleotidase, cytosolic IIIB [Source:MGI Symbol;Acc:MGI:1915356]
ENSMUSG00000017188	24.1354	0.0811058	0.875785	0.0926092	0.926214	0.976458	Coa3	cytochrome C oxidase assembly factor 3 [Source:MGI Symbol;Acc:MGI:1098757]
ENSMUSG00000017195	44.9567	-2.05955	1.73774	-1.18519	0.235944	0.586844	Zpbp2	zona pellucida binding protein 2 [Source:MGI Symbol;Acc:MGI:1916626]
ENSMUSG00000017204	33.0774	0.778831	0.74235	1.04914	0.294113	0.652014	Gsdma	gasdermin A [Source:MGI Symbol;Acc:MGI:1889509]
ENSMUSG00000017210	87.4426	0.90127	1.64642	0.54741	0.584097	0.858619	Med24	mediator complex subunit 24 [Source:MGI Symbol;Acc:MGI:1344385]
ENSMUSG00000017211	0	NA	NA	NA	NA	NA	Gsdma2	gasdermin A2 [Source:MGI Symbol;Acc:MGI:1921490]
ENSMUSG00000017221	50.6041	0.314973	0.572428	0.55024	0.582155	0.857842	Psmd3	proteasome (prosome, macropain) 26S subunit, non-ATPase, 3 [Source:MGI Symbol;Acc:MGI:98858]
ENSMUSG00000017264	110.633	-0.934645	1.69727	-0.550674	0.581857	0.857842	Exosc10	exosome component 10 [Source:MGI Symbol;Acc:MGI:1355322]
ENSMUSG00000017286	19.5198	-1.34729	1.73654	-0.775848	0.437839	0.775328	Glod4	glyoxalase domain containing 4 [Source:MGI Symbol;Acc:MGI:1914451]
ENSMUSG00000017288	16.2579	-1.15974	1.94069	-0.59759	0.550113	0.842729	Vps53	VPS53 GARP complex subunit [Source:MGI Symbol;Acc:MGI:1915549]
ENSMUSG00000017291	24.1192	1.56413	1.77482	0.881288	0.378162	0.726912	Taok1	TAO kinase 1 [Source:MGI Symbol;Acc:MGI:1914490]
ENSMUSG00000017299	22.2841	-0.165455	0.72204	-0.22915	0.818752	0.945099	Dnttip1	deoxynucleotidyltransferase, terminal, interacting protein 1 [Source:MGI Symbol;Acc:MGI:1923483]
ENSMUSG00000017300	0.952615	10.8531	6.11426	1.77505	0.0758894	NA	Tnnc2	troponin C2, fast [Source:MGI Symbol;Acc:MGI:98780]
ENSMUSG00000017307	9.75939	-2.096	2.23348	-0.938444	0.348016	0.701448	Acot8	acyl-CoA thioesterase 8 [Source:MGI Symbol;Acc:MGI:2158201]
ENSMUSG00000017309	0.956297	9.80993	6.09847	1.60859	0.107707	NA	Cd300lg	CD300 molecule like family member G [Source:MGI Symbol;Acc:MGI:1289168]
ENSMUSG00000017310	0.990968	3.44426	6.17662	0.557628	0.577099	NA	Spint4	serine protease inhibitor, Kunitz type 4 [Source:MGI Symbol;Acc:MGI:1925489]
ENSMUSG00000017311	0.276198	3.93176	6.2108	0.633051	0.5267	NA	Pyy	peptide YY [Source:MGI Symbol;Acc:MGI:99924]
ENSMUSG00000017314	0.0873128	3.14676	6.23021	0.505081	0.613502	NA	Mpp2	membrane protein, palmitoylated 2 (MAGUK p55 subfamily member 2) [Source:MGI Symbol;Acc:MGI:1858257]
ENSMUSG00000017316	0	NA	NA	NA	NA	NA	Ppy	pancreatic polypeptide [Source:MGI Symbol;Acc:MGI:97753]
ENSMUSG00000017344	1.1195	-1.615	5.11741	-0.31559	0.752314	NA	Vtn	vitronectin [Source:MGI Symbol;Acc:MGI:98940]
ENSMUSG00000017376	6.18793	-3.08148	2.2574	-1.36506	0.172235	0.507156	Nlk	nemo like kinase [Source:MGI Symbol;Acc:MGI:1201387]
ENSMUSG00000017386	1.56667	-1.22824	5.15438	-0.238291	0.811656	NA	Traf4	TNF receptor associated factor 4 [Source:MGI Symbol;Acc:MGI:1202880]
ENSMUSG00000017390	1.70778	0.416824	5.46282	0.076302	0.939179	NA	Aldoc	aldolase C, fructose-bisphosphate [Source:MGI Symbol;Acc:MGI:101863]
ENSMUSG00000017400	5.50177	2.38525	2.03873	1.16997	0.242013	0.595111	Stac2	SH3 and cysteine rich domain 2 [Source:MGI Symbol;Acc:MGI:2144518]
ENSMUSG00000017404	0.764984	1.68448	6.1148	0.275477	0.78295	NA	Rpl19	ribosomal protein L19 [Source:MGI Symbol;Acc:MGI:98020]
ENSMUSG00000017405	8.67375	2.60527	1.7566	1.48313	0.13804	0.448764	Nek8	NIMA (never in mitosis gene a)-related expressed kinase 8 [Source:MGI Symbol;Acc:MGI:1890646]
ENSMUSG00000017412	0	NA	NA	NA	NA	NA	Cacnb4	calcium channel, voltage-dependent, beta 4 subunit [Source:MGI Symbol;Acc:MGI:103301]
ENSMUSG00000017417	21.2332	1.4297	0.825888	1.73111	0.0834322	0.339538	Plxdc1	plexin domain containing 1 [Source:MGI Symbol;Acc:MGI:1919574]
ENSMUSG00000017418	11.2838	-0.789214	1.13907	-0.692861	0.488397	0.808921	Arl5b	ADP-ribosylation factor-like 5B [Source:MGI Symbol;Acc:MGI:1923119]
ENSMUSG00000017421	26.1102	-1.01664	1.80925	-0.561915	0.574174	0.854146	Zfp207	zinc finger protein 207 [Source:MGI Symbol;Acc:MGI:1340045]
ENSMUSG00000017428	5.0065	0.522065	2.56281	0.203708	0.838581	0.951056	Psmd11	proteasome (prosome, macropain) 26S subunit, non-ATPase, 11 [Source:MGI Symbol;Acc:MGI:1916327]
ENSMUSG00000017446	0.373019	-1.98852	6.13825	-0.323955	0.745972	NA	C1qtnf1	C1q and tumor necrosis factor related protein 1 [Source:MGI Symbol;Acc:MGI:1919254]
ENSMUSG00000017453	0.1765	3.17449	6.23278	0.509321	0.610527	NA	Pipox	pipecolic acid oxidase [Source:MGI Symbol;Acc:MGI:1197006]
ENSMUSG00000017466	37.6142	1.19678	0.837649	1.42873	0.153081	0.477212	Timp2	tissue inhibitor of metalloproteinase 2 [Source:MGI Symbol;Acc:MGI:98753]
ENSMUSG00000017478	20.3959	-0.0586233	1.8292	-0.0320485	0.974433	0.991207	Zc3h18	zinc finger CCCH-type containing 18 [Source:MGI Symbol;Acc:MGI:1923264]
ENSMUSG00000017485	31.3037	-2.26065	0.693821	-3.25827	0.00112095	0.0141503	Top2b	topoisomerase (DNA) II beta [Source:MGI Symbol;Acc:MGI:98791]
ENSMUSG00000017491	0.576515	4.53945	6.17267	0.735412	0.462089	NA	Rarb	retinoic acid receptor, beta [Source:MGI Symbol;Acc:MGI:97857]
ENSMUSG00000017493	3.18001	3.39722	2.62215	1.29559	0.195118	NA	Igfbp4	insulin-like growth factor binding protein 4 [Source:MGI Symbol;Acc:MGI:96439]
ENSMUSG00000017499	8.20362	-2.36337	2.10786	-1.12121	0.262197	0.618022	Cdc6	cell division cycle 6 [Source:MGI Symbol;Acc:MGI:1345150]
ENSMUSG00000017548	7.27983	-0.901434	2.26365	-0.398221	0.690467	0.900713	Suz12	SUZ12 polycomb repressive complex 2 subunit [Source:MGI Symbol;Acc:MGI:1261758]
ENSMUSG00000017550	7.61505	-4.9779	6.08025	-0.818701	0.412957	0.758876	Atad5	ATPase family, AAA domain containing 5 [Source:MGI Symbol;Acc:MGI:2442925]
ENSMUSG00000017561	3.5247	0.449407	2.51221	0.178889	0.858025	NA	Crlf3	cytokine receptor-like factor 3 [Source:MGI Symbol;Acc:MGI:1860086]
ENSMUSG00000017588	0	NA	NA	NA	NA	NA	Krt27	keratin 27 [Source:MGI Symbol;Acc:MGI:1339999]
ENSMUSG00000017607	1.14496	-0.539319	4.01647	-0.134277	0.893184	NA	Tns4	tensin 4 [Source:MGI Symbol;Acc:MGI:2144377]
ENSMUSG00000017615	1.94524	-0.583666	4.89888	-0.119143	0.905162	NA	Tnfaip1	tumor necrosis factor, alpha-induced protein 1 (endothelial) [Source:MGI Symbol;Acc:MGI:104961]
ENSMUSG00000017631	3.83384	0.523461	2.89986	0.180512	0.85675	NA	Abr	active BCR-related gene [Source:MGI Symbol;Acc:MGI:107771]
ENSMUSG00000017639	40.5133	0.921488	0.694097	1.32761	0.184308	0.52347	Rab11fip4	RAB11 family interacting protein 4 (class II) [Source:MGI Symbol;Acc:MGI:2442920]
ENSMUSG00000017652	0.344457	-2.32221	6.14156	-0.378115	0.705345	NA	Cd40	CD40 antigen [Source:MGI Symbol;Acc:MGI:88336]
ENSMUSG00000017664	4.69552	3.38769	3.39388	0.998177	0.318194	NA	Slc35c2	solute carrier family 35, member C2 [Source:MGI Symbol;Acc:MGI:2385166]
ENSMUSG00000017667	5.42757	4.13065	2.43178	1.69862	0.0893915	0.354529	Zfp334	zinc finger protein 334 [Source:MGI Symbol;Acc:MGI:2388656]
ENSMUSG00000017670	3.8148	1.87087	2.70857	0.690723	0.489739	NA	Elmo2	engulfment and cell motility 2 [Source:MGI Symbol;Acc:MGI:2153045]
ENSMUSG00000017677	10.6635	-1.67556	1.94214	-0.862737	0.388282	0.735105	Wsb1	WD repeat and SOCS box-containing 1 [Source:MGI Symbol;Acc:MGI:1926139]
ENSMUSG00000017679	0.519068	-0.387501	6.10489	-0.0634739	0.949389	NA	Ttpal	tocopherol (alpha) transfer protein-like [Source:MGI Symbol;Acc:MGI:1923330]
ENSMUSG00000017686	15.4587	1.37483	1.84123	0.746687	0.455252	0.786481	Rhot1	ras homolog family member T1 [Source:MGI Symbol;Acc:MGI:1926078]
ENSMUSG00000017688	0	NA	NA	NA	NA	NA	Hnf4g	hepatocyte nuclear factor 4, gamma [Source:MGI Symbol;Acc:MGI:1353604]
ENSMUSG00000017692	0.783328	-0.852166	6.11123	-0.139443	0.8891	NA	Rhbdl3	rhomboid like 3 [Source:MGI Symbol;Acc:MGI:2179276]
ENSMUSG00000017697	16.5564	1.51361	1.85562	0.815689	0.414678	0.759049	Ada	adenosine deaminase [Source:MGI Symbol;Acc:MGI:87916]
ENSMUSG00000017707	218.579	0.555379	0.31405	1.76844	0.0769871	0.326227	Serinc3	serine incorporator 3 [Source:MGI Symbol;Acc:MGI:1349457]
ENSMUSG00000017713	0	NA	NA	NA	NA	NA	Tha1	threonine aldolase 1 [Source:MGI Symbol;Acc:MGI:1919026]
ENSMUSG00000017715	20.9666	2.9941	1.98274	1.51008	0.131023	0.437591	Pgs1	phosphatidylglycerophosphate synthase 1 [Source:MGI Symbol;Acc:MGI:1921701]
ENSMUSG00000017716	19.1376	-1.66143	1.62022	-1.02544	0.305157	0.664041	Birc5	baculoviral IAP repeat-containing 5 [Source:MGI Symbol;Acc:MGI:1203517]
ENSMUSG00000017718	0.852731	7.38008	6.09437	1.21097	0.225908	NA	Afmid	arylformamidase [Source:MGI Symbol;Acc:MGI:2448704]
ENSMUSG00000017720	152.933	0.974745	0.283709	3.43572	0.000590991	0.00824162	Trp53tg5	transformation related protein 53 target 5 [Source:MGI Symbol;Acc:MGI:1920853]
ENSMUSG00000017721	15.3012	-2.85021	1.57558	-1.80899	0.0704523	0.308964	Pigt	phosphatidylinositol glycan anchor biosynthesis, class T [Source:MGI Symbol;Acc:MGI:1926178]
ENSMUSG00000017723	0	NA	NA	NA	NA	NA	Wfdc2	WAP four-disulfide core domain 2 [Source:MGI Symbol;Acc:MGI:1914951]
ENSMUSG00000017724	0	NA	NA	NA	NA	NA	Etv4	ets variant 4 [Source:MGI Symbol;Acc:MGI:99423]
ENSMUSG00000017733	9.73273	0.857108	2.06987	0.414089	0.678809	0.896638	Eppin	epididymal peptidase inhibitor [Source:MGI Symbol;Acc:MGI:1922776]
ENSMUSG00000017734	2.48817	1.46501	3.7377	0.391954	0.695092	NA	Dbndd2	dysbindin domain containing 2 [Source:MGI Symbol;Acc:MGI:106562]
ENSMUSG00000017737	5.16122	1.25948	2.41631	0.521243	0.602197	0.865898	Mmp9	matrix metallopeptidase 9 [Source:MGI Symbol;Acc:MGI:97011]
ENSMUSG00000017740	5.20652	1.46464	2.13283	0.686714	0.492263	0.811155	Slc12a5	solute carrier family 12, member 5 [Source:MGI Symbol;Acc:MGI:1862037]
ENSMUSG00000017747	5.93436	4.45155	2.2096	2.01464	0.0439422	0.227907	Ghdc	GH3 domain containing [Source:MGI Symbol;Acc:MGI:1931556]
ENSMUSG00000017754	5.29037	-2.51571	2.9308	-0.858372	0.390687	0.737609	Pltp	phospholipid transfer protein [Source:MGI Symbol;Acc:MGI:103151]
ENSMUSG00000017756	19.0278	0.842983	1.81524	0.464392	0.642367	0.880739	Slc12a7	solute carrier family 12, member 7 [Source:MGI Symbol;Acc:MGI:1342283]
ENSMUSG00000017760	14.4817	-1.33364	1.40812	-0.947111	0.343582	0.698166	Ctsa	cathepsin A [Source:MGI Symbol;Acc:MGI:97748]
ENSMUSG00000017764	90.0202	1.03909	0.741882	1.40062	0.161328	0.48874	Zswim1	zinc finger SWIM-type containing 1 [Source:MGI Symbol;Acc:MGI:1919221]
ENSMUSG00000017765	1.43641	-0.870907	5.90027	-0.147605	0.882655	NA	Slc12a4	solute carrier family 12, member 4 [Source:MGI Symbol;Acc:MGI:1309465]
ENSMUSG00000017767	57.1763	0.421944	0.548243	0.769629	0.44152	0.778587	Spata25	spermatogenesis associated 25 [Source:MGI Symbol;Acc:MGI:1922892]
ENSMUSG00000017774	22.3635	0.868561	1.63925	0.529853	0.596214	0.862617	Myo1c	myosin IC [Source:MGI Symbol;Acc:MGI:106612]
ENSMUSG00000017776	11.8616	0.535482	2.03691	0.26289	0.792636	0.938067	Crk	v-crk avian sarcoma virus CT10 oncogene homolog [Source:MGI Symbol;Acc:MGI:88508]
ENSMUSG00000017778	0	NA	NA	NA	NA	NA	Cox7c	cytochrome c oxidase subunit 7C [Source:MGI Symbol;Acc:MGI:103226]
ENSMUSG00000017781	20.3742	-0.327754	1.79442	-0.182652	0.855071	0.957643	Pitpna	phosphatidylinositol transfer protein, alpha [Source:MGI Symbol;Acc:MGI:99887]
ENSMUSG00000017801	1.16648	-0.419451	4.36584	-0.0960758	0.92346	NA	Mlx	MAX-like protein X [Source:MGI Symbol;Acc:MGI:108398]
ENSMUSG00000017802	37.4015	1.74094	1.75079	0.994373	0.320041	0.676203	Retreg3	reticulophagy regulator family member 3 [Source:MGI Symbol;Acc:MGI:1915248]
ENSMUSG00000017817	1.23503	9.65076	6.10815	1.57998	0.114112	NA	Jph2	junctophilin 2 [Source:MGI Symbol;Acc:MGI:1891496]
ENSMUSG00000017830	46.4522	-0.724338	0.591538	-1.2245	0.220764	0.567978	Dhx58	DExH-box helicase 58 [Source:MGI Symbol;Acc:MGI:1931560]
ENSMUSG00000017831	97.604	-2.04183	1.01122	-2.01919	0.043468	0.226116	Rab5a	RAB5A, member RAS oncogene family [Source:MGI Symbol;Acc:MGI:105926]
ENSMUSG00000017832	761.343	4.63388	1.6804	2.75761	0.00582261	0.0525815	Hspb9	heat shock protein, alpha-crystallin-related, B9 [Source:MGI Symbol;Acc:MGI:1922732]
ENSMUSG00000017837	54.8726	0.750799	0.607127	1.23664	0.21622	0.564025	Nkiras2	NFKB inhibitor interacting Ras-like protein 2 [Source:MGI Symbol;Acc:MGI:1919216]
ENSMUSG00000017843	97.6044	2.77419	1.70936	1.62294	0.104602	0.388154	Ppp2r5c	protein phosphatase 2, regulatory subunit B', gamma [Source:MGI Symbol;Acc:MGI:1349475]
ENSMUSG00000017858	47.3853	-0.717393	0.556952	-1.28807	0.197721	0.539837	Ift52	intraflagellar transport 52 [Source:MGI Symbol;Acc:MGI:2387217]
ENSMUSG00000017861	9.74852	0.0453794	1.18629	0.0382533	0.969486	0.988727	Mybl2	myeloblastosis oncogene-like 2 [Source:MGI Symbol;Acc:MGI:101785]
ENSMUSG00000017868	1.7939	0.593664	5.50508	0.107839	0.914123	NA	Sgk2	serum/glucocorticoid regulated kinase 2 [Source:MGI Symbol;Acc:MGI:1351318]
ENSMUSG00000017897	0.698503	4.9299	6.17421	0.798467	0.4246	NA	Eya2	EYA transcriptional coactivator and phosphatase 2 [Source:MGI Symbol;Acc:MGI:109341]
ENSMUSG00000017922	1.05847	-4.23188	6.12414	-0.691016	0.489556	NA	Prl3c1	prolactin family 3, subfamily c, member 1 [Source:MGI Symbol;Acc:MGI:1351649]
ENSMUSG00000017929	6.71648	1.56437	2.00203	0.781393	0.434571	0.772465	B4galt5	UDP-Gal:betaGlcNAc beta 1,4-galactosyltransferase, polypeptide 5 [Source:MGI Symbol;Acc:MGI:1927169]
ENSMUSG00000017943	0.354004	4.59629	6.18389	0.743269	0.457319	NA	Gdap1l1	ganglioside-induced differentiation-associated protein 1-like 1 [Source:MGI Symbol;Acc:MGI:2385163]
ENSMUSG00000017950	0	NA	NA	NA	NA	NA	Hnf4a	hepatic nuclear factor 4, alpha [Source:MGI Symbol;Acc:MGI:109128]
ENSMUSG00000017969	1.53941	-2.54387	4.21307	-0.603803	0.545975	NA	Ptgis	prostaglandin I2 (prostacyclin) synthase [Source:MGI Symbol;Acc:MGI:1097156]
ENSMUSG00000017978	2.56451	-0.677527	3.56767	-0.189908	0.849382	NA	Cadps2	Ca2+-dependent activator protein for secretion 2 [Source:MGI Symbol;Acc:MGI:2443963]
ENSMUSG00000017999	34.9301	-0.577766	0.657031	-0.879358	0.379207	0.727294	Ddx27	DEAD box helicase 27 [Source:MGI Symbol;Acc:MGI:2385884]
ENSMUSG00000018001	21.3348	-0.969662	1.3954	-0.694898	0.487119	0.808445	Cyth3	cytohesin 3 [Source:MGI Symbol;Acc:MGI:1335107]
ENSMUSG00000018008	0.504278	1.7926	6.18687	0.289743	0.772013	NA	Cyth4	cytohesin 4 [Source:MGI Symbol;Acc:MGI:2441702]
ENSMUSG00000018012	0	NA	NA	NA	NA	NA	Rac3	Rac family small GTPase 3 [Source:MGI Symbol;Acc:MGI:2180784]
ENSMUSG00000018040	150.075	-0.392175	0.351816	-1.11472	0.264972	0.621075	Rrp7a	ribosomal RNA processing 7 homolog A [Source:MGI Symbol;Acc:MGI:1922028]
ENSMUSG00000018042	13.2112	-0.36365	1.23139	-0.295316	0.767752	0.929515	Cyb5r3	cytochrome b5 reductase 3 [Source:MGI Symbol;Acc:MGI:94893]
ENSMUSG00000018068	15.5582	-1.06271	1.17874	-0.901566	0.367288	0.717797	Ints2	integrator complex subunit 2 [Source:MGI Symbol;Acc:MGI:1917672]
ENSMUSG00000018076	24.2808	3.46563	1.34363	2.5793	0.00990007	0.0797318	Med13l	mediator complex subunit 13-like [Source:MGI Symbol;Acc:MGI:2670178]
ENSMUSG00000018102	8.66151	0.51535	1.57937	0.326301	0.744197	0.921907	H2bc4	H2B clustered histone 4 [Source:MGI Symbol;Acc:MGI:1915274]
ENSMUSG00000018126	0.195502	3.7209	6.21979	0.598236	0.549682	NA	Baiap2l2	BAI1-associated protein 2-like 2 [Source:MGI Symbol;Acc:MGI:2652819]
ENSMUSG00000018143	4.73806	-2.88613	1.88731	-1.52922	0.126209	0.429793	Mafk	v-maf musculoaponeurotic fibrosarcoma oncogene family, protein K (avian) [Source:MGI Symbol;Acc:MGI:99951]
ENSMUSG00000018160	53.5587	-1.07036	1.54767	-0.691594	0.489192	0.809394	Med1	mediator complex subunit 1 [Source:MGI Symbol;Acc:MGI:1100846]
ENSMUSG00000018166	8.57555	1.07535	1.46672	0.733165	0.463458	0.79101	Erbb3	erb-b2 receptor tyrosine kinase 3 [Source:MGI Symbol;Acc:MGI:95411]
ENSMUSG00000018167	3.89014	-4.38948	2.97585	-1.47503	0.140203	NA	Stard3	StAR related lipid transfer domain containing 3 [Source:MGI Symbol;Acc:MGI:1929618]
ENSMUSG00000018168	0.111	3.12292	6.22788	0.501441	0.616061	NA	Ikzf3	IKAROS family zinc finger 3 [Source:MGI Symbol;Acc:MGI:1342542]
ENSMUSG00000018169	0.166015	1.25104	6.23278	0.200719	0.840918	NA	Mfng	MFNG O-fucosylpeptide 3-beta-N-acetylglucosaminyltransferase [Source:MGI Symbol;Acc:MGI:1095404]
ENSMUSG00000018171	29.2043	-2.57255	1.04844	-2.45371	0.0141392	0.102914	Vmp1	vacuole membrane protein 1 [Source:MGI Symbol;Acc:MGI:1923159]
ENSMUSG00000018189	64.1752	-2.102	1.75054	-1.20078	0.229837	0.579941	Uchl5	ubiquitin carboxyl-terminal esterase L5 [Source:MGI Symbol;Acc:MGI:1914848]
ENSMUSG00000018196	31.1227	3.17511	1.80914	1.75504	0.0792516	0.332147	Glrx2	glutaredoxin 2 [Source:MGI Symbol;Acc:MGI:1916617]
ENSMUSG00000018199	2.1276	-1.68265	2.69675	-0.623952	0.532659	NA	Ro60	Ro60, Y RNA binding protein [Source:MGI Symbol;Acc:MGI:106652]
ENSMUSG00000018209	15.9589	1.60673	1.93423	0.830681	0.406154	0.75152	Stk4	serine/threonine kinase 4 [Source:MGI Symbol;Acc:MGI:1929004]
ENSMUSG00000018211	0	NA	NA	NA	NA	NA	Wfdc15b	WAP four-disulfide core domain 15B [Source:MGI Symbol;Acc:MGI:2445041]
ENSMUSG00000018217	2.09792	-1.30833	4.86757	-0.268786	0.788094	NA	Pmp22	peripheral myelin protein 22 [Source:MGI Symbol;Acc:MGI:97631]
ENSMUSG00000018238	13.6213	1.24615	1.97628	0.630556	0.528331	0.831978	Gdf9	growth differentiation factor 9 [Source:MGI Symbol;Acc:MGI:95692]
ENSMUSG00000018239	3.91616	2.61697	3.06136	0.85484	0.39264	NA	Zcchc10	zinc finger, CCHC domain containing 10 [Source:MGI Symbol;Acc:MGI:1196228]
ENSMUSG00000018259	0	NA	NA	NA	NA	NA	Prl8a2	prolactin family 8, subfamily a, member 2 [Source:MGI Symbol;Acc:MGI:894281]
ENSMUSG00000018263	4.9946	4.36711	2.20647	1.97922	0.0477908	0.239714	Tbx5	T-box 5 [Source:MGI Symbol;Acc:MGI:102541]
ENSMUSG00000018286	103.855	-1.23139	1.71722	-0.717085	0.473322	0.797564	Psmb6	proteasome (prosome, macropain) subunit, beta type 6 [Source:MGI Symbol;Acc:MGI:104880]
ENSMUSG00000018287	87.3465	-2.99874	1.62913	-1.8407	0.0656657	0.296735	Spag7	sperm associated antigen 7 [Source:MGI Symbol;Acc:MGI:107380]
ENSMUSG00000018293	21.5817	0.790443	1.78219	0.443523	0.657387	0.886423	Pfn1	profilin 1 [Source:MGI Symbol;Acc:MGI:97549]
ENSMUSG00000018322	25.3124	1.02876	1.79237	0.573965	0.565991	0.851508	Tomm34	translocase of outer mitochondrial membrane 34 [Source:MGI Symbol;Acc:MGI:1914395]
ENSMUSG00000018326	22.3714	-0.219605	0.842694	-0.260599	0.794402	0.938067	Ywhab	tyrosine 3-monooxygenase/tryptophan 5-monooxygenase activation protein, beta polypeptide [Source:MGI Symbol;Acc:MGI:1891917]
ENSMUSG00000018334	2.82464	3.48171	3.51292	0.991116	0.321629	NA	Ksr1	kinase suppressor of ras 1 [Source:MGI Symbol;Acc:MGI:105051]
ENSMUSG00000018339	1.20582	-0.401827	4.64008	-0.0865991	0.93099	NA	Gpx3	glutathione peroxidase 3 [Source:MGI Symbol;Acc:MGI:105102]
ENSMUSG00000018340	1.9857	-0.0422755	2.95315	-0.0143154	0.988578	NA	Anxa6	annexin A6 [Source:MGI Symbol;Acc:MGI:88255]
ENSMUSG00000018341	0	NA	NA	NA	NA	NA	Il12rb2	interleukin 12 receptor, beta 2 [Source:MGI Symbol;Acc:MGI:1270861]
ENSMUSG00000018347	6.30654	-0.798821	1.46817	-0.544094	0.586377	0.859889	Zkscan6	zinc finger with KRAB and SCAN domains 6 [Source:MGI Symbol;Acc:MGI:1289293]
ENSMUSG00000018362	1.93746	1.11103	3.22374	0.34464	0.730365	NA	Kpna2	karyopherin subunit alpha 2 [Source:MGI Symbol;Acc:MGI:103561]
ENSMUSG00000018363	12.4389	0.843896	1.87329	0.450489	0.652358	0.885069	Smurf2	SMAD specific E3 ubiquitin protein ligase 2 [Source:MGI Symbol;Acc:MGI:1913563]
ENSMUSG00000018372	30.0995	-0.856709	1.75553	-0.488005	0.625546	0.876098	Cep95	centrosomal protein 95 [Source:MGI Symbol;Acc:MGI:2443502]
ENSMUSG00000018377	4.81262	-0.325081	1.23508	-0.263206	0.792392	0.938067	Vezf1	vascular endothelial zinc finger 1 [Source:MGI Symbol;Acc:MGI:1313291]
ENSMUSG00000018378	0.206163	0.963992	6.18325	0.155904	0.876109	NA	Cuedc1	CUE domain containing 1 [Source:MGI Symbol;Acc:MGI:2144281]
ENSMUSG00000018379	34.9015	0.266719	1.78169	0.1497	0.881001	0.963342	Srsf1	serine and arginine-rich splicing factor 1 [Source:MGI Symbol;Acc:MGI:98283]
ENSMUSG00000018381	3576.03	-0.308672	1.6705	-0.184778	0.853403	0.957228	Abi3	ABI family member 3 [Source:MGI Symbol;Acc:MGI:1913860]
ENSMUSG00000018387	0.526607	-3.10824	6.12844	-0.507184	0.612026	NA	Shroom1	shroom family member 1 [Source:MGI Symbol;Acc:MGI:1919024]
ENSMUSG00000018395	88.6063	-1.21436	1.74207	-0.69708	0.485753	0.807945	Kif3a	kinesin family member 3A [Source:MGI Symbol;Acc:MGI:107689]
ENSMUSG00000018398	0.5446	1.8208	6.11437	0.297791	0.765863	NA	Septin8	septin 8 [Source:MGI Symbol;Acc:MGI:894310]
ENSMUSG00000018401	89.5718	1.76281	1.70762	1.03232	0.301923	0.660783	Mtmr4	myotubularin related protein 4 [Source:MGI Symbol;Acc:MGI:2180699]
ENSMUSG00000018405	1.09553	2.39107	5.65646	0.422715	0.672503	NA	Mrm1	mitochondrial rRNA methyltransferase 1 [Source:MGI Symbol;Acc:MGI:2443470]
ENSMUSG00000018411	0	NA	NA	NA	NA	NA	Mapt	microtubule-associated protein tau [Source:MGI Symbol;Acc:MGI:97180]
ENSMUSG00000018412	25.4909	2.64752	1.12253	2.35854	0.0183471	0.123997	Kansl1	KAT8 regulatory NSL complex subunit 1 [Source:MGI Symbol;Acc:MGI:1923969]
ENSMUSG00000018415	46.1398	1.17074	0.473752	2.4712	0.013466	0.0995402	Gid4	GID complex subunit 4, VID24 homolog [Source:MGI Symbol;Acc:MGI:1914021]
ENSMUSG00000018417	3.9018	-2.91471	3.22518	-0.903734	0.366136	NA	Myo1b	myosin IB [Source:MGI Symbol;Acc:MGI:107752]
ENSMUSG00000018425	243.78	-1.59577	0.240039	-6.64797	2.97e-11	1.6e-09	Dhx40	DEAH-box helicase 40 [Source:MGI Symbol;Acc:MGI:1914737]
ENSMUSG00000018427	3.89585	-0.758365	2.08248	-0.364164	0.715736	NA	Ypel2	yippee like 2 [Source:MGI Symbol;Acc:MGI:1925114]
ENSMUSG00000018428	1241.39	7.18724	1.61715	4.44438	8.81e-06	0.000199385	Akap1	A kinase anchor protein 1 [Source:MGI Symbol;Acc:MGI:104729]
ENSMUSG00000018433	10.0233	-2.31088	2.12452	-1.08772	0.276721	0.633817	Nol11	nucleolar protein 11 [Source:MGI Symbol;Acc:MGI:1916229]
ENSMUSG00000018442	12.5866	0.0479145	2.1016	0.0227991	0.981811	0.994477	Derl2	Der1-like domain family, member 2 [Source:MGI Symbol;Acc:MGI:2151483]
ENSMUSG00000018446	5.81591	-1.26961	2.34325	-0.541814	0.587946	0.860146	C1qbp	complement component 1, q subcomponent binding protein [Source:MGI Symbol;Acc:MGI:1194505]
ENSMUSG00000018449	7.33524	-2.18674	2.21672	-0.986475	0.3239	0.681307	Rpain	RPA interacting protein [Source:MGI Symbol;Acc:MGI:1916973]
ENSMUSG00000018451	0	NA	NA	NA	NA	NA	6330403K07Rik	RIKEN cDNA 6330403K07 gene [Source:MGI Symbol;Acc:MGI:1918001]
ENSMUSG00000018459	0.0950806	0.0799857	6.19762	0.0129059	0.989703	NA	Slc13a3	solute carrier family 13 (sodium-dependent dicarboxylate transporter), member 3 [Source:MGI Symbol;Acc:MGI:2149635]
ENSMUSG00000018470	4.75244	-1.64792	1.73318	-0.950805	0.341704	0.69686	Kcnab3	potassium voltage-gated channel, shaker-related subfamily, beta member 3 [Source:MGI Symbol;Acc:MGI:1336208]
ENSMUSG00000018474	27.1084	0.939774	1.77037	0.530835	0.595533	0.862617	Chd3	chromodomain helicase DNA binding protein 3 [Source:MGI Symbol;Acc:MGI:1344395]
ENSMUSG00000018476	166.955	0.782899	0.526896	1.48587	0.137314	0.447535	Kdm6b	KDM1 lysine (K)-specific demethylase 6B [Source:MGI Symbol;Acc:MGI:2448492]
ENSMUSG00000018479	71.1717	1.38888	1.40258	0.990231	0.322061	0.678799	Chct1	CHD1 helical C-terminal domain containing 1 [Source:MGI Symbol;Acc:MGI:1920884]
ENSMUSG00000018481	235.988	-0.298188	0.337699	-0.882999	0.377237	0.726332	Appbp2	amyloid beta precursor protein binding protein 2 [Source:MGI Symbol;Acc:MGI:1914134]
ENSMUSG00000018486	0.604794	0.712145	6.17692	0.115291	0.908214	NA	Wnt9b	wingless-type MMTV integration site family, member 9B [Source:MGI Symbol;Acc:MGI:1197020]
ENSMUSG00000018500	5.2552	-1.33322	2.10457	-0.633488	0.526415	0.830955	Adora2b	adenosine A2b receptor [Source:MGI Symbol;Acc:MGI:99403]
ENSMUSG00000018501	62.8147	-0.317746	1.7149	-0.185285	0.853006	0.957176	Ncor1	nuclear receptor co-repressor 1 [Source:MGI Symbol;Acc:MGI:1349717]
ENSMUSG00000018507	0.116264	1.28586	6.22954	0.206413	0.836469	NA	Trpv2	transient receptor potential cation channel, subfamily V, member 2 [Source:MGI Symbol;Acc:MGI:1341836]
ENSMUSG00000018509	78.9966	-2.51601	1.48048	-1.69946	0.0892328	0.354494	Cenpv	centromere protein V [Source:MGI Symbol;Acc:MGI:1920389]
ENSMUSG00000018537	2.59881	-3.37789	2.50487	-1.34853	0.177488	NA	Pcgf2	polycomb group ring finger 2 [Source:MGI Symbol;Acc:MGI:99161]
ENSMUSG00000018541	8.26486	-1.26123	1.88031	-0.670756	0.502376	0.815936	Cwc25	CWC25 spliceosome-associated protein [Source:MGI Symbol;Acc:MGI:1914730]
ENSMUSG00000018543	78.3906	-1.69341	0.48951	-3.4594	0.000541385	0.00769744	Spmap1	sperm microtubule associated protein 1 [Source:MGI Symbol;Acc:MGI:1919465]
ENSMUSG00000018547	5.58209	-0.832787	2.27399	-0.366223	0.714198	0.910493	Pip4k2b	phosphatidylinositol-5-phosphate 4-kinase, type II, beta [Source:MGI Symbol;Acc:MGI:1934234]
ENSMUSG00000018548	726.893	-0.636818	0.144294	-4.41335	1.02e-05	0.000227513	Trim37	tripartite motif-containing 37 [Source:MGI Symbol;Acc:MGI:2153072]
ENSMUSG00000018554	976.348	1.53943	0.242991	6.33532	2.37e-10	1.15e-08	Ybx2	Y box protein 2 [Source:MGI Symbol;Acc:MGI:1096372]
ENSMUSG00000018559	27.6572	2.72515	1.35348	2.01344	0.0440682	0.228435	Ctdnep1	CTD nuclear envelope phosphatase 1 [Source:MGI Symbol;Acc:MGI:1914431]
ENSMUSG00000018565	85.776	-1.43109	0.356444	-4.0149	5.95e-05	0.00112909	Elp5	elongator acetyltransferase complex subunit 5 [Source:MGI Symbol;Acc:MGI:1859017]
ENSMUSG00000018566	0.0602767	0.492897	6.21035	0.079367	0.936741	NA	Slc2a4	solute carrier family 2 (facilitated glucose transporter), member 4 [Source:MGI Symbol;Acc:MGI:95758]
ENSMUSG00000018567	251.097	0.535996	0.304829	1.75835	0.0786882	0.330372	Gabarap	gamma-aminobutyric acid receptor associated protein [Source:MGI Symbol;Acc:MGI:1861742]
ENSMUSG00000018569	0.261939	3.90993	6.21033	0.629585	0.528966	NA	Cldn7	claudin 7 [Source:MGI Symbol;Acc:MGI:1859285]
ENSMUSG00000018570	214.059	3.15322	1.6812	1.87557	0.0607137	0.282922	2810408A11Rik	RIKEN cDNA 2810408A11 gene [Source:MGI Symbol;Acc:MGI:1917669]
ENSMUSG00000018572	8.87679	0.342898	1.969	0.174148	0.861749	0.959895	Phf23	PHD finger protein 23 [Source:MGI Symbol;Acc:MGI:1925496]
ENSMUSG00000018574	17.4735	-0.726686	1.88062	-0.386408	0.699194	0.905105	Acadvl	acyl-Coenzyme A dehydrogenase, very long chain [Source:MGI Symbol;Acc:MGI:895149]
ENSMUSG00000018581	2.13545	2.52061	2.97686	0.846735	0.397143	NA	Dnah11	dynein, axonemal, heavy chain 11 [Source:MGI Symbol;Acc:MGI:1100864]
ENSMUSG00000018583	32.11	-0.472744	0.989271	-0.477871	0.632742	0.878577	G3bp1	G3BP stress granule assembly factor 1 [Source:MGI Symbol;Acc:MGI:1351465]
ENSMUSG00000018585	13.9839	-3.58855	1.77179	-2.02538	0.0428284	0.224032	Atox1	antioxidant 1 copper chaperone [Source:MGI Symbol;Acc:MGI:1333855]
ENSMUSG00000018589	0	NA	NA	NA	NA	NA	Glra2	glycine receptor, alpha 2 subunit [Source:MGI Symbol;Acc:MGI:95748]
ENSMUSG00000018593	51.6639	2.74102	1.72076	1.59291	0.11118	0.401617	Sparc	secreted acidic cysteine rich glycoprotein [Source:MGI Symbol;Acc:MGI:98373]
ENSMUSG00000018595	2.06077	3.01044	3.19668	0.941739	0.346326	NA	Glra4	glycine receptor, alpha 4 subunit [Source:MGI Symbol;Acc:MGI:95750]
ENSMUSG00000018599	4.53439	2.55639	2.82572	0.904685	0.365632	NA	Mief2	mitochondrial elongation factor 2 [Source:MGI Symbol;Acc:MGI:2144199]
ENSMUSG00000018604	0	NA	NA	NA	NA	NA	Tbx3	T-box 3 [Source:MGI Symbol;Acc:MGI:98495]
ENSMUSG00000018620	0	NA	NA	NA	NA	NA	Mmp20	matrix metallopeptidase 20 (enamelysin) [Source:MGI Symbol;Acc:MGI:1353466]
ENSMUSG00000018623	0	NA	NA	NA	NA	NA	Mmp7	matrix metallopeptidase 7 [Source:MGI Symbol;Acc:MGI:103189]
ENSMUSG00000018634	2.63653	-1.02879	3.61699	-0.284432	0.776079	NA	Crhr1	corticotropin releasing hormone receptor 1 [Source:MGI Symbol;Acc:MGI:88498]
ENSMUSG00000018648	0.583345	-1.04504	6.13247	-0.170411	0.864687	NA	Dusp14	dual specificity phosphatase 14 [Source:MGI Symbol;Acc:MGI:1927168]
ENSMUSG00000018651	3.066	-3.48933	2.15717	-1.61755	0.10576	NA	Tada2a	transcriptional adaptor 2A [Source:MGI Symbol;Acc:MGI:2144471]
ENSMUSG00000018654	0	NA	NA	NA	NA	NA	Ikzf1	IKAROS family zinc finger 1 [Source:MGI Symbol;Acc:MGI:1342540]
ENSMUSG00000018656	0	NA	NA	NA	NA	NA	Tcaf3	TRPM8 channel-associated factor 3 [Source:MGI Symbol;Acc:MGI:3042585]
ENSMUSG00000018659	1.22073	0.869722	3.75108	0.231859	0.816647	NA	Pnpo	pyridoxine 5'-phosphate oxidase [Source:MGI Symbol;Acc:MGI:2144151]
ENSMUSG00000018661	547.944	-0.609726	0.178453	-3.41672	0.000633804	0.00877397	Cog1	component of oligomeric golgi complex 1 [Source:MGI Symbol;Acc:MGI:1333873]
ENSMUSG00000018666	14.1921	-0.778028	1.16896	-0.665573	0.505684	0.816862	Cbx1	chromobox 1 [Source:MGI Symbol;Acc:MGI:105369]
ENSMUSG00000018669	76.8929	-0.0226054	1.7052	-0.0132567	0.989423	0.997216	Cdk5rap3	CDK5 regulatory subunit associated protein 3 [Source:MGI Symbol;Acc:MGI:1933126]
ENSMUSG00000018672	0.5895	-2.31312	6.13637	-0.376952	0.706209	NA	Copz2	coatomer protein complex, subunit zeta 2 [Source:MGI Symbol;Acc:MGI:1929008]
ENSMUSG00000018677	342.144	2.79559	1.68857	1.6556	0.0978032	0.371825	Slc25a39	solute carrier family 25, member 39 [Source:MGI Symbol;Acc:MGI:1196386]
ENSMUSG00000018678	6.67903	-0.00709885	1.25052	-0.00567674	0.995471	0.999096	Sp2	Sp2 transcription factor [Source:MGI Symbol;Acc:MGI:1926162]
ENSMUSG00000018697	70.6401	-0.540925	1.73714	-0.311389	0.755505	0.925713	Aatf	apoptosis antagonizing transcription factor [Source:MGI Symbol;Acc:MGI:1929608]
ENSMUSG00000018698	4.54771	2.56373	1.86476	1.37483	0.169184	NA	Lhx1	LIM homeobox protein 1 [Source:MGI Symbol;Acc:MGI:99783]
ENSMUSG00000018707	2588.52	0.166703	0.100116	1.6651	0.0958937	0.367521	Dync1h1	dynein cytoplasmic 1 heavy chain 1 [Source:MGI Symbol;Acc:MGI:103147]
ENSMUSG00000018727	11.6133	3.01912	1.34645	2.24228	0.024943	0.15577	Cpsf4l	cleavage and polyadenylation specific factor 4-like [Source:MGI Symbol;Acc:MGI:1277182]
ENSMUSG00000018733	7.0971	2.36553	1.96828	1.20182	0.229432	0.579555	Pex12	peroxisomal biogenesis factor 12 [Source:MGI Symbol;Acc:MGI:2144177]
ENSMUSG00000018736	42.618	1.42958	0.650732	2.19689	0.0280285	0.167624	Ndel1	nudE neurodevelopment protein 1 like 1 [Source:MGI Symbol;Acc:MGI:1932915]
ENSMUSG00000018740	2982.79	-0.74955	0.962156	-0.779032	0.435961	0.773445	Slc25a35	solute carrier family 25, member 35 [Source:MGI Symbol;Acc:MGI:1919248]
ENSMUSG00000018750	2.90978	-4.87571	4.00922	-1.21612	0.223937	NA	Zbtb4	zinc finger and BTB domain containing 4 [Source:MGI Symbol;Acc:MGI:1922830]
ENSMUSG00000018752	0	NA	NA	NA	NA	NA	Tnfsfm13	tumor necrosis factor (ligand) superfamily, membrane-bound member 13 [Source:MGI Symbol;Acc:MGI:3845075]
ENSMUSG00000018761	4.08479	0.185631	4.93635	0.037605	0.970003	NA	Mpdu1	mannose-P-dolichol utilization defect 1 [Source:MGI Symbol;Acc:MGI:1346040]
ENSMUSG00000018765	48.116	-0.515634	0.565303	-0.912137	0.361696	0.713721	Fxr2	FMR1 autosomal homolog 2 [Source:MGI Symbol;Acc:MGI:1346074]
ENSMUSG00000018770	13.9706	0.401318	1.89277	0.212027	0.832086	0.949936	Atp5mc3	ATP synthase membrane subunit c locus 3 [Source:MGI Symbol;Acc:MGI:2442035]
ENSMUSG00000018774	0.33203	0.729727	6.21894	0.117339	0.906591	NA	Cd68	CD68 antigen [Source:MGI Symbol;Acc:MGI:88342]
ENSMUSG00000018776	34.2942	1.78462	1.54962	1.15165	0.249465	0.603523	Slc35g3	solute carrier family 35, member G3 [Source:MGI Symbol;Acc:MGI:1927128]
ENSMUSG00000018796	646.498	2.37758	0.944927	2.51616	0.0118643	0.0912747	Acsl1	acyl-CoA synthetase long-chain family member 1 [Source:MGI Symbol;Acc:MGI:102797]
ENSMUSG00000018800	55.1838	-0.458406	0.608343	-0.753533	0.45113	0.784147	Abca5	ATP-binding cassette, sub-family A member 5 [Source:MGI Symbol;Acc:MGI:2386607]
ENSMUSG00000018809	7.98319	-0.0660701	1.44025	-0.045874	0.963411	0.986468	Smyd4	SET and MYND domain containing 4 [Source:MGI Symbol;Acc:MGI:2442796]
ENSMUSG00000018819	1.14045	1.65131	5.91465	0.27919	0.780099	NA	Lsp1	lymphocyte specific 1 [Source:MGI Symbol;Acc:MGI:96832]
ENSMUSG00000018820	11.3139	-3.32011	2.61662	-1.26886	0.204493	0.548505	Zfyve27	zinc finger, FYVE domain containing 27 [Source:MGI Symbol;Acc:MGI:1919602]
ENSMUSG00000018821	12.9455	1.3497	1.5633	0.86337	0.387934	0.735033	Avpi1	arginine vasopressin-induced 1 [Source:MGI Symbol;Acc:MGI:1916784]
ENSMUSG00000018822	6.35277	2.35861	2.22735	1.05893	0.289631	0.646505	Sfrp5	secreted frizzled-related sequence protein 5 [Source:MGI Symbol;Acc:MGI:1860298]
ENSMUSG00000018830	7.72202	1.44091	1.97631	0.729094	0.465944	0.792357	Myh11	myosin, heavy polypeptide 11, smooth muscle [Source:MGI Symbol;Acc:MGI:102643]
ENSMUSG00000018841	4.78268	-1.99277	3.22701	-0.617528	0.536886	0.837075	Rad51d	RAD51 paralog D [Source:MGI Symbol;Acc:MGI:1261809]
ENSMUSG00000018844	162.814	0.701277	0.355903	1.97042	0.0487906	0.243438	Fndc8	fibronectin type III domain containing 8 [Source:MGI Symbol;Acc:MGI:1926169]
ENSMUSG00000018845	1.69655	4.71349	5.06851	0.929957	0.352393	NA	Unc45b	unc-45 myosin chaperone B [Source:MGI Symbol;Acc:MGI:2443377]
ENSMUSG00000018846	14.7891	-2.76711	1.01672	-2.72162	0.00649633	0.0574582	Pank3	pantothenate kinase 3 [Source:MGI Symbol;Acc:MGI:2387464]
[truncated: 20,115 more rows]

## Sheet: P<0.05, |FC|>1, basemean ≥ 20
ensembl_gene_id	baseMean	log2FoldChange	lfcSE	stat	pvalue	padj	external_gene_name	description
ENSMUSG00000057176	11856.2	1.09056	0.137592	7.92604	2.26e-15	1.86e-13	Cfap119	cilia and flagella associated protein 119 [Source:MGI Symbol;Acc:MGI:2685012]
ENSMUSG00000038015	8834.94	4.27026	0.289178	14.7669	2.4e-49	1.08e-46	Prm2	protamine 2 [Source:MGI Symbol;Acc:MGI:97766]
ENSMUSG00000061923	7928.11	1.28249	0.116481	11.0103	3.41e-28	6.32e-26	Odf1	outer dense fiber of sperm tails 1 [Source:MGI Symbol;Acc:MGI:97424]
ENSMUSG00000022501	6753.27	4.11959	0.595566	6.91711	4.61e-12	2.92e-10	Prm1	protamine 1 [Source:MGI Symbol;Acc:MGI:97765]
ENSMUSG00000004071	4654.77	-1.57959	0.509117	-3.1026	0.00191827	0.0221185	Cdip1	cell death inducing Trp53 target 1 [Source:MGI Symbol;Acc:MGI:1913876]
ENSMUSG00000028141	4387.09	4.18752	0.357791	11.7038	1.22e-31	2.68e-29	Oaz3	ornithine decarboxylase antizyme 3 [Source:MGI Symbol;Acc:MGI:1858170]
ENSMUSG00000090369	3966.54	1.20236	0.118456	10.1502	3.31e-24	4.88e-22	4933411K16Rik	RIKEN cDNA 4933411K16 gene [Source:MGI Symbol;Acc:MGI:1914015]
ENSMUSG00000027227	3504.2	2.3221	0.2538	9.1493	5.73e-20	6.53e-18	Sord	sorbitol dehydrogenase [Source:MGI Symbol;Acc:MGI:98266]
ENSMUSG00000038057	3456.75	1.67992	0.129599	12.9624	2e-38	5.4e-36	Dbil5	diazepam binding inhibitor-like 5 [Source:MGI Symbol;Acc:MGI:108039]
ENSMUSG00000036199	3046.22	-1.79394	0.245834	-7.29739	2.93e-13	2.05e-11	Ndufa13	NADH:ubiquinone oxidoreductase subunit A13 [Source:MGI Symbol;Acc:MGI:1914434]
ENSMUSG00000042293	2945.62	1.88151	0.121676	15.4634	6.13e-54	3.62e-51	Gm5617	predicted gene 5617 [Source:MGI Symbol;Acc:MGI:3643566]
ENSMUSG00000002835	2791.54	-1.59599	0.155287	-10.2777	8.88e-25	1.4e-22	Chaf1a	chromatin assembly factor 1, subunit A [Source:MGI Symbol;Acc:MGI:1351331]
ENSMUSG00000048696	2711.56	2.29722	0.227066	10.117	4.64e-24	6.76e-22	Mex3d	mex3 RNA binding family member D [Source:MGI Symbol;Acc:MGI:2681847]
ENSMUSG00000067702	2582.49	-1.39062	0.0988301	-14.0708	5.74e-45	2.26e-42	Tuba3a	tubulin, alpha 3A [Source:MGI Symbol;Acc:MGI:1095406]
ENSMUSG00000044526	2501.98	1.41891	0.125712	11.2869	1.52e-29	3e-27	Znrf4	zinc and ring finger 4 [Source:MGI Symbol;Acc:MGI:1341258]
ENSMUSG00000110622	2485.86	2.13772	0.0905354	23.612	2.9e-123	2.74e-119	Iqcn	IQ motif containing N [Source:MGI Symbol;Acc:MGI:3708784]
ENSMUSG00000067338	2402.84	-1.27645	0.0907093	-14.0719	5.66e-45	2.26e-42	Tuba3b	tubulin, alpha 3B [Source:MGI Symbol;Acc:MGI:1095408]
ENSMUSG00000007033	2232.87	1.53028	0.186956	8.18524	2.72e-16	2.47e-14	Hspa1l	heat shock protein 1-like [Source:MGI Symbol;Acc:MGI:96231]
ENSMUSG00000003341	2225.51	2.71508	0.195468	13.8901	7.27e-44	2.29e-41	Atp8b3	ATPase, class I, type 8B, member 3 [Source:MGI Symbol;Acc:MGI:1914581]
ENSMUSG00000047654	2207.39	1.50056	0.180399	8.31798	8.95e-17	8.63e-15	Tssk6	testis-specific serine kinase 6 [Source:MGI Symbol;Acc:MGI:2148775]
ENSMUSG00000045004	2140.79	1.94638	0.125583	15.4987	3.54e-54	2.23e-51	Spata21	spermatogenesis associated 21 [Source:MGI Symbol;Acc:MGI:3607787]
ENSMUSG00000046957	2027.17	2.02721	0.144547	14.0246	1.1e-44	4.01e-42	Spz1	spermatogenic leucine zipper 1 [Source:MGI Symbol;Acc:MGI:1930801]
ENSMUSG00000070639	1972.98	1.89958	0.136779	13.888	7.49e-44	2.29e-41	Lrrc8b	leucine rich repeat containing 8 family, member B [Source:MGI Symbol;Acc:MGI:2141353]
ENSMUSG00000020681	1971.7	3.73416	0.206106	18.1177	2.31e-73	3.64e-70	Ace	angiotensin I converting enzyme [Source:MGI Symbol;Acc:MGI:87874]
ENSMUSG00000028287	1710.21	2.29448	0.209657	10.944	7.1e-28	1.29e-25	1700009N14Rik	RIKEN cDNA 1700009N14 gene [Source:MGI Symbol;Acc:MGI:1922721]
ENSMUSG00000020029	1646.13	2.47334	0.107088	23.0964	5.04e-118	2.38e-114	Nudt4	nudix hydrolase 4 [Source:MGI Symbol;Acc:MGI:1918457]
ENSMUSG00000066368	1576.81	1.04063	0.132301	7.86562	3.67e-15	2.92e-13	Actl11	actin-like 11 [Source:MGI Symbol;Acc:MGI:1914972]
ENSMUSG00000044468	1567.3	2.35452	0.158715	14.8349	8.72e-50	4.12e-47	Tent5c	terminal nucleotidyltransferase 5C [Source:MGI Symbol;Acc:MGI:1921895]
ENSMUSG00000020878	1504.58	-1.83998	0.1084	-16.974	1.28e-64	1.34e-61	Lrrc46	leucine rich repeat containing 46 [Source:MGI Symbol;Acc:MGI:1916547]
ENSMUSG00000071636	1496.35	1.72391	0.150284	11.471	1.85e-30	3.79e-28	Rimbp3	RIMS binding protein 3 [Source:MGI Symbol;Acc:MGI:2685449]
ENSMUSG00000045521	1493.29	1.13245	0.164213	6.89621	5.34e-12	3.28e-10	Tssk2	testis-specific serine kinase 2 [Source:MGI Symbol;Acc:MGI:1347559]
ENSMUSG00000049396	1422.15	-3.66329	0.297682	-12.3061	8.4e-35	2.15e-32	Gemin4	gem nuclear organelle associated protein 4 [Source:MGI Symbol;Acc:MGI:2449313]
ENSMUSG00000024207	1374.33	1.7025	0.16505	10.3151	6.02e-25	9.65e-23	Acsbg2	acyl-CoA synthetase bubblegum family member 2 [Source:MGI Symbol;Acc:MGI:3587728]
ENSMUSG00000002102	1344.43	-3.72338	0.177876	-20.9324	2.71e-97	6.41e-94	Psmc3	proteasome (prosome, macropain) 26S subunit, ATPase 3 [Source:MGI Symbol;Acc:MGI:1098754]
ENSMUSG00000029708	1304.9	-2.47916	0.355126	-6.98107	2.93e-12	1.91e-10	Gcc1	golgi coiled coil 1 [Source:MGI Symbol;Acc:MGI:1921625]
ENSMUSG00000050058	1297.6	1.25186	0.199043	6.28938	3.19e-10	1.49e-08	Prm3	protamine 3 [Source:MGI Symbol;Acc:MGI:106601]
ENSMUSG00000044084	1261.86	3.03771	0.217955	13.9373	3.76e-44	1.27e-41	Spem2	SPEM family member 2 [Source:MGI Symbol;Acc:MGI:1918293]
ENSMUSG00000018428	1241.39	7.18724	1.61715	4.44438	8.81e-06	0.000199385	Akap1	A kinase anchor protein 1 [Source:MGI Symbol;Acc:MGI:104729]
ENSMUSG00000044340	1230.43	1.5722	0.140772	11.1684	5.82e-29	1.12e-26	Phlpp1	PH domain and leucine rich repeat protein phosphatase 1 [Source:MGI Symbol;Acc:MGI:2138327]
ENSMUSG00000047518	1216.33	3.2196	0.19136	16.8248	1.61e-63	1.52e-60	Slfnl1	schlafen like 1 [Source:MGI Symbol;Acc:MGI:3045330]
ENSMUSG00000063129	1213.87	1.29208	0.191798	6.73666	1.62e-11	9.07e-10	Aldoart2	aldolase 1 A, retrogene 2 [Source:MGI Symbol;Acc:MGI:1931052]
ENSMUSG00000092519	1176.2	1.43096	0.152627	9.37549	6.89e-21	8.45e-19	Actl9	actin-like 9 [Source:MGI Symbol;Acc:MGI:1916731]
ENSMUSG00000032437	1173.61	1.65816	0.168364	9.8487	6.94e-23	9.65e-21	Stt3b	STT3, subunit of the oligosaccharyltransferase complex, homolog B (S. cerevisiae) [Source:MGI Symbol;Acc:MGI:1915542]
ENSMUSG00000050107	1125.2	2.18467	0.115737	18.8762	1.79e-79	3.39e-76	Haspin	histone H3 associated protein kinase [Source:MGI Symbol;Acc:MGI:1194498]
ENSMUSG00000050553	1111.09	-2.11078	0.142151	-14.8488	7.08e-50	3.52e-47	Gk2	glycerol kinase 2 [Source:MGI Symbol;Acc:MGI:1329027]
ENSMUSG00000028310	1108.45	-1.14033	0.123173	-9.25796	2.08e-20	2.46e-18	Ppp3r2	protein phosphatase 3, regulatory subunit B, alpha isoform (calcineurin B, type II) [Source:MGI Symbol;Acc:MGI:107171]
ENSMUSG00000078439	1105.47	4.3658	1.27747	3.41754	0.000631899	0.00876041	Smim24	small integral membrane protein 24 [Source:MGI Symbol;Acc:MGI:1919523]
ENSMUSG00000074817	1091.69	1.71696	0.174994	9.81153	1e-22	1.36e-20	Papolb	poly (A) polymerase beta (testis specific) [Source:MGI Symbol;Acc:MGI:1932115]
ENSMUSG00000041566	1090.74	1.66705	0.188886	8.82567	1.09e-18	1.17e-16	Tssk1	testis-specific serine kinase 1 [Source:MGI Symbol;Acc:MGI:1347557]
ENSMUSG00000074746	1038.98	1.92944	0.164425	11.7345	8.49e-32	1.91e-29	Pdzd8	PDZ domain containing 8 [Source:MGI Symbol;Acc:MGI:2677270]
ENSMUSG00000035504	1013.4	5.44992	1.67399	3.25565	0.00113131	0.0142242	Reep6	receptor accessory protein 6 [Source:MGI Symbol;Acc:MGI:1917585]
ENSMUSG00000064367	1000.49	1.02348	0.192401	5.31952	1.04e-07	3.39e-06	mt-Nd5	mitochondrially encoded NADH dehydrogenase 5 [Source:MGI Symbol;Acc:MGI:102496]
ENSMUSG00000018554	976.348	1.53943	0.242991	6.33532	2.37e-10	1.15e-08	Ybx2	Y box protein 2 [Source:MGI Symbol;Acc:MGI:1096372]
ENSMUSG00000041165	975.72	2.62498	0.15089	17.3967	8.74e-68	1.03e-64	Spem1	spermatid maturation 1 [Source:MGI Symbol;Acc:MGI:1921538]
ENSMUSG00000019578	971.36	3.44757	0.153675	22.4342	1.82e-111	5.75e-108	Ubxn6	UBX domain protein 6 [Source:MGI Symbol;Acc:MGI:1913780]
ENSMUSG00000035522	968.697	-1.35086	0.191591	-7.05077	1.78e-12	1.18e-10	Tsga8	testis specific gene A8 [Source:MGI Symbol;Acc:MGI:1194903]
ENSMUSG00000051618	965.372	1.27449	0.18594	6.85429	7.17e-12	4.32e-10	Ubqln3	ubiquilin 3 [Source:MGI Symbol;Acc:MGI:3045291]
ENSMUSG00000051166	964.263	-3.4798	1.10419	-3.15146	0.00162459	0.0193457	Eml5	echinoderm microtubule associated protein like 5 [Source:MGI Symbol;Acc:MGI:2442513]
ENSMUSG00000062028	952.964	2.18107	0.291187	7.49029	6.87e-14	5.12e-12	Irgc	immunity related GTPase cinema [Source:MGI Symbol;Acc:MGI:2685948]
ENSMUSG00000043060	952.649	1.39466	0.175747	7.93559	2.09e-15	1.74e-13	Fscb	fibrous sheath CABYR binding protein [Source:MGI Symbol;Acc:MGI:3646964]
ENSMUSG00000030189	950.879	2.69031	0.31122	8.64439	5.41e-18	5.56e-16	Ybx3	Y box protein 3 [Source:MGI Symbol;Acc:MGI:2137670]
ENSMUSG00000028458	948.629	2.70953	0.174431	15.5335	2.06e-54	1.39e-51	Tesk1	testis specific protein kinase 1 [Source:MGI Symbol;Acc:MGI:1201675]
ENSMUSG00000027679	941.565	-3.69962	1.29279	-2.86174	0.00421325	0.0407324	Dnajc19	DnaJ heat shock protein family (Hsp40) member C19 [Source:MGI Symbol;Acc:MGI:1914963]
ENSMUSG00000022155	940.308	2.15818	0.141542	15.2476	1.71e-52	8.97e-50	Mroh2b	maestro heat-like repeat family member 2B [Source:MGI Symbol;Acc:MGI:1921905]
ENSMUSG00000051437	932.41	2.45881	0.17664	13.9199	4.8e-44	1.56e-41	Ubqlnl	ubiquilin-like [Source:MGI Symbol;Acc:MGI:2685336]
ENSMUSG00000029828	904.558	1.51487	0.16378	9.24938	2.26e-20	2.64e-18	Spmip4	sperm microtubule inner protein 4 [Source:MGI Symbol;Acc:MGI:1918071]
ENSMUSG00000033319	900.411	2.56032	0.155476	16.4676	6.27e-61	5.39e-58	Fem1c	fem 1 homolog c [Source:MGI Symbol;Acc:MGI:2444737]
ENSMUSG00000038520	887.056	1.09733	0.375241	2.92434	0.00345188	0.0345737	Tbc1d17	TBC1 domain family, member 17 [Source:MGI Symbol;Acc:MGI:2449973]
ENSMUSG00000031545	883.187	1.22173	0.189554	6.44528	1.15e-10	5.8e-09	Gpat4	glycerol-3-phosphate acyltransferase 4 [Source:MGI Symbol;Acc:MGI:2142716]
ENSMUSG00000031518	879.419	1.19488	0.195607	6.10857	1.01e-09	4.44e-08	Spata4	spermatogenesis associated 4 [Source:MGI Symbol;Acc:MGI:1916531]
ENSMUSG00000100937	871.1	-1.79383	0.167662	-10.6991	1.03e-26	1.74e-24	Nscme3l	NSE3 homolog, SMC5-SMC6 complex component like [Source:MGI Symbol;Acc:MGI:1922805]
ENSMUSG00000037075	845.895	1.67067	0.177799	9.39635	5.65e-21	7.03e-19	Rnf139	ring finger protein 139 [Source:MGI Symbol;Acc:MGI:1923091]
ENSMUSG00000074435	842.686	2.9614	0.763031	3.88111	0.000103983	0.00185501	Smcp	sperm mitochondria-associated cysteine-rich protein [Source:MGI Symbol;Acc:MGI:96945]
ENSMUSG00000032101	840.809	-1.50273	0.13046	-11.5187	1.06e-30	2.23e-28	Ddx25	DEAD box helicase 25 [Source:MGI Symbol;Acc:MGI:1353582]
ENSMUSG00000035295	825.605	3.0294	0.409669	7.39474	1.42e-13	1.02e-11	Wdr38	WD repeat domain 38 [Source:MGI Symbol;Acc:MGI:1923896]
ENSMUSG00000050799	822.157	-1.16155	0.183548	-6.32835	2.48e-10	1.19e-08	H2bc1	H2B clustered histone 1 [Source:MGI Symbol;Acc:MGI:2448375]
ENSMUSG00000030738	810.047	-1.37046	0.158516	-8.64557	5.35e-18	5.56e-16	Eif3c	eukaryotic translation initiation factor 3, subunit C [Source:MGI Symbol;Acc:MGI:1926966]
ENSMUSG00000029707	800.513	3.15081	0.391886	8.04011	8.98e-16	7.65e-14	Fscn3	fascin actin-bundling protein 3 [Source:MGI Symbol;Acc:MGI:1890386]
ENSMUSG00000024973	789.374	2.48074	0.359386	6.90271	5.1e-12	3.17e-10	Plaat5	phospholipase A and acyltransferase 5 [Source:MGI Symbol;Acc:MGI:1913977]
ENSMUSG00000030206	776.747	3.00443	0.784598	3.82926	0.000128527	0.00220548	Gsg1	germ cell associated 1 [Source:MGI Symbol;Acc:MGI:1194499]
ENSMUSG00000000411	752.247	1.83818	0.190509	9.64878	4.97e-22	6.62e-20	Tssk3	testis-specific serine kinase 3 [Source:MGI Symbol;Acc:MGI:1929914]
ENSMUSG00000099398	748.276	2.21534	0.141411	15.666	2.58e-55	2.04e-52	Ms4a14	membrane-spanning 4-domains, subfamily A, member 14 [Source:MGI Symbol;Acc:MGI:2686122]
ENSMUSG00000015599	736.752	3.69089	0.350621	10.5267	6.51e-26	1.06e-23	Ttbk1	tau tubulin kinase 1 [Source:MGI Symbol;Acc:MGI:2147036]
ENSMUSG00000064351	730.382	2.44091	0.263582	9.26055	2.03e-20	2.43e-18	mt-Co1	mitochondrially encoded cytochrome c oxidase I [Source:MGI Symbol;Acc:MGI:102504]
ENSMUSG00000021257	728.198	-1.49887	0.139936	-10.7111	9.03e-27	1.55e-24	Angel1	angel homolog 1 [Source:MGI Symbol;Acc:MGI:1915987]
ENSMUSG00000032412	721.35	1.47266	0.281107	5.2388	1.62e-07	5.09e-06	Atp1b3	ATPase, Na+/K+ transporting, beta 3 polypeptide [Source:MGI Symbol;Acc:MGI:107788]
ENSMUSG00000016018	718.956	-1.89218	0.17036	-11.107	1.16e-28	2.19e-26	Mtrex	Mtr4 exosome RNA helicase [Source:MGI Symbol;Acc:MGI:1919448]
ENSMUSG00000027823	713.113	-2.20344	0.141428	-15.58	9.96e-55	7.24e-52	Gmps	guanine monophosphate synthetase [Source:MGI Symbol;Acc:MGI:2448526]
ENSMUSG00000022039	711.077	-1.36311	0.200674	-6.79268	1.1e-11	6.38e-10	Adam2	a disintegrin and metallopeptidase domain 2 [Source:MGI Symbol;Acc:MGI:1340894]
ENSMUSG00000046173	708.295	-1.49786	0.141421	-10.5915	3.26e-26	5.41e-24	Pabpc6	poly(A) binding protein, cytoplasmic 6 [Source:MGI Symbol;Acc:MGI:1914793]
ENSMUSG00000044362	706.551	-1.50712	0.193562	-7.78625	6.9e-15	5.39e-13	Ccdc89	coiled-coil domain containing 89 [Source:MGI Symbol;Acc:MGI:1917304]
ENSMUSG00000109864	706.049	-1.1046	0.174943	-6.31407	2.72e-10	1.3e-08	Eid3	EP300 interacting inhibitor of differentiation 3 [Source:MGI Symbol;Acc:MGI:1913591]
ENSMUSG00000035051	689.843	-2.02134	0.604848	-3.34189	0.000832087	0.0110652	Dhx57	DExH-box helicase 57 [Source:MGI Symbol;Acc:MGI:2147067]
ENSMUSG00000031898	687.562	-1.25052	0.151048	-8.27896	1.24e-16	1.19e-14	Dpep3	dipeptidase 3 [Source:MGI Symbol;Acc:MGI:1919104]
ENSMUSG00000073730	687.237	2.92321	0.228352	12.8013	1.61e-37	4.23e-35	Ppp1r14bl	protein phosphatase 1, regulatory inhibitor subunit 14B like [Source:MGI Symbol;Acc:MGI:1914005]
ENSMUSG00000034239	673.908	-1.01657	0.199771	-5.08867	3.61e-07	1.07e-05	Lrrc37	leucine rich repeat containing 37 [Source:MGI Symbol;Acc:MGI:2685730]
ENSMUSG00000047619	656.285	1.99539	0.169922	11.7429	7.68e-32	1.77e-29	Ddi1	DNA-damage inducible 1 [Source:MGI Symbol;Acc:MGI:1919079]
ENSMUSG00000034854	642.041	2.22828	0.40185	5.54507	2.94e-08	1.07e-06	Mfsd12	major facilitator superfamily domain containing 12 [Source:MGI Symbol;Acc:MGI:3604804]
ENSMUSG00000046826	639.298	1.00795	0.342054	2.94676	0.0032112	0.0330021	Fam187b	family with sequence similarity 187, member B [Source:MGI Symbol;Acc:MGI:1923665]
ENSMUSG00000003345	632.307	3.16889	0.595189	5.32418	1.01e-07	3.32e-06	Csnk1g2	casein kinase 1, gamma 2 [Source:MGI Symbol;Acc:MGI:1920014]
ENSMUSG00000003814	628.167	-1.03445	0.26832	-3.85527	0.000115604	0.00203167	Calr	calreticulin [Source:MGI Symbol;Acc:MGI:88252]
ENSMUSG00000047720	623.357	1.59506	0.157721	10.1131	4.83e-24	6.92e-22	Clec2m	C-type lectin domain family 2, member m [Source:MGI Symbol;Acc:MGI:2685920]
ENSMUSG00000032110	618.476	-2.48025	0.280178	-8.85241	8.57e-19	9.42e-17	Acrv1	acrosomal vesicle protein 1 [Source:MGI Symbol;Acc:MGI:104590]
ENSMUSG00000051728	607.904	1.7557	0.351528	4.9945	5.9e-07	1.67e-05	Fam243	family with sequence similarity 243 [Source:MGI Symbol;Acc:MGI:1922578]
ENSMUSG00000041716	607.737	-4.91222	1.27304	-3.85865	0.000114015	0.00201497	Gm20604	predicted gene 20604 [Source:MGI Symbol;Acc:MGI:5305180]
ENSMUSG00000001829	604.574	4.4562	0.773883	5.75824	8.5e-09	3.35e-07	Clpb	ClpB caseinolytic peptidase B [Source:MGI Symbol;Acc:MGI:1100517]
ENSMUSG00000041809	603.13	-1.26009	0.264152	-4.77032	1.84e-06	4.9e-05	Efhc1	EF-hand domain (C-terminal) containing 1 [Source:MGI Symbol;Acc:MGI:1919127]
ENSMUSG00000042744	600.06	1.07882	0.145762	7.4013	1.35e-13	9.81e-12	Hectd4	HECT domain E3 ubiquitin protein ligase 4 [Source:MGI Symbol;Acc:MGI:3647820]
ENSMUSG00000049506	593.296	2.50912	0.350466	7.15937	8.1e-13	5.55e-11	Sppl2c	signal peptide peptidase 2C [Source:MGI Symbol;Acc:MGI:3045264]
ENSMUSG00000109737	591.951	1.8692	0.184112	10.1525	3.23e-24	4.85e-22	Spem3	SPEM family member 3 [Source:MGI Symbol;Acc:MGI:5622451]
ENSMUSG00000041399	590.579	2.24166	0.190786	11.7496	7.1e-32	1.68e-29	1700013G24Rik	RIKEN cDNA 1700013G24 gene [Source:MGI Symbol;Acc:MGI:1916630]
ENSMUSG00000021097	585.372	5.21982	0.970392	5.37908	7.49e-08	2.55e-06	Clmn	calmin [Source:MGI Symbol;Acc:MGI:2136957]
ENSMUSG00000056509	581.672	5.65978	1.47387	3.84008	0.000122994	0.00212987	Misfa	mitochondrial sheath formation associated [Source:MGI Symbol;Acc:MGI:3642801]
ENSMUSG00000020719	581.44	-2.34106	0.755067	-3.10047	0.00193212	0.0221971	Ddx5	DEAD box helicase 5 [Source:MGI Symbol;Acc:MGI:105037]
ENSMUSG00000032489	581.242	-1.71237	0.245921	-6.9631	3.33e-12	2.16e-10	Kif9	kinesin family member 9 [Source:MGI Symbol;Acc:MGI:1098237]
ENSMUSG00000020593	567.79	6.27269	1.639	3.82715	0.000129636	0.00221647	Lpin1	lipin 1 [Source:MGI Symbol;Acc:MGI:1891340]
ENSMUSG00000004070	565.277	2.29115	0.403566	5.67725	1.37e-08	5.24e-07	Hmox2	heme oxygenase 2 [Source:MGI Symbol;Acc:MGI:109373]
ENSMUSG00000037979	547.632	2.67477	0.18526	14.4379	2.99e-47	1.28e-44	Ccdc92	coiled-coil domain containing 92 [Source:MGI Symbol;Acc:MGI:106485]
ENSMUSG00000050612	547.511	1.09011	0.363709	2.9972	0.00272472	0.0291098	Txndc2	thioredoxin domain containing 2 (spermatozoa) [Source:MGI Symbol;Acc:MGI:2389312]
ENSMUSG00000030030	544.786	4.11777	1.36101	3.02553	0.00248196	0.0269735	1700003E16Rik	RIKEN cDNA 1700003E16 gene [Source:MGI Symbol;Acc:MGI:1919087]
ENSMUSG00000059920	530.202	1.58413	0.366629	4.32079	1.55e-05	0.000331434	4930453N24Rik	RIKEN cDNA 4930453N24 gene [Source:MGI Symbol;Acc:MGI:1914859]
ENSMUSG00000049792	526.145	1.32635	0.241883	5.48345	4.17e-08	1.46e-06	Bag5	BCL2-associated athanogene 5 [Source:MGI Symbol;Acc:MGI:1917619]
ENSMUSG00000110170	525.916	3.19207	0.471961	6.76343	1.35e-11	7.68e-10	St6galnac2	ST6 (alpha-N-acetyl-neuraminyl-2,3-beta-galactosyl-1,3)-N-acetylgalactosaminide alpha-2,6-sialyltransferase 2 [Source:MGI Symbol;Acc:MGI:107553]
ENSMUSG00000047025	523.441	1.16343	0.174658	6.66118	2.72e-11	1.47e-09	Ccer1	coiled-coil glutamate-rich protein 1 [Source:MGI Symbol;Acc:MGI:1913966]
ENSMUSG00000022432	519.948	-1.37832	0.204259	-6.74791	1.5e-11	8.44e-10	Smc1b	structural maintenance of chromosomes 1B [Source:MGI Symbol;Acc:MGI:2154049]
ENSMUSG00000038485	506.14	4.99152	1.68145	2.96858	0.00299177	0.0312789	Socs7	suppressor of cytokine signaling 7 [Source:MGI Symbol;Acc:MGI:2651588]
ENSMUSG00000028789	502.911	4.7275	1.69282	2.79268	0.00522732	0.0483604	Azin2	antizyme inhibitor 2 [Source:MGI Symbol;Acc:MGI:2442093]
ENSMUSG00000032244	502.201	2.26242	0.330642	6.84252	7.78e-12	4.6e-10	Fem1b	fem 1 homolog b [Source:MGI Symbol;Acc:MGI:1335087]
ENSMUSG00000027702	502.013	-1.96703	0.191505	-10.2714	9.48e-25	1.47e-22	Lrrc34	leucine rich repeat containing 34 [Source:MGI Symbol;Acc:MGI:1919077]
ENSMUSG00000028572	499.746	4.58492	1.47063	3.11765	0.00182298	0.0212793	Hook1	hook microtubule tethering protein 1 [Source:MGI Symbol;Acc:MGI:1925213]
ENSMUSG00000020462	498.71	-1.43429	0.269379	-5.32443	1.01e-07	3.32e-06	Cfap36	cilia and flagella associated protein 36 [Source:MGI Symbol;Acc:MGI:1913994]
ENSMUSG00000080152	497.203	-1.46572	0.247212	-5.929	3.05e-09	1.28e-07	H3f4	H3.4 histone, cluster member [Source:MGI Symbol;Acc:MGI:3651326]
ENSMUSG00000043319	491.51	-1.72186	0.217441	-7.91874	2.4e-15	1.96e-13	Cox8c	cytochrome c oxidase subunit 8C [Source:MGI Symbol;Acc:MGI:1922733]
ENSMUSG00000004535	489.509	-1.1019	0.159544	-6.90658	4.96e-12	3.11e-10	Tax1bp1	Tax1 (human T cell leukemia virus type I) binding protein 1 [Source:MGI Symbol;Acc:MGI:1289308]
ENSMUSG00000075227	485.764	1.18117	0.354275	3.33405	0.000855916	0.0113343	Znhit2	zinc finger, HIT domain containing 2 [Source:MGI Symbol;Acc:MGI:1352481]
ENSMUSG00000026578	484.842	1.15666	0.153329	7.54363	4.57e-14	3.46e-12	Ccdc181	coiled-coil domain containing 181 [Source:MGI Symbol;Acc:MGI:1922145]
ENSMUSG00000033799	476.891	-1.21907	0.207591	-5.87246	4.29e-09	1.76e-07	Tasor2	transcription activation suppressor family member 2 [Source:MGI Symbol;Acc:MGI:2145274]
ENSMUSG00000048206	470.767	1.87909	0.423566	4.43635	9.15e-06	0.000205431	Dnajb8	DnaJ heat shock protein family (Hsp40) member B8 [Source:MGI Symbol;Acc:MGI:1922801]
ENSMUSG00000037278	467.243	-1.54474	0.242737	-6.36386	1.97e-10	9.74e-09	Tmem97	transmembrane protein 97 [Source:MGI Symbol;Acc:MGI:1916321]
ENSMUSG00000038398	465.82	1.57999	0.249632	6.3293	2.46e-10	1.19e-08	Upf3a	UPF3 regulator of nonsense transcripts homolog A (yeast) [Source:MGI Symbol;Acc:MGI:1914281]
ENSMUSG00000030968	462.264	-1.30864	0.283511	-4.61582	3.92e-06	9.59e-05	Pdilt	protein disulfide isomerase-like, testis expressed [Source:MGI Symbol;Acc:MGI:1919080]
ENSMUSG00000037885	460.501	1.73252	0.206767	8.37908	5.33e-17	5.25e-15	Stk35	serine/threonine kinase 35 [Source:MGI Symbol;Acc:MGI:1914583]
ENSMUSG00000030077	456.082	6.56488	1.36361	4.81433	1.48e-06	4.02e-05	Chl1	cell adhesion molecule L1-like [Source:MGI Symbol;Acc:MGI:1098266]
ENSMUSG00000091311	450.177	1.09903	0.161897	6.78848	1.13e-11	6.53e-10	Spata31d1b	spermatogenesis associated 31 subfamily D, member 1B [Source:MGI Symbol;Acc:MGI:3646080]
ENSMUSG00000034075	449.935	1.68948	0.284208	5.94453	2.77e-09	1.17e-07	Zdhhc5	zinc finger, DHHC domain containing 5 [Source:MGI Symbol;Acc:MGI:1923573]
ENSMUSG00000076433	448.365	1.35725	0.309867	4.38011	1.19e-05	0.00025842	Cep295nl	CEP295 N-terminal like [Source:MGI Symbol;Acc:MGI:1929713]
ENSMUSG00000042644	447.368	-1.41743	0.487184	-2.90944	0.00362077	0.0359228	Itpr3	inositol 1,4,5-triphosphate receptor 3 [Source:MGI Symbol;Acc:MGI:96624]
ENSMUSG00000001175	447.247	-4.57797	1.47139	-3.11134	0.00186243	0.0216393	Calm1	calmodulin 1 [Source:MGI Symbol;Acc:MGI:88251]
ENSMUSG00000092305	446.316	-1.94105	0.202211	-9.59914	8.06e-22	1.04e-19	Prps1l1	phosphoribosyl pyrophosphate synthetase 1-like 1 [Source:MGI Symbol;Acc:MGI:1922706]
ENSMUSG00000003123	446.016	3.16797	0.383737	8.25557	1.51e-16	1.42e-14	Lipe	lipase, hormone sensitive [Source:MGI Symbol;Acc:MGI:96790]
ENSMUSG00000026894	444.195	-1.89336	0.209673	-9.03005	1.72e-19	1.93e-17	Morn5	MORN repeat containing 5 [Source:MGI Symbol;Acc:MGI:1922745]
ENSMUSG00000033794	441.071	2.32695	0.241974	9.6165	6.81e-22	8.94e-20	Lpcat2b	lysophosphatidylcholine acyltransferase 2B [Source:MGI Symbol;Acc:MGI:1918152]
ENSMUSG00000009628	440.211	-1.86667	0.361333	-5.16608	2.39e-07	7.31e-06	Tex15	testis expressed gene 15 [Source:MGI Symbol;Acc:MGI:1934816]
ENSMUSG00000020849	439.085	-1.53111	0.231612	-6.61066	3.83e-11	2.04e-09	Ywhae	tyrosine 3-monooxygenase/tryptophan 5-monooxygenase activation protein, epsilon polypeptide [Source:MGI Symbol;Acc:MGI:894689]
ENSMUSG00000032514	422.059	1.74409	0.260805	6.68734	2.27e-11	1.24e-09	Ttc21a	tetratricopeptide repeat domain 21A [Source:MGI Symbol;Acc:MGI:1921302]
ENSMUSG00000026083	413.795	-2.40902	0.181205	-13.2945	2.49e-40	7.14e-38	Eif5b	eukaryotic translation initiation factor 5B [Source:MGI Symbol;Acc:MGI:2441772]
ENSMUSG00000045328	405.89	-1.33467	0.256328	-5.20688	1.92e-07	5.95e-06	Cenpe	centromere protein E [Source:MGI Symbol;Acc:MGI:1098230]
ENSMUSG00000036822	404.936	-1.34794	0.241542	-5.58058	2.4e-08	8.89e-07	Topors	topoisomerase I binding, arginine/serine-rich [Source:MGI Symbol;Acc:MGI:2146189]
ENSMUSG00000038997	404.706	2.63001	0.45154	5.82453	5.73e-09	2.3e-07	Asb17	ankyrin repeat and SOCS box-containing 17 [Source:MGI Symbol;Acc:MGI:1914022]
ENSMUSG00000020571	398.154	-1.5345	0.318773	-4.81378	1.48e-06	4.02e-05	Pdia6	protein disulfide isomerase associated 6 [Source:MGI Symbol;Acc:MGI:1919103]
ENSMUSG00000056508	397.96	1.69057	0.229961	7.35152	1.96e-13	1.39e-11	1700001K19Rik	RIKEN cDNA 1700001K19 gene [Source:MGI Symbol;Acc:MGI:1913573]
ENSMUSG00000027927	395.963	3.30623	0.3469	9.53079	1.56e-21	1.99e-19	Lelp1	late cornified envelope-like proline-rich 1 [Source:MGI Symbol;Acc:MGI:1916582]
ENSMUSG00000047502	394.801	1.91582	0.24585	7.79263	6.56e-15	5.17e-13	Mroh7	maestro heat-like repeat family member 7 [Source:MGI Symbol;Acc:MGI:2685873]
ENSMUSG00000032010	393.121	1.66682	0.217222	7.67336	1.68e-14	1.28e-12	Usp2	ubiquitin specific peptidase 2 [Source:MGI Symbol;Acc:MGI:1858178]
ENSMUSG00000043429	392.88	1.28497	0.194835	6.59518	4.25e-11	2.24e-09	Ccdc185	coiled-coil domain containing 185 [Source:MGI Symbol;Acc:MGI:3618292]
ENSMUSG00000067199	391.763	2.7627	0.239798	11.5209	1.03e-30	2.22e-28	Frat1	frequently rearranged in advanced T cell lymphomas [Source:MGI Symbol;Acc:MGI:109450]
ENSMUSG00000026622	390.392	-1.17829	0.164928	-7.14426	9.05e-13	6.11e-11	Nek2	NIMA (never in mitosis gene a)-related expressed kinase 2 [Source:MGI Symbol;Acc:MGI:109359]
ENSMUSG00000003660	390.267	-1.03084	0.239752	-4.2996	1.71e-05	0.000361123	Snrnp200	small nuclear ribonucleoprotein 200 (U5) [Source:MGI Symbol;Acc:MGI:2444401]
ENSMUSG00000041009	389.305	1.4474	0.445471	3.24914	0.00115754	0.0145153	Iqcf4	IQ motif containing F4 [Source:MGI Symbol;Acc:MGI:1914570]
ENSMUSG00000047104	389.07	-1.39405	0.225501	-6.182	6.33e-10	2.91e-08	Pbp2	phosphatidylethanolamine binding protein 2 [Source:MGI Symbol;Acc:MGI:1923650]
ENSMUSG00000037149	387.625	-1.14006	0.213505	-5.33972	9.31e-08	3.1e-06	Ddx1	DEAD box helicase 1 [Source:MGI Symbol;Acc:MGI:2144727]
ENSMUSG00000026546	387.21	-1.6137	0.251046	-6.42791	1.29e-10	6.44e-09	Cfap45	cilia and flagella associated protein 45 [Source:MGI Symbol;Acc:MGI:1919120]
ENSMUSG00000050035	381.857	3.02917	0.266577	11.3632	6.38e-30	1.28e-27	Fhl4	four and a half LIM domains 4 [Source:MGI Symbol;Acc:MGI:1338765]
ENSMUSG00000057265	381.655	-1.64525	0.313869	-5.24183	1.59e-07	5.06e-06	Bbof1	basal body orientation factor 1 [Source:MGI Symbol;Acc:MGI:1920123]
ENSMUSG00000074771	379.917	3.65297	0.949134	3.84874	0.000118725	0.00207494	Ankef1	ankyrin repeat and EF-hand domain containing 1 [Source:MGI Symbol;Acc:MGI:2441685]
ENSMUSG00000046192	376.806	-1.48404	0.182889	-8.11444	4.88e-16	4.31e-14	Iqub	IQ motif and ubiquitin domain containing [Source:MGI Symbol;Acc:MGI:3041159]
ENSMUSG00000023988	373.758	2.40819	0.404749	5.94983	2.68e-09	1.14e-07	Bysl	bystin-like [Source:MGI Symbol;Acc:MGI:1858419]
ENSMUSG00000049539	373.315	-1.97803	0.213894	-9.24772	2.29e-20	2.64e-18	H1f1	H1.1 linker histone, cluster member [Source:MGI Symbol;Acc:MGI:1931523]
ENSMUSG00000031849	372.349	2.26896	0.207912	10.913	9.99e-28	1.75e-25	Comp	cartilage oligomeric matrix protein [Source:MGI Symbol;Acc:MGI:88469]
ENSMUSG00000003354	364.765	-1.29763	0.255902	-5.07082	3.96e-07	1.17e-05	Ccdc65	coiled-coil domain containing 65 [Source:MGI Symbol;Acc:MGI:2146001]
ENSMUSG00000073102	362.498	-1.22315	0.204901	-5.96944	2.38e-09	1.02e-07	Drc1	dynein regulatory complex subunit 1 [Source:MGI Symbol;Acc:MGI:2685906]
ENSMUSG00000072647	362.019	1.86432	0.263781	7.06767	1.58e-12	1.06e-10	Adam1a	a disintegrin and metallopeptidase domain 1a [Source:MGI Symbol;Acc:MGI:2429504]
ENSMUSG00000002228	360.423	1.45087	0.271734	5.33931	9.33e-08	3.1e-06	Ppm1j	protein phosphatase 1J [Source:MGI Symbol;Acc:MGI:1919137]
ENSMUSG00000027968	357.791	-1.0686	0.211109	-5.06186	4.15e-07	1.22e-05	Larp7	La ribonucleoprotein 7, transcriptional regulator [Source:MGI Symbol;Acc:MGI:107634]
ENSMUSG00000049354	356.952	-1.06129	0.291304	-3.64323	0.000269236	0.00418001	Dcaf7	DDB1 and CUL4 associated factor 7 [Source:MGI Symbol;Acc:MGI:1919083]
ENSMUSG00000002319	356.144	5.20031	1.39776	3.72046	0.000198858	0.00319762	Ipo4	importin 4 [Source:MGI Symbol;Acc:MGI:1923001]
ENSMUSG00000005417	355.529	2.64528	0.326977	8.09011	5.96e-16	5.12e-14	Mprip	myosin phosphatase Rho interacting protein [Source:MGI Symbol;Acc:MGI:1349438]
ENSMUSG00000091415	353.415	-1.37499	0.221756	-6.20047	5.63e-10	2.6e-08	Ak9	adenylate kinase 9 [Source:MGI Symbol;Acc:MGI:2685080]
ENSMUSG00000014503	352.724	-1.9911	0.295063	-6.74805	1.5e-11	8.44e-10	Pkd2l2	polycystic kidney disease 2-like 2 [Source:MGI Symbol;Acc:MGI:1858231]
ENSMUSG00000040852	352.703	2.74236	0.179649	15.2651	1.31e-52	7.26e-50	Plekhh2	pleckstrin homology domain containing, family H (with MyTH4 domain) member 2 [Source:MGI Symbol;Acc:MGI:2146813]
ENSMUSG00000036598	349.756	-1.40607	0.228305	-6.15873	7.33e-10	3.32e-08	Ccdc113	coiled-coil domain containing 113 [Source:MGI Symbol;Acc:MGI:3606076]
ENSMUSG00000049106	349.142	1.93433	0.306999	6.30076	2.96e-10	1.41e-08	Dcaf5	DDB1 and CUL4 associated factor 5 [Source:MGI Symbol;Acc:MGI:2444785]
ENSMUSG00000037001	343.643	-1.43988	0.186985	-7.70052	1.36e-14	1.04e-12	Zfp39	zinc finger protein 39 [Source:MGI Symbol;Acc:MGI:99183]
ENSMUSG00000024429	343.413	1.37361	0.155632	8.82601	1.08e-18	1.17e-16	Gnl1	guanine nucleotide binding protein-like 1 [Source:MGI Symbol;Acc:MGI:95764]
ENSMUSG00000026807	339.444	-1.51501	0.274572	-5.51771	3.43e-08	1.22e-06	Ak8	adenylate kinase 8 [Source:MGI Symbol;Acc:MGI:1916120]
ENSMUSG00000060260	336.557	4.72512	1.67794	2.81602	0.0048623	0.0457899	Pwwp2b	PWWP domain containing 2B [Source:MGI Symbol;Acc:MGI:2142008]
ENSMUSG00000117477	336.056	1.88119	0.279578	6.72869	1.71e-11	9.52e-10	Gm50092	predicted gene, 50092 [Source:MGI Symbol;Acc:MGI:6275428]
ENSMUSG00000074582	330.628	1.28165	0.26605	4.81732	1.46e-06	3.98e-05	Arfgef2	ADP ribosylation factor guanine nucleotide exchange factor 2 [Source:MGI Symbol;Acc:MGI:2139354]
ENSMUSG00000033237	329.055	1.23978	0.209174	5.92703	3.08e-09	1.29e-07	Arid2	AT-rich interaction domain 2 [Source:MGI Symbol;Acc:MGI:1924294]
ENSMUSG00000021374	328.7	1.73171	0.213301	8.11862	4.72e-16	4.21e-14	Nup153	nucleoporin 153 [Source:MGI Symbol;Acc:MGI:2385621]
ENSMUSG00000032058	324.295	1.0165	0.215601	4.71473	2.42e-06	6.22e-05	Ppp2r1b	protein phosphatase 2, regulatory subunit A, beta [Source:MGI Symbol;Acc:MGI:1920949]
ENSMUSG00000037708	322.96	-1.41263	0.248158	-5.69245	1.25e-08	4.83e-07	Spag6	sperm associated antigen 6 [Source:MGI Symbol;Acc:MGI:3040687]
ENSMUSG00000026679	322.229	-1.93348	0.230476	-8.38907	4.9e-17	4.88e-15	Enkur	enkurin, TRPC channel interacting protein [Source:MGI Symbol;Acc:MGI:1918483]
ENSMUSG00000022037	320.229	1.60931	0.535673	3.00428	0.00266206	0.028602	Clu	clusterin [Source:MGI Symbol;Acc:MGI:88423]
ENSMUSG00000029883	318.678	4.40344	1.36634	3.2228	0.00126945	0.0157309	Prss59	serine protease 59 [Source:MGI Symbol;Acc:MGI:1920731]
ENSMUSG00000058709	315.822	2.6702	0.725872	3.67861	0.00023451	0.00369548	Egln2	egl-9 family hypoxia-inducible factor 2 [Source:MGI Symbol;Acc:MGI:1932287]
ENSMUSG00000030319	315.235	-1.1316	0.386518	-2.92768	0.003415	0.034423	Cand2	cullin associated and neddylation dissociated 2 (putative) [Source:MGI Symbol;Acc:MGI:1914338]
ENSMUSG00000026125	315.223	2.02092	0.1849	10.9298	8.3e-28	1.48e-25	Prss39	serine protease 39 [Source:MGI Symbol;Acc:MGI:1270856]
ENSMUSG00000053293	315.099	2.22818	0.274892	8.10565	5.25e-16	4.55e-14	Pom121	nuclear pore membrane protein 121 [Source:MGI Symbol;Acc:MGI:2137624]
ENSMUSG00000040489	312.871	2.72888	0.195368	13.9679	2.45e-44	8.58e-42	Sox30	SRY (sex determining region Y)-box 30 [Source:MGI Symbol;Acc:MGI:1341157]
ENSMUSG00000036463	312.105	-1.65892	0.271009	-6.12129	9.28e-10	4.14e-08	4930544G11Rik	RIKEN cDNA 4930544G11 gene [Source:MGI Symbol;Acc:MGI:1914903]
ENSMUSG00000046229	310.598	2.04683	0.238364	8.587	8.93e-18	9.08e-16	Scand1	SCAN domain-containing 1 [Source:MGI Symbol;Acc:MGI:1343132]
ENSMUSG00000024359	308.695	-1.45479	0.258526	-5.62725	1.83e-08	6.9e-07	Hspa9	heat shock protein 9 [Source:MGI Symbol;Acc:MGI:96245]
ENSMUSG00000055681	307.49	-2.30132	0.327648	-7.02376	2.16e-12	1.43e-10	Cope	coatomer protein complex, subunit epsilon [Source:MGI Symbol;Acc:MGI:1891702]
ENSMUSG00000090100	307.019	1.39211	0.475698	2.92646	0.00342847	0.0344853	Ttbk2	tau tubulin kinase 2 [Source:MGI Symbol;Acc:MGI:2155779]
ENSMUSG00000026576	306.3	4.77848	0.533939	8.94948	3.57e-19	3.97e-17	Atp1b1	ATPase, Na+/K+ transporting, beta 1 polypeptide [Source:MGI Symbol;Acc:MGI:88108]
ENSMUSG00000008429	300.867	2.37651	0.509309	4.66613	3.07e-06	7.72e-05	Herpud2	HERPUD family member 2 [Source:MGI Symbol;Acc:MGI:1915393]
ENSMUSG00000041629	297.203	2.09196	0.302371	6.91852	4.56e-12	2.92e-10	Vcf1	VCP nuclear cofactor family member 1 [Source:MGI Symbol;Acc:MGI:106351]
ENSMUSG00000023175	294.505	4.35243	1.32951	3.2737	0.00106149	0.0135444	Bsg	basigin [Source:MGI Symbol;Acc:MGI:88208]
ENSMUSG00000035696	288.374	4.90756	1.03281	4.75168	2.02e-06	5.27e-05	Rnf38	ring finger protein 38 [Source:MGI Symbol;Acc:MGI:1920719]
ENSMUSG00000049897	285.337	-1.13458	0.280834	-4.04004	5.34e-05	0.00103333	Stkld1	serine/threonine kinase-like domain containing 1 [Source:MGI Symbol;Acc:MGI:2685557]
ENSMUSG00000050114	284.793	1.48918	0.257534	5.78246	7.36e-09	2.92e-07	Prdx6b	peroxiredoxin 6B [Source:MGI Symbol;Acc:MGI:1336888]
ENSMUSG00000030161	280.162	2.70528	0.460509	5.87456	4.24e-09	1.74e-07	Gabarapl1	GABA type A receptor associated protein like 1 [Source:MGI Symbol;Acc:MGI:1914980]
ENSMUSG00000062438	279.432	-1.23511	0.275155	-4.48876	7.16e-06	0.000165609	Adam1b	a disintegrin and metallopeptidase domain 1b [Source:MGI Symbol;Acc:MGI:2429506]
ENSMUSG00000039158	278.957	1.14977	0.206516	5.56746	2.58e-08	9.55e-07	Akna	AT-hook transcription factor [Source:MGI Symbol;Acc:MGI:2140340]
ENSMUSG00000020401	278.629	1.25969	0.192098	6.55751	5.47e-11	2.87e-09	Garin3	golgi associated RAB2 interactor 3 [Source:MGI Symbol;Acc:MGI:3650836]
ENSMUSG00000033306	278.481	3.10089	0.489805	6.33087	2.44e-10	1.18e-08	Lpp	LIM domain containing preferred translocation partner in lipoma [Source:MGI Symbol;Acc:MGI:2441849]
ENSMUSG00000078442	278.09	-1.14613	0.312236	-3.67071	0.000241879	0.00379895	Tektl1	tektin like 1 [Source:MGI Symbol;Acc:MGI:1918226]
ENSMUSG00000032306	276.872	-1.15205	0.212782	-5.41424	6.16e-08	2.12e-06	Mpi	mannose phosphate isomerase [Source:MGI Symbol;Acc:MGI:97075]
ENSMUSG00000025982	276.588	-1.5367	0.279706	-5.49399	3.93e-08	1.38e-06	Sf3b1	splicing factor 3b, subunit 1 [Source:MGI Symbol;Acc:MGI:1932339]
ENSMUSG00000027562	276.453	2.69788	0.365667	7.37796	1.61e-13	1.15e-11	Car2	carbonic anhydrase 2 [Source:MGI Symbol;Acc:MGI:88269]
ENSMUSG00000040152	274.664	2.41552	0.561925	4.29865	1.72e-05	0.000361857	Thbs1	thrombospondin 1 [Source:MGI Symbol;Acc:MGI:98737]
ENSMUSG00000038987	271.102	-1.39518	0.335446	-4.15918	3.19e-05	0.000643904	Cfap157	cilia and flagella associated protein 157 [Source:MGI Symbol;Acc:MGI:2447809]
ENSMUSG00000079652	269.699	5.17658	1.68521	3.07177	0.00212794	0.0240359	Garin1a	golgi associated RAB2 interactor 1A [Source:MGI Symbol;Acc:MGI:2141439]
ENSMUSG00000032601	268.181	1.84971	0.522233	3.54191	0.000397234	0.00587769	Prkar2a	protein kinase, cAMP dependent regulatory, type II alpha [Source:MGI Symbol;Acc:MGI:108025]
ENSMUSG00000045248	267.265	1.25152	0.236442	5.29313	1.2e-07	3.88e-06	Med26	mediator complex subunit 26 [Source:MGI Symbol;Acc:MGI:1917875]
ENSMUSG00000001211	265.85	3.24665	0.437114	7.42746	1.11e-13	8.11e-12	Agpat3	1-acylglycerol-3-phosphate O-acyltransferase 3 [Source:MGI Symbol;Acc:MGI:1336186]
ENSMUSG00000069237	264.875	3.96333	0.281982	14.0552	7.15e-45	2.71e-42	Fam8a1	family with sequence similarity 8, member A1 [Source:MGI Symbol;Acc:MGI:2145496]
ENSMUSG00000095040	260.476	-1.46011	0.388896	-3.75451	0.000173681	0.00285097	1700001J03Rik	RIKEN cDNA 1700001J03 gene [Source:MGI Symbol;Acc:MGI:1916532]
ENSMUSG00000021086	259.528	-1.53708	0.373044	-4.12037	3.78e-05	0.000749783	Ccdc175	coiled-coil domain containing 175 [Source:MGI Symbol;Acc:MGI:1921186]
ENSMUSG00000109179	255.182	-1.48022	0.362545	-4.08286	4.45e-05	0.000872616	Wdr97	WD repeat domain 97 [Source:MGI Symbol;Acc:MGI:5594498]
ENSMUSG00000022680	250.885	2.07821	0.69484	2.99091	0.00278143	0.0295157	Pdxdc1	pyridoxal-dependent decarboxylase domain containing 1 [Source:MGI Symbol;Acc:MGI:1920909]
ENSMUSG00000028706	250.183	4.88167	0.824244	5.9226	3.17e-09	1.32e-07	Nsun4	NOL1/NOP2/Sun domain family, member 4 [Source:MGI Symbol;Acc:MGI:1919431]
ENSMUSG00000027465	250.176	5.21719	1.70324	3.06309	0.00219064	0.02457	Tbc1d20	TBC1 domain family, member 20 [Source:MGI Symbol;Acc:MGI:1914481]
ENSMUSG00000062017	248.862	-1.16741	0.261638	-4.46193	8.12e-06	0.000185507	Abca14	ATP-binding cassette, sub-family A member 14 [Source:MGI Symbol;Acc:MGI:2388708]
ENSMUSG00000020307	248.531	1.66751	0.543883	3.06594	0.00216985	0.0243947	Cdc34	cell division cycle 34 [Source:MGI Symbol;Acc:MGI:102657]
ENSMUSG00000025410	247.216	1.14565	0.275318	4.16118	3.17e-05	0.000639632	Dctn2	dynactin 2 [Source:MGI Symbol;Acc:MGI:107733]
ENSMUSG00000032285	246.98	2.14845	0.511343	4.20158	2.65e-05	0.000542441	Dnaja4	DnaJ heat shock protein family (Hsp40) member A4 [Source:MGI Symbol;Acc:MGI:1927638]
ENSMUSG00000040699	246.925	2.50178	0.245404	10.1945	2.1e-24	3.2e-22	Limd2	LIM domain containing 2 [Source:MGI Symbol;Acc:MGI:1915053]
ENSMUSG00000052738	244.669	-2.08616	0.442386	-4.7157	2.41e-06	6.22e-05	Suclg1	succinate-CoA ligase, GDP-forming, alpha subunit [Source:MGI Symbol;Acc:MGI:1927234]
ENSMUSG00000044320	243.817	2.78774	0.381778	7.30201	2.83e-13	2e-11	1700001O22Rik	RIKEN cDNA 1700001O22 gene [Source:MGI Symbol;Acc:MGI:1923631]
ENSMUSG00000018425	243.78	-1.59577	0.240039	-6.64797	2.97e-11	1.6e-09	Dhx40	DEAH-box helicase 40 [Source:MGI Symbol;Acc:MGI:1914737]
ENSMUSG00000031776	241.904	2.49035	0.360056	6.91657	4.63e-12	2.92e-10	Arl2bp	ADP-ribosylation factor-like 2 binding protein [Source:MGI Symbol;Acc:MGI:1349429]
ENSMUSG00000070883	241.392	-1.38133	0.341095	-4.0497	5.13e-05	0.000995649	Cfap210	cilia and flagella associated protein 210 [Source:MGI Symbol;Acc:MGI:1923100]
ENSMUSG00000044787	240.93	3.96851	0.324195	12.2411	1.87e-34	4.66e-32	Spata32	spermatogenesis associated 32 [Source:MGI Symbol;Acc:MGI:3045340]
ENSMUSG00000062604	239.355	3.05222	0.376438	8.10817	5.14e-16	4.5e-14	Srpk2	serine/arginine-rich protein specific kinase 2 [Source:MGI Symbol;Acc:MGI:1201408]
ENSMUSG00000040859	238.007	2.18144	0.26055	8.37242	5.64e-17	5.5e-15	Bsdc1	BSD domain containing 1 [Source:MGI Symbol;Acc:MGI:1913466]
ENSMUSG00000040105	237.326	3.96166	0.22598	17.531	8.31e-69	1.12e-65	Plpp6	phospholipid phosphatase 6 [Source:MGI Symbol;Acc:MGI:1921661]
ENSMUSG00000042797	236.988	4.94942	1.68534	2.93674	0.00331677	0.0337684	Aqp11	aquaporin 11 [Source:MGI Symbol;Acc:MGI:1913583]
ENSMUSG00000024925	236.919	-2.15367	0.469272	-4.58938	4.45e-06	0.000107328	Rnaseh2c	ribonuclease H2, subunit C [Source:MGI Symbol;Acc:MGI:1915459]
ENSMUSG00000052299	235.969	1.54017	0.32253	4.77527	1.79e-06	4.79e-05	Ltn1	listerin E3 ubiquitin protein ligase 1 [Source:MGI Symbol;Acc:MGI:1926163]
ENSMUSG00000022783	235.493	-1.68322	0.352172	-4.77955	1.76e-06	4.72e-05	Spag6l	sperm associated antigen 6-like [Source:MGI Symbol;Acc:MGI:1354388]
ENSMUSG00000006299	235.333	1.82656	0.587847	3.10721	0.00188862	0.0218835	Aamp	angio-associated migratory protein [Source:MGI Symbol;Acc:MGI:107809]
ENSMUSG00000027601	234.945	4.51768	1.47735	3.05797	0.00222843	0.0248173	Mtfr1	mitochondrial fission regulator 1 [Source:MGI Symbol;Acc:MGI:1914722]
ENSMUSG00000039202	231.88	1.12707	0.283301	3.97834	6.94e-05	0.00129419	Abhd2	abhydrolase domain containing 2 [Source:MGI Symbol;Acc:MGI:1914344]
ENSMUSG00000038932	231.253	1.60804	0.239849	6.7044	2.02e-11	1.11e-09	Tcfl5	transcription factor-like 5 (basic helix-loop-helix) [Source:MGI Symbol;Acc:MGI:2672878]
ENSMUSG00000030695	231.209	3.27852	0.585571	5.59884	2.16e-08	8.03e-07	Aldoa	aldolase A, fructose-bisphosphate [Source:MGI Symbol;Acc:MGI:87994]
ENSMUSG00000032218	230.926	-1.57317	0.259246	-6.06826	1.29e-09	5.63e-08	Ccnb2	cyclin B2 [Source:MGI Symbol;Acc:MGI:88311]
ENSMUSG00000047388	229.594	1.28398	0.223872	5.73532	9.73e-09	3.8e-07	Atmin	ATM interactor [Source:MGI Symbol;Acc:MGI:2682328]
ENSMUSG00000033053	228.468	-2.00131	0.420899	-4.75485	1.99e-06	5.22e-05	Cfap95	cilia and flagella associated protein 95 [Source:MGI Symbol;Acc:MGI:1914733]
ENSMUSG00000042606	228.231	-1.23474	0.293166	-4.21176	2.53e-05	0.000521969	Hirip3	HIRA interacting protein 3 [Source:MGI Symbol;Acc:MGI:2142364]
ENSMUSG00000012126	227.921	2.80215	0.505386	5.54457	2.95e-08	1.07e-06	Ubxn11	UBX domain protein 11 [Source:MGI Symbol;Acc:MGI:1914836]
ENSMUSG00000019494	227.379	1.3211	0.331264	3.98807	6.66e-05	0.00125045	Cops6	COP9 signalosome subunit 6 [Source:MGI Symbol;Acc:MGI:1349439]
ENSMUSG00000022889	226.27	-1.60783	0.35023	-4.59078	4.42e-06	0.00010707	Mrpl39	mitochondrial ribosomal protein L39 [Source:MGI Symbol;Acc:MGI:1351620]
ENSMUSG00000024729	225.063	2.17529	0.315411	6.89667	5.32e-12	3.28e-10	Ms4a20	membrane-spanning 4-domains, subfamily A, member 20 [Source:MGI Symbol;Acc:MGI:1916619]
ENSMUSG00000025500	224.508	1.52699	0.277215	5.50834	3.62e-08	1.28e-06	Lmntd2	lamin tail domain containing 2 [Source:MGI Symbol;Acc:MGI:1919250]
ENSMUSG00000041673	223.239	2.49955	0.356769	7.00609	2.45e-12	1.61e-10	Lrrc18	leucine rich repeat containing 18 [Source:MGI Symbol;Acc:MGI:1914830]
ENSMUSG00000031696	222.869	-1.2288	0.229408	-5.3564	8.49e-08	2.85e-06	Vps35	VPS35 retromer complex component [Source:MGI Symbol;Acc:MGI:1890467]
ENSMUSG00000060445	222.378	-1.76027	0.419375	-4.19736	2.7e-05	0.000551457	Sycp2	synaptonemal complex protein 2 [Source:MGI Symbol;Acc:MGI:1933281]
ENSMUSG00000031786	218.597	-1.14345	0.305473	-3.74321	0.000181686	0.0029567	Drc7	dynein regulatory complex subunit 7 [Source:MGI Symbol;Acc:MGI:2685616]
ENSMUSG00000033739	218.117	1.66292	0.267051	6.22697	4.76e-10	2.2e-08	Fkbpl	FK506 binding protein-like [Source:MGI Symbol;Acc:MGI:1932127]
ENSMUSG00000031847	217.749	1.26037	0.278646	4.52321	6.09e-06	0.000144335	1700030J22Rik	RIKEN cDNA 1700030J22 gene [Source:MGI Symbol;Acc:MGI:1916778]
ENSMUSG00000028757	216.556	-1.02391	0.232916	-4.39606	1.1e-05	0.000242951	Ddost	dolichyl-di-phosphooligosaccharide-protein glycotransferase [Source:MGI Symbol;Acc:MGI:1194508]
ENSMUSG00000022768	215.613	-2.15048	0.354817	-6.06082	1.35e-09	5.87e-08	Ccdc116	coiled-coil domain containing 116 [Source:MGI Symbol;Acc:MGI:1924122]
ENSMUSG00000064225	214.392	2.44047	0.356528	6.8451	7.64e-12	4.57e-10	Paqr9	progestin and adipoQ receptor family member IX [Source:MGI Symbol;Acc:MGI:1922802]
ENSMUSG00000025171	213.458	1.86196	0.403	4.62025	3.83e-06	9.41e-05	Ubtd1	ubiquitin domain containing 1 [Source:MGI Symbol;Acc:MGI:2385092]
ENSMUSG00000043252	213.279	3.12723	0.229767	13.6104	3.47e-42	1.03e-39	Tmem64	transmembrane protein 64 [Source:MGI Symbol;Acc:MGI:2140359]
ENSMUSG00000020198	211.366	1.65482	0.330903	5.00092	5.71e-07	1.63e-05	Ap3d1	adaptor-related protein complex 3, delta 1 subunit [Source:MGI Symbol;Acc:MGI:107734]
ENSMUSG00000052296	211.112	1.71036	0.210251	8.13484	4.12e-16	3.71e-14	Ppp6r1	protein phosphatase 6, regulatory subunit 1 [Source:MGI Symbol;Acc:MGI:2442163]
ENSMUSG00000039164	210.768	1.2628	0.316656	3.98792	6.67e-05	0.00125045	Naif1	nuclear apoptosis inducing factor 1 [Source:MGI Symbol;Acc:MGI:1918504]
ENSMUSG00000013091	210.747	-1.396	0.470293	-2.96836	0.00299391	0.0312789	Tmem190	transmembrane protein 190 [Source:MGI Symbol;Acc:MGI:1925302]
ENSMUSG00000039523	210.733	2.48402	0.312433	7.95055	1.86e-15	1.55e-13	Cep104	centrosomal protein 104 [Source:MGI Symbol;Acc:MGI:2687282]
ENSMUSG00000032594	210.676	1.73602	0.303197	5.72571	1.03e-08	4.01e-07	Ip6k1	inositol hexaphosphate kinase 1 [Source:MGI Symbol;Acc:MGI:1351633]
ENSMUSG00000032869	210.094	5.06006	1.56914	3.22474	0.00126087	0.015645	Psmf1	proteasome (prosome, macropain) inhibitor subunit 1 [Source:MGI Symbol;Acc:MGI:1346072]
ENSMUSG00000020317	206.075	3.29894	0.713457	4.62388	3.77e-06	9.3e-05	Spmap2	sperm microtubule associated protein 2 [Source:MGI Symbol;Acc:MGI:1338756]
ENSMUSG00000000439	205.405	3.99722	0.763933	5.23243	1.67e-07	5.24e-06	Mkrn2	makorin, ring finger protein, 2 [Source:MGI Symbol;Acc:MGI:1914277]
ENSMUSG00000057286	203.565	2.90286	0.352683	8.23079	1.86e-16	1.71e-14	St6galnac2	ST6 (alpha-N-acetyl-neuraminyl-2,3-beta-galactosyl-1,3)-N-acetylgalactosaminide alpha-2,6-sialyltransferase 2 [Source:MGI Symbol;Acc:MGI:107553]
ENSMUSG00000074749	202.423	1.25121	0.207853	6.01971	1.75e-09	7.54e-08	Kiz	kizuna centrosomal protein [Source:MGI Symbol;Acc:MGI:2684960]
ENSMUSG00000024966	202.027	-1.83526	0.284268	-6.4561	1.07e-10	5.43e-09	Stip1	stress-induced phosphoprotein 1 [Source:MGI Symbol;Acc:MGI:109130]
ENSMUSG00000042200	201.995	2.7287	0.292159	9.33976	9.66e-21	1.17e-18	Cdrt4	CMT1A duplicated region transcript 4 [Source:MGI Symbol;Acc:MGI:1913588]
ENSMUSG00000038298	198.703	3.01329	0.684181	4.40422	1.06e-05	0.000235731	Pdzk1	PDZ domain containing 1 [Source:MGI Symbol;Acc:MGI:1928901]
ENSMUSG00000047417	198.414	3.63099	0.302006	12.0229	2.69e-33	6.53e-31	Rexo1	REX1, RNA exonuclease 1 [Source:MGI Symbol;Acc:MGI:1914182]
ENSMUSG00000025963	198.125	-1.75423	0.254803	-6.88466	5.79e-12	3.51e-10	Mdh1b	malate dehydrogenase 1B, NAD (soluble) [Source:MGI Symbol;Acc:MGI:1923918]
ENSMUSG00000023118	196.647	4.34427	1.48249	2.93039	0.00338541	0.0341977	Sympk	symplekin [Source:MGI Symbol;Acc:MGI:1915438]
ENSMUSG00000046861	196.633	-4.48777	0.798433	-5.62072	1.9e-08	7.13e-07	Hectd3	HECT domain E3 ubiquitin protein ligase 3 [Source:MGI Symbol;Acc:MGI:1923858]
ENSMUSG00000020213	195.87	-1.30428	0.381957	-3.41474	0.000638423	0.00882498	Glipr1l1	GLI pathogenesis-related 1 like 1 [Source:MGI Symbol;Acc:MGI:1916536]
ENSMUSG00000008393	194.447	2.44272	0.248715	9.82137	9.11e-23	1.25e-20	Carhsp1	calcium regulated heat stable protein 1 [Source:MGI Symbol;Acc:MGI:1196368]
ENSMUSG00000036918	194.034	4.82551	1.7098	2.82227	0.00476851	0.0450863	Ttc7	tetratricopeptide repeat domain 7 [Source:MGI Symbol;Acc:MGI:1920999]
ENSMUSG00000035933	193.951	-1.65047	0.305575	-5.40121	6.62e-08	2.28e-06	Cog5	component of oligomeric golgi complex 5 [Source:MGI Symbol;Acc:MGI:2145130]
ENSMUSG00000023931	193.891	-2.49621	0.757064	-3.29722	0.000976455	0.0126298	Efhb	EF hand domain family, member B [Source:MGI Symbol;Acc:MGI:3045296]
ENSMUSG00000021983	193.497	1.4036	0.275371	5.09713	3.45e-07	1.03e-05	Atp8a2	ATPase, aminophospholipid transporter-like, class I, type 8A, member 2 [Source:MGI Symbol;Acc:MGI:1354710]
ENSMUSG00000058626	192.945	-1.55118	0.243849	-6.36125	2e-10	9.85e-09	Capn11	calpain 11 [Source:MGI Symbol;Acc:MGI:1352490]
ENSMUSG00000070388	192.59	1.34906	0.252953	5.33325	9.65e-08	3.18e-06	Fbxo39	F-box protein 39 [Source:MGI Symbol;Acc:MGI:3505735]
ENSMUSG00000001517	192.123	1.87996	0.288803	6.50951	7.54e-11	3.9e-09	Foxm1	forkhead box M1 [Source:MGI Symbol;Acc:MGI:1347487]
ENSMUSG00000007892	192.041	2.46816	0.550722	4.48168	7.41e-06	0.000170788	Rplp1	ribosomal protein lateral stalk subunit P1 [Source:MGI Symbol;Acc:MGI:1927099]
ENSMUSG00000028383	191.765	2.21425	0.726856	3.04634	0.00231649	0.025557	Hsdl2	hydroxysteroid dehydrogenase like 2 [Source:MGI Symbol;Acc:MGI:1919729]
ENSMUSG00000031787	191.61	1.90053	0.260877	7.28516	3.21e-13	2.23e-11	Katnb1	katanin p80 (WD40-containing) subunit B 1 [Source:MGI Symbol;Acc:MGI:1921437]
ENSMUSG00000025428	189.879	-2.30832	0.670894	-3.44066	0.000580296	0.0081405	Atp5f1a	ATP synthase F1 subunit alpha [Source:MGI Symbol;Acc:MGI:88115]
ENSMUSG00000043633	189.125	1.17146	0.33215	3.52689	0.000420469	0.00620208	Fam221b	family with sequence similarity 221, member B [Source:MGI Symbol;Acc:MGI:2441678]
ENSMUSG00000020020	188.96	1.15949	0.333159	3.48029	0.000500876	0.00718529	Usp44	ubiquitin specific peptidase 44 [Source:MGI Symbol;Acc:MGI:3045318]
ENSMUSG00000064370	188.862	2.15612	0.315506	6.83383	8.27e-12	4.86e-10	mt-Cytb	mitochondrially encoded cytochrome b [Source:MGI Symbol;Acc:MGI:102501]
ENSMUSG00000038335	187.932	-1.5991	0.39909	-4.00686	6.15e-05	0.00116356	Tsr1	TSR1 20S rRNA accumulation [Source:MGI Symbol;Acc:MGI:2144566]
ENSMUSG00000027030	185.633	2.48976	0.840459	2.96238	0.00305269	0.0317877	Stk39	serine/threonine kinase 39 [Source:MGI Symbol;Acc:MGI:1858416]
ENSMUSG00000030059	185.045	2.17657	0.572221	3.80372	0.000142541	0.00239382	Tmf1	TATA element modulatory factor 1 [Source:MGI Symbol;Acc:MGI:2684999]
ENSMUSG00000041161	184.92	2.01358	0.230408	8.73919	2.35e-18	2.47e-16	Otud3	OTU domain containing 3 [Source:MGI Symbol;Acc:MGI:1920412]
ENSMUSG00000048578	183.541	1.1974	0.24134	4.96147	7e-07	1.97e-05	Mlec	malectin [Source:MGI Symbol;Acc:MGI:1924015]
ENSMUSG00000030750	182.747	-1.49523	0.244556	-6.11406	9.71e-10	4.31e-08	Nsmce1	NSE1 homolog, SMC5-SMC6 complex component [Source:MGI Symbol;Acc:MGI:1914961]
ENSMUSG00000066324	181.851	1.02875	0.236667	4.34684	1.38e-05	0.000298827	Bpnt2	3'(2'), 5'-bisphosphate nucleotidase 2 [Source:MGI Symbol;Acc:MGI:1915720]
ENSMUSG00000029345	181.662	-1.52	0.473743	-3.2085	0.0013343	0.0163842	Tfip11	tuftelin interacting protein 11 [Source:MGI Symbol;Acc:MGI:1930075]
ENSMUSG00000000365	180.573	-1.59189	0.445477	-3.57345	0.000352307	0.0052958	Rnf17	ring finger protein 17 [Source:MGI Symbol;Acc:MGI:1353419]
ENSMUSG00000000125	179.196	1.8014	0.550691	3.27116	0.00107107	0.0136299	Wnt3	wingless-type MMTV integration site family, member 3 [Source:MGI Symbol;Acc:MGI:98955]
ENSMUSG00000084234	177.896	-2.39283	0.29009	-8.2486	1.6e-16	1.49e-14	4933405O20Rik	RIKEN cDNA 4933405O20 gene [Source:MGI Symbol;Acc:MGI:2142174]
ENSMUSG00000030224	177.82	1.20425	0.335671	3.58759	0.000333743	0.00505696	Strap	serine/threonine kinase receptor associated protein [Source:MGI Symbol;Acc:MGI:1329037]
ENSMUSG00000022270	177.788	1.12482	0.396554	2.83649	0.0045613	0.0434311	Retreg1	reticulophagy regulator 1 [Source:MGI Symbol;Acc:MGI:1913520]
ENSMUSG00000039099	176.219	-1.16109	0.314816	-3.68816	0.000225885	0.00357147	Wdr93	WD repeat domain 93 [Source:MGI Symbol;Acc:MGI:3646885]
ENSMUSG00000000594	175.73	2.12161	0.274651	7.72475	1.12e-14	8.69e-13	Gm2a	GM2 ganglioside activator protein [Source:MGI Symbol;Acc:MGI:95762]
ENSMUSG00000054117	174.939	2.87456	0.446066	6.44425	1.16e-10	5.81e-09	Zdhhc25	zinc finger, DHHC domain containing 25 [Source:MGI Symbol;Acc:MGI:1917323]
ENSMUSG00000025218	174.7	1.05039	0.337046	3.11645	0.0018304	0.0213396	Poll	polymerase (DNA directed), lambda [Source:MGI Symbol;Acc:MGI:1889000]
ENSMUSG00000062939	174.606	2.30826	0.52012	4.43794	9.08e-06	0.000204467	Stat4	signal transducer and activator of transcription 4 [Source:MGI Symbol;Acc:MGI:103062]
ENSMUSG00000030747	173.606	1.07503	0.248718	4.32227	1.54e-05	0.000331096	Dgat2	diacylglycerol O-acyltransferase 2 [Source:MGI Symbol;Acc:MGI:1915050]
ENSMUSG00000025616	173.604	1.52764	0.352078	4.33892	1.43e-05	0.000309084	Usp16	ubiquitin specific peptidase 16 [Source:MGI Symbol;Acc:MGI:1921362]
ENSMUSG00000071076	171.335	2.33663	0.727588	3.21148	0.00132053	0.0162769	Jund	jun D proto-oncogene [Source:MGI Symbol;Acc:MGI:96648]
ENSMUSG00000050957	171.017	-1.24347	0.267429	-4.64972	3.32e-06	8.27e-05	Insl6	insulin-like 6 [Source:MGI Symbol;Acc:MGI:1351595]
ENSMUSG00000031913	170.978	1.5261	0.337555	4.52103	6.15e-06	0.000145402	Vps4a	vacuolar protein sorting 4A [Source:MGI Symbol;Acc:MGI:1890520]
ENSMUSG00000040407	170.124	-1.07534	0.321395	-3.34586	0.000820269	0.0109388	Akap9	A kinase anchor protein 9 [Source:MGI Symbol;Acc:MGI:2178217]
ENSMUSG00000021786	169.8	-1.70753	0.476235	-3.58548	0.000336459	0.00507371	Oxsm	3-oxoacyl-ACP synthase, mitochondrial [Source:MGI Symbol;Acc:MGI:1918397]
ENSMUSG00000021390	169.553	-4.13962	1.26143	-3.28168	0.00103192	0.0132746	Ogn	osteoglycin [Source:MGI Symbol;Acc:MGI:109278]
ENSMUSG00000022656	169.537	1.33273	0.276564	4.81887	1.44e-06	3.96e-05	Nectin3	nectin cell adhesion molecule 3 [Source:MGI Symbol;Acc:MGI:1930171]
ENSMUSG00000025231	169.396	1.86781	0.470306	3.97148	7.14e-05	0.00132683	Sufu	SUFU negative regulator of hedgehog signaling [Source:MGI Symbol;Acc:MGI:1345643]
ENSMUSG00000060098	168.47	-1.09975	0.295377	-3.7232	0.000196713	0.00316851	Prmt7	protein arginine N-methyltransferase 7 [Source:MGI Symbol;Acc:MGI:2384879]
ENSMUSG00000021096	167.988	3.44717	1.16387	2.96182	0.00305823	0.031801	Ppm1a	protein phosphatase 1A, magnesium dependent, alpha isoform [Source:MGI Symbol;Acc:MGI:99878]
ENSMUSG00000061322	166.752	-1.07435	0.245021	-4.38471	1.16e-05	0.000253608	Dnai1	dynein axonemal intermediate chain 1 [Source:MGI Symbol;Acc:MGI:1916172]
ENSMUSG00000070738	166.687	1.75548	0.522994	3.35659	0.000789096	0.0105979	Dgkd	diacylglycerol kinase, delta [Source:MGI Symbol;Acc:MGI:2138334]
ENSMUSG00000038462	165.186	-1.91526	0.355024	-5.39475	6.86e-08	2.35e-06	Uqcrfs1	ubiquinol-cytochrome c reductase, Rieske iron-sulfur polypeptide 1 [Source:MGI Symbol;Acc:MGI:1913944]
ENSMUSG00000052906	163.866	1.49199	0.377256	3.95484	7.66e-05	0.0014006	Ubxn8	UBX domain protein 8 [Source:MGI Symbol;Acc:MGI:1337129]
ENSMUSG00000071890	163.842	-1.85608	0.453838	-4.08974	4.32e-05	0.000850652	Mroh9	maestro heat-like repeat family member 9 [Source:MGI Symbol;Acc:MGI:1925508]
ENSMUSG00000027649	163.612	-1.79954	0.378366	-4.75609	1.97e-06	5.2e-05	Ctnnbl1	catenin, beta like 1 [Source:MGI Symbol;Acc:MGI:1913892]
ENSMUSG00000034341	162.959	-1.03106	0.351734	-2.93137	0.00337467	0.0341257	Wbp2	WW domain binding protein 2 [Source:MGI Symbol;Acc:MGI:104709]
ENSMUSG00000059395	162.307	-1.15913	0.392252	-2.95506	0.00312604	0.0323056	Nkapl	NFKB activating protein-like [Source:MGI Symbol;Acc:MGI:1913957]
ENSMUSG00000071686	162.03	1.2106	0.390387	3.10102	0.00192857	0.0221833	Tex13a	testis expressed 13A [Source:MGI Symbol;Acc:MGI:1915194]
ENSMUSG00000027431	161.069	1.19654	0.230347	5.19454	2.05e-07	6.32e-06	Scp2d1	SCP2 sterol-binding domain containing 1 [Source:MGI Symbol;Acc:MGI:1913578]
ENSMUSG00000024116	158.88	-1.7478	0.316314	-5.52552	3.29e-08	1.17e-06	Prss21	serine protease 21 [Source:MGI Symbol;Acc:MGI:1916698]
ENSMUSG00000022455	158.257	1.1285	0.253784	4.4467	8.72e-06	0.000197717	Wbp2nl	WBP2 N-terminal like [Source:MGI Symbol;Acc:MGI:1921966]
ENSMUSG00000024975	157.508	-6.09553	1.30585	-4.66787	3.04e-06	7.67e-05	Pdcd4	programmed cell death 4 [Source:MGI Symbol;Acc:MGI:107490]
ENSMUSG00000063971	156.941	-1.60518	0.321302	-4.99585	5.86e-07	1.67e-05	Krt88	keratin 88 [Source:MGI Symbol;Acc:MGI:1913572]
ENSMUSG00000050555	156.681	1.47403	0.265118	5.55991	2.7e-08	9.93e-07	Hyls1	HYLS1, centriolar and ciliogenesis associated [Source:MGI Symbol;Acc:MGI:1924082]
ENSMUSG00000026532	156.441	2.41003	0.383421	6.2856	3.27e-10	1.52e-08	Spta1	spectrin alpha, erythrocytic 1 [Source:MGI Symbol;Acc:MGI:98385]
ENSMUSG00000025139	155.228	1.01925	0.344921	2.95503	0.00312635	0.0323056	Tollip	toll interacting protein [Source:MGI Symbol;Acc:MGI:1891808]
ENSMUSG00000074576	153.612	1.01521	0.312718	3.2464	0.00116874	0.014617	Mocs3	molybdenum cofactor synthesis 3 [Source:MGI Symbol;Acc:MGI:1916622]
ENSMUSG00000038042	153.016	1.48829	0.261493	5.6915	1.26e-08	4.84e-07	Ptpdc1	protein tyrosine phosphatase domain containing 1 [Source:MGI Symbol;Acc:MGI:2145430]
ENSMUSG00000031930	152.753	2.0392	0.607036	3.35928	0.000781471	0.0105505	Wwp2	WW domain containing E3 ubiquitin protein ligase 2 [Source:MGI Symbol;Acc:MGI:1914144]
ENSMUSG00000022805	152.721	-1.28597	0.401335	-3.20424	0.0013542	0.016564	Cfap91	cilia and flagella associated protein 91 [Source:MGI Symbol;Acc:MGI:2443598]
ENSMUSG00000020986	152.612	3.79405	1.30334	2.91103	0.00360235	0.0357776	Sec23a	SEC23 homolog A, COPII coat complex component [Source:MGI Symbol;Acc:MGI:1349635]
ENSMUSG00000095276	151.758	4.97933	1.71713	2.89981	0.00373392	0.0368905	Gfy	golgi-associated olfactory signaling regulator [Source:MGI Symbol;Acc:MGI:2685427]
ENSMUSG00000026750	151.65	-2.53631	0.386967	-6.55433	5.59e-11	2.92e-09	Psmb7	proteasome (prosome, macropain) subunit, beta type 7 [Source:MGI Symbol;Acc:MGI:107637]
ENSMUSG00000041408	151.141	-1.25921	0.365255	-3.44748	0.000565846	0.00799713	Wapl	WAPL cohesin release factor [Source:MGI Symbol;Acc:MGI:2675859]
ENSMUSG00000036432	151.079	3.21111	0.341497	9.40306	5.3e-21	6.68e-19	Siah2	siah E3 ubiquitin protein ligase 2 [Source:MGI Symbol;Acc:MGI:108062]
ENSMUSG00000030722	151.006	-1.89723	0.439586	-4.31594	1.59e-05	0.000337671	Nfatc2ip	nuclear factor of activated T cells, cytoplasmic, calcineurin dependent 2 interacting protein [Source:MGI Symbol;Acc:MGI:1329015]
ENSMUSG00000022972	150.937	-1.22237	0.397668	-3.07386	0.0021131	0.023995	Cfap298	cilia and flagella associate protien 298 [Source:MGI Symbol;Acc:MGI:1915251]
ENSMUSG00000034258	150.275	1.51098	0.279027	5.41519	6.12e-08	2.12e-06	Flvcr2	feline leukemia virus subgroup C cellular receptor 2 [Source:MGI Symbol;Acc:MGI:2384974]
ENSMUSG00000020075	150.065	-1.32158	0.248711	-5.31372	1.07e-07	3.49e-06	Ddx21	DExD box helicase 21 [Source:MGI Symbol;Acc:MGI:1860494]
ENSMUSG00000050592	149.162	3.5153	0.268977	13.0691	4.94e-39	1.37e-36	Fam78a	family with sequence similarity 78, member A [Source:MGI Symbol;Acc:MGI:2443569]
ENSMUSG00000030403	149.107	2.16624	0.274349	7.8959	2.88e-15	2.33e-13	Vasp	vasodilator-stimulated phosphoprotein [Source:MGI Symbol;Acc:MGI:109268]
ENSMUSG00000029310	148.241	1.51972	0.341113	4.45517	8.38e-06	0.000190525	Nudt9	nudix hydrolase 9 [Source:MGI Symbol;Acc:MGI:1921417]
ENSMUSG00000117975	147.65	1.22591	0.330894	3.70485	0.000211515	0.00337246	Itprip	inositol 1,4,5-triphosphate receptor interacting protein [Source:MGI Symbol;Acc:MGI:3042776]
ENSMUSG00000013584	147.262	-1.43234	0.267397	-5.3566	8.48e-08	2.85e-06	Aldh1a2	aldehyde dehydrogenase family 1, subfamily A2 [Source:MGI Symbol;Acc:MGI:107928]
ENSMUSG00000000168	146.208	-1.2683	0.265381	-4.77915	1.76e-06	4.72e-05	Dlat	dihydrolipoamide S-acetyltransferase [Source:MGI Symbol;Acc:MGI:2385311]
ENSMUSG00000064368	144.927	2.40262	0.481046	4.99458	5.9e-07	1.67e-05	mt-Nd6	mitochondrially encoded NADH dehydrogenase 6 [Source:MGI Symbol;Acc:MGI:102495]
ENSMUSG00000053111	144.193	1.46996	0.304568	4.82638	1.39e-06	3.83e-05	Fank1	fibronectin type 3 and ankyrin repeat domains 1 [Source:MGI Symbol;Acc:MGI:1914180]
ENSMUSG00000024287	143.921	-2.18714	0.442065	-4.94755	7.52e-07	2.11e-05	Thoc1	THO complex 1 [Source:MGI Symbol;Acc:MGI:1919668]
ENSMUSG00000027379	143.446	-1.75098	0.461784	-3.79178	0.000149571	0.00248978	Bub1	BUB1, mitotic checkpoint serine/threonine kinase [Source:MGI Symbol;Acc:MGI:1100510]
ENSMUSG00000046556	143.081	3.21549	0.580094	5.54305	2.97e-08	1.07e-06	Zfp319	zinc finger protein 319 [Source:MGI Symbol;Acc:MGI:1890618]
ENSMUSG00000053783	142.927	1.27115	0.333888	3.80711	0.000140601	0.00236967	Liat1	ligand of ATE1 [Source:MGI Symbol;Acc:MGI:1921480]
ENSMUSG00000039512	142.589	1.41115	0.297292	4.74668	2.07e-06	5.39e-05	Bltp3a	bridge-like lipid transfer protein family member 3A [Source:MGI Symbol;Acc:MGI:3041238]
ENSMUSG00000029073	141.354	3.14002	1.07045	2.93338	0.00335297	0.0340154	Cptp	ceramide-1-phosphate transfer protein [Source:MGI Symbol;Acc:MGI:1933107]
ENSMUSG00000028409	141.283	-1.53984	0.302892	-5.0838	3.7e-07	1.1e-05	Smu1	smu-1 suppressor of mec-8 and unc-52 homolog (C. elegans) [Source:MGI Symbol;Acc:MGI:1915546]
ENSMUSG00000035183	141.194	4.6634	1.58121	2.94926	0.00318536	0.0327721	Slc24a5	solute carrier family 24, member 5 [Source:MGI Symbol;Acc:MGI:2677271]
ENSMUSG00000078554	140.042	2.93602	0.916677	3.20289	0.00136055	0.0166202	Fam229a	family with sequence similarity 229, member A [Source:MGI Symbol;Acc:MGI:1915483]
ENSMUSG00000049387	139.987	-1.13766	0.29693	-3.83139	0.000127423	0.00219052	Cox7b2	cytochrome c oxidase subunit 7B2 [Source:MGI Symbol;Acc:MGI:1925424]
ENSMUSG00000032330	139.958	-4.43113	1.33589	-3.31699	0.000909942	0.0119162	Cox7a2	cytochrome c oxidase subunit 7A2 [Source:MGI Symbol;Acc:MGI:1316715]
ENSMUSG00000029814	138.685	1.92356	0.258078	7.45343	9.09e-14	6.72e-12	Igf2bp3	insulin-like growth factor 2 mRNA binding protein 3 [Source:MGI Symbol;Acc:MGI:1890359]
ENSMUSG00000003604	138.649	1.20084	0.279233	4.3005	1.7e-05	0.000360753	Aven	apoptosis, caspase activation inhibitor [Source:MGI Symbol;Acc:MGI:1921518]
ENSMUSG00000036555	137.964	1.9662	0.557995	3.52369	0.000425576	0.00623849	Iqce	IQ motif containing E [Source:MGI Symbol;Acc:MGI:1921489]
ENSMUSG00000032566	137.905	1.33244	0.443331	3.00552	0.00265126	0.0285184	Nudt16l2	nudix hydrolase 16 like 2 [Source:MGI Symbol;Acc:MGI:1920782]
ENSMUSG00000052915	137.807	1.26472	0.32269	3.91931	8.88e-05	0.00160847	Msl1	male specific lethal 1 [Source:MGI Symbol;Acc:MGI:1921276]
ENSMUSG00000020520	137.148	2.01275	0.525155	3.83268	0.000126752	0.00218296	Galnt10	polypeptide N-acetylgalactosaminyltransferase 10 [Source:MGI Symbol;Acc:MGI:1890480]
ENSMUSG00000053192	136.677	2.90925	0.400098	7.27135	3.56e-13	2.46e-11	Mllt11	myeloid/lymphoid or mixed-lineage leukemia; translocated to, 11 [Source:MGI Symbol;Acc:MGI:1929671]
ENSMUSG00000047604	135.955	2.85141	0.398454	7.15617	8.3e-13	5.64e-11	Frat2	frequently rearranged in advanced T cell lymphomas 2 [Source:MGI Symbol;Acc:MGI:2673967]
ENSMUSG00000042719	135.825	-1.72467	0.561152	-3.07344	0.00211606	0.023995	Naa25	N(alpha)-acetyltransferase 25, NatB auxiliary subunit [Source:MGI Symbol;Acc:MGI:2442563]
ENSMUSG00000037253	135.798	2.27451	0.465136	4.88998	1.01e-06	2.8e-05	Mex3c	mex3 RNA binding family member C [Source:MGI Symbol;Acc:MGI:2652843]
ENSMUSG00000022205	135.575	-2.03459	0.588746	-3.45581	0.000548643	0.00778891	Sub1	SUB1 homolog, transcriptional regulator [Source:MGI Symbol;Acc:MGI:104811]
ENSMUSG00000028139	135.175	4.19346	1.34441	3.11918	0.00181355	0.0212009	Riiad1	regulatory subunit of type II PKA R-subunit (RIIa) domain containing 1 [Source:MGI Symbol;Acc:MGI:1913603]
ENSMUSG00000037279	134.726	1.90584	0.36368	5.24044	1.6e-07	5.08e-06	Ovol2	ovo like zinc finger 2 [Source:MGI Symbol;Acc:MGI:1338039]
ENSMUSG00000031453	134.257	3.37407	0.447652	7.53725	4.8e-14	3.6e-12	Rasa3	RAS p21 protein activator 3 [Source:MGI Symbol;Acc:MGI:1197013]
ENSMUSG00000046404	134.059	1.39481	0.306283	4.55401	5.26e-06	0.00012535	Yod1	YOD1 deubiquitinase [Source:MGI Symbol;Acc:MGI:2442596]
ENSMUSG00000033917	133.606	2.40606	0.434065	5.54308	2.97e-08	1.07e-06	Gde1	glycerophosphodiester phosphodiesterase 1 [Source:MGI Symbol;Acc:MGI:1891827]
ENSMUSG00000020936	132.97	-1.32624	0.448193	-2.95908	0.00308559	0.0319893	Nmt1	N-myristoyltransferase 1 [Source:MGI Symbol;Acc:MGI:102579]
ENSMUSG00000026473	132.869	4.50607	0.858776	5.24709	1.55e-07	4.94e-06	Glul	glutamate-ammonia ligase [Source:MGI Symbol;Acc:MGI:95739]
ENSMUSG00000029423	132.379	2.55365	0.439478	5.81063	6.22e-09	2.49e-07	Piwil1	piwi-like RNA-mediated gene silencing 1 [Source:MGI Symbol;Acc:MGI:1928897]
ENSMUSG00000067377	131.687	1.67076	0.585129	2.85537	0.00429872	0.0414136	Tspan6	tetraspanin 6 [Source:MGI Symbol;Acc:MGI:1926264]
ENSMUSG00000021039	131.6	-1.27916	0.437046	-2.92684	0.0034243	0.03448	Snw1	SNW domain containing 1 [Source:MGI Symbol;Acc:MGI:1913604]
ENSMUSG00000073894	131.247	1.57103	0.318196	4.9373	7.92e-07	2.21e-05	Rbmxl2	RNA binding motif protein, X-linked-like 2 [Source:MGI Symbol;Acc:MGI:1923822]
ENSMUSG00000034290	130.013	1.30729	0.436849	2.99255	0.00276658	0.0294334	Nek9	NIMA (never in mitosis gene a)-related expressed kinase 9 [Source:MGI Symbol;Acc:MGI:2387995]
ENSMUSG00000041040	129.731	1.74786	0.332435	5.25774	1.46e-07	4.67e-06	Fam117b	family with sequence similarity 117, member B [Source:MGI Symbol;Acc:MGI:1920000]
ENSMUSG00000003032	127.901	2.42658	0.36429	6.66113	2.72e-11	1.47e-09	Klf4	Kruppel-like transcription factor 4 (gut) [Source:MGI Symbol;Acc:MGI:1342287]
ENSMUSG00000020496	127.495	1.42341	0.417133	3.41236	0.000644025	0.00887646	Rnf187	ring finger protein 187 [Source:MGI Symbol;Acc:MGI:1914224]
ENSMUSG00000057706	127.257	3.01364	0.30501	9.88046	5.06e-23	7.14e-21	Mex3b	mex3 RNA binding family member B [Source:MGI Symbol;Acc:MGI:1918252]
ENSMUSG00000024510	127.041	-1.38335	0.347263	-3.98358	6.79e-05	0.00126848	Ftmt	ferritin mitochondrial [Source:MGI Symbol;Acc:MGI:1914884]
ENSMUSG00000039275	126.964	3.29988	0.374169	8.81922	1.15e-18	1.22e-16	Foxk2	forkhead box K2 [Source:MGI Symbol;Acc:MGI:1916087]
ENSMUSG00000036046	126.558	5.07446	0.637478	7.9602	1.72e-15	1.45e-13	5031439G07Rik	RIKEN cDNA 5031439G07 gene [Source:MGI Symbol;Acc:MGI:2444899]
ENSMUSG00000029094	125.996	1.79741	0.507338	3.54284	0.000395849	0.00587559	Afap1	actin filament associated protein 1 [Source:MGI Symbol;Acc:MGI:1917542]
ENSMUSG00000027480	125.733	-1.67049	0.427718	-3.9056	9.4e-05	0.00169275	Sun5	Sad1 and UNC84 domain containing 5 [Source:MGI Symbol;Acc:MGI:1923657]
ENSMUSG00000039652	125.64	5.05659	1.7329	2.918	0.00352282	0.0351353	Cpeb3	cytoplasmic polyadenylation element binding protein 3 [Source:MGI Symbol;Acc:MGI:2443075]
ENSMUSG00000009630	124.871	2.19433	0.395274	5.55142	2.83e-08	1.04e-06	Ppp2cb	protein phosphatase 2 (formerly 2A), catalytic subunit, beta isoform [Source:MGI Symbol;Acc:MGI:1321161]
ENSMUSG00000034552	124.7	-1.42376	0.480801	-2.96124	0.00306406	0.031801	Zswim2	zinc finger SWIM-type containing 2 [Source:MGI Symbol;Acc:MGI:1919111]
ENSMUSG00000078786	123.77	1.9613	0.625514	3.1355	0.00171562	0.0203018	Actmap	actin maturation protease [Source:MGI Symbol;Acc:MGI:3041247]
ENSMUSG00000026842	123.723	5.51031	1.24978	4.40904	1.04e-05	0.000231537	Abl1	c-abl oncogene 1, non-receptor tyrosine kinase [Source:MGI Symbol;Acc:MGI:87859]
ENSMUSG00000066382	123.7	1.40741	0.387543	3.63164	0.000281628	0.00435096	Iqcf5	IQ motif containing F5 [Source:MGI Symbol;Acc:MGI:1922720]
ENSMUSG00000030556	123.678	4.06909	1.31035	3.10535	0.00190051	0.0219674	Lrrc28	leucine rich repeat containing 28 [Source:MGI Symbol;Acc:MGI:1915689]
ENSMUSG00000064341	123.576	3.60161	0.554712	6.49274	8.43e-11	4.28e-09	mt-Nd1	mitochondrially encoded NADH dehydrogenase 1 [Source:MGI Symbol;Acc:MGI:101787]
ENSMUSG00000032294	122.947	3.35451	0.545015	6.15489	7.51e-10	3.38e-08	Pkm	pyruvate kinase, muscle [Source:MGI Symbol;Acc:MGI:97591]
ENSMUSG00000029705	122.416	1.8799	0.600359	3.1313	0.00174036	0.0205176	Cux1	cut-like homeobox 1 [Source:MGI Symbol;Acc:MGI:88568]
ENSMUSG00000013663	122.361	1.85578	0.294654	6.29818	3.01e-10	1.42e-08	Pten	phosphatase and tensin homolog [Source:MGI Symbol;Acc:MGI:109583]
ENSMUSG00000026174	121.321	2.15113	0.489179	4.39743	1.1e-05	0.000242558	Cnot9	CCR4-NOT transcription complex, subunit 9 [Source:MGI Symbol;Acc:MGI:1928902]
ENSMUSG00000072663	121.195	-3.85471	1.3163	-2.92845	0.00340661	0.0343751	Spef2	sperm flagellar 2 [Source:MGI Symbol;Acc:MGI:2443727]
ENSMUSG00000004798	120.953	2.37874	0.557985	4.26309	2.02e-05	0.000422687	Ulk2	unc-51 like kinase 2 [Source:MGI Symbol;Acc:MGI:1352758]
ENSMUSG00000043468	120.785	-1.15386	0.329608	-3.50072	0.000464011	0.00670829	Adam30	a disintegrin and metallopeptidase domain 30 [Source:MGI Symbol;Acc:MGI:1918328]
ENSMUSG00000024269	120.258	1.81788	0.379644	4.78839	1.68e-06	4.53e-05	Tpgs2	tubulin polyglutamylase complex subunit 2 [Source:MGI Symbol;Acc:MGI:1913898]
ENSMUSG00000095789	120.099	5.63392	0.680673	8.27699	1.26e-16	1.19e-14	Nupr2	nuclear protein transcriptional regulator 2 [Source:MGI Symbol;Acc:MGI:1923099]
ENSMUSG00000026353	119.431	-1.46161	0.436806	-3.34614	0.000819458	0.0109388	Ubxn4	UBX domain protein 4 [Source:MGI Symbol;Acc:MGI:1915062]
ENSMUSG00000007950	118.834	2.20086	0.317017	6.94242	3.85e-12	2.48e-10	Abhd8	abhydrolase domain containing 8 [Source:MGI Symbol;Acc:MGI:1918946]
ENSMUSG00000046447	118.768	2.37385	0.469299	5.05829	4.23e-07	1.24e-05	Camk2n1	calcium/calmodulin-dependent protein kinase II inhibitor 1 [Source:MGI Symbol;Acc:MGI:1913509]
ENSMUSG00000029030	117.948	2.09822	0.402261	5.21608	1.83e-07	5.7e-06	Tprg1l	transformation related protein 63 regulated 1 like [Source:MGI Symbol;Acc:MGI:1915058]
ENSMUSG00000049008	117.657	4.98622	1.75203	2.84597	0.00442765	0.0423492	BB014433	expressed sequence BB014433 [Source:MGI Symbol;Acc:MGI:2142823]
ENSMUSG00000044664	117.463	-1.60672	0.431082	-3.72719	0.000193625	0.0031241	Prss42	serine protease 42 [Source:MGI Symbol;Acc:MGI:2665280]
ENSMUSG00000027706	116.8	-1.14254	0.410482	-2.78342	0.00537893	0.0496174	Sec62	SEC62 homolog, preprotein translocation [Source:MGI Symbol;Acc:MGI:1916526]
ENSMUSG00000027304	116.426	-1.44376	0.454816	-3.17439	0.00150154	0.0180624	Rtf1	RTF1, Paf1/RNA polymerase II complex component [Source:MGI Symbol;Acc:MGI:1309480]
ENSMUSG00000062773	115.274	-2.59612	0.567076	-4.57808	4.69e-06	0.000112613	Tex101	testis expressed gene 101 [Source:MGI Symbol;Acc:MGI:1930791]
ENSMUSG00000034563	113.289	4.75546	1.36701	3.47874	0.000503786	0.0072062	Ccpg1	cell cycle progression 1 [Source:MGI Symbol;Acc:MGI:1196419]
ENSMUSG00000025544	112.961	1.77913	0.505842	3.51716	0.000436197	0.0063744	Tm9sf2	transmembrane 9 superfamily member 2 [Source:MGI Symbol;Acc:MGI:1915309]
ENSMUSG00000040659	112.703	1.70458	0.377412	4.5165	6.29e-06	0.000147502	Efhd2	EF hand domain containing 2 [Source:MGI Symbol;Acc:MGI:106504]
ENSMUSG00000032413	112.168	2.47014	0.556852	4.4359	9.17e-06	0.000205431	Rasa2	RAS p21 protein activator 2 [Source:MGI Symbol;Acc:MGI:2149960]
ENSMUSG00000042446	111.103	-2.21733	0.442744	-5.00814	5.5e-07	1.58e-05	Zmym4	zinc finger, MYM-type 4 [Source:MGI Symbol;Acc:MGI:1915035]
ENSMUSG00000090626	110.848	-1.37792	0.480301	-2.86886	0.00411955	0.0399901	Tex9	testis expressed gene 9 [Source:MGI Symbol;Acc:MGI:1201610]
ENSMUSG00000057863	110.43	4.23077	1.43412	2.95008	0.00317691	0.0327208	Rpl36	ribosomal protein L36 [Source:MGI Symbol;Acc:MGI:1860603]
ENSMUSG00000020562	109.977	-1.61549	0.383713	-4.21016	2.55e-05	0.000524531	Efcab10	EF-hand calcium binding domain 10 [Source:MGI Symbol;Acc:MGI:1922290]
ENSMUSG00000033417	109.784	3.48993	0.623092	5.60098	2.13e-08	7.97e-07	Cacul1	CDK2 associated, cullin domain 1 [Source:MGI Symbol;Acc:MGI:1926082]
ENSMUSG00000036800	108.084	-1.04658	0.341153	-3.06778	0.00215655	0.024274	Fam135b	family with sequence similarity 135, member B [Source:MGI Symbol;Acc:MGI:1917613]
ENSMUSG00000026778	107.878	6.04093	1.85026	3.26491	0.00109497	0.0138408	Prkcq	protein kinase C, theta [Source:MGI Symbol;Acc:MGI:97601]
ENSMUSG00000050192	106.761	1.8861	0.491006	3.8413	0.000122384	0.0021232	Eif5a2	eukaryotic translation initiation factor 5A2 [Source:MGI Symbol;Acc:MGI:1933735]
ENSMUSG00000027408	106.419	1.21982	0.426023	2.86328	0.0041928	0.0406036	Cpxm1	carboxypeptidase X, M14 family member 1 [Source:MGI Symbol;Acc:MGI:1934569]
ENSMUSG00000056919	105.838	-1.76187	0.557743	-3.15892	0.00158355	0.0189285	Cep162	centrosomal protein 162 [Source:MGI Symbol;Acc:MGI:1925343]
ENSMUSG00000074785	104.961	3.7762	1.12468	3.35758	0.00078627	0.0105749	Plxnc1	plexin C1 [Source:MGI Symbol;Acc:MGI:1890127]
ENSMUSG00000024212	104.19	2.07955	0.336924	6.17215	6.74e-10	3.06e-08	Mllt1	myeloid/lymphoid or mixed-lineage leukemia; translocated to, 1 [Source:MGI Symbol;Acc:MGI:1927238]
ENSMUSG00000022255	104.085	2.40712	0.620317	3.88046	0.00010426	0.00185646	Mtdh	metadherin [Source:MGI Symbol;Acc:MGI:1914404]
ENSMUSG00000121583	103.83	3.54376	0.536621	6.60383	4.01e-11	2.13e-09	Zftraf1	zinc finger TRAF type containing 1 [Source:NCBI gene (formerly Entrezgene);Acc:54151]
ENSMUSG00000062944	103.524	2.57749	0.675421	3.81612	0.000135565	0.00229707	9130023H24Rik	RIKEN cDNA 9130023H24 gene [Source:MGI Symbol;Acc:MGI:2442738]
ENSMUSG00000050304	102.443	-1.82525	0.355984	-5.12734	2.94e-07	8.82e-06	Slc25a2	solute carrier family 25 (mitochondrial carrier, ornithine transporter) member 2 [Source:MGI Symbol;Acc:MGI:2137907]
ENSMUSG00000023047	102.208	6.01323	1.62537	3.69961	0.000215932	0.00343156	Amhr2	anti-Mullerian hormone type 2 receptor [Source:MGI Symbol;Acc:MGI:105062]
ENSMUSG00000021189	102.143	1.71471	0.510479	3.35901	0.000782224	0.0105505	Atxn3	ataxin 3 [Source:MGI Symbol;Acc:MGI:1099442]
ENSMUSG00000025357	102.017	5.56433	1.42919	3.89334	9.89e-05	0.00177055	Dgka	diacylglycerol kinase, alpha [Source:MGI Symbol;Acc:MGI:102952]
ENSMUSG00000068921	101.957	1.61359	0.481853	3.34871	0.000811883	0.0108884	Dap3	death associated protein 3 [Source:MGI Symbol;Acc:MGI:1929538]
ENSMUSG00000024384	101.883	-1.94279	0.458927	-4.23334	2.3e-05	0.000478449	Iws1	IWS1, SUPT6 interacting protein [Source:MGI Symbol;Acc:MGI:1920723]
ENSMUSG00000030976	101.844	-1.59448	0.52252	-3.05152	0.00227687	0.0252082	Tex36	testis expressed 36 [Source:MGI Symbol;Acc:MGI:1921058]
ENSMUSG00000090115	101.6	2.3118	0.58268	3.96753	7.26e-05	0.00134395	Usp49	ubiquitin specific peptidase 49 [Source:MGI Symbol;Acc:MGI:2685391]
ENSMUSG00000032458	101.154	-1.45635	0.372192	-3.91289	9.12e-05	0.00164556	Copb2	COPI coat complex subunit beta 2 [Source:MGI Symbol;Acc:MGI:1354962]
ENSMUSG00000030292	101.129	-1.41191	0.433624	-3.25606	0.00112968	0.0142226	Smco2	single-pass membrane protein with coiled-coil domains 2 [Source:MGI Symbol;Acc:MGI:1916621]
ENSMUSG00000029726	101.1	2.13198	0.52376	4.07053	4.69e-05	0.000916328	Mepce	methylphosphate capping enzyme [Source:MGI Symbol;Acc:MGI:106477]
ENSMUSG00000047669	100.617	1.35984	0.444562	3.05883	0.00222206	0.0248092	Msl3l2	MSL3 like 2 [Source:MGI Symbol;Acc:MGI:1920640]
ENSMUSG00000085861	100.531	-2.00423	0.397644	-5.04026	4.65e-07	1.36e-05	Armh2	armadillo-like helical domain containing 2 [Source:MGI Symbol;Acc:MGI:1916676]
ENSMUSG00000097075	100.273	3.66002	0.948865	3.85726	0.000114665	0.00201891	Cdiptos	CDIP transferase, opposite strand [Source:MGI Symbol;Acc:MGI:2443610]
ENSMUSG00000025103	99.9556	2.35353	0.344662	6.82851	8.58e-12	5.01e-10	Btbd1	BTB domain containing 1 [Source:MGI Symbol;Acc:MGI:1933765]
ENSMUSG00000046282	99.7649	-1.19809	0.410031	-2.92196	0.00347841	0.0348025	Adam20	a disintegrin and metallopeptidase domain 20 [Source:MGI Symbol;Acc:MGI:2152342]
ENSMUSG00000034152	99.465	-1.53923	0.417097	-3.69034	0.000223955	0.00355284	Exoc3	exocyst complex component 3 [Source:MGI Symbol;Acc:MGI:2443972]
ENSMUSG00000047150	98.7374	6.52976	1.44656	4.51399	6.36e-06	0.000148493	Cimip3	ciliary microtubule inner protein 3 [Source:MGI Symbol;Acc:MGI:1922712]
ENSMUSG00000055239	98.1366	3.01075	0.632562	4.75962	1.94e-06	5.14e-05	Kcmf1	potassium channel modulatory factor 1 [Source:MGI Symbol;Acc:MGI:1921537]
ENSMUSG00000001016	97.811	-1.51102	0.42046	-3.59373	0.00032598	0.00496319	Ilf2	interleukin enhancer binding factor 2 [Source:MGI Symbol;Acc:MGI:1915031]
ENSMUSG00000044927	97.6083	1.87517	0.553076	3.39044	0.0006978	0.00954804	H1f10	H1.10 linker histone [Source:MGI Symbol;Acc:MGI:2685307]
ENSMUSG00000004356	97.0386	-1.41138	0.415346	-3.39809	0.000678572	0.0093119	Utp20	UTP20 small subunit processome component [Source:MGI Symbol;Acc:MGI:1917933]
ENSMUSG00000028271	95.8405	-1.10906	0.392538	-2.82535	0.00472286	0.0447442	Gtf2b	general transcription factor IIB [Source:MGI Symbol;Acc:MGI:2385191]
ENSMUSG00000048799	95.2748	1.8531	0.370002	5.00833	5.49e-07	1.58e-05	Cep120	centrosomal protein 120 [Source:MGI Symbol;Acc:MGI:2147298]
ENSMUSG00000031576	95.1796	-1.27511	0.387801	-3.28805	0.00100884	0.0129954	Kcnu1	potassium channel, subfamily U, member 1 [Source:MGI Symbol;Acc:MGI:1202300]
ENSMUSG00000060678	95.0959	-1.70785	0.370937	-4.60415	4.14e-06	0.000100922	H4c3	H4 clustered histone 3 [Source:MGI Symbol;Acc:MGI:2448421]
ENSMUSG00000069170	94.9044	1.0146	0.346777	2.9258	0.00343572	0.0345002	Adgrv1	adhesion G protein-coupled receptor V1 [Source:MGI Symbol;Acc:MGI:1274784]
ENSMUSG00000056267	94.5788	1.04706	0.344334	3.04083	0.00235928	0.0259384	Cep70	centrosomal protein 70 [Source:MGI Symbol;Acc:MGI:1915371]
ENSMUSG00000059554	94.4221	1.62433	0.539135	3.01285	0.00258809	0.0279661	Ccdc28a	coiled-coil domain containing 28A [Source:MGI Symbol;Acc:MGI:2443508]
ENSMUSG00000031590	94.0324	-1.56115	0.473857	-3.29457	0.000985723	0.0127149	Frg1	FSHD region gene 1 [Source:MGI Symbol;Acc:MGI:893597]
ENSMUSG00000020706	92.208	-1.57729	0.408399	-3.86213	0.000112404	0.00199022	Ftsj3	FtsJ RNA 2'-O-methyltransferase 3 [Source:MGI Symbol;Acc:MGI:1860295]
ENSMUSG00000023084	91.8761	1.73876	0.334727	5.19458	2.05e-07	6.32e-06	Lrrc71	leucine rich repeat containing 71 [Source:MGI Symbol;Acc:MGI:1921735]
ENSMUSG00000011350	90.9458	4.99026	1.71122	2.9162	0.00354323	0.0353016	Gm5893	predicted gene 5893 [Source:MGI Symbol;Acc:MGI:3645761]
ENSMUSG00000064345	90.8579	2.04933	0.438771	4.67062	3e-06	7.6e-05	mt-Nd2	mitochondrially encoded NADH dehydrogenase 2 [Source:MGI Symbol;Acc:MGI:102500]
ENSMUSG00000020982	89.4557	-1.80528	0.44948	-4.01637	5.91e-05	0.00112436	Nemf	nuclear export mediator factor [Source:MGI Symbol;Acc:MGI:1918305]
ENSMUSG00000026495	89.3888	-1.36729	0.466325	-2.93204	0.00336742	0.0340888	Efcab2	EF-hand calcium binding domain 2 [Source:MGI Symbol;Acc:MGI:1915476]
ENSMUSG00000036181	89.2682	-1.96272	0.51675	-3.79821	0.000145744	0.00243035	H1f2	H1.2 linker histone, cluster member [Source:MGI Symbol;Acc:MGI:1931526]
ENSMUSG00000070002	88.6678	1.33514	0.357969	3.72977	0.000191656	0.00310825	Ell	elongation factor RNA polymerase II [Source:MGI Symbol;Acc:MGI:109377]
ENSMUSG00000037958	87.6435	-1.57232	0.522875	-3.00706	0.00263787	0.028439	Nsrp1	nuclear speckle regulatory protein 1 [Source:MGI Symbol;Acc:MGI:2144305]
ENSMUSG00000028998	87.3725	-1.61214	0.40379	-3.99253	6.54e-05	0.00123127	Tomm7	translocase of outer mitochondrial membrane 7 [Source:MGI Symbol;Acc:MGI:1913419]
ENSMUSG00000037363	87.0857	1.33791	0.473238	2.82714	0.00469651	0.0445391	Letm2	leucine zipper-EF-hand containing transmembrane protein 2 [Source:MGI Symbol;Acc:MGI:2444979]
ENSMUSG00000025130	86.4894	-2.74094	0.485939	-5.64052	1.7e-08	6.44e-07	P4hb	prolyl 4-hydroxylase, beta polypeptide [Source:MGI Symbol;Acc:MGI:97464]
ENSMUSG00000018565	85.776	-1.43109	0.356444	-4.0149	5.95e-05	0.00112909	Elp5	elongator acetyltransferase complex subunit 5 [Source:MGI Symbol;Acc:MGI:1859017]
ENSMUSG00000002326	85.4054	-2.3855	0.667244	-3.57515	0.000350028	0.00526992	Gmpr2	guanosine monophosphate reductase 2 [Source:MGI Symbol;Acc:MGI:1917903]
ENSMUSG00000033439	82.829	-3.35762	0.946835	-3.54615	0.000390901	0.00581127	Trmt13	tRNA methyltransferase 13 [Source:MGI Symbol;Acc:MGI:1925219]
ENSMUSG00000078721	82.7183	-3.26132	0.634176	-5.14261	2.71e-07	8.24e-06	Spata31f1a	spermatogenesis associated 31 subfamily F member 1A [Source:MGI Symbol;Acc:MGI:3651059]
ENSMUSG00000051769	82.5796	-1.72948	0.37673	-4.59076	4.42e-06	0.00010707	Wfdc15a	WAP four-disulfide core domain 15A [Source:MGI Symbol;Acc:MGI:1915471]
ENSMUSG00000024981	82.5738	2.11195	0.3818	5.53154	3.17e-08	1.14e-06	Acsl5	acyl-CoA synthetase long-chain family member 5 [Source:MGI Symbol;Acc:MGI:1919129]
ENSMUSG00000049971	82.5297	2.06966	0.361821	5.72012	1.06e-08	4.13e-07	Glt1d1	glycosyltransferase 1 domain containing 1 [Source:MGI Symbol;Acc:MGI:2442755]
ENSMUSG00000056493	82.4201	1.7796	0.404786	4.3964	1.1e-05	0.000242951	Foxk1	forkhead box K1 [Source:MGI Symbol;Acc:MGI:1347488]
ENSMUSG00000064363	81.9281	3.70931	0.630534	5.88282	4.03e-09	1.67e-07	mt-Nd4	mitochondrially encoded NADH dehydrogenase 4 [Source:MGI Symbol;Acc:MGI:102498]
ENSMUSG00000028182	81.8606	1.38242	0.434302	3.18309	0.00145712	0.0176403	Lrriq3	leucine-rich repeats and IQ motif containing 3 [Source:MGI Symbol;Acc:MGI:1921685]
ENSMUSG00000056763	81.5096	3.25254	0.70879	4.58886	4.46e-06	0.000107328	Cspp1	centrosome and spindle pole associated protein 1 [Source:MGI Symbol;Acc:MGI:2681832]
ENSMUSG00000055745	81.2897	3.38701	0.671508	5.04389	4.56e-07	1.34e-05	Rtl6	retrotransposon Gag like 6 [Source:MGI Symbol;Acc:MGI:2675858]
ENSMUSG00000022314	81.247	-1.34113	0.473335	-2.83336	0.0046062	0.0438145	Rad21	RAD21 cohesin complex component [Source:MGI Symbol;Acc:MGI:108016]
ENSMUSG00000025257	81.146	-2.0998	0.454405	-4.62098	3.82e-06	9.4e-05	Ribc1	RIB43A domain with coiled-coils 1 [Source:MGI Symbol;Acc:MGI:1913861]
ENSMUSG00000037722	80.9307	-4.27724	1.24417	-3.43784	0.000586383	0.00819598	Gnpnat1	glucosamine-phosphate N-acetyltransferase 1 [Source:MGI Symbol;Acc:MGI:1858963]
ENSMUSG00000024350	80.6863	1.47793	0.513995	2.87537	0.0040355	0.0393763	Dnajc18	DnaJ heat shock protein family (Hsp40) member C18 [Source:MGI Symbol;Acc:MGI:1923844]
ENSMUSG00000003131	79.9786	1.83734	0.508839	3.61085	0.0003052	0.00467694	Pafah1b2	platelet-activating factor acetylhydrolase, isoform 1b, subunit 2 [Source:MGI Symbol;Acc:MGI:108415]
ENSMUSG00000037594	79.8353	5.04591	0.917642	5.49878	3.82e-08	1.34e-06	Clba1	clathrin binding box of aftiphilin containing 1 [Source:MGI Symbol;Acc:MGI:2443738]
ENSMUSG00000039067	79.772	-1.07303	0.362215	-2.9624	0.00305255	0.0317877	Psmd7	proteasome (prosome, macropain) 26S subunit, non-ATPase, 7 [Source:MGI Symbol;Acc:MGI:1351511]
ENSMUSG00000079584	79.4384	-1.97242	0.608898	-3.23934	0.00119809	0.0149642	Tm9sf5	transmembrane 9 superfamily member 5 [Source:MGI Symbol;Acc:MGI:2685210]
ENSMUSG00000039813	79.1398	1.28068	0.453907	2.82146	0.00478055	0.0451243	Tbc1d2	TBC1 domain family, member 2 [Source:MGI Symbol;Acc:MGI:2652885]
ENSMUSG00000021810	79.1374	-1.41995	0.461637	-3.0759	0.00209871	0.0239461	Ecd	ecdysoneless cell cycle regulator [Source:MGI Symbol;Acc:MGI:1917851]
ENSMUSG00000051695	78.561	1.62751	0.504086	3.22865	0.00124378	0.015494	Pcbp1	poly(rC) binding protein 1 [Source:MGI Symbol;Acc:MGI:1345635]
ENSMUSG00000018543	78.3906	-1.69341	0.48951	-3.4594	0.000541385	0.00769744	Spmap1	sperm microtubule associated protein 1 [Source:MGI Symbol;Acc:MGI:1919465]
ENSMUSG00000034300	78.3232	2.8019	0.522862	5.35878	8.38e-08	2.83e-06	Fam53c	family with sequence similarity 53, member C [Source:MGI Symbol;Acc:MGI:1913556]
ENSMUSG00000039021	78.2542	4.17887	1.33976	3.1191	0.00181402	0.0212009	Ttc16	tetratricopeptide repeat domain 16 [Source:MGI Symbol;Acc:MGI:2443048]
ENSMUSG00000021890	78.2159	2.03178	0.555991	3.65434	0.000257847	0.00402301	Eaf1	ELL associated factor 1 [Source:MGI Symbol;Acc:MGI:1921677]
ENSMUSG00000027703	78.1876	-1.84427	0.639573	-2.88359	0.00393168	0.0385623	Lrriq4	leucine-rich repeats and IQ motif containing 4 [Source:MGI Symbol;Acc:MGI:1915557]
ENSMUSG00000031085	78.0884	5.37385	1.77674	3.02455	0.00248999	0.0270297	Acte1	actin, epsilon 1 [Source:MGI Symbol;Acc:MGI:2685344]
ENSMUSG00000008763	77.9717	1.796	0.500301	3.58985	0.000330874	0.00502961	Man1a2	mannosidase, alpha, class 1A, member 2 [Source:MGI Symbol;Acc:MGI:104676]
ENSMUSG00000022993	77.9654	-1.39373	0.364868	-3.81981	0.000133554	0.00227114	Spmip11	sperm microtubule inner protein 11 [Source:MGI Symbol;Acc:MGI:1921113]
ENSMUSG00000027459	77.6007	5.91406	1.46636	4.03316	5.5e-05	0.00105971	Fam110a	family with sequence similarity 110, member A [Source:MGI Symbol;Acc:MGI:1921097]
ENSMUSG00000038416	77.556	-4.08582	1.22721	-3.32936	0.000870466	0.0114948	Cdc16	CDC16 cell division cycle 16 [Source:MGI Symbol;Acc:MGI:1917207]
ENSMUSG00000028427	77.3039	1.60618	0.428078	3.75207	0.000175378	0.00285959	Aqp7	aquaporin 7 [Source:MGI Symbol;Acc:MGI:1314647]
ENSMUSG00000035248	77.2462	-1.498	0.468384	-3.19824	0.00138268	0.016847	Tut7	terminal uridylyl transferase 7 [Source:MGI Symbol;Acc:MGI:2387179]
ENSMUSG00000039883	76.8157	-4.33329	1.32411	-3.27259	0.00106566	0.0135793	Lrrc17	leucine rich repeat containing 17 [Source:MGI Symbol;Acc:MGI:1921761]
ENSMUSG00000038150	76.6791	1.69372	0.565587	2.99462	0.00274791	0.0293245	Ormdl3	ORM1-like 3 (S. cerevisiae) [Source:MGI Symbol;Acc:MGI:1913862]
ENSMUSG00000020393	76.5455	3.62987	1.0165	3.57096	0.000355679	0.00533513	Kremen1	kringle containing transmembrane protein 1 [Source:MGI Symbol;Acc:MGI:1933988]
ENSMUSG00000027309	76.2265	1.67095	0.5255	3.17974	0.00147406	0.0178226	Dnaaf9	dynein axonemal assembly factor 9 [Source:MGI Symbol;Acc:MGI:1923029]
ENSMUSG00000032042	75.7798	1.08294	0.376611	2.87549	0.00403397	0.0393763	Srpr	signal recognition particle receptor ('docking protein') [Source:MGI Symbol;Acc:MGI:1914648]
ENSMUSG00000055547	75.7185	-1.57889	0.547182	-2.8855	0.00390795	0.0384092	Apobec4	apolipoprotein B mRNA editing enzyme catalytic polypeptide-like 4 [Source:MGI Symbol;Acc:MGI:1918531]
ENSMUSG00000033712	75.6942	1.37672	0.381627	3.60751	0.000309148	0.00472976	Ccar2	cell cycle activator and apoptosis regulator 2 [Source:MGI Symbol;Acc:MGI:2444228]
ENSMUSG00000028878	74.7014	1.29243	0.448646	2.88074	0.00396743	0.0387921	Fam76a	family with sequence similarity 76, member A [Source:MGI Symbol;Acc:MGI:2385211]
ENSMUSG00000042372	74.6088	4.55129	1.47996	3.07529	0.00210301	0.0239461	Dmrt3	doublesex and mab-3 related transcription factor 3 [Source:MGI Symbol;Acc:MGI:2449470]
ENSMUSG00000020941	74.4166	4.03635	0.904449	4.46277	8.09e-06	0.000185223	Map3k14	mitogen-activated protein kinase kinase kinase 14 [Source:MGI Symbol;Acc:MGI:1858204]
ENSMUSG00000001157	74.009	1.47782	0.412136	3.58577	0.000336081	0.00507371	Gmcl1	germ cell-less, spermatogenesis associated 1 [Source:MGI Symbol;Acc:MGI:1345156]
ENSMUSG00000032316	73.8931	-2.50449	0.598825	-4.18234	2.89e-05	0.000585405	Clk3	CDC-like kinase 3 [Source:MGI Symbol;Acc:MGI:1098670]
ENSMUSG00000020946	73.1728	1.76124	0.448009	3.93126	8.45e-05	0.00153646	Gosr2	golgi SNAP receptor complex member 2 [Source:MGI Symbol;Acc:MGI:1927204]
ENSMUSG00000098134	72.8696	-2.1352	0.41339	-5.16509	2.4e-07	7.33e-06	Rnf113a2	ring finger protein 113A2 [Source:MGI Symbol;Acc:MGI:1913631]
ENSMUSG00000031967	72.3712	3.05819	0.481887	6.34629	2.21e-10	1.08e-08	Afg3l1	AFG3-like AAA ATPase 1 [Source:MGI Symbol;Acc:MGI:1928277]
ENSMUSG00000032096	71.1648	-1.59767	0.416795	-3.83322	0.000126479	0.00218222	Arcn1	archain 1 [Source:MGI Symbol;Acc:MGI:2387591]
ENSMUSG00000031530	70.9619	2.93357	0.669016	4.3849	1.16e-05	0.000253608	Dusp4	dual specificity phosphatase 4 [Source:MGI Symbol;Acc:MGI:2442191]
ENSMUSG00000056708	70.8578	2.5564	0.652902	3.91544	9.02e-05	0.00163136	Ier5	immediate early response 5 [Source:MGI Symbol;Acc:MGI:1337072]
ENSMUSG00000070291	70.8339	-1.89069	0.535233	-3.53246	0.000411718	0.00608248	Ddx43	DEAD box helicase 43 [Source:MGI Symbol;Acc:MGI:3642857]
ENSMUSG00000023104	70.7197	1.43996	0.418882	3.43762	0.000586851	0.00819598	Rfc2	replication factor C (activator 1) 2 [Source:MGI Symbol;Acc:MGI:1341868]
ENSMUSG00000033102	70.1986	3.6879	0.679571	5.4268	5.74e-08	1.99e-06	Cdc14b	CDC14 cell division cycle 14B [Source:MGI Symbol;Acc:MGI:2441808]
ENSMUSG00000040250	69.6119	-2.755	0.463264	-5.94693	2.73e-09	1.16e-07	Ints13	integrator complex subunit 13 [Source:MGI Symbol;Acc:MGI:1918427]
ENSMUSG00000022773	69.473	2.50153	0.861787	2.90272	0.00369934	0.0365871	Ypel1	yippee like 1 [Source:MGI Symbol;Acc:MGI:1913303]
ENSMUSG00000021391	68.8098	-2.54855	0.459413	-5.54741	2.9e-08	1.06e-06	Cenpp	centromere protein P [Source:MGI Symbol;Acc:MGI:1913586]
ENSMUSG00000037905	68.7904	3.47445	1.11963	3.10321	0.00191435	0.0221003	Bri3bp	Bri3 binding protein [Source:MGI Symbol;Acc:MGI:1924059]
ENSMUSG00000028821	68.7044	-1.93594	0.618185	-3.13165	0.00173829	0.0205176	Syf2	SYF2 homolog, RNA splicing factor (S. cerevisiae) [Source:MGI Symbol;Acc:MGI:1915842]
ENSMUSG00000022388	68.6354	1.76037	0.607646	2.89703	0.00376708	0.0371793	Ttll8	tubulin tyrosine ligase-like family, member 8 [Source:MGI Symbol;Acc:MGI:1922902]
ENSMUSG00000021366	68.6328	2.80846	0.709648	3.95753	7.57e-05	0.00139307	Hivep1	human immunodeficiency virus type I enhancer binding protein 1 [Source:MGI Symbol;Acc:MGI:96100]
ENSMUSG00000051934	68.6077	1.82296	0.59093	3.0849	0.0020362	0.0233644	Spats2	spermatogenesis associated, serine-rich 2 [Source:MGI Symbol;Acc:MGI:1919822]
ENSMUSG00000005802	68.229	4.8135	0.703431	6.84289	7.76e-12	4.6e-10	Slc30a4	solute carrier family 30 (zinc transporter), member 4 [Source:MGI Symbol;Acc:MGI:1345282]
ENSMUSG00000006435	67.8461	5.26009	1.74003	3.02299	0.00250291	0.0271077	Neurl1a	neuralized E3 ubiquitin protein ligase 1A [Source:MGI Symbol;Acc:MGI:1334263]
ENSMUSG00000001542	67.7919	2.36818	0.494017	4.79372	1.64e-06	4.42e-05	Ell2	elongation factor for RNA polymerase II 2 [Source:MGI Symbol;Acc:MGI:2183438]
ENSMUSG00000068740	67.5658	2.56334	0.690562	3.71196	0.000205657	0.00329017	Celsr2	cadherin, EGF LAG seven-pass G-type receptor 2 [Source:MGI Symbol;Acc:MGI:1858235]
ENSMUSG00000024241	67.378	3.44797	1.05521	3.26759	0.00108469	0.0137738	Sos1	SOS Ras/Rac guanine nucleotide exchange factor 1 [Source:MGI Symbol;Acc:MGI:98354]
ENSMUSG00000036241	67.2783	2.51836	0.67894	3.70925	0.000207877	0.00332006	Ube2r2	ubiquitin-conjugating enzyme E2R 2 [Source:MGI Symbol;Acc:MGI:1914865]
ENSMUSG00000005103	67.1929	3.0298	0.996909	3.0392	0.00237211	0.0260189	Wdr1	WD repeat domain 1 [Source:MGI Symbol;Acc:MGI:1337100]
ENSMUSG00000049160	67.0391	2.46252	0.422637	5.82655	5.66e-09	2.29e-07	Tex50	testis expressed 50 [Source:MGI Symbol;Acc:MGI:1922183]
ENSMUSG00000037826	66.8902	4.12348	1.25773	3.2785	0.0010436	0.0134066	Ppm1k	protein phosphatase 1K (PP2C domain containing) [Source:MGI Symbol;Acc:MGI:2442111]
ENSMUSG00000005621	66.5358	2.08837	0.462693	4.51351	6.38e-06	0.000148493	Zfp592	zinc finger protein 592 [Source:MGI Symbol;Acc:MGI:2443541]
ENSMUSG00000070283	66.4029	1.82716	0.429073	4.25839	2.06e-05	0.000430709	Ndufaf3	NADH:ubiquinone oxidoreductase complex assembly factor 3 [Source:MGI Symbol;Acc:MGI:1913956]
ENSMUSG00000040485	66.1831	-1.34609	0.454526	-2.96153	0.00306111	0.031801	Lrrc52	leucine rich repeat containing 52 [Source:MGI Symbol;Acc:MGI:1924118]
ENSMUSG00000014791	66.0425	3.56566	0.525579	6.78425	1.17e-11	6.69e-10	Elmo3	engulfment and cell motility 3 [Source:MGI Symbol;Acc:MGI:2679007]
ENSMUSG00000058446	65.6581	2.30048	0.604411	3.80615	0.000141146	0.00237462	Znrf2	zinc and ring finger 2 [Source:MGI Symbol;Acc:MGI:1196246]
ENSMUSG00000025001	65.4108	-2.36915	0.741868	-3.1935	0.00140562	0.0170824	Hells	helicase, lymphoid specific [Source:MGI Symbol;Acc:MGI:106209]
ENSMUSG00000021877	65.3389	-3.44295	1.19936	-2.87066	0.00409615	0.039826	Arf4	ADP-ribosylation factor 4 [Source:MGI Symbol;Acc:MGI:99433]
ENSMUSG00000094483	65.2186	2.0819	0.597615	3.48368	0.000494568	0.00711741	Purb	purine rich element binding protein B [Source:MGI Symbol;Acc:MGI:1338779]
ENSMUSG00000005370	64.8549	-1.63752	0.537294	-3.04771	0.00230591	0.02547	Msh6	mutS homolog 6 [Source:MGI Symbol;Acc:MGI:1343961]
ENSMUSG00000052928	64.7508	5.67565	1.42423	3.98505	6.75e-05	0.00126314	Ctif	CBP80/20-dependent translation initiation factor [Source:MGI Symbol;Acc:MGI:2685518]
ENSMUSG00000007836	64.6088	2.21458	0.358584	6.17591	6.58e-10	3e-08	Hnrnpa0	heterogeneous nuclear ribonucleoprotein A0 [Source:MGI Symbol;Acc:MGI:1924384]
ENSMUSG00000021518	64.2568	1.5058	0.452779	3.32568	0.000882044	0.0116152	Ptdss1	phosphatidylserine synthase 1 [Source:MGI Symbol;Acc:MGI:1276575]
ENSMUSG00000041718	64.0244	-4.87123	1.65055	-2.95128	0.00316455	0.0326291	Alg13	asparagine-linked glycosylation 13 [Source:MGI Symbol;Acc:MGI:1914824]
ENSMUSG00000024773	63.8684	1.53835	0.523908	2.9363	0.00332149	0.0337684	Atg2a	autophagy related 2A [Source:MGI Symbol;Acc:MGI:1916291]
ENSMUSG00000052642	63.824	-1.53024	0.52497	-2.91492	0.00355784	0.0354099	Lypd9	LY6/PLAUR domain containing 9 [Source:MGI Symbol;Acc:MGI:2685370]
ENSMUSG00000027162	63.682	-2.37632	0.662599	-3.58636	0.00033532	0.00507273	Lin7c	lin-7 homolog C, crumbs cell polarity complex component [Source:MGI Symbol;Acc:MGI:1330839]
ENSMUSG00000024253	63.5846	-2.48117	0.551406	-4.49972	6.8e-06	0.000158074	Dync2li1	dynein cytoplasmic 2 light intermediate chain 1 [Source:MGI Symbol;Acc:MGI:1913996]
ENSMUSG00000021427	63.5795	-1.50073	0.448407	-3.3468	0.000817509	0.0109329	Ssr1	signal sequence receptor, alpha [Source:MGI Symbol;Acc:MGI:105082]
ENSMUSG00000010461	63.0742	5.97424	1.61908	3.6899	0.00022434	0.00355299	Eya4	EYA transcriptional coactivator and phosphatase 4 [Source:MGI Symbol;Acc:MGI:1337104]
ENSMUSG00000067274	62.9106	3.12698	0.604251	5.17496	2.28e-07	7e-06	Rplp0	ribosomal protein lateral stalk subunit P0 [Source:MGI Symbol;Acc:MGI:1927636]
ENSMUSG00000062300	62.8862	3.16404	0.539052	5.86964	4.37e-09	1.78e-07	Nectin2	nectin cell adhesion molecule 2 [Source:MGI Symbol;Acc:MGI:97822]
ENSMUSG00000026311	62.642	1.69211	0.410391	4.12316	3.74e-05	0.000742304	Asb1	ankyrin repeat and SOCS box-containing 1 [Source:MGI Symbol;Acc:MGI:1929735]
ENSMUSG00000001156	62.4705	1.7961	0.576771	3.11406	0.00184532	0.0214871	Mxd1	MAX dimerization protein 1 [Source:MGI Symbol;Acc:MGI:96908]
ENSMUSG00000036257	62.1605	3.4138	0.814511	4.19122	2.77e-05	0.000564157	Pnpla8	patatin-like phospholipase domain containing 8 [Source:MGI Symbol;Acc:MGI:1914702]
ENSMUSG00000049940	61.7774	1.78238	0.414477	4.30032	1.71e-05	0.000360753	Pgrmc2	progesterone receptor membrane component 2 [Source:MGI Symbol;Acc:MGI:1918054]
ENSMUSG00000041870	61.5412	2.09062	0.60023	3.48303	0.000495773	0.00712392	Ankrd13a	ankyrin repeat domain 13a [Source:MGI Symbol;Acc:MGI:1915670]
ENSMUSG00000068506	61.3883	-2.63692	0.524953	-5.02315	5.08e-07	1.48e-05	Gm5800	predicted gene 5800 [Source:MGI Symbol;Acc:MGI:3648769]
ENSMUSG00000000942	61.0253	2.84801	0.630057	4.52024	6.18e-06	0.000145402	Hoxa4	homeobox A4 [Source:MGI Symbol;Acc:MGI:96176]
ENSMUSG00000052911	60.8611	-1.4761	0.469369	-3.14486	0.00166164	0.0197372	Lamb2	laminin, beta 2 [Source:MGI Symbol;Acc:MGI:99916]
ENSMUSG00000009112	60.5568	2.8359	0.552742	5.13061	2.89e-07	8.7e-06	Bcl2l13	BCL2 like 13 [Source:MGI Symbol;Acc:MGI:2136959]
ENSMUSG00000038967	60.118	2.39543	0.459572	5.21231	1.87e-07	5.8e-06	Pdk2	pyruvate dehydrogenase kinase, isoenzyme 2 [Source:MGI Symbol;Acc:MGI:1343087]
ENSMUSG00000015083	59.7138	2.24313	0.47605	4.71196	2.45e-06	6.29e-05	C8g	complement component 8, gamma polypeptide [Source:MGI Symbol;Acc:MGI:88237]
ENSMUSG00000078611	59.4436	2.51654	0.753844	3.33828	0.000843002	0.0111946	Gm5901	predicted gene 5901 [Source:MGI Symbol;Acc:MGI:3643909]
ENSMUSG00000031651	59.3746	-1.68966	0.487561	-3.46554	0.000529172	0.00754468	Triml1	tripartite motif family-like 1 [Source:MGI Symbol;Acc:MGI:2687279]
ENSMUSG00000027180	58.6801	2.12011	0.484603	4.37494	1.21e-05	0.000264011	Fbxo3	F-box protein 3 [Source:MGI Symbol;Acc:MGI:1929084]
ENSMUSG00000028567	57.9233	-2.39425	0.67426	-3.55093	0.000383867	0.00571569	Txndc12	thioredoxin domain containing 12 (endoplasmic reticulum) [Source:MGI Symbol;Acc:MGI:1913323]
ENSMUSG00000074030	57.783	1.89658	0.546575	3.46993	0.00052059	0.00743531	Exoc8	exocyst complex component 8 [Source:MGI Symbol;Acc:MGI:2142527]
ENSMUSG00000022261	57.6452	1.81293	0.637052	2.84582	0.00442976	0.0423492	Sdc2	syndecan 2 [Source:MGI Symbol;Acc:MGI:1349165]
ENSMUSG00000020747	57.6397	2.68465	0.587228	4.57174	4.84e-06	0.000115487	Tmem94	transmembrane protein 94 [Source:MGI Symbol;Acc:MGI:1919197]
ENSMUSG00000010045	57.4322	1.62514	0.55554	2.92533	0.0034409	0.0345002	Tmem115	transmembrane protein 115 [Source:MGI Symbol;Acc:MGI:1930765]
ENSMUSG00000048445	57.402	3.04206	0.81042	3.75369	0.000174254	0.00285541	Ccdc57	coiled-coil domain containing 57 [Source:MGI Symbol;Acc:MGI:1918526]
ENSMUSG00000038412	56.9638	-2.04361	0.478668	-4.26937	1.96e-05	0.000411873	Higd1a	HIG1 domain family, member 1A [Source:MGI Symbol;Acc:MGI:1930666]
ENSMUSG00000033128	56.9396	1.69213	0.50141	3.37474	0.000738852	0.0100516	Gga1	golgi associated, gamma adaptin ear containing, ARF binding protein 1 [Source:MGI Symbol;Acc:MGI:2146207]
ENSMUSG00000020882	56.3503	2.40604	0.506346	4.75177	2.02e-06	5.27e-05	Cacnb1	calcium channel, voltage-dependent, beta 1 subunit [Source:MGI Symbol;Acc:MGI:102522]
ENSMUSG00000038010	56.1847	-1.42991	0.495778	-2.88417	0.00392443	0.0385311	Ccdc138	coiled-coil domain containing 138 [Source:MGI Symbol;Acc:MGI:1923388]
ENSMUSG00000005378	56.0824	-1.81831	0.533919	-3.40558	0.000660225	0.0090733	Bud23	BUD23, rRNA methyltransferase and ribosome maturation factor [Source:MGI Symbol;Acc:MGI:1913388]
ENSMUSG00000060376	56.0619	-1.51985	0.458155	-3.31732	0.000908841	0.0119162	Bckdha	branched chain ketoacid dehydrogenase E1, alpha polypeptide [Source:MGI Symbol;Acc:MGI:107701]
ENSMUSG00000002413	56.0148	2.17949	0.597738	3.64623	0.000266118	0.00413839	Braf	Braf transforming gene [Source:MGI Symbol;Acc:MGI:88190]
ENSMUSG00000029536	55.654	1.53384	0.45039	3.40559	0.000660219	0.0090733	Gatc	glutamyl-tRNA amidotransferase subunit C [Source:MGI Symbol;Acc:MGI:1923776]
ENSMUSG00000023938	55.5991	3.41279	0.717285	4.75793	1.96e-06	5.17e-05	Aars2	alanyl-tRNA synthetase 2, mitochondrial [Source:MGI Symbol;Acc:MGI:2681839]
ENSMUSG00000056962	55.2367	4.48417	1.53619	2.91902	0.00351133	0.0350576	Jmjd6	jumonji domain containing 6 [Source:MGI Symbol;Acc:MGI:1858910]
ENSMUSG00000024042	55.2276	4.26629	0.656425	6.49927	8.07e-11	4.14e-09	Sik1	salt inducible kinase 1 [Source:MGI Symbol;Acc:MGI:104754]
ENSMUSG00000044328	54.9245	-1.82339	0.556345	-3.27744	0.00104752	0.0134204	Trp53i13	transformation related protein 53 inducible protein 13 [Source:MGI Symbol;Acc:MGI:1915125]
ENSMUSG00000055943	54.4962	-1.51792	0.508194	-2.98688	0.00281839	0.0298743	Emc7	ER membrane protein complex subunit 7 [Source:MGI Symbol;Acc:MGI:1920274]
ENSMUSG00000029875	54.2566	-3.70209	1.22815	-3.01435	0.00257529	0.0278597	Ccdc184	coiled-coil domain containing 184 [Source:MGI Symbol;Acc:MGI:2146066]
ENSMUSG00000038500	54.1556	3.04937	0.670434	4.54835	5.41e-06	0.000128446	Prr3	proline-rich polypeptide 3 [Source:MGI Symbol;Acc:MGI:1922460]
ENSMUSG00000010392	54.1365	-1.99934	0.567034	-3.52596	0.000421954	0.00621429	Gosr1	golgi SNAP receptor complex member 1 [Source:MGI Symbol;Acc:MGI:1858260]
ENSMUSG00000027692	53.9552	6.92241	0.879341	7.87227	3.48e-15	2.79e-13	Tnik	TRAF2 and NCK interacting kinase [Source:MGI Symbol;Acc:MGI:1916264]
ENSMUSG00000109228	53.7548	1.74345	0.39119	4.4568	8.32e-06	0.000189537	Fam81b	family with sequence similarity 81, member B [Source:MGI Symbol;Acc:MGI:2685122]
ENSMUSG00000049694	53.6346	2.32011	0.742731	3.12376	0.00178556	0.0209981	BC048671	cDNA sequence BC048671 [Source:MGI Symbol;Acc:MGI:2679261]
ENSMUSG00000027787	53.5966	-2.66139	0.804084	-3.30984	0.000933486	0.0121739	Nmd3	NMD3 ribosome export adaptor [Source:MGI Symbol;Acc:MGI:2140103]
ENSMUSG00000074406	53.3202	4.80938	0.569027	8.45195	2.86e-17	2.88e-15	Zfp628	zinc finger protein 628 [Source:MGI Symbol;Acc:MGI:2665174]
ENSMUSG00000055932	53.0274	1.3824	0.392876	3.51867	0.000433715	0.00634795	Fto	FTO alpha-ketoglutarate dependent dioxygenase [Source:MGI Symbol;Acc:MGI:1347093]
ENSMUSG00000022798	52.784	3.38493	0.988659	3.42375	0.000617624	0.00857509	Tex55	testis expressed 55 [Source:MGI Symbol;Acc:MGI:1921913]
ENSMUSG00000023009	52.5762	3.77433	1.01212	3.72914	0.000192133	0.00310994	Nckap5l	NCK-associated protein 5-like [Source:MGI Symbol;Acc:MGI:3609653]
ENSMUSG00000044556	52.2835	-2.00832	0.686515	-2.92539	0.00344024	0.0345002	Tex38	testis expressed 38 [Source:MGI Symbol;Acc:MGI:1922423]
ENSMUSG00000027133	52.2176	-1.56917	0.560366	-2.80026	0.00510618	0.0474719	Nop10	NOP10 ribonucleoprotein [Source:MGI Symbol;Acc:MGI:1913431]
ENSMUSG00000036002	51.6456	4.85728	1.73521	2.79924	0.00512225	0.0475746	Atosb	atos homolog B [Source:MGI Symbol;Acc:MGI:2441854]
ENSMUSG00000078320	51.6375	1.7572	0.479083	3.66785	0.000244603	0.003829	Tex13c1	TEX13 family member C1 [Source:MGI Symbol;Acc:MGI:2685208]
ENSMUSG00000036551	51.4737	-2.58709	0.689518	-3.75203	0.000175407	0.00285959	Akap14	A kinase anchor protein 14 [Source:MGI Symbol;Acc:MGI:3618288]
ENSMUSG00000040738	51.2673	-1.64224	0.532672	-3.08302	0.0020491	0.023484	Ints8	integrator complex subunit 8 [Source:MGI Symbol;Acc:MGI:1919906]
ENSMUSG00000019699	51.213	1.7566	0.53118	3.30697	0.000943098	0.0122723	Akt3	thymoma viral proto-oncogene 3 [Source:MGI Symbol;Acc:MGI:1345147]
ENSMUSG00000030447	50.8129	2.44686	0.761993	3.21114	0.00132212	0.0162769	Cyfip1	cytoplasmic FMR1 interacting protein 1 [Source:MGI Symbol;Acc:MGI:1338801]
ENSMUSG00000028617	49.5617	-1.86962	0.61239	-3.05299	0.00226576	0.0251147	Lrrc42	leucine rich repeat containing 42 [Source:MGI Symbol;Acc:MGI:1925059]
ENSMUSG00000041556	48.9894	2.58881	0.558567	4.63474	3.57e-06	8.87e-05	Fbxo2	F-box protein 2 [Source:MGI Symbol;Acc:MGI:2446216]
ENSMUSG00000038855	48.5298	2.96229	1.03132	2.87233	0.0040746	0.0396759	Itpkb	inositol 1,4,5-trisphosphate 3-kinase B [Source:MGI Symbol;Acc:MGI:109235]
ENSMUSG00000022554	48.2314	1.71045	0.571741	2.99164	0.00277479	0.0294782	Hgh1	HGH1 homolog [Source:MGI Symbol;Acc:MGI:1930628]
ENSMUSG00000067438	48.1097	3.42412	0.52689	6.49873	8.1e-11	4.14e-09	Hmx1	H6 homeobox 1 [Source:MGI Symbol;Acc:MGI:107178]
ENSMUSG00000047787	47.7787	5.73531	1.50462	3.8118	0.000137961	0.00232932	Flrt1	fibronectin leucine rich transmembrane protein 1 [Source:MGI Symbol;Acc:MGI:3026647]
ENSMUSG00000006356	47.7648	2.49947	0.604485	4.13487	3.55e-05	0.000712624	Crip2	cysteine rich protein 2 [Source:MGI Symbol;Acc:MGI:1915587]
ENSMUSG00000027784	47.0929	3.65792	0.951263	3.84533	0.000120389	0.00209628	Ppm1l	protein phosphatase 1 (formerly 2C)-like [Source:MGI Symbol;Acc:MGI:2139740]
ENSMUSG00000014786	46.1493	1.94909	0.575924	3.38429	0.000713632	0.00975057	Slc9a5	solute carrier family 9 (sodium/hydrogen exchanger), member 5 [Source:MGI Symbol;Acc:MGI:2685542]
ENSMUSG00000043415	45.9476	1.8551	0.491587	3.7737	0.000160846	0.00265874	Otud1	OTU domain containing 1 [Source:MGI Symbol;Acc:MGI:1918448]
ENSMUSG00000040163	45.9031	2.94632	0.802564	3.67113	0.000241479	0.00379895	1700034J05Rik	RIKEN cDNA 1700034J05 gene [Source:MGI Symbol;Acc:MGI:1920594]
ENSMUSG00000002748	45.5756	-1.49679	0.513944	-2.91236	0.00358704	0.0356629	Baz1b	bromodomain adjacent to zinc finger domain, 1B [Source:MGI Symbol;Acc:MGI:1353499]
ENSMUSG00000005131	45.2361	-5.14323	1.40476	-3.66129	0.000250953	0.00392192	4930550C14Rik	RIKEN cDNA 4930550C14 gene [Source:MGI Symbol;Acc:MGI:1922561]
ENSMUSG00000000001	45.0775	-1.56407	0.560864	-2.78868	0.00529238	0.0489144	Gnai3	G protein subunit alpha i3 [Source:MGI Symbol;Acc:MGI:95773]
ENSMUSG00000079357	44.9384	5.01827	1.53092	3.27794	0.00104568	0.0134151	Gm11100	predicted gene 11100 [Source:MGI Symbol;Acc:MGI:3779338]
ENSMUSG00000043683	44.8654	2.05861	0.735145	2.80028	0.00510581	0.0474719	Fem1a	fem 1 homolog a [Source:MGI Symbol;Acc:MGI:1335089]
ENSMUSG00000048787	44.8178	3.02024	0.532214	5.67486	1.39e-08	5.29e-07	Dcun1d3	defective in cullin neddylation 1 domain containing 3 [Source:MGI Symbol;Acc:MGI:2679003]
ENSMUSG00000060985	44.7579	4.67876	1.65724	2.82323	0.00475422	0.0449961	Tdrd5	tudor domain containing 5 [Source:MGI Symbol;Acc:MGI:2684949]
ENSMUSG00000023000	44.1949	5.63777	1.42402	3.95905	7.52e-05	0.0013896	Dhh	desert hedgehog [Source:MGI Symbol;Acc:MGI:94891]
ENSMUSG00000053414	43.5044	6.34754	1.61037	3.94167	8.09e-05	0.00147694	Hunk	hormonally upregulated Neu-associated kinase [Source:MGI Symbol;Acc:MGI:1347352]
ENSMUSG00000042029	43.4382	-1.86213	0.56227	-3.3118	0.000926964	0.0121223	Ncapg2	non-SMC condensin II complex, subunit G2 [Source:MGI Symbol;Acc:MGI:1923294]
ENSMUSG00000032968	43.179	3.17372	0.842855	3.76544	0.000166255	0.00273381	Inha	inhibin alpha [Source:MGI Symbol;Acc:MGI:96569]
ENSMUSG00000056692	43.167	2.92674	0.885242	3.30615	0.000945888	0.0122849	Ilrun	inflammation and lipid regulator with UBA-like and NBR1-like domains [Source:MGI Symbol;Acc:MGI:106281]
ENSMUSG00000021556	43.0602	2.99029	1.00507	2.97521	0.00292791	0.0307593	Golm1	golgi membrane protein 1 [Source:MGI Symbol;Acc:MGI:1917329]
ENSMUSG00000049577	42.9084	2.48112	0.5208	4.76406	1.9e-06	5.04e-05	Zfpm1	zinc finger protein, multitype 1 [Source:MGI Symbol;Acc:MGI:1095400]
ENSMUSG00000021981	42.8106	-2.16971	0.666682	-3.25449	0.00113595	0.0142635	Cab39l	calcium binding protein 39-like [Source:MGI Symbol;Acc:MGI:1914081]
ENSMUSG00000093668	42.4067	2.22276	0.537929	4.13206	3.6e-05	0.000718662	Pou5f2	POU domain class 5, transcription factor 2 [Source:MGI Symbol;Acc:MGI:1922757]
ENSMUSG00000049692	42.37	7.02744	1.34139	5.23892	1.62e-07	5.09e-06	Tmem239	transmembrane 239 [Source:MGI Symbol;Acc:MGI:1914016]
ENSMUSG00000090141	42.3309	5.85191	1.95158	2.99854	0.00271273	0.0290804	Gm614	predicted gene 614 [Source:MGI Symbol;Acc:MGI:2685460]
ENSMUSG00000038806	42.288	-1.75027	0.624472	-2.8028	0.0050661	0.0471921	Sde2	SDE2 telomere maintenance homolog (S. pombe) [Source:MGI Symbol;Acc:MGI:2384788]
ENSMUSG00000028701	42.1943	-2.50895	0.655661	-3.82659	0.00012993	0.00221748	Lurap1	leucine rich adaptor protein 1 [Source:MGI Symbol;Acc:MGI:1915325]
ENSMUSG00000041406	42.1867	-2.47008	0.654956	-3.77138	0.00016235	0.00267425	Firrm	FIGNL1 interacting regulator of recombination and mitosis [Source:MGI Symbol;Acc:MGI:3590554]
ENSMUSG00000024900	41.887	2.49353	0.751236	3.31924	0.000902637	0.0118699	Cpt1a	carnitine palmitoyltransferase 1a, liver [Source:MGI Symbol;Acc:MGI:1098296]
ENSMUSG00000029622	41.8056	3.0867	0.915418	3.3719	0.000746506	0.0101411	Arpc1b	actin related protein 2/3 complex, subunit 1B [Source:MGI Symbol;Acc:MGI:1343142]
ENSMUSG00000005575	41.6505	2.60717	0.838128	3.11071	0.0018664	0.0216525	Ube2m	ubiquitin-conjugating enzyme E2M [Source:MGI Symbol;Acc:MGI:108278]
ENSMUSG00000084782	41.2433	2.68647	0.742224	3.61949	0.000295185	0.00454555	Tex53	testis expressed 53 [Source:MGI Symbol;Acc:MGI:3701774]
ENSMUSG00000020889	40.8208	-1.50892	0.542383	-2.78202	0.00540209	0.0497825	Nr1d1	nuclear receptor subfamily 1, group D, member 1 [Source:MGI Symbol;Acc:MGI:2444210]
ENSMUSG00000024068	40.7656	1.97918	0.663185	2.98435	0.00284178	0.0300548	Spast	spastin [Source:MGI Symbol;Acc:MGI:1858896]
ENSMUSG00000014747	40.5995	4.21975	0.734002	5.74897	8.98e-09	3.52e-07	Ankrd53	ankyrin repeat domain 53 [Source:MGI Symbol;Acc:MGI:1922555]
ENSMUSG00000024780	40.324	3.09791	0.964494	3.21195	0.00131835	0.0162729	Cdc37l1	cell division cycle 37-like 1 [Source:MGI Symbol;Acc:MGI:1914322]
ENSMUSG00000006705	40.2678	1.65652	0.524652	3.15737	0.00159201	0.0190056	Pknox1	Pbx/knotted 1 homeobox [Source:MGI Symbol;Acc:MGI:1201409]
ENSMUSG00000050428	40.1352	3.76274	0.833615	4.51377	6.37e-06	0.000148493	Fbxo46	F-box protein 46 [Source:MGI Symbol;Acc:MGI:2444918]
ENSMUSG00000021536	39.8656	5.83601	1.56513	3.72877	0.000192418	0.00310994	Adcy2	adenylate cyclase 2 [Source:MGI Symbol;Acc:MGI:99676]
ENSMUSG00000027822	39.7682	-3.85503	0.892254	-4.32055	1.56e-05	0.000331434	Slc33a1	solute carrier family 33 (acetyl-CoA transporter), member 1 [Source:MGI Symbol;Acc:MGI:1332247]
ENSMUSG00000019362	39.7382	-2.23201	0.512999	-4.35091	1.36e-05	0.000294001	D8Ertd738e	DNA segment, Chr 8, ERATO Doi 738, expressed [Source:MGI Symbol;Acc:MGI:1289231]
ENSMUSG00000000149	39.5811	4.61467	0.975094	4.73254	2.22e-06	5.76e-05	Gna12	guanine nucleotide binding protein, alpha 12 [Source:MGI Symbol;Acc:MGI:95767]
ENSMUSG00000015745	39.5013	5.34009	1.68261	3.1737	0.0015051	0.0180822	Plekho1	pleckstrin homology domain containing, family O member 1 [Source:MGI Symbol;Acc:MGI:1914470]
ENSMUSG00000060565	39.2386	-4.13789	1.34704	-3.07183	0.00212751	0.0240359	Gm5591	predicted gene 5591 [Source:MGI Symbol;Acc:MGI:3648692]
ENSMUSG00000045176	38.483	2.9642	0.538174	5.50787	3.63e-08	1.28e-06	Borcs6	BLOC-1 related complex subunit 6 [Source:MGI Symbol;Acc:MGI:1919173]
ENSMUSG00000031533	38.1262	-3.97687	1.25216	-3.17601	0.00149316	0.0180074	Mrps31	mitochondrial ribosomal protein S31 [Source:MGI Symbol;Acc:MGI:1913153]
ENSMUSG00000063689	38.1225	1.69993	0.597449	2.84532	0.00443675	0.0423732	H2ac21	H2A clustered histone 21 [Source:MGI Symbol;Acc:MGI:2448314]
ENSMUSG00000021986	38.0865	3.09046	0.915283	3.37651	0.000734128	0.0100017	Amer2	APC membrane recruitment 2 [Source:MGI Symbol;Acc:MGI:1919375]
ENSMUSG00000069633	38.0219	-1.77752	0.605106	-2.93754	0.00330825	0.0337427	Pex11g	peroxisomal biogenesis factor 11 gamma [Source:MGI Symbol;Acc:MGI:1920905]
ENSMUSG00000037971	37.9211	2.48336	0.698618	3.55468	0.000378441	0.00564378	Cfap68	cilia and flagella associated protein 68 [Source:MGI Symbol;Acc:MGI:1915971]
ENSMUSG00000030214	37.697	1.45405	0.520548	2.79331	0.00521716	0.0483136	Plbd1	phospholipase B domain containing 1 [Source:MGI Symbol;Acc:MGI:1914107]
ENSMUSG00000069044	37.0525	-2.4954	0.61581	-4.05222	5.07e-05	0.000987615	Usp9y	ubiquitin specific peptidase 9, Y chromosome [Source:MGI Symbol;Acc:MGI:1313274]
ENSMUSG00000007682	36.882	4.93993	1.32077	3.74019	0.000183881	0.00298728	Dio2	deiodinase, iodothyronine, type II [Source:MGI Symbol;Acc:MGI:1338833]
ENSMUSG00000037710	36.5072	-2.12363	0.59957	-3.54193	0.000397216	0.00587769	Cisd1	CDGSH iron sulfur domain 1 [Source:MGI Symbol;Acc:MGI:1261855]
ENSMUSG00000038976	36.1376	2.32537	0.536913	4.33101	1.48e-05	0.000319677	Ppp1r9b	protein phosphatase 1, regulatory subunit 9B [Source:MGI Symbol;Acc:MGI:2387581]
ENSMUSG00000044934	36.0456	3.76218	0.811968	4.6334	3.6e-06	8.9e-05	Zfp367	zinc finger protein 367 [Source:MGI Symbol;Acc:MGI:2442266]
ENSMUSG00000026753	35.8342	-4.34455	1.52237	-2.85381	0.00431979	0.0415499	Ppp6c	protein phosphatase 6, catalytic subunit [Source:MGI Symbol;Acc:MGI:1915107]
ENSMUSG00000090291	35.416	3.964	1.01882	3.89078	9.99e-05	0.00178593	Lrrc10b	leucine rich repeat containing 10B [Source:MGI Symbol;Acc:MGI:2685551]
ENSMUSG00000045435	35.1036	5.76448	0.836723	6.88935	5.6e-12	3.42e-10	Tmem60	transmembrane protein 60 [Source:MGI Symbol;Acc:MGI:2673965]
ENSMUSG00000018848	35.0976	-2.63208	0.859965	-3.06068	0.00220833	0.0247097	Rars1	arginyl-tRNA synthetase 1 [Source:MGI Symbol;Acc:MGI:1914297]
ENSMUSG00000031179	34.6346	-2.72298	0.618279	-4.40413	1.06e-05	0.000235731	Magea9	MAGE family member A9 [Source:MGI Symbol;Acc:MGI:1917946]
ENSMUSG00000008398	34.6126	4.79808	0.830593	5.77669	7.62e-09	3.01e-07	Elk3	ELK3, member of ETS oncogene family [Source:MGI Symbol;Acc:MGI:101762]
ENSMUSG00000027342	34.1715	-2.14711	0.626127	-3.42919	0.000605381	0.00842987	Pcna	proliferating cell nuclear antigen [Source:MGI Symbol;Acc:MGI:97503]
ENSMUSG00000034330	34.1618	2.37808	0.699925	3.39762	0.000679756	0.00931462	Plcg2	phospholipase C, gamma 2 [Source:MGI Symbol;Acc:MGI:97616]
ENSMUSG00000000339	34.1564	2.42205	0.8252	2.93511	0.00333433	0.0338626	Rtca	RNA 3'-terminal phosphate cyclase [Source:MGI Symbol;Acc:MGI:1913618]
ENSMUSG00000031906	34.0777	2.25832	0.541905	4.16738	3.08e-05	0.000623836	Smpd3	sphingomyelin phosphodiesterase 3, neutral [Source:MGI Symbol;Acc:MGI:1927578]
ENSMUSG00000021133	34.012	2.35364	0.70919	3.31878	0.000904126	0.0118729	Susd6	sushi domain containing 6 [Source:MGI Symbol;Acc:MGI:2444661]
ENSMUSG00000028467	33.6439	3.45629	1.13016	3.05824	0.00222643	0.0248173	Gba2	glucosidase beta 2 [Source:MGI Symbol;Acc:MGI:2654325]
ENSMUSG00000103310	33.5794	2.41712	0.573724	4.21304	2.52e-05	0.000520148	Pcdha12	protocadherin alpha 12 [Source:MGI Symbol;Acc:MGI:1298370]
ENSMUSG00000098678	32.8407	3.76299	0.78177	4.81342	1.48e-06	4.02e-05	Mroh6	maestro heat-like repeat family member 6 [Source:MGI Symbol;Acc:MGI:5011755]
ENSMUSG00000021713	32.7063	-2.07696	0.630174	-3.29584	0.000981271	0.0126747	Ppwd1	peptidylprolyl isomerase domain and WD repeat containing 1 [Source:MGI Symbol;Acc:MGI:2443069]
ENSMUSG00000020038	32.5245	1.73623	0.542742	3.19899	0.00137909	0.0168249	Cry1	cryptochrome circadian regulator 1 [Source:MGI Symbol;Acc:MGI:1270841]
ENSMUSG00000068196	32.3231	8.23712	1.60294	5.13875	2.77e-07	8.38e-06	Col8a1	collagen, type VIII, alpha 1 [Source:MGI Symbol;Acc:MGI:88463]
ENSMUSG00000040209	32.2465	2.71976	0.549428	4.95016	7.42e-07	2.09e-05	Zfp704	zinc finger protein 704 [Source:MGI Symbol;Acc:MGI:2180715]
ENSMUSG00000028251	32.087	3.25073	1.06661	3.04772	0.00230585	0.02547	Tstd3	thiosulfate sulfurtransferase (rhodanese)-like domain containing 3 [Source:MGI Symbol;Acc:MGI:1924282]
ENSMUSG00000054519	31.9526	-2.4239	0.84875	-2.85585	0.0042922	0.0414109	Zfp867	zinc finger protein 867 [Source:MGI Symbol;Acc:MGI:2681848]
ENSMUSG00000103906	31.7508	2.9094	0.634043	4.58865	4.46e-06	0.000107328	Tigd5	tigger transposable element derived 5 [Source:MGI Symbol;Acc:MGI:2145902]
ENSMUSG00000023932	31.466	-2.30162	0.722595	-3.18522	0.00144645	0.0175336	Cdc5l	cell division cycle 5-like [Source:MGI Symbol;Acc:MGI:1918952]
ENSMUSG00000064288	31.4437	-2.99186	0.915798	-3.26694	0.00108716	0.0137738	H4c12	H4 clustered histone 12 [Source:MGI Symbol;Acc:MGI:2448439]
ENSMUSG00000028609	31.3255	-3.72424	1.18579	-3.14074	0.00168524	0.0199674	Magoh	mago homolog, exon junction complex core component [Source:MGI Symbol;Acc:MGI:1330312]
ENSMUSG00000047945	31.3182	1.89451	0.63618	2.97795	0.00290183	0.0305533	Marcksl1	MARCKS-like 1 [Source:MGI Symbol;Acc:MGI:97143]
ENSMUSG00000017485	31.3037	-2.26065	0.693821	-3.25827	0.00112095	0.0141503	Top2b	topoisomerase (DNA) II beta [Source:MGI Symbol;Acc:MGI:98791]
ENSMUSG00000017146	31.2736	-2.96503	0.782882	-3.78733	0.000152275	0.0025259	Brca1	breast cancer 1, early onset [Source:MGI Symbol;Acc:MGI:104537]
ENSMUSG00000034139	30.9834	5.71136	1.8704	3.05355	0.00226149	0.0250967	Serpini2	serine (or cysteine) peptidase inhibitor, clade I, member 2 [Source:MGI Symbol;Acc:MGI:1915181]
ENSMUSG00000014859	30.9095	2.49369	0.811898	3.07144	0.00213031	0.0240359	E2f4	E2F transcription factor 4 [Source:MGI Symbol;Acc:MGI:103012]
ENSMUSG00000029647	30.5057	2.93634	0.83331	3.52371	0.000425554	0.00623849	Pan3	PAN3 poly(A) specific ribonuclease subunit [Source:MGI Symbol;Acc:MGI:1919837]
ENSMUSG00000070923	30.2746	1.88337	0.626602	3.00569	0.00264983	0.0285184	Klhl9	kelch-like 9 [Source:MGI Symbol;Acc:MGI:2180122]
ENSMUSG00000090505	29.7194	-3.96404	0.988028	-4.01207	6.02e-05	0.00114046	Gm3486	predicted gene 3486 [Source:MGI Symbol;Acc:MGI:3781663]
ENSMUSG00000021486	29.6809	3.88493	1.28073	3.03336	0.00241843	0.0263608	Prelid1	PRELI domain containing 1 [Source:MGI Symbol;Acc:MGI:1913744]
ENSMUSG00000054385	29.641	3.61459	0.703591	5.13735	2.79e-07	8.42e-06	Ceacam2	CEA cell adhesion molecule 2 [Source:MGI Symbol;Acc:MGI:1347246]
ENSMUSG00000031974	29.3645	3.8438	1.31638	2.91997	0.00350061	0.0349876	Abcb10	ATP-binding cassette, sub-family B member 10 [Source:MGI Symbol;Acc:MGI:1860508]
[truncated: 39 more rows]
