# Supplementary material for: Targeted mRNP-phagy licenses translational activation during cellular metamorphosis
Source: Research Square preprint supplement (doi:10.21203/rs.3.rs-6289188/v1), 2025-05-06
Supplement: Supplementary file 11 [file c96800c4edea14d36853a300.xlsx]

## Sheet: proteinGroups
Protein IDs	Majority protein IDs	Peptide counts (all)	Peptide counts (razor+unique)	Peptide counts (unique)	Protein names	Gene names	Fasta headers	Number of proteins	Peptides	Razor + unique peptides	Unique peptides	Peptides NC_rep1	Peptides NC_rep2	Peptides NC_rep3	Peptides SPEM1_rep1	Peptides SPEM1_rep2	Peptides SPEM1_rep3	Peptides TNP1_rep1	Peptides TNP1_rep2	Peptides TNP1_rep3	Razor + unique peptides NC_rep1	Razor + unique peptides NC_rep2	Razor + unique peptides NC_rep3	Razor + unique peptides SPEM1_rep1	Razor + unique peptides SPEM1_rep2	Razor + unique peptides SPEM1_rep3	Razor + unique peptides TNP1_rep1	Razor + unique peptides TNP1_rep2	Razor + unique peptides TNP1_rep3	Unique peptides NC_rep1	Unique peptides NC_rep2	Unique peptides NC_rep3	Unique peptides SPEM1_rep1	Unique peptides SPEM1_rep2	Unique peptides SPEM1_rep3	Unique peptides TNP1_rep1	Unique peptides TNP1_rep2	Unique peptides TNP1_rep3	Sequence coverage [%]	Unique + razor sequence coverage [%]	Unique sequence coverage [%]	Mol. weight [kDa]	Sequence length	Sequence lengths	Q-value	Score	Sequence coverage NC_rep1 [%]	Sequence coverage NC_rep2 [%]	Sequence coverage NC_rep3 [%]
A0A075B6A0;A0A075B5P6;P01872	A0A075B6A0;A0A075B5P6;P01872	3;3;3	3;3;3	3;3;3	Ig mu chain C region	Ighm	tr|A0A075B6A0|A0A075B6A0_MOUSE Immunoglobulin heavy constant mu (Fragment) OS=Mus musculus OX=10090 GN=Ighm PE=1 SV=2;tr|A0A075B5P6|A0A075B5P6_MOUSE Immunoglobulin heavy constant mu (Fragment) OS=Mus musculus OX=10090 GN=Ighm PE=1 SV=1;sp|P01872|IGHM_MOUSE	3	3	3	3	0	0	0	2	0	0	1	3	2	0	0	0	2	0	0	1	3	2	0	0	0	2	0	0	1	3	2	8.2	8.2	8.2	52.498	476	476;455;454	0	6.5074	0	0	0
A0A075B668;Q9QUG3	A0A075B668;Q9QUG3	3;3	3;3	3;3	Prion-like protein doppel	Gm28045;Prnd	tr|A0A075B668|A0A075B668_MOUSE Prion protein readthrough transcript OS=Mus musculus OX=10090 GN=Prn PE=3 SV=1;sp|Q9QUG3|PRND_MOUSE Prion-like protein doppel OS=Mus musculus OX=10090 GN=Prnd PE=1 SV=1	2	3	3	3	0	2	0	0	0	0	1	0	0	0	2	0	0	0	0	1	0	0	0	2	0	0	0	0	1	0	0	14.7	14.7	14.7	22.58	197	197;179	0.0041511	1.8242	0	10.7	0
A0A087WS59;A0A087WSQ1;A0A087WNM1;Q91Z67;A0A087WS73	A0A087WS59;A0A087WSQ1;A0A087WNM1;Q91Z67	4;4;4;4;1	4;4;4;4;1	4;4;4;4;1	SLIT-ROBO Rho GTPase-activating protein 2	Srgap2	tr|A0A087WS59|A0A087WS59_MOUSE SLIT-ROBO Rho GTPase activating protein 2 (Fragment) OS=Mus musculus OX=10090 GN=Srgap2 PE=1 SV=1;tr|A0A087WSQ1|A0A087WSQ1_MOUSE SLIT-ROBO Rho GTPase activating protein 2 (Fragment) OS=Mus musculus OX=10090 GN=Srgap2 PE=1 SV=	5	4	4	4	0	0	0	0	0	1	4	2	2	0	0	0	0	0	1	4	2	2	0	0	0	0	0	1	4	2	2	10.9	10.9	10.9	50.78	451	451;649;858;1071;267	0	4.8948	0	0	0
A0A087WNP6;Q4VAA2;F8WGL9;A0A087WS49;A0A087WRM0	A0A087WNP6;Q4VAA2	3;3;1;1;1	3;3;1;1;1	3;3;1;1;1	Protein CDV3	Cdv3	tr|A0A087WNP6|A0A087WNP6_MOUSE Carnitine deficiency-associated gene expressed in ventricle 3 OS=Mus musculus OX=10090 GN=Cdv3 PE=1 SV=1;sp|Q4VAA2|CDV3_MOUSE Protein CDV3 OS=Mus musculus OX=10090 GN=Cdv3 PE=1 SV=2	5	3	3	3	1	0	1	0	1	0	2	3	1	1	0	1	0	1	0	2	3	1	1	0	1	0	1	0	2	3	1	26	26	26	24.196	235	235;281;109;154;154	0	12.451	12.8	0	12.8
A0A087WPE4;A0A087WQE6;A0A087WNT1;P83940	A0A087WPE4;A0A087WQE6;A0A087WNT1;P83940	2;2;2;2	2;2;2;2	2;2;2;2	Transcription elongation factor B polypeptide 1	Tceb1	tr|A0A087WPE4|A0A087WPE4_MOUSE Elongin C (Fragment) OS=Mus musculus OX=10090 GN=Eloc PE=1 SV=1;tr|A0A087WQE6|A0A087WQE6_MOUSE Elongin-C (Fragment) OS=Mus musculus OX=10090 GN=Eloc PE=1 SV=1;tr|A0A087WNT1|A0A087WNT1_MOUSE Elongin-C OS=Mus musculus OX=10090	4	2	2	2	2	1	2	2	2	2	2	2	1	2	1	2	2	2	2	2	2	1	2	1	2	2	2	2	2	2	1	45.1	45.1	45.1	5.4431	51	51;95;134;112	0	5.7621	45.1	19.6	45.1
A0A087WNU1;A0A087WPM0;Q3UQA7	A0A087WNU1;A0A087WPM0;Q3UQA7	1;1;1	1;1;1	1;1;1	Selenoprotein H	2700094K13Rik;Selh	tr|A0A087WNU1|A0A087WNU1_MOUSE Selenoprotein H OS=Mus musculus OX=10090 GN=Selenoh PE=1 SV=1;tr|A0A087WPM0|A0A087WPM0_MOUSE Selenoprotein H OS=Mus musculus OX=10090 GN=Selenoh PE=1 SV=1;sp|Q3UQA7|SELH_MOUSE Selenoprotein H OS=Mus musculus OX=10090 GN=Selen	3	1	1	1	0	0	0	0	0	0	0	0	1	0	0	0	0	0	0	0	0	1	0	0	0	0	0	0	0	0	1	25.7	25.7	25.7	11.169	101	101;123;116	0.0033798	1.9714	0	0	0
Q80TV8;A0A087WQF1;E9QKH0;A0A087WRE8;E9QNY9;A0A087WP42;A0A087WRK0;A0A087WNW8;A0A087WQ95;A0A087WS18;J3QP81;E9Q6L0;A0A0A6YXZ1;A0A087WQ31;A0A0A6YWK1;A0A0N4SUT7;A0A0N4SVH2	Q80TV8;A0A087WQF1;E9QKH0;A0A087WRE8;E9QNY9;A0A087WP42;A0A087WRK0;A0A087WNW8;A0A087WQ95;A0A087WS18;J3QP81;E9Q6L0;A0A0A6YXZ1;A0A087WQ31;A0A0A6YWK1	6;6;6;6;6;6;6;6;6;6;6;6;6;6;3;1;1	6;6;6;6;6;6;6;6;6;6;6;6;6;6;3;1;1	4;4;4;4;4;4;4;4;4;4;4;4;4;4;3;0;1	CLIP-associating protein 1	Clasp1	sp|Q80TV8|CLAP1_MOUSE CLIP-associating protein 1 OS=Mus musculus OX=10090 GN=Clasp1 PE=1 SV=2;tr|A0A087WQF1|A0A087WQF1_MOUSE CLIP associating protein 1 OS=Mus musculus OX=10090 GN=Clasp1 PE=1 SV=2;tr|E9QKH0|E9QKH0_MOUSE CLIP associating protein 1 OS=Mus mu	17	6	6	4	0	0	0	3	3	2	2	4	3	0	0	0	3	3	2	2	4	3	0	0	0	1	1	0	0	2	1	6	6	4	169.23	1535	1535;1468;1536;1526;1526;1492;1477;1475;1469;1460;1459;1452;1244;1552;345;285;177	0	26.385	0	0	0
A0A087WP92;A0A087WQ02	A0A087WP92;A0A087WQ02	7;6	1;1	1;1		Trip12	tr|A0A087WP92|A0A087WP92_MOUSE Thyroid hormone receptor interactor 12 (Fragment) OS=Mus musculus OX=10090 GN=Trip12 PE=1 SV=1;tr|A0A087WQ02|A0A087WQ02_MOUSE Thyroid hormone receptor interactor 12 OS=Mus musculus OX=10090 GN=Trip12 PE=1 SV=1	2	7	1	1	0	0	0	3	3	2	7	6	7	0	0	0	0	0	0	1	1	1	0	0	0	0	0	0	1	1	1	21.5	2.6	2.6	44.869	423	423;346	0	4.9204	0	0	0
A0A087WQA4;A0A0A6YXI6;A0A087WPL3;A0A087WQ61;A0A087WQU0;Q8C134;Q9ERD6	A0A087WQA4;A0A0A6YXI6;A0A087WPL3;A0A087WQ61;A0A087WQU0;Q8C134;Q9ERD6	1;1;1;1;1;1;1	1;1;1;1;1;1;1	1;1;1;1;1;1;1	Ras-specific guanine nucleotide-releasing factor RalGPS2	Ralgps2	tr|A0A087WQA4|A0A087WQA4_MOUSE Ral GEF with PH domain and SH3 binding motif 2 (Fragment) OS=Mus musculus OX=10090 GN=Ralgps2 PE=1 SV=1;tr|A0A0A6YXI6|A0A0A6YXI6_MOUSE Ral GEF with PH domain and SH3 binding motif 2 OS=Mus musculus OX=10090 GN=Ralgps2 PE=1 SV	7	1	1	1	0	0	0	0	0	1	1	1	1	0	0	0	0	0	1	1	1	1	0	0	0	0	0	1	1	1	1	16.4	16.4	16.4	7.13	67	67;78;128;463;489;523;590	0.0098155	1.4724	0	0	0
A0A087WPL5;O70133;A0A0R4J2C3;A0A087WRT3	A0A087WPL5;O70133	94;91;32;7	1;1;1;0	1;1;1;0	ATP-dependent RNA helicase A	Dhx9	tr|A0A087WPL5|A0A087WPL5_MOUSE RNA helicase OS=Mus musculus OX=10090 GN=Dhx9 PE=1 SV=1;sp|O70133|DHX9_MOUSE ATP-dependent RNA helicase A OS=Mus musculus OX=10090 GN=Dhx9 PE=1 SV=2	4	94	1	1	10	7	7	78	77	77	82	82	85	0	0	0	1	1	1	1	1	1	0	0	0	1	1	1	1	1	1	63	1.6	1.6	149.62	1383	1383;1380;459;47	0	39.082	8.6	6.4	5.5
A0A087WQ84;Q6PB97	A0A087WQ84;Q6PB97	3;3	3;3	3;3	F-box/LRR-repeat protein 19	Fbxl19	tr|A0A087WQ84|A0A087WQ84_MOUSE F-box and leucine-rich repeat protein 19 OS=Mus musculus OX=10090 GN=Fbxl19 PE=1 SV=1;sp|Q6PB97|FXL19_MOUSE F-box/LRR-repeat protein 19 OS=Mus musculus OX=10090 GN=Fbxl19 PE=1 SV=1	2	3	3	3	0	0	0	0	2	1	0	1	0	0	0	0	0	2	1	0	1	0	0	0	0	0	2	1	0	1	0	11	11	11	42.284	382	382;674	0	4.6643	0	0	0
A0A087WQD8;Q149C2	A0A087WQD8;Q149C2	10;9	10;9	10;9	TRAF3-interacting protein 1	Traf3ip1	tr|A0A087WQD8|A0A087WQD8_MOUSE TRAF3 interacting protein 1 OS=Mus musculus OX=10090 GN=Traf3ip1 PE=1 SV=1;sp|Q149C2|MIPT3_MOUSE TRAF3-interacting protein 1 OS=Mus musculus OX=10090 GN=Traf3ip1 PE=1 SV=2	2	10	10	10	0	0	0	0	0	0	8	9	8	0	0	0	0	0	0	8	9	8	0	0	0	0	0	0	8	9	8	14.7	14.7	14.7	74.277	654	654;625	0	22.565	0	0	0
A0A087WQM0;A0A6I8MWZ2;A0A087WQS0;A0A087WQ94;A0A1D5RM59;E9Q0S6;A0A087WRU0;Q9DBT6;A0A087WPC7;A0A087WR29;A0A087WP40;A0A5F8MP98;A0A5F8MPF2;Q5SSZ5	A0A087WQM0;A0A6I8MWZ2;A0A087WQS0;A0A087WQ94;A0A1D5RM59;E9Q0S6;A0A087WRU0;Q9DBT6	18;18;18;17;17;17;16;12;2;1;1;1;1;1	18;18;18;17;17;17;16;12;2;1;1;1;1;1	17;17;17;16;16;16;15;11;2;1;1;0;0;0		Tns1	tr|A0A087WQM0|A0A087WQM0_MOUSE Tensin 1 OS=Mus musculus OX=10090 GN=Tns1 PE=1 SV=1;tr|A0A6I8MWZ2|A0A6I8MWZ2_MOUSE Tensin 1 OS=Mus musculus OX=10090 GN=Tns1 PE=1 SV=1;tr|A0A087WQS0|A0A087WQS0_MOUSE Tensin 1 OS=Mus musculus OX=10090 GN=Tns1 PE=1 SV=1;tr|A0A0	14	18	18	17	0	1	1	12	12	10	8	11	14	0	1	1	12	12	10	8	11	14	0	1	1	11	11	9	8	10	13	14.9	14.9	14.2	194.7	1823	1823;1844;1867;1719;1880;1888;1705;624;149;142;196;1553;1589;1440	0	104.35	0	0.4	0.7
A0A087WQN7;F8VQ87;P97789;A0A087WNV6	A0A087WQN7;F8VQ87;P97789;A0A087WNV6	13;13;12;7	13;13;12;7	13;13;12;7	5-3 exoribonuclease 1	Xrn1	tr|A0A087WQN7|A0A087WQN7_MOUSE 5-3 exoribonuclease 1 OS=Mus musculus OX=10090 GN=Xrn1 PE=1 SV=1;tr|F8VQ87|F8VQ87_MOUSE 5-3 exoribonuclease 1 OS=Mus musculus OX=10090 GN=Xrn1 PE=1 SV=1;sp|P97789|XRN1_MOUSE 5-3 exoribonuclease 1 OS=Mus musculus OX=1009	4	13	13	13	0	0	0	8	9	6	8	8	7	0	0	0	8	9	6	8	8	7	0	0	0	8	9	6	8	8	7	8.5	8.5	8.5	194.3	1719	1719;1723;1719;969	0	33.368	0	0	0
E9Q0T8;A0A571BD48;A0A087WR13;L7N1Y0	E9Q0T8;A0A571BD48;A0A087WR13;L7N1Y0	4;4;4;4	3;3;3;3	2;2;2;2		Dnah7a;Dnah7c;Dnah7b	tr|E9Q0T8|E9Q0T8_MOUSE Dynein, axonemal, heavy chain 7A OS=Mus musculus OX=10090 GN=Dnah7a PE=1 SV=2;tr|A0A571BD48|A0A571BD48_MOUSE Dynein, axonemal, heavy chain 7B OS=Mus musculus OX=10090 GN=Dnah7b PE=1 SV=1;tr|A0A087WR13|A0A087WR13_MOUSE Dynein, axonema	4	4	3	2	0	0	0	0	1	0	2	3	3	0	0	0	0	0	0	1	2	2	0	0	0	0	0	0	1	1	1	1	0.7	0.5	460.9	4024	4024;4024;4024;4068	0.0034086	2.0491	0	0	0
B7ZNJ1;A0A087WS56;B9EHT6;A0A087WSN6;Q3UHL6;A0A087WR50;P11276;Q4KL80	B7ZNJ1;A0A087WS56;B9EHT6;A0A087WSN6;Q3UHL6;A0A087WR50;P11276;Q4KL80	4;4;4;4;4;4;4;2	4;4;4;4;4;4;4;2	4;4;4;4;4;4;4;2	Fibronectin;Anastellin	Fn1	tr|B7ZNJ1|B7ZNJ1_MOUSE Fibronectin OS=Mus musculus OX=10090 GN=Fn1 PE=1 SV=1;tr|A0A087WS56|A0A087WS56_MOUSE Fibronectin OS=Mus musculus OX=10090 GN=Fn1 PE=1 SV=1;tr|B9EHT6|B9EHT6_MOUSE Fibronectin OS=Mus musculus OX=10090 GN=Fn1 PE=1 SV=1;tr|A0A087WSN6|A0A	8	4	4	4	2	3	3	0	0	0	0	0	0	2	3	3	0	0	0	0	0	0	2	3	3	0	0	0	0	0	0	1.9	1.9	1.9	239.72	2176	2176;2266;2271;2296;2361;2386;2477;383	0	4.8046	1.1	1.6	1.6
A0A087WRI1;Q8CFQ1;Q99K94;Q8C3V4;A0A087WSP5;P42225	A0A087WRI1;Q8CFQ1;Q99K94;Q8C3V4;A0A087WSP5;P42225	1;1;1;1;1;1	1;1;1;1;1;1	1;1;1;1;1;1	Signal transducer and activator of transcription;Signal transducer and activator of transcription 1	Stat1	tr|A0A087WRI1|A0A087WRI1_MOUSE Signal transducer and activator of transcription 1 (Fragment) OS=Mus musculus OX=10090 GN=Stat1 PE=1 SV=1;tr|Q8CFQ1|Q8CFQ1_MOUSE Signal transducer and activator of transcription 1 (Fragment) OS=Mus musculus OX=10090 GN=Stat1	6	1	1	1	1	1	1	1	0	1	1	0	0	1	1	1	1	0	1	1	0	0	1	1	1	1	0	1	1	0	0	9.2	9.2	9.2	15.068	131	131;243;712;749;755;749	0.004158	1.835	9.2	9.2	9.2
A0A087WSD2	A0A087WSD2	9	9	9		Ms4a14	tr|A0A087WSD2|A0A087WSD2_MOUSE Membrane-spanning 4-domains, subfamily A, member 14 OS=Mus musculus OX=10090 GN=Ms4a14 PE=1 SV=1	1	9	9	9	5	4	2	0	2	3	4	3	6	5	4	2	0	2	3	4	3	6	5	4	2	0	2	3	4	3	6	10	10	10	137.56	1232	1232	0	29.408	5.3	3.4	2.1
A0A087WSQ7;A0A087WSG5;P51949	A0A087WSQ7;A0A087WSG5;P51949	1;1;1	1;1;1	1;1;1	CDK-activating kinase assembly factor MAT1	Mnat1	tr|A0A087WSQ7|A0A087WSQ7_MOUSE Menage a trois 1 OS=Mus musculus OX=10090 GN=Mnat1 PE=1 SV=1;tr|A0A087WSG5|A0A087WSG5_MOUSE Menage a trois 1 OS=Mus musculus OX=10090 GN=Mnat1 PE=1 SV=1;sp|P51949|MAT1_MOUSE CDK-activating kinase assembly factor MAT1 OS=Mus m	3	1	1	1	0	0	0	0	0	0	0	1	0	0	0	0	0	0	0	0	1	0	0	0	0	0	0	0	0	1	0	17.2	17.2	17.2	10.598	93	93;249;309	0.0037547	1.851	0	0	0
A0A0A0MQ80;Q3UMC0;A0A0G2JFY0;D3Z0U5;D6RGM7;D3Z4J2;Q9D3R6	A0A0A0MQ80;Q3UMC0;A0A0G2JFY0	19;19;18;1;1;1;1	19;19;18;1;1;1;1	19;19;18;1;1;1;1	Spermatogenesis-associated protein 5	Spata5	tr|A0A0A0MQ80|A0A0A0MQ80_MOUSE vesicle-fusing ATPase OS=Mus musculus OX=10090 GN=Afg2a PE=1 SV=1;sp|Q3UMC0|AFG2A_MOUSE ATPase family gene 2 protein homolog A OS=Mus musculus OX=10090 GN=Afg2a PE=1 SV=2;tr|A0A0G2JFY0|A0A0G2JFY0_MOUSE Spermatogenesis associa	7	19	19	19	5	6	6	7	10	7	11	11	12	5	6	6	7	10	7	11	11	12	5	6	6	7	10	7	11	11	12	25.9	25.9	25.9	97.156	892	892;893;842;277;372;495;539	0	72.068	8.5	9.6	10.2
A0A0R4J0X5;A0A0A0MQA3;Q00896;P07758;Q00897;P22599	A0A0R4J0X5;A0A0A0MQA3;Q00896;P07758;Q00897;P22599	4;4;4;4;3;3	4;4;4;4;3;3	3;3;3;3;2;2	Alpha-1-antitrypsin 1-3;Alpha-1-antitrypsin 1-1;Alpha-1-antitrypsin 1-4;Alpha-1-antitrypsin 1-2	Serpina1a;Serpina1c;Serpina1d;Serpina1b	tr|A0A0R4J0X5|A0A0R4J0X5_MOUSE Serine (or cysteine) peptidase inhibitor, clade A, member 1C OS=Mus musculus OX=10090 GN=Serpina1c PE=1 SV=1;tr|A0A0A0MQA3|A0A0A0MQA3_MOUSE Serine (or cysteine) peptidase inhibitor, clade A, member 1A OS=Mus musculus OX=10090	6	4	4	3	0	4	3	3	2	1	0	0	0	0	4	3	3	2	1	0	0	0	0	3	2	2	1	0	0	0	0	12.6	12.6	9.4	45.854	413	413;436;412;413;413;413	0	7.3694	0	12.6	8
A0A0A0MQA5;P68368;A0A087WRB4;A0A087WQS4;A0A087WSB0;A0A087WSL5	A0A0A0MQA5;P68368	23;23;4;4;1;1	1;1;0;0;0;0	1;1;0;0;0;0	Tubulin alpha-4A chain	Tuba4a	tr|A0A0A0MQA5|A0A0A0MQA5_MOUSE Tubulin alpha chain (Fragment) OS=Mus musculus OX=10090 GN=Tuba4a PE=1 SV=1;sp|P68368|TBA4A_MOUSE Tubulin alpha-4A chain OS=Mus musculus OX=10090 GN=Tuba4a PE=1 SV=1	6	23	1	1	17	16	16	15	16	17	18	18	20	0	0	1	0	1	1	1	0	1	0	0	1	0	1	1	1	0	1	44.9	2.1	2.1	52.793	477	477;448;100;125;81;89	0.00090253	2.4629	36.5	38.2	37.1
A0A0A0MQD1;Q8K1H1	A0A0A0MQD1;Q8K1H1	35;35	35;35	35;35	Tudor domain-containing protein 7	Tdrd7	tr|A0A0A0MQD1|A0A0A0MQD1_MOUSE Tudor domain-containing protein 7 OS=Mus musculus OX=10090 GN=Tdrd7 PE=1 SV=1;sp|Q8K1H1|TDRD7_MOUSE Tudor domain-containing protein 7 OS=Mus musculus OX=10090 GN=Tdrd7 PE=1 SV=1	2	35	35	35	0	0	0	27	25	22	18	18	17	0	0	0	27	25	22	18	18	17	0	0	0	27	25	22	18	18	17	35.4	35.4	35.4	125.84	1119	1119;1086	0	198.54	0	0	0
A0A0A0MQD2;J3QNB9	A0A0A0MQD2	33;16	1;0	1;0		Ybx2	tr|A0A0A0MQD2|A0A0A0MQD2_MOUSE Y box protein 2 OS=Mus musculus OX=10090 GN=Ybx2 PE=1 SV=1	2	33	1	1	14	13	12	30	31	29	32	32	32	0	0	0	1	1	1	1	1	1	0	0	0	1	1	1	1	1	1	82.6	3.9	3.9	31.438	282	282;164	0	3.5512	53.9	59.2	53.9
A2AHC3;A0A0A0MQE5;A2AHC4	A2AHC3;A0A0A0MQE5	3;3;1	3;3;1	3;3;1	Calmodulin-regulated spectrin-associated protein 1	Camsap1	sp|A2AHC3|CAMP1_MOUSE Calmodulin-regulated spectrin-associated protein 1 OS=Mus musculus OX=10090 GN=Camsap1 PE=1 SV=1;tr|A0A0A0MQE5|A0A0A0MQE5_MOUSE Calmodulin regulated spectrin-associated protein 1 OS=Mus musculus OX=10090 GN=Camsap1 PE=1 SV=1	3	3	3	3	0	0	0	1	0	1	0	1	1	0	0	0	1	0	1	0	1	1	0	0	0	1	0	1	0	1	1	2.4	2.4	2.4	175.89	1581	1581;1582;1077	0	2.8998	0	0	0
B7ZCJ0;A0A0A0MQE8;B7ZCJ1;Q6DFV3	B7ZCJ0;A0A0A0MQE8;B7ZCJ1;Q6DFV3	1;1;1;1	1;1;1;1	1;1;1;1	Rho GTPase-activating protein 21	Arhgap21	tr|B7ZCJ0|B7ZCJ0_MOUSE Rho GTPase activating protein 21 OS=Mus musculus OX=10090 GN=Arhgap21 PE=1 SV=1;tr|A0A0A0MQE8|A0A0A0MQE8_MOUSE Rho GTPase activating protein 21 OS=Mus musculus OX=10090 GN=Arhgap21 PE=1 SV=1;tr|B7ZCJ1|B7ZCJ1_MOUSE Rho GTPase activati	4	1	1	1	0	0	0	1	0	0	1	1	1	0	0	0	1	0	0	1	1	1	0	0	0	1	0	0	1	1	1	0.5	0.5	0.5	215.86	1945	1945;1949;1955;1945	0.0072	1.6011	0	0	0
A0A0A0MQM0;Q8BGY2;P63242	A0A0A0MQM0;Q8BGY2;P63242	2;2;2	2;2;2	2;2;2	Eukaryotic translation initiation factor 5A;Eukaryotic translation initiation factor 5A-2;Eukaryotic translation initiation factor 5A-1	Eif5a;Eif5a2	tr|A0A0A0MQM0|A0A0A0MQM0_MOUSE Eukaryotic translation initiation factor 5A (Fragment) OS=Mus musculus OX=10090 GN=Eif5a PE=1 SV=1;sp|Q8BGY2|IF5A2_MOUSE Eukaryotic translation initiation factor 5A-2 OS=Mus musculus OX=10090 GN=Eif5a2 PE=1 SV=3;sp|P63242|IF5	3	2	2	2	1	1	0	1	1	1	1	1	2	1	1	0	1	1	1	1	1	2	1	1	0	1	1	1	1	1	2	13.4	13.4	13.4	16.302	149	149;153;154	0	2.9926	8.1	8.1	0
A0A0A6YVU8;Q9JKV1	A0A0A6YVU8;Q9JKV1	2;2	2;2	2;2	Proteasomal ubiquitin receptor ADRM1	Gm9774;Adrm1	tr|A0A0A6YVU8|A0A0A6YVU8_MOUSE Adhesion regulating molecule 1B OS=Mus musculus OX=10090 GN=Adrm1b PE=3 SV=1;sp|Q9JKV1|ADRM1_MOUSE Proteasomal ubiquitin receptor ADRM1 OS=Mus musculus OX=10090 GN=Adrm1 PE=1 SV=2	2	2	2	2	1	1	1	2	1	1	0	0	0	1	1	1	2	1	1	0	0	0	1	1	1	2	1	1	0	0	0	7.6	7.6	7.6	42.147	407	407;407	0	5.2924	3.9	3.9	3.9
A0A0A6YWB0;A0A0A6YVV8;A0A0A6YXP3;A0A0A6YWG1;A0A0A6YXQ4;A0A0A6YXL7;A0A0A6YWJ5;Q3U570;Q3TJQ3	A0A0A6YWB0;A0A0A6YVV8;A0A0A6YXP3	9;9;5;4;4;2;2;2;1	9;9;5;4;4;2;2;2;1	2;2;0;2;2;0;0;0;0		Mbnl1	tr|A0A0A6YWB0|A0A0A6YWB0_MOUSE Muscleblind like splicing factor 1 OS=Mus musculus OX=10090 GN=Mbnl1 PE=1 SV=1;tr|A0A0A6YVV8|A0A0A6YVV8_MOUSE Muscleblind like splicing factor 1 OS=Mus musculus OX=10090 GN=Mbnl1 PE=1 SV=1;tr|A0A0A6YXP3|A0A0A6YXP3_MOUSE Muscl	9	9	9	2	0	0	0	5	5	4	5	6	7	0	0	0	5	5	4	5	6	7	0	0	0	1	0	0	1	1	1	30.5	30.5	13.8	37.8	347	347;387;182;257;302;192;209;254;246	0	17.712	0	0	0
A0A0A6YVX6;A0A0A6YW60;Q8BKH7	A0A0A6YVX6;A0A0A6YW60;Q8BKH7	1;1;1	1;1;1	1;1;1	Target of rapamycin complex 2 subunit MAPKAP1	Mapkap1	tr|A0A0A6YVX6|A0A0A6YVX6_MOUSE Mitogen-activated protein kinase associated protein 1 (Fragment) OS=Mus musculus OX=10090 GN=Mapkap1 PE=1 SV=1;tr|A0A0A6YW60|A0A0A6YW60_MOUSE Mitogen-activated protein kinase associated protein 1 (Fragment) OS=Mus musculus OX	3	1	1	1	1	1	1	1	1	0	0	0	0	1	1	1	1	1	0	0	0	0	1	1	1	1	1	0	0	0	0	70	70	70	2.2776	20	20;171;522	0	7.9274	70	70	70
B7ZNR9;B2RUE8;A0A0A6YWR8;F8VPL5;A0A0A6YWM8;E9PVG7;A0A0A6YW53;P97820;E0CXD6;B9EKN8;G3X9G2;Q5SXG3;Q5SXG1;E9PUL9;E0CY98;E0CZD7;A0A0A6YVZ8;E0CZF8;B2RQ80;Q9JM52;P83510;F7AMS7;E0CYV5	B7ZNR9;B2RUE8;A0A0A6YWR8;F8VPL5;A0A0A6YWM8;E9PVG7;A0A0A6YW53;P97820;E0CXD6;B9EKN8;G3X9G2;Q5SXG3;Q5SXG1;E9PUL9;E0CY98;E0CZD7;A0A0A6YVZ8;E0CZF8;B2RQ80;Q9JM52;P83510;F7AMS7;E0CYV5	6;6;6;6;6;6;6;5;5;5;5;5;5;5;5;5;5;5;5;5;5;3;3	6;6;6;6;6;6;6;5;5;5;5;5;5;5;5;5;5;5;5;5;5;3;3	6;6;6;6;6;6;6;5;5;5;5;5;5;5;5;5;5;5;5;5;5;3;3	Mitogen-activated protein kinase kinase kinase kinase 4;Misshapen-like kinase 1;Traf2 and NCK-interacting protein kinase	Map4k4;Tnik;Mink1	tr|B7ZNR9|B7ZNR9_MOUSE Map4k4 protein OS=Mus musculus OX=10090 GN=Map4k4 PE=1 SV=1;tr|B2RUE8|B2RUE8_MOUSE Map4k4 protein OS=Mus musculus OX=10090 GN=Map4k4 PE=1 SV=1;tr|A0A0A6YWR8|A0A0A6YWR8_MOUSE Mitogen-activated protein kinase kinase kinase kinase 4 OS=	23	6	6	6	1	1	0	3	2	3	3	5	3	1	1	0	3	2	3	3	5	3	1	1	0	3	2	3	3	5	3	4.5	4.5	4.5	137.9	1208	1208;1221;1234;1238;1272;1288;1288;1233;1297;1352;1344;1337;1334;1331;1305;1276;404;1268;1360;1308;1323;1198;227	0	12.751	0.6	0.6	0
A0A0A6YW80;G3X8Y3;Q80UM3;A0A0A6YX86;A0A0A6YXF4	A0A0A6YW80;G3X8Y3;Q80UM3;A0A0A6YX86	3;3;3;2;1	3;3;3;2;1	3;3;3;2;1	N-alpha-acetyltransferase 15, NatA auxiliary subunit	Naa15	tr|A0A0A6YW80|A0A0A6YW80_MOUSE N(alpha)-acetyltransferase 15, NatA auxiliary subunit OS=Mus musculus OX=10090 GN=Naa15 PE=1 SV=1;tr|G3X8Y3|G3X8Y3_MOUSE N(alpha)-acetyltransferase 15, NatA auxiliary subunit OS=Mus musculus OX=10090 GN=Naa15 PE=1 SV=1;sp|Q80	5	3	3	3	1	2	1	1	1	1	3	2	1	1	2	1	1	1	1	3	2	1	1	2	1	1	1	1	3	2	1	3.8	3.8	3.8	95.295	815	815;865;865;237;126	0	3.0837	1.1	2.5	1.3
A0A0A6YWB3;Q3TFK5	A0A0A6YWB3;Q3TFK5	1;1	1;1	1;1	G patch domain-containing protein 4	Gpatch4	tr|A0A0A6YWB3|A0A0A6YWB3_MOUSE G patch domain containing 4 (Fragment) OS=Mus musculus OX=10090 GN=Gpatch4 PE=1 SV=1;sp|Q3TFK5|GPTC4_MOUSE G patch domain-containing protein 4 OS=Mus musculus OX=10090 GN=Gpatch4 PE=1 SV=1	2	1	1	1	0	0	0	0	0	0	0	0	1	0	0	0	0	0	0	0	0	1	0	0	0	0	0	0	0	0	1	5.4	5.4	5.4	26.538	239	239;415	0.0033827	1.9762	0	0	0
D3YVN1;A0A0A6YWG8;Q9Z2N8;A0A0A6YWR1;D3Z4L2;F8WI57;Q99MR0	D3YVN1;A0A0A6YWG8;Q9Z2N8	5;5;5;1;1;1;1	5;5;5;1;1;1;1	5;5;5;1;1;1;1	Actin-like protein 6A	Actl6a	tr|D3YVN1|D3YVN1_MOUSE Actin-like 6A (Fragment) OS=Mus musculus OX=10090 GN=Actl6a PE=1 SV=1;tr|A0A0A6YWG8|A0A0A6YWG8_MOUSE Actin-like 6A (Fragment) OS=Mus musculus OX=10090 GN=Actl6a PE=1 SV=1;sp|Q9Z2N8|ACL6A_MOUSE Actin-like protein 6A OS=Mus musculus OX	7	5	5	5	2	2	2	1	2	1	3	5	3	2	2	2	1	2	1	3	5	3	2	2	2	1	2	1	3	5	3	42.2	42.2	42.2	23.122	204	204;245;429;54;116;381;426	0	45.458	12.3	12.3	12.3
E9QKE4;A0A0A6YWM5;Q8BMG7	E9QKE4;A0A0A6YWM5;Q8BMG7	1;1;1	1;1;1	1;1;1	Rab3 GTPase-activating protein non-catalytic subunit	Rab3gap2	tr|E9QKE4|E9QKE4_MOUSE RAB3 GTPase activating protein subunit 2 OS=Mus musculus OX=10090 GN=Rab3gap2 PE=1 SV=1;tr|A0A0A6YWM5|A0A0A6YWM5_MOUSE RAB3 GTPase activating protein subunit 2 OS=Mus musculus OX=10090 GN=Rab3gap2 PE=1 SV=1;sp|Q8BMG7|RBGPR_MOUSE Rab3	3	1	1	1	0	0	1	1	0	1	0	0	0	0	0	1	1	0	1	0	0	0	0	0	1	1	0	1	0	0	0	0.8	0.8	0.8	154.64	1387	1387;1367;1366	0.0013169	2.2711	0	0	0.8
A0A0A6YWZ0;A0A0A6YWV6;Q3UNZ8	A0A0A6YWZ0;A0A0A6YWV6;Q3UNZ8	1;1;1	1;1;1	1;1;1	Quinone oxidoreductase-like protein 2	BC026585	tr|A0A0A6YWZ0|A0A0A6YWZ0_MOUSE Crystallin zeta like 2 (Fragment) OS=Mus musculus OX=10090 GN=Cryzl2 PE=1 SV=1;tr|A0A0A6YWV6|A0A0A6YWV6_MOUSE Crystallin zeta like 2 OS=Mus musculus OX=10090 GN=Cryzl2 PE=1 SV=1;sp|Q3UNZ8|QORL2_MOUSE Quinone oxidoreductase-li	3	1	1	1	0	0	0	0	1	1	0	0	0	0	0	0	0	1	1	0	0	0	0	0	0	0	1	1	0	0	0	19	19	19	15.142	142	142;213;350	0	7.4798	0	0	0
E9Q9M5;A0A0A6YWX1;J3KMM1;A0A991ELD7;Q3UJD6;A0A0A6YWN9;A0A0A6YX42	E9Q9M5;A0A0A6YWX1;J3KMM1;A0A991ELD7;Q3UJD6;A0A0A6YWN9	6;6;6;6;6;5;1	6;6;6;6;6;5;1	6;6;6;6;6;5;1	Ubiquitin carboxyl-terminal hydrolase;Ubiquitin carboxyl-terminal hydrolase 19	Usp19	tr|E9Q9M5|E9Q9M5_MOUSE ubiquitinyl hydrolase 1 OS=Mus musculus OX=10090 GN=Usp19 PE=1 SV=1;tr|A0A0A6YWX1|A0A0A6YWX1_MOUSE ubiquitinyl hydrolase 1 OS=Mus musculus OX=10090 GN=Usp19 PE=1 SV=1;tr|J3KMM1|J3KMM1_MOUSE ubiquitinyl hydrolase 1 OS=Mus musculus OX=	7	6	6	6	0	0	0	0	1	0	5	5	5	0	0	0	0	1	0	5	5	5	0	0	0	0	1	0	5	5	5	5.2	5.2	5.2	143.45	1299	1299;1322;1324;1390;1360;991;295	0	8.7469	0	0	0
A0A0A6YX18;Q8BVE3;A0A0A6YWP6;A0A0A6YVU0	A0A0A6YX18;Q8BVE3;A0A0A6YWP6	7;7;6;1	7;7;6;1	7;7;6;1	V-type proton ATPase subunit H	Atp6v1h	tr|A0A0A6YX18|A0A0A6YX18_MOUSE V-type proton ATPase subunit H OS=Mus musculus OX=10090 GN=Atp6v1h PE=1 SV=1;sp|Q8BVE3|VATH_MOUSE V-type proton ATPase subunit H OS=Mus musculus OX=10090 GN=Atp6v1h PE=1 SV=1;tr|A0A0A6YWP6|A0A0A6YWP6_MOUSE V-type proton ATPas	4	7	7	7	4	4	3	4	2	3	2	4	2	4	4	3	4	2	3	2	4	2	4	4	3	4	2	3	2	4	2	22.4	22.4	22.4	54.108	465	465;483;441;140	0	30.902	14.2	12.9	9.7
P62900;A0A0A6YX26;A0A0A6YXL3	P62900;A0A0A6YX26;A0A0A6YXL3	8;8;5	8;8;5	8;8;5	60S ribosomal protein L31	Rpl31	sp|P62900|RL31_MOUSE Large ribosomal subunit protein eL31 OS=Mus musculus OX=10090 GN=Rpl31 PE=1 SV=1;tr|A0A0A6YX26|A0A0A6YX26_MOUSE Large ribosomal subunit protein eL31 OS=Mus musculus OX=10090 GN=Rpl31 PE=1 SV=1;tr|A0A0A6YXL3|A0A0A6YXL3_MOUSE Large ribos	3	8	8	8	2	2	3	4	3	3	7	6	7	2	2	3	4	3	3	7	6	7	2	2	3	4	3	3	7	6	7	49.6	49.6	49.6	14.463	125	125;129;87	0	41.411	18.4	18.4	25.6
A0A0A6YX73;Q8K1M3;P12367;A0A0A6YY28;H3BK84;P31324	A0A0A6YX73;Q8K1M3;P12367;A0A0A6YY28	3;3;3;2;1;1	3;3;3;2;1;1	3;3;3;2;1;1	cAMP-dependent protein kinase type II-alpha regulatory subunit	Prkar2a	tr|A0A0A6YX73|A0A0A6YX73_MOUSE Protein kinase, cAMP dependent regulatory, type II alpha OS=Mus musculus OX=10090 GN=Prkar2a PE=1 SV=1;tr|Q8K1M3|Q8K1M3_MOUSE Protein kinase, cAMP dependent regulatory, type II alpha OS=Mus musculus OX=10090 GN=Prkar2a PE=1 S	6	3	3	3	0	0	0	1	1	0	2	3	2	0	0	0	1	1	0	2	3	2	0	0	0	1	1	0	2	3	2	11.8	11.8	11.8	43.165	380	380;402;401;200;256;416	0	22.941	0	0	0
A0A0A6YXC8;E9QKR1;A0A0A6YW06;J3QNM3;E9QKQ9;E9QLZ9;Q03173	A0A0A6YXC8;E9QKR1;A0A0A6YW06;J3QNM3;E9QKQ9;E9QLZ9;Q03173	3;2;2;2;2;2;2	3;2;2;2;2;2;2	3;2;2;2;2;2;2	Protein enabled homolog	Enah	tr|A0A0A6YXC8|A0A0A6YXC8_MOUSE ENAH actin regulator OS=Mus musculus OX=10090 GN=Enah PE=1 SV=1;tr|E9QKR1|E9QKR1_MOUSE ENAH actin regulator OS=Mus musculus OX=10090 GN=Enah PE=1 SV=2;tr|A0A0A6YW06|A0A0A6YW06_MOUSE ENAH actin regulator OS=Mus musculus OX=100	7	3	3	3	0	0	0	0	0	0	1	2	0	0	0	0	0	0	0	1	2	0	0	0	0	0	0	0	1	2	0	7.1	7.1	7.1	58.35	524	524;562;785;789;789;804;802	0	3.7984	0	0	0
A0A0A6YXK7;H7BX26;Q6A065;A0A0A6YVZ3;A0A0A6YX99	A0A0A6YXK7;H7BX26;Q6A065;A0A0A6YVZ3;A0A0A6YX99	2;2;2;1;1	2;2;2;1;1	2;2;2;1;1	Centrosomal protein of 170 kDa	Cep170	tr|A0A0A6YXK7|A0A0A6YXK7_MOUSE Centrosomal protein 170 (Fragment) OS=Mus musculus OX=10090 GN=Cep170 PE=1 SV=1;tr|H7BX26|H7BX26_MOUSE Centrosomal protein 170 OS=Mus musculus OX=10090 GN=Cep170 PE=1 SV=1;sp|Q6A065|CE170_MOUSE Centrosomal protein of 170 kDa	5	2	2	2	0	0	0	1	1	1	2	2	1	0	0	0	1	1	1	2	2	1	0	0	0	1	1	1	2	2	1	2.3	2.3	2.3	85.921	787	787;1578;1588;296;346	0	3.3974	0	0	0
A0A0B4J1E2;Q9CSN1	A0A0B4J1E2;Q9CSN1	16;15	16;15	16;15	SNW domain-containing protein 1	Snw1	tr|A0A0B4J1E2|A0A0B4J1E2_MOUSE SNW domain-containing protein 1 OS=Mus musculus OX=10090 GN=Snw1 PE=1 SV=1;sp|Q9CSN1|SNW1_MOUSE SNW domain-containing protein 1 OS=Mus musculus OX=10090 GN=Snw1 PE=1 SV=3	2	16	16	16	3	4	3	13	8	11	14	12	12	3	4	3	13	8	11	14	12	12	3	4	3	13	8	11	14	12	12	34	34	34	61.461	536	536;536	0	67.478	4.9	7.3	8.2
A0A0G2JDL3;P49615;E9Q9E4;E9PZX7;E3W997;E9PVC7;A0A1L1SUS7;P30285;Q64261;Q3V3A1;Q04899;O35495;Q8K0D0	A0A0G2JDL3;P49615	4;4;1;1;1;1;1;1;1;1;1;1;1	3;3;0;0;0;0;0;0;0;0;0;0;0	3;3;0;0;0;0;0;0;0;0;0;0;0	Cyclin-dependent-like kinase 5	Cdk5	tr|A0A0G2JDL3|A0A0G2JDL3_MOUSE Cyclin-dependent kinase 5 OS=Mus musculus OX=10090 GN=Cdk5 PE=1 SV=1;sp|P49615|CDK5_MOUSE Cyclin-dependent kinase 5 OS=Mus musculus OX=10090 GN=Cdk5 PE=1 SV=1	13	4	3	3	2	2	1	2	1	1	0	2	2	2	1	1	1	0	0	0	1	1	2	1	1	1	0	0	0	1	1	17.3	14.2	14.2	29.528	260	260;292;253;271;435;451;481;303;326;433;451;469;523	0	2.9018	7.3	6.2	3.1
A0A0G2JDL9;Q99JI6;P62835;A0A1W2P777;A0A0G2JE52	A0A0G2JDL9;Q99JI6;P62835;A0A1W2P777	3;3;3;2;1	3;3;3;2;1	2;2;2;2;0	Ras-related protein Rap-1b;Ras-related protein Rap-1A	Rap1b;Rap1a	tr|A0A0G2JDL9|A0A0G2JDL9_MOUSE RAS-related protein 1a OS=Mus musculus OX=10090 GN=Rap1a PE=1 SV=1;sp|Q99JI6|RAP1B_MOUSE Ras-related protein Rap-1b OS=Mus musculus OX=10090 GN=Rap1b PE=1 SV=2;sp|P62835|RAP1A_MOUSE Ras-related protein Rap-1A OS=Mus musculus	5	3	3	2	2	2	1	2	2	2	2	3	2	2	2	1	2	2	2	2	3	2	1	1	0	1	2	1	1	2	1	21.2	21.2	11.9	13.426	118	118;184;184;53;159	0	8.8152	21.2	21.2	9.3
A0A0G2JDW7;Q6ZWU9;Q6ZWY3;A0A0G2JEX7;A0A0G2JG29;D6RH49;D3YYB0	A0A0G2JDW7;Q6ZWU9;Q6ZWY3;A0A0G2JEX7;A0A0G2JG29	4;4;3;2;2;1;1	4;4;3;2;2;1;1	4;4;3;2;2;1;1	40S ribosomal protein S27;40S ribosomal protein S27-like	Rps27;Rps27l	tr|A0A0G2JDW7|A0A0G2JDW7_MOUSE 40S ribosomal protein S27 (Fragment) OS=Mus musculus OX=10090 GN=Rps27 PE=1 SV=1;sp|Q6ZWU9|RS27_MOUSE Small ribosomal subunit protein eS27 OS=Mus musculus OX=10090 GN=Rps27 PE=1 SV=3;sp|Q6ZWY3|RS27L_MOUSE Small ribosomal subu	7	4	4	4	3	2	2	3	3	3	3	3	3	3	2	2	3	3	3	3	3	3	3	2	2	3	3	3	3	3	3	42.7	42.7	42.7	9.2327	82	82;84;84;52;83;77;105	0	8.6146	26.8	25.6	25.6
E9QKG6;A0A0G2JDZ9;E9Q804;Q99NH0;A0A1W2P6X1	E9QKG6;A0A0G2JDZ9;E9Q804;Q99NH0;A0A1W2P6X1	9;9;9;9;7	9;9;9;9;7	4;4;4;4;2	Ankyrin repeat domain-containing protein 17	Ankrd17	tr|E9QKG6|E9QKG6_MOUSE Ankyrin repeat domain 17 OS=Mus musculus OX=10090 GN=Ankrd17 PE=1 SV=1;tr|A0A0G2JDZ9|A0A0G2JDZ9_MOUSE Ankyrin repeat domain 17 OS=Mus musculus OX=10090 GN=Ankrd17 PE=1 SV=1;tr|E9Q804|E9Q804_MOUSE Ankyrin repeat domain 17 OS=Mus muscu	5	9	9	4	2	1	3	5	4	2	4	6	6	2	1	3	5	4	2	4	6	6	0	1	2	3	2	1	1	2	3	6	6	2.7	246.62	2352	2352;2494;2602;2603;1600	0	56.188	1.4	0.6	1.9
A0A0G2JE08;A0A0G2JFB2;Q80VL1	A0A0G2JE08;A0A0G2JFB2;Q80VL1	1;1;1	1;1;1	1;1;1	Tudor and KH domain-containing protein	Tdrkh	tr|A0A0G2JE08|A0A0G2JE08_MOUSE Tudor and KH domain containing protein OS=Mus musculus OX=10090 GN=Tdrkh PE=1 SV=1;tr|A0A0G2JFB2|A0A0G2JFB2_MOUSE Tudor and KH domain containing protein OS=Mus musculus OX=10090 GN=Tdrkh PE=1 SV=1;sp|Q80VL1|TDRKH_MOUSE Tudor	3	1	1	1	0	0	0	1	1	1	1	1	1	0	0	0	1	1	1	1	1	1	0	0	0	1	1	1	1	1	1	7.4	7.4	7.4	32.45	296	296;556;560	0	12.881	0	0	0
A0A0G2JEC4;Q9JK48	A0A0G2JEC4;Q9JK48	4;4	4;4	4;4	Endophilin-B1	Sh3glb1	tr|A0A0G2JEC4|A0A0G2JEC4_MOUSE Endophilin-B1 OS=Mus musculus OX=10090 GN=Sh3glb1 PE=1 SV=1;sp|Q9JK48|SHLB1_MOUSE Endophilin-B1 OS=Mus musculus OX=10090 GN=Sh3glb1 PE=1 SV=1	2	4	4	4	1	0	3	1	0	1	0	0	0	1	0	3	1	0	1	0	0	0	1	0	3	1	0	1	0	0	0	11.4	11.4	11.4	44.303	394	394;365	0	6.3561	2.8	0	9.9
A0A0R4J169;E9QN52;A0A0G2JEP4;A0A0G2JFV5;Q91WK0;A0A1L1SSC0;A0A668KLE1;A0A1L1SVG1;A0A1L1SQW1;A0A0G2JDR6;A0A0G2JGZ1	A0A0R4J169;E9QN52;A0A0G2JEP4;A0A0G2JFV5;Q91WK0;A0A1L1SSC0;A0A668KLE1;A0A1L1SVG1;A0A1L1SQW1	11;11;11;11;11;10;10;8;6;3;1	11;11;11;11;11;10;10;8;6;3;1	11;11;11;11;11;10;10;8;6;3;1	Leucine-rich repeat flightless-interacting protein 2	Lrrfip2	tr|A0A0R4J169|A0A0R4J169_MOUSE Leucine rich repeat (in FLII) interacting protein 2 OS=Mus musculus OX=10090 GN=Lrrfip2 PE=1 SV=1;tr|E9QN52|E9QN52_MOUSE Leucine rich repeat (in FLII) interacting protein 2 OS=Mus musculus OX=10090 GN=Lrrfip2 PE=1 SV=1;tr|A0A	11	11	11	11	8	4	5	0	0	0	1	1	2	8	4	5	0	0	0	1	1	2	8	4	5	0	0	0	1	1	2	22.5	22.5	22.5	45.524	400	400;415;424;437;415;670;722;373;403;173;173	0	23.306	18.5	9.5	10
A0A0G2JG59;A0A0G2JFD8;A0A0G2JGI1;A0A0G2JEX1;Q7TPW1	A0A0G2JG59;A0A0G2JFD8;A0A0G2JGI1;A0A0G2JEX1;Q7TPW1	3;3;3;3;3	3;3;3;3;3	3;3;3;3;3	Nexilin	Nexn	tr|A0A0G2JG59|A0A0G2JG59_MOUSE Nexilin (Fragment) OS=Mus musculus OX=10090 GN=Nexn PE=1 SV=1;tr|A0A0G2JFD8|A0A0G2JFD8_MOUSE Nexilin OS=Mus musculus OX=10090 GN=Nexn PE=1 SV=1;tr|A0A0G2JGI1|A0A0G2JGI1_MOUSE Nexilin OS=Mus musculus OX=10090 GN=Nexn PE=1 SV=1	5	3	3	3	1	2	2	0	0	0	0	0	0	1	2	2	0	0	0	0	0	0	1	2	2	0	0	0	0	0	0	7.6	7.6	7.6	56.496	473	473;536;593;671;607	0	3.9745	3.2	7.6	3.2
A0A0G2JF16;Q8R344	A0A0G2JF16;Q8R344	1;1	1;1	1;1	Coiled-coil domain-containing protein 12	Ccdc12	tr|A0A0G2JF16|A0A0G2JF16_MOUSE Coiled-coil domain containing 12 (Fragment) OS=Mus musculus OX=10090 GN=Ccdc12 PE=1 SV=1;sp|Q8R344|CCD12_MOUSE Coiled-coil domain-containing protein 12 OS=Mus musculus OX=10090 GN=Ccdc12 PE=1 SV=2	2	1	1	1	0	0	0	0	0	0	1	1	1	0	0	0	0	0	0	1	1	1	0	0	0	0	0	0	1	1	1	11.3	11.3	11.3	15.932	142	142;166	0	4.0294	0	0	0
A0A0G2JF44;Q9DAI2;A0A0H2UKB7;A0A0G2JDJ1	A0A0G2JF44;Q9DAI2;A0A0H2UKB7;A0A0G2JDJ1	2;2;1;1	2;2;1;1	2;2;1;1	Intraflagellar transport protein 22 homolog	Ift22	tr|A0A0G2JF44|A0A0G2JF44_MOUSE Intraflagellar transport 22 (Fragment) OS=Mus musculus OX=10090 GN=Ift22 PE=1 SV=1;sp|Q9DAI2|IFT22_MOUSE Intraflagellar transport protein 22 homolog OS=Mus musculus OX=10090 GN=Ift22 PE=1 SV=1;tr|A0A0H2UKB7|A0A0H2UKB7_MOUSE I	4	2	2	2	0	0	0	0	0	0	1	2	0	0	0	0	0	0	0	1	2	0	0	0	0	0	0	0	1	2	0	14.2	14.2	14.2	17.523	155	155;185;97;176	0.0079777	1.5769	0	0	0
A0A0G2JF68;Q99MP8;A0A0G2JFY1;D6RG84	A0A0G2JF68;Q99MP8;A0A0G2JFY1;D6RG84	2;2;1;1	2;2;1;1	2;2;1;1	BRCA1-associated protein	Brap	tr|A0A0G2JF68|A0A0G2JF68_MOUSE BRCA1 associated protein (Fragment) OS=Mus musculus OX=10090 GN=Brap PE=1 SV=1;sp|Q99MP8|BRAP_MOUSE BRCA1-associated protein OS=Mus musculus OX=10090 GN=Brap PE=1 SV=1;tr|A0A0G2JFY1|A0A0G2JFY1_MOUSE BRCA1 associated protein (	4	2	2	2	0	0	0	0	0	0	2	1	1	0	0	0	0	0	0	2	1	1	0	0	0	0	0	0	2	1	1	11.6	11.6	11.6	22.282	199	199;591;57;83	0	3.2886	0	0	0
A0A0G2JGD5;A0A0G2JF85;Q3UHD6	A0A0G2JGD5;A0A0G2JF85;Q3UHD6	1;1;1	1;1;1	1;1;1	Sorting nexin-27	Snx27	tr|A0A0G2JGD5|A0A0G2JGD5_MOUSE Sorting nexin family member 27 (Fragment) OS=Mus musculus OX=10090 GN=Snx27 PE=1 SV=1;tr|A0A0G2JF85|A0A0G2JF85_MOUSE Sorting nexin family member 27 OS=Mus musculus OX=10090 GN=Snx27 PE=1 SV=1;sp|Q3UHD6|SNX27_MOUSE Sorting nex	3	1	1	1	1	1	0	1	1	1	0	1	1	1	1	0	1	1	1	0	1	1	1	1	0	1	1	1	0	1	1	8.2	8.2	8.2	13.067	110	110;435;539	0.004916	1.7613	8.2	8.2	0
A0A0N4SVI0;A0A7D9N0A8;A0A0G2JF96;Q9R109	A0A0N4SVI0;A0A7D9N0A8;A0A0G2JF96;Q9R109	1;1;1;1	1;1;1;1	1;1;1;1	Ornithine decarboxylase antizyme 3	Oaz3	tr|A0A0N4SVI0|A0A0N4SVI0_MOUSE Ornithine decarboxylase antizyme 3 OS=Mus musculus OX=10090 GN=Oaz3 PE=1 SV=2;tr|A0A7D9N0A8|A0A7D9N0A8_MOUSE Ornithine decarboxylase antizyme 3 OS=Mus musculus OX=10090 GN=Oaz3 PE=1 SV=1;tr|A0A0G2JF96|A0A0G2JF96_MOUSE Ornithi	4	1	1	1	0	0	0	0	0	1	1	0	1	0	0	0	0	0	1	1	0	1	0	0	0	0	0	1	1	0	1	8.2	8.2	8.2	16.761	147	147;242;243;243	0	4.2342	0	0	0
A0A0G2JFF1	A0A0G2JFF1	11	1	1			tr|A0A0G2JFF1|A0A0G2JFF1_MOUSE Serine/threonine-protein phosphatase (Fragment) OS=Mus musculus OX=10090 GN=Ppp1cc PE=1 SV=1	1	11	1	1	4	4	5	5	6	5	8	8	9	1	1	1	1	1	1	1	1	1	1	1	1	1	1	1	1	1	1	39.4	3.8	3.8	33.201	292	292	0	4.4373	12.3	16.1	16.1
A0A0G2JFJ6;Q7TPD0	A0A0G2JFJ6;Q7TPD0	5;5	5;5	5;5	Integrator complex subunit 3	Ints3	tr|A0A0G2JFJ6|A0A0G2JFJ6_MOUSE Integrator complex subunit 3 OS=Mus musculus OX=10090 GN=Ints3 PE=1 SV=1;sp|Q7TPD0|INT3_MOUSE Integrator complex subunit 3 OS=Mus musculus OX=10090 GN=Ints3 PE=1 SV=2	2	5	5	5	0	0	0	1	0	2	4	2	4	0	0	0	1	0	2	4	2	4	0	0	0	1	0	2	4	2	4	6.4	6.4	6.4	117.25	1035	1035;1041	0	25.658	0	0	0
A0A0G2JFT8;Q9D394	A0A0G2JFT8;Q9D394	1;1	1;1	1;1	Protein RUFY3	Rufy3	tr|A0A0G2JFT8|A0A0G2JFT8_MOUSE RUN and FYVE domain containing 3 OS=Mus musculus OX=10090 GN=Rufy3 PE=1 SV=1;sp|Q9D394|RUFY3_MOUSE Protein RUFY3 OS=Mus musculus OX=10090 GN=Rufy3 PE=1 SV=1	2	1	1	1	0	0	0	0	0	0	0	1	0	0	0	0	0	0	0	0	1	0	0	0	0	0	0	0	0	1	0	1.6	1.6	1.6	74.769	669	669;469	0.0021664	2.1877	0	0	0
A0A0G2JFV9;Q9JHI7	A0A0G2JFV9;Q9JHI7	2;2	2;2	2;2	Exosome complex component RRP45	Exosc9	tr|A0A0G2JFV9|A0A0G2JFV9_MOUSE Exosome component 9 (Fragment) OS=Mus musculus OX=10090 GN=Exosc9 PE=1 SV=1;sp|Q9JHI7|EXOS9_MOUSE Exosome complex component RRP45 OS=Mus musculus OX=10090 GN=Exosc9 PE=1 SV=1	2	2	2	2	0	0	0	1	1	1	1	2	2	0	0	0	1	1	1	1	2	2	0	0	0	1	1	1	1	2	2	15.9	15.9	15.9	14.706	132	132;438	0.00088496	2.3202	0	0	0
A0A0G2JFW6;Q6NXI6	A0A0G2JFW6;Q6NXI6	1;1	1;1	1;1	Regulation of nuclear pre-mRNA domain-containing protein 2	Rprd2	tr|A0A0G2JFW6|A0A0G2JFW6_MOUSE Regulation of nuclear pre-mRNA domain containing 2 (Fragment) OS=Mus musculus OX=10090 GN=Rprd2 PE=1 SV=1;sp|Q6NXI6|RPRD2_MOUSE Regulation of nuclear pre-mRNA domain-containing protein 2 OS=Mus musculus OX=10090 GN=Rprd2 PE=1	2	1	1	1	0	0	0	0	0	0	1	0	0	0	0	0	0	0	0	1	0	0	0	0	0	0	0	0	1	0	0	1	1	1	147.62	1386	1386;1469	0.004904	1.747	0	0	0
A0A0G2JFZ8;Q9D2F7	A0A0G2JFZ8;Q9D2F7	2;2	2;2	2;2	Nuclear pore membrane glycoprotein 210-like	Nup210l	tr|A0A0G2JFZ8|A0A0G2JFZ8_MOUSE Nucleoporin 210-like OS=Mus musculus OX=10090 GN=Nup210l PE=1 SV=1;sp|Q9D2F7|P210L_MOUSE Nuclear pore membrane glycoprotein 210-like OS=Mus musculus OX=10090 GN=Nup210l PE=1 SV=2	2	2	2	2	1	2	0	0	0	1	1	0	1	1	2	0	0	0	1	1	0	1	1	2	0	0	0	1	1	0	1	1.3	1.3	1.3	208.7	1881	1881;1881	0.00046598	2.7183	0.6	1.3	0
A0A0G2JGQ4;P54729	A0A0G2JGQ4;P54729	1;1	1;1	1;1	NEDD8 ultimate buster 1	Nub1	tr|A0A0G2JGQ4|A0A0G2JGQ4_MOUSE Negative regulator of ubiquitin-like proteins 1 OS=Mus musculus OX=10090 GN=Nub1 PE=1 SV=1;sp|P54729|NUB1_MOUSE NEDD8 ultimate buster 1 OS=Mus musculus OX=10090 GN=Nub1 PE=1 SV=2	2	1	1	1	0	0	0	0	0	0	1	1	0	0	0	0	0	0	0	1	1	0	0	0	0	0	0	0	1	1	0	1.9	1.9	1.9	73.116	638	638;614	0.00089008	2.3714	0	0	0
E9Q1V9;E9Q1W0;E9Q1T1;A0A0G2JGS4;Q6PHZ2;Q8CCM0;E9QAJ4;D6RDQ8;E9PXV3;F6RWZ9	E9Q1V9;E9Q1W0;E9Q1T1;A0A0G2JGS4;Q6PHZ2;Q8CCM0;E9QAJ4;D6RDQ8	4;4;4;4;4;3;2;2;1;1	2;2;2;2;2;1;1;1;1;1	2;2;2;2;2;1;1;1;1;1	Calcium/calmodulin-dependent protein kinase type II subunit delta	Camk2d	tr|E9Q1V9|E9Q1V9_MOUSE calcium/calmodulin-dependent protein kinase OS=Mus musculus OX=10090 GN=Camk2d PE=1 SV=2;tr|E9Q1W0|E9Q1W0_MOUSE calcium/calmodulin-dependent protein kinase OS=Mus musculus OX=10090 GN=Camk2d PE=1 SV=2;tr|E9Q1T1|E9Q1T1_MOUSE calcium/c	10	4	2	2	0	0	0	1	1	0	2	2	3	0	0	0	0	0	0	1	0	1	0	0	0	0	0	0	1	0	1	8.8	4.5	4.5	55.293	488	488;512;533;533;499;361;142;147;160;169	0.0041597	1.8372	0	0	0
A0A0G2JGU3;A0A0G2JEN9	A0A0G2JGU3;A0A0G2JEN9	2;1	1;1	1;1			tr|A0A0G2JGU3|A0A0G2JGU3_MOUSE DEAH (Asp-Glu-Ala-His) box polypeptide 30 (Fragment) OS=Mus musculus OX=10090 GN=Dhx30 PE=1 SV=1;tr|A0A0G2JEN9|A0A0G2JEN9_MOUSE DEAH (Asp-Glu-Ala-His) box polypeptide 30 (Fragment) OS=Mus musculus OX=10090 GN=Dhx30 PE=1 SV=1	2	2	1	1	0	0	0	2	0	2	1	1	1	0	0	0	1	0	1	1	1	1	0	0	0	1	0	1	1	1	1	51	18.4	18.4	5.6475	49	49;12	0.0071942	1.5956	0	0	0
Q3TUE1;A0A0G2JGW9;A0A0G2JFY5;Q3UUU2;Q91WJ8;A0A0G2JG00;A0A0G2JFK2;A0A0G2JE55;A0A0G2JG96;A0A0G2JGT1;A0A0G2JGV9	Q3TUE1;A0A0G2JGW9;A0A0G2JFY5;Q3UUU2;Q91WJ8;A0A0G2JG00	33;33;32;32;32;29;15;4;3;3;1	28;28;27;27;27;26;14;2;3;1;1	28;28;27;27;27;26;14;2;3;1;1	Far upstream element-binding protein 1	Fubp1	tr|Q3TUE1|Q3TUE1_MOUSE Far upstream element (FUSE) binding protein 1 OS=Mus musculus OX=10090 GN=Fubp1 PE=1 SV=1;tr|A0A0G2JGW9|A0A0G2JGW9_MOUSE Far upstream element (FUSE) binding protein 1 OS=Mus musculus OX=10090 GN=Fubp1 PE=1 SV=1;tr|A0A0G2JFY5|A0A0G2JF	11	33	28	28	0	0	1	27	29	30	22	23	24	0	0	1	22	24	25	18	18	20	0	0	1	22	24	25	18	18	20	52.5	48.1	48.1	67.443	642	642;643;654;700;651;523;306;142;149;157;69	0	188.01	0	0	1.6
A0A0G2JGY7;A0A0G2JEN0	A0A0G2JGY7	10;1	1;1	1;1			tr|A0A0G2JGY7|A0A0G2JGY7_MOUSE DEAH (Asp-Glu-Ala-His) box polypeptide 30 (Fragment) OS=Mus musculus OX=10090 GN=Dhx30 PE=1 SV=1	2	10	1	1	0	0	0	9	8	10	7	7	9	0	0	0	1	0	1	0	0	1	0	0	0	1	0	1	0	0	1	50	9	9	14.051	134	134;73	0.004914	1.754	0	0	0
A0A0G2JH12;Q6P9N1	A0A0G2JH12;Q6P9N1	2;2	2;2	2;2	Hyccin	Fam126a	tr|A0A0G2JH12|A0A0G2JH12_MOUSE Hyccin PI4KA lipid kinase complex subunit 1 OS=Mus musculus OX=10090 GN=Hycc1 PE=1 SV=1;sp|Q6P9N1|HYCCI_MOUSE Hyccin OS=Mus musculus OX=10090 GN=Hycc1 PE=1 SV=3	2	2	2	2	1	1	0	1	1	1	0	1	2	1	1	0	1	1	1	0	1	2	1	1	0	1	1	1	0	1	2	7.4	7.4	7.4	37.228	338	338;521	0	3.6324	5	5	0
K3W4P2;A0A0G2JH17;Q6P4S8;A0A0G2JFR3	K3W4P2;A0A0G2JH17;Q6P4S8	6;6;6;1	6;6;6;1	6;6;6;1	Integrator complex subunit 1	Ints1	tr|K3W4P2|K3W4P2_MOUSE Integrator complex subunit 1 OS=Mus musculus OX=10090 GN=Ints1 PE=1 SV=3;tr|A0A0G2JH17|A0A0G2JH17_MOUSE Integrator complex subunit 1 OS=Mus musculus OX=10090 GN=Ints1 PE=1 SV=1;sp|Q6P4S8|INT1_MOUSE Integrator complex subunit 1 OS=Mus	4	6	6	6	0	0	0	0	0	1	5	3	3	0	0	0	0	0	1	5	3	3	0	0	0	0	0	1	5	3	3	3.5	3.5	3.5	244.91	2193	2193;2222;2195;137	0	12.852	0	0	0
A0A0H2UH17;A0A0G2JDV6;A0A0G2JG47;A0A0G2JGD0;A0A0G2JDT1;A0A0G2JFN7;A0A0G2JE24	A0A0H2UH17;A0A0G2JDV6	26;24;8;6;4;4;3	2;0;0;0;0;0;0	2;0;0;0;0;0;0			tr|A0A0H2UH17|A0A0H2UH17_MOUSE Ubiquitin-associated protein 2-like OS=Mus musculus OX=10090 GN=Ubap2l PE=1 SV=1;tr|A0A0G2JDV6|A0A0G2JDV6_MOUSE Ubiquitin-associated protein 2-like OS=Mus musculus OX=10090 GN=Ubap2l PE=1 SV=1	7	26	2	2	5	6	4	11	7	10	18	21	21	0	0	0	0	0	0	1	2	1	0	0	0	0	0	0	1	2	1	39.1	3.8	3.8	103.94	983	983;1067;105;81;57;497;50	0	17.517	5.9	8.3	4.8
E9Q969;A0A0H2UH22;Q812E0	E9Q969;A0A0H2UH22;Q812E0	7;7;7	2;2;2	2;2;2	Cytoplasmic polyadenylation element-binding protein 2	Cpeb2	tr|E9Q969|E9Q969_MOUSE Cytoplasmic polyadenylation element binding protein 2 OS=Mus musculus OX=10090 GN=Cpeb2 PE=1 SV=2;tr|A0A0H2UH22|A0A0H2UH22_MOUSE Cytoplasmic polyadenylation element binding protein 2 OS=Mus musculus OX=10090 GN=Cpeb2 PE=1 SV=2;sp|Q81	3	7	2	2	0	0	0	3	2	6	4	3	3	0	0	0	1	0	1	0	0	0	0	0	0	1	0	1	0	0	0	8.2	2.3	2.3	108.34	1022	1022;1014;521	0	5.3004	0	0	0
A0A0H2UH27	A0A0H2UH27	39	1	1			tr|A0A0H2UH27|A0A0H2UH27_MOUSE FMR1 autosomal homolog 1 OS=Mus musculus OX=10090 GN=Fxr1 PE=1 SV=1	1	39	1	1	10	10	14	19	16	15	34	34	36	0	0	0	0	0	0	1	1	1	0	0	0	0	0	0	1	1	1	67.4	2.9	2.9	51.014	454	454	0	2.8498	18.9	23.6	28.6
A0A0J9YTY0;A0A0J9YUL3;Q8C1B7	A0A0J9YTY0;A0A0J9YUL3;Q8C1B7	1;1;1	1;1;1	1;1;1	Septin-11	2024-09-11	tr|A0A0J9YTY0|A0A0J9YTY0_MOUSE Septin OS=Mus musculus OX=10090 GN=Septin11 PE=1 SV=1;tr|A0A0J9YUL3|A0A0J9YUL3_MOUSE Septin OS=Mus musculus OX=10090 GN=Septin11 PE=1 SV=1;sp|Q8C1B7|SEP11_MOUSE Septin-11 OS=Mus musculus OX=10090 GN=Septin11 PE=1 SV=4	3	1	1	1	0	0	0	0	0	1	1	1	1	0	0	0	0	0	1	1	1	1	0	0	0	0	0	1	1	1	1	3.1	3.1	3.1	48.978	425	425;432;431	0.00089326	2.3999	0	0	0
A0A0J9YU67;F8WJA5;Q61474	A0A0J9YU67;F8WJA5;Q61474	3;3;3	3;3;3	3;3;3	RNA-binding protein Musashi homolog 1	Msi1	tr|A0A0J9YU67|A0A0J9YU67_MOUSE Musashi RNA-binding protein 1 (Fragment) OS=Mus musculus OX=10090 GN=Msi1 PE=1 SV=1;tr|F8WJA5|F8WJA5_MOUSE Musashi RNA-binding protein 1 (Fragment) OS=Mus musculus OX=10090 GN=Msi1 PE=1 SV=1;sp|Q61474|MSI1H_MOUSE RNA-binding	3	3	3	3	0	0	0	0	1	2	3	0	2	0	0	0	0	1	2	3	0	2	0	0	0	0	1	2	3	0	2	11.5	11.5	11.5	29.383	269	269;325;362	0	8.0525	0	0	0
A0A0J9YUD5;B9EJ54;E9Q880	A0A0J9YUD5;B9EJ54	19;19;5	19;19;5	19;19;5		Nup205	tr|A0A0J9YUD5|A0A0J9YUD5_MOUSE Nucleoporin 205 OS=Mus musculus OX=10090 GN=Nup205 PE=1 SV=1;tr|B9EJ54|B9EJ54_MOUSE Nucleoporin 205 OS=Mus musculus OX=10090 GN=Nup205 PE=1 SV=1	3	19	19	19	1	0	1	3	4	6	9	9	7	1	0	1	3	4	6	9	9	7	1	0	1	3	4	6	9	9	7	12.4	12.4	12.4	233.1	2061	2061;2008;322	0	34.136	0.5	0	0.5
A0A0J9YUT8;Q8R3C6	A0A0J9YUT8;Q8R3C6	3;3	3;3	3;3	Probable RNA-binding protein 19	Rbm19	tr|A0A0J9YUT8|A0A0J9YUT8_MOUSE RNA binding motif protein 19 OS=Mus musculus OX=10090 GN=Rbm19 PE=1 SV=1;sp|Q8R3C6|RBM19_MOUSE Probable RNA-binding protein 19 OS=Mus musculus OX=10090 GN=Rbm19 PE=1 SV=1	2	3	3	3	0	0	0	1	1	1	0	1	1	0	0	0	1	1	1	0	1	1	0	0	0	1	1	1	0	1	1	5.3	5.3	5.3	96.654	870	870;952	0	4.5827	0	0	0
A0A0J9YUZ4;P63158;A0A0J9YUD8;D3YZ18;D3YVC6	A0A0J9YUZ4;P63158;A0A0J9YUD8;D3YZ18	11;11;9;6;4	6;6;6;3;1	6;6;6;3;1	High mobility group protein B1	Hmgb1	tr|A0A0J9YUZ4|A0A0J9YUZ4_MOUSE High mobility group box 1 (Fragment) OS=Mus musculus OX=10090 GN=Hmgb1 PE=1 SV=1;sp|P63158|HMGB1_MOUSE High mobility group protein B1 OS=Mus musculus OX=10090 GN=Hmgb1 PE=1 SV=2;tr|A0A0J9YUD8|A0A0J9YUD8_MOUSE High mobility gr	5	11	6	6	0	0	0	1	2	2	9	8	9	0	0	0	0	1	0	4	4	5	0	0	0	0	1	0	4	4	5	38.9	25.6	25.6	24.233	211	211;215;171;124;92	0	12.706	0	0	0
A0A494BBI7;A0A0N4SUH4;Q8BKS9;A0A494BB98	A0A494BBI7;A0A0N4SUH4;Q8BKS9;A0A494BB98	3;3;3;2	3;3;3;2	3;3;3;2	Pumilio domain-containing protein KIAA0020	Kiaa0020	tr|A0A494BBI7|A0A494BBI7_MOUSE Pumilio RNA-binding family member 3 (Fragment) OS=Mus musculus OX=10090 GN=Pum3 PE=1 SV=1;tr|A0A0N4SUH4|A0A0N4SUH4_MOUSE Pumilio RNA-binding family member 3 OS=Mus musculus OX=10090 GN=Pum3 PE=1 SV=1;sp|Q8BKS9|PUM3_MOUSE Pumi	4	3	3	3	1	0	0	0	0	0	0	0	2	1	0	0	0	0	0	0	0	2	1	0	0	0	0	0	0	0	2	9.7	9.7	9.7	46.401	404	404;648;647;300	0	6.3211	2.5	0	0
E0CX54;A0A0N4SW33;A0A0N4SUN7;A0A0N4SUQ3;E0CZ06;E9QKB7;Q8BTM9	E0CX54;A0A0N4SW33;A0A0N4SUN7;A0A0N4SUQ3;E0CZ06;E9QKB7;Q8BTM9	2;2;2;2;2;2;2	2;2;2;2;2;2;2	2;2;2;2;2;2;2	RAS guanyl-releasing protein 4	Rasgrp4	tr|E0CX54|E0CX54_MOUSE RAS guanyl releasing protein 4 (Fragment) OS=Mus musculus OX=10090 GN=Rasgrp4 PE=1 SV=4;tr|A0A0N4SW33|A0A0N4SW33_MOUSE RAS guanyl releasing protein 4 OS=Mus musculus OX=10090 GN=Rasgrp4 PE=1 SV=1;tr|A0A0N4SUN7|A0A0N4SUN7_MOUSE RAS gu	7	2	2	2	0	0	0	1	2	0	0	0	0	0	0	0	1	2	0	0	0	0	0	0	0	1	2	0	0	0	0	3.3	3.3	3.3	48.107	429	429;581;604;639;659;679;673	0	3.0235	0	0	0
A0A0N4SUQ9;A0A0R4J1G3;A0A0R4J0S9;Q6TDU8	A0A0N4SUQ9;A0A0R4J1G3;A0A0R4J0S9;Q6TDU8	3;3;3;3	3;3;3;3	3;3;3;3	Protein CASC1	Casc1	tr|A0A0N4SUQ9|A0A0N4SUQ9_MOUSE Dynein axonemal intermediate chain 7 OS=Mus musculus OX=10090 GN=Dnai7 PE=1 SV=1;tr|A0A0R4J1G3|A0A0R4J1G3_MOUSE Dynein axonemal intermediate chain 7 OS=Mus musculus OX=10090 GN=Dnai7 PE=1 SV=1;tr|A0A0R4J0S9|A0A0R4J0S9_MOUSE D	4	3	3	3	0	0	0	0	0	0	2	1	3	0	0	0	0	0	0	2	1	3	0	0	0	0	0	0	2	1	3	5.6	5.6	5.6	74.742	644	644;679;730;730	0	11.037	0	0	0
A0A0N4SUU0;A0A0N4SWD7;E9Q6H8;A0A0N4SUY3;A0A0N4SWF5;A0A0N4SV65;A0A0N4SUV0;A0A0N4SW19;A0A1L1SQF5;A0A0N4SVR9	A0A0N4SUU0;A0A0N4SWD7;E9Q6H8;A0A0N4SUY3;A0A0N4SWF5;A0A0N4SV65;A0A0N4SUV0;A0A0N4SW19	9;9;9;8;8;7;5;5;4;2	9;9;9;8;8;7;5;5;4;2	9;9;9;8;8;7;5;5;4;2		Plekha5	tr|A0A0N4SUU0|A0A0N4SUU0_MOUSE Pleckstrin homology domain containing, family A member 5 (Fragment) OS=Mus musculus OX=10090 GN=Plekha5 PE=1 SV=1;tr|A0A0N4SWD7|A0A0N4SWD7_MOUSE Pleckstrin homology domain containing, family A member 5 (Fragment) OS=Mus muscu	10	9	9	9	1	1	2	2	5	5	2	2	1	1	1	2	2	5	5	2	2	1	1	1	2	2	5	5	2	2	1	10.6	10.6	10.6	108.47	956	956;1000;1269;668;770;662;525;531;596;324	0	11.436	1	1.4	2.4
S4R1F2;D3Z0S1;A0A0N4SV57;A0A0N4SW89;P97429;F7ANV6	S4R1F2;D3Z0S1;A0A0N4SV57;A0A0N4SW89;P97429;F7ANV6	2;2;2;2;2;1	2;2;2;2;2;1	2;2;2;2;2;1	Annexin;Annexin A4	Anxa4	tr|S4R1F2|S4R1F2_MOUSE Annexin OS=Mus musculus OX=10090 GN=Anxa4 PE=1 SV=1;tr|D3Z0S1|D3Z0S1_MOUSE Annexin (Fragment) OS=Mus musculus OX=10090 GN=Anxa4 PE=1 SV=1;tr|A0A0N4SV57|A0A0N4SV57_MOUSE Annexin (Fragment) OS=Mus musculus OX=10090 GN=Anxa4 PE=1 SV=1;t	6	2	2	2	2	0	2	0	0	0	0	0	0	2	0	2	0	0	0	0	0	0	2	0	2	0	0	0	0	0	0	13.8	13.8	13.8	21.867	196	196;254;258;273;319;215	0.0034043	2.0394	13.8	0	13.8
Q8CGP6;C0HKE7;C0HKE1;C0HKE2;C0HKE3;C0HKE4;C0HKE5;C0HKE6;C0HKE9;A0A0N4SV66;Q8CGP4;C0HKE8;Q8BFU2;Q8CGP5;Q8CGP7;Q8R1M2;G3UWL7	Q8CGP6;C0HKE7;C0HKE1;C0HKE2;C0HKE3;C0HKE4;C0HKE5;C0HKE6;C0HKE9;A0A0N4SV66;Q8CGP4;C0HKE8;Q8BFU2;Q8CGP5;Q8CGP7;Q8R1M2	7;7;7;7;7;7;7;7;7;7;7;7;7;7;7;7;1	2;2;2;2;2;2;2;2;2;2;2;2;2;2;2;2;0	2;2;2;2;2;2;2;2;2;2;2;2;2;2;2;2;0	Histone H2A type 1-H;Histone H2A;Histone H2A type 3;Histone H2A type 1-F;Histone H2A type 1-K;Histone H2A.J	Hist1h2ah;Hist1h2aa;Hist3h2a;Hist1h2af;Hist1h2ak;H2afj	sp|Q8CGP6|H2A1H_MOUSE Histone H2A type 1-H OS=Mus musculus OX=10090 GN=H2ac12 PE=1 SV=3;sp|C0HKE7|H2A1N_MOUSE Histone H2A type 1-N OS=Mus musculus OX=10090 GN=Hist1h2an PE=1 SV=1;sp|C0HKE1|H2A1B_MOUSE Histone H2A type 1-B OS=Mus musculus OX=10090 GN=H2ac4	17	7	2	2	5	6	5	7	5	5	6	6	7	1	2	2	2	2	2	2	2	2	1	2	2	2	2	2	2	2	2	36.7	14.1	14.1	13.95	128	128;130;130;130;130;130;130;130;130;126;129;130;130;130;130;129;87	0	113.03	35.9	35.9	21.1
A0A0N4SV80;E9QML5;Q61464;A0A0N4SV38;A0A0N4SVI8;E9QKZ7;A0A0N4SVM8;Q3TZK9;A0A0N4SUP3;A0A0N4SWG8	A0A0N4SV80;E9QML5;Q61464;A0A0N4SV38;A0A0N4SVI8;E9QKZ7;A0A0N4SVM8;Q3TZK9	30;30;30;25;25;25;18;18;5;1	30;30;30;25;25;25;18;18;5;1	30;30;30;25;25;25;18;18;5;1	Zinc finger protein 638	Zfml;Znf638	tr|A0A0N4SV80|A0A0N4SV80_MOUSE Zinc finger protein 638 OS=Mus musculus OX=10090 GN=Zfp638 PE=1 SV=1;tr|E9QML5|E9QML5_MOUSE Zinc finger protein 638 OS=Mus musculus OX=10090 GN=Zfp638 PE=1 SV=2;sp|Q61464|ZN638_MOUSE Zinc finger protein 638 OS=Mus musculus OX	10	30	30	30	1	1	0	13	12	12	18	21	20	1	1	0	13	12	12	18	21	20	1	1	0	13	12	12	18	21	20	20.6	20.6	20.6	214.46	1926	1926;1960;1960;1239;1273;1275;832;891;266;185	0	137.98	0.6	0.6	0
A0A0N4SVC2;E9QP00;Q6PFR5	A0A0N4SVC2;E9QP00;Q6PFR5	5;5;5	4;4;4	4;4;4	Transformer-2 protein homolog alpha	Tra2a	tr|A0A0N4SVC2|A0A0N4SVC2_MOUSE Transformer 2 alpha OS=Mus musculus OX=10090 GN=Tra2a PE=1 SV=1;tr|E9QP00|E9QP00_MOUSE Transformer 2 alpha OS=Mus musculus OX=10090 GN=Tra2a PE=1 SV=1;sp|Q6PFR5|TRA2A_MOUSE Transformer-2 protein homolog alpha OS=Mus musculus	3	5	4	4	0	0	0	5	4	4	3	4	4	0	0	0	4	3	3	3	3	3	0	0	0	4	3	3	3	3	3	15.4	11.8	11.8	32.259	280	280;282;281	0	13.292	0	0	0
A0A0N4SVE2;A0A0N4SVL9;Q9CQR6	A0A0N4SVE2;A0A0N4SVL9;Q9CQR6	1;1;1	1;1;1	1;1;1	Serine/threonine-protein phosphatase 6 catalytic subunit;Serine/threonine-protein phosphatase 6 catalytic subunit, N-terminally processed	Ppp6c	tr|A0A0N4SVE2|A0A0N4SVE2_MOUSE Protein phosphatase 6, catalytic subunit OS=Mus musculus OX=10090 GN=Ppp6c PE=1 SV=1;tr|A0A0N4SVL9|A0A0N4SVL9_MOUSE Serine/threonine-protein phosphatase OS=Mus musculus OX=10090 GN=Ppp6c PE=1 SV=1;sp|Q9CQR6|PPP6_MOUSE Serine/	3	1	1	1	1	1	1	0	0	1	0	0	0	1	1	1	0	0	1	0	0	0	1	1	1	0	0	1	0	0	0	16	16	16	9.1036	81	81;283;305	0.00046211	2.6495	16	16	16
A0A0N4SVK3;P62322	A0A0N4SVK3;P62322	2;2	2;2	2;2	U6 snRNA-associated Sm-like protein LSm5	Lsm5	tr|A0A0N4SVK3|A0A0N4SVK3_MOUSE LSM5 homolog, U6 small nuclear RNA and mRNA degradation associated OS=Mus musculus OX=10090 GN=Lsm5 PE=1 SV=1;sp|P62322|LSM5_MOUSE U6 snRNA-associated Sm-like protein LSm5 OS=Mus musculus OX=10090 GN=Lsm5 PE=3 SV=2	2	2	2	2	0	0	0	0	0	0	1	2	1	0	0	0	0	0	0	1	2	1	0	0	0	0	0	0	1	2	1	40.7	40.7	40.7	6.6106	59	59;91	0	8.8356	0	0	0
A0A0N4SVL0;A2AMI2;Q80XI3;A2AMI6;A2AMI4;Q8BQR8	A0A0N4SVL0;A2AMI2;Q80XI3	59;57;57;4;1;1	59;57;57;4;1;1	4;2;2;0;0;0	Eukaryotic translation initiation factor 4 gamma 3	Eif4g3	tr|A0A0N4SVL0|A0A0N4SVL0_MOUSE Eukaryotic translation initiation factor 4 gamma, 3 OS=Mus musculus OX=10090 GN=Eif4g3 PE=1 SV=2;tr|A2AMI2|A2AMI2_MOUSE Eukaryotic translation initiation factor 4 gamma, 3 OS=Mus musculus OX=10090 GN=Eif4g3 PE=1 SV=1;sp|Q80XI	6	59	59	4	9	9	7	48	45	47	39	39	40	9	9	7	48	45	47	39	39	40	0	0	0	3	4	4	3	1	2	34.3	34.3	4.1	192.85	1762	1762;1579;1579;509;183;235	0	323.31	5.7	6	4.5
A0A0N4SVL4;Q3UQI9	A0A0N4SVL4;Q3UQI9	1;1	1;1	1;1	Protein FAM188B	Fam188b	tr|A0A0N4SVL4|A0A0N4SVL4_MOUSE Ubiquitin carboxyl-terminal hydrolase MINDY OS=Mus musculus OX=10090 GN=Mindy4 PE=1 SV=1;sp|Q3UQI9|MINY4_MOUSE Probable ubiquitin carboxyl-terminal hydrolase MINDY-4 OS=Mus musculus OX=10090 GN=Mindy4 PE=1 SV=1	2	1	1	1	0	0	0	0	0	0	1	1	0	0	0	0	0	0	0	1	1	0	0	0	0	0	0	0	1	1	0	4.3	4.3	4.3	66.755	600	600;744	0	3.0997	0	0	0
A0A0N4SVQ1;Q62425	A0A0N4SVQ1;Q62425	2;2	2;2	2;2	Cytochrome c oxidase subunit NDUFA4	Ndufa4	tr|A0A0N4SVQ1|A0A0N4SVQ1_MOUSE Ndufa4, mitochondrial complex associated OS=Mus musculus OX=10090 GN=Ndufa4 PE=1 SV=1;sp|Q62425|NDUA4_MOUSE Cytochrome c oxidase subunit NDUFA4 OS=Mus musculus OX=10090 GN=Ndufa4 PE=1 SV=2	2	2	2	2	2	2	0	1	1	1	1	1	2	2	2	0	1	1	1	1	1	2	2	2	0	1	1	1	1	1	2	44.9	44.9	44.9	5.8765	49	49;82	0	3.0974	44.9	44.9	0
A0A0N4SVS6	A0A0N4SVS6	11	11	2			tr|A0A0N4SVS6|A0A0N4SVS6_MOUSE Cellular nucleic acid binding protein OS=Mus musculus OX=10090 GN=Cnbp PE=1 SV=1	1	11	11	2	2	1	1	10	10	11	9	9	9	2	1	1	10	10	11	9	9	9	0	0	0	1	2	2	2	2	2	62	62	13.5	18.799	171	171	0	323.31	12.3	4.7	4.7
A0A0N4SVT8	A0A0N4SVT8	2	2	1			tr|A0A0N4SVT8|A0A0N4SVT8_MOUSE DnaJ heat shock protein family (Hsp40) member B8 (Fragment) OS=Mus musculus OX=10090 GN=Dnajb8 PE=1 SV=1	1	2	2	1	1	1	1	0	0	1	0	0	0	1	1	1	0	0	1	0	0	0	0	0	0	0	0	1	0	0	0	30.1	30.1	11.8	9.859	93	93	0.004892	1.7362	18.3	18.3	18.3
A0A0N4SW73;Q8R361	A0A0N4SW73;Q8R361	2;2	2;2	2;2	Rab11 family-interacting protein 5	Rab11fip5	tr|A0A0N4SW73|A0A0N4SW73_MOUSE RAB11 family interacting protein 5 (class I) OS=Mus musculus OX=10090 GN=Rab11fip5 PE=1 SV=1;sp|Q8R361|RFIP5_MOUSE Rab11 family-interacting protein 5 OS=Mus musculus OX=10090 GN=Rab11fip5 PE=1 SV=2	2	2	2	2	0	0	0	0	0	1	1	1	2	0	0	0	0	0	1	1	1	2	0	0	0	0	0	1	1	1	2	2	2	2	139.55	1318	1318;645	0	3.5736	0	0	0
A0A0N5E9G7;G3X8Z6;Q5U4B1;G3UWX1;P35601	A0A0N5E9G7;G3X8Z6;Q5U4B1;G3UWX1;P35601	1;1;1;1;1	1;1;1;1;1	1;1;1;1;1	Replication factor C subunit 1	Rfc1	tr|A0A0N5E9G7|A0A0N5E9G7_MOUSE Replication factor C subunit 1 OS=Mus musculus OX=10090 GN=Rfc1 PE=1 SV=1;tr|G3X8Z6|G3X8Z6_MOUSE Replication factor C subunit 1 OS=Mus musculus OX=10090 GN=Rfc1 PE=1 SV=1;tr|Q5U4B1|Q5U4B1_MOUSE Replication factor C subunit 1	5	1	1	1	0	0	0	0	0	0	1	1	1	0	0	0	0	0	0	1	1	1	0	0	0	0	0	0	1	1	1	1.1	1.1	1.1	125.86	1130	1130;1131;1132;1145;1131	0	4.8559	0	0	0
A0A0R3P9C8;Q9DC69	A0A0R3P9C8;Q9DC69	12;12	12;12	12;12	NADH dehydrogenase [ubiquinone] 1 alpha subcomplex subunit 9, mitochondrial	Ndufa9	tr|A0A0R3P9C8|A0A0R3P9C8_MOUSE NADH:ubiquinone oxidoreductase subunit A9 OS=Mus musculus OX=10090 GN=Ndufa9 PE=1 SV=1;sp|Q9DC69|NDUA9_MOUSE NADH dehydrogenase [ubiquinone] 1 alpha subcomplex subunit 9, mitochondrial OS=Mus musculus OX=10090 GN=Ndufa9 PE=1	2	12	12	12	1	3	1	2	3	2	7	8	9	1	3	1	2	3	2	7	8	9	1	3	1	2	3	2	7	8	9	41.8	41.8	41.8	42.121	373	373;377	0	45.928	3.5	9.4	3.5
A0A0R4IZY0;Q8C1A5	A0A0R4IZY0;Q8C1A5	3;3	3;3	3;3	Thimet oligopeptidase	Thop1	tr|A0A0R4IZY0|A0A0R4IZY0_MOUSE Thimet oligopeptidase 1 OS=Mus musculus OX=10090 GN=Thop1 PE=1 SV=1;sp|Q8C1A5|THOP1_MOUSE Thimet oligopeptidase OS=Mus musculus OX=10090 GN=Thop1 PE=1 SV=1	2	3	3	3	1	1	2	1	2	2	0	0	0	1	1	2	1	2	2	0	0	0	1	1	2	1	2	2	0	0	0	5.2	5.2	5.2	78.026	687	687;687	0	5.2868	1.6	1.6	3.1
A0A0R4IZY9;Q91XI1	A0A0R4IZY9;Q91XI1	29;28	29;28	29;28	tRNA-dihydrouridine(47) synthase [NAD(P)(+)]-like	Dus3l	tr|A0A0R4IZY9|A0A0R4IZY9_MOUSE tRNA-dihydrouridine(47) synthase [NAD(P)(+)] OS=Mus musculus OX=10090 GN=Dus3l PE=1 SV=1;sp|Q91XI1|DUS3L_MOUSE tRNA-dihydrouridine(47) synthase [NAD(P)(+)]-like OS=Mus musculus OX=10090 GN=Dus3l PE=1 SV=1	2	29	29	29	0	0	0	17	17	21	24	27	23	0	0	0	17	17	21	24	27	23	0	0	0	17	17	21	24	27	23	51	51	51	71.15	637	637;637	0	264.92	0	0	0
A0A0R4J005;A0A5F8MPJ3;E9QP62;Q9D7B2;Q99JW4	A0A0R4J005;A0A5F8MPJ3;E9QP62;Q9D7B2;Q99JW4	1;1;1;1;1	1;1;1;1;1	1;1;1;1;1	LIM and senescent cell antigen-like-containing domain protein 1	Lims1	tr|A0A0R4J005|A0A0R4J005_MOUSE LIM and senescent cell antigen-like-containing domain protein OS=Mus musculus OX=10090 GN=Lims1 PE=1 SV=1;tr|A0A5F8MPJ3|A0A5F8MPJ3_MOUSE LIM and senescent cell antigen-like-containing domain protein OS=Mus musculus OX=10090 G	5	1	1	1	0	0	0	0	1	1	1	1	1	0	0	0	0	1	1	1	1	1	0	0	0	0	1	1	1	1	1	3.6	3.6	3.6	38.387	337	337;362;387;396;325	0.00090539	2.4949	0	0	0
A0A0R4J020;Q3U1U7	A0A0R4J020;Q3U1U7	1;1	1;1	1;1	Aryl hydrocarbon receptor repressor	Ahrr	tr|A0A0R4J020|A0A0R4J020_MOUSE Aryl-hydrocarbon receptor repressor OS=Mus musculus OX=10090 GN=Ahrr PE=4 SV=1;sp|Q3U1U7|AHRR_MOUSE Aryl hydrocarbon receptor repressor OS=Mus musculus OX=10090 GN=Ahrr PE=1 SV=1	2	1	1	1	0	0	0	1	1	1	1	1	1	0	0	0	1	1	1	1	1	1	0	0	0	1	1	1	1	1	1	1.7	1.7	1.7	77.759	701	701;701	1	-2	0	0	0
F6RT60;A0A0R4J023;Q9JLZ3;F6R307	F6RT60;A0A0R4J023;Q9JLZ3;F6R307	4;4;4;3	4;4;4;3	4;4;4;3	Methylglutaconyl-CoA hydratase, mitochondrial	Auh	tr|F6RT60|F6RT60_MOUSE AU RNA binding protein/enoyl-coenzyme A hydratase (Fragment) OS=Mus musculus OX=10090 GN=Auh PE=1 SV=1;tr|A0A0R4J023|A0A0R4J023_MOUSE AU RNA binding protein/enoyl-coenzyme A hydratase OS=Mus musculus OX=10090 GN=Auh PE=1 SV=1;sp|Q9JL	4	4	4	4	0	0	0	1	1	1	3	2	3	0	0	0	1	1	1	3	2	3	0	0	0	1	1	1	3	2	3	21.3	21.3	21.3	25.151	239	239;314;314;219	0	29.052	0	0	0
A0A0R4J034;Q99K01	A0A0R4J034;Q99K01	3;3	3;3	3;3	Pyridoxal-dependent decarboxylase domain-containing protein 1	Pdxdc1	tr|A0A0R4J034|A0A0R4J034_MOUSE Pyridoxal-dependent decarboxylase domain containing 1 OS=Mus musculus OX=10090 GN=Pdxdc1 PE=1 SV=1;sp|Q99K01|PDXD1_MOUSE Pyridoxal-dependent decarboxylase domain-containing protein 1 OS=Mus musculus OX=10090 GN=Pdxdc1 PE=1 SV	2	3	3	3	3	0	1	1	2	3	1	2	1	3	0	1	1	2	3	1	2	1	3	0	1	1	2	3	1	2	1	4.4	4.4	4.4	87.479	789	789;787	0	3.5682	4.4	0	1.8
Q9CYI4;A0A0R4J047;D6RGP6	Q9CYI4;A0A0R4J047	15;15;2	6;6;1	2;2;1	Putative RNA-binding protein Luc7-like 1	Luc7l	sp|Q9CYI4|LUC7L_MOUSE Putative RNA-binding protein Luc7-like 1 OS=Mus musculus OX=10090 GN=Luc7l PE=1 SV=2;tr|A0A0R4J047|A0A0R4J047_MOUSE Luc7-like OS=Mus musculus OX=10090 GN=Luc7l PE=1 SV=1	3	15	6	2	2	0	0	5	4	4	13	12	11	0	0	0	1	1	1	5	4	4	0	0	0	1	1	1	2	2	1	32.9	18.3	7.3	43.934	371	371;325;79	0	24.61	3.8	0	0
E9Q2H8;E9PYA3;A0A0R4J052;G5E8T9;Q99KB8;D3YWI0	E9Q2H8;E9PYA3;A0A0R4J052;G5E8T9;Q99KB8;D3YWI0	2;2;2;2;2;1	2;2;2;2;2;1	2;2;2;2;2;1	Hydroxyacylglutathione hydrolase, mitochondrial	Hagh	tr|E9Q2H8|E9Q2H8_MOUSE Hydroxyacyl glutathione hydrolase (Fragment) OS=Mus musculus OX=10090 GN=Hagh PE=1 SV=1;tr|E9PYA3|E9PYA3_MOUSE Hydroxyacyl glutathione hydrolase (Fragment) OS=Mus musculus OX=10090 GN=Hagh PE=1 SV=1;tr|A0A0R4J052|A0A0R4J052_MOUSE Hyd	6	2	2	2	1	2	2	1	1	1	1	1	1	1	2	2	1	1	1	1	1	1	1	2	2	1	1	1	1	1	1	9.2	9.2	9.2	23.756	217	217;237;260;309;309;167	0	6.7914	5.5	9.2	9.2
A0A0R4J098;O88291;D3YXQ7;D6RG92	A0A0R4J098;O88291;D3YXQ7	16;16;8;1	16;16;8;1	16;16;8;1	DBIRD complex subunit ZNF326	Znf326;Zfp326	tr|A0A0R4J098|A0A0R4J098_MOUSE Zinc finger protein 326 OS=Mus musculus OX=10090 GN=Zfp326 PE=1 SV=1;sp|O88291|ZN326_MOUSE DBIRD complex subunit ZNF326 OS=Mus musculus OX=10090 GN=Znf326 PE=1 SV=1;tr|D3YXQ7|D3YXQ7_MOUSE Zinc finger protein 326 (Fragment) OS	4	16	16	16	0	1	0	11	9	11	11	10	14	0	1	0	11	9	11	11	10	14	0	1	0	11	9	11	11	10	14	30.2	30.2	30.2	65.166	580	580;580;415;53	0	87.761	0	2.1	0
A0A0R4J0B2;Q8VCI0	A0A0R4J0B2;Q8VCI0	8;8	8;8	8;8	Phospholipase B-like 1;Phospholipase B-like 1 chain A;Phospholipase B-like 1 chain B;Phospholipase B-like 1 chain C	Plbd1	tr|A0A0R4J0B2|A0A0R4J0B2_MOUSE Phospholipase B-like OS=Mus musculus OX=10090 GN=Plbd1 PE=1 SV=1;sp|Q8VCI0|PLBL1_MOUSE Phospholipase B-like 1 OS=Mus musculus OX=10090 GN=Plbd1 PE=1 SV=1	2	8	8	8	2	2	1	5	4	4	6	7	6	2	2	1	5	4	4	6	7	6	2	2	1	5	4	4	6	7	6	17.6	17.6	17.6	63.018	550	550;550	0	41.663	4.2	4.2	2.2
A0A0R4J0B4;Q99KK2;A0A0N4SW65;A0A0N4SWC3	A0A0R4J0B4;Q99KK2	11;9;5;4	11;9;5;4	11;9;5;4	N-acylneuraminate cytidylyltransferase	Cmas	tr|A0A0R4J0B4|A0A0R4J0B4_MOUSE N-acylneuraminate cytidylyltransferase OS=Mus musculus OX=10090 GN=Cmas PE=1 SV=1;sp|Q99KK2|NEUA_MOUSE N-acylneuraminate cytidylyltransferase OS=Mus musculus OX=10090 GN=Cmas PE=1 SV=2	4	11	11	11	2	0	1	4	4	3	8	6	10	2	0	1	4	4	3	8	6	10	2	0	1	4	4	3	8	6	10	28.7	28.7	28.7	48.029	432	432;432;86;115	0	33.694	5.6	0	2.8
F6VZ99;A0A0R4J0C0;Q9D720	F6VZ99;A0A0R4J0C0;Q9D720	1;1;1	1;1;1	1;1;1	Non-structural maintenance of chromosomes element 1 homolog	Nsmce1	tr|F6VZ99|F6VZ99_MOUSE Non-structural maintenance of chromosomes element 1 homolog (Fragment) OS=Mus musculus OX=10090 GN=Nsmce1 PE=1 SV=1;tr|A0A0R4J0C0|A0A0R4J0C0_MOUSE Non-structural maintenance of chromosomes element 1 homolog OS=Mus musculus OX=10090 G	3	1	1	1	0	0	0	1	0	0	0	1	1	0	0	0	1	0	0	0	1	1	0	0	0	1	0	0	0	1	1	11.5	11.5	11.5	22.271	200	200;280;266	0	3.1679	0	0	0
D3Z4E0;A0A0R4J0C2;O09046	D3Z4E0;A0A0R4J0C2;O09046	4;4;4	4;4;4	4;4;4	L-amino-acid oxidase	Il4i1	tr|D3Z4E0|D3Z4E0_MOUSE Amine oxidase OS=Mus musculus OX=10090 GN=Il4i1 PE=1 SV=1;tr|A0A0R4J0C2|A0A0R4J0C2_MOUSE Amine oxidase OS=Mus musculus OX=10090 GN=Il4i1 PE=1 SV=1;sp|O09046|OXLA_MOUSE L-amino-acid oxidase OS=Mus musculus OX=10090 GN=Il4i1 PE=1 SV=1	3	4	4	4	0	0	0	1	1	1	3	3	3	0	0	0	1	1	1	3	3	3	0	0	0	1	1	1	3	3	3	6.7	6.7	6.7	71.141	638	638;630;630	0	6.9719	0	0	0
A0A0R4J0C8;Q7TMF2	A0A0R4J0C8;Q7TMF2	2;2	2;2	2;2	3-5 exoribonuclease 1	Eri1	tr|A0A0R4J0C8|A0A0R4J0C8_MOUSE Exoribonuclease 1 OS=Mus musculus OX=10090 GN=Eri1 PE=1 SV=1;sp|Q7TMF2|ERI1_MOUSE 3-5 exoribonuclease 1 OS=Mus musculus OX=10090 GN=Eri1 PE=1 SV=2	2	2	2	2	0	0	0	0	0	0	2	2	1	0	0	0	0	0	0	2	2	1	0	0	0	0	0	0	2	2	1	4.6	4.6	4.6	39.551	345	345;345	0.0072318	1.6351	0	0	0
A0A0R4J0D3;Q3TDQ1	A0A0R4J0D3;Q3TDQ1	14;14	14;14	14;14	Dolichyl-diphosphooligosaccharide--protein glycosyltransferase subunit STT3B	Stt3b	tr|A0A0R4J0D3|A0A0R4J0D3_MOUSE dolichyl-diphosphooligosaccharide--protein glycotransferase OS=Mus musculus OX=10090 GN=Stt3b PE=1 SV=1;sp|Q3TDQ1|STT3B_MOUSE Dolichyl-diphosphooligosaccharide--protein glycosyltransferase subunit STT3B OS=Mus musculus OX=100	2	14	14	14	0	1	2	8	7	7	9	10	9	0	1	2	8	7	7	9	10	9	0	1	2	8	7	7	9	10	9	18.8	18.8	18.8	93.314	823	823;823	0	45.581	0	1.1	2.8
A0A0R4J0F3;Q148A4;A0A494B8Y3;A0A494B9Z9	A0A0R4J0F3;Q148A4;A0A494B8Y3	12;11;8;2	12;11;8;2	12;11;8;2	Protein phosphatase 1 regulatory subunit 32	Ppp1r32	tr|A0A0R4J0F3|A0A0R4J0F3_MOUSE Protein phosphatase 1, regulatory subunit 32 OS=Mus musculus OX=10090 GN=Saxo4 PE=1 SV=1;sp|Q148A4|SAXO4_MOUSE Stabilizer of axonemal microtubules 4 OS=Mus musculus OX=10090 GN=Saxo4 PE=1 SV=1;tr|A0A494B8Y3|A0A494B8Y3_MOUSE P	4	12	12	12	3	2	2	8	7	7	2	4	4	3	2	2	8	7	7	2	4	4	3	2	2	8	7	7	2	4	4	37.9	37.9	37.9	47.799	427	427;427;253;54	0	52.66	9.6	7.3	4.9
A0A2I3BPW9;A0A0R4J0G7;Q8K4R9;A0A2I3BQS1	A0A2I3BPW9;A0A0R4J0G7;Q8K4R9;A0A2I3BQS1	2;2;2;1	2;2;2;1	2;2;2;1	Disks large-associated protein 5	Dlgap5	tr|A0A2I3BPW9|A0A2I3BPW9_MOUSE DLG associated protein 5 OS=Mus musculus OX=10090 GN=Dlgap5 PE=1 SV=1;tr|A0A0R4J0G7|A0A0R4J0G7_MOUSE DLG associated protein 5 OS=Mus musculus OX=10090 GN=Dlgap5 PE=1 SV=1;sp|Q8K4R9|DLGP5_MOUSE Disks large-associated protein 5	4	2	2	2	0	0	0	0	1	0	0	0	1	0	0	0	0	1	0	0	0	1	0	0	0	0	1	0	0	0	1	3.4	3.4	3.4	84.608	758	758;808;808;606	0.0004649	2.697	0	0	0
A0A0R4J0I1;P07759;E9Q499;F2Z405;G3X8T9;P29621;Q91WP6;Q03734;Q5I2A0;Q80X76	A0A0R4J0I1;P07759	5;4;2;2;2;2;2;2;2;1	5;4;2;2;2;2;2;2;2;1	5;4;2;2;2;2;2;2;2;1	Serine protease inhibitor A3K	Serpina3k	tr|A0A0R4J0I1|A0A0R4J0I1_MOUSE Serine (or cysteine) peptidase inhibitor, clade A, member 3K OS=Mus musculus OX=10090 GN=Serpina3k PE=1 SV=1;sp|P07759|SPA3K_MOUSE Serine protease inhibitor A3K OS=Mus musculus OX=10090 GN=Serpina3k PE=1 SV=2	10	5	5	5	3	2	3	0	1	2	0	0	1	3	2	3	0	1	2	0	0	1	3	2	3	0	1	2	0	0	1	15.1	15.1	15.1	46.672	418	418;418;100;248;418;417;418;418;440;445	0	10.87	12.7	6.9	6.9
A0A0R4J0I6;Q80XL6;A0A087WSI8;F6U473;D3YTQ5	A0A0R4J0I6;Q80XL6;A0A087WSI8	5;5;4;2;2	5;5;4;2;2	5;5;4;2;2	Acyl-CoA dehydrogenase family member 11	Acad11	tr|A0A0R4J0I6|A0A0R4J0I6_MOUSE Acyl-Coenzyme A dehydrogenase family, member 11 OS=Mus musculus OX=10090 GN=Acad11 PE=1 SV=1;sp|Q80XL6|ACD11_MOUSE Acyl-CoA dehydrogenase family member 11 OS=Mus musculus OX=10090 GN=Acad11 PE=1 SV=2;tr|A0A087WSI8|A0A087WSI8_	5	5	5	5	0	1	1	3	3	3	3	3	3	0	1	1	3	3	3	3	3	3	0	1	1	3	3	3	3	3	3	6.7	6.7	6.7	87.347	779	779;779;541;122;661	0	12.109	0	1.5	1.5
Q5SVF9;A0A0R4J0J6;Q8BKT7;Q5SVF8	Q5SVF9;A0A0R4J0J6;Q8BKT7	6;6;6;2	6;6;6;2	6;6;6;2	THO complex subunit 5 homolog	Thoc5	tr|Q5SVF9|Q5SVF9_MOUSE THO complex 5 OS=Mus musculus OX=10090 GN=Thoc5 PE=1 SV=1;tr|A0A0R4J0J6|A0A0R4J0J6_MOUSE THO complex 5 OS=Mus musculus OX=10090 GN=Thoc5 PE=1 SV=1;sp|Q8BKT7|THOC5_MOUSE THO complex subunit 5 homolog OS=Mus musculus OX=10090 GN=Thoc5	4	6	6	6	0	0	0	0	0	0	3	3	4	0	0	0	0	0	0	3	3	4	0	0	0	0	0	0	3	3	4	11.2	11.2	11.2	73.012	635	635;683;683;300	0	23.536	0	0	0
Q2KN98;A0A0R4J0J8;A0A1W2P785	Q2KN98;A0A0R4J0J8	7;7;1	7;7;1	7;7;1	Cytospin-A	Specc1l	sp|Q2KN98|CYTSA_MOUSE Cytospin-A OS=Mus musculus OX=10090 GN=Specc1l PE=1 SV=1;tr|A0A0R4J0J8|A0A0R4J0J8_MOUSE Cytospin-A OS=Mus musculus OX=10090 GN=Specc1l PE=1 SV=1	3	7	7	7	5	3	4	1	0	0	0	1	0	5	3	4	1	0	0	0	1	0	5	3	4	1	0	0	0	1	0	8.2	8.2	8.2	124.49	1118	1118;1135;120	0	38.26	6	3.9	4.5
A0A0R4J0K1;Q9ERR7	A0A0R4J0K1;Q9ERR7	2;2	2;2	2;2	15 kDa selenoprotein	2024-09-15	tr|A0A0R4J0K1|A0A0R4J0K1_MOUSE Selenoprotein F OS=Mus musculus OX=10090 GN=Selenof PE=1 SV=1;sp|Q9ERR7|SEP15_MOUSE Selenoprotein F OS=Mus musculus OX=10090 GN=Selenof PE=1 SV=3	2	2	2	2	0	0	1	0	1	1	1	2	1	0	0	1	0	1	1	1	2	1	0	0	1	0	1	1	1	2	1	15.4	15.4	15.4	17.731	162	162;162	0	10.547	0	0	5.6
Z4YL78;A0A0R4J0K2;K3W4R5;A2AGT5	Z4YL78;A0A0R4J0K2;K3W4R5;A2AGT5	66;66;66;65	66;66;66;65	66;66;66;65	Cytoskeleton-associated protein 5	Ckap5	tr|Z4YL78|Z4YL78_MOUSE Cytoskeleton associated protein 5 OS=Mus musculus OX=10090 GN=Ckap5 PE=1 SV=1;tr|A0A0R4J0K2|A0A0R4J0K2_MOUSE Cytoskeleton associated protein 5 OS=Mus musculus OX=10090 GN=Ckap5 PE=1 SV=1;tr|K3W4R5|K3W4R5_MOUSE Cytoskeleton associated	4	66	66	66	11	10	12	23	22	21	50	50	53	11	10	12	23	22	21	50	50	53	11	10	12	23	22	21	50	50	53	36.4	36.4	36.4	218.71	1972	1972;2011;2032;2032	0	229.66	6.9	5.7	7.6
A0A0R4J0M9;Q8CDG3	A0A0R4J0M9;Q8CDG3	3;3	3;3	3;3	Deubiquitinating protein VCIP135	Vcpip1	tr|A0A0R4J0M9|A0A0R4J0M9_MOUSE ubiquitinyl hydrolase 1 OS=Mus musculus OX=10090 GN=Vcpip1 PE=1 SV=1;sp|Q8CDG3|VCIP1_MOUSE Deubiquitinating protein VCPIP1 OS=Mus musculus OX=10090 GN=Vcpip1 PE=1 SV=1	2	3	3	3	0	2	1	1	0	1	2	1	1	0	2	1	1	0	1	2	1	1	0	2	1	1	0	1	2	1	1	2.8	2.8	2.8	134.44	1220	1220;1220	0	3.5944	0	2.1	0.8
Q8VDG3;A0A0R4J0P6;A0A2R8VKA3	Q8VDG3;A0A0R4J0P6	13;13;2	13;13;2	13;13;2	Poly(A)-specific ribonuclease PARN	Parn	sp|Q8VDG3|PARN_MOUSE Poly(A)-specific ribonuclease PARN OS=Mus musculus OX=10090 GN=Parn PE=1 SV=1;tr|A0A0R4J0P6|A0A0R4J0P6_MOUSE Poly(A)-specific ribonuclease PARN OS=Mus musculus OX=10090 GN=Parn PE=1 SV=1	3	13	13	13	0	0	0	10	7	9	6	6	7	0	0	0	10	7	9	6	6	7	0	0	0	10	7	9	6	6	7	19.4	19.4	19.4	71.558	624	624;624;209	0	29.975	0	0	0
A0A0R4J0Q5;P21619	A0A0R4J0Q5;P21619	8;8	3;3	3;3	Lamin-B2	Lmnb2	tr|A0A0R4J0Q5|A0A0R4J0Q5_MOUSE Lamin B2 OS=Mus musculus OX=10090 GN=Lmnb2 PE=1 SV=1;sp|P21619|LMNB2_MOUSE Lamin-B2 OS=Mus musculus OX=10090 GN=Lmnb2 PE=1 SV=2	2	8	3	3	4	3	5	6	2	4	1	5	2	1	1	2	2	0	2	0	3	1	1	1	2	2	0	2	0	3	1	11.2	6.2	6.2	69.084	615	615;596	0	3.5911	5.7	5.7	8
Q80VI1;A0A0R4J0Q6;D3YVX5	Q80VI1;A0A0R4J0Q6;D3YVX5	3;3;2	3;3;2	3;3;2	E3 ubiquitin-protein ligase TRIM56	Trim56	sp|Q80VI1|TRI56_MOUSE E3 ubiquitin-protein ligase TRIM56 OS=Mus musculus OX=10090 GN=Trim56 PE=1 SV=1;tr|A0A0R4J0Q6|A0A0R4J0Q6_MOUSE RING-type E3 ubiquitin transferase OS=Mus musculus OX=10090 GN=Trim56 PE=1 SV=1;tr|D3YVX5|D3YVX5_MOUSE Tripartite motif-con	3	3	3	3	0	0	0	1	0	0	3	2	2	0	0	0	1	0	0	3	2	2	0	0	0	1	0	0	3	2	2	5.4	5.4	5.4	79.512	734	734;734;212	0	5.3018	0	0	0
Q3UM29;A0A0R4J0Q9;Q3TR20	Q3UM29;A0A0R4J0Q9;Q3TR20	2;2;1	2;2;1	2;2;1	Conserved oligomeric Golgi complex subunit 7	Cog7	sp|Q3UM29|COG7_MOUSE Conserved oligomeric Golgi complex subunit 7 OS=Mus musculus OX=10090 GN=Cog7 PE=1 SV=1;tr|A0A0R4J0Q9|A0A0R4J0Q9_MOUSE Conserved oligomeric Golgi complex subunit 7 OS=Mus musculus OX=10090 GN=Cog7 PE=1 SV=1;tr|Q3TR20|Q3TR20_MOUSE Conse	3	2	2	2	1	0	1	0	0	0	0	0	0	1	0	1	0	0	0	0	0	0	1	0	1	0	0	0	0	0	0	2.6	2.6	2.6	86.072	770	770;770;721	0.0049281	1.769	1.3	0	1.3
A0A0R4J0R3;Q3U1G5	A0A0R4J0R3;Q3U1G5	18;18	18;18	18;18	Interferon-stimulated 20 kDa exonuclease-like 2	Isg20l2	tr|A0A0R4J0R3|A0A0R4J0R3_MOUSE Interferon stimulated exonuclease gene 20-like 2 OS=Mus musculus OX=10090 GN=Isg20l2 PE=1 SV=1;sp|Q3U1G5|I20L2_MOUSE Interferon-stimulated 20 kDa exonuclease-like 2 OS=Mus musculus OX=10090 GN=Isg20l2 PE=1 SV=2	2	18	18	18	0	0	0	10	8	9	16	17	15	0	0	0	10	8	9	16	17	15	0	0	0	10	8	9	16	17	15	41.8	41.8	41.8	40.991	368	368;368	0	115.52	0	0	0
A0A0R4J0T5;P28659	A0A0R4J0T5;P28659	10;10	8;8	8;8	CUGBP Elav-like family member 1	Celf1	tr|A0A0R4J0T5|A0A0R4J0T5_MOUSE CUGBP, Elav-like family member 1 OS=Mus musculus OX=10090 GN=Celf1 PE=1 SV=1;sp|P28659|CELF1_MOUSE CUGBP Elav-like family member 1 OS=Mus musculus OX=10090 GN=Celf1 PE=1 SV=2	2	10	8	8	0	0	0	9	6	8	5	4	4	0	0	0	7	4	6	3	3	3	0	0	0	7	4	6	3	3	3	20.5	16.2	16.2	52.178	487	487;486	0	19.432	0	0	0
A0A0R4J0T8;Q9D8S3	A0A0R4J0T8;Q9D8S3	6;6	6;6	5;5	ADP-ribosylation factor GTPase-activating protein 3	Arfgap3	tr|A0A0R4J0T8|A0A0R4J0T8_MOUSE ADP-ribosylation factor GTPase activating protein 3 OS=Mus musculus OX=10090 GN=Arfgap3 PE=1 SV=1;sp|Q9D8S3|ARFG3_MOUSE ADP-ribosylation factor GTPase-activating protein 3 OS=Mus musculus OX=10090 GN=Arfgap3 PE=1 SV=2	2	6	6	5	1	0	1	2	0	1	5	4	5	1	0	1	2	0	1	5	4	5	1	0	1	2	0	1	5	3	4	12.8	12.8	10.9	57.542	524	524;523	0	8.0952	2.7	0	2.7
A2RSY6;A0A0R4J0U8;A0A087WQ23	A2RSY6;A0A0R4J0U8	27;27;6	27;27;6	27;27;6	TRMT1-like protein	Trmt1l	sp|A2RSY6|TRM1L_MOUSE TRMT1-like protein OS=Mus musculus OX=10090 GN=Trmt1l PE=1 SV=1;tr|A0A0R4J0U8|A0A0R4J0U8_MOUSE TRMT1-like protein OS=Mus musculus OX=10090 GN=Trmt1l PE=1 SV=1	3	27	27	27	0	0	0	6	3	5	21	20	21	0	0	0	6	3	5	21	20	21	0	0	0	6	3	5	21	20	21	43.7	43.7	43.7	80.86	728	728;728;158	0	192.21	0	0	0
A0A0R4J0V5;P08775	A0A0R4J0V5;P08775	2;2	2;2	2;2	DNA-directed RNA polymerase II subunit RPB1	Polr2a	tr|A0A0R4J0V5|A0A0R4J0V5_MOUSE DNA-directed RNA polymerase subunit OS=Mus musculus OX=10090 GN=Polr2a PE=1 SV=1;sp|P08775|RPB1_MOUSE DNA-directed RNA polymerase II subunit RPB1 OS=Mus musculus OX=10090 GN=Polr2a PE=1 SV=3	2	2	2	2	0	0	0	0	0	1	1	0	2	0	0	0	0	0	1	1	0	2	0	0	0	0	0	1	1	0	2	2.1	2.1	2.1	213.48	1932	1932;1970	0	11.711	0	0	0
A0A0R4J0W6;Q9CRC8;F6RGS7;F6RDA7;D6RHB1	A0A0R4J0W6;Q9CRC8	9;9;1;1;1	9;9;1;1;1	9;9;1;1;1	Leucine-rich repeat-containing protein 40	Lrrc40	tr|A0A0R4J0W6|A0A0R4J0W6_MOUSE Leucine rich repeat containing 40 OS=Mus musculus OX=10090 GN=Lrrc40 PE=1 SV=1;sp|Q9CRC8|LRC40_MOUSE Leucine-rich repeat-containing protein 40 OS=Mus musculus OX=10090 GN=Lrrc40 PE=1 SV=2	5	9	9	9	3	2	1	1	4	2	4	3	1	3	2	1	1	4	2	4	3	1	3	2	1	1	4	2	4	3	1	18.3	18.3	18.3	68.048	602	602;602;68;114;131	0	18.234	5.6	3.3	1.7
A0A0R4J0X7;S4R2G5;Q64467	A0A0R4J0X7;S4R2G5;Q64467	12;12;12	9;9;9	9;9;9	Glyceraldehyde-3-phosphate dehydrogenase;Glyceraldehyde-3-phosphate dehydrogenase, testis-specific	Gapdhs	tr|A0A0R4J0X7|A0A0R4J0X7_MOUSE Glyceraldehyde-3-phosphate dehydrogenase OS=Mus musculus OX=10090 GN=Gapdhs PE=1 SV=1;tr|S4R2G5|S4R2G5_MOUSE Glyceraldehyde-3-phosphate dehydrogenase OS=Mus musculus OX=10090 GN=Gapdhs PE=1 SV=1;sp|Q64467|G3PT_MOUSE Glycerald	3	12	9	9	7	5	6	10	8	9	9	8	9	5	3	4	8	5	6	7	6	6	5	3	4	8	5	6	7	6	6	37	32.2	32.2	47.442	438	438;440;440	0	107.62	21.9	13.9	16.4
A0A0R4J0X8;D3Z0V2;Q9ES28;A0A1B0GRS3;A2AFJ8;F6WMJ3;Q8K4I3	A0A0R4J0X8;D3Z0V2;Q9ES28	5;4;4;1;1;1;1	5;4;4;1;1;1;1	5;4;4;1;1;1;1	Rho guanine nucleotide exchange factor 7	Arhgef7	tr|A0A0R4J0X8|A0A0R4J0X8_MOUSE Rho guanine nucleotide exchange factor (GEF7) OS=Mus musculus OX=10090 GN=Arhgef7 PE=1 SV=1;tr|D3Z0V2|D3Z0V2_MOUSE Rho guanine nucleotide exchange factor (GEF7) (Fragment) OS=Mus musculus OX=10090 GN=Arhgef7 PE=1 SV=2;sp|Q9ES	7	5	5	5	0	0	0	0	0	0	4	4	1	0	0	0	0	0	0	4	4	1	0	0	0	0	0	0	4	4	1	10.2	10.2	10.2	73.029	646	646;636;862;200;483;795;771	0	10.618	0	0	0
A0A0R4J0Z1;P08003	A0A0R4J0Z1;P08003	3;3	3;3	3;3	Protein disulfide-isomerase A4	Pdia4	tr|A0A0R4J0Z1|A0A0R4J0Z1_MOUSE Protein disulfide-isomerase A4 OS=Mus musculus OX=10090 GN=Pdia4 PE=1 SV=1;sp|P08003|PDIA4_MOUSE Protein disulfide-isomerase A4 OS=Mus musculus OX=10090 GN=Pdia4 PE=1 SV=3	2	3	3	3	2	2	3	0	0	0	0	0	0	2	2	3	0	0	0	0	0	0	2	2	3	0	0	0	0	0	0	4.8	4.8	4.8	72.369	641	641;638	0	6.3378	3.1	3.1	4.8
D3Z1R6;A0A0R4J102;Q7TN99;F6T0J8;D3Z5R9;E9Q5X2;D3YUJ4	D3Z1R6;A0A0R4J102;Q7TN99;F6T0J8;D3Z5R9;E9Q5X2	7;7;7;6;6;5;1	7;7;7;6;6;5;1	2;2;2;1;1;0;0	Cytoplasmic polyadenylation element-binding protein 3	Cpeb3;Cpeb2	tr|D3Z1R6|D3Z1R6_MOUSE Cytoplasmic polyadenylation element binding protein 3 OS=Mus musculus OX=10090 GN=Cpeb3 PE=1 SV=1;tr|A0A0R4J102|A0A0R4J102_MOUSE Cytoplasmic polyadenylation element binding protein 3 OS=Mus musculus OX=10090 GN=Cpeb3 PE=1 SV=1;sp|Q7T	7	7	7	2	0	0	0	4	4	7	4	3	3	0	0	0	4	4	7	4	3	3	0	0	0	2	2	2	0	0	0	15	15	6.1	74.688	685	685;716;716;415;699;992;279	0	43.816	0	0	0
A0A0R4J112;Z4YKC4;A2AMI7	A0A0R4J112;Z4YKC4;A2AMI7	57;57;51	2;2;2	2;2;2		Eif4g3	tr|A0A0R4J112|A0A0R4J112_MOUSE Eukaryotic translation initiation factor 4 gamma, 3 OS=Mus musculus OX=10090 GN=Eif4g3 PE=1 SV=1;tr|Z4YKC4|Z4YKC4_MOUSE Eukaryotic translation initiation factor 4 gamma, 3 OS=Mus musculus OX=10090 GN=Eif4g3 PE=1 SV=1;tr|A2AMI	3	57	2	2	9	9	7	47	42	45	37	39	39	0	0	0	2	1	2	1	1	1	0	0	0	2	1	2	1	1	1	35.1	1.3	1.3	174.72	1578	1578;1567;1002	0	7.6532	6.4	6.7	5.1
A0A0R4J119;Q7TMB8;F6QD74;A0A0U1RQ05;Q5SQX6	A0A0R4J119;Q7TMB8;F6QD74;A0A0U1RQ05;Q5SQX6	5;5;3;3;3	5;5;3;3;3	5;5;3;3;3	Cytoplasmic FMR1-interacting protein 1;Cytoplasmic FMR1-interacting protein 2	Cyfip1;Cyfip2	tr|A0A0R4J119|A0A0R4J119_MOUSE Cytoplasmic FMR1-interacting protein OS=Mus musculus OX=10090 GN=Cyfip1 PE=1 SV=1;sp|Q7TMB8|CYFP1_MOUSE Cytoplasmic FMR1-interacting protein 1 OS=Mus musculus OX=10090 GN=Cyfip1 PE=1 SV=1;tr|F6QD74|F6QD74_MOUSE Cytoplasmic FM	5	5	5	5	0	0	0	1	0	1	3	4	3	0	0	0	1	0	1	3	4	3	0	0	0	1	0	1	3	4	3	4.2	4.2	4.2	144.92	1251	1251;1253;948;969;1253	0	8.1606	0	0	0
A0A0R4J124;O54781;Q6P5E1;A0A0G2JG74;A0A0G2JDY2;Q9Z0G2	A0A0R4J124;O54781	33;31;10;8;4;4	24;22;10;8;2;0	24;22;10;8;2;0	SRSF protein kinase 2;SRSF protein kinase 2 N-terminal;SRSF protein kinase 2 C-terminal	Srpk2	tr|A0A0R4J124|A0A0R4J124_MOUSE Serine/arginine-rich protein specific kinase 2 OS=Mus musculus OX=10090 GN=Srpk2 PE=1 SV=1;sp|O54781|SRPK2_MOUSE SRSF protein kinase 2 OS=Mus musculus OX=10090 GN=Srpk2 PE=1 SV=2	6	33	24	24	2	2	1	12	14	11	30	27	28	1	1	1	10	11	9	22	19	21	1	1	1	10	11	9	22	19	21	40	33.9	33.9	76.884	682	682;681;156;134;129;565	0	144.78	3.1	3.1	1.8
D3YUC9;A0A0R4J139	D3YUC9;A0A0R4J139	1;1	1;1	1;1		Msrb3	tr|D3YUC9|D3YUC9_MOUSE L-methionine (R)-S-oxide reductase OS=Mus musculus OX=10090 GN=Msrb3 PE=1 SV=1;tr|A0A0R4J139|A0A0R4J139_MOUSE Peptide-methionine (R)-S-oxide reductase OS=Mus musculus OX=10090 GN=Msrb3 PE=1 SV=1	2	1	1	1	1	1	1	1	1	1	0	0	0	1	1	1	1	1	1	0	0	0	1	1	1	1	1	1	0	0	0	9.6	9.6	9.6	12.058	114	114;186	0	4.2641	9.6	9.6	9.6
A0A5F8MPC5;A0A0R4J150;B9EJ86	A0A5F8MPC5;A0A0R4J150;B9EJ86	2;2;2	2;2;2	2;2;2	Oxysterol-binding protein	Osbpl8	tr|A0A5F8MPC5|A0A5F8MPC5_MOUSE Oxysterol-binding protein (Fragment) OS=Mus musculus OX=10090 GN=Osbpl8 PE=1 SV=1;tr|A0A0R4J150|A0A0R4J150_MOUSE Oxysterol-binding protein OS=Mus musculus OX=10090 GN=Osbpl8 PE=1 SV=1;sp|B9EJ86|OSBL8_MOUSE Oxysterol-binding p	3	2	2	2	1	1	0	2	1	1	0	2	1	1	1	0	2	1	1	0	2	1	1	1	0	2	1	1	0	2	1	4.3	4.3	4.3	79.231	695	695;847;889	0	4.809	1.6	1.6	0
A0A0R4J170;Q3TKT4;G3UX35;H3BKN5	A0A0R4J170;Q3TKT4;G3UX35	10;10;7;1	10;10;7;1	5;5;3;0	Transcription activator BRG1	Smarca4	tr|A0A0R4J170|A0A0R4J170_MOUSE SWI/SNF related, matrix associated, actin dependent regulator of chromatin, subfamily a, member 4 OS=Mus musculus OX=10090 GN=Smarca4 PE=1 SV=1;sp|Q3TKT4|SMCA4_MOUSE Transcription activator BRG1 OS=Mus musculus OX=10090 GN=Sm	4	10	10	5	0	0	0	0	1	1	7	5	9	0	0	0	0	1	1	7	5	9	0	0	0	0	0	0	3	2	5	6	6	2.8	181.85	1617	1617;1613;1267;299	0	33.558	0	0	0
A0A0R4J198;Q9JJN4;Q9ESL0	A0A0R4J198;Q9JJN4;Q9ESL0	33;33;30	33;33;30	33;33;30	Succinyl-CoA:3-ketoacid coenzyme A transferase 2A, mitochondrial;Succinyl-CoA:3-ketoacid coenzyme A transferase 2B, mitochondrial	Oxct2a;Oxct2b	tr|A0A0R4J198|A0A0R4J198_MOUSE Succinyl-CoA:3-ketoacid-coenzyme A transferase OS=Mus musculus OX=10090 GN=Oxct2b PE=3 SV=1;sp|Q9JJN4|SCO2A_MOUSE Succinyl-CoA:3-ketoacid coenzyme A transferase 2A, mitochondrial OS=Mus musculus OX=10090 GN=Oxct2a PE=2 SV=2;s	3	33	33	33	15	11	14	30	30	27	28	25	31	15	11	14	30	30	27	28	25	31	15	11	14	30	30	27	28	25	31	62.1	62.1	62.1	56.545	520	520;520;520	0	323.31	37.1	27.5	33.8
Q8VC66;A0A0R4J1A9;D3Z474	Q8VC66;A0A0R4J1A9	7;7;1	7;7;1	7;7;1	Afadin- and alpha-actinin-binding protein	Ssx2ip	sp|Q8VC66|ADIP_MOUSE Afadin- and alpha-actinin-binding protein OS=Mus musculus OX=10090 GN=Ssx2ip PE=1 SV=1;tr|A0A0R4J1A9|A0A0R4J1A9_MOUSE Synovial sarcoma, X 2 interacting protein OS=Mus musculus OX=10090 GN=Ssx2ip PE=1 SV=1	3	7	7	7	0	2	0	4	5	3	5	5	4	0	2	0	4	5	3	5	5	4	0	2	0	4	5	3	5	5	4	14	14	14	70.955	615	615;614;134	0	28.831	0	3.6	0
A0A0R4J1E2;E9PUM6;Q9CVV2	A0A0R4J1E2	25;3;1	25;3;1	0;0;0			tr|A0A0R4J1E2|A0A0R4J1E2_MOUSE Eukaryotic translation elongation factor 1 delta (guanine nucleotide exchange protein) OS=Mus musculus OX=10090 GN=Eef1d PE=1 SV=1	3	25	25	0	10	10	10	12	13	10	22	20	22	10	10	10	12	13	10	22	20	22	0	0	0	0	0	0	0	0	0	40.8	40.8	0	72.93	660	660;228;182	0	238.14	20.6	21.1	20
P40630;A0A0R4J1N9;D3Z0F3	P40630;A0A0R4J1N9	13;13;6	13;13;6	13;13;6	Transcription factor A, mitochondrial	Tfam	sp|P40630|TFAM_MOUSE Transcription factor A, mitochondrial OS=Mus musculus OX=10090 GN=Tfam PE=1 SV=2;tr|A0A0R4J1N9|A0A0R4J1N9_MOUSE Transcription factor A, mitochondrial OS=Mus musculus OX=10090 GN=Tfam PE=1 SV=1	3	13	13	13	0	1	0	6	7	4	6	6	7	0	1	0	6	7	4	6	6	7	0	1	0	6	7	4	6	6	7	37.9	37.9	37.9	27.987	243	243;199;143	0	44.195	0	9.1	0
A0A0R4J1P5;Q3V096	A0A0R4J1P5;Q3V096	2;2	2;2	2;2	Ankyrin repeat domain-containing protein 42	Ankrd42	tr|A0A0R4J1P5|A0A0R4J1P5_MOUSE Ankyrin repeat domain 42 OS=Mus musculus OX=10090 GN=Ankrd42 PE=1 SV=1;sp|Q3V096|ANR42_MOUSE Ankyrin repeat domain-containing protein 42 OS=Mus musculus OX=10090 GN=Ankrd42 PE=1 SV=1	2	2	2	2	0	0	0	0	0	0	2	0	1	0	0	0	0	0	0	2	0	1	0	0	0	0	0	0	2	0	1	4.7	4.7	4.7	57.345	516	516;527	0.00088574	2.3332	0	0	0
A0A0R4J1Q0;G5E896;Q3UJB9;D6RE33;F6V5I7;F6ZJ27	A0A0R4J1Q0;G5E896;Q3UJB9;D6RE33	7;7;6;5;1;1	7;7;6;5;1;1	7;7;6;5;1;1	Enhancer of mRNA-decapping protein 4	Edc4	tr|A0A0R4J1Q0|A0A0R4J1Q0_MOUSE Enhancer of mRNA-decapping protein 4 OS=Mus musculus OX=10090 GN=Edc4 PE=1 SV=1;tr|G5E896|G5E896_MOUSE Enhancer of mRNA-decapping protein 4 OS=Mus musculus OX=10090 GN=Edc4 PE=1 SV=1;sp|Q3UJB9|EDC4_MOUSE Enhancer of mRNA-deca	6	7	7	7	3	3	1	2	3	4	3	3	1	3	3	1	2	3	4	3	3	1	3	3	1	2	3	4	3	3	1	8.2	8.2	8.2	150.65	1390	1390;1406;1406;1318;265;427	0	35.975	3.4	3.4	1.2
D3Z4N6;E9QP07;A0A0R4J1S2;Q80W14;E9QMI6;F6XW22;D3Z1Y9;F6QF44	D3Z4N6;E9QP07;A0A0R4J1S2;Q80W14;E9QMI6	5;5;5;5;4;2;1;1	5;5;5;5;4;2;1;1	5;5;5;5;4;2;1;1	Pre-mRNA-processing factor 40 homolog B	Prpf40b	tr|D3Z4N6|D3Z4N6_MOUSE Pre-mRNA processing factor 40B OS=Mus musculus OX=10090 GN=Prpf40b PE=1 SV=1;tr|E9QP07|E9QP07_MOUSE Pre-mRNA processing factor 40B OS=Mus musculus OX=10090 GN=Prpf40b PE=1 SV=1;tr|A0A0R4J1S2|A0A0R4J1S2_MOUSE Pre-mRNA processing facto	8	5	5	5	0	0	0	0	1	1	2	3	1	0	0	0	0	1	1	2	3	1	0	0	0	0	1	1	2	3	1	7.1	7.1	7.1	97.846	857	857;870;873;870;852;257;136;189	0	6.5836	0	0	0
A0A0R4J1W0;B2RXQ9;D3Z080;A0A0R4J1T1;B7ZWM6;B9EKP8;Q3UTJ2;A0A0R4J1X5;Z4YJR7;F6V513;D3Z203;A0A1B0GRC3	A0A0R4J1W0;B2RXQ9;D3Z080;A0A0R4J1T1;B7ZWM6;B9EKP8;Q3UTJ2;A0A0R4J1X5;Z4YJR7	3;3;3;3;3;3;3;2;2;1;1;1	3;3;3;3;3;3;3;2;2;1;1;1	3;3;3;3;3;3;3;2;2;1;1;1	Sorbin and SH3 domain-containing protein 2	Sorbs2	tr|A0A0R4J1W0|A0A0R4J1W0_MOUSE Sorbin and SH3 domain containing 2 OS=Mus musculus OX=10090 GN=Sorbs2 PE=1 SV=1;tr|B2RXQ9|B2RXQ9_MOUSE Sorbin and SH3 domain containing 2 OS=Mus musculus OX=10090 GN=Sorbs2 PE=1 SV=1;tr|D3Z080|D3Z080_MOUSE Sorbin and SH3 doma	12	3	3	3	0	0	0	2	3	0	1	1	0	0	0	0	2	3	0	1	1	0	0	0	0	2	3	0	1	1	0	6.9	6.9	6.9	69.575	623	623;652;707;1134;1196;1214;1180;532;1079;199;212;274	0	4.9018	0	0	0
Q8BYC6;A0A0R4J1T3;F6RXB5	Q8BYC6;A0A0R4J1T3;F6RXB5	3;3;2	3;3;2	2;2;1	Serine/threonine-protein kinase TAO3	Taok3	sp|Q8BYC6|TAOK3_MOUSE Serine/threonine-protein kinase TAO3 OS=Mus musculus OX=10090 GN=Taok3 PE=1 SV=2;tr|A0A0R4J1T3|A0A0R4J1T3_MOUSE TAO kinase 3 (Fragment) OS=Mus musculus OX=10090 GN=Taok3 PE=1 SV=1;tr|F6RXB5|F6RXB5_MOUSE TAO kinase 3 (Fragment) OS=Mus	3	3	3	2	1	1	1	0	1	1	3	3	3	1	1	1	0	1	1	3	3	3	0	0	0	0	0	0	2	2	2	3.8	3.8	2.3	105.33	898	898;561;239	0	6.3935	1.4	1.4	1.4
Q9CZM3;A0A0R4J1Z3;Q9CR67	Q9CZM3;A0A0R4J1Z3;Q9CR67	1;1;1	1;1;1	1;1;1	Transmembrane protein 33	Tmem33	tr|Q9CZM3|Q9CZM3_MOUSE Transmembrane protein 33 OS=Mus musculus OX=10090 GN=Tmem33 PE=1 SV=1;tr|A0A0R4J1Z3|A0A0R4J1Z3_MOUSE Transmembrane protein 33 OS=Mus musculus OX=10090 GN=Tmem33 PE=1 SV=1;sp|Q9CR67|TMM33_MOUSE Transmembrane protein 33 OS=Mus musculus	3	1	1	1	1	1	1	1	1	1	1	1	1	1	1	1	1	1	1	1	1	1	1	1	1	1	1	1	1	1	1	9.5	9.5	9.5	14.049	126	126;246;247	0	3.6884	9.5	9.5	9.5
A0A0R4J205;Q8C1Z8;E0CZ56;E9Q663;E0CY61	A0A0R4J205;Q8C1Z8;E0CZ56	4;3;2;1;1	4;3;2;1;1	4;3;2;1;1	tRNA methyltransferase 10 homolog A	Trmt10a	tr|A0A0R4J205|A0A0R4J205_MOUSE tRNA methyltransferase 10 homolog A OS=Mus musculus OX=10090 GN=Trmt10a PE=1 SV=2;sp|Q8C1Z8|TM10A_MOUSE tRNA methyltransferase 10 homolog A OS=Mus musculus OX=10090 GN=Trmt10a PE=2 SV=2;tr|E0CZ56|E0CZ56_MOUSE tRNA methyltrans	5	4	4	4	0	0	0	0	0	0	3	4	4	0	0	0	0	0	0	3	4	4	0	0	0	0	0	0	3	4	4	18.6	18.6	18.6	37.98	328	328;328;163;64;98	0	13.268	0	0	0
A0A1W2P718;A0A0R4J211	A0A1W2P718;A0A0R4J211	1;1	1;1	1;1			tr|A0A1W2P718|A0A1W2P718_MOUSE Rho guanine nucleotide exchange factor (GEF) 25 OS=Mus musculus OX=10090 GN=Arhgef25 PE=1 SV=1;tr|A0A0R4J211|A0A0R4J211_MOUSE Rho guanine nucleotide exchange factor (GEF) 25 OS=Mus musculus OX=10090 GN=Arhgef25 PE=1 SV=1	2	1	1	1	0	0	0	1	1	1	0	0	0	0	0	0	1	1	1	0	0	0	0	0	0	1	1	1	0	0	0	13	13	13	10.783	100	100;609	0.0049221	1.7651	0	0	0
A0A0R4J217;D3YTV3;Q9DBV3	A0A0R4J217;D3YTV3;Q9DBV3	1;1;1	1;1;1	1;1;1	Probable ATP-dependent RNA helicase DHX34	Dhx34	tr|A0A0R4J217|A0A0R4J217_MOUSE DEAH (Asp-Glu-Ala-His) box polypeptide 34 OS=Mus musculus OX=10090 GN=Dhx34 PE=1 SV=1;tr|D3YTV3|D3YTV3_MOUSE DEAH (Asp-Glu-Ala-His) box polypeptide 34 OS=Mus musculus OX=10090 GN=Dhx34 PE=1 SV=1;sp|Q9DBV3|DHX34_MOUSE Probable	3	1	1	1	0	0	0	1	1	1	0	0	1	0	0	0	1	1	1	0	0	1	0	0	0	1	1	1	0	0	1	1	1	1	128.62	1145	1145;1145;1145	0	2.8058	0	0	0
Q9Z2E9;A0A0R4J225;E0CXJ2	Q9Z2E9;A0A0R4J225;E0CXJ2	2;2;1	2;2;1	2;2;1	Seipin	Bscl2	sp|Q9Z2E9|BSCL2_MOUSE Seipin OS=Mus musculus OX=10090 GN=Bscl2 PE=1 SV=2;tr|A0A0R4J225|A0A0R4J225_MOUSE Seipin OS=Mus musculus OX=10090 GN=Bscl2 PE=1 SV=1;tr|E0CXJ2|E0CXJ2_MOUSE Seipin OS=Mus musculus OX=10090 GN=Bscl2 PE=1 SV=1	3	2	2	2	1	1	1	2	2	1	0	1	1	1	1	1	2	2	1	0	1	1	1	1	1	2	2	1	0	1	1	4.4	4.4	4.4	43.104	383	383;443;213	0.00046232	2.6541	2.3	2.3	2.3
A0A0R4J233;A0A1W2P6J7;Q8C650	A0A0R4J233;A0A1W2P6J7;Q8C650	3;3;3	2;2;2	2;2;2	Septin-10	2024-09-10	tr|A0A0R4J233|A0A0R4J233_MOUSE Septin OS=Mus musculus OX=10090 GN=Septin10 PE=1 SV=1;tr|A0A1W2P6J7|A0A1W2P6J7_MOUSE Septin OS=Mus musculus OX=10090 GN=Septin10 PE=1 SV=1;sp|Q8C650|SEP10_MOUSE Septin-10 OS=Mus musculus OX=10090 GN=Septin10 PE=1 SV=1	3	3	2	2	1	1	1	2	1	2	2	2	3	0	0	0	1	0	1	1	1	2	0	0	0	1	0	1	1	1	2	9.1	9.1	9.1	49.829	427	427;452;452	0	9.5803	2.1	2.1	2.1
A0A0R4J242;Q922Q9;A0A0R4J058;A0A1B0GSH5;D3YWG2;G8JL55	A0A0R4J242;Q922Q9;A0A0R4J058;A0A1B0GSH5;D3YWG2;G8JL55	6;6;5;4;4;4	6;6;5;4;4;4	6;6;5;4;4;4	Chitinase domain-containing protein 1	Chid1	tr|A0A0R4J242|A0A0R4J242_MOUSE Chitinase domain containing 1 OS=Mus musculus OX=10090 GN=Chid1 PE=1 SV=1;sp|Q922Q9|CHID1_MOUSE Chitinase domain-containing protein 1 OS=Mus musculus OX=10090 GN=Chid1 PE=1 SV=1;tr|A0A0R4J058|A0A0R4J058_MOUSE Chitinase domain	6	6	6	6	0	0	0	2	3	2	4	5	6	0	0	0	2	3	2	4	5	6	0	0	0	2	3	2	4	5	6	22.5	22.5	22.5	45.204	396	396;393;310;192;263;297	0	43.045	0	0	0
A0A0R4J259;G3UZI2;G3UZ48;G3UXJ6;G3UWM1;G3XA76;G3UXU5;G3UY67;G3UYK7	A0A0R4J259;G3UZI2;G3UZ48;G3UXJ6	51;47;44;35;19;6;5;1;1	1;1;1;1;0;0;0;1;1	1;1;1;1;0;0;0;1;1		Syncrip	tr|A0A0R4J259|A0A0R4J259_MOUSE Synaptotagmin binding, cytoplasmic RNA interacting protein OS=Mus musculus OX=10090 GN=Syncrip PE=1 SV=1;tr|G3UZI2|G3UZI2_MOUSE Synaptotagmin binding, cytoplasmic RNA interacting protein OS=Mus musculus OX=10090 GN=Syncrip PE	9	51	1	1	2	1	1	46	42	43	45	46	44	0	0	0	1	1	1	0	1	1	0	0	0	1	1	1	0	1	1	60.6	1.8	1.8	62.543	561	561;527;464;448;196;94;67;59;97	0	2.9589	3.7	2.3	2.3
A0A0R4J260;B2RRE7	A0A0R4J260;B2RRE7	11;11	11;11	11;11	OTU domain-containing protein 4	Otud4	tr|A0A0R4J260|A0A0R4J260_MOUSE ubiquitinyl hydrolase 1 OS=Mus musculus OX=10090 GN=Otud4 PE=1 SV=1;sp|B2RRE7|OTUD4_MOUSE OTU domain-containing protein 4 OS=Mus musculus OX=10090 GN=Otud4 PE=1 SV=1	2	11	11	11	1	0	1	3	4	3	10	9	7	1	0	1	3	4	3	10	9	7	1	0	1	3	4	3	10	9	7	10.5	10.5	10.5	122.93	1106	1106;1107	0	35.024	1.1	0	1.1
O35083;A0A0R4J263;G3UWV6	O35083;A0A0R4J263;G3UWV6	2;2;1	2;2;1	2;2;1	1-acyl-sn-glycerol-3-phosphate acyltransferase alpha;1-acyl-sn-glycerol-3-phosphate acyltransferase	Agpat1	sp|O35083|PLCA_MOUSE 1-acyl-sn-glycerol-3-phosphate acyltransferase alpha OS=Mus musculus OX=10090 GN=Agpat1 PE=1 SV=1;tr|A0A0R4J263|A0A0R4J263_MOUSE 1-acyl-sn-glycerol-3-phosphate acyltransferase OS=Mus musculus OX=10090 GN=Agpat1 PE=1 SV=1;tr|G3UWV6|G3UW	3	2	2	2	0	1	1	0	1	1	1	0	0	0	1	1	0	1	1	1	0	0	0	1	1	0	1	1	1	0	0	11.2	11.2	11.2	31.709	285	285;285;198	0	4.5573	0	3.2	3.2
Q7TMF3;A0A0R4J275;F6RBR6	Q7TMF3;A0A0R4J275;F6RBR6	3;3;2	3;3;2	3;3;2	NADH dehydrogenase [ubiquinone] 1 alpha subcomplex subunit 12	Ndufa12	sp|Q7TMF3|NDUAC_MOUSE NADH dehydrogenase [ubiquinone] 1 alpha subcomplex subunit 12 OS=Mus musculus OX=10090 GN=Ndufa12 PE=1 SV=2;tr|A0A0R4J275|A0A0R4J275_MOUSE NADH dehydrogenase [ubiquinone] 1 alpha subcomplex subunit 12 OS=Mus musculus OX=10090 GN=Ndufa	3	3	3	3	3	1	1	2	1	1	3	2	1	3	1	1	2	1	1	3	2	1	3	1	1	2	1	1	3	2	1	26.2	26.2	26.2	17.086	145	145;149;85	0	28.068	26.2	11.7	11.7
A0A0R4J288;O70348;G3UX82;G3UZ39;G3UZP8;G3UWP7	A0A0R4J288;O70348;G3UX82;G3UZ39;G3UZP8	6;6;5;5;3;2	6;6;5;5;3;2	6;6;5;5;3;2	Decapping and exoribonuclease protein	Dxo	tr|A0A0R4J288|A0A0R4J288_MOUSE Decapping nuclease OS=Mus musculus OX=10090 GN=Dxo PE=1 SV=1;sp|O70348|DXO_MOUSE Decapping and exoribonuclease protein OS=Mus musculus OX=10090 GN=Dxo PE=1 SV=2;tr|G3UX82|G3UX82_MOUSE Decapping nuclease OS=Mus musculus OX=100	6	6	6	6	0	0	0	1	1	2	2	2	3	0	0	0	1	1	2	2	2	3	0	0	0	1	1	2	2	2	3	23.4	23.4	23.4	45.329	397	397;397;245;304;144;118	0	11.53	0	0	0
E9PUG7;A0A0R4J298;Q61211;M0QWK9;Q8C8I3	E9PUG7;A0A0R4J298;Q61211;M0QWK9;Q8C8I3	3;3;3;2;2	3;3;3;2;2	3;3;3;2;2	Eukaryotic translation initiation factor 2D	Eif2d	tr|E9PUG7|E9PUG7_MOUSE Eukaryotic translation initiation factor 2D OS=Mus musculus OX=10090 GN=Eif2d PE=1 SV=1;tr|A0A0R4J298|A0A0R4J298_MOUSE Eukaryotic translation initiation factor 2D OS=Mus musculus OX=10090 GN=Eif2d PE=1 SV=1;sp|Q61211|EIF2D_MOUSE Euka	5	3	3	3	0	0	0	0	0	0	2	1	1	0	0	0	0	0	0	2	1	1	0	0	0	0	0	0	2	1	1	12.9	12.9	12.9	60.877	552	552;587;570;176;453	0	12.023	0	0	0
A0A0R4J2A3;Q9D4D4	A0A0R4J2A3;Q9D4D4	1;1	1;1	1;1	Transketolase-like protein 2	Tktl2	tr|A0A0R4J2A3|A0A0R4J2A3_MOUSE Transketolase-like 2 OS=Mus musculus OX=10090 GN=Tktl2 PE=1 SV=1;sp|Q9D4D4|TKTL2_MOUSE Transketolase-like protein 2 OS=Mus musculus OX=10090 GN=Tktl2 PE=1 SV=1	2	1	1	1	0	0	0	0	0	0	1	0	0	0	0	0	0	0	0	1	0	0	0	0	0	0	0	0	1	0	0	3.2	3.2	3.2	68.481	627	627;627	0.0041563	1.8326	0	0	0
A0A0R4J2B2;Q6WVG3;Q8C7J6;Q5DTY9;Q50H33	A0A0R4J2B2;Q6WVG3	17;15;2;1;1	17;15;2;1;1	17;15;2;1;1	BTB/POZ domain-containing protein KCTD12	Kctd12	tr|A0A0R4J2B2|A0A0R4J2B2_MOUSE Potassium channel tetramerisation domain containing 12 OS=Mus musculus OX=10090 GN=Kctd12 PE=1 SV=1;sp|Q6WVG3|KCD12_MOUSE BTB/POZ domain-containing protein KCTD12 OS=Mus musculus OX=10090 GN=Kctd12 PE=1 SV=1	5	17	17	17	1	0	1	11	12	10	13	12	14	1	0	1	11	12	10	13	12	14	1	0	1	11	12	10	13	12	14	57.8	57.8	57.8	35.888	327	327;327;292;427;476	0	225.22	3.7	0	3.7
A0A0R4J2D3;Q8BI84	A0A0R4J2D3;Q8BI84	7;6	7;6	7;6	Melanoma inhibitory activity protein 3	Mia3	tr|A0A0R4J2D3|A0A0R4J2D3_MOUSE MIA SH3 domain ER export factor 3 OS=Mus musculus OX=10090 GN=Mia3 PE=1 SV=3;sp|Q8BI84|TGO1_MOUSE Transport and Golgi organization protein 1 homolog OS=Mus musculus OX=10090 GN=Mia3 PE=1 SV=2	2	7	7	7	0	0	0	0	0	0	4	6	4	0	0	0	0	0	0	4	6	4	0	0	0	0	0	0	4	6	4	4	4	4	213.74	1930	1930;1930	0	15.061	0	0	0
A0A0U1RNK7;E9PX48;A2A9M5;A2A9M4;Q8R1A4;A0A0U1RNY4;A2AW79;F6ZJ55;A0A0U1RPH6;A0A0U1RP53	A0A0U1RNK7;E9PX48;A2A9M5;A2A9M4;Q8R1A4	18;18;18;18;18;5;2;2;1;1	18;18;18;18;18;5;2;2;1;1	15;15;15;15;15;5;2;2;1;1	Dedicator of cytokinesis protein 7	Dock7	tr|A0A0U1RNK7|A0A0U1RNK7_MOUSE Dedicator of cytokinesis 7 OS=Mus musculus OX=10090 GN=Dock7 PE=1 SV=1;tr|E9PX48|E9PX48_MOUSE Dedicator of cytokinesis 7 OS=Mus musculus OX=10090 GN=Dock7 PE=1 SV=2;tr|A2A9M5|A2A9M5_MOUSE Dedicator of cytokinesis 7 OS=Mus mus	10	18	18	15	1	0	1	6	7	9	15	10	12	1	0	1	6	7	9	15	10	12	1	0	1	5	6	8	12	8	9	10.8	10.8	9.2	238.09	2098	2098;2100;2128;2130;2130;811;247;255;46;102	0	45.129	0.7	0	0.7
D3Z7R0;A0A0U1RQ97;A0A0U1RNL7;A0A0U1RPT4;O55028	D3Z7R0;A0A0U1RQ97;A0A0U1RNL7;A0A0U1RPT4;O55028	1;1;1;1;1	1;1;1;1;1	1;1;1;1;1	[3-methyl-2-oxobutanoate dehydrogenase [lipoamide]] kinase, mitochondrial	Bckdk	tr|D3Z7R0|D3Z7R0_MOUSE Protein-serine/threonine kinase (Fragment) OS=Mus musculus OX=10090 GN=Bckdk PE=1 SV=1;tr|A0A0U1RQ97|A0A0U1RQ97_MOUSE Protein-serine/threonine kinase (Fragment) OS=Mus musculus OX=10090 GN=Bckdk PE=1 SV=2;tr|A0A0U1RNL7|A0A0U1RNL7_MOU	5	1	1	1	0	0	0	0	1	0	1	0	1	0	0	0	0	1	0	1	0	1	0	0	0	0	1	0	1	0	1	4.2	4.2	4.2	24.351	214	214;216;335;365;412	0.0049505	1.7953	0	0	0
A0A0U1RNM2;A1L3S7;Q8VHR5	A0A0U1RNM2;A1L3S7;Q8VHR5	2;2;2	2;2;2	2;2;2	Transcriptional repressor p66-beta	Gatad2b	tr|A0A0U1RNM2|A0A0U1RNM2_MOUSE GATA zinc finger domain containing 2B (Fragment) OS=Mus musculus OX=10090 GN=Gatad2b PE=1 SV=1;tr|A1L3S7|A1L3S7_MOUSE GATA zinc finger domain containing 2B OS=Mus musculus OX=10090 GN=Gatad2b PE=1 SV=1;sp|Q8VHR5|P66B_MOUSE Tr	3	2	2	2	0	0	0	0	0	0	2	1	1	0	0	0	0	0	0	2	1	1	0	0	0	0	0	0	2	1	1	9.1	9.1	9.1	28.659	263	263;578;594	0	6.841	0	0	0
A0A0U1RNU4;Q8R0T2	A0A0U1RNU4;Q8R0T2	3;3	3;3	3;3	Zinc finger protein 768	Znf768	tr|A0A0U1RNU4|A0A0U1RNU4_MOUSE Zinc finger protein 768 OS=Mus musculus OX=10090 GN=Zfp768 PE=1 SV=1;sp|Q8R0T2|ZN768_MOUSE Zinc finger protein 768 OS=Mus musculus OX=10090 GN=Znf768 PE=1 SV=1	2	3	3	3	0	0	0	0	0	0	2	2	1	0	0	0	0	0	0	2	2	1	0	0	0	0	0	0	2	2	1	6.4	6.4	6.4	62.427	565	565;568	0	4.4954	0	0	0
A0A0U1RPD7;A0A0U1RNW0;A0A0U1RPM8;Q6P2B2;A0A0U1RP94;Q8BTH8;Q99K78;A0A494BAP2;Q8BVP5;Q8C4X2;A0A140LIJ6;A0A140LHR2;A0A0U1RNX9;A0A0U1RPL1;A0A0U1RQ81	A0A0U1RPD7;A0A0U1RNW0;A0A0U1RPM8;Q6P2B2;A0A0U1RP94;Q8BTH8;Q99K78;A0A494BAP2;Q8BVP5;Q8C4X2	3;3;3;3;3;3;2;2;2;2;1;1;1;1;1	3;3;3;3;3;3;2;2;2;2;1;1;1;1;1	3;3;3;3;3;3;2;2;2;2;1;1;1;1;1	Casein kinase I isoform gamma-1;Casein kinase I isoform gamma-2;Casein kinase I isoform gamma-3	Csnk1g1;Csnk1g2;Csnk1g3	tr|A0A0U1RPD7|A0A0U1RPD7_MOUSE non-specific serine/threonine protein kinase OS=Mus musculus OX=10090 GN=Csnk1g1 PE=1 SV=1;tr|A0A0U1RNW0|A0A0U1RNW0_MOUSE non-specific serine/threonine protein kinase OS=Mus musculus OX=10090 GN=Csnk1g1 PE=1 SV=1;tr|A0A0U1RPM	15	3	3	3	1	0	0	0	0	1	3	2	2	1	0	0	0	0	1	3	2	2	1	0	0	0	0	1	3	2	2	7.2	7.2	7.2	45.076	390	390;422;424;430;461;459;442;448;415;424;77;114;141;164;204	0	4.3358	2.3	0	0
A0A0U1RPL0;Q7TQH0;E9Q5Q0;J3QP59	A0A0U1RPL0;Q7TQH0;E9Q5Q0	29;29;26;9	2;2;0;0	2;2;0;0	Ataxin-2-like protein	Atxn2l	tr|A0A0U1RPL0|A0A0U1RPL0_MOUSE Ataxin 2-like OS=Mus musculus OX=10090 GN=Atxn2l PE=1 SV=1;sp|Q7TQH0|ATX2L_MOUSE Ataxin-2-like protein OS=Mus musculus OX=10090 GN=Atxn2l PE=1 SV=1;tr|E9Q5Q0|E9Q5Q0_MOUSE Ataxin 2-like (Fragment) OS=Mus musculus OX=10090 GN=A	4	29	2	2	4	4	2	12	12	13	21	18	22	0	0	0	2	1	1	2	2	2	0	0	0	2	1	1	2	2	2	27.4	2.6	2.6	115.26	1096	1096;1049;863;218	0	54.893	4.9	4.8	2.5
A0A140LHA2;Q9WVA3;A0A140LIM5;A0A140LJ21;A0A140LI47	A0A140LHA2;Q9WVA3	17;17;7;7;5	17;17;7;7;5	17;17;7;7;5	Mitotic checkpoint protein BUB3	Bub3	tr|A0A140LHA2|A0A140LHA2_MOUSE BUB3 mitotic checkpoint protein OS=Mus musculus OX=10090 GN=Bub3 PE=1 SV=1;sp|Q9WVA3|BUB3_MOUSE Mitotic checkpoint protein BUB3 OS=Mus musculus OX=10090 GN=Bub3 PE=1 SV=2	5	17	17	17	2	1	2	13	11	14	11	14	15	2	1	2	13	11	14	11	14	15	2	1	2	13	11	14	11	14	15	55.2	55.2	55.2	36.766	324	324;326;184;220;100	0	280.34	8.3	4.3	8.3
A0A140LHB7	A0A140LHB7	1	1	1			tr|A0A140LHB7|A0A140LHB7_MOUSE Elongation factor like GTPase 1 OS=Mus musculus OX=10090 GN=Efl1 PE=1 SV=1	1	1	1	1	1	1	1	0	0	1	1	1	1	1	1	1	0	0	1	1	1	1	1	1	1	0	0	1	1	1	1	11.7	11.7	11.7	11.436	103	103	0.004886	1.7314	11.7	11.7	11.7
A0A140LJG6;A0A140LHR3;A0A140LJ01;A0A140LHG8;Q9CYN2;A0A140LIK0	A0A140LJG6;A0A140LHR3;A0A140LJ01;A0A140LHG8;Q9CYN2;A0A140LIK0	2;2;2;2;2;1	2;2;2;2;2;1	2;2;2;2;2;1	Signal peptidase complex subunit 2	Spcs2	tr|A0A140LJG6|A0A140LJG6_MOUSE Signal peptidase complex subunit 2 OS=Mus musculus OX=10090 GN=Spcs2 PE=1 SV=1;tr|A0A140LHR3|A0A140LHR3_MOUSE Signal peptidase complex subunit 2 OS=Mus musculus OX=10090 GN=Spcs2 PE=1 SV=1;tr|A0A140LJ01|A0A140LJ01_MOUSE Signa	6	2	2	2	0	1	1	0	0	0	1	0	1	0	1	1	0	0	0	1	0	1	0	1	1	0	0	0	1	0	1	13.8	13.8	13.8	14.255	123	123;190;252;260;226;177	0.0033599	1.9055	0	7.3	7.3
A0A140LIW6;A0A140LHY7;Q8BH76;Q9EQ28	A0A140LIW6;A0A140LHY7;Q8BH76;Q9EQ28	1;1;1;1	1;1;1;1	1;1;1;1	DNA polymerase delta subunit 3	Pold3	tr|A0A140LIW6|A0A140LIW6_MOUSE Polymerase (DNA-directed), delta 3, accessory subunit (Fragment) OS=Mus musculus OX=10090 GN=Pold3 PE=1 SV=1;tr|A0A140LHY7|A0A140LHY7_MOUSE DNA polymerase delta subunit 3 OS=Mus musculus OX=10090 GN=Pold3 PE=1 SV=1;tr|Q8BH76|	4	1	1	1	0	0	0	0	0	0	1	1	0	0	0	0	0	0	0	1	1	0	0	0	0	0	0	0	1	1	0	4.5	4.5	4.5	28.998	269	269;422;461;462	0.00089767	2.429	0	0	0
A0A140LI02;G5E8M4;Q80WJ1;A0A140LI42	A0A140LI02;G5E8M4;Q80WJ1	12;12;12;4	12;12;12;4	12;12;12;4	Gametogenetin	Ggn	tr|A0A140LI02|A0A140LI02_MOUSE Gametogenetin OS=Mus musculus OX=10090 GN=Ggn PE=1 SV=1;tr|G5E8M4|G5E8M4_MOUSE Gametogenetin OS=Mus musculus OX=10090 GN=Ggn PE=1 SV=1;sp|Q80WJ1|GGN_MOUSE Gametogenetin OS=Mus musculus OX=10090 GN=Ggn PE=1 SV=2	4	12	12	12	0	1	0	2	2	1	10	10	8	0	1	0	2	2	1	10	10	8	0	1	0	2	2	1	10	10	8	28.3	28.3	28.3	70.446	686	686;709;673;305	0	57.426	0	1.2	0
A0A140LI36;J3QMP3;G3UZ78	A0A140LI36;J3QMP3;G3UZ78	3;3;3	3;3;3	3;3;3	Androglobin	Adgb	tr|A0A140LI36|A0A140LI36_MOUSE Androglobin OS=Mus musculus OX=10090 GN=Adgb PE=1 SV=1;tr|J3QMP3|J3QMP3_MOUSE Androglobin OS=Mus musculus OX=10090 GN=Adgb PE=1 SV=1;sp|G3UZ78|ADGB_MOUSE Androglobin OS=Mus musculus OX=10090 GN=Adgb PE=1 SV=1	3	3	3	3	0	0	0	0	0	0	3	1	1	0	0	0	0	0	0	3	1	1	0	0	0	0	0	0	3	1	1	2.6	2.6	2.6	185.69	1633	1633;1660;1657	0	7.8466	0	0	0
A0A140LIA8	A0A140LIA8	9	1	1			tr|A0A140LIA8|A0A140LIA8_MOUSE Testis-specific serine kinase substrate (Fragment) OS=Mus musculus OX=10090 GN=Tsks PE=1 SV=1	1	9	1	1	0	0	0	1	2	2	7	7	7	0	0	0	0	0	0	0	0	1	0	0	0	0	0	0	0	0	1	57.8	14.6	14.6	19.29	185	185	0.0087267	1.5295	0	0	0
A0A140LIJ4;A0A571BGC3	A0A140LIJ4;A0A571BGC3	2;2	2;2	2;2			tr|A0A140LIJ4|A0A140LIJ4_MOUSE Dynein, axonemal, heavy chain 14 OS=Mus musculus OX=10090 GN=Dnah14 PE=1 SV=1;tr|A0A571BGC3|A0A571BGC3_MOUSE Dynein, axonemal, heavy chain 14 OS=Mus musculus OX=10090 GN=Dnah14 PE=1 SV=2	2	2	2	2	0	0	0	1	1	1	0	2	1	0	0	0	1	1	1	0	2	1	0	0	0	1	1	1	0	2	1	0.6	0.6	0.6	516.94	4489	4489;4596	0.0013193	2.2811	0	0	0
A0A140LIT2;O88455	A0A140LIT2;O88455	1;1	1;1	1;1	7-dehydrocholesterol reductase	Dhcr7	tr|A0A140LIT2|A0A140LIT2_MOUSE 7-dehydrocholesterol reductase OS=Mus musculus OX=10090 GN=Dhcr7 PE=1 SV=1;sp|O88455|DHCR7_MOUSE 7-dehydrocholesterol reductase OS=Mus musculus OX=10090 GN=Dhcr7 PE=1 SV=1	2	1	1	1	0	0	0	0	0	0	1	1	1	0	0	0	0	0	0	1	1	1	0	0	0	0	0	0	1	1	1	1.7	1.7	1.7	54.219	474	474;471	0.0021739	2.2159	0	0	0
A0A140T8I9;E9Q3L2;A0A338P7D3;A0A338P6S0	A0A140T8I9;E9Q3L2	8;8;2;1	8;8;2;1	8;8;2;1		Pi4ka	tr|A0A140T8I9|A0A140T8I9_MOUSE 1-phosphatidylinositol 4-kinase OS=Mus musculus OX=10090 GN=Pi4ka PE=1 SV=1;sp|E9Q3L2|PI4KA_MOUSE Phosphatidylinositol 4-kinase alpha OS=Mus musculus OX=10090 GN=Pi4ka PE=1 SV=2	4	8	8	8	0	0	0	3	4	5	6	5	5	0	0	0	3	4	5	6	5	5	0	0	0	3	4	5	6	5	5	4.6	4.6	4.6	231.35	2044	2044;2105;319;153	0	20.62	0	0	0
A0A1B0GRB5;A0A1B0GRA7;B2RQL0;A0A140T8J8;A0A1B0GSX7;Q6PFD9;A0A1B0GS62	A0A1B0GRB5;A0A1B0GRA7;B2RQL0;A0A140T8J8;A0A1B0GSX7;Q6PFD9	11;11;11;11;11;11;1	11;11;11;11;11;11;1	11;11;11;11;11;11;1	Nuclear pore complex protein Nup98-Nup96;Nuclear pore complex protein Nup98;Nuclear pore complex protein Nup96	Nup98	tr|A0A1B0GRB5|A0A1B0GRB5_MOUSE Nucleoporin 98 OS=Mus musculus OX=10090 GN=Nup98 PE=1 SV=1;tr|A0A1B0GRA7|A0A1B0GRA7_MOUSE Nucleoporin 98 OS=Mus musculus OX=10090 GN=Nup98 PE=1 SV=1;tr|B2RQL0|B2RQL0_MOUSE Nucleoporin 98 OS=Mus musculus OX=10090 GN=Nup98 PE=1	7	11	11	11	2	4	3	6	4	6	4	4	3	2	4	3	6	4	6	4	4	3	2	4	3	6	4	6	4	4	3	22.1	22.1	22.1	101.25	967	967;984;1170;1187;1816;1816;230	0	56.175	3.9	6.7	6.3
A0A171EBK9;Q80Y75	A0A171EBK9;Q80Y75	2;2	2;2	2;2	DnaJ homolog subfamily B member 13	Dnajb13	tr|A0A171EBK9|A0A171EBK9_MOUSE DnaJ heat shock protein family (Hsp40) member B13 (Fragment) OS=Mus musculus OX=10090 GN=Dnajb13 PE=1 SV=1;sp|Q80Y75|DJB13_MOUSE DnaJ homolog subfamily B member 13 OS=Mus musculus OX=10090 GN=Dnajb13 PE=1 SV=1	2	2	2	2	0	0	0	1	0	1	0	0	0	0	0	0	1	0	1	0	0	0	0	0	0	1	0	1	0	0	0	12.9	12.9	12.9	29.332	256	256;316	0	5.7982	0	0	0
A0A171KXD3;Q9JIF0;A0A140LJ70;A0A140LJF4;A0A140LHF7;A0A140LHS4;A0A140LI33;A0A140LIF7;A0A140LJ68;Q6PAK3	A0A171KXD3;Q9JIF0;A0A140LJ70;A0A140LJF4;A0A140LHF7;A0A140LHS4	10;10;7;6;6;5;4;2;2;1	10;10;7;6;6;5;4;2;2;1	10;10;7;6;6;5;4;2;2;1	Protein arginine N-methyltransferase 1	Prmt1	tr|A0A171KXD3|A0A171KXD3_MOUSE Protein arginine N-methyltransferase 1 OS=Mus musculus OX=10090 GN=Prmt1 PE=1 SV=1;sp|Q9JIF0|ANM1_MOUSE Protein arginine N-methyltransferase 1 OS=Mus musculus OX=10090 GN=Prmt1 PE=1 SV=1;tr|A0A140LJ70|A0A140LJ70_MOUSE Protein	10	10	10	10	0	0	0	6	7	6	5	3	6	0	0	0	6	7	6	5	3	6	0	0	0	6	7	6	5	3	6	42.5	42.5	42.5	36.567	318	318;371;254;193;208;217;164;113;122;394	0	24.388	0	0	0
A0A1B0GQU8;P35980;A0A1B0GSS8;A0A1B0GSF7;A0A1B0GSA8;A0A1B0GRZ3;A0A1B0GS28	A0A1B0GQU8;P35980;A0A1B0GSS8;A0A1B0GSF7;A0A1B0GSA8	7;7;6;5;4;2;2	7;7;6;5;4;2;2	7;7;6;5;4;2;2	60S ribosomal protein L18	Rpl18	tr|A0A1B0GQU8|A0A1B0GQU8_MOUSE Ribosomal protein L18 OS=Mus musculus OX=10090 GN=Rpl18 PE=1 SV=1;sp|P35980|RL18_MOUSE Large ribosomal subunit protein eL18 OS=Mus musculus OX=10090 GN=Rpl18 PE=1 SV=3;tr|A0A1B0GSS8|A0A1B0GSS8_MOUSE Ribosomal protein L18 OS=M	7	7	7	7	4	3	3	3	3	1	5	6	5	4	3	3	3	3	1	5	6	5	4	3	3	3	3	1	5	6	5	44.7	44.7	44.7	18.101	159	159;188;155;136;126;57;80	0	24.382	29.6	22	22
A0A1B0GR08;Q921G8;A0A1B0GRD4;A0A1B0GRD0;A0A1B0GS25	A0A1B0GR08;Q921G8	6;6;2;2;1	6;6;2;2;1	6;6;2;2;1	Gamma-tubulin complex component 2	Tubgcp2	tr|A0A1B0GR08|A0A1B0GR08_MOUSE Gamma-tubulin complex component (Fragment) OS=Mus musculus OX=10090 GN=Tubgcp2 PE=1 SV=1;sp|Q921G8|GCP2_MOUSE Gamma-tubulin complex component 2 OS=Mus musculus OX=10090 GN=Tubgcp2 PE=1 SV=2	5	6	6	6	0	2	2	4	3	2	5	3	3	0	2	2	4	3	2	5	3	3	0	2	2	4	3	2	5	3	3	9.8	9.8	9.8	102.74	900	900;905;149;205;83	0	17.261	0	2.7	4
A0A1B0GR78;A0A1B0GRA5;P70302	A0A1B0GR78;A0A1B0GRA5;P70302	3;3;3	3;3;3	3;3;3	Stromal interaction molecule 1	Stim1	tr|A0A1B0GR78|A0A1B0GR78_MOUSE Stromal interaction molecule 1 OS=Mus musculus OX=10090 GN=Stim1 PE=1 SV=1;tr|A0A1B0GRA5|A0A1B0GRA5_MOUSE Stromal interaction molecule 1 OS=Mus musculus OX=10090 GN=Stim1 PE=1 SV=1;sp|P70302|STIM1_MOUSE Stromal interaction mo	3	3	3	3	0	0	0	1	2	2	3	3	2	0	0	0	1	2	2	3	3	2	0	0	0	1	2	2	3	3	2	6.9	6.9	6.9	62.195	540	540;793;685	0	9.8771	0	0	0
A0A1B0GR91;A0A1B0GSZ4;A0A1B0GSS7	A0A1B0GR91;A0A1B0GSZ4;A0A1B0GSS7	2;1;1	2;1;1	2;1;1			tr|A0A1B0GR91|A0A1B0GR91_MOUSE Predicted gene 4779 OS=Mus musculus OX=10090 GN=Gm4779 PE=1 SV=1;tr|A0A1B0GSZ4|A0A1B0GSZ4_MOUSE Predicted gene 4779 (Fragment) OS=Mus musculus OX=10090 GN=Gm4779 PE=1 SV=1;tr|A0A1B0GSS7|A0A1B0GSS7_MOUSE Predicted gene 4779 OS	3	2	2	2	0	0	0	1	1	0	0	1	1	0	0	0	1	1	0	0	1	1	0	0	0	1	1	0	0	1	1	4.8	4.8	4.8	59.993	561	561;209;224	0	3.8028	0	0	0
A0A1B0GRK5;D3Z7V1;A0A1B0GSJ7;Q9DAM9	A0A1B0GRK5;D3Z7V1;A0A1B0GSJ7;Q9DAM9	1;1;1;1	1;1;1;1	1;1;1;1	Fibronectin type 3 and ankyrin repeat domains 1 protein	Fank1	tr|A0A1B0GRK5|A0A1B0GRK5_MOUSE Fibronectin type 3 and ankyrin repeat domains 1 (Fragment) OS=Mus musculus OX=10090 GN=Fank1 PE=1 SV=1;tr|D3Z7V1|D3Z7V1_MOUSE Fibronectin type 3 and ankyrin repeat domains 1 (Fragment) OS=Mus musculus OX=10090 GN=Fank1 PE=1 S	4	1	1	1	0	0	1	0	0	0	0	0	0	0	0	1	0	0	0	0	0	0	0	0	1	0	0	0	0	0	0	12.5	12.5	12.5	10.785	96	96;152;343;344	0.0072029	1.6026	0	0	12.5
A0A1B0GRN6;D3Z0R4;P46686	A0A1B0GRN6;D3Z0R4;P46686	5;5;5	5;5;5	5;5;5	Tubby-like protein;Tubby-related protein 2	Tulp2	tr|A0A1B0GRN6|A0A1B0GRN6_MOUSE Tubby-like protein 2 OS=Mus musculus OX=10090 GN=Tulp2 PE=1 SV=1;tr|D3Z0R4|D3Z0R4_MOUSE Tubby-like protein OS=Mus musculus OX=10090 GN=Tulp2 PE=1 SV=3;sp|P46686|TULP2_MOUSE Tubby-related protein 2 OS=Mus musculus OX=10090 GN=	3	5	5	5	1	1	1	3	2	3	3	4	4	1	1	1	3	2	3	3	4	4	1	1	1	3	2	3	3	4	4	16.6	16.6	16.6	50.509	457	457;457;562	0	32.538	2.6	2.6	2.6
A0A1B0GRR5;Q80ZV3;Q6P8V7;A0A1B0GRP7;Q9Z2Y8;A0A1B0GQY5;A0A1B0GSA1;A0A1B0GSP5	A0A1B0GRR5;Q80ZV3;Q6P8V7;A0A1B0GRP7;Q9Z2Y8;A0A1B0GQY5	3;3;3;3;3;2;1;1	3;3;3;3;3;2;1;1	3;3;3;3;3;2;1;1	Proline synthase co-transcribed bacterial homolog protein	Prosc	tr|A0A1B0GRR5|A0A1B0GRR5_MOUSE Pyridoxal phosphate binding protein (Fragment) OS=Mus musculus OX=10090 GN=Plpbp PE=1 SV=1;tr|Q80ZV3|Q80ZV3_MOUSE Proline synthetase co-transcribed OS=Mus musculus OX=10090 GN=Plpbp PE=1 SV=1;tr|Q6P8V7|Q6P8V7_MOUSE Proline sy	8	3	3	3	0	0	0	0	0	0	1	3	1	0	0	0	0	0	0	1	3	1	0	0	0	0	0	0	1	3	1	25.5	25.5	25.5	15.156	137	137;141;153;330;274;129;67;128	0	3.8208	0	0	0
A0A1B0GRU8;A0A6Q6PUT5;Q9R1C7	A0A1B0GRU8;A0A6Q6PUT5;Q9R1C7	14;14;14	14;14;14	14;14;14	Pre-mRNA-processing factor 40 homolog A	Prpf40a	tr|A0A1B0GRU8|A0A1B0GRU8_MOUSE Pre-mRNA processing factor 40A OS=Mus musculus OX=10090 GN=Prpf40a PE=1 SV=1;tr|A0A6Q6PUT5|A0A6Q6PUT5_MOUSE Pre-mRNA processing factor 40A (Fragment) OS=Mus musculus OX=10090 GN=Prpf40a PE=1 SV=1;sp|Q9R1C7|PR40A_MOUSE Pre-mRN	3	14	14	14	1	1	1	8	8	9	10	12	9	1	1	1	8	8	9	10	12	9	1	1	1	8	8	9	10	12	9	16.6	16.6	16.6	105.53	926	926;966;953	0	110.11	1.7	1.7	1.7
A0A1B0GS20;A0A1B0GRY3	A0A1B0GS20;A0A1B0GRY3	1;1	1;1	1;1			tr|A0A1B0GS20|A0A1B0GS20_MOUSE Predicted gene 45861 OS=Mus musculus OX=10090 GN=Gm45861 PE=1 SV=1;tr|A0A1B0GRY3|A0A1B0GRY3_MOUSE Predicted gene 45861 OS=Mus musculus OX=10090 GN=Gm45861 PE=1 SV=1	2	1	1	1	0	0	0	0	0	0	0	1	0	0	0	0	0	0	0	0	1	0	0	0	0	0	0	0	0	1	0	0.8	0.8	0.8	179.8	1629	1629;1923	0.004888	1.7326	0	0	0
A0A1B0GSB4;A0A1B0GSR3;Q8BZX4	A0A1B0GSB4;A0A1B0GSR3;Q8BZX4	5;5;5	5;5;5	5;5;5	Splicing regulatory glutamine/lysine-rich protein 1	Srek1	tr|A0A1B0GSB4|A0A1B0GSB4_MOUSE Splicing regulatory glutamine/lysine-rich protein 1 OS=Mus musculus OX=10090 GN=Srek1 PE=1 SV=1;tr|A0A1B0GSR3|A0A1B0GSR3_MOUSE Splicing regulatory glutamine/lysine-rich protein 1 (Fragment) OS=Mus musculus OX=10090 GN=Srek1 P	3	5	5	5	0	0	0	0	1	0	5	4	5	0	0	0	0	1	0	5	4	5	0	0	0	0	1	0	5	4	5	30.3	30.3	30.3	21.256	198	198;314;494	0	106.61	0	0	0
A0A1B0GSI1;Q8BUR4	A0A1B0GSI1;Q8BUR4	1;1	1;1	1;1	Dedicator of cytokinesis protein 1	Dock1	tr|A0A1B0GSI1|A0A1B0GSI1_MOUSE Dedicator of cytokinesis 1 OS=Mus musculus OX=10090 GN=Dock1 PE=1 SV=1;sp|Q8BUR4|DOCK1_MOUSE Dedicator of cytokinesis protein 1 OS=Mus musculus OX=10090 GN=Dock1 PE=1 SV=3	2	1	1	1	0	0	0	0	0	0	0	1	0	0	0	0	0	0	0	0	1	0	0	0	0	0	0	0	0	1	0	1.7	1.7	1.7	81.5	713	713;1865	0.0072289	1.6275	0	0	0
A2RSQ1;A0A1B0GSK9;F8WIH9	A2RSQ1;A0A1B0GSK9;F8WIH9	2;2;1	2;2;1	2;2;1	Beta-galactosidase-1-like protein 3	Glb1l3	sp|A2RSQ1|GLBL3_MOUSE Beta-galactosidase-1-like protein 3 OS=Mus musculus OX=10090 GN=Glb1l3 PE=1 SV=1;tr|A0A1B0GSK9|A0A1B0GSK9_MOUSE Beta-galactosidase OS=Mus musculus OX=10090 GN=Glb1l3 PE=1 SV=1;tr|F8WIH9|F8WIH9_MOUSE Galactosidase, beta 1 like 3 OS=Mus	3	2	2	2	1	0	0	0	1	0	0	1	0	1	0	0	0	1	0	0	1	0	1	0	0	0	1	0	0	1	0	3.5	3.5	3.5	73.921	649	649;662;587	0.0034144	2.0618	1.7	0	0
A0A1B0GSX0;P06151;A0A1B0GSR9;D3YZQ9;A0A1B0GT41;A0A1B0GQX5;A0A1B0GSL7;A0A1B0GRW9;A0A1B0GS79;A0A1B0GRC1;A0A1B0GRS2	A0A1B0GSX0;P06151;A0A1B0GSR9;D3YZQ9;A0A1B0GT41;A0A1B0GQX5;A0A1B0GSL7	22;21;20;15;12;12;11;6;6;5;5	20;19;18;13;10;10;10;6;6;5;5	19;18;17;12;9;9;9;6;6;5;5	L-lactate dehydrogenase A chain;L-lactate dehydrogenase	Ldha	tr|A0A1B0GSX0|A0A1B0GSX0_MOUSE L-lactate dehydrogenase OS=Mus musculus OX=10090 GN=Ldha PE=1 SV=1;sp|P06151|LDHA_MOUSE L-lactate dehydrogenase A chain OS=Mus musculus OX=10090 GN=Ldha PE=1 SV=3;tr|A0A1B0GSR9|A0A1B0GSR9_MOUSE L-lactate dehydrogenase OS=Mus	11	22	20	19	10	11	14	13	14	12	15	16	16	8	9	12	11	12	10	13	14	14	8	8	12	10	12	9	13	14	14	62.3	56.5	52.9	39.758	361	361;332;315;236;176;201;128;104;205;66;68	0	71.003	26.9	30.5	31.9
A0A1B0GX25;Q9Z2V5	A0A1B0GX25;Q9Z2V5	2;2	2;2	2;2	Histone deacetylase 6	Hdac6	tr|A0A1B0GX25|A0A1B0GX25_MOUSE Histone deacetylase 6 (Fragment) OS=Mus musculus OX=10090 GN=Hdac6 PE=1 SV=1;sp|Q9Z2V5|HDAC6_MOUSE Histone deacetylase 6 OS=Mus musculus OX=10090 GN=Hdac6 PE=1 SV=3	2	2	2	2	1	2	1	0	0	0	2	1	2	1	2	1	0	0	0	2	1	2	1	2	1	0	0	0	2	1	2	2.2	2.2	2.2	110.18	1008	1008;1149	0	4.343	1.4	2.2	1.4
O88374;A0A1B0GX27;O35855;A0A1B0GQY4	O88374;A0A1B0GX27;O35855;A0A1B0GQY4	2;2;2;1	2;2;2;1	2;2;2;1	Branched-chain-amino-acid aminotransferase;Branched-chain-amino-acid aminotransferase, mitochondrial	Bcat2	tr|O88374|O88374_MOUSE Branched-chain-amino-acid aminotransferase OS=Mus musculus OX=10090 GN=Bcat2 PE=1 SV=1;tr|A0A1B0GX27|A0A1B0GX27_MOUSE Branched-chain-amino-acid aminotransferase OS=Mus musculus OX=10090 GN=Bcat2 PE=1 SV=1;sp|O35855|BCAT2_MOUSE Branch	4	2	2	2	1	0	1	2	2	2	0	0	0	1	0	1	2	2	2	0	0	0	1	0	1	2	2	2	0	0	0	5.9	5.9	5.9	39.774	353	353;388;393;101	0	5.8016	3.7	0	2.3
G3UYQ2;A0A1B0GX81;G3UZT6;Q3UF95;Q9Z1R2;G3UXT8;G3UYZ0;G3V013	G3UYQ2;A0A1B0GX81;G3UZT6;Q3UF95;Q9Z1R2;G3UXT8	4;4;4;4;4;3;1;1	4;4;4;4;4;3;1;1	4;4;4;4;4;3;1;1	Large proline-rich protein BAG6	Bag6	tr|G3UYQ2|G3UYQ2_MOUSE Large proline-rich protein BAG6 OS=Mus musculus OX=10090 GN=Bag6 PE=1 SV=1;tr|A0A1B0GX81|A0A1B0GX81_MOUSE Large proline-rich protein BAG6 (Fragment) OS=Mus musculus OX=10090 GN=Bag6 PE=1 SV=1;tr|G3UZT6|G3UZT6_MOUSE Large proline-rich	8	4	4	4	1	3	2	2	3	2	2	2	1	1	3	2	2	3	2	2	2	1	1	3	2	2	3	2	2	2	1	4.1	4.1	4.1	113.37	1082	1082;1107;1122;1136;1154;563;209;253	0	6.3482	1.2	2.9	2.1
G5E8I8;A0A1D5RL92;Q8CGZ0	G5E8I8;A0A1D5RL92;Q8CGZ0	12;12;12	12;12;12	12;12;12	Calcium homeostasis endoplasmic reticulum protein	Cherp	tr|G5E8I8|G5E8I8_MOUSE Calcium homeostasis endoplasmic reticulum protein OS=Mus musculus OX=10090 GN=Cherp PE=1 SV=2;tr|A0A1D5RL92|A0A1D5RL92_MOUSE Calcium homeostasis endoplasmic reticulum protein OS=Mus musculus OX=10090 GN=Cherp PE=1 SV=1;sp|Q8CGZ0|CHER	3	12	12	12	0	0	1	2	3	3	8	8	8	0	0	1	2	3	3	8	8	8	0	0	1	2	3	3	8	8	8	16.2	16.2	16.2	107.67	949	949;938;936	0	72.277	0	0	0.7
A0A1D5RLD4;A0A1D5RML8;P97760	A0A1D5RLD4;A0A1D5RML8;P97760	1;1;1	1;1;1	1;1;1	DNA-directed RNA polymerase II subunit RPB3	Polr2c	tr|A0A1D5RLD4|A0A1D5RLD4_MOUSE Polymerase (RNA) II (DNA directed) polypeptide C (Fragment) OS=Mus musculus OX=10090 GN=Polr2c PE=1 SV=1;tr|A0A1D5RML8|A0A1D5RML8_MOUSE Polymerase (RNA) II (DNA directed) polypeptide C OS=Mus musculus OX=10090 GN=Polr2c PE=1	3	1	1	1	0	0	0	0	0	0	1	1	0	0	0	0	0	0	0	1	1	0	0	0	0	0	0	0	1	1	0	11.2	11.2	11.2	19.157	170	170;439;275	0.00046512	2.6977	0	0	0
A0A1D5RLD8;S4R1W8;S4R1N5	A0A1D5RLD8	14;2;1	1;0;0	1;0;0			tr|A0A1D5RLD8|A0A1D5RLD8_MOUSE Glyceraldehyde-3-phosphate dehydrogenase OS=Mus musculus OX=10090 GN=Gapdhrt2 PE=1 SV=1	3	14	1	1	9	7	7	8	12	12	13	13	11	1	1	1	1	1	0	1	1	0	1	1	1	1	1	0	1	1	0	54.4	4.2	4.2	35.812	333	333;55;57	0	8.4503	39.3	27.3	26.1
E9PUC5;Q8C0E9;F6Z9E6;A0A1D5RLK2;A0A1D5RMH7;Q2PFD7	E9PUC5;Q8C0E9;F6Z9E6;A0A1D5RLK2;A0A1D5RMH7;Q2PFD7	2;2;2;2;2;2	2;2;2;2;2;2	2;2;2;2;2;2	PH and SEC7 domain-containing protein 3	Psd3	tr|E9PUC5|E9PUC5_MOUSE Pleckstrin and Sec7 domain containing 3 OS=Mus musculus OX=10090 GN=Psd3 PE=1 SV=1;tr|Q8C0E9|Q8C0E9_MOUSE Pleckstrin and Sec7 domain containing 3 OS=Mus musculus OX=10090 GN=Psd3 PE=1 SV=1;tr|F6Z9E6|F6Z9E6_MOUSE Pleckstrin and Sec7 d	6	2	2	2	0	0	0	1	1	0	1	2	1	0	0	0	1	1	0	1	2	1	0	0	0	1	1	0	1	2	1	10.4	10.4	10.4	42.299	376	376;390;1005;1035;1289;1037	0	5.6712	0	0	0
A0A1D5RLK4;Q8C624	A0A1D5RLK4;Q8C624	3;3	3;3	3;3	Spermatogenesis-associated protein 33	Spata33	tr|A0A1D5RLK4|A0A1D5RLK4_MOUSE Spermatogenesis associated 33 OS=Mus musculus OX=10090 GN=Spata33 PE=1 SV=1;sp|Q8C624|SPT33_MOUSE Spermatogenesis-associated protein 33 OS=Mus musculus OX=10090 GN=Spata33 PE=1 SV=1	2	3	3	3	2	2	2	1	3	2	3	3	3	2	2	2	1	3	2	3	3	3	2	2	2	1	3	2	3	3	3	40.8	40.8	40.8	11.733	103	103;132	0	10.853	23.3	23.3	31.1
A0A1D5RLL3;Q8BG67	A0A1D5RLL3;Q8BG67	2;2	2;2	2;2	Protein EFR3 homolog A	Efr3a	tr|A0A1D5RLL3|A0A1D5RLL3_MOUSE EFR3 homolog A OS=Mus musculus OX=10090 GN=Efr3a PE=1 SV=1;sp|Q8BG67|EFR3A_MOUSE Protein EFR3 homolog A OS=Mus musculus OX=10090 GN=Efr3a PE=1 SV=1	2	2	2	2	1	2	1	1	2	1	0	0	0	1	2	1	1	2	1	0	0	0	1	2	1	1	2	1	0	0	0	4.3	4.3	4.3	95.684	846	846;819	0	3.9442	1.7	4.3	1.7
A0A1D5RLM0;E9PWU7;O35231	A0A1D5RLM0;E9PWU7;O35231	4;4;4	3;3;3	3;3;3	Kinesin-like protein;Kinesin-like protein KIFC3	Kifc3	tr|A0A1D5RLM0|A0A1D5RLM0_MOUSE Kinesin-like protein OS=Mus musculus OX=10090 GN=Kifc3 PE=1 SV=1;tr|E9PWU7|E9PWU7_MOUSE Kinesin-like protein OS=Mus musculus OX=10090 GN=Kifc3 PE=1 SV=1;sp|O35231|KIFC3_MOUSE Kinesin-like protein KIFC3 OS=Mus musculus OX=1009	3	4	3	3	1	1	0	2	2	2	2	3	3	0	1	0	1	1	1	1	2	3	0	1	0	1	1	1	1	2	3	6.7	5.1	5.1	77.44	687	687;778;824	0	6.5439	1.6	1.9	0
A0A1D5RLR0;Q9QZE7	A0A1D5RLR0;Q9QZE7	2;2	2;2	2;2	Translin-associated protein X	Tsnax	tr|A0A1D5RLR0|A0A1D5RLR0_MOUSE Translin-associated factor X OS=Mus musculus OX=10090 GN=Tsnax PE=1 SV=1;sp|Q9QZE7|TSNAX_MOUSE Translin-associated protein X OS=Mus musculus OX=10090 GN=Tsnax PE=1 SV=1	2	2	2	2	0	0	0	1	2	1	1	1	0	0	0	0	1	2	1	1	1	0	0	0	0	1	2	1	1	1	0	17.3	17.3	17.3	19.348	168	168;290	0.0017513	2.2538	0	0	0
A0A1D5RLS1;Q60902	A0A1D5RLS1;Q60902	2;2	2;2	2;2	Epidermal growth factor receptor substrate 15-like 1	Eps15l1	tr|A0A1D5RLS1|A0A1D5RLS1_MOUSE Epidermal growth factor receptor pathway substrate 15-like 1 OS=Mus musculus OX=10090 GN=Eps15l1 PE=1 SV=1;sp|Q60902|EP15R_MOUSE Epidermal growth factor receptor substrate 15-like 1 OS=Mus musculus OX=10090 GN=Eps15l1 PE=1 SV	2	2	2	2	0	0	0	0	0	0	2	0	0	0	0	0	0	0	0	2	0	0	0	0	0	0	0	0	2	0	0	7	7	7	66.204	599	599;907	0.00090703	2.5093	0	0	0
A0A1D5RLW2;Q6IMH0;F6TW27;A0A1D5RLZ0;D3YY82	A0A1D5RLW2;Q6IMH0;F6TW27	3;3;2;1;1	3;3;2;1;1	3;3;2;1;1	Testis, prostate and placenta-expressed protein	Tepp	tr|A0A1D5RLW2|A0A1D5RLW2_MOUSE Testis, prostate and placenta expressed OS=Mus musculus OX=10090 GN=Spmip8 PE=1 SV=1;sp|Q6IMH0|SMIP8_MOUSE Sperm microtubule inner protein 8 OS=Mus musculus OX=10090 GN=Spmip8 PE=1 SV=1;tr|F6TW27|F6TW27_MOUSE Testis, prostate	5	3	3	3	0	0	0	0	0	0	1	1	1	0	0	0	0	0	0	1	1	1	0	0	0	0	0	0	1	1	1	24.5	24.5	24.5	17.227	147	147;216;73;82;174	0	4.426	0	0	0
A0A1D5RLW5;A0A1D5RM85;P62717;A0A1D5RME4;A0A1D5RM79;A0A1D5RMC7	A0A1D5RLW5;A0A1D5RM85;P62717;A0A1D5RME4;A0A1D5RM79	5;5;5;4;3;1	5;5;5;4;3;1	5;5;5;4;3;1	60S ribosomal protein L18a	Rpl18a	tr|A0A1D5RLW5|A0A1D5RLW5_MOUSE 60S ribosomal protein L18a OS=Mus musculus OX=10090 GN=Rpl18a PE=1 SV=1;tr|A0A1D5RM85|A0A1D5RM85_MOUSE Large ribosomal subunit protein eL20 (Fragment) OS=Mus musculus OX=10090 GN=Rpl18a PE=1 SV=1;sp|P62717|RL18A_MOUSE Large r	6	5	5	5	5	3	3	2	1	2	1	1	1	5	3	3	2	1	2	1	1	1	5	3	3	2	1	2	1	1	1	27.2	27.2	27.2	17.447	147	147;219;176;123;109;70	0	6.3389	27.2	21.1	21.1
A0A1D5RM05;Q60779	A0A1D5RM05;Q60779	3;2	3;2	3;2	Growth arrest-specific protein 8	Gas8	tr|A0A1D5RM05|A0A1D5RM05_MOUSE Dynein regulatory complex subunit 4 OS=Mus musculus OX=10090 GN=Gas8 PE=1 SV=1;sp|Q60779|DRC4_MOUSE Dynein regulatory complex subunit 4 OS=Mus musculus OX=10090 GN=Gas8 PE=1 SV=2	2	3	3	3	1	0	1	0	0	0	0	2	1	1	0	1	0	0	0	0	2	1	1	0	1	0	0	0	0	2	1	6.8	6.8	6.8	55.661	469	469;478	0	3.742	1.9	0	1.9
A0A9L6JPS2;A0A1D5RMD1	A0A9L6JPS2;A0A1D5RMD1	7;7	7;7	7;7			tr|A0A9L6JPS2|A0A9L6JPS2_MOUSE IQ motif containing N OS=Mus musculus OX=10090 GN=Iqcn PE=1 SV=1;sp|A0A1D5RMD1|IQCN_MOUSE IQ domain-containing protein N OS=Mus musculus OX=10090 GN=Iqcn PE=1 SV=2	2	7	7	7	4	4	4	5	5	4	3	3	3	4	4	4	5	5	4	3	3	3	4	4	4	5	5	4	3	3	3	6.6	6.6	6.6	154.66	1434	1434;1437	0	30.623	4	3.8	4
B7ZWL1;A0A1D5RMJ8;Q6ZQ08;A0A1D5RMD8;A0A1D5RML9;A0A1D5RM04;A0A1D5RM03	B7ZWL1;A0A1D5RMJ8;Q6ZQ08;A0A1D5RMD8	12;12;12;7;3;2;1	12;12;12;7;3;2;1	12;12;12;7;3;2;1	CCR4-NOT transcription complex subunit 1	Cnot1	tr|B7ZWL1|B7ZWL1_MOUSE CCR4-NOT transcription complex, subunit 1 OS=Mus musculus OX=10090 GN=Cnot1 PE=1 SV=1;tr|A0A1D5RMJ8|A0A1D5RMJ8_MOUSE CCR4-NOT transcription complex, subunit 1 OS=Mus musculus OX=10090 GN=Cnot1 PE=1 SV=1;sp|Q6ZQ08|CNOT1_MOUSE CCR4-NOT	7	12	12	12	3	5	4	4	5	4	8	8	9	3	5	4	4	5	4	8	8	9	3	5	4	4	5	4	8	8	9	5.9	5.9	5.9	260.95	2326	2326;2369;2375;1614;823;122;213	0	24.337	1.3	2.1	1.7
A0A1D9BZF0	A0A1D9BZF0	3	3	3			sp|A0A1D9BZF0|GCNA_MOUSE Germ cell nuclear acidic protein OS=Mus musculus OX=10090 GN=Gcna PE=1 SV=1	1	3	3	3	0	0	0	0	0	0	1	1	3	0	0	0	0	0	0	1	1	3	0	0	0	0	0	0	1	1	3	7.7	7.7	7.7	53.393	507	507	0	6.1401	0	0	0
A0A1I7Q4A6;Q9CPQ5	A0A1I7Q4A6;Q9CPQ5	1;1	1;1	1;1	Centromere protein Q	Cenpq	tr|A0A1I7Q4A6|A0A1I7Q4A6_MOUSE Centromere protein Q OS=Mus musculus OX=10090 GN=Cenpq PE=3 SV=1;sp|Q9CPQ5|CENPQ_MOUSE Centromere protein Q OS=Mus musculus OX=10090 GN=Cenpq PE=2 SV=2	2	1	1	1	0	0	1	0	0	0	0	0	0	0	0	1	0	0	0	0	0	0	0	0	1	0	0	0	0	0	0	3.7	3.7	3.7	30.76	269	269;267	1	-2	0	0	3.7
A0A1I7Q4G8;E9QMN5;Q8CHY6	A0A1I7Q4G8;E9QMN5;Q8CHY6	8;8;8	8;8;8	8;8;8	Transcriptional repressor p66 alpha	Gatad2a	tr|A0A1I7Q4G8|A0A1I7Q4G8_MOUSE GATA zinc finger domain containing 2A OS=Mus musculus OX=10090 GN=Gatad2a PE=1 SV=1;tr|E9QMN5|E9QMN5_MOUSE GATA zinc finger domain containing 2A OS=Mus musculus OX=10090 GN=Gatad2a PE=1 SV=1;sp|Q8CHY6|P66A_MOUSE Transcription	3	8	8	8	0	0	0	1	3	4	5	4	5	0	0	0	1	3	4	5	4	5	0	0	0	1	3	4	5	4	5	16.9	16.9	16.9	65.434	614	614;630;629	0	14.309	0	0	0
A0A1L1SQ79;Q3UIL6;A0A0U1RPA0	A0A1L1SQ79;Q3UIL6;A0A0U1RPA0	2;2;1	2;2;1	2;2;1	Pleckstrin homology domain-containing family A member 7	Plekha7	tr|A0A1L1SQ79|A0A1L1SQ79_MOUSE Pleckstrin homology domain containing, family A member 7 (Fragment) OS=Mus musculus OX=10090 GN=Plekha7 PE=1 SV=1;sp|Q3UIL6|PKHA7_MOUSE Pleckstrin homology domain-containing family A member 7 OS=Mus musculus OX=10090 GN=Plekh	3	2	2	2	0	0	0	1	0	1	0	0	0	0	0	0	1	0	1	0	0	0	0	0	0	1	0	1	0	0	0	3.3	3.3	3.3	99.006	867	867;1118;1212	0.0017467	2.2418	0	0	0
A0A1L1SQA8;P62852	A0A1L1SQA8;P62852	7;7	7;7	7;7	40S ribosomal protein S25	Rps25	tr|A0A1L1SQA8|A0A1L1SQA8_MOUSE 40S ribosomal protein S25 OS=Mus musculus OX=10090 GN=Rps25 PE=1 SV=1;sp|P62852|RS25_MOUSE Small ribosomal subunit protein eS25 OS=Mus musculus OX=10090 GN=Rps25 PE=1 SV=1	2	7	7	7	3	2	3	3	2	1	3	3	3	3	2	3	3	2	1	3	3	3	3	2	3	3	2	1	3	3	3	60.2	60.2	60.2	10.309	93	93;125	0	10.946	28	28	37.6
A0A1L1SS47;A0A1L1SQF2;Q8BH15;A0A1L1SSE2;A0A5F8MPB8;A0A1L1SQA7	A0A1L1SS47;A0A1L1SQF2;Q8BH15;A0A1L1SSE2;A0A5F8MPB8;A0A1L1SQA7	2;2;2;1;1;1	2;2;2;1;1;1	2;2;2;1;1;1	CCR4-NOT transcription complex subunit 10	Cnot10	tr|A0A1L1SS47|A0A1L1SS47_MOUSE CCR4-NOT transcription complex subunit 10 OS=Mus musculus OX=10090 GN=Cnot10 PE=1 SV=1;tr|A0A1L1SQF2|A0A1L1SQF2_MOUSE CCR4-NOT transcription complex subunit 10 OS=Mus musculus OX=10090 GN=Cnot10 PE=1 SV=1;sp|Q8BH15|CNO10_MOUS	6	2	2	2	0	0	0	0	0	1	0	0	2	0	0	0	0	0	1	0	0	2	0	0	0	0	0	1	0	0	2	5.2	5.2	5.2	45.049	405	405;409;744;105;126;289	0	3.0152	0	0	0
A0A1L1SQR4;Q8VDR9;A0A1L1ST98;A0A1L1STJ1	A0A1L1SQR4;Q8VDR9	13;12;3;1	12;11;2;1	12;11;2;1	Dedicator of cytokinesis protein 6	Dock6	tr|A0A1L1SQR4|A0A1L1SQR4_MOUSE Dedicator of cytokinesis 6 OS=Mus musculus OX=10090 GN=Dock6 PE=1 SV=1;sp|Q8VDR9|DOCK6_MOUSE Dedicator of cytokinesis protein 6 OS=Mus musculus OX=10090 GN=Dock6 PE=1 SV=4	4	13	12	12	0	0	0	7	5	3	5	4	4	0	0	0	6	4	2	4	3	3	0	0	0	6	4	2	4	3	3	8.1	7.6	7.6	236.56	2111	2111;2080;577;477	0	16.558	0	0	0
A0A1L1SQV7;A0A1L1SVK0;Q61206	A0A1L1SQV7;A0A1L1SVK0;Q61206	1;1;1	1;1;1	1;1;1	Platelet-activating factor acetylhydrolase IB subunit beta	Pafah1b2	tr|A0A1L1SQV7|A0A1L1SQV7_MOUSE Platelet-activating factor acetylhydrolase, isoform 1b, subunit 2 (Fragment) OS=Mus musculus OX=10090 GN=Pafah1b2 PE=1 SV=1;tr|A0A1L1SVK0|A0A1L1SVK0_MOUSE Platelet-activating factor acetylhydrolase, isoform 1b, subunit 2 (Fra	3	1	1	1	1	1	1	1	1	1	0	0	0	1	1	1	1	1	1	0	0	0	1	1	1	1	1	1	0	0	0	8.4	8.4	8.4	11.863	107	107;197;229	0.0049362	1.7807	8.4	8.4	8.4
A0A1L1SR19;A0A5F8MPR6;Q9DB07	A0A1L1SR19;A0A5F8MPR6;Q9DB07	1;1;1	1;1;1	1;1;1	Intraflagellar transport protein 46 homolog	Ift46	tr|A0A1L1SR19|A0A1L1SR19_MOUSE Intraflagellar transport protein 46 homolog (Fragment) OS=Mus musculus OX=10090 GN=Ift46 PE=1 SV=2;tr|A0A5F8MPR6|A0A5F8MPR6_MOUSE Intraflagellar transport protein 46 homolog OS=Mus musculus OX=10090 GN=Ift46 PE=1 SV=2;sp|Q9DB	3	1	1	1	0	0	0	0	0	0	0	1	1	0	0	0	0	0	0	0	1	1	0	0	0	0	0	0	0	1	1	7.4	7.4	7.4	21.334	188	188;352;301	0.003397	2.0245	0	0	0
A0A1L1SR69;A0A1L1ST61;A0A1L1SV00;Q8R472;Q9JLR9	A0A1L1SR69;A0A1L1ST61;A0A1L1SV00;Q8R472;Q9JLR9	1;1;1;1;1	1;1;1;1;1	1;1;1;1;1	HIG1 domain family member 1A, mitochondrial	Higd1a	tr|A0A1L1SR69|A0A1L1SR69_MOUSE HIG1 domain family, member 1A (Fragment) OS=Mus musculus OX=10090 GN=Higd1a PE=1 SV=1;tr|A0A1L1ST61|A0A1L1ST61_MOUSE HIG1 domain family, member 1A (Fragment) OS=Mus musculus OX=10090 GN=Higd1a PE=1 SV=1;tr|A0A1L1SV00|A0A1L1SV	5	1	1	1	1	1	0	1	0	1	0	0	0	1	1	0	1	0	1	0	0	0	1	1	0	1	0	1	0	0	0	28.6	28.6	28.6	6.91	63	63;76;84;99;95	0	5.2069	28.6	28.6	0
Q08091;A0A1L1SRV0;A0A1L1SUB2	Q08091;A0A1L1SRV0;A0A1L1SUB2	2;2;1	2;2;1	2;2;1	Calponin-1	Cnn1	sp|Q08091|CNN1_MOUSE Calponin-1 OS=Mus musculus OX=10090 GN=Cnn1 PE=1 SV=1;tr|A0A1L1SRV0|A0A1L1SRV0_MOUSE Calponin OS=Mus musculus OX=10090 GN=Cnn1 PE=1 SV=1;tr|A0A1L1SUB2|A0A1L1SUB2_MOUSE Calponin (Fragment) OS=Mus musculus OX=10090 GN=Cnn1 PE=1 SV=1	3	2	2	2	0	0	0	1	0	1	0	0	1	0	0	0	1	0	1	0	0	1	0	0	0	1	0	1	0	0	1	8.1	8.1	8.1	33.355	297	297;238;233	0	3.1909	0	0	0
A0A1L1SS16;D3Z623	A0A1L1SS16;D3Z623	1;1	1;1	1;1		9330159F19Rik	tr|A0A1L1SS16|A0A1L1SS16_MOUSE RIKEN cDNA 9330159F19 gene OS=Mus musculus OX=10090 GN=9330159F19Rik PE=1 SV=1;tr|D3Z623|D3Z623_MOUSE RIKEN cDNA 9330159F19 gene OS=Mus musculus OX=10090 GN=9330159F19Rik PE=1 SV=2	2	1	1	1	0	0	0	1	0	0	1	1	1	0	0	0	1	0	0	1	1	1	0	0	0	1	0	0	1	1	1	4.3	4.3	4.3	24.854	211	211;648	0.009073	1.5019	0	0	0
A0A1L1SSA3;Q9CXU9;J3QN87;J3QPZ8	A0A1L1SSA3;Q9CXU9;J3QN87;J3QPZ8	2;2;1;1	1;1;0;0	1;1;0;0	Eukaryotic translation initiation factor 1b	Eif1b;Eif1	tr|A0A1L1SSA3|A0A1L1SSA3_MOUSE Eukaryotic translation initiation factor 1B (Fragment) OS=Mus musculus OX=10090 GN=Eif1b PE=1 SV=1;sp|Q9CXU9|EIF1B_MOUSE Eukaryotic translation initiation factor 1b OS=Mus musculus OX=10090 GN=Eif1b PE=1 SV=2;tr|J3QN87|J3QN87	4	2	1	1	0	0	0	0	0	0	2	2	0	0	0	0	0	0	0	1	1	0	0	0	0	0	0	0	1	1	0	49	33	33	11.358	100	100;113;90;110	0	29.136	0	0	0
A0A1L1SSU8;A0A1L1SQ69	A0A1L1SSU8;A0A1L1SQ69	12;6	2;2	2;2			tr|A0A1L1SSU8|A0A1L1SSU8_MOUSE Interleukin enhancer binding factor 3 (Fragment) OS=Mus musculus OX=10090 GN=Ilf3 PE=1 SV=1;tr|A0A1L1SQ69|A0A1L1SQ69_MOUSE Interleukin enhancer binding factor 3 (Fragment) OS=Mus musculus OX=10090 GN=Ilf3 PE=1 SV=1	2	12	2	2	0	0	0	11	11	11	10	10	11	0	0	0	1	1	1	2	2	2	0	0	0	1	1	1	2	2	2	66.1	6	6	18.861	168	168;77	0	3.7309	0	0	0
A0A1L1ST13;F6VG18;A0A1L1SSX7;Q9JHQ5	A0A1L1ST13;F6VG18;A0A1L1SSX7;Q9JHQ5	1;1;1;1	1;1;1;1	1;1;1;1	Leucine zipper transcription factor-like protein 1	Lztfl1	tr|A0A1L1ST13|A0A1L1ST13_MOUSE Leucine zipper transcription factor-like protein 1 (Fragment) OS=Mus musculus OX=10090 GN=Lztfl1 PE=1 SV=1;tr|F6VG18|F6VG18_MOUSE Leucine zipper transcription factor-like protein 1 (Fragment) OS=Mus musculus OX=10090 GN=Lztfl	4	1	1	1	1	1	1	1	1	1	0	0	0	1	1	1	1	1	1	0	0	0	1	1	1	1	1	1	0	0	0	9.2	9.2	9.2	24.109	207	207;218;290;299	0.0034159	2.0671	9.2	9.2	9.2
A0A1L1STB7;Q9D9D3	A0A1L1STB7;Q9D9D3	6;6	6;6	6;6		Tbc1d21	tr|A0A1L1STB7|A0A1L1STB7_MOUSE TBC1 domain family, member 21 OS=Mus musculus OX=10090 GN=Tbc1d21 PE=1 SV=1;sp|Q9D9D3|TBC21_MOUSE TBC1 domain family member 21 OS=Mus musculus OX=10090 GN=Tbc1d21 PE=1 SV=1	2	6	6	6	1	1	1	0	0	0	3	4	4	1	1	1	0	0	0	3	4	4	1	1	1	0	0	0	3	4	4	21.7	21.7	21.7	35.644	309	309;336	0	10.712	2.9	5.2	2.9
A0A1L1STE4;Q45VK5;A0A1L1SQR7;A0A1L1ST48;A0A1L1SU19;A0A1L1SR62	A0A1L1STE4;Q45VK5	70;63;16;12;5;4	1;0;0;0;0;0	1;0;0;0;0;0		Ilf3	tr|A0A1L1STE4|A0A1L1STE4_MOUSE Interleukin enhancer binding factor 3 OS=Mus musculus OX=10090 GN=Ilf3 PE=1 SV=1;tr|Q45VK5|Q45VK5_MOUSE Interleukin enhancer binding factor 3 OS=Mus musculus OX=10090 GN=Ilf3 PE=1 SV=1	6	70	1	1	4	3	5	60	62	60	63	61	64	0	0	0	1	1	1	1	1	1	0	0	0	1	1	1	1	1	1	61.2	1.1	1.1	97.452	908	908;703;177;214;126;74	0	3.4314	4.8	4.3	6.4
A0A1L1STE6;Q9D6R2	A0A1L1STE6;Q9D6R2	2;2	2;2	2;2	Isocitrate dehydrogenase [NAD] subunit alpha, mitochondrial	Idh3a	tr|A0A1L1STE6|A0A1L1STE6_MOUSE Isocitrate dehydrogenase [NAD] subunit, mitochondrial OS=Mus musculus OX=10090 GN=Idh3a PE=1 SV=1;sp|Q9D6R2|IDH3A_MOUSE Isocitrate dehydrogenase [NAD] subunit alpha, mitochondrial OS=Mus musculus OX=10090 GN=Idh3a PE=1 SV=1	2	2	2	2	2	1	1	0	0	0	0	0	0	2	1	1	0	0	0	0	0	0	2	1	1	0	0	0	0	0	0	5.5	5.5	5.5	41.52	384	384;366	0.0008881	2.3509	5.5	2.9	2.6
E9Q7C3;F8VPS6;A0A1L1SU27	E9Q7C3;F8VPS6;A0A1L1SU27	1;1;1	1;1;1	1;1;1		Plekhg4	tr|E9Q7C3|E9Q7C3_MOUSE Pleckstrin homology domain containing, family G (with RhoGef domain) member 4 OS=Mus musculus OX=10090 GN=Plekhg4 PE=1 SV=1;tr|F8VPS6|F8VPS6_MOUSE Pleckstrin homology domain containing, family G (with RhoGef domain) member 4 OS=Mus m	3	1	1	1	0	0	1	0	0	1	0	0	0	0	0	1	0	0	1	0	0	0	0	0	1	0	0	1	0	0	0	1.7	1.7	1.7	123.96	1112	1112;1181;1217	0.0072087	1.6085	0	0	1.7
A0A1L1SU87;Q62252	A0A1L1SU87;Q62252	3;3	3;3	3;3	Sperm surface protein Sp17	Spa17	tr|A0A1L1SU87|A0A1L1SU87_MOUSE Sperm surface protein Sp17 (Fragment) OS=Mus musculus OX=10090 GN=Spa17 PE=1 SV=1;sp|Q62252|SP17_MOUSE Sperm surface protein Sp17 OS=Mus musculus OX=10090 GN=Spa17 PE=1 SV=1	2	3	3	3	2	2	2	2	2	2	3	3	3	2	2	2	2	2	2	3	3	3	2	2	2	2	2	2	3	3	3	37.7	37.7	37.7	15.064	130	130;149	0	17.045	18.5	18.5	18.5
A0A1L1SUU4;Q9ERN0	A0A1L1SUU4	3;1	3;1	3;1			tr|A0A1L1SUU4|A0A1L1SUU4_MOUSE Secretory carrier-associated membrane protein (Fragment) OS=Mus musculus OX=10090 GN=Scamp2 PE=1 SV=1	2	3	3	3	2	2	2	1	1	2	1	1	1	2	2	2	1	1	2	1	1	1	2	2	2	1	1	2	1	1	1	17	17	17	22.088	200	200;329	0	5.5963	12	12	11
A0A1S6GWJ4;Q91VN6	A0A1S6GWJ4;Q91VN6	10;10	10;10	10;10	Probable ATP-dependent RNA helicase DDX41	Ddx41	tr|A0A1S6GWJ4|A0A1S6GWJ4_MOUSE RNA helicase OS=Mus musculus OX=10090 GN=Ddx41 PE=1 SV=1;sp|Q91VN6|DDX41_MOUSE Probable ATP-dependent RNA helicase DDX41 OS=Mus musculus OX=10090 GN=Ddx41 PE=1 SV=2	2	10	10	10	2	3	3	6	6	8	7	4	7	2	3	3	6	6	8	7	4	7	2	3	3	6	6	8	7	4	7	20.5	20.5	20.5	71.1	633	633;622	0	40.413	3.9	5.7	6
A0A1W2P6F6;A0A1W2P7Q9;Q60605;A0A1W2P6G5	A0A1W2P6F6;A0A1W2P7Q9;Q60605;A0A1W2P6G5	6;6;6;5	6;6;6;5	5;5;5;4	Myosin light polypeptide 6	Myl6	tr|A0A1W2P6F6|A0A1W2P6F6_MOUSE Myosin, light polypeptide 6, alkali, smooth muscle and non-muscle OS=Mus musculus OX=10090 GN=Myl6 PE=1 SV=1;tr|A0A1W2P7Q9|A0A1W2P7Q9_MOUSE Myosin, light polypeptide 6, alkali, smooth muscle and non-muscle OS=Mus musculus OX=	4	6	6	5	6	6	6	3	4	2	3	3	2	6	6	6	3	4	2	3	3	2	5	5	5	2	3	1	2	2	1	47.4	47.4	38.8	17.005	152	152;158;151;139	0	24.3	47.4	47.4	47.4
A0A1W2P6H1;Z4YJE4;E9QQ96;H7BX05;A2AAJ9	A0A1W2P6H1;Z4YJE4;E9QQ96;H7BX05;A2AAJ9	1;1;1;1;1	1;1;1;1;1	1;1;1;1;1	Obscurin	Obscn	tr|A0A1W2P6H1|A0A1W2P6H1_MOUSE non-specific serine/threonine protein kinase OS=Mus musculus OX=10090 GN=Obscn PE=1 SV=2;tr|Z4YJE4|Z4YJE4_MOUSE non-specific serine/threonine protein kinase OS=Mus musculus OX=10090 GN=Obscn PE=1 SV=3;tr|E9QQ96|E9QQ96_MOUSE n	5	1	1	1	1	0	0	1	0	0	0	1	0	1	0	0	1	0	0	0	1	0	1	0	0	1	0	0	0	1	0	0.3	0.3	0.3	725.77	6661	6661;7176;7496;8032;8886	0.003761	1.8549	0.3	0	0
Q91YE9;A0A1W2P7K9;A0A1W2P6X8;A0A1W2P7E9;A0A1Y7VK90;A0A1W2P7S7;A0A1W2P782;D6REF4;A0A1Y7VJB2;A0A1W2P7V4;D3Z145;A0A1W2P7D6;A0A1W2P893;A0A1W2P710;A0A1W2P6R5;A0A1W2P6J4;A0A1W2P7P9;A3KFX0;A0A1W2P7Q8	Q91YE9;A0A1W2P7K9;A0A1W2P6X8;A0A1W2P7E9;A0A1Y7VK90;A0A1W2P7S7;A0A1W2P782;D6REF4;A0A1Y7VJB2;A0A1W2P7V4	4;4;4;4;4;4;3;2;2;2;1;1;1;1;1;1;1;1;1	4;4;4;4;4;4;3;2;2;2;1;1;1;1;1;1;1;1;1	4;4;4;4;4;4;3;2;2;2;1;1;1;1;1;1;1;1;1	Cytosolic 5-nucleotidase 1B	Nt5c1b	sp|Q91YE9|5NT1B_MOUSE Cytosolic 5-nucleotidase 1B OS=Mus musculus OX=10090 GN=Nt5c1b PE=1 SV=2;tr|A0A1W2P7K9|A0A1W2P7K9_MOUSE 5-nucleotidase, cytosolic IB OS=Mus musculus OX=10090 GN=Nt5c1b PE=1 SV=1;tr|A0A1W2P6X8|A0A1W2P6X8_MOUSE 5-nucleotidase, cytoso	19	4	4	4	2	2	2	2	1	1	3	4	1	2	2	2	2	1	1	3	4	1	2	2	2	2	1	1	3	4	1	8.6	8.6	8.6	65.001	573	573;615;631;571;557;495;430;474;452;391;271;382;378;362;320;302;280;365;269	0	15.706	4.9	4.9	4.9
A0A1W2P832;A0A1W2P712;A0A2I3BRX9;Q6GYP7	A0A1W2P832;A0A1W2P712;A0A2I3BRX9;Q6GYP7	3;3;3;3	3;3;3;3	3;3;3;3	Ral GTPase-activating protein subunit alpha-1	Ralgapa1	tr|A0A1W2P832|A0A1W2P832_MOUSE Ral GTPase activating protein, alpha subunit 1 OS=Mus musculus OX=10090 GN=Ralgapa1 PE=1 SV=1;tr|A0A1W2P712|A0A1W2P712_MOUSE Ral GTPase activating protein, alpha subunit 1 OS=Mus musculus OX=10090 GN=Ralgapa1 PE=1 SV=1;tr|A0A	4	3	3	3	0	0	0	0	0	0	1	1	2	0	0	0	0	0	0	1	1	2	0	0	0	0	0	0	1	1	2	2.1	2.1	2.1	234.41	2082	2082;2082;2538;2035	0	4.6274	0	0	0
Q922D8;A0A1W2P733;A0A1W2P7L5	Q922D8;A0A1W2P733	4;4;1	4;4;1	4;4;1	C-1-tetrahydrofolate synthase, cytoplasmic;Methylenetetrahydrofolate dehydrogenase;Methenyltetrahydrofolate cyclohydrolase;Formyltetrahydrofolate synthetase;C-1-tetrahydrofolate synthase, cytoplasmic, N-terminally processed	Mthfd1	sp|Q922D8|C1TC_MOUSE C-1-tetrahydrofolate synthase, cytoplasmic OS=Mus musculus OX=10090 GN=Mthfd1 PE=1 SV=4;tr|A0A1W2P733|A0A1W2P733_MOUSE C-1-tetrahydrofolate synthase, cytoplasmic OS=Mus musculus OX=10090 GN=Mthfd1 PE=1 SV=1	3	4	4	4	3	2	1	1	0	2	1	0	0	3	2	1	1	0	2	1	0	0	3	2	1	1	0	2	1	0	0	6	6	6	101.2	935	935;755;160	0	5.2453	4.4	2.9	1.7
A0A1W2P754	A0A1W2P754	1	1	1			tr|A0A1W2P754|A0A1W2P754_MOUSE Trypsin domain containing 1 (Fragment) OS=Mus musculus OX=10090 GN=Tysnd1 PE=4 SV=1	1	1	1	1	0	0	0	0	0	0	1	0	1	0	0	0	0	0	0	1	0	1	0	0	0	0	0	0	1	0	1	18.6	18.6	18.6	11.065	102	102	0.0086888	1.5093	0	0	0
F8WI35;A0A1W2P768;P84244;P84228;P68433;P02301;E0CZ27;E0CYN1;E0CYR7	F8WI35;A0A1W2P768;P84244;P84228;P68433;P02301;E0CZ27	6;6;6;6;6;6;5;1;1	6;6;6;6;6;6;5;1;1	1;1;1;1;1;1;1;1;1	Histone H3;Histone H3.3;Histone H3.2;Histone H3.1;Histone H3.3C	H3f3a;Hist1h3b;Hist1h3a;H3f3c	tr|F8WI35|F8WI35_MOUSE Histone H3 OS=Mus musculus OX=10090 GN=H3f3a PE=1 SV=1;tr|A0A1W2P768|A0A1W2P768_MOUSE H3 clustered histone 14 OS=Mus musculus OX=10090 GN=H3c14 PE=1 SV=1;sp|P84244|H33_MOUSE Histone H3.3 OS=Mus musculus OX=10090 GN=H3-3a PE=1 SV=2;sp	9	6	6	1	4	3	3	4	4	4	5	5	3	4	3	3	4	4	4	5	5	3	1	1	0	0	1	1	1	1	0	28.1	28.1	6.7	15.199	135	135;181;136;136;136;136;119;52;55	0	11.071	20.7	20	14.1
A0A1W2P7A1;F7AEH4;P63323	A0A1W2P7A1;F7AEH4;P63323	9;9;9	9;9;9	9;9;9	40S ribosomal protein S12	Rps12	tr|A0A1W2P7A1|A0A1W2P7A1_MOUSE 40S ribosomal protein S12 OS=Mus musculus OX=10090 GN=Rps12 PE=1 SV=1;tr|F7AEH4|F7AEH4_MOUSE 40S ribosomal protein S12 OS=Mus musculus OX=10090 GN=Rps12 PE=1 SV=1;sp|P63323|RS12_MOUSE Small ribosomal subunit protein eS12 OS=M	3	9	9	9	5	7	6	4	3	5	6	7	6	5	7	6	4	3	5	6	7	6	5	7	6	4	3	5	6	7	6	57.4	57.4	57.4	15.978	148	148;137;132	0	49.692	39.2	53.4	41.2
A0A1W2P7H0;Q9CR11	A0A1W2P7H0;Q9CR11	1;1	1;1	1;1	YEATS domain-containing protein 4	Yeats4	tr|A0A1W2P7H0|A0A1W2P7H0_MOUSE YEATS domain containing 4 OS=Mus musculus OX=10090 GN=Yeats4 PE=1 SV=1;sp|Q9CR11|YETS4_MOUSE YEATS domain-containing protein 4 OS=Mus musculus OX=10090 GN=Yeats4 PE=2 SV=1	2	1	1	1	0	0	0	1	0	1	0	0	0	0	0	0	1	0	1	0	0	0	0	0	0	1	0	1	0	0	0	15.8	15.8	15.8	11.078	95	95;227	0	2.828	0	0	0
A0A1W2P7L7;P59708	A0A1W2P7L7;P59708	3;3	3;3	3;3	Splicing factor 3B subunit 6	Sf3b6	tr|A0A1W2P7L7|A0A1W2P7L7_MOUSE Splicing factor 3B, subunit 6 (Fragment) OS=Mus musculus OX=10090 GN=Sf3b6 PE=1 SV=1;sp|P59708|SF3B6_MOUSE Splicing factor 3B subunit 6 OS=Mus musculus OX=10090 GN=Sf3b6 PE=1 SV=1	2	3	3	3	0	0	0	1	1	1	1	2	2	0	0	0	1	1	1	1	2	2	0	0	0	1	1	1	1	2	2	33.3	33.3	33.3	13.037	111	111;125	0	6.8016	0	0	0
A0A1W2P7V9;Q91YS7;Q63932	A0A1W2P7V9;Q91YS7;Q63932	1;1;1	1;1;1	1;1;1	Dual specificity mitogen-activated protein kinase kinase 2	Map2k2	tr|A0A1W2P7V9|A0A1W2P7V9_MOUSE Mitogen-activated protein kinase kinase 2 (Fragment) OS=Mus musculus OX=10090 GN=Map2k2 PE=1 SV=1;tr|Q91YS7|Q91YS7_MOUSE Mitogen-activated protein kinase kinase 2 OS=Mus musculus OX=10090 GN=Map2k2 PE=1 SV=1;sp|Q63932|MP2K2_M	3	1	1	1	0	0	0	1	1	0	0	0	1	0	0	0	1	1	0	0	0	1	0	0	0	1	1	0	0	0	1	8.2	8.2	8.2	21.26	196	196;400;401	0	3.1745	0	0	0
E9QA61;A0A1W2P884	E9QA61;A0A1W2P884	2;2	2;2	2;2		Cep85l	tr|E9QA61|E9QA61_MOUSE Centrosomal protein 85-like OS=Mus musculus OX=10090 GN=Cep85l PE=1 SV=3;sp|A0A1W2P884|CE85L_MOUSE Centrosomal protein of 85 kDa-like OS=Mus musculus OX=10090 GN=Cep85l PE=3 SV=1	2	2	2	2	0	0	0	1	1	1	2	0	1	0	0	0	1	1	1	2	0	1	0	0	0	1	1	1	2	0	1	3	3	3	81.078	704	704;806	0	5.3058	0	0	0
A0A1Y7VIR0;Q60996;Q91V89;Q7TNL5	A0A1Y7VIR0;Q60996;Q91V89;Q7TNL5	2;2;1;1	2;2;1;1	2;2;1;1	Serine/threonine-protein phosphatase 2A 56 kDa regulatory subunit gamma isoform	Ppp2r5c;Ppp2r5d	tr|A0A1Y7VIR0|A0A1Y7VIR0_MOUSE Protein phosphatase 2, regulatory subunit B, gamma (Fragment) OS=Mus musculus OX=10090 GN=Ppp2r5c PE=1 SV=1;sp|Q60996|2A5G_MOUSE Serine/threonine-protein phosphatase 2A 56 kDa regulatory subunit gamma isoform OS=Mus musculus	4	2	2	2	0	0	0	1	1	1	1	2	2	0	0	0	1	1	1	1	2	2	0	0	0	1	1	1	1	2	2	9.5	9.5	9.5	32.844	283	283;524;594;595	0	6.5702	0	0	0
A0A1Y7VJ69;A0A1Y7VJF3;Q6P3Z4;A0A1Y7VLM5;P17141	A0A1Y7VJ69;A0A1Y7VJF3;Q6P3Z4;A0A1Y7VLM5;P17141	2;2;2;2;2	2;2;2;2;2	2;2;2;2;2	Zinc finger protein 37	Zfp37	tr|A0A1Y7VJ69|A0A1Y7VJ69_MOUSE Zinc finger protein 37 OS=Mus musculus OX=10090 GN=Zfp37 PE=1 SV=1;tr|A0A1Y7VJF3|A0A1Y7VJF3_MOUSE Zinc finger protein 37 OS=Mus musculus OX=10090 GN=Zfp37 PE=1 SV=1;tr|Q6P3Z4|Q6P3Z4_MOUSE Zinc finger protein 37 OS=Mus musculu	5	2	2	2	0	0	0	0	0	0	1	1	2	0	0	0	0	0	0	1	1	2	0	0	0	0	0	0	1	1	2	7.5	7.5	7.5	27.591	240	240;553;590;591;594	0	3.5462	0	0	0
A0A1Y7VJM4;Q8R2E9;A0A2I3BPM1;A0A1Y7VNF4;Q8R180	A0A1Y7VJM4;Q8R2E9;A0A2I3BPM1;A0A1Y7VNF4;Q8R180	2;2;1;1;1	2;2;1;1;1	2;2;1;1;1	ERO1-like protein beta;ERO1-like protein alpha	Ero1lb;Ero1l	tr|A0A1Y7VJM4|A0A1Y7VJM4_MOUSE Endoplasmic reticulum oxidoreductase 1 beta OS=Mus musculus OX=10090 GN=Ero1b PE=1 SV=1;sp|Q8R2E9|ERO1B_MOUSE ERO1-like protein beta OS=Mus musculus OX=10090 GN=Ero1b PE=1 SV=1;tr|A0A2I3BPM1|A0A2I3BPM1_MOUSE Endoplasmic retic	5	2	2	2	0	1	1	0	0	1	0	1	0	0	1	1	0	0	1	0	1	0	0	1	1	0	0	1	0	1	0	4.7	4.7	4.7	55.259	485	485;467;229;493;464	0	6.0558	0	2.3	2.3
A0A1Y7VLX7;E9Q5D6;P69566	A0A1Y7VLX7;E9Q5D6;P69566	1;1;1	1;1;1	1;1;1	Ran-binding protein 9	Ranbp9	tr|A0A1Y7VLX7|A0A1Y7VLX7_MOUSE RAN binding protein 9 (Fragment) OS=Mus musculus OX=10090 GN=Ranbp9 PE=1 SV=1;tr|E9Q5D6|E9Q5D6_MOUSE RAN binding protein 9 OS=Mus musculus OX=10090 GN=Ranbp9 PE=1 SV=1;sp|P69566|RANB9_MOUSE Ran-binding protein 9 OS=Mus muscul	3	1	1	1	0	0	0	1	1	1	0	0	0	0	0	0	1	1	1	0	0	0	0	0	0	1	1	1	0	0	0	9.5	9.5	9.5	15.789	148	148;710;653	0.00090293	2.4699	0	0	0
A0A1Y7VM54;Q9D1D4	A0A1Y7VM54;Q9D1D4	1;1	1;1	1;1	Transmembrane emp24 domain-containing protein 10	Tmed10	tr|A0A1Y7VM54|A0A1Y7VM54_MOUSE Transmembrane p24 trafficking protein 10 OS=Mus musculus OX=10090 GN=Tmed10 PE=1 SV=1;sp|Q9D1D4|TMEDA_MOUSE Transmembrane emp24 domain-containing protein 10 OS=Mus musculus OX=10090 GN=Tmed10 PE=1 SV=1	2	1	1	1	1	0	0	0	0	0	0	0	0	1	0	0	0	0	0	0	0	0	1	0	0	0	0	0	0	0	0	7.8	7.8	7.8	13.814	116	116;219	0.0083699	1.563	7.8	0	0
A0A1Y7VM77;E9QLN8;O70338	A0A1Y7VM77;E9QLN8;O70338	1;1;1	1;1;1	1;1;1	Ribonuclease H1	Rnaseh1	tr|A0A1Y7VM77|A0A1Y7VM77_MOUSE Ribonuclease H1 OS=Mus musculus OX=10090 GN=Rnaseh1 PE=1 SV=1;tr|E9QLN8|E9QLN8_MOUSE Ribonuclease H1 OS=Mus musculus OX=10090 GN=Rnaseh1 PE=1 SV=1;sp|O70338|RNH1_MOUSE Ribonuclease H1 OS=Mus musculus OX=10090 GN=Rnaseh1 PE=2	3	1	1	1	0	0	0	0	0	0	1	0	1	0	0	0	0	0	0	1	0	1	0	0	0	0	0	0	1	0	1	5.1	5.1	5.1	22.069	198	198;285;285	0.00046468	2.6898	0	0	0
A0A1Y7VMH3;Q80X41	A0A1Y7VMH3;Q80X41	7;7	7;7	7;7	Serine/threonine-protein kinase VRK1	Vrk1	tr|A0A1Y7VMH3|A0A1Y7VMH3_MOUSE Vaccinia related kinase 1 OS=Mus musculus OX=10090 GN=Vrk1 PE=1 SV=1;sp|Q80X41|VRK1_MOUSE Serine/threonine-protein kinase VRK1 OS=Mus musculus OX=10090 GN=Vrk1 PE=1 SV=2	2	7	7	7	0	0	0	0	1	1	6	5	5	0	0	0	0	1	1	6	5	5	0	0	0	0	1	1	6	5	5	20.8	20.8	20.8	46.845	413	413;440	0	42.827	0	0	0
A0A1Y7VNT1;E9QKB2;Q9JKS5	A0A1Y7VNT1;E9QKB2;Q9JKS5	4;4;4	4;4;4	4;4;4	Intracellular hyaluronan-binding protein 4	Habp4	tr|A0A1Y7VNT1|A0A1Y7VNT1_MOUSE Hyaluronic acid binding protein 4 OS=Mus musculus OX=10090 GN=Habp4 PE=1 SV=1;tr|E9QKB2|E9QKB2_MOUSE Hyaluronic acid binding protein 4 OS=Mus musculus OX=10090 GN=Habp4 PE=1 SV=1;sp|Q9JKS5|HABP4_MOUSE Intracellular hyaluronan	3	4	4	4	1	1	1	1	0	0	0	2	2	1	1	1	1	0	0	0	2	2	1	1	1	1	0	0	0	2	2	15.8	15.8	15.8	38.147	342	342;412;411	0	8.4833	4.4	4.4	4.4
A0A1Y7VNZ6;Q03141;Q8VHJ5;A0A1Y7VK86;A0A1Y7VJB1	A0A1Y7VNZ6;Q03141;Q8VHJ5	6;6;4;1;1	2;2;1;1;1	2;2;1;1;1	MAP/microtubule affinity-regulating kinase 3;Serine/threonine-protein kinase MARK1	Mark3;Mark1	tr|A0A1Y7VNZ6|A0A1Y7VNZ6_MOUSE non-specific serine/threonine protein kinase OS=Mus musculus OX=10090 GN=Mark3 PE=1 SV=1;sp|Q03141|MARK3_MOUSE MAP/microtubule affinity-regulating kinase 3 OS=Mus musculus OX=10090 GN=Mark3 PE=1 SV=2;sp|Q8VHJ5|MARK1_MOUSE Ser	5	6	2	2	0	0	0	2	2	2	4	4	3	0	0	0	1	1	1	1	1	1	0	0	0	1	1	1	1	1	1	7.7	2.9	2.9	88.828	797	797;753;795;54;111	0.00046168	2.648	0	0	0
A0A286YD58;A0A286YDU3;Q9DCR2	A0A286YD58;A0A286YDU3;Q9DCR2	2;2;2	2;2;2	2;2;2	AP-3 complex subunit sigma-1	Ap3s1	tr|A0A286YD58|A0A286YD58_MOUSE Adaptor-related protein complex 3, sigma 1 subunit OS=Mus musculus OX=10090 GN=Ap3s1 PE=1 SV=1;tr|A0A286YDU3|A0A286YDU3_MOUSE AP complex subunit sigma OS=Mus musculus OX=10090 GN=Ap3s1 PE=1 SV=1;sp|Q9DCR2|AP3S1_MOUSE AP-3 com	3	2	2	2	0	0	0	0	1	0	1	2	1	0	0	0	0	1	0	1	2	1	0	0	0	0	1	0	1	2	1	50	50	50	6.4022	54	54;162;193	0	5.0891	0	0	0
A0A286YDG5;Q8CG46	A0A286YDG5;Q8CG46	15;15	15;15	15;15	Structural maintenance of chromosomes protein 5	Smc5	tr|A0A286YDG5|A0A286YDG5_MOUSE Structural maintenance of chromosomes protein 5 OS=Mus musculus OX=10090 GN=Smc5 PE=1 SV=1;sp|Q8CG46|SMC5_MOUSE Structural maintenance of chromosomes protein 5 OS=Mus musculus OX=10090 GN=Smc5 PE=1 SV=1	2	15	15	15	0	0	0	10	7	8	11	10	14	0	0	0	10	7	8	11	10	14	0	0	0	10	7	8	11	10	14	16.3	16.3	16.3	119.26	1011	1011;1101	0	46.058	0	0	0
A0A286YDQ5;Q69ZR9	A0A286YDQ5;Q69ZR9	1;1	1;1	1;1	Protein FAM208A	Fam208a	tr|A0A286YDQ5|A0A286YDQ5_MOUSE Transcription activation suppressor (Fragment) OS=Mus musculus OX=10090 GN=Tasor PE=1 SV=1;sp|Q69ZR9|TASOR_MOUSE Protein TASOR OS=Mus musculus OX=10090 GN=Tasor PE=1 SV=2	2	1	1	1	0	0	0	1	0	0	0	1	1	0	0	0	1	0	0	0	1	1	0	0	0	1	0	0	0	1	1	4.4	4.4	4.4	32.858	293	293;1610	0.002172	2.2063	0	0	0
A0A286YDU2	A0A286YDU2	7	1	1			tr|A0A286YDU2|A0A286YDU2_MOUSE Ataxin 2 (Fragment) OS=Mus musculus OX=10090 GN=Atxn2 PE=1 SV=1	1	7	1	1	0	0	0	2	3	4	7	5	5	0	0	0	1	1	1	1	1	1	0	0	0	1	1	1	1	1	1	31.6	3.7	3.7	43.063	402	402	0	9.4211	0	0	0
A0A286YDW8;Q99JI4	A0A286YDW8;Q99JI4	1;1	1;1	1;1	26S proteasome non-ATPase regulatory subunit 6	Psmd6	tr|A0A286YDW8|A0A286YDW8_MOUSE Proteasome (prosome, macropain) 26S subunit, non-ATPase, 6 (Fragment) OS=Mus musculus OX=10090 GN=Psmd6 PE=1 SV=1;sp|Q99JI4|PSMD6_MOUSE 26S proteasome non-ATPase regulatory subunit 6 OS=Mus musculus OX=10090 GN=Psmd6 PE=1 SV=	2	1	1	1	0	0	0	0	0	0	1	1	1	0	0	0	0	0	0	1	1	1	0	0	0	0	0	0	1	1	1	7.8	7.8	7.8	22.824	192	192;389	0	3.1751	0	0	0
A0A286YE25;Q9QYY8;A0A286YCJ4;A0A3B2WC92	A0A286YE25;Q9QYY8;A0A286YCJ4;A0A3B2WC92	2;2;1;1	2;2;1;1	2;2;1;1	Spastin	Spast	tr|A0A286YE25|A0A286YE25_MOUSE Spastin OS=Mus musculus OX=10090 GN=Spast PE=1 SV=1;sp|Q9QYY8|SPAST_MOUSE Spastin OS=Mus musculus OX=10090 GN=Spast PE=1 SV=3;tr|A0A286YCJ4|A0A286YCJ4_MOUSE Spastin (Fragment) OS=Mus musculus OX=10090 GN=Spast PE=1 SV=1;tr|A0	4	2	2	2	0	0	0	0	0	0	0	1	1	0	0	0	0	0	0	0	1	1	0	0	0	0	0	0	0	1	1	4.9	4.9	4.9	66.384	613	613;614;300;581	0	3.3651	0	0	0
A0A286YEB1;A0A0R4J2A7;S4R170;S4R211;S4R2U3;Q3UHI0	A0A286YEB1;A0A0R4J2A7	4;3;1;1;1;1	4;3;1;1;1;1	4;3;1;1;1;1			tr|A0A286YEB1|A0A286YEB1_MOUSE Coiled-coil serine rich 2 OS=Mus musculus OX=10090 GN=Ccser2 PE=1 SV=1;tr|A0A0R4J2A7|A0A0R4J2A7_MOUSE Coiled-coil serine rich 2 OS=Mus musculus OX=10090 GN=Ccser2 PE=1 SV=1	6	4	4	4	0	0	0	3	4	3	4	4	4	0	0	0	3	4	3	4	4	4	0	0	0	3	4	3	4	4	4	16.8	16.8	16.8	41.409	375	375;485;204;261;277;833	0	25.932	0	0	0
A0A2C9F2B5;Q8BX57	A0A2C9F2B5;Q8BX57	1;1	1;1	1;1	PX domain-containing protein kinase-like protein	Pxk	tr|A0A2C9F2B5|A0A2C9F2B5_MOUSE PX domain containing serine/threonine kinase OS=Mus musculus OX=10090 GN=Pxk PE=1 SV=1;sp|Q8BX57|PXK_MOUSE PX domain-containing protein kinase-like protein OS=Mus musculus OX=10090 GN=Pxk PE=1 SV=2	2	1	1	1	0	0	0	0	0	0	1	0	1	0	0	0	0	0	0	1	0	1	0	0	0	0	0	0	1	0	1	2.1	2.1	2.1	65.159	581	581;582	0.0071971	1.5964	0	0	0
A0A2I3BPC5;P48455	A0A2I3BPC5;P48455	4;4	4;4	4;4	Serine/threonine-protein phosphatase 2B catalytic subunit gamma isoform	Ppp3cc	tr|A0A2I3BPC5|A0A2I3BPC5_MOUSE Serine/threonine-protein phosphatase OS=Mus musculus OX=10090 GN=Ppp3cc PE=1 SV=1;sp|P48455|PP2BC_MOUSE Serine/threonine-protein phosphatase 2B catalytic subunit gamma isoform OS=Mus musculus OX=10090 GN=Ppp3cc PE=1 SV=1	2	4	4	4	2	1	1	2	0	1	1	0	1	2	1	1	2	0	1	1	0	1	2	1	1	2	0	1	1	0	1	9.4	9.4	9.4	59.73	522	522;513	0	5.953	5.6	3.3	2.3
E9PYB3;A0A2I3BPE8	E9PYB3;A0A2I3BPE8	1;1	1;1	1;1	Olfactory receptor	Olfr592	tr|E9PYB3|E9PYB3_MOUSE Olfactory receptor OS=Mus musculus OX=10090 GN=Or52j3 PE=3 SV=1;tr|A0A2I3BPE8|A0A2I3BPE8_MOUSE Olfactory receptor OS=Mus musculus OX=10090 GN=Or52j3 PE=3 SV=1	2	1	1	1	0	0	0	1	0	0	0	0	0	0	0	0	1	0	0	0	0	0	0	0	0	1	0	0	0	0	0	3.8	3.8	3.8	35.239	312	312;323	0.0083532	1.5576	0	0	0
A0A2I3BPM0;F8WGA9;Q6GTE9;Q9Z1J2	A0A2I3BPM0;F8WGA9;Q6GTE9;Q9Z1J2	1;1;1;1	1;1;1;1	1;1;1;1	Serine/threonine-protein kinase Nek4	Nek4	tr|A0A2I3BPM0|A0A2I3BPM0_MOUSE NIMA (never in mitosis gene a)-related expressed kinase 4 (Fragment) OS=Mus musculus OX=10090 GN=Nek4 PE=1 SV=1;tr|F8WGA9|F8WGA9_MOUSE NIMA (never in mitosis gene a)-related expressed kinase 4 OS=Mus musculus OX=10090 GN=Nek4	4	1	1	1	0	0	0	1	0	1	0	0	0	0	0	0	1	0	1	0	0	0	0	0	0	1	0	1	0	0	0	3.3	3.3	3.3	70.332	630	630;737;792;792	0	5.1634	0	0	0
Q8CBY1;A0A2I3BPM7;A0A2I3BRV2	Q8CBY1;A0A2I3BPM7	14;14;4	14;14;4	14;14;4	Protein Smaug homolog 1	Samd4a	sp|Q8CBY1|SMAG1_MOUSE Protein Smaug homolog 1 OS=Mus musculus OX=10090 GN=Samd4a PE=1 SV=2;tr|A0A2I3BPM7|A0A2I3BPM7_MOUSE Sterile alpha motif domain containing 4 OS=Mus musculus OX=10090 GN=Samd4 PE=1 SV=1	3	14	14	14	0	0	1	5	3	4	9	10	9	0	0	1	5	3	4	9	10	9	0	0	1	5	3	4	9	10	9	24.5	24.5	24.5	78.359	711	711;522;114	0	42.7	0	0	2.1
A0A2I3BPN6;E9QAP7	A0A2I3BPN6;E9QAP7	3;3	3;3	3;3		Taf4a	tr|A0A2I3BPN6|A0A2I3BPN6_MOUSE TATA-box binding protein associated factor 4 OS=Mus musculus OX=10090 GN=Taf4 PE=1 SV=1;tr|E9QAP7|E9QAP7_MOUSE TATA-box binding protein associated factor 4 OS=Mus musculus OX=10090 GN=Taf4 PE=1 SV=1	2	3	3	3	0	0	0	1	0	0	2	3	2	0	0	0	1	0	0	2	3	2	0	0	0	1	0	0	2	3	2	3.7	3.7	3.7	104.16	1030	1030;1042	0	13.343	0	0	0
E9Q784;A0A2I3BPQ5	E9Q784;A0A2I3BPQ5	4;4	4;4	4;4		Zc3h13	sp|E9Q784|ZC3HD_MOUSE Zinc finger CCCH domain-containing protein 13 OS=Mus musculus OX=10090 GN=Zc3h13 PE=1 SV=1;tr|A0A2I3BPQ5|A0A2I3BPQ5_MOUSE Zinc finger CCCH type containing 13 OS=Mus musculus OX=10090 GN=Zc3h13 PE=1 SV=1	2	4	4	4	0	0	0	0	0	0	2	3	2	0	0	0	0	0	0	2	3	2	0	0	0	0	0	0	2	3	2	2.6	2.6	2.6	203.75	1729	1729;1730	0	5.8152	0	0	0
A0A2I3BQD5;A0A2I3BRL7;Q5M8N4	A0A2I3BQD5;A0A2I3BRL7;Q5M8N4	1;1;1	1;1;1	1;1;1	Epimerase family protein SDR39U1	Sdr39u1	tr|A0A2I3BQD5|A0A2I3BQD5_MOUSE Short chain dehydrogenase/reductase family 39U, member 1 OS=Mus musculus OX=10090 GN=Sdr39u1 PE=1 SV=1;tr|A0A2I3BRL7|A0A2I3BRL7_MOUSE Short chain dehydrogenase/reductase family 39U, member 1 OS=Mus musculus OX=10090 GN=Sdr39u	3	1	1	1	0	0	0	0	1	1	0	0	0	0	0	0	0	1	1	0	0	0	0	0	0	0	1	1	0	0	0	29.7	29.7	29.7	6.9882	64	64;147;293	0.0030108	2.1299	0	0	0
A0A2I3BQF4;P62889	A0A2I3BQF4;P62889	3;3	3;3	3;3	60S ribosomal protein L30	Rpl30	tr|A0A2I3BQF4|A0A2I3BQF4_MOUSE Large ribosomal subunit protein eL30 OS=Mus musculus OX=10090 GN=Rpl30 PE=1 SV=1;sp|P62889|RL30_MOUSE Large ribosomal subunit protein eL30 OS=Mus musculus OX=10090 GN=Rpl30 PE=1 SV=2	2	3	3	3	3	3	3	1	2	2	1	1	1	3	3	3	1	2	2	1	1	1	3	3	3	1	2	2	1	1	1	42.6	42.6	42.6	10.457	94	94;115	0	23.274	42.6	42.6	42.6
Q923T9;A0A2I3BQP6;P28652;Q5SVI3;Q5SVI1;Q5SVJ0;Q68EG2;Q5SVI2;A0A286YCW8;Q5SVI9;Q5SVI0;Q5SVJ1;A0A286YDK9;F6WHR9;A0A286YDL6;A0A286YCB8;P11798;F8WIS9;A0A286YCH4	Q923T9;A0A2I3BQP6;P28652;Q5SVI3;Q5SVI1;Q5SVJ0;Q68EG2;Q5SVI2;A0A286YCW8;Q5SVI9;Q5SVI0;Q5SVJ1	6;6;3;3;3;3;3;3;3;3;3;3;2;2;2;2;2;2;1	6;6;3;3;3;3;3;3;3;3;3;3;2;2;2;2;2;2;1	4;4;2;2;2;2;2;2;3;2;2;2;2;0;2;2;0;0;1	Calcium/calmodulin-dependent protein kinase type II subunit gamma;Calcium/calmodulin-dependent protein kinase type II subunit beta	Camk2g;Camk2b	sp|Q923T9|KCC2G_MOUSE Calcium/calmodulin-dependent protein kinase type II subunit gamma OS=Mus musculus OX=10090 GN=Camk2g PE=1 SV=1;tr|A0A2I3BQP6|A0A2I3BQP6_MOUSE calcium/calmodulin-dependent protein kinase OS=Mus musculus OX=10090 GN=Camk2g PE=1 SV=1;sp|	19	6	6	4	3	2	1	2	1	1	3	5	3	3	2	1	2	1	1	3	5	3	3	2	1	1	0	1	2	3	1	13.2	13.2	9.3	59.606	529	529;565;542;518;589;666;545;529;274;479;518;503;168;177;241;224;478;489;190	0	11.736	6.8	4.3	2.1
A2A4W9;A0A2I3BR20;A0A2I3BRA9;A0A2R8W6K5;A0A2I3BRU6;A0A2K6EDK7;A0A2R8VI79;A0A2R8VK79;Q8BIF2;Q9JJ43;Q8BP71	A2A4W9;A0A2I3BR20;A0A2I3BRA9;A0A2R8W6K5;A0A2I3BRU6;A0A2K6EDK7;A0A2R8VI79;A0A2R8VK79;Q8BIF2;Q9JJ43;Q8BP71	1;1;1;1;1;1;1;1;1;1;1	1;1;1;1;1;1;1;1;1;1;1	1;1;1;1;1;1;1;1;1;1;1	RNA binding protein fox-1 homolog 3;RNA binding protein fox-1 homolog 1;RNA binding protein fox-1 homolog 2	Rbfox3;Rbfox1;Rbfox2	tr|A2A4W9|A2A4W9_MOUSE RNA binding protein, fox-1 homolog (C. elegans) 3 (Fragment) OS=Mus musculus OX=10090 GN=Rbfox3 PE=1 SV=1;tr|A0A2I3BR20|A0A2I3BR20_MOUSE RNA binding protein, fox-1 homolog (C. elegans) 2 (Fragment) OS=Mus musculus OX=10090 GN=Rbfox2	11	1	1	1	0	0	0	1	1	1	0	0	1	0	0	0	1	1	1	0	0	1	0	0	0	1	1	1	0	0	1	5.9	5.9	5.9	18.709	169	169;201;275;289;300;349;358;396;374;396;449	0.00089405	2.4011	0	0	0
A0A2I3BRL8;Q91VM5;A2AFI4;A0A2I3BQC0	A0A2I3BRL8;Q91VM5	29;29;10;5	28;28;9;4	9;9;0;0	RNA binding motif protein, X-linked-like-1	Rbmxl1	tr|A0A2I3BRL8|A0A2I3BRL8_MOUSE Predicted gene 7324 OS=Mus musculus OX=10090 GN=Gm7324 PE=4 SV=1;sp|Q91VM5|RMXL1_MOUSE RNA binding motif protein, X-linked-like-1 OS=Mus musculus OX=10090 GN=Rbmxl1 PE=2 SV=1	4	29	28	9	0	1	0	20	15	15	26	23	27	0	0	0	19	14	14	25	22	26	0	0	0	6	2	3	8	6	8	57	57	17.8	42.178	388	388;388;103;30	0	181.87	0	2.1	0
Q8K0M3;A0A2I3BS41;Q9R1Z8	Q8K0M3;A0A2I3BS41;Q9R1Z8	16;16;16	16;16;16	16;16;16	Vinexin	Sorbs3	tr|Q8K0M3|Q8K0M3_MOUSE Sorbin and SH3 domain containing 3 OS=Mus musculus OX=10090 GN=Sorbs3 PE=1 SV=1;tr|A0A2I3BS41|A0A2I3BS41_MOUSE Sorbin and SH3 domain containing 3 OS=Mus musculus OX=10090 GN=Sorbs3 PE=1 SV=1;sp|Q9R1Z8|VINEX_MOUSE Vinexin OS=Mus muscu	3	16	16	16	4	5	3	11	13	11	11	12	11	4	5	3	11	13	11	11	12	11	4	5	3	11	13	11	11	12	11	34	34	34	76.711	680	680;715;733	0	62.358	9	12.1	6.8
A0A2K6EDM5;Q8C181	A0A2K6EDM5;Q8C181	7;7	3;3	2;2	Muscleblind-like protein 2	Mbnl2	tr|A0A2K6EDM5|A0A2K6EDM5_MOUSE Muscleblind like splicing factor 2 OS=Mus musculus OX=10090 GN=Mbnl2 PE=1 SV=1;sp|Q8C181|MBNL2_MOUSE Muscleblind-like protein 2 OS=Mus musculus OX=10090 GN=Mbnl2 PE=2 SV=2	2	7	3	2	0	0	0	4	5	4	5	4	6	0	0	0	1	2	1	2	1	2	0	0	0	1	1	1	1	1	2	20.3	12.5	10.4	41.317	385	385;373	0	20.129	0	0	0
A0A2R8VHH1;Q99P88	A0A2R8VHH1;Q99P88	1;1	1;1	1;1	Nuclear pore complex protein Nup155	Nup155	tr|A0A2R8VHH1|A0A2R8VHH1_MOUSE Nucleoporin 155 OS=Mus musculus OX=10090 GN=Nup155 PE=1 SV=1;sp|Q99P88|NU155_MOUSE Nuclear pore complex protein Nup155 OS=Mus musculus OX=10090 GN=Nup155 PE=1 SV=1	2	1	1	1	0	0	0	0	0	0	0	0	1	0	0	0	0	0	0	0	0	1	0	0	0	0	0	0	0	0	1	0.7	0.7	0.7	150.14	1346	1346;1391	0.0049444	1.7877	0	0	0
A0A2R8VHJ4;Q9CPQ3	A0A2R8VHJ4;Q9CPQ3	1;1	1;1	1;1	Mitochondrial import receptor subunit TOM22 homolog	Tomm22	tr|A0A2R8VHJ4|A0A2R8VHJ4_MOUSE Translocase of outer mitochondrial membrane 22 OS=Mus musculus OX=10090 GN=Tomm22 PE=1 SV=1;sp|Q9CPQ3|TOM22_MOUSE Mitochondrial import receptor subunit TOM22 homolog OS=Mus musculus OX=10090 GN=Tomm22 PE=1 SV=3	2	1	1	1	0	1	1	1	1	1	1	1	1	0	1	1	1	1	1	1	1	1	0	1	1	1	1	1	1	1	1	34.4	34.4	34.4	6.587	61	61;142	0	18.944	0	34.4	34.4
A0A2R8VHK1;Q9D0M3	A0A2R8VHK1;Q9D0M3	3;3	3;3	3;3	Cytochrome c1, heme protein, mitochondrial	Cyc1	tr|A0A2R8VHK1|A0A2R8VHK1_MOUSE Cytochrome c-1 (Fragment) OS=Mus musculus OX=10090 GN=Cyc1 PE=1 SV=1;sp|Q9D0M3|CY1_MOUSE Cytochrome c1, heme protein, mitochondrial OS=Mus musculus OX=10090 GN=Cyc1 PE=1 SV=1	2	3	3	3	0	0	1	0	0	2	2	2	2	0	0	1	0	0	2	2	2	2	0	0	1	0	0	2	2	2	2	27.3	27.3	27.3	17.861	165	165;325	0	6.1538	0	0	7.9
A0A2R8VHP9;Q3TT81;A0A2R8VHN3;A0A2R8VKF0;A0A2R8VHL8;A0A2R8VI15;A0A2R8VHI3	A0A2R8VHP9;Q3TT81;A0A2R8VHN3;A0A2R8VKF0;A0A2R8VHL8	18;16;9;9;9;6;5	3;3;0;3;3;1;0	0;0;0;0;0;0;0		Pcbp2	tr|A0A2R8VHP9|A0A2R8VHP9_MOUSE Poly(rC) binding protein 2 OS=Mus musculus OX=10090 GN=Pcbp2 PE=1 SV=1;tr|Q3TT81|Q3TT81_MOUSE Poly(rC) binding protein 2 OS=Mus musculus OX=10090 GN=Pcbp2 PE=1 SV=1;tr|A0A2R8VHN3|A0A2R8VHN3_MOUSE Poly(rC) binding protein 2 (F	7	18	3	0	4	5	4	9	7	7	13	15	15	0	0	0	1	0	0	2	3	1	0	0	0	0	0	0	0	0	0	82.1	16.1	0	35.346	335	335;322;168;190;225;192;96	0	64.225	17.3	23	18.8
A0A2R8VHX5;Q8VD12	A0A2R8VHX5;Q8VD12	26;24	26;24	26;24	Zinc finger protein 385A	Znf385a	tr|A0A2R8VHX5|A0A2R8VHX5_MOUSE Zinc finger protein 385A OS=Mus musculus OX=10090 GN=Zfp385a PE=1 SV=1;sp|Q8VD12|Z385A_MOUSE Zinc finger protein 385A OS=Mus musculus OX=10090 GN=Znf385a PE=1 SV=2	2	26	26	26	0	0	0	19	20	18	18	23	22	0	0	0	19	20	18	18	23	22	0	0	0	19	20	18	18	23	22	64	64	64	36.28	347	347;386	0	290.69	0	0	0
A0A2R8VKL5;E9Q066;G3X9Q6;Q8BWW4;A0A2R8W6Y5	A0A2R8VKL5;E9Q066;G3X9Q6;Q8BWW4;A0A2R8W6Y5	4;4;4;4;3	4;4;4;4;3	4;4;4;4;3	La-related protein 4	Larp4	tr|A0A2R8VKL5|A0A2R8VKL5_MOUSE La ribonucleoprotein 4 OS=Mus musculus OX=10090 GN=Larp4 PE=1 SV=1;tr|E9Q066|E9Q066_MOUSE La ribonucleoprotein 4 OS=Mus musculus OX=10090 GN=Larp4 PE=1 SV=1;tr|G3X9Q6|G3X9Q6_MOUSE La ribonucleoprotein 4 OS=Mus musculus OX=100	5	4	4	4	1	0	2	3	2	2	3	3	4	1	0	2	3	2	2	3	3	4	1	0	2	3	2	2	3	3	4	6.5	6.5	6.5	73.508	660	660;718;719;719;610	0	8.1199	1.2	0	2.7
A0A2R8VKP3;Q61466;A0A2R8VHB7;A0A2R8VI28;A0A2R8VI06;A0A0G2JG60;Q6P9Z1	A0A2R8VKP3;Q61466;A0A2R8VHB7;A0A2R8VI28;A0A2R8VI06;A0A0G2JG60;Q6P9Z1	6;6;3;3;3;3;3	4;4;1;1;1;1;1	4;4;1;1;1;1;1	SWI/SNF-related matrix-associated actin-dependent regulator of chromatin subfamily D member 1;SWI/SNF-related matrix-associated actin-dependent regulator of chromatin subfamily D member 3	Smarcd1;Smarcd3	tr|A0A2R8VKP3|A0A2R8VKP3_MOUSE SWI/SNF related, matrix associated, actin dependent regulator of chromatin, subfamily d, member 1 OS=Mus musculus OX=10090 GN=Smarcd1 PE=1 SV=1;sp|Q61466|SMRD1_MOUSE SWI/SNF-related matrix-associated actin-dependent regulator	7	6	4	4	0	0	0	0	0	0	2	4	4	0	0	0	0	0	0	2	3	2	0	0	0	0	0	0	2	3	2	13.9	9.9	9.9	53.585	474	474;515;95;98;175;454;483	0	4.9535	0	0	0
A0A338P6S3;A0A338P695;Q6ZPR5;A0A338P7L1;A0A338P735;A0A338P6E2;A0A338P715;A0A338P6P4;A0A338P7A7;A0A338P6I0;A0A338P6B0;A0A338P6W7;A0A338P6U9	A0A338P6S3;A0A338P695;Q6ZPR5;A0A338P7L1;A0A338P735	5;5;5;4;3;1;1;1;1;1;1;1;1	5;5;5;4;3;1;1;1;1;1;1;1;1	5;5;5;4;3;1;1;1;1;1;1;1;1	Sphingomyelin phosphodiesterase 4	Smpd4	tr|A0A338P6S3|A0A338P6S3_MOUSE Sphingomyelin phosphodiesterase 4 OS=Mus musculus OX=10090 GN=Smpd4 PE=1 SV=1;tr|A0A338P695|A0A338P695_MOUSE Sphingomyelin phosphodiesterase 4 OS=Mus musculus OX=10090 GN=Smpd4 PE=1 SV=1;sp|Q6ZPR5|NSMA3_MOUSE Sphingomyelin ph	13	5	5	5	1	1	1	3	3	2	3	3	2	1	1	1	3	3	2	3	3	2	1	1	1	3	3	2	3	3	2	8	8	8	81.799	721	721;751;823;573;499;27;50;55;82;92;110;125;128	0	23.562	2.2	2.2	2.2
Q8C601;A0A338P6D5	Q8C601;A0A338P6D5	2;2	2;2	2;2		BC049762	tr|Q8C601|Q8C601_MOUSE BC049762 protein OS=Mus musculus OX=10090 GN=BC049762 PE=1 SV=1;tr|A0A338P6D5|A0A338P6D5_MOUSE cDNA sequence BC049762 OS=Mus musculus OX=10090 GN=BC049762 PE=1 SV=1	2	2	2	2	0	0	0	1	0	0	1	2	1	0	0	0	1	0	0	1	2	1	0	0	0	1	0	0	1	2	1	33.1	33.1	33.1	18.177	163	163;219	0	8.677	0	0	0
Q3TE85;A0A338P6F6;P17095	Q3TE85;A0A338P6F6;P17095	1;1;1	1;1;1	1;1;1	High mobility group protein HMG-I/HMG-Y	Hmga1	tr|Q3TE85|Q3TE85_MOUSE High mobility group AT-hook 1 OS=Mus musculus OX=10090 GN=Hmga1 PE=1 SV=1;tr|A0A338P6F6|A0A338P6F6_MOUSE High mobility group AT-hook 1 OS=Mus musculus OX=10090 GN=Hmga1 PE=1 SV=1;sp|P17095|HMGA1_MOUSE High mobility group protein HMG-	3	1	1	1	0	0	0	0	0	0	1	0	1	0	0	0	0	0	0	1	0	1	0	0	0	0	0	0	1	0	1	23.6	23.6	23.6	11.485	106	106;118;107	0.0087163	1.5244	0	0	0
E9QPE7;A0A338P6K2;A0A2R8VHF9;O08638	E9QPE7;A0A338P6K2;A0A2R8VHF9;O08638	152;152;150;145	152;152;150;145	130;130;128;123	Myosin-11	Myh11	tr|E9QPE7|E9QPE7_MOUSE Myosin, heavy polypeptide 11, smooth muscle OS=Mus musculus OX=10090 GN=Myh11 PE=1 SV=2;tr|A0A338P6K2|A0A338P6K2_MOUSE Myosin, heavy polypeptide 11, smooth muscle OS=Mus musculus OX=10090 GN=Myh11 PE=1 SV=1;tr|A0A2R8VHF9|A0A2R8VHF9_M	4	152	152	130	124	127	126	8	5	5	8	8	6	124	127	126	8	5	5	8	8	6	109	108	112	2	1	0	0	1	0	61.7	61.7	53.5	227.12	1972	1972;1979;1938;1972	0	323.31	55	55.4	55.2
A0A338P703;A0A338P7G1;A0A338P7H5;P29699	A0A338P703;A0A338P7G1;A0A338P7H5;P29699	1;1;1;1	1;1;1;1	1;1;1;1	Alpha-2-HS-glycoprotein	Ahsg	tr|A0A338P703|A0A338P703_MOUSE Alpha-2-HS-glycoprotein OS=Mus musculus OX=10090 GN=Ahsg PE=1 SV=1;tr|A0A338P7G1|A0A338P7G1_MOUSE Alpha-2-HS-glycoprotein OS=Mus musculus OX=10090 GN=Ahsg PE=1 SV=1;tr|A0A338P7H5|A0A338P7H5_MOUSE Alpha-2-HS-glycoprotein OS=Mu	4	1	1	1	1	1	1	1	0	1	0	0	0	1	1	1	1	0	1	0	0	0	1	1	1	1	0	1	0	0	0	7.9	7.9	7.9	28.463	266	266;294;301;345	0	3.2274	7.9	7.9	7.9
A0A338P7J7;A0A338P734;Q9DA80;Q3UFY4	A0A338P7J7;A0A338P734;Q9DA80;Q3UFY4	2;2;2;2	2;2;2;2	2;2;2;2	Radial spoke head protein 3 homolog B;Radial spoke head protein 3 homolog A	Rsph3b;Rsph3a	tr|A0A338P7J7|A0A338P7J7_MOUSE Radial spoke 3A homolog (Chlamydomonas) OS=Mus musculus OX=10090 GN=Rsph3a PE=3 SV=1;tr|A0A338P734|A0A338P734_MOUSE Radial spoke 3B homolog (Chlamydomonas) OS=Mus musculus OX=10090 GN=Rsph3b PE=3 SV=1;sp|Q9DA80|RSH3B_MOUSE Ra	4	2	2	2	0	0	1	0	0	0	1	1	0	0	0	1	0	0	0	1	1	0	0	0	1	0	0	0	1	1	0	4.1	4.1	4.1	58.686	515	515;534;389;516	0.0037531	1.85	0	0	1.6
A0A338P7B7;P51807	A0A338P7B7;P51807	3;3	3;3	3;3	Dynein light chain Tctex-type 1	Dynlt1	tr|A0A338P7B7|A0A338P7B7_MOUSE Dynein light chain Tctex-type 1A OS=Mus musculus OX=10090 GN=Dynlt1a PE=1 SV=1;sp|P51807|DYLT1_MOUSE Dynein light chain Tctex-type 1 OS=Mus musculus OX=10090 GN=Dynlt1 PE=1 SV=1	2	3	3	3	1	0	0	2	2	2	2	2	2	1	0	0	2	2	2	2	2	2	1	0	0	2	2	2	2	2	2	39.3	39.3	39.3	12.242	112	112;113	0	119.73	14.3	0	0
E9PY46;A0A3B2W3F6;E9Q682	E9PY46;A0A3B2W3F6;E9Q682	10;10;9	10;10;9	10;10;9		Ift140	sp|E9PY46|IF140_MOUSE Intraflagellar transport protein 140 homolog OS=Mus musculus OX=10090 GN=Ift140 PE=1 SV=1;tr|A0A3B2W3F6|A0A3B2W3F6_MOUSE Intraflagellar transport 140 OS=Mus musculus OX=10090 GN=Ift140 PE=1 SV=1;tr|E9Q682|E9Q682_MOUSE Intraflagellar t	3	10	10	10	4	5	3	4	5	5	3	2	6	4	5	3	4	5	5	3	2	6	4	5	3	4	5	5	3	2	6	6.9	6.9	6.9	165.87	1464	1464;1421;1232	0	15.954	2.9	3.3	2.3
A0A3B2W812;Q9JLQ0	A0A3B2W812;Q9JLQ0	2;2	2;2	2;2	CD2-associated protein	Cd2ap	tr|A0A3B2W812|A0A3B2W812_MOUSE CD2-associated protein OS=Mus musculus OX=10090 GN=Cd2ap PE=1 SV=1;sp|Q9JLQ0|CD2AP_MOUSE CD2-associated protein OS=Mus musculus OX=10090 GN=Cd2ap PE=1 SV=3	2	2	2	2	0	0	0	0	0	0	2	1	1	0	0	0	0	0	0	2	1	1	0	0	0	0	0	0	2	1	1	4.3	4.3	4.3	58.393	532	532;637	0	2.8553	0	0	0
A0A3B2W837	A0A3B2W837	10	1	1			tr|A0A3B2W837|A0A3B2W837_MOUSE Vesicle-associated membrane protein, associated protein A (Fragment) OS=Mus musculus OX=10090 GN=Vapa PE=1 SV=1	1	10	1	1	4	6	7	8	8	7	8	8	8	1	1	1	1	1	1	1	1	0	1	1	1	1	1	1	1	1	0	45.3	11.9	11.9	26.102	236	236	0	34.656	28	39	45.3
A0A3F2YNM7;A0A3B2W8B4;Q80X86;A0A3B2WBB6	A0A3F2YNM7;A0A3B2W8B4;Q80X86	7;7;7;3	7;7;7;3	7;7;7;3	Armadillo repeat-containing protein 12	Armc12	tr|A0A3F2YNM7|A0A3F2YNM7_MOUSE Armadillo repeat containing 12 OS=Mus musculus OX=10090 GN=Armc12 PE=1 SV=1;tr|A0A3B2W8B4|A0A3B2W8B4_MOUSE Armadillo repeat containing 12 OS=Mus musculus OX=10090 GN=Armc12 PE=1 SV=1;sp|Q80X86|ARM12_MOUSE Armadillo repeat-con	4	7	7	7	1	1	0	0	0	0	6	4	5	1	1	0	0	0	0	6	4	5	1	1	0	0	0	0	6	4	5	24.8	24.8	24.8	37.3	330	330;366;340;112	0	11.302	2.7	2.7	0
Q9WV92;A0A5F8MPR1;D0VYV6;A7YY80;A0A3B2WBE1;A0A286YDY4;A0A3B2WD96;A0A5F8MPE1;A0A286YD84;A0A286YCY1;A0A286YCY8;A2A841;A0A286YCT6;A2A842;A2A838;A2A839;A0A571BEG4;A0A1D5RLV1;P48193;A2AD32	Q9WV92;A0A5F8MPR1;D0VYV6;A7YY80;A0A3B2WBE1;A0A286YDY4;A0A3B2WD96;A0A5F8MPE1;A0A286YD84	15;15;15;15;15;14;14;12;12;5;3;1;1;1;1;1;1;1;1;1	14;14;14;14;14;13;13;11;11;5;3;1;1;1;1;1;1;1;1;1	14;14;14;14;14;13;13;11;11;5;3;1;1;1;1;1;1;1;1;1	Band 4.1-like protein 3;Band 4.1-like protein 3, N-terminally processed	Epb41l3;Epb4.1l3	sp|Q9WV92|E41L3_MOUSE Band 4.1-like protein 3 OS=Mus musculus OX=10090 GN=Epb41l3 PE=1 SV=1;tr|A0A5F8MPR1|A0A5F8MPR1_MOUSE Erythrocyte membrane protein band 4.1 like 3 OS=Mus musculus OX=10090 GN=Epb41l3 PE=1 SV=1;tr|D0VYV6|D0VYV6_MOUSE Erythrocyte membran	20	15	14	14	3	3	0	6	6	5	9	9	8	3	3	0	6	6	5	9	8	7	3	3	0	6	6	5	9	8	7	16.8	16	16	103.34	929	929;951;911;876;819;852;812;1052;605;262;287;869;223;769;667;639;594;476;858;767	0	36.288	3.9	3.9	0
A0A3B2WBF0;P09671	A0A3B2WBF0;P09671	1;1	1;1	1;1	Superoxide dismutase [Mn], mitochondrial	Sod2	tr|A0A3B2WBF0|A0A3B2WBF0_MOUSE Superoxide dismutase OS=Mus musculus OX=10090 GN=Sod2 PE=1 SV=1;sp|P09671|SODM_MOUSE Superoxide dismutase [Mn], mitochondrial OS=Mus musculus OX=10090 GN=Sod2 PE=1 SV=3	2	1	1	1	1	0	1	1	0	0	0	0	0	1	0	1	1	0	0	0	0	0	1	0	1	1	0	0	0	0	0	7.7	7.7	7.7	19.633	182	182;222	0.00091075	2.5243	7.7	0	7.7
A0A3B2WBH9;A0A3B2WCN9;Q9Z0U1;Q921G9;Q9QXY1	A0A3B2WBH9;A0A3B2WCN9;Q9Z0U1	3;3;3;1;1	3;3;3;1;1	3;3;3;1;1	Tight junction protein ZO-2	Tjp2	tr|A0A3B2WBH9|A0A3B2WBH9_MOUSE Tight junction protein 2 OS=Mus musculus OX=10090 GN=Tjp2 PE=1 SV=1;tr|A0A3B2WCN9|A0A3B2WCN9_MOUSE Tight junction protein 2 OS=Mus musculus OX=10090 GN=Tjp2 PE=1 SV=1;sp|Q9Z0U1|ZO2_MOUSE Tight junction protein ZO-2 OS=Mus mus	5	3	3	3	0	0	0	0	0	0	2	1	2	0	0	0	0	0	0	2	1	2	0	0	0	0	0	0	2	1	2	3.1	3.1	3.1	131.1	1165	1165;1190;1167;904;905	0	4.2231	0	0	0
A0A3B2WDD2;A0A3B2WBL1;Q5XJF6;P53026;A0A3B2W824;A0A3B2W820;A0A3B2WCA5;D6RE43	A0A3B2WDD2;A0A3B2WBL1;Q5XJF6;P53026;A0A3B2W824;A0A3B2W820	8;8;8;7;5;4;1;1	8;8;8;7;5;4;1;1	8;8;8;7;5;4;1;1	Ribosomal protein;60S ribosomal protein L10a	Rpl10a	tr|A0A3B2WDD2|A0A3B2WDD2_MOUSE Ribosomal protein OS=Mus musculus OX=10090 GN=Rpl10a PE=1 SV=1;tr|A0A3B2WBL1|A0A3B2WBL1_MOUSE Ribosomal protein OS=Mus musculus OX=10090 GN=Rpl10a PE=1 SV=1;tr|Q5XJF6|Q5XJF6_MOUSE Ribosomal protein OS=Mus musculus OX=10090 GN	8	8	8	8	6	6	5	3	3	4	2	3	2	6	6	5	3	3	4	2	3	2	6	6	5	3	3	4	2	3	2	44.2	44.2	44.2	21.636	190	190;216;217;217;164;118;54;58	0	31.058	40	35.8	31.1
A0A3B2WBM3;P62869	A0A3B2WBM3;P62869	2;2	2;2	2;2	Transcription elongation factor B polypeptide 2	Tceb2	tr|A0A3B2WBM3|A0A3B2WBM3_MOUSE Elongin B OS=Mus musculus OX=10090 GN=Elob PE=1 SV=1;sp|P62869|ELOB_MOUSE Elongin-B OS=Mus musculus OX=10090 GN=Elob PE=1 SV=1	2	2	2	2	0	0	0	0	1	0	1	1	1	0	0	0	0	1	0	1	1	1	0	0	0	0	1	0	1	1	1	35.6	35.6	35.6	10.109	90	90;118	0	6.5364	0	0	0
Q3U0V1;A0A3B2WCD8;A0A3B2W465	Q3U0V1;A0A3B2WCD8	38;38;9	38;38;9	33;33;7	Far upstream element-binding protein 2	Khsrp	sp|Q3U0V1|FUBP2_MOUSE Far upstream element-binding protein 2 OS=Mus musculus OX=10090 GN=Khsrp PE=1 SV=2;tr|A0A3B2WCD8|A0A3B2WCD8_MOUSE KH-type splicing regulatory protein OS=Mus musculus OX=10090 GN=Khsrp PE=1 SV=1	3	38	38	33	2	2	3	33	32	36	33	33	32	2	2	3	33	32	36	33	33	32	2	2	3	28	27	31	29	28	28	52.5	52.5	48.9	76.775	748	748;721;238	0	323.31	3.2	2.8	4.5
A0A3Q4EHK6;A0A3Q4EGA1;Q9D513	A0A3Q4EHK6;A0A3Q4EGA1;Q9D513	1;1;1	1;1;1	1;1;1	Meiosis-specific with OB domain-containing protein	Meiob	tr|A0A3Q4EHK6|A0A3Q4EHK6_MOUSE Meiosis specific with OB domains OS=Mus musculus OX=10090 GN=Meiob PE=4 SV=1;tr|A0A3Q4EGA1|A0A3Q4EGA1_MOUSE Meiosis specific with OB domains OS=Mus musculus OX=10090 GN=Meiob PE=4 SV=1;sp|Q9D513|MEIOB_MOUSE Meiosis-specific w	3	1	1	1	0	0	0	0	0	0	0	1	1	0	0	0	0	0	0	0	1	1	0	0	0	0	0	0	0	1	1	2.6	2.6	2.6	39.164	344	344;426;470	0.004896	1.7399	0	0	0
A0A3Q4EGK1	A0A3Q4EGK1	16	16	16			tr|A0A3Q4EGK1|A0A3Q4EGK1_MOUSE Predicted gene, 50092 OS=Mus musculus OX=10090 GN=Gm50092 PE=4 SV=1	1	16	16	16	0	0	0	6	6	6	12	13	13	0	0	0	6	6	6	12	13	13	0	0	0	6	6	6	12	13	13	26.4	26.4	26.4	63.186	575	575	0	74.926	0	0	0
A0A3Q4EGN8;Q9D424	A0A3Q4EGN8;Q9D424	3;3	3;3	3;3	Calcium-binding tyrosine phosphorylation-regulated protein	Cabyr	tr|A0A3Q4EGN8|A0A3Q4EGN8_MOUSE Calcium-binding tyrosine-(Y)-phosphorylation regulated (fibrousheathin 2) OS=Mus musculus OX=10090 GN=Cabyr PE=1 SV=1;sp|Q9D424|CABYR_MOUSE Calcium-binding tyrosine phosphorylation-regulated protein OS=Mus musculus OX=10090 G	2	3	3	3	1	0	0	3	1	2	1	1	0	1	0	0	3	1	2	1	1	0	1	0	0	3	1	2	1	1	0	20.9	20.9	20.9	20.498	187	187;453	0	7.9342	9.1	0	0
A0A3Q4EH04;A0A3Q4L335;A0A3Q4L393;Q8BL97;A0A3Q4EGP0	A0A3Q4EH04;A0A3Q4L335;A0A3Q4L393;Q8BL97	13;13;13;13;5	12;12;12;12;5	12;12;12;12;5	Serine/arginine-rich splicing factor 7	Srsf7	tr|A0A3Q4EH04|A0A3Q4EH04_MOUSE Serine and arginine-rich splicing factor 7 OS=Mus musculus OX=10090 GN=Srsf7 PE=1 SV=1;tr|A0A3Q4L335|A0A3Q4L335_MOUSE Serine and arginine-rich splicing factor 7 OS=Mus musculus OX=10090 GN=Srsf7 PE=1 SV=1;tr|A0A3Q4L393|A0A3Q4	5	13	12	12	0	0	0	7	12	11	12	13	11	0	0	0	6	11	10	11	12	10	0	0	0	6	11	10	11	12	10	74.5	74.5	74.5	15.763	137	137;215;235;267;154	0	61.876	0	0	0
Q149S1;A0A3Q4EH78;A0A3Q4EGQ7	Q149S1;A0A3Q4EH78;A0A3Q4EGQ7	5;5;4	5;5;4	5;5;4	Tektin-4	Tekt4	sp|Q149S1|TEKT4_MOUSE Tektin-4 OS=Mus musculus OX=10090 GN=Tekt4 PE=1 SV=2;tr|A0A3Q4EH78|A0A3Q4EH78_MOUSE Tektin OS=Mus musculus OX=10090 GN=Tekt4 PE=1 SV=1;tr|A0A3Q4EGQ7|A0A3Q4EGQ7_MOUSE Tektin OS=Mus musculus OX=10090 GN=Tekt4 PE=1 SV=1	3	5	5	5	1	2	1	2	3	2	3	5	2	1	2	1	2	3	2	3	5	2	1	2	1	2	3	2	3	5	2	12.1	12.1	12.1	52.045	447	447;442;383	0	8.1385	2.2	4	2.2
A0A3Q4EH93;A0A3Q4L2S1;Q9R061	A0A3Q4EH93;A0A3Q4L2S1;Q9R061	2;2;2	2;2;2	2;2;2	Cytosolic Fe-S cluster assembly factor NUBP2	Nubp2	tr|A0A3Q4EH93|A0A3Q4EH93_MOUSE Nucleotide binding protein 2 OS=Mus musculus OX=10090 GN=Nubp2 PE=1 SV=1;tr|A0A3Q4L2S1|A0A3Q4L2S1_MOUSE Nucleotide binding protein 2 OS=Mus musculus OX=10090 GN=Nubp2 PE=1 SV=1;sp|Q9R061|NUBP2_MOUSE Cytosolic Fe-S cluster ass	3	2	2	2	2	1	1	0	0	0	0	0	0	2	1	1	0	0	0	0	0	0	2	1	1	0	0	0	0	0	0	14.7	14.7	14.7	23.025	211	211;251;275	0.0048642	1.7091	14.7	8.5	8.5
A0A3Q4EHJ0;P0DP28;P0DP27;P0DP26	A0A3Q4EHJ0;P0DP28;P0DP27;P0DP26	1;1;1;1	1;1;1;1	1;1;1;1			tr|A0A3Q4EHJ0|A0A3Q4EHJ0_MOUSE Calmodulin 1 OS=Mus musculus OX=10090 GN=Calm2 PE=1 SV=1;sp|P0DP28|CALM3_MOUSE Calmodulin-3 OS=Mus musculus OX=10090 GN=Calm3 PE=1 SV=1;sp|P0DP27|CALM2_MOUSE Calmodulin-2 OS=Mus musculus OX=10090 GN=Calm2 PE=1 SV=1;sp|P0DP26|	4	1	1	1	1	1	1	0	0	0	0	0	0	1	1	1	0	0	0	0	0	0	1	1	1	0	0	0	0	0	0	14.2	14.2	14.2	12.876	113	113;149;149;149	0.008744	1.5519	14.2	14.2	14.2
A0A3Q4L2X3	A0A3Q4L2X3	4	1	1			tr|A0A3Q4L2X3|A0A3Q4L2X3_MOUSE Heterogeneous nuclear ribonucleoprotein M (Fragment) OS=Mus musculus OX=10090 GN=Hnrnpm PE=1 SV=1	1	4	1	1	1	1	2	2	2	4	3	3	3	0	0	0	0	0	1	0	0	0	0	0	0	0	0	1	0	0	0	31.7	17.9	17.9	13.207	123	123	0	12.357	6.5	6.5	13.8
A0A494B9R9;A0A494B9Z5;A0A494B8X5;Q3V3N7	A0A494B9R9;A0A494B9Z5;A0A494B8X5;Q3V3N7	1;1;1;1	1;1;1;1	1;1;1;1		Bbs1	tr|A0A494B9R9|A0A494B9R9_MOUSE Bardet-Biedl syndrome 1 (human) OS=Mus musculus OX=10090 GN=Bbs1 PE=1 SV=1;tr|A0A494B9Z5|A0A494B9Z5_MOUSE Bardet-Biedl syndrome 1 (human) OS=Mus musculus OX=10090 GN=Bbs1 PE=1 SV=1;tr|A0A494B8X5|A0A494B8X5_MOUSE Bardet-Biedl	4	1	1	1	0	0	0	0	0	1	0	1	1	0	0	0	0	0	1	0	1	1	0	0	0	0	0	1	0	1	1	9.8	9.8	9.8	17.495	164	164;452;496;593	0	3.9295	0	0	0
A0A494BAS6;A0A494B909;Q9WV68;A0A494B8Z4;A0A494BB28	A0A494BAS6;A0A494B909;Q9WV68;A0A494B8Z4	5;5;5;4;2	5;5;5;4;2	5;5;5;4;2	Peroxisomal 2,4-dienoyl-CoA reductase	Decr2	tr|A0A494BAS6|A0A494BAS6_MOUSE Peroxisomal 2,4-dienoyl-CoA reductase [(3E)-enoyl-CoA-producing] OS=Mus musculus OX=10090 GN=Decr2 PE=1 SV=1;tr|A0A494B909|A0A494B909_MOUSE Peroxisomal 2,4-dienoyl-CoA reductase [(3E)-enoyl-CoA-producing] OS=Mus musculus OX=1	5	5	5	5	0	0	0	5	3	2	2	2	2	0	0	0	5	3	2	2	2	2	0	0	0	5	3	2	2	2	2	17.5	17.5	17.5	28.805	268	268;351;292;232;257	0	11.754	0	0	0
A0A494B929;F8WHS8;G3UWE3;Q8C5D8	A0A494B929;F8WHS8;G3UWE3;Q8C5D8	1;1;1;1	1;1;1;1	1;1;1;1	E3 SUMO-protein ligase PIAS2	Pias2	tr|A0A494B929|A0A494B929_MOUSE Protein inhibitor of activated STAT 2 OS=Mus musculus OX=10090 GN=Pias2 PE=1 SV=1;tr|F8WHS8|F8WHS8_MOUSE Protein inhibitor of activated STAT 2 OS=Mus musculus OX=10090 GN=Pias2 PE=1 SV=1;tr|G3UWE3|G3UWE3_MOUSE Protein inhibit	4	1	1	1	0	0	0	0	0	0	1	0	1	0	0	0	0	0	0	1	0	1	0	0	0	0	0	0	1	0	1	4.8	4.8	4.8	28.187	252	252;565;614;621	0.0009095	2.5195	0	0	0
A0A494B9D7;Q8VE10	A0A494B9D7;Q8VE10	2;2	2;2	2;2	N-alpha-acetyltransferase 40	Naa40	tr|A0A494B9D7|A0A494B9D7_MOUSE N-alpha-acetyltransferase 40 OS=Mus musculus OX=10090 GN=Naa40 PE=1 SV=1;sp|Q8VE10|NAA40_MOUSE N-alpha-acetyltransferase 40 OS=Mus musculus OX=10090 GN=Naa40 PE=1 SV=1	2	2	2	2	1	1	1	1	1	1	1	1	2	1	1	1	1	1	1	1	1	2	1	1	1	1	1	1	1	1	2	15.2	15.2	15.2	22.321	191	191;237	0	8.3557	6.3	6.3	6.3
Q8VIG3;A0A494B9F6;Q3YEA0	Q8VIG3;A0A494B9F6;Q3YEA0	6;6;5	6;6;5	6;6;5	Radial spoke head 1 homolog	Rsph1	sp|Q8VIG3|RSPH1_MOUSE Radial spoke head 1 homolog OS=Mus musculus OX=10090 GN=Rsph1 PE=1 SV=2;tr|A0A494B9F6|A0A494B9F6_MOUSE Radial spoke head 1 homolog (Chlamydomonas) OS=Mus musculus OX=10090 GN=Rsph1 PE=1 SV=1;tr|Q3YEA0|Q3YEA0_MOUSE Radial spoke head 1	3	6	6	6	4	4	4	2	2	4	0	0	0	4	4	4	2	2	4	0	0	0	4	4	4	2	2	4	0	0	0	29.9	29.9	29.9	34.181	301	301;284;263	0	34.863	18.9	18.9	18.3
Q9EPK6;A0A494B9H1;A0A494B9B2	Q9EPK6;A0A494B9H1;A0A494B9B2	2;2;1	2;2;1	2;2;1	Nucleotide exchange factor SIL1	Sil1	sp|Q9EPK6|SIL1_MOUSE Nucleotide exchange factor SIL1 OS=Mus musculus OX=10090 GN=Sil1 PE=1 SV=2;tr|A0A494B9H1|A0A494B9H1_MOUSE SIL1 nucleotide exchange factor OS=Mus musculus OX=10090 GN=Sil1 PE=1 SV=1;tr|A0A494B9B2|A0A494B9B2_MOUSE SIL1 nucleotide exchang	3	2	2	2	1	1	2	0	0	0	0	0	0	1	1	2	0	0	0	0	0	0	1	1	2	0	0	0	0	0	0	4.7	4.7	4.7	52.429	465	465;417;327	0.0072347	1.645	2.2	2.6	4.7
A0A494BAR0;A0A494BBE6;A0A494B9I3;Q9Z1B8	A0A494BAR0;A0A494BBE6;A0A494B9I3;Q9Z1B8	1;1;1;1	1;1;1;1	1;1;1;1	PHD finger protein 1	Phf1	tr|A0A494BAR0|A0A494BAR0_MOUSE PHD finger protein 1 OS=Mus musculus OX=10090 GN=Phf1 PE=1 SV=1;tr|A0A494BBE6|A0A494BBE6_MOUSE PHD finger protein 1 OS=Mus musculus OX=10090 GN=Phf1 PE=1 SV=1;tr|A0A494B9I3|A0A494B9I3_MOUSE PHD finger protein 1 OS=Mus musculu	4	1	1	1	0	0	0	0	0	0	1	1	1	0	0	0	0	0	0	1	1	1	0	0	0	0	0	0	1	1	1	29.2	29.2	29.2	7.7659	72	72;558;599;559	0	4.8772	0	0	0
A0A494B9L0;Q5RL57;Q9R0L7;A0A494BBL1;A0A494BAE8;A0A494BAS2	A0A494B9L0;Q5RL57;Q9R0L7;A0A494BBL1	5;5;5;4;1;1	5;5;5;4;1;1	5;5;5;4;1;1	A-kinase anchor protein 8-like	Akap8l	tr|A0A494B9L0|A0A494B9L0_MOUSE A kinase (PRKA) anchor protein 8-like OS=Mus musculus OX=10090 GN=Akap8l PE=1 SV=1;tr|Q5RL57|Q5RL57_MOUSE A kinase (PRKA) anchor protein 8-like OS=Mus musculus OX=10090 GN=Akap8l PE=1 SV=1;sp|Q9R0L7|AKP8L_MOUSE A-kinase ancho	6	5	5	5	0	0	1	3	1	3	4	4	4	0	0	1	3	1	3	4	4	4	0	0	1	3	1	3	4	4	4	8.9	8.9	8.9	67.884	607	607;641;642;262;148;181	0	9.9997	0	0	2.1
A0A494B9L7;A0A494B9Y0;Q9D5T0;A0A494BAB5	A0A494B9L7;A0A494B9Y0;Q9D5T0;A0A494BAB5	3;3;3;2	3;3;3;2	3;3;3;2	ATPase family AAA domain-containing protein 1	Atad1	tr|A0A494B9L7|A0A494B9L7_MOUSE ATPase family, AAA domain containing 1 OS=Mus musculus OX=10090 GN=Atad1 PE=1 SV=1;tr|A0A494B9Y0|A0A494B9Y0_MOUSE ATPase family, AAA domain containing 1 OS=Mus musculus OX=10090 GN=Atad1 PE=1 SV=1;sp|Q9D5T0|ATAD1_MOUSE Outer	4	3	3	3	0	0	0	3	1	1	2	2	1	0	0	0	3	1	1	2	2	1	0	0	0	3	1	1	2	2	1	10.9	10.9	10.9	34.021	303	303;322;361;276	0	3.855	0	0	0
A0A494B9M2;A0A494BAI4;A0A494BAJ0;D3YTQ4;O70628	A0A494B9M2;A0A494BAI4;A0A494BAJ0;D3YTQ4;O70628	1;1;1;1;1	1;1;1;1;1	1;1;1;1;1	High affinity cGMP-specific 3,5-cyclic phosphodiesterase 9A	Pde9a	tr|A0A494B9M2|A0A494B9M2_MOUSE Phosphodiesterase 9A (Fragment) OS=Mus musculus OX=10090 GN=Pde9a PE=4 SV=1;tr|A0A494BAI4|A0A494BAI4_MOUSE Phosphodiesterase 9A OS=Mus musculus OX=10090 GN=Pde9a PE=1 SV=1;tr|A0A494BAJ0|A0A494BAJ0_MOUSE Phosphodiesterase (Fra	5	1	1	1	0	0	0	0	0	1	0	0	0	0	0	0	0	0	1	0	0	0	0	0	0	0	0	1	0	0	0	30	30	30	3.3639	30	30;452;495;508;534	1	-2	0	0	0
A0A494B9Z0;A0A494BBA8;P62862	A0A494B9Z0;A0A494BBA8;P62862	3;3;3	3;3;3	3;3;3	40S ribosomal protein S30	Fau	tr|A0A494B9Z0|A0A494B9Z0_MOUSE 40S ribosomal protein S30 OS=Mus musculus OX=10090 GN=Fau PE=1 SV=1;tr|A0A494BBA8|A0A494BBA8_MOUSE Finkel-Biskis-Reilly murine sarcoma virus (FBR-MuSV) ubiquitously expressed (fox derived) OS=Mus musculus OX=10090 GN=Fau PE=1	3	3	3	3	3	3	3	3	3	3	3	3	3	3	3	3	3	3	3	3	3	3	3	3	3	3	3	3	3	3	3	19	19	19	7.0062	63	63;98;133	0	9.7087	19	19	19
A0A494BA05;Q61823	A0A494BA05;Q61823	1;1	1;1	1;1	Programmed cell death protein 4	Pdcd4	tr|A0A494BA05|A0A494BA05_MOUSE Programmed cell death protein 4 OS=Mus musculus OX=10090 GN=Pdcd4 PE=1 SV=1;sp|Q61823|PDCD4_MOUSE Programmed cell death protein 4 OS=Mus musculus OX=10090 GN=Pdcd4 PE=1 SV=1	2	1	1	1	1	1	1	0	1	0	1	0	0	1	1	1	0	1	0	1	0	0	1	1	1	0	1	0	1	0	0	3.4	3.4	3.4	35.354	319	319;469	0	2.9063	3.4	3.4	3.4
A0A494BAD3;P97742	A0A494BAD3;P97742	2;2	2;2	2;2	Carnitine O-palmitoyltransferase 1, liver isoform	Cpt1a	tr|A0A494BAD3|A0A494BAD3_MOUSE carnitine O-palmitoyltransferase (Fragment) OS=Mus musculus OX=10090 GN=Cpt1a PE=1 SV=1;sp|P97742|CPT1A_MOUSE Carnitine O-palmitoyltransferase 1, liver isoform OS=Mus musculus OX=10090 GN=Cpt1a PE=1 SV=4	2	2	2	2	0	2	0	0	0	1	0	0	0	0	2	0	0	0	1	0	0	0	0	2	0	0	0	1	0	0	0	6.2	6.2	6.2	46.147	401	401;773	0	3.0216	0	6.2	0
A0A494BAJ6;Q9WUL7	A0A494BAJ6;Q9WUL7	2;2	2;2	2;2	ADP-ribosylation factor-like protein 3	Arl3	tr|A0A494BAJ6|A0A494BAJ6_MOUSE ADP-ribosylation factor-like 3 OS=Mus musculus OX=10090 GN=Arl3 PE=1 SV=1;sp|Q9WUL7|ARL3_MOUSE ADP-ribosylation factor-like protein 3 OS=Mus musculus OX=10090 GN=Arl3 PE=1 SV=1	2	2	2	2	1	2	1	1	1	1	1	1	1	1	2	1	1	1	1	1	1	1	1	2	1	1	1	1	1	1	1	16.7	16.7	16.7	20.227	180	180;182	0	5.2106	6.1	16.7	6.1
A0A494BAM2;Q9JJT0	A0A494BAM2;Q9JJT0	1;1	1;1	1;1	RNA 3-terminal phosphate cyclase-like protein	Rcl1	tr|A0A494BAM2|A0A494BAM2_MOUSE RNA terminal phosphate cyclase-like 1 OS=Mus musculus OX=10090 GN=Rcl1 PE=1 SV=1;sp|Q9JJT0|RCL1_MOUSE RNA 3-terminal phosphate cyclase-like protein OS=Mus musculus OX=10090 GN=Rcl1 PE=2 SV=1	2	1	1	1	0	0	0	0	0	0	0	0	1	0	0	0	0	0	0	0	0	1	0	0	0	0	0	0	0	0	1	4.7	4.7	4.7	36.747	337	337;373	0	7.5189	0	0	0
A0A494BAY0;A0A494BAR3;Q8R105	A0A494BAY0;A0A494BAR3;Q8R105	1;1;1	1;1;1	1;1;1	Vacuolar protein sorting-associated protein 37C	Vps37c	tr|A0A494BAY0|A0A494BAY0_MOUSE Vacuolar protein sorting 37C (Fragment) OS=Mus musculus OX=10090 GN=Vps37c PE=1 SV=1;tr|A0A494BAR3|A0A494BAR3_MOUSE Vacuolar protein sorting 37C OS=Mus musculus OX=10090 GN=Vps37c PE=1 SV=1;sp|Q8R105|VP37C_MOUSE Vacuolar prot	3	1	1	1	0	0	0	0	0	0	1	0	1	0	0	0	0	0	0	1	0	1	0	0	0	0	0	0	1	0	1	16.3	16.3	16.3	11.914	104	104;163;352	0	15.086	0	0	0
A0A494BAX5;A0A498WGK2;Q8BP47;A0A494B927;A0A494BB89;A0A494BAW6	A0A494BAX5;A0A498WGK2;Q8BP47	5;5;5;2;2;1	5;5;5;2;2;1	5;5;5;2;2;1	Asparagine--tRNA ligase, cytoplasmic	Nars	tr|A0A494BAX5|A0A494BAX5_MOUSE asparagine--tRNA ligase (Fragment) OS=Mus musculus OX=10090 GN=Nars1 PE=1 SV=1;tr|A0A498WGK2|A0A498WGK2_MOUSE asparagine--tRNA ligase OS=Mus musculus OX=10090 GN=Nars1 PE=1 SV=1;sp|Q8BP47|SYNC_MOUSE Asparagine--tRNA ligase, c	6	5	5	5	0	0	0	0	0	0	4	5	4	0	0	0	0	0	0	4	5	4	0	0	0	0	0	0	4	5	4	8	8	8	57.222	497	497;558;559;210;517;164	0	15.244	0	0	0
A0A494BAY2;Q8K2Q2;A0A494BB82;A0A494BBG0;A0A494B9X6;A0A494BAB1;O09131	A0A494BAY2;Q8K2Q2;A0A494BB82	5;5;4;1;1;1;1	5;5;4;1;1;1;1	5;5;4;1;1;1;1	Glutathione S-transferase omega-2	Gsto2	tr|A0A494BAY2|A0A494BAY2_MOUSE Glutathione S-transferase omega OS=Mus musculus OX=10090 GN=Gsto2 PE=1 SV=1;sp|Q8K2Q2|GSTO2_MOUSE Glutathione S-transferase omega-2 OS=Mus musculus OX=10090 GN=Gsto2 PE=1 SV=1;tr|A0A494BB82|A0A494BB82_MOUSE Glutathione S-tran	7	5	5	5	0	0	0	0	1	1	2	4	4	0	0	0	0	1	1	2	4	4	0	0	0	0	1	1	2	4	4	26.6	26.6	26.6	22.246	192	192;248;214;64;108;166;240	0	5.2011	0	0	0
A0A494BB95;Q8BMJ3;Q60872;Q8BX20;Q3UTA4;Q3UT53;Q3TQZ4;J3QQ02;J3QPI8;J3QP87;J3QNT6;J3QMW5;A0A1Y7VNG9;A0A1Y7VLT7;A0A1Y7VK80;A0A1Y7VJE9	A0A494BB95;Q8BMJ3;Q60872;Q8BX20;Q3UTA4;Q3UT53;Q3TQZ4;J3QQ02;J3QPI8;J3QP87;J3QNT6;J3QMW5;A0A1Y7VNG9;A0A1Y7VLT7;A0A1Y7VK80;A0A1Y7VJE9	2;2;2;1;1;1;1;1;1;1;1;1;1;1;1;1	2;2;2;1;1;1;1;1;1;1;1;1;1;1;1;1	2;2;2;1;1;1;1;1;1;1;1;1;1;1;1;1	Eukaryotic translation initiation factor 1A, X-chromosomal;Eukaryotic translation initiation factor 1A	Eif1ax;Eif1a;Gm5662;Gm8300;Gm4027;Gm2016;Gm2056;Gm6803;Gm2035;Gm5039;Gm2075	tr|A0A494BB95|A0A494BB95_MOUSE Eukaryotic translation initiation factor 4C OS=Mus musculus OX=10090 GN=Eif1a PE=1 SV=1;sp|Q8BMJ3|IF1AX_MOUSE Eukaryotic translation initiation factor 1A, X-chromosomal OS=Mus musculus OX=10090 GN=Eif1ax PE=2 SV=3;sp|Q60872|I	16	2	2	2	0	1	0	0	0	0	1	2	1	0	1	0	0	0	0	1	2	1	0	1	0	0	0	0	1	2	1	10.2	10.2	10.2	28.612	254	254;144;144;144;144;144;144;144;144;144;144;144;144;144;144;144	0	4.7949	0	3.9	0
A0A494BBF6;A0A494BBI6;Q9WUD1	A0A494BBF6;A0A494BBI6;Q9WUD1	2;2;2	2;2;2	2;2;2	STIP1 homology and U box-containing protein 1	Stub1	tr|A0A494BBF6|A0A494BBF6_MOUSE STIP1 homology and U-Box containing protein 1 OS=Mus musculus OX=10090 GN=Stub1 PE=1 SV=1;tr|A0A494BBI6|A0A494BBI6_MOUSE STIP1 homology and U-Box containing protein 1 OS=Mus musculus OX=10090 GN=Stub1 PE=1 SV=1;sp|Q9WUD1|CHIP	3	2	2	2	1	1	0	0	0	0	1	0	1	1	1	0	0	0	0	1	0	1	1	1	0	0	0	0	1	0	1	8.6	8.6	8.6	31.161	268	268;277;304	0	2.7277	4.5	4.1	0
A0A494BBG8;S4R1I3;Q3UE92;Q6P1B1	A0A494BBG8;S4R1I3;Q3UE92;Q6P1B1	3;3;3;3	3;3;3;3	3;3;3;3	Xaa-Pro aminopeptidase 1	Xpnpep1	tr|A0A494BBG8|A0A494BBG8_MOUSE X-prolyl aminopeptidase (aminopeptidase P) 1, soluble OS=Mus musculus OX=10090 GN=Xpnpep1 PE=1 SV=1;tr|S4R1I3|S4R1I3_MOUSE X-prolyl aminopeptidase (aminopeptidase P) 1, soluble OS=Mus musculus OX=10090 GN=Xpnpep1 PE=1 SV=1;tr	4	3	3	3	1	1	1	2	2	2	0	0	0	1	1	1	2	2	2	0	0	0	1	1	1	2	2	2	0	0	0	6.6	6.6	6.6	65.186	587	587;635;666;623	0	4.3598	2.7	2.7	2.7
A0A498WFS2;Q922Y1	A0A498WFS2;Q922Y1	2;2	2;2	2;2	UBX domain-containing protein 1	Ubxn1	tr|A0A498WFS2|A0A498WFS2_MOUSE UBX domain protein 1 OS=Mus musculus OX=10090 GN=Ubxn1 PE=1 SV=1;sp|Q922Y1|UBXN1_MOUSE UBX domain-containing protein 1 OS=Mus musculus OX=10090 GN=Ubxn1 PE=1 SV=1	2	2	2	2	2	0	2	1	0	0	1	1	1	2	0	2	1	0	0	1	1	1	2	0	2	1	0	0	1	1	1	7.6	7.6	7.6	29.93	262	262;297	0.00089087	2.3888	7.6	0	7.6
A0A571BG20;B1AQX6;B1AQX7;A0A571BDG6;B1AQX9;A0A571BDG0;A0A571BG39;Q9QWI6;B1AQX8	A0A571BG20;B1AQX6;B1AQX7;A0A571BDG6;B1AQX9;A0A571BDG0;A0A571BG39;Q9QWI6;B1AQX8	2;2;2;2;2;2;2;2;1	2;2;2;2;2;2;2;2;1	2;2;2;2;2;2;2;2;1	SRC kinase signaling inhibitor 1	Srcin1	tr|A0A571BG20|A0A571BG20_MOUSE SRC kinase signaling inhibitor 1 OS=Mus musculus OX=10090 GN=Srcin1 PE=1 SV=1;tr|B1AQX6|B1AQX6_MOUSE SRC kinase signaling inhibitor 1 OS=Mus musculus OX=10090 GN=Srcin1 PE=1 SV=1;tr|B1AQX7|B1AQX7_MOUSE SRC kinase signaling in	9	2	2	2	0	1	1	1	2	1	0	1	0	0	1	1	1	2	1	0	1	0	0	1	1	1	2	1	0	1	0	3.3	3.3	3.3	112.81	1055	1055;1174;1198;1205;1217;1225;1357;1250;473	0	4.1747	0	1.4	1.4
B1AWN8;A0A571BEE2	B1AWN8;A0A571BEE2	2;2	2;2	2;2		Cylc2	tr|B1AWN8|B1AWN8_MOUSE Cylicin, basic protein of sperm head cytoskeleton 2 OS=Mus musculus OX=10090 GN=Cylc2 PE=1 SV=2;tr|A0A571BEE2|A0A571BEE2_MOUSE Cylicin, basic protein of sperm head cytoskeleton 2 OS=Mus musculus OX=10090 GN=Cylc2 PE=1 SV=1	2	2	2	2	1	0	0	0	1	0	2	2	2	1	0	0	0	1	0	2	2	2	1	0	0	0	1	0	2	2	2	7.1	7.1	7.1	46.653	422	422;665	0	4.0198	2.8	0	0
A0A571BEI2;Q6PIU9	A0A571BEI2;Q6PIU9	2;2	2;2	2;2	Uncharacterized protein FLJ45252 homolog		tr|A0A571BEI2|A0A571BEI2_MOUSE AP2 associated kinase 1 (Fragment) OS=Mus musculus OX=10090 GN=Aak1 PE=1 SV=1;sp|Q6PIU9|YJ005_MOUSE Uncharacterized protein FLJ45252 homolog OS=Mus musculus OX=10090 PE=1 SV=2	2	2	2	2	0	0	0	0	0	0	2	1	1	0	0	0	0	0	0	2	1	1	0	0	0	0	0	0	2	1	1	6.9	6.9	6.9	53.987	510	510;354	0	8.5859	0	0	0
E0CXZ9;Q3UPV6;A0A571BGH0;A0A571BF54;A0A571BEM7;P62482	E0CXZ9;Q3UPV6;A0A571BGH0;A0A571BF54;A0A571BEM7;P62482	1;1;1;1;1;1	1;1;1;1;1;1	1;1;1;1;1;1	Voltage-gated potassium channel subunit beta-2	Kcnab2	tr|E0CXZ9|E0CXZ9_MOUSE Voltage-gated potassium channel subunit beta-1 OS=Mus musculus OX=10090 GN=Kcnab2 PE=1 SV=2;tr|Q3UPV6|Q3UPV6_MOUSE Voltage-gated potassium channel subunit beta-2 OS=Mus musculus OX=10090 GN=Kcnab2 PE=1 SV=1;tr|A0A571BGH0|A0A571BGH0_M	6	1	1	1	0	0	0	1	1	1	0	0	0	0	0	0	1	1	1	0	0	0	0	0	0	1	1	1	0	0	0	6.7	6.7	6.7	33.678	300	300;353;382;398;415;367	0	4.1492	0	0	0
A0A5F8MPA4	A0A5F8MPA4	1	1	1			tr|A0A5F8MPA4|A0A5F8MPA4_MOUSE Voltage-gated potassium channel subunit beta-1 OS=Mus musculus OX=10090 GN=Kcnab1 PE=1 SV=1	1	1	1	1	0	1	1	0	0	0	0	0	0	0	1	1	0	0	0	0	0	0	0	1	1	0	0	0	0	0	0	2.9	2.9	2.9	45.566	408	408	1	-2	0	2.9	2.9
P14152;A0A5F8MPN8;B1ATQ3	P14152;A0A5F8MPN8;B1ATQ3	2;2;1	2;2;1	2;2;1	Malate dehydrogenase, cytoplasmic	Mdh1	sp|P14152|MDHC_MOUSE Malate dehydrogenase, cytoplasmic OS=Mus musculus OX=10090 GN=Mdh1 PE=1 SV=3;tr|A0A5F8MPN8|A0A5F8MPN8_MOUSE Malate dehydrogenase OS=Mus musculus OX=10090 GN=Mdh1 PE=1 SV=1;tr|B1ATQ3|B1ATQ3_MOUSE Malate dehydrogenase, cytoplasmic (Fragm	3	2	2	2	2	2	0	0	1	1	0	0	0	2	2	0	0	1	1	0	0	0	2	2	0	0	1	1	0	0	0	8.7	8.7	8.7	36.511	334	334;355;155	0	4.3309	8.7	8.7	0
Q5PR69;A0A5F8MPP1;F7BFN2	Q5PR69;A0A5F8MPP1	9;9;1	9;9;1	9;9;1	Uncharacterized protein KIAA1211	Kiaa1211	sp|Q5PR69|CRACD_MOUSE Capping protein-inhibiting regulator of actin dynamics OS=Mus musculus OX=10090 GN=Cracd PE=1 SV=4;tr|A0A5F8MPP1|A0A5F8MPP1_MOUSE Capping protein inhibiting regulator of actin OS=Mus musculus OX=10090 GN=Cracd PE=1 SV=1	3	9	9	9	1	0	0	1	3	2	5	7	8	1	0	0	1	3	2	5	7	8	1	0	0	1	3	2	5	7	8	9.5	9.5	9.5	142.88	1291	1291;1376;95	0	21.102	1.2	0	0
D3YUW7;E9QMC1;A0A5F8MPT6;P59242;A0A0G2JFG0;A0A0G2JEK8	D3YUW7;E9QMC1;A0A5F8MPT6;P59242	20;20;20;20;9;9	20;20;20;20;9;9	20;20;20;20;9;9	Cingulin	Cgn	tr|D3YUW7|D3YUW7_MOUSE Cingulin OS=Mus musculus OX=10090 GN=Cgn PE=1 SV=2;tr|E9QMC1|E9QMC1_MOUSE Cingulin OS=Mus musculus OX=10090 GN=Cgn PE=1 SV=2;tr|A0A5F8MPT6|A0A5F8MPT6_MOUSE Cingulin OS=Mus musculus OX=10090 GN=Cgn PE=1 SV=1;sp|P59242|CING_MOUSE Cingu	6	20	20	20	13	11	11	8	6	6	12	10	9	13	11	11	8	6	6	12	10	9	13	11	11	8	6	6	12	10	9	21.2	21.2	21.2	135.61	1183	1183;1191;1192;1191;403;448	0	111.12	14.6	11.9	12.7
A0A5F8MPU3;A0A571BEL2	A0A5F8MPU3	3;1	3;1	3;1			sp|A0A5F8MPU3|CTSRT_MOUSE Cation channel sperm-associated targeting subunit tau OS=Mus musculus OX=10090 GN=C2cd6 PE=1 SV=1	2	3	3	3	0	0	0	1	1	2	0	2	2	0	0	0	1	1	2	0	2	2	0	0	0	1	1	2	0	2	2	1.3	1.3	1.3	257.62	2282	2282;724	0	3.8487	0	0	0
A0A5F8MPY3;P34152;A0A2I3BQ85;E9Q2A6;Q3UDE9;Q9QVP9	A0A5F8MPY3;P34152	8;8;1;1;1;1	8;8;1;1;1;1	8;8;1;1;1;1	Focal adhesion kinase 1	Ptk2	tr|A0A5F8MPY3|A0A5F8MPY3_MOUSE non-specific protein-tyrosine kinase OS=Mus musculus OX=10090 GN=Ptk2 PE=1 SV=1;sp|P34152|FAK1_MOUSE Focal adhesion kinase 1 OS=Mus musculus OX=10090 GN=Ptk2 PE=1 SV=4	6	8	8	8	0	0	0	2	3	3	3	5	7	0	0	0	2	3	3	3	5	7	0	0	0	2	3	3	3	5	7	9.8	9.8	9.8	123.78	1093	1093;1052;126;967;1005;1009	0	18.703	0	0	0
A0A5H1ZRL3;Q8C4Y3;F6SWS9;F6UFF7	A0A5H1ZRL3;Q8C4Y3	17;16;6;1	17;16;6;1	17;16;6;1	Negative elongation factor B	Nelfb	tr|A0A5H1ZRL3|A0A5H1ZRL3_MOUSE Negative elongation factor B OS=Mus musculus OX=10090 GN=Nelfb PE=1 SV=1;sp|Q8C4Y3|NELFB_MOUSE Negative elongation factor B OS=Mus musculus OX=10090 GN=Nelfb PE=1 SV=2	4	17	17	17	0	0	0	13	15	13	8	6	7	0	0	0	13	15	13	8	6	7	0	0	0	13	15	13	8	6	7	32.3	32.3	32.3	70.32	631	631;580;204;144	0	84.761	0	0	0
A0A668KL73;Q5SUV2	A0A668KL73;Q5SUV2	3;3	3;3	3;3	MYCBP-associated protein	Mycbpap	tr|A0A668KL73|A0A668KL73_MOUSE MYCBP associated protein OS=Mus musculus OX=10090 GN=Mycbpap PE=1 SV=1;sp|Q5SUV2|MYBPP_MOUSE MYCBP-associated protein OS=Mus musculus OX=10090 GN=Mycbpap PE=1 SV=1	2	3	3	3	1	1	1	1	2	1	1	2	2	1	1	1	1	2	1	1	2	2	1	1	1	1	2	1	1	2	2	2.5	2.5	2.5	107.49	942	942;932	0	4.5141	1.1	1.1	1.1
G3UZJ2;G3UWW1;G3UZV6;Q80X35;Q80ZL4;Q3TLQ0;A0A668KLC6;P20357	G3UZJ2;G3UWW1;G3UZV6;Q80X35;Q80ZL4;Q3TLQ0;A0A668KLC6;P20357	2;2;2;2;2;2;2;2	2;2;2;2;2;2;2;2	2;2;2;2;2;2;2;2	Microtubule-associated protein;Microtubule-associated protein 2	Map2	tr|G3UZJ2|G3UZJ2_MOUSE Microtubule-associated protein (Fragment) OS=Mus musculus OX=10090 GN=Map2 PE=1 SV=8;tr|G3UWW1|G3UWW1_MOUSE Microtubule-associated protein (Fragment) OS=Mus musculus OX=10090 GN=Map2 PE=1 SV=1;tr|G3UZV6|G3UZV6_MOUSE Microtubule-assoc	8	2	2	2	0	0	0	1	1	2	2	0	2	0	0	0	1	1	2	2	0	2	0	0	0	1	1	2	2	0	2	9.2	9.2	9.2	25.652	240	240;336;381;466;467;498;1989;1828	0	11.159	0	0	0
A0A668KLV9;A0A668KLD3;Q9WTQ5;A0A668KM55	A0A668KLV9;A0A668KLD3;Q9WTQ5	6;6;6;1	6;6;6;1	6;6;6;1	A-kinase anchor protein 12	Akap12	tr|A0A668KLV9|A0A668KLV9_MOUSE A kinase (PRKA) anchor protein (gravin) 12 OS=Mus musculus OX=10090 GN=Akap12 PE=1 SV=1;tr|A0A668KLD3|A0A668KLD3_MOUSE A kinase (PRKA) anchor protein (Gravin) 12, isoform CRA_a OS=Mus musculus OX=10090 GN=Akap12 PE=1 SV=1;sp|	4	6	6	6	6	4	5	1	1	2	0	1	2	6	4	5	1	1	2	0	1	2	6	4	5	1	1	2	0	1	2	5.2	5.2	5.2	172.56	1604	1604;1604;1684;190	0	22.016	5.2	3.4	4.6
A0A6I8MWZ1;A2A5E1;A0A6I8MX00;A0A6I8MWX8;Q9QYI3;F7BTP8;A0A6I8MWZ9;A0A6I8MWY7;A0A6I8MWW2;A0A6I8MX31;A0A6I8MWZ5	A0A6I8MWZ1;A2A5E1;A0A6I8MX00;A0A6I8MWX8;Q9QYI3;F7BTP8;A0A6I8MWZ9;A0A6I8MWY7	9;9;9;9;9;6;6;6;2;2;1	9;9;9;9;9;6;6;6;2;2;1	9;9;9;9;9;6;6;6;2;2;1	DnaJ homolog subfamily C member 7	Dnajc7	tr|A0A6I8MWZ1|A0A6I8MWZ1_MOUSE DnaJ heat shock protein family (Hsp40) member C7 OS=Mus musculus OX=10090 GN=Dnajc7 PE=1 SV=1;tr|A2A5E1|A2A5E1_MOUSE DnaJ heat shock protein family (Hsp40) member C7 OS=Mus musculus OX=10090 GN=Dnajc7 PE=1 SV=2;tr|A0A6I8MX00|	11	9	9	9	2	1	1	4	3	4	4	2	3	2	1	1	4	3	4	4	2	3	2	1	1	4	3	4	4	2	3	23.1	23.1	23.1	50.114	438	438;478;484;579;494;268;315;347;156;159;115	0	11.198	5	3	2.7
Z4YJU8;A0A6I8MWY5;E9PUQ5;A0A6I8MX07;Q921M4;A2AN46	Z4YJU8;A0A6I8MWY5;E9PUQ5;A0A6I8MX07;Q921M4	5;5;5;5;5;1	5;5;5;5;5;1	5;5;5;5;5;1	Golgin subfamily A member 2	Golga2	tr|Z4YJU8|Z4YJU8_MOUSE Golgi autoantigen, golgin subfamily a, 2 OS=Mus musculus OX=10090 GN=Golga2 PE=1 SV=3;tr|A0A6I8MWY5|A0A6I8MWY5_MOUSE Golgi autoantigen, golgin subfamily a, 2 OS=Mus musculus OX=10090 GN=Golga2 PE=1 SV=1;tr|E9PUQ5|E9PUQ5_MOUSE Golgi a	6	5	5	5	0	0	0	3	1	1	5	3	3	0	0	0	3	1	1	5	3	3	0	0	0	3	1	1	5	3	3	6.6	6.6	6.6	108.63	955	955;987;1014;1026;999;331	0	14.788	0	0	0
A0A6I8MWZ8;Q8R5C0;P47802;D3YVW0;D3Z3F4;G3UYJ5;G3XA75;G3UXX9	A0A6I8MWZ8;Q8R5C0;P47802	9;5;5;4;4;3;3;2	9;5;5;4;4;3;3;2	5;1;1;0;1;0;0;1	Metaxin-1	Mtx1	tr|A0A6I8MWZ8|A0A6I8MWZ8_MOUSE Metaxin 1 OS=Mus musculus OX=10090 GN=Mtx1 PE=1 SV=1;tr|Q8R5C0|Q8R5C0_MOUSE Metaxin OS=Mus musculus OX=10090 GN=Mtx1 PE=1 SV=1;sp|P47802|MTX1_MOUSE Metaxin-1 OS=Mus musculus OX=10090 GN=Mtx1 PE=1 SV=1	8	9	9	5	0	1	0	4	4	5	4	3	3	0	1	0	4	4	5	4	3	3	0	1	0	3	1	3	1	1	0	22.3	22.3	11.9	51.341	461	461;317;317;286;355;162;172;185	0	26.482	0	2.6	0
Q8CJG1;A0A6I8MX18;H3BJ70	Q8CJG1;A0A6I8MX18;H3BJ70	9;9;7	4;4;2	1;1;0	Protein argonaute-1	Ago1	sp|Q8CJG1|AGO1_MOUSE Protein argonaute-1 OS=Mus musculus OX=10090 GN=Ago1 PE=1 SV=2;tr|A0A6I8MX18|A0A6I8MX18_MOUSE Argonaute RISC catalytic subunit 1 OS=Mus musculus OX=10090 GN=Ago1 PE=1 SV=1;tr|H3BJ70|H3BJ70_MOUSE Argonaute RISC catalytic subunit 1 (Frag	3	9	4	1	0	0	0	5	5	5	6	6	8	0	0	0	1	1	2	2	1	3	0	0	0	0	0	0	0	0	1	13.8	6.7	1.4	97.213	857	857;895;553	0	6.2147	0	0	0
A0A6I8MX27;P16125;D3Z7F0;A0A0N4SVV8	A0A6I8MX27;P16125;D3Z7F0;A0A0N4SVV8	10;10;6;5	8;8;4;3	8;8;4;3	L-lactate dehydrogenase B chain;L-lactate dehydrogenase	Ldhb	tr|A0A6I8MX27|A0A6I8MX27_MOUSE L-lactate dehydrogenase OS=Mus musculus OX=10090 GN=Ldhb PE=1 SV=1;sp|P16125|LDHB_MOUSE L-lactate dehydrogenase B chain OS=Mus musculus OX=10090 GN=Ldhb PE=1 SV=2;tr|D3Z7F0|D3Z7F0_MOUSE L-lactate dehydrogenase (Fragment) OS=M	4	10	8	8	8	8	7	7	5	9	2	2	2	7	6	6	5	4	7	1	1	1	7	6	6	5	4	7	1	1	1	32.8	25.5	25.5	37.238	341	341;334;198;193	0	15.815	26.4	25.5	23.2
A0A8V5KY98	A0A8V5KY98	8	8	8			tr|A0A8V5KY98|A0A8V5KY98_MOUSE Uncharacterized protein OS=Mus musculus OX=10090 GN=Gm56924 PE=4 SV=1	1	8	8	8	4	4	4	5	5	6	5	5	5	4	4	4	5	5	6	5	5	5	4	4	4	5	5	6	5	5	5	55.2	55.2	55.2	17.004	154	154	0	36.513	32.5	36.4	35.1
A0A991EKZ2	A0A991EKZ2	46	38	4			tr|A0A991EKZ2|A0A991EKZ2_MOUSE FMR1 autosomal homolog 2 OS=Mus musculus OX=10090 GN=Fxr2 PE=1 SV=1	1	46	38	4	10	8	8	12	14	14	41	41	43	6	4	5	9	11	10	34	34	37	1	1	2	2	2	2	4	4	4	74.8	69.3	10	81.098	749	749	0	323.31	15.8	12.3	12.4
A0A991ENV6;Q8VIJ6	A0A991ENV6;Q8VIJ6	46;46	46;46	44;44	Splicing factor, proline- and glutamine-rich	Sfpq	tr|A0A991ENV6|A0A991ENV6_MOUSE Splicing factor proline/glutamine rich (polypyrimidine tract binding protein associated) OS=Mus musculus OX=10090 GN=Sfpq PE=1 SV=1;sp|Q8VIJ6|SFPQ_MOUSE Splicing factor, proline- and glutamine-rich OS=Mus musculus OX=10090 GN	2	46	46	44	7	9	8	33	30	32	40	40	40	7	9	8	33	30	32	40	40	40	6	7	6	31	29	30	38	38	38	50.1	50.1	48.8	77.876	720	720;699	0	323.31	11.7	14.6	12.1
A0A991ENW0	A0A991ENW0	16	16	4			tr|A0A991ENW0|A0A991ENW0_MOUSE H1.10 linker histone OS=Mus musculus OX=10090 GN=H1f10 PE=1 SV=1	1	16	16	4	0	0	0	6	3	3	10	14	12	0	0	0	6	3	3	10	14	12	0	0	0	0	0	0	3	4	3	57.3	57.3	22.2	25.505	239	239	0	149.06	0	0	0
Q3U3V8;A0A991ENW4;A0A140LJE1	Q3U3V8;A0A991ENW4	3;3;1	3;3;1	3;3;1	X-ray radiation resistance-associated protein 1	Xrra1	sp|Q3U3V8|XRRA1_MOUSE X-ray radiation resistance-associated protein 1 OS=Mus musculus OX=10090 GN=Xrra1 PE=2 SV=1;tr|A0A991ENW4|A0A991ENW4_MOUSE X-ray radiation resistance associated 1 OS=Mus musculus OX=10090 GN=Xrra1 PE=1 SV=1	3	3	3	3	0	0	0	0	0	0	1	2	3	0	0	0	0	0	0	1	2	3	0	0	0	0	0	0	1	2	3	4.2	4.2	4.2	88.883	786	786;845;361	0	4.9786	0	0	0
A0A991EQV5;P60670	A0A991EQV5;P60670	5;4	5;4	5;4	Nuclear protein localization protein 4 homolog	Nploc4	tr|A0A991EQV5|A0A991EQV5_MOUSE NPL4 homolog, ubiquitin recognition factor OS=Mus musculus OX=10090 GN=Nploc4 PE=1 SV=1;sp|P60670|NPL4_MOUSE Nuclear protein localization protein 4 homolog OS=Mus musculus OX=10090 GN=Nploc4 PE=1 SV=3	2	5	5	5	0	1	0	0	0	1	2	5	4	0	1	0	0	0	1	2	5	4	0	1	0	0	0	1	2	5	4	13.1	13.1	13.1	72.429	651	651;608	0	21.398	0	1.8	0
A0A9L6KDP1;A0A9L6KE76	A0A9L6KDP1;A0A9L6KE76	8;7	8;7	8;7			tr|A0A9L6KDP1|A0A9L6KDP1_MOUSE Predicted gene 11837 OS=Mus musculus OX=10090 GN=Gm11837 PE=4 SV=1;tr|A0A9L6KE76|A0A9L6KE76_MOUSE Predicted gene 11837 OS=Mus musculus OX=10090 GN=Gm11837 PE=4 SV=1	2	8	8	8	0	0	0	6	7	5	6	6	6	0	0	0	6	7	5	6	6	6	0	0	0	6	7	5	6	6	6	65	65	65	13.336	117	117;80	0	62.595	0	0	0
A0A9S4HM55	A0A9S4HM55	43	3	3			tr|A0A9S4HM55|A0A9S4HM55_MOUSE PCF11 cleavage and polyadenylation factor subunit (Fragment) OS=Mus musculus OX=10090 GN=Pcf11 PE=4 SV=1	1	43	3	3	0	0	0	15	18	12	29	28	28	0	0	0	0	0	0	0	1	2	0	0	0	0	0	0	0	1	2	35.5	3	3	164.44	1476	1476	0.00090416	2.4852	0	0	0
A0JLY1	A0JLY1	1	1	1	Coiled-coil domain-containing protein 173	Ccdc173	sp|A0JLY1|CF210_MOUSE Cilia- and flagella- associated protein 210 OS=Mus musculus OX=10090 GN=Cfap210 PE=1 SV=1	1	1	1	1	0	0	0	0	0	0	0	1	0	0	0	0	0	0	0	0	1	0	0	0	0	0	0	0	0	1	0	2.6	2.6	2.6	65.131	547	547	1	-2	0	0	0
A0JP43;A0A0A0MQI1	A0JP43;A0A0A0MQI1	3;2	3;2	3;2	EF-hand calcium-binding domain-containing protein 5	Efcab5	sp|A0JP43|EFCB5_MOUSE EF-hand calcium-binding domain-containing protein 5 OS=Mus musculus OX=10090 GN=Efcab5 PE=1 SV=2;tr|A0A0A0MQI1|A0A0A0MQI1_MOUSE EF-hand calcium binding domain 5 (Fragment) OS=Mus musculus OX=10090 GN=Efcab5 PE=1 SV=1	2	3	3	3	0	0	0	0	0	1	2	3	2	0	0	0	0	0	1	2	3	2	0	0	0	0	0	1	2	3	2	2.1	2.1	2.1	159.93	1406	1406;982	0	3.2959	0	0	0
A1BN54;Q7TPR4;A0A1L1SV25;P57780;A0A1L1SVJ6	A1BN54;Q7TPR4;A0A1L1SV25;P57780	5;5;4;4;1	1;1;1;1;1	1;1;1;1;1	Alpha-actinin-1;Alpha-actinin-4	Actn1;Actn4	tr|A1BN54|A1BN54_MOUSE Actinin, alpha 1 OS=Mus musculus OX=10090 GN=Actn1 PE=1 SV=1;sp|Q7TPR4|ACTN1_MOUSE Alpha-actinin-1 OS=Mus musculus OX=10090 GN=Actn1 PE=1 SV=1;tr|A0A1L1SV25|A0A1L1SV25_MOUSE Actinin alpha 4 OS=Mus musculus OX=10090 GN=Actn4 PE=1 SV=1	5	5	1	1	5	3	1	0	1	1	0	0	0	1	1	1	0	1	1	0	0	0	1	1	1	0	1	1	0	0	0	7	1.4	1.4	102.72	887	887;892;932;912;323	0.0021749	2.216	7	5.3	1.4
A2A432;E9PXY1;J3QJX0	A2A432;E9PXY1;J3QJX0	11;11;6	4;4;3	4;4;3	Cullin-4B	Cul4b	sp|A2A432|CUL4B_MOUSE Cullin-4B OS=Mus musculus OX=10090 GN=Cul4b PE=1 SV=1;tr|E9PXY1|E9PXY1_MOUSE Cullin 4B OS=Mus musculus OX=10090 GN=Cul4b PE=1 SV=2;tr|J3QJX0|J3QJX0_MOUSE Cullin 4B OS=Mus musculus OX=10090 GN=Cul4b PE=1 SV=1	3	11	4	4	1	1	2	4	2	3	4	8	8	0	0	0	1	0	0	2	2	3	0	0	0	1	0	0	2	2	3	13.6	5.4	5.4	110.7	970	970;896;552	0	7.7491	1	1	1.9
Q05BC8;A2A4N5;A2A4N8;A2A4N7;K3W4P1;P97432	Q05BC8;A2A4N5;A2A4N8;A2A4N7;K3W4P1;P97432	2;2;2;2;2;2	2;2;2;2;2;2	2;2;2;2;2;2	Next to BRCA1 gene 1 protein	Nbr1	tr|Q05BC8|Q05BC8_MOUSE NBR1, autophagy cargo receptor OS=Mus musculus OX=10090 GN=Nbr1 PE=1 SV=1;tr|A2A4N5|A2A4N5_MOUSE NBR1, autophagy cargo receptor OS=Mus musculus OX=10090 GN=Nbr1 PE=1 SV=1;tr|A2A4N8|A2A4N8_MOUSE NBR1, autophagy cargo receptor OS=Mus m	6	2	2	2	0	1	0	0	0	0	0	2	0	0	1	0	0	0	0	0	2	0	0	1	0	0	0	0	0	2	0	2.4	2.4	2.4	98.815	888	888;906;951;963;988;988	0.0037736	1.8884	0	1.2	0
A2A4P0;A2A4N9	A2A4P0;A2A4N9	21;17	20;16	20;16	ATP-dependent RNA helicase DHX8	Dhx8	sp|A2A4P0|DHX8_MOUSE ATP-dependent RNA helicase DHX8 OS=Mus musculus OX=10090 GN=Dhx8 PE=2 SV=1;tr|A2A4N9|A2A4N9_MOUSE RNA helicase (Fragment) OS=Mus musculus OX=10090 GN=Dhx8 PE=1 SV=8	2	21	20	20	0	0	0	7	7	7	17	20	18	0	0	0	6	6	6	16	19	17	0	0	0	6	6	6	16	19	17	22.3	21.5	21.5	142.57	1244	1244;1174	0	144.67	0	0	0
E9Q7P0;A2A520;K3W4R0;Q69Z23	E9Q7P0;A2A520;K3W4R0;Q69Z23	4;4;4;4	2;2;2;2	2;2;2;2	Dynein heavy chain 17, axonemal	Dnah17	tr|E9Q7P0|E9Q7P0_MOUSE Dynein, axonemal, heavy chain 17 OS=Mus musculus OX=10090 GN=Dnah17 PE=1 SV=1;tr|A2A520|A2A520_MOUSE Dynein, axonemal, heavy chain 17 OS=Mus musculus OX=10090 GN=Dnah17 PE=1 SV=3;tr|K3W4R0|K3W4R0_MOUSE Dynein, axonemal, heavy chain 1	4	4	2	2	0	0	0	0	1	1	3	3	3	0	0	0	0	0	1	2	1	1	0	0	0	0	0	1	2	1	1	0.9	0.6	0.6	509.03	4453	4453;4459;4481;4481	0	2.942	0	0	0
A2A547;P84099	A2A547;P84099	8;8	8;8	8;8	Ribosomal protein L19;60S ribosomal protein L19	Rpl19	tr|A2A547|A2A547_MOUSE Ribosomal protein L19 OS=Mus musculus OX=10090 GN=Rpl19 PE=1 SV=1;sp|P84099|RL19_MOUSE Large ribosomal subunit protein eL19 OS=Mus musculus OX=10090 GN=Rpl19 PE=1 SV=1	2	8	8	8	3	4	5	5	4	5	5	6	5	3	4	5	5	4	5	5	6	5	3	4	5	5	4	5	5	6	5	32.5	32.5	32.5	23.247	194	194;196	0	51.176	9.3	22.7	23.7
A2A5S3;V9GX87	A2A5S3;V9GX87	33;24	33;24	1;1		Stau1	tr|A2A5S3|A2A5S3_MOUSE Staufen double-stranded RNA binding protein 1 OS=Mus musculus OX=10090 GN=Stau1 PE=1 SV=1;tr|V9GX87|V9GX87_MOUSE Staufen double-stranded RNA binding protein 1 OS=Mus musculus OX=10090 GN=Stau1 PE=1 SV=1	2	33	33	1	1	1	0	21	22	21	28	28	30	1	1	0	21	22	21	28	28	30	0	0	0	1	1	1	1	1	1	61	61	3.2	54.855	495	495;436	0	292.71	2.6	1.6	0
A2A6Q8;Q9CZ19;P09541	A2A6Q8;Q9CZ19;P09541	3;3;3	3;3;3	2;2;2	Myosin light chain 4	Myl4	tr|A2A6Q8|A2A6Q8_MOUSE Myosin, light polypeptide 4 (Fragment) OS=Mus musculus OX=10090 GN=Myl4 PE=1 SV=8;tr|Q9CZ19|Q9CZ19_MOUSE Myosin, light polypeptide 4 OS=Mus musculus OX=10090 GN=Myl4 PE=1 SV=1;sp|P09541|MYL4_MOUSE Myosin light chain 4 OS=Mus musculus	3	3	3	2	3	3	3	1	2	1	1	2	2	3	3	3	1	2	1	1	2	2	2	2	2	0	1	1	1	1	1	19.4	19.4	14.7	21.045	191	191;193;193	0	11.254	19.4	19.4	19.4
A2A6U3;Q80UG5;A2A6U5;A8Y5D3	A2A6U3;Q80UG5	21;21;8;1	21;21;8;1	21;21;8;1	Septin-9	2024-09-09	tr|A2A6U3|A2A6U3_MOUSE Septin 9 OS=Mus musculus OX=10090 GN=Septin9 PE=1 SV=1;sp|Q80UG5|SEPT9_MOUSE Septin-9 OS=Mus musculus OX=10090 GN=Septin9 PE=1 SV=1	4	21	21	21	6	5	5	7	8	8	16	14	16	6	5	5	7	8	8	16	14	16	6	5	5	7	8	8	16	14	16	37.3	37.3	37.3	63.772	565	565;583;242;74	0	55.721	10.8	8.3	8.1
A2A7K5;Q9EQS3	A2A7K5;Q9EQS3	2;2	2;2	2;2	C-Myc-binding protein	Mycbp	tr|A2A7K5|A2A7K5_MOUSE MYC binding protein OS=Mus musculus OX=10090 GN=Mycbp PE=1 SV=1;sp|Q9EQS3|MYCBP_MOUSE c-Myc-binding protein OS=Mus musculus OX=10090 GN=Mycbp PE=1 SV=5	2	2	2	2	0	0	0	0	0	0	2	2	2	0	0	0	0	0	0	2	2	2	0	0	0	0	0	0	2	2	2	19.9	19.9	19.9	16.614	146	146;103	0	8.045	0	0	0
A2A815;A2A813;Q99LX0;A2A817;A2A816	A2A815;A2A813;Q99LX0;A2A817;A2A816	3;3;3;2;2	3;3;3;2;2	3;3;3;2;2	Protein deglycase DJ-1	Park7	tr|A2A815|A2A815_MOUSE protein deglycase (Fragment) OS=Mus musculus OX=10090 GN=Park7 PE=1 SV=8;tr|A2A813|A2A813_MOUSE protein deglycase OS=Mus musculus OX=10090 GN=Park7 PE=1 SV=1;sp|Q99LX0|PARK7_MOUSE Parkinson disease protein 7 homolog OS=Mus musculus O	5	3	3	3	0	0	2	0	1	0	0	0	0	0	0	2	0	1	0	0	0	0	0	0	2	0	1	0	0	0	0	23.7	23.7	23.7	14.243	135	135;175;189;84;125	0	2.8612	0	0	11.9
A2A848;Q9R0H0	A2A848;Q9R0H0	2;2	2;2	2;2	Peroxisomal acyl-coenzyme A oxidase 1	Acox1	tr|A2A848|A2A848_MOUSE Acyl-Coenzyme A oxidase 1, palmitoyl (Fragment) OS=Mus musculus OX=10090 GN=Acox1 PE=1 SV=1;sp|Q9R0H0|ACOX1_MOUSE Peroxisomal acyl-coenzyme A oxidase 1 OS=Mus musculus OX=10090 GN=Acox1 PE=1 SV=5	2	2	2	2	1	1	1	0	1	1	0	1	1	1	1	1	0	1	1	0	1	1	1	1	1	0	1	1	0	1	1	5.8	5.8	5.8	70.03	625	625;661	0.0033713	1.9304	2.6	2.6	2.6
E9QKA4;A2A8V8;A2A8V9;E9PUK6;Q52KI8;A2A983;F6T4M4;F6UK16	E9QKA4;A2A8V8;A2A8V9;E9PUK6;Q52KI8;A2A983	9;9;9;9;9;5;2;1	9;9;9;9;9;5;2;1	9;9;9;9;9;5;2;1	Serine/arginine repetitive matrix protein 1	Srrm1	tr|E9QKA4|E9QKA4_MOUSE Serine/arginine repetitive matrix 1 OS=Mus musculus OX=10090 GN=Srrm1 PE=1 SV=1;tr|A2A8V8|A2A8V8_MOUSE Serine/arginine repetitive matrix 1 OS=Mus musculus OX=10090 GN=Srrm1 PE=1 SV=1;tr|A2A8V9|A2A8V9_MOUSE Serine/arginine repetitive	8	9	9	9	0	0	0	0	0	1	7	9	7	0	0	0	0	0	1	7	9	7	0	0	0	0	0	1	7	9	7	13.8	13.8	13.8	101.16	897	897;909;918;923;946;198;140;318	0	115.62	0	0	0
E9Q472;A2A9H6;B1AWG4	E9Q472;A2A9H6;B1AWG4	2;2;1	2;2;1	2;2;1		Gm884;Lrrc37a	tr|E9Q472|E9Q472_MOUSE Predicted gene 884 OS=Mus musculus OX=10090 GN=Lrrc37 PE=1 SV=1;tr|A2A9H6|A2A9H6_MOUSE Predicted gene 884 OS=Mus musculus OX=10090 GN=Lrrc37 PE=1 SV=1;tr|B1AWG4|B1AWG4_MOUSE Leucine rich repeat containing 37A OS=Mus musculus OX=10090	3	2	2	2	0	0	0	1	2	2	2	2	1	0	0	0	1	2	2	2	2	1	0	0	0	1	2	2	2	2	1	1.7	1.7	1.7	165.16	1467	1467;3643;3298	0	4.4387	0	0	0
A2A9I7	A2A9I7	1	1	1	Doublesex- and mab-3-related transcription factor B1	Dmrtb1	sp|A2A9I7|DMRTB_MOUSE Doublesex- and mab-3-related transcription factor B1 OS=Mus musculus OX=10090 GN=Dmrtb1 PE=1 SV=1	1	1	1	1	0	0	0	0	0	0	1	0	0	0	0	0	0	0	0	1	0	0	0	0	0	0	0	0	1	0	0	4.7	4.7	4.7	38.423	359	359	0.00088535	2.3322	0	0	0
Q8C1L6;A2A9K3;Q8BMK0	Q8C1L6;A2A9K3;Q8BMK0	1;1;1	1;1;1	1;1;1	Centrosomal protein of 85 kDa	Cep85	tr|Q8C1L6|Q8C1L6_MOUSE Centrosomal protein 85 OS=Mus musculus OX=10090 GN=Cep85 PE=1 SV=1;tr|A2A9K3|A2A9K3_MOUSE Centrosomal protein 85 OS=Mus musculus OX=10090 GN=Cep85 PE=1 SV=1;sp|Q8BMK0|CEP85_MOUSE Centrosomal protein of 85 kDa OS=Mus musculus OX=10090	3	1	1	1	0	0	0	0	0	0	0	1	0	0	0	0	0	0	0	0	1	0	0	0	0	0	0	0	0	1	0	23.4	23.4	23.4	8.2249	77	77;759;761	0	4.7071	0	0	0
A2A9P6;P24788	A2A9P6;P24788	1;1	1;1	1;1	Cyclin-dependent kinase 11B	Cdk11b	tr|A2A9P6|A2A9P6_MOUSE Cyclin-dependent kinase 11B OS=Mus musculus OX=10090 GN=Cdk11b PE=1 SV=1;sp|P24788|CD11B_MOUSE Cyclin-dependent kinase 11B OS=Mus musculus OX=10090 GN=Cdk11b PE=1 SV=2	2	1	1	1	0	0	0	0	0	0	1	1	0	0	0	0	0	0	0	1	1	0	0	0	0	0	0	0	1	1	0	1.7	1.7	1.7	87.319	750	750;784	0.0037516	1.8492	0	0	0
A6PWC3;A2A9Q2;Q8BHG1;Q3V3G9	A6PWC3;A2A9Q2;Q8BHG1;Q3V3G9	4;4;4;2	4;4;4;2	4;4;4;2	Nardilysin	Nrd1	tr|A6PWC3|A6PWC3_MOUSE Nardilysin, N-arginine dibasic convertase, NRD convertase 1 OS=Mus musculus OX=10090 GN=Nrdc PE=1 SV=1;tr|A2A9Q2|A2A9Q2_MOUSE Nardilysin, N-arginine dibasic convertase, NRD convertase 1 OS=Mus musculus OX=10090 GN=Nrdc PE=1 SV=1;sp|Q	4	4	4	4	2	1	3	0	1	0	0	0	0	2	1	3	0	1	0	0	0	0	2	1	3	0	1	0	0	0	0	3.7	3.7	3.7	127.77	1117	1117;1229;1161;395	0	4.3991	2.1	0.9	2.9
A2A9R3	A2A9R3	5	5	5		Mageb4	sp|A2A9R3|MAGB4_MOUSE Melanoma-associated antigen B4 OS=Mus musculus OX=10090 GN=Mageb4 PE=1 SV=1	1	5	5	5	2	1	1	1	0	0	3	1	3	2	1	1	1	0	0	3	1	3	2	1	1	1	0	0	3	1	3	12.9	12.9	12.9	60.922	556	556	0	10.894	4.9	2.7	2.7
A2A9S6	A2A9S6	1	1	1		Agbl4	tr|A2A9S6|A2A9S6_MOUSE ATP/GTP binding protein-like 4 OS=Mus musculus OX=10090 GN=Agbl4 PE=1 SV=1	1	1	1	1	0	0	0	1	1	1	1	1	0	0	0	0	1	1	1	1	1	0	0	0	0	1	1	1	1	1	0	7.3	7.3	7.3	18.173	164	164	0	7.4653	0	0	0
O35250;A2AAN0;A2AAN3	O35250;A2AAN0;A2AAN3	2;2;1	2;2;1	2;2;1	Exocyst complex component 7	Exoc7	sp|O35250|EXOC7_MOUSE Exocyst complex component 7 OS=Mus musculus OX=10090 GN=Exoc7 PE=1 SV=2;tr|A2AAN0|A2AAN0_MOUSE Exocyst complex component 7 OS=Mus musculus OX=10090 GN=Exoc7 PE=1 SV=1;tr|A2AAN3|A2AAN3_MOUSE Exocyst complex component 7 (Fragment) OS=Mu	3	2	2	2	0	0	0	0	0	0	0	2	0	0	0	0	0	0	0	0	2	0	0	0	0	0	0	0	0	2	0	3.4	3.4	3.4	79.959	697	697;684;288	0.00089969	2.4422	0	0	0
A2AC29;P70245	A2AC29;P70245	1;1	1;1	1;1	3-beta-hydroxysteroid-Delta(8),Delta(7)-isomerase	Ebp	tr|A2AC29|A2AC29_MOUSE Phenylalkylamine Ca2+ antagonist (emopamil) binding protein (Fragment) OS=Mus musculus OX=10090 GN=Ebp PE=1 SV=1;sp|P70245|EBP_MOUSE 3-beta-hydroxysteroid-Delta(8),Delta(7)-isomerase OS=Mus musculus OX=10090 GN=Ebp PE=1 SV=3	2	1	1	1	1	0	1	0	0	1	0	1	1	1	0	1	0	0	1	0	1	1	1	0	1	0	0	1	0	1	1	10.7	10.7	10.7	13.686	121	121;230	0.00091743	2.5899	10.7	0	10.7
F8WHN4;A2ACC6;E9Q0J2;Q8BQZ4;A2ACC7	F8WHN4;A2ACC6;E9Q0J2;Q8BQZ4;A2ACC7	9;9;9;9;7	9;9;9;9;7	9;9;9;9;7	Ral GTPase-activating protein subunit beta	Ralgapb	tr|F8WHN4|F8WHN4_MOUSE Ral GTPase activating protein, beta subunit (non-catalytic) OS=Mus musculus OX=10090 GN=Ralgapb PE=1 SV=1;tr|A2ACC6|A2ACC6_MOUSE Ral GTPase activating protein, beta subunit (non-catalytic) OS=Mus musculus OX=10090 GN=Ralgapb PE=1 SV=	5	9	9	9	0	0	0	0	0	0	4	4	4	0	0	0	0	0	0	4	4	4	0	0	0	0	0	0	4	4	4	8	8	8	166.17	1491	1491;1495;1507;1484;1173	0	20.372	0	0	0
A2ACG7;Q9DBG6	A2ACG7;Q9DBG6	19;19	19;19	19;19	Dolichyl-diphosphooligosaccharide--protein glycosyltransferase subunit 2	Rpn2	tr|A2ACG7|A2ACG7_MOUSE Dolichyl-diphosphooligosaccharide--protein glycosyltransferase subunit 2 OS=Mus musculus OX=10090 GN=Rpn2 PE=1 SV=1;sp|Q9DBG6|RPN2_MOUSE Dolichyl-diphosphooligosaccharide--protein glycosyltransferase subunit 2 OS=Mus musculus OX=1009	2	19	19	19	6	6	9	11	10	11	12	11	13	6	6	9	11	10	11	12	11	13	6	6	9	11	10	11	12	11	13	33.5	33.5	33.5	67.501	615	615;631	0	323.31	14.8	15.6	22.3
A2ACQ1;Q8K1G9;A2ACP9	A2ACQ1;Q8K1G9	5;5;2	5;5;2	5;5;2		Dhx35	tr|A2ACQ1|A2ACQ1_MOUSE RNA helicase OS=Mus musculus OX=10090 GN=Dhx35 PE=1 SV=1;tr|Q8K1G9|Q8K1G9_MOUSE RNA helicase OS=Mus musculus OX=10090 GN=Dhx35 PE=1 SV=1	3	5	5	5	0	0	0	2	0	1	3	2	2	0	0	0	2	0	1	3	2	2	0	0	0	2	0	1	3	2	2	8.3	8.3	8.3	78.739	703	703;679;213	0	4.2331	0	0	0
A2ADA5	A2ADA5	5	5	5	tRNA pseudouridine synthase-like 1	Pusl1	sp|A2ADA5|PUSL1_MOUSE tRNA pseudouridine synthase-like 1 OS=Mus musculus OX=10090 GN=Pusl1 PE=1 SV=1	1	5	5	5	0	0	0	4	3	3	0	0	0	0	0	0	4	3	3	0	0	0	0	0	0	4	3	3	0	0	0	18.6	18.6	18.6	31.992	291	291	0	14.622	0	0	0
A2ADH1;Q9CQY5	A2ADH1;Q9CQY5	3;3	3;3	3;3	Magnesium transporter protein 1	Magt1	tr|A2ADH1|A2ADH1_MOUSE Magnesium transporter 1 OS=Mus musculus OX=10090 GN=Magt1 PE=1 SV=1;sp|Q9CQY5|MAGT1_MOUSE Magnesium transporter protein 1 OS=Mus musculus OX=10090 GN=Magt1 PE=1 SV=1	2	3	3	3	0	0	0	0	0	1	1	0	3	0	0	0	0	0	1	1	0	3	0	0	0	0	0	1	1	0	3	8.4	8.4	8.4	41.637	368	368;335	0	3.035	0	0	0
Q3U6K5;A2AED8;A2AED9	Q3U6K5;A2AED8	7;7;1	7;7;1	7;7;1	Spermatogenesis-associated protein 6	Spata6	sp|Q3U6K5|SPAT6_MOUSE Spermatogenesis-associated protein 6 OS=Mus musculus OX=10090 GN=Spata6 PE=1 SV=2;tr|A2AED8|A2AED8_MOUSE Spermatogenesis associated 6 OS=Mus musculus OX=10090 GN=Spata6 PE=1 SV=1	3	7	7	7	2	1	3	4	5	5	1	1	1	2	1	3	4	5	5	1	1	1	2	1	3	4	5	5	1	1	1	17	17	17	56.101	488	488;472;93	0	13.034	4.7	2.7	7.4
A2BHD2;A2AEP0	A2BHD2;A2AEP0	2;2	2;2	2;2		Gm14743;Obp1b	tr|A2BHD2|A2BHD2_MOUSE Predicted gene 14743 OS=Mus musculus OX=10090 GN=Gm14743 PE=1 SV=1;sp|A2AEP0|OBP1B_MOUSE Odorant-binding protein 1b OS=Mus musculus OX=10090 GN=Obp1b PE=1 SV=1	2	2	2	2	2	2	2	0	2	0	0	0	0	2	2	2	0	2	0	0	0	0	2	2	2	0	2	0	0	0	0	14.6	14.6	14.6	19.366	171	171;171	0	4.9051	14.6	14.6	14.6
A2AFI6	A2AFI6	1	1	1		Gm364	tr|A2AFI6|A2AFI6_MOUSE Transmembrane 9 superfamily member OS=Mus musculus OX=10090 GN=Tm9sf5 PE=1 SV=1	1	1	1	1	1	1	0	0	0	0	0	0	0	1	1	0	0	0	0	0	0	0	1	1	0	0	0	0	0	0	0	3.1	3.1	3.1	77.299	671	671	0.0025829	2.134	3.1	3.1	0
Q7TMY8;A2AFQ0;F6XP90	Q7TMY8;A2AFQ0	3;3;1	3;3;1	3;3;1	E3 ubiquitin-protein ligase HUWE1	Huwe1	sp|Q7TMY8|HUWE1_MOUSE E3 ubiquitin-protein ligase HUWE1 OS=Mus musculus OX=10090 GN=Huwe1 PE=1 SV=5;tr|A2AFQ0|A2AFQ0_MOUSE HECT-type E3 ubiquitin transferase OS=Mus musculus OX=10090 GN=Huwe1 PE=1 SV=1	3	3	3	3	0	0	1	0	0	0	2	1	1	0	0	1	0	0	0	2	1	1	0	0	1	0	0	0	2	1	1	1.2	1.2	1.2	482.63	4377	4377;4378;1176	0	7.1981	0	0	0.3
A2AFQ9;E9PUU4;Q8BX17;F7CKD6	A2AFQ9;E9PUU4;Q8BX17	37;37;37;4	37;37;37;4	37;37;37;4	Gem-associated protein 5	Gemin5	tr|A2AFQ9|A2AFQ9_MOUSE Gem nuclear organelle associated protein 5 OS=Mus musculus OX=10090 GN=Gemin5 PE=1 SV=1;tr|E9PUU4|E9PUU4_MOUSE Gem nuclear organelle associated protein 5 OS=Mus musculus OX=10090 GN=Gemin5 PE=1 SV=1;sp|Q8BX17|GEMI5_MOUSE Gem-associat	4	37	37	37	0	0	0	15	20	21	18	17	18	0	0	0	15	20	21	18	17	18	0	0	0	15	20	21	18	17	18	30.4	30.4	30.4	166.52	1501	1501;1503;1502;177	0	117.31	0	0	0
A2AG06;A0A0R3P9D4	A2AG06;A0A0R3P9D4	14;8	14;8	14;8	Uncharacterized protein C17orf104 homolog	Gm1564	sp|A2AG06|MEIOC_MOUSE Meiosis-specific coiled-coil domain-containing protein MEIOC OS=Mus musculus OX=10090 GN=Meioc PE=1 SV=1;tr|A0A0R3P9D4|A0A0R3P9D4_MOUSE Meiosis specific with coiled-coil domain (Fragment) OS=Mus musculus OX=10090 GN=Meioc PE=1 SV=1	2	14	14	14	1	2	0	5	4	5	10	8	9	1	2	0	5	4	5	10	8	9	1	2	0	5	4	5	10	8	9	16.5	16.5	16.5	108.83	965	965;527	0	33.895	0.8	1.9	0
A2AG30;O89114	A2AG30;O89114	1;1	1;1	1;1	DnaJ homolog subfamily B member 5	Dnajb5	tr|A2AG30|A2AG30_MOUSE DnaJ heat shock protein family (Hsp40) member B5 OS=Mus musculus OX=10090 GN=Dnajb5 PE=1 SV=1;sp|O89114|DNJB5_MOUSE DnaJ homolog subfamily B member 5 OS=Mus musculus OX=10090 GN=Dnajb5 PE=2 SV=1	2	1	1	1	0	0	0	0	0	0	1	0	1	0	0	0	0	0	0	1	0	1	0	0	0	0	0	0	1	0	1	4.2	4.2	4.2	43.018	382	382;348	0.0037469	1.8423	0	0	0
A2AG41;Q99JB2	A2AG41;Q99JB2	1;1	1;1	1;1	Stomatin-like protein 2, mitochondrial	Stoml2	tr|A2AG41|A2AG41_MOUSE Stomatin (Epb7.2)-like 2 (Fragment) OS=Mus musculus OX=10090 GN=Stoml2 PE=1 SV=10;sp|Q99JB2|STML2_MOUSE Stomatin-like protein 2, mitochondrial OS=Mus musculus OX=10090 GN=Stoml2 PE=1 SV=1	2	1	1	1	1	1	0	1	1	1	1	1	1	1	1	0	1	1	1	1	1	1	1	1	0	1	1	1	1	1	1	7.1	7.1	7.1	23.976	212	212;353	0	3.122	7.1	7.1	0
A2AGL5;Q9D9K3	A2AGL5;Q9D9K3	1;1	1;1	1;1	Cell death regulator Aven	Aven	tr|A2AGL5|A2AGL5_MOUSE Apoptosis, caspase activation inhibitor OS=Mus musculus OX=10090 GN=Aven PE=1 SV=1;sp|Q9D9K3|AVEN_MOUSE Cell death regulator Aven OS=Mus musculus OX=10090 GN=Aven PE=1 SV=2	2	1	1	1	0	0	0	0	1	0	1	0	1	0	0	0	0	1	0	1	0	1	0	0	0	0	1	0	1	0	1	10.1	10.1	10.1	24.072	217	217;342	0	2.8677	0	0	0
A2AGN7;B7ZCF1;O88685;A0A087WPH7;F6Q2E3	A2AGN7;B7ZCF1;O88685;A0A087WPH7	5;5;5;3;2	5;5;5;3;2	5;5;5;3;2	26S protease regulatory subunit 6A	Psmc3	tr|A2AGN7|A2AGN7_MOUSE Proteasome (prosome, macropain) 26S subunit, ATPase 3 OS=Mus musculus OX=10090 GN=Psmc3 PE=1 SV=1;tr|B7ZCF1|B7ZCF1_MOUSE Proteasome (prosome, macropain) 26S subunit, ATPase 3 OS=Mus musculus OX=10090 GN=Psmc3 PE=1 SV=1;sp|O88685|PRS6	5	5	5	5	1	4	3	2	2	2	2	1	1	1	4	3	2	2	2	2	1	1	1	4	3	2	2	2	2	1	1	19	19	19	44.669	400	400;451;442;305;203	0	16.084	4.2	14.2	10.5
A2AGR6;Q99J79	A2AGR6;Q99J79	1;1	1;1	1;1	DNA damage-binding protein 2	Ddb2	tr|A2AGR6|A2AGR6_MOUSE DNA damage-binding protein 2 OS=Mus musculus OX=10090 GN=Ddb2 PE=1 SV=1;sp|Q99J79|DDB2_MOUSE DNA damage-binding protein 2 OS=Mus musculus OX=10090 GN=Ddb2 PE=1 SV=1	2	1	1	1	0	0	0	0	1	0	1	1	1	0	0	0	0	1	0	1	1	1	0	0	0	0	1	0	1	1	1	3.7	3.7	3.7	33.408	296	296;432	0.0013187	2.2736	0	0	0
A2AH85;O08810;G3UZ34;G3UXK8;G3UZ25	A2AH85;O08810;G3UZ34	48;48;47;4;1	48;48;47;4;1	47;47;46;3;1	116 kDa U5 small nuclear ribonucleoprotein component	Eftud2	tr|A2AH85|A2AH85_MOUSE 116 kDa U5 small nuclear ribonucleoprotein component OS=Mus musculus OX=10090 GN=Eftud2 PE=1 SV=1;sp|O08810|U5S1_MOUSE 116 kDa U5 small nuclear ribonucleoprotein component OS=Mus musculus OX=10090 GN=Eftud2 PE=1 SV=1;tr|G3UZ34|G3UZ34	5	48	48	47	4	3	3	18	19	22	43	38	40	4	3	3	18	19	22	43	38	40	4	3	3	17	18	21	42	37	39	56.4	56.4	55.3	109.49	972	972;971;962;85;98	0	323.31	5.5	3.9	3.9
A2AI52;Q80U87	A2AI52;Q80U87	6;6	6;6	6;6	Ubiquitin carboxyl-terminal hydrolase;Ubiquitin carboxyl-terminal hydrolase 8	Usp8	tr|A2AI52|A2AI52_MOUSE ubiquitinyl hydrolase 1 OS=Mus musculus OX=10090 GN=Usp8 PE=1 SV=1;sp|Q80U87|UBP8_MOUSE Ubiquitin carboxyl-terminal hydrolase 8 OS=Mus musculus OX=10090 GN=Usp8 PE=1 SV=2	2	6	6	6	0	0	0	1	1	0	5	4	5	0	0	0	1	1	0	5	4	5	0	0	0	1	1	0	5	4	5	8.2	8.2	8.2	123.89	1091	1091;1080	0	25.411	0	0	0
Q2PMX7;A2AI93;Q2PMX6	Q2PMX7;A2AI93;Q2PMX6	2;2;2	2;2;2	2;2;2		Dmrtc1b	tr|Q2PMX7|Q2PMX7_MOUSE DMRT-like family C1b OS=Mus musculus OX=10090 GN=Dmrtc1b PE=1 SV=1;tr|A2AI93|A2AI93_MOUSE DMRT-like family C1b OS=Mus musculus OX=10090 GN=Dmrtc1b PE=1 SV=1;tr|Q2PMX6|Q2PMX6_MOUSE DMRT-like family C1b OS=Mus musculus OX=10090 GN=Dmrt	3	2	2	2	0	0	0	2	1	2	0	0	0	0	0	0	2	1	2	0	0	0	0	0	0	2	1	2	0	0	0	19.3	19.3	19.3	22.04	202	202;241;267	0	9.6866	0	0	0
Q9JJR2;A2BI49;A2BI50;A2BI45;A2AIE6;A2BI46	Q9JJR2;A2BI49;A2BI50;A2BI45;A2AIE6;A2BI46	2;2;2;2;2;1	2;2;2;2;2;1	2;2;2;2;2;1		Xlr5c;Xlr5b;Xlr5a	sp|Q9JJR2|XLR5C_MOUSE X-linked lymphocyte-regulated protein 5C OS=Mus musculus OX=10090 GN=Xlr5c PE=1 SV=1;tr|A2BI49|A2BI49_MOUSE X-linked lymphocyte-regulated 5B (Fragment) OS=Mus musculus OX=10090 GN=Xlr5b PE=3 SV=1;tr|A2BI50|A2BI50_MOUSE X-linked lympho	6	2	2	2	0	0	0	0	0	0	2	2	2	0	0	0	0	0	0	2	2	2	0	0	0	0	0	0	2	2	2	14	14	14	20.702	179	179;198;236;236;236;203	0	3.6763	0	0	0
E9PZY8;A2AIV2	E9PZY8;A2AIV2	8;8	8;8	8;8	Protein virilizer homolog	1110037F02Rik;Kiaa1429	tr|E9PZY8|E9PZY8_MOUSE Vir like m6A methyltransferase associated OS=Mus musculus OX=10090 GN=Virma PE=1 SV=1;sp|A2AIV2|VIR_MOUSE Protein virilizer homolog OS=Mus musculus OX=10090 GN=Virma PE=1 SV=1	2	8	8	8	0	0	0	0	0	0	6	8	7	0	0	0	0	0	0	6	8	7	0	0	0	0	0	0	6	8	7	5.4	5.4	5.4	207.17	1861	1861;1811	0	46.984	0	0	0
A2AJ72;Q3TIX6;A0A0A6YVV5;A0A0A6YY39;F7AM43;A0A0A6YX76;A2AJ71	A2AJ72;Q3TIX6;A0A0A6YVV5	15;15;9;4;4;3;3	12;12;7;4;4;3;3	12;12;7;4;4;3;3		Fubp3	tr|A2AJ72|A2AJ72_MOUSE Far upstream element (FUSE) binding protein 3 OS=Mus musculus OX=10090 GN=Fubp3 PE=1 SV=1;tr|Q3TIX6|Q3TIX6_MOUSE Far upstream element (FUSE) binding protein 3 OS=Mus musculus OX=10090 GN=Fubp3 PE=1 SV=1;tr|A0A0A6YVV5|A0A0A6YVV5_MOUSE	7	15	12	12	0	0	0	11	11	11	12	12	11	0	0	0	8	8	8	9	9	8	0	0	0	8	8	8	9	9	8	30.6	27.1	27.1	61.447	569	569;575;191;123;264;83;97	0	41.24	0	0	0
E9PYJ6;A2AKG8	E9PYJ6;A2AKG8	3;3	3;3	3;3	Focadhesin	Focad	tr|E9PYJ6|E9PYJ6_MOUSE Focadhesin OS=Mus musculus OX=10090 GN=Focad PE=1 SV=1;sp|A2AKG8|FOCAD_MOUSE Focadhesin OS=Mus musculus OX=10090 GN=Focad PE=1 SV=1	2	3	3	3	0	0	0	0	0	0	2	1	2	0	0	0	0	0	0	2	1	2	0	0	0	0	0	0	2	1	2	1.8	1.8	1.8	189.56	1712	1712;1798	0	3.9406	0	0	0
A2AKN9;A2BIM8;P02762;P04938;A9C497;A9C496;A2CEL0;B5X0G2;L7MUC7;A2CEK6;E9QA79;A2BIN0;L7N222;P11591	A2AKN9;A2BIM8;P02762;P04938;A9C497;A9C496;A2CEL0;B5X0G2;L7MUC7;A2CEK6;E9QA79;A2BIN0	10;10;10;10;8;8;7;7;6;6;6;5;4;1	10;10;10;10;8;8;7;7;6;6;6;5;4;1	0;0;0;0;0;0;0;0;0;0;0;0;0;0	Major urinary protein 6;Major urinary proteins 11 and 8;Major urinary protein 17	Mup4;Mup9;Mup6;Mup8;Mup19;Mup1;Mup17;Mup7;Mup13;Mup11	tr|A2AKN9|A2AKN9_MOUSE Major urinary protein 2 OS=Mus musculus OX=10090 GN=Mup2 PE=1 SV=1;sp|A2BIM8|MUP18_MOUSE Major urinary protein 18 OS=Mus musculus OX=10090 GN=Mup18 PE=3 SV=1;sp|P02762|MUP6_MOUSE Major urinary protein 6 OS=Mus musculus OX=10090 GN=Mu	14	10	10	0	8	8	8	6	6	6	6	4	6	8	8	8	6	6	6	6	4	6	0	0	0	0	0	0	0	0	0	65.6	65.6	0	20.648	180	180;181;180;181;187;235;235;180;171;180;235;94;235;180	0	64.199	54.4	60	60
A2AKQ8;Q9CY00	A2AKQ8;Q9CY00	5;4	5;4	1;0	Tetratricopeptide repeat protein 30A2;Tetratricopeptide repeat protein 30B	Ttc30a2;Ttc30b	sp|A2AKQ8|I70A2_MOUSE Intraflagellar transport protein 70A2 OS=Mus musculus OX=10090 GN=Ift70a2 PE=1 SV=1;sp|Q9CY00|IT70B_MOUSE Intraflagellar transport protein 70B OS=Mus musculus OX=10090 GN=Ift70b PE=1 SV=1	2	5	5	1	0	0	0	1	2	2	5	4	4	0	0	0	1	2	2	5	4	4	0	0	0	1	1	1	1	1	1	8.4	8.4	2	76.119	664	664;664	0	28.71	0	0	0
Q8BG05;A2AL12;A2AL13	Q8BG05;A2AL12	33;33;4	33;33;4	32;32;4	Heterogeneous nuclear ribonucleoprotein A3	Hnrnpa3	sp|Q8BG05|ROA3_MOUSE Heterogeneous nuclear ribonucleoprotein A3 OS=Mus musculus OX=10090 GN=Hnrnpa3 PE=1 SV=1;tr|A2AL12|A2AL12_MOUSE Heterogeneous nuclear ribonucleoprotein A3 OS=Mus musculus OX=10090 GN=Hnrnpa3 PE=1 SV=1	3	33	33	32	1	3	2	29	26	27	30	31	28	1	3	2	29	26	27	30	31	28	1	3	2	28	26	26	30	31	28	59.9	59.9	57.5	39.652	379	379;318;194	0	323.31	5.5	7.1	3.7
Q8CBM2;A2AL85;Q8BSY0	Q8CBM2;A2AL85;Q8BSY0	8;8;8	8;8;8	8;8;8	Aspartyl/asparaginyl beta-hydroxylase	Asph	tr|Q8CBM2|Q8CBM2_MOUSE Aspartate-beta-hydroxylase OS=Mus musculus OX=10090 GN=Asph PE=1 SV=1;tr|A2AL85|A2AL85_MOUSE Aspartate-beta-hydroxylase OS=Mus musculus OX=10090 GN=Asph PE=1 SV=1;sp|Q8BSY0|ASPH_MOUSE Aspartyl/asparaginyl beta-hydroxylase OS=Mus musc	3	8	8	8	0	0	0	1	1	1	6	5	7	0	0	0	1	1	1	6	5	7	0	0	0	1	1	1	6	5	7	15.2	15.2	15.2	75.127	658	658;725;741	0	32.674	0	0	0
A2ALA0;P70279	A2ALA0;P70279	1;1	1;1	1;1	Surfeit locus protein 6	Surf6	tr|A2ALA0|A2ALA0_MOUSE Surfeit gene 6 OS=Mus musculus OX=10090 GN=Surf6 PE=1 SV=1;sp|P70279|SURF6_MOUSE Surfeit locus protein 6 OS=Mus musculus OX=10090 GN=Surf6 PE=1 SV=1	2	1	1	1	0	1	0	1	0	1	1	1	1	0	1	0	1	0	1	1	1	1	0	1	0	1	0	1	1	1	1	4.8	4.8	4.8	23.514	208	208;355	0.0013146	2.2639	0	4.8	0
A2ALK8	A2ALK8	1	1	1	Tyrosine-protein phosphatase non-receptor type 3	Ptpn3	sp|A2ALK8|PTN3_MOUSE Tyrosine-protein phosphatase non-receptor type 3 OS=Mus musculus OX=10090 GN=Ptpn3 PE=1 SV=1	1	1	1	1	0	0	0	0	0	1	0	0	1	0	0	0	0	0	1	0	0	1	0	0	0	0	0	1	0	0	1	1.3	1.3	1.3	103.89	913	913	1	-2	0	0	0
D6RCI7;A2AMV1;Q9D0I8	D6RCI7;A2AMV1;Q9D0I8	1;1;1	1;1;1	1;1;1	mRNA turnover protein 4 homolog	Mrto4	tr|D6RCI7|D6RCI7_MOUSE mRNA turnover 4, ribosome maturation factor (Fragment) OS=Mus musculus OX=10090 GN=Mrto4 PE=1 SV=2;tr|A2AMV1|A2AMV1_MOUSE Ribosome assembly factor mrt4 OS=Mus musculus OX=10090 GN=Mrto4 PE=1 SV=1;sp|Q9D0I8|MRT4_MOUSE mRNA turnover pr	3	1	1	1	0	0	0	0	0	0	1	1	1	0	0	0	0	0	0	1	1	1	0	0	0	0	0	0	1	1	1	16.4	16.4	16.4	7.1663	61	61;238;239	0.002158	2.1565	0	0	0
A2AMY5;Q91VX2;A2AMY7;F6PYV5	A2AMY5;Q91VX2	15;15;3;3	15;15;3;3	15;15;3;3	Ubiquitin-associated protein 2	Ubap2	tr|A2AMY5|A2AMY5_MOUSE Ubiquitin-associated protein 2 OS=Mus musculus OX=10090 GN=Ubap2 PE=1 SV=1;sp|Q91VX2|UBAP2_MOUSE Ubiquitin-associated protein 2 OS=Mus musculus OX=10090 GN=Ubap2 PE=1 SV=1	4	15	15	15	0	1	0	1	1	1	13	10	12	0	1	0	1	1	1	13	10	12	0	1	0	1	1	1	13	10	12	25.6	25.6	25.6	117.83	1131	1131;1132;227;245	0	134.41	0	1.3	0
A2AN08;Z4YMA7;F6SSP6	A2AN08;Z4YMA7	3;2;1	3;2;1	3;2;1	E3 ubiquitin-protein ligase UBR4	Ubr4	sp|A2AN08|UBR4_MOUSE E3 ubiquitin-protein ligase UBR4 OS=Mus musculus OX=10090 GN=Ubr4 PE=1 SV=1;tr|Z4YMA7|Z4YMA7_MOUSE Ubiquitin protein ligase E3 component n-recognin 4 (Fragment) OS=Mus musculus OX=10090 GN=Ubr4 PE=1 SV=1	3	3	3	3	0	1	0	1	1	1	0	0	0	0	1	0	1	1	1	0	0	0	0	1	0	1	1	1	0	0	0	0.7	0.7	0.7	572.28	5180	5180;1301;2065	0.0009009	2.4473	0	0.2	0
J3QMC5;A2ANY6	J3QMC5;A2ANY6	4;4	4;4	4;4		Mdn1	tr|J3QMC5|J3QMC5_MOUSE Midasin OS=Mus musculus OX=10090 GN=Mdn1 PE=1 SV=1;tr|A2ANY6|A2ANY6_MOUSE Midasin OS=Mus musculus OX=10090 GN=Mdn1 PE=1 SV=1	2	4	4	4	0	1	0	1	0	0	1	0	1	0	1	0	1	0	0	1	0	1	0	1	0	1	0	0	1	0	1	0.9	0.9	0.9	629.58	5582	5582;5589	0.002157	2.15	0	0.3	0
A2AP32;Q3UIU2	A2AP32;Q3UIU2	3;3	3;3	3;3	NADH dehydrogenase [ubiquinone] 1 beta subcomplex subunit 6	Ndufb6	tr|A2AP32|A2AP32_MOUSE NADH dehydrogenase [ubiquinone] 1 beta subcomplex subunit 6 OS=Mus musculus OX=10090 GN=Ndufb6 PE=1 SV=1;sp|Q3UIU2|NDUB6_MOUSE NADH dehydrogenase [ubiquinone] 1 beta subcomplex subunit 6 OS=Mus musculus OX=10090 GN=Ndufb6 PE=1 SV=3	2	3	3	3	0	0	0	1	0	0	1	3	2	0	0	0	1	0	0	1	3	2	0	0	0	1	0	0	1	3	2	27.8	27.8	27.8	11.741	97	97;128	0	4.1161	0	0	0
A2AP78;O54879	A2AP78;O54879	6;6	6;6	6;6	High mobility group protein B3	Hmgb3	tr|A2AP78|A2AP78_MOUSE High mobility group box 3 (Fragment) OS=Mus musculus OX=10090 GN=Hmgb3 PE=1 SV=1;sp|O54879|HMGB3_MOUSE High mobility group protein B3 OS=Mus musculus OX=10090 GN=Hmgb3 PE=1 SV=3	2	6	6	6	0	0	0	0	0	0	4	4	4	0	0	0	0	0	0	4	4	4	0	0	0	0	0	0	4	4	4	35.2	35.2	35.2	18.311	159	159;200	0	22.711	0	0	0
A2APB8	A2APB8	11	11	11	Targeting protein for Xklp2	Tpx2	sp|A2APB8|TPX2_MOUSE Targeting protein for Xklp2 OS=Mus musculus OX=10090 GN=Tpx2 PE=1 SV=1	1	11	11	11	0	0	0	10	5	4	2	6	2	0	0	0	10	5	4	2	6	2	0	0	0	10	5	4	2	6	2	16.9	16.9	16.9	85.893	745	745	0	23.476	0	0	0
D3Z7A7;E9PXE6;F8VPR2;A2AQW2;Q6ZPF4;A2APV2	D3Z7A7;E9PXE6;F8VPR2;A2AQW2;Q6ZPF4;A2APV2	1;1;1;1;1;1	1;1;1;1;1;1	1;1;1;1;1;1	Formin-like protein 3;Formin-like protein 2	Fmnl3;Fmnl2	tr|D3Z7A7|D3Z7A7_MOUSE Formin-like 3 OS=Mus musculus OX=10090 GN=Fmnl3 PE=1 SV=1;tr|E9PXE6|E9PXE6_MOUSE Formin-like 2 OS=Mus musculus OX=10090 GN=Fmnl2 PE=1 SV=2;tr|F8VPR2|F8VPR2_MOUSE Formin-like 2 OS=Mus musculus OX=10090 GN=Fmnl2 PE=1 SV=1;tr|A2AQW2|A2A	6	1	1	1	1	1	1	1	1	1	1	0	1	1	1	1	1	1	1	1	0	1	1	1	1	1	1	1	1	0	1	1.3	1.3	1.3	116.92	1027	1027;1034;1083;1085;1028;1086	0.0034217	2.0751	1.3	1.3	1.3
A2AQA7;Q8CFQ3	A2AQA7;Q8CFQ3	31;31	31;31	31;31	Intron-binding protein aquarius	Aqr	tr|A2AQA7|A2AQA7_MOUSE RNA helicase aquarius OS=Mus musculus OX=10090 GN=Aqr PE=1 SV=1;sp|Q8CFQ3|AQR_MOUSE RNA helicase aquarius OS=Mus musculus OX=10090 GN=Aqr PE=1 SV=2	2	31	31	31	0	0	0	14	17	14	16	24	22	0	0	0	14	17	14	16	24	22	0	0	0	14	17	14	16	24	22	27.7	27.7	27.7	161.85	1400	1400;1481	0	134.05	0	0	0
A2AR02;A2AR01	A2AR02;A2AR01	3;2	3;2	3;2	Peptidyl-prolyl cis-trans isomerase G;Peptidyl-prolyl cis-trans isomerase	Ppig	sp|A2AR02|PPIG_MOUSE Peptidyl-prolyl cis-trans isomerase G OS=Mus musculus OX=10090 GN=Ppig PE=1 SV=1;tr|A2AR01|A2AR01_MOUSE Peptidyl-prolyl cis-trans isomerase (Fragment) OS=Mus musculus OX=10090 GN=Ppig PE=1 SV=1	2	3	3	3	0	0	0	0	0	0	2	2	2	0	0	0	0	0	0	2	2	2	0	0	0	0	0	0	2	2	2	5.2	5.2	5.2	88.324	752	752;127	0	10.452	0	0	0
A2ARI0;Q8C0L0	A2ARI0;Q8C0L0	1;1	1;1	1;1	Thioredoxin-related transmembrane protein 4	Tmx4	tr|A2ARI0|A2ARI0_MOUSE Thioredoxin-related transmembrane protein 4 OS=Mus musculus OX=10090 GN=Tmx4 PE=1 SV=1;sp|Q8C0L0|TMX4_MOUSE Thioredoxin-related transmembrane protein 4 OS=Mus musculus OX=10090 GN=Tmx4 PE=1 SV=2	2	1	1	1	0	1	0	0	1	0	0	0	0	0	1	0	0	1	0	0	0	0	0	1	0	0	1	0	0	0	0	7.1	7.1	7.1	20.522	183	183;335	0.0033684	1.9238	0	7.1	0
A2ARZ3	A2ARZ3	2	2	2	Fibrous sheath-interacting protein 2	Fsip2	sp|A2ARZ3|FSIP2_MOUSE Fibrous sheath-interacting protein 2 OS=Mus musculus OX=10090 GN=Fsip2 PE=1 SV=3	1	2	2	2	0	0	0	1	0	0	0	0	1	0	0	0	1	0	0	0	0	1	0	0	0	1	0	0	0	0	1	0.5	0.5	0.5	784.85	6995	6995	0.004878	1.7199	0	0	0
A2ASY0;Q5HZG4	A2ASY0;Q5HZG4	1;1	1;1	1;1	Transcription initiation factor TFIID subunit 3	Taf3	tr|A2ASY0|A2ASY0_MOUSE TATA-box binding protein associated factor 3 OS=Mus musculus OX=10090 GN=Taf3 PE=1 SV=1;sp|Q5HZG4|TAF3_MOUSE Transcription initiation factor TFIID subunit 3 OS=Mus musculus OX=10090 GN=Taf3 PE=1 SV=2	2	1	1	1	0	0	0	0	0	0	1	1	1	0	0	0	0	0	0	1	1	1	0	0	0	0	0	0	1	1	1	2.1	2.1	2.1	87.867	779	779;932	0.00089445	2.4019	0	0	0
A2AT37;F6Q3G7	A2AT37	12;4	12;4	12;4		Upf2	sp|A2AT37|RENT2_MOUSE Regulator of nonsense transcripts 2 OS=Mus musculus OX=10090 GN=Upf2 PE=1 SV=1	2	12	12	12	0	1	0	5	4	5	7	10	8	0	1	0	5	4	5	7	10	8	0	1	0	5	4	5	7	10	8	11.1	11.1	11.1	147.55	1269	1269;523	0	36.111	0	0.6	0
A2AU61;A2AU60;A2AU62;Q64012	A2AU61;A2AU60;A2AU62;Q64012	8;7;7;7	8;7;7;7	8;7;7;7	RNA-binding protein Raly	Raly	tr|A2AU61|A2AU61_MOUSE HnRNP-associated with lethal yellow (Fragment) OS=Mus musculus OX=10090 GN=Raly PE=1 SV=1;tr|A2AU60|A2AU60_MOUSE HnRNP-associated with lethal yellow (Fragment) OS=Mus musculus OX=10090 GN=Raly PE=1 SV=1;tr|A2AU62|A2AU62_MOUSE HnRNP-a	4	8	8	8	0	0	0	6	4	6	3	3	5	0	0	0	6	4	6	3	3	5	0	0	0	6	4	6	3	3	5	39.8	39.8	39.8	23.12	211	211;141;298;312	0	15.207	0	0	0
A2AU71;A2AU72	A2AU71;A2AU72	1;1	1;1	1;1	Armadillo repeat-containing protein 3	Armc3	tr|A2AU71|A2AU71_MOUSE Armadillo repeat containing 3 OS=Mus musculus OX=10090 GN=Armc3 PE=1 SV=1;sp|A2AU72|ARMC3_MOUSE Armadillo repeat-containing protein 3 OS=Mus musculus OX=10090 GN=Armc3 PE=1 SV=1	2	1	1	1	1	1	1	1	1	1	1	1	1	1	1	1	1	1	1	1	1	1	1	1	1	1	1	1	1	1	1	1.4	1.4	1.4	96.015	869	869;881	0	5.4364	1.4	1.4	1.4
A2AUR7;Q9D031;Q01730	A2AUR7;Q9D031;Q01730	2;2;2	2;2;2	2;2;2	Ras suppressor protein 1	Rsu1	tr|A2AUR7|A2AUR7_MOUSE Ras suppressor protein 1 OS=Mus musculus OX=10090 GN=Rsu1 PE=1 SV=1;tr|Q9D031|Q9D031_MOUSE Ras suppressor protein 1 OS=Mus musculus OX=10090 GN=Rsu1 PE=1 SV=1;sp|Q01730|RSU1_MOUSE Ras suppressor protein 1 OS=Mus musculus OX=10090 GN=	3	2	2	2	0	0	0	1	0	1	1	2	1	0	0	0	1	0	1	1	2	1	0	0	0	1	0	1	1	2	1	12.7	12.7	12.7	29.543	260	260;277;277	0	6.6196	0	0	0
A2AVJ7;Q99PL5	A2AVJ7;Q99PL5	87;86	87;86	87;86	Ribosome-binding protein 1	Rrbp1	tr|A2AVJ7|A2AVJ7_MOUSE Ribosome binding protein 1 OS=Mus musculus OX=10090 GN=Rrbp1 PE=1 SV=1;sp|Q99PL5|RRBP1_MOUSE Ribosome-binding protein 1 OS=Mus musculus OX=10090 GN=Rrbp1 PE=1 SV=2	2	87	87	87	1	0	1	2	3	1	83	78	77	1	0	1	2	3	1	83	78	77	1	0	1	2	3	1	83	78	77	50.9	50.9	50.9	158.39	1464	1464;1605	0	323.31	1.1	0	0.7
A2AW05;Q08943	A2AW05;Q08943	3;3	3;3	3;3	FACT complex subunit SSRP1	Ssrp1	tr|A2AW05|A2AW05_MOUSE FACT complex subunit SSRP1 (Fragment) OS=Mus musculus OX=10090 GN=Ssrp1 PE=1 SV=1;sp|Q08943|SSRP1_MOUSE FACT complex subunit SSRP1 OS=Mus musculus OX=10090 GN=Ssrp1 PE=1 SV=2	2	3	3	3	0	0	0	0	0	0	2	0	1	0	0	0	0	0	0	2	0	1	0	0	0	0	0	0	2	0	1	6.4	6.4	6.4	71.527	623	623;708	0	6.3042	0	0	0
B7ZDE0;A2AWF0;A2AWE9;P58389;F6Z6I0	B7ZDE0;A2AWF0;A2AWE9;P58389;F6Z6I0	2;2;2;2;1	2;2;2;2;1	2;2;2;2;1	Serine/threonine-protein phosphatase 2A activator	Ppp2r4	tr|B7ZDE0|B7ZDE0_MOUSE Serine/threonine-protein phosphatase 2A activator OS=Mus musculus OX=10090 GN=Ptpa PE=1 SV=1;tr|A2AWF0|A2AWF0_MOUSE Serine/threonine-protein phosphatase 2A activator OS=Mus musculus OX=10090 GN=Ptpa PE=1 SV=1;tr|A2AWE9|A2AWE9_MOUSE S	5	2	2	2	2	2	2	1	2	2	0	0	1	2	2	2	1	2	2	0	0	1	2	2	2	1	2	2	0	0	1	32.8	32.8	32.8	6.897	61	61;104;281;323;126	0	3.2155	32.8	32.8	32.8
A2AWN8;P59326	A2AWN8;P59326	5;5	2;2	1;1	YTH domain-containing family protein 1	Ythdf1	tr|A2AWN8|A2AWN8_MOUSE YTH domain-containing family protein OS=Mus musculus OX=10090 GN=Ythdf1 PE=1 SV=1;sp|P59326|YTHD1_MOUSE YTH domain-containing family protein 1 OS=Mus musculus OX=10090 GN=Ythdf1 PE=1 SV=1	2	5	2	1	1	0	0	2	2	3	4	5	5	0	0	0	1	1	2	2	2	2	0	0	0	1	0	1	1	1	1	9.4	3.9	1.7	63.899	586	586;559	0	5.2321	1.5	0	0
O70152;A2BDX2;F8WII3	O70152;A2BDX2;F8WII3	2;2;1	2;2;1	2;2;1	Dolichol-phosphate mannosyltransferase subunit 1	Dpm1	sp|O70152|DPM1_MOUSE Dolichol-phosphate mannosyltransferase subunit 1 OS=Mus musculus OX=10090 GN=Dpm1 PE=1 SV=1;tr|A2BDX2|A2BDX2_MOUSE Dolichol-phosphate mannosyltransferase subunit 1 OS=Mus musculus OX=10090 GN=Dpm1 PE=1 SV=1;tr|F8WII3|F8WII3_MOUSE Dolic	3	2	2	2	2	1	1	2	1	1	1	1	1	2	1	1	2	1	1	1	1	1	2	1	1	2	1	1	1	1	1	9.6	9.6	9.6	29.174	260	260;208;121	0	29.275	9.6	5.4	4.2
A2BFF8;Q3TPJ8;A2BFF5;A2BFF9;O88487;Q3TYJ3;D3Z0M6;O88485;D3Z258;A0A0N4SVS1	A2BFF8;Q3TPJ8;A2BFF5;A2BFF9;O88487;Q3TYJ3;D3Z0M6;O88485	3;3;3;3;3;2;2;2;1;1	3;3;3;3;3;2;2;2;1;1	3;3;3;3;3;2;2;2;1;1	Cytoplasmic dynein 1 intermediate chain 2;Cytoplasmic dynein 1 intermediate chain 1	Dync1i2;Dync1i1	tr|A2BFF8|A2BFF8_MOUSE Dynein cytoplasmic 1 intermediate chain 2 OS=Mus musculus OX=10090 GN=Dync1i2 PE=1 SV=1;tr|Q3TPJ8|Q3TPJ8_MOUSE Dynein cytoplasmic 1 intermediate chain 2 OS=Mus musculus OX=10090 GN=Dync1i2 PE=1 SV=1;tr|A2BFF5|A2BFF5_MOUSE Dynein cyto	10	3	3	3	2	1	1	3	0	2	3	3	3	2	1	1	3	0	2	3	3	3	2	1	1	3	0	2	3	3	3	6.7	6.7	6.7	68.265	611	611;632;637;638;612;617;645;628;91;114	0	19.394	5.4	2	3.4
A2BGI9;A2BGI8;Q9D868	A2BGI9;A2BGI8;Q9D868	2;2;2	2;2;2	2;2;2	Peptidyl-prolyl cis-trans isomerase;Peptidyl-prolyl cis-trans isomerase H	Ppih	tr|A2BGI9|A2BGI9_MOUSE Peptidyl-prolyl cis-trans isomerase OS=Mus musculus OX=10090 GN=Ppihl PE=1 SV=1;tr|A2BGI8|A2BGI8_MOUSE Peptidyl-prolyl cis-trans isomerase (Fragment) OS=Mus musculus OX=10090 GN=Ppih PE=1 SV=1;sp|Q9D868|PPIH_MOUSE Peptidyl-prolyl cis	3	2	2	2	0	0	0	0	0	1	1	2	1	0	0	0	0	0	1	1	2	1	0	0	0	0	0	1	1	2	1	8.2	8.2	8.2	14.496	134	134;158;188	0.0009058	2.4981	0	0	0
A2BIN1;Q4FZE8	A2BIN1;Q4FZE8	10;10	1;1	0;0		Mup10;Mup1	tr|A2BIN1|A2BIN1_MOUSE Major urinary protein 10 OS=Mus musculus OX=10090 GN=Mup10 PE=2 SV=1;tr|Q4FZE8|Q4FZE8_MOUSE Major urinary protein 1 OS=Mus musculus OX=10090 GN=Mup22 PE=2 SV=1	2	10	1	0	8	8	8	6	6	6	5	4	6	1	1	1	1	1	1	0	1	1	0	0	0	0	0	0	0	0	0	62.8	6.1	0	20.681	180	180;181	0	4.4872	51.7	57.2	57.2
A2CEK7;B8JI96;A2AKN8;E9PVW0	A2CEK7;B8JI96;A2AKN8;E9PVW0	10;9;9;7	1;1;1;1	1;1;1;1		Mup14;Mup8	tr|A2CEK7|A2CEK7_MOUSE Major urinary protein 12 OS=Mus musculus OX=10090 GN=Mup14 PE=3 SV=1;tr|B8JI96|B8JI96_MOUSE Major urinary protein 14 (Fragment) OS=Mus musculus OX=10090 GN=Mup14 PE=1 SV=1;tr|A2AKN8|A2AKN8_MOUSE Major urinary protein 5 OS=Mus musculu	4	10	1	1	8	8	8	5	5	5	5	3	5	1	1	1	0	0	0	0	0	0	1	1	1	0	0	0	0	0	0	61.7	5	5	20.668	180	180;150;180;235	0.004894	1.7382	50.6	56.1	56.1
A9R9W0;A2CEL1;P11588;Q58EV3;A2CEK9	A9R9W0;A2CEL1;P11588;Q58EV3	9;9;9;8;2	1;1;1;1;1	1;1;1;1;1	Major urinary protein 1	Mup15;Mup1	tr|A9R9W0|A9R9W0_MOUSE Major urinary protein 15 OS=Mus musculus OX=10090 GN=Mup15 PE=3 SV=1;tr|A2CEL1|A2CEL1_MOUSE Major urinary protein 1 OS=Mus musculus OX=10090 GN=Mup1 PE=3 SV=1;sp|P11588|MUP1_MOUSE Major urinary protein 1 OS=Mus musculus OX=10090 GN=M	5	9	1	1	7	7	7	6	6	6	5	3	4	1	1	1	1	1	1	0	0	0	1	1	1	1	1	1	0	0	0	61.7	8.9	8.9	20.647	180	180;180;180;180;30	0	3.1479	50.6	56.1	56.1
A2CG44;E9Q3M0;Q8BUN5;Q9JIW5;Q62432;A2CG45;F7BUP2;E9Q5P9;Q8C3Y6;P97454;P70340	A2CG44;E9Q3M0;Q8BUN5;Q9JIW5;Q62432;A2CG45;F7BUP2;E9Q5P9;Q8C3Y6;P97454;P70340	2;2;2;2;2;1;1;1;1;1;1	2;2;2;2;2;1;1;1;1;1;1	2;2;2;2;2;1;1;1;1;1;1	Mothers against decapentaplegic homolog;Mothers against decapentaplegic homolog 3;Mothers against decapentaplegic homolog 9;Mothers against decapentaplegic homolog 2;Mothers against decapentaplegic homolog 5;Mothers against decapentaplegic homolog 1	Smad3;Smad2;Smad9;Smad1;Smad5	tr|A2CG44|A2CG44_MOUSE Mothers against decapentaplegic homolog (Fragment) OS=Mus musculus OX=10090 GN=Smad3 PE=1 SV=1;tr|E9Q3M0|E9Q3M0_MOUSE Mothers against decapentaplegic homolog OS=Mus musculus OX=10090 GN=Smad2 PE=1 SV=1;sp|Q8BUN5|SMAD3_MOUSE Mothers a	11	2	2	2	0	0	0	0	1	0	2	1	2	0	0	0	0	1	0	2	1	2	0	0	0	0	1	0	2	1	2	10.3	10.3	10.3	26.549	233	233;434;425;430;467;113;143;244;428;465;465	0	3.1893	0	0	0
M0QWF4;A2RSE7;P70281;M0QW86	M0QWF4;A2RSE7;P70281	6;6;6;2	6;6;6;2	6;6;6;2	Synaptonemal complex protein 3	Sycp3	tr|M0QWF4|M0QWF4_MOUSE Synaptonemal complex protein 3 OS=Mus musculus OX=10090 GN=Sycp3 PE=1 SV=1;tr|A2RSE7|A2RSE7_MOUSE Synaptonemal complex protein 3 OS=Mus musculus OX=10090 GN=Sycp3 PE=1 SV=1;sp|P70281|SYCP3_MOUSE Synaptonemal complex protein 3 OS=Mus	4	6	6	6	3	3	2	3	4	3	6	6	6	3	3	2	3	4	3	6	6	6	3	3	2	3	4	3	6	6	6	26.6	26.6	26.6	28.57	248	248;254;254;108	0	81.417	20.6	14.9	10.5
A3KFU5;Q6PHQ9;Q91YZ8;A3KFU8;V9GXG3;A0A0A6YWT2;G5E8X2	A3KFU5;Q6PHQ9;Q91YZ8;A3KFU8	30;30;29;29;13;2;2	13;13;12;12;3;0;0	13;13;12;12;3;0;0	Polyadenylate-binding protein	Pabpc4	tr|A3KFU5|A3KFU5_MOUSE Polyadenylate-binding protein OS=Mus musculus OX=10090 GN=Pabpc4 PE=1 SV=1;tr|Q6PHQ9|Q6PHQ9_MOUSE Polyadenylate-binding protein OS=Mus musculus OX=10090 GN=Pabpc4 PE=1 SV=1;tr|Q91YZ8|Q91YZ8_MOUSE Polyadenylate-binding protein OS=Mus	7	30	13	13	8	9	8	17	15	15	30	30	28	0	0	0	4	2	3	13	13	12	0	0	0	4	2	3	13	13	12	47.5	26.6	26.6	69.43	631	631;660;615;644;168;172;370	0	61.893	11.1	12.4	11.1
G8JL40;A3KG93;Q6ZQ88;F6Z4I3	G8JL40;A3KG93;Q6ZQ88	4;4;4;1	4;4;4;1	4;4;4;1	Lysine-specific histone demethylase 1A	Kdm1a	tr|G8JL40|G8JL40_MOUSE Lysine (K)-specific demethylase 1A (Fragment) OS=Mus musculus OX=10090 GN=Kdm1a PE=1 SV=1;tr|A3KG93|A3KG93_MOUSE Lysine-specific histone demethylase OS=Mus musculus OX=10090 GN=Kdm1a PE=1 SV=1;sp|Q6ZQ88|KDM1A_MOUSE Lysine-specific hi	4	4	4	4	0	0	0	0	0	0	1	4	2	0	0	0	0	0	0	1	4	2	0	0	0	0	0	0	1	4	2	7.9	7.9	7.9	75.422	683	683;873;853;322	0	6.9297	0	0	0
A3KGL9;B7ZCQ3;F6W687;P09602;Q5XK38	A3KGL9;B7ZCQ3;F6W687;P09602;Q5XK38	2;2;2;2;1	2;2;2;2;1	2;2;2;2;1	Non-histone chromosomal protein HMG-17	Hmgn2	tr|A3KGL9|A3KGL9_MOUSE High mobility group nucleosomal binding domain 2 OS=Mus musculus OX=10090 GN=Hmgn2 PE=1 SV=1;tr|B7ZCQ3|B7ZCQ3_MOUSE High mobility group nucleosomal binding domain 2 OS=Mus musculus OX=10090 GN=Hmgn2 PE=1 SV=1;tr|F6W687|F6W687_MOUSE H	5	2	2	2	0	0	0	0	1	1	2	2	2	0	0	0	0	1	1	2	2	2	0	0	0	0	1	1	2	2	2	15.6	15.6	15.6	9.7258	96	96;109;112;90;92	0	2.8064	0	0	0
A3KGU5;A3KGU7;E9Q447;A3KGU9;P16546;A3KGU4	A3KGU5;A3KGU7;E9Q447;A3KGU9;P16546	12;12;12;12;12;1	12;12;12;12;12;1	12;12;12;12;12;1	Spectrin alpha chain, non-erythrocytic 1	Sptan1	tr|A3KGU5|A3KGU5_MOUSE Spectrin alpha, non-erythrocytic 1 OS=Mus musculus OX=10090 GN=Sptan1 PE=1 SV=1;tr|A3KGU7|A3KGU7_MOUSE Spectrin alpha, non-erythrocytic 1 OS=Mus musculus OX=10090 GN=Sptan1 PE=1 SV=1;tr|E9Q447|E9Q447_MOUSE Spectrin alpha, non-erythro	6	12	12	12	8	8	5	2	2	1	7	8	6	8	8	5	2	2	1	7	8	6	8	8	5	2	2	1	7	8	6	6.5	6.5	6.5	282.89	2457	2457;2477;2478;2498;2472;219	0	38.091	4.2	4.7	2.8
A3KGV9;A3KGW0;A3KGV1;V9GXZ0;F6Y325;A3KGV3	A3KGV9;A3KGW0;A3KGV1;V9GXZ0	34;34;34;33;12;2	34;34;34;33;12;2	34;34;34;33;12;2	Outer dense fiber protein 2	Odf2	tr|A3KGV9|A3KGV9_MOUSE Outer dense fiber of sperm tails 2 OS=Mus musculus OX=10090 GN=Odf2 PE=1 SV=1;tr|A3KGW0|A3KGW0_MOUSE Outer dense fiber of sperm tails 2 OS=Mus musculus OX=10090 GN=Odf2 PE=1 SV=1;sp|A3KGV1|ODFP2_MOUSE Outer dense fiber protein 2 OS=M	6	34	34	34	14	12	12	23	22	24	29	26	27	14	12	12	23	22	24	29	26	27	14	12	12	23	22	24	29	26	27	50.8	50.8	50.8	75.522	657	657;701;830;680;271;138	0	323.31	18.6	16.4	18.9
V9GXB7;B1ASM0;V9GXT8;A4Q9F3	V9GXB7;B1ASM0;V9GXT8;A4Q9F3	4;4;4;4	4;4;4;4	4;4;4;4	Protein polyglycylase TTLL10	Ttll10	tr|V9GXB7|V9GXB7_MOUSE Tubulin tyrosine ligase-like family, member 10 (Fragment) OS=Mus musculus OX=10090 GN=Ttll10 PE=1 SV=1;tr|B1ASM0|B1ASM0_MOUSE Tubulin tyrosine ligase-like family, member 10 OS=Mus musculus OX=10090 GN=Ttll10 PE=1 SV=1;tr|V9GXT8|V9GXT	4	4	4	4	0	0	0	1	1	0	3	2	4	0	0	0	1	1	0	3	2	4	0	0	0	1	1	0	3	2	4	9.4	9.4	9.4	52.834	458	458;675;704;704	0	6.3496	0	0	0
A6H630;D6RG65	A6H630;D6RG65	2;1	2;1	2;1	Protein-glutamate O-methyltransferase	Armt1;1700052N19Rik	sp|A6H630|ARMT1_MOUSE Damage-control phosphatase ARMT1 OS=Mus musculus OX=10090 GN=Armt1 PE=1 SV=1;tr|D6RG65|D6RG65_MOUSE Acidic residue methyltransferase 1 OS=Mus musculus OX=10090 GN=Armt1 PE=1 SV=1	2	2	2	2	2	2	1	0	0	0	0	0	0	2	2	1	0	0	0	0	0	0	2	2	1	0	0	0	0	0	0	3.2	3.2	3.2	50.548	439	439;53	0.0034101	2.0508	3.2	3.2	1.6
A6H656;Q61999	A6H656;Q61999	6;6	6;6	6;6	Outer dense fiber protein 1	Odf1	tr|A6H656|A6H656_MOUSE Outer dense fiber protein 1 OS=Mus musculus OX=10090 GN=Odf1 PE=1 SV=1;sp|Q61999|ODFP1_MOUSE Outer dense fiber protein 1 OS=Mus musculus OX=10090 GN=Odf1 PE=2 SV=1	2	6	6	6	2	2	2	4	3	3	6	4	4	2	2	2	4	3	3	6	4	4	2	2	2	4	3	3	6	4	4	21	21	21	27.622	248	248;247	0	45.672	8.1	6.9	8.5
A6H690;A0A0G2JE43;A0A0G2JEV3	A6H690;A0A0G2JE43	5;3;1	5;3;1	5;3;1	IQ and AAA domain-containing protein 1-like	Iqca1l	sp|A6H690|IQCAL_MOUSE IQ and AAA domain-containing protein 1-like OS=Mus musculus OX=10090 GN=Iqca1l PE=1 SV=3;tr|A0A0G2JE43|A0A0G2JE43_MOUSE IQ motif containing with AAA domain 1 like OS=Mus musculus OX=10090 GN=Iqca1l PE=1 SV=1	3	5	5	5	2	1	3	2	2	1	4	3	5	2	1	3	2	2	1	4	3	5	2	1	3	2	2	1	4	3	5	7.2	7.2	7.2	95.955	825	825;239;154	0	10.547	2.8	1.5	4.2
A6PWD2	A6PWD2	2	2	2	Forkhead-associated domain-containing protein 1	Fhad1	sp|A6PWD2|FHAD1_MOUSE Forkhead-associated domain-containing protein 1 OS=Mus musculus OX=10090 GN=Fhad1 PE=2 SV=1	1	2	2	2	1	0	0	1	0	0	0	0	0	1	0	0	1	0	0	0	0	0	1	0	0	1	0	0	0	0	0	2	2	2	163.73	1420	1420	1	-2	1.1	0	0
A6PWS5	A6PWS5	4	1	1		Gsn	tr|A6PWS5|A6PWS5_MOUSE Gelsolin (Fragment) OS=Mus musculus OX=10090 GN=Gsn PE=1 SV=1	1	4	1	1	4	4	3	1	1	1	1	1	1	1	1	1	0	0	0	0	0	0	1	1	1	0	0	0	0	0	0	18.3	3.6	3.6	28.059	251	251	0.00491	1.7526	18.3	18.3	13.9
A6ZI44;P05064;D3YWI1;Q9CPQ9;D3Z510;A0A0U1RPN8;D3YV98;A0A0U1RPT5;P05063	A6ZI44;P05064;D3YWI1;Q9CPQ9;D3Z510;A0A0U1RPN8;D3YV98;A0A0U1RPT5	23;23;15;15;13;13;12;12;2	23;23;15;15;13;13;12;12;2	3;3;2;0;1;1;0;0;1	Fructose-bisphosphate aldolase;Fructose-bisphosphate aldolase A	Aldoa;Aldoart1	tr|A6ZI44|A6ZI44_MOUSE Fructose-bisphosphate aldolase OS=Mus musculus OX=10090 GN=Aldoa PE=1 SV=1;sp|P05064|ALDOA_MOUSE Fructose-bisphosphate aldolase A OS=Mus musculus OX=10090 GN=Aldoa PE=1 SV=2;tr|D3YWI1|D3YWI1_MOUSE Fructose-bisphosphate aldolase (Frag	9	23	23	3	9	11	9	14	17	17	18	19	17	9	11	9	14	17	17	18	19	17	0	1	0	2	3	2	3	3	3	60.5	60.5	16.7	45.12	418	418;364;236;364;180;190;193;209;363	0	177.06	18.2	26.1	18.9
A6ZI47;Q91Y97	A6ZI47	18;1	6;0	6;0	Fructose-bisphosphate aldolase	Aldoart2	tr|A6ZI47|A6ZI47_MOUSE Fructose-bisphosphate aldolase OS=Mus musculus OX=10090 GN=Aldoart2 PE=1 SV=1	2	18	6	6	9	9	9	10	11	12	12	13	9	4	3	4	2	3	3	3	3	1	4	3	4	2	3	3	3	3	1	49.2	20.6	20.6	39.37	364	364;364	0	19.47	26.9	23.6	26.9
A7ISP9;F8WJ93;Q3UMY5;A0A0R4J0H0;A0A0R4J1G7;A0A3Q4EHV9	A7ISP9;F8WJ93;Q3UMY5;A0A0R4J0H0;A0A0R4J1G7;A0A3Q4EHV9	2;2;2;1;1;1	2;2;2;1;1;1	2;2;2;1;1;1	Echinoderm microtubule-associated protein-like 4	Eml4	tr|A7ISP9|A7ISP9_MOUSE EMAP-like protein 4 OS=Mus musculus OX=10090 GN=Eml4 PE=1 SV=1;tr|F8WJ93|F8WJ93_MOUSE Echinoderm microtubule associated protein like 4 OS=Mus musculus OX=10090 GN=Eml4 PE=1 SV=1;sp|Q3UMY5|EMAL4_MOUSE Echinoderm microtubule-associated	6	2	2	2	0	0	0	1	1	1	0	0	1	0	0	0	1	1	1	0	0	1	0	0	0	1	1	1	0	0	1	2.9	2.9	2.9	108.71	977	977;988;988;876;919;941	0	4.8766	0	0	0
Q9JL15;A8DIL0;Q8C6H0	Q9JL15;A8DIL0;Q8C6H0	3;3;2	3;3;2	3;3;2	Galectin-8;Galectin	Lgals8	sp|Q9JL15|LEG8_MOUSE Galectin-8 OS=Mus musculus OX=10090 GN=Lgals8 PE=1 SV=1;tr|A8DIL0|A8DIL0_MOUSE Galectin OS=Mus musculus OX=10090 GN=Lgals8 PE=1 SV=1;tr|Q8C6H0|Q8C6H0_MOUSE Galectin OS=Mus musculus OX=10090 GN=Lgals8 PE=1 SV=1	3	3	3	3	1	1	2	0	0	1	0	0	1	1	1	2	0	0	1	0	0	1	1	1	2	0	0	1	0	0	1	9.2	9.2	9.2	36.161	316	316;325;223	0.00092123	2.6181	2.8	2.8	6
A8DUK4;E9Q223;CON__Q3SX09;CON__P02070;P02104	A8DUK4;E9Q223	14;9;2;1;1	14;9;2;1;1	5;3;0;0;0		Hbbt1;Hbb-bs	tr|A8DUK4|A8DUK4_MOUSE Beta-globin OS=Mus musculus OX=10090 GN=Hbb-bs PE=1 SV=1;tr|E9Q223|E9Q223_MOUSE Hemoglobin, beta adult s chain (Fragment) OS=Mus musculus OX=10090 GN=Hbb-bs PE=1 SV=1	5	14	14	5	10	10	12	8	9	10	6	6	6	10	10	12	8	9	10	6	6	6	3	4	3	4	4	5	3	3	3	95.2	95.2	24.5	15.748	147	147;103;201;145;147	0	90.971	72.1	78.2	89.1
B0R1E3;P70349	B0R1E3;P70349	1;1	1;1	1;1	Histidine triad nucleotide-binding protein 1	Hint1	tr|B0R1E3|B0R1E3_MOUSE Histidine triad nucleotide binding protein 1 OS=Mus musculus OX=10090 GN=Hint1 PE=1 SV=1;sp|P70349|HINT1_MOUSE Adenosine 5-monophosphoramidase HINT1 OS=Mus musculus OX=10090 GN=Hint1 PE=1 SV=3	2	1	1	1	1	0	1	1	1	1	0	0	0	1	0	1	1	1	1	0	0	0	1	0	1	1	1	1	0	0	0	11.8	11.8	11.8	13.438	119	119;126	0	3.6577	11.8	0	11.8
Q3TET1;Q3UI47;B1AQZ2;P28741;B1AQZ5;E9PX57;P33174	Q3TET1;Q3UI47;B1AQZ2;P28741	3;3;3;3;1;1;1	3;3;3;3;1;1;1	3;3;3;3;1;1;1	Kinesin-like protein;Kinesin-like protein KIF3A	Kif3a	tr|Q3TET1|Q3TET1_MOUSE Kinesin-like protein OS=Mus musculus OX=10090 GN=Kif3a PE=1 SV=1;tr|Q3UI47|Q3UI47_MOUSE Kinesin-like protein OS=Mus musculus OX=10090 GN=Kif3a PE=1 SV=1;tr|B1AQZ2|B1AQZ2_MOUSE Kinesin-like protein OS=Mus musculus OX=10090 GN=Kif3a PE	7	3	3	3	0	1	1	1	1	0	2	2	3	0	1	1	1	1	0	2	2	3	0	1	1	1	1	0	2	2	3	5	5	5	79.444	694	694;698;725;701;185;802;1231	0	4.1544	0	1.6	1.6
B1ARW4;Q99LY9	B1ARW4;Q99LY9	1;1	1;1	1;1	NADH dehydrogenase [ubiquinone] iron-sulfur protein 5;NADH dehydrogenase [ubiquinone] iron-sulfur protein 5, N-terminally processed	Ndufs5	tr|B1ARW4|B1ARW4_MOUSE NADH dehydrogenase [ubiquinone] iron-sulfur protein 5 (Fragment) OS=Mus musculus OX=10090 GN=Ndufs5 PE=1 SV=1;sp|Q99LY9|NDUS5_MOUSE NADH dehydrogenase [ubiquinone] iron-sulfur protein 5 OS=Mus musculus OX=10090 GN=Ndufs5 PE=1 SV=3	2	1	1	1	0	0	0	0	0	0	0	0	1	0	0	0	0	0	0	0	0	1	0	0	0	0	0	0	0	0	1	13.2	13.2	13.2	10.909	91	91;106	0.0021589	2.1596	0	0	0
B1AT01	B1AT01	2	2	2		1700084M14Rik	tr|B1AT01|B1AT01_MOUSE RIKEN cDNA 1700084M14 gene OS=Mus musculus OX=10090 GN=1700084M14Rik PE=4 SV=1	1	2	2	2	0	1	0	1	1	0	2	2	1	0	1	0	1	1	0	2	2	1	0	1	0	1	1	0	2	2	1	24.4	24.4	24.4	8.8446	78	78	0	4.0044	0	24.4	0
B1AT82;Q9D0M1;B1AT84;A0A8V5KYQ3;B1AT83	B1AT82;Q9D0M1;B1AT84;A0A8V5KYQ3;B1AT83	8;8;6;4;4	8;8;6;4;4	7;7;5;4;4	Phosphoribosyl pyrophosphate synthase-associated protein 1	Prpsap1	tr|B1AT82|B1AT82_MOUSE Phosphoribosyl pyrophosphate synthetase-associated protein 1 OS=Mus musculus OX=10090 GN=Prpsap1 PE=1 SV=1;sp|Q9D0M1|KPRA_MOUSE Phosphoribosyl pyrophosphate synthase-associated protein 1 OS=Mus musculus OX=10090 GN=Prpsap1 PE=1 SV=1;	5	8	8	7	0	0	0	7	8	6	4	4	4	0	0	0	7	8	6	4	4	4	0	0	0	6	7	5	4	4	4	28.1	28.1	24.4	42.467	385	385;356;349;165;195	0	44.745	0	0	0
B1ATC3;B7ZC94;Q3UHC0	B1ATC3;B7ZC94;Q3UHC0	5;5;5	5;5;5	4;4;4	Trinucleotide repeat-containing gene 6C protein	Tnrc6c	tr|B1ATC3|B1ATC3_MOUSE Trinucleotide repeat containing 6C OS=Mus musculus OX=10090 GN=Tnrc6c PE=1 SV=1;tr|B7ZC94|B7ZC94_MOUSE Trinucleotide repeat containing 6C (Fragment) OS=Mus musculus OX=10090 GN=Tnrc6c PE=1 SV=1;sp|Q3UHC0|TNR6C_MOUSE Trinucleotide rep	3	5	5	4	0	0	0	1	3	3	3	4	4	0	0	0	1	3	3	3	4	4	0	0	0	0	2	2	2	3	3	3.2	3.2	2.6	198.21	1900	1900;1732;1690	0	15.059	0	0	0
B1AV77;B1ATI0;P47740;P47739	B1AV77;B1ATI0;P47740;P47739	2;2;2;1	2;2;2;1	2;2;2;1	Aldehyde dehydrogenase;Fatty aldehyde dehydrogenase;Aldehyde dehydrogenase, dimeric NADP-preferring	Aldh3a2;Aldh3a1	tr|B1AV77|B1AV77_MOUSE Aldehyde dehydrogenase OS=Mus musculus OX=10090 GN=Aldh3a2 PE=1 SV=1;tr|B1ATI0|B1ATI0_MOUSE Aldehyde dehydrogenase OS=Mus musculus OX=10090 GN=Aldh3a2 PE=1 SV=1;sp|P47740|AL3A2_MOUSE Aldehyde dehydrogenase family 3 member A2 OS=Mus m	4	2	2	2	0	0	0	0	1	2	0	1	1	0	0	0	0	1	2	0	1	1	0	0	0	0	1	2	0	1	1	5.5	5.5	5.5	54.33	487	487;532;484;453	0.00088889	2.3587	0	0	0
B1ATI9;Q3U432;F6QB26;Q60780	B1ATI9;Q3U432;F6QB26;Q60780	5;5;5;5	5;5;5;5	5;5;5;5	Growth arrest-specific protein 7	Gas7	tr|B1ATI9|B1ATI9_MOUSE Growth arrest specific 7 OS=Mus musculus OX=10090 GN=Gas7 PE=1 SV=1;tr|Q3U432|Q3U432_MOUSE Growth arrest specific 7 OS=Mus musculus OX=10090 GN=Gas7 PE=1 SV=1;tr|F6QB26|F6QB26_MOUSE Growth arrest specific 7 OS=Mus musculus OX=10090 G	4	5	5	5	0	0	0	0	0	0	5	5	4	0	0	0	0	0	0	5	5	4	0	0	0	0	0	0	5	5	4	15.8	15.8	15.8	47.261	412	412;416;476;421	0	11.731	0	0	0
B1ATL6;P47809	B1ATL6;P47809	1;1	1;1	1;1	Dual specificity mitogen-activated protein kinase kinase 4	Map2k4	tr|B1ATL6|B1ATL6_MOUSE Mitogen-activated protein kinase kinase 4 (Fragment) OS=Mus musculus OX=10090 GN=Map2k4 PE=1 SV=1;sp|P47809|MP2K4_MOUSE Dual specificity mitogen-activated protein kinase kinase 4 OS=Mus musculus OX=10090 GN=Map2k4 PE=1 SV=2	2	1	1	1	1	1	1	1	1	1	1	1	0	1	1	1	1	1	1	1	1	0	1	1	1	1	1	1	1	1	0	8.3	8.3	8.3	22.475	206	206;397	0	4.9448	8.3	8.3	8.3
B1AU25;Q9Z0X1	B1AU25;Q9Z0X1	5;5	5;5	5;5	Apoptosis-inducing factor 1, mitochondrial	Aifm1	tr|B1AU25|B1AU25_MOUSE Apoptosis-inducing factor, mitochondrion-associated 1 OS=Mus musculus OX=10090 GN=Aifm1 PE=1 SV=1;sp|Q9Z0X1|AIFM1_MOUSE Apoptosis-inducing factor 1, mitochondrial OS=Mus musculus OX=10090 GN=Aifm1 PE=1 SV=1	2	5	5	5	1	2	2	2	3	2	4	4	3	1	2	2	2	3	2	4	4	3	1	2	2	2	3	2	4	4	3	11.8	11.8	11.8	66.113	608	608;612	0	13.906	2.5	5.9	5.9
F2Z3Z6;Q8BLF2;B1AU43;B1AU42;F6RX76;E9Q341;A0A0G2JGW6;A0A0G2JF79;Q5FWX6;A0A0G2JFE2;F6ULF3;D3Z6I0;F6RBI5;F6RUB4;Q9QUK0;Q8BZ03;Q8K1Y2;Q8CEQ0;Q62101;Q3UTQ8;Q69ZM6	F2Z3Z6;Q8BLF2;B1AU43;B1AU42	6;6;6;3;1;1;1;1;1;1;1;1;1;1;1;1;1;1;1;1;1	6;6;6;3;1;1;1;1;1;1;1;1;1;1;1;1;1;1;1;1;1	6;6;6;3;1;1;1;1;1;1;1;1;1;1;1;1;1;1;1;1;1	Cyclin-dependent kinase-like 3	Cdkl3	tr|F2Z3Z6|F2Z3Z6_MOUSE Cyclin-dependent kinase-like 3 OS=Mus musculus OX=10090 GN=Cdkl3 PE=1 SV=1;sp|Q8BLF2|CDKL3_MOUSE Cyclin-dependent kinase-like 3 OS=Mus musculus OX=10090 GN=Cdkl3 PE=2 SV=2;tr|B1AU43|B1AU43_MOUSE Cyclin-dependent kinase-like 3 OS=Mus	21	6	6	6	0	0	0	3	3	4	4	5	3	0	0	0	3	3	4	4	5	3	0	0	0	3	3	4	4	5	3	13.9	13.9	13.9	67.396	591	591;595;610;192;80;1048;960;923;890;862;97;795;224;138;568;875;889;352;918;938;1316	0	26.57	0	0	0
Q99MD9;B1AU75;B1AU76	Q99MD9;B1AU75;B1AU76	6;6;4	6;6;4	6;6;4	Nuclear autoantigenic sperm protein	Nasp	sp|Q99MD9|NASP_MOUSE Nuclear autoantigenic sperm protein OS=Mus musculus OX=10090 GN=Nasp PE=1 SV=2;tr|B1AU75|B1AU75_MOUSE Nuclear autoantigenic sperm protein OS=Mus musculus OX=10090 GN=Nasp PE=1 SV=1;tr|B1AU76|B1AU76_MOUSE Nuclear autoantigenic sperm pro	3	6	6	6	5	4	3	2	4	3	0	0	0	5	4	3	2	4	3	0	0	0	5	4	3	2	4	3	0	0	0	7.8	7.8	7.8	83.953	773	773;773;448	0	7.447	6.1	5.6	4.3
Q61191;B1AUX2;F6SJS2	Q61191;B1AUX2	7;7;3	7;7;3	6;6;2	Host cell factor 1;HCF N-terminal chain 1;HCF N-terminal chain 2;HCF N-terminal chain 3;HCF N-terminal chain 4;HCF N-terminal chain 5;HCF N-terminal chain 6;HCF C-terminal chain 1;HCF C-terminal chain 2;HCF C-terminal chain 3;HCF C-terminal chain 4;HCF C-terminal chain 5;HCF C-terminal chain 6	Hcfc1	sp|Q61191|HCFC1_MOUSE Host cell factor 1 OS=Mus musculus OX=10090 GN=Hcfc1 PE=1 SV=2;tr|B1AUX2|B1AUX2_MOUSE Host cell factor C1 OS=Mus musculus OX=10090 GN=Hcfc1 PE=1 SV=1	3	7	7	6	0	0	0	2	2	2	5	5	3	0	0	0	2	2	2	5	5	3	0	0	0	2	2	2	5	4	3	4.3	4.3	3.8	210.43	2045	2045;2090;612	0	29.439	0	0	0
B1AVB2;B1AVB1;A0A571BDL9;Q8K214;A0A571BGE2	B1AVB2;B1AVB1	30;29;9;2;1	1;0;0;0;0	1;0;0;0;0		Scml2	tr|B1AVB2|B1AVB2_MOUSE Scm polycomb group protein like 2 OS=Mus musculus OX=10090 GN=Scml2 PE=1 SV=1;tr|B1AVB1|B1AVB1_MOUSE Scm polycomb group protein like 2 OS=Mus musculus OX=10090 GN=Scml2 PE=1 SV=1	5	30	1	1	0	0	0	5	5	5	21	27	25	0	0	0	0	0	0	1	1	1	0	0	0	0	0	0	1	1	1	45.8	2.2	2.2	90.153	827	827;825;367;706;130	0	21.855	0	0	0
B1AVB4;E9Q796;B1AVB5;B1AVB3	B1AVB4;E9Q796;B1AVB5;B1AVB3	34;34;34;32	34;34;34;32	5;5;5;5		Scml2	tr|B1AVB4|B1AVB4_MOUSE Scm polycomb group protein like 2 OS=Mus musculus OX=10090 GN=Scml2 PE=1 SV=1;tr|E9Q796|E9Q796_MOUSE Scm polycomb group protein like 2 OS=Mus musculus OX=10090 GN=Scml2 PE=1 SV=1;tr|B1AVB5|B1AVB5_MOUSE Scm polycomb group protein like	4	34	34	5	0	0	0	6	6	5	22	31	28	0	0	0	6	6	5	22	31	28	0	0	0	1	1	0	2	5	4	52	52	6.2	92.858	845	845;901;905;969	0	252.66	0	0	0
B1AX77;B1AX78;Q2TPA8	B1AX77;B1AX78;Q2TPA8	1;1;1	1;1;1	1;1;1	Hydroxysteroid dehydrogenase-like protein 2	Hsdl2	tr|B1AX77|B1AX77_MOUSE Hydroxysteroid dehydrogenase like 2 (Fragment) OS=Mus musculus OX=10090 GN=Hsdl2 PE=1 SV=1;tr|B1AX78|B1AX78_MOUSE Hydroxysteroid dehydrogenase like 2 OS=Mus musculus OX=10090 GN=Hsdl2 PE=1 SV=1;sp|Q2TPA8|HSDL2_MOUSE Hydroxysteroid de	3	1	1	1	0	0	0	0	0	0	1	1	1	0	0	0	0	0	0	1	1	1	0	0	0	0	0	0	1	1	1	12.8	12.8	12.8	16.437	149	149;370;490	0	3.0526	0	0	0
B1AXI9;J3QMP9;Q62036	B1AXI9;J3QMP9;Q62036	7;7;7	7;7;7	7;7;7	Centrosomal protein of 131 kDa	Cep131	tr|B1AXI9|B1AXI9_MOUSE 5-azacytidine induced gene 1 OS=Mus musculus OX=10090 GN=Cep131 PE=1 SV=1;tr|J3QMP9|J3QMP9_MOUSE Centrosomal protein 131 OS=Mus musculus OX=10090 GN=Cep131 PE=1 SV=1;sp|Q62036|CP131_MOUSE Centrosomal protein of 131 kDa OS=Mus musculu	3	7	7	7	1	0	1	4	3	4	5	4	6	1	0	1	4	3	4	5	4	6	1	0	1	4	3	4	5	4	6	8.6	8.6	8.6	120.23	1059	1059;1060;1060	0	45.328	1.7	0	1.7
B1AXW5;B1AXW6;P35700;B1AXW4	B1AXW5;B1AXW6;P35700;B1AXW4	11;11;11;6	11;11;11;6	11;11;11;6	Peroxiredoxin-1	Prdx1	tr|B1AXW5|B1AXW5_MOUSE Peroxiredoxin 1 (Fragment) OS=Mus musculus OX=10090 GN=Prdx1 PE=1 SV=8;tr|B1AXW6|B1AXW6_MOUSE Peroxiredoxin 1 (Fragment) OS=Mus musculus OX=10090 GN=Prdx1 PE=1 SV=1;sp|P35700|PRDX1_MOUSE Peroxiredoxin-1 OS=Mus musculus OX=10090 GN=Pr	4	11	11	11	3	4	3	6	6	5	8	6	9	3	4	3	6	6	5	8	6	9	3	4	3	6	6	5	8	6	9	55.6	55.6	55.6	18.87	169	169;176;199;123	0	28.248	16.6	26	16.6
B1AXZ0;Q80UJ0;Q3UR02;Q80Y51;B1AXZ6;B1AXZ4;B1AXZ5;Q60899;Q61701;H3BLG7;A2A9R4;A0A1L1SS95;Q60900;A2A9R5	B1AXZ0;Q80UJ0;Q3UR02;Q80Y51;B1AXZ6;B1AXZ4;B1AXZ5;Q60899;Q61701	9;9;9;9;9;9;9;9;6;3;3;2;2;1	8;8;8;8;8;8;8;8;5;3;3;2;2;1	8;8;8;8;8;8;8;8;5;3;3;2;2;1	ELAV-like protein;ELAV-like protein 2;ELAV-like protein 4	Elavl2;Elavl4	tr|B1AXZ0|B1AXZ0_MOUSE ELAV-like protein OS=Mus musculus OX=10090 GN=Elavl2 PE=1 SV=1;tr|Q80UJ0|Q80UJ0_MOUSE ELAV-like protein OS=Mus musculus OX=10090 GN=Elavl2 PE=1 SV=2;tr|Q3UR02|Q3UR02_MOUSE ELAV-like protein OS=Mus musculus OX=10090 GN=Elavl2 PE=1 SV=	14	9	8	8	0	0	0	4	5	5	4	4	3	0	0	0	3	4	4	3	3	2	0	0	0	3	4	4	3	3	2	29.5	26.9	26.9	38.001	346	346;347;359;373;376;388;389;360;385;125;137;250;367;94	0	38.235	0	0	0
B1AY10	B1AY10	6	6	6	Transcriptional repressor NF-X1	Nfx1	sp|B1AY10|NFX1_MOUSE Transcriptional repressor NF-X1 OS=Mus musculus OX=10090 GN=Nfx1 PE=1 SV=1	1	6	6	6	0	0	0	1	0	0	4	5	4	0	0	0	1	0	0	4	5	4	0	0	0	1	0	0	4	5	4	7	7	7	123.81	1114	1114	0	17.434	0	0	0
Q80ZR9;B1AY64	Q80ZR9;B1AY64	1;1	1;1	1;1		Cypt3	tr|Q80ZR9|Q80ZR9_MOUSE Cysteine-rich perinuclear theca 3 OS=Mus musculus OX=10090 GN=Cypt3 PE=2 SV=1;tr|B1AY64|B1AY64_MOUSE Cysteine-rich perinuclear theca 3 OS=Mus musculus OX=10090 GN=Cypt3 PE=4 SV=1	2	1	1	1	0	0	0	1	1	1	1	1	0	0	0	0	1	1	1	1	1	0	0	0	0	1	1	1	1	1	0	6.4	6.4	6.4	19.095	171	171;174	0	4.8596	0	0	0
B1AYM9	B1AYM9	1	1	1		CK137956	tr|B1AYM9|B1AYM9_MOUSE cDNA sequence CK137956 OS=Mus musculus OX=10090 GN=CK137956 PE=1 SV=1	1	1	1	1	1	1	1	0	0	0	0	0	0	1	1	1	0	0	0	0	0	0	1	1	1	0	0	0	0	0	0	1.8	1.8	1.8	65.408	596	596	0.0037578	1.8525	1.8	1.8	1.8
B1AZ46;Q8BKX1	B1AZ46;Q8BKX1	5;5	5;5	5;5	Brain-specific angiogenesis inhibitor 1-associated protein 2	Baiap2	tr|B1AZ46|B1AZ46_MOUSE Brain-specific angiogenesis inhibitor 1-associated protein 2 OS=Mus musculus OX=10090 GN=Baiap2 PE=1 SV=1;sp|Q8BKX1|BAIP2_MOUSE Brain-specific angiogenesis inhibitor 1-associated protein 2 OS=Mus musculus OX=10090 GN=Baiap2 PE=1 SV=2	2	5	5	5	0	1	1	2	1	1	3	2	4	0	1	1	2	1	1	3	2	4	0	1	1	2	1	1	3	2	4	12.7	12.7	12.7	57.681	521	521;535	0	8.3944	0	5.2	2.1
B1AZI6;E9Q5E2	B1AZI6;E9Q5E2	12;6	12;6	12;6	THO complex subunit 2	Thoc2;BC005561	sp|B1AZI6|THOC2_MOUSE THO complex subunit 2 OS=Mus musculus OX=10090 GN=Thoc2 PE=1 SV=1;tr|E9Q5E2|E9Q5E2_MOUSE THO complex subunit 2 OS=Mus musculus OX=10090 GN=Thoc2l PE=1 SV=1	2	12	12	12	0	0	0	2	2	2	7	10	10	0	0	0	2	2	2	7	10	10	0	0	0	2	2	2	7	10	10	8.7	8.7	8.7	182.77	1594	1594;1589	0	22.461	0	0	0
B1AZS9	B1AZS9	7	7	2		Prdx4	tr|B1AZS9|B1AZS9_MOUSE Peroxiredoxin 4 (Fragment) OS=Mus musculus OX=10090 GN=Prdx4 PE=1 SV=1	1	7	7	2	4	3	4	6	5	4	6	6	6	4	3	4	6	5	4	6	6	6	0	0	0	1	1	0	2	2	2	33.6	33.6	10	26.391	229	229	0	27.624	19.2	16.2	19.2
B1B0P8;B1B0P9;O88531	B1B0P8;B1B0P9;O88531	1;1;1	1;1;1	1;1;1	Palmitoyl-protein thioesterase 1	Ppt1	tr|B1B0P8|B1B0P8_MOUSE Palmitoyl-protein thioesterase 1 OS=Mus musculus OX=10090 GN=Ppt1 PE=1 SV=1;tr|B1B0P9|B1B0P9_MOUSE Palmitoyl-protein thioesterase 1 OS=Mus musculus OX=10090 GN=Ppt1 PE=1 SV=1;sp|O88531|PPT1_MOUSE Palmitoyl-protein thioesterase 1 OS=M	3	1	1	1	1	1	1	1	1	1	0	0	0	1	1	1	1	1	1	0	0	0	1	1	1	1	1	1	0	0	0	10.1	10.1	10.1	19.55	179	179;197;306	0	8.7533	10.1	10.1	10.1
B2CKC6;Q9D9T8	B2CKC6;Q9D9T8	4;4	4;4	4;4	EF-hand domain-containing protein 1	Efhc1	tr|B2CKC6|B2CKC6_MOUSE EF-hand domain (C-terminal) containing 1 OS=Mus musculus OX=10090 GN=Efhc1 PE=1 SV=1;sp|Q9D9T8|EFHC1_MOUSE EF-hand domain-containing protein 1 OS=Mus musculus OX=10090 GN=Efhc1 PE=1 SV=1	2	4	4	4	2	1	2	1	2	1	2	3	2	2	1	2	1	2	1	2	3	2	2	1	2	1	2	1	2	3	2	7.7	7.7	7.7	75.081	648	648;648	0	36.876	5.1	1.9	5.1
B2KF24;Q01755;A0A3B2WD68;A0A3B2W7H0;Q5FWA2	B2KF24;Q01755;A0A3B2WD68;A0A3B2W7H0;Q5FWA2	5;5;4;4;4	5;5;4;4;4	5;5;4;4;4	T-complex protein 11	Tcp11	tr|B2KF24|B2KF24_MOUSE T-complex protein 11 OS=Mus musculus OX=10090 GN=Tcp11 PE=1 SV=2;sp|Q01755|TCP11_MOUSE T-complex protein 11 OS=Mus musculus OX=10090 GN=Tcp11 PE=1 SV=1;tr|A0A3B2WD68|A0A3B2WD68_MOUSE T-complex protein 11 OS=Mus musculus OX=10090 GN=T	5	5	5	5	2	1	2	3	2	2	4	4	3	2	1	2	3	2	2	4	4	3	2	1	2	3	2	2	4	4	3	10.8	10.8	10.8	62.136	567	567;566;447;454;488	0	19.528	3.9	2.1	3.9
O88892;B2KF73;B2KF71	O88892;B2KF73;B2KF71	2;2;1	1;1;1	1;1;1	Small EDRK-rich factor 1	Serf1	sp|O88892|SERF1_MOUSE Small EDRK-rich factor 1 OS=Mus musculus OX=10090 GN=Serf1 PE=1 SV=1;tr|B2KF73|B2KF73_MOUSE Small EDRK-rich factor 1 OS=Mus musculus OX=10090 GN=Serf1 PE=4 SV=1;tr|B2KF71|B2KF71_MOUSE Small EDRK-rich factor 1 OS=Mus musculus OX=10090	3	2	1	1	1	2	2	1	1	0	2	1	2	0	1	1	0	0	0	1	0	1	0	1	1	0	0	0	1	0	1	30.6	17.7	17.7	7.3223	62	62;48;39	0.0041545	1.8254	12.9	30.6	30.6
B2LVG5;Q8BQZ5	B2LVG5;Q8BQZ5	16;12	1;1	1;1	Cleavage and polyadenylation specificity factor subunit 4	Cpsf4	tr|B2LVG5|B2LVG5_MOUSE Cleavage and polyadenylation specificity factor subunit 4 OS=Mus musculus OX=10090 GN=Cpsf4 PE=1 SV=1;sp|Q8BQZ5|CPSF4_MOUSE Cleavage and polyadenylation specificity factor subunit 4 OS=Mus musculus OX=10090 GN=Cpsf4 PE=2 SV=1	2	16	1	1	0	0	0	11	11	12	13	13	13	0	0	0	0	1	1	1	0	1	0	0	0	0	1	1	1	0	1	65.8	9.5	9.5	27.419	243	243;211	0	3.6323	0	0	0
B2LVG6	B2LVG6	16	1	1		Cpsf4	tr|B2LVG6|B2LVG6_MOUSE Cleavage and polyadenylation specificity factor subunit 4 OS=Mus musculus OX=10090 GN=Cpsf4 PE=1 SV=1	1	16	1	1	0	0	0	11	10	11	12	13	13	0	0	0	0	0	0	0	0	1	0	0	0	0	0	0	0	0	1	66	8.2	8.2	27.547	244	244	0.00046296	2.6679	0	0	0
B2M1R6;H3BKD0;H3BKI8;H3BLP7;H3BJS9;Q8BT23;H3BJ43;A0A286YE41	B2M1R6;H3BKD0	42;29;20;11;9;8;6;4	1;1;1;0;1;0;0;0	1;1;1;0;1;0;0;0		Hnrnpk	tr|B2M1R6|B2M1R6_MOUSE Heterogeneous nuclear ribonucleoprotein K OS=Mus musculus OX=10090 GN=Hnrnpk PE=1 SV=1;tr|H3BKD0|H3BKD0_MOUSE Heterogeneous nuclear ribonucleoprotein K (Fragment) OS=Mus musculus OX=10090 GN=Hnrnpk PE=1 SV=1	8	42	1	1	12	9	9	28	27	27	37	41	40	0	0	0	1	0	0	1	1	1	0	0	0	1	0	0	1	1	1	73.2	4.8	4.8	48.562	440	440;299;178;210;87;97;77;52	0	14.98	33.2	23.6	23.6
B2RPU8;D3Z5B1;Q9D1L0	B2RPU8;D3Z5B1;Q9D1L0	4;4;4	4;4;4	4;4;4	Coiled-coil-helix-coiled-coil-helix domain-containing protein 2	Zbed5;Chchd2	tr|B2RPU8|B2RPU8_MOUSE Coiled-coil-helix-coiled-coil-helix domain containing 2-like OS=Mus musculus OX=10090 GN=Zbed5 PE=1 SV=1;tr|D3Z5B1|D3Z5B1_MOUSE Coiled-coil-helix-coiled-coil-helix domain containing 2-like (Fragment) OS=Mus musculus OX=10090 GN=Zbed5	3	4	4	4	3	3	3	2	3	2	2	2	2	3	3	3	2	3	2	2	2	2	3	3	3	2	3	2	2	2	2	6.2	6.2	6.2	84.266	756	756;183;153	0	20.449	4.5	6.2	4.5
B2RQC2	B2RQC2	22	22	22	Ubiquitin carboxyl-terminal hydrolase 42	Usp42	sp|B2RQC2|UBP42_MOUSE Ubiquitin carboxyl-terminal hydrolase 42 OS=Mus musculus OX=10090 GN=Usp42 PE=1 SV=1	1	22	22	22	0	0	0	1	0	1	13	16	14	0	0	0	1	0	1	13	16	14	0	0	0	1	0	1	13	16	14	20.5	20.5	20.5	146.22	1324	1324	0	45.348	0	0	0
E9QAI5;G3UWN2;B2RQC6;E9QAT6	E9QAI5;G3UWN2;B2RQC6;E9QAT6	17;17;17;9	17;17;17;9	17;17;17;9	CAD protein;Glutamine-dependent carbamoyl-phosphate synthase;Aspartate carbamoyltransferase;Dihydroorotase	Cad	tr|E9QAI5|E9QAI5_MOUSE CAD protein OS=Mus musculus OX=10090 GN=Cad PE=1 SV=1;tr|G3UWN2|G3UWN2_MOUSE Carbamoyl-phosphate synthetase 2, aspartate transcarbamylase, and dihydroorotase OS=Mus musculus OX=10090 GN=Cad PE=1 SV=1;sp|B2RQC6|PYR1_MOUSE CAD protein	4	17	17	17	8	11	11	12	8	11	8	11	10	8	11	11	12	8	11	8	11	10	8	11	11	12	8	11	8	11	10	9	9	9	236.25	2162	2162;2164;2225;971	0	32.14	4.2	5.6	6.2
B2RQC7;Q3UH60;F8WI56;D3Z7D3;Q8BWT5	B2RQC7;Q3UH60;F8WI56;D3Z7D3;Q8BWT5	2;2;1;1;1	2;2;1;1;1	2;2;1;1;1	Disco-interacting protein 2 homolog B;Disco-interacting protein 2 homolog A	Dip2b;Dip2a	tr|B2RQC7|B2RQC7_MOUSE DIP2 disco-interacting protein 2 homolog B (Drosophila) OS=Mus musculus OX=10090 GN=Dip2b PE=1 SV=1;sp|Q3UH60|DIP2B_MOUSE Disco-interacting protein 2 homolog B OS=Mus musculus OX=10090 GN=Dip2b PE=1 SV=1;tr|F8WI56|F8WI56_MOUSE Disco	5	2	2	2	0	0	0	0	0	0	1	1	2	0	0	0	0	0	0	1	1	2	0	0	0	0	0	0	1	1	2	1.6	1.6	1.6	146.7	1340	1340;1574;1562;1572;1523	0.00088261	2.3079	0	0	0
B2RR24;S4R299	B2RR24;S4R299	1;1	1;1	1;1		Zfp236	tr|B2RR24|B2RR24_MOUSE Zinc finger protein 236 OS=Mus musculus OX=10090 GN=Zfp236 PE=1 SV=1;tr|S4R299|S4R299_MOUSE Zinc finger protein 236 OS=Mus musculus OX=10090 GN=Zfp236 PE=1 SV=1	2	1	1	1	1	0	1	0	0	0	0	0	0	1	0	1	0	0	0	0	0	0	1	0	1	0	0	0	0	0	0	0.6	0.6	0.6	197.83	1799	1799;1847	1	-2	0.6	0	0.6
B2RR83;A0A0J9YV44	B2RR83	72;33	72;33	72;33	Probable ATP-dependent RNA helicase YTHDC2	Ythdc2	sp|B2RR83|YTDC2_MOUSE 3-5 RNA helicase YTHDC2 OS=Mus musculus OX=10090 GN=Ythdc2 PE=1 SV=1	2	72	72	72	3	4	3	37	36	37	57	57	59	3	4	3	37	36	37	57	57	59	3	4	3	37	36	37	57	57	59	52.2	52.2	52.2	161.09	1445	1445;585	0	323.31	2.4	3.1	2.3
K3W4L0;B2RRE2;E9QAX2;Q9JMH9;E9Q405;A0A1C7ZN10;E9QA74	K3W4L0;B2RRE2;E9QAX2;Q9JMH9;E9Q405;A0A1C7ZN10;E9QA74	14;14;14;14;13;13;12	14;14;14;14;13;13;12	14;14;14;14;13;13;12	Unconventional myosin-XVIIIa	Myo18a	tr|K3W4L0|K3W4L0_MOUSE Myosin XVIIIA OS=Mus musculus OX=10090 GN=Myo18a PE=1 SV=1;tr|B2RRE2|B2RRE2_MOUSE Myo18a protein OS=Mus musculus OX=10090 GN=Myo18a PE=1 SV=1;tr|E9QAX2|E9QAX2_MOUSE Myosin XVIIIA OS=Mus musculus OX=10090 GN=Myo18a PE=1 SV=1;sp|Q9JMH9	7	14	14	14	9	6	11	0	0	1	2	2	2	9	6	11	0	0	1	2	2	2	9	6	11	0	0	1	2	2	2	8.4	8.4	8.4	230.99	2036	2036;2047;2083;2050;1700;1722;1642	0	25.815	5.1	3	6.9
F7CVW0;B2RRI2;Q689Z5;Q3TMM7;A0A0G2JGC7;A0A0G2JEM3;A0A0G2JG63;A0A0G2JDL6;A0A0G2JF11;A0A0G2JFU7	F7CVW0;B2RRI2;Q689Z5;Q3TMM7;A0A0G2JGC7;A0A0G2JEM3	5;5;5;3;3;3;2;1;1;1	5;5;5;3;3;3;2;1;1;1	5;5;5;3;3;3;2;1;1;1	Protein strawberry notch homolog 1	Sbno1	tr|F7CVW0|F7CVW0_MOUSE Strawberry notch 1 (Fragment) OS=Mus musculus OX=10090 GN=Sbno1 PE=1 SV=1;tr|B2RRI2|B2RRI2_MOUSE Sbno1 protein OS=Mus musculus OX=10090 GN=Sbno1 PE=1 SV=1;sp|Q689Z5|SBNO1_MOUSE Protein strawberry notch homolog 1 OS=Mus musculus OX=10	10	5	5	5	1	0	0	1	1	1	4	1	2	1	0	0	1	1	1	4	1	2	1	0	0	1	1	1	4	1	2	5.8	5.8	5.8	153.79	1390	1390;1391;1390;663;755;785;242;133;211;263	0	14.397	1	0	0
B2RSY5	B2RSY5	8	8	5		Adam6a	tr|B2RSY5|B2RSY5_MOUSE A disintegrin and metallopeptidase domain 6 OS=Mus musculus OX=10090 GN=Adam6a PE=1 SV=1	1	8	8	5	2	2	2	2	3	2	4	4	6	2	2	2	2	3	2	4	4	6	0	0	0	1	2	1	3	3	3	12.1	12.1	8	85.147	754	754	0	18.458	2.5	2.5	2.5
B2RUD9	B2RUD9	3	3	2		Gm4787	tr|B2RUD9|B2RUD9_MOUSE Predicted gene 4787 OS=Mus musculus OX=10090 GN=Gm4787 PE=1 SV=1	1	3	3	2	1	1	1	1	1	2	1	2	1	1	1	1	1	1	2	1	2	1	0	0	0	0	0	1	0	1	0	4.5	4.5	3.2	83.425	748	748	0	6.9487	1.3	1.3	1.3
B2RUF0;Q9Z2C8	B2RUF0;Q9Z2C8	38;33	32;27	6;5	Y-box-binding protein 2	Ybx2	tr|B2RUF0|B2RUF0_MOUSE Y box protein 2 OS=Mus musculus OX=10090 GN=Ybx2 PE=1 SV=1;sp|Q9Z2C8|YBOX2_MOUSE Y-box-binding protein 2 OS=Mus musculus OX=10090 GN=Ybx2 PE=1 SV=1	2	38	32	6	17	16	15	33	35	32	37	37	37	15	14	12	27	29	26	31	31	31	3	3	3	4	5	4	6	6	6	90.8	88.6	29	38.08	359	359;360	0	323.31	59.3	63.5	59.3
B7ZWM8;B2RXP1;E9QAU9;Q8BVU0;F6YZL6;F6Y466;F6TPH7;E9Q892	B7ZWM8;B2RXP1;E9QAU9;Q8BVU0	4;4;4;4;1;1;1;1	4;4;4;4;1;1;1;1	4;4;4;4;1;1;1;1	Leucine-rich repeat and calponin homology domain-containing protein 3	Lrch3	tr|B7ZWM8|B7ZWM8_MOUSE Leucine-rich repeats and calponin homology (CH) domain containing 3 OS=Mus musculus OX=10090 GN=Lrch3 PE=1 SV=1;tr|B2RXP1|B2RXP1_MOUSE Leucine-rich repeats and calponin homology (CH) domain containing 3 OS=Mus musculus OX=10090 GN=Lr	8	4	4	4	0	2	0	3	2	2	1	4	3	0	2	0	3	2	2	1	4	3	0	2	0	3	2	2	1	4	3	8.7	8.7	8.7	76.286	692	692;742;796;778;249;253;265;624	0	36.522	0	4.6	0
B2RXW8;B2RXQ2;S4R1D4;F7CYX4;B8QI34;Q8BSS9	B2RXW8;B2RXQ2;S4R1D4	3;3;2;1;1;1	3;3;2;1;1;1	3;3;2;1;1;1		Ppfia1	tr|B2RXW8|B2RXW8_MOUSE Ppfia1 protein OS=Mus musculus OX=10090 GN=Ppfia1 PE=1 SV=1;tr|B2RXQ2|B2RXQ2_MOUSE Ppfia1 protein OS=Mus musculus OX=10090 GN=Ppfia1 PE=1 SV=1;tr|S4R1D4|S4R1D4_MOUSE Protein tyrosine phosphatase, receptor type, f polypeptide (PTPRF),	6	3	3	3	0	0	0	0	0	1	1	0	2	0	0	0	0	0	1	1	0	2	0	0	0	0	0	1	1	0	2	2.4	2.4	2.4	140.13	1241	1241;1266;562;1256;1257;1257	0	3.2161	0	0	0
B2RXQ4;B7ZWK0;B2RXX0;P51954	B2RXQ4;B7ZWK0;B2RXX0;P51954	5;5;5;5	5;5;5;5	5;5;5;5	Serine/threonine-protein kinase Nek1	Nek1	tr|B2RXQ4|B2RXQ4_MOUSE NIMA (never in mitosis gene a)-related expressed kinase 1 OS=Mus musculus OX=10090 GN=Nek1 PE=1 SV=1;tr|B7ZWK0|B7ZWK0_MOUSE NIMA (never in mitosis gene a)-related expressed kinase 1 OS=Mus musculus OX=10090 GN=Nek1 PE=1 SV=1;tr|B2RXX	4	5	5	5	0	0	0	1	2	3	3	2	3	0	0	0	1	2	3	3	2	3	0	0	0	1	2	3	3	2	3	5.1	5.1	5.1	133.85	1178	1178;1231;1275;1203	0	7.8846	0	0	0
Q8BIZ8;B2RXS3;F8VQ70	Q8BIZ8;B2RXS3;F8VQ70	3;3;3	3;3;3	3;3;3		Scaper	tr|Q8BIZ8|Q8BIZ8_MOUSE S phase cyclin A-associated protein in the ER OS=Mus musculus OX=10090 GN=Scaper PE=1 SV=1;tr|B2RXS3|B2RXS3_MOUSE S phase cyclin A-associated protein in the ER OS=Mus musculus OX=10090 GN=Scaper PE=1 SV=1;tr|F8VQ70|F8VQ70_MOUSE S pha	3	3	3	3	0	0	0	1	1	2	2	3	1	0	0	0	1	1	2	2	3	1	0	0	0	1	1	2	2	3	1	4.3	4.3	4.3	100.74	905	905;1392;1398	0	5.5743	0	0	0
B2RY50	B2RY50	4	4	4	Armadillo repeat-containing protein 4	Armc4	sp|B2RY50|ODAD2_MOUSE Outer dynein arm-docking complex subunit 2 OS=Mus musculus OX=10090 GN=Odad2 PE=1 SV=1	1	4	4	4	0	1	0	0	1	1	2	2	1	0	1	0	0	1	1	2	2	1	0	1	0	0	1	1	2	2	1	4.1	4.1	4.1	115.26	1037	1037	0	5.2855	0	1	0
B2RY56;S4R2B0;S4R2J1;S4R2A4	B2RY56;S4R2B0	17;11;2;2	17;11;2;2	17;11;2;2	RNA-binding protein 25	Rbm25	sp|B2RY56|RBM25_MOUSE RNA-binding protein 25 OS=Mus musculus OX=10090 GN=Rbm25 PE=1 SV=2;tr|S4R2B0|S4R2B0_MOUSE RNA binding motif protein 25 (Fragment) OS=Mus musculus OX=10090 GN=Rbm25 PE=1 SV=1	4	17	17	17	0	1	1	5	6	6	15	13	14	0	1	1	5	6	6	15	13	14	0	1	1	5	6	6	15	13	14	18.6	18.6	18.6	99.551	838	838;585;174;194	0	93.772	0	1.7	1.7
B2RY71	B2RY71	4	4	4		Wdr63	sp|B2RY71|DNAI3_MOUSE Dynein axonemal intermediate chain 3 OS=Mus musculus OX=10090 GN=Dnai3 PE=1 SV=1	1	4	4	4	0	0	0	0	0	0	3	4	1	0	0	0	0	0	0	3	4	1	0	0	0	0	0	0	3	4	1	5.4	5.4	5.4	105.52	923	923	0	5.9397	0	0	0
B7FAV1;B7FAU9;Q8BTM8;F6XC15;Q80X90;Q8VHX6	B7FAV1;B7FAU9;Q8BTM8;F6XC15;Q80X90;Q8VHX6	2;2;2;1;1;1	2;2;2;1;1;1	2;2;2;1;1;1	Filamin-A;Filamin-B;Filamin-C	Flna;Flnb;Flnc	tr|B7FAV1|B7FAV1_MOUSE Filamin, alpha (Fragment) OS=Mus musculus OX=10090 GN=Flna PE=1 SV=1;tr|B7FAU9|B7FAU9_MOUSE Filamin, alpha OS=Mus musculus OX=10090 GN=Flna PE=1 SV=1;sp|Q8BTM8|FLNA_MOUSE Filamin-A OS=Mus musculus OX=10090 GN=Flna PE=1 SV=5;tr|F6XC15	6	2	2	2	0	1	2	0	1	0	0	0	0	0	1	2	0	1	0	0	0	0	0	1	2	0	1	0	0	0	0	1	1	1	274.63	2583	2583;2639;2647;511;2602;2726	0	3.6599	0	0.6	1
B7XG49	B7XG49	16	16	16		Fam71a	tr|B7XG49|B7XG49_MOUSE Golgi associated RAB2 interactor family member 4 OS=Mus musculus OX=10090 GN=Garin4 PE=1 SV=1	1	16	16	16	2	1	1	6	5	4	12	12	10	2	1	1	6	5	4	12	12	10	2	1	1	6	5	4	12	12	10	39.5	39.5	39.5	64.23	585	585	0	50.774	3.4	1.5	1.5
B7ZCR6;Q6PHP4	B7ZCR6;Q6PHP4	1;1	1;1	1;1		Znf512b	tr|B7ZCR6|B7ZCR6_MOUSE Zinc finger protein 512B OS=Mus musculus OX=10090 GN=Zfp512b PE=1 SV=1;tr|Q6PHP4|Q6PHP4_MOUSE Zinc finger protein 512B (Fragment) OS=Mus musculus OX=10090 GN=Zfp512b PE=1 SV=1	2	1	1	1	0	0	0	0	0	0	0	0	1	0	0	0	0	0	0	0	0	1	0	0	0	0	0	0	0	0	1	1.7	1.7	1.7	95.329	869	869;879	0	2.8959	0	0	0
B7ZCS4;F6XMY4;Q9QVN7	B7ZCS4;F6XMY4;Q9QVN7	6;6;6	6;6;6	5;5;5	Transcription elongation factor A protein 2	Tcea2	tr|B7ZCS4|B7ZCS4_MOUSE Transcription elongation factor (Fragment) OS=Mus musculus OX=10090 GN=Tcea2 PE=1 SV=1;tr|F6XMY4|F6XMY4_MOUSE Transcription elongation factor (Fragment) OS=Mus musculus OX=10090 GN=Tcea2 PE=1 SV=1;sp|Q9QVN7|TCEA2_MOUSE Transcription	3	6	6	5	0	0	0	3	2	3	3	4	5	0	0	0	3	2	3	3	4	5	0	0	0	2	1	2	3	3	4	24	24	20.5	32.8	292	292;297;299	0	10.993	0	0	0
B7ZCU2;B7ZCU5;B7ZCU4;B7ZCU3;B7ZCU0;J3QNK8;Q8CBW3	B7ZCU2;B7ZCU5;B7ZCU4;B7ZCU3;B7ZCU0;J3QNK8;Q8CBW3	1;1;1;1;1;1;1	1;1;1;1;1;1;1	1;1;1;1;1;1;1	Abl interactor 1	Abi1	tr|B7ZCU2|B7ZCU2_MOUSE Abl interactor 1 OS=Mus musculus OX=10090 GN=Abi1 PE=1 SV=1;tr|B7ZCU5|B7ZCU5_MOUSE Abl interactor 1 OS=Mus musculus OX=10090 GN=Abi1 PE=1 SV=1;tr|B7ZCU4|B7ZCU4_MOUSE Abl interactor 1 OS=Mus musculus OX=10090 GN=Abi1 PE=1 SV=1;tr|B7ZC	7	1	1	1	0	0	0	0	0	0	1	1	0	0	0	0	0	0	0	1	1	0	0	0	0	0	0	0	1	1	0	4.1	4.1	4.1	43.174	393	393;422;451;452;480;481;481	0.00089286	2.3971	0	0	0
B7ZMP1	B7ZMP1	1	1	1	Probable Xaa-Pro aminopeptidase 3	Xpnpep3	sp|B7ZMP1|XPP3_MOUSE Xaa-Pro aminopeptidase 3 OS=Mus musculus OX=10090 GN=Xpnpep3 PE=1 SV=1	1	1	1	1	0	0	0	0	0	0	1	1	0	0	0	0	0	0	0	1	1	0	0	0	0	0	0	0	1	1	0	3.4	3.4	3.4	56.677	506	506	0	4.207	0	0	0
B7ZN28;Q9EPX2	B7ZN28;Q9EPX2	2;2	2;2	2;2	Papilin	Papln	tr|B7ZN28|B7ZN28_MOUSE Papilin, proteoglycan-like sulfated glycoprotein OS=Mus musculus OX=10090 GN=Papln PE=1 SV=1;sp|Q9EPX2|PPN_MOUSE Papilin OS=Mus musculus OX=10090 GN=Papln PE=2 SV=2	2	2	2	2	0	0	0	0	0	0	1	0	1	0	0	0	0	0	0	1	0	1	0	0	0	0	0	0	1	0	1	1.8	1.8	1.8	141.37	1302	1302;1280	0.0049751	1.8143	0	0	0
B7ZNL2;Q78ZA7;A0A140LJB5;A0A140LI78;A0A140LJ37	B7ZNL2;Q78ZA7;A0A140LJB5	6;6;4;1;1	6;6;4;1;1	4;4;2;1;1	Nucleosome assembly protein 1-like 4	Nap1l4	tr|B7ZNL2|B7ZNL2_MOUSE Nap1l4 protein OS=Mus musculus OX=10090 GN=Nap1l4 PE=1 SV=1;sp|Q78ZA7|NP1L4_MOUSE Nucleosome assembly protein 1-like 4 OS=Mus musculus OX=10090 GN=Nap1l4 PE=1 SV=1;tr|A0A140LJB5|A0A140LJB5_MOUSE Nucleosome assembly protein 1-like 4 (	5	6	6	4	4	4	5	1	1	1	1	0	0	4	4	5	1	1	1	1	0	0	3	2	3	1	1	1	1	0	0	17.1	17.1	14.2	43.934	386	386;375;219;58;75	0	13.038	14	9.6	12.4
B8JJC1;Q8BJ37	B8JJC1;Q8BJ37	1;1	1;1	1;1	Tyrosyl-DNA phosphodiesterase 1	Tdp1	tr|B8JJC1|B8JJC1_MOUSE Tyrosyl-DNA phosphodiesterase 1 OS=Mus musculus OX=10090 GN=Tdp1 PE=1 SV=1;sp|Q8BJ37|TYDP1_MOUSE Tyrosyl-DNA phosphodiesterase 1 OS=Mus musculus OX=10090 GN=Tdp1 PE=1 SV=2	2	1	1	1	0	1	1	1	1	1	0	0	0	0	1	1	1	1	1	0	0	0	0	1	1	1	1	1	0	0	0	2.6	2.6	2.6	68.59	609	609;609	0.00091324	2.5429	0	2.6	2.6
B9EHJ3;P39447;A0A0U1RPW2;A0A0U1RPB2	B9EHJ3;P39447;A0A0U1RPW2	24;23;19;1	24;23;19;1	24;23;19;1	Tight junction protein ZO-1	Tjp1	tr|B9EHJ3|B9EHJ3_MOUSE Tight junction protein 1 OS=Mus musculus OX=10090 GN=Tjp1 PE=1 SV=1;sp|P39447|ZO1_MOUSE Tight junction protein ZO-1 OS=Mus musculus OX=10090 GN=Tjp1 PE=1 SV=2;tr|A0A0U1RPW2|A0A0U1RPW2_MOUSE Tight junction protein 1 OS=Mus musculus OX	4	24	24	24	12	8	9	6	10	8	14	14	16	12	8	9	6	10	8	14	14	16	12	8	9	6	10	8	14	14	16	18.8	18.8	18.8	188.85	1685	1685;1745;1128;171	0	65.423	9.7	5.3	6.8
B9EI21;O54836	B9EI21;O54836	1;1	1;1	1;1	Zinc finger matrin-type protein 3	Zmat3	tr|B9EI21|B9EI21_MOUSE Zinc finger matrin type 3 OS=Mus musculus OX=10090 GN=Zmat3 PE=1 SV=1;sp|O54836|ZMAT3_MOUSE Zinc finger matrin-type protein 3 OS=Mus musculus OX=10090 GN=Zmat3 PE=2 SV=1	2	1	1	1	0	0	0	0	0	0	1	1	1	0	0	0	0	0	0	1	1	1	0	0	0	0	0	0	1	1	1	6.2	6.2	6.2	32.05	290	290;290	0	3.1756	0	0	0
B9EJX5;Q8C176	B9EJX5;Q8C176	4;4	4;4	4;4	Transcription initiation factor TFIID subunit 2	Taf2	tr|B9EJX5|B9EJX5_MOUSE Transcription initiation factor TFIID subunit 2 OS=Mus musculus OX=10090 GN=Taf2 PE=1 SV=1;sp|Q8C176|TAF2_MOUSE Transcription initiation factor TFIID subunit 2 OS=Mus musculus OX=10090 GN=Taf2 PE=2 SV=2	2	4	4	4	0	0	1	2	2	0	3	3	4	0	0	1	2	2	0	3	3	4	0	0	1	2	2	0	3	3	4	3.9	3.9	3.9	136.92	1198	1198;1104	0	12.843	0	0	0.8
Q80TL7;B9EKJ3;A0A1W2P878	Q80TL7;B9EKJ3	3;3;1	3;3;1	3;3;1	Protein MON2 homolog	Mon2	sp|Q80TL7|MON2_MOUSE Protein MON2 homolog OS=Mus musculus OX=10090 GN=Mon2 PE=1 SV=2;tr|B9EKJ3|B9EKJ3_MOUSE Protein MON2 homolog OS=Mus musculus OX=10090 GN=Mon2 PE=1 SV=1	3	3	3	3	0	1	1	1	0	1	0	1	1	0	1	1	1	0	1	0	1	1	0	1	1	1	0	1	0	1	1	1.8	1.8	1.8	189.08	1715	1715;1709;436	0	3.9495	0	0.6	0.6
C0J8I2	C0J8I2	11	11	11		St6galnac2	tr|C0J8I2|C0J8I2_MOUSE Alpha-N-acetylgalactosaminide alpha-2,6-sialyltransferase 2 OS=Mus musculus OX=10090 GN=St6galnac2 PE=1 SV=1	1	11	11	11	7	8	9	9	7	9	8	7	8	7	8	9	9	7	9	8	7	8	7	8	9	9	7	9	8	7	8	52.9	52.9	52.9	31.115	289	289	0	38.119	31.8	38.1	44.6
C4P6S0	C4P6S0	1	1	1	Sperm head and tail associated protein	Nsun4	sp|C4P6S0|SHTAP_MOUSE Sperm head and tail associated protein OS=Mus musculus OX=10090 GN=Nsun4 PE=1 SV=1	1	1	1	1	0	0	0	0	1	0	0	0	1	0	0	0	0	1	0	0	0	1	0	0	0	0	1	0	0	0	1	1.9	1.9	1.9	86.303	806	806	0.0048662	1.7101	0	0	0
D3YTL6;Q9D384	D3YTL6;Q9D384	1;1	1;1	1;1	U11/U12 small nuclear ribonucleoprotein 35 kDa protein	Snrnp35	tr|D3YTL6|D3YTL6_MOUSE Small nuclear ribonucleoprotein 35 (U11/U12) (Fragment) OS=Mus musculus OX=10090 GN=Snrnp35 PE=1 SV=1;sp|Q9D384|U1SBP_MOUSE U11/U12 small nuclear ribonucleoprotein 35 kDa protein OS=Mus musculus OX=10090 GN=Snrnp35 PE=2 SV=1	2	1	1	1	0	0	0	0	0	0	1	1	1	0	0	0	0	0	0	1	1	1	0	0	0	0	0	0	1	1	1	11.6	11.6	11.6	13.993	121	121;244	0	11.501	0	0	0
D3YTQ3;F6VQH5	D3YTQ3;F6VQH5	20;19	1;0	1;0		Hnrnpdl	tr|D3YTQ3|D3YTQ3_MOUSE Heterogeneous nuclear ribonucleoprotein D-like OS=Mus musculus OX=10090 GN=Hnrnpdl PE=1 SV=1;tr|F6VQH5|F6VQH5_MOUSE Heterogeneous nuclear ribonucleoprotein D-like (Fragment) OS=Mus musculus OX=10090 GN=Hnrnpdl PE=1 SV=1	2	20	1	1	2	2	2	13	16	15	20	17	14	0	0	0	0	0	0	1	1	1	0	0	0	0	0	0	1	1	1	31.7	3.6	3.6	46.27	420	420;323	0	2.9276	6	6	6
D3YTQ9;P62843	D3YTQ9;P62843	3;3	3;3	3;3	40S ribosomal protein S15	Rps15	tr|D3YTQ9|D3YTQ9_MOUSE 40S ribosomal protein S15 OS=Mus musculus OX=10090 GN=Rps15 PE=1 SV=1;sp|P62843|RS15_MOUSE Small ribosomal subunit protein uS19 OS=Mus musculus OX=10090 GN=Rps15 PE=1 SV=2	2	3	3	3	2	1	1	1	1	0	2	0	2	2	1	1	1	1	0	2	0	2	2	1	1	1	1	0	2	0	2	44.1	44.1	44.1	13.742	118	118;145	0	4.4265	21.2	11	11
D3YTR3;Q3UE17;G3UYU0	D3YTR3;Q3UE17	12;11;1	12;11;1	10;9;0	RNA-binding protein MEX3D	Mex3d	tr|D3YTR3|D3YTR3_MOUSE Mex3 RNA binding family member D OS=Mus musculus OX=10090 GN=Mex3d PE=1 SV=2;sp|Q3UE17|MEX3D_MOUSE RNA-binding protein MEX3D OS=Mus musculus OX=10090 GN=Mex3d PE=1 SV=2	3	12	12	10	2	2	3	7	8	6	10	11	9	2	2	3	7	8	6	10	11	9	2	2	3	6	7	5	9	9	8	25.6	25.6	21.7	72.312	718	718;643;520	0	202.44	6	6	8.1
F6WZH1;D3YTR5;D3YTR4;Q9Z2D8	F6WZH1;D3YTR5;D3YTR4;Q9Z2D8	1;1;1;1	1;1;1;1	1;1;1;1	Methyl-CpG-binding domain protein 3	Mbd3	tr|F6WZH1|F6WZH1_MOUSE Methyl-CpG binding domain protein 3 (Fragment) OS=Mus musculus OX=10090 GN=Mbd3 PE=1 SV=1;tr|D3YTR5|D3YTR5_MOUSE Methyl-CpG binding domain protein 3 OS=Mus musculus OX=10090 GN=Mbd3 PE=1 SV=1;tr|D3YTR4|D3YTR4_MOUSE Methyl-CpG binding	4	1	1	1	0	0	0	0	1	0	0	1	0	0	0	0	0	1	0	0	1	0	0	0	0	0	1	0	0	1	0	8.1	8.1	8.1	20.445	185	185;261;281;285	0	3.0501	0	0	0
D3YWT0;D3Z569;D3YTS1;Q9R0P6	D3YWT0;D3Z569;D3YTS1;Q9R0P6	1;1;1;1	1;1;1;1	1;1;1;1	Signal peptidase complex catalytic subunit SEC11;Signal peptidase complex catalytic subunit SEC11A	Sec11a	tr|D3YWT0|D3YWT0_MOUSE Signal peptidase complex catalytic subunit SEC11 OS=Mus musculus OX=10090 GN=Sec11a PE=1 SV=1;tr|D3Z569|D3Z569_MOUSE Signal peptidase complex catalytic subunit SEC11 OS=Mus musculus OX=10090 GN=Sec11a PE=1 SV=1;tr|D3YTS1|D3YTS1_MOUSE	4	1	1	1	0	0	0	0	0	0	0	0	1	0	0	0	0	0	0	0	0	1	0	0	0	0	0	0	0	0	1	7.1	7.1	7.1	19.569	170	170;190;247;179	0.00088067	2.2977	0	0	0
E9QP59;D3YU56;Q9WU40	E9QP59;D3YU56;Q9WU40	1;1;1	1;1;1	1;1;1	Inner nuclear membrane protein Man1	Lemd3	tr|E9QP59|E9QP59_MOUSE LEM domain containing 3 OS=Mus musculus OX=10090 GN=Lemd3 PE=1 SV=1;tr|D3YU56|D3YU56_MOUSE LEM domain containing 3 OS=Mus musculus OX=10090 GN=Lemd3 PE=1 SV=1;sp|Q9WU40|MAN1_MOUSE Inner nuclear membrane protein Man1 OS=Mus musculus O	3	1	1	1	0	0	0	0	0	0	1	1	1	0	0	0	0	0	0	1	1	1	0	0	0	0	0	0	1	1	1	2.5	2.5	2.5	100.16	918	918;940;921	0	2.9208	0	0	0
F6SBR5;D3Z1U0;E9QL53;D3YU89;P49025	F6SBR5;D3Z1U0;E9QL53;D3YU89;P49025	1;1;1;1;1	1;1;1;1;1	1;1;1;1;1	Citron Rho-interacting kinase	Cit	tr|F6SBR5|F6SBR5_MOUSE Citron Rho-interacting kinase OS=Mus musculus OX=10090 GN=Cit PE=1 SV=2;tr|D3Z1U0|D3Z1U0_MOUSE Citron Rho-interacting kinase OS=Mus musculus OX=10090 GN=Cit PE=1 SV=1;tr|E9QL53|E9QL53_MOUSE Citron Rho-interacting kinase OS=Mus muscul	5	1	1	1	0	0	0	1	0	0	0	0	1	0	0	0	1	0	0	0	0	1	0	0	0	1	0	0	0	0	1	0.6	0.6	0.6	230.18	2013	2013;2028;2055;2070;2055	0.0064673	1.6758	0	0	0
D3YUK4;Q9DCS9	D3YUK4;Q9DCS9	2;2	2;2	2;2	NADH dehydrogenase [ubiquinone] 1 beta subcomplex subunit 10	Ndufb10	tr|D3YUK4|D3YUK4_MOUSE NADH dehydrogenase [ubiquinone] 1 beta subcomplex subunit 10 (Fragment) OS=Mus musculus OX=10090 GN=Ndufb10 PE=1 SV=1;sp|Q9DCS9|NDUBA_MOUSE NADH dehydrogenase [ubiquinone] 1 beta subcomplex subunit 10 OS=Mus musculus OX=10090 GN=Nduf	2	2	2	2	0	0	2	2	1	2	2	2	2	0	0	2	2	1	2	2	2	2	0	0	2	2	1	2	2	2	2	22.1	22.1	22.1	17.74	149	149;176	0	22.216	0	0	22.1
D3YUM1;Q91YT0;D3Z1U9;A0A494BAS8;D3YXX5;D6RG60;D3Z0K1	D3YUM1;Q91YT0;D3Z1U9	5;5;4;2;1;1;1	5;5;4;2;1;1;1	5;5;4;2;1;1;1	NADH dehydrogenase [ubiquinone] flavoprotein 1, mitochondrial	Ndufv1	tr|D3YUM1|D3YUM1_MOUSE NADH dehydrogenase [ubiquinone] flavoprotein 1, mitochondrial OS=Mus musculus OX=10090 GN=Ndufv1 PE=1 SV=1;sp|Q91YT0|NDUV1_MOUSE NADH dehydrogenase [ubiquinone] flavoprotein 1, mitochondrial OS=Mus musculus OX=10090 GN=Ndufv1 PE=1 SV	7	5	5	5	1	1	1	0	0	0	2	4	2	1	1	1	0	0	0	2	4	2	1	1	1	0	0	0	2	4	2	13.4	13.4	13.4	49.913	455	455;464;385;128;115;120;146	0	7.6014	2	1.8	1.8
D3Z558;E9QP31;D3YUN0;O35347	D3Z558;E9QP31;D3YUN0;O35347	1;1;1;1	1;1;1;1	1;1;1;1	Protein DGCR6	Dgcr6	tr|D3Z558|D3Z558_MOUSE DiGeorge syndrome critical region gene 6 OS=Mus musculus OX=10090 GN=Dgcr6 PE=1 SV=1;tr|E9QP31|E9QP31_MOUSE DiGeorge syndrome critical region gene 6 OS=Mus musculus OX=10090 GN=Dgcr6 PE=1 SV=1;tr|D3YUN0|D3YUN0_MOUSE DiGeorge syndrome	4	1	1	1	0	0	0	0	0	0	0	0	1	0	0	0	0	0	0	0	0	1	0	0	0	0	0	0	0	0	1	6.6	6.6	6.6	22.807	198	198;201;233;198	0	10.396	0	0	0
D3YUR9;Q8VDN4	D3YUR9;Q8VDN4	2;2	2;2	2;2	Coiled-coil domain-containing protein 92	Ccdc92	tr|D3YUR9|D3YUR9_MOUSE Coiled-coil domain containing 92 (Fragment) OS=Mus musculus OX=10090 GN=Ccdc92 PE=1 SV=1;sp|Q8VDN4|CCD92_MOUSE Coiled-coil domain-containing protein 92 OS=Mus musculus OX=10090 GN=Ccdc92 PE=1 SV=1	2	2	2	2	0	0	0	1	0	0	1	1	0	0	0	0	1	0	0	1	1	0	0	0	0	1	0	0	1	1	0	15.3	15.3	15.3	15.202	131	131;314	0	3.1957	0	0	0
D3YUS5;E9PW37	D3YUS5;E9PW37	1;1	1;1	1;1		Rasal2	tr|D3YUS5|D3YUS5_MOUSE RAS protein activator like 2 OS=Mus musculus OX=10090 GN=Rasal2 PE=1 SV=1;tr|E9PW37|E9PW37_MOUSE RAS protein activator like 2 OS=Mus musculus OX=10090 GN=Rasal2 PE=1 SV=1	2	1	1	1	0	0	0	0	0	0	0	1	0	0	0	0	0	0	0	0	1	0	0	0	0	0	0	0	0	1	0	1	1	1	142.01	1261	1261;1286	0	3.9983	0	0	0
M0QWD1;D3Z730;Q3UUT0;G3X9H1;D3Z729;Q0P688;D3YUV9;Q8BMB3	M0QWD1;D3Z730;Q3UUT0;G3X9H1;D3Z729;Q0P688;D3YUV9;Q8BMB3	2;2;2;2;2;2;2;2	2;2;2;2;2;2;2;2	2;2;2;2;2;2;2;2	Eukaryotic translation initiation factor 4E type 2	Eif4e2	tr|M0QWD1|M0QWD1_MOUSE Eukaryotic translation initiation factor 4E member 2 (Fragment) OS=Mus musculus OX=10090 GN=Eif4e2 PE=1 SV=1;tr|D3Z730|D3Z730_MOUSE Eukaryotic translation initiation factor 4E member 2 OS=Mus musculus OX=10090 GN=Eif4e2 PE=1 SV=1;tr|	8	2	2	2	0	0	0	1	0	0	0	0	1	0	0	0	1	0	0	0	0	1	0	0	0	1	0	0	0	0	1	26.6	26.6	26.6	14.703	128	128;228;233;234;236;240;259;245	0	2.7644	0	0	0
D3YUY3;F8WI18;F8WHW6;P70181;P70182;O70161	D3YUY3;F8WI18;F8WHW6;P70181;P70182;O70161	1;1;1;1;1;1	1;1;1;1;1;1	1;1;1;1;1;1	Phosphatidylinositol 4-phosphate 5-kinase type-1 beta;Phosphatidylinositol 4-phosphate 5-kinase type-1 alpha;Phosphatidylinositol 4-phosphate 5-kinase type-1 gamma	Pip5k1a;Pip5k1c;Pip5k1b	tr|D3YUY3|D3YUY3_MOUSE Phosphatidylinositol-4-phosphate 5-kinase, type 1 alpha OS=Mus musculus OX=10090 GN=Pip5k1a PE=1 SV=1;tr|F8WI18|F8WI18_MOUSE Phosphatidylinositol-4-phosphate 5-kinase, type 1 alpha OS=Mus musculus OX=10090 GN=Pip5k1a PE=1 SV=1;tr|F8W	6	1	1	1	0	0	0	0	0	1	0	0	0	0	0	0	0	0	1	0	0	0	0	0	0	0	0	1	0	0	0	2.8	2.8	2.8	55.36	497	497;545;687;539;546;661	0	3.0027	0	0	0
D3YVN4;D3YUZ2;Q8CDV6	D3YVN4;D3YUZ2;Q8CDV6	1;1;1	1;1;1	1;1;1	Coiled-coil domain-containing protein 63	Ccdc63	tr|D3YVN4|D3YVN4_MOUSE Coiled-coil domain containing 63 OS=Mus musculus OX=10090 GN=Ccdc63 PE=1 SV=2;tr|D3YUZ2|D3YUZ2_MOUSE Coiled-coil domain containing 63 OS=Mus musculus OX=10090 GN=Ccdc63 PE=1 SV=2;sp|Q8CDV6|CCD63_MOUSE Coiled-coil domain-containing pr	3	1	1	1	1	0	0	1	1	1	1	1	1	1	0	0	1	1	1	1	1	1	1	0	0	1	1	1	1	1	1	1.5	1.5	1.5	68.036	582	582;561;558	0.0086922	1.5102	1.5	0	0
D3YV10;Q8BYN7;F6RL14	D3YV10	15;2;1	15;2;1	15;2;1	Coiled-coil domain-containing protein 13	Ccdc13	sp|D3YV10|CCD13_MOUSE Coiled-coil domain-containing protein 13 OS=Mus musculus OX=10090 GN=Ccdc13 PE=1 SV=1	3	15	15	15	0	2	1	3	4	4	9	10	8	0	2	1	3	4	4	9	10	8	0	2	1	3	4	4	9	10	8	24	24	24	79.749	709	709;254;101	0	28.636	0	2.4	1.1
D3YZL3;D3YV79;Q0VEE6	D3YZL3;D3YV79;Q0VEE6	2;2;2	2;2;2	2;2;2	Zinc finger protein 800	Zfp800;Znf800	tr|D3YZL3|D3YZL3_MOUSE Zinc finger protein 800 (Fragment) OS=Mus musculus OX=10090 GN=Zfp800 PE=1 SV=1;tr|D3YV79|D3YV79_MOUSE Zinc finger protein 800 (Fragment) OS=Mus musculus OX=10090 GN=Zfp800 PE=1 SV=1;sp|Q0VEE6|ZN800_MOUSE Zinc finger protein 800 OS=M	3	2	2	2	0	0	0	0	0	0	1	1	2	0	0	0	0	0	0	1	1	2	0	0	0	0	0	0	1	1	2	20.6	20.6	20.6	18.425	160	160;469;662	0	6.7048	0	0	0
E9PYE2;D3YVH5;Q8BSA9	E9PYE2;D3YVH5;Q8BSA9	1;1;1	1;1;1	1;1;1	tRNA wybutosine-synthesizing protein 3 homolog	Tyw3	tr|E9PYE2|E9PYE2_MOUSE tRNA wybutosine-synthesizing protein 3 homolog OS=Mus musculus OX=10090 GN=Tyw3 PE=1 SV=1;tr|D3YVH5|D3YVH5_MOUSE tRNA wybutosine-synthesizing protein 3 homolog (Fragment) OS=Mus musculus OX=10090 GN=Tyw3 PE=1 SV=1;sp|Q8BSA9|TYW3_MOUS	3	1	1	1	0	0	0	0	0	0	0	0	1	0	0	0	0	0	0	0	0	1	0	0	0	0	0	0	0	0	1	10.4	10.4	10.4	15.742	144	144;159;257	0	2.7294	0	0	0
D3YVJ1	D3YVJ1	1	1	1		Gm5901	tr|D3YVJ1|D3YVJ1_MOUSE Predicted gene 5901 OS=Mus musculus OX=10090 GN=Gm5901 PE=1 SV=1	1	1	1	1	0	1	0	0	0	1	1	0	0	0	1	0	0	0	1	1	0	0	0	1	0	0	0	1	1	0	0	6.9	6.9	6.9	36.62	333	333	0.00090868	2.5148	0	6.9	0
E9Q8Y1;D3YVJ6;Q7TNV0	E9Q8Y1;D3YVJ6;Q7TNV0	3;3;3	3;3;3	3;3;3	Protein DEK	Dek	tr|E9Q8Y1|E9Q8Y1_MOUSE DEK proto-oncogene (DNA binding) (Fragment) OS=Mus musculus OX=10090 GN=Dek PE=1 SV=1;tr|D3YVJ6|D3YVJ6_MOUSE DEK proto-oncogene (DNA binding) (Fragment) OS=Mus musculus OX=10090 GN=Dek PE=1 SV=1;sp|Q7TNV0|DEK_MOUSE Protein DEK OS=Mus	3	3	3	3	0	0	0	0	0	0	3	3	3	0	0	0	0	0	0	3	3	3	0	0	0	0	0	0	3	3	3	17.3	17.3	17.3	23.048	202	202;258;380	0	8.5833	0	0	0
D3Z3E8;E9PW39;D3YVL0;P23249	D3Z3E8;E9PW39;D3YVL0;P23249	22;22;22;22	22;22;22;22	22;22;22;22	Putative helicase MOV-10	Mov10	tr|D3Z3E8|D3Z3E8_MOUSE RNA helicase OS=Mus musculus OX=10090 GN=Mov10 PE=1 SV=1;tr|E9PW39|E9PW39_MOUSE RNA helicase OS=Mus musculus OX=10090 GN=Mov10 PE=1 SV=1;tr|D3YVL0|D3YVL0_MOUSE RNA helicase OS=Mus musculus OX=10090 GN=Mov10 PE=1 SV=2;sp|P23249|MOV10_	4	22	22	22	3	1	3	16	16	16	17	15	15	3	1	3	16	16	16	17	15	15	3	1	3	16	16	16	17	15	15	28.1	28.1	28.1	113.6	1004	1004;1077;1077;1004	0	122.67	3.8	1.1	3.7
D3YVL2	D3YVL2	2	2	2		Cfap70	sp|D3YVL2|CFA70_MOUSE Cilia- and flagella-associated protein 70 OS=Mus musculus OX=10090 GN=Cfap70 PE=1 SV=2	1	2	2	2	0	0	0	0	1	1	1	0	2	0	0	0	0	1	1	1	0	2	0	0	0	0	1	1	1	0	2	2.6	2.6	2.6	128.27	1141	1141	0	8.5838	0	0	0
D3YW29;Q7TSF9;D3Z3J7	D3YW29;Q7TSF9;D3Z3J7	2;2;1	2;2;1	2;2;1		2610020H08Rik	tr|D3YW29|D3YW29_MOUSE RNA exonuclease 5 OS=Mus musculus OX=10090 GN=Rexo5 PE=1 SV=1;tr|Q7TSF9|Q7TSF9_MOUSE RNA exonuclease 5 OS=Mus musculus OX=10090 GN=Rexo5 PE=1 SV=1;tr|D3Z3J7|D3Z3J7_MOUSE RNA exonuclease 5 OS=Mus musculus OX=10090 GN=Rexo5 PE=1 SV=1	3	2	2	2	0	0	0	0	1	1	1	1	1	0	0	0	0	1	1	1	1	1	0	0	0	0	1	1	1	1	1	3.7	3.7	3.7	86.454	759	759;479;445	0	7.7655	0	0	0
Q7TQI3;D3YWF6;D3Z7K0	Q7TQI3;D3YWF6;D3Z7K0	2;2;1	2;2;1	2;2;1	Ubiquitin thioesterase OTUB1	Otub1	sp|Q7TQI3|OTUB1_MOUSE Ubiquitin thioesterase OTUB1 OS=Mus musculus OX=10090 GN=Otub1 PE=1 SV=2;tr|D3YWF6|D3YWF6_MOUSE ubiquitinyl hydrolase 1 OS=Mus musculus OX=10090 GN=Otub1 PE=1 SV=1;tr|D3Z7K0|D3Z7K0_MOUSE ubiquitinyl hydrolase 1 (Fragment) OS=Mus muscu	3	2	2	2	1	0	0	1	0	0	0	0	0	1	0	0	1	0	0	0	0	0	1	0	0	1	0	0	0	0	0	10.3	10.3	10.3	31.27	271	271;241;95	0	3.284	3.3	0	0
D3YWJ9;Q69Z89	D3YWJ9;Q69Z89	1;1	1;1	1;1	Ras-associating and dilute domain-containing protein	Radil	tr|D3YWJ9|D3YWJ9_MOUSE Ras association and DIL domains OS=Mus musculus OX=10090 GN=Radil PE=1 SV=1;sp|Q69Z89|RADIL_MOUSE Ras-associating and dilute domain-containing protein OS=Mus musculus OX=10090 GN=Radil PE=1 SV=2	2	1	1	1	0	0	0	1	1	1	1	1	0	0	0	0	1	1	1	1	1	0	0	0	0	1	1	1	1	1	0	1.6	1.6	1.6	119.67	1093	1093;1099	0.0013152	2.2648	0	0	0
D3YWN5;G5E8R5;E9Q8C9;E9QM16;Q91YK0;D6RIL3;D3YUD9	D3YWN5;G5E8R5;E9Q8C9;E9QM16;Q91YK0;D6RIL3;D3YUD9	2;2;2;2;2;1;1	2;2;2;2;2;1;1	2;2;2;2;2;1;1	Leucine-rich repeat-containing protein 49	Lrrc49	tr|D3YWN5|D3YWN5_MOUSE Leucine rich repeat containing 49 OS=Mus musculus OX=10090 GN=Lrrc49 PE=1 SV=1;tr|G5E8R5|G5E8R5_MOUSE Leucine rich repeat containing 49 OS=Mus musculus OX=10090 GN=Lrrc49 PE=1 SV=1;tr|E9Q8C9|E9Q8C9_MOUSE Leucine rich repeat containin	7	2	2	2	0	0	0	0	1	0	1	2	2	0	0	0	0	1	0	1	2	2	0	0	0	0	1	0	1	2	2	3.8	3.8	3.8	78.311	680	680;686;746;752;686;362;392	0.0033999	2.0281	0	0	0
D3YWN6;F6QFE2;Q9QXP4;D3Z6I5;D6RHL8;F6RJK8;A0A338P6Z7;D6RJM0	D3YWN6;F6QFE2;Q9QXP4;D3Z6I5	5;5;5;4;2;2;1;1	5;5;5;4;2;2;1;1	3;3;3;2;1;2;1;1	Protein downstream neighbor of Son	Donson	tr|D3YWN6|D3YWN6_MOUSE Downstream neighbor of SON OS=Mus musculus OX=10090 GN=Donson PE=1 SV=1;tr|F6QFE2|F6QFE2_MOUSE Downstream neighbor of SON (Fragment) OS=Mus musculus OX=10090 GN=Donson PE=1 SV=1;sp|Q9QXP4|DONS_MOUSE Protein downstream neighbor of Son	8	5	5	3	0	0	0	3	2	1	4	4	5	0	0	0	3	2	1	4	4	5	0	0	0	2	1	0	3	3	3	14.3	14.3	8.2	54.253	489	489;530;560;502;205;348;97;131	0	12.662	0	0	0
E9QMU3;D3YWN7;O88735;A0A1L1SVB6;A0A1L1SUN4;A0A1L1SR93	E9QMU3;D3YWN7;O88735	21;21;20;8;2;1	21;21;20;8;2;1	21;21;20;8;2;1	Ensconsin	Map7	tr|E9QMU3|E9QMU3_MOUSE Microtubule-associated protein 7 OS=Mus musculus OX=10090 GN=Map7 PE=1 SV=3;tr|D3YWN7|D3YWN7_MOUSE Microtubule-associated protein 7 OS=Mus musculus OX=10090 GN=Map7 PE=1 SV=2;sp|O88735|MAP7_MOUSE Ensconsin OS=Mus musculus OX=10090 GN	6	21	21	21	4	2	3	15	10	12	7	6	8	4	2	3	15	10	12	7	6	8	4	2	3	15	10	12	7	6	8	29	29	29	81.973	730	730;738;730;242;147;101	0	57.291	6.6	2.3	3.7
D3YWS8;Q8CBY3	D3YWS8;Q8CBY3	2;2	2;2	2;2	Leukocyte receptor cluster member 8 homolog	Leng8	tr|D3YWS8|D3YWS8_MOUSE Leukocyte receptor cluster (LRC) member 8 OS=Mus musculus OX=10090 GN=Leng8 PE=1 SV=1;sp|Q8CBY3|LENG8_MOUSE Leukocyte receptor cluster member 8 homolog OS=Mus musculus OX=10090 GN=Leng8 PE=1 SV=1	2	2	2	2	0	0	0	0	1	1	1	0	1	0	0	0	0	1	1	1	0	1	0	0	0	0	1	1	1	0	1	4	4	4	88.463	801	801;785	0	5.8491	0	0	0
D3Z3N4;D3YWT1;D3Z6Y3	D3Z3N4;D3YWT1	7;7;2	6;6;1	6;6;1		Hnrnph3	tr|D3Z3N4|D3Z3N4_MOUSE Heterogeneous nuclear ribonucleoprotein H3 OS=Mus musculus OX=10090 GN=Hnrnph3 PE=1 SV=1;tr|D3YWT1|D3YWT1_MOUSE Heterogeneous nuclear ribonucleoprotein H3 OS=Mus musculus OX=10090 GN=Hnrnph3 PE=1 SV=1	3	7	6	6	0	0	0	5	5	4	5	5	5	0	0	0	5	5	4	4	4	4	0	0	0	5	5	4	4	4	4	25.1	22.3	22.3	36.869	346	346;331;71	0	131.8	0	0	0
D3YWX2;F6YTL8;E9Q803;Q9R0I7	D3YWX2;F6YTL8;E9Q803;Q9R0I7	27;22;16;15	27;22;16;15	27;22;16;15	YLP motif-containing protein 1	Ylpm1	tr|D3YWX2|D3YWX2_MOUSE YLP motif containing 1 OS=Mus musculus OX=10090 GN=Ylpm1 PE=1 SV=2;tr|F6YTL8|F6YTL8_MOUSE YLP motif containing 1 (Fragment) OS=Mus musculus OX=10090 GN=Ylpm1 PE=1 SV=1;tr|E9Q803|E9Q803_MOUSE YLP motif containing 1 OS=Mus musculus OX=	4	27	27	27	0	0	0	10	10	10	18	24	18	0	0	0	10	10	10	18	24	18	0	0	0	10	10	10	18	24	18	16.9	16.9	16.9	241.05	2139	2139;1577;1433;1386	0	199.36	0	0	0
D3YX87;E9PUB7;Q2YDW2	D3YX87;E9PUB7;Q2YDW2	10;10;10	10;10;10	10;10;10	Protein misato homolog 1	Msto1	tr|D3YX87|D3YX87_MOUSE Misato 1, mitochondrial distribution and morphology regulator OS=Mus musculus OX=10090 GN=Msto1 PE=1 SV=1;tr|E9PUB7|E9PUB7_MOUSE Protein misato homolog 1 OS=Mus musculus OX=10090 GN=Msto1 PE=1 SV=1;sp|Q2YDW2|MSTO1_MOUSE Protein misat	3	10	10	10	6	7	6	5	4	4	7	5	7	6	7	6	5	4	4	7	5	7	6	7	6	5	4	4	7	5	7	24.9	24.9	24.9	64.227	586	586;556;556	0	49.872	12.8	15.9	11.8
D3Z568;F6Y6V5;D3YX99;D3Z6W9;Q9CQH3	D3Z568;F6Y6V5;D3YX99;D3Z6W9;Q9CQH3	1;1;1;1;1	1;1;1;1;1	1;1;1;1;1	NADH dehydrogenase [ubiquinone] 1 beta subcomplex subunit 5, mitochondrial	Ndufb5	tr|D3Z568|D3Z568_MOUSE NADH dehydrogenase [ubiquinone] 1 beta subcomplex subunit 5, mitochondrial OS=Mus musculus OX=10090 GN=Ndufb5 PE=1 SV=1;tr|F6Y6V5|F6Y6V5_MOUSE NADH dehydrogenase [ubiquinone] 1 beta subcomplex subunit 5, mitochondrial (Fragment) OS=M	5	1	1	1	1	1	1	1	1	1	1	1	1	1	1	1	1	1	1	1	1	1	1	1	1	1	1	1	1	1	1	12.6	12.6	12.6	14.038	119	119;135;172;181;189	0	3.3686	12.6	12.6	12.6
D3YXG1;F6TYD6	D3YXG1	3;1	3;1	3;1		BC089491	tr|D3YXG1|D3YXG1_MOUSE Selenoprotein V OS=Mus musculus OX=10090 GN=Selenov PE=1 SV=3	2	3	3	3	0	0	0	2	2	1	3	3	2	0	0	0	2	2	1	3	3	2	0	0	0	2	2	1	3	3	2	12.8	12.8	12.8	34.755	328	328;46	0	17.42	0	0	0
D3Z0V5;D3YXH9;E9QL22;Q3U1C6	D3Z0V5;D3YXH9;E9QL22;Q3U1C6	1;1;1;1	1;1;1;1	1;1;1;1	Putative deoxyribonuclease TATDN3	Tatdn3	tr|D3Z0V5|D3Z0V5_MOUSE TatD DNase domain containing 3 OS=Mus musculus OX=10090 GN=Tatdn3 PE=1 SV=1;tr|D3YXH9|D3YXH9_MOUSE TatD DNase domain containing 3 OS=Mus musculus OX=10090 GN=Tatdn3 PE=1 SV=1;tr|E9QL22|E9QL22_MOUSE TatD DNase domain containing 3 OS=M	4	1	1	1	0	0	0	0	0	0	0	1	1	0	0	0	0	0	0	0	1	1	0	0	0	0	0	0	0	1	1	4.7	4.7	4.7	25.609	232	232;293;294;294	0.003367	1.9228	0	0	0
S4R1M2;D3YXK2;D6RJ78;D6RHP9	S4R1M2;D3YXK2	14;14;1;1	14;14;1;1	11;11;0;0	Scaffold attachment factor B1	Safb	tr|S4R1M2|S4R1M2_MOUSE Scaffold attachment factor B OS=Mus musculus OX=10090 GN=Safb PE=1 SV=1;sp|D3YXK2|SAFB1_MOUSE Scaffold attachment factor B1 OS=Mus musculus OX=10090 GN=Safb PE=1 SV=2	4	14	14	11	0	0	0	5	6	2	6	7	6	0	0	0	5	6	2	6	7	6	0	0	0	3	5	1	4	5	3	17.4	17.4	13.4	105.32	939	939;937;179;214	0	37.191	0	0	0
D3YXT0;Q91WD5;A0A0A6YW30;A0A0A6YXD3	D3YXT0;Q91WD5	11;11;4;3	11;11;4;3	11;11;4;3	NADH dehydrogenase [ubiquinone] iron-sulfur protein 2, mitochondrial	Ndufs2	tr|D3YXT0|D3YXT0_MOUSE NADH dehydrogenase [ubiquinone] iron-sulfur protein 2, mitochondrial OS=Mus musculus OX=10090 GN=Ndufs2 PE=1 SV=1;sp|Q91WD5|NDUS2_MOUSE NADH dehydrogenase [ubiquinone] iron-sulfur protein 2, mitochondrial OS=Mus musculus OX=10090 GN=	4	11	11	11	3	3	2	1	1	0	9	4	7	3	3	2	1	1	0	9	4	7	3	3	2	1	1	0	9	4	7	28.4	28.4	28.4	49.573	437	437;463;231;145	0	20.911	7.8	8.7	6.6
D6RFV7;D3YXU8;Q91ZJ9	D6RFV7;D3YXU8;Q91ZJ9	1;1;1	1;1;1	1;1;1	Hyaluronidase;Hyaluronidase-1	Hyal1	tr|D6RFV7|D6RFV7_MOUSE Hyaluronidase OS=Mus musculus OX=10090 GN=Hyal1 PE=3 SV=2;tr|D3YXU8|D3YXU8_MOUSE Hyaluronidase OS=Mus musculus OX=10090 GN=Hyal1 PE=1 SV=1;sp|Q91ZJ9|HYAL1_MOUSE Hyaluronidase-1 OS=Mus musculus OX=10090 GN=Hyal1 PE=1 SV=3	3	1	1	1	0	0	0	0	0	1	1	1	0	0	0	0	0	0	1	1	1	0	0	0	0	0	0	1	1	1	0	5.5	5.5	5.5	20.326	182	182;432;462	1	-2	0	0	0
D3Z5Y7;D3YXZ3;Q91YS4;O88448	D3Z5Y7;D3YXZ3;Q91YS4;O88448	2;2;2;2	2;2;2;2	2;2;2;2	Kinesin light chain 2	Klc2	tr|D3Z5Y7|D3Z5Y7_MOUSE Kinesin light chain 2 (Fragment) OS=Mus musculus OX=10090 GN=Klc2 PE=1 SV=8;tr|D3YXZ3|D3YXZ3_MOUSE Kinesin light chain OS=Mus musculus OX=10090 GN=Klc2 PE=1 SV=1;tr|Q91YS4|Q91YS4_MOUSE Kinesin light chain OS=Mus musculus OX=10090 GN=	4	2	2	2	1	0	0	2	1	0	0	0	0	1	0	0	2	1	0	0	0	0	1	0	0	2	1	0	0	0	0	18.7	18.7	18.7	18.548	166	166;617;619;599	0.0048741	1.7183	6	0	0
D3Z0A8;D3YYG8;D3Z398;D3Z252;Q3U125;Q9CYH2;D3Z143;D3YWL4	D3Z0A8;D3YYG8;D3Z398;D3Z252;Q3U125;Q9CYH2;D3Z143;D3YWL4	2;2;2;2;2;2;1;1	2;2;2;2;2;2;1;1	2;2;2;2;2;2;1;1	Redox-regulatory protein FAM213A	Fam213a	tr|D3Z0A8|D3Z0A8_MOUSE Peroxiredoxin like 2A (Fragment) OS=Mus musculus OX=10090 GN=Prxl2a PE=1 SV=1;tr|D3YYG8|D3YYG8_MOUSE Peroxiredoxin like 2A (Fragment) OS=Mus musculus OX=10090 GN=Prxl2a PE=1 SV=8;tr|D3Z398|D3Z398_MOUSE Peroxiredoxin like 2A (Fragment	8	2	2	2	0	0	0	2	1	1	1	1	1	0	0	0	2	1	1	1	1	1	0	0	0	2	1	1	1	1	1	25.2	25.2	25.2	11.265	103	103;174;176;203;229;218;48;89	0	3.3322	0	0	0
F7ABZ6;D3YYQ8	F7ABZ6;D3YYQ8	3;3	1;1	1;1		Dnah10	tr|F7ABZ6|F7ABZ6_MOUSE Dynein, axonemal, heavy chain 10 OS=Mus musculus OX=10090 GN=Dnah10 PE=1 SV=2;tr|D3YYQ8|D3YYQ8_MOUSE Dynein, axonemal, heavy chain 10 OS=Mus musculus OX=10090 GN=Dnah10 PE=1 SV=2	2	3	1	1	0	0	0	0	1	0	2	3	3	0	0	0	0	0	0	1	1	1	0	0	0	0	0	0	1	1	1	0.6	0.3	0.3	522.69	4534	4534;4591	0	3.6638	0	0	0
D3YYT1;Q922P9	D3YYT1;Q922P9	8;7	8;7	8;7	Putative oxidoreductase GLYR1	Glyr1	tr|D3YYT1|D3YYT1_MOUSE Cytokine-like nuclear factor N-PAC OS=Mus musculus OX=10090 GN=Glyr1 PE=1 SV=1;sp|Q922P9|GLYR1_MOUSE Cytokine-like nuclear factor N-PAC OS=Mus musculus OX=10090 GN=Glyr1 PE=1 SV=1	2	8	8	8	1	0	1	5	4	4	6	4	3	1	0	1	5	4	4	6	4	3	1	0	1	5	4	4	6	4	3	17	17	17	60.435	552	552;546	0	24.663	2.4	0	2.4
Q9CY66;D3YZ09;F6SL78	Q9CY66;D3YZ09	4;4;1	4;4;1	4;4;1	H/ACA ribonucleoprotein complex subunit 1	Gar1	sp|Q9CY66|GAR1_MOUSE H/ACA ribonucleoprotein complex subunit 1 OS=Mus musculus OX=10090 GN=Gar1 PE=1 SV=1;tr|D3YZ09|D3YZ09_MOUSE H/ACA ribonucleoprotein complex subunit (Fragment) OS=Mus musculus OX=10090 GN=Gar1 PE=1 SV=1	3	4	4	4	0	0	0	1	1	2	3	2	3	0	0	0	1	1	2	3	2	3	0	0	0	1	1	2	3	2	3	21.2	21.2	21.2	23.474	231	231;198;79	0	9.8777	0	0	0
D3YZ62;D3Z4J3;Q99104;F6TDE5;B8JK05;F6Z2S4;D6RFU0	D3YZ62;D3Z4J3;Q99104	23;23;23;6;4;2;1	21;21;21;6;4;2;1	21;21;21;6;4;2;1	Unconventional myosin-Va	Myo5a	tr|D3YZ62|D3YZ62_MOUSE Myosin VA OS=Mus musculus OX=10090 GN=Myo5a PE=1 SV=1;tr|D3Z4J3|D3Z4J3_MOUSE Myosin VA OS=Mus musculus OX=10090 GN=Myo5a PE=1 SV=1;sp|Q99104|MYO5A_MOUSE Unconventional myosin-Va OS=Mus musculus OX=10090 GN=Myo5a PE=1 SV=2	7	23	21	21	14	17	17	3	4	2	2	4	4	13	16	15	2	3	1	1	3	3	13	16	15	2	3	1	1	3	3	14.3	13	13	212.33	1828	1828;1855;1853;585;228;217;47	0	39.918	9.1	11.1	11.7
D6REH7;D3YZC4;Q8BL95	D6REH7;D3YZC4;Q8BL95	1;1;1	1;1;1	1;1;1	UPF0769 protein C21orf59 homolog	1110004E09Rik	tr|D6REH7|D6REH7_MOUSE Cilia and flagella associate protien 298 OS=Mus musculus OX=10090 GN=Cfap298 PE=1 SV=1;tr|D3YZC4|D3YZC4_MOUSE Cilia and flagella associate protien 298 (Fragment) OS=Mus musculus OX=10090 GN=Cfap298 PE=1 SV=1;sp|Q8BL95|CF298_MOUSE Cil	3	1	1	1	0	0	0	1	0	0	1	0	0	0	0	0	1	0	0	1	0	0	0	0	0	1	0	0	1	0	0	17.9	17.9	17.9	16.123	145	145;198;290	0	7.1385	0	0	0
D3YZC9;E9Q4Q2;D3YZD0;Q64213;D3YVH4;F8WHF9;D6RDB7	D3YZC9;E9Q4Q2;D3YZD0;Q64213;D3YVH4	24;23;23;23;15;5;1	24;23;23;23;15;5;1	23;23;23;23;15;5;1	Splicing factor 1	Sf1	tr|D3YZC9|D3YZC9_MOUSE Splicing factor 1 OS=Mus musculus OX=10090 GN=Sf1 PE=1 SV=1;tr|E9Q4Q2|E9Q4Q2_MOUSE Splicing factor 1 OS=Mus musculus OX=10090 GN=Sf1 PE=1 SV=1;tr|D3YZD0|D3YZD0_MOUSE Splicing factor 1 OS=Mus musculus OX=10090 GN=Sf1 PE=1 SV=1;sp|Q642	7	24	24	23	1	1	3	20	23	18	18	20	18	1	1	3	20	23	18	18	20	18	1	1	3	20	22	18	17	19	17	44.7	44.7	42.4	61.755	571	571;548;638;653;267;110;84	0	302.31	2.5	2.5	7.5
D3YZS5;D3Z282;A0A2R8VHA7;D6RCY4;D3Z033	D3YZS5;D3Z282	25;23;10;7;3	2;2;0;2;0	2;2;0;2;0		Tarbp2	tr|D3YZS5|D3YZS5_MOUSE TARBP2, RISC loading complex RNA binding subunit (Fragment) OS=Mus musculus OX=10090 GN=Tarbp2 PE=1 SV=1;tr|D3Z282|D3Z282_MOUSE TARBP2, RISC loading complex RNA binding subunit (Fragment) OS=Mus musculus OX=10090 GN=Tarbp2 PE=1 SV=1	5	25	2	2	1	1	1	20	21	21	23	22	21	0	0	0	2	2	2	2	2	2	0	0	0	2	2	2	2	2	2	88.1	8.2	8.2	26.108	243	243;225;111;58;89	0	72.189	4.9	4.9	4.9
D3YZU6;Q9DB32	D3YZU6;Q9DB32	1;1	1;1	1;1	Hydroxyacylglutathione hydrolase-like protein	Haghl	tr|D3YZU6|D3YZU6_MOUSE Hydroxyacylglutathione hydrolase-like OS=Mus musculus OX=10090 GN=Haghl PE=1 SV=1;sp|Q9DB32|HAGHL_MOUSE Hydroxyacylglutathione hydrolase-like protein OS=Mus musculus OX=10090 GN=Haghl PE=1 SV=1	2	1	1	1	1	1	1	1	1	1	0	0	0	1	1	1	1	1	1	0	0	0	1	1	1	1	1	1	0	0	0	7.2	7.2	7.2	26.109	235	235;283	0	4.3165	7.2	7.2	7.2
Q6EDY6;D3Z030;F7AI27	Q6EDY6;D3Z030;F7AI27	8;8;7	8;8;7	8;8;7	Leucine-rich repeat-containing protein 16A	Lrrc16a	sp|Q6EDY6|CARL1_MOUSE F-actin-uncapping protein LRRC16A OS=Mus musculus OX=10090 GN=Carmil1 PE=1 SV=2;tr|D3Z030|D3Z030_MOUSE Capping protein regulator and myosin 1 linker 1 OS=Mus musculus OX=10090 GN=Carmil1 PE=1 SV=2;tr|F7AI27|F7AI27_MOUSE Capping protei	3	8	8	8	0	1	0	4	2	4	3	3	5	0	1	0	4	2	4	3	3	5	0	1	0	4	2	4	3	3	5	7.3	7.3	7.3	151.86	1374	1374;1332;932	0	12.456	0	1	0
D3Z036;O88543	D3Z036;O88543	1;1	1;1	1;1	COP9 signalosome complex subunit 3	Cops3	tr|D3Z036|D3Z036_MOUSE COP9 signalosome subunit 3 (Fragment) OS=Mus musculus OX=10090 GN=Cops3 PE=1 SV=1;sp|O88543|CSN3_MOUSE COP9 signalosome complex subunit 3 OS=Mus musculus OX=10090 GN=Cops3 PE=1 SV=3	2	1	1	1	1	1	1	1	1	1	1	1	1	1	1	1	1	1	1	1	1	1	1	1	1	1	1	1	1	1	1	11.3	11.3	11.3	11.465	106	106;423	0	5.9517	11.3	11.3	11.3
D3Z055;G3UWS5	D3Z055;G3UWS5	12;12	2;2	2;2		Pabpn1	tr|D3Z055|D3Z055_MOUSE Poly(A) binding protein, nuclear 1 OS=Mus musculus OX=10090 GN=Pabpn1 PE=1 SV=1;tr|G3UWS5|G3UWS5_MOUSE Poly(A) binding protein, nuclear 1 OS=Mus musculus OX=10090 GN=Pabpn1 PE=1 SV=1	2	12	2	2	0	0	0	5	6	5	11	11	11	0	0	0	0	0	0	2	2	2	0	0	0	0	0	0	2	2	2	57.7	10.1	10.1	19.02	168	168;178	0	23.222	0	0	0
D3Z067;O88848	D3Z067;O88848	1;1	1;1	1;1	ADP-ribosylation factor-like protein 6	Arl6	tr|D3Z067|D3Z067_MOUSE ADP-ribosylation factor-like protein 6 (Fragment) OS=Mus musculus OX=10090 GN=Arl6 PE=1 SV=1;sp|O88848|ARL6_MOUSE ADP-ribosylation factor-like protein 6 OS=Mus musculus OX=10090 GN=Arl6 PE=1 SV=1	2	1	1	1	0	1	0	0	1	0	0	0	1	0	1	0	0	1	0	0	0	1	0	1	0	0	1	0	0	0	1	4.6	4.6	4.6	22.258	194	194;186	0.003772	1.8852	0	4.6	0
D3Z0K6;A0A0G2JEI9	D3Z0K6;A0A0G2JEI9	10;8	9;7	9;7		Rsbn1l	tr|D3Z0K6|D3Z0K6_MOUSE Round spermatid basic protein 1-like OS=Mus musculus OX=10090 GN=Rsbn1l PE=1 SV=1;tr|A0A0G2JEI9|A0A0G2JEI9_MOUSE Round spermatid basic protein 1-like OS=Mus musculus OX=10090 GN=Rsbn1l PE=1 SV=1	2	10	9	9	0	0	0	0	0	1	8	8	6	0	0	0	0	0	1	7	7	5	0	0	0	0	0	1	7	7	5	14.1	13.3	13.3	91.745	821	821;616	0	26.712	0	0	0
Q9D9P1;D3Z0L4;Q9CRB9;S4R238	Q9D9P1;D3Z0L4;Q9CRB9;S4R238	4;4;4;2	4;4;4;2	4;4;4;2	MICOS complex subunit Mic19	Chchd3	tr|Q9D9P1|Q9D9P1_MOUSE Coiled-coil-helix-coiled-coil-helix domain containing 3 OS=Mus musculus OX=10090 GN=Chchd3 PE=1 SV=1;tr|D3Z0L4|D3Z0L4_MOUSE Coiled-coil-helix-coiled-coil-helix domain containing 3 (Fragment) OS=Mus musculus OX=10090 GN=Chchd3 PE=1 SV	4	4	4	4	2	2	1	2	0	2	3	3	2	2	2	1	2	0	2	3	3	2	2	2	1	2	0	2	3	3	2	25.1	25.1	25.1	20.375	175	175;192;227;84	0	6.5768	9.7	9.7	5.1
D3Z0M9	D3Z0M9	31	31	31		Ddx23	tr|D3Z0M9|D3Z0M9_MOUSE RNA helicase OS=Mus musculus OX=10090 GN=Ddx23 PE=1 SV=1	1	31	31	31	0	0	0	5	4	4	24	25	27	0	0	0	5	4	4	24	25	27	0	0	0	5	4	4	24	25	27	38.5	38.5	38.5	95.493	819	819	0	139.16	0	0	0
D3Z0T0;Q62311;D3Z5H6;S4R1R2	D3Z0T0;Q62311	9;9;2;1	9;9;2;1	9;9;2;1	Transcription initiation factor TFIID subunit 6	Taf6	tr|D3Z0T0|D3Z0T0_MOUSE TATA-box binding protein associated factor 6 OS=Mus musculus OX=10090 GN=Taf6 PE=1 SV=1;sp|Q62311|TAF6_MOUSE Transcription initiation factor TFIID subunit 6 OS=Mus musculus OX=10090 GN=Taf6 PE=1 SV=1	4	9	9	9	0	0	0	0	0	0	7	7	7	0	0	0	0	0	0	7	7	7	0	0	0	0	0	0	7	7	7	18.2	18.2	18.2	69.796	636	636;678;214;114	0	33.557	0	0	0
D3Z0Y2;Q6GT24;O08709;Q8BG37	D3Z0Y2;Q6GT24;O08709	5;5;5;2	5;5;5;2	5;5;5;2	Peroxiredoxin-6	Prdx6	tr|D3Z0Y2|D3Z0Y2_MOUSE Peroxiredoxin-6 OS=Mus musculus OX=10090 GN=Prdx6 PE=1 SV=1;tr|Q6GT24|Q6GT24_MOUSE Peroxiredoxin-6 OS=Mus musculus OX=10090 GN=Prdx6 PE=1 SV=1;sp|O08709|PRDX6_MOUSE Peroxiredoxin-6 OS=Mus musculus OX=10090 GN=Prdx6 PE=1 SV=3	4	5	5	5	2	1	3	2	3	3	0	0	0	2	1	3	2	3	3	0	0	0	2	1	3	2	3	3	0	0	0	30	30	30	22.494	200	200;224;224;224	0	5.0019	8.5	3.5	15
F6SXD2;D3Z0Y8;Q9CQX0	F6SXD2;D3Z0Y8;Q9CQX0	1;1;1	1;1;1	1;1;1	Ubiquitin thioesterase OTUB2	Otub2	tr|F6SXD2|F6SXD2_MOUSE ubiquitinyl hydrolase 1 (Fragment) OS=Mus musculus OX=10090 GN=Otub2 PE=1 SV=1;tr|D3Z0Y8|D3Z0Y8_MOUSE ubiquitinyl hydrolase 1 OS=Mus musculus OX=10090 GN=Otub2 PE=1 SV=1;sp|Q9CQX0|OTUB2_MOUSE Ubiquitin thioesterase OTUB2 OS=Mus muscu	3	1	1	1	0	1	0	0	0	0	0	0	0	0	1	0	0	0	0	0	0	0	0	1	0	0	0	0	0	0	0	9.2	9.2	9.2	15.913	142	142;323;234	0.0049628	1.8044	0	9.2	0
D3Z1F2;E9Q8M4;Q8R3P7;H3BLK7	D3Z1F2;E9Q8M4;Q8R3P7;H3BLK7	2;2;2;1	2;2;2;1	2;2;2;1	Clusterin-associated protein 1	Cluap1;Gm20695	tr|D3Z1F2|D3Z1F2_MOUSE Clusterin associated protein 1 (Fragment) OS=Mus musculus OX=10090 GN=Cluap1 PE=1 SV=9;tr|E9Q8M4|E9Q8M4_MOUSE Clusterin associated protein 1 (Fragment) OS=Mus musculus OX=10090 GN=Cluap1 PE=1 SV=1;sp|Q8R3P7|CLUA1_MOUSE Clusterin-asso	4	2	2	2	0	0	0	0	0	0	1	1	2	0	0	0	0	0	0	1	1	2	0	0	0	0	0	0	1	1	2	14.4	14.4	14.4	21.241	187	187;206;413;282	0	7.5714	0	0	0
E9Q7L3;D3Z1W6;E9Q7L2;D3Z1N4;E9Q4Y5;F8VQD1;Q8BSQ9;D3YYF2;D6RIL0;D6RI94;D3Z3R4;F6THL5	E9Q7L3;D3Z1W6;E9Q7L2;D3Z1N4;E9Q4Y5;F8VQD1;Q8BSQ9;D3YYF2;D6RIL0;D6RI94;D3Z3R4;F6THL5	10;10;10;10;10;10;10;9;7;7;7;7	10;10;10;10;10;10;10;9;7;7;7;7	10;10;10;10;10;10;10;9;7;7;7;7	Protein polybromo-1	Pbrm1	tr|E9Q7L3|E9Q7L3_MOUSE Polybromo 1 OS=Mus musculus OX=10090 GN=Pbrm1 PE=1 SV=1;tr|D3Z1W6|D3Z1W6_MOUSE Polybromo 1 OS=Mus musculus OX=10090 GN=Pbrm1 PE=1 SV=1;tr|E9Q7L2|E9Q7L2_MOUSE Polybromo 1 OS=Mus musculus OX=10090 GN=Pbrm1 PE=1 SV=1;tr|D3Z1N4|D3Z1N4_MO	12	10	10	10	0	0	0	0	0	0	6	10	8	0	0	0	0	0	0	6	10	8	0	0	0	0	0	0	6	10	8	7.1	7.1	7.1	182.12	1582	1582;1582;1597;1652;1689;1704;1634;1460;856;860;931;1085	0	15.473	0	0	0
D3Z1Z8;D3Z5N2;P54227	D3Z1Z8;D3Z5N2;P54227	1;1;1	1;1;1	1;1;1	Stathmin	Stmn1	tr|D3Z1Z8|D3Z1Z8_MOUSE Stathmin (Fragment) OS=Mus musculus OX=10090 GN=Stmn1 PE=1 SV=1;tr|D3Z5N2|D3Z5N2_MOUSE Stathmin OS=Mus musculus OX=10090 GN=Stmn1 PE=1 SV=1;sp|P54227|STMN1_MOUSE Stathmin OS=Mus musculus OX=10090 GN=Stmn1 PE=1 SV=2	3	1	1	1	1	1	1	1	1	1	0	0	0	1	1	1	1	1	1	0	0	0	1	1	1	1	1	1	0	0	0	12.7	12.7	12.7	11.729	102	102;147;149	0.00088222	2.3075	12.7	12.7	12.7
P30999;E9Q986;E9Q8Z6;E9Q8Z5;G3X9V2;E9Q904;E9Q901;E9Q903;D3Z2H2;E9Q8Z9;E9Q8Z4;E9Q905;E9Q907;E9Q906;D3Z7H6;E9Q8Z8;D3Z2H7	P30999;E9Q986;E9Q8Z6;E9Q8Z5;G3X9V2;E9Q904;E9Q901;E9Q903;D3Z2H2;E9Q8Z9;E9Q8Z4;E9Q905;E9Q907;E9Q906;D3Z7H6;E9Q8Z8;D3Z2H7	5;5;5;5;5;5;5;5;5;5;5;5;5;5;5;5;3	5;5;5;5;5;5;5;5;5;5;5;5;5;5;5;5;3	5;5;5;5;5;5;5;5;5;5;5;5;5;5;5;5;3	Catenin delta-1	Ctnnd1	sp|P30999|CTND1_MOUSE Catenin delta-1 OS=Mus musculus OX=10090 GN=Ctnnd1 PE=1 SV=2;tr|E9Q986|E9Q986_MOUSE Catenin (cadherin associated protein), delta 1 OS=Mus musculus OX=10090 GN=Ctnnd1 PE=1 SV=1;tr|E9Q8Z6|E9Q8Z6_MOUSE Catenin (cadherin associated protei	17	5	5	5	2	3	4	2	3	2	1	2	3	2	3	4	2	3	2	1	2	3	2	3	4	2	3	2	1	2	3	6	6	6	104.92	938	938;830;961;940;932;913;907;892;884;878;868;866;860;839;837;967;609	0	11.263	2.7	3.9	5.1
D3Z2H9;D3YVR0	D3Z2H9	17;2	17;2	0;0		Tpm3-rs7	tr|D3Z2H9|D3Z2H9_MOUSE Tropomyosin 3, related sequence 7 OS=Mus musculus OX=10090 GN=Tpm3-rs7 PE=1 SV=1	2	17	17	0	15	14	13	1	4	3	3	3	3	15	14	13	1	4	3	3	3	3	0	0	0	0	0	0	0	0	0	55.2	55.2	0	28.991	248	248;71	0	69.656	43.5	50.4	39.5
D3Z3A8;Q8C170	D3Z3A8;Q8C170	3;3	3;3	2;2	Unconventional myosin-IXa	Myo9a	tr|D3Z3A8|D3Z3A8_MOUSE Myosin IXa OS=Mus musculus OX=10090 GN=Myo9a PE=1 SV=1;sp|Q8C170|MYO9A_MOUSE Unconventional myosin-IXa OS=Mus musculus OX=10090 GN=Myo9a PE=1 SV=2	2	3	3	2	0	0	0	0	0	1	2	1	1	0	0	0	0	0	1	2	1	1	0	0	0	0	0	1	1	1	1	1	1	0.7	301.83	2631	2631;2542	0	3.4658	0	0	0
G3UXX5;D3Z7Q8;D3Z3D6;P52432	G3UXX5;D3Z7Q8;D3Z3D6;P52432	2;2;2;2	2;2;2;2	2;2;2;2	DNA-directed RNA polymerases I and III subunit RPAC1	Polr1c	tr|G3UXX5|G3UXX5_MOUSE Polymerase (RNA) I polypeptide C (Fragment) OS=Mus musculus OX=10090 GN=Polr1c PE=1 SV=1;tr|D3Z7Q8|D3Z7Q8_MOUSE Polymerase (RNA) I polypeptide C (Fragment) OS=Mus musculus OX=10090 GN=Polr1c PE=1 SV=2;tr|D3Z3D6|D3Z3D6_MOUSE Polymeras	4	2	2	2	0	0	0	0	0	0	0	1	2	0	0	0	0	0	0	0	1	2	0	0	0	0	0	0	0	1	2	17.1	17.1	17.1	19.379	170	170;255;260;346	0	5.2521	0	0	0
D3Z3J6;G3UYE5;F6Y616;Q8VE62;G3UZ67;G3UZH8	D3Z3J6;G3UYE5;F6Y616;Q8VE62	6;5;5;5;2;1	6;5;5;5;2;1	5;4;4;4;2;0	Polyadenylate-binding protein-interacting protein 1	Paip1	tr|D3Z3J6|D3Z3J6_MOUSE Polyadenylate binding protein-interacting protein 1 OS=Mus musculus OX=10090 GN=Paip1 PE=1 SV=1;tr|G3UYE5|G3UYE5_MOUSE Polyadenylate binding protein-interacting protein 1 OS=Mus musculus OX=10090 GN=Paip1 PE=1 SV=1;tr|F6Y616|F6Y616_M	6	6	6	5	0	0	0	1	1	1	4	6	6	0	0	0	1	1	1	4	6	6	0	0	0	1	1	1	4	5	5	21.3	21.3	16.1	42.06	367	367;410;484;400;189;207	0	27.331	0	0	0
D3Z3R3;P97930	D3Z3R3;P97930	1;1	1;1	1;1	Thymidylate kinase	Dtymk	tr|D3Z3R3|D3Z3R3_MOUSE dTMP kinase OS=Mus musculus OX=10090 GN=Dtymk PE=1 SV=1;sp|P97930|KTHY_MOUSE Thymidylate kinase OS=Mus musculus OX=10090 GN=Dtymk PE=1 SV=2	2	1	1	1	0	1	0	1	1	1	0	0	1	0	1	0	1	1	1	0	0	1	0	1	0	1	1	1	0	0	1	6.5	6.5	6.5	17.621	154	154;212	0.0098193	1.4736	0	6.5	0
D3Z3S1;Q9WUQ2	D3Z3S1;Q9WUQ2	1;1	1;1	1;1	Prolactin regulatory element-binding protein	Preb	tr|D3Z3S1|D3Z3S1_MOUSE Prolactin regulatory element-binding protein OS=Mus musculus OX=10090 GN=Preb PE=1 SV=1;sp|Q9WUQ2|PREB_MOUSE Prolactin regulatory element-binding protein OS=Mus musculus OX=10090 GN=Preb PE=1 SV=1	2	1	1	1	0	0	0	0	0	0	1	0	1	0	0	0	0	0	0	1	0	1	0	0	0	0	0	0	1	0	1	2.6	2.6	2.6	37.965	350	350;417	0.008706	1.5216	0	0	0
D3Z497;Q9WTZ1	D3Z497;Q9WTZ1	1;1	1;1	1;1	RING-box protein 2	Gm7075;Rnf7	tr|D3Z497|D3Z497_MOUSE Ring finger protein 7 like OS=Mus musculus OX=10090 GN=Rnf7l PE=3 SV=1;sp|Q9WTZ1|RBX2_MOUSE RING-box protein 2 OS=Mus musculus OX=10090 GN=Rnf7 PE=1 SV=1	2	1	1	1	0	0	0	0	1	1	1	0	1	0	0	0	0	1	1	1	0	1	0	0	0	0	1	1	1	0	1	10.7	10.7	10.7	12.652	112	112;113	0	4.9539	0	0	0
Q9EQ29;Q5QNR3;D3Z4K0	Q9EQ29;Q5QNR3;D3Z4K0	1;1;1	1;1;1	1;1;1		Ankrd36	tr|Q9EQ29|Q9EQ29_MOUSE Ankrd36 protein OS=Mus musculus OX=10090 GN=Ankrd36 PE=1 SV=1;tr|Q5QNR3|Q5QNR3_MOUSE Ankyrin repeat domain 36 (Fragment) OS=Mus musculus OX=10090 GN=Ankrd36 PE=1 SV=2;tr|D3Z4K0|D3Z4K0_MOUSE Ankyrin repeat domain 36 OS=Mus musculus OX	3	1	1	1	0	0	0	1	1	1	0	1	1	0	0	0	1	1	1	0	1	1	0	0	0	1	1	1	0	1	1	4	4	4	33.707	300	300;1261;1415	0.0098425	1.4839	0	0	0
D3Z4R3;Q80YS5	D3Z4R3;Q80YS5	1;1	1;1	1;1	Leucine-rich repeat-containing protein 27	Lrrc27	tr|D3Z4R3|D3Z4R3_MOUSE Leucine rich repeat containing 27 OS=Mus musculus OX=10090 GN=Lrrc27 PE=1 SV=1;sp|Q80YS5|LRC27_MOUSE Leucine-rich repeat-containing protein 27 OS=Mus musculus OX=10090 GN=Lrrc27 PE=2 SV=1	2	1	1	1	0	0	0	0	0	0	1	0	1	0	0	0	0	0	0	1	0	1	0	0	0	0	0	0	1	0	1	2.5	2.5	2.5	44.282	394	394;523	0.0049566	1.798	0	0	0
D3Z5I1;Q3UPF5;G3X9X5	D3Z5I1;Q3UPF5;G3X9X5	18;17;12	18;17;12	18;17;12	Zinc finger CCCH-type antiviral protein 1	Zc3hav1	tr|D3Z5I1|D3Z5I1_MOUSE Zinc finger CCCH type, antiviral 1 OS=Mus musculus OX=10090 GN=Zc3hav1 PE=1 SV=1;sp|Q3UPF5|ZCCHV_MOUSE Zinc finger CCCH-type antiviral protein 1 OS=Mus musculus OX=10090 GN=Zc3hav1 PE=1 SV=1;tr|G3X9X5|G3X9X5_MOUSE Zinc finger CCCH ty	3	18	18	18	0	0	0	12	10	13	11	8	5	0	0	0	12	10	13	11	8	5	0	0	0	12	10	13	11	8	5	21.7	21.7	21.7	112.53	996	996;946;673	0	44.132	0	0	0
Q9CXK9;D3Z5I9;F6RNF9	Q9CXK9;D3Z5I9;F6RNF9	2;2;1	2;2;1	2;2;1	RNA-binding protein 33	Rbm33	sp|Q9CXK9|RBM33_MOUSE RNA-binding protein 33 OS=Mus musculus OX=10090 GN=Rbm33 PE=1 SV=2;tr|D3Z5I9|D3Z5I9_MOUSE RNA binding motif protein 33 OS=Mus musculus OX=10090 GN=Rbm33 PE=1 SV=1;tr|F6RNF9|F6RNF9_MOUSE RNA binding motif protein 33 (Fragment) OS=Mus m	3	2	2	2	0	0	0	2	2	1	0	0	0	0	0	0	2	2	1	0	0	0	0	0	0	2	2	1	0	0	0	2.8	2.8	2.8	137.32	1231	1231;1191;383	0	3.816	0	0	0
D3Z5R4;E9Q2D0;P0C7L0	D3Z5R4;E9Q2D0;P0C7L0	2;2;2	2;2;2	2;2;2	WAS/WASL-interacting protein family member 3	Wipf3	tr|D3Z5R4|D3Z5R4_MOUSE WAS/WASL interacting protein family, member 3 OS=Mus musculus OX=10090 GN=Wipf3 PE=1 SV=1;tr|E9Q2D0|E9Q2D0_MOUSE WAS/WASL interacting protein family, member 3 OS=Mus musculus OX=10090 GN=Wipf3 PE=1 SV=1;sp|P0C7L0|WIPF3_MOUSE WAS/WASL	3	2	2	2	0	0	0	0	0	0	1	1	2	0	0	0	0	0	0	1	1	2	0	0	0	0	0	0	1	1	2	9.4	9.4	9.4	45.137	449	449;483;485	0	4.2341	0	0	0
D3Z624;E0CZ22	D3Z624;E0CZ22	3;3	3;3	3;3		Mroh1	tr|D3Z624|D3Z624_MOUSE Maestro heat-like repeat family member 1 OS=Mus musculus OX=10090 GN=Mroh1 PE=1 SV=2;tr|E0CZ22|E0CZ22_MOUSE Maestro heat-like repeat family member 1 OS=Mus musculus OX=10090 GN=Mroh1 PE=1 SV=1	2	3	3	3	0	3	1	2	0	1	2	2	0	0	3	1	2	0	1	2	2	0	0	3	1	2	0	1	2	2	0	2.7	2.7	2.7	122.19	1094	1094;1640	0	3.9152	0	2.7	0.7
P0C6F1;D3Z667;A0A140LHI3	P0C6F1;D3Z667	21;21;1	21;21;1	20;20;1	Dynein heavy chain 2, axonemal	Dnah2	sp|P0C6F1|DYH2_MOUSE Dynein axonemal heavy chain 2 OS=Mus musculus OX=10090 GN=Dnah2 PE=1 SV=1;tr|D3Z667|D3Z667_MOUSE Dynein, axonemal, heavy chain 2 OS=Mus musculus OX=10090 GN=Dnah2 PE=1 SV=1	3	21	21	20	0	0	0	1	3	1	10	12	13	0	0	0	1	3	1	10	12	13	0	0	0	1	2	1	9	11	12	6	6	5.8	511.56	4456	4456;4462;232	0	60.613	0	0	0
E2QRQ3;D3Z6D2;Q8CJ67	E2QRQ3;D3Z6D2;Q8CJ67	10;10;10	8;8;8	8;8;8	Double-stranded RNA-binding protein Staufen homolog 2	Stau2	tr|E2QRQ3|E2QRQ3_MOUSE Double-stranded RNA-binding protein Staufen homolog 2 OS=Mus musculus OX=10090 GN=Stau2 PE=1 SV=1;tr|D3Z6D2|D3Z6D2_MOUSE Double-stranded RNA-binding protein Staufen homolog 2 OS=Mus musculus OX=10090 GN=Stau2 PE=1 SV=1;sp|Q8CJ67|STAU	3	10	8	8	0	0	0	3	4	4	4	6	6	0	0	0	1	3	3	2	4	4	0	0	0	1	3	3	2	4	4	22.8	19.2	19.2	51.996	473	473;511;570	0	12.12	0	0	0
Q6PER3;D3Z6G3;A0A0J9YVB9	Q6PER3;D3Z6G3;A0A0J9YVB9	2;2;1	2;2;1	2;2;1	Microtubule-associated protein RP/EB family member 3	Mapre3	sp|Q6PER3|MARE3_MOUSE Microtubule-associated protein RP/EB family member 3 OS=Mus musculus OX=10090 GN=Mapre3 PE=1 SV=1;tr|D3Z6G3|D3Z6G3_MOUSE Microtubule-associated protein, RP/EB family, member 3 OS=Mus musculus OX=10090 GN=Mapre3 PE=1 SV=1;tr|A0A0J9YVB9	3	2	2	2	0	0	0	0	2	0	2	1	2	0	0	0	0	2	0	2	1	2	0	0	0	0	2	0	2	1	2	10	10	10	31.966	281	281;266;140	0	4.7361	0	0	0
D3Z6I8;E9Q7Q3	D3Z6I8;E9Q7Q3	17;17	3;3	3;3		Tpm3	tr|D3Z6I8|D3Z6I8_MOUSE Tropomyosin 3, gamma OS=Mus musculus OX=10090 GN=Tpm3 PE=1 SV=1;tr|E9Q7Q3|E9Q7Q3_MOUSE Tropomyosin 3, gamma OS=Mus musculus OX=10090 GN=Tpm3 PE=1 SV=1	2	17	3	3	13	15	12	1	4	3	3	3	3	1	3	1	0	0	0	0	0	0	1	3	1	0	0	0	0	0	0	50.6	6.1	6.1	28.723	247	247;248	0	5.356	38.9	49.4	37.7
D3Z6P9	D3Z6P9	25	25	25		Ddx43	tr|D3Z6P9|D3Z6P9_MOUSE RNA helicase OS=Mus musculus OX=10090 GN=Ddx43 PE=1 SV=1	1	25	25	25	3	2	3	15	14	14	16	14	16	3	2	3	15	14	14	16	14	16	3	2	3	15	14	14	16	14	16	42.7	42.7	42.7	72.271	646	646	0	91.588	5	3.4	5
Q3U1U6;D3Z6V5;Q9DA18	Q3U1U6;D3Z6V5;Q9DA18	2;2;1	2;2;1	2;2;1		Tsc22d4	tr|Q3U1U6|Q3U1U6_MOUSE Sperm acrosome developmental regulator OS=Mus musculus OX=10090 GN=Spacdr PE=1 SV=1;tr|D3Z6V5|D3Z6V5_MOUSE Sperm acrosome developmental regulator OS=Mus musculus OX=10090 GN=Spacdr PE=1 SV=1;tr|Q9DA18|Q9DA18_MOUSE Sperm acrosome deve	3	2	2	2	0	0	0	1	1	1	1	2	1	0	0	0	1	1	1	1	2	1	0	0	0	1	1	1	1	2	1	4.3	4.3	4.3	54.442	509	509;210;149	0	3.4932	0	0	0
D3Z720;Q8C262;A0A0U1RQ16;E9QAA8	D3Z720;Q8C262	17;12;2;1	17;12;2;1	17;12;2;1	Interferon-inducible GTPase 5	Irgc1;Irgc	tr|D3Z720|D3Z720_MOUSE Immunity-related GTPase family, cinema 1 OS=Mus musculus OX=10090 GN=Irgc1 PE=1 SV=1;sp|Q8C262|IIGP5_MOUSE Interferon-inducible GTPase 5 OS=Mus musculus OX=10090 GN=Irgc PE=1 SV=1	4	17	17	17	11	13	12	14	13	11	8	10	7	11	13	12	14	13	11	8	10	7	11	13	12	14	13	11	8	10	7	45.4	45.4	45.4	50.565	463	463;412;82;417	0	110.19	30.2	33.9	33
D3Z765	D3Z765	12	1	1		Luc7l	tr|D3Z765|D3Z765_MOUSE Luc7-like (Fragment) OS=Mus musculus OX=10090 GN=Luc7l PE=1 SV=1	1	12	1	1	3	0	1	4	3	4	11	8	9	1	0	1	0	0	1	1	0	0	1	0	1	0	0	1	1	0	0	53.5	7	7	20.113	172	172	0.0098348	1.4824	15.1	0	7
G3UZX6;H7BWX9;D3Z794;G3UZ60;G3UWI9;G3UWX9;G3UZA7;P61957;Q9Z172	G3UZX6;H7BWX9;D3Z794;G3UZ60;G3UWI9;G3UWX9;G3UZA7;P61957;Q9Z172	1;1;1;1;1;1;1;1;1	1;1;1;1;1;1;1;1;1	1;1;1;1;1;1;1;1;1	Small ubiquitin-related modifier;Small ubiquitin-related modifier 2;Small ubiquitin-related modifier 3	Sumo3;Sumo2	tr|G3UZX6|G3UZX6_MOUSE Small ubiquitin-like modifier 3 (Fragment) OS=Mus musculus OX=10090 GN=Sumo3 PE=4 SV=1;tr|H7BWX9|H7BWX9_MOUSE Small ubiquitin-like modifier 2 OS=Mus musculus OX=10090 GN=Sumo2 PE=1 SV=1;tr|D3Z794|D3Z794_MOUSE Small ubiquitin-like mod	9	1	1	1	0	0	1	0	0	0	0	0	0	0	0	1	0	0	0	0	0	0	0	0	1	0	0	0	0	0	0	25.5	25.5	25.5	5.2631	47	47;53;71;75;82;96;113;95;110	0.004906	1.7484	0	0	25.5
D3Z7C0;Q9Z2Q5	D3Z7C0;Q9Z2Q5	2;2	2;2	2;2	39S ribosomal protein L40, mitochondrial	Mrpl40	tr|D3Z7C0|D3Z7C0_MOUSE Large ribosomal subunit protein mL40 OS=Mus musculus OX=10090 GN=Mrpl40 PE=1 SV=1;sp|Q9Z2Q5|RM40_MOUSE Large ribosomal subunit protein mL40 OS=Mus musculus OX=10090 GN=Mrpl40 PE=1 SV=2	2	2	2	2	0	0	0	0	0	1	1	1	2	0	0	0	0	0	1	1	1	2	0	0	0	0	0	1	1	1	2	15.4	15.4	15.4	19.378	162	162;206	0	5.4594	0	0	0
D3Z7E5;Q2NL51	D3Z7E5;Q2NL51	4;4	2;2	2;2	Glycogen synthase kinase-3 alpha	Gsk3a	tr|D3Z7E5|D3Z7E5_MOUSE [tau protein] kinase OS=Mus musculus OX=10090 GN=Gsk3a PE=1 SV=1;sp|Q2NL51|GSK3A_MOUSE Glycogen synthase kinase-3 alpha OS=Mus musculus OX=10090 GN=Gsk3a PE=1 SV=2	2	4	2	2	0	0	0	1	1	1	1	1	1	0	0	0	1	0	0	1	1	1	0	0	0	1	0	0	1	1	1	9.9	6.4	6.4	51.245	486	486;490	0	7.5056	0	0	0
D3Z7Q5;P56812	D3Z7Q5;P56812	1;1	1;1	1;1	Programmed cell death protein 5	Pdcd5	tr|D3Z7Q5|D3Z7Q5_MOUSE Programmed cell death 5 OS=Mus musculus OX=10090 GN=Pdcd5 PE=1 SV=1;sp|P56812|PDCD5_MOUSE Programmed cell death protein 5 OS=Mus musculus OX=10090 GN=Pdcd5 PE=1 SV=3	2	1	1	1	0	0	0	1	0	0	0	0	0	0	0	0	1	0	0	0	0	0	0	0	0	1	0	0	0	0	0	6.3	6.3	6.3	21.985	205	205;126	0	3.0161	0	0	0
F6UV57;F6YCM8;F8WIH0;D3Z7V3;H7BX64;Q3URD3	F6UV57;F6YCM8;F8WIH0;D3Z7V3;H7BX64;Q3URD3	7;7;7;7;7;7	7;7;7;7;7;7	7;7;7;7;7;7	Sarcolemmal membrane-associated protein	Slmap	tr|F6UV57|F6UV57_MOUSE Sarcolemma associated protein (Fragment) OS=Mus musculus OX=10090 GN=Slmap PE=1 SV=1;tr|F6YCM8|F6YCM8_MOUSE Sarcolemma associated protein (Fragment) OS=Mus musculus OX=10090 GN=Slmap PE=1 SV=1;tr|F8WIH0|F8WIH0_MOUSE Sarcolemma associ	6	7	7	7	6	6	5	3	2	4	6	4	4	6	6	5	3	2	4	6	4	4	6	6	5	3	2	4	6	4	4	15.2	15.2	15.2	50.103	433	433;477;690;790;828;845	0	17.234	14.8	14.8	12.2
D3Z7V9;Q3TDT0;Q9R1R2	D3Z7V9;Q3TDT0;Q9R1R2	1;1;1	1;1;1	1;1;1	Tripartite motif-containing protein 3	Trim3	tr|D3Z7V9|D3Z7V9_MOUSE RING-type E3 ubiquitin transferase (Fragment) OS=Mus musculus OX=10090 GN=Trim3 PE=1 SV=8;tr|Q3TDT0|Q3TDT0_MOUSE RING-type E3 ubiquitin transferase OS=Mus musculus OX=10090 GN=Trim3 PE=1 SV=1;sp|Q9R1R2|TRIM3_MOUSE Tripartite motif-co	3	1	1	1	0	0	0	0	0	0	0	1	0	0	0	0	0	0	0	0	1	0	0	0	0	0	0	0	0	1	0	3.8	3.8	3.8	31.818	287	287;717;744	0.00090131	2.4511	0	0	0
G3X922;D4AFX7;A0A087WS25;A0A1L1STR9;A0A087WRC9;A0A087WSI0	G3X922;D4AFX7	38;38;3;2;2;1	38;38;3;2;2;1	38;38;3;2;2;1		Dnajc13	tr|G3X922|G3X922_MOUSE DnaJ heat shock protein family (Hsp40) member C13 OS=Mus musculus OX=10090 GN=Dnajc13 PE=1 SV=1;tr|D4AFX7|D4AFX7_MOUSE DnaJ heat shock protein family (Hsp40) member C13 OS=Mus musculus OX=10090 GN=Dnajc13 PE=1 SV=1	6	38	38	38	1	1	1	13	16	14	21	26	24	1	1	1	13	16	14	21	26	24	1	1	1	13	16	14	21	26	24	22.7	22.7	22.7	254.44	2243	2243;2248;184;96;174;59	0	152.29	0.6	0.7	0.8
G3UXH6;D6MZJ6	G3UXH6;D6MZJ6	1;1	1;1	1;1		Smpd5	tr|G3UXH6|G3UXH6_MOUSE sphingomyelin phosphodiesterase (Fragment) OS=Mus musculus OX=10090 GN=Smpd5 PE=1 SV=1;sp|D6MZJ6|NSMA5_MOUSE Sphingomyelin phosphodiesterase 5 OS=Mus musculus OX=10090 GN=Smpd5 PE=1 SV=1	2	1	1	1	0	0	0	0	0	0	1	1	1	0	0	0	0	0	0	1	1	1	0	0	0	0	0	0	1	1	1	9.4	9.4	9.4	12.736	117	117;483	0	4.5231	0	0	0
D6RE34;Q3U466	D6RE34;Q3U466	1;1	1;1	1;1		Cln6	tr|D6RE34|D6RE34_MOUSE Ceroid-lipofuscinosis, neuronal 6 OS=Mus musculus OX=10090 GN=Cln6 PE=1 SV=1;tr|Q3U466|Q3U466_MOUSE Ceroid-lipofuscinosis, neuronal 6 OS=Mus musculus OX=10090 GN=Cln6 PE=1 SV=1	2	1	1	1	1	1	1	1	0	1	1	1	1	1	1	1	1	0	1	1	1	1	1	1	1	1	0	1	1	1	1	42.5	42.5	42.5	4.31	40	40;308	0	15.308	42.5	42.5	42.5
D6REF7;Q8R0X7;D3YZT4;D3YY13;D3Z1Z3	D6REF7;Q8R0X7;D3YZT4	4;4;2;1;1	4;4;2;1;1	4;4;2;1;1	Sphingosine-1-phosphate lyase 1	Sgpl1	tr|D6REF7|D6REF7_MOUSE Sphingosine phosphate lyase 1 OS=Mus musculus OX=10090 GN=Sgpl1 PE=1 SV=1;sp|Q8R0X7|SGPL1_MOUSE Sphingosine-1-phosphate lyase 1 OS=Mus musculus OX=10090 GN=Sgpl1 PE=1 SV=1;tr|D3YZT4|D3YZT4_MOUSE Sphingosine phosphate lyase 1 (Fragmen	5	4	4	4	0	0	0	1	0	1	2	3	4	0	0	0	1	0	1	2	3	4	0	0	0	1	0	1	2	3	4	12.1	12.1	12.1	54.769	487	487;568;199;58;104	0	12.113	0	0	0
D6RG49;Q80XP8	D6RG49;Q80XP8	4;4	3;3	3;3	Protein FAM76B	Fam76b	tr|D6RG49|D6RG49_MOUSE Family with sequence similarity 76, member B OS=Mus musculus OX=10090 GN=Fam76b PE=1 SV=1;sp|Q80XP8|FA76B_MOUSE Protein FAM76B OS=Mus musculus OX=10090 GN=Fam76b PE=1 SV=1	2	4	3	3	0	0	0	0	1	0	3	3	4	0	0	0	0	1	0	3	2	3	0	0	0	0	1	0	3	2	3	16.7	12	12	26.649	233	233;339	0	6.0531	0	0	0
D6RG95;E9Q5K9	D6RG95;E9Q5K9	2;2	2;2	2;2	YTH domain-containing protein 1	Ythdc1	tr|D6RG95|D6RG95_MOUSE YTH domain-containing family protein OS=Mus musculus OX=10090 GN=Ythdc1 PE=1 SV=1;sp|E9Q5K9|YTDC1_MOUSE YTH domain-containing protein 1 OS=Mus musculus OX=10090 GN=Ythdc1 PE=1 SV=2	2	2	2	2	0	0	0	0	0	0	1	2	1	0	0	0	0	0	0	1	2	1	0	0	0	0	0	0	1	2	1	4.2	4.2	4.2	61.938	545	545;736	0.0071914	1.5945	0	0	0
D6RGM1;Q3UI84;Q99J62	D6RGM1;Q3UI84;Q99J62	1;1;1	1;1;1	1;1;1	Replication factor C subunit 4	Rfc4	tr|D6RGM1|D6RGM1_MOUSE Replication factor C (activator 1) 4 (Fragment) OS=Mus musculus OX=10090 GN=Rfc4 PE=1 SV=2;tr|Q3UI84|Q3UI84_MOUSE Replication factor C (activator 1) 4 OS=Mus musculus OX=10090 GN=Rfc4 PE=1 SV=1;sp|Q99J62|RFC4_MOUSE Replication factor	3	1	1	1	0	0	0	1	1	0	1	1	1	0	0	0	1	1	0	1	1	1	0	0	0	1	1	0	1	1	1	3.9	3.9	3.9	25.824	233	233;370;364	0.0072144	1.6167	0	0	0
D6RHN2;Q63836;P17563	D6RHN2;Q63836;P17563	1;1;1	1;1;1	1;1;1	Selenium-binding protein 2;Selenium-binding protein 1	Selenbp1;Selenbp2	tr|D6RHN2|D6RHN2_MOUSE Methanethiol oxidase OS=Mus musculus OX=10090 GN=Selenbp1 PE=1 SV=1;sp|Q63836|SBP2_MOUSE Selenium-binding protein 2 OS=Mus musculus OX=10090 GN=Selenbp2 PE=1 SV=2;sp|P17563|SBP1_MOUSE Methanethiol oxidase OS=Mus musculus OX=10090 GN=	3	1	1	1	1	1	1	0	1	0	0	0	0	1	1	1	0	1	0	0	0	0	1	1	1	0	1	0	0	0	0	8.1	8.1	8.1	13.666	123	123;472;472	0.0072231	1.6212	8.1	8.1	8.1
D6RIQ0;Q9CQJ7	D6RIQ0;Q9CQJ7	2;2	2;2	2;2	Securin	Pttg1	tr|D6RIQ0|D6RIQ0_MOUSE Pituitary tumor-transforming gene 1 OS=Mus musculus OX=10090 GN=Pttg1 PE=1 SV=1;sp|Q9CQJ7|PTTG1_MOUSE Securin OS=Mus musculus OX=10090 GN=Pttg1 PE=1 SV=1	2	2	2	2	0	0	0	1	1	1	2	2	2	0	0	0	1	1	1	2	2	2	0	0	0	1	1	1	2	2	2	20.5	20.5	20.5	13.233	122	122;199	0	8.607	0	0	0
E0CXD9;F7CH13;Q64310	E0CXD9;F7CH13;Q64310	2;2;2	2;2;2	2;2;2	Surfeit locus protein 4	Surf4	tr|E0CXD9|E0CXD9_MOUSE Surfeit locus protein 4 OS=Mus musculus OX=10090 GN=Surf4 PE=1 SV=1;tr|F7CH13|F7CH13_MOUSE Surfeit locus protein 4 (Fragment) OS=Mus musculus OX=10090 GN=Surf4 PE=1 SV=1;sp|Q64310|SURF4_MOUSE Surfeit locus protein 4 OS=Mus musculus O	3	2	2	2	1	1	1	1	1	2	1	1	1	1	1	1	1	1	2	1	1	1	1	1	1	1	1	2	1	1	1	25.6	25.6	25.6	9.5608	82	82;124;269	0	4.0598	15.9	15.9	15.9
E0CXJ5;E9Q945;E0CZ26	E0CXJ5;E9Q945;E0CZ26	1;1;1	1;1;1	1;1;1		Kctd18	tr|E0CXJ5|E0CXJ5_MOUSE Potassium channel tetramerisation domain containing 18 (Fragment) OS=Mus musculus OX=10090 GN=Kctd18 PE=1 SV=1;tr|E9Q945|E9Q945_MOUSE Potassium channel tetramerisation domain containing 18 OS=Mus musculus OX=10090 GN=Kctd18 PE=1 SV=1	3	1	1	1	0	0	0	1	1	1	1	1	1	0	0	0	1	1	1	1	1	1	0	0	0	1	1	1	1	1	1	6.1	6.1	6.1	19.461	179	179;262;429	0.0021598	2.1637	0	0	0
E0CXK6;Q9D9U9;E0CXK5;E0CXX0	E0CXK6;Q9D9U9;E0CXK5;E0CXX0	2;2;1;1	2;2;1;1	2;2;1;1		Cfap45	tr|E0CXK6|E0CXK6_MOUSE Cilia and flagella associated protein 45 (Fragment) OS=Mus musculus OX=10090 GN=Cfap45 PE=1 SV=8;sp|Q9D9U9|CFA45_MOUSE Cilia- and flagella-associated protein 45 OS=Mus musculus OX=10090 GN=Cfap45 PE=1 SV=1;tr|E0CXK5|E0CXK5_MOUSE Cili	4	2	2	2	0	0	0	0	0	0	2	0	0	0	0	0	0	0	0	2	0	0	0	0	0	0	0	0	2	0	0	18.6	18.6	18.6	18.489	161	161;551;128;134	0	3.5726	0	0	0
E0CXN5;P13707;D3Z0L6;Q3ULJ0	E0CXN5;P13707	3;3;1;1	3;3;1;1	3;3;1;1	Glycerol-3-phosphate dehydrogenase [NAD(+)];Glycerol-3-phosphate dehydrogenase [NAD(+)], cytoplasmic	Gpd1	tr|E0CXN5|E0CXN5_MOUSE Glycerol-3-phosphate dehydrogenase [NAD(+)] OS=Mus musculus OX=10090 GN=Gpd1 PE=1 SV=1;sp|P13707|GPDA_MOUSE Glycerol-3-phosphate dehydrogenase [NAD(+)], cytoplasmic OS=Mus musculus OX=10090 GN=Gpd1 PE=1 SV=3	4	3	3	3	1	1	1	1	0	1	1	0	0	1	1	1	1	0	1	1	0	0	1	1	1	1	0	1	1	0	0	8.6	8.6	8.6	35.231	326	326;349;117;351	0.00092251	2.6304	2.5	2.5	2.5
E0CZ84;E0CXR5;Q8K2Y9	E0CZ84;E0CXR5;Q8K2Y9	1;1;1	1;1;1	1;1;1	Cerebral cavernous malformations protein 2 homolog	Ccm2	tr|E0CZ84|E0CZ84_MOUSE Cerebral cavernous malformation 2 (Fragment) OS=Mus musculus OX=10090 GN=Ccm2 PE=1 SV=1;tr|E0CXR5|E0CXR5_MOUSE Cerebral cavernous malformation 2 (Fragment) OS=Mus musculus OX=10090 GN=Ccm2 PE=1 SV=1;sp|Q8K2Y9|CCM2_MOUSE Cerebral cave	3	1	1	1	0	0	0	0	0	0	0	0	1	0	0	0	0	0	0	0	0	1	0	0	0	0	0	0	0	0	1	15	15	15	12.47	113	113;243;453	0.0033941	2.0114	0	0	0
E0CXT7;F7B6Z5;M0QWM8	E0CXT7;F7B6Z5	17;10;2	17;10;2	2;0;0		Cpsf4	tr|E0CXT7|E0CXT7_MOUSE Cleavage and polyadenylation specificity factor subunit 4 OS=Mus musculus OX=10090 GN=Cpsf4 PE=1 SV=1;tr|F7B6Z5|F7B6Z5_MOUSE Cleavage and polyadenylation specificity factor subunit 4 (Fragment) OS=Mus musculus OX=10090 GN=Cpsf4 PE=1	3	17	17	2	0	0	0	13	12	13	14	15	14	0	0	0	13	12	13	14	15	14	0	0	0	2	2	2	2	2	2	69.1	69.1	10	30.255	269	269;208;62	0	188.68	0	0	0
E0CXZ1;J3QM95;F8WGT4;Q8BYN5	E0CXZ1;J3QM95;F8WGT4;Q8BYN5	5;5;5;5	5;5;5;5	5;5;5;5	FSD1-like protein	Fsd1l	tr|E0CXZ1|E0CXZ1_MOUSE Fibronectin type III and SPRY domain containing 1-like (Fragment) OS=Mus musculus OX=10090 GN=Fsd1l PE=1 SV=2;tr|J3QM95|J3QM95_MOUSE Fibronectin type III and SPRY domain containing 1-like OS=Mus musculus OX=10090 GN=Fsd1l PE=1 SV=1;t	4	5	5	5	0	0	0	0	0	0	2	2	4	0	0	0	0	0	0	2	2	4	0	0	0	0	0	0	2	2	4	13.6	13.6	13.6	55.339	493	493;497;504;507	0	7.7919	0	0	0
F7CTF8;E0CYB9;Q6PCP5;E0CYI3;F7BC60	F7CTF8;E0CYB9;Q6PCP5;E0CYI3	3;3;3;2;1	3;3;3;2;1	3;3;3;2;1	Mitochondrial fission factor	Mff	tr|F7CTF8|F7CTF8_MOUSE Mitochondrial fission factor (Fragment) OS=Mus musculus OX=10090 GN=Mff PE=1 SV=1;tr|E0CYB9|E0CYB9_MOUSE Mitochondrial fission factor OS=Mus musculus OX=10090 GN=Mff PE=1 SV=1;sp|Q6PCP5|MFF_MOUSE Mitochondrial fission factor OS=Mus m	5	3	3	3	0	0	0	0	1	1	2	2	3	0	0	0	0	1	1	2	2	3	0	0	0	0	1	1	2	2	3	25	25	25	24.791	220	220;316;291;243;137	0	7.2835	0	0	0
E0CYH0;Q9ER69;E0CZF5;A0A3B2W4D2;F7CCI4	E0CYH0;Q9ER69	3;3;1;1;1	3;3;1;1;1	3;3;1;1;1	Pre-mRNA-splicing regulator WTAP	Wtap	tr|E0CYH0|E0CYH0_MOUSE Pre-mRNA-splicing regulator WTAP OS=Mus musculus OX=10090 GN=Wtap PE=1 SV=1;sp|Q9ER69|FL2D_MOUSE Pre-mRNA-splicing regulator WTAP OS=Mus musculus OX=10090 GN=Wtap PE=1 SV=3	5	3	3	3	0	0	0	0	0	0	1	1	3	0	0	0	0	0	0	1	1	3	0	0	0	0	0	0	1	1	3	8.8	8.8	8.8	44.203	396	396;396;80;110;139	0	7.4024	0	0	0
E0CYI9;E9PWI6;Q8CHG3	E0CYI9;E9PWI6;Q8CHG3	1;1;1	1;1;1	1;1;1	GRIP and coiled-coil domain-containing protein 2	Gcc2	tr|E0CYI9|E0CYI9_MOUSE GRIP and coiled-coil domain containing 2 OS=Mus musculus OX=10090 GN=Gcc2 PE=1 SV=1;tr|E9PWI6|E9PWI6_MOUSE GRIP and coiled-coil domain containing 2 OS=Mus musculus OX=10090 GN=Gcc2 PE=1 SV=1;sp|Q8CHG3|GCC2_MOUSE GRIP and coiled-coil	3	1	1	1	0	0	0	0	0	0	0	1	0	0	0	0	0	0	0	0	1	0	0	0	0	0	0	0	0	1	0	0.6	0.6	0.6	183.01	1576	1576;1644;1680	0.006462	1.6727	0	0	0
F6V9F1;F7D432;E9PWE0;E0CYV0;P23506	F6V9F1;F7D432;E9PWE0;E0CYV0;P23506	1;1;1;1;1	1;1;1;1;1	1;1;1;1;1	Protein-L-isoaspartate O-methyltransferase;Protein-L-isoaspartate(D-aspartate) O-methyltransferase	Pcmt1	tr|F6V9F1|F6V9F1_MOUSE Protein-L-isoaspartate (D-aspartate) O-methyltransferase 1 (Fragment) OS=Mus musculus OX=10090 GN=Pcmt1 PE=1 SV=1;tr|F7D432|F7D432_MOUSE Protein-L-isoaspartate O-methyltransferase OS=Mus musculus OX=10090 GN=Pcmt1 PE=1 SV=1;tr|E9PWE0	5	1	1	1	1	0	0	1	0	0	0	0	0	1	0	0	1	0	0	0	0	0	1	0	0	1	0	0	0	0	0	9.6	9.6	9.6	18.823	177	177;271;285;286;227	0.0033913	2.0042	9.6	0	0
E0CZ72;P28740;F8VQ42;F6RLL5	E0CZ72;P28740;F8VQ42	30;30;27;1	30;30;27;1	26;26;23;1	Kinesin-like protein;Kinesin-like protein KIF2A	Kif2a	tr|E0CZ72|E0CZ72_MOUSE Kinesin-like protein OS=Mus musculus OX=10090 GN=Kif2a PE=1 SV=1;sp|P28740|KIF2A_MOUSE Kinesin-like protein KIF2A OS=Mus musculus OX=10090 GN=Kif2a PE=1 SV=2;tr|F8VQ42|F8VQ42_MOUSE Kinesin-like protein (Fragment) OS=Mus musculus OX=1	4	30	30	26	7	5	8	9	11	11	21	22	20	7	5	8	9	11	11	21	22	20	6	4	6	7	9	8	18	18	17	40.4	40.4	35	83.86	743	743;705;671;96	0	100.07	10	6.7	12.1
E0CZE0;Q8VBW6	E0CZE0;Q8VBW6	2;2	2;2	2;2	NEDD8-activating enzyme E1 regulatory subunit	Nae1	tr|E0CZE0|E0CZE0_MOUSE NEDD8-activating enzyme E1 regulatory subunit OS=Mus musculus OX=10090 GN=Nae1 PE=1 SV=1;sp|Q8VBW6|ULA1_MOUSE NEDD8-activating enzyme E1 regulatory subunit OS=Mus musculus OX=10090 GN=Nae1 PE=1 SV=1	2	2	2	2	1	1	2	0	0	0	0	0	0	1	1	2	0	0	0	0	0	0	1	1	2	0	0	0	0	0	0	4.1	4.1	4.1	57.619	510	510;534	0.0049302	1.7707	2.2	2.2	4.1
E9PUA2;Q5BLK4;A0A286YDD7;A0A286YCY9;A0A286YDR9;A0A286YD79	E9PUA2;Q5BLK4;A0A286YDD7	6;6;5;1;1;1	6;6;5;1;1;1	6;6;5;1;1;1	Terminal uridylyltransferase 7	Zcchc6	tr|E9PUA2|E9PUA2_MOUSE RNA uridylyltransferase OS=Mus musculus OX=10090 GN=Tut7 PE=1 SV=1;sp|Q5BLK4|TUT7_MOUSE Terminal uridylyltransferase 7 OS=Mus musculus OX=10090 GN=Tut7 PE=1 SV=3;tr|A0A286YDD7|A0A286YDD7_MOUSE RNA uridylyltransferase (Fragment) OS=Mu	6	6	6	6	0	0	0	4	4	1	1	3	4	0	0	0	4	4	1	1	3	4	0	0	0	4	4	1	1	3	4	5.4	5.4	5.4	167.15	1474	1474;1491;1089;90;149;210	0	12.752	0	0	0
Q9QWT9;E9PUA5;G3UX22	Q9QWT9;E9PUA5	3;3;1	3;3;1	3;3;1	Kinesin-like protein KIFC1;Kinesin-like protein	Kifc1;Kifc5b	sp|Q9QWT9|KIFC1_MOUSE Kinesin-like protein KIFC1 OS=Mus musculus OX=10090 GN=Kifc1 PE=1 SV=2;tr|E9PUA5|E9PUA5_MOUSE Kinesin-like protein OS=Mus musculus OX=10090 GN=Kifc5b PE=1 SV=1	3	3	3	3	0	0	0	1	0	2	0	0	1	0	0	0	1	0	2	0	0	1	0	0	0	1	0	2	0	0	1	5.9	5.9	5.9	74.152	674	674;672;79	0	3.2204	0	0	0
E9PUC2;Q9CZW4	E9PUC2;Q9CZW4	3;3	3;3	3;3	Long-chain-fatty-acid--CoA ligase 3	Acsl3	tr|E9PUC2|E9PUC2_MOUSE Acyl-CoA synthetase long-chain family member 3 OS=Mus musculus OX=10090 GN=Acsl3 PE=1 SV=1;sp|Q9CZW4|ACSL3_MOUSE Fatty acid CoA ligase Acsl3 OS=Mus musculus OX=10090 GN=Acsl3 PE=1 SV=2	2	3	3	3	0	1	1	2	1	0	2	1	0	0	1	1	2	1	0	2	1	0	0	1	1	2	1	0	2	1	0	7.6	7.6	7.6	62.975	568	568;720	0	5.5413	0	2.6	2.6
E9PUE1;Q8BSI6	E9PUE1;Q8BSI6	6;6	6;6	6;6	R3H and coiled-coil domain-containing protein 1	R3hcc1	tr|E9PUE1|E9PUE1_MOUSE R3H and coiled-coil domain-containing protein 1 OS=Mus musculus OX=10090 GN=R3hcc1 PE=1 SV=2;sp|Q8BSI6|R3HC1_MOUSE R3H and coiled-coil domain-containing protein 1 OS=Mus musculus OX=10090 GN=R3hcc1 PE=1 SV=3	2	6	6	6	0	0	0	3	3	3	1	2	1	0	0	0	3	3	3	1	2	1	0	0	0	3	3	3	1	2	1	13.1	13.1	13.1	54.145	488	488;488	0	6.0367	0	0	0
E9PUF4;A0A0R4J214	E9PUF4	24;7	1;0	1;0		Rbm26	tr|E9PUF4|E9PUF4_MOUSE RNA binding motif protein 26 OS=Mus musculus OX=10090 GN=Rbm26 PE=1 SV=1	2	24	1	1	0	0	2	9	9	8	14	20	18	0	0	0	0	0	0	1	1	0	0	0	0	0	0	0	1	1	0	25.2	3.4	3.4	111.01	983	983;210	0	12.816	0	0	3
E9PUF7;Q61210	E9PUF7;Q61210	1;1	1;1	1;1	Rho guanine nucleotide exchange factor 1	Arhgef1	tr|E9PUF7|E9PUF7_MOUSE Rho guanine nucleotide exchange factor (GEF) 1 OS=Mus musculus OX=10090 GN=Arhgef1 PE=1 SV=1;sp|Q61210|ARHG1_MOUSE Rho guanine nucleotide exchange factor 1 OS=Mus musculus OX=10090 GN=Arhgef1 PE=1 SV=2	2	1	1	1	0	0	0	0	0	1	1	1	1	0	0	0	0	0	1	1	1	1	0	0	0	0	0	1	1	1	1	2.2	2.2	2.2	108.69	976	976;920	0	8.3771	0	0	0
E9Q1M6;E9PUR0;F6SI14;F6RUI8;F7DE17	E9Q1M6;E9PUR0	8;8;2;2;2	3;3;1;2;2	3;3;1;2;2		Ankhd1	tr|E9Q1M6|E9Q1M6_MOUSE Ankyrin repeat and KH domain containing 1 OS=Mus musculus OX=10090 GN=Ankhd1 PE=1 SV=1;tr|E9PUR0|E9PUR0_MOUSE Ankyrin repeat and KH domain containing 1 OS=Mus musculus OX=10090 GN=Ankhd1 PE=1 SV=1	5	8	3	3	2	0	1	4	3	2	4	5	4	0	0	0	2	1	1	1	1	1	0	0	0	2	1	1	1	1	1	5.1	2	2	263.4	2485	2485;2548;219;637;1021	0	4.7467	1.3	0	0.5
E9PUW7;Q9EPK7	E9PUW7;Q9EPK7	1;1	1;1	1;1	Exportin-7	Xpo7	tr|E9PUW7|E9PUW7_MOUSE Exportin 7 OS=Mus musculus OX=10090 GN=Xpo7 PE=1 SV=1;sp|Q9EPK7|XPO7_MOUSE Exportin-7 OS=Mus musculus OX=10090 GN=Xpo7 PE=1 SV=3	2	1	1	1	1	0	1	0	0	0	0	0	0	1	0	1	0	0	0	0	0	0	1	0	1	0	0	0	0	0	0	1.4	1.4	1.4	123.9	1088	1088;1087	0	2.9942	1.4	0	1.4
E9PV12;G3X914;Q9D5V5;E9Q6Z0	E9PV12;G3X914;Q9D5V5;E9Q6Z0	18;18;18;16	18;18;18;16	18;18;18;16	Cullin-5	Cul5	tr|E9PV12|E9PV12_MOUSE Cullin 5 OS=Mus musculus OX=10090 GN=Cul5 PE=1 SV=2;tr|G3X914|G3X914_MOUSE Cullin 5 OS=Mus musculus OX=10090 GN=Cul5 PE=1 SV=1;sp|Q9D5V5|CUL5_MOUSE Cullin-5 OS=Mus musculus OX=10090 GN=Cul5 PE=1 SV=3;tr|E9Q6Z0|E9Q6Z0_MOUSE Cullin 5 O	4	18	18	18	3	1	2	8	6	7	15	11	10	3	1	2	8	6	7	15	11	10	3	1	2	8	6	7	15	11	10	26.6	26.6	26.6	87.783	753	753;855;780;651	0	60.168	4.5	1.6	2.9
E9PV44;O35143	E9PV44;O35143	3;3	3;3	3;3	ATPase inhibitor, mitochondrial	Atpif1	tr|E9PV44|E9PV44_MOUSE ATPase inhibitor, mitochondrial OS=Mus musculus OX=10090 GN=Atp5if1 PE=1 SV=1;sp|O35143|ATIF1_MOUSE ATPase inhibitor, mitochondrial OS=Mus musculus OX=10090 GN=Atp5if1 PE=1 SV=2	2	3	3	3	0	0	0	0	1	1	3	2	2	0	0	0	0	1	1	3	2	2	0	0	0	0	1	1	3	2	2	37.8	37.8	37.8	8.7887	74	74;106	0	4.4733	0	0	0
E9PV80;Q61026	E9PV80;Q61026	3;3	3;3	3;3	Nuclear receptor coactivator 2	Ncoa2	tr|E9PV80|E9PV80_MOUSE Nuclear receptor coactivator OS=Mus musculus OX=10090 GN=Ncoa2 PE=1 SV=1;sp|Q61026|NCOA2_MOUSE Nuclear receptor coactivator 2 OS=Mus musculus OX=10090 GN=Ncoa2 PE=1 SV=3	2	3	3	3	1	3	2	0	0	0	0	0	0	1	3	2	0	0	0	0	0	0	1	3	2	0	0	0	0	0	0	2.2	2.2	2.2	151.35	1393	1393;1462	0	3.9112	0.9	2.2	1.7
E9PVA8	E9PVA8	27	27	27		Gcn1l1	sp|E9PVA8|GCN1_MOUSE Stalled ribosome sensor GCN1 OS=Mus musculus OX=10090 GN=Gcn1 PE=1 SV=1	1	27	27	27	5	11	11	11	15	15	12	18	14	5	11	11	11	15	15	12	18	14	5	11	11	11	15	15	12	18	14	12.7	12.7	12.7	293.02	2671	2671	0	74.453	2.2	5	5.1
E9PVC5;E9Q770;D3YWM1;D3Z439;D6RCH1;D3YWY7;D3YWC6;A0A338P758;A0A0J9YUL1;A0A338P7C5;A0A0J9YU44;A0A0J9YTV0	E9PVC5;E9Q770	56;29;4;4;3;3;3;3;2;1;1;1	50;24;4;4;3;3;3;3;2;1;1;1	1;1;0;0;0;0;0;0;0;0;0;0		Eif4g1	tr|E9PVC5|E9PVC5_MOUSE Eukaryotic translation initiation factor 4, gamma 1 OS=Mus musculus OX=10090 GN=Eif4g1 PE=1 SV=1;tr|E9Q770|E9Q770_MOUSE Eukaryotic translation initiation factor 4, gamma 1 (Fragment) OS=Mus musculus OX=10090 GN=Eif4g1 PE=1 SV=1	12	56	50	1	6	3	1	37	39	44	39	41	37	4	3	1	31	34	38	34	36	32	0	0	0	1	1	1	1	1	1	37.8	34.9	0.6	175.46	1594	1594;958;202;209;79;170;186;188;129;61;119;137	0	323.31	4.2	2.5	0.8
E9PVP0;Q9JMD3;G3UW37;G3UY87;G3UYN6;G3UYM0;G3UY59	E9PVP0;Q9JMD3;G3UW37;G3UY87	4;3;2;2;1;1;1	4;3;2;2;1;1;1	4;3;2;2;1;1;1	PCTP-like protein	Stard10	tr|E9PVP0|E9PVP0_MOUSE START domain containing 10 OS=Mus musculus OX=10090 GN=Stard10 PE=1 SV=1;sp|Q9JMD3|STA10_MOUSE START domain-containing protein 10 OS=Mus musculus OX=10090 GN=Stard10 PE=1 SV=1;tr|G3UW37|G3UW37_MOUSE START domain containing 10 (Fragme	7	4	4	4	0	0	0	1	1	1	1	3	4	0	0	0	1	1	1	1	3	4	0	0	0	1	1	1	1	3	4	12.4	12.4	12.4	40.116	364	364;291;265;283;87;150;160	0	8.1266	0	0	0
E9PW20;Q9CY57;D3YZA1;D3Z7T7	E9PW20;Q9CY57;D3YZA1;D3Z7T7	6;6;5;5	6;6;5;5	6;6;5;5	Chromatin target of PRMT1 protein	Chtop	tr|E9PW20|E9PW20_MOUSE Chromatin target of PRMT1 OS=Mus musculus OX=10090 GN=Chtop PE=1 SV=1;sp|Q9CY57|CHTOP_MOUSE Chromatin target of PRMT1 protein OS=Mus musculus OX=10090 GN=Chtop PE=1 SV=2;tr|D3YZA1|D3YZA1_MOUSE Chromatin target of PRMT1 (Fragment) OS=	4	6	6	6	2	2	2	4	4	2	5	3	4	2	2	2	4	4	2	5	3	4	2	2	2	4	4	2	5	3	4	32.5	32.5	32.5	22.106	203	203;249;123;195	0	77.718	14.3	14.3	14.3
E9PWC8;E9PZR3;Q61183;E9QAN2;A0A0R4J244;E9QAY4;A1L349;Q9WVP6;E9PVN7;F6VTN8;E9Q5Z1;F7CXD5	E9PWC8;E9PZR3;Q61183;E9QAN2;A0A0R4J244;E9QAY4;A1L349;Q9WVP6	10;10;10;9;7;6;6;6;3;3;2;2	10;10;10;9;7;6;6;6;3;3;2;2	8;8;8;7;5;4;4;4;2;3;2;2	Poly(A) polymerase alpha;Poly(A) polymerase beta	Papola;Papolb	tr|E9PWC8|E9PWC8_MOUSE Poly(A) polymerase OS=Mus musculus OX=10090 GN=Papola PE=1 SV=1;tr|E9PZR3|E9PZR3_MOUSE Poly(A) polymerase OS=Mus musculus OX=10090 GN=Papola PE=1 SV=1;sp|Q61183|PAPOA_MOUSE Poly(A) polymerase alpha OS=Mus musculus OX=10090 GN=Papola	12	10	10	8	0	0	0	7	7	8	9	7	8	0	0	0	7	7	8	9	7	8	0	0	0	5	5	6	7	5	6	21.6	21.6	18.8	77.519	693	693;718;739;732;293;168;642;642;111;419;66;322	0	52.114	0	0	0
E9PWE8;Q3TT92;Q62188;Q6P1J1;P97427	E9PWE8;Q3TT92;Q62188	5;4;4;1;1	5;4;4;1;1	5;4;4;1;1	Dihydropyrimidinase-related protein 3	Dpysl3	tr|E9PWE8|E9PWE8_MOUSE Dihydropyrimidinase-like 3 OS=Mus musculus OX=10090 GN=Dpysl3 PE=1 SV=1;tr|Q3TT92|Q3TT92_MOUSE Dihydropyrimidinase-like 3 OS=Mus musculus OX=10090 GN=Dpysl3 PE=1 SV=1;sp|Q62188|DPYL3_MOUSE Dihydropyrimidinase-related protein 3 OS=Mus	5	5	5	5	1	1	1	1	2	3	0	1	0	1	1	1	1	2	3	0	1	0	1	1	1	1	2	3	0	1	0	7.8	7.8	7.8	73.884	683	683;568;570;686;572	0	5.3707	1	2.3	1
E9PWK1;Q9D379;F6YTS6;D3Z4M3	E9PWK1;Q9D379	6;6;2;1	6;6;2;1	6;6;2;1	Epoxide hydrolase 1	Ephx1	tr|E9PWK1|E9PWK1_MOUSE Epoxide hydrolase OS=Mus musculus OX=10090 GN=Ephx1 PE=1 SV=1;sp|Q9D379|HYEP_MOUSE Epoxide hydrolase 1 OS=Mus musculus OX=10090 GN=Ephx1 PE=1 SV=2	4	6	6	6	2	3	4	2	3	4	1	1	1	2	3	4	2	3	4	1	1	1	2	3	4	2	3	4	1	1	1	16.3	16.3	16.3	50.969	441	441;455;247;130	0	12.297	5.2	7.3	9.8
E9PWQ7	E9PWQ7	1	1	1		Zan	tr|E9PWQ7|E9PWQ7_MOUSE Zonadhesin OS=Mus musculus OX=10090 GN=Zan PE=1 SV=1	1	1	1	1	1	0	0	0	0	0	1	1	1	1	0	0	0	0	0	1	1	1	1	0	0	0	0	0	1	1	1	0.3	0.3	0.3	584.65	5420	5420	0	3.1935	0.3	0	0
E9PX09;Q6ZPS2	E9PX09;Q6ZPS2	1;1	1;1	1;1	Carnosine synthase 1	Carns1	tr|E9PX09|E9PX09_MOUSE Carnosine synthase 1 OS=Mus musculus OX=10090 GN=Carns1 PE=1 SV=1;sp|Q6ZPS2|CRNS1_MOUSE Carnosine synthase 1 OS=Mus musculus OX=10090 GN=Carns1 PE=1 SV=2	2	1	1	1	0	0	0	0	1	0	0	0	0	0	0	0	0	1	0	0	0	0	0	0	0	0	1	0	0	0	0	1.5	1.5	1.5	102.14	947	947;827	1	-2	0	0	0
F8WHY8;E9PX23;Q8K4B0	F8WHY8;E9PX23;Q8K4B0	2;2;2	2;2;2	1;1;1	Metastasis-associated protein MTA1	Mta1	tr|F8WHY8|F8WHY8_MOUSE Metastasis associated 1 OS=Mus musculus OX=10090 GN=Mta1 PE=1 SV=1;tr|E9PX23|E9PX23_MOUSE Metastasis associated 1 OS=Mus musculus OX=10090 GN=Mta1 PE=1 SV=1;sp|Q8K4B0|MTA1_MOUSE Metastasis-associated protein MTA1 OS=Mus musculus OX=1	3	2	2	1	0	0	0	1	1	1	1	1	2	0	0	0	1	1	1	1	1	2	0	0	0	1	1	1	0	1	1	3.2	3.2	1.7	79.189	698	698;703;715	0	2.8506	0	0	0
Q8BPM2;E9PX30;E9Q1T3	Q8BPM2;E9PX30;E9Q1T3	2;2;1	2;2;1	2;2;1	Mitogen-activated protein kinase kinase kinase kinase 5;Mitogen-activated protein kinase kinase kinase kinase	Map4k5	sp|Q8BPM2|M4K5_MOUSE Mitogen-activated protein kinase kinase kinase kinase 5 OS=Mus musculus OX=10090 GN=Map4k5 PE=1 SV=2;tr|E9PX30|E9PX30_MOUSE Mitogen-activated protein kinase kinase kinase kinase 5 OS=Mus musculus OX=10090 GN=Map4k5 PE=1 SV=1;tr|E9Q1T3|	3	2	2	2	0	0	0	0	0	0	1	1	2	0	0	0	0	0	0	1	1	2	0	0	0	0	0	0	1	1	2	3.2	3.2	3.2	95.044	847	847;847;780	0.0030069	2.109	0	0	0
F8VPX1;E9PXY8;Q6A4J8;G3UWR8;E0CY04	F8VPX1;E9PXY8;Q6A4J8	51;51;51;14;1	51;51;51;14;1	51;51;51;14;1	Ubiquitin carboxyl-terminal hydrolase;Ubiquitin carboxyl-terminal hydrolase 7	Usp7	tr|F8VPX1|F8VPX1_MOUSE Ubiquitin carboxyl-terminal hydrolase 7 OS=Mus musculus OX=10090 GN=Usp7 PE=1 SV=1;tr|E9PXY8|E9PXY8_MOUSE Ubiquitin carboxyl-terminal hydrolase 7 OS=Mus musculus OX=10090 GN=Usp7 PE=1 SV=1;sp|Q6A4J8|UBP7_MOUSE Ubiquitin carboxyl-term	5	51	51	51	4	4	3	20	20	20	41	41	40	4	4	3	20	20	20	41	41	40	4	4	3	20	20	20	41	41	40	51.9	51.9	51.9	128.47	1103	1103;1143;1103;327;92	0	323.31	3.3	4.9	3.8
E9PYC0;Q7TSH7	E9PYC0;Q7TSH7	1;1	1;1	1;1	Potassium voltage-gated channel subfamily F member 1	Kcnf1	tr|E9PYC0|E9PYC0_MOUSE Potassium voltage-gated channel subfamily F member 1 OS=Mus musculus OX=10090 GN=Kcnf1 PE=1 SV=1;sp|Q7TSH7|KCNF1_MOUSE Potassium voltage-gated channel subfamily F member 1 OS=Mus musculus OX=10090 GN=Kcnf1 PE=1 SV=1	2	1	1	1	0	0	0	0	0	0	1	0	0	0	0	0	0	0	0	1	0	0	0	0	0	0	0	0	1	0	0	3	3	3	56.774	505	505;493	1	-2	0	0	0
E9PYD1;F6S0H0;F6ZXW2;D3Z100;F7AR27;A0A1D5RM34;A0A5F8MPF3;A0A5F8MPN4;A0A5F8MPU7;Q8CJ19	E9PYD1;F6S0H0;F6ZXW2	12;8;6;4;2;1;1;1;1;1	12;8;6;4;2;1;1;1;1;1	12;8;6;4;2;1;1;1;1;1		Fam98c	tr|E9PYD1|E9PYD1_MOUSE Family with sequence similarity 98, member C OS=Mus musculus OX=10090 GN=Fam98c PE=1 SV=1;tr|F6S0H0|F6S0H0_MOUSE Family with sequence similarity 98, member C (Fragment) OS=Mus musculus OX=10090 GN=Fam98c PE=1 SV=1;tr|F6ZXW2|F6ZXW2_MO	10	12	12	12	1	2	2	11	9	10	11	10	11	1	2	2	11	9	10	11	10	11	1	2	2	11	9	10	11	10	11	38.4	38.4	38.4	37.271	344	344;259;213;142;135;1139;1968;2014;2044;1993	0	41.35	3.8	8.1	6.7
E9PYD5;P10711	E9PYD5;P10711	3;3	2;2	2;2	Transcription elongation factor A protein 1	Tcea1	tr|E9PYD5|E9PYD5_MOUSE Transcription elongation factor OS=Mus musculus OX=10090 GN=Tcea1 PE=1 SV=1;sp|P10711|TCEA1_MOUSE Transcription elongation factor A protein 1 OS=Mus musculus OX=10090 GN=Tcea1 PE=1 SV=2	2	3	2	2	0	0	0	1	1	1	2	2	3	0	0	0	0	0	0	2	1	2	0	0	0	0	0	0	2	1	2	11.5	8.3	8.3	35.031	312	312;301	0	2.7874	0	0	0
E9PYI4	E9PYI4	1	1	1		Mroh8	tr|E9PYI4|E9PYI4_MOUSE Maestro heat-like repeat family member 8 OS=Mus musculus OX=10090 GN=Mroh8 PE=1 SV=1	1	1	1	1	0	0	0	0	0	1	0	0	1	0	0	0	0	0	1	0	0	1	0	0	0	0	0	1	0	0	1	1.4	1.4	1.4	119.51	1049	1049	0	3.8189	0	0	0
E9Q973;E9PYU5;Q8R368	E9Q973;E9PYU5;Q8R368	2;2;2	2;2;2	2;2;2	Dyslexia susceptibility 1 candidate gene 1 protein homolog	Dyx1c1;Dyx1c1Ccpg1	tr|E9Q973|E9Q973_MOUSE Dynein axonemal assembly factor 4 OS=Mus musculus OX=10090 GN=Dnaaf4 PE=4 SV=1;tr|E9PYU5|E9PYU5_MOUSE Dynein axonemal assembly factor 4 OS=Mus musculus OX=10090 GN=Gm44503 PE=4 SV=1;sp|Q8R368|DAAF4_MOUSE Dynein axonemal assembly fact	3	2	2	2	0	0	0	0	0	1	1	1	2	0	0	0	0	0	1	1	1	2	0	0	0	0	0	1	1	1	2	8	8	8	34.055	300	300;387;420	0.003377	1.9567	0	0	0
E9PYY5	E9PYY5	3	3	3	WD repeat-containing protein 78	Wdr78	sp|E9PYY5|DNAI4_MOUSE Dynein axonemal intermediate chain 4 OS=Mus musculus OX=10090 GN=Dnai4 PE=1 SV=1	1	3	3	3	0	0	0	0	0	0	3	2	2	0	0	0	0	0	0	3	2	2	0	0	0	0	0	0	3	2	2	3.5	3.5	3.5	90.172	807	807	0.00091158	2.5359	0	0	0
E9PYZ7	E9PYZ7	26	1	1		Rbm26	tr|E9PYZ7|E9PYZ7_MOUSE RNA binding motif protein 26 OS=Mus musculus OX=10090 GN=Rbm26 PE=1 SV=1	1	26	1	1	0	0	1	10	10	7	14	21	20	0	0	0	0	0	0	0	1	1	0	0	0	0	0	0	0	1	1	26.1	2.5	2.5	113.8	1009	1009	0	4.1638	0	0	1.4
E9PZ21;Q91W59;G3UZJ9;A0A6I8MX12;Q8BWL5	E9PZ21;Q91W59	4;4;1;1;1	4;4;1;1;1	4;4;1;1;1	RNA-binding motif, single-stranded-interacting protein 1	Rbms1	tr|E9PZ21|E9PZ21_MOUSE RNA binding motif, single stranded interacting protein 1 OS=Mus musculus OX=10090 GN=Rbms1 PE=1 SV=1;sp|Q91W59|RBMS1_MOUSE RNA-binding motif, single-stranded-interacting protein 1 OS=Mus musculus OX=10090 GN=Rbms1 PE=1 SV=1	5	4	4	4	0	0	0	3	2	2	4	3	4	0	0	0	3	2	2	4	3	4	0	0	0	3	2	2	4	3	4	12.5	12.5	12.5	45.02	417	417;403;206;541;431	0	14.649	0	0	0
E9PZ50;F2Z429;P61407;A0A3B2W3Z0	E9PZ50;F2Z429;P61407;A0A3B2W3Z0	39;39;38;33	39;39;38;33	39;39;38;33	Tudor domain-containing protein 6	Tdrd6	tr|E9PZ50|E9PZ50_MOUSE Tudor domain containing 6 OS=Mus musculus OX=10090 GN=Tdrd6 PE=1 SV=2;tr|F2Z429|F2Z429_MOUSE Tudor domain containing 6 OS=Mus musculus OX=10090 GN=Tdrd6 PE=1 SV=2;sp|P61407|TDRD6_MOUSE Tudor domain-containing protein 6 OS=Mus musculu	4	39	39	39	13	12	12	29	29	26	26	26	27	13	12	12	29	29	26	26	26	27	13	12	12	29	29	26	26	26	27	23.9	23.9	23.9	238.01	2134	2134;2135;2134;1941	0	172.43	6.7	6.4	6.3
Q5NC80;E9PZF0;Q01768;P15532;Q5NC79	Q5NC80;E9PZF0;Q01768;P15532	3;3;3;3;1	3;3;3;3;1	3;3;3;3;1	Nucleoside diphosphate kinase;Nucleoside diphosphate kinase B;Nucleoside diphosphate kinase A	Nme1;Gm20390;Nme2	tr|Q5NC80|Q5NC80_MOUSE Nucleoside diphosphate kinase (Fragment) OS=Mus musculus OX=10090 GN=Nme1 PE=1 SV=1;tr|E9PZF0|E9PZF0_MOUSE Nucleoside diphosphate kinase OS=Mus musculus OX=10090 GN=Gm20390 PE=3 SV=1;sp|Q01768|NDKB_MOUSE Nucleoside diphosphate kinase	5	3	3	3	2	2	2	3	2	2	0	0	0	2	2	2	3	2	2	0	0	0	2	2	2	3	2	2	0	0	0	29.9	29.9	29.9	14.092	127	127;267;152;152;117	0	4.5586	16.5	16.5	16.5
E9PZJ8;A0A1W2P6I6	E9PZJ8	3;1	3;1	3;1	Activating signal cointegrator 1 complex subunit 3	Ascc3	sp|E9PZJ8|ASCC3_MOUSE Activating signal cointegrator 1 complex subunit 3 OS=Mus musculus OX=10090 GN=Ascc3 PE=1 SV=1	2	3	3	3	0	1	1	1	1	1	2	1	2	0	1	1	1	1	1	2	1	2	0	1	1	1	1	1	2	1	2	2	2	2	250.55	2198	2198;334	0	5.2905	0	0.5	0.5
E9Q027;Q8C5L3	E9Q027;Q8C5L3	1;1	1;1	1;1	CCR4-NOT transcription complex subunit 2	Cnot2	tr|E9Q027|E9Q027_MOUSE CCR4-NOT transcription complex, subunit 2 OS=Mus musculus OX=10090 GN=Cnot2 PE=1 SV=1;sp|Q8C5L3|CNOT2_MOUSE CCR4-NOT transcription complex subunit 2 OS=Mus musculus OX=10090 GN=Cnot2 PE=1 SV=2	2	1	1	1	1	1	1	1	1	1	1	1	1	1	1	1	1	1	1	1	1	1	1	1	1	1	1	1	1	1	1	3.2	3.2	3.2	54.92	499	499;540	0	3.7147	3.2	3.2	3.2
E9Q0C6	E9Q0C6	66	66	66		Gm14569	sp|E9Q0C6|K1210_MOUSE Acrosomal protein KIAA1210 OS=Mus musculus OX=10090 GN=Kiaa1210 PE=1 SV=1	1	66	66	66	30	34	26	54	47	50	46	48	49	30	34	26	54	47	50	46	48	49	30	34	26	54	47	50	46	48	49	44.3	44.3	44.3	181.03	1637	1637	0	323.31	23.8	23.9	18.2
E9Q175;E9PVU0	E9Q175;E9PVU0	60;59	60;59	1;1		Myo6	tr|E9Q175|E9Q175_MOUSE Unconventional myosin-VI OS=Mus musculus OX=10090 GN=Myo6 PE=1 SV=1;tr|E9PVU0|E9PVU0_MOUSE Unconventional myosin-VI OS=Mus musculus OX=10090 GN=Myo6 PE=1 SV=1	2	60	60	1	47	45	47	20	19	20	32	33	27	47	45	47	20	19	20	32	33	27	0	0	0	1	1	0	1	1	1	45.1	45.1	1.4	144.77	1253	1253;1266	0	323.31	38.5	35.9	39.7
E9Q1G8;E9Q9F5;O55131	E9Q1G8;E9Q9F5;O55131	13;13;13	12;12;12	12;12;12	Septin-7	2024-09-07	tr|E9Q1G8|E9Q1G8_MOUSE Septin OS=Mus musculus OX=10090 GN=Septin7 PE=1 SV=2;tr|E9Q9F5|E9Q9F5_MOUSE Septin OS=Mus musculus OX=10090 GN=Septin7 PE=1 SV=2;sp|O55131|SEPT7_MOUSE Septin-7 OS=Mus musculus OX=10090 GN=Septin7 PE=1 SV=1	3	13	12	12	4	3	3	5	4	4	10	9	10	3	2	2	4	3	3	9	8	9	3	2	2	4	3	3	9	8	9	33.9	33.9	33.9	50.648	437	437;437;436	0	108.26	12.1	6.9	6.4
E9Q1K1;Q6ZPR1;E9PZJ3;E9Q0S9	E9Q1K1;Q6ZPR1;E9PZJ3;E9Q0S9	6;6;3;3	6;6;3;3	6;6;3;3	Cilia- and flagella-associated protein 97	Cfap97	tr|E9Q1K1|E9Q1K1_MOUSE Cilia- and flagella-associated protein 97 OS=Mus musculus OX=10090 GN=Cfap97 PE=1 SV=1;sp|Q6ZPR1|CFA97_MOUSE Cilia- and flagella-associated protein 97 OS=Mus musculus OX=10090 GN=Cfap97 PE=1 SV=2;tr|E9PZJ3|E9PZJ3_MOUSE Cilia and flag	4	6	6	6	0	0	0	3	3	2	0	0	1	0	0	0	3	3	2	0	0	1	0	0	0	3	3	2	0	0	1	13.2	13.2	13.2	61.48	547	547;541;205;288	0	6.1166	0	0	0
E9Q284;Q5SU73	E9Q284;Q5SU73	2;2	2;2	2;2	Coilin	Coil	tr|E9Q284|E9Q284_MOUSE Coilin OS=Mus musculus OX=10090 GN=Coil PE=1 SV=1;sp|Q5SU73|COIL_MOUSE Coilin OS=Mus musculus OX=10090 GN=Coil PE=1 SV=1	2	2	2	2	0	0	0	0	0	0	1	1	2	0	0	0	0	0	0	1	1	2	0	0	0	0	0	0	1	1	2	5.1	5.1	5.1	62.262	573	573;570	0.0033855	1.9789	0	0	0
E9Q2E4;Q6GQX8	E9Q2E4	12;3	12;3	12;3		Gm15800	tr|E9Q2E4|E9Q2E4_MOUSE HECT domain E3 ubiquitin protein ligase 4 OS=Mus musculus OX=10090 GN=Hectd4 PE=1 SV=2	2	12	12	12	0	0	0	1	0	1	5	6	9	0	0	0	1	0	1	5	6	9	0	0	0	1	0	1	5	6	9	3.6	3.6	3.6	484.12	4418	4418;1014	0	32.501	0	0	0
Q8CG47;E9Q2X6;A0A0A6YXY3	Q8CG47;E9Q2X6	8;8;2	8;8;2	8;8;2	Structural maintenance of chromosomes protein 4;Structural maintenance of chromosomes protein	Smc4	sp|Q8CG47|SMC4_MOUSE Structural maintenance of chromosomes protein 4 OS=Mus musculus OX=10090 GN=Smc4 PE=1 SV=1;tr|E9Q2X6|E9Q2X6_MOUSE Structural maintenance of chromosomes protein OS=Mus musculus OX=10090 GN=Smc4 PE=1 SV=1	3	8	8	8	1	0	1	2	2	0	2	2	1	1	0	1	2	2	0	2	2	1	1	0	1	2	2	0	2	2	1	6.2	6.2	6.2	146.89	1286	1286;1261;109	0	7.8194	0.8	0	0.8
E9Q317;D3YY55;O55128;D3YY73;D3Z2N9	E9Q317;D3YY55;O55128	5;3;3;2;2	5;3;3;2;2	5;3;3;2;2	Histone deacetylase complex subunit SAP18	Gm10094;Sap18	tr|E9Q317|E9Q317_MOUSE Histone deacetylase complex subunit SAP18 OS=Mus musculus OX=10090 GN=Sap18b PE=1 SV=1;tr|D3YY55|D3YY55_MOUSE Sin3-associated polypeptide 18 OS=Mus musculus OX=10090 GN=Sap18 PE=1 SV=1;sp|O55128|SAP18_MOUSE Histone deacetylase comple	5	5	5	5	0	0	0	0	0	1	3	2	1	0	0	0	0	0	1	3	2	1	0	0	0	0	0	1	3	2	1	31.4	31.4	31.4	19.586	172	172;107;153;92;111	0	7.0788	0	0	0
Q80WG7;E9Q3A0;A0A494B9M7	Q80WG7;E9Q3A0;A0A494B9M7	2;2;1	2;2;1	2;2;1	E3 ubiquitin-protein ligase Trim36	Trim36	sp|Q80WG7|TRI36_MOUSE E3 ubiquitin-protein ligase Trim36 OS=Mus musculus OX=10090 GN=Trim36 PE=1 SV=2;tr|E9Q3A0|E9Q3A0_MOUSE Tripartite motif-containing 36 OS=Mus musculus OX=10090 GN=Trim36 PE=1 SV=1;tr|A0A494B9M7|A0A494B9M7_MOUSE Tripartite motif-contain	3	2	2	2	0	2	2	0	1	1	0	0	0	0	2	2	0	1	1	0	0	0	0	2	2	0	1	1	0	0	0	3.3	3.3	3.3	82.79	729	729;717;219	0	2.8752	0	3.3	3.3
E9Q3G8;A0A286YCP2	E9Q3G8	17;6	17;6	17;6		Nup153	tr|E9Q3G8|E9Q3G8_MOUSE Nucleoporin 153 OS=Mus musculus OX=10090 GN=Nup153 PE=1 SV=1	2	17	17	17	3	5	6	10	8	8	4	6	6	3	5	6	10	8	8	4	6	6	3	5	6	10	8	8	4	6	6	13.4	13.4	13.4	152.01	1462	1462;256	0	30.609	3.1	4.7	4.6
E9Q3N0;Q9Z129;D3Z6T0;F6S4D9	E9Q3N0;Q9Z129;D3Z6T0	4;4;2;1	4;4;2;1	4;4;2;1	ATP-dependent DNA helicase Q1	Recql	tr|E9Q3N0|E9Q3N0_MOUSE ATP-dependent DNA helicase OS=Mus musculus OX=10090 GN=Recql PE=1 SV=1;sp|Q9Z129|RECQ1_MOUSE ATP-dependent DNA helicase Q1 OS=Mus musculus OX=10090 GN=Recql PE=1 SV=2;tr|D3Z6T0|D3Z6T0_MOUSE RecQ protein-like (Fragment) OS=Mus musculu	4	4	4	4	0	0	0	0	0	0	2	2	2	0	0	0	0	0	0	2	2	2	0	0	0	0	0	0	2	2	2	7.6	7.6	7.6	71.3	634	634;648;167;235	0	7.653	0	0	0
E9Q6B3;G3UY29;E9Q3P9;F8WGS1;G3UZD3;P62492;P46638	E9Q6B3;G3UY29;E9Q3P9;F8WGS1;G3UZD3;P62492;P46638	1;1;1;1;1;1;1	1;1;1;1;1;1;1	1;1;1;1;1;1;1	Ras-related protein Rab-11A;Ras-related protein Rab-11B	Rab11a;Rab11b	tr|E9Q6B3|E9Q6B3_MOUSE RAB11A, member RAS oncogene family OS=Mus musculus OX=10090 GN=Rab11a PE=1 SV=1;tr|G3UY29|G3UY29_MOUSE RAB11B, member RAS oncogene family OS=Mus musculus OX=10090 GN=Rab11b PE=4 SV=1;tr|E9Q3P9|E9Q3P9_MOUSE RAB11A, member RAS oncogene	7	1	1	1	1	1	0	1	0	0	0	0	0	1	1	0	1	0	0	0	0	0	1	1	0	1	0	0	0	0	0	14	14	14	9.8419	86	86;149;153;155;193;216;218	0	2.8133	14	14	0
E9Q3W4;Q9QXS1;A0A3B2W7J8;E9PW24;A0A0R4J223;E9Q9J6;A0A0R4J221;A0A0R4J218	E9Q3W4;Q9QXS1	21;21;10;2;2;2;2;2	21;21;10;2;2;2;2;2	20;20;10;2;2;2;2;2	Plectin	Plec	tr|E9Q3W4|E9Q3W4_MOUSE Plectin OS=Mus musculus OX=10090 GN=Plec PE=1 SV=1;sp|Q9QXS1|PLEC_MOUSE Plectin OS=Mus musculus OX=10090 GN=Plec PE=1 SV=3	8	21	21	20	7	8	8	2	2	5	5	4	5	7	8	8	2	2	5	5	4	5	7	8	8	2	2	5	4	4	5	6.2	6.2	6	499.1	4386	4386;4691;1646;499;661;676;702;964	0	39.721	2.1	2.2	2
E9Q448;B7ZNL3	E9Q448;B7ZNL3	15;14	7;6	1;1		Tpm1	tr|E9Q448|E9Q448_MOUSE Tropomyosin 1, alpha OS=Mus musculus OX=10090 GN=Tpm1 PE=1 SV=1;tr|B7ZNL3|B7ZNL3_MOUSE Tpm1 protein OS=Mus musculus OX=10090 GN=Tpm1 PE=1 SV=1	2	15	7	1	11	10	13	1	2	1	2	2	2	4	4	6	0	0	0	0	0	0	1	1	0	0	0	0	0	0	0	39.4	21.5	3.5	32.776	284	284;284	0	13.614	26.8	30.3	31.3
E9Q453;G5E8R2;E9Q456;G5E8R0;G5E8R1;E9Q455;S4R261	E9Q453;G5E8R2;E9Q456;G5E8R0;G5E8R1;E9Q455	14;14;14;13;13;13;3	3;3;3;3;3;3;3	3;3;3;3;3;3;3		Tpm1	tr|E9Q453|E9Q453_MOUSE Tropomyosin 1, alpha OS=Mus musculus OX=10090 GN=Tpm1 PE=1 SV=1;tr|G5E8R2|G5E8R2_MOUSE Tropomyosin 1, alpha OS=Mus musculus OX=10090 GN=Tpm1 PE=1 SV=1;tr|E9Q456|E9Q456_MOUSE Tropomyosin 1, alpha OS=Mus musculus OX=10090 GN=Tpm1 PE=1	7	14	3	3	10	9	11	1	2	1	2	2	2	2	2	1	0	0	0	0	0	0	2	2	1	0	0	0	0	0	0	47.8	11.4	11.4	28.482	245	245;248;248;245;248;251;49	0	6.7623	29	34.7	35.9
E9Q4B1	E9Q4B1	27	1	1		Spert	tr|E9Q4B1|E9Q4B1_MOUSE Chibby family member 2 OS=Mus musculus OX=10090 GN=Cby2 PE=1 SV=1	1	27	1	1	1	1	1	1	1	1	25	22	22	0	0	0	0	0	0	1	0	0	0	0	0	0	0	0	1	0	0	60.1	2.1	2.1	48.692	419	419	0.006068	1.6789	2.1	2.1	2.1
P54310;E9Q4M2;A0A0U1RNR0	P54310;E9Q4M2;A0A0U1RNR0	2;2;1	2;2;1	2;2;1	Hormone-sensitive lipase	Lipe	sp|P54310|LIPS_MOUSE Hormone-sensitive lipase OS=Mus musculus OX=10090 GN=Lipe PE=1 SV=2;tr|E9Q4M2|E9Q4M2_MOUSE Hormone-sensitive lipase OS=Mus musculus OX=10090 GN=Lipe PE=1 SV=1;tr|A0A0U1RNR0|A0A0U1RNR0_MOUSE Hormone-sensitive lipase (Fragment) OS=Mus mu	3	2	2	2	0	0	0	0	0	0	1	1	1	0	0	0	0	0	0	1	1	1	0	0	0	0	0	0	1	1	1	4.7	4.7	4.7	83.347	759	759;1072;180	0	3.0042	0	0	0
E9Q4U7;Q6W4W7;O70566	E9Q4U7;Q6W4W7;O70566	5;5;5	5;5;5	5;5;5	Protein diaphanous homolog 2	Diap2;Diaph2	tr|E9Q4U7|E9Q4U7_MOUSE Diaphanous related formin 2 OS=Mus musculus OX=10090 GN=Diaph2 PE=1 SV=1;tr|Q6W4W7|Q6W4W7_MOUSE DIA3 OS=Mus musculus OX=10090 GN=Diaph2 PE=1 SV=1;sp|O70566|DIAP2_MOUSE Protein diaphanous homolog 2 OS=Mus musculus OX=10090 GN=Diaph2 P	3	5	5	5	0	0	0	0	0	1	2	2	4	0	0	0	0	0	1	2	2	4	0	0	0	0	0	1	2	2	4	5.3	5.3	5.3	125.41	1102	1102;1102;1098	0	7.8879	0	0	0
E9Q4V2;Q96EQ9	E9Q4V2;Q96EQ9	2;2	2;2	2;2	Histone-lysine N-methyltransferase PRDM9	Prdm9	tr|E9Q4V2|E9Q4V2_MOUSE Histone-lysine N-methyltransferase OS=Mus musculus OX=10090 GN=Prdm9 PE=2 SV=1;sp|Q96EQ9|PRDM9_MOUSE Histone-lysine N-methyltransferase PRDM9 OS=Mus musculus OX=10090 GN=Prdm9 PE=1 SV=2	2	2	2	2	0	0	0	0	0	0	1	0	2	0	0	0	0	0	0	1	0	2	0	0	0	0	0	0	1	0	2	17.1	17.1	17.1	97.786	847	847;843	0.00090457	2.4885	0	0	0
E9Q4X2;F6YNY8;G3UXP5;F6X3X7	E9Q4X2	37;14;5;2	37;14;5;2	35;14;4;2		Uggt2	tr|E9Q4X2|E9Q4X2_MOUSE UDP-glucose glycoprotein glucosyltransferase 2 OS=Mus musculus OX=10090 GN=Uggt2 PE=1 SV=1	4	37	37	35	0	0	1	10	9	11	30	19	28	0	0	1	10	9	11	30	19	28	0	0	1	9	8	10	28	19	27	25.8	25.8	24.4	172.76	1504	1504;466;216;106	0	110.47	0	0	0.7
F6R3T1;E9Q4Y8	F6R3T1;E9Q4Y8	3;3	3;3	3;3		8030474K03Rik	tr|F6R3T1|F6R3T1_MOUSE RIKEN cDNA 8030474K03 gene OS=Mus musculus OX=10090 GN=8030474K03Rik PE=1 SV=2;tr|E9Q4Y8|E9Q4Y8_MOUSE RIKEN cDNA 8030474K03 gene OS=Mus musculus OX=10090 GN=8030474K03Rik PE=1 SV=2	2	3	3	3	0	0	0	2	1	2	2	1	3	0	0	0	2	1	2	2	1	3	0	0	0	2	1	2	2	1	3	8.8	8.8	8.8	57.746	546	546;554	0	7.4376	0	0	0
E9Q4Z2;D3Z0B3	E9Q4Z2	99;8	80;2	80;2	Acetyl-CoA carboxylase 2;Biotin carboxylase	Acacb	sp|E9Q4Z2|ACACB_MOUSE Acetyl-CoA carboxylase 2 OS=Mus musculus OX=10090 GN=Acacb PE=1 SV=1	2	99	80	80	76	75	77	61	62	56	50	49	47	60	58	61	44	45	40	33	32	32	60	58	61	44	45	40	33	32	32	39.5	31.9	31.9	275.75	2448	2448;146	0	281.57	32.8	32.8	32.1
E9QNH6;E9Q580;Q7TQD7;P46735;D3YV80;O88329	E9QNH6;E9Q580;Q7TQD7;P46735	19;19;19;19;6;1	19;19;19;19;6;1	19;19;19;19;6;1	Unconventional myosin-Ib	Myo1b	tr|E9QNH6|E9QNH6_MOUSE Myosin IB OS=Mus musculus OX=10090 GN=Myo1b PE=1 SV=1;tr|E9Q580|E9Q580_MOUSE Myosin IB OS=Mus musculus OX=10090 GN=Myo1b PE=1 SV=1;tr|Q7TQD7|Q7TQD7_MOUSE Myo1b protein OS=Mus musculus OX=10090 GN=Myo1b PE=1 SV=1;sp|P46735|MYO1B_MOUSE	6	19	19	19	11	12	14	1	1	2	4	5	4	11	12	14	1	1	2	4	5	4	11	12	14	1	1	2	4	5	4	23.3	23.3	23.3	125.03	1078	1078;1084;1136;1107;299;1043	0	32.034	10.9	13	15.2
E9Q586;D3YX34;E9Q3M3;O08788;D3Z2M9;D3YYG9	E9Q586;D3YX34;E9Q3M3;O08788	18;17;17;17;1;1	18;17;17;17;1;1	18;17;17;17;1;1	Dynactin subunit 1	Dctn1	tr|E9Q586|E9Q586_MOUSE Dynactin subunit 1 OS=Mus musculus OX=10090 GN=Dctn1 PE=1 SV=1;tr|D3YX34|D3YX34_MOUSE Dynactin 1 OS=Mus musculus OX=10090 GN=Dctn1 PE=1 SV=1;tr|E9Q3M3|E9Q3M3_MOUSE Dynactin subunit 1 OS=Mus musculus OX=10090 GN=Dctn1 PE=1 SV=1;sp|O08	6	18	18	18	14	12	11	7	7	6	8	8	7	14	12	11	7	7	6	8	8	7	14	12	11	7	7	6	8	8	7	20.1	20.1	20.1	136.85	1239	1239;1142;1264;1281;159;189	0	79.987	13.6	12.5	11.1
E9Q591;Q3SYJ2	E9Q591;Q3SYJ2	4;4	4;4	4;4		Prr27	tr|E9Q591|E9Q591_MOUSE Proline rich 27 OS=Mus musculus OX=10090 GN=Prr27 PE=1 SV=1;tr|Q3SYJ2|Q3SYJ2_MOUSE 4930432K09Rik protein OS=Mus musculus OX=10090 GN=Prr27 PE=1 SV=1	2	4	4	4	2	3	2	3	3	3	3	3	3	2	3	2	3	3	3	3	3	3	2	3	2	3	3	3	3	3	3	32.6	32.6	32.6	36.263	344	344;352	0	58.939	12.8	25	19.5
E9Q5D9;F8WH23;Q61581	E9Q5D9;F8WH23;Q61581	2;2;2	2;2;2	2;2;2	Insulin-like growth factor-binding protein 7	Igfbp7	tr|E9Q5D9|E9Q5D9_MOUSE Insulin-like growth factor binding protein 7 OS=Mus musculus OX=10090 GN=Igfbp7 PE=1 SV=2;tr|F8WH23|F8WH23_MOUSE Insulin-like growth factor-binding protein 7 OS=Mus musculus OX=10090 GN=Igfbp7 PE=1 SV=1;sp|Q61581|IBP7_MOUSE Insulin-l	3	2	2	2	0	0	0	0	0	0	1	1	1	0	0	0	0	0	0	1	1	1	0	0	0	0	0	0	1	1	1	11.5	11.5	11.5	32.672	312	312;282;281	0	3.8842	0	0	0
E9Q5J9;A0A0R4J1P2;P21107	E9Q5J9;A0A0R4J1P2;P21107	14;11;11	1;1;1	1;1;1	Tropomyosin alpha-3 chain	Tpm3	tr|E9Q5J9|E9Q5J9_MOUSE Tropomyosin 3, gamma OS=Mus musculus OX=10090 GN=Tpm3 PE=1 SV=1;tr|A0A0R4J1P2|A0A0R4J1P2_MOUSE Tropomyosin 3, gamma OS=Mus musculus OX=10090 GN=Tpm3 PE=1 SV=1;sp|P21107|TPM3_MOUSE Tropomyosin alpha-3 chain OS=Mus musculus OX=10090 GN	3	14	1	1	11	10	11	1	2	1	2	2	2	0	0	1	0	0	0	0	0	0	0	0	1	0	0	0	0	0	0	42.5	4.9	4.9	33.28	285	285;284;285	0.00090171	2.4534	27.7	33.7	29.1
E9Q5M4;F6VRB4	E9Q5M4;F6VRB4	2;1	2;1	2;1		Zfr2	tr|E9Q5M4|E9Q5M4_MOUSE Zinc finger RNA binding protein 2 OS=Mus musculus OX=10090 GN=Zfr2 PE=1 SV=1;tr|F6VRB4|F6VRB4_MOUSE Zinc finger RNA binding protein 2 (Fragment) OS=Mus musculus OX=10090 GN=Zfr2 PE=1 SV=1	2	2	2	2	0	0	0	1	0	0	2	1	1	0	0	0	1	0	0	2	1	1	0	0	0	1	0	0	2	1	1	2.7	2.7	2.7	94.974	874	874;178	0	3.0474	0	0	0
E9Q5W2	E9Q5W2	2	2	2		Spata31d1d	tr|E9Q5W2|E9Q5W2_MOUSE Spermatogenesis associated 31 subfamily D, member 1D OS=Mus musculus OX=10090 GN=Spata31d1d PE=1 SV=1	1	2	2	2	0	0	0	1	1	2	1	1	1	0	0	0	1	1	2	1	1	1	0	0	0	1	1	2	1	1	1	2	2	2	136.96	1247	1247	0	6.1266	0	0	0
E9Q616;A0A494BBD5	E9Q616	25;1	25;1	25;1		Ahnak	tr|E9Q616|E9Q616_MOUSE AHNAK nucleoprotein (desmoyokin) OS=Mus musculus OX=10090 GN=Ahnak PE=1 SV=1	2	25	25	25	4	4	3	2	1	1	15	12	18	4	4	3	2	1	1	15	12	18	4	4	3	2	1	1	15	12	18	18.8	18.8	18.8	604.25	5656	5656;311	0	73.95	7.1	6.7	6.5
E9Q640;Q6NZN0	E9Q640;Q6NZN0	26;26	24;24	0;0	RNA-binding protein 26	Rbm26	tr|E9Q640|E9Q640_MOUSE RNA binding motif protein 26 OS=Mus musculus OX=10090 GN=Rbm26 PE=1 SV=1;sp|Q6NZN0|RBM26_MOUSE RNA-binding protein 26 OS=Mus musculus OX=10090 GN=Rbm26 PE=1 SV=2	2	26	24	0	0	0	2	11	11	8	15	21	20	0	0	2	11	10	8	15	19	19	0	0	0	0	0	0	0	0	0	26.6	25.3	0	112.66	1001	1001;1012	0	72.738	0	0	2.9
Q3UIX4;F6RDI8;E9Q6E5;D3Z4B0;F6TN80;D6RE22;A0A0G2JEG1;F6X2U6	Q3UIX4;F6RDI8;E9Q6E5;D3Z4B0;F6TN80;D6RE22	6;6;6;4;3;3;2;1	6;6;6;4;3;3;2;1	6;6;6;4;3;3;2;1		Srsf11	tr|Q3UIX4|Q3UIX4_MOUSE Serine and arginine-rich splicing factor 11 OS=Mus musculus OX=10090 GN=Srsf11 PE=1 SV=1;tr|F6RDI8|F6RDI8_MOUSE Serine and arginine-rich splicing factor 11 (Fragment) OS=Mus musculus OX=10090 GN=Srsf11 PE=1 SV=1;tr|E9Q6E5|E9Q6E5_MOUS	8	6	6	6	0	0	0	1	1	1	5	6	6	0	0	0	1	1	1	5	6	6	0	0	0	1	1	1	5	6	6	17.9	17.9	17.9	53.102	476	476;500;511;192;101;112;175;53	0	43.649	0	0	0
E9Q6K1;O08811;F6YA33;D3Z700	E9Q6K1;O08811;F6YA33;D3Z700	6;6;4;3	6;6;4;3	6;6;4;3	TFIIH basal transcription factor complex helicase XPD subunit	Ercc2	tr|E9Q6K1|E9Q6K1_MOUSE General transcription and DNA repair factor IIH helicase subunit XPD OS=Mus musculus OX=10090 GN=Ercc2 PE=1 SV=1;sp|O08811|ERCC2_MOUSE General transcription and DNA repair factor IIH helicase subunit XPD OS=Mus musculus OX=10090 GN=E	4	6	6	6	1	1	1	2	2	1	3	6	5	1	1	1	2	2	1	3	6	5	1	1	1	2	2	1	3	6	5	11.9	11.9	11.9	84.406	739	739;760;684;508	0	40.025	3.4	3.4	3.4
E9Q6M7;Q3TTW5;Q80U78;F6YD01;Q3TQ29;Q3UR91;Q80U58	E9Q6M7;Q3TTW5;Q80U78	3;3;3;1;1;1;1	3;3;3;1;1;1;1	3;3;3;1;1;1;1	Pumilio homolog 1	Pum1	tr|E9Q6M7|E9Q6M7_MOUSE Pumilio RNA-binding family member 1 OS=Mus musculus OX=10090 GN=Pum1 PE=1 SV=1;tr|Q3TTW5|Q3TTW5_MOUSE Pumilio RNA-binding family member 1 OS=Mus musculus OX=10090 GN=Pum1 PE=1 SV=1;sp|Q80U78|PUM1_MOUSE Pumilio homolog 1 OS=Mus muscul	7	3	3	3	2	2	1	1	2	2	0	0	1	2	2	1	1	2	2	0	0	1	2	2	1	1	2	2	0	0	1	4.2	4.2	4.2	100.36	944	944;1092;1189;222;980;1064;1066	0	6.5304	2.1	3.1	2.1
E9Q6R3;O08547;D6RES2;A0A0G2JF08	E9Q6R3;O08547	3;3;1;1	3;3;1;1	3;3;1;1	Vesicle-trafficking protein SEC22b	Sec22b	tr|E9Q6R3|E9Q6R3_MOUSE SEC22 homolog B, vesicle trafficking protein OS=Mus musculus OX=10090 GN=Sec22b PE=1 SV=1;sp|O08547|SC22B_MOUSE Vesicle-trafficking protein SEC22b OS=Mus musculus OX=10090 GN=Sec22b PE=1 SV=3	4	3	3	3	3	3	3	2	2	2	1	2	2	3	3	3	2	2	2	1	2	2	3	3	3	2	2	2	1	2	2	20.5	20.5	20.5	18.922	166	166;215;42;62	0	15.31	20.5	20.5	20.5
E9Q7E2;Q9D982	E9Q7E2	11;2	11;2	11;2		Arid2	sp|E9Q7E2|ARID2_MOUSE AT-rich interactive domain-containing protein 2 OS=Mus musculus OX=10090 GN=Arid2 PE=1 SV=1	2	11	11	11	0	0	0	1	0	1	7	8	7	0	0	0	1	0	1	7	8	7	0	0	0	1	0	1	7	8	7	7	7	7	195.99	1828	1828;145	0	19.316	0	0	0
E9Q7G0;A0A1B0GT61;A0A1B0GSW3;F6ZQA3	E9Q7G0	5;2;2;1	5;2;2;1	5;2;2;1		Numa1	sp|E9Q7G0|NUMA1_MOUSE Nuclear mitotic apparatus protein 1 OS=Mus musculus OX=10090 GN=Numa1 PE=1 SV=1	4	5	5	5	0	0	0	3	2	2	2	3	3	0	0	0	3	2	2	2	3	3	0	0	0	3	2	2	2	3	3	3.2	3.2	3.2	235.63	2094	2094;875;1082;741	0	12.215	0	0	0
E9Q7N8;F7CTY2;E0CZ32;E0CYN4;E0CY94	E9Q7N8;F7CTY2;E0CZ32;E0CYN4;E0CY94	10;8;7;7;7	10;8;7;7;7	1;1;0;0;0		Zfp346	tr|E9Q7N8|E9Q7N8_MOUSE Zinc finger protein 346 OS=Mus musculus OX=10090 GN=Zfp346 PE=1 SV=1;tr|F7CTY2|F7CTY2_MOUSE Zinc finger protein 346 (Fragment) OS=Mus musculus OX=10090 GN=Zfp346 PE=1 SV=1;tr|E0CZ32|E0CZ32_MOUSE Zinc finger protein 346 OS=Mus musculu	5	10	10	1	0	0	0	7	6	6	6	6	6	0	0	0	7	6	6	6	6	6	0	0	0	1	1	1	1	1	1	35.6	35.6	5.8	34.321	309	309;238;132;135;151	0	168.65	0	0	0
E9Q7P1	E9Q7P1	1	1	1		Col22a1	tr|E9Q7P1|E9Q7P1_MOUSE Collagen, type XXII, alpha 1 OS=Mus musculus OX=10090 GN=Col22a1 PE=1 SV=1	1	1	1	1	0	0	0	1	1	1	0	1	1	0	0	0	1	1	1	0	1	1	0	0	0	1	1	1	0	1	1	0.9	0.9	0.9	159.94	1613	1613	0.0034072	2.0481	0	0	0
E9QNU1;E9Q7Q8;A0A0R4J1M9;A0A0R4J1Q4;A0A0R4J1N4;Q8R2G4;E9Q1U7;E9Q9Q8;E9Q8Z0;E9Q7Z7;F6RER8;E9Q984;E9Q630;F6W3A0;F6Z2C7	E9QNU1;E9Q7Q8;A0A0R4J1M9;A0A0R4J1Q4;A0A0R4J1N4;Q8R2G4;E9Q1U7;E9Q9Q8;E9Q8Z0;E9Q7Z7;F6RER8;E9Q984	13;13;12;12;12;12;11;10;10;10;10;9;6;2;1	13;13;12;12;12;12;11;10;10;10;10;9;6;2;1	13;13;12;12;12;12;11;10;10;10;10;9;6;2;1	Ecto-ADP-ribosyltransferase 3	Art3	tr|E9QNU1|E9QNU1_MOUSE NAD(P)(+)--arginine ADP-ribosyltransferase OS=Mus musculus OX=10090 GN=Art3 PE=1 SV=1;tr|E9Q7Q8|E9Q7Q8_MOUSE NAD(P)(+)--arginine ADP-ribosyltransferase OS=Mus musculus OX=10090 GN=Art3 PE=1 SV=1;tr|A0A0R4J1M9|A0A0R4J1M9_MOUSE NAD(P)(	15	13	13	13	10	9	10	10	6	6	11	11	9	10	9	10	10	6	6	11	11	9	10	9	10	10	6	6	11	11	9	43.2	43.2	43.2	42.179	373	373;383;365;375;408;371;244;192;206;215;310;178;108;142;84	0	181.24	26.5	32.2	32.4
E9Q852;E9Q9C3;Q9QZQ1;E9PYX7;A0A668KLE6;F7C3I9	E9Q852;E9Q9C3;Q9QZQ1;E9PYX7	7;7;7;6;1;1	7;7;7;6;1;1	7;7;7;6;1;1	Afadin	Mllt4	tr|E9Q852|E9Q852_MOUSE Afadin, adherens junction formation factor OS=Mus musculus OX=10090 GN=Afdn PE=1 SV=2;tr|E9Q9C3|E9Q9C3_MOUSE Afadin, adherens junction formation factor OS=Mus musculus OX=10090 GN=Afdn PE=1 SV=1;sp|Q9QZQ1|AFAD_MOUSE Afadin OS=Mus mus	6	7	7	7	0	0	0	0	0	0	3	5	4	0	0	0	0	0	0	3	5	4	0	0	0	0	0	0	3	5	4	6	6	6	204.52	1805	1805;1827;1820;1663;87;380	0	39.966	0	0	0
E9Q8D0	E9Q8D0	14	14	14		Dnajc21	sp|E9Q8D0|DJC21_MOUSE DnaJ homolog subfamily C member 21 OS=Mus musculus OX=10090 GN=Dnajc21 PE=1 SV=1	1	14	14	14	0	0	0	1	2	2	13	10	9	0	0	0	1	2	2	13	10	9	0	0	0	1	2	2	13	10	9	27.5	27.5	27.5	61.734	531	531	0	115.29	0	0	0
E9Q8I7;A2AEI5;A2AEI4;E9Q3K1;F7AR15;E9PZN0;Q80SZ6	E9Q8I7;A2AEI5;A2AEI4;E9Q3K1;F7AR15;E9PZN0;Q80SZ6	2;1;1;1;1;1;1	2;1;1;1;1;1;1	2;1;1;1;1;1;1		Nfxl1;Nxf7	tr|E9Q8I7|E9Q8I7_MOUSE Nuclear transcription factor, X-box binding-like 1 OS=Mus musculus OX=10090 GN=Nfxl1 PE=1 SV=1;tr|A2AEI5|A2AEI5_MOUSE Nuclear RNA export factor 7 (Fragment) OS=Mus musculus OX=10090 GN=Nxf7 PE=1 SV=1;tr|A2AEI4|A2AEI4_MOUSE Nuclear RN	7	2	2	2	0	0	0	0	0	0	1	0	1	0	0	0	0	0	0	1	0	1	0	0	0	0	0	0	1	0	1	3.2	3.2	3.2	101.51	918	918;127;155;346;475;500;620	0	5.8472	0	0	0
Q6ZPZ3;E9Q8K8;A0A1B0GRU3	Q6ZPZ3;E9Q8K8;A0A1B0GRU3	11;11;10	11;11;10	11;11;10	Zinc finger CCCH domain-containing protein 4	Zc3h4	sp|Q6ZPZ3|ZC3H4_MOUSE Zinc finger CCCH domain-containing protein 4 OS=Mus musculus OX=10090 GN=Zc3h4 PE=1 SV=2;tr|E9Q8K8|E9Q8K8_MOUSE Zinc finger CCCH-type containing 4 OS=Mus musculus OX=10090 GN=Zc3h4 PE=1 SV=1;tr|A0A1B0GRU3|A0A1B0GRU3_MOUSE Zinc finger	3	11	11	11	0	0	0	0	0	0	6	9	7	0	0	0	0	0	0	6	9	7	0	0	0	0	0	0	6	9	7	16	16	16	140.97	1304	1304;1255;1180	0	49.716	0	0	0
E9Q8L9;Q9D620;A0A1B0GRJ0	E9Q8L9;Q9D620;A0A1B0GRJ0	7;7;5	7;7;5	6;6;5	Rab11 family-interacting protein 1	Rab11fip1	tr|E9Q8L9|E9Q8L9_MOUSE RAB11 family interacting protein 1 (class I) OS=Mus musculus OX=10090 GN=Rab11fip1 PE=1 SV=1;sp|Q9D620|RFIP1_MOUSE Rab11 family-interacting protein 1 OS=Mus musculus OX=10090 GN=Rab11fip1 PE=1 SV=2;tr|A0A1B0GRJ0|A0A1B0GRJ0_MOUSE RAB1	3	7	7	6	0	0	1	1	1	1	5	6	5	0	0	1	1	1	1	5	6	5	0	0	1	0	0	0	4	5	4	6.7	6.7	5.7	125.02	1166	1166;645;1127	0	19.53	0	0	0.7
E9Q8N5;Q08EB6;Q08EB5;F7DCH5;Q8BRT1;A0A1L1ST22;A0A1L1SRY3;Q8BSE7	E9Q8N5;Q08EB6;Q08EB5;F7DCH5;Q8BRT1;A0A1L1ST22	4;4;4;4;4;2;1;1	2;2;2;2;2;1;1;1	2;2;2;2;2;1;1;1	CLIP-associating protein 2	Clasp2	tr|E9Q8N5|E9Q8N5_MOUSE CLIP associating protein 2 OS=Mus musculus OX=10090 GN=Clasp2 PE=1 SV=1;tr|Q08EB6|Q08EB6_MOUSE CLIP associating protein 2 OS=Mus musculus OX=10090 GN=Clasp2 PE=1 SV=1;tr|Q08EB5|Q08EB5_MOUSE CLIP associating protein 2 OS=Mus musculus	8	4	2	2	0	0	0	2	3	4	3	3	3	0	0	0	0	1	2	1	1	1	0	0	0	0	1	2	1	1	1	4.4	2	2	140.72	1286	1286;1287;1304;1307;1286;600;103;400	0	6.904	0	0	0
E9Q9E1;Q6NZJ6;E9PVC6;A0A0J9YUS5;A0A0J9YUC1;A0A0J9YVC1	E9Q9E1;Q6NZJ6;E9PVC6;A0A0J9YUS5	56;56;55;51;27;26	1;1;1;1;1;1	1;1;1;1;1;1	Eukaryotic translation initiation factor 4 gamma 1	Eif4g1	tr|E9Q9E1|E9Q9E1_MOUSE Eukaryotic translation initiation factor 4, gamma 1 OS=Mus musculus OX=10090 GN=Eif4g1 PE=1 SV=1;sp|Q6NZJ6|IF4G1_MOUSE Eukaryotic translation initiation factor 4 gamma 1 OS=Mus musculus OX=10090 GN=Eif4g1 PE=1 SV=1;tr|E9PVC6|E9PVC6_M	6	56	1	1	7	3	1	37	39	43	39	41	37	1	0	0	1	1	0	1	1	1	1	0	0	1	1	0	1	1	1	37.7	0.5	0.5	175.33	1593	1593;1600;1553;1303;900;795	0.0049241	1.766	4.7	2.5	0.8
E9Q9G8;Q6NWV3;S4R282	E9Q9G8;Q6NWV3	14;13;1	14;13;1	14;13;1	Intraflagellar transport protein 122 homolog	Ift122	tr|E9Q9G8|E9Q9G8_MOUSE Intraflagellar transport 122 OS=Mus musculus OX=10090 GN=Ift122 PE=1 SV=2;sp|Q6NWV3|IF122_MOUSE Intraflagellar transport protein 122 homolog OS=Mus musculus OX=10090 GN=Ift122 PE=1 SV=1	3	14	14	14	5	6	6	4	6	5	6	6	8	5	6	6	4	6	5	6	6	8	5	6	6	4	6	5	6	6	8	12.7	12.7	12.7	141.6	1241	1241;1182;209	0	57.608	4.7	5.7	6.1
E9Q9L3;Q8R4U7	E9Q9L3;Q8R4U7	1;1	1;1	1;1	Leucine zipper protein 1	Luzp1	tr|E9Q9L3|E9Q9L3_MOUSE Leucine zipper protein 1 (Fragment) OS=Mus musculus OX=10090 GN=Luzp1 PE=1 SV=8;sp|Q8R4U7|LUZP1_MOUSE Leucine zipper protein 1 OS=Mus musculus OX=10090 GN=Luzp1 PE=1 SV=2	2	1	1	1	0	0	0	1	0	0	0	0	0	0	0	0	1	0	0	0	0	0	0	0	0	1	0	0	0	0	0	19.7	19.7	19.7	7.5482	66	66;1068	0.00089566	2.4125	0	0	0
E9Q9M2	E9Q9M2	1	1	1		Cdk14	tr|E9Q9M2|E9Q9M2_MOUSE Cyclin-dependent kinase 14 (Fragment) OS=Mus musculus OX=10090 GN=Cdk14 PE=1 SV=8	1	1	1	1	1	1	1	1	1	0	1	0	1	1	1	1	1	1	0	1	0	1	1	1	1	1	1	0	1	0	1	4.2	4.2	4.2	18.497	167	167	0	3.293	4.2	4.2	4.2
Q8VCQ8;E9QA16;S4R1T7;E9Q0M9;D3Z6I7;E9QA15;E9Q9F3;F6QLP8;F6ZAW1;F6RGN9;F6T2Z7	Q8VCQ8;E9QA16;S4R1T7;E9Q0M9;D3Z6I7;E9QA15	9;9;8;8;8;8;3;3;2;1;1	9;9;8;8;8;8;3;3;2;1;1	9;9;8;8;8;8;3;3;2;1;1		Cald1	tr|Q8VCQ8|Q8VCQ8_MOUSE Caldesmon 1 OS=Mus musculus OX=10090 GN=Cald1 PE=1 SV=1;tr|E9QA16|E9QA16_MOUSE Caldesmon 1 OS=Mus musculus OX=10090 GN=Cald1 PE=1 SV=1;tr|S4R1T7|S4R1T7_MOUSE Caldesmon 1 OS=Mus musculus OX=10090 GN=Cald1 PE=1 SV=1;tr|E9Q0M9|E9Q0M9_MO	11	9	9	9	4	2	2	0	1	0	6	5	4	4	2	2	0	1	0	6	5	4	4	2	2	0	1	0	6	5	4	19.4	19.4	19.4	60.452	530	530;536;534;534;554;768;253;274;211;137;354	0	19.591	11.3	5.7	5.1
Q9D9J2;E9QA37;A0A2R8W6F3	Q9D9J2;E9QA37	7;7;2	7;7;2	7;7;2	Testis-expressed sequence 33 protein	Tex33	sp|Q9D9J2|CMIP4_MOUSE Ciliary microtubule inner protein 4 OS=Mus musculus OX=10090 GN=Cimip4 PE=1 SV=1;tr|E9QA37|E9QA37_MOUSE Testis expressed 33 OS=Mus musculus OX=10090 GN=Cimip4 PE=1 SV=1	3	7	7	7	4	4	1	6	2	5	5	5	6	4	4	1	6	2	5	5	5	6	4	4	1	6	2	5	5	5	6	29.3	29.3	29.3	30.227	266	266;241;135	0	33.431	16.9	16.2	4.5
F7A4M1;E9QA45;Q3UJK4	F7A4M1;E9QA45;Q3UJK4	1;1;1	1;1;1	1;1;1	GTP-binding protein 2	Gtpbp2	tr|F7A4M1|F7A4M1_MOUSE GTP binding protein 2 (Fragment) OS=Mus musculus OX=10090 GN=Gtpbp2 PE=1 SV=1;tr|E9QA45|E9QA45_MOUSE GTP binding protein 2 OS=Mus musculus OX=10090 GN=Gtpbp2 PE=1 SV=1;sp|Q3UJK4|GTPB2_MOUSE GTP-binding protein 2 OS=Mus musculus OX=10	3	1	1	1	0	0	0	1	1	0	0	0	0	0	0	0	1	1	0	0	0	0	0	0	0	1	1	0	0	0	0	5.5	5.5	5.5	27.829	253	253;604;602	0.00091199	2.5373	0	0	0
E9QA57;E9QA35	E9QA57;E9QA35	4;2	4;2	4;2		Spata31d1b;Spata31d1a	tr|E9QA57|E9QA57_MOUSE Spermatogenesis associated 31 subfamily D, member 1B OS=Mus musculus OX=10090 GN=Spata31d1b PE=1 SV=1;tr|E9QA35|E9QA35_MOUSE Spermatogenesis associated 31 subfamily D, member 1A OS=Mus musculus OX=10090 GN=Spata31d1a PE=1 SV=1	2	4	4	4	0	0	0	2	2	1	1	1	1	0	0	0	2	2	1	1	1	1	0	0	0	2	2	1	1	1	1	4	4	4	149.7	1361	1361;1336	0	23.131	0	0	0
E9QAE3	E9QAE3	13	13	13		Btaf1	tr|E9QAE3|E9QAE3_MOUSE B-TFIID TATA-box binding protein associated factor 1 OS=Mus musculus OX=10090 GN=Btaf1 PE=1 SV=1	1	13	13	13	5	5	4	6	6	5	7	8	7	5	5	4	6	6	5	7	8	7	5	5	4	6	6	5	7	8	7	8.9	8.9	8.9	207.05	1848	1848	0	35.9	3.1	3.5	2.6
E9QAQ5;Q9WV60	E9QAQ5;Q9WV60	5;5	5;5	3;3	Glycogen synthase kinase-3 beta	Gsk3b	tr|E9QAQ5|E9QAQ5_MOUSE [tau protein] kinase OS=Mus musculus OX=10090 GN=Gsk3b PE=1 SV=1;sp|Q9WV60|GSK3B_MOUSE Glycogen synthase kinase-3 beta OS=Mus musculus OX=10090 GN=Gsk3b PE=1 SV=2	2	5	5	3	0	0	0	2	2	3	2	3	1	0	0	0	2	2	3	2	3	1	0	0	0	2	1	2	2	3	1	14.1	14.1	10.2	47.989	433	433;420	0	5.4992	0	0	0
E9QAS4;E9QAS5;Q6PDQ2;E9PYU4;E9PYL1;A2A8L1;F6WR45;F7C528;E9Q614;B1AR17;A0A5F8MQ82;F6V4V3	E9QAS4;E9QAS5;Q6PDQ2	17;17;17;8;8;8;5;5;5;5;2;1	17;17;17;8;8;8;5;5;5;5;2;1	17;17;17;8;8;8;5;5;5;5;2;1	Chromodomain-helicase-DNA-binding protein 4	Chd4	tr|E9QAS4|E9QAS4_MOUSE DNA helicase OS=Mus musculus OX=10090 GN=Chd4 PE=1 SV=1;tr|E9QAS5|E9QAS5_MOUSE DNA helicase OS=Mus musculus OX=10090 GN=Chd4 PE=1 SV=1;sp|Q6PDQ2|CHD4_MOUSE Chromodomain-helicase-DNA-binding protein 4 OS=Mus musculus OX=10090 GN=Chd4	12	17	17	17	1	1	1	1	1	2	11	14	14	1	1	1	1	1	2	11	14	14	1	1	1	1	1	2	11	14	14	10.1	10.1	10.1	216.37	1902	1902;1922;1915;1915;1952;1946;444;1886;2021;2055;385;197	0	48.87	0.7	0.7	0.7
E9QAT0;Q6AXB7;P35922;E9QAS8	E9QAT0;Q6AXB7;P35922;E9QAS8	39;38;38;36	35;34;34;32	2;2;2;2	Fragile X mental retardation protein 1 homolog	Fmr1	tr|E9QAT0|E9QAT0_MOUSE Fragile X messenger ribonucleoprotein 1 OS=Mus musculus OX=10090 GN=Fmr1 PE=1 SV=1;tr|Q6AXB7|Q6AXB7_MOUSE Fragile X mental retardation syndrome 1 homolog OS=Mus musculus OX=10090 GN=Fmr1 PE=1 SV=1;sp|P35922|FMR1_MOUSE Fragile X messe	4	39	35	2	4	4	2	5	5	7	32	34	31	2	2	1	4	4	5	28	31	28	0	0	0	1	1	1	2	2	2	72.3	68.1	5.4	66.169	589	589;614;614;631	0	323.31	7.6	7.6	3.9
E9QAT4;F7BPW6	E9QAT4;F7BPW6	11;6	11;6	11;6		Sec16a	sp|E9QAT4|SC16A_MOUSE Protein transport protein Sec16A OS=Mus musculus OX=10090 GN=Sec16a PE=1 SV=1;tr|F7BPW6|F7BPW6_MOUSE Protein transport protein sec16 (Fragment) OS=Mus musculus OX=10090 GN=Sec16a PE=1 SV=1	2	11	11	11	0	0	1	4	3	7	2	2	1	0	0	1	4	3	7	2	2	1	0	0	1	4	3	7	2	2	1	6.9	6.9	6.9	254.2	2357	2357;907	0	33.543	0	0	0.5
Q68FL6;E9QB02;F6W0G8	Q68FL6;E9QB02	42;42;7	42;42;7	42;42;7	Methionine--tRNA ligase, cytoplasmic	Mars	sp|Q68FL6|SYMC_MOUSE Methionine--tRNA ligase, cytoplasmic OS=Mus musculus OX=10090 GN=Mars1 PE=1 SV=1;tr|E9QB02|E9QB02_MOUSE Methionine--tRNA ligase, cytoplasmic OS=Mus musculus OX=10090 GN=Mars1 PE=1 SV=1	3	42	42	42	1	4	1	9	8	6	34	35	33	1	4	1	9	8	6	34	35	33	1	4	1	9	8	6	34	35	33	53.7	53.7	53.7	101.43	902	902;910;184	0	323.31	1.7	5.8	1.1
E9QJT2;Q3UMQ8	E9QJT2;Q3UMQ8	1;1	1;1	1;1	H/ACA ribonucleoprotein complex non-core subunit NAF1	Naf1	tr|E9QJT2|E9QJT2_MOUSE H/ACA ribonucleoprotein complex non-core subunit NAF1 OS=Mus musculus OX=10090 GN=Naf1 PE=1 SV=1;sp|Q3UMQ8|NAF1_MOUSE H/ACA ribonucleoprotein complex non-core subunit NAF1 OS=Mus musculus OX=10090 GN=Naf1 PE=1 SV=2	2	1	1	1	0	0	0	0	0	0	0	1	1	0	0	0	0	0	0	0	1	1	0	0	0	0	0	0	0	1	1	2.7	2.7	2.7	63.65	597	597;489	0	4.4714	0	0	0
E9QJT5;P56376;Q8BMV3	E9QJT5;P56376	5;5;1	5;5;1	5;5;1	Acylphosphatase;Acylphosphatase-1	Acyp1	tr|E9QJT5|E9QJT5_MOUSE Acylphosphatase OS=Mus musculus OX=10090 GN=Acyp1 PE=1 SV=1;sp|P56376|ACYP1_MOUSE Acylphosphatase-1 OS=Mus musculus OX=10090 GN=Acyp1 PE=1 SV=2	3	5	5	5	4	5	5	2	2	2	0	1	0	4	5	5	2	2	2	0	1	0	4	5	5	2	2	2	0	1	0	35	35	35	17.344	157	157;99;108	0	9.2994	26.8	35	35
E9QK83;Q5XG71	E9QK83;Q5XG71	1;1	1;1	1;1	Small subunit processome component 20 homolog	Utp20	tr|E9QK83|E9QK83_MOUSE UTP20 small subunit processome component OS=Mus musculus OX=10090 GN=Utp20 PE=1 SV=1;sp|Q5XG71|UTP20_MOUSE Small subunit processome component 20 homolog OS=Mus musculus OX=10090 GN=Utp20 PE=1 SV=2	2	1	1	1	0	0	0	1	1	1	0	0	1	0	0	0	1	1	1	0	0	1	0	0	0	1	1	1	0	0	1	0.8	0.8	0.8	317.87	2789	2789;2788	0.0037453	1.8408	0	0	0
E9QK89;Q5PSV9	E9QK89;Q5PSV9	5;5	5;5	5;5	Mediator of DNA damage checkpoint protein 1	Mdc1	tr|E9QK89|E9QK89_MOUSE Mediator of DNA damage checkpoint protein 1 OS=Mus musculus OX=10090 GN=Mdc1 PE=1 SV=1;sp|Q5PSV9|MDC1_MOUSE Mediator of DNA damage checkpoint protein 1 OS=Mus musculus OX=10090 GN=Mdc1 PE=1 SV=1	2	5	5	5	0	0	0	1	1	0	3	5	2	0	0	0	1	1	0	3	5	2	0	0	0	1	1	0	3	5	2	4.1	4.1	4.1	184.8	1708	1708;1707	0	28.938	0	0	0
Q8CIC2;E9QL43;A0A0R4J1K6	Q8CIC2;E9QL43;A0A0R4J1K6	8;8;5	8;8;5	8;8;5	Nucleoporin-like protein 2	Nupl2	sp|Q8CIC2|NUP42_MOUSE Nucleoporin NUP42 OS=Mus musculus OX=10090 GN=Nup42 PE=2 SV=1;tr|E9QL43|E9QL43_MOUSE Nucleoporin like 2 OS=Mus musculus OX=10090 GN=Nupl2 PE=1 SV=1;tr|A0A0R4J1K6|A0A0R4J1K6_MOUSE Nucleoporin like 2 OS=Mus musculus OX=10090 GN=Nupl2 PE	3	8	8	8	0	0	0	3	2	3	5	5	7	0	0	0	3	2	3	5	5	7	0	0	0	3	2	3	5	5	7	26.9	26.9	26.9	44.337	420	420;420;161	0	19.701	0	0	0
E9QM77;O70305;F6U2C2;F7B6X4;F6V8M6	E9QM77;O70305;F6U2C2	9;9;6;4;3	8;8;5;4;2	2;2;2;2;2	Ataxin-2	Atxn2	tr|E9QM77|E9QM77_MOUSE Ataxin 2 OS=Mus musculus OX=10090 GN=Atxn2 PE=1 SV=1;sp|O70305|ATX2_MOUSE Ataxin-2 OS=Mus musculus OX=10090 GN=Atxn2 PE=1 SV=1;tr|F6U2C2|F6U2C2_MOUSE Ataxin 2 (Fragment) OS=Mus musculus OX=10090 GN=Atxn2 PE=1 SV=1	5	9	8	2	1	0	1	2	4	4	7	7	7	1	0	1	2	4	4	7	6	6	1	0	1	1	2	1	1	2	2	11.4	10.8	2.1	136.46	1286	1286;1285;929;330;662	0	30.527	1.3	0	1.3
Q8CES0;E9QMB7;F6QNU4	Q8CES0;E9QMB7	3;3;1	3;3;1	3;3;1	N-alpha-acetyltransferase 30	Naa30	sp|Q8CES0|NAA30_MOUSE N-alpha-acetyltransferase 30 OS=Mus musculus OX=10090 GN=Naa30 PE=1 SV=2;tr|E9QMB7|E9QMB7_MOUSE N(alpha)-acetyltransferase 30, NatC catalytic subunit OS=Mus musculus OX=10090 GN=Naa30 PE=1 SV=1	3	3	3	3	0	0	0	1	2	0	3	3	3	0	0	0	1	2	0	3	3	3	0	0	0	1	2	0	3	3	3	10.2	10.2	10.2	39.432	364	364;366;34	0	11.466	0	0	0
H3BKD4;H3BKE6;E9QMI7;E9QMJ1;H3BL41;H3BJY2;E9QN63;Q9QWY8;H3BK40;D3YX85;E9PX52;Q7SIG6	H3BKD4;H3BKE6;E9QMI7;E9QMJ1;H3BL41;H3BJY2;E9QN63;Q9QWY8	3;3;3;3;3;3;3;3;1;1;1;1	3;3;3;3;3;3;3;3;1;1;1;1	3;3;3;3;3;3;3;3;1;1;1;1	Arf-GAP with SH3 domain, ANK repeat and PH domain-containing protein 1	Asap1	tr|H3BKD4|H3BKD4_MOUSE ArfGAP with SH3 domain, ankyrin repeat and PH domain1 OS=Mus musculus OX=10090 GN=Asap1 PE=1 SV=1;tr|H3BKE6|H3BKE6_MOUSE ArfGAP with SH3 domain, ankyrin repeat and PH domain1 OS=Mus musculus OX=10090 GN=Asap1 PE=1 SV=1;tr|E9QMI7|E9QM	12	3	3	3	0	0	0	0	0	0	2	1	2	0	0	0	0	0	0	2	1	2	0	0	0	0	0	0	2	1	2	3.4	3.4	3.4	120.1	1075	1075;1087;1090;1112;1124;1144;1147;1147;211;955;1000;958	0	2.7232	0	0	0
Q05512;F6ZS70;E9QMP6;Q3T9A3;E9Q9N6;A0A0R4J0B1;A0A0R4J227;E9PYX3;F6ZEX4;F7A3Q3;E9Q2J6;F7CVZ7;F6UY70;F7CRG8;A0A0A6YY78;E9Q8H5;E9Q2G8;Q8CIP4;F6Z4Q6	Q05512;F6ZS70;E9QMP6;Q3T9A3;E9Q9N6;A0A0R4J0B1;A0A0R4J227;E9PYX3	14;14;14;14;13;13;13;13;5;5;5;4;3;3;2;2;1;1;1	14;14;14;14;13;13;13;13;5;5;5;4;3;3;2;2;1;1;1	10;10;10;10;9;9;9;9;5;5;3;3;3;3;0;2;1;0;1	Serine/threonine-protein kinase MARK2	Mark2	sp|Q05512|MARK2_MOUSE Serine/threonine-protein kinase MARK2 OS=Mus musculus OX=10090 GN=Mark2 PE=1 SV=3;tr|F6ZS70|F6ZS70_MOUSE non-specific serine/threonine protein kinase (Fragment) OS=Mus musculus OX=10090 GN=Mark2 PE=1 SV=1;tr|E9QMP6|E9QMP6_MOUSE non-sp	19	14	14	10	2	1	0	5	6	9	6	7	5	2	1	0	5	6	9	6	7	5	2	1	0	4	5	8	3	4	3	23.5	23.5	18.6	86.305	776	776;776;776;743;707;731;722;716;303;204;193;307;266;174;153;110;89;752;54	0	35.998	4	2.2	0
E9QN08;Q80T06;P57776;D3YUQ9;D3YZT9	E9QN08;Q80T06;P57776;D3YUQ9;D3YZT9	21;21;21;16;15	3;3;3;3;3	0;0;0;0;0	Elongation factor 1-delta	Eef1d	tr|E9QN08|E9QN08_MOUSE Eukaryotic translation elongation factor 1 delta (guanine nucleotide exchange protein) (Fragment) OS=Mus musculus OX=10090 GN=Eef1d PE=1 SV=1;tr|Q80T06|Q80T06_MOUSE Eukaryotic translation elongation factor 1 delta (guanine nucleotide	5	21	3	0	8	8	7	10	11	7	18	16	19	1	0	0	1	1	0	2	2	3	0	0	0	0	0	0	0	0	0	73.1	6.5	0	27.217	245	245;281;281;193;210	0	9.7335	41.2	45.7	35.9
E9QNN1;Q3UR42	E9QNN1;Q3UR42	94;56	94;56	1;1		Dhx9	tr|E9QNN1|E9QNN1_MOUSE RNA helicase OS=Mus musculus OX=10090 GN=Dhx9 PE=1 SV=1;tr|Q3UR42|Q3UR42_MOUSE RNA helicase (Fragment) OS=Mus musculus OX=10090 GN=Dhx9 PE=1 SV=1	2	94	94	1	10	7	7	78	77	76	82	82	85	10	7	7	78	77	76	82	82	85	0	0	0	1	1	0	1	1	1	63	63	1.7	149.69	1384	1384;735	0	323.31	8.6	6.4	5.5
E9QNR9;Q920N1	E9QNR9;Q920N1	6;6	6;6	6;6	Outer dense fiber protein 3	Odf3	tr|E9QNR9|E9QNR9_MOUSE Outer dense fiber of sperm tails 3 OS=Mus musculus OX=10090 GN=Cimap1a PE=1 SV=1;sp|Q920N1|CMA1A_MOUSE Ciliary microtubule associated protein 1A OS=Mus musculus OX=10090 GN=Cimap1a PE=1 SV=2	2	6	6	6	4	5	5	3	3	2	3	3	3	4	5	5	3	3	2	3	3	3	4	5	5	3	3	2	3	3	3	27.5	27.5	27.5	30.574	280	280;254	0	11.234	19.3	24.3	22.5
E9QP46;Q6ZWQ0;D3Z2J8;Q6ZWN0	E9QP46;Q6ZWQ0	3;3;1;1	3;3;1;1	3;3;1;1	Nesprin-2	Syne2	tr|E9QP46|E9QP46_MOUSE Spectrin repeat containing, nuclear envelope 2 OS=Mus musculus OX=10090 GN=Syne2 PE=1 SV=1;sp|Q6ZWQ0|SYNE2_MOUSE Nesprin-2 OS=Mus musculus OX=10090 GN=Syne2 PE=1 SV=2	4	3	3	3	0	0	0	1	0	0	0	2	1	0	0	0	1	0	0	0	2	1	0	0	0	1	0	0	0	2	1	0.6	0.6	0.6	782.13	6870	6870;6874;112;528	0.0033755	1.9541	0	0	0
G5E8R3;E9QPD7;Q05920;A0A286YCC5;A0A494B912;A0A494B951	G5E8R3;E9QPD7;Q05920	113;113;112;11;11;10	113;113;112;11;11;10	113;113;112;11;11;10	Pyruvate carboxylase;Pyruvate carboxylase, mitochondrial	Pcx;Pc	tr|G5E8R3|G5E8R3_MOUSE Pyruvate carboxylase OS=Mus musculus OX=10090 GN=Pcx PE=1 SV=1;tr|E9QPD7|E9QPD7_MOUSE Pyruvate carboxylase OS=Mus musculus OX=10090 GN=Pcx PE=1 SV=1;sp|Q05920|PYC_MOUSE Pyruvate carboxylase, mitochondrial OS=Mus musculus OX=10090 GN=	6	113	113	113	94	101	97	106	103	99	97	98	95	94	101	97	106	103	99	97	98	95	94	101	97	106	103	99	97	98	95	80.6	80.6	80.6	129.7	1178	1178;1179;1178;116;120;97	0	323.31	69.8	72.8	73.8
E9QPI5;Q6A026	E9QPI5;Q6A026	5;5	4;4	4;4	Sister chromatid cohesion protein PDS5 homolog A	Pds5a	tr|E9QPI5|E9QPI5_MOUSE PDS5 cohesin associated factor A OS=Mus musculus OX=10090 GN=Pds5a PE=1 SV=1;sp|Q6A026|PDS5A_MOUSE Sister chromatid cohesion protein PDS5 homolog A OS=Mus musculus OX=10090 GN=Pds5a PE=1 SV=3	2	5	4	4	0	0	0	0	0	1	5	2	2	0	0	0	0	0	1	4	2	1	0	0	0	0	0	1	4	2	1	5.2	4.3	4.3	150.22	1332	1332;1332	0	6.4302	0	0	0
E9QPK4;A0A1L1SSL9;Q9JKK8	E9QPK4;A0A1L1SSL9;Q9JKK8	31;30;29	31;30;29	31;30;29	Serine/threonine-protein kinase ATR	Atr	tr|E9QPK4|E9QPK4_MOUSE Serine/threonine-protein kinase ATR OS=Mus musculus OX=10090 GN=Atr PE=1 SV=2;tr|A0A1L1SSL9|A0A1L1SSL9_MOUSE Serine/threonine-protein kinase ATR OS=Mus musculus OX=10090 GN=Atr PE=1 SV=1;sp|Q9JKK8|ATR_MOUSE Serine/threonine-protein k	3	31	31	31	1	2	1	12	12	16	15	16	18	1	2	1	12	12	16	15	16	18	1	2	1	12	12	16	15	16	18	14.5	14.5	14.5	300.36	2635	2635;2641;2635	0	67.925	0.5	0.9	0.5
P39061;E9QPX1;A0A1W2P6N8	P39061;E9QPX1	8;8;1	8;8;1	8;8;1	Collagen alpha-1(XVIII) chain;Endostatin	Col18a1	sp|P39061|COIA1_MOUSE Collagen alpha-1(XVIII) chain OS=Mus musculus OX=10090 GN=Col18a1 PE=1 SV=4;tr|E9QPX1|E9QPX1_MOUSE Collagen, type XVIII, alpha 1 OS=Mus musculus OX=10090 GN=Col18a1 PE=1 SV=1	3	8	8	8	0	0	0	3	1	3	4	3	2	0	0	0	3	1	3	4	3	2	0	0	0	3	1	3	4	3	2	5	5	5	182.17	1774	1774;1774;225	0	19.604	0	0	0
F2Z456;Q9DCN2	F2Z456;Q9DCN2	2;2	2;2	2;2	NADH-cytochrome b5 reductase;NADH-cytochrome b5 reductase 3;NADH-cytochrome b5 reductase 3 membrane-bound form;NADH-cytochrome b5 reductase 3 soluble form	Cyb5r3	tr|F2Z456|F2Z456_MOUSE NADH-cytochrome b5 reductase OS=Mus musculus OX=10090 GN=Cyb5r3 PE=1 SV=1;sp|Q9DCN2|NB5R3_MOUSE NADH-cytochrome b5 reductase 3 OS=Mus musculus OX=10090 GN=Cyb5r3 PE=1 SV=3	2	2	2	2	1	1	1	0	0	1	0	0	0	1	1	1	0	0	1	0	0	0	1	1	1	0	0	1	0	0	0	9.3	9.3	9.3	34.929	313	313;301	0	3.1322	5.4	5.4	5.4
F2Z461	F2Z461	2	2	2	E3 ISG15--protein ligase Herc6	Herc6	sp|F2Z461|HERC6_MOUSE E3 ISG15--protein ligase Herc6 OS=Mus musculus OX=10090 GN=Herc6 PE=2 SV=1	1	2	2	2	0	0	0	1	0	0	0	1	1	0	0	0	1	0	0	0	1	1	0	0	0	1	0	0	0	1	1	2.5	2.5	2.5	112.93	1003	1003	0.0049322	1.7729	0	0	0
F2Z490;Q9R1C6	F2Z490;Q9R1C6	1;1	1;1	1;1	Diacylglycerol kinase epsilon	Dgke	tr|F2Z490|F2Z490_MOUSE diacylglycerol kinase (ATP) OS=Mus musculus OX=10090 GN=Dgke PE=1 SV=1;sp|Q9R1C6|DGKE_MOUSE Diacylglycerol kinase epsilon OS=Mus musculus OX=10090 GN=Dgke PE=1 SV=1	2	1	1	1	0	0	0	1	0	0	0	0	0	0	0	0	1	0	0	0	0	0	0	0	0	1	0	0	0	0	0	3.2	3.2	3.2	46.079	406	406;564	0.0087232	1.5275	0	0	0
F2Z4A6;Q5SSG4	F2Z4A6;Q5SSG4	1;1	1;1	1;1	GAS2-like protein 2	Gas2l2	tr|F2Z4A6|F2Z4A6_MOUSE Growth arrest-specific 2 like 2 OS=Mus musculus OX=10090 GN=Gas2l2 PE=1 SV=1;sp|Q5SSG4|GA2L2_MOUSE GAS2-like protein 2 OS=Mus musculus OX=10090 GN=Gas2l2 PE=1 SV=1	2	1	1	1	0	0	0	1	1	1	0	1	0	0	0	0	1	1	1	0	1	0	0	0	0	1	1	1	0	1	0	5.2	5.2	5.2	23.904	213	213;860	0.00089047	2.3813	0	0	0
Q6DIC0;H3BLH0;F2Z4A9;H3BJK2;E9QAB8;H3BKJ3;A0A140LHF4;A0A140LHP6;H3BK47;A0A140LID0;A0A140LIM0;H3BJM2;A0A140LJK1;Q9D007;A0A140LIQ9;A0A140LHE2;H3BLI4;H3BJI1;A0A140LHZ8;H3BKD2;A0A140LIV3;A0A140LI14	Q6DIC0;H3BLH0;F2Z4A9;H3BJK2;E9QAB8	8;8;8;7;6;2;2;2;2;2;2;2;2;2;2;2;2;2;2;2;2;2	3;3;3;3;2;1;1;1;1;1;1;1;1;1;1;1;1;1;1;2;1;1	3;3;3;3;2;1;1;1;1;1;1;1;1;1;1;1;1;1;1;2;1;1	Probable global transcription activator SNF2L2	Smarca2	sp|Q6DIC0|SMCA2_MOUSE Probable global transcription activator SNF2L2 OS=Mus musculus OX=10090 GN=Smarca2 PE=1 SV=1;tr|H3BLH0|H3BLH0_MOUSE SWI/SNF related, matrix associated, actin dependent regulator of chromatin, subfamily a, member 2 OS=Mus musculus OX=1	22	8	3	3	0	0	0	0	1	1	7	5	6	0	0	0	0	0	0	3	2	2	0	0	0	0	0	0	3	2	2	5.8	2.5	2.5	180.25	1577	1577;1601;1583;1525;1510;254;296;278;276;267;260;149;169;236;229;228;211;201;200;173;170;244	0	12.543	0	0	0
F6Q1Q5	F6Q1Q5	1	1	1		Cep128	tr|F6Q1Q5|F6Q1Q5_MOUSE Centrosomal protein 128 (Fragment) OS=Mus musculus OX=10090 GN=Cep128 PE=1 SV=1	1	1	1	1	0	0	0	0	0	1	0	0	0	0	0	0	0	0	1	0	0	0	0	0	0	0	0	1	0	0	0	6.7	6.7	6.7	14.411	120	120	1	-2	0	0	0
F6Q325;Q9CZA6;Q9ERR1	F6Q325;Q9CZA6;Q9ERR1	1;1;1	1;1;1	1;1;1	Nuclear distribution protein nudE homolog 1;Nuclear distribution protein nudE-like 1	Nde1;Ndel1	tr|F6Q325|F6Q325_MOUSE NudE neurodevelopment protein 1 (Fragment) OS=Mus musculus OX=10090 GN=Nde1 PE=1 SV=1;sp|Q9CZA6|NDE1_MOUSE Nuclear distribution protein nudE homolog 1 OS=Mus musculus OX=10090 GN=Nde1 PE=1 SV=1;sp|Q9ERR1|NDEL1_MOUSE Nuclear distribut	3	1	1	1	0	0	0	1	1	0	1	0	1	0	0	0	1	1	0	1	0	1	0	0	0	1	1	0	1	0	1	6.9	6.9	6.9	18.497	175	175;344;345	0.0021654	2.1832	0	0	0
F6QCI0;Q8BQ46	F6QCI0;Q8BQ46	4;4	2;2	2;2		Taf15	tr|F6QCI0|F6QCI0_MOUSE TATA-box binding protein associated factor 15 (Fragment) OS=Mus musculus OX=10090 GN=Taf15 PE=1 SV=1;tr|Q8BQ46|Q8BQ46_MOUSE TAF15 RNA polymerase II, TATA box binding protein (TBP)-associated factor OS=Mus musculus OX=10090 GN=Taf15 P	2	4	2	2	0	0	0	3	3	3	4	3	3	0	0	0	1	1	1	2	1	1	0	0	0	1	1	1	2	1	1	14.2	9.9	9.9	33.603	324	324;557	0	10.929	0	0	0
F6QKD2;Q9CWX9;A0A0N4SVT1;A0A0N4SWC5;A0A0N4SV55;A0A0N4SVK2	F6QKD2;Q9CWX9;A0A0N4SVT1;A0A0N4SWC5	5;5;4;3;1;1	5;5;4;3;1;1	5;5;4;3;1;1	Probable ATP-dependent RNA helicase DDX47	Ddx47	tr|F6QKD2|F6QKD2_MOUSE RNA helicase (Fragment) OS=Mus musculus OX=10090 GN=Ddx47 PE=1 SV=1;sp|Q9CWX9|DDX47_MOUSE Probable ATP-dependent RNA helicase DDX47 OS=Mus musculus OX=10090 GN=Ddx47 PE=2 SV=2;tr|A0A0N4SVT1|A0A0N4SVT1_MOUSE ATP-dependent RNA helicase	6	5	5	5	0	0	0	2	2	3	4	4	4	0	0	0	2	2	3	4	4	4	0	0	0	2	2	3	4	4	4	15.8	15.8	15.8	39.913	360	360;455;380;180;62;196	0	12.525	0	0	0
F6R782;Q6PCQ0	F6R782;Q6PCQ0	1;1	1;1	1;1	IQ domain-containing protein E	Iqce	tr|F6R782|F6R782_MOUSE IQ motif containing E (Fragment) OS=Mus musculus OX=10090 GN=Iqce PE=1 SV=1;sp|Q6PCQ0|IQCE_MOUSE IQ domain-containing protein E OS=Mus musculus OX=10090 GN=Iqce PE=1 SV=1	2	1	1	1	0	0	0	1	1	1	1	1	1	0	0	0	1	1	1	1	1	1	0	0	0	1	1	1	1	1	1	4.8	4.8	4.8	42.867	396	396;778	0	27.09	0	0	0
Q9CPN7;F6R7E8	Q9CPN7;F6R7E8	1;1	1;1	1;1		1810009J06Rik;Gm2663	tr|Q9CPN7|Q9CPN7_MOUSE RIKEN cDNA 1810009J06 gene OS=Mus musculus OX=10090 GN=1810009J06Rik PE=2 SV=1;tr|F6R7E8|F6R7E8_MOUSE Predicted gene 2663 OS=Mus musculus OX=10090 GN=Gm2663 PE=4 SV=1	2	1	1	1	1	1	1	1	1	1	1	1	0	1	1	1	1	1	1	1	1	0	1	1	1	1	1	1	1	1	0	8.1	8.1	8.1	26.503	247	247;247	0	6.1378	8.1	8.1	8.1
F6RBL8;Q62559	F6RBL8;Q62559	1;1	1;1	1;1	Intraflagellar transport protein 52 homolog	Ift52	tr|F6RBL8|F6RBL8_MOUSE Intraflagellar transport 52 (Fragment) OS=Mus musculus OX=10090 GN=Ift52 PE=1 SV=1;sp|Q62559|IFT52_MOUSE Intraflagellar transport protein 52 homolog OS=Mus musculus OX=10090 GN=Ift52 PE=1 SV=2	2	1	1	1	0	0	0	0	0	0	1	1	1	0	0	0	0	0	0	1	1	1	0	0	0	0	0	0	1	1	1	4.7	4.7	4.7	26.203	234	234;426	0	4.8503	0	0	0
F6RJ39;Q9JIX8;B8JJ91;Q52KR6;B8JJ92;B8JJ90;F6Q8C0;B8JJ89	F6RJ39;Q9JIX8;B8JJ91;Q52KR6;B8JJ92	18;18;14;13;13;3;2;2	18;18;14;13;13;3;2;2	18;18;14;13;13;3;2;2	Apoptotic chromatin condensation inducer in the nucleus	Acin1	tr|F6RJ39|F6RJ39_MOUSE Apoptotic chromatin condensation inducer 1 (Fragment) OS=Mus musculus OX=10090 GN=Acin1 PE=1 SV=1;sp|Q9JIX8|ACINU_MOUSE Apoptotic chromatin condensation inducer in the nucleus OS=Mus musculus OX=10090 GN=Acin1 PE=1 SV=3;tr|B8JJ91|B8J	8	18	18	18	0	0	0	2	5	1	16	14	16	0	0	0	2	5	1	16	14	16	0	0	0	2	5	1	16	14	16	15.9	15.9	15.9	143.54	1272	1272;1338;634;552;580;221;141;256	0	46.531	0	0	0
F6RJV6;Q9JJK2	F6RJV6;Q9JJK2	11;11	11;11	11;11	LanC-like protein 2	Lancl2	tr|F6RJV6|F6RJV6_MOUSE LanC (bacterial lantibiotic synthetase component C)-like 2 (Fragment) OS=Mus musculus OX=10090 GN=Lancl2 PE=1 SV=1;sp|Q9JJK2|LANC2_MOUSE LanC-like protein 2 OS=Mus musculus OX=10090 GN=Lancl2 PE=1 SV=1	2	11	11	11	1	2	3	4	4	6	9	8	6	1	2	3	4	4	6	9	8	6	1	2	3	4	4	6	9	8	6	30.6	30.6	30.6	49.742	441	441;450	0	43.65	2.7	5.9	8.4
F6RR02;Q5M6W7;Q91YJ5;Q5M6W8	F6RR02;Q5M6W7;Q91YJ5;Q5M6W8	2;2;2;1	2;2;2;1	2;2;2;1	Translation initiation factor IF-2, mitochondrial	Mtif2	tr|F6RR02|F6RR02_MOUSE Mitochondrial translational initiation factor 2 (Fragment) OS=Mus musculus OX=10090 GN=Mtif2 PE=1 SV=1;tr|Q5M6W7|Q5M6W7_MOUSE Mitochondrial translational initiation factor 2 (Fragment) OS=Mus musculus OX=10090 GN=Mtif2 PE=1 SV=1;sp|Q	4	2	2	2	0	0	0	0	0	0	2	2	2	0	0	0	0	0	0	2	2	2	0	0	0	0	0	0	2	2	2	8.9	8.9	8.9	26.78	247	247;401;727;196	0	4.2136	0	0	0
F6S5X0;Q9D1F5	F6S5X0;Q9D1F5	1;1	1;1	1;1	UPF0544 protein C5orf45 homolog	3010026O09Rik	tr|F6S5X0|F6S5X0_MOUSE MRN complex interacting protein (Fragment) OS=Mus musculus OX=10090 GN=Mrnip PE=1 SV=1;sp|Q9D1F5|MRNIP_MOUSE MRN complex-interacting protein OS=Mus musculus OX=10090 GN=Mrnip PE=2 SV=1	2	1	1	1	0	0	0	0	0	0	0	1	0	0	0	0	0	0	0	0	1	0	0	0	0	0	0	0	0	1	0	13.6	13.6	13.6	11.623	103	103;335	0.00090909	2.5193	0	0	0
Q99LD7;F6S742;Q8C5V4;Q9QXP6;F6WPC3;E9QAG7	Q99LD7;F6S742;Q8C5V4;Q9QXP6;F6WPC3;E9QAG7	3;3;3;3;2;2	3;3;3;3;2;2	3;3;3;3;2;2	E3 ubiquitin-protein ligase makorin-1	Mkrn1	tr|Q99LD7|Q99LD7_MOUSE RING-type E3 ubiquitin transferase OS=Mus musculus OX=10090 GN=Mkrn1 PE=1 SV=1;tr|F6S742|F6S742_MOUSE RING-type E3 ubiquitin transferase (Fragment) OS=Mus musculus OX=10090 GN=Mkrn1 PE=1 SV=1;tr|Q8C5V4|Q8C5V4_MOUSE RING-type E3 ubiqu	6	3	3	3	0	0	0	0	0	0	3	3	2	0	0	0	0	0	0	3	3	2	0	0	0	0	0	0	3	3	2	13.7	13.7	13.7	34.967	329	329;344;481;481;180;417	0	30.759	0	0	0
F6SMJ7;Q9CY28	F6SMJ7;Q9CY28	1;1	1;1	1;1	GTP-binding protein 8	Gtpbp8	tr|F6SMJ7|F6SMJ7_MOUSE GTP-binding protein 8 (putative) (Fragment) OS=Mus musculus OX=10090 GN=Gtpbp8 PE=1 SV=1;sp|Q9CY28|GTPB8_MOUSE GTP-binding protein 8 OS=Mus musculus OX=10090 GN=Gtpbp8 PE=2 SV=1	2	1	1	1	0	0	0	0	0	0	1	0	0	0	0	0	0	0	0	1	0	0	0	0	0	0	0	0	1	0	0	8.2	8.2	8.2	16.198	147	147;285	0.0086957	1.5118	0	0	0
F6SMY7;Q7TPH6;F6T4V9;F7CZG3	F6SMY7;Q7TPH6;F6T4V9	3;3;2;1	3;3;2;1	3;3;2;1	E3 ubiquitin-protein ligase MYCBP2	Mycbp2	tr|F6SMY7|F6SMY7_MOUSE RCR-type E3 ubiquitin transferase (Fragment) OS=Mus musculus OX=10090 GN=Mycbp2 PE=1 SV=1;sp|Q7TPH6|MYCB2_MOUSE E3 ubiquitin-protein ligase MYCBP2 OS=Mus musculus OX=10090 GN=Mycbp2 PE=1 SV=3;tr|F6T4V9|F6T4V9_MOUSE MYC binding protei	4	3	3	3	0	0	0	0	1	1	2	2	2	0	0	0	0	1	1	2	2	2	0	0	0	0	1	1	2	2	2	0.7	0.7	0.7	509.35	4636	4636;4749;1463;871	0	3.9975	0	0	0
F6SRV1	F6SRV1	2	1	1		Sf1	tr|F6SRV1|F6SRV1_MOUSE Splicing factor 1 (Fragment) OS=Mus musculus OX=10090 GN=Sf1 PE=1 SV=8	1	2	1	1	0	0	0	1	2	0	2	2	1	0	0	0	1	1	0	1	1	0	0	0	0	1	1	0	1	1	0	15.2	7.6	7.6	17.88	171	171	0	3.2339	0	0	0
F6TCF9;Q60739	F6TCF9;Q60739	6;6	6;6	6;6	BAG family molecular chaperone regulator 1	Bag1	tr|F6TCF9|F6TCF9_MOUSE BAG family molecular chaperone regulator 1 OS=Mus musculus OX=10090 GN=Bag1 PE=1 SV=1;sp|Q60739|BAG1_MOUSE BAG family molecular chaperone regulator 1 OS=Mus musculus OX=10090 GN=Bag1 PE=1 SV=3	2	6	6	6	0	0	0	0	0	0	3	6	4	0	0	0	0	0	0	3	6	4	0	0	0	0	0	0	3	6	4	17.2	17.2	17.2	39.696	355	355;355	0	22.456	0	0	0
Q60710;F6TVP2;E9PYG9	Q60710;F6TVP2;E9PYG9	3;3;2	3;3;2	3;3;2	Deoxynucleoside triphosphate triphosphohydrolase SAMHD1	Samhd1	sp|Q60710|SAMH1_MOUSE Deoxynucleoside triphosphate triphosphohydrolase SAMHD1 OS=Mus musculus OX=10090 GN=Samhd1 PE=1 SV=3;tr|F6TVP2|F6TVP2_MOUSE Deoxynucleoside triphosphate triphosphohydrolase SAMHD1 (Fragment) OS=Mus musculus OX=10090 GN=Samhd1 PE=1 SV=	3	3	3	3	0	0	0	0	0	0	2	1	2	0	0	0	0	0	0	2	1	2	0	0	0	0	0	0	2	1	2	5.5	5.5	5.5	75.892	658	658;631;582	0	4.3615	0	0	0
F6TY75	F6TY75	3	2	2		Mex3d	tr|F6TY75|F6TY75_MOUSE Mex3 RNA binding family member D (Fragment) OS=Mus musculus OX=10090 GN=Mex3d PE=1 SV=1	1	3	2	2	0	2	2	2	2	2	2	2	3	0	2	2	1	1	1	1	1	2	0	2	2	1	1	1	1	1	2	16.4	9.3	9.3	26.648	268	268	0	32.624	0	9.3	9.3
F6U5V1;Q3TQS1;A0A0A6YWC2	F6U5V1;Q3TQS1;A0A0A6YWC2	5;3;3	5;3;3	5;3;3		Larp1b	tr|F6U5V1|F6U5V1_MOUSE La ribonucleoprotein 1B OS=Mus musculus OX=10090 GN=Larp1b PE=1 SV=2;tr|Q3TQS1|Q3TQS1_MOUSE La ribonucleoprotein 1B OS=Mus musculus OX=10090 GN=Larp1b PE=1 SV=1;tr|A0A0A6YWC2|A0A0A6YWC2_MOUSE La ribonucleoprotein 1B OS=Mus musculus O	3	5	5	5	0	0	0	3	2	2	4	3	4	0	0	0	3	2	2	4	3	4	0	0	0	3	2	2	4	3	4	21.6	21.6	21.6	59.728	541	541;288;335	0	22.924	0	0	0
F6UTK3;Q6P8X3;A0A2I3BR17;Q9D9T6	F6UTK3;Q6P8X3;A0A2I3BR17;Q9D9T6	3;2;2;2	3;2;2;2	3;2;2;2	Spermatogenesis-associated protein 3	Spata3	tr|F6UTK3|F6UTK3_MOUSE Spermatogenesis associated 3 (Fragment) OS=Mus musculus OX=10090 GN=Spata3 PE=1 SV=1;tr|Q6P8X3|Q6P8X3_MOUSE Spermatogenesis associated 3 OS=Mus musculus OX=10090 GN=Spata3 PE=2 SV=1;tr|A0A2I3BR17|A0A2I3BR17_MOUSE Spermatogenesis asso	4	3	3	3	0	0	0	1	1	1	2	2	2	0	0	0	1	1	1	2	2	2	0	0	0	1	1	1	2	2	2	16.1	16.1	16.1	18.561	174	174;171;333;193	0	3.5366	0	0	0
F6W2Q5;Q5JC28;H3BK65;P42567;H3BJB8	F6W2Q5;Q5JC28;H3BK65;P42567;H3BJB8	5;5;5;5;3	5;5;5;5;3	5;5;5;5;3	Epidermal growth factor receptor substrate 15	Eps15	tr|F6W2Q5|F6W2Q5_MOUSE Epidermal growth factor receptor pathway substrate 15 OS=Mus musculus OX=10090 GN=Eps15 PE=1 SV=1;tr|Q5JC28|Q5JC28_MOUSE Epidermal growth factor receptor pathway substrate 15 OS=Mus musculus OX=10090 GN=Eps15 PE=1 SV=1;tr|H3BK65|H3BK	5	5	5	5	0	1	2	0	1	0	2	4	2	0	1	2	0	1	0	2	4	2	0	1	2	0	1	0	2	4	2	9	9	9	83.593	764	764;793;933;897;103	0	62.32	0	2.6	4.2
Q5NCC4;F6X2H0;Q5NCC2;Q5NCC3	Q5NCC4;F6X2H0;Q5NCC2;Q5NCC3	1;1;1;1	1;1;1;1	1;1;1;1	E3 ubiquitin-protein ligase TRIM41	Trim41	tr|Q5NCC4|Q5NCC4_MOUSE Tripartite motif-containing 41 (Fragment) OS=Mus musculus OX=10090 GN=Trim41 PE=1 SV=1;tr|F6X2H0|F6X2H0_MOUSE RING-type E3 ubiquitin transferase (Fragment) OS=Mus musculus OX=10090 GN=Trim41 PE=1 SV=1;tr|Q5NCC2|Q5NCC2_MOUSE RING-type	4	1	1	1	0	0	0	0	0	0	0	0	1	0	0	0	0	0	0	0	0	1	0	0	0	0	0	0	0	0	1	9.5	9.5	9.5	14.259	126	126;157;161;630	0	3.1482	0	0	0
F6XRI9;Q811U4	F6XRI9;Q811U4	1;1	1;1	1;1	Mitofusin-1	Mfn1	tr|F6XRI9|F6XRI9_MOUSE Mitofusin 1 (Fragment) OS=Mus musculus OX=10090 GN=Mfn1 PE=1 SV=1;sp|Q811U4|MFN1_MOUSE Mitofusin-1 OS=Mus musculus OX=10090 GN=Mfn1 PE=1 SV=3	2	1	1	1	1	1	1	1	1	1	1	1	1	1	1	1	1	1	1	1	1	1	1	1	1	1	1	1	1	1	1	4.4	4.4	4.4	35.923	319	319;741	0	8.5442	4.4	4.4	4.4
F6XWD4;Q3UMT1	F6XWD4;Q3UMT1	4;4	4;4	4;4	Protein phosphatase 1 regulatory subunit 12C	Ppp1r12c	tr|F6XWD4|F6XWD4_MOUSE Protein phosphatase 1, regulatory subunit 12C (Fragment) OS=Mus musculus OX=10090 GN=Ppp1r12c PE=1 SV=1;sp|Q3UMT1|PP12C_MOUSE Protein phosphatase 1 regulatory subunit 12C OS=Mus musculus OX=10090 GN=Ppp1r12c PE=1 SV=1	2	4	4	4	1	0	0	0	1	0	2	3	2	1	0	0	0	1	0	2	3	2	1	0	0	0	1	0	2	3	2	6.4	6.4	6.4	76.641	704	704;782	0	18.671	1.7	0	0
F6YVP7;P62270;A0A1Y7VKY1;S4R1N6;A0A3Q4EGP3	F6YVP7;P62270;A0A1Y7VKY1;S4R1N6	14;14;13;12;4	14;14;13;12;4	14;14;13;12;4	40S ribosomal protein S18	Gm10260;Rps18	tr|F6YVP7|F6YVP7_MOUSE Small ribosomal subunit protein uS13 OS=Mus musculus OX=10090 GN=Rps18-ps6 PE=3 SV=2;sp|P62270|RS18_MOUSE Small ribosomal subunit protein uS13 OS=Mus musculus OX=10090 GN=Rps18 PE=1 SV=3;tr|A0A1Y7VKY1|A0A1Y7VKY1_MOUSE Small ribosomal	5	14	14	14	8	7	6	6	5	4	11	9	9	8	7	6	6	5	4	11	9	9	8	7	6	6	5	4	11	9	9	59.9	59.9	59.9	17.671	152	152;152;152;107;38	0	38.759	41.4	34.2	38.2
F6ZDS4;Q7M739;F6RX08	F6ZDS4;Q7M739;F6RX08	2;2;1	2;2;1	2;2;1	Nucleoprotein TPR	Tpr	sp|F6ZDS4|TPR_MOUSE Nucleoprotein TPR OS=Mus musculus OX=10090 GN=Tpr PE=1 SV=1;tr|Q7M739|Q7M739_MOUSE Nucleoprotein TPR OS=Mus musculus OX=10090 GN=Tpr PE=1 SV=1;tr|F6RX08|F6RX08_MOUSE Translocated promoter region, nuclear basket protein (Fragment) OS=Mus	3	2	2	2	0	0	0	0	0	0	0	0	2	0	0	0	0	0	0	0	0	2	0	0	0	0	0	0	0	0	2	1.2	1.2	1.2	273.99	2431	2431;2357;611	0	4.4796	0	0	0
F6ZFU0	F6ZFU0	23	1	0		Eef1d	tr|F6ZFU0|F6ZFU0_MOUSE Eukaryotic translation elongation factor 1 delta (guanine nucleotide exchange protein) (Fragment) OS=Mus musculus OX=10090 GN=Eef1d PE=1 SV=1	1	23	1	0	9	8	9	11	11	9	21	19	20	0	0	0	0	0	0	1	1	1	0	0	0	0	0	0	0	0	0	45.7	3.8	0	61.391	552	552	0	5.4213	20.3	19	19.6
F6ZLH4;K4DI66	F6ZLH4;K4DI66	13;13	2;2	2;2		Knop1	tr|F6ZLH4|F6ZLH4_MOUSE Lysine rich nucleolar protein 1 OS=Mus musculus OX=10090 GN=Knop1 PE=1 SV=2;tr|K4DI66|K4DI66_MOUSE Lysine rich nucleolar protein 1 OS=Mus musculus OX=10090 GN=Knop1 PE=1 SV=1	2	13	2	2	0	0	0	0	0	0	10	10	10	0	0	0	0	0	0	1	1	2	0	0	0	0	0	0	1	1	2	41.5	5.2	5.2	38.889	347	347;370	0	3.5908	0	0	0
F6ZSG0	F6ZSG0	7	1	1		Mtdh	tr|F6ZSG0|F6ZSG0_MOUSE Metadherin (Fragment) OS=Mus musculus OX=10090 GN=Mtdh PE=1 SV=1	1	7	1	1	0	0	0	2	1	3	7	5	5	0	0	0	0	0	0	1	1	1	0	0	0	0	0	0	1	1	1	24.2	3.9	3.9	38.407	356	356	0.00090498	2.4907	0	0	0
F7ACR9;F6Q750;Q69ZZ9;F6RL59;S4R2C6;S4R2A8	F7ACR9;F6Q750	53;43;22;5;2;2	53;43;22;5;2;2	2;1;2;1;1;1		Macf1	tr|F7ACR9|F7ACR9_MOUSE Microtubule-actin crosslinking factor 1 (Fragment) OS=Mus musculus OX=10090 GN=Macf1 PE=1 SV=1;tr|F6Q750|F6Q750_MOUSE Microtubule-actin crosslinking factor 1 (Fragment) OS=Mus musculus OX=10090 GN=Macf1 PE=1 SV=1	6	53	53	2	0	0	0	2	2	0	33	34	38	0	0	0	2	2	0	33	34	38	0	0	0	0	1	0	2	2	0	13	13	0.4	608.23	5333	5333;4429;3305;349;259;262	0	154.75	0	0	0
F7ADT6;F7ADQ2;Q6PAR5	F7ADT6;F7ADQ2;Q6PAR5	1;1;1	1;1;1	1;1;1	GTPase-activating protein and VPS9 domain-containing protein 1	Gapvd1	tr|F7ADT6|F7ADT6_MOUSE GTPase activating protein and VPS9 domains 1 (Fragment) OS=Mus musculus OX=10090 GN=Gapvd1 PE=1 SV=1;tr|F7ADQ2|F7ADQ2_MOUSE GTPase activating protein and VPS9 domains 1 (Fragment) OS=Mus musculus OX=10090 GN=Gapvd1 PE=1 SV=1;sp|Q6PAR	3	1	1	1	0	0	0	1	1	1	0	0	0	0	0	0	1	1	1	0	0	0	0	0	0	1	1	1	0	0	0	2.9	2.9	2.9	62.1	548	548;896;1458	0.0034203	2.0743	0	0	0
Q99LB0;F7B2G8;A2A4Y7	Q99LB0;F7B2G8	3;3;1	3;3;1	3;3;1	Deoxynucleotidyltransferase terminal-interacting protein 1	Dnttip1	sp|Q99LB0|TDIF1_MOUSE Deoxynucleotidyltransferase terminal-interacting protein 1 OS=Mus musculus OX=10090 GN=Dnttip1 PE=1 SV=1;tr|F7B2G8|F7B2G8_MOUSE Deoxynucleotidyltransferase terminal-interacting protein 1 (Fragment) OS=Mus musculus OX=10090 GN=Dnttip1	3	3	3	3	0	0	0	3	2	1	2	1	1	0	0	0	3	2	1	2	1	1	0	0	0	3	2	1	2	1	1	11.9	11.9	11.9	36.852	328	328;211;111	0	7.4574	0	0	0
F7BE40;Q6IMB2	F7BE40;Q6IMB2	3;2	3;2	3;2		Arl9	tr|F7BE40|F7BE40_MOUSE ADP-ribosylation factor-like 9 (Fragment) OS=Mus musculus OX=10090 GN=Arl9 PE=3 SV=1;tr|Q6IMB2|Q6IMB2_MOUSE ADP-ribosylation factor-like 9 OS=Mus musculus OX=10090 GN=Arl9 PE=2 SV=1	2	3	3	3	0	0	0	0	0	0	0	1	2	0	0	0	0	0	0	0	1	2	0	0	0	0	0	0	0	1	2	19.3	19.3	19.3	19.04	171	171;133	0	3.3879	0	0	0
F7BGR7;B0LM42;Q8C7Q4;F6TBN8;A0A494BAP6;Q5CZX8;S4R1A6;A0A494B9C0;A0A494BB78	F7BGR7;B0LM42;Q8C7Q4;F6TBN8	15;9;9;8;5;5;5;5;5	9;3;9;8;5;5;5;5;5	1;1;1;0;0;0;0;0;0	RNA-binding protein 4	Gm21992;Rbm4	tr|F7BGR7|F7BGR7_MOUSE Predicted gene 21992 OS=Mus musculus OX=10090 GN=Gm21992 PE=4 SV=1;tr|B0LM42|B0LM42_MOUSE Predicted gene 21992 OS=Mus musculus OX=10090 GN=Gm21992 PE=2 SV=1;sp|Q8C7Q4|RBM4_MOUSE RNA-binding protein 4 OS=Mus musculus OX=10090 GN=Rbm4	9	15	9	1	2	4	4	10	10	10	9	10	9	0	0	0	6	6	6	3	4	4	0	0	0	1	1	1	0	0	0	31.9	20.5	3.4	52.791	477	477;336;361;172;142;143;152;154;229	0	24.525	5.5	10.1	10.1
F7BX26;Q60676	F7BX26;Q60676	1;1	1;1	1;1	Serine/threonine-protein phosphatase;Serine/threonine-protein phosphatase 5	Ppp5c	tr|F7BX26|F7BX26_MOUSE Serine/threonine-protein phosphatase (Fragment) OS=Mus musculus OX=10090 GN=Ppp5c PE=1 SV=1;sp|Q60676|PPP5_MOUSE Serine/threonine-protein phosphatase 5 OS=Mus musculus OX=10090 GN=Ppp5c PE=1 SV=3	2	1	1	1	0	1	0	1	1	1	0	0	0	0	1	0	1	1	1	0	0	0	0	1	0	1	1	1	0	0	0	2.7	2.7	2.7	54.205	476	476;499	0.00091575	2.5696	0	2.7	0
Q3TML0;F7DBQ0;Q922R8	Q3TML0;F7DBQ0;Q922R8	9;9;8	9;9;8	9;9;8	Protein disulfide-isomerase A6	Pdia6	tr|Q3TML0|Q3TML0_MOUSE Protein disulfide-isomerase A6 OS=Mus musculus OX=10090 GN=Pdia6 PE=1 SV=1;tr|F7DBQ0|F7DBQ0_MOUSE Protein disulfide-isomerase A6 OS=Mus musculus OX=10090 GN=Pdia6 PE=1 SV=1;sp|Q922R8|PDIA6_MOUSE Protein disulfide-isomerase A6 OS=Mus	3	9	9	9	9	8	8	8	7	6	4	4	5	9	8	8	8	7	6	4	4	5	9	8	8	8	7	6	4	4	5	26.5	26.5	26.5	48.689	445	445;440;440	0	50.998	26.5	20.9	24.3
F8VPK0;A0A286YDT1	F8VPK0	3;1	3;1	3;1		Ttc37	sp|F8VPK0|SKI3_MOUSE Superkiller complex protein 3 OS=Mus musculus OX=10090 GN=Skic3 PE=3 SV=1	2	3	3	3	0	0	0	2	2	2	0	1	0	0	0	0	2	2	2	0	1	0	0	0	0	2	2	2	0	1	0	2.5	2.5	2.5	173.94	1563	1563;66	0	5.0269	0	0	0
F8VPL2;Q61194;A0A0U1RNT0;A0A0U1RNH9	F8VPL2;Q61194;A0A0U1RNT0	6;6;3;2	6;6;3;2	6;6;3;2	Phosphatidylinositol 4-phosphate 3-kinase C2 domain-containing subunit alpha	Pik3c2a	tr|F8VPL2|F8VPL2_MOUSE Phosphatidylinositol-4-phosphate 3-kinase catalytic subunit type 2 alpha OS=Mus musculus OX=10090 GN=Pik3c2a PE=1 SV=1;sp|Q61194|P3C2A_MOUSE Phosphatidylinositol 4-phosphate 3-kinase C2 domain-containing subunit alpha OS=Mus musculus	4	6	6	6	0	1	0	2	2	4	2	1	2	0	1	0	2	2	4	2	1	2	0	1	0	2	2	4	2	1	2	3.9	3.9	3.9	190.74	1686	1686;1686;448;364	0	7.8326	0	0.7	0
V9GX53;V9GWT6;V9GXH3;V9GXF0;V9GXP8;F8VPM7;Q99MI1	V9GX53;V9GWT6;V9GXH3;V9GXF0;V9GXP8;F8VPM7;Q99MI1	1;1;1;1;1;1;1	1;1;1;1;1;1;1	1;1;1;1;1;1;1	ELKS/Rab6-interacting/CAST family member 1	Erc1	tr|V9GX53|V9GX53_MOUSE ELKS/RAB6-interacting/CAST family member 1 OS=Mus musculus OX=10090 GN=Erc1 PE=1 SV=1;tr|V9GWT6|V9GWT6_MOUSE ELKS/RAB6-interacting/CAST family member 1 OS=Mus musculus OX=10090 GN=Erc1 PE=1 SV=1;tr|V9GXH3|V9GXH3_MOUSE ELKS/RAB6-inter	7	1	1	1	0	0	0	0	1	0	1	0	0	0	0	0	0	1	0	1	0	0	0	0	0	0	1	0	1	0	0	3.5	3.5	3.5	82.008	720	720;948;992;1088;1116;1120;1120	0	6.1519	0	0	0
F8VPP8;A0A2R8VHI0	F8VPP8	28;3	28;3	28;3		Zc3h7b	tr|F8VPP8|F8VPP8_MOUSE Zinc finger CCCH type containing 7B OS=Mus musculus OX=10090 GN=Zc3h7b PE=1 SV=1	2	28	28	28	0	0	0	6	6	5	20	20	24	0	0	0	6	6	5	20	20	24	0	0	0	6	6	5	20	20	24	28.3	28.3	28.3	110.29	982	982;151	0	149.49	0	0	0
F8VPR1;Q8BVA4	F8VPR1;Q8BVA4	3;3	3;3	3;3	Leiomodin-1	Lmod1	tr|F8VPR1|F8VPR1_MOUSE Leiomodin 1 (smooth muscle) OS=Mus musculus OX=10090 GN=Lmod1 PE=1 SV=1;sp|Q8BVA4|LMOD1_MOUSE Leiomodin-1 OS=Mus musculus OX=10090 GN=Lmod1 PE=1 SV=1	2	3	3	3	0	0	0	0	0	0	1	0	2	0	0	0	0	0	0	1	0	2	0	0	0	0	0	0	1	0	2	5.7	5.7	5.7	66.267	595	595;595	0	4.8034	0	0	0
F8VPY2;Q8C092	F8VPY2;Q8C092	4;4	4;4	4;4	Transcription initiation factor TFIID subunit 5	Taf5	tr|F8VPY2|F8VPY2_MOUSE TATA-box binding protein associated factor 5 OS=Mus musculus OX=10090 GN=Taf5 PE=1 SV=1;sp|Q8C092|TAF5_MOUSE Transcription initiation factor TFIID subunit 5 OS=Mus musculus OX=10090 GN=Taf5 PE=1 SV=1	2	4	4	4	0	0	0	0	0	0	2	3	2	0	0	0	0	0	0	2	3	2	0	0	0	0	0	0	2	3	2	7.6	7.6	7.6	86.951	801	801;801	0	4.616	0	0	0
F8VQ03;E9QA56;E9PYS9;Q6P907	F8VQ03;E9QA56;E9PYS9;Q6P907	4;3;3;3	4;3;3;3	4;3;3;3		Adam3	sp|F8VQ03|ADAM3_MOUSE A disintegrin and metallopeptidase domain 3 OS=Mus musculus OX=10090 GN=Adam3 PE=1 SV=1;tr|E9QA56|E9QA56_MOUSE A disintegrin and metallopeptidase domain 3 (cyritestin) OS=Mus musculus OX=10090 GN=Adam3 PE=1 SV=1;tr|E9PYS9|E9PYS9_MOUSE	4	4	4	4	1	1	1	0	1	0	1	3	1	1	1	1	0	1	0	1	3	1	1	1	1	0	1	0	1	3	1	5.6	5.6	5.6	91.443	822	822;94;120;352	0	12.022	1.3	1.3	1.3
Q8R418;F8VQ54;A0A1Y7VJD6	Q8R418;F8VQ54	28;28;6	28;28;6	28;28;6	Endoribonuclease Dicer	Dicer1	sp|Q8R418|DICER_MOUSE Endoribonuclease Dicer OS=Mus musculus OX=10090 GN=Dicer1 PE=1 SV=3;tr|F8VQ54|F8VQ54_MOUSE Endoribonuclease Dicer OS=Mus musculus OX=10090 GN=Dicer1 PE=1 SV=2	3	28	28	28	0	0	0	15	16	18	17	9	18	0	0	0	15	16	18	17	9	18	0	0	0	15	16	18	17	9	18	18	18	18	216.82	1916	1916;1916;421	0	95.125	0	0	0
F8VQC1;E9Q740	F8VQC1;E9Q740	8;7	8;7	8;7	Signal recognition particle subunit SRP72	Srp72	tr|F8VQC1|F8VQC1_MOUSE Signal recognition particle subunit SRP72 OS=Mus musculus OX=10090 GN=Srp72 PE=1 SV=1;tr|E9Q740|E9Q740_MOUSE Signal recognition particle subunit SRP72 OS=Mus musculus OX=10090 GN=Srp72 PE=1 SV=1	2	8	8	8	0	0	0	1	0	0	4	6	4	0	0	0	1	0	0	4	6	4	0	0	0	1	0	0	4	6	4	14.3	14.3	14.3	74.656	671	671;610	0	17.535	0	0	0
F8VQE9;Q8VHH5;A0A1D5RMG4;A0A0G2JER6;A0A0G2JDW1;A0A087WRF2;E9Q3K3;Q8BXK8	F8VQE9;Q8VHH5;A0A1D5RMG4;A0A0G2JER6;A0A0G2JDW1;A0A087WRF2;E9Q3K3;Q8BXK8	2;2;1;1;1;1;1;1	2;2;1;1;1;1;1;1	2;2;1;1;1;1;1;1	Arf-GAP with GTPase, ANK repeat and PH domain-containing protein 3;Arf-GAP with GTPase, ANK repeat and PH domain-containing protein 1	Agap3;Agap1	tr|F8VQE9|F8VQE9_MOUSE ArfGAP with GTPase domain, ankyrin repeat and PH domain 3 OS=Mus musculus OX=10090 GN=Agap3 PE=1 SV=1;sp|Q8VHH5|AGAP3_MOUSE Arf-GAP with GTPase, ANK repeat and PH domain-containing protein 3 OS=Mus musculus OX=10090 GN=Agap3 PE=1 SV=	8	2	2	2	0	0	0	1	0	1	1	1	2	0	0	0	1	0	1	1	1	2	0	0	0	1	0	1	1	1	2	3	3	3	97.694	910	910;910;396;445;578;804;1056;857	0	8.1071	0	0	0
F8WHZ9;F8WGR0;Q9QYC0;E9Q1K3;F6RDR0;F6V4G5;D3Z0T1;A0A0J9YVI4;Q9QYB8	F8WHZ9;F8WGR0;Q9QYC0;E9Q1K3	13;13;13;12;3;2;2;2;1	13;13;13;12;3;2;2;2;1	13;13;13;12;3;2;2;2;1	Alpha-adducin	Add1	tr|F8WHZ9|F8WHZ9_MOUSE Adducin 1 (alpha) OS=Mus musculus OX=10090 GN=Add1 PE=1 SV=1;tr|F8WGR0|F8WGR0_MOUSE Adducin 1 (alpha) OS=Mus musculus OX=10090 GN=Add1 PE=1 SV=1;sp|Q9QYC0|ADDA_MOUSE Alpha-adducin OS=Mus musculus OX=10090 GN=Add1 PE=1 SV=2;tr|E9Q1K3|	9	13	13	13	2	2	1	4	4	4	12	10	11	2	2	1	4	4	4	12	10	11	2	2	1	4	4	4	12	10	11	24.3	24.3	24.3	73.163	662	662;663;735;660;160;135;141;248;725	0	37.556	3.3	3.3	1.8
F8WGW3;Q497V5;B7ZWI7;B7ZWI4;Q8CHZ0	F8WGW3;Q497V5	4;4;1;1;1	4;4;1;1;1	4;4;1;1;1	S1 RNA-binding domain-containing protein 1	Srbd1	tr|F8WGW3|F8WGW3_MOUSE S1 RNA binding domain 1 OS=Mus musculus OX=10090 GN=Srbd1 PE=1 SV=1;sp|Q497V5|SRBD1_MOUSE S1 RNA-binding domain-containing protein 1 OS=Mus musculus OX=10090 GN=Srbd1 PE=2 SV=3	5	4	4	4	0	0	0	0	0	0	3	2	2	0	0	0	0	0	0	3	2	2	0	0	0	0	0	0	3	2	2	4.6	4.6	4.6	110.19	981	981;982;170;195;280	0	6.5106	0	0	0
F8WHM5;Q61543;E9PWD8;F6RSH1	F8WHM5;Q61543	5;5;1;1	5;5;1;1	5;5;1;1	Golgi apparatus protein 1	Glg1	tr|F8WHM5|F8WHM5_MOUSE Golgi apparatus protein 1 (Fragment) OS=Mus musculus OX=10090 GN=Glg1 PE=1 SV=1;sp|Q61543|GSLG1_MOUSE Golgi apparatus protein 1 OS=Mus musculus OX=10090 GN=Glg1 PE=1 SV=1	4	5	5	5	0	0	0	1	2	1	4	5	3	0	0	0	1	2	1	4	5	3	0	0	0	1	2	1	4	5	3	4.8	4.8	4.8	132.35	1163	1163;1175;302;591	0	18.581	0	0	0
F8WHU5;Q4VA53	F8WHU5;Q4VA53	10;10	10;10	9;9	Sister chromatid cohesion protein PDS5 homolog B	Pds5b	tr|F8WHU5|F8WHU5_MOUSE PDS5 cohesin associated factor B OS=Mus musculus OX=10090 GN=Pds5b PE=1 SV=1;sp|Q4VA53|PDS5B_MOUSE Sister chromatid cohesion protein PDS5 homolog B OS=Mus musculus OX=10090 GN=Pds5b PE=1 SV=1	2	10	10	9	0	0	0	0	0	0	5	7	5	0	0	0	0	0	0	5	7	5	0	0	0	0	0	0	4	7	4	10.3	10.3	9.5	164.76	1449	1449;1446	0	31.095	0	0	0
Q5SW13;F8WHZ7;Q5SW15;Q9CQG2	Q5SW13;F8WHZ7;Q5SW15;Q9CQG2	1;1;1;1	1;1;1;1	1;1;1;1	Methyltransferase-like protein;Methyltransferase-like protein 16	Mettl16	tr|Q5SW13|Q5SW13_MOUSE Methyltransferase like 16 (Fragment) OS=Mus musculus OX=10090 GN=Mettl16 PE=1 SV=1;tr|F8WHZ7|F8WHZ7_MOUSE Methyltransferase 10 domain-containing protein OS=Mus musculus OX=10090 GN=Mettl16 PE=1 SV=1;tr|Q5SW15|Q5SW15_MOUSE U6 small nu	4	1	1	1	0	0	0	0	0	0	0	1	0	0	0	0	0	0	0	0	1	0	0	0	0	0	0	0	0	1	0	36.4	36.4	36.4	3.9425	33	33;215;593;553	0.0086854	1.5056	0	0	0
F8WID5	F8WID5	14	1	0		Tpm1	tr|F8WID5|F8WID5_MOUSE Tropomyosin 1, alpha OS=Mus musculus OX=10090 GN=Tpm1 PE=1 SV=1	1	14	1	0	11	10	13	1	2	1	2	2	2	1	1	1	0	0	0	0	0	0	0	0	0	0	0	0	0	0	0	33.1	4.3	0	37.412	326	326	0	3.093	24.2	27.3	29.1
H7BXB9;F8WIU1;Q9D1K7	H7BXB9;F8WIU1;Q9D1K7	1;1;1	1;1;1	1;1;1	UPF0687 protein C20orf27 homolog	1700037H04Rik	tr|H7BXB9|H7BXB9_MOUSE Adipose-secreted signaling protein (Fragment) OS=Mus musculus OX=10090 GN=Adissp PE=1 SV=1;tr|F8WIU1|F8WIU1_MOUSE Adipose-secreted signaling protein OS=Mus musculus OX=10090 GN=Adissp PE=1 SV=1;sp|Q9D1K7|ADSSP_MOUSE Adipose-secreted	3	1	1	1	1	0	0	0	0	0	0	0	0	1	0	0	0	0	0	0	0	0	1	0	0	0	0	0	0	0	0	9.9	9.9	9.9	15.773	141	141;177;174	0.0087406	1.5512	9.9	0	0
Q3T9X3;Q3TCR7;G3X9G4;F8WIV5;P39054;G3UZZ3;A0A0J9YUE9;E9QLL2;A0A0J9YUN4;Q8BZ98;P39053;G3UXX2	Q3T9X3;Q3TCR7;G3X9G4;F8WIV5;P39054;G3UZZ3	9;9;9;9;9;8;3;3;3;3;3;2	9;9;9;9;9;8;3;3;3;3;3;2	9;9;9;9;9;8;3;3;3;3;3;2	Dynamin-2	Dnm2	tr|Q3T9X3|Q3T9X3_MOUSE dynamin GTPase OS=Mus musculus OX=10090 GN=Dnm2 PE=1 SV=1;tr|Q3TCR7|Q3TCR7_MOUSE dynamin GTPase OS=Mus musculus OX=10090 GN=Dnm2 PE=1 SV=1;tr|G3X9G4|G3X9G4_MOUSE dynamin GTPase OS=Mus musculus OX=10090 GN=Dnm2 PE=1 SV=1;tr|F8WIV5|F8W	12	9	9	9	1	1	1	3	3	0	5	4	4	1	1	1	3	3	0	5	4	4	1	1	1	3	3	0	5	4	4	11.6	11.6	11.6	97.194	860	860;869;870;870;870;807;835;863;864;863;867;248	0	10.364	0.8	1.2	0.9
F8WJ41;P62245;D3Z712;D3YVB4	F8WJ41;P62245;D3Z712;D3YVB4	7;7;5;4	7;7;5;4	7;7;5;4	40S ribosomal protein S15a	Rps15a	tr|F8WJ41|F8WJ41_MOUSE 40S ribosomal protein S15a (Fragment) OS=Mus musculus OX=10090 GN=Rps15a PE=1 SV=1;sp|P62245|RS15A_MOUSE Small ribosomal subunit protein uS8 OS=Mus musculus OX=10090 GN=Rps15a PE=1 SV=2;tr|D3Z712|D3Z712_MOUSE 40S ribosomal protein S1	4	7	7	7	6	5	7	6	5	6	4	3	4	6	5	7	6	5	6	4	3	4	6	5	7	6	5	6	4	3	4	54.6	54.6	54.6	12.31	108	108;130;78;71	0	16.196	48.1	46.3	54.6
F8WJ43;P46662;F7DBY2;F7D6P2;E9PW99	F8WJ43;P46662	3;3;1;1;1	3;3;1;1;1	3;3;1;1;1	Merlin	Nf2	tr|F8WJ43|F8WJ43_MOUSE Neurofibromin 2 (Fragment) OS=Mus musculus OX=10090 GN=Nf2 PE=1 SV=1;sp|P46662|MERL_MOUSE Merlin OS=Mus musculus OX=10090 GN=Nf2 PE=1 SV=2	5	3	3	3	0	0	0	0	0	0	1	1	2	0	0	0	0	0	0	1	1	2	0	0	0	0	0	0	1	1	2	5.8	5.8	5.8	60.887	521	521;596;140;159;251	0.00089246	2.3908	0	0	0
F8WJA0;Q9ESV0;A0A1Y7VLU4;A0A1Y7VKX7	F8WJA0;Q9ESV0;A0A1Y7VLU4;A0A1Y7VKX7	2;2;1;1	2;2;1;1	2;2;1;1	ATP-dependent RNA helicase DDX24	Ddx24	tr|F8WJA0|F8WJA0_MOUSE ATP-dependent RNA helicase OS=Mus musculus OX=10090 GN=Ddx24 PE=1 SV=1;sp|Q9ESV0|DDX24_MOUSE ATP-dependent RNA helicase DDX24 OS=Mus musculus OX=10090 GN=Ddx24 PE=1 SV=2;tr|A0A1Y7VLU4|A0A1Y7VLU4_MOUSE DEAD box helicase 24 OS=Mus musc	4	2	2	2	0	0	0	0	1	0	0	1	0	0	0	0	0	1	0	0	1	0	0	0	0	0	1	0	0	1	0	2.3	2.3	2.3	101.37	903	903;857;119;791	0.0049648	1.8049	0	0	0
F8WJG3;P62996	F8WJG3;P62996	14;14	14;14	13;13	Transformer-2 protein homolog beta	Tra2b	tr|F8WJG3|F8WJG3_MOUSE Transformer 2 beta OS=Mus musculus OX=10090 GN=Tra2b PE=1 SV=1;sp|P62996|TRA2B_MOUSE Transformer-2 protein homolog beta OS=Mus musculus OX=10090 GN=Tra2b PE=1 SV=1	2	14	14	13	0	0	0	12	9	11	12	11	12	0	0	0	12	9	11	12	11	12	0	0	0	11	8	10	12	10	11	64.4	64.4	59	21.935	188	188;288	0	71.863	0	0	0
Q99L47;F8WJK8;E9Q1V0	Q99L47;F8WJK8;E9Q1V0	5;5;3	5;5;3	5;5;3	Hsc70-interacting protein	St13	sp|Q99L47|F10A1_MOUSE Hsc70-interacting protein OS=Mus musculus OX=10090 GN=St13 PE=1 SV=1;tr|F8WJK8|F8WJK8_MOUSE Suppression of tumorigenicity 13 OS=Mus musculus OX=10090 GN=St13 PE=1 SV=1;tr|E9Q1V0|E9Q1V0_MOUSE Suppression of tumorigenicity 13 (Fragment)	3	5	5	5	5	3	4	3	1	2	0	0	0	5	3	4	3	1	2	0	0	0	5	3	4	3	1	2	0	0	0	11.6	11.6	11.6	41.655	371	371;362;129	0	8.504	11.6	7.3	11.1
G3UVU2;D3YW09;Q62203;D3Z5A6	G3UVU2;D3YW09;Q62203	7;5;5;1	7;5;5;1	7;5;5;1	Splicing factor 3A subunit 2	Sf3a2	tr|G3UVU2|G3UVU2_MOUSE Splicing factor 3a, subunit 2 OS=Mus musculus OX=10090 GN=Sf3a2 PE=1 SV=1;tr|D3YW09|D3YW09_MOUSE Splicing factor 3a, subunit 2 OS=Mus musculus OX=10090 GN=Sf3a2 PE=1 SV=1;sp|Q62203|SF3A2_MOUSE Splicing factor 3A subunit 2 OS=Mus musc	4	7	7	7	0	0	0	1	1	1	5	5	2	0	0	0	1	1	1	5	5	2	0	0	0	1	1	1	5	5	2	20.2	20.2	20.2	51.278	485	485;194;475;67	0	12.543	0	0	0
G3UVV4;P17710;D3YYR4;D3Z365;Q91W97;E9Q9M6;B4YB29;D3Z105	G3UVV4;P17710	15;15;4;4;2;1;1;1	15;15;4;4;2;1;1;1	12;12;3;3;1;0;1;1	Hexokinase;Hexokinase-1	Hk1	tr|G3UVV4|G3UVV4_MOUSE hexokinase OS=Mus musculus OX=10090 GN=Hk1 PE=1 SV=1;sp|P17710|HXK1_MOUSE Hexokinase-1 OS=Mus musculus OX=10090 GN=Hk1 PE=1 SV=3	8	15	15	12	6	6	9	4	5	3	5	5	7	6	6	9	4	5	3	5	5	7	5	5	8	3	5	3	4	5	6	18	18	15.2	101.87	917	917;974;184;223;915;43;49;80	0	24.202	7.4	7.6	11.2
G3UW82;Q5SX40;P13542;Q5SX39	G3UW82;Q5SX40;P13542;Q5SX39	3;3;2;2	2;2;1;1	2;2;1;1	Myosin-1;Myosin-8;Myosin-4	Myh2;Myh1;Myh8;Myh4	tr|G3UW82|G3UW82_MOUSE Myosin, heavy polypeptide 2, skeletal muscle, adult OS=Mus musculus OX=10090 GN=Myh2 PE=1 SV=1;sp|Q5SX40|MYH1_MOUSE Myosin-1 OS=Mus musculus OX=10090 GN=Myh1 PE=1 SV=1;sp|P13542|MYH8_MOUSE Myosin-8 OS=Mus musculus OX=10090 GN=Myh8 PE	4	3	2	2	1	1	1	0	0	1	1	1	1	0	0	0	0	0	1	1	1	0	0	0	0	0	0	1	1	1	0	1.4	1	1	223.22	1942	1942;1942;1937;1939	1	-2	0.5	0.5	0.5
G3UY19;G3UW86;G3UWQ7;Q99K43;G3XA79;G3UYX6;G3UXT4	G3UY19;G3UW86;G3UWQ7;Q99K43;G3XA79	5;5;5;5;4;2;1	5;5;5;5;4;2;1	5;5;5;5;4;2;1	Protein regulator of cytokinesis 1	Prc1	tr|G3UY19|G3UY19_MOUSE Protein regulator of cytokinesis 1 OS=Mus musculus OX=10090 GN=Prc1 PE=1 SV=1;tr|G3UW86|G3UW86_MOUSE Protein regulator of cytokinesis 1 OS=Mus musculus OX=10090 GN=Prc1 PE=1 SV=1;tr|G3UWQ7|G3UWQ7_MOUSE Protein regulator of cytokinesi	7	5	5	5	0	0	0	2	1	1	4	1	2	0	0	0	2	1	1	4	1	2	0	0	0	2	1	1	4	1	2	13.4	13.4	13.4	66.505	566	566;606;620;603;525;249;235	0	8.3225	0	0	0
G3UWB9;Q9DAM3	G3UWB9;Q9DAM3	2;2	2;2	2;2	Heat shock protein beta-9	Hspb9	tr|G3UWB9|G3UWB9_MOUSE Heat shock protein, alpha-crystallin-related, B9 OS=Mus musculus OX=10090 GN=Hspb9 PE=1 SV=1;sp|Q9DAM3|HSPB9_MOUSE Heat shock protein beta-9 OS=Mus musculus OX=10090 GN=Hspb9 PE=2 SV=1	2	2	2	2	0	0	1	1	0	1	2	0	1	0	0	1	1	0	1	2	0	1	0	0	1	1	0	1	2	0	1	13.1	13.1	13.1	21.721	199	199;168	0	4.8052	0	0	6
G8JL74;G3UXA6;Q8BHD7;G3UZ01;G3UY95;G3UXZ8	G8JL74;G3UXA6;Q8BHD7;G3UZ01	10;10;10;9;4;2	5;5;5;5;1;1	5;5;5;5;1;1	Polypyrimidine tract-binding protein 3	Ptbp3	tr|G8JL74|G8JL74_MOUSE Polypyrimidine tract binding protein 3 OS=Mus musculus OX=10090 GN=Ptbp3 PE=1 SV=1;tr|G3UXA6|G3UXA6_MOUSE Polypyrimidine tract binding protein 3 OS=Mus musculus OX=10090 GN=Ptbp3 PE=1 SV=1;sp|Q8BHD7|PTBP3_MOUSE Polypyrimidine tract-b	6	10	5	5	1	1	1	6	4	5	5	8	8	0	0	0	2	0	0	2	4	4	0	0	0	2	0	0	2	4	4	16.5	10.2	10.2	59.465	551	551;554;523;457;146;188	0	20.626	1.5	1.5	1.5
G3UXG7;P67871;G3UXU2;G3UZJ5;G3UZA4;G3UZX4	G3UXG7;P67871;G3UXU2;G3UZJ5	5;5;3;3;2;2	5;5;3;3;2;2	5;5;3;3;2;2	Casein kinase II subunit beta	Csnk2b	tr|G3UXG7|G3UXG7_MOUSE Casein kinase II subunit beta OS=Mus musculus OX=10090 GN=Csnk2b PE=1 SV=1;sp|P67871|CSK2B_MOUSE Casein kinase II subunit beta OS=Mus musculus OX=10090 GN=Csnk2b PE=1 SV=1;tr|G3UXU2|G3UXU2_MOUSE Casein kinase II subunit beta (Fragmen	6	5	5	5	0	1	1	1	0	1	1	2	4	0	1	1	1	0	1	1	2	4	0	1	1	1	0	1	1	2	4	32.3	32.3	32.3	18.926	164	164;215;180;206;122;257	0	12.352	0	5.5	5.5
G3UXL2;Q9D7G0;Q9CS42	G3UXL2;Q9D7G0;Q9CS42	8;8;4	8;8;4	5;5;2	Ribose-phosphate pyrophosphokinase 1;Ribose-phosphate pyrophosphokinase 2	Prps1l3;Prps1;Prps2	tr|G3UXL2|G3UXL2_MOUSE ribose-phosphate diphosphokinase OS=Mus musculus OX=10090 GN=Prps1l3 PE=3 SV=1;sp|Q9D7G0|PRPS1_MOUSE Ribose-phosphate pyrophosphokinase 1 OS=Mus musculus OX=10090 GN=Prps1 PE=1 SV=4;sp|Q9CS42|PRPS2_MOUSE Ribose-phosphate pyrophosphok	3	8	8	5	0	3	1	6	6	6	6	7	6	0	3	1	6	6	6	6	7	6	0	1	0	3	3	4	3	4	4	27.4	27.4	14.5	34.824	318	318;318;318	0	44.495	0	13.2	3.8
G3UY42;Q8CCS6;D3YUB9;D3Z5F7;B7ZP52;Q5XFR0;G3UX74	G3UY42;Q8CCS6;D3YUB9;D3Z5F7	16;16;13;13;2;2;1	16;16;13;13;2;2;1	6;6;3;3;0;0;1	Polyadenylate-binding protein 2	Pabpn1;Gm20521	tr|G3UY42|G3UY42_MOUSE Poly(A) binding protein, nuclear 1 OS=Mus musculus OX=10090 GN=Pabpn1 PE=1 SV=1;sp|Q8CCS6|PABP2_MOUSE Polyadenylate-binding protein 2 OS=Mus musculus OX=10090 GN=Pabpn1 PE=1 SV=3;tr|D3YUB9|D3YUB9_MOUSE Poly(A) binding protein, nuclea	7	16	16	6	1	1	1	8	7	7	14	15	14	1	1	1	8	7	7	14	15	14	1	1	1	3	1	2	5	6	5	51.1	51.1	26	34.003	319	319;302;164;333;288;273;73	0	323.31	5	5	5
G3UYD0;Q3UHU8;Q9ESZ8;G3UYJ6;G3UX27;G3UWV2;G3UYD7;G3UZU4;Q99NI3;G3UY14;G3UWP6	G3UYD0;Q3UHU8;Q9ESZ8	21;21;21;10;4;4;3;3;2;1;1	21;21;21;10;4;4;3;3;2;1;1	21;21;21;10;4;4;3;3;2;1;1	General transcription factor II-I	Gtf2i	tr|G3UYD0|G3UYD0_MOUSE General transcription factor II I OS=Mus musculus OX=10090 GN=Gtf2i PE=1 SV=1;tr|Q3UHU8|Q3UHU8_MOUSE General transcription factor II I OS=Mus musculus OX=10090 GN=Gtf2i PE=1 SV=1;sp|Q9ESZ8|GTF2I_MOUSE General transcription factor II-	11	21	21	21	0	0	0	11	12	14	10	13	14	0	0	0	11	12	14	10	13	14	0	0	0	11	12	14	10	13	14	24.9	24.9	24.9	103.08	913	913;962;998;437;167;169;150;159;936;79;86	0	44.453	0	0	0
Q924M5;G3UYE8;F6TV20	Q924M5;G3UYE8;F6TV20	6;6;4	6;6;4	6;6;4	Protein boule-like	Boll	sp|Q924M5|BOLL_MOUSE Protein boule-like OS=Mus musculus OX=10090 GN=Boll PE=1 SV=3;tr|G3UYE8|G3UYE8_MOUSE Boule homolog, RNA binding protein (Fragment) OS=Mus musculus OX=10090 GN=Boll PE=1 SV=1;tr|F6TV20|F6TV20_MOUSE Boule homolog, RNA binding protein OS=	3	6	6	6	1	2	1	5	3	4	5	5	5	1	2	1	5	3	4	5	5	5	1	2	1	5	3	4	5	5	5	17.1	17.1	17.1	32.189	293	293;282;87	0	8.7257	3.1	6.1	3.1
G3UYG6;Q6Y7W8;G3UWR2;G3UYR9;E9Q2M5;G3UZX7	G3UYG6;Q6Y7W8;G3UWR2;G3UYR9	7;7;5;4;3;1	7;7;5;4;3;1	7;7;5;4;3;1	PERQ amino acid-rich with GYF domain-containing protein 2	Gigyf2	tr|G3UYG6|G3UYG6_MOUSE GRB10 interacting GYF protein 2 OS=Mus musculus OX=10090 GN=Gigyf2 PE=1 SV=1;sp|Q6Y7W8|GGYF2_MOUSE GRB10-interacting GYF protein 2 OS=Mus musculus OX=10090 GN=Gigyf2 PE=1 SV=2;tr|G3UWR2|G3UWR2_MOUSE GRB10 interacting GYF protein 2 OS	6	7	7	7	0	1	0	4	4	2	5	1	3	0	1	0	4	4	2	5	1	3	0	1	0	4	4	2	5	1	3	8.9	8.9	8.9	148.58	1285	1285;1291;1122;877;721;787	0	92.604	0	0.9	0
G3UYM5	G3UYM5	9	1	1		Pcbp3	tr|G3UYM5|G3UYM5_MOUSE Poly(rC) binding protein 3 (Fragment) OS=Mus musculus OX=10090 GN=Pcbp3 PE=1 SV=1	1	9	1	1	1	1	1	4	4	4	6	9	7	0	0	0	0	0	0	1	1	1	0	0	0	0	0	0	1	1	1	68.3	18	18	16.939	161	161	0	40.892	7.5	7.5	7.5
G3UYQ3;Q9Z1X2	G3UYQ3;Q9Z1X2	1;1	1;1	1;1	Phosphatidylserine synthase 2	Ptdss2	tr|G3UYQ3|G3UYQ3_MOUSE Phosphatidylserine synthase 2 OS=Mus musculus OX=10090 GN=Ptdss2 PE=1 SV=1;sp|Q9Z1X2|PTSS2_MOUSE Phosphatidylserine synthase 2 OS=Mus musculus OX=10090 GN=Ptdss2 PE=1 SV=2	2	1	1	1	1	0	1	1	1	1	0	0	0	1	0	1	1	1	1	0	0	0	1	0	1	1	1	1	0	0	0	16.2	16.2	16.2	8.8597	80	80;473	0	5.1468	16.2	0	16.2
G3UYU4;O08917	G3UYU4;O08917	1;1	1;1	1;1	Flotillin-1	Flot1	tr|G3UYU4|G3UYU4_MOUSE Flotillin OS=Mus musculus OX=10090 GN=Flot1 PE=1 SV=1;sp|O08917|FLOT1_MOUSE Flotillin-1 OS=Mus musculus OX=10090 GN=Flot1 PE=1 SV=1	2	1	1	1	0	1	1	0	1	0	0	0	0	0	1	1	0	1	0	0	0	0	0	1	1	0	1	0	0	0	0	4.7	4.7	4.7	42.238	380	380;428	1	-2	0	4.7	4.7
G3UYU5;Q8R1F9	G3UYU5;Q8R1F9	4;4	4;4	4;4	Ribonuclease P protein subunit p40	Rpp40	tr|G3UYU5|G3UYU5_MOUSE Ribonuclease P 40 subunit OS=Mus musculus OX=10090 GN=Rpp40 PE=1 SV=1;sp|Q8R1F9|RPP40_MOUSE Ribonuclease P protein subunit p40 OS=Mus musculus OX=10090 GN=Rpp40 PE=2 SV=2	2	4	4	4	0	0	0	0	0	0	2	3	1	0	0	0	0	0	0	2	3	1	0	0	0	0	0	0	2	3	1	10.3	10.3	10.3	39.121	340	340;363	0	4.7897	0	0	0
G3UYV7;P62858	G3UYV7;P62858	1;1	1;1	1;1	40S ribosomal protein S28	Rps28	tr|G3UYV7|G3UYV7_MOUSE Small ribosomal subunit protein eS28 (Fragment) OS=Mus musculus OX=10090 GN=Rps28 PE=1 SV=1;sp|P62858|RS28_MOUSE Small ribosomal subunit protein eS28 OS=Mus musculus OX=10090 GN=Rps28 PE=1 SV=1	2	1	1	1	0	1	1	0	0	0	0	1	0	0	1	1	0	0	0	0	1	0	0	1	1	0	0	0	0	1	0	26.8	26.8	26.8	6.3442	56	56;69	0.00089847	2.4334	0	26.8	26.8
G3UZA0;Q8BGA5	G3UZA0;Q8BGA5	1;1	1;1	1;1	KRR1 small subunit processome component homolog	Krr1	tr|G3UZA0|G3UZA0_MOUSE KRR1 small subunit processome component OS=Mus musculus OX=10090 GN=Krr1 PE=1 SV=1;sp|Q8BGA5|KRR1_MOUSE KRR1 small subunit processome component homolog OS=Mus musculus OX=10090 GN=Krr1 PE=2 SV=1	2	1	1	1	0	0	0	0	0	0	0	0	1	0	0	0	0	0	0	0	0	1	0	0	0	0	0	0	0	0	1	4.3	4.3	4.3	36.66	323	323;380	0.0029966	2.0834	0	0	0
G3UZJ4;H3BJQ7;P99029;A0A494BAZ4	G3UZJ4;H3BJQ7;P99029;A0A494BAZ4	2;2;2;1	2;2;2;1	2;2;2;1	Peroxiredoxin-5, mitochondrial	Prdx5	tr|G3UZJ4|G3UZJ4_MOUSE thioredoxin-dependent peroxiredoxin OS=Mus musculus OX=10090 GN=Prdx5 PE=1 SV=1;tr|H3BJQ7|H3BJQ7_MOUSE Peroxiredoxin-5 OS=Mus musculus OX=10090 GN=Prdx5 PE=1 SV=1;sp|P99029|PRDX5_MOUSE Peroxiredoxin-5, mitochondrial OS=Mus musculus O	4	2	2	2	2	2	2	2	1	0	0	1	0	2	2	2	2	1	0	0	1	0	2	2	2	2	1	0	0	1	0	17.5	17.5	17.5	17.253	166	166;213;210;142	0.00089726	2.4242	17.5	17.5	17.5
G3UZS6	G3UZS6	2	1	1		Paip1	tr|G3UZS6|G3UZS6_MOUSE Polyadenylate binding protein-interacting protein 1 (Fragment) OS=Mus musculus OX=10090 GN=Paip1 PE=1 SV=2	1	2	1	1	0	0	0	1	1	1	1	2	2	0	0	0	1	1	1	1	1	1	0	0	0	1	1	1	1	1	1	9.8	9.8	9.8	30.057	276	276	0.0033628	1.9125	0	0	0
G3UZY0;Q8K410	G3UZY0;Q8K410	1;1	1;1	1;1	Disintegrin and metalloproteinase domain-containing protein 32	Adam32	tr|G3UZY0|G3UZY0_MOUSE A disintegrin and metallopeptidase domain 32 (Fragment) OS=Mus musculus OX=10090 GN=Adam32 PE=1 SV=1;sp|Q8K410|ADA32_MOUSE Disintegrin and metalloproteinase domain-containing protein 32 OS=Mus musculus OX=10090 GN=Adam32 PE=1 SV=3	2	1	1	1	0	0	0	0	0	1	0	0	0	0	0	0	0	0	1	0	0	0	0	0	0	0	0	1	0	0	0	9.2	9.2	9.2	19.727	173	173;754	0.004908	1.7502	0	0	0
G3X8P9;O54754	G3X8P9;O54754	1;1	1;1	1;1	Aldehyde oxidase 1	Aox1	tr|G3X8P9|G3X8P9_MOUSE aldehyde oxidase OS=Mus musculus OX=10090 GN=Aox1 PE=1 SV=1;sp|O54754|AOXA_MOUSE Aldehyde oxidase 1 OS=Mus musculus OX=10090 GN=Aox1 PE=1 SV=2	2	1	1	1	0	0	0	0	0	0	1	0	1	0	0	0	0	0	0	1	0	1	0	0	0	0	0	0	1	0	1	0.5	0.5	0.5	146.65	1333	1333;1333	1	-2	0	0	0
G3X8R4;Q9DBA9;E9QKD9;D6RJL7;E9PWY2	G3X8R4;Q9DBA9;E9QKD9	6;6;5;1;1	6;6;5;1;1	6;6;5;1;1	General transcription factor IIH subunit 1	Gtf2h1	tr|G3X8R4|G3X8R4_MOUSE General transcription factor II H, polypeptide 1 OS=Mus musculus OX=10090 GN=Gtf2h1 PE=1 SV=1;sp|Q9DBA9|TF2H1_MOUSE General transcription factor IIH subunit 1 OS=Mus musculus OX=10090 GN=Gtf2h1 PE=1 SV=2;tr|E9QKD9|E9QKD9_MOUSE Genera	5	6	6	6	0	0	0	1	2	0	4	5	3	0	0	0	1	2	0	4	5	3	0	0	0	1	2	0	4	5	3	16.8	16.8	16.8	61.791	547	547;547;553;51;144	0	22.116	0	0	0
G3X8U8;O88622;E9Q088;A0A2I3BRU5;E9Q7T9;E9Q954	G3X8U8;O88622;E9Q088;A0A2I3BRU5	14;13;12;7;3;1	14;13;12;7;3;1	14;13;12;7;3;1	Poly(ADP-ribose) glycohydrolase	Parg	tr|G3X8U8|G3X8U8_MOUSE poly(ADP-ribose) glycohydrolase OS=Mus musculus OX=10090 GN=Parg PE=1 SV=1;sp|O88622|PARG_MOUSE Poly(ADP-ribose) glycohydrolase OS=Mus musculus OX=10090 GN=Parg PE=1 SV=2;tr|E9Q088|E9Q088_MOUSE poly(ADP-ribose) glycohydrolase OS=Mus	6	14	14	14	0	0	0	5	4	6	11	8	8	0	0	0	5	4	6	11	8	8	0	0	0	5	4	6	11	8	8	17	17	17	108.55	961	961;969;456;661;43;186	0	48.637	0	0	0
G3X8X0;Q05BH3	G3X8X0;Q05BH3	4;3	3;2	3;2		Dhx16	tr|G3X8X0|G3X8X0_MOUSE RNA helicase OS=Mus musculus OX=10090 GN=Dhx16 PE=1 SV=1;tr|Q05BH3|Q05BH3_MOUSE DEAH (Asp-Glu-Ala-His) box polypeptide 16 OS=Mus musculus OX=10090 GN=Dhx16 PE=1 SV=1	2	4	3	3	0	0	0	2	2	3	3	2	4	0	0	0	1	1	2	2	1	3	0	0	0	1	1	2	2	1	3	4.6	3.7	3.7	119.07	1044	1044;741	0	8.2789	0	0	0
G3X920;Q9DBR3	G3X920;Q9DBR3	1;1	1;1	1;1	Armadillo repeat-containing protein 8	Armc8	tr|G3X920|G3X920_MOUSE Armadillo repeat-containing protein 8 OS=Mus musculus OX=10090 GN=Armc8 PE=1 SV=1;sp|Q9DBR3|ARMC8_MOUSE Armadillo repeat-containing protein 8 OS=Mus musculus OX=10090 GN=Armc8 PE=1 SV=2	2	1	1	1	0	0	0	0	0	0	0	1	1	0	0	0	0	0	0	0	1	1	0	0	0	0	0	0	0	1	1	1.6	1.6	1.6	75.401	673	673;673	0	2.8114	0	0	0
S4R1Y5;G3X926;Q9JJ80	S4R1Y5;G3X926;Q9JJ80	1;1;1	1;1;1	1;1;1	Ribosome production factor 2 homolog	Rpf2	tr|S4R1Y5|S4R1Y5_MOUSE Ribosome production factor 2 homolog (Fragment) OS=Mus musculus OX=10090 GN=Rpf2 PE=1 SV=1;tr|G3X926|G3X926_MOUSE Ribosome production factor 2 homolog OS=Mus musculus OX=10090 GN=Rpf2 PE=1 SV=1;sp|Q9JJ80|RPF2_MOUSE Ribosome productio	3	1	1	1	0	0	0	0	0	0	0	1	0	0	0	0	0	0	0	0	1	0	0	0	0	0	0	0	0	1	0	5.1	5.1	5.1	29.66	257	257;273;306	0.0083565	1.5583	0	0	0
G3X956;Q920B9	G3X956;Q920B9	1;1	1;1	1;1	FACT complex subunit SPT16	Supt16;Supt16h	tr|G3X956|G3X956_MOUSE FACT complex subunit OS=Mus musculus OX=10090 GN=Supt16 PE=1 SV=1;sp|Q920B9|SP16H_MOUSE FACT complex subunit SPT16 OS=Mus musculus OX=10090 GN=Supt16h PE=1 SV=2	2	1	1	1	0	0	0	0	0	0	0	0	1	0	0	0	0	0	0	0	0	1	0	0	0	0	0	0	0	0	1	1.6	1.6	1.6	119.84	1047	1047;1047	0	6.5216	0	0	0
G3X970;E9PVX4;E9PZ07;Q60736	G3X970;E9PVX4;E9PZ07;Q60736	20;19;19;19	20;19;19;19	20;19;19;19	Zona pellucida sperm-binding protein 3 receptor	Zp3r	tr|G3X970|G3X970_MOUSE Zona pellucida 3 receptor OS=Mus musculus OX=10090 GN=Zp3r PE=1 SV=1;tr|E9PVX4|E9PVX4_MOUSE Zona pellucida 3 receptor OS=Mus musculus OX=10090 GN=Zp3r PE=1 SV=1;tr|E9PZ07|E9PZ07_MOUSE Zona pellucida 3 receptor OS=Mus musculus OX=1009	4	20	20	20	4	4	4	14	14	13	17	19	14	4	4	4	14	14	13	17	19	14	4	4	4	14	14	13	17	19	14	26.9	26.9	26.9	64.98	579	579;514;535;579	0	72.741	7.8	7.8	7.8
G3X9Q0;Q9JKP5;A0A0A6YXE3;Q3U581	G3X9Q0;Q9JKP5;A0A0A6YXE3	8;8;7;3	1;1;1;1	1;1;1;1	Muscleblind-like protein 1	Mbnl1	tr|G3X9Q0|G3X9Q0_MOUSE Muscleblind like splicing factor 1 OS=Mus musculus OX=10090 GN=Mbnl1 PE=1 SV=1;sp|Q9JKP5|MBNL1_MOUSE Muscleblind-like protein 1 OS=Mus musculus OX=10090 GN=Mbnl1 PE=1 SV=1;tr|A0A0A6YXE3|A0A0A6YXE3_MOUSE Muscleblind like splicing fact	4	8	1	1	0	0	0	5	6	5	5	6	7	0	0	0	1	1	1	1	1	1	0	0	0	1	1	1	1	1	1	23.9	8.7	8.7	40.894	381	381;341;302;289	0	60.659	0	0	0
G5E8G0;G3X9W0;F6ZV59;E9Q5B6;F6SHF3;A0A0G2JFL4;F7A465	G5E8G0;G3X9W0;F6ZV59;E9Q5B6;F6SHF3	31;31;30;17;16;4;4	1;1;0;0;0;0;0	1;1;0;0;0;0;0		Hnrnpd	tr|G5E8G0|G5E8G0_MOUSE Heterogeneous nuclear ribonucleoprotein D OS=Mus musculus OX=10090 GN=Hnrnpd PE=1 SV=1;tr|G3X9W0|G3X9W0_MOUSE Heterogeneous nuclear ribonucleoprotein D OS=Mus musculus OX=10090 GN=Hnrnpd PE=1 SV=1;tr|F6ZV59|F6ZV59_MOUSE Heterogeneous	7	31	1	1	5	4	4	21	23	23	30	26	27	0	0	0	0	1	0	1	1	1	0	0	0	0	1	0	1	1	1	54.4	4.2	4.2	30.608	287	287;336;216;107;150;25;131	0	4.9323	14.6	13.6	13.6
G5E8G6;G3X9Y9;P21271;D3Z135;E9Q1F5;H3BLK6;A0A1L1SUF0	G5E8G6;G3X9Y9;P21271	33;33;33;3;2;1;1	33;33;33;3;2;1;1	31;31;31;2;0;1;0	Unconventional myosin-Vb	Myo5b	tr|G5E8G6|G5E8G6_MOUSE Myosin VB OS=Mus musculus OX=10090 GN=Myo5b PE=1 SV=1;tr|G3X9Y9|G3X9Y9_MOUSE Myosin VB OS=Mus musculus OX=10090 GN=Myo5b PE=1 SV=1;sp|P21271|MYO5B_MOUSE Unconventional myosin-Vb OS=Mus musculus OX=10090 GN=Myo5b PE=1 SV=2	7	33	33	31	20	22	20	4	2	4	7	4	5	20	22	20	4	2	4	7	4	5	19	21	18	3	1	3	6	3	4	21.6	21.6	20.3	210.54	1818	1818;1844;1818;183;1742;128;269	0	60.647	12.7	15	13.9
G3X9Z4;Q80V88	G3X9Z4	53;2	53;2	13;2		Pcf11	sp|G3X9Z4|PCF11_MOUSE Pre-mRNA cleavage complex 2 protein Pcf11 OS=Mus musculus OX=10090 GN=Pcf11 PE=2 SV=1	2	53	53	13	0	0	0	20	23	17	40	38	38	0	0	0	20	23	17	40	38	38	0	0	0	5	5	5	11	11	12	41.9	41.9	11	172.72	1553	1553;78	0	295.69	0	0	0
Q61371;G3X9Z7;F6QZ23	Q61371;G3X9Z7	7;7;1	7;7;1	7;7;1	Intraflagellar transport protein 88 homolog	Ift88	sp|Q61371|IFT88_MOUSE Intraflagellar transport protein 88 homolog OS=Mus musculus OX=10090 GN=Ift88 PE=1 SV=2;tr|G3X9Z7|G3X9Z7_MOUSE Intraflagellar transport 88 OS=Mus musculus OX=10090 GN=Ift88 PE=1 SV=1	3	7	7	7	0	0	0	1	1	0	4	4	6	0	0	0	1	1	0	4	4	6	0	0	0	1	1	0	4	4	6	11.9	11.9	11.9	92.993	824	824;825;175	0	16.168	0	0	0
G3XA12	G3XA12	2	2	2		4933406M09Rik	tr|G3XA12|G3XA12_MOUSE MGAT4 family, member F OS=Mus musculus OX=10090 GN=Mgat4f PE=1 SV=1	1	2	2	2	0	0	0	0	0	1	1	1	2	0	0	0	0	0	1	1	1	2	0	0	0	0	0	1	1	1	2	4.8	4.8	4.8	54.7	479	479	0	4.8671	0	0	0
G3XA57;G3UW57	G3XA57;G3UW57	7;6	6;5	6;5	Rab11 family-interacting protein 2	Rab11fip2	sp|G3XA57|RFIP2_MOUSE Rab11 family-interacting protein 2 OS=Mus musculus OX=10090 GN=Rab11fip2 PE=1 SV=1;tr|G3UW57|G3UW57_MOUSE RAB11 family interacting protein 2 (class I) OS=Mus musculus OX=10090 GN=Rab11fip2 PE=1 SV=1	2	7	6	6	0	0	0	4	4	4	5	5	5	0	0	0	3	3	3	4	4	4	0	0	0	3	3	3	4	4	4	20.1	17.8	17.8	58.206	512	512;370	0	15.39	0	0	0
G5E861	G5E861	1	1	1	Sodium channel and clathrin linker 1	Sclt1	sp|G5E861|SCLT1_MOUSE Sodium channel and clathrin linker 1 OS=Mus musculus OX=10090 GN=Sclt1 PE=1 SV=1	1	1	1	1	0	0	0	1	0	0	0	0	0	0	0	0	1	0	0	0	0	0	0	0	0	1	0	0	0	0	0	1.9	1.9	1.9	80.491	688	688	1	-2	0	0	0
Q99NB9;G5E866;A0A087WNS2	Q99NB9;G5E866	33;33;2	33;33;2	33;33;2	Splicing factor 3B subunit 1	Sf3b1	sp|Q99NB9|SF3B1_MOUSE Splicing factor 3B subunit 1 OS=Mus musculus OX=10090 GN=Sf3b1 PE=1 SV=1;tr|G5E866|G5E866_MOUSE Splicing factor 3b, subunit 1 OS=Mus musculus OX=10090 GN=Sf3b1 PE=1 SV=1	3	33	33	33	1	2	2	8	8	10	23	22	21	1	2	2	8	8	10	23	22	21	1	2	2	8	8	10	23	22	21	30.1	30.1	30.1	145.81	1304	1304;1304;144	0	135.02	0.8	1.8	1.7
G5E870;A0A087WNZ7;A0A087WRV6;A0A0B4J1N9;Q3TP48;A0A087WSG4;A0A087WS65	G5E870;A0A087WNZ7	53;52;25;23;5;4;2	53;52;25;23;5;4;2	47;46;25;17;0;3;0	E3 ubiquitin-protein ligase TRIP12	Trip12	sp|G5E870|TRIPC_MOUSE E3 ubiquitin-protein ligase TRIP12 OS=Mus musculus OX=10090 GN=Trip12 PE=1 SV=1;tr|A0A087WNZ7|A0A087WNZ7_MOUSE E3 ubiquitin-protein ligase OS=Mus musculus OX=10090 GN=Trip12 PE=1 SV=1	7	53	53	47	3	6	4	21	23	21	44	42	42	3	6	4	21	23	21	44	42	42	3	6	4	18	20	19	38	37	36	34.5	34.5	30.5	224.13	2025	2025;1992;830;982;146;213;65	0	323.31	2	3.9	2.9
[truncated: 1,699 more rows]
[truncated: 57 more columns]

## Sheet: TNP1
Protein names	Gene names	LFQ intensity NC_rep1	LFQ intensity NC_rep2	LFQ intensity NC_rep3	LFQ intensity TNP1_rep1	LFQ intensity TNP1_rep2	LFQ intensity TNP1_rep3	LFQ NC	LFQ TNP1	TNP1/NC
Nuclear cap-binding protein subunit 1	Ncbp1	0	0	0	2842900000	2697800000	2823200000	0	2.78797e+09	#DIV/0!
[truncated: 1,013 more rows]

## Sheet: SPEM1
Protein names	Gene names	LFQ intensity NC_rep1	LFQ intensity NC_rep2	LFQ intensity NC_rep3	LFQ intensity SPEM1_rep1	LFQ intensity SPEM1_rep2	LFQ intensity SPEM1_rep3	LFQ NC	LFQ SPEM1	SPEM1/NC
[truncated: 608 more rows]
