# Supplementary material for: Targeted mRNP-phagy licenses translational activation during cellular metamorphosis
Source: Research Square preprint supplement (doi:10.21203/rs.3.rs-6289188/v1), 2025-05-06
Supplement: Supplementary file 12 [file d22d3f75f979a8423b4b7162.xlsx]

## Sheet: >6
Protein names	Gene names	LFQ intensity hom_1	LFQ intensity hom_2	LFQ intensity hom_3	LFQ intensity WT_1	LFQ intensity WT_2	LFQ intensity WT_3	MS/MS count hom_1	MS/MS count hom_2	MS/MS count hom_3	MS/MS count WT_1	MS/MS count WT_2	MS/MS count WT_3	MS/MS count	MS Fold	MS WT SUM	MS HOM SUM	MS WT X
Cytosolic 5-nucleotidase 1B	Nt5c1b	0	0	0	2067500000	1636700000	1478000000	0	0	0	22	20	26	68	#DIV/0!	68	0	11440
G kinase-anchoring protein 1	Gkap1	0	0	0	0	55001000	87366000	0	0	0	1	4	8	13	#DIV/0!	13	0	32
Huntingtin-interacting protein 1	Hip1	0	0	0	0	67465000	58284000	0	0	0	2	3	5	10	#DIV/0!	10	0	30
Adenosylhomocysteinase	Ahcy	0	0	0	0	30691000	0	0	0	0	5	3	1	9	#DIV/0!	9	0	15
Zinc finger C2HC domain-containing protein 1A	Zc2hc1a	0	0	0	63070000	88307000	0	0	0	0	3	2	2	7	#DIV/0!	7	0	12
Hexokinase-1	Hk1	0	0	0	0	0	28067000	0	0	0	3	1	3	7	#DIV/0!	7	0	9
Leucine-rich repeat-containing protein 57	Lrrc57	0	0	0	0	0	5454100	0	0	0	2	2	2	6	#DIV/0!	6	0	8
Cyclin-G-associated kinase	Gak	0	0	0	0	0	53121000	0	0	0	2	1	4	7	#DIV/0!	7	0	8
Twinfilin-1	Twf1	0	0	0	0	64545000	52652000	0	0	0	1	2	3	6	#DIV/0!	6	0	6
Heat shock protein beta-9	Hspb9	0	0	0	0	20457000	0	0	0	0	1	2	1	4	#DIV/0!	4	0	2
Dynein light chain 4, axonemal	Dnal4	0	0	0	0	25828000	0	0	0	0	1	2	1	4	#DIV/0!	4	0	2
Sperm mitochondrial-associated cysteine-rich protein	Smcp	0	0	0	210980000	0	0	0	0	0	2	1	1	4	#DIV/0!	4	0	2
Four and a half LIM domains protein 5	Fhl5	0	0	0	0	0	8337400	0	0	0	1	1	1	3	#DIV/0!	3	0	1
Glyceraldehyde-3-phosphate dehydrogenase, testis-specific	Gapdhs	0	0	0	232730000	199530000	222560000	0	0	2	7	4	9	22	10	20	2	252
RNA-binding protein MEX3D	Mex3d	331310000	309050000	419420000	49170000000	37572000000	37417000000	10	9	9	79	70	71	248	7.85714	220	28	392630
Inactive peptidyl-prolyl cis-trans isomerase FKBP6	Fkbp6	0	0	0	0	0	19251000	0	0	1	3	1	3	8	7	7	1	9
AP2-associated protein kinase 1	Aak1	0	0	0	0	74358000	87463000	0	1	1	4	3	6	15	6.5	13	2	72
Polypeptide N-acetylgalactosaminyltransferase 3	Galnt3	0	0	0	103430000	0	0	0	2	0	9	1	2	14	6	12	2	18
TSC22 domain family protein 1	Tsc22d1	0	0	0	0	48236000	41684000	0	0	1	2	2	2	7	6	6	1	8
Scaffold attachment factor B1;Scaffold attachment factor B2	Safb;Safb2	0	0	0	0	0	15971000	1	0	0	3	1	2	7	6	6	1	6
