# Supplementary material for: Targeted mRNP-phagy licenses translational activation during cellular metamorphosis
Source: Research Square preprint supplement (doi:10.21203/rs.3.rs-6289188/v1), 2025-05-06
Supplement: Supplementary file 13 [file d337f242558209de0c0dc944.xlsx]

## Sheet: Sheet1
Table S13. List of oligo sequences
Oligo Name	Sequence (5' to 3')
sgRNA
Mex3d_F	GGTGCGCCCTCGATGGGCGTGGG
Mex3d_R	GGCCACCTCGAGCTCGTCGGGGG
Hip1_1	GAAAGGCTTCTTTACCCCCGGGG
Hip1_2	GATGTGGTCTACGTACAGAGTGG
Hip1_3	GTAGGCTACGGCCATGTGGGAGG
Genotyping
Mex3d_F	GAAGGGATGGCGACACGC
Mex3d_R	TCGGGGTCCAAAAGAGGC
Hip1-WT_F	ATGCCATCTTCATGGGGGTC
Hip1-WT_R	CGGCCACTTCCTGCGTATTA
Hip1-KO_F	ATGCCATCTTCATGGGGGTC
Hip1-KO_R	GGTCCTGCTCTTTTTAGGGGC
qPCR
Spem1_F	CAATTTGGTGACCCTGCTCTGG
Spem1_R	GACTTTGGGGTAGGTCTGCTT
Sf1_F	CAATTTGGTGACCCTGCTCTGG
Sf1_R	GACTTTGGGGTAGGTCTGCTT
18s_F	TAACGAACGAGACTCTGGCAT
18s_R	CGGACATCTAAGGGCATCACAG
siRNA
siMEX3D 1#
siMEX3D 2#
