# Supplementary material for: Targeted mRNP-phagy licenses translational activation during cellular metamorphosis
Source: Research Square preprint supplement (doi:10.21203/rs.3.rs-6289188/v1), 2025-05-06
Supplement: Supplementary file 14 [file fce750e3eb3ea666bae637a8.xlsx]

## Sheet: proteinGroups
Protein IDs	Majority protein IDs	Peptide counts (all)	Peptide counts (razor+unique)	Peptide counts (unique)	Protein names	Gene names	Fasta headers	Number of proteins	Peptides	Razor + unique peptides	Unique peptides	Peptides blank_rep1	Peptides blank_rep2	Peptides blank_rep3	Peptides MEX_rep1	Peptides MEX_rep2	Peptides MEX_rep3	Peptides RING_rep1	Peptides RING_rep2	Peptides RING_rep3	Razor + unique peptides blank_rep1	Razor + unique peptides blank_rep2	Razor + unique peptides blank_rep3	Razor + unique peptides MEX_rep1	Razor + unique peptides MEX_rep2	Razor + unique peptides MEX_rep3	Razor + unique peptides RING_rep1	Razor + unique peptides RING_rep2	Razor + unique peptides RING_rep3	Unique peptides blank_rep1	Unique peptides blank_rep2	Unique peptides blank_rep3	Unique peptides MEX_rep1	Unique peptides MEX_rep2	Unique peptides MEX_rep3	Unique peptides RING_rep1	Unique peptides RING_rep2	Unique peptides RING_rep3	Sequence coverage [%]	Unique + razor sequence coverage [%]	Unique sequence coverage [%]	Mol. weight [kDa]	Sequence length	Sequence lengths	Q-value	Score	Sequence coverage blank_rep1 [%]	Sequence coverage blank_rep2 [%]	Sequence coverage blank_rep3 [%]
P63261;I3L4N8;A0A804GS07;I3L3I0;I3L1U9;I3L3R2;J3KT65;K7EM38;A0A7P0TBL1	P63261;I3L4N8;A0A804GS07;I3L3I0;I3L1U9	34;33;29;19;19;14;14;13;2	34;33;29;19;19;14;14;13;2	1;1;1;1;1;1;1;1;1	Actin, cytoplasmic 2;Actin, cytoplasmic 2, N-terminally processed	ACTG1	sp|P63261|ACTG_HUMAN Actin, cytoplasmic 2 OS=Homo sapiens OX=9606 GN=ACTG1 PE=1 SV=1;tr|I3L4N8|I3L4N8_HUMAN Actin gamma 1 OS=Homo sapiens OX=9606 GN=ACTG1 PE=1 SV=9;tr|A0A804GS07|A0A804GS07_HUMAN Actin gamma 1 OS=Homo sapiens OX=9606 GN=ACTG1 PE=1 SV=1;tr|	9	34	34	1	32	29	30	17	20	20	23	24	24	32	29	30	17	20	20	23	24	24	1	1	1	1	1	1	1	1	1	82.9	82.9	4.5	41.792	375	375;351;366;214;214;164;198;133;59	0	323.31	81.6	68.5	69.6
P35579;A0A8I5KWT8;A0A8I5KYI1;Q5BKV1;A0A8I5KU92;B1AH99;REV__S4R3H4;REV__E7EQT4;REV__Q9UKV3	P35579;A0A8I5KWT8	170;169;14;14;14;6;1;1;1	170;169;14;14;14;6;1;1;1	140;139;12;12;12;5;1;1;1	Myosin-9	MYH9	sp|P35579|MYH9_HUMAN Myosin-9 OS=Homo sapiens OX=9606 GN=MYH9 PE=1 SV=4;tr|A0A8I5KWT8|A0A8I5KWT8_HUMAN Myosin heavy chain 9 OS=Homo sapiens OX=9606 GN=MYH9 PE=1 SV=1	9	170	170	140	153	150	153	90	95	95	125	128	125	153	150	153	90	95	95	125	128	125	127	126	126	74	76	78	103	106	104	64	64	53.5	226.53	1960	1960;1981;207;218;224;103;1283;1301;1341	0	323.31	59.7	59.7	61
P04279	P04279	40	35	35	Semenogelin-1;Alpha-inhibin-92;Alpha-inhibin-31;Seminal basic protein	SEMG1	sp|P04279|SEMG1_HUMAN Semenogelin-1 OS=Homo sapiens OX=9606 GN=SEMG1 PE=1 SV=2	1	40	35	35	35	36	35	33	33	29	27	27	27	30	31	30	28	28	24	22	22	22	30	31	30	28	28	24	22	22	22	72.1	67.7	67.7	52.13	462	462	0	323.31	72.1	71.9	70.8
Q02383	Q02383	46	46	41	Semenogelin-2	SEMG2	sp|Q02383|SEMG2_HUMAN Semenogelin-2 OS=Homo sapiens OX=9606 GN=SEMG2 PE=1 SV=1	1	46	46	41	39	39	36	37	38	39	34	30	29	39	39	36	37	38	39	34	30	29	34	34	31	32	33	34	29	25	24	71.5	71.5	65.5	65.444	582	582	0	323.31	63.4	66	57.9
P08670;B0YJC4;B0YJC5;A0A1B0GTT5;A0A1B0GVG8;P17661;H7C5W5;P41219;A0A1X7SBR3;A0A1W2PR46;P14136;F8W835;A0A1W2PRT3	P08670;B0YJC4	54;50;22;16;8;6;3;3;2;2;2;1;1	54;50;22;16;8;6;3;3;2;2;2;1;1	49;45;18;15;8;2;1;1;1;1;1;1;1	Vimentin	VIM	sp|P08670|VIME_HUMAN Vimentin OS=Homo sapiens OX=9606 GN=VIM PE=1 SV=4;tr|B0YJC4|B0YJC4_HUMAN Vimentin OS=Homo sapiens OX=9606 GN=VIM PE=1 SV=1	13	54	54	49	45	47	46	20	24	23	33	36	37	45	47	46	20	24	23	33	36	37	41	42	41	19	22	22	31	32	33	71.9	71.9	65.9	53.651	466	466;431;228;149;109;470;200;470;472;505;432;207;326	0	323.31	67	69.3	65
P35580;A0A8I5KZ38;A0A8I5KSC2;A0A8I5KTT7;A0A6E1W127;P12883;P13535;Q9UKX3;Q9Y623;P13533;P12882;P11055;A7E2Y1	P35580;A0A8I5KZ38	151;149;12;12;1;1;1;1;1;1;1;1;1	132;130;11;11;0;0;0;0;0;0;0;0;0	121;119;11;11;0;0;0;0;0;0;0;0;0	Myosin-10	MYH10	sp|P35580|MYH10_HUMAN Myosin-10 OS=Homo sapiens OX=9606 GN=MYH10 PE=1 SV=3;tr|A0A8I5KZ38|A0A8I5KZ38_HUMAN Myosin heavy chain 10 OS=Homo sapiens OX=9606 GN=MYH10 PE=1 SV=1	13	151	132	121	118	117	120	52	57	47	97	100	96	102	102	104	42	44	36	82	86	83	93	92	95	41	41	32	76	79	74	60.6	53.3	49.9	229	1976	1976;1986;199;207;1941;1935;1937;1938;1939;1939;1939;1940;1983	0	323.31	49.9	50.6	51.1
P68133;P68032;P63267;P62736;A6NL76;F8WB63;B8ZZJ2;C9JFL5;F6UVQ4;F6QUT6	P68133;P68032;P63267;P62736;A6NL76	21;21;20;20;18;10;10;10;10;10	1;1;1;1;1;1;1;1;1;1	0;0;0;0;0;0;0;0;0;0	Actin, alpha skeletal muscle;Actin, alpha cardiac muscle 1;Actin, gamma-enteric smooth muscle;Actin, aortic smooth muscle	ACTA1;ACTC1;ACTG2;ACTA2	sp|P68133|ACTS_HUMAN Actin, alpha skeletal muscle OS=Homo sapiens OX=9606 GN=ACTA1 PE=1 SV=1;sp|P68032|ACTC_HUMAN Actin, alpha cardiac muscle 1 OS=Homo sapiens OX=9606 GN=ACTC1 PE=1 SV=1;sp|P63267|ACTH_HUMAN Actin, gamma-enteric smooth muscle OS=Homo sapie	10	21	1	0	19	20	20	11	15	12	14	15	15	1	1	1	1	1	1	1	1	1	0	0	0	0	0	0	0	0	0	37.1	4.2	0	42.051	377	377;377;376;377;351;105;119;144;151;151	0	45.859	34.7	37.1	35.5
Q86XN8;S4R446;Q6ZN04;A0A6Q8PG18;A1L020;Q5U5Q3	Q86XN8;S4R446	13;12;2;1;1;1	13;12;2;1;1;1	13;12;2;1;1;1	RNA-binding protein MEX3D	MEX3D	sp|Q86XN8|MEX3D_HUMAN RNA-binding protein MEX3D OS=Homo sapiens OX=9606 GN=MEX3D PE=1 SV=3;tr|S4R446|S4R446_HUMAN Mex-3 RNA binding family member D (Fragment) OS=Homo sapiens OX=9606 GN=MEX3D PE=1 SV=1	6	13	13	13	0	0	0	11	11	9	9	10	10	0	0	0	11	11	9	9	10	10	0	0	0	11	11	9	9	10	10	16.4	16.4	16.4	64.882	651	651;490;569;216;520;659	0	151.51	0	0	0
Q01082;A0A087WUZ3;F8W6C1;P11277	Q01082;A0A087WUZ3	131;128;37;6	131;128;37;6	119;116;26;2	Spectrin beta chain, non-erythrocytic 1	SPTBN1	sp|Q01082|SPTB2_HUMAN Spectrin beta chain, non-erythrocytic 1 OS=Homo sapiens OX=9606 GN=SPTBN1 PE=1 SV=2;tr|A0A087WUZ3|A0A087WUZ3_HUMAN Spectrin beta chain OS=Homo sapiens OX=9606 GN=SPTBN1 PE=1 SV=1	4	131	131	119	95	97	101	35	44	39	71	76	81	95	97	101	35	44	39	71	76	81	89	88	92	33	41	37	67	72	77	53.6	53.6	49.2	274.61	2364	2364;2366;690;2137	0	323.31	41.5	41.6	43.9
Q13813;A0A0D9SFF6;A0A0D9SGF6;A0A994J6W3;A0A994J498	Q13813;A0A0D9SFF6;A0A0D9SGF6;A0A994J6W3;A0A994J498	145;144;144;144;89	145;144;144;144;89	3;2;2;2;2	Spectrin alpha chain, non-erythrocytic 1	SPTAN1	sp|Q13813|SPTN1_HUMAN Spectrin alpha chain, non-erythrocytic 1 OS=Homo sapiens OX=9606 GN=SPTAN1 PE=1 SV=3;tr|A0A0D9SFF6|A0A0D9SFF6_HUMAN Spectrin alpha, non-erythrocytic 1 OS=Homo sapiens OX=9606 GN=SPTAN1 PE=1 SV=2;tr|A0A0D9SGF6|A0A0D9SGF6_HUMAN Spectrin	5	145	145	3	115	94	113	35	45	33	68	74	74	115	94	113	35	45	33	68	74	74	2	2	3	0	0	1	1	3	2	52.5	52.5	1.4	284.54	2472	2472;2489;2498;2506;1679	0	323.31	45.1	38	44.9
Q7Z406	Q7Z406	111	96	63	Myosin-14	MYH14	sp|Q7Z406|MYH14_HUMAN Myosin-14 OS=Homo sapiens OX=9606 GN=MYH14 PE=1 SV=2	1	111	96	63	90	85	93	29	33	32	66	65	68	77	71	79	24	26	26	56	54	56	49	43	49	15	16	15	38	36	38	50.3	44.6	27	227.87	1995	1995	0	323.31	44	41	44.4
Q16643;D6R9W4;D6R9Q9;D6RFI1;D6RCR4	Q16643;D6R9W4	35;27;9;7;5	35;27;9;7;5	35;27;9;7;5	Drebrin	DBN1	sp|Q16643|DREB_HUMAN Drebrin OS=Homo sapiens OX=9606 GN=DBN1 PE=1 SV=4;tr|D6R9W4|D6R9W4_HUMAN Drebrin 1 (Fragment) OS=Homo sapiens OX=9606 GN=DBN1 PE=1 SV=1	5	35	35	35	29	30	25	11	14	13	20	23	23	29	30	25	11	14	13	20	23	23	29	30	25	11	14	13	20	23	23	51.3	51.3	51.3	71.428	649	649;317;391;124;93	0	323.31	44.1	42.8	42.2
A0A494C071	A0A494C071	3	3	3			sp|A0A494C071|PWWP4_HUMAN PWWP domain-containing DNA repair factor 4 OS=Homo sapiens OX=9606 GN=PWWP4 PE=3 SV=1	1	3	3	3	0	1	0	1	1	1	2	1	1	0	1	0	1	1	1	2	1	1	0	1	0	1	1	1	2	1	1	2.4	2.4	2.4	217.77	2061	2061	0	4.5129	0	0.7	0
Q07666;A0A6Q8PGH5;Q5VWX1	Q07666	9;2;2	9;2;2	8;1;1	KH domain-containing, RNA-binding, signal transduction-associated protein 1	KHDRBS1	sp|Q07666|KHDR1_HUMAN KH domain-containing, RNA-binding, signal transduction-associated protein 1 OS=Homo sapiens OX=9606 GN=KHDRBS1 PE=1 SV=1	3	9	9	8	7	7	8	7	9	7	6	5	7	7	7	8	7	9	7	6	5	7	7	7	8	7	8	6	6	5	6	23	23	21	48.227	443	443;305;349	0	155.41	21	21	21
P02751;H0Y7Z1;H0Y4K8	P02751;H0Y7Z1	36;18;3	36;18;3	36;18;3	Fibronectin;Anastellin;Ugl-Y1;Ugl-Y2;Ugl-Y3	FN1	sp|P02751|FINC_HUMAN Fibronectin OS=Homo sapiens OX=9606 GN=FN1 PE=1 SV=5;tr|H0Y7Z1|H0Y7Z1_HUMAN Fibronectin (Fragment) OS=Homo sapiens OX=9606 GN=FN1 PE=1 SV=1	3	36	36	36	24	27	25	23	24	22	28	23	27	24	27	25	23	24	22	28	23	27	24	27	25	23	24	22	28	23	27	17.6	17.6	17.6	272.32	2477	2477;1103;241	0	323.31	13	13.8	12.8
E9PMV1;A0A8I5KUE3;A0A8I5KYZ1;Q15149;A0A8I5KSD5;H0YDN1;A0A075B730;P58107;A0A5F9ZGX0;A0A7P0MQR8;H3BPE1;H3BQK9;Q9UPN3	E9PMV1;A0A8I5KUE3;A0A8I5KYZ1;Q15149;A0A8I5KSD5;H0YDN1	194;193;193;193;192;142;5;5;1;1;1;1;1	194;193;193;193;192;142;5;5;1;1;1;1;1	194;193;193;193;192;142;5;5;1;1;1;1;1	Plectin	PLEC	tr|E9PMV1|E9PMV1_HUMAN Plectin OS=Homo sapiens OX=9606 GN=PLEC PE=1 SV=2;tr|A0A8I5KUE3|A0A8I5KUE3_HUMAN Plectin OS=Homo sapiens OX=9606 GN=PLEC PE=1 SV=1;tr|A0A8I5KYZ1|A0A8I5KYZ1_HUMAN Plectin OS=Homo sapiens OX=9606 GN=PLEC PE=1 SV=1;sp|Q15149|PLEC_HUMAN	13	194	194	194	143	123	134	13	21	13	76	94	84	143	123	134	13	21	13	76	94	84	143	123	134	13	21	13	76	94	84	41.9	41.9	41.9	520.59	4591	4591;4524;4564;4684;4453;3447;5063;5088;2146;7385;7555;7592;7388	0	323.31	32.8	29.8	31.5
Q562R1	Q562R1	10	1	1	Beta-actin-like protein 2	ACTBL2	sp|Q562R1|ACTBL_HUMAN Beta-actin-like protein 2 OS=Homo sapiens OX=9606 GN=ACTBL2 PE=1 SV=2	1	10	1	1	9	9	9	3	6	5	7	8	7	0	0	0	0	0	1	0	1	0	0	0	0	0	0	1	0	1	0	20.7	4.8	4.8	42.003	376	376	0.0022371	2.4017	16	16	16
Q9UHB6;F8VQE1;F8VRN8;F8VS07;F8VTU2;F8VVQ7	Q9UHB6;F8VQE1;F8VRN8	45;30;28;21;12;9	45;30;28;21;12;9	45;30;28;21;12;9	LIM domain and actin-binding protein 1	LIMA1	sp|Q9UHB6|LIMA1_HUMAN LIM domain and actin-binding protein 1 OS=Homo sapiens OX=9606 GN=LIMA1 PE=1 SV=1;tr|F8VQE1|F8VQE1_HUMAN LIM domain and actin binding 1 OS=Homo sapiens OX=9606 GN=LIMA1 PE=1 SV=1;tr|F8VRN8|F8VRN8_HUMAN LIM domain and actin binding 1 O	6	45	45	45	38	32	31	15	11	9	23	25	23	38	32	31	15	11	9	23	25	23	38	32	31	15	11	9	23	25	23	56.1	56.1	56.1	85.225	759	759;598;388;456;130;111	0	323.31	51.4	46.2	47.6
Q00610;A0A8V8TQ14;K7EJJ5;A0A087WVQ6;A0A8V8TR47;A0A8V8TRF0;A0A8V8TQK1;A0A8V8TRE8;A0A8V8TQK3;A0A8V8TQ18;J3KRF5;J3KS13;P53675;A0A087WX41;A0A8V8TQK7;J3QL20;A0A087WXH4;A0A087WV74;F5H5N6	Q00610;A0A8V8TQ14;K7EJJ5;A0A087WVQ6;A0A8V8TR47;A0A8V8TRF0;A0A8V8TQK1;A0A8V8TRE8;A0A8V8TQK3;A0A8V8TQ18	55;55;55;55;55;55;54;52;51;44;20;17;13;12;4;3;1;1;1	55;55;55;55;55;55;54;52;51;44;20;17;13;12;4;3;1;1;1	55;55;55;55;55;55;54;52;51;44;20;17;13;12;4;3;1;1;1	Clathrin heavy chain 1;Clathrin heavy chain	CLTC	sp|Q00610|CLH1_HUMAN Clathrin heavy chain 1 OS=Homo sapiens OX=9606 GN=CLTC PE=1 SV=5;tr|A0A8V8TQ14|A0A8V8TQ14_HUMAN Clathrin heavy chain OS=Homo sapiens OX=9606 GN=CLTC PE=1 SV=1;tr|K7EJJ5|K7EJJ5_HUMAN Clathrin heavy chain OS=Homo sapiens OX=9606 GN=CLTC	19	55	55	55	39	44	49	9	13	9	27	29	26	39	44	49	9	13	9	27	29	26	39	44	49	9	13	9	27	29	26	34.9	34.9	34.9	191.61	1675	1675;1680;1682;1679;1679;1676;1651;1617;1579;1516;746;612;1640;1260;157;97;463;369;169	0	323.31	25.7	27.2	32.7
M0R1F0;P07288;A0A0B4J1X3;M0QX57;M0R1Z7;M0QZF9;M0R294	M0R1F0;P07288;A0A0B4J1X3;M0QX57;M0R1Z7;M0QZF9;M0R294	6;6;3;3;3;3;3	6;6;3;3;3;3;3	5;5;2;2;3;3;2	Prostate-specific antigen	KLK3	tr|M0R1F0|M0R1F0_HUMAN Kallikrein related peptidase 3 (Fragment) OS=Homo sapiens OX=9606 GN=KLK3 PE=1 SV=1;sp|P07288|KLK3_HUMAN Prostate-specific antigen OS=Homo sapiens OX=9606 GN=KLK3 PE=1 SV=2;tr|A0A0B4J1X3|A0A0B4J1X3_HUMAN Kallikrein 3, (Prostate speci	7	6	6	5	4	4	5	4	5	4	3	1	2	4	4	5	4	5	4	3	1	2	4	4	4	4	4	4	3	1	1	25.2	25.2	21.8	28.552	262	262;261;90;124;172;172;195	0	281.21	19.1	19.1	22.5
E7EQB2;E7ER44;P02788;C9JCF5;CON__Q29443;CON__Q0IIK2	E7EQB2;E7ER44;P02788	29;29;29;5;1;1	29;29;29;5;1;1	29;29;29;5;1;1	Lactotransferrin;Lactoferricin-H;Kaliocin-1;Lactoferroxin-A;Lactoferroxin-B;Lactoferroxin-C	LTF	tr|E7EQB2|E7EQB2_HUMAN Lactotransferrin (Fragment) OS=Homo sapiens OX=9606 GN=LTF PE=1 SV=1;tr|E7ER44|E7ER44_HUMAN Lactotransferrin OS=Homo sapiens OX=9606 GN=LTF PE=1 SV=1;sp|P02788|TRFL_HUMAN Lactotransferrin OS=Homo sapiens OX=9606 GN=LTF PE=1 SV=6	6	29	29	29	19	21	20	21	20	16	18	19	18	19	21	20	21	20	16	18	19	18	19	21	20	21	20	16	18	19	18	46.1	46.1	46.1	76.625	696	696;708;710;182;685;704	0	323.31	26.6	30.5	26.6
A0A0A0MRM8;A0A1Y0BRN3;A0A590UJ40;Q9UM54;A0A0D9SGC1;A0A590UKB0;A0A590UJ75;A0A590UK22;A0A590UK86;A0A5F9ZI03;A0A590UJY4;A0A590UK71;Q5JVM0;A0A590UJW9	A0A0A0MRM8;A0A1Y0BRN3;A0A590UJ40;Q9UM54;A0A0D9SGC1;A0A590UKB0;A0A590UJ75;A0A590UK22	61;60;59;59;47;45;45;42;30;28;28;27;5;3	61;60;59;59;47;45;45;42;30;28;28;27;5;3	61;60;59;59;47;45;45;42;30;28;28;27;5;3	Unconventional myosin-VI	MYO6	tr|A0A0A0MRM8|A0A0A0MRM8_HUMAN Unconventional myosin-VI OS=Homo sapiens OX=9606 GN=MYO6 PE=1 SV=1;tr|A0A1Y0BRN3|A0A1Y0BRN3_HUMAN Unconventional myosin-VI OS=Homo sapiens OX=9606 GN=MYO6 PE=1 SV=1;tr|A0A590UJ40|A0A590UJ40_HUMAN Unconventional myosin-VI OS=H	14	61	61	61	47	42	49	12	12	5	26	26	29	47	42	49	12	12	5	26	26	29	47	42	49	12	12	5	26	26	29	46.1	46.1	46.1	145.01	1253	1253;1285;1294;1294;962;924;926;878;690;661;664;634;174;194	0	323.31	35.9	30.6	36.7
P15309;E9PFE6	P15309;E9PFE6	15;8	15;8	15;8	Prostatic acid phosphatase;PAPf39	ACPP	sp|P15309|PPAP_HUMAN Prostatic acid phosphatase OS=Homo sapiens OX=9606 GN=ACP3 PE=1 SV=3;tr|E9PFE6|E9PFE6_HUMAN Acid phosphatase 3 (Fragment) OS=Homo sapiens OX=9606 GN=ACP3 PE=1 SV=1	2	15	15	15	11	12	12	8	8	7	7	7	6	11	12	12	8	8	7	7	7	6	11	12	12	8	8	7	7	7	6	29.8	29.8	29.8	44.566	386	386;165	0	115.37	19.9	21.8	28
P62805	P62805	12	12	12	Histone H4	HIST1H4A	sp|P62805|H4_HUMAN Histone H4 OS=Homo sapiens OX=9606 GN=H4C1 PE=1 SV=2	1	12	12	12	8	8	9	4	5	6	8	9	7	8	8	9	4	5	6	8	9	7	8	8	9	4	5	6	8	9	7	65	65	65	11.367	103	103	0	137.22	53.4	47.6	56.3
U3KQK0;Q99880;Q99879;Q99877;Q93079;Q5QNW6;P62807;P58876;P57053;O60814;Q96A08;A0A2R8Y619	U3KQK0;Q99880;Q99879;Q99877;Q93079;Q5QNW6;P62807;P58876;P57053;O60814;Q96A08	6;6;6;6;6;6;6;6;6;6;3;1	6;6;6;6;6;6;6;6;6;6;3;1	2;2;2;2;2;2;2;2;2;2;0;0	Histone H2B;Histone H2B type 1-L;Histone H2B type 1-M;Histone H2B type 1-N;Histone H2B type 1-H;Histone H2B type 2-F;Histone H2B type 1-C/E/F/G/I;Histone H2B type 1-D;Histone H2B type F-S;Histone H2B type 1-K;Histone H2B type 1-A	HIST1H2BN;HIST1H2BL;HIST1H2BM;HIST1H2BH;HIST2H2BF;HIST1H2BC;HIST1H2BD;H2BFS;HIST1H2BK;HIST1H2BA	tr|U3KQK0|U3KQK0_HUMAN Histone H2B OS=Homo sapiens OX=9606 GN=H2BC15 PE=1 SV=1;sp|Q99880|H2B1L_HUMAN Histone H2B type 1-L OS=Homo sapiens OX=9606 GN=H2BC13 PE=1 SV=3;sp|Q99879|H2B1M_HUMAN Histone H2B type 1-M OS=Homo sapiens OX=9606 GN=H2BC14 PE=1 SV=3;sp|	12	6	6	2	6	5	5	3	2	2	4	5	4	6	5	5	3	2	2	4	5	4	2	2	2	0	0	0	1	2	1	31.3	31.3	6	18.804	166	166;126;126;126;126;126;126;126;126;126;127;122	0	63.001	31.3	25.9	25.9
O00159;F5H6E2;I3L501	O00159;F5H6E2	39;39;5	39;39;5	35;35;1	Unconventional myosin-Ic	MYO1C	sp|O00159|MYO1C_HUMAN Unconventional myosin-Ic OS=Homo sapiens OX=9606 GN=MYO1C PE=1 SV=4;tr|F5H6E2|F5H6E2_HUMAN Myosin IC OS=Homo sapiens OX=9606 GN=MYO1C PE=1 SV=1	3	39	39	35	28	28	33	6	9	7	18	17	25	28	28	33	6	9	7	18	17	25	25	27	30	5	9	6	16	14	21	36	36	31.9	121.68	1063	1063;1039;168	0	323.31	26.2	28.3	32.4
Q4VCS5;E7ERM3;A6NP16	Q4VCS5;E7ERM3;A6NP16	46;37;36	46;37;36	42;33;32	Angiomotin	AMOT	sp|Q4VCS5|AMOT_HUMAN Angiomotin OS=Homo sapiens OX=9606 GN=AMOT PE=1 SV=1;tr|E7ERM3|E7ERM3_HUMAN Angiomotin OS=Homo sapiens OX=9606 GN=AMOT PE=1 SV=1;tr|A6NP16|A6NP16_HUMAN Angiomotin OS=Homo sapiens OX=9606 GN=AMOT PE=1 SV=1	3	46	46	42	39	36	36	6	8	4	23	24	25	39	36	36	6	8	4	23	24	25	36	34	32	6	8	4	22	24	25	41	41	38	118.08	1084	1084;852;597	0	323.31	33.5	35.3	34.3
E9PDF6;O43795;H7C2Y7;E7EQD9;A0A0U1RRI3;C9JYW1;Q9UBC5;C9JUP5;C9K0I9;G3V342	E9PDF6;O43795	34;34;9;6;4;3;3;2;1;1	34;34;9;6;4;3;3;2;1;1	34;34;9;6;4;3;3;2;1;1	Unconventional myosin-Ib	MYO1B	tr|E9PDF6|E9PDF6_HUMAN Myosin IB OS=Homo sapiens OX=9606 GN=MYO1B PE=1 SV=1;sp|O43795|MYO1B_HUMAN Unconventional myosin-Ib OS=Homo sapiens OX=9606 GN=MYO1B PE=1 SV=3	10	34	34	34	28	23	29	6	7	2	15	17	17	28	23	29	6	7	2	15	17	17	28	23	29	6	7	2	15	17	17	31.8	31.8	31.8	128.48	1107	1107;1136;192;303;189;163;1043;149;83;688	0	274.8	26.9	21.4	27.8
B1AK88;P47756;B1AK87;B1AK85;A0A6I8PRV6;A0A6I8PIN8	B1AK88;P47756;B1AK87;B1AK85	20;20;15;11;6;1	20;20;15;11;6;1	20;20;15;11;6;1	F-actin-capping protein subunit beta	CAPZB	tr|B1AK88|B1AK88_HUMAN F-actin-capping protein subunit beta OS=Homo sapiens OX=9606 GN=CAPZB PE=1 SV=1;sp|P47756|CAPZB_HUMAN F-actin-capping protein subunit beta OS=Homo sapiens OX=9606 GN=CAPZB PE=1 SV=5;tr|B1AK87|B1AK87_HUMAN F-actin-capping protein subu	6	20	20	20	18	16	17	4	6	4	8	11	8	18	16	17	4	6	4	8	11	8	18	16	17	4	6	4	8	11	8	54.8	54.8	54.8	33.781	301	301;272;244;260;59;63	0	323.31	52.2	45.5	45.5
F8W1R7;J3KND3;G8JLA2;G3V1V0;B7Z6Z4;P60660;F8VPF3;G3V1Y7;F8VZU9;F8W180;H0YI43;F8W1I5;F8VXL3;A0A8Q3SI90	F8W1R7;J3KND3;G8JLA2;G3V1V0;B7Z6Z4;P60660;F8VPF3;G3V1Y7;F8VZU9;F8W180	6;6;6;6;6;6;5;4;3;3;2;2;1;1	6;6;6;6;6;6;5;4;3;3;2;2;1;1	4;4;4;4;4;4;3;4;3;3;2;0;1;0	Myosin light polypeptide 6	MYL6	tr|F8W1R7|F8W1R7_HUMAN Myosin light chain 6 OS=Homo sapiens OX=9606 GN=MYL6 PE=1 SV=1;tr|J3KND3|J3KND3_HUMAN Myosin light chain 6 OS=Homo sapiens OX=9606 GN=MYL6 PE=1 SV=1;tr|G8JLA2|G8JLA2_HUMAN Myosin light chain 6 OS=Homo sapiens OX=9606 GN=MYL6 PE=1 SV=	14	6	6	4	6	6	6	4	4	4	4	6	6	6	6	6	4	4	4	4	6	6	4	4	4	2	3	2	3	4	4	38.6	38.6	22.1	16.29	145	145;152;152;161;238;151;130;115;103;196;83;175;47;105	0	103.42	38.6	38.6	38.6
Q16777;P20671;A0A0U1RR32;A0A0U1RRH7;Q99878;Q9BTM1;Q96KK5;P0C0S8;Q6FI13;H0YFX9;Q96QV6;A0A3B3IS11;P16104;Q71UI9;P0C0S5;C9J0D1;A0A494C189;Q8IUE6;C9J386	Q16777;P20671;A0A0U1RR32;A0A0U1RRH7;Q99878;Q9BTM1;Q96KK5;P0C0S8;Q6FI13;H0YFX9;Q96QV6;A0A3B3IS11;P16104	6;6;6;6;6;6;6;6;6;5;3;3;3;2;2;2;2;1;1	6;6;6;6;6;6;6;6;6;5;3;3;3;2;2;2;2;1;1	2;2;2;2;2;2;2;2;2;2;0;0;0;0;0;0;0;0;0	Histone H2A type 2-C;Histone H2A type 1-D;Histone H2A type 1-J;Histone H2A.J;Histone H2A type 1-H;Histone H2A type 1;Histone H2A type 2-A;Histone H2A;Histone H2A type 1-A;Histone H2AX	HIST2H2AC;HIST1H2AD;HIST1H2AJ;H2AFJ;HIST1H2AH;HIST1H2AG;HIST2H2AA3;HIST1H2AA;H2AFX	sp|Q16777|H2A2C_HUMAN Histone H2A type 2-C OS=Homo sapiens OX=9606 GN=H2AC20 PE=1 SV=4;sp|P20671|H2A1D_HUMAN Histone H2A type 1-D OS=Homo sapiens OX=9606 GN=H2AC7 PE=1 SV=2;tr|A0A0U1RR32|A0A0U1RR32_HUMAN Histone H2A OS=Homo sapiens OX=9606 GN=hCG_2039566 P	19	6	6	2	6	5	6	2	2	3	2	4	3	6	5	6	2	2	3	2	4	3	2	2	2	0	0	0	0	1	1	35.7	35.7	14	13.988	129	129;130;169;170;128;129;128;130;130;92;131;140;143;128;128;122;127;130;76	0	47.672	35.7	20.9	35.7
P52907	P52907	13	13	11	F-actin-capping protein subunit alpha-1	CAPZA1	sp|P52907|CAZA1_HUMAN F-actin-capping protein subunit alpha-1 OS=Homo sapiens OX=9606 GN=CAPZA1 PE=1 SV=3	1	13	13	11	12	9	10	3	3	3	7	6	8	12	9	10	3	3	3	7	6	8	10	7	8	2	2	2	6	5	7	54.5	54.5	48.6	32.922	286	286	0	195.5	49.3	38.8	45.1
P16403;P10412;P16402;P22492;Q02539	P16403;P10412;P16402	11;8;8;3;3	11;8;8;3;3	11;8;8;3;3	Histone H1.2;Histone H1.4;Histone H1.3	HIST1H1C;HIST1H1E;HIST1H1D	sp|P16403|H12_HUMAN Histone H1.2 OS=Homo sapiens OX=9606 GN=H1-2 PE=1 SV=2;sp|P10412|H14_HUMAN Histone H1.4 OS=Homo sapiens OX=9606 GN=H1-4 PE=1 SV=2;sp|P16402|H13_HUMAN Histone H1.3 OS=Homo sapiens OX=9606 GN=H1-3 PE=1 SV=2	5	11	11	11	8	6	7	3	4	3	8	8	8	8	6	7	3	4	3	8	8	8	8	6	7	3	4	3	8	8	8	28.6	28.6	28.6	21.364	213	213;219;221;207;215	0	82.389	28.2	25.4	27.2
P01859;P01861;P01860	P01859;P01861;P01860	3;2;2	3;2;2	2;1;1	Ig gamma-2 chain C region;Ig gamma-4 chain C region;Ig gamma-3 chain C region	IGHG2;IGHG4;IGHG3	sp|P01859|IGHG2_HUMAN Immunoglobulin heavy constant gamma 2 OS=Homo sapiens OX=9606 GN=IGHG2 PE=1 SV=3;sp|P01861|IGHG4_HUMAN Immunoglobulin heavy constant gamma 4 OS=Homo sapiens OX=9606 GN=IGHG4 PE=1 SV=2;sp|P01860|IGHG3_HUMAN Immunoglobulin heavy constan	3	3	3	2	2	3	3	1	1	1	2	3	2	2	3	3	1	1	1	2	3	2	1	2	2	1	0	0	1	2	1	13.2	13.2	11.4	43.805	395	395;396;446	0	66.795	4.8	13.2	13.2
P10909;H0YLK8;E7ERK6;E7ETB4;H0YC35;E5RG36;E5RGB0;E5RH61;E5RJZ5;H0YAS8	P10909;H0YLK8;E7ERK6;E7ETB4;H0YC35	16;11;9;8;8;6;6;6;6;4	16;11;9;8;8;6;6;6;6;4	16;11;9;8;8;6;6;6;6;4	Clusterin;Clusterin beta chain;Clusterin alpha chain;Clusterin	CLU	sp|P10909|CLUS_HUMAN Clusterin OS=Homo sapiens OX=9606 GN=CLU PE=1 SV=1;tr|H0YLK8|H0YLK8_HUMAN Clusterin (Fragment) OS=Homo sapiens OX=9606 GN=CLU PE=1 SV=1;tr|E7ERK6|E7ERK6_HUMAN Clusterin (Fragment) OS=Homo sapiens OX=9606 GN=CLU PE=1 SV=1;tr|E7ETB4|E7ET	10	16	16	16	13	13	14	7	10	8	9	10	7	13	13	14	7	10	8	9	10	7	13	13	14	7	10	8	9	10	7	32.3	32.3	32.3	52.494	449	449;297;204;271;284;82;129;135;139;140	0	126.88	28.7	26.9	26.7
A0A0G2JIW1;P0DMV9;P0DMV8;V9GZ37	A0A0G2JIW1;P0DMV9;P0DMV8;V9GZ37	24;24;24;15	24;24;24;15	14;14;14;8	Heat shock 70 kDa protein 1B;Heat shock 70 kDa protein 1A	HSPA1B;HSPA1A	tr|A0A0G2JIW1|A0A0G2JIW1_HUMAN Heat shock 70 kDa protein 1B OS=Homo sapiens OX=9606 GN=HSPA1B PE=1 SV=1;sp|P0DMV9|HS71B_HUMAN Heat shock 70 kDa protein 1B OS=Homo sapiens OX=9606 GN=HSPA1B PE=1 SV=1;sp|P0DMV8|HS71A_HUMAN Heat shock 70 kDa protein 1A OS=Hom	4	24	24	14	17	12	18	10	13	12	15	15	16	17	12	18	10	13	12	15	15	16	9	9	10	6	6	7	9	7	8	33.8	33.8	17.6	70.108	642	642;641;641;476	0	116.04	27.4	20.4	26.8
Q6WCQ1	Q6WCQ1	47	47	0	Myosin phosphatase Rho-interacting protein	MPRIP	sp|Q6WCQ1|MPRIP_HUMAN Myosin phosphatase Rho-interacting protein OS=Homo sapiens OX=9606 GN=MPRIP PE=1 SV=3	1	47	47	0	30	32	38	3	5	3	25	21	20	30	32	38	3	5	3	25	21	20	0	0	0	0	0	0	0	0	0	52.3	52.3	0	116.53	1025	1025	0	323.31	38	38.6	42.6
A0A087WWU8;D6R904;A0A494C0P6;A0A494C0G0;H0YL80;H0YKP3;Q5VU61	A0A087WWU8;D6R904;A0A494C0P6	26;17;15;11;7;7;6	26;17;15;11;7;7;6	10;10;0;4;0;0;6		TPM3	tr|A0A087WWU8|A0A087WWU8_HUMAN Tropomyosin 3 OS=Homo sapiens OX=9606 GN=TPM3 PE=1 SV=1;tr|D6R904|D6R904_HUMAN Tropomyosin 3 OS=Homo sapiens OX=9606 GN=TPM3 PE=1 SV=1;tr|A0A494C0P6|A0A494C0P6_HUMAN Tropomyosin 3 OS=Homo sapiens OX=9606 GN=TPM3 PE=1 SV=1	7	26	26	10	22	22	20	4	4	4	11	15	13	22	22	20	4	4	4	11	15	13	9	9	8	1	1	1	3	7	6	69.2	69.2	19.4	26.42	227	227;95;214;87;68;157;49	0	128.44	65.2	65.2	63.9
P05141;Q9H0C2	P05141	10;3	10;3	4;0	ADP/ATP translocase 2;ADP/ATP translocase 2, N-terminally processed	SLC25A5	sp|P05141|ADT2_HUMAN ADP/ATP translocase 2 OS=Homo sapiens OX=9606 GN=SLC25A5 PE=1 SV=7	2	10	10	4	4	4	7	6	6	5	5	5	5	4	4	7	6	6	5	5	5	5	1	1	2	2	3	2	2	1	2	31.5	31.5	12.4	32.852	298	298;315	0	24.008	13.4	11.7	23.8
O43707;F5GXS2;H7C144;A0A8V8TL71;P35609;A0A804HI95;A0A494C1A0;Q08043;A0A494C166;A0A494C033;A0A804HKG0;K7EP19;A0A087WSZ2;A0A494C060;A0A804HIY0;A0A494C0Q3;G3V5M4;G3V2E8	O43707;F5GXS2;H7C144;A0A8V8TL71	40;39;38;38;7;7;7;5;4;4;4;3;3;2;2;2;1;1	40;39;38;38;7;7;7;5;4;4;4;3;3;2;2;2;1;1	27;26;25;27;0;0;0;0;0;0;0;1;0;0;0;0;0;0	Alpha-actinin-4	ACTN4	sp|O43707|ACTN4_HUMAN Alpha-actinin-4 OS=Homo sapiens OX=9606 GN=ACTN4 PE=1 SV=2;tr|F5GXS2|F5GXS2_HUMAN Actinin alpha 4 OS=Homo sapiens OX=9606 GN=ACTN4 PE=1 SV=3;tr|H7C144|H7C144_HUMAN Actinin alpha 4 OS=Homo sapiens OX=9606 GN=ACTN4 PE=1 SV=2;tr|A0A8V8TL	18	40	40	27	36	28	35	4	3	2	13	9	10	36	28	35	4	3	2	13	9	10	23	19	23	2	2	2	9	5	7	49.4	49.4	36.3	104.85	911	911;911;906;864;894;863;858;901;263;182;163;105;944;588;152;131;126;85	0	232.35	47.6	35.8	40.5
O14974;F8VZN8;H0YHI8;A0A3B3ISH4;H0YIS4;H0YIS3;H0YIM2;A0A0U1RQZ1;H0YHL8;F8VW28;H0YIL7;O60237	O14974;F8VZN8	30;18;13;12;11;8;7;5;4;3;1;1	30;18;13;12;11;8;7;5;4;3;1;1	29;18;13;12;11;8;7;5;4;3;1;0	Protein phosphatase 1 regulatory subunit 12A	PPP1R12A	sp|O14974|MYPT1_HUMAN Protein phosphatase 1 regulatory subunit 12A OS=Homo sapiens OX=9606 GN=PPP1R12A PE=1 SV=1;tr|F8VZN8|F8VZN8_HUMAN Protein phosphatase 1 regulatory subunit 12A (Fragment) OS=Homo sapiens OX=9606 GN=PPP1R12A PE=1 SV=1	12	30	30	29	20	18	21	5	5	3	20	21	18	20	18	21	5	5	3	20	21	18	20	17	20	5	5	3	19	20	17	31.5	31.5	30.5	115.28	1030	1030;692;367;381;299;234;188;100;210;97;161;982	0	323.31	23.4	21.7	25.2
K7EK07;Q71DI3;Q16695;P84243;P68431;K7EMV3;A0A590UJJ6;B4DEB1;K7ES00;Q6NXT2;K7EP01	K7EK07;Q71DI3;Q16695;P84243;P68431;K7EMV3;A0A590UJJ6;B4DEB1;K7ES00;Q6NXT2	5;5;5;5;5;4;4;4;4;3;2	5;5;5;5;5;4;4;4;4;3;2	2;2;2;2;2;2;2;2;2;0;0	Histone H3;Histone H3.2;Histone H3.1t;Histone H3.3;Histone H3.1;Histone H3.3C	H3F3B;HIST2H3A;HIST3H3;H3F3A;HIST1H3A;H3F3C	tr|K7EK07|K7EK07_HUMAN Histone H3 (Fragment) OS=Homo sapiens OX=9606 GN=H3-3B PE=1 SV=1;sp|Q71DI3|H32_HUMAN Histone H3.2 OS=Homo sapiens OX=9606 GN=H3C15 PE=1 SV=3;sp|Q16695|H31T_HUMAN Histone H3.1t OS=Homo sapiens OX=9606 GN=H3-4 PE=1 SV=3;sp|P84243|H33_H	11	5	5	2	3	3	1	0	1	0	1	1	3	3	3	1	0	1	0	1	1	3	1	2	0	0	0	0	1	0	1	25.8	25.8	8.3	14.914	132	132;136;136;136;136;92;120;123;151;135;113	0	5.5604	20.5	13.6	5.3
Q96N67;A0A1B0GWE0;A0A1B0GUE9;A0A1B0GVW2;A0A0C4DGY6;A0A0U1RRC1;A0A0U1RQJ5;A0A0U1RR97;A0A0U1RQT6;A2A369;Q8NF50;A0A0U1RQG7;K7EP51	Q96N67;A0A1B0GWE0	55;32;18;12;9;4;4;2;2;2;2;1;1	55;32;18;12;9;4;4;2;2;2;2;1;1	52;30;17;12;9;4;4;2;2;2;2;1;0	Dedicator of cytokinesis protein 7	DOCK7	sp|Q96N67|DOCK7_HUMAN Dedicator of cytokinesis protein 7 OS=Homo sapiens OX=9606 GN=DOCK7 PE=1 SV=4;tr|A0A1B0GWE0|A0A1B0GWE0_HUMAN Dedicator of cytokinesis 7 (Fragment) OS=Homo sapiens OX=9606 GN=DOCK7 PE=1 SV=1	13	55	55	52	27	35	37	3	2	1	26	21	22	27	35	37	3	2	1	26	21	22	26	33	35	3	2	1	26	21	20	26.5	26.5	25.3	242.56	2140	2140;1229;602;443;245;248;255;101;173;1936;2099;46;148	0	246.76	15	18.8	20.2
A0A7P0Z497;P23284;A0A7P0TB45;A0A7P0T7U3	A0A7P0Z497;P23284;A0A7P0TB45	11;11;10;4	11;11;10;4	11;11;10;4	Peptidyl-prolyl cis-trans isomerase B	PPIB	tr|A0A7P0Z497|A0A7P0Z497_HUMAN Peptidyl-prolyl cis-trans isomerase OS=Homo sapiens OX=9606 GN=PPIB PE=1 SV=1;sp|P23284|PPIB_HUMAN Peptidyl-prolyl cis-trans isomerase B OS=Homo sapiens OX=9606 GN=PPIB PE=1 SV=2;tr|A0A7P0TB45|A0A7P0TB45_HUMAN Peptidyl-prolyl	4	11	11	11	9	7	8	6	7	8	6	6	8	9	7	8	6	7	8	6	6	8	9	7	8	6	7	8	6	6	8	60.8	60.8	60.8	20.21	181	181;216;216;123	0	33.402	56.4	41.4	49.2
A0A0G2JLD8;E7EUY5;Q04837;C9K0U8	A0A0G2JLD8;E7EUY5;Q04837;C9K0U8	7;7;7;5	7;7;7;5	7;7;7;5	Single-stranded DNA-binding protein, mitochondrial	SSBP1	tr|A0A0G2JLD8|A0A0G2JLD8_HUMAN Single-stranded DNA-binding protein, mitochondrial (Fragment) OS=Homo sapiens OX=9606 GN=SSBP1 PE=1 SV=1;tr|E7EUY5|E7EUY5_HUMAN Single-stranded DNA-binding protein, mitochondrial (Fragment) OS=Homo sapiens OX=9606 GN=SSBP1 PE	4	7	7	7	6	6	6	3	3	3	5	4	3	6	6	6	3	3	3	5	4	3	6	6	6	3	3	3	5	4	3	40.3	40.3	40.3	15.598	134	134;135;148;121	0	164.46	39.6	33.6	40.3
P61158;B4DXW1;F8WDR7;F8WEW2;F8WE84	P61158;B4DXW1	13;11;2;1;1	13;11;2;1;1	12;10;2;1;1	Actin-related protein 3	ACTR3	sp|P61158|ARP3_HUMAN Actin-related protein 3 OS=Homo sapiens OX=9606 GN=ACTR3 PE=1 SV=3;tr|B4DXW1|B4DXW1_HUMAN Actin related protein 3 OS=Homo sapiens OX=9606 GN=ACTR3 PE=1 SV=1	5	13	13	12	9	10	9	1	1	0	5	7	8	9	10	9	1	1	0	5	7	8	8	9	8	1	1	0	4	6	7	32.3	32.3	30.1	47.371	418	418;367;84;34;41	0	48.046	21.5	25.6	21.3
A0A087WYQ1	A0A087WYQ1	60	50	3			tr|A0A087WYQ1|A0A087WYQ1_HUMAN Spectrin beta chain OS=Homo sapiens OX=9606 GN=SPTBN2 PE=1 SV=1	1	60	50	3	44	46	39	3	5	5	23	26	26	38	39	31	1	2	3	20	22	22	3	2	0	0	0	0	1	2	0	29.1	25.3	0.6	271.68	2397	2397	0	183.63	20.9	21.8	18.7
O75369;A0A804HK76;A0A804HL72;E7EN95;A0A804HJC2;Q14315;A0A0C4DGA1;H7C5L4	O75369;A0A804HK76;A0A804HL72;E7EN95	57;54;52;49;11;5;2;2	57;54;52;49;11;5;2;2	53;50;48;49;7;1;2;2	Filamin-B	FLNB	sp|O75369|FLNB_HUMAN Filamin-B OS=Homo sapiens OX=9606 GN=FLNB PE=1 SV=2;tr|A0A804HK76|A0A804HK76_HUMAN Filamin B OS=Homo sapiens OX=9606 GN=FLNB PE=1 SV=1;tr|A0A804HL72|A0A804HL72_HUMAN Filamin B OS=Homo sapiens OX=9606 GN=FLNB PE=1 SV=1;tr|E7EN95|E7EN95_	8	57	57	53	37	34	37	2	2	0	20	21	21	37	34	37	2	2	0	20	21	21	34	30	34	2	2	0	19	21	20	27.9	27.9	26.9	278.16	2602	2602;2562;2270;2409;521;2725;72;135	0	138.81	18.4	15.7	17.3
P05154;G3V2M1;G3V264;G3V482;G3V265;G3V5I3;G3V4B4;G3V3F5	P05154	13;6;4;3;3;2;1;1	13;6;4;3;3;2;1;1	13;6;4;3;3;2;1;1	Plasma serine protease inhibitor	SERPINA5	sp|P05154|IPSP_HUMAN Plasma serine protease inhibitor OS=Homo sapiens OX=9606 GN=SERPINA5 PE=1 SV=3	8	13	13	13	8	8	6	4	10	3	4	4	5	8	8	6	4	10	3	4	4	5	8	8	6	4	10	3	4	4	5	38.9	38.9	38.9	45.674	406	406;231;172;144;157;45;86;90	0	60.544	22.7	21.9	17
Q9P0K7;D6RE17;D6REL2;D6R9G6;D6RF74;D6RB27;D6R9G4;D6RBY4;D6RB25;D6RBW6;A0A6Q8PFA8;A0A8I5KVE0;A0A8I5QJF9;A0A6Q8PG87;A0A6Q8PGC2;Q9C0D0	Q9P0K7	41;4;3;3;3;2;2;2;1;1;1;1;1;1;1;1	41;4;3;3;3;2;2;2;1;1;1;1;1;1;1;1	41;4;3;3;3;2;2;2;1;1;1;1;1;1;1;1	Ankycorbin	RAI14	sp|Q9P0K7|RAI14_HUMAN Ankycorbin OS=Homo sapiens OX=9606 GN=RAI14 PE=1 SV=2	16	41	41	41	28	30	29	0	1	0	19	22	21	28	30	29	0	1	0	19	22	21	28	30	29	0	1	0	19	22	21	45.6	45.6	45.6	110.04	980	980;150;125;126;139;104;107;114;56;66;488;534;557;596;650;580	0	105.23	32.7	33.1	34.7
Q13045;J3KS54;J3QQQ2;A0A1W2PNT9;J3QQU5;A0A1W2PP30;J3KS39;J3QLR6;A0A1W2PSB1;K7EQZ7;A0A1W2PR04	Q13045	29;13;5;5;3;3;2;2;2;2;2	29;13;5;5;3;3;2;2;2;2;2	29;13;5;5;3;3;2;2;2;2;2	Protein flightless-1 homolog	FLII	sp|Q13045|FLII_HUMAN Protein flightless-1 homolog OS=Homo sapiens OX=9606 GN=FLII PE=1 SV=2	11	29	29	29	19	18	24	3	2	2	14	15	17	19	18	24	3	2	2	14	15	17	19	18	24	3	2	2	14	15	17	22.1	22.1	22.1	144.75	1269	1269;700;279;279;117;117;51;185;185;207;207	0	63.461	14.9	13.8	19.5
A0A1W2PPS1;Q00839;A0A1X7SBS1;A0A994J6V2;A0A1W2PP35;Q5RI18;A0A1W2PQL0;A0A1W2PP34;A0A1W2PPL4;A0A1W2PPH7;A0A1W2PRZ7;A0A1W2PQD4;A0A1W2PQ74;A0A1W2PPE9;A0A1W2PRI6;A0A1W2PP22	A0A1W2PPS1;Q00839;A0A1X7SBS1;A0A994J6V2;A0A1W2PP35;Q5RI18;A0A1W2PQL0;A0A1W2PP34;A0A1W2PPL4;A0A1W2PPH7;A0A1W2PRZ7;A0A1W2PQD4;A0A1W2PQ74	16;16;15;14;14;13;12;12;12;12;10;10;10;3;1;1	16;16;15;14;14;13;12;12;12;12;10;10;10;3;1;1	16;16;15;14;14;13;12;12;12;12;10;10;10;3;1;1	Heterogeneous nuclear ribonucleoprotein U	HNRNPU	tr|A0A1W2PPS1|A0A1W2PPS1_HUMAN Heterogeneous nuclear ribonucleoprotein U OS=Homo sapiens OX=9606 GN=HNRNPU PE=1 SV=1;sp|Q00839|HNRPU_HUMAN Heterogeneous nuclear ribonucleoprotein U OS=Homo sapiens OX=9606 GN=HNRNPU PE=1 SV=6;tr|A0A1X7SBS1|A0A1X7SBS1_HUMAN	16	16	16	16	12	12	12	9	11	10	8	10	8	12	12	12	9	11	10	8	10	8	12	12	12	9	11	10	8	10	8	21.8	21.8	21.8	88.317	804	804;825;744;665;728;602;527;546;547;549;302;327;372;48;128;181	0	323.31	18.9	17.2	17.7
F8VZY9;P05783;CON__H-INV:HIT000015463;CON__Q92764;C4AM86;CON__Q497I4;Q92764	F8VZY9;P05783	19;19;2;2;2;2;2	18;18;2;1;1;1;1	15;15;2;1;1;1;1	Keratin, type I cytoskeletal 18	KRT18	tr|F8VZY9|F8VZY9_HUMAN Keratin 18 OS=Homo sapiens OX=9606 GN=KRT18 PE=1 SV=1;sp|P05783|K1C18_HUMAN Keratin, type I cytoskeletal 18 OS=Homo sapiens OX=9606 GN=KRT18 PE=1 SV=2	7	19	18	15	11	10	15	2	3	2	11	14	7	11	9	14	1	2	1	10	13	6	9	7	12	1	2	1	9	10	4	48.1	46.3	38.4	43.774	391	391;430;295;425;425;455;455	0	70.725	28.4	25.1	39.1
O94832;K7EIG7;J3QRN6;J3KRL0;J3QRR2	O94832;K7EIG7;J3QRN6	29;27;26;11;1	29;27;26;11;1	29;27;26;11;1	Unconventional myosin-Id	MYO1D	sp|O94832|MYO1D_HUMAN Unconventional myosin-Id OS=Homo sapiens OX=9606 GN=MYO1D PE=1 SV=2;tr|K7EIG7|K7EIG7_HUMAN Myosin ID OS=Homo sapiens OX=9606 GN=MYO1D PE=1 SV=1;tr|J3QRN6|J3QRN6_HUMAN Myosin ID OS=Homo sapiens OX=9606 GN=MYO1D PE=1 SV=1	5	29	29	29	20	15	23	2	2	2	6	12	11	20	15	23	2	2	2	6	12	11	20	15	23	2	2	2	6	12	11	31.5	31.5	31.5	116.2	1006	1006;918;961;436;44	0	139.74	21.9	16.5	24.9
A0A7I2V659;A0A087WVQ9;Q5VTE0;P68104;A0A7I2V3H3;A0A7I2V5N4;A0A087WV01;A0A2U3TZH3;Q05639;A0A2R8Y488;A6PW80;Q5JR01;A0A2R8Y660;A0A6Q8PFK6;A0A2R8YDN5	A0A7I2V659;A0A087WVQ9;Q5VTE0;P68104;A0A7I2V3H3;A0A7I2V5N4;A0A087WV01;A0A2U3TZH3;Q05639	8;8;8;8;7;7;6;6;6;3;2;2;2;1;1	8;8;8;8;7;7;6;6;6;3;2;2;2;1;1	8;8;8;8;7;7;6;6;6;3;2;2;2;1;1	Putative elongation factor 1-alpha-like 3;Elongation factor 1-alpha 1;Elongation factor 1-alpha;Elongation factor 1-alpha 2	EEF1A1;EEF1A1P5;EEF1A2	tr|A0A7I2V659|A0A7I2V659_HUMAN Elongation factor 1-alpha OS=Homo sapiens OX=9606 GN=EEF1A1 PE=1 SV=1;tr|A0A087WVQ9|A0A087WVQ9_HUMAN Elongation factor 1-alpha OS=Homo sapiens OX=9606 GN=EEF1A1 PE=1 SV=2;sp|Q5VTE0|EF1A3_HUMAN Putative elongation factor 1-alp	15	8	8	8	6	6	6	5	3	5	4	5	6	6	6	6	5	3	5	4	5	6	6	6	6	5	3	5	4	5	6	17	17	17	49.824	459	459;459;462;462;376;433;426;496;463;173;106;145;152;59;106	0	45.591	13.5	13.5	13.5
A0A0G2JNH2;A0A7I2V5U5;G5E9E7;A0A087X0K9;G3V1L9;Q07157;H0YKB1;H0Y3R8	A0A0G2JNH2;A0A7I2V5U5;G5E9E7;A0A087X0K9;G3V1L9;Q07157	31;31;31;30;30;30;4;2	31;31;31;30;30;30;4;2	31;31;31;30;30;30;4;2	Tight junction protein ZO-1	TJP1	tr|A0A0G2JNH2|A0A0G2JNH2_HUMAN Tight junction protein ZO-1 OS=Homo sapiens OX=9606 GN=TJP1 PE=1 SV=1;tr|A0A7I2V5U5|A0A7I2V5U5_HUMAN Tight junction protein 1 OS=Homo sapiens OX=9606 GN=TJP1 PE=1 SV=1;tr|G5E9E7|G5E9E7_HUMAN Tight junction protein 1 OS=Homo s	8	31	31	31	21	21	23	4	5	5	17	20	19	21	21	23	4	5	5	17	20	19	21	21	23	4	5	5	17	20	19	22.7	22.7	22.7	187.85	1676	1676;1688;1692;1768;1861;1748;383;227	0	122.28	16.3	16.5	17
J3QRS3;P19105;O14950;P24844;J3KTJ1	J3QRS3;P19105;O14950;P24844	6;6;6;3;2	6;6;6;3;2	6;6;6;3;2	Myosin regulatory light chain 12A;Myosin regulatory light chain 12B;Myosin regulatory light polypeptide 9	MYL12A;MYL12B;MYL9	tr|J3QRS3|J3QRS3_HUMAN Myosin light chain 12A OS=Homo sapiens OX=9606 GN=MYL12A PE=1 SV=1;sp|P19105|ML12A_HUMAN Myosin regulatory light chain 12A OS=Homo sapiens OX=9606 GN=MYL12A PE=1 SV=2;sp|O14950|ML12B_HUMAN Myosin regulatory light chain 12B OS=Homo sa	5	6	6	6	5	5	6	2	2	1	2	5	5	5	5	6	2	2	1	2	5	5	5	5	6	2	2	1	2	5	5	29.4	29.4	29.4	20.457	177	177;171;172;172;114	0	77.684	23.7	28.8	29.4
A0A804CF45;O14654	A0A804CF45;O14654	28;28	28;28	28;28	Insulin receptor substrate 4	IRS4	tr|A0A804CF45|A0A804CF45_HUMAN Insulin receptor substrate 4 OS=Homo sapiens OX=9606 GN=IRS4 PE=1 SV=1;sp|O14654|IRS4_HUMAN Insulin receptor substrate 4 OS=Homo sapiens OX=9606 GN=IRS4 PE=1 SV=1	2	28	28	28	20	17	17	3	5	2	13	14	14	20	17	17	3	5	2	13	14	14	20	17	17	3	5	2	13	14	14	26.3	26.3	26.3	133.68	1256	1256;1257	0	130.26	17.9	13.5	16.8
P15924	P15924	56	56	56	Desmoplakin	DSP	sp|P15924|DESP_HUMAN Desmoplakin OS=Homo sapiens OX=9606 GN=DSP PE=1 SV=3	1	56	56	56	28	37	29	8	14	12	20	25	25	28	37	29	8	14	12	20	25	25	28	37	29	8	14	12	20	25	25	18.7	18.7	18.7	331.77	2871	2871	0	107.85	10.3	12.9	10.3
Q6W4X9;E9PJC5	Q6W4X9	12;1	12;1	12;1	Mucin-6	MUC6	sp|Q6W4X9|MUC6_HUMAN Mucin-6 OS=Homo sapiens OX=9606 GN=MUC6 PE=1 SV=3	2	12	12	12	7	7	10	9	6	6	8	9	9	7	7	10	9	6	6	8	9	9	7	7	10	9	6	6	8	9	9	5.8	5.8	5.8	257.05	2439	2439;181	0	74.797	3.4	4.3	5
P11142;E9PKE3;E9PN89;E9PNE6;E9PLF4;A8K7Q2;E9PQQ4;E9PQK7;E9PK54;E9PPY6;E9PN25;E9PI65;E9PM13;E9PS65	P11142;E9PKE3;E9PN89;E9PNE6	22;21;17;13;10;10;9;9;9;7;6;6;2;2	20;19;17;11;9;9;8;8;8;6;5;5;1;1	12;11;9;7;7;5;7;7;7;5;4;3;1;1	Heat shock cognate 71 kDa protein	HSPA8	sp|P11142|HSP7C_HUMAN Heat shock cognate 71 kDa protein OS=Homo sapiens OX=9606 GN=HSPA8 PE=1 SV=1;tr|E9PKE3|E9PKE3_HUMAN Heat shock protein family A (Hsp70) member 8 OS=Homo sapiens OX=9606 GN=HSPA8 PE=1 SV=1;tr|E9PN89|E9PN89_HUMAN Heat shock protein fami	14	22	20	12	16	15	16	10	11	8	11	11	12	15	14	15	10	10	8	9	10	10	8	8	8	3	5	4	6	6	4	32.7	29.3	18.7	70.897	646	646;627;312;500;187;410;171;178;183;137;132;168;150;223	0	67.921	23.5	25.7	24.6
Q12965;H0YNQ8;O00160;H0YLE5;H0YN00;H0YLJ4	Q12965	29;7;6;4;2;2	29;7;6;4;2;2	29;7;6;4;2;2	Unconventional myosin-Ie	MYO1E	sp|Q12965|MYO1E_HUMAN Unconventional myosin-Ie OS=Homo sapiens OX=9606 GN=MYO1E PE=1 SV=2	6	29	29	29	22	17	23	1	1	2	11	10	12	22	17	23	1	1	2	11	10	12	22	17	23	1	1	2	11	10	12	28.8	28.8	28.8	127.06	1108	1108;317;1098;187;112;276	0	50.654	21.6	15.7	23.1
P0CG48;F5GYU3;Q96C32;J3QKN0;F5GXK7;F5H747;F5H388;B4DV12;F5H265;F5H2Z3;F5H6Q2;J3QTR3;J3QS39;P62987;P62979;P0CG47;M0R2S1;M0R1M6;M0R1V7;F5GZ39;J3QSA3	P0CG48;F5GYU3;Q96C32;J3QKN0;F5GXK7;F5H747;F5H388;B4DV12;F5H265;F5H2Z3;F5H6Q2;J3QTR3;J3QS39;P62987;P62979;P0CG47;M0R2S1;M0R1M6;M0R1V7;F5GZ39;J3QSA3	4;4;4;4;4;4;4;4;4;4;4;4;4;4;4;4;3;3;3;2;2	4;4;4;4;4;4;4;4;4;4;4;4;4;4;4;4;3;3;3;2;2	4;4;4;4;4;4;4;4;4;4;4;4;4;4;4;4;3;3;3;2;2	Polyubiquitin-C;Ubiquitin;Ubiquitin-60S ribosomal protein L40;Ubiquitin;60S ribosomal protein L40;Ubiquitin-40S ribosomal protein S27a;Ubiquitin;40S ribosomal protein S27a;Polyubiquitin-B;Ubiquitin	UBC;UBB;RPS27A;UBA52	sp|P0CG48|UBC_HUMAN Polyubiquitin-C OS=Homo sapiens OX=9606 GN=UBC PE=1 SV=3;tr|F5GYU3|F5GYU3_HUMAN Ubiquitin C (Fragment) OS=Homo sapiens OX=9606 GN=UBC PE=1 SV=1;tr|Q96C32|Q96C32_HUMAN UBC protein OS=Homo sapiens OX=9606 GN=UBC PE=1 SV=1;tr|J3QKN0|J3QKN0	21	4	4	4	3	4	4	2	1	2	3	4	4	3	4	4	2	1	2	3	4	4	3	4	4	2	1	2	3	4	4	61.8	61.8	61.8	77.038	685	685;134;305;206;169;160;155;153;149;136;122;106;93;128;156;229;138;114;63;61;43	0	96.624	49.9	61.8	61.8
P60709;E7EVS6;Q6S8J3;A5A3E0;A0A2R8YFE2;P0CG38;P0CG39;Q9BYX7	P60709;E7EVS6	34;29;10;9;8;8;6;4	1;1;0;0;0;0;0;0	0;0;0;0;0;0;0;0	Actin, cytoplasmic 1;Actin, cytoplasmic 1, N-terminally processed	ACTB	sp|P60709|ACTB_HUMAN Actin, cytoplasmic 1 OS=Homo sapiens OX=9606 GN=ACTB PE=1 SV=1;tr|E7EVS6|E7EVS6_HUMAN Actin beta OS=Homo sapiens OX=9606 GN=ACTB PE=1 SV=9	8	34	1	0	32	29	30	17	20	19	23	23	23	1	1	1	1	1	0	1	0	0	0	0	0	0	0	0	0	0	0	82.9	4.5	0	41.736	375	375;334;1075;1075;79;1075;1038;375	0	84.469	81.6	68.5	69.6
Q9NYL9;H0YNJ8;H0YKU1	Q9NYL9;H0YNJ8;H0YKU1	14;10;9	14;10;9	13;9;8	Tropomodulin-3	TMOD3	sp|Q9NYL9|TMOD3_HUMAN Tropomodulin-3 OS=Homo sapiens OX=9606 GN=TMOD3 PE=1 SV=1;tr|H0YNJ8|H0YNJ8_HUMAN Tropomodulin 3 OS=Homo sapiens OX=9606 GN=TMOD3 PE=1 SV=1;tr|H0YKU1|H0YKU1_HUMAN Tropomodulin 3 (Fragment) OS=Homo sapiens OX=9606 GN=TMOD3 PE=1 SV=1	3	14	14	13	8	7	10	0	3	2	3	4	3	8	7	10	0	3	2	3	4	3	7	7	9	0	3	2	2	3	2	44.3	44.3	41.8	39.594	352	352;213;187	0	43.614	28.4	19.9	34.1
A0A994J771;Q92614;H0YEV9;A0A1B0GWJ6	A0A994J771;Q92614	49;49;3;1	49;49;3;1	49;49;3;1	Unconventional myosin-XVIIIa	MYO18A	tr|A0A994J771|A0A994J771_HUMAN Myosin XVIIIA OS=Homo sapiens OX=9606 GN=MYO18A PE=4 SV=1;sp|Q92614|MY18A_HUMAN Unconventional myosin-XVIIIa OS=Homo sapiens OX=9606 GN=MYO18A PE=1 SV=3	4	49	49	49	27	24	27	0	1	0	24	27	21	27	24	27	0	1	0	24	27	21	27	24	27	0	1	0	24	27	21	24.8	24.8	24.8	232.47	2051	2051;2054;172;340	0	132.65	13.6	12.6	14.2
P11940;A0A7I2YQ88;H0YAR2;E7EQV3;A0A7I2V4N4;E7ERJ7;A0A7I2V649;A0A087WTT1;A0A7I2YQE4;A0A7I2YQ90;H0YBN4;Q9H361;H0YAP2;H0YB86;E5RGH3;A0A6Q8JFT6;H0YCC8;E5RJB9;E5RH24;H0YEQ8;Q4VXU2;A0A6I8PLA1;A0A6I8PS38;A0A6Q8JFV4;Q96DU9;E5RHG7	P11940;A0A7I2YQ88;H0YAR2;E7EQV3;A0A7I2V4N4;E7ERJ7;A0A7I2V649;A0A087WTT1;A0A7I2YQE4;A0A7I2YQ90	17;17;17;17;16;16;16;16;15;12;7;6;6;5;4;3;3;3;3;3;3;2;2;1;1;1	17;17;17;17;16;16;16;16;15;12;7;6;6;5;4;3;3;3;3;3;3;2;2;1;1;1	11;11;11;11;11;10;10;10;11;6;2;5;6;4;2;2;0;1;1;0;2;1;1;1;1;0	Polyadenylate-binding protein 1;Polyadenylate-binding protein	PABPC1	sp|P11940|PABP1_HUMAN Polyadenylate-binding protein 1 OS=Homo sapiens OX=9606 GN=PABPC1 PE=1 SV=2;tr|A0A7I2YQ88|A0A7I2YQ88_HUMAN Polyadenylate-binding protein OS=Homo sapiens OX=9606 GN=PABPC1 PE=1 SV=1;tr|H0YAR2|H0YAR2_HUMAN Polyadenylate-binding protein	26	17	17	11	4	2	3	11	10	10	12	11	12	4	2	3	11	10	10	12	11	12	2	1	1	7	5	7	7	7	8	26.3	26.3	16.4	70.67	636	636;633;599;591;577;604;590;588;565;604;174;631;131;165;108;619;197;129;118;112;614;199;174;192;382;75	0	59.537	8.6	3.9	5.8
Q96SB3	Q96SB3	19	19	19	Neurabin-2	PPP1R9B	sp|Q96SB3|NEB2_HUMAN Neurabin-2 OS=Homo sapiens OX=9606 GN=PPP1R9B PE=1 SV=3	1	19	19	19	12	12	14	1	3	2	13	11	14	12	12	14	1	3	2	13	11	14	12	12	14	1	3	2	13	11	14	25	25	25	89.333	817	817	0	75.223	18.6	19.6	16.8
P07910;G3V4C1;B4DY08;G3V576;G3V4W0;G3V2Q1;G3V555;G3V575;B4DSU6;G3V251;G3V3K6;G3V5X6;A0A0G2JPF8;O60812;B2RXH8;G3V4M8;B7ZW38;P0DMR1;A0A0G2JNQ3;G3V2H6;G3V2D6;G3V5V7	P07910;G3V4C1;B4DY08;G3V576;G3V4W0;G3V2Q1;G3V555;G3V575;B4DSU6;G3V251;G3V3K6;G3V5X6;A0A0G2JPF8;O60812;B2RXH8;G3V4M8;B7ZW38;P0DMR1;A0A0G2JNQ3	13;13;13;13;13;13;10;10;8;8;8;8;7;7;7;7;7;7;7;6;5;5	13;13;13;13;13;13;10;10;8;8;8;8;7;7;7;7;7;7;7;6;5;5	13;13;13;13;13;13;10;10;8;8;8;8;7;7;7;7;7;7;7;6;5;5	Heterogeneous nuclear ribonucleoproteins C1/C2;Heterogeneous nuclear ribonucleoprotein C-like 1;Heterogeneous nuclear ribonucleoprotein C-like 2;Heterogeneous nuclear ribonucleoprotein C-like 3;Heterogeneous nuclear ribonucleoprotein C-like 4	HNRNPC;HNRNPCL1;HNRNPCL2;HNRNPCL3;HNRNPCL4	sp|P07910|HNRPC_HUMAN Heterogeneous nuclear ribonucleoproteins C1/C2 OS=Homo sapiens OX=9606 GN=HNRNPC PE=1 SV=4;tr|G3V4C1|G3V4C1_HUMAN Heterogeneous nuclear ribonucleoprotein C OS=Homo sapiens OX=9606 GN=HNRNPC PE=1 SV=1;tr|B4DY08|B4DY08_HUMAN Heterogeneo	22	13	13	13	13	8	8	2	4	3	2	2	3	13	8	8	2	4	3	2	2	3	13	8	8	2	4	3	2	2	3	32.4	32.4	32.4	33.67	306	306;292;288;231;262;305;175;187;147;126;121;117;293;293;293;66;293;293;293;54;214;180	0	26.083	32.4	20.6	20.6
F8WCF6;P59998;F8WDD7;A0A0A6YYG9;H7C0A3;F8WE39;R4GN08;F8WDW3	F8WCF6;P59998;F8WDD7;A0A0A6YYG9;H7C0A3	6;6;5;5;4;2;2;1	6;6;5;5;4;2;2;1	6;6;5;5;4;2;2;1	Actin-related protein 2/3 complex subunit 4	ARPC4-TTLL3;ARPC4	tr|F8WCF6|F8WCF6_HUMAN Actin-related protein 2/3 complex subunit 4 OS=Homo sapiens OX=9606 GN=ARPC4-TTLL3 PE=3 SV=1;sp|P59998|ARPC4_HUMAN Actin-related protein 2/3 complex subunit 4 OS=Homo sapiens OX=9606 GN=ARPC4 PE=1 SV=3;tr|F8WDD7|F8WDD7_HUMAN Actin re	8	6	6	6	5	4	5	0	2	0	4	2	5	5	4	5	0	2	0	4	2	5	5	4	5	0	2	0	4	2	5	32.6	32.6	32.6	21.058	181	181;168;113;625;167;47;77;44	0	9.5301	28.2	22.1	28.2
P14923;C9J826;C9JK18;C9JKY1;C9JTX4;C9JPI2;K7ERP3	P14923	21;8;8;8;7;1;1	21;8;8;8;7;1;1	20;8;8;8;7;1;1	Junction plakoglobin	JUP	sp|P14923|PLAK_HUMAN Junction plakoglobin OS=Homo sapiens OX=9606 GN=JUP PE=1 SV=3	7	21	21	20	14	10	11	7	7	9	9	8	9	14	10	11	7	7	9	9	8	9	14	10	11	7	7	9	8	8	9	36.2	36.2	34.9	81.744	745	745;276;295;297;235;86;104	0	48.064	25.2	15.8	18.9
P23246;A0A8Q3WMA7;H0Y9K7	P23246;A0A8Q3WMA7	19;19;6	19;19;6	17;17;6	Splicing factor, proline- and glutamine-rich	SFPQ	sp|P23246|SFPQ_HUMAN Splicing factor, proline- and glutamine-rich OS=Homo sapiens OX=9606 GN=SFPQ PE=1 SV=2;tr|A0A8Q3WMA7|A0A8Q3WMA7_HUMAN Splicing factor proline and glutamine rich OS=Homo sapiens OX=9606 GN=SFPQ PE=1 SV=1	3	19	19	17	11	13	12	1	1	0	8	7	8	11	13	12	1	1	0	8	7	8	10	12	12	1	1	0	8	6	8	28.1	28.1	26.7	76.149	707	707;728;223	0	69.381	17.8	23.9	19.9
P07900;G3V2J8;Q14568;Q58FG0	P07900	16;3;3;1	16;3;3;1	11;2;1;1	Heat shock protein HSP 90-alpha	HSP90AA1	sp|P07900|HS90A_HUMAN Heat shock protein HSP 90-alpha OS=Homo sapiens OX=9606 GN=HSP90AA1 PE=1 SV=5	4	16	16	11	7	5	7	5	8	6	8	7	8	7	5	7	5	8	6	8	7	8	5	4	5	4	4	5	5	5	5	23.8	23.8	15.3	84.659	732	732;174;343;334	0	60.918	11.7	8.9	11.6
Q9ULV4;B4E3S0;H0YHL7;F8W1H8;F8VUX3;F8VSA4;F8VRE9;F8VTT6;F8VVB7;F8VV53;J3QLV6;J3KSS5;Q6QEF8	Q9ULV4;B4E3S0;H0YHL7	15;13;9;4;4;4;4;4;4;3;1;1;1	15;13;9;4;4;4;4;4;4;3;1;1;1	15;13;9;4;4;4;4;4;4;3;1;1;1	Coronin-1C;Coronin	CORO1C	sp|Q9ULV4|COR1C_HUMAN Coronin-1C OS=Homo sapiens OX=9606 GN=CORO1C PE=1 SV=1;tr|B4E3S0|B4E3S0_HUMAN Coronin OS=Homo sapiens OX=9606 GN=CORO1C PE=1 SV=1;tr|H0YHL7|H0YHL7_HUMAN Coronin 1C (Fragment) OS=Homo sapiens OX=9606 GN=CORO1C PE=1 SV=1	13	15	15	15	12	13	10	0	1	2	9	7	9	12	13	10	0	1	2	9	7	9	12	13	10	0	1	2	9	7	9	27.6	27.6	27.6	53.248	474	474;369;165;151;159;162;163;169;181;125;432;471;472	0	23.442	23.6	25.9	20.3
P31943;G8JLB6;E9PCY7;D6RBM0;D6RIU0;D6RIT2;H0YB39;D6RIH9;D6RJ04;D6RDU3;E7EN40;D6RFM3;D6R9T0;E5RGV0;D6RAM1;E7EQJ0;D6RF17;H0YBG7;H0YBD7;E5RGH4;D6RDL0;H0YAQ2;D6R9D3	P31943;G8JLB6;E9PCY7;D6RBM0;D6RIU0;D6RIT2;H0YB39;D6RIH9;D6RJ04;D6RDU3;E7EN40;D6RFM3;D6R9T0;E5RGV0;D6RAM1;E7EQJ0	6;6;6;4;4;3;3;3;3;3;3;3;3;3;3;3;2;2;2;2;2;1;1	6;6;6;4;4;3;3;3;3;3;3;3;3;3;3;3;2;2;2;2;2;1;1	2;2;2;2;2;2;0;2;2;2;2;2;2;1;2;2;2;0;0;0;2;0;1	Heterogeneous nuclear ribonucleoprotein H;Heterogeneous nuclear ribonucleoprotein H, N-terminally processed	HNRNPH1	sp|P31943|HNRH1_HUMAN Heterogeneous nuclear ribonucleoprotein H OS=Homo sapiens OX=9606 GN=HNRNPH1 PE=1 SV=4;tr|G8JLB6|G8JLB6_HUMAN Heterogeneous nuclear ribonucleoprotein H1 OS=Homo sapiens OX=9606 GN=HNRNPH1 PE=1 SV=1;tr|E9PCY7|E9PCY7_HUMAN Heterogeneous	23	6	6	2	3	5	4	4	5	4	6	5	6	3	5	4	4	5	4	6	5	6	0	1	1	1	1	1	2	1	2	17.4	17.4	4.9	49.229	449	449;472;429;212;168;164;277;184;172;171;166;163;161;155;130;115;49;185;194;100;84;131;40	0	37.497	8.9	14.5	11.6
Q9Y2F5	Q9Y2F5	1	1	1	Little elongation complex subunit 1	ICE1	sp|Q9Y2F5|ICE1_HUMAN Little elongation complex subunit 1 OS=Homo sapiens OX=9606 GN=ICE1 PE=1 SV=5	1	1	1	1	1	1	1	1	1	1	1	1	1	1	1	1	1	1	1	1	1	1	1	1	1	1	1	1	1	1	1	0.7	0.7	0.7	247.89	2266	2266	0.0021645	2.2785	0.7	0.7	0.7
P07197;E7ESP9;E7EMV2	P07197;E7ESP9;E7EMV2	21;21;19	19;19;17	18;18;16	Neurofilament medium polypeptide	NEFM	sp|P07197|NFM_HUMAN Neurofilament medium polypeptide OS=Homo sapiens OX=9606 GN=NEFM PE=1 SV=3;tr|E7ESP9|E7ESP9_HUMAN Neurofilament medium chain OS=Homo sapiens OX=9606 GN=NEFM PE=1 SV=1;tr|E7EMV2|E7EMV2_HUMAN Neurofilament medium chain OS=Homo sapiens OX=	3	21	19	18	14	13	15	1	1	0	8	10	7	12	11	13	0	0	0	7	9	6	11	11	12	0	0	0	6	9	6	25.5	24.2	23.4	102.47	916	916;877;698	0	55.56	17.9	17	18.8
O15144;H7C3F9;C9JTV5;G5E9J0;G5E9S7	O15144	15;5;4;4;2	15;5;4;4;2	15;5;4;4;2	Actin-related protein 2/3 complex subunit 2	ARPC2	sp|O15144|ARPC2_HUMAN Actin-related protein 2/3 complex subunit 2 OS=Homo sapiens OX=9606 GN=ARPC2 PE=1 SV=1	5	15	15	15	9	11	11	2	1	2	3	3	7	9	11	11	2	1	2	3	3	7	9	11	11	2	1	2	3	3	7	37.7	37.7	37.7	34.333	300	300;165;89;91;38	0	79.192	25.7	30	29.3
P81605	P81605	3	3	3	Dermcidin;Survival-promoting peptide;DCD-1	DCD	sp|P81605|DCD_HUMAN Dermcidin OS=Homo sapiens OX=9606 GN=DCD PE=1 SV=2	1	3	3	3	3	3	3	2	2	1	2	3	2	3	3	3	2	2	1	2	3	2	3	3	3	2	2	1	2	3	2	22.7	22.7	22.7	11.284	110	110	0	21.077	22.7	22.7	22.7
P61160;A0A1B0GWD0;A0A1B0GWH0	P61160	11;2;2	11;2;2	11;2;2	Actin-related protein 2	ACTR2	sp|P61160|ARP2_HUMAN Actin-related protein 2 OS=Homo sapiens OX=9606 GN=ACTR2 PE=1 SV=1	3	11	11	11	7	6	9	2	0	1	4	6	3	7	6	9	2	0	1	4	6	3	7	6	9	2	0	1	4	6	3	30.2	30.2	30.2	44.76	394	394;53;65	0	25.661	23.6	20.3	24.6
P28290;E9PHV5;E7EUL7;H7BZ26	P28290;E9PHV5;E7EUL7	22;21;16;3	22;21;16;3	22;21;16;3	Sperm-specific antigen 2	SSFA2	sp|P28290|ITPI2_HUMAN Protein ITPRID2 OS=Homo sapiens OX=9606 GN=ITPRID2 PE=1 SV=3;tr|E9PHV5|E9PHV5_HUMAN ITPR interacting domain containing 2 OS=Homo sapiens OX=9606 GN=ITPRID2 PE=1 SV=1;tr|E7EUL7|E7EUL7_HUMAN ITPR interacting domain containing 2 OS=Homo	4	22	22	22	15	11	13	1	1	0	14	11	15	15	11	13	1	1	0	14	11	15	15	11	13	1	1	0	14	11	15	19	19	19	138.38	1259	1259;1237;768;201	0	58.305	13.4	10	11
P08754;P04899;P63096;A8MTJ3;P19087;P09471;P11488;A0A3B3ITM0;A0A1W2PRE1;H3BTM2;A0A1W2PP38;A0A1W2PQK2;A0A3B3IUA8;A0A1W2PS82;A0A087WTB6;A0A6Q8PGR1;A0A1W2PRJ7;Q5JWD1;A0A087WZE5;A2A2R6;H0Y7E8;P38405	P08754	9;4;4;2;2;2;2;2;1;1;1;1;1;1;1;1;1;1;1;1;1;1	9;4;4;2;2;2;2;2;1;1;1;1;1;1;1;1;1;1;1;1;1;1	8;3;3;1;1;1;1;2;0;1;1;0;0;0;0;0;0;0;0;0;0;0	Guanine nucleotide-binding protein G(k) subunit alpha	GNAI3	sp|P08754|GNAI3_HUMAN Guanine nucleotide-binding protein G(i) subunit alpha-3 OS=Homo sapiens OX=9606 GN=GNAI3 PE=1 SV=3	22	9	9	8	5	5	7	1	2	0	5	4	3	5	5	7	1	2	0	5	4	3	4	4	6	0	1	0	4	3	2	27.1	27.1	24	40.532	354	354;355;354;354;354;354;350;168;54;195;196;61;148;146;84;110;104;87;123;72;730;381	0	28.053	16.7	16.1	18.9
Q96C19;H0Y4Y4	Q96C19	10;3	10;3	9;2	EF-hand domain-containing protein D2	EFHD2	sp|Q96C19|EFHD2_HUMAN EF-hand domain-containing protein D2 OS=Homo sapiens OX=9606 GN=EFHD2 PE=1 SV=1	2	10	10	9	7	8	6	1	2	1	6	2	5	7	8	6	1	2	1	6	2	5	6	7	5	1	2	1	5	1	4	32.5	32.5	27.9	26.697	240	240;179	0	28.027	28.8	29.6	25.4
P21333;Q60FE5;A0A7P0NMY4;A0A087WWY3;A0A7I2V3E6;F8WE98;H0Y5F3;A0A669KBC6	P21333;Q60FE5;A0A7P0NMY4	35;34;25;11;11;11;2;1	31;30;21;7;7;7;2;1	31;30;21;7;7;7;2;1	Filamin-A	FLNA	sp|P21333|FLNA_HUMAN Filamin-A OS=Homo sapiens OX=9606 GN=FLNA PE=1 SV=4;tr|Q60FE5|Q60FE5_HUMAN Filamin A OS=Homo sapiens OX=9606 GN=FLNA PE=1 SV=1;tr|A0A7P0NMY4|A0A7P0NMY4_HUMAN Filamin A OS=Homo sapiens OX=9606 GN=FLNA PE=1 SV=1	8	35	31	31	23	23	20	1	2	0	16	20	18	20	19	17	1	2	0	15	20	17	20	19	17	1	2	0	15	20	17	17.8	16.8	16.8	280.74	2647	2647;2620;1574;482;556;604;232;96	0	234.61	11	11.5	9.4
Q14126;A0A804HJ09;A0A804HLK9;J3KSI6;A0A804HIA2;A0A804HJQ3	Q14126	22;6;5;4;4;3	22;6;5;4;4;3	22;6;5;4;4;3	Desmoglein-2	DSG2	sp|Q14126|DSG2_HUMAN Desmoglein-2 OS=Homo sapiens OX=9606 GN=DSG2 PE=1 SV=2	6	22	22	22	10	12	14	1	1	0	8	9	6	10	12	14	1	1	0	8	9	6	10	12	14	1	1	0	8	9	6	25.3	25.3	25.3	122.29	1118	1118;371;306;232;248;185	0	51.672	10.4	14	14.8
Q14247;H0YCD9;H0YEV2	Q14247	17;4;3	17;4;3	17;4;3	Src substrate cortactin	CTTN	sp|Q14247|SRC8_HUMAN Src substrate cortactin OS=Homo sapiens OX=9606 GN=CTTN PE=1 SV=2	3	17	17	17	10	8	9	0	0	0	10	14	11	10	8	9	0	0	0	10	14	11	10	8	9	0	0	0	10	14	11	33.8	33.8	33.8	61.585	550	550;265;128	0	63.748	20.5	17.8	21.5
Q08211	Q08211	16	16	16	ATP-dependent RNA helicase A	DHX9	sp|Q08211|DHX9_HUMAN ATP-dependent RNA helicase A OS=Homo sapiens OX=9606 GN=DHX9 PE=1 SV=4	1	16	16	16	11	12	9	9	8	8	8	6	8	11	12	9	9	8	8	8	6	8	11	12	9	9	8	8	8	6	8	14.5	14.5	14.5	140.96	1270	1270	0	47.836	9.8	10.9	8
Q9NVI7;Q5SV16	Q9NVI7	11;5	11;5	4;2	ATPase family AAA domain-containing protein 3A	ATAD3A	sp|Q9NVI7|ATD3A_HUMAN ATPase family AAA domain-containing protein 3A OS=Homo sapiens OX=9606 GN=ATAD3A PE=1 SV=2	2	11	11	4	5	7	7	3	4	3	6	6	6	5	7	7	3	4	3	6	6	6	1	3	3	1	2	1	2	2	1	18.3	18.3	7.1	71.368	634	634;253	0	35.848	8.2	12.6	10.9
Q9P2M7;A6PVU7;A2A3M4;H0Y4A8	Q9P2M7	28;7;5;1	28;7;5;1	28;7;5;1	Cingulin	CGN	sp|Q9P2M7|CING_HUMAN Cingulin OS=Homo sapiens OX=9606 GN=CGN PE=1 SV=3	4	28	28	28	18	13	15	0	1	0	14	14	14	18	13	15	0	1	0	14	14	14	18	13	15	0	1	0	14	14	14	28.2	28.2	28.2	137.06	1203	1203;291;170;131	0	77.099	18.7	12.6	15.6
A0A2R8YFR4;A0A2R8Y5G6;O00571;A0A2R8YCW1;A0A0D9SF53;A0A0D9SG12;A0A2R8Y645;A0A2R8YF78;A0A0D9SFB3;A0A2U3TZJ9;A0A2R8Y4A4;A0A2R8YFS5;A0A2R8YDT5;A0A2R8Y7T2;F6S8Q4;O15523;A0A2R8YDH3;A0A0J9YVQ7;A0A087WVZ1;C9J081;C9J8G5;A0A2R8Y4D2;D6RCM4;Q9NQI0;A0A2R8YCU0;H0Y960;A0A2R8Y650	A0A2R8YFR4;A0A2R8Y5G6;O00571;A0A2R8YCW1;A0A0D9SF53;A0A0D9SG12;A0A2R8Y645;A0A2R8YF78;A0A0D9SFB3;A0A2U3TZJ9;A0A2R8Y4A4;A0A2R8YFS5;A0A2R8YDT5;A0A2R8Y7T2;F6S8Q4;O15523;A0A2R8YDH3	19;19;19;19;19;19;19;19;19;19;19;19;18;18;16;15;14;6;6;4;3;2;2;2;1;1;1	19;19;19;19;19;19;19;19;19;19;19;19;18;18;16;15;14;6;6;4;3;2;2;2;1;1;1	18;18;18;18;18;18;18;18;18;18;18;18;17;17;15;14;13;6;6;4;3;2;2;2;1;1;1	ATP-dependent RNA helicase DDX3X;ATP-dependent RNA helicase DDX3Y	DDX3X;DDX3Y	tr|A0A2R8YFR4|A0A2R8YFR4_HUMAN RNA helicase OS=Homo sapiens OX=9606 GN=DDX3X PE=1 SV=1;tr|A0A2R8Y5G6|A0A2R8Y5G6_HUMAN RNA helicase OS=Homo sapiens OX=9606 GN=DDX3X PE=1 SV=1;sp|O00571|DDX3X_HUMAN ATP-dependent RNA helicase DDX3X OS=Homo sapiens OX=9606 GN=	27	19	19	18	12	8	13	5	6	1	12	10	12	12	8	13	5	6	1	12	10	12	11	7	12	5	5	1	11	9	11	31.4	31.4	29.7	73.126	660	660;622;662;647;733;647;716;641;640;661;662;661;475;476;629;660;503;222;189;250;224;78;518;724;181;305;193	0	43.569	20.8	13.6	21.2
Q12906;K7EQR9;K7EKJ9;K7ERM6;K7ENK6;K7EM82;K7EJ09;K7ER69;Q96SI9	Q12906	13;3;3;1;1;1;1;1;1	13;3;3;1;1;1;1;1;1	13;3;3;1;1;1;1;1;1	Interleukin enhancer-binding factor 3	ILF3	sp|Q12906|ILF3_HUMAN Interleukin enhancer-binding factor 3 OS=Homo sapiens OX=9606 GN=ILF3 PE=1 SV=3	9	13	13	13	9	6	8	6	8	6	5	7	8	9	6	8	6	8	6	5	7	8	9	6	8	6	8	6	5	7	8	16.3	16.3	16.3	95.337	894	894;180;254;77;79;99;122;161;672	0	23.846	12	9.1	12
P12273	P12273	7	7	7	Prolactin-inducible protein	PIP	sp|P12273|PIP_HUMAN Prolactin-inducible protein OS=Homo sapiens OX=9606 GN=PIP PE=1 SV=1	1	7	7	7	2	2	5	3	2	2	5	3	3	2	2	5	3	2	2	5	3	3	2	2	5	3	2	2	5	3	3	51.4	51.4	51.4	16.572	146	146	0	18.928	13	13	40.4
P16278;E7EQ29;C9J539;F8WF40;C9JF15;C9JWX1;C9J4G9;Q6UWU2	P16278;E7EQ29	12;9;3;2;2;2;2;1	12;9;3;2;2;2;2;1	12;9;3;2;2;2;2;1	Beta-galactosidase	GLB1	sp|P16278|BGAL_HUMAN Beta-galactosidase OS=Homo sapiens OX=9606 GN=GLB1 PE=1 SV=2;tr|E7EQ29|E7EQ29_HUMAN Beta-galactosidase OS=Homo sapiens OX=9606 GN=GLB1 PE=1 SV=1	8	12	12	12	6	7	8	0	0	0	3	3	1	6	7	8	0	0	0	3	3	1	6	7	8	0	0	0	3	3	1	19.2	19.2	19.2	76.074	677	677;546;114;84;102;147;185;654	0	40.656	12	13	12.4
P07437;Q5JP53;Q9BVA1;Q13885;Q5ST81;Q13509;A0A0B4J269;Q5SQY0;A6NNZ2;A0A075B736;Q9H4B7;Q9BUF5;CON__ENSEMBL:ENSBTAP00000025008;K7ESM5;M0R2D3;G3V2A3;G3V2N6;M0QYM7;G3V2R8;G3V3R4;M0R042;G3V5W4	P07437;Q5JP53;Q9BVA1;Q13885;Q5ST81;Q13509;A0A0B4J269;Q5SQY0;A6NNZ2;A0A075B736	10;10;8;8;8;6;6;5;5;5;4;4;4;4;2;2;1;1;1;1;1;1	10;10;8;8;8;6;6;5;5;5;4;4;4;4;2;2;1;1;1;1;1;1	2;2;1;1;0;1;1;0;0;0;0;0;0;0;0;0;1;0;1;1;0;1	Tubulin beta chain;Tubulin beta-2B chain;Tubulin beta-2A chain;Tubulin beta-3 chain;Tubulin beta-8 chain-like protein LOC260334	TUBB;TUBB2B;TUBB2A;TUBB3;TUBB8	sp|P07437|TBB5_HUMAN Tubulin beta chain OS=Homo sapiens OX=9606 GN=TUBB PE=1 SV=2;tr|Q5JP53|Q5JP53_HUMAN Tubulin beta chain OS=Homo sapiens OX=9606 GN=TUBB PE=1 SV=1;sp|Q9BVA1|TBB2B_HUMAN Tubulin beta-2B chain OS=Homo sapiens OX=9606 GN=TUBB2B PE=1 SV=1;sp	22	10	10	2	7	4	7	2	1	1	5	6	6	7	4	7	2	1	1	5	6	6	1	0	1	0	0	0	2	2	2	23.4	23.4	6.1	49.67	444	444;426;445;445;372;450;797;410;444;407;451;446;536;338;155;189;164;160;118;148;144;97	0	36.227	15.5	7.4	15.5
Q14573	Q14573	27	27	23	Inositol 1,4,5-trisphosphate receptor type 3	ITPR3	sp|Q14573|ITPR3_HUMAN Inositol 1,4,5-trisphosphate receptor type 3 OS=Homo sapiens OX=9606 GN=ITPR3 PE=1 SV=2	1	27	27	23	12	13	21	0	1	1	7	11	9	12	13	21	0	1	1	7	11	9	11	11	18	0	1	1	7	10	9	10.9	10.9	9.6	304.1	2671	2671	0	54.013	4.9	5.7	8.2
P62241;Q5JR95	P62241;Q5JR95	9;8	9;8	9;8	40S ribosomal protein S8	RPS8	sp|P62241|RS8_HUMAN 40S ribosomal protein S8 OS=Homo sapiens OX=9606 GN=RPS8 PE=1 SV=2;tr|Q5JR95|Q5JR95_HUMAN 40S ribosomal protein S8 OS=Homo sapiens OX=9606 GN=RPS8 PE=1 SV=1	2	9	9	9	9	6	7	4	3	2	4	5	4	9	6	7	4	3	2	4	5	4	9	6	7	4	3	2	4	5	4	50.5	50.5	50.5	24.205	208	208;188	0	172.67	50.5	37.5	44.7
Q9BY89	Q9BY89	30	30	30	Uncharacterized protein KIAA1671	KIAA1671	sp|Q9BY89|K1671_HUMAN Uncharacterized protein KIAA1671 OS=Homo sapiens OX=9606 GN=KIAA1671 PE=1 SV=2	1	30	30	30	17	15	13	0	1	0	15	14	14	17	15	13	0	1	0	15	14	14	17	15	13	0	1	0	15	14	14	23.4	23.4	23.4	196.71	1806	1806	0	63.862	14.5	11.6	10
O15145;C9JZD1;F8VR50	O15145;C9JZD1	5;3;2	5;3;2	5;3;2	Actin-related protein 2/3 complex subunit 3	ARPC3	sp|O15145|ARPC3_HUMAN Actin-related protein 2/3 complex subunit 3 OS=Homo sapiens OX=9606 GN=ARPC3 PE=1 SV=3;tr|C9JZD1|C9JZD1_HUMAN Actin related protein 2/3 complex subunit 3 (Fragment) OS=Homo sapiens OX=9606 GN=ARPC3 PE=1 SV=1	3	5	5	5	3	3	3	0	2	0	2	4	4	3	3	3	0	2	0	2	4	4	3	3	3	0	2	0	2	4	4	31.5	31.5	31.5	20.546	178	178;99;84	0	98.333	19.7	19.7	19.7
P35520;C9JMA6;H7C2H4;H7C1W6;H7C2W0	P35520	11;3;3;1;1	11;3;3;1;1	11;3;3;1;1	Cystathionine beta-synthase	CBS	sp|P35520|CBS_HUMAN Cystathionine beta-synthase OS=Homo sapiens OX=9606 GN=CBS PE=1 SV=2	5	11	11	11	10	10	9	0	0	0	0	0	0	10	10	9	0	0	0	0	0	0	10	10	9	0	0	0	0	0	0	22.9	22.9	22.9	60.586	551	551;177;224;149;159	0	34.021	21.1	21.4	19.2
E9PGZ1;E7EX44;Q05682;C9J813;A0A6Q8PGI1;C9JEK3	E9PGZ1;E7EX44;Q05682;C9J813	21;20;18;16;5;1	21;20;18;16;5;1	21;20;18;16;5;1	Caldesmon	CALD1	tr|E9PGZ1|E9PGZ1_HUMAN Caldesmon 1 OS=Homo sapiens OX=9606 GN=CALD1 PE=1 SV=1;tr|E7EX44|E7EX44_HUMAN Caldesmon 1 OS=Homo sapiens OX=9606 GN=CALD1 PE=1 SV=1;sp|Q05682|CALD1_HUMAN Caldesmon OS=Homo sapiens OX=9606 GN=CALD1 PE=1 SV=3;tr|C9J813|C9J813_HUMAN Ca	6	21	21	21	13	10	11	2	0	1	10	9	9	13	10	11	2	0	1	10	9	9	13	10	11	2	0	1	10	9	9	42	42	42	61.705	536	536;557;793;459;205;132	0	82.717	31.2	27.1	26.1
P63010;A0A087X253;A0A087WU93;A0A087WZQ6;Q10567;A0A087WYD1;C9J1E7;K7EN71;K7ERB2;A0A087WXS3;K7EKZ5;K7EJX1	P63010;A0A087X253;A0A087WU93;A0A087WZQ6;Q10567	12;11;6;6;6;5;4;2;2;1;1;1	12;11;6;6;6;5;4;2;2;1;1;1	12;11;6;6;6;5;4;2;2;1;1;1	AP-2 complex subunit beta;AP-1 complex subunit beta-1	AP2B1;AP1B1	sp|P63010|AP2B1_HUMAN AP-2 complex subunit beta OS=Homo sapiens OX=9606 GN=AP2B1 PE=1 SV=1;tr|A0A087X253|A0A087X253_HUMAN AP complex subunit beta OS=Homo sapiens OX=9606 GN=AP2B1 PE=1 SV=1;tr|A0A087WU93|A0A087WU93_HUMAN Adaptor related protein complex 2 su	12	12	12	12	8	8	8	1	0	1	2	4	6	8	8	8	1	0	1	2	4	6	8	8	8	1	0	1	2	4	6	14.5	14.5	14.5	104.55	937	937;913;663;677;949;639;578;132;151;49;63;80	0	18.619	10	9.4	9.7
O95782	O95782	16	16	9	AP-2 complex subunit alpha-1	AP2A1	sp|O95782|AP2A1_HUMAN AP-2 complex subunit alpha-1 OS=Homo sapiens OX=9606 GN=AP2A1 PE=1 SV=3	1	16	16	9	12	6	12	0	0	0	8	7	5	12	6	12	0	0	0	8	7	5	7	3	6	0	0	0	6	6	5	17.3	17.3	10.6	107.54	977	977	0	23.138	13.2	6.2	12.7
P05976;P08590	P05976;P08590	2;2	2;2	2;2	Myosin light chain 1/3, skeletal muscle isoform;Myosin light chain 3	MYL1;MYL3	sp|P05976|MYL1_HUMAN Myosin light chain 1/3, skeletal muscle isoform OS=Homo sapiens OX=9606 GN=MYL1 PE=1 SV=3;sp|P08590|MYL3_HUMAN Myosin light chain 3 OS=Homo sapiens OX=9606 GN=MYL3 PE=1 SV=3	2	2	2	2	2	2	2	0	1	1	1	2	2	2	2	2	0	1	1	1	2	2	2	2	2	0	1	1	1	2	2	8.2	8.2	8.2	21.145	194	194;195	0	44.838	8.2	8.2	8.2
P62701;C9JEH7;P22090;Q8TD47	P62701	11;5;5;4	11;5;5;4	11;5;5;4	40S ribosomal protein S4, X isoform	RPS4X	sp|P62701|RS4X_HUMAN 40S ribosomal protein S4, X isoform OS=Homo sapiens OX=9606 GN=RPS4X PE=1 SV=2	4	11	11	11	7	10	8	5	4	2	5	4	3	7	10	8	5	4	2	5	4	3	7	10	8	5	4	2	5	4	3	40.3	40.3	40.3	29.597	263	263;262;263;263	0	18.101	22.8	39.5	30
G3V4U5;G3V3J1;G3V5C8;G3V497;G3V4H6;G3V538;G3V500;G3V3N9;F8W717;A0A3B3IU69;O00423	G3V4U5;G3V3J1;G3V5C8;G3V497;G3V4H6;G3V538;G3V500;G3V3N9;F8W717;A0A3B3IU69;O00423	1;1;1;1;1;1;1;1;1;1;1	1;1;1;1;1;1;1;1;1;1;1	1;1;1;1;1;1;1;1;1;1;1	Echinoderm microtubule-associated protein-like 1	EML1	tr|G3V4U5|G3V4U5_HUMAN EMAP like 1 (Fragment) OS=Homo sapiens OX=9606 GN=EML1 PE=1 SV=1;tr|G3V3J1|G3V3J1_HUMAN EMAP like 1 OS=Homo sapiens OX=9606 GN=EML1 PE=1 SV=1;tr|G3V5C8|G3V5C8_HUMAN EMAP like 1 (Fragment) OS=Homo sapiens OX=9606 GN=EML1 PE=1 SV=1;tr|	11	1	1	1	1	1	1	0	1	0	1	1	1	1	1	1	0	1	0	1	1	1	1	1	1	0	1	0	1	1	1	16.5	16.5	16.5	9.3907	85	85;85;92;107;128;156;285;379;803;840;815	0.0039683	1.7705	16.5	16.5	16.5
Q69YQ0;A0A494C1J1;F8WAN1;C9J8U1;C9JLY8	Q69YQ0;A0A494C1J1;F8WAN1;C9J8U1	20;19;17;15;2	20;19;17;15;2	20;19;17;15;2	Cytospin-A	SPECC1L;SPECC1L-ADORA2A	sp|Q69YQ0|CYTSA_HUMAN Cytospin-A OS=Homo sapiens OX=9606 GN=SPECC1L PE=1 SV=3;tr|A0A494C1J1|A0A494C1J1_HUMAN Cytospin-A OS=Homo sapiens OX=9606 GN=SPECC1L PE=1 SV=1;tr|F8WAN1|F8WAN1_HUMAN Cytospin-A OS=Homo sapiens OX=9606 GN=SPECC1L-ADORA2A PE=3 SV=2;tr|C	5	20	20	20	9	11	13	0	0	0	9	10	10	9	11	13	0	0	0	9	10	10	9	11	13	0	0	0	9	10	10	20.6	20.6	20.6	124.54	1117	1117;1136;911;788;175	0	43.063	9	12.2	13.9
P61626;F8VV32;A0A0B4J259	P61626;F8VV32;A0A0B4J259	4;3;3	4;3;3	4;3;3	Lysozyme C;Lysozyme	LYZ	sp|P61626|LYSC_HUMAN Lysozyme C OS=Homo sapiens OX=9606 GN=LYZ PE=1 SV=1;tr|F8VV32|F8VV32_HUMAN Lysozyme OS=Homo sapiens OX=9606 GN=LYZ PE=1 SV=1;tr|A0A0B4J259|A0A0B4J259_HUMAN Lysozyme OS=Homo sapiens OX=9606 GN=LYZ PE=1 SV=1	3	4	4	4	1	0	1	2	2	1	2	2	2	1	0	1	2	2	1	2	2	2	1	0	1	2	2	1	2	2	2	25	25	25	16.537	148	148;104;137	0	5.5148	8.1	0	8.1
A0A7I2YQ77;A0A7I2V430;A0A7I2V4F0;Q92499;A0A087X2G1;A0A087WZ71;A0A7I2V2M5;A0A7I2V4J3;A0A7I2V421;A0A7I2V5X8;A0A7I2YQD0;A0A7I2V4Q0	A0A7I2YQ77;A0A7I2V430;A0A7I2V4F0;Q92499;A0A087X2G1;A0A087WZ71;A0A7I2V2M5;A0A7I2V4J3	11;11;11;11;10;10;10;8;5;4;2;2	11;11;11;11;10;10;10;8;5;4;2;2	11;11;11;11;10;10;10;8;5;4;2;2	ATP-dependent RNA helicase DDX1	DDX1	tr|A0A7I2YQ77|A0A7I2YQ77_HUMAN ATP-dependent RNA helicase OS=Homo sapiens OX=9606 GN=DDX1 PE=1 SV=1;tr|A0A7I2V430|A0A7I2V430_HUMAN ATP-dependent RNA helicase OS=Homo sapiens OX=9606 GN=DDX1 PE=1 SV=1;tr|A0A7I2V4F0|A0A7I2V4F0_HUMAN ATP-dependent RNA helicas	12	11	11	11	5	4	4	1	2	4	6	6	6	5	4	4	1	2	4	6	6	6	5	4	4	1	2	4	6	6	6	18.3	18.3	18.3	75.459	677	677;697;734;740;636;648;729;474;358;319;154;160	0	17.139	9.2	6.9	6.9
C9JTJ1;Q9Y6R6	C9JTJ1;Q9Y6R6	1;1	1;1	1;1	Zinc finger protein 780B	ZNF780B	tr|C9JTJ1|C9JTJ1_HUMAN Hypothetical BC331191_1, isoform CRA_c OS=Homo sapiens OX=9606 GN=ZNF780B PE=1 SV=1;sp|Q9Y6R6|Z780B_HUMAN Zinc finger protein 780B OS=Homo sapiens OX=9606 GN=ZNF780B PE=2 SV=1	2	1	1	1	1	0	0	0	0	0	1	0	1	1	0	0	0	0	0	1	0	1	1	0	0	0	0	0	1	0	1	1.3	1.3	1.3	79.359	685	685;833	1	-2	1.3	0	0
E7EV99;E7ENY0;P35611;A0A804HL01;H0Y9H2;D6RF25;D6RJE2;H0YFD8;D6RAH3;H0YG19;P35612	E7EV99;E7ENY0;P35611;A0A804HL01;H0Y9H2	13;13;13;12;9;3;2;2;2;1;1	13;13;13;12;9;3;2;2;2;1;1	13;13;13;12;9;3;2;2;2;1;1	Alpha-adducin	ADD1	tr|E7EV99|E7EV99_HUMAN Adducin 1 OS=Homo sapiens OX=9606 GN=ADD1 PE=1 SV=1;tr|E7ENY0|E7ENY0_HUMAN Adducin 1 OS=Homo sapiens OX=9606 GN=ADD1 PE=1 SV=1;sp|P35611|ADDA_HUMAN Alpha-adducin OS=Homo sapiens OX=9606 GN=ADD1 PE=1 SV=2;tr|A0A804HL01|A0A804HL01_HUMA	11	13	13	13	8	10	8	0	1	1	7	7	6	8	10	8	0	1	1	7	7	6	8	10	8	0	1	1	7	7	6	26.7	26.7	26.7	70.055	632	632;663;737;799;444;142;69;105;137;114;726	0	65.455	18.2	19.9	17.1
A0A7I2V5J8;E5RI98;A0A7I2V5S2;A0A7I2YQC0;P06748	A0A7I2V5J8;E5RI98;A0A7I2V5S2;A0A7I2YQC0;P06748	2;2;2;2;2	2;2;2;2;2	2;2;2;2;2	Nucleophosmin	NPM1	tr|A0A7I2V5J8|A0A7I2V5J8_HUMAN Nucleophosmin OS=Homo sapiens OX=9606 GN=NPM1 PE=1 SV=1;tr|E5RI98|E5RI98_HUMAN Nucleophosmin OS=Homo sapiens OX=9606 GN=NPM1 PE=1 SV=2;tr|A0A7I2V5S2|A0A7I2V5S2_HUMAN Nucleophosmin OS=Homo sapiens OX=9606 GN=NPM1 PE=1 SV=1;tr|	5	2	2	2	2	1	2	1	2	0	2	2	1	2	1	2	1	2	0	2	2	1	2	1	2	1	2	0	2	2	1	5.5	5.5	5.5	22.183	201	201;230;305;323;294	0	3.2315	5.5	5.5	5.5
P62424;Q5T8U2;Q5T8U3	P62424;Q5T8U2;Q5T8U3	6;4;4	6;4;4	6;4;4	60S ribosomal protein L7a	RPL7A	sp|P62424|RL7A_HUMAN 60S ribosomal protein L7a OS=Homo sapiens OX=9606 GN=RPL7A PE=1 SV=2;tr|Q5T8U2|Q5T8U2_HUMAN 60S ribosomal protein L7a OS=Homo sapiens OX=9606 GN=RPL7A PE=1 SV=1;tr|Q5T8U3|Q5T8U3_HUMAN 60S ribosomal protein L7a (Fragment) OS=Homo sapien	3	6	6	6	5	5	5	2	0	1	2	2	3	5	5	5	2	0	1	2	2	3	5	5	5	2	0	1	2	2	3	19.5	19.5	19.5	29.995	266	266;151;191	0	22.295	16.2	16.2	15.4
P08238;Q58FF8;F8W026;A0A7P0Z405;Q58FF7	P08238	14;4;2;2;2	9;1;2;2;1	7;1;0;0;1	Heat shock protein HSP 90-beta	HSP90AB1	sp|P08238|HS90B_HUMAN Heat shock protein HSP 90-beta OS=Homo sapiens OX=9606 GN=HSP90AB1 PE=1 SV=4	5	14	9	7	8	6	7	4	8	4	7	5	7	6	5	5	3	4	3	4	3	4	5	4	4	2	3	2	3	2	3	20.9	12.3	10.4	83.263	724	724;381;48;163;597	0	161.17	13	9.5	13
H7BYY1;F5H7S3;B7Z596;H0YKJ4;H0YK48;A0A494BZZ2;H0YKX5;Q6ZN40;A0A0S2Z4G6;P09493;H0YL42;A0A994J554;A0A494C0V8;H0YN06	H7BYY1;F5H7S3;B7Z596;H0YKJ4;H0YK48;A0A494BZZ2;H0YKX5;Q6ZN40;A0A0S2Z4G6;P09493	19;18;18;15;15;15;14;12;11;11;7;5;4;3	12;11;11;8;8;8;7;5;4;4;7;4;4;3	12;11;11;8;8;8;7;5;4;4;7;4;4;3	Tropomyosin alpha-1 chain	TPM1	tr|H7BYY1|H7BYY1_HUMAN Tropomyosin 1 OS=Homo sapiens OX=9606 GN=TPM1 PE=1 SV=1;tr|F5H7S3|F5H7S3_HUMAN Tropomyosin 1 OS=Homo sapiens OX=9606 GN=TPM1 PE=1 SV=2;tr|B7Z596|B7Z596_HUMAN Tropomyosin 1 OS=Homo sapiens OX=9606 GN=TPM1 PE=1 SV=1;tr|H0YKJ4|H0YKJ4_HU	14	19	12	12	14	15	14	2	2	2	8	9	6	8	9	9	0	0	0	4	5	3	8	9	9	0	0	0	4	5	3	52.8	38.7	38.7	28.747	248	248;245;275;248;248;251;142;326;284;284;108;180;155;49	0	63.837	42.7	46.8	45.2
J3QQ67;Q07020;G3V203;H0YHA7;F8VYV2;F8VUA6;A0A075B7A0;F8VXR6	J3QQ67;Q07020;G3V203;H0YHA7;F8VYV2;F8VUA6;A0A075B7A0	7;7;6;6;5;4;4;1	7;7;6;6;5;4;4;1	7;7;6;6;5;4;4;1	60S ribosomal protein L18	RPL18	tr|J3QQ67|J3QQ67_HUMAN Ribosomal protein L18 (Fragment) OS=Homo sapiens OX=9606 GN=RPL18 PE=1 SV=1;sp|Q07020|RL18_HUMAN 60S ribosomal protein L18 OS=Homo sapiens OX=9606 GN=RPL18 PE=1 SV=2;tr|G3V203|G3V203_HUMAN Ribosomal protein L18 OS=Homo sapiens OX=960	8	7	7	7	4	3	6	1	0	0	2	3	5	4	3	6	1	0	0	2	3	5	4	3	6	1	0	0	2	3	5	36.8	36.8	36.8	21.728	190	190;188;164;167;133;130;138;84	0	124.45	23.7	19.5	30
A0A0G2JLI4;J3KTA4;P17844;A0A7I2V5F5;A0A7I2V507;A0A7I2V2S0;J3KRZ1;J3QSF1;J3QRQ7;A0A0U1RQJ0	A0A0G2JLI4;J3KTA4;P17844;A0A7I2V5F5;A0A7I2V507;A0A7I2V2S0;J3KRZ1	13;13;13;9;9;9;7;5;3;1	12;12;12;8;8;8;6;4;3;1	7;7;7;4;4;4;3;3;1;0	Probable ATP-dependent RNA helicase DDX5	DDX5	tr|A0A0G2JLI4|A0A0G2JLI4_HUMAN Probable ATP-dependent RNA helicase DDX5 OS=Homo sapiens OX=9606 GN=DDX5 PE=1 SV=2;tr|J3KTA4|J3KTA4_HUMAN Probable ATP-dependent RNA helicase DDX5 OS=Homo sapiens OX=9606 GN=DDX5 PE=1 SV=1;sp|P17844|DDX5_HUMAN Probable ATP-de	10	13	12	7	9	4	8	1	3	1	7	9	8	8	3	7	1	2	1	6	8	7	6	2	4	0	1	0	2	5	4	28.3	26.1	15.5	57.162	509	509;614;614;347;406;416;166;153;212;56	0	15.39	19.3	9	17.7
P04406;E7EUT5;O14556	P04406;E7EUT5	8;6;1	8;6;1	8;6;1	Glyceraldehyde-3-phosphate dehydrogenase	GAPDH	sp|P04406|G3P_HUMAN Glyceraldehyde-3-phosphate dehydrogenase OS=Homo sapiens OX=9606 GN=GAPDH PE=1 SV=3;tr|E7EUT5|E7EUT5_HUMAN Glyceraldehyde-3-phosphate dehydrogenase OS=Homo sapiens OX=9606 GN=GAPDH PE=1 SV=1	3	8	8	8	4	4	3	5	4	2	2	3	4	4	4	3	5	4	2	2	3	4	4	4	3	5	4	2	2	3	4	30.1	30.1	30.1	36.053	335	335;260;408	0	34.798	15.8	17	11.9
M0QXB0;V9GZ56;Q9Y4Z0	M0QXB0;V9GZ56;Q9Y4Z0	1;1;1	1;1;1	1;1;1	U6 snRNA-associated Sm-like protein LSm4	LSM4	tr|M0QXB0|M0QXB0_HUMAN U6 snRNA-associated Sm-like protein LSm4 OS=Homo sapiens OX=9606 GN=LSM4 PE=1 SV=1;tr|V9GZ56|V9GZ56_HUMAN U6 snRNA-associated Sm-like protein LSm4 (Fragment) OS=Homo sapiens OX=9606 GN=LSM4 PE=1 SV=1;sp|Q9Y4Z0|LSM4_HUMAN U6 snRNA-ass	3	1	1	1	0	1	1	0	0	0	1	0	1	0	1	1	0	0	0	1	0	1	0	1	1	0	0	0	1	0	1	10.1	10.1	10.1	7.8299	69	69;238;139	0	6.6375	0	10.1	10.1
Q9BQE3;P68363;Q71U36;F5H5D3;P0DPH7;P0DPH8;Q6PEY2;P68366;F8VVB9;Q9NY65;C9J2C0;A0A7P0T945;F8VQQ4;A0A7P0TA31;F8VX09;F8VWV9;F8VRZ4;F8VS66;C9JJQ8;C9JQ00;A0A7P0Z4A1;F8W0F6;F8VRK0;V9GZ17;C9JDL2;C9JEV8;C9JDS9;A6NHL2;C9K0S6	Q9BQE3;P68363;Q71U36;F5H5D3;P0DPH7;P0DPH8;Q6PEY2;P68366;F8VVB9;Q9NY65;C9J2C0;A0A7P0T945;F8VQQ4	6;6;6;6;5;5;4;4;3;3;3;3;3;2;2;2;2;2;1;1;1;1;1;1;1;1;1;1;1	6;6;6;6;5;5;4;4;3;3;3;3;3;2;2;2;2;2;1;1;1;1;1;1;1;1;1;1;1	6;6;6;6;5;5;4;4;3;3;3;3;3;2;2;2;2;2;1;1;1;1;1;1;1;1;1;1;1	Tubulin alpha-1C chain;Tubulin alpha-1B chain;Tubulin alpha-1A chain;Tubulin alpha-3E chain;Tubulin alpha-4A chain;Tubulin alpha-8 chain	TUBA1C;TUBA1B;TUBA1A;TUBA3E;TUBA4A;TUBA8	sp|Q9BQE3|TBA1C_HUMAN Tubulin alpha-1C chain OS=Homo sapiens OX=9606 GN=TUBA1C PE=1 SV=1;sp|P68363|TBA1B_HUMAN Tubulin alpha-1B chain OS=Homo sapiens OX=9606 GN=TUBA1B PE=1 SV=1;sp|Q71U36|TBA1A_HUMAN Tubulin alpha-1A chain OS=Homo sapiens OX=9606 GN=TUBA1A	29	6	6	6	3	3	4	2	3	3	3	4	3	3	3	4	2	3	3	3	4	3	3	3	4	2	3	3	3	4	3	20.5	20.5	20.5	49.895	449	449;451;451;519;450;450;450;448;246;449;467;426;219;314;75;81;112;130;198;180;188;231;49;275;119;153;156;446;47	0	12.328	11.4	11.4	12.7
O75874;C9J4N6	O75874	7;3	7;3	7;3	Isocitrate dehydrogenase [NADP] cytoplasmic	IDH1	sp|O75874|IDHC_HUMAN Isocitrate dehydrogenase [NADP] cytoplasmic OS=Homo sapiens OX=9606 GN=IDH1 PE=1 SV=2	2	7	7	7	5	4	6	3	6	4	4	3	4	5	4	6	3	6	4	4	3	4	5	4	6	3	6	4	4	3	4	19.3	19.3	19.3	46.659	414	414;157	0	12.925	13.8	11.1	16.2
H0YLF3;F5H6I0;P61769	H0YLF3;F5H6I0;P61769	2;2;2	2;2;2	2;2;2	Beta-2-microglobulin;Beta-2-microglobulin form pI 5.3	B2M	tr|H0YLF3|H0YLF3_HUMAN Beta-2-microglobulin (Fragment) OS=Homo sapiens OX=9606 GN=B2M PE=1 SV=1;tr|F5H6I0|F5H6I0_HUMAN Beta-2-microglobulin OS=Homo sapiens OX=9606 GN=B2M PE=1 SV=2;sp|P61769|B2MG_HUMAN Beta-2-microglobulin OS=Homo sapiens OX=9606 GN=B2M PE	3	2	2	2	1	1	1	2	2	1	2	2	2	1	1	1	2	2	1	2	2	2	1	1	1	2	2	1	2	2	2	28.2	28.2	28.2	8.4984	71	71;101;119	0	6.1401	14.1	14.1	14.1
Q5T9A4;A0A5K1VW56;H0Y2W2;J3QSF3	Q5T9A4	9;4;3;1	3;1;1;1	1;0;1;0	ATPase family AAA domain-containing protein 3B	ATAD3B	sp|Q5T9A4|ATD3B_HUMAN ATPase family AAA domain-containing protein 3B OS=Homo sapiens OX=9606 GN=ATAD3B PE=1 SV=1	4	9	3	1	5	4	3	2	2	2	3	6	4	2	1	0	1	0	0	0	2	0	1	0	0	0	0	0	0	1	0	14.4	4.8	1.9	72.572	648	648;298;139;131	0	2.9347	8.5	7.1	4.6
A0A1W2PNV4;C9JEY1;C9K057;E9PF58;F8VXW2;C9JBJ7;C9JTT6	A0A1W2PNV4;C9JEY1;C9K057	12;7;7;5;4;2;1	12;7;7;5;4;2;1	0;0;0;0;0;0;0		ARPC1B	tr|A0A1W2PNV4|A0A1W2PNV4_HUMAN Actin-related protein 2/3 complex subunit 1A OS=Homo sapiens OX=9606 PE=3 SV=1;tr|C9JEY1|C9JEY1_HUMAN Actin related protein 2/3 complex subunit 1B (Fragment) OS=Homo sapiens OX=9606 GN=ARPC1B PE=1 SV=2;tr|C9K057|C9K057_HUMAN	7	12	12	0	10	9	11	0	0	0	3	4	2	10	9	11	0	0	0	3	4	2	0	0	0	0	0	0	0	0	0	23.4	23.4	0	75.872	684	684;334;352;279;130;102;82	0	41.321	18.4	18.4	20.9
E5RFN6;Q8WWZ4	E5RFN6;Q8WWZ4	1;1	1;1	1;1	ATP-binding cassette sub-family A member 10	ABCA10	tr|E5RFN6|E5RFN6_HUMAN ATP binding cassette subfamily A member 10 OS=Homo sapiens OX=9606 GN=ABCA10 PE=1 SV=1;sp|Q8WWZ4|ABCAA_HUMAN ATP-binding cassette sub-family A member 10 OS=Homo sapiens OX=9606 GN=ABCA10 PE=2 SV=3	2	1	1	1	1	1	1	1	0	1	1	1	1	1	1	1	1	0	1	1	1	1	1	1	1	1	0	1	1	1	1	0.7	0.7	0.7	150.86	1326	1326;1543	0	25.124	0.7	0.7	0.7
P26373;J3QSB4;H3BTH3;H3BUK8;J3KS98	P26373;J3QSB4	8;6;2;1;1	8;6;2;1;1	8;6;2;1;1	60S ribosomal protein L13	RPL13	sp|P26373|RL13_HUMAN 60S ribosomal protein L13 OS=Homo sapiens OX=9606 GN=RPL13 PE=1 SV=4;tr|J3QSB4|J3QSB4_HUMAN 60S ribosomal protein L13 (Fragment) OS=Homo sapiens OX=9606 GN=RPL13 PE=1 SV=1	5	8	8	8	7	3	5	2	1	0	3	5	5	7	3	5	2	1	0	3	5	5	7	3	5	2	1	0	3	5	5	32.2	32.2	32.2	24.261	211	211;126;63;54;78	0	43.494	31.8	16.1	25.1
A0A3B3IRI3;A0A3B3ITE1;A0A1B0GTW1;A0A2R8YDH4;Q9UDY2;A0A3B3ISZ5;A0A3B3ISF1;A0A3B3IU51;A0A3B3IRV6;A0A3B3IT83;A0A3B3IS03	A0A3B3IRI3;A0A3B3ITE1;A0A1B0GTW1;A0A2R8YDH4;Q9UDY2;A0A3B3ISZ5;A0A3B3ISF1;A0A3B3IU51;A0A3B3IRV6;A0A3B3IT83;A0A3B3IS03	16;16;16;16;16;15;13;13;12;10;9	16;16;16;16;16;15;13;13;12;10;9	16;16;16;16;16;15;13;13;12;10;9	Tight junction protein ZO-2	TJP2	tr|A0A3B3IRI3|A0A3B3IRI3_HUMAN Tight junction protein 2 OS=Homo sapiens OX=9606 GN=TJP2 PE=1 SV=1;tr|A0A3B3ITE1|A0A3B3ITE1_HUMAN Tight junction protein 2 (Fragment) OS=Homo sapiens OX=9606 GN=TJP2 PE=1 SV=1;tr|A0A1B0GTW1|A0A1B0GTW1_HUMAN Tight junction pro	11	16	16	16	13	8	13	0	1	0	5	6	10	13	8	13	0	1	0	5	6	10	13	8	13	0	1	0	5	6	10	15.9	15.9	15.9	126.95	1128	1128;1191;1249;1319;1190;1099;989;1047;851;621;652	0	35.994	13.3	7.6	13.2
P36578;H3BM89;H3BTP7;H3BU31	P36578;H3BM89	11;7;5;5	11;7;5;5	11;7;5;5	60S ribosomal protein L4	RPL4	sp|P36578|RL4_HUMAN 60S ribosomal protein L4 OS=Homo sapiens OX=9606 GN=RPL4 PE=1 SV=5;tr|H3BM89|H3BM89_HUMAN 60S ribosomal protein L4 OS=Homo sapiens OX=9606 GN=RPL4 PE=1 SV=1	4	11	11	11	4	4	10	1	1	1	2	3	3	4	4	10	1	1	1	2	3	3	4	4	10	1	1	1	2	3	3	27.6	27.6	27.6	47.697	427	427;333;170;171	0	19.84	12.2	10.3	27.6
A0A6Q8PFE4	A0A6Q8PFE4	28	1	0			tr|A0A6Q8PFE4|A0A6Q8PFE4_HUMAN Actin beta OS=Homo sapiens OX=9606 GN=ACTB PE=1 SV=1	1	28	1	0	26	23	24	13	16	15	19	20	20	1	1	1	1	1	0	1	1	1	0	0	0	0	0	0	0	0	0	81	2.1	0	37.34	332	332	1	-2	79.5	64.8	66
P62249;M0R3H0;M0R210;M0R1M5;M0QX76;Q6IPX4	P62249;M0R3H0;M0R210;M0R1M5;M0QX76	7;6;6;5;4;3	7;6;6;5;4;3	7;6;6;5;4;3	40S ribosomal protein S16	RPS16	sp|P62249|RS16_HUMAN 40S ribosomal protein S16 OS=Homo sapiens OX=9606 GN=RPS16 PE=1 SV=2;tr|M0R3H0|M0R3H0_HUMAN Ribosomal protein S16 OS=Homo sapiens OX=9606 GN=RPS16 PE=1 SV=1;tr|M0R210|M0R210_HUMAN Ribosomal protein S16 OS=Homo sapiens OX=9606 GN=RPS16	6	7	7	7	3	5	5	3	6	5	4	1	4	3	5	5	3	6	5	4	1	4	3	5	5	3	6	5	4	1	4	45.2	45.2	45.2	16.445	146	146;100;129;85;50;152	0	13.234	24	36.3	36.3
P18124;A8MUD9;C9JIJ5;C9JZ88	P18124;A8MUD9	9;8;3;2	9;8;3;2	9;8;3;2	60S ribosomal protein L7	RPL7	sp|P18124|RL7_HUMAN 60S ribosomal protein L7 OS=Homo sapiens OX=9606 GN=RPL7 PE=1 SV=1;tr|A8MUD9|A8MUD9_HUMAN Ribosomal protein L7 OS=Homo sapiens OX=9606 GN=RPL7 PE=1 SV=1	4	9	9	9	4	5	7	2	2	2	2	2	2	4	5	7	2	2	2	2	2	2	4	5	7	2	2	2	2	2	2	42.7	42.7	42.7	29.225	248	248;208;99;88	0	25.522	20.2	25.8	32.7
Q9Y4I1;F8WE88;A0A8J8YWI7;A0A8I5KTF1;G3V394;A0A8I5KYM3;A0A8I5QKS7;A0A8I5KWE1;A0A8I5QKR9;E7ERV5;A0A8I5KUG0;A0A8I5KRA4;A0A8I5KYS5;A0A8I5QJE6;A0A8I5KV14;A0A8I5KX10;A0A8I5QJA8;A0A8I5QJF6;H0Y3R0;A0A8I5KRS2;A0A8I5KXP8;A0A8I5KXW9;A0A8I5KRL5;A0A8I5KQ70;A0A8I5KVK9;A0A8I5KXS5	Q9Y4I1;F8WE88;A0A8J8YWI7;A0A8I5KTF1;G3V394;A0A8I5KYM3;A0A8I5QKS7;A0A8I5KWE1;A0A8I5QKR9	27;27;27;27;26;20;15;15;15;9;8;8;8;8;8;8;8;5;5;4;3;3;2;1;1;1	27;27;27;27;26;20;15;15;15;9;8;8;8;8;8;8;8;5;5;4;3;3;2;1;1;1	24;24;24;24;23;17;15;15;15;9;6;6;6;8;8;8;8;4;5;3;3;3;1;0;0;0	Unconventional myosin-Va	MYO5A	sp|Q9Y4I1|MYO5A_HUMAN Unconventional myosin-Va OS=Homo sapiens OX=9606 GN=MYO5A PE=1 SV=2;tr|F8WE88|F8WE88_HUMAN Unconventional myosin-Va OS=Homo sapiens OX=9606 GN=MYO5A PE=1 SV=2;tr|A0A8J8YWI7|A0A8J8YWI7_HUMAN Myosin VA OS=Homo sapiens OX=9606 GN=MYO5A P	26	27	27	24	12	11	19	0	0	0	7	13	9	12	11	19	0	0	0	7	13	9	10	10	16	0	0	0	6	12	8	15.4	15.4	13.5	215.4	1855	1855;1855;1853;1852;1841;1317;1064;1062;1040;722;672;694;678;577;546;509;499;356;267;355;143;195;105;228;205;196	0	43.771	7.3	6.4	10.7
P35221;G3XAM7;P26232;A0A0A0MRI5;E5RIB1;E5RJ41;E5RGY7;E5RG03;A0A804HI07;A0A0A0MTJ6;E5RJZ2;E5RIT8;H0YBB8;E5RHV7;E5RIE0;E5RJL0;E5RFM3;Q9UI47;E5RGY6	P35221;G3XAM7	13;11;4;3;3;2;2;1;1;1;1;1;1;1;1;1;1;1;1	13;11;4;3;3;2;2;1;1;1;1;1;1;1;1;1;1;1;1	13;11;4;3;3;2;2;1;1;1;1;1;1;1;1;1;1;1;1	Catenin alpha-1	CTNNA1	sp|P35221|CTNA1_HUMAN Catenin alpha-1 OS=Homo sapiens OX=9606 GN=CTNNA1 PE=1 SV=1;tr|G3XAM7|G3XAM7_HUMAN Catenin (Cadherin-associated protein), alpha 1, 102kDa, isoform CRA_a OS=Homo sapiens OX=9606 GN=CTNNA1 PE=1 SV=1	19	13	13	13	9	10	10	0	0	0	5	5	7	9	10	10	0	0	0	5	5	7	9	10	10	0	0	0	5	5	7	16.8	16.8	16.8	100.07	906	906;841;953;569;215;161;136;156;828;476;37;55;129;123;117;101;94;895;139	0	255.76	11.1	13.7	12.4
Q9NZI8	Q9NZI8	11	11	9	Insulin-like growth factor 2 mRNA-binding protein 1	IGF2BP1	sp|Q9NZI8|IF2B1_HUMAN Insulin-like growth factor 2 mRNA-binding protein 1 OS=Homo sapiens OX=9606 GN=IGF2BP1 PE=1 SV=2	1	11	11	9	1	1	1	5	3	1	9	8	8	1	1	1	5	3	1	9	8	8	0	1	0	5	2	1	7	7	7	25.5	25.5	21.5	63.48	577	577	0	41.321	2.3	2.9	2.3
O00391;A8MXT8	O00391	6;1	6;1	6;1	Sulfhydryl oxidase 1	QSOX1	sp|O00391|QSOX1_HUMAN Sulfhydryl oxidase 1 OS=Homo sapiens OX=9606 GN=QSOX1 PE=1 SV=3	2	6	6	6	4	4	3	5	2	2	4	4	3	4	4	3	5	2	2	4	4	3	4	4	3	5	2	2	4	4	3	9.5	9.5	9.5	82.577	747	747;155	0	34.591	4.6	4.6	4.4
P20142;A2A3L9;Q4VXA6	P20142;A2A3L9;Q4VXA6	3;2;2	3;2;2	3;2;2	Gastricsin	PGC	sp|P20142|PEPC_HUMAN Gastricsin OS=Homo sapiens OX=9606 GN=PGC PE=1 SV=1;tr|A2A3L9|A2A3L9_HUMAN Progastricsin (Fragment) OS=Homo sapiens OX=9606 GN=PGC PE=1 SV=1;tr|Q4VXA6|Q4VXA6_HUMAN Progastricsin (Fragment) OS=Homo sapiens OX=9606 GN=PGC PE=1 SV=8	3	3	3	3	2	2	1	1	2	1	1	1	1	2	2	1	1	2	1	1	1	1	2	2	1	1	2	1	1	1	1	7.5	7.5	7.5	42.425	388	388;86;139	0	3.9325	5.2	5.2	3.1
D6RAF8;H0Y8G5;A0A994J4R1;Q14103;D6RF44;H0YA96;A0A994J440;D6RD83;D6RBQ9	D6RAF8;H0Y8G5;A0A994J4R1;Q14103;D6RF44;H0YA96;A0A994J440;D6RD83;D6RBQ9	4;4;4;4;3;3;3;2;2	4;4;4;4;3;3;3;2;2	4;4;4;4;3;3;3;2;2	Heterogeneous nuclear ribonucleoprotein D0	HNRNPD	tr|D6RAF8|D6RAF8_HUMAN Heterogeneous nuclear ribonucleoprotein D OS=Homo sapiens OX=9606 GN=HNRNPD PE=1 SV=1;tr|H0Y8G5|H0Y8G5_HUMAN Heterogeneous nuclear ribonucleoprotein D (Fragment) OS=Homo sapiens OX=9606 GN=HNRNPD PE=1 SV=8;tr|A0A994J4R1|A0A994J4R1_HU	9	4	4	4	1	1	2	2	3	2	2	1	4	1	1	2	2	3	2	2	1	4	1	1	2	2	3	2	2	1	4	22.2	22.2	22.2	23.076	221	221;260;304;355;111;210;257;92;155	0	6.2401	6.3	6.3	10.9
E9PRZ4	E9PRZ4	1	1	1		C11orf85	tr|E9PRZ4|E9PRZ4_HUMAN Membrane anchored junction protein OS=Homo sapiens OX=9606 GN=MAJIN PE=1 SV=1	1	1	1	1	0	1	1	1	1	1	0	0	0	0	1	1	1	1	1	0	0	0	0	1	1	1	1	1	0	0	0	9.6	9.6	9.6	13.466	114	114	0.0021413	2.2121	0	9.6	9.6
P27694;I3L4R8	P27694;I3L4R8	14;8	14;8	14;8	Replication protein A 70 kDa DNA-binding subunit;Replication protein A 70 kDa DNA-binding subunit, N-terminally processed	RPA1	sp|P27694|RFA1_HUMAN Replication protein A 70 kDa DNA-binding subunit OS=Homo sapiens OX=9606 GN=RPA1 PE=1 SV=2;tr|I3L4R8|I3L4R8_HUMAN Replication protein A1 (Fragment) OS=Homo sapiens OX=9606 GN=RPA1 PE=1 SV=1	2	14	14	14	12	5	7	0	0	0	1	1	1	12	5	7	0	0	0	1	1	1	12	5	7	0	0	0	1	1	1	25.3	25.3	25.3	68.137	616	616;313	0	41.664	21.6	9.7	11.5
P47755;F8W9N7;C9JUG7	P47755;F8W9N7;C9JUG7	6;4;3	4;3;2	4;3;2	F-actin-capping protein subunit alpha-2	CAPZA2	sp|P47755|CAZA2_HUMAN F-actin-capping protein subunit alpha-2 OS=Homo sapiens OX=9606 GN=CAPZA2 PE=1 SV=3;tr|F8W9N7|F8W9N7_HUMAN F-actin-capping protein subunit alpha OS=Homo sapiens OX=9606 GN=CAPZA2 PE=1 SV=1;tr|C9JUG7|C9JUG7_HUMAN F-actin-capping protei	3	6	4	4	5	4	5	2	2	1	2	3	3	3	2	3	1	1	0	1	2	2	3	2	3	1	1	0	1	2	2	25.9	19.9	19.9	32.949	286	286;174;146	0	49.633	20.6	13.6	18.9
Q9BUP0;H7C0I0;C9JTV4;Q8WYH2	Q9BUP0	9;4;3;3	8;4;2;2	8;4;2;2	EF-hand domain-containing protein D1	EFHD1	sp|Q9BUP0|EFHD1_HUMAN EF-hand domain-containing protein D1 OS=Homo sapiens OX=9606 GN=EFHD1 PE=1 SV=1	4	9	8	8	6	6	7	0	0	0	6	3	3	5	5	6	0	0	0	5	2	2	5	5	6	0	0	0	5	2	2	48.1	43.5	43.5	26.927	239	239;99;81;127	0	54.369	39.3	31.8	41
P12814;A0A804HJU8;A0A804HII9;A0A804HK61;A0A804HLD0;A0A7I2V4Y4;A0A804HLF4;A0A804HKE2;H9KV75;A0A804HL31;A0A804HIN7;H7C5W8;G3V2N5;G3V2W4;A0A804HJQ9;H0YJ11;H0YJW3;A0A804HJN7;G3V2X9	P12814;A0A804HJU8;A0A804HII9;A0A804HK61;A0A804HLD0;A0A7I2V4Y4;A0A804HLF4;A0A804HKE2;H9KV75;A0A804HL31;A0A804HIN7	22;22;22;22;21;21;21;21;20;20;19;8;7;7;6;5;5;4;3	10;10;10;10;9;10;9;10;10;10;9;4;3;3;2;2;2;2;1	10;10;10;10;9;10;9;10;10;10;9;4;3;3;2;2;2;2;1	Alpha-actinin-1	ACTN1	sp|P12814|ACTN1_HUMAN Alpha-actinin-1 OS=Homo sapiens OX=9606 GN=ACTN1 PE=1 SV=2;tr|A0A804HJU8|A0A804HJU8_HUMAN Actinin alpha 1 OS=Homo sapiens OX=9606 GN=ACTN1 PE=1 SV=1;tr|A0A804HII9|A0A804HII9_HUMAN Actinin alpha 1 OS=Homo sapiens OX=9606 GN=ACTN1 PE=1	19	22	10	10	18	13	19	2	2	0	10	11	7	6	5	8	0	1	0	6	7	4	6	5	8	0	1	0	6	7	4	28.3	14.9	14.9	103.06	892	892;874;913;886;903;895;826;922;822;827;883;297;260;238;268;207;251;210;144	0	30.797	22.6	16.6	24.2
Q02878;F8VZ45;U3KQR5;F8VR69;F8VZA3;F8VWR1;F8VU16	Q02878	8;3;3;2;1;1;1	8;3;3;2;1;1;1	8;3;3;2;1;1;1	60S ribosomal protein L6	RPL6	sp|Q02878|RL6_HUMAN 60S ribosomal protein L6 OS=Homo sapiens OX=9606 GN=RPL6 PE=1 SV=3	7	8	8	8	7	5	8	2	1	0	2	2	1	7	5	8	2	1	0	2	2	1	7	5	8	2	1	0	2	2	1	26	26	26	32.728	288	288;159;160;63;105;118;120	0	13.218	25.7	19.1	26
H0Y6E7;H3BT71;P38159;H3BR27;Q96E39;A0A1B0GUK8;O75526;H3BNC1;H3BUY5;Q8N7X1	H0Y6E7;H3BT71;P38159;H3BR27;Q96E39	5;5;5;3;3;2;2;1;1;1	5;5;5;3;3;2;2;1;1;1	5;5;5;3;3;2;2;1;1;1	RNA-binding motif protein, X chromosome;RNA-binding motif protein, X chromosome, N-terminally processed;RNA binding motif protein, X-linked-like-1	RBMX;RBMXL1	tr|H0Y6E7|H0Y6E7_HUMAN RNA binding motif protein X-linked (Fragment) OS=Homo sapiens OX=9606 GN=RBMX PE=1 SV=2;tr|H3BT71|H3BT71_HUMAN RNA binding motif protein X-linked OS=Homo sapiens OX=9606 GN=RBMX PE=1 SV=1;sp|P38159|RBMX_HUMAN RNA-binding motif protei	10	5	5	5	3	3	5	2	3	2	4	4	3	3	3	5	2	3	2	4	4	3	3	3	5	2	3	2	4	4	3	21.2	21.2	21.2	31.745	292	292;296;391;78;390;158;392;37;263;1067	0	7.9705	11.6	11.6	21.2
P09874;A0A7I2V3E1;A0A7I2V5E9;A0A7I2V625;A0A7I2V384	P09874;A0A7I2V3E1	15;14;6;6;1	15;14;6;6;1	15;14;6;6;1	Poly [ADP-ribose] polymerase 1	PARP1	sp|P09874|PARP1_HUMAN Poly [ADP-ribose] polymerase 1 OS=Homo sapiens OX=9606 GN=PARP1 PE=1 SV=4;tr|A0A7I2V3E1|A0A7I2V3E1_HUMAN Poly [ADP-ribose] polymerase OS=Homo sapiens OX=9606 GN=PARP1 PE=1 SV=1	5	15	15	15	10	6	10	0	0	0	4	3	3	10	6	10	0	0	0	4	3	3	10	6	10	0	0	0	4	3	3	19.7	19.7	19.7	113.08	1014	1014;971;308;369;100	0	22.989	12.6	6.7	12.5
B4DY09;Q12905;X6R6Z1;A0A0A0MRL0	B4DY09;Q12905	9;9;3;2	9;9;3;2	9;9;3;2	Interleukin enhancer-binding factor 2	ILF2	tr|B4DY09|B4DY09_HUMAN Interleukin enhancer binding factor 2 OS=Homo sapiens OX=9606 GN=ILF2 PE=1 SV=1;sp|Q12905|ILF2_HUMAN Interleukin enhancer-binding factor 2 OS=Homo sapiens OX=9606 GN=ILF2 PE=1 SV=2	4	9	9	9	4	4	4	2	3	2	3	4	3	4	4	4	2	3	2	3	4	3	4	4	4	2	3	2	3	4	3	30.1	30.1	30.1	38.91	352	352;390;115;150	0	21.326	14.8	13.9	14.5
P01857;A0A0A0MS07	P01857;A0A0A0MS07	3;2	2;1	2;1	Ig gamma-1 chain C region	IGHG1	sp|P01857|IGHG1_HUMAN Immunoglobulin heavy constant gamma 1 OS=Homo sapiens OX=9606 GN=IGHG1 PE=1 SV=2;tr|A0A0A0MS07|A0A0A0MS07_HUMAN Immunoglobulin heavy constant gamma 1 (Fragment) OS=Homo sapiens OX=9606 GN=IGHG1 PE=1 SV=1	2	3	2	2	2	2	2	1	3	2	2	2	2	1	1	1	1	2	1	1	1	1	1	1	1	1	2	1	1	1	1	8.3	6.5	6.5	43.911	399	399;295	0	5.5782	4.8	4.8	4.8
A0A6I8PIS1;Q00796;H0YKB3;A0A6I8PRA7	A0A6I8PIS1;Q00796;H0YKB3	6;6;3;1	6;6;3;1	6;6;3;1	Sorbitol dehydrogenase	SORD	tr|A0A6I8PIS1|A0A6I8PIS1_HUMAN Sorbitol dehydrogenase OS=Homo sapiens OX=9606 GN=SORD PE=1 SV=1;sp|Q00796|DHSO_HUMAN Sorbitol dehydrogenase OS=Homo sapiens OX=9606 GN=SORD PE=1 SV=4;tr|H0YKB3|H0YKB3_HUMAN Sorbitol dehydrogenase OS=Homo sapiens OX=9606 GN=S	4	6	6	6	2	3	3	3	4	1	3	2	4	2	3	3	3	4	1	3	2	4	2	3	3	3	4	1	3	2	4	33.7	33.7	33.7	27.076	252	252;357;117;25	0	8.5506	11.5	18.3	14.7
P49411;H3BNU3	P49411	10;2	10;2	10;2	Elongation factor Tu, mitochondrial	TUFM	sp|P49411|EFTU_HUMAN Elongation factor Tu, mitochondrial OS=Homo sapiens OX=9606 GN=TUFM PE=1 SV=3	2	10	10	10	4	8	6	3	4	2	5	3	3	4	8	6	3	4	2	5	3	3	4	8	6	3	4	2	5	3	3	27.9	27.9	27.9	49.874	455	455;101	0	18.565	12.1	22.9	18.2
A0A2R8Y793;G5E9R0;A0A6Q8PH58;A0A2R8YGF8;C9JUM1;C9JZR7;C9JTX5;A0A2R8YEA7;F8WCH0;A0A6Q8PGD7	A0A2R8Y793;G5E9R0;A0A6Q8PH58;A0A2R8YGF8	27;14;14;14;12;12;10;8;3;2	1;0;0;0;0;0;0;0;0;0	1;0;0;0;0;0;0;0;0;0		ACTB	tr|A0A2R8Y793|A0A2R8Y793_HUMAN Actin beta (Fragment) OS=Homo sapiens OX=9606 GN=ACTB PE=1 SV=1;tr|G5E9R0|G5E9R0_HUMAN Actin beta OS=Homo sapiens OX=9606 GN=ACTB PE=1 SV=1;tr|A0A6Q8PH58|A0A6Q8PH58_HUMAN Actin beta OS=Homo sapiens OX=9606 GN=ACTB PE=1 SV=1;t	10	27	1	1	26	23	23	14	14	15	17	17	17	1	1	1	0	0	0	0	1	1	1	1	1	0	0	0	0	1	1	91.6	3.2	3.2	34.141	309	309;125;151;165;96;102;80;157;52;40	0.0020619	2.0112	90	74.1	75.4
P39023;G5E9G0;B5MCW2;H7C422;F8WCR1;H7C3M2;Q92901	P39023;G5E9G0;B5MCW2;H7C422	8;6;5;5;3;3;1	8;6;5;5;3;3;1	8;6;5;5;3;3;1	60S ribosomal protein L3	RPL3	sp|P39023|RL3_HUMAN 60S ribosomal protein L3 OS=Homo sapiens OX=9606 GN=RPL3 PE=1 SV=2;tr|G5E9G0|G5E9G0_HUMAN Ribosomal protein L3 OS=Homo sapiens OX=9606 GN=RPL3 PE=1 SV=1;tr|B5MCW2|B5MCW2_HUMAN Ribosomal protein L3 (Fragment) OS=Homo sapiens OX=9606 GN=R	7	8	8	8	7	6	4	1	1	1	3	4	3	7	6	4	1	1	1	3	4	3	7	6	4	1	1	1	3	4	3	20.6	20.6	20.6	46.108	403	403;351;272;305;180;261;407	0	35.02	18.9	15.9	12.2
Q12792;F8VS81;F8VRG3;F8W1Q9;A0A7I2V5B1;D6RG15;A0A7I2V2U8;A0A7I2V5D3;H0Y858;Q6IBS0	Q12792;F8VS81	9;6;2;2;1;1;1;1;1;1	9;6;2;2;1;1;1;1;1;1	9;6;2;2;1;1;1;1;1;1	Twinfilin-1	TWF1	sp|Q12792|TWF1_HUMAN Twinfilin-1 OS=Homo sapiens OX=9606 GN=TWF1 PE=1 SV=3;tr|F8VS81|F8VS81_HUMAN Twinfilin actin binding protein 1 (Fragment) OS=Homo sapiens OX=9606 GN=TWF1 PE=1 SV=1	10	9	9	9	8	4	5	0	1	1	3	2	3	8	4	5	0	1	1	3	2	3	8	4	5	0	1	1	3	2	3	28	28	28	40.282	350	350;291;59;113;251;254;296;318;1186;349	0	44.453	26	13.1	15.4
A0A0R4J2E8;A8MXP9;P43243;B3KM87;D6REM6;H0Y8T4;D6R991;D6RAM9;D6RAY2;D6RBI2;D6RBK5;D6RE02;D6RIA2;D6R8Z5	A0A0R4J2E8;A8MXP9;P43243;B3KM87;D6REM6;H0Y8T4;D6R991	8;8;8;6;6;4;4;2;2;2;2;2;2;1	8;8;8;6;6;4;4;2;2;2;2;2;2;1	8;8;8;6;6;4;4;2;2;2;2;2;2;1	Matrin-3	MATR3	tr|A0A0R4J2E8|A0A0R4J2E8_HUMAN Matrin-3 OS=Homo sapiens OX=9606 GN=MATR3 PE=1 SV=1;tr|A8MXP9|A8MXP9_HUMAN Matrin 3 OS=Homo sapiens OX=9606 GN=MATR3 PE=1 SV=1;sp|P43243|MATR3_HUMAN Matrin-3 OS=Homo sapiens OX=9606 GN=MATR3 PE=1 SV=2;tr|B3KM87|B3KM87_HUMAN M	14	8	8	8	5	6	5	4	3	1	2	1	3	5	6	5	4	3	1	2	1	3	5	6	5	4	3	1	2	1	3	13.3	13.3	13.3	94.622	847	847;895;847;509;794;334;433;81;86;109;121;124;172;107	0	20.791	7.8	10.2	8.5
A0A7I2V599;A0A7I2V2X6;P10809;A0A7I2YQK6;A0A7I2V5M1;E7ESH4;A0A7I2V5K3;A0A7I2YQ71;A0A7I2V369	A0A7I2V599;A0A7I2V2X6;P10809;A0A7I2YQK6	7;7;7;6;2;1;1;1;1	7;7;7;6;2;1;1;1;1	7;7;7;6;2;1;1;1;1	60 kDa heat shock protein, mitochondrial	HSPD1	tr|A0A7I2V599|A0A7I2V599_HUMAN 60 kDa heat shock protein, mitochondrial OS=Homo sapiens OX=9606 GN=HSPD1 PE=1 SV=1;tr|A0A7I2V2X6|A0A7I2V2X6_HUMAN 60 kDa heat shock protein, mitochondrial OS=Homo sapiens OX=9606 GN=HSPD1 PE=1 SV=1;sp|P10809|CH60_HUMAN 60 kD	9	7	7	7	5	3	5	3	4	4	4	3	2	5	3	5	3	4	4	4	3	2	5	3	5	3	4	4	4	3	2	12.7	12.7	12.7	57.785	537	537;541;573;482;375;231;296;310;322	0	58.44	9.9	6.1	10.4
J3KNB4;P49913	J3KNB4;P49913	2;2	2;2	2;2	Cathelicidin antimicrobial peptide;Antibacterial protein FALL-39;Antibacterial protein LL-37	CAMP	tr|J3KNB4|J3KNB4_HUMAN Cathelicidin antimicrobial peptide OS=Homo sapiens OX=9606 GN=CAMP PE=1 SV=1;sp|P49913|CAMP_HUMAN Cathelicidin antimicrobial peptide OS=Homo sapiens OX=9606 GN=CAMP PE=1 SV=1	2	2	2	2	2	1	2	1	1	1	1	2	2	2	1	2	1	1	1	1	2	2	2	1	2	1	1	1	1	2	2	9.2	9.2	9.2	19.591	173	173;170	0	22.859	9.2	4.6	9.2
H0YKD8;P46779;H0YLP6;H0YMF4	H0YKD8;P46779;H0YLP6;H0YMF4	5;5;4;4	5;5;4;4	5;5;4;4	60S ribosomal protein L28	RPL28	tr|H0YKD8|H0YKD8_HUMAN 60S ribosomal protein L28 OS=Homo sapiens OX=9606 GN=RPL28 PE=1 SV=1;sp|P46779|RL28_HUMAN 60S ribosomal protein L28 OS=Homo sapiens OX=9606 GN=RPL28 PE=1 SV=3;tr|H0YLP6|H0YLP6_HUMAN 60S ribosomal protein L28 OS=Homo sapiens OX=9606 G	4	5	5	5	4	4	4	2	1	0	3	3	4	4	4	4	2	1	0	3	3	4	4	4	4	2	1	0	3	3	4	27.6	27.6	27.6	19.072	170	170;137;89;112	0	8.6927	23.5	22.9	22.9
A0A994J6U9;A0A994J4E9;B4DUQ1;A0A994J782;A0A994J4U9;A0A994J4S7;P61978;Q5T6W2;A0A994J6T5;S4R359;A0A994J795;S4R457	A0A994J6U9;A0A994J4E9;B4DUQ1;A0A994J782;A0A994J4U9;A0A994J4S7;P61978;Q5T6W2;A0A994J6T5	12;12;12;12;12;12;12;11;10;2;2;1	12;12;12;12;12;12;12;11;10;2;2;1	12;12;12;12;12;12;12;11;10;2;2;1	Heterogeneous nuclear ribonucleoprotein K	HNRNPK	tr|A0A994J6U9|A0A994J6U9_HUMAN Heterogeneous nuclear ribonucleoprotein K OS=Homo sapiens OX=9606 GN=HNRNPK PE=4 SV=1;tr|A0A994J4E9|A0A994J4E9_HUMAN Heterogeneous nuclear ribonucleoprotein K OS=Homo sapiens OX=9606 GN=HNRNPK PE=4 SV=1;tr|B4DUQ1|B4DUQ1_HUMAN	12	12	12	12	4	5	4	6	4	4	4	6	7	4	5	4	6	4	4	4	6	7	4	5	4	6	4	4	4	6	7	34.1	34.1	34.1	47.91	434	434;435;439;453;458;459;463;379;359;100;106;77	0	16.288	12.9	16.8	11.8
P62263;A0A2R8Y811;E5RH77	P62263;A0A2R8Y811	3;3;1	3;3;1	3;3;1	40S ribosomal protein S14	RPS14	sp|P62263|RS14_HUMAN 40S ribosomal protein S14 OS=Homo sapiens OX=9606 GN=RPS14 PE=1 SV=3;tr|A0A2R8Y811|A0A2R8Y811_HUMAN Ribosomal protein S14 (Fragment) OS=Homo sapiens OX=9606 GN=RPS14 PE=1 SV=1	3	3	3	3	2	2	3	1	3	2	3	3	3	2	2	3	1	3	2	3	3	3	2	2	3	1	3	2	3	3	3	16.6	16.6	16.6	16.273	151	151;150;134	0	7.6228	16.6	16.6	16.6
C9JXA5;P62879;C9JIS1;C9JZN1;E7EP32;A0A7I2S2S9;A0A6Q8PFV8;A0A6Q8PFE0;Q9HAV0;A0A6Q8PFW8;H7C5J5;A0A6Q8PG88;C9JD14;F5H0S8;F5H8J8;F5H100;P16520;E9PCP0	C9JXA5;P62879;C9JIS1;C9JZN1;E7EP32;A0A7I2S2S9;A0A6Q8PFV8;A0A6Q8PFE0;Q9HAV0;A0A6Q8PFW8;H7C5J5	7;7;7;6;5;4;4;4;4;4;4;3;2;1;1;1;1;1	7;7;7;6;5;4;4;4;4;4;4;3;2;1;1;1;1;1	4;4;4;3;2;2;2;2;2;2;2;1;1;0;0;0;0;0	Guanine nucleotide-binding protein G(I)/G(S)/G(T) subunit beta-2;Guanine nucleotide-binding protein subunit beta-4	GNB2;GNB4	tr|C9JXA5|C9JXA5_HUMAN G protein subunit beta 2 (Fragment) OS=Homo sapiens OX=9606 GN=GNB2 PE=1 SV=1;sp|P62879|GBB2_HUMAN Guanine nucleotide-binding protein G(I)/G(S)/G(T) subunit beta-2 OS=Homo sapiens OX=9606 GN=GNB2 PE=1 SV=3;tr|C9JIS1|C9JIS1_HUMAN G pr	18	7	7	4	6	6	7	0	0	0	2	0	1	6	6	7	0	0	0	2	0	1	4	4	4	0	0	0	1	0	0	35.9	35.9	23.1	27.561	251	251;340;232;152;296;327;322;306;340;245;242;304;79;264;232;232;340;339	0	18.122	31.5	31.5	35.9
E9PP50;P23528;E9PLJ3;E9PS23;E9PQB7;G3V1A4;E9PK25;Q9Y281	E9PP50;P23528;E9PLJ3;E9PS23;E9PQB7;G3V1A4;E9PK25;Q9Y281	2;2;1;1;1;1;1;1	2;2;1;1;1;1;1;1	2;2;1;1;1;1;1;1	Cofilin-1;Cofilin-2	CFL1;CFL2	tr|E9PP50|E9PP50_HUMAN Cofilin 1 (Fragment) OS=Homo sapiens OX=9606 GN=CFL1 PE=1 SV=8;sp|P23528|COF1_HUMAN Cofilin-1 OS=Homo sapiens OX=9606 GN=CFL1 PE=1 SV=3;tr|E9PLJ3|E9PLJ3_HUMAN Cofilin 1 (Fragment) OS=Homo sapiens OX=9606 GN=CFL1 PE=1 SV=1;tr|E9PS23|E	8	2	2	2	2	2	2	1	1	0	1	2	1	2	2	2	1	1	0	1	2	1	2	2	2	1	1	0	1	2	1	14.5	14.5	14.5	17.777	159	159;166;79;90;122;149;204;166	0	6.3982	14.5	14.5	14.5
Q5VUJ6	Q5VUJ6	10	10	9	Leucine-rich repeat and calponin homology domain-containing protein 2	LRCH2	sp|Q5VUJ6|LRCH2_HUMAN Leucine-rich repeat and calponin homology domain-containing protein 2 OS=Homo sapiens OX=9606 GN=LRCH2 PE=1 SV=2	1	10	10	9	4	4	7	0	0	0	1	4	5	4	4	7	0	0	0	1	4	5	4	4	6	0	0	0	1	4	5	15.9	15.9	14.1	84.587	765	765	0	17.004	5.8	5	11.8
P23396;E9PL09;F2Z2S8;H0YEU2;E9PQ96;E9PJH4;H0YF32;E9PK82;H0YCJ7;E9PPU1;E9PQX2;H0YES8;E9PJN9;E9PSF4	P23396;E9PL09;F2Z2S8;H0YEU2;E9PQ96;E9PJH4;H0YF32;E9PK82;H0YCJ7;E9PPU1	6;5;4;4;3;3;3;3;3;3;2;1;1;1	6;5;4;4;3;3;3;3;3;3;2;1;1;1	6;5;4;4;3;3;3;3;3;3;2;1;1;1	40S ribosomal protein S3	RPS3	sp|P23396|RS3_HUMAN 40S ribosomal protein S3 OS=Homo sapiens OX=9606 GN=RPS3 PE=1 SV=2;tr|E9PL09|E9PL09_HUMAN 40S ribosomal protein S3 OS=Homo sapiens OX=9606 GN=RPS3 PE=1 SV=1;tr|F2Z2S8|F2Z2S8_HUMAN Ribosomal protein S3 OS=Homo sapiens OX=9606 GN=RPS3 PE=	14	6	6	6	3	4	5	3	3	3	1	1	3	3	4	5	3	3	3	1	1	3	3	4	5	3	3	3	1	1	3	23.9	23.9	23.9	26.688	243	243;231;117;171;91;115;123;128;135;158;44;33;36;103	0	10.71	12.3	17.7	20.6
Q02413	Q02413	8	8	8	Desmoglein-1	DSG1	sp|Q02413|DSG1_HUMAN Desmoglein-1 OS=Homo sapiens OX=9606 GN=DSG1 PE=1 SV=2	1	8	8	8	5	3	6	5	6	5	3	3	1	5	3	6	5	6	5	3	3	1	5	3	6	5	6	5	3	3	1	11.2	11.2	11.2	113.75	1049	1049	0	16.1	7.7	4.6	9.2
P01034	P01034	2	2	2	Cystatin-C	CST3	sp|P01034|CYTC_HUMAN Cystatin-C OS=Homo sapiens OX=9606 GN=CST3 PE=1 SV=1	1	2	2	2	2	1	2	2	2	2	1	2	2	2	1	2	2	2	2	1	2	2	2	1	2	2	2	2	1	2	2	19.2	19.2	19.2	15.799	146	146	0	11.319	19.2	7.5	19.2
C9JXB8;A0A994J4A5;C9JNW5;P83731	C9JXB8;A0A994J4A5;C9JNW5;P83731	3;3;3;3	3;3;3;3	3;3;3;3	60S ribosomal protein L24	RPL24	tr|C9JXB8|C9JXB8_HUMAN Ribosomal protein L24 OS=Homo sapiens OX=9606 GN=RPL24 PE=1 SV=1;tr|A0A994J4A5|A0A994J4A5_HUMAN Ribosomal protein L24 OS=Homo sapiens OX=9606 GN=RPL24 PE=4 SV=1;tr|C9JNW5|C9JNW5_HUMAN Ribosomal protein L24 OS=Homo sapiens OX=9606 GN=	4	3	3	3	3	2	3	2	1	1	1	1	2	3	2	3	2	1	1	1	1	2	3	2	3	2	1	1	1	1	2	24.8	24.8	24.8	14.369	121	121;135;150;157	0	8.7675	24.8	17.4	24.8
H0YH81;P06576;F8W079;F8W0P7;H0YI37	H0YH81;P06576;F8W079	6;6;4;2;1	6;6;4;2;1	6;6;4;2;1	ATP synthase subunit beta;ATP synthase subunit beta, mitochondrial	ATP5B	tr|H0YH81|H0YH81_HUMAN ATP synthase subunit beta (Fragment) OS=Homo sapiens OX=9606 GN=ATP5F1B PE=1 SV=1;sp|P06576|ATPB_HUMAN ATP synthase subunit beta, mitochondrial OS=Homo sapiens OX=9606 GN=ATP5F1B PE=1 SV=3;tr|F8W079|F8W079_HUMAN ATP synthase F1 subun	5	6	6	6	2	3	2	1	3	2	5	4	4	2	3	2	1	3	2	5	4	4	2	3	2	1	3	2	5	4	4	22.1	22.1	22.1	38.138	362	362;529;284;270;133	0	8.8767	5.8	9.7	5.8
A0A7P0TAI0;P11021;A0A7P0TB36	A0A7P0TAI0;P11021;A0A7P0TB36	9;9;8	8;8;7	8;8;7	78 kDa glucose-regulated protein	HSPA5	tr|A0A7P0TAI0|A0A7P0TAI0_HUMAN 78 kDa glucose-regulated protein OS=Homo sapiens OX=9606 GN=HSPA5 PE=1 SV=1;sp|P11021|BIP_HUMAN Endoplasmic reticulum chaperone BiP OS=Homo sapiens OX=9606 GN=HSPA5 PE=1 SV=2;tr|A0A7P0TB36|A0A7P0TB36_HUMAN 78 kDa glucose-regu	3	9	8	8	7	2	2	4	4	2	6	8	7	6	1	1	3	3	2	6	7	6	6	1	1	3	3	2	6	7	6	17	17	17	68.091	616	616;654;623	0	13.366	13.8	2.8	2.8
A0A7I2V4K5;X6R5C5;X6R8A1;P10619;U3KQ41;A0A7I2V3M2;A0A7I2V4Q9;U3KQU6;A0A7I2V2E2;A0A7I2V4R8;A0A7I2V4D1;A0A7I2YQT8;A0A7I2V3B2;Q5JZH0	A0A7I2V4K5;X6R5C5;X6R8A1;P10619	4;4;4;4;1;1;1;1;1;1;1;1;1;1	4;4;4;4;1;1;1;1;1;1;1;1;1;1	4;4;4;4;1;1;1;1;1;1;1;1;1;1	Carboxypeptidase;Lysosomal protective protein;Lysosomal protective protein 32 kDa chain;Lysosomal protective protein 20 kDa chain	CTSA	tr|A0A7I2V4K5|A0A7I2V4K5_HUMAN Carboxypeptidase OS=Homo sapiens OX=9606 GN=CTSA PE=1 SV=1;tr|X6R5C5|X6R5C5_HUMAN Carboxypeptidase OS=Homo sapiens OX=9606 GN=CTSA PE=1 SV=1;tr|X6R8A1|X6R8A1_HUMAN Carboxypeptidase OS=Homo sapiens OX=9606 GN=CTSA PE=1 SV=1;sp	14	4	4	4	4	3	3	0	0	0	1	1	2	4	3	3	0	0	0	1	1	2	4	3	3	0	0	0	1	1	2	9.6	9.6	9.6	50.925	450	450;481;498;480;109;203;215;231;236;260;363;371;389;392	0	11.799	9.6	7.8	7.1
E9PDU5;A0A087X295;Q9NNW5;E9PBK6;C9K020	E9PDU5;A0A087X295;Q9NNW5;E9PBK6	11;11;11;6;1	11;11;11;6;1	11;11;11;6;1	WD repeat-containing protein 6	WDR6	tr|E9PDU5|E9PDU5_HUMAN WD repeat domain 6 OS=Homo sapiens OX=9606 GN=WDR6 PE=1 SV=1;tr|A0A087X295|A0A087X295_HUMAN WD repeat domain 6 OS=Homo sapiens OX=9606 GN=WDR6 PE=1 SV=1;sp|Q9NNW5|WDR6_HUMAN WD repeat-containing protein 6 OS=Homo sapiens OX=9606 GN=W	5	11	11	11	6	7	10	0	1	0	6	3	4	6	7	10	0	1	0	6	3	4	6	7	10	0	1	0	6	3	4	13.6	13.6	13.6	116.17	1070	1070;1151;1121;569;271	0	17.523	8.2	9.4	12.6
O43166;F5GYF8;G3V4Z3;H0YJY2;A0A6Q8PH54;A0A6Q8PFQ0;Q9P2F8	O43166;F5GYF8	18;13;2;1;1;1;1	18;13;2;1;1;1;1	17;12;2;1;0;0;0	Signal-induced proliferation-associated 1-like protein 1	SIPA1L1	sp|O43166|SI1L1_HUMAN Signal-induced proliferation-associated 1-like protein 1 OS=Homo sapiens OX=9606 GN=SIPA1L1 PE=1 SV=4;tr|F5GYF8|F5GYF8_HUMAN Signal induced proliferation associated 1 like 1 OS=Homo sapiens OX=9606 GN=SIPA1L1 PE=1 SV=1	7	18	18	17	6	6	5	0	1	0	7	9	10	6	6	5	0	1	0	7	9	10	5	6	4	0	1	0	7	8	9	12.3	12.3	11.7	200.03	1804	1804;1257;32;261;1704;1773;1722	0	34.209	4.3	4.2	3.2
Q15717;M0QZR9	Q15717	5;1	5;1	5;1	ELAV-like protein 1	ELAVL1	sp|Q15717|ELAV1_HUMAN ELAV-like protein 1 OS=Homo sapiens OX=9606 GN=ELAVL1 PE=1 SV=2	2	5	5	5	3	2	2	2	5	3	4	2	4	3	2	2	2	5	3	4	2	4	3	2	2	2	5	3	4	2	4	17.8	17.8	17.8	36.091	326	326;153	0	11.177	11	7.7	7.7
E9PMS6;F8WD26;J3KP06;Q8WWI1;E9PMP7;A0A0A0MTE2;A0A8V8TKQ1;E9PMT2;H0Y424;E9PK58;E9PJ10;E9PLU6;H0YDG6;H0YDQ3	E9PMS6;F8WD26;J3KP06;Q8WWI1;E9PMP7;A0A0A0MTE2;A0A8V8TKQ1;E9PMT2	15;14;14;14;11;11;11;11;7;3;3;2;2;1	15;14;14;14;11;11;11;11;7;3;3;2;2;1	15;14;14;14;11;11;11;11;7;3;3;2;2;1	LIM domain only protein 7	LMO7	tr|E9PMS6|E9PMS6_HUMAN LIM domain 7 OS=Homo sapiens OX=9606 GN=LMO7 PE=1 SV=1;tr|F8WD26|F8WD26_HUMAN LIM domain 7 OS=Homo sapiens OX=9606 GN=LMO7 PE=1 SV=2;tr|J3KP06|J3KP06_HUMAN LIM domain 7 OS=Homo sapiens OX=9606 GN=LMO7 PE=1 SV=2;sp|Q8WWI1|LMO7_HUMAN L	14	15	15	15	4	6	7	0	0	0	10	6	9	4	6	7	0	0	0	10	6	9	4	6	7	0	0	0	10	6	9	15.1	15.1	15.1	145.42	1275	1275;1631;1668;1683;1045;1385;1390;1398;1055;165;191;121;305;292	0	23.7	4.5	6.4	7.8
A0A8I5KWD3;C9JTK4;A0A087WY71;C9JGT8;C9JPV8;E9PFW3;Q96CW1;C9JJD3;H7C4C3;A0A8I5QJU5;C9JJ47;A0A8I5KT55	A0A8I5KWD3;C9JTK4;A0A087WY71;C9JGT8;C9JPV8;E9PFW3;Q96CW1;C9JJD3;H7C4C3;A0A8I5QJU5;C9JJ47;A0A8I5KT55	6;6;6;6;6;6;6;5;5;4;4;3	6;6;6;6;6;6;6;5;5;4;4;3	6;6;6;6;6;6;6;5;5;4;4;3	AP-2 complex subunit mu	AP2M1	tr|A0A8I5KWD3|A0A8I5KWD3_HUMAN AP-2 complex subunit mu OS=Homo sapiens OX=9606 GN=AP2M1 PE=1 SV=1;tr|C9JTK4|C9JTK4_HUMAN AP-2 complex subunit mu OS=Homo sapiens OX=9606 GN=AP2M1 PE=1 SV=2;tr|A0A087WY71|A0A087WY71_HUMAN AP-2 complex subunit mu OS=Homo sapie	12	6	6	6	4	5	3	0	0	0	2	2	1	4	5	3	0	0	0	2	2	1	4	5	3	0	0	0	2	2	1	16.5	16.5	16.5	41.604	364	364;393;434;437;458;460;435;383;432;182;201;124	0	27.743	11.3	14.6	9.3
P62136;E9PMD7;A0A7I2V4F7	P62136;E9PMD7;A0A7I2V4F7	10;8;8	10;8;8	4;4;2	Serine/threonine-protein phosphatase PP1-alpha catalytic subunit;Serine/threonine-protein phosphatase	PPP1CA	sp|P62136|PP1A_HUMAN Serine/threonine-protein phosphatase PP1-alpha catalytic subunit OS=Homo sapiens OX=9606 GN=PPP1CA PE=1 SV=1;tr|E9PMD7|E9PMD7_HUMAN Serine/threonine-protein phosphatase OS=Homo sapiens OX=9606 GN=PPP1CA PE=1 SV=2;tr|A0A7I2V4F7|A0A7I2V4	3	10	10	4	9	7	7	0	0	0	2	3	1	9	7	7	0	0	0	2	3	1	4	3	3	0	0	0	2	3	1	36.1	36.1	16.1	37.512	330	330;295;335	0	26.301	30.6	24.8	26.1
P05109	P05109	2	2	2	Protein S100-A8;Protein S100-A8, N-terminally processed	S100A8	sp|P05109|S10A8_HUMAN Protein S100-A8 OS=Homo sapiens OX=9606 GN=S100A8 PE=1 SV=1	1	2	2	2	2	2	2	1	2	1	1	2	2	2	2	2	1	2	1	1	2	2	2	2	2	1	2	1	1	2	2	23.7	23.7	23.7	10.834	93	93	0	4.6085	23.7	23.7	23.7
A0A7P0S5H5;P60866;E5RIP1;E5RJX2;G3XAN0	A0A7P0S5H5;P60866;E5RIP1;E5RJX2;G3XAN0	2;2;1;1;1	2;2;1;1;1	2;2;1;1;1	40S ribosomal protein S20	RPS20	tr|A0A7P0S5H5|A0A7P0S5H5_HUMAN 40S ribosomal protein S20 (Fragment) OS=Homo sapiens OX=9606 GN=RPS20 PE=1 SV=1;sp|P60866|RS20_HUMAN 40S ribosomal protein S20 OS=Homo sapiens OX=9606 GN=RPS20 PE=1 SV=1;tr|E5RIP1|E5RIP1_HUMAN Ribosomal protein S20 OS=Homo sa	5	2	2	2	2	2	2	2	2	2	2	2	2	2	2	2	2	2	2	2	2	2	2	2	2	2	2	2	2	2	2	16.9	16.9	16.9	15.312	136	136;119;46;61;64	0	5.3496	16.9	16.9	16.9
Q9BPX5	Q9BPX5	2	2	2	Actin-related protein 2/3 complex subunit 5-like protein	ARPC5L	sp|Q9BPX5|ARP5L_HUMAN Actin-related protein 2/3 complex subunit 5-like protein OS=Homo sapiens OX=9606 GN=ARPC5L PE=1 SV=1	1	2	2	2	2	2	2	1	1	0	1	2	2	2	2	2	1	1	0	1	2	2	2	2	2	1	1	0	1	2	2	16.3	16.3	16.3	16.941	153	153	0	3.7141	16.3	16.3	16.3
A1L4H1	A1L4H1	1	1	1	Soluble scavenger receptor cysteine-rich domain-containing protein SSC5D	SSC5D	sp|A1L4H1|SRCRL_HUMAN Soluble scavenger receptor cysteine-rich domain-containing protein SSC5D OS=Homo sapiens OX=9606 GN=SSC5D PE=1 SV=3	1	1	1	1	1	0	1	1	1	0	0	1	1	1	0	1	1	1	0	0	1	1	1	0	1	1	1	0	0	1	1	1.3	1.3	1.3	165.74	1573	1573	0.0059289	1.731	1.3	0	1.3
E9PJD9;E9PLL6;P46776;E9PLX7	E9PJD9;E9PLL6;P46776;E9PLX7	2;2;2;1	2;2;2;1	2;2;2;1	60S ribosomal protein L27a	RPL27A	tr|E9PJD9|E9PJD9_HUMAN 60S ribosomal protein L27a OS=Homo sapiens OX=9606 GN=RPL27A PE=1 SV=1;tr|E9PLL6|E9PLL6_HUMAN Ribosomal protein L27a OS=Homo sapiens OX=9606 GN=RPL27A PE=1 SV=1;sp|P46776|RL27A_HUMAN 60S ribosomal protein L27a OS=Homo sapiens OX=9606	4	2	2	2	1	1	2	1	1	1	1	1	1	1	1	2	1	1	1	1	1	1	1	1	2	1	1	1	1	1	1	23.1	23.1	23.1	10.127	91	91;108;148;113	0	2.6863	12.1	12.1	23.1
H0YKS4;P07355;H0YN42;H0YMU9;H0YMD0;H0YNB8;H0YMM1;H0YNP5;A0A7I2V4P4;A6NMY6;H0YM50;H0YMW4;H0YMT9;H0YKX9;H0YLV6;H0YKZ7;H0YL33;H0YN28;H0YKL9;H0YKV8;H0YNA0;H0YMD9;H0YKN4;H0YLE2	H0YKS4;P07355;H0YN42;H0YMU9;H0YMD0;H0YNB8;H0YMM1;H0YNP5;A0A7I2V4P4;A6NMY6;H0YM50;H0YMW4;H0YMT9;H0YKX9;H0YLV6;H0YKZ7	5;5;5;5;5;5;4;4;4;4;4;4;3;3;3;3;2;2;2;2;2;1;1;1	5;5;5;5;5;5;4;4;4;4;4;4;3;3;3;3;2;2;2;2;2;1;1;1	5;5;5;5;5;5;4;4;4;4;4;4;3;3;3;3;2;2;2;2;2;1;1;1	Annexin;Annexin A2;Putative annexin A2-like protein	ANXA2;ANXA2P2	tr|H0YKS4|H0YKS4_HUMAN Annexin (Fragment) OS=Homo sapiens OX=9606 GN=ANXA2 PE=1 SV=1;sp|P07355|ANXA2_HUMAN Annexin A2 OS=Homo sapiens OX=9606 GN=ANXA2 PE=1 SV=2;tr|H0YN42|H0YN42_HUMAN Annexin (Fragment) OS=Homo sapiens OX=9606 GN=ANXA2 PE=1 SV=1;tr|H0YMU9|	24	5	5	5	3	4	3	2	3	2	3	2	2	3	4	3	2	3	2	3	2	2	3	4	3	2	3	2	3	2	2	31.8	31.8	31.8	19.53	176	176;339;256;230;227;189;149;175;155;339;248;367;133;134;132;119;222;139;110;81;79;65;69;45	0	167.62	20.5	26.7	20.5
A0A7I2V4J2;A0A7I2V5Y7;A0A7I2V535;Q15233;A0A7I2V4N2;A0A7I2V464;A0A7P0MRW0;H7C367;A0A7I2V4K9;C9IZL7;C9JYS8;C9J4X2;A0A7I2YQK8	A0A7I2V4J2;A0A7I2V5Y7;A0A7I2V535;Q15233;A0A7I2V4N2;A0A7I2V464;A0A7P0MRW0;H7C367;A0A7I2V4K9;C9IZL7;C9JYS8	9;9;9;9;8;8;8;7;6;5;5;1;1	7;7;7;7;6;6;6;5;6;3;5;1;1	7;7;7;7;6;6;6;5;6;3;5;1;1	Non-POU domain-containing octamer-binding protein	NONO	tr|A0A7I2V4J2|A0A7I2V4J2_HUMAN Non-POU domain containing octamer binding OS=Homo sapiens OX=9606 GN=NONO PE=1 SV=1;tr|A0A7I2V5Y7|A0A7I2V5Y7_HUMAN Non-POU domain containing octamer binding OS=Homo sapiens OX=9606 GN=NONO PE=1 SV=1;tr|A0A7I2V535|A0A7I2V535_H	13	9	7	7	7	6	5	1	1	1	4	3	2	6	5	5	1	1	1	4	2	2	6	5	5	1	1	1	4	2	2	18.4	16.2	16.2	53.818	468	468;476;501;471;360;360;515;234;411;207;247;124;130	0	9.7165	15.4	13.7	11.1
Q96HS1;A0A994J4Y8;F5GXG4	Q96HS1;A0A994J4Y8	11;11;4	11;11;4	11;11;4	Serine/threonine-protein phosphatase PGAM5, mitochondrial	PGAM5	sp|Q96HS1|PGAM5_HUMAN Serine/threonine-protein phosphatase PGAM5, mitochondrial OS=Homo sapiens OX=9606 GN=PGAM5 PE=1 SV=2;tr|A0A994J4Y8|A0A994J4Y8_HUMAN PGAM family member 5, mitochondrial serine/threonine protein phosphatase OS=Homo sapiens OX=9606 GN=PG	3	11	11	11	8	5	4	1	1	2	3	4	2	8	5	4	1	1	2	3	4	2	8	5	4	1	1	2	3	4	2	42.9	42.9	42.9	32.004	289	289;288;140	0	17.382	30.1	16.6	14.2
F8VS58;F8VQY6;F8VRK7;G3V210;F8VZS0;F8VU65;F8VWS0;Q8NHW5;P05388;F8VWV4;F8VPE8;F8VW21	F8VS58;F8VQY6;F8VRK7;G3V210;F8VZS0;F8VU65;F8VWS0;Q8NHW5;P05388;F8VWV4;F8VPE8;F8VW21	2;2;2;2;2;2;2;2;2;1;1;1	2;2;2;2;2;2;2;2;2;1;1;1	2;2;2;2;2;2;2;2;2;1;1;1	60S acidic ribosomal protein P0-like;60S acidic ribosomal protein P0	RPLP0;RPLP0P6	tr|F8VS58|F8VS58_HUMAN Ribosomal protein lateral stalk subunit P0 (Fragment) OS=Homo sapiens OX=9606 GN=RPLP0 PE=1 SV=1;tr|F8VQY6|F8VQY6_HUMAN Ribosomal protein lateral stalk subunit P0 OS=Homo sapiens OX=9606 GN=RPLP0 PE=1 SV=1;tr|F8VRK7|F8VRK7_HUMAN Ribo	12	2	2	2	2	2	2	2	1	1	2	2	2	2	2	2	2	1	1	2	2	2	2	2	2	2	1	1	2	2	2	17.4	17.4	17.4	13.828	121	121;142;156;166;246;247;281;317;317;111;153;244	0	35.092	17.4	17.4	17.4
J3QR09;J3KTE4;A0A7I2YQG2;P84098;A0A7I2V638;A0A7I2V4U6;A0A7I2V2L0;A0A7I2V512	J3QR09;J3KTE4;A0A7I2YQG2;P84098	4;4;4;4;1;1;1;1	4;4;4;4;1;1;1;1	4;4;4;4;1;1;1;1	Ribosomal protein L19;60S ribosomal protein L19	RPL19	tr|J3QR09|J3QR09_HUMAN Ribosomal protein L19 OS=Homo sapiens OX=9606 GN=RPL19 PE=1 SV=1;tr|J3KTE4|J3KTE4_HUMAN Ribosomal protein L19 OS=Homo sapiens OX=9606 GN=RPL19 PE=1 SV=1;tr|A0A7I2YQG2|A0A7I2YQG2_HUMAN Ribosomal protein L19 OS=Homo sapiens OX=9606 GN=	8	4	4	4	4	3	4	2	1	1	2	2	2	4	3	4	2	1	1	2	2	2	4	3	4	2	1	1	2	2	2	22.3	22.3	22.3	23.134	193	193;194;216;196;48;95;109;110	0	20.699	22.3	18.1	22.3
A0A7I2V5M5;A0A7I2V428;C9JLB1;A0A7I2V3F3;H7BY16;P19338;A0A7I2V349;A0A7I2V506;A0A7I2V2U7;A0A7I2V699;A0A7I2V2S8	A0A7I2V5M5;A0A7I2V428;C9JLB1;A0A7I2V3F3;H7BY16;P19338;A0A7I2V349;A0A7I2V506;A0A7I2V2U7;A0A7I2V699	7;7;7;7;7;7;6;6;6;5;3	7;7;7;7;7;7;6;6;6;5;3	7;7;7;7;7;7;6;6;6;5;3	Nucleolin	NCL	tr|A0A7I2V5M5|A0A7I2V5M5_HUMAN Nucleolin OS=Homo sapiens OX=9606 GN=NCL PE=1 SV=1;tr|A0A7I2V428|A0A7I2V428_HUMAN Nucleolin OS=Homo sapiens OX=9606 GN=NCL PE=1 SV=1;tr|C9JLB1|C9JLB1_HUMAN Nucleolin OS=Homo sapiens OX=9606 GN=NCL PE=1 SV=2;tr|A0A7I2V3F3|A0A7	11	7	7	7	1	4	1	1	1	2	5	5	5	1	4	1	1	1	2	5	5	5	1	4	1	1	1	2	5	5	5	10.4	10.4	10.4	73.641	672	672;689;694;695;734;710;595;602;626;616;389	0	6.669	1.3	5.2	1.5
P01876;A0A0G2JMB2;P01877	P01876;A0A0G2JMB2;P01877	4;3;2	4;3;2	4;3;2	Ig alpha-1 chain C region;Ig alpha-2 chain C region	IGHA1;IGHA2	sp|P01876|IGHA1_HUMAN Immunoglobulin heavy constant alpha 1 OS=Homo sapiens OX=9606 GN=IGHA1 PE=1 SV=3;tr|A0A0G2JMB2|A0A0G2JMB2_HUMAN Immunoglobulin heavy constant alpha 2 (Fragment) OS=Homo sapiens OX=9606 GN=IGHA2 PE=1 SV=1;sp|P01877|IGHA2_HUMAN Immunogl	3	4	4	4	4	3	3	3	3	3	2	4	4	4	3	3	3	3	3	2	4	4	4	3	3	3	3	3	2	4	4	11.3	11.3	11.3	42.848	398	398;340;391	0	7.6527	11.3	9	9
P0DP25;P0DP24;P0DP23;E7EMB3;F8WBR5;M0QZ52;G3V479;G3V361;A0A590UJI2;Q96HY3;A0A590UJC0;G3V226;C9J7T9;P27482;P02585	P0DP25;P0DP24;P0DP23;E7EMB3;F8WBR5;M0QZ52;G3V479;G3V361;A0A590UJI2;Q96HY3	4;4;4;4;2;2;2;2;2;2;1;1;1;1;1	4;4;4;4;2;2;2;2;2;2;1;1;1;1;1	4;4;4;4;2;2;2;2;2;2;1;1;1;1;1		CALM2;CALM3;CALM1	sp|P0DP25|CALM3_HUMAN Calmodulin-3 OS=Homo sapiens OX=9606 GN=CALM3 PE=1 SV=1;sp|P0DP24|CALM2_HUMAN Calmodulin-2 OS=Homo sapiens OX=9606 GN=CALM2 PE=1 SV=1;sp|P0DP23|CALM1_HUMAN Calmodulin-1 OS=Homo sapiens OX=9606 GN=CALM1 PE=1 SV=1;tr|E7EMB3|E7EMB3_HUMAN	15	4	4	4	3	3	3	0	1	1	2	3	3	3	3	3	0	1	1	2	3	3	3	3	3	0	1	1	2	3	3	35.6	35.6	35.6	16.837	149	149;149;149;196;65;83;83;98;104;113;59;76;145;149;160	0	7.0632	30.9	30.9	30.9
O15511;B1ALC0	O15511;B1ALC0	3;2	3;2	3;2	Actin-related protein 2/3 complex subunit 5	ARPC5	sp|O15511|ARPC5_HUMAN Actin-related protein 2/3 complex subunit 5 OS=Homo sapiens OX=9606 GN=ARPC5 PE=1 SV=3;tr|B1ALC0|B1ALC0_HUMAN Actin-related protein 2/3 complex subunit 5 OS=Homo sapiens OX=9606 GN=ARPC5 PE=1 SV=1	2	3	3	3	3	3	3	0	1	0	2	0	2	3	3	3	0	1	0	2	0	2	3	3	3	0	1	0	2	0	2	26.5	26.5	26.5	16.32	151	151;135	0	6.2746	26.5	26.5	26.5
P15927;Q5TEJ0;Q5TEJ7	P15927;Q5TEJ0;Q5TEJ7	4;2;2	4;2;2	4;2;2	Replication protein A 32 kDa subunit	RPA2	sp|P15927|RFA2_HUMAN Replication protein A 32 kDa subunit OS=Homo sapiens OX=9606 GN=RPA2 PE=1 SV=1;tr|Q5TEJ0|Q5TEJ0_HUMAN Replication protein A2 (Fragment) OS=Homo sapiens OX=9606 GN=RPA2 PE=1 SV=1;tr|Q5TEJ7|Q5TEJ7_HUMAN Replication protein A2 (Fragment)	3	4	4	4	4	3	3	0	0	0	0	0	0	4	3	3	0	0	0	0	0	0	4	3	3	0	0	0	0	0	0	17	17	17	29.247	270	270;122;179	0	6.4514	17	14.1	14.1
A0A087X0X3;P52272;M0QZM1;M0R2I7;M0R019;M0R2T0;M0QY96;M0R0Y6;M0QYQ7;M0R0N3	A0A087X0X3;P52272;M0QZM1	10;10;6;4;3;3;2;1;1;1	10;10;6;4;3;3;2;1;1;1	10;10;6;4;3;3;2;1;1;1	Heterogeneous nuclear ribonucleoprotein M	HNRNPM	tr|A0A087X0X3|A0A087X0X3_HUMAN Heterogeneous nuclear ribonucleoprotein M OS=Homo sapiens OX=9606 GN=HNRNPM PE=1 SV=1;sp|P52272|HNRPM_HUMAN Heterogeneous nuclear ribonucleoprotein M OS=Homo sapiens OX=9606 GN=HNRNPM PE=1 SV=3;tr|M0QZM1|M0QZM1_HUMAN Heteroge	10	10	10	10	4	6	5	0	1	1	4	6	4	4	6	5	0	1	1	4	6	4	4	6	5	0	1	1	4	6	4	16.4	16.4	16.4	77.569	730	730;730;383;214;352;357;116;99;219;275	0	13.712	7.7	11	9.2
M0QY43;A0A2R8Y4C3;A0A2R8Y454	M0QY43	46;9;3	2;0;0	2;0;0		MYH14	tr|M0QY43|M0QY43_HUMAN Myosin heavy chain 14 (Fragment) OS=Homo sapiens OX=9606 GN=MYH14 PE=1 SV=8	3	46	2	2	38	39	41	12	15	14	26	26	28	1	1	1	1	1	1	2	1	2	1	1	1	1	1	1	2	1	2	46.2	1.9	1.9	113.78	1002	1002;371;135	0	16.005	42.8	43.8	44.3
D6RG13;D6RAT0;P61247;D6R9B6;D6RB09;H0Y9Y4;D6RAS7;H0Y8L7;E9PFI5;D6RED7	D6RG13;D6RAT0;P61247;D6R9B6;D6RB09;H0Y9Y4	5;5;5;4;4;4;2;2;2;1	5;5;5;4;4;4;2;2;2;1	5;5;5;4;4;4;2;2;2;1	40S ribosomal protein S3a	RPS3A	tr|D6RG13|D6RG13_HUMAN Ribosomal protein S3A (Fragment) OS=Homo sapiens OX=9606 GN=RPS3A PE=1 SV=1;tr|D6RAT0|D6RAT0_HUMAN 40S ribosomal protein S3a OS=Homo sapiens OX=9606 GN=RPS3A PE=1 SV=1;sp|P61247|RS3A_HUMAN 40S ribosomal protein S3a OS=Homo sapiens OX	10	5	5	5	4	3	3	2	3	4	3	4	1	4	3	3	2	3	4	3	4	1	4	3	3	2	3	4	3	4	1	27.8	27.8	27.8	25.608	223	223;227;264;145;193;208;125;190;205;101	0	8.5571	22	17.5	17.5
Q9Y608;C9JSU1;H7C3N9;C9JJC9;C9JC17;C9J321;C9J0U5	Q9Y608;C9JSU1	13;7;4;2;2;2;2	13;7;4;2;2;2;2	12;6;4;2;2;2;2	Leucine-rich repeat flightless-interacting protein 2	LRRFIP2	sp|Q9Y608|LRRF2_HUMAN Leucine-rich repeat flightless-interacting protein 2 OS=Homo sapiens OX=9606 GN=LRRFIP2 PE=1 SV=1;tr|C9JSU1|C9JSU1_HUMAN LRR binding FLII interacting protein 2 (Fragment) OS=Homo sapiens OX=9606 GN=LRRFIP2 PE=1 SV=1	7	13	13	12	5	3	4	0	0	0	6	3	4	5	3	4	0	0	0	6	3	4	4	2	4	0	0	0	5	2	3	18.3	18.3	16.6	82.17	721	721;225;182;59;59;59;67	0	27.208	8.7	5.5	6.8
P15880;H0YEN5;E9PMM9;E9PQD7;I3L404;E9PM36;E9PPT0	P15880;H0YEN5;E9PMM9;E9PQD7;I3L404;E9PM36	5;4;4;4;3;3;2	5;4;4;4;3;3;2	5;4;4;4;3;3;2	40S ribosomal protein S2	RPS2	sp|P15880|RS2_HUMAN 40S ribosomal protein S2 OS=Homo sapiens OX=9606 GN=RPS2 PE=1 SV=2;tr|H0YEN5|H0YEN5_HUMAN 40S ribosomal protein S2 (Fragment) OS=Homo sapiens OX=9606 GN=RPS2 PE=1 SV=1;tr|E9PMM9|E9PMM9_HUMAN 40S ribosomal protein S2 (Fragment) OS=Homo s	7	5	5	5	1	2	2	1	1	1	1	2	4	1	2	2	1	1	1	1	2	4	1	2	2	1	1	1	1	2	4	17.4	17.4	17.4	31.324	293	293;195;218;235;155;209;197	0	5.9479	3.4	7.5	7.8
Q16352	Q16352	13	10	10	Alpha-internexin	INA	sp|Q16352|AINX_HUMAN Alpha-internexin OS=Homo sapiens OX=9606 GN=INA PE=1 SV=2	1	13	10	10	8	8	9	1	1	0	7	6	5	5	6	6	0	0	0	5	5	4	5	6	6	0	0	0	5	5	4	25.3	21.2	21.2	55.39	499	499	0	18.325	14.8	14.6	15.2
A0A8V8TNV9;A0A8V8TM21;Q92504	A0A8V8TNV9;A0A8V8TM21;Q92504	1;1;1	1;1;1	1;1;1	Zinc transporter SLC39A7	SLC39A7	tr|A0A8V8TNV9|A0A8V8TNV9_HUMAN Solute carrier family 39 member 7 OS=Homo sapiens OX=9606 GN=SLC39A7 PE=1 SV=1;tr|A0A8V8TM21|A0A8V8TM21_HUMAN Solute carrier family 39 member 7 OS=Homo sapiens OX=9606 GN=SLC39A7 PE=1 SV=1;sp|Q92504|S39A7_HUMAN Zinc transport	3	1	1	1	1	1	1	1	1	1	1	1	1	1	1	1	1	1	1	1	1	1	1	1	1	1	1	1	1	1	1	3.5	3.5	3.5	42.329	396	396;451;469	0	73.146	3.5	3.5	3.5
P62829;C9JD32;B9ZVP7;J3KT29;J3KTJ3	P62829;C9JD32;B9ZVP7;J3KT29	3;2;2;2;1	3;2;2;2;1	3;2;2;2;1	60S ribosomal protein L23	RPL23	sp|P62829|RL23_HUMAN 60S ribosomal protein L23 OS=Homo sapiens OX=9606 GN=RPL23 PE=1 SV=1;tr|C9JD32|C9JD32_HUMAN Ribosomal protein L23 (Fragment) OS=Homo sapiens OX=9606 GN=RPL23 PE=1 SV=1;tr|B9ZVP7|B9ZVP7_HUMAN Ribosomal protein L23 OS=Homo sapiens OX=960	5	3	3	3	2	1	3	1	2	1	1	2	2	2	1	3	1	2	1	1	2	2	2	1	3	1	2	1	1	2	2	32.1	32.1	32.1	14.865	140	140;91;114;122;81	0	7.1225	17.9	14.3	32.1
Q5T749	Q5T749	6	6	6	Keratinocyte proline-rich protein	KPRP	sp|Q5T749|KPRP_HUMAN Keratinocyte proline-rich protein OS=Homo sapiens OX=9606 GN=KPRP PE=1 SV=1	1	6	6	6	4	3	3	4	4	2	2	3	2	4	3	3	4	4	2	2	3	2	4	3	3	4	4	2	2	3	2	15.2	15.2	15.2	64.135	579	579	0	14.397	9.5	6	6
P42677;H0YMV8;Q71UM5;C9J1C5;C9JLI6	P42677;H0YMV8;Q71UM5	3;2;2;1;1	3;2;2;1;1	3;2;2;1;1	40S ribosomal protein S27;40S ribosomal protein S27-like	RPS27;RPS27L	sp|P42677|RS27_HUMAN 40S ribosomal protein S27 OS=Homo sapiens OX=9606 GN=RPS27 PE=1 SV=3;tr|H0YMV8|H0YMV8_HUMAN 40S ribosomal protein S27 OS=Homo sapiens OX=9606 GN=RPS27L PE=1 SV=1;sp|Q71UM5|RS27L_HUMAN 40S ribosomal protein S27-like OS=Homo sapiens OX=9	5	3	3	3	0	0	0	2	3	2	2	2	1	0	0	0	2	3	2	2	2	1	0	0	0	2	3	2	2	2	1	40.5	40.5	40.5	9.461	84	84;100;84;52;97	0	14.316	0	0	0
A0A2R8Y4F5;H0YFD6;P40939;A0A2R8YG21	A0A2R8Y4F5;H0YFD6;P40939	8;8;8;2	8;8;8;2	8;8;8;2	Trifunctional enzyme subunit alpha, mitochondrial;Long-chain enoyl-CoA hydratase;Long chain 3-hydroxyacyl-CoA dehydrogenase	HADHA	tr|A0A2R8Y4F5|A0A2R8Y4F5_HUMAN enoyl-CoA hydratase OS=Homo sapiens OX=9606 GN=HADHA PE=1 SV=1;tr|H0YFD6|H0YFD6_HUMAN enoyl-CoA hydratase OS=Homo sapiens OX=9606 GN=HADHA PE=1 SV=2;sp|P40939|ECHA_HUMAN Trifunctional enzyme subunit alpha, mitochondrial OS=Ho	4	8	8	8	4	4	6	0	0	0	1	2	1	4	4	6	0	0	0	1	2	1	4	4	6	0	0	0	1	2	1	11.5	11.5	11.5	79.466	728	728;792;763;499	0	9.0188	6.6	5.5	8.5
E9PKZ0;P62917;E9PP36;G3V1A1;E9PKU4	E9PKZ0;P62917;E9PP36;G3V1A1;E9PKU4	2;2;1;1;1	2;2;1;1;1	2;2;1;1;1	60S ribosomal protein L8	RPL8	tr|E9PKZ0|E9PKZ0_HUMAN 60S ribosomal protein L8 (Fragment) OS=Homo sapiens OX=9606 GN=RPL8 PE=1 SV=1;sp|P62917|RL8_HUMAN 60S ribosomal protein L8 OS=Homo sapiens OX=9606 GN=RPL8 PE=1 SV=2;tr|E9PP36|E9PP36_HUMAN 60S ribosomal protein L8 OS=Homo sapiens OX=9	5	2	2	2	2	2	2	0	0	0	2	2	1	2	2	2	0	0	0	2	2	1	2	2	2	0	0	0	2	2	1	13.2	13.2	13.2	22.389	205	205;257;148;167;235	0	4.2343	13.2	13.2	13.2
P62269;A0A0G2JQH2;Q5GGW2;J3JS69	P62269	7;3;3;1	7;3;3;1	7;3;3;1	40S ribosomal protein S18	RPS18	sp|P62269|RS18_HUMAN 40S ribosomal protein S18 OS=Homo sapiens OX=9606 GN=RPS18 PE=1 SV=3	4	7	7	7	3	2	4	2	5	3	3	4	3	3	2	4	2	5	3	3	4	3	3	2	4	2	5	3	3	4	3	42.1	42.1	42.1	17.718	152	152;33;34;82	0	13.58	19.1	13.2	29.6
K7EMA7;H7BY10;K7EJV9;K7ERT8;A8MUS3;P62750	K7EMA7;H7BY10;K7EJV9;K7ERT8;A8MUS3;P62750	2;2;2;2;2;2	2;2;2;2;2;2	2;2;2;2;2;2	60S ribosomal protein L23a	RPL23A	tr|K7EMA7|K7EMA7_HUMAN Ribosomal protein L23a OS=Homo sapiens OX=9606 GN=RPL23A PE=1 SV=1;tr|H7BY10|H7BY10_HUMAN Ribosomal protein L23a (Fragment) OS=Homo sapiens OX=9606 GN=RPL23A PE=1 SV=1;tr|K7EJV9|K7EJV9_HUMAN Ribosomal protein L23a (Fragment) OS=Homo	6	2	2	2	2	1	2	0	0	0	1	1	1	2	1	2	0	0	0	1	1	1	2	1	2	0	0	0	1	1	1	35.7	35.7	35.7	7.9232	70	70;158;170;175;194;156	0	2.6729	35.7	18.6	35.7
P46781;B5MCT8;C9JM19;F2Z3C0;A8MXK4	P46781;B5MCT8;C9JM19	3;2;2;1;1	3;2;2;1;1	3;2;2;1;1	40S ribosomal protein S9	RPS9	sp|P46781|RS9_HUMAN 40S ribosomal protein S9 OS=Homo sapiens OX=9606 GN=RPS9 PE=1 SV=3;tr|B5MCT8|B5MCT8_HUMAN 40S ribosomal protein S9 OS=Homo sapiens OX=9606 GN=RPS9 PE=1 SV=1;tr|C9JM19|C9JM19_HUMAN 40S ribosomal protein S9 OS=Homo sapiens OX=9606 GN=RPS9	5	3	3	3	2	1	2	1	1	1	1	1	2	2	1	2	1	1	1	1	1	2	2	1	2	1	1	1	1	1	2	16.5	16.5	16.5	22.591	194	194;139;156;77;79	0	3.5212	10.8	4.6	10.8
A0A8Z5AA41;A0A8Z5ABK9;S4R3V8;Q86X29;A0A8Z5DL71;M0QZL9;M0R1W9	A0A8Z5AA41;A0A8Z5ABK9;S4R3V8;Q86X29;A0A8Z5DL71	8;8;8;8;7;1;1	8;8;8;8;7;1;1	8;8;8;8;7;1;1	Lipolysis-stimulated lipoprotein receptor	LSR	tr|A0A8Z5AA41|A0A8Z5AA41_HUMAN Lipolysis stimulated lipoprotein receptor OS=Homo sapiens OX=9606 GN=LSR PE=1 SV=1;tr|A0A8Z5ABK9|A0A8Z5ABK9_HUMAN Lipolysis stimulated lipoprotein receptor OS=Homo sapiens OX=9606 GN=LSR PE=1 SV=1;tr|S4R3V8|S4R3V8_HUMAN Lipol	7	8	8	8	4	5	6	0	0	0	4	3	4	4	5	6	0	0	0	4	3	4	4	5	6	0	0	0	4	3	4	21.6	21.6	21.6	58.789	533	533;582;601;649;581;114;139	0	16.859	11.1	13.9	16.9
P61313;E7EX53;A0A2R8Y738;A0A2R8YEM3;E7EQV9;E7ERA2;E7ENU7	P61313;E7EX53;A0A2R8Y738;A0A2R8YEM3;E7EQV9	3;2;2;2;2;1;1	3;2;2;2;2;1;1	3;2;2;2;2;1;1	60S ribosomal protein L15;Ribosomal protein L15	RPL15	sp|P61313|RL15_HUMAN 60S ribosomal protein L15 OS=Homo sapiens OX=9606 GN=RPL15 PE=1 SV=2;tr|E7EX53|E7EX53_HUMAN Ribosomal protein L15 (Fragment) OS=Homo sapiens OX=9606 GN=RPL15 PE=1 SV=1;tr|A0A2R8Y738|A0A2R8Y738_HUMAN Ribosomal protein L15 (Fragment) OS=	7	3	3	3	3	2	3	1	1	1	1	1	1	3	2	3	1	1	1	1	1	1	3	2	3	1	1	1	1	1	1	15.7	15.7	15.7	24.146	204	204;133;138;169;174;44;175	0	5.9753	15.7	12.3	15.7
P62851	P62851	4	4	4	40S ribosomal protein S25	RPS25	sp|P62851|RS25_HUMAN 40S ribosomal protein S25 OS=Homo sapiens OX=9606 GN=RPS25 PE=1 SV=1	1	4	4	4	4	1	1	0	2	1	0	2	2	4	1	1	0	2	1	0	2	2	4	1	1	0	2	1	0	2	2	29.6	29.6	29.6	13.742	125	125	0	4.27	29.6	8	8.8
A0A0A0MSI0;Q06830;A0A0A0MRQ5;H7C3T4;Q13162	A0A0A0MSI0;Q06830;A0A0A0MRQ5	5;5;3;1;1	5;5;3;1;1	4;4;2;1;1	Peroxiredoxin-1	PRDX1	tr|A0A0A0MSI0|A0A0A0MSI0_HUMAN Peroxiredoxin-1 (Fragment) OS=Homo sapiens OX=9606 GN=PRDX1 PE=1 SV=1;sp|Q06830|PRDX1_HUMAN Peroxiredoxin-1 OS=Homo sapiens OX=9606 GN=PRDX1 PE=1 SV=1;tr|A0A0A0MRQ5|A0A0A0MRQ5_HUMAN Peroxiredoxin 1 OS=Homo sapiens OX=9606 GN=	5	5	5	4	3	3	2	1	1	2	3	2	1	3	3	2	1	1	2	3	2	1	3	3	1	1	1	1	2	1	1	31.6	31.6	25.1	18.976	171	171;199;97;161;271	0	7.1995	18.7	19.3	13.5
Q5H9A7;P01033;Q5H9B4;Q5H9B5	Q5H9A7;P01033;Q5H9B4;Q5H9B5	2;2;1;1	2;2;1;1	2;2;1;1	Metalloproteinase inhibitor 1	TIMP1	tr|Q5H9A7|Q5H9A7_HUMAN TIMP metallopeptidase inhibitor 1 OS=Homo sapiens OX=9606 GN=TIMP1 PE=1 SV=1;sp|P01033|TIMP1_HUMAN Metalloproteinase inhibitor 1 OS=Homo sapiens OX=9606 GN=TIMP1 PE=1 SV=1;tr|Q5H9B4|Q5H9B4_HUMAN TIMP metallopeptidase inhibitor 1 (Fra	4	2	2	2	2	1	0	1	1	1	1	1	1	2	1	0	1	1	1	1	1	1	2	1	0	1	1	1	1	1	1	14.7	14.7	14.7	16.057	143	143;207;95;136	0	7.6509	14.7	8.4	0
Q969S3	Q969S3	1	1	1	Zinc finger protein 622	ZNF622	sp|Q969S3|ZN622_HUMAN Cytoplasmic 60S subunit biogenesis factor ZNF622 OS=Homo sapiens OX=9606 GN=ZNF622 PE=1 SV=1	1	1	1	1	0	1	0	0	0	0	0	0	0	0	1	0	0	0	0	0	0	0	0	1	0	0	0	0	0	0	0	4.6	4.6	4.6	54.271	477	477	0	3.456	0	4.6	0
P31942	P31942	4	4	4	Heterogeneous nuclear ribonucleoprotein H3	HNRNPH3	sp|P31942|HNRH3_HUMAN Heterogeneous nuclear ribonucleoprotein H3 OS=Homo sapiens OX=9606 GN=HNRNPH3 PE=1 SV=2	1	4	4	4	2	1	2	0	2	2	2	3	3	2	1	2	0	2	2	2	3	3	2	1	2	0	2	2	2	3	3	12.7	12.7	12.7	36.926	346	346	0	5.0922	6.1	2.6	6.1
Q9Y3I0	Q9Y3I0	5	5	5	tRNA-splicing ligase RtcB homolog	RTCB	sp|Q9Y3I0|RTCB_HUMAN RNA-splicing ligase RtcB homolog OS=Homo sapiens OX=9606 GN=RTCB PE=1 SV=1	1	5	5	5	3	3	3	3	4	2	2	2	1	3	3	3	3	4	2	2	2	1	3	3	3	3	4	2	2	2	1	12.9	12.9	12.9	55.21	505	505	0	16.053	8.5	8.5	8.5
E7EPB3;P50914	E7EPB3;P50914	4;4	4;4	4;4	60S ribosomal protein L14	RPL14	tr|E7EPB3|E7EPB3_HUMAN 60S ribosomal protein L14 OS=Homo sapiens OX=9606 GN=RPL14 PE=1 SV=1;sp|P50914|RL14_HUMAN 60S ribosomal protein L14 OS=Homo sapiens OX=9606 GN=RPL14 PE=1 SV=4	2	4	4	4	4	2	3	0	1	1	2	1	1	4	2	3	0	1	1	2	1	1	4	2	3	0	1	1	2	1	1	36.3	36.3	36.3	14.558	124	124;215	0	6.8291	36.3	18.5	28.2
A0A6I8PIX7;O95425;A0A0J9YWY6;A0A6I8PL75	A0A6I8PIX7;O95425;A0A0J9YWY6	12;12;9;2	12;12;9;2	12;12;9;2	Supervillin	SVIL	tr|A0A6I8PIX7|A0A6I8PIX7_HUMAN Supervillin OS=Homo sapiens OX=9606 GN=SVIL PE=1 SV=1;sp|O95425|SVIL_HUMAN Supervillin OS=Homo sapiens OX=9606 GN=SVIL PE=1 SV=2;tr|A0A0J9YWY6|A0A0J9YWY6_HUMAN Supervillin (Fragment) OS=Homo sapiens OX=9606 GN=SVIL PE=1 SV=1	4	12	12	12	6	5	6	0	0	0	4	7	5	6	5	6	0	0	0	4	7	5	6	5	6	0	0	0	4	7	5	8.4	8.4	8.4	213.63	1904	1904;2214;963;279	0	22.734	4	3.4	4
M0QZC5;P62280;M0R1H5;M0R1H6	M0QZC5;P62280	6;6;1;1	6;6;1;1	6;6;1;1	40S ribosomal protein S11	RPS11	tr|M0QZC5|M0QZC5_HUMAN Ribosomal protein S11 OS=Homo sapiens OX=9606 GN=RPS11 PE=1 SV=1;sp|P62280|RS11_HUMAN 40S ribosomal protein S11 OS=Homo sapiens OX=9606 GN=RPS11 PE=1 SV=3	4	6	6	6	2	3	3	1	1	1	2	3	4	2	3	3	1	1	1	2	3	4	2	3	3	1	1	1	2	3	4	39.8	39.8	39.8	13.997	118	118;158;79;88	0	6.0159	15.3	24.6	24.6
A0A7I2V2G2;D6RCD7;P38646;H0Y8K0;A0A7I2V3F7;A0A7I2V2S7;A0A7I2YQB2;A0A3B3ITI4	A0A7I2V2G2;D6RCD7;P38646;H0Y8K0;A0A7I2V3F7;A0A7I2V2S7;A0A7I2YQB2;A0A3B3ITI4	6;6;6;5;5;5;4;3	6;6;6;5;5;5;4;3	6;6;6;5;5;5;4;3	Stress-70 protein, mitochondrial	HSPA9	tr|A0A7I2V2G2|A0A7I2V2G2_HUMAN Stress-70 protein, mitochondrial OS=Homo sapiens OX=9606 GN=HSPA9 PE=1 SV=1;tr|D6RCD7|D6RCD7_HUMAN Stress-70 protein, mitochondrial OS=Homo sapiens OX=9606 GN=HSPA9 PE=1 SV=2;sp|P38646|GRP75_HUMAN Stress-70 protein, mitochond	8	6	6	6	3	3	2	3	1	1	4	3	5	3	3	2	3	1	1	4	3	5	3	3	2	3	1	1	4	3	5	11.5	11.5	11.5	66.601	610	610;665;679;458;603;648;577;180	0	11.556	6.1	4.8	3.4
K7EPL4	K7EPL4	1	1	1		USP32	tr|K7EPL4|K7EPL4_HUMAN Ubiquitin specific peptidase 32 (Fragment) OS=Homo sapiens OX=9606 GN=USP32 PE=4 SV=1	1	1	1	1	0	0	0	1	1	1	1	1	1	0	0	0	1	1	1	1	1	1	0	0	0	1	1	1	1	1	1	17.2	17.2	17.2	9.4947	87	87	0	3.5602	0	0	0
P62277;J3KMX5;E9PS50	P62277;J3KMX5	5;4;2	5;4;2	5;4;2	40S ribosomal protein S13	RPS13	sp|P62277|RS13_HUMAN 40S ribosomal protein S13 OS=Homo sapiens OX=9606 GN=RPS13 PE=1 SV=2;tr|J3KMX5|J3KMX5_HUMAN 40S ribosomal protein S13 OS=Homo sapiens OX=9606 GN=RPS13 PE=1 SV=1	3	5	5	5	4	3	3	2	1	1	2	3	3	4	3	3	2	1	1	2	3	3	4	3	3	2	1	1	2	3	3	28.5	28.5	28.5	17.222	151	151;148;116	0	9.8718	21.2	16.6	16.6
P50402;A0A804HIV7;Q5HY57;A0A804HLA2	P50402;A0A804HIV7;Q5HY57	4;3;3;1	4;3;3;1	4;3;3;1	Emerin	EMD	sp|P50402|EMD_HUMAN Emerin OS=Homo sapiens OX=9606 GN=EMD PE=1 SV=1;tr|A0A804HIV7|A0A804HIV7_HUMAN Emerin OS=Homo sapiens OX=9606 GN=EMD PE=1 SV=1;tr|Q5HY57|Q5HY57_HUMAN Emerin OS=Homo sapiens OX=9606 GN=EMD PE=1 SV=1	4	4	4	4	3	4	4	0	1	0	2	2	2	3	4	4	0	1	0	2	2	2	3	4	4	0	1	0	2	2	2	20.5	20.5	20.5	28.994	254	254;215;219;106	0	10.778	13.8	20.5	20.5
P17066;P48741	P17066;P48741	11;6	1;1	1;1	Heat shock 70 kDa protein 6;Putative heat shock 70 kDa protein 7	HSPA6;HSPA7	sp|P17066|HSP76_HUMAN Heat shock 70 kDa protein 6 OS=Homo sapiens OX=9606 GN=HSPA6 PE=1 SV=2;sp|P48741|HSP77_HUMAN Putative heat shock 70 kDa protein 7 OS=Homo sapiens OX=9606 GN=HSPA7 PE=5 SV=2	2	11	1	1	9	5	10	5	7	5	7	8	8	1	1	1	1	1	1	1	1	1	1	1	1	1	1	1	1	1	1	16.3	1.7	1.7	71.027	643	643;367	0	15.38	13.8	10.1	14.9
Q8NCA5;E9PH82;A0A8I5KR56;A0A8I5QKV5;A0A8I5KZA5;B4DT23	Q8NCA5;E9PH82;A0A8I5KR56;A0A8I5QKV5;A0A8I5KZA5;B4DT23	6;5;5;5;5;3	6;5;5;5;5;3	6;5;5;5;5;3	Protein FAM98A	FAM98A	sp|Q8NCA5|FA98A_HUMAN Protein FAM98A OS=Homo sapiens OX=9606 GN=FAM98A PE=1 SV=2;tr|E9PH82|E9PH82_HUMAN Family with sequence similarity 98 member A OS=Homo sapiens OX=9606 GN=FAM98A PE=1 SV=1;tr|A0A8I5KR56|A0A8I5KR56_HUMAN Family with sequence similarity 9	6	6	6	6	3	3	2	3	3	3	1	1	1	3	3	2	3	3	3	1	1	1	3	3	2	3	3	3	1	1	1	16.4	16.4	16.4	55.272	518	518;312;356;383;421;323	0	15.311	7.9	7.1	5.2
A0A7P0MNE9;P35030	A0A7P0MNE9;P35030	1;1	1;1	1;1	Trypsin-3	PRSS3	tr|A0A7P0MNE9|A0A7P0MNE9_HUMAN Serine protease 3 OS=Homo sapiens OX=9606 GN=PRSS3 PE=1 SV=1;sp|P35030|TRY3_HUMAN Trypsin-3 OS=Homo sapiens OX=9606 GN=PRSS3 PE=1 SV=2	2	1	1	1	0	0	1	1	1	1	1	1	1	0	0	1	1	1	1	1	1	1	0	0	1	1	1	1	1	1	1	5	5	5	28.134	259	259;304	0	14.378	0	0	5
J3KN67;A0A2R2Y2Q3;P06753;A0A494C034	J3KN67;A0A2R2Y2Q3;P06753	18;17;14;2	2;2;2;2	2;2;2;2	Tropomyosin alpha-3 chain	TPM3	tr|J3KN67|J3KN67_HUMAN Tropomyosin 3 OS=Homo sapiens OX=9606 GN=TPM3 PE=1 SV=1;tr|A0A2R2Y2Q3|A0A2R2Y2Q3_HUMAN Tropomyosin 3 OS=Homo sapiens OX=9606 GN=TPM3 PE=1 SV=1;sp|P06753|TPM3_HUMAN Tropomyosin alpha-3 chain OS=Homo sapiens OX=9606 GN=TPM3 PE=1 SV=2	4	18	2	2	15	14	14	3	3	3	10	9	8	2	1	2	0	0	0	2	1	1	2	1	2	0	0	0	2	1	1	47	7	7	33.222	285	285;285;285;97	0	80.321	43.9	41.4	43.2
G3V2V8;J3KMY5;H0YIZ1;G3V3E8;E7EMS2;G3V3D1;P61916	G3V2V8;J3KMY5;H0YIZ1;G3V3E8;E7EMS2;G3V3D1;P61916	5;5;5;5;5;5;5	5;5;5;5;5;5;5	5;5;5;5;5;5;5	Epididymal secretory protein E1	NPC2	tr|G3V2V8|G3V2V8_HUMAN NPC intracellular cholesterol transporter 2 (Fragment) OS=Homo sapiens OX=9606 GN=NPC2 PE=1 SV=1;tr|J3KMY5|J3KMY5_HUMAN NPC intracellular cholesterol transporter 2 OS=Homo sapiens OX=9606 GN=NPC2 PE=1 SV=1;tr|H0YIZ1|H0YIZ1_HUMAN NPC	7	5	5	5	4	3	4	2	3	2	3	2	2	4	3	4	2	3	2	3	2	2	4	3	4	2	3	2	3	2	2	31.1	31.1	31.1	13.078	122	122;148;173;174;201;221;151	0	6.106	31.1	18	18
Q9Y224;H0YJB9;G3V4C6	Q9Y224;H0YJB9;G3V4C6	3;2;2	3;2;2	3;2;2	UPF0568 protein C14orf166	C14orf166	sp|Q9Y224|RTRAF_HUMAN RNA transcription, translation and transport factor protein OS=Homo sapiens OX=9606 GN=RTRAF PE=1 SV=1;tr|H0YJB9|H0YJB9_HUMAN RNA transcription, translation and transport factor protein (Fragment) OS=Homo sapiens OX=9606 GN=RTRAF PE=1	3	3	3	3	3	3	3	2	2	1	1	1	0	3	3	3	2	2	1	1	1	0	3	3	3	2	2	1	1	1	0	15.6	15.6	15.6	28.068	244	244;129;193	0	6.524	15.6	15.6	15.6
A0A7I2V4L7;B1ANR0;Q13310;A0A7I2V5W9;H0Y5F5;A0A7I2V598;H0YEU6;B1ANR1;A0A7I2V4V6	A0A7I2V4L7;B1ANR0;Q13310;A0A7I2V5W9;H0Y5F5;A0A7I2V598	11;11;11;9;8;8;5;3;3	5;5;5;4;4;4;4;1;2	5;5;5;4;4;4;4;1;2	Polyadenylate-binding protein;Polyadenylate-binding protein 4	PABPC4	tr|A0A7I2V4L7|A0A7I2V4L7_HUMAN Polyadenylate-binding protein OS=Homo sapiens OX=9606 GN=PABPC4 PE=1 SV=1;tr|B1ANR0|B1ANR0_HUMAN Polyadenylate-binding protein OS=Homo sapiens OX=9606 GN=PABPC4 PE=1 SV=1;sp|Q13310|PABP4_HUMAN Polyadenylate-binding protein 4	9	11	5	5	3	1	2	6	7	5	7	7	6	1	0	0	2	2	2	2	3	2	1	0	0	2	2	2	2	3	2	20	9.5	9.5	66.499	601	601;615;644;598;550;584;370;129;354	0	6.6251	7.7	1.8	4.7
P62913;Q5VVC8	P62913;Q5VVC8	3;2	3;2	3;2	60S ribosomal protein L11	RPL11	sp|P62913|RL11_HUMAN 60S ribosomal protein L11 OS=Homo sapiens OX=9606 GN=RPL11 PE=1 SV=2;tr|Q5VVC8|Q5VVC8_HUMAN 60S ribosomal protein L11 OS=Homo sapiens OX=9606 GN=RPL11 PE=1 SV=2	2	3	3	3	3	1	2	1	1	1	0	2	2	3	1	2	1	1	1	0	2	2	3	1	2	1	1	1	0	2	2	19.7	19.7	19.7	20.252	178	178;167	0	9.3341	19.7	7.9	14.6
J3QLD9;E7EMK3;Q14254;K7EKW9	J3QLD9;E7EMK3;Q14254;K7EKW9	7;7;7;4	7;7;7;4	7;7;7;4	Flotillin-2	FLOT2	tr|J3QLD9|J3QLD9_HUMAN Flotillin OS=Homo sapiens OX=9606 GN=FLOT2 PE=1 SV=1;tr|E7EMK3|E7EMK3_HUMAN Flotillin OS=Homo sapiens OX=9606 GN=FLOT2 PE=1 SV=1;sp|Q14254|FLOT2_HUMAN Flotillin-2 OS=Homo sapiens OX=9606 GN=FLOT2 PE=1 SV=2;tr|K7EKW9|K7EKW9_HUMAN Flot	4	7	7	7	5	3	3	0	0	0	2	4	4	5	3	3	0	0	0	2	4	4	5	3	3	0	0	0	2	4	4	17.5	17.5	17.5	47.142	428	428;483;428;249	0	10.867	12.1	7.9	7.7
P13639	P13639	8	8	8	Elongation factor 2	EEF2	sp|P13639|EF2_HUMAN Elongation factor 2 OS=Homo sapiens OX=9606 GN=EEF2 PE=1 SV=4	1	8	8	8	1	2	3	0	4	1	3	4	2	1	2	3	0	4	1	3	4	2	1	2	3	0	4	1	3	4	2	10	10	10	95.337	858	858	0	8.3095	1.3	2.9	3.7
A0A0G2JNZ2;A0A0G2JPP5;A0A669KB89;Q14160;A0A0G2JMS7;H0YCG0;Q5T0G3;A0A669KAX5;Q9BTT6	A0A0G2JNZ2;A0A0G2JPP5;A0A669KB89;Q14160;A0A0G2JMS7	11;11;11;11;10;4;1;1;1	11;11;11;11;10;4;1;1;1	11;11;11;11;10;4;1;1;1	Protein scribble homolog	SCRIB	tr|A0A0G2JNZ2|A0A0G2JNZ2_HUMAN Protein scribble homolog OS=Homo sapiens OX=9606 GN=SCRIB PE=1 SV=1;tr|A0A0G2JPP5|A0A0G2JPP5_HUMAN Protein scribble homolog OS=Homo sapiens OX=9606 GN=SCRIB PE=1 SV=1;tr|A0A669KB89|A0A669KB89_HUMAN Scribble planar cell polari	9	11	11	11	6	4	6	0	0	0	4	6	3	6	4	6	0	0	0	4	6	3	6	4	6	0	0	0	4	6	3	7.6	7.6	7.6	174.91	1630	1630;1655;1658;1630;1549;650;154;214;524	0	14.63	4.2	2.5	4.4
P07864;F5H155;G3XAP5;F5H245;F5GZ11;F5H5G7;F5GWS6;F5H326	P07864;F5H155;G3XAP5;F5H245;F5GZ11	7;5;5;5;4;2;1;1	7;5;5;5;4;2;1;1	6;4;4;4;4;1;1;1	L-lactate dehydrogenase C chain;L-lactate dehydrogenase	LDHC	sp|P07864|LDHC_HUMAN L-lactate dehydrogenase C chain OS=Homo sapiens OX=9606 GN=LDHC PE=1 SV=4;tr|F5H155|F5H155_HUMAN L-lactate dehydrogenase OS=Homo sapiens OX=9606 GN=LDHC PE=1 SV=1;tr|G3XAP5|G3XAP5_HUMAN L-lactate dehydrogenase OS=Homo sapiens OX=9606 G	8	7	7	6	2	4	3	3	3	2	3	3	1	2	4	3	3	3	2	3	3	1	2	4	3	3	3	2	2	2	1	23.5	23.5	19.9	36.311	332	332;225;241;318;167;183;45;51	0	14.668	6.6	13.9	10.8
F8W7C6;X1WI28;P27635;H7C123;H7C2C5;Q96L21;B8A6G2;A6QRI9	F8W7C6;X1WI28;P27635;H7C123;H7C2C5;Q96L21	5;5;5;4;4;3;1;1	5;5;5;4;4;3;1;1	5;5;5;4;4;3;1;1	60S ribosomal protein L10;60S ribosomal protein L10-like	RPL10;RPL10L	tr|F8W7C6|F8W7C6_HUMAN Ribosomal protein L10 OS=Homo sapiens OX=9606 GN=RPL10 PE=1 SV=2;tr|X1WI28|X1WI28_HUMAN Ribosomal protein L10 (Fragment) OS=Homo sapiens OX=9606 GN=RPL10 PE=1 SV=7;sp|P27635|RL10_HUMAN 60S ribosomal protein L10 OS=Homo sapiens OX=960	8	5	5	5	3	4	4	1	1	1	1	1	2	3	4	4	1	1	1	1	1	2	3	4	4	1	1	1	1	1	2	33.7	33.7	33.7	18.565	163	163;200;214;91;131;214;108;181	0	7.63	22.7	28.2	28.2
A0A0U1RR71;A0A8C8NWT4;A1L390;G3V311;G3V3I3;G3V278	A0A0U1RR71;A0A8C8NWT4;A1L390;G3V311	9;9;9;6;1;1	9;9;9;6;1;1	9;9;9;6;1;1	Pleckstrin homology domain-containing family G member 3	PLEKHG3	tr|A0A0U1RR71|A0A0U1RR71_HUMAN Pleckstrin homology and RhoGEF domain containing G3 OS=Homo sapiens OX=9606 GN=PLEKHG3 PE=1 SV=2;tr|A0A8C8NWT4|A0A8C8NWT4_HUMAN Pleckstrin homology and RhoGEF domain containing G3 OS=Homo sapiens OX=9606 GN=PLEKHG3 PE=1 SV=1;	6	9	9	9	8	4	6	0	0	0	2	2	1	8	4	6	0	0	0	2	2	1	8	4	6	0	0	0	2	2	1	9.8	9.8	9.8	136.5	1240	1240;1340;1219;724;161;188	0	14.951	8.7	4.7	7.3
A0A0U1RRM4;P26599;A0A0D9SF20;A6NLN1;A0A7I2V621;K7EK45;A0A7I2V4H6;A0A6Q8PEX4;A0A087WUW5;A0A087WU68;K7EKJ7	A0A0U1RRM4;P26599;A0A0D9SF20;A6NLN1;A0A7I2V621;K7EK45;A0A7I2V4H6;A0A6Q8PEX4	4;4;3;3;3;2;2;2;1;1;1	4;4;3;3;3;2;2;2;1;1;1	4;4;3;3;3;2;2;2;1;1;1	Polypyrimidine tract-binding protein 1	PTBP1	tr|A0A0U1RRM4|A0A0U1RRM4_HUMAN Polypyrimidine tract-binding protein 1 OS=Homo sapiens OX=9606 GN=PTBP1 PE=1 SV=1;sp|P26599|PTBP1_HUMAN Polypyrimidine tract-binding protein 1 OS=Homo sapiens OX=9606 GN=PTBP1 PE=1 SV=2;tr|A0A0D9SF20|A0A0D9SF20_HUMAN Polypyri	11	4	4	4	2	2	3	2	3	2	2	4	1	2	2	3	2	3	2	2	4	1	2	2	3	2	3	2	2	4	1	8.3	8.3	8.3	62.463	588	588;557;197;527;559;256;313;339;81;227;237	0	6.6616	4.6	4.1	6
F8VVM2;Q00325	F8VVM2;Q00325	2;2	2;2	2;2	Phosphate carrier protein, mitochondrial	SLC25A3	tr|F8VVM2|F8VVM2_HUMAN Phosphate carrier protein, mitochondrial OS=Homo sapiens OX=9606 GN=SLC25A3 PE=1 SV=1;sp|Q00325|MPCP_HUMAN Phosphate carrier protein, mitochondrial OS=Homo sapiens OX=9606 GN=SLC25A3 PE=1 SV=2	2	2	2	2	2	1	1	1	1	2	1	1	1	2	1	1	1	1	2	1	1	1	2	1	1	1	1	2	1	1	1	8	8	8	36.161	324	324;362	0	5.8235	8	3.7	3.7
P62906	P62906	6	6	6	60S ribosomal protein L10a	RPL10A	sp|P62906|RL10A_HUMAN 60S ribosomal protein L10a OS=Homo sapiens OX=9606 GN=RPL10A PE=1 SV=2	1	6	6	6	3	3	6	0	1	0	0	0	0	3	3	6	0	1	0	0	0	0	3	3	6	0	1	0	0	0	0	24	24	24	24.831	217	217	0	9.0907	12.4	20.3	24
M0R3D6;M0R1A7;M0R117;Q02543;M0R0P7	M0R3D6;M0R1A7;M0R117;Q02543;M0R0P7	4;4;4;4;3	4;4;4;4;3	4;4;4;4;3	60S ribosomal protein L18a	RPL18A	tr|M0R3D6|M0R3D6_HUMAN 60S ribosomal protein L18a (Fragment) OS=Homo sapiens OX=9606 GN=RPL18A PE=1 SV=1;tr|M0R1A7|M0R1A7_HUMAN 60S ribosomal protein L18a OS=Homo sapiens OX=9606 GN=RPL18A PE=1 SV=1;tr|M0R117|M0R117_HUMAN 60S ribosomal protein L18a OS=Homo	5	4	4	4	2	2	1	0	2	0	1	1	1	2	2	1	0	2	0	1	1	1	2	2	1	0	2	0	1	1	1	28.4	28.4	28.4	16.714	141	141;147;154;176;137	0	3.3677	12.8	13.5	7.1
P07305	P07305	3	3	3	Histone H1.0;Histone H1.0, N-terminally processed	H1F0	sp|P07305|H10_HUMAN Histone H1.0 OS=Homo sapiens OX=9606 GN=H1-0 PE=1 SV=3	1	3	3	3	2	2	2	0	0	0	3	2	2	2	2	2	0	0	0	3	2	2	2	2	2	0	0	0	3	2	2	15.5	15.5	15.5	20.863	194	194	0	2.975	8.8	11.3	11.3
F8WF69;P09496	F8WF69;P09496	2;2	2;2	2;2	Clathrin light chain A	CLTA	tr|F8WF69|F8WF69_HUMAN Clathrin light chain OS=Homo sapiens OX=9606 GN=CLTA PE=1 SV=1;sp|P09496|CLCA_HUMAN Clathrin light chain A OS=Homo sapiens OX=9606 GN=CLTA PE=1 SV=1	2	2	2	2	2	2	1	0	0	0	0	1	1	2	2	1	0	0	0	0	1	1	2	2	1	0	0	0	0	1	1	6.5	6.5	6.5	27.818	260	260;248	0.0022124	2.3466	6.5	6.5	3.5
Q99959;A0A8V8TR06;A0A8V8TQE3;A0A8V8TRB4;A0A8V8TQD7;A0A8V8TPU9;A0A087WXY2	Q99959;A0A8V8TR06;A0A8V8TQE3;A0A8V8TRB4;A0A8V8TQD7	6;4;4;3;3;2;1	6;4;4;3;3;2;1	6;4;4;3;3;2;1	Plakophilin-2	PKP2	sp|Q99959|PKP2_HUMAN Plakophilin-2 OS=Homo sapiens OX=9606 GN=PKP2 PE=1 SV=2;tr|A0A8V8TR06|A0A8V8TR06_HUMAN Plakophilin 2 OS=Homo sapiens OX=9606 GN=PKP2 PE=1 SV=1;tr|A0A8V8TQE3|A0A8V8TQE3_HUMAN Plakophilin 2 (Fragment) OS=Homo sapiens OX=9606 GN=PKP2 PE=1	7	6	6	6	3	2	4	0	0	0	1	4	4	3	2	4	0	0	0	1	4	4	3	2	4	0	0	0	1	4	4	7.7	7.7	7.7	97.414	881	881;314;328;174;667;561;36	0	10.081	3.5	2.4	5
A0A7I2V4I6;P22626;A0A7I2V4S4;A0A7I2V4N1;A0A7I2V3P1;A0A7I2V3P7;A0A7I2V323;A0A087WUI2;A0A024RA28;A0A7I2V4N0;A0A7I2YQN4	A0A7I2V4I6;P22626;A0A7I2V4S4;A0A7I2V4N1;A0A7I2V3P1;A0A7I2V3P7;A0A7I2V323;A0A087WUI2;A0A024RA28	7;7;6;6;6;6;6;5;5;3;2	7;7;6;6;6;6;6;5;5;3;2	7;7;6;6;6;6;6;5;5;3;2	Heterogeneous nuclear ribonucleoproteins A2/B1	HNRNPA2B1;HNRPA2B1	tr|A0A7I2V4I6|A0A7I2V4I6_HUMAN Heterogeneous nuclear ribonucleoproteins A2/B1 OS=Homo sapiens OX=9606 GN=HNRNPA2B1 PE=1 SV=1;sp|P22626|ROA2_HUMAN Heterogeneous nuclear ribonucleoproteins A2/B1 OS=Homo sapiens OX=9606 GN=HNRNPA2B1 PE=1 SV=2;tr|A0A7I2V4S4|A0	11	7	7	7	5	4	5	1	1	1	4	2	1	5	4	5	1	1	1	4	2	1	5	4	5	1	1	1	4	2	1	24.8	24.8	24.8	34.259	318	318;353;260;301;309;325;333;261;301;158;155	0	52.645	19.2	13.5	17.9
G3V1B3;M0R181;P46778	G3V1B3;M0R181;P46778	2;2;2	2;2;2	2;2;2	60S ribosomal protein L21	RPL21	tr|G3V1B3|G3V1B3_HUMAN 60S ribosomal protein L21 OS=Homo sapiens OX=9606 GN=RPL21 PE=1 SV=1;tr|M0R181|M0R181_HUMAN 60S ribosomal protein L21 (Fragment) OS=Homo sapiens OX=9606 GN=RPL21 PE=1 SV=1;sp|P46778|RL21_HUMAN 60S ribosomal protein L21 OS=Homo sapien	3	2	2	2	2	2	2	1	2	1	1	1	1	2	2	2	1	2	1	1	1	1	2	2	2	1	2	1	1	1	1	29.9	29.9	29.9	9.8864	87	87;122;160	0	12.682	29.9	29.9	29.9
D6RF88;C9JE88;D6R930;P16870	D6RF88;C9JE88;D6R930;P16870	3;3;3;3	3;3;3;3	3;3;3;3	Carboxypeptidase E	CPE	tr|D6RF88|D6RF88_HUMAN Carboxypeptidase E (Fragment) OS=Homo sapiens OX=9606 GN=CPE PE=1 SV=1;tr|C9JE88|C9JE88_HUMAN Carboxypeptidase E (Fragment) OS=Homo sapiens OX=9606 GN=CPE PE=1 SV=2;tr|D6R930|D6R930_HUMAN Carboxypeptidase E (Fragment) OS=Homo sapiens	4	3	3	3	2	2	2	2	3	2	1	1	1	2	2	2	2	3	2	1	1	1	2	2	2	2	3	2	1	1	1	28.1	28.1	28.1	15.66	139	139;147;157;476	0	5.0616	18	17.3	17.3
P25705;K7ENJ4;K7EK77;K7ERX7;K7EJP1;K7EQH4	P25705;K7ENJ4;K7EK77;K7ERX7	6;4;4;3;2;1	6;4;4;3;2;1	6;4;4;3;2;1	ATP synthase subunit alpha, mitochondrial	ATP5A1	sp|P25705|ATPA_HUMAN ATP synthase subunit alpha, mitochondrial OS=Homo sapiens OX=9606 GN=ATP5F1A PE=1 SV=1;tr|K7ENJ4|K7ENJ4_HUMAN ATP synthase F1 subunit alpha (Fragment) OS=Homo sapiens OX=9606 GN=ATP5F1A PE=1 SV=1;tr|K7EK77|K7EK77_HUMAN ATP synthase F1	6	6	6	6	2	3	3	4	2	2	3	2	1	2	3	3	4	2	2	3	2	1	2	3	3	4	2	2	3	2	1	11.6	11.6	11.6	59.75	553	553;199;207;205;144;111	0	9.3691	5.6	6.1	6.1
P61353;K7ELC7;K7EQQ9;K7ERY7	P61353;K7ELC7	5;4;1;1	5;4;1;1	5;4;1;1	60S ribosomal protein L27	RPL27	sp|P61353|RL27_HUMAN 60S ribosomal protein L27 OS=Homo sapiens OX=9606 GN=RPL27 PE=1 SV=2;tr|K7ELC7|K7ELC7_HUMAN 60S ribosomal protein L27 (Fragment) OS=Homo sapiens OX=9606 GN=RPL27 PE=1 SV=1	4	5	5	5	3	4	4	0	1	0	0	0	1	3	4	4	0	1	0	0	0	1	3	4	4	0	1	0	0	0	1	43.4	43.4	43.4	15.798	136	136;144;38;40	0	6.4363	30.1	36.8	36
H3BQN4;J3KPS3;P04075;H3BUH7;H3BPS8;H3BMQ8;H3BR04;H3BR68;H3BU78	H3BQN4;J3KPS3;P04075;H3BUH7;H3BPS8;H3BMQ8;H3BR04	4;4;4;3;3;2;2;1;1	4;4;4;3;3;2;2;1;1	4;4;4;3;3;2;2;1;1	Fructose-bisphosphate aldolase;Fructose-bisphosphate aldolase A	ALDOA	tr|H3BQN4|H3BQN4_HUMAN Fructose-bisphosphate aldolase OS=Homo sapiens OX=9606 GN=ALDOA PE=1 SV=1;tr|J3KPS3|J3KPS3_HUMAN Fructose-bisphosphate aldolase OS=Homo sapiens OX=9606 GN=ALDOA PE=1 SV=1;sp|P04075|ALDOA_HUMAN Fructose-bisphosphate aldolase A OS=Homo	9	4	4	4	2	0	1	1	2	4	2	2	2	2	0	1	1	2	4	2	2	2	2	0	1	1	2	4	2	2	2	13.6	13.6	13.6	39.34	361	361;368;364;155;278;140;162;130;204	0	5.7331	7.2	0	3.9
Q9NZ32;G3V2Q5;G3V5Y4;F6S9Y6;V9GYX7;G3V524;G3V4K6	Q9NZ32;G3V2Q5;G3V5Y4;F6S9Y6;V9GYX7	5;4;4;4;4;2;1	5;4;4;4;4;2;1	5;4;4;4;4;2;1	Actin-related protein 10	ACTR10	sp|Q9NZ32|ARP10_HUMAN Actin-related protein 10 OS=Homo sapiens OX=9606 GN=ACTR10 PE=1 SV=1;tr|G3V2Q5|G3V2Q5_HUMAN Actin related protein 10 OS=Homo sapiens OX=9606 GN=ACTR10 PE=1 SV=1;tr|G3V5Y4|G3V5Y4_HUMAN Actin related protein 10 OS=Homo sapiens OX=9606 G	7	5	5	5	4	4	3	0	0	0	1	1	1	4	4	3	0	0	0	1	1	1	4	4	3	0	0	0	1	1	1	15.8	15.8	15.8	46.306	417	417;126;179;185;302;90;43	0	6.0844	10.1	13.7	7.9
F6X3N5;P62873;F6UT28;A0A994J6X8;A0A994J3T6;B1AKQ8;B3KVK2	F6X3N5;P62873;F6UT28;A0A994J6X8;A0A994J3T6;B1AKQ8	6;6;5;5;5;4;2	3;3;2;2;2;1;2	3;3;2;2;2;1;2	Guanine nucleotide-binding protein G(I)/G(S)/G(T) subunit beta-1	GNB1	tr|F6X3N5|F6X3N5_HUMAN G protein subunit beta 1 OS=Homo sapiens OX=9606 GN=GNB1 PE=1 SV=2;sp|P62873|GBB1_HUMAN Guanine nucleotide-binding protein G(I)/G(S)/G(T) subunit beta-1 OS=Homo sapiens OX=9606 GN=GNB1 PE=1 SV=3;tr|F6UT28|F6UT28_HUMAN G protein subun	7	6	3	3	5	5	6	0	0	0	4	2	4	3	3	3	0	0	0	3	2	3	3	3	3	0	0	0	3	2	3	21.7	11.9	11.9	36.045	327	327;340;165;194;296;107;240	0	7.4485	18.3	18.3	21.7
O75955;A0A140T9W4;A0A140T9R1;A0A140T907;A2AB13;A0A0G2JJQ6;A0A140T9X0;A2AB12;A2AB09;A2AB10;A0A140T974;A2AB11	O75955;A0A140T9W4;A0A140T9R1	5;3;3;2;2;2;2;2;2;2;1;1	5;3;3;2;2;2;2;2;2;2;1;1	5;3;3;2;2;2;2;2;2;2;1;1	Flotillin-1	FLOT1	sp|O75955|FLOT1_HUMAN Flotillin-1 OS=Homo sapiens OX=9606 GN=FLOT1 PE=1 SV=3;tr|A0A140T9W4|A0A140T9W4_HUMAN Flotillin (Fragment) OS=Homo sapiens OX=9606 GN=FLOT1 PE=1 SV=1;tr|A0A140T9R1|A0A140T9R1_HUMAN Flotillin (Fragment) OS=Homo sapiens OX=9606 GN=FLOT1	12	5	5	5	3	3	3	0	0	0	2	3	2	3	3	3	0	0	0	2	3	2	3	3	3	0	0	0	2	3	2	11.7	11.7	11.7	47.355	427	427;186;357;60;185;210;231;235;238;252;90;192	0	9.5387	8.9	8.9	8.9
A0A5H1ZRQ2;A0A1X7SBZ2;Q92841	A0A5H1ZRQ2;A0A1X7SBZ2;Q92841	11;11;11	5;5;5	5;5;5	Probable ATP-dependent RNA helicase DDX17	DDX17	tr|A0A5H1ZRQ2|A0A5H1ZRQ2_HUMAN RNA helicase OS=Homo sapiens OX=9606 GN=DDX17 PE=1 SV=2;tr|A0A1X7SBZ2|A0A1X7SBZ2_HUMAN RNA helicase OS=Homo sapiens OX=9606 GN=DDX17 PE=1 SV=1;sp|Q92841|DDX17_HUMAN Probable ATP-dependent RNA helicase DDX17 OS=Homo sapiens OX	3	11	5	5	5	4	6	2	3	2	8	6	7	2	2	2	1	1	1	3	2	3	2	2	2	1	1	1	3	2	3	17	8.1	8.1	80.457	731	731;729;729	0	7.2152	7.9	6.3	9.2
F8VYE8;P36873;F8W0W8;F8VR82;A0A087WYY5	F8VYE8;P36873;F8W0W8;F8VR82	8;8;7;6;3	2;2;1;2;2	2;2;1;2;2	Serine/threonine-protein phosphatase;Serine/threonine-protein phosphatase PP1-gamma catalytic subunit	PPP1CC	tr|F8VYE8|F8VYE8_HUMAN Serine/threonine-protein phosphatase OS=Homo sapiens OX=9606 GN=PPP1CC PE=1 SV=1;sp|P36873|PP1G_HUMAN Serine/threonine-protein phosphatase PP1-gamma catalytic subunit OS=Homo sapiens OX=9606 GN=PPP1CC PE=1 SV=1;tr|F8W0W8|F8W0W8_HUMAN	5	8	2	2	7	6	6	1	0	0	1	2	2	2	2	2	1	0	0	1	2	2	2	2	2	1	0	0	1	2	2	29.6	7.9	7.9	34.95	304	304;323;332;270;140	0	21.344	23.7	23.4	22.4
D6R9P3;D6RD18;D6RBZ0;Q99729	D6R9P3;D6RD18;D6RBZ0;Q99729	2;2;2;1	2;2;2;1	2;2;2;1	Heterogeneous nuclear ribonucleoprotein A/B	HNRNPAB	tr|D6R9P3|D6R9P3_HUMAN Heterogeneous nuclear ribonucleoprotein A/B OS=Homo sapiens OX=9606 GN=HNRNPAB PE=1 SV=1;tr|D6RD18|D6RD18_HUMAN Heterogeneous nuclear ribonucleoprotein A/B OS=Homo sapiens OX=9606 GN=HNRNPAB PE=1 SV=1;tr|D6RBZ0|D6RBZ0_HUMAN Heterogen	4	2	2	2	1	1	2	2	1	1	2	2	2	1	1	2	2	1	1	2	2	2	1	1	2	2	1	1	2	2	2	9.6	9.6	9.6	30.302	280	280;283;327;332	0	9.0537	4.6	4.6	9.6
H3BPE7;P35637	H3BPE7;P35637	4;4	4;4	3;3	RNA-binding protein FUS	FUS	tr|H3BPE7|H3BPE7_HUMAN FUS RNA binding protein OS=Homo sapiens OX=9606 GN=FUS PE=1 SV=1;sp|P35637|FUS_HUMAN RNA-binding protein FUS OS=Homo sapiens OX=9606 GN=FUS PE=1 SV=1	2	4	4	3	1	2	3	2	2	1	3	3	0	1	2	3	2	2	1	3	3	0	1	2	2	2	2	1	2	2	0	12.9	12.9	10.2	53.496	527	527;526	0	17.192	4.6	7.2	9.9
B7Z645;A0A7I2V2F2;A0A7I2V309;A0A7I2V4Z0;A0A7I2YQN2;O60506;A0A7I2V5Q6;A0A7I2V346;A0A7I2YQV8;A0A6Q8PHG0;A0A7I2V2F0;A0A7I2V4J0;F6UXX1	B7Z645;A0A7I2V2F2;A0A7I2V309;A0A7I2V4Z0;A0A7I2YQN2;O60506;A0A7I2V5Q6;A0A7I2V346;A0A7I2YQV8	6;6;6;6;6;6;5;5;3;2;1;1;1	6;6;6;6;6;6;5;5;3;2;1;1;1	4;4;4;4;4;4;3;4;2;0;0;0;0	Heterogeneous nuclear ribonucleoprotein Q	SYNCRIP	tr|B7Z645|B7Z645_HUMAN Synaptotagmin binding cytoplasmic RNA interacting protein OS=Homo sapiens OX=9606 GN=SYNCRIP PE=1 SV=1;tr|A0A7I2V2F2|A0A7I2V2F2_HUMAN Synaptotagmin binding cytoplasmic RNA interacting protein OS=Homo sapiens OX=9606 GN=SYNCRIP PE=1 S	13	6	6	4	2	3	2	0	4	2	0	2	2	2	3	2	0	4	2	0	2	2	1	1	1	0	3	1	0	1	1	14.2	14.2	9.3	52.046	464	464;490;525;545;561;623;337;524;465;186;67;165;185	0	7.0905	5	7.3	4.7
P62753;A2A3R7;A2A3R5	P62753;A2A3R7;A2A3R5	4;3;2	4;3;2	4;3;2	40S ribosomal protein S6	RPS6	sp|P62753|RS6_HUMAN 40S ribosomal protein S6 OS=Homo sapiens OX=9606 GN=RPS6 PE=1 SV=1;tr|A2A3R7|A2A3R7_HUMAN 40S ribosomal protein S6 OS=Homo sapiens OX=9606 GN=RPS6 PE=1 SV=1;tr|A2A3R5|A2A3R5_HUMAN 40S ribosomal protein S6 OS=Homo sapiens OX=9606 GN=RPS6	3	4	4	4	1	1	1	0	1	0	1	3	0	1	1	1	0	1	0	1	3	0	1	1	1	0	1	0	1	3	0	18.9	18.9	18.9	28.68	249	249;91;218	0	4.7034	3.2	3.2	4.8
P28289	P28289	4	4	4	Tropomodulin-1	TMOD1	sp|P28289|TMOD1_HUMAN Tropomodulin-1 OS=Homo sapiens OX=9606 GN=TMOD1 PE=1 SV=1	1	4	4	4	3	3	2	0	0	0	1	1	3	3	3	2	0	0	0	1	1	3	3	3	2	0	0	0	1	1	3	13.1	13.1	13.1	40.569	359	359	0	5.2297	9.5	9.5	5.8
Q9Y2D5;C9JVY5	Q9Y2D5;C9JVY5	5;3	5;3	5;3	A-kinase anchor protein 2	AKAP2	sp|Q9Y2D5|AKAP2_HUMAN A-kinase anchor protein 2 OS=Homo sapiens OX=9606 GN=AKAP2 PE=1 SV=3;tr|C9JVY5|C9JVY5_HUMAN PALM2 and AKAP2 fusion (Fragment) OS=Homo sapiens OX=9606 GN=PALM2AKAP2 PE=1 SV=1	2	5	5	5	2	2	2	0	0	0	1	3	2	2	2	2	0	0	0	1	3	2	2	2	2	0	0	0	1	3	2	8.1	8.1	8.1	94.659	859	859;778	0	6.4741	2.6	2.1	4.5
P07196	P07196	12	10	10	Neurofilament light polypeptide	NEFL	sp|P07196|NFL_HUMAN Neurofilament light polypeptide OS=Homo sapiens OX=9606 GN=NEFL PE=1 SV=3	1	12	10	10	5	2	6	1	1	0	5	4	3	3	1	4	0	0	0	3	3	2	3	1	4	0	0	0	3	3	2	21.9	20.4	20.4	61.516	543	543	0	15.152	10.5	3.5	11
A0A2R8Y804;A0A2R8Y543;A0A2R8Y5C3;A0A2R8Y750;B4DGU4;A0A2R8YCH5;A0A2R8Y5A3;P35222;A0A2R8Y5Z1;A0A2R8Y7Z0;A0A2R8Y6G0;A0A2R8Y815	A0A2R8Y804;A0A2R8Y543;A0A2R8Y5C3;A0A2R8Y750;B4DGU4;A0A2R8YCH5;A0A2R8Y5A3;P35222;A0A2R8Y5Z1;A0A2R8Y7Z0;A0A2R8Y6G0	8;8;8;8;8;8;8;8;7;7;5;3	7;7;7;7;7;7;7;7;6;6;4;3	7;7;7;7;7;7;7;7;6;6;4;3	Catenin beta-1	CTNNB1	tr|A0A2R8Y804|A0A2R8Y804_HUMAN Catenin beta 1 OS=Homo sapiens OX=9606 GN=CTNNB1 PE=1 SV=1;tr|A0A2R8Y543|A0A2R8Y543_HUMAN Catenin beta 1 OS=Homo sapiens OX=9606 GN=CTNNB1 PE=1 SV=1;tr|A0A2R8Y5C3|A0A2R8Y5C3_HUMAN Catenin beta 1 OS=Homo sapiens OX=9606 GN=CTN	12	8	7	7	4	2	6	0	0	0	3	3	2	4	2	6	0	0	0	2	3	2	4	2	6	0	0	0	2	3	2	12.7	11.3	11.3	77.206	702	702;715;737;744;774;779;783;781;752;780;367;186	0	18.35	7.1	3.6	9.5
P62266;D6RD47;D6RDJ2;D6RIX0;D6R9I7	P62266;D6RD47	3;2;1;1;1	3;2;1;1;1	3;2;1;1;1	40S ribosomal protein S23	RPS23	sp|P62266|RS23_HUMAN 40S ribosomal protein S23 OS=Homo sapiens OX=9606 GN=RPS23 PE=1 SV=3;tr|D6RD47|D6RD47_HUMAN 40S ribosomal protein S23 OS=Homo sapiens OX=9606 GN=RPS23 PE=1 SV=1	5	3	3	3	2	1	2	1	0	0	1	2	1	2	1	2	1	0	0	1	2	1	2	1	2	1	0	0	1	2	1	21.7	21.7	21.7	15.807	143	143;134;55;85;123	0	5.7869	16.1	8.4	16.1
Q8NI35;A0A2R8Y549;A0A0U1RR46	Q8NI35;A0A2R8Y549;A0A0U1RR46	7;7;5	7;7;5	7;7;5	InaD-like protein	INADL	sp|Q8NI35|INADL_HUMAN InaD-like protein OS=Homo sapiens OX=9606 GN=PATJ PE=1 SV=3;tr|A0A2R8Y549|A0A2R8Y549_HUMAN PATJ crumbs cell polarity complex component OS=Homo sapiens OX=9606 GN=PATJ PE=1 SV=1;tr|A0A0U1RR46|A0A0U1RR46_HUMAN PATJ crumbs cell polarity	3	7	7	7	5	4	3	0	0	0	1	1	2	5	4	3	0	0	0	1	1	2	5	4	3	0	0	0	1	1	2	5.3	5.3	5.3	196.37	1801	1801;1882;683	0	19.084	4.1	3.2	2.7
Q96II8;E9PD99;H7C1G3;H7C0J8;F8WFB5	Q96II8;E9PD99	8;6;3;3;1	8;6;3;3;1	6;4;1;1;1	Leucine-rich repeat and calponin homology domain-containing protein 3	LRCH3	sp|Q96II8|LRCH3_HUMAN DISP complex protein LRCH3 OS=Homo sapiens OX=9606 GN=LRCH3 PE=1 SV=2;tr|E9PD99|E9PD99_HUMAN Leucine rich repeats and calponin homology domain containing 3 OS=Homo sapiens OX=9606 GN=LRCH3 PE=1 SV=1	5	8	8	6	3	6	6	0	0	0	1	1	1	3	6	6	0	0	0	1	1	1	1	5	5	0	0	0	1	1	1	11.6	11.6	10.2	86.082	777	777;623;214;227;92	0	12.237	3	9.5	9.5
Q16778;P33778;P23527;P06899;Q8N257;Q6DRA6;Q6DN03	Q16778;P33778;P23527;P06899;Q8N257	6;6;6;6;5;2;2	2;2;2;2;2;2;2	2;2;2;2;2;2;2	Histone H2B type 2-E;Histone H2B type 1-B;Histone H2B type 1-O;Histone H2B type 1-J;Histone H2B type 3-B	HIST2H2BE;HIST1H2BB;HIST1H2BO;HIST1H2BJ;HIST3H2BB	sp|Q16778|H2B2E_HUMAN Histone H2B type 2-E OS=Homo sapiens OX=9606 GN=H2BC21 PE=1 SV=3;sp|P33778|H2B1B_HUMAN Histone H2B type 1-B OS=Homo sapiens OX=9606 GN=H2BC3 PE=1 SV=2;sp|P23527|H2B1O_HUMAN Histone H2B type 1-O OS=Homo sapiens OX=9606 GN=H2BC17 PE=1 S	7	6	2	2	4	4	4	3	2	2	3	5	3	0	1	1	0	0	0	0	2	0	0	1	1	0	0	0	0	2	0	41.3	7.9	7.9	13.92	126	126;126;126;126;126;164;193	0	5.3512	33.3	34.1	34.1
I3L3Y6;I3L3F5	I3L3Y6;I3L3F5	5;4	1;1	1;1		MYO1C	tr|I3L3Y6|I3L3Y6_HUMAN Myosin IC (Fragment) OS=Homo sapiens OX=9606 GN=MYO1C PE=1 SV=1;tr|I3L3F5|I3L3F5_HUMAN Myosin IC (Fragment) OS=Homo sapiens OX=9606 GN=MYO1C PE=1 SV=8	2	5	1	1	4	2	4	1	0	1	3	4	5	1	1	1	0	0	0	1	1	1	1	1	1	0	0	0	1	1	1	30.6	4.7	4.7	19.507	170	170;137	0.0039841	1.7856	21.8	12.9	30.6
Q86V48;E5RFK8	Q86V48	13;1	13;1	13;1	Leucine zipper protein 1	LUZP1	sp|Q86V48|LUZP1_HUMAN Leucine zipper protein 1 OS=Homo sapiens OX=9606 GN=LUZP1 PE=1 SV=2	2	13	13	13	3	3	3	0	0	0	4	5	6	3	3	3	0	0	0	4	5	6	3	3	3	0	0	0	4	5	6	16.8	16.8	16.8	120.27	1076	1076;273	0	14.739	3.7	3.5	3.3
E7ERL0;J3KPD9;Q32Q12;P22392;P15531;C9K028;F6XY72;E5RHP0;O60361	E7ERL0;J3KPD9;Q32Q12;P22392;P15531;C9K028;F6XY72;E5RHP0;O60361	2;2;2;2;2;1;1;1;1	2;2;2;2;2;1;1;1;1	2;2;2;2;2;1;1;1;1	Nucleoside diphosphate kinase;Nucleoside diphosphate kinase B;Nucleoside diphosphate kinase A;Putative nucleoside diphosphate kinase	NME1;NME2;NME1-NME2;NME2P1	tr|E7ERL0|E7ERL0_HUMAN NME/NM23 nucleoside diphosphate kinase 1 OS=Homo sapiens OX=9606 GN=NME1 PE=1 SV=1;tr|J3KPD9|J3KPD9_HUMAN NME1-NME2 readthrough OS=Homo sapiens OX=9606 GN=NME1-NME2 PE=1 SV=1;tr|Q32Q12|Q32Q12_HUMAN Nucleoside diphosphate kinase OS=Ho	9	2	2	2	1	2	1	2	2	2	2	2	2	1	2	1	2	2	2	2	2	2	1	2	1	2	2	2	2	2	2	20.9	20.9	20.9	15.261	139	139;197;292;152;152;60;82;82;137	0	4.2132	8.6	20.9	8.6
D3YTB1;F8W727;P62910;D3YTI8	D3YTB1;F8W727;P62910	4;4;4;1	4;4;4;1	4;4;4;1	60S ribosomal protein L32	RPL32	tr|D3YTB1|D3YTB1_HUMAN Ribosomal protein L32 (Fragment) OS=Homo sapiens OX=9606 GN=RPL32 PE=1 SV=1;tr|F8W727|F8W727_HUMAN Ribosomal protein L32 OS=Homo sapiens OX=9606 GN=RPL32 PE=1 SV=1;sp|P62910|RL32_HUMAN 60S ribosomal protein L32 OS=Homo sapiens OX=960	4	4	4	4	2	3	4	0	0	0	0	1	0	2	3	4	0	0	0	0	1	0	2	3	4	0	0	0	0	1	0	31.6	31.6	31.6	15.616	133	133;153;135;62	0	4.0734	16.5	24.8	31.6
E7EXA8;E9PAL0;P10163	E7EXA8;E9PAL0;P10163	2;2;2	2;2;2	2;2;2	Basic salivary proline-rich protein 4;Protein N1;Glycosylated protein A;Peptide P-D	PRB4	tr|E7EXA8|E7EXA8_HUMAN Basic salivary proline-rich protein 4 OS=Homo sapiens OX=9606 GN=PRB4 PE=1 SV=2;tr|E9PAL0|E9PAL0_HUMAN Basic salivary proline-rich protein 4 OS=Homo sapiens OX=9606 GN=PRB4 PE=1 SV=1;sp|P10163|PRB4_HUMAN Basic salivary proline-rich p	3	2	2	2	0	0	0	0	0	0	2	2	2	0	0	0	0	0	0	2	2	2	0	0	0	0	0	0	2	2	2	13.5	13.5	13.5	18.011	178	178;247;310	0	14.434	0	0	0
A0A5F9ZHM4;P07195;A8MW50;A0A3B3IS95;F5H793;C9J7H8	A0A5F9ZHM4;P07195;A8MW50;A0A3B3IS95	4;4;2;2;1;1	3;3;1;1;1;1	3;3;1;1;1;1	L-lactate dehydrogenase B chain;L-lactate dehydrogenase	LDHB	tr|A0A5F9ZHM4|A0A5F9ZHM4_HUMAN L-lactate dehydrogenase OS=Homo sapiens OX=9606 GN=LDHB PE=1 SV=1;sp|P07195|LDHB_HUMAN L-lactate dehydrogenase B chain OS=Homo sapiens OX=9606 GN=LDHB PE=1 SV=2;tr|A8MW50|A8MW50_HUMAN L-lactate dehydrogenase (Fragment) OS=Hom	6	4	3	3	1	1	1	1	2	2	3	2	1	1	1	1	1	2	2	2	1	1	1	1	1	1	2	2	2	1	1	13.8	10.3	10.3	37.294	341	341;334;232;281;102;136	0	5.0451	2.6	2.6	2.6
P15144	P15144	7	7	7	Aminopeptidase N	ANPEP	sp|P15144|AMPN_HUMAN Aminopeptidase N OS=Homo sapiens OX=9606 GN=ANPEP PE=1 SV=4	1	7	7	7	2	2	1	2	2	3	2	3	2	2	2	1	2	2	3	2	3	2	2	2	1	2	2	3	2	3	2	6.5	6.5	6.5	109.54	967	967	0	8.187	2.9	2.9	0.8
P06733;A0A2R8Y6G6;K7EM90	P06733;A0A2R8Y6G6;K7EM90	2;2;1	2;2;1	2;2;1	Alpha-enolase;Enolase	ENO1	sp|P06733|ENOA_HUMAN Alpha-enolase OS=Homo sapiens OX=9606 GN=ENO1 PE=1 SV=2;tr|A0A2R8Y6G6|A0A2R8Y6G6_HUMAN phosphopyruvate hydratase OS=Homo sapiens OX=9606 GN=ENO1 PE=1 SV=1;tr|K7EM90|K7EM90_HUMAN phosphopyruvate hydratase (Fragment) OS=Homo sapiens OX=9	3	2	2	2	1	0	0	1	1	0	1	2	2	1	0	0	1	1	0	1	2	2	1	0	0	1	1	0	1	2	2	5.8	5.8	5.8	47.168	434	434;434;195	0	4.3822	3.5	0	0
H3BNE1;H3BR18;H3BM38;H3BPJ0;O00161;H3BR99	H3BNE1;H3BR18;H3BM38;H3BPJ0;O00161;H3BR99	2;2;2;2;2;1	2;2;2;2;2;1	2;2;2;2;2;1	Synaptosomal-associated protein;Synaptosomal-associated protein 23	SNAP23	tr|H3BNE1|H3BNE1_HUMAN Synaptosome associated protein 23 OS=Homo sapiens OX=9606 GN=SNAP23 PE=1 SV=1;tr|H3BR18|H3BR18_HUMAN Synaptosomal-associated protein (Fragment) OS=Homo sapiens OX=9606 GN=SNAP23 PE=1 SV=1;tr|H3BM38|H3BM38_HUMAN Synaptosomal-associate	6	2	2	2	2	2	2	0	0	0	1	1	1	2	2	2	0	0	0	1	1	1	2	2	2	0	0	0	1	1	1	28.9	28.9	28.9	11.14	97	97;109;125;127;211;90	0	4.8453	28.9	28.9	28.9
P00338;F5GXH2;F5GYU2;F5GXY2;Q6ZMR3	P00338	5;1;1;1;1	4;1;1;1;0	4;1;1;1;0	L-lactate dehydrogenase A chain	LDHA	sp|P00338|LDHA_HUMAN L-lactate dehydrogenase A chain OS=Homo sapiens OX=9606 GN=LDHA PE=1 SV=2	5	5	4	4	4	3	1	1	1	0	3	3	2	4	3	1	1	1	0	2	2	2	4	3	1	1	1	0	2	2	2	15.4	11.7	11.7	36.688	332	332;114;144;156;332	0	6.1561	11.7	8.7	3
F8WD59;C9J9K3;A0A8V8TMX1;A0A8I5KQE6;A0A0C4DG17;A0A8V8TLA4;P08865;A0A8V8TMZ8	F8WD59;C9J9K3;A0A8V8TMX1;A0A8I5KQE6;A0A0C4DG17;A0A8V8TLA4;P08865	3;3;3;3;3;3;3;1	3;3;3;3;3;3;3;1	3;3;3;3;3;3;3;1	40S ribosomal protein SA	RPSA	tr|F8WD59|F8WD59_HUMAN Ribosomal protein SA (Fragment) OS=Homo sapiens OX=9606 GN=RPSA PE=1 SV=2;tr|C9J9K3|C9J9K3_HUMAN 40S ribosomal protein SA (Fragment) OS=Homo sapiens OX=9606 GN=RPSA PE=1 SV=8;tr|A0A8V8TMX1|A0A8V8TMX1_HUMAN Ribosomal protein SA OS=Hom	8	3	3	3	1	1	2	2	1	1	1	3	3	1	1	2	2	1	1	1	3	3	1	1	2	2	1	1	1	3	3	39.7	39.7	39.7	12.647	116	116;263;274;295;300;331;295;45	0	9.9746	14.7	11.2	25.9
P07948;H0Y3C5;J3KPD6;P08631	P07948	4;1;1;1	4;1;1;1	4;1;1;1	Tyrosine-protein kinase Lyn	LYN	sp|P07948|LYN_HUMAN Tyrosine-protein kinase Lyn OS=Homo sapiens OX=9606 GN=LYN PE=1 SV=3	4	4	4	4	4	2	3	0	0	0	3	2	1	4	2	3	0	0	0	3	2	1	4	2	3	0	0	0	3	2	1	9.2	9.2	9.2	58.573	512	512;525;526;526	0	4.6573	9.2	4.3	6.4
P31944	P31944	2	2	2	Caspase-14;Caspase-14 subunit p17, mature form;Caspase-14 subunit p10, mature form;Caspase-14 subunit p20, intermediate form;Caspase-14 subunit p8, intermediate form	CASP14	sp|P31944|CASPE_HUMAN Caspase-14 OS=Homo sapiens OX=9606 GN=CASP14 PE=1 SV=2	1	2	2	2	1	1	1	1	2	2	1	1	1	1	1	1	1	2	2	1	1	1	1	1	1	1	2	2	1	1	1	9.1	9.1	9.1	27.679	242	242	0	16.362	4.5	4.5	4.5
Q9NZT1	Q9NZT1	1	1	1	Calmodulin-like protein 5	CALML5	sp|Q9NZT1|CALL5_HUMAN Calmodulin-like protein 5 OS=Homo sapiens OX=9606 GN=CALML5 PE=1 SV=2	1	1	1	1	1	0	1	1	0	1	1	1	1	1	0	1	1	0	1	1	1	1	1	0	1	1	0	1	1	1	1	9.6	9.6	9.6	15.892	146	146	0	3.0808	9.6	0	9.6
P13797;H7C4N2;U3KQI3;Q5TBN3;Q14651;C9JAM8	P13797	7;3;2;2;2;1	7;3;2;2;2;1	5;3;0;0;2;1	Plastin-3	PLS3	sp|P13797|PLST_HUMAN Plastin-3 OS=Homo sapiens OX=9606 GN=PLS3 PE=1 SV=4	6	7	7	5	4	3	3	0	0	0	3	4	3	4	3	3	0	0	0	3	4	3	3	3	3	0	0	0	2	3	2	12.5	12.5	9	70.81	630	630;190;164;246;629;266	0	9.0987	8.4	5.7	5.7
H7BXY5;Q0ZGT2;E7ETM8;E7EUA0	H7BXY5;Q0ZGT2;E7ETM8;E7EUA0	3;3;2;2	3;3;2;2	3;3;2;2	Nexilin	NEXN	tr|H7BXY5|H7BXY5_HUMAN Nexilin F-actin binding protein (Fragment) OS=Homo sapiens OX=9606 GN=NEXN PE=1 SV=1;sp|Q0ZGT2|NEXN_HUMAN Nexilin OS=Homo sapiens OX=9606 GN=NEXN PE=1 SV=1;tr|E7ETM8|E7ETM8_HUMAN Nexilin F-actin binding protein (Fragment) OS=Homo sap	4	3	3	3	1	1	1	0	0	0	3	2	2	1	1	1	0	0	0	3	2	2	1	1	1	0	0	0	3	2	2	6.6	6.6	6.6	68.814	576	576;675;321;435	0	7.2598	1.9	1.9	1.9
Q96PK6;A0A0A6YYI9;F8WDX3;A0A0A0MSL8;B8ZZ74	Q96PK6	5;2;2;2;2	5;2;2;2;2	5;2;2;2;2	RNA-binding protein 14	RBM14	sp|Q96PK6|RBM14_HUMAN RNA-binding protein 14 OS=Homo sapiens OX=9606 GN=RBM14 PE=1 SV=2	5	5	5	5	5	3	3	0	0	0	3	2	3	5	3	3	0	0	0	3	2	3	5	3	3	0	0	0	3	2	3	9.6	9.6	9.6	69.491	669	669;118;129;147;159	0	6.4278	9.6	5.8	5.2
Q15393	Q15393	4	4	4	Splicing factor 3B subunit 3	SF3B3	sp|Q15393|SF3B3_HUMAN Splicing factor 3B subunit 3 OS=Homo sapiens OX=9606 GN=SF3B3 PE=1 SV=4	1	4	4	4	2	3	3	1	0	1	3	3	1	2	3	3	1	0	1	3	3	1	2	3	3	1	0	1	3	3	1	4.7	4.7	4.7	135.58	1217	1217	0	8.1743	2.5	3.5	3.5
A0A1B0GV06;A0A1B0GTP7;A0A1B0GUE3;A0A1B0GUG1;A0A1B0GUW4;E7EMM4;A0A1B0GW68;A0A1B0GUA4;A0A1B0GTM3;A0A1B0GTZ5;A0A1B0GUH5;Q13510	A0A1B0GV06;A0A1B0GTP7;A0A1B0GUE3;A0A1B0GUG1;A0A1B0GUW4;E7EMM4;A0A1B0GW68;A0A1B0GUA4;A0A1B0GTM3;A0A1B0GTZ5;A0A1B0GUH5;Q13510	2;2;2;2;2;2;2;2;2;2;2;2	2;2;2;2;2;2;2;2;2;2;2;2	2;2;2;2;2;2;2;2;2;2;2;2	Acid ceramidase;Acid ceramidase subunit alpha;Acid ceramidase subunit beta	ASAH1	tr|A0A1B0GV06|A0A1B0GV06_HUMAN N-acylsphingosine amidohydrolase 1 (Fragment) OS=Homo sapiens OX=9606 GN=ASAH1 PE=1 SV=1;tr|A0A1B0GTP7|A0A1B0GTP7_HUMAN N-acylsphingosine amidohydrolase 1 OS=Homo sapiens OX=9606 GN=ASAH1 PE=1 SV=1;tr|A0A1B0GUE3|A0A1B0GUE3_HU	12	2	2	2	1	0	1	0	0	1	1	2	2	1	0	1	0	0	1	1	2	2	1	0	1	0	0	1	1	2	2	10.5	10.5	10.5	22.837	200	200;288;330;366;368;370;374;375;376;386;393;395	0	2.7487	5	0	5
P05089;A0A5F9ZH78;A0A5F9ZGN6	P05089;A0A5F9ZH78	4;3;1	4;3;1	4;3;1	Arginase-1	ARG1	sp|P05089|ARGI1_HUMAN Arginase-1 OS=Homo sapiens OX=9606 GN=ARG1 PE=1 SV=2;tr|A0A5F9ZH78|A0A5F9ZH78_HUMAN Arginase 1 OS=Homo sapiens OX=9606 GN=ARG1 PE=1 SV=1	3	4	4	4	1	1	2	1	1	1	1	1	1	1	1	2	1	1	1	1	1	1	1	1	2	1	1	1	1	1	1	10.6	10.6	10.6	34.735	322	322;237;304	0	3.8074	3.4	3.4	6.8
P06702	P06702	2	2	2	Protein S100-A9	S100A9	sp|P06702|S10A9_HUMAN Protein S100-A9 OS=Homo sapiens OX=9606 GN=S100A9 PE=1 SV=1	1	2	2	2	1	1	2	1	1	1	1	1	1	1	1	2	1	1	1	1	1	1	1	1	2	1	1	1	1	1	1	24.6	24.6	24.6	13.242	114	114	0	4.3035	11.4	11.4	24.6
A0A087X2D0;P84103	A0A087X2D0;P84103	3;3	3;3	3;3	Serine/arginine-rich splicing factor 3	SRSF3	tr|A0A087X2D0|A0A087X2D0_HUMAN Serine and arginine rich splicing factor 3 OS=Homo sapiens OX=9606 GN=SRSF3 PE=1 SV=1;sp|P84103|SRSF3_HUMAN Serine/arginine-rich splicing factor 3 OS=Homo sapiens OX=9606 GN=SRSF3 PE=1 SV=1	2	3	3	3	1	2	2	0	2	0	2	2	0	1	2	2	0	2	0	2	2	0	1	2	2	0	2	0	2	2	0	27.4	27.4	27.4	10.32	95	95;164	0	5.24	17.9	27.4	27.4
B4DJ75;A0A8V8TQ71;P62140;A0A8V8TRH9;H0Y3Y6;C9J9S3;C9JP48	B4DJ75;A0A8V8TQ71;P62140;A0A8V8TRH9;H0Y3Y6	8;8;8;7;4;2;2	3;3;3;3;1;1;1	3;3;3;3;1;1;1	Serine/threonine-protein phosphatase;Serine/threonine-protein phosphatase PP1-beta catalytic subunit	PPP1CB	tr|B4DJ75|B4DJ75_HUMAN Serine/threonine-protein phosphatase OS=Homo sapiens OX=9606 GN=PPP1CB PE=1 SV=1;tr|A0A8V8TQ71|A0A8V8TQ71_HUMAN Serine/threonine-protein phosphatase OS=Homo sapiens OX=9606 GN=PPP1CB PE=1 SV=1;sp|P62140|PP1B_HUMAN Serine/threonine-pr	7	8	3	3	7	6	7	0	0	0	0	1	1	3	3	3	0	0	0	0	1	1	3	3	3	0	0	0	0	1	1	32.1	14	14	34.121	299	299;316;327;368;207;125;138	0	6.9362	26.1	25.8	28.8
C9J126;P19022;A0A6Q8PHJ8;C9JMH2;A0A6Q8PF58	C9J126;P19022;A0A6Q8PHJ8;C9JMH2;A0A6Q8PF58	3;3;2;2;2	3;3;2;2;2	3;3;2;2;2	Cadherin-2	CDH2	tr|C9J126|C9J126_HUMAN Cadherin 2 OS=Homo sapiens OX=9606 GN=CDH2 PE=1 SV=2;sp|P19022|CADH2_HUMAN Cadherin-2 OS=Homo sapiens OX=9606 GN=CDH2 PE=1 SV=4;tr|A0A6Q8PHJ8|A0A6Q8PHJ8_HUMAN Cadherin 2 (Fragment) OS=Homo sapiens OX=9606 GN=CDH2 PE=1 SV=1;tr|C9JMH2|	5	3	3	3	2	2	3	0	0	0	0	0	1	2	2	3	0	0	0	0	0	1	2	2	3	0	0	0	0	0	1	4.6	4.6	4.6	90.672	821	821;906;394;691;733	0	4.1353	3.5	3.5	4.6
A0A8Q3WLI9;E9PKC0;A0A8V8TMS3;Q6IQ23;H0YDE2;A0A1B0GTN9;A0A1B0GUN0;E9PL74;A0A1B0GUM1;E9PIK1	A0A8Q3WLI9;E9PKC0;A0A8V8TMS3;Q6IQ23;H0YDE2;A0A1B0GTN9;A0A1B0GUN0	8;8;8;8;7;7;4;2;2;1	8;8;8;8;7;7;4;2;2;1	8;8;8;8;7;7;4;2;2;1	Pleckstrin homology domain-containing family A member 7	PLEKHA7	tr|A0A8Q3WLI9|A0A8Q3WLI9_HUMAN Pleckstrin homology domain containing A7 OS=Homo sapiens OX=9606 GN=PLEKHA7 PE=1 SV=1;tr|E9PKC0|E9PKC0_HUMAN Pleckstrin homology domain containing A7 OS=Homo sapiens OX=9606 GN=PLEKHA7 PE=1 SV=1;tr|A0A8V8TMS3|A0A8V8TMS3_HUMAN	10	8	8	8	3	4	3	0	0	0	5	5	2	3	4	3	0	0	0	5	5	2	3	4	3	0	0	0	5	5	2	8.5	8.5	8.5	122.24	1078	1078;1271;1272;1121;753;1192;527;152;519;123	0	8.0533	3.2	5.1	3.2
A0A8I5KND9;A0A8I5KYZ4;A0A8I5KNP3;A0A8I5KNN2;Q9NR30;Q9BQ39	A0A8I5KND9;A0A8I5KYZ4;A0A8I5KNP3;A0A8I5KNN2;Q9NR30	5;5;5;5;5;2	5;5;5;5;5;2	5;5;5;5;5;2	Nucleolar RNA helicase 2	DDX21	tr|A0A8I5KND9|A0A8I5KND9_HUMAN RNA helicase OS=Homo sapiens OX=9606 GN=DDX21 PE=1 SV=1;tr|A0A8I5KYZ4|A0A8I5KYZ4_HUMAN RNA helicase OS=Homo sapiens OX=9606 GN=DDX21 PE=1 SV=1;tr|A0A8I5KNP3|A0A8I5KNP3_HUMAN RNA helicase OS=Homo sapiens OX=9606 GN=DDX21 PE=1	6	5	5	5	3	2	1	0	0	0	1	4	3	3	2	1	0	0	0	1	4	3	3	2	1	0	0	0	1	4	3	9.8	9.8	9.8	73.889	661	661;729;768;808;783;737	0	5.1035	5.7	3.9	1.7
A0A0G2JRN3;A0A024R6I7;P01009	A0A0G2JRN3;A0A024R6I7;P01009	2;2;2	2;2;2	2;2;2	Alpha-1-antitrypsin;Short peptide from AAT	SERPINA1	tr|A0A0G2JRN3|A0A0G2JRN3_HUMAN Alpha-1-antitrypsin OS=Homo sapiens OX=9606 GN=SERPINA1 PE=1 SV=1;tr|A0A024R6I7|A0A024R6I7_HUMAN Alpha-1-antitrypsin OS=Homo sapiens OX=9606 GN=SERPINA1 PE=1 SV=1;sp|P01009|A1AT_HUMAN Alpha-1-antitrypsin OS=Homo sapiens OX=96	3	2	2	2	1	1	1	1	1	2	1	1	1	1	1	1	1	1	2	1	1	1	1	1	1	1	1	2	1	1	1	7.2	7.2	7.2	40.234	359	359;418;418	0	8.8815	5	5	5
C9JMH6;A0A0J9YY65;P08697;C9JPV4;A0A0J9YWQ3;A0A0G2JPA8;CON__P28800	C9JMH6;A0A0J9YY65;P08697;C9JPV4;A0A0J9YWQ3;A0A0G2JPA8	3;3;3;2;2;2;1	3;3;3;2;2;2;1	3;3;3;2;2;2;1	Alpha-2-antiplasmin	SERPINF2	tr|C9JMH6|C9JMH6_HUMAN Alpha-2-antiplasmin (Fragment) OS=Homo sapiens OX=9606 GN=SERPINF2 PE=1 SV=1;tr|A0A0J9YY65|A0A0J9YY65_HUMAN Alpha-2-antiplasmin (Fragment) OS=Homo sapiens OX=9606 GN=SERPINF2 PE=1 SV=1;sp|P08697|A2AP_HUMAN Alpha-2-antiplasmin OS=Homo	7	3	3	3	1	0	1	1	2	1	1	2	2	1	0	1	1	2	1	1	2	2	1	0	1	1	2	1	1	2	2	13.3	13.3	13.3	27.823	255	255;255;491;264;264;427;492	0	8.9488	5.1	0	5.1
Q5JWE9;A0A7I2V5R6;P63092;Q5JWF2;A0A590UJY2;A0A804HIH4;A0A590UJF0;A0A590UK28;B0AZR9;A0A590UJQ9;A0A0A0MR13;A0A590UJS2	Q5JWE9;A0A7I2V5R6;P63092;Q5JWF2;A0A590UJY2;A0A804HIH4;A0A590UJF0;A0A590UK28;B0AZR9;A0A590UJQ9;A0A0A0MR13;A0A590UJS2	5;5;5;5;4;4;4;4;4;4;4;4	4;4;4;4;4;4;4;4;4;4;4;3	4;4;4;4;4;4;4;4;4;4;4;3	Guanine nucleotide-binding protein G(s) subunit alpha isoforms short;Guanine nucleotide-binding protein G(s) subunit alpha isoforms XLas	GNAS	tr|Q5JWE9|Q5JWE9_HUMAN GNAS complex locus OS=Homo sapiens OX=9606 GN=GNAS PE=1 SV=3;tr|A0A7I2V5R6|A0A7I2V5R6_HUMAN GNAS complex locus OS=Homo sapiens OX=9606 GN=GNAS PE=1 SV=2;sp|P63092|GNAS2_HUMAN Guanine nucleotide-binding protein G(s) subunit alpha isof	12	5	4	4	5	2	3	1	1	0	3	2	2	4	1	2	0	0	0	2	1	1	4	1	2	0	0	0	2	1	1	5.4	4.3	4.3	109.54	1022	1022;1038;394;1037;237;285;320;321;335;336;362;368	0	4.2983	5.4	2	3.5
A0A2R8YGX3;A0A2R8Y5V9;P67936;A0A2R8YEU4;A0A2R8YE05;K7ENT6;A0A2R8YHD2;A0A5F9UN72;A0A590UJB9;A0A590UK79	A0A2R8YGX3;A0A2R8Y5V9;P67936;A0A2R8YEU4;A0A2R8YE05;K7ENT6;A0A2R8YHD2	14;14;14;11;11;11;11;4;3;3	6;6;6;3;3;3;3;3;3;3	5;5;5;2;2;2;2;2;3;3	Tropomyosin alpha-4 chain	TPM4	tr|A0A2R8YGX3|A0A2R8YGX3_HUMAN Tropomyosin 4 OS=Homo sapiens OX=9606 GN=TPM4 PE=1 SV=1;tr|A0A2R8Y5V9|A0A2R8Y5V9_HUMAN Tropomyosin 4 OS=Homo sapiens OX=9606 GN=TPM4 PE=1 SV=1;sp|P67936|TPM4_HUMAN Tropomyosin alpha-4 chain OS=Homo sapiens OX=9606 GN=TPM4 PE=	10	14	6	5	13	11	10	2	2	2	5	5	3	6	4	4	0	0	0	1	1	0	5	3	3	0	0	0	1	1	0	52.5	25.1	25.1	20.985	183	183;248;248;173;226;245;248;158;44;56	0	8.8133	52.5	49.2	41
A0A7P0TAY2;A0A7P0T917;A0A087WT78;A0A7P0TAE1;H0YIV0;A0A7P0T823;A0A7P0TAT8;P14625;A0A7P0TBC2;A0A7P0T8R3;A0A7P0T885;Q58FF3	A0A7P0TAY2;A0A7P0T917;A0A087WT78;A0A7P0TAE1;H0YIV0;A0A7P0T823;A0A7P0TAT8;P14625;A0A7P0TBC2	7;7;7;7;7;7;7;7;5;3;3;1	5;5;5;5;5;5;5;5;3;1;1;1	5;5;5;5;5;5;5;5;3;1;1;1	Endoplasmin	HSP90B1	tr|A0A7P0TAY2|A0A7P0TAY2_HUMAN Heat shock protein 90 beta family member 1 OS=Homo sapiens OX=9606 GN=HSP90B1 PE=1 SV=1;tr|A0A7P0T917|A0A7P0T917_HUMAN Heat shock protein 90 beta family member 1 OS=Homo sapiens OX=9606 GN=HSP90B1 PE=1 SV=1;tr|A0A087WT78|A0A0	12	7	5	5	3	2	1	2	1	1	3	4	3	2	1	0	1	0	0	2	3	2	2	1	0	1	0	0	2	3	2	10.3	8.2	8.2	76.368	661	661;719;751;789;796;813;814;803;465;251;274;399	0	3.9547	5.7	3.6	2.1
A0A6Q8PFK8;A0A6Q8PGK1;P04792;A0A6Q8PFE7;A0A6Q8PF43;A0A6Q8PHJ6;A0A6Q8PHA6;A0A6Q8PH65;A0A6Q8PGY2;C9J3N8	A0A6Q8PFK8;A0A6Q8PGK1;P04792;A0A6Q8PFE7;A0A6Q8PF43;A0A6Q8PHJ6;A0A6Q8PHA6;A0A6Q8PH65;A0A6Q8PGY2	3;3;3;2;2;2;2;2;2;1	3;3;3;2;2;2;2;2;2;1	3;3;3;2;2;2;2;2;2;1	Heat shock protein beta-1	HSPB1	tr|A0A6Q8PFK8|A0A6Q8PFK8_HUMAN Heat shock protein family B (small) member 1 OS=Homo sapiens OX=9606 GN=HSPB1 PE=1 SV=1;tr|A0A6Q8PGK1|A0A6Q8PGK1_HUMAN Heat shock protein beta-1 OS=Homo sapiens OX=9606 GN=HSPB1 PE=1 SV=1;sp|P04792|HSPB1_HUMAN Heat shock prot	10	3	3	3	2	1	3	0	1	0	0	0	0	2	1	3	0	1	0	0	0	0	2	1	3	0	1	0	0	0	0	21.7	21.7	21.7	21.882	198	198;215;205;122;141;143;157;162;174;37	0	5.2344	13.6	8.1	21.7
P06858	P06858	2	2	2	Lipoprotein lipase	LPL	sp|P06858|LIPL_HUMAN Lipoprotein lipase OS=Homo sapiens OX=9606 GN=LPL PE=1 SV=1	1	2	2	2	1	1	2	1	2	1	0	1	1	1	1	2	1	2	1	0	1	1	1	1	2	1	2	1	0	1	1	6.1	6.1	6.1	53.162	475	475	0	32.518	4	4	6.1
Q6UWP8	Q6UWP8	4	4	4	Suprabasin	SBSN	sp|Q6UWP8|SBSN_HUMAN Suprabasin OS=Homo sapiens OX=9606 GN=SBSN PE=1 SV=2	1	4	4	4	1	1	1	4	1	1	0	0	0	1	1	1	4	1	1	0	0	0	1	1	1	4	1	1	0	0	0	19.7	19.7	19.7	60.54	590	590	0	30.704	6.1	6.1	6.1
A0A804HIL4;A0A804HK15;A0A669KB05;C9JZR2;H0YC95;O60716;A0A804HJM1;A0A669KB62	A0A804HIL4;A0A804HK15;A0A669KB05;C9JZR2;H0YC95;O60716;A0A804HJM1;A0A669KB62	4;4;4;4;4;4;3;3	4;4;4;4;4;4;3;3	4;4;4;4;4;4;3;3	Catenin delta-1	CTNND1	tr|A0A804HIL4|A0A804HIL4_HUMAN Catenin delta 1 OS=Homo sapiens OX=9606 GN=CTNND1 PE=1 SV=1;tr|A0A804HK15|A0A804HK15_HUMAN Catenin delta 1 OS=Homo sapiens OX=9606 GN=CTNND1 PE=1 SV=1;tr|A0A669KB05|A0A669KB05_HUMAN Catenin delta 1 OS=Homo sapiens OX=9606 GN=	8	4	4	4	2	1	1	0	0	0	2	2	0	2	1	1	0	0	0	2	2	0	2	1	1	0	0	0	2	2	0	16.2	16.2	16.2	42.655	382	382;383;915;938;940;968;279;888	0	8.9765	7.1	3.9	3.9
Q08554	Q08554	3	3	3	Desmocollin-1	DSC1	sp|Q08554|DSC1_HUMAN Desmocollin-1 OS=Homo sapiens OX=9606 GN=DSC1 PE=1 SV=2	1	3	3	3	2	1	1	2	1	1	0	1	0	2	1	1	2	1	1	0	1	0	2	1	1	2	1	1	0	1	0	4.4	4.4	4.4	99.986	894	894	0	3.6496	3.2	1.1	1.7
F8W787;A0A1B0GW44;A0A1B0GVP3;A0A1B0GV23;A0A1B0GVD5;A0A1B0GWE8;C9JH19;P07339;F8WD96;H7C469;A0A1B0GU92;A0A1B0GU03	F8W787;A0A1B0GW44;A0A1B0GVP3;A0A1B0GV23;A0A1B0GVD5;A0A1B0GWE8;C9JH19;P07339;F8WD96;H7C469;A0A1B0GU92;A0A1B0GU03	2;2;2;2;2;2;2;2;1;1;1;1	2;2;2;2;2;2;2;2;1;1;1;1	2;2;2;2;2;2;2;2;1;1;1;1	Cathepsin D;Cathepsin D light chain;Cathepsin D heavy chain	CTSD	tr|F8W787|F8W787_HUMAN Cathepsin D OS=Homo sapiens OX=9606 GN=CTSD PE=1 SV=2;tr|A0A1B0GW44|A0A1B0GW44_HUMAN Cathepsin D OS=Homo sapiens OX=9606 GN=CTSD PE=1 SV=1;tr|A0A1B0GVP3|A0A1B0GVP3_HUMAN Cathepsin D OS=Homo sapiens OX=9606 GN=CTSD PE=1 SV=1;tr|A0A1B0	12	2	2	2	1	1	1	0	1	2	2	2	1	1	1	1	0	1	2	2	2	1	1	1	1	0	1	2	2	2	1	6.9	6.9	6.9	40.783	377	377;405;405;406;409;410;451;412;276;336;557;582	0	4.1096	4.8	2.1	4.8
P60174;U3KPZ0;U3KPS5;U3KQF3	P60174;U3KPZ0	4;2;1;1	4;2;1;1	4;2;1;1	Triosephosphate isomerase	TPI1	sp|P60174|TPIS_HUMAN Triosephosphate isomerase OS=Homo sapiens OX=9606 GN=TPI1 PE=1 SV=4;tr|U3KPZ0|U3KPZ0_HUMAN Triosephosphate isomerase (Fragment) OS=Homo sapiens OX=9606 GN=TPI1 PE=1 SV=1	4	4	4	4	2	1	2	2	2	2	2	1	2	2	1	2	2	2	2	2	1	2	2	1	2	2	2	2	2	1	2	19.3	19.3	19.3	26.669	249	249;113;38;98	0	6.9159	9.2	5.2	10.4
P42766;F2Z388	P42766;F2Z388	4;3	4;3	4;3	60S ribosomal protein L35	RPL35	sp|P42766|RL35_HUMAN 60S ribosomal protein L35 OS=Homo sapiens OX=9606 GN=RPL35 PE=1 SV=2;tr|F2Z388|F2Z388_HUMAN 60S ribosomal protein L35 OS=Homo sapiens OX=9606 GN=RPL35 PE=1 SV=1	2	4	4	4	1	2	1	0	0	0	1	0	1	1	2	1	0	0	0	1	0	1	1	2	1	0	0	0	1	0	1	29.3	29.3	29.3	14.551	123	123;96	0	4.1974	10.6	17.9	10.6
Q96H55;B4DSL5	Q96H55	4;1	4;1	4;1	Unconventional myosin-XIX	MYO19	sp|Q96H55|MYO19_HUMAN Unconventional myosin-XIX OS=Homo sapiens OX=9606 GN=MYO19 PE=1 SV=2	2	4	4	4	3	4	3	0	0	0	1	1	0	3	4	3	0	0	0	1	1	0	3	4	3	0	0	0	1	1	0	4.5	4.5	4.5	109.13	970	970;183	0	7.0476	3.6	4.5	3.6
A0A6Q8PGF3;A0A6Q8PFP1;A0A6Q8PH39;A0A6Q8PG79;A0A6Q8PGL5;A0A6Q8PFB0;A0A6Q8PGG4	A0A6Q8PGF3;A0A6Q8PFP1;A0A6Q8PH39;A0A6Q8PG79;A0A6Q8PGL5;A0A6Q8PFB0;A0A6Q8PGG4	1;1;1;1;1;1;1	1;1;1;1;1;1;1	1;1;1;1;1;1;1			tr|A0A6Q8PGF3|A0A6Q8PGF3_HUMAN Tripartite motif containing 2 OS=Homo sapiens OX=9606 GN=TRIM2 PE=4 SV=1;tr|A0A6Q8PFP1|A0A6Q8PFP1_HUMAN Tripartite motif containing 2 OS=Homo sapiens OX=9606 GN=TRIM2 PE=1 SV=1;tr|A0A6Q8PH39|A0A6Q8PH39_HUMAN Tripartite motif	7	1	1	1	1	0	0	0	0	0	0	0	1	1	0	0	0	0	0	0	0	1	1	0	0	0	0	0	0	0	1	17.3	17.3	17.3	10.988	98	98;156;374;650;742;761;765	0.0076775	1.5939	17.3	0	0
P68371;P04350;Q3ZCM7;M0R0X0;M0QY85;M0QY37;M0QX14;A0A075B724;M0QZL7;M0R278	P68371;P04350;Q3ZCM7	10;7;6;1;1;1;1;1;1;1	2;1;1;1;1;1;1;1;1;1	2;1;1;1;1;1;1;1;1;1	Tubulin beta-4B chain;Tubulin beta-4A chain;Tubulin beta-8 chain	TUBB4B;TUBB4A;TUBB8	sp|P68371|TBB4B_HUMAN Tubulin beta-4B chain OS=Homo sapiens OX=9606 GN=TUBB4B PE=1 SV=1;sp|P04350|TBB4A_HUMAN Tubulin beta-4A chain OS=Homo sapiens OX=9606 GN=TUBB4A PE=1 SV=2;sp|Q3ZCM7|TBB8_HUMAN Tubulin beta-8 chain OS=Homo sapiens OX=9606 GN=TUBB8 PE=1	10	10	2	2	7	6	7	3	1	1	4	5	5	1	2	1	1	0	0	1	1	1	1	2	1	1	0	0	1	1	1	23.4	6.1	6.1	49.83	445	445;444;444;103;107;109;110;119;157;167	0	4.2631	16.2	13.5	15.5
P55084;C9JEY0;C9JE81;B5MD38;C9K0M0;F5GZQ3	P55084;C9JEY0;C9JE81;B5MD38;C9K0M0;F5GZQ3	4;3;3;3;2;2	4;3;3;3;2;2	4;3;3;3;2;2	Trifunctional enzyme subunit beta, mitochondrial;3-ketoacyl-CoA thiolase	HADHB	sp|P55084|ECHB_HUMAN Trifunctional enzyme subunit beta, mitochondrial OS=Homo sapiens OX=9606 GN=HADHB PE=1 SV=3;tr|C9JEY0|C9JEY0_HUMAN Hydroxyacyl-CoA dehydrogenase trifunctional multienzyme complex subunit beta (Fragment) OS=Homo sapiens OX=9606 GN=HADHB	6	4	4	4	2	2	2	0	0	0	0	1	0	2	2	2	0	0	0	0	1	0	2	2	2	0	0	0	0	1	0	8	8	8	51.294	474	474;149;175;351;84;459	0	6.0845	4.2	3.8	3.8
Q8IY63	Q8IY63	9	5	5	Angiomotin-like protein 1	AMOTL1	sp|Q8IY63|AMOL1_HUMAN Angiomotin-like protein 1 OS=Homo sapiens OX=9606 GN=AMOTL1 PE=1 SV=1	1	9	5	5	5	3	6	0	0	0	3	3	3	2	1	2	0	0	0	2	3	3	2	1	2	0	0	0	2	3	3	9.4	6.1	6.1	106.57	956	956	0	10.014	4.8	3.8	5.5
B1AHC9;P12956	B1AHC9;P12956	7;7	7;7	7;7	X-ray repair cross-complementing protein 6	XRCC6	tr|B1AHC9|B1AHC9_HUMAN X-ray repair cross complementing 6 OS=Homo sapiens OX=9606 GN=XRCC6 PE=1 SV=1;sp|P12956|XRCC6_HUMAN X-ray repair cross-complementing protein 6 OS=Homo sapiens OX=9606 GN=XRCC6 PE=1 SV=2	2	7	7	7	4	1	5	0	0	0	0	0	0	4	1	5	0	0	0	0	0	0	4	1	5	0	0	0	0	0	0	17	17	17	64.283	559	559;609	0	11.376	10.6	1.8	12
P25311;C9JEV0	P25311;C9JEV0	3;2	3;2	3;2	Zinc-alpha-2-glycoprotein	AZGP1	sp|P25311|ZA2G_HUMAN Zinc-alpha-2-glycoprotein OS=Homo sapiens OX=9606 GN=AZGP1 PE=1 SV=2;tr|C9JEV0|C9JEV0_HUMAN Alpha-2-glycoprotein 1, zinc-binding OS=Homo sapiens OX=9606 GN=AZGP1 PE=1 SV=1	2	3	3	3	2	2	2	0	1	0	0	0	1	2	2	2	0	1	0	0	0	1	2	2	2	0	1	0	0	0	1	11.4	11.4	11.4	34.258	298	298;227	0	3.6309	8.1	7.4	7.4
A0A3B3ITT5;P47914	A0A3B3ITT5;P47914	1;1	1;1	1;1	60S ribosomal protein L29	RPL29	tr|A0A3B3ITT5|A0A3B3ITT5_HUMAN 60S ribosomal protein L29 OS=Homo sapiens OX=9606 GN=RPL29 PE=1 SV=1;sp|P47914|RL29_HUMAN 60S ribosomal protein L29 OS=Homo sapiens OX=9606 GN=RPL29 PE=1 SV=2	2	1	1	1	1	0	1	0	1	1	0	0	1	1	0	1	0	1	1	0	0	1	1	0	1	0	1	1	0	0	1	9	9	9	18.512	167	167;159	0.0021882	2.3035	9	0	9
A0A087WXM6;J3QQT2;J3KRX5;A0A0A6YYL6;P18621;A0A087WY81;J3KRB3;A0A087WWH0;J3QS96;J3QLC8;A0A0A0MRF8;J3KSJ0	A0A087WXM6;J3QQT2;J3KRX5;A0A0A6YYL6;P18621;A0A087WY81;J3KRB3;A0A087WWH0;J3QS96;J3QLC8;A0A0A0MRF8	5;5;5;5;5;4;4;4;4;4;4;2	5;5;5;5;5;4;4;4;4;4;4;2	5;5;5;5;5;4;4;4;4;4;4;2	60S ribosomal protein L17	RPL17;RPL17-C18orf32	tr|A0A087WXM6|A0A087WXM6_HUMAN 60S ribosomal protein L17 (Fragment) OS=Homo sapiens OX=9606 GN=RPL17 PE=3 SV=1;tr|J3QQT2|J3QQT2_HUMAN 60S ribosomal protein L17 (Fragment) OS=Homo sapiens OX=9606 GN=RPL17 PE=3 SV=1;tr|J3KRX5|J3KRX5_HUMAN 60S ribosomal prote	12	5	5	5	3	2	2	0	0	0	1	1	1	3	2	2	0	0	0	1	1	1	3	2	2	0	0	0	1	1	1	26	26	26	19.586	169	169;171;174;228;184;97;129;131;138;174;190;56	0	6.9575	12.4	6.5	6.5
Q9ULJ8	Q9ULJ8	5	5	5	Neurabin-1	PPP1R9A	sp|Q9ULJ8|NEB1_HUMAN Neurabin-1 OS=Homo sapiens OX=9606 GN=PPP1R9A PE=1 SV=2	1	5	5	5	3	3	3	0	0	0	1	0	1	3	3	3	0	0	0	1	0	1	3	3	3	0	0	0	1	0	1	5.2	5.2	5.2	123.34	1098	1098	0	8.4761	2.9	3.2	2.9
Q9UBI6	Q9UBI6	2	2	2	Guanine nucleotide-binding protein G(I)/G(S)/G(O) subunit gamma-12	GNG12	sp|Q9UBI6|GBG12_HUMAN Guanine nucleotide-binding protein G(I)/G(S)/G(O) subunit gamma-12 OS=Homo sapiens OX=9606 GN=GNG12 PE=1 SV=3	1	2	2	2	0	0	0	0	0	0	1	2	1	0	0	0	0	0	0	1	2	1	0	0	0	0	0	0	1	2	1	37.5	37.5	37.5	8.0061	72	72	0	11.701	0	0	0
A0A2U3TZY2;Q9H078;A0A2R8Y602;A0A2R8Y6R5;F5H392;F5H7A5;A0A2R8Y7E8;A0A2R8YDH5;H0YGM0	A0A2U3TZY2;Q9H078;A0A2R8Y602	7;7;4;3;2;2;2;1;1	7;7;4;3;2;2;2;1;1	7;7;4;3;2;2;2;1;1	Caseinolytic peptidase B protein homolog	CLPB	tr|A0A2U3TZY2|A0A2U3TZY2_HUMAN Caseinolytic mitochondrial matrix peptidase chaperone subunit B OS=Homo sapiens OX=9606 GN=CLPB PE=1 SV=1;sp|Q9H078|CLPB_HUMAN Caseinolytic peptidase B protein homolog OS=Homo sapiens OX=9606 GN=CLPB PE=1 SV=1;tr|A0A2R8Y602|A	9	7	7	7	2	2	1	1	2	1	3	1	1	2	2	1	1	2	1	3	1	1	2	2	1	1	2	1	3	1	1	12.4	12.4	12.4	76.852	692	692;707;382;327;149;152;170;141;168	0	9.3988	3.5	3.3	1.6
Q9UJV9;H0Y8L8;A0A499FJW5	Q9UJV9	4;1;1	4;1;1	4;1;1	Probable ATP-dependent RNA helicase DDX41	DDX41	sp|Q9UJV9|DDX41_HUMAN Probable ATP-dependent RNA helicase DDX41 OS=Homo sapiens OX=9606 GN=DDX41 PE=1 SV=2	3	4	4	4	1	3	3	0	0	0	2	1	2	1	3	3	0	0	0	2	1	2	1	3	3	0	0	0	2	1	2	7.9	7.9	7.9	69.837	622	622;173;312	0	4.1144	2.1	6.1	5.6
E7EX29;P63104;E7ESK7;E5RGE1;E5RIR4;E9PD24;E7EVZ2;B0AZS6;B7Z2E6;H0YB80	E7EX29;P63104;E7ESK7;E5RGE1;E5RIR4;E9PD24;E7EVZ2;B0AZS6	4;4;3;2;2;2;2;2;1;1	4;4;3;2;2;2;2;2;1;1	4;4;3;2;2;2;2;2;1;1	14-3-3 protein zeta/delta	YWHAZ	tr|E7EX29|E7EX29_HUMAN Tyrosine 3-monooxygenase/tryptophan 5-monooxygenase activation protein zeta (Fragment) OS=Homo sapiens OX=9606 GN=YWHAZ PE=1 SV=1;sp|P63104|1433Z_HUMAN 14-3-3 protein zeta/delta OS=Homo sapiens OX=9606 GN=YWHAZ PE=1 SV=1;tr|E7ESK7|E7	10	4	4	4	3	2	1	1	1	1	1	1	1	3	2	1	1	1	1	1	1	1	3	2	1	1	1	1	1	1	1	19.1	19.1	19.1	28.036	246	246;245;137;51;75;92;98;168;125;130	0	5.1418	15.4	9.3	5.7
H7BY36;A0A0D9SFL3;B0QYK0;C9JGE3;Q01844	H7BY36;A0A0D9SFL3;B0QYK0;C9JGE3;Q01844	2;2;2;2;2	2;2;2;2;2	2;2;2;2;2	RNA-binding protein EWS	EWSR1	tr|H7BY36|H7BY36_HUMAN EWS RNA binding protein 1 (Fragment) OS=Homo sapiens OX=9606 GN=EWSR1 PE=1 SV=1;tr|A0A0D9SFL3|A0A0D9SFL3_HUMAN EWS RNA binding protein 1 OS=Homo sapiens OX=9606 GN=EWSR1 PE=1 SV=1;tr|B0QYK0|B0QYK0_HUMAN EWS RNA binding protein 1 OS=H	5	2	2	2	1	2	2	2	2	2	1	1	1	1	2	2	2	2	2	1	1	1	1	2	2	2	2	2	1	1	1	9.7	9.7	9.7	32.071	308	308;584;618;620;656	0	12.618	4.9	9.7	9.7
Q8J015;A0A7I2V5L3;A0A7I2V2L9;M0QYS1;P40429;Q6NVV1	Q8J015;A0A7I2V5L3;A0A7I2V2L9;M0QYS1;P40429;Q6NVV1	2;2;2;2;2;1	2;2;2;2;2;1	2;2;2;2;2;1	60S ribosomal protein L13a;Putative 60S ribosomal protein L13a protein RPL13AP3	RPL13a;RPL13A;RPL13AP3	tr|Q8J015|Q8J015_HUMAN 60S ribosomal protein L13a OS=Homo sapiens OX=9606 GN=RPL13A PE=1 SV=1;tr|A0A7I2V5L3|A0A7I2V5L3_HUMAN 60S ribosomal protein L13a OS=Homo sapiens OX=9606 GN=RPL13A PE=1 SV=1;tr|A0A7I2V2L9|A0A7I2V2L9_HUMAN 60S ribosomal protein L13a OS	6	2	2	2	1	0	2	0	0	1	1	1	1	1	0	2	0	0	1	1	1	1	1	0	2	0	0	1	1	1	1	13.4	13.4	13.4	16.731	142	142;188;198;210;203;102	0.004008	1.8439	7.7	0	13.4
A0A2R8Y623;P62081;B5MCP9	A0A2R8Y623;P62081;B5MCP9	2;2;1	2;2;1	2;2;1	40S ribosomal protein S7	RPS7	tr|A0A2R8Y623|A0A2R8Y623_HUMAN 40S ribosomal protein S7 (Fragment) OS=Homo sapiens OX=9606 GN=RPS7 PE=1 SV=1;sp|P62081|RS7_HUMAN 40S ribosomal protein S7 OS=Homo sapiens OX=9606 GN=RPS7 PE=1 SV=1;tr|B5MCP9|B5MCP9_HUMAN 40S ribosomal protein S7 OS=Homo sapi	3	2	2	2	1	1	2	0	0	0	0	1	0	1	1	2	0	0	0	0	1	0	1	1	2	0	0	0	0	1	0	10.1	10.1	10.1	19.405	169	169;194;187	0	3.7057	4.7	4.7	10.1
P26641	P26641	3	3	3	Elongation factor 1-gamma	EEF1G	sp|P26641|EF1G_HUMAN Elongation factor 1-gamma OS=Homo sapiens OX=9606 GN=EEF1G PE=1 SV=3	1	3	3	3	2	1	2	0	1	1	2	1	1	2	1	2	0	1	1	2	1	1	2	1	2	0	1	1	2	1	1	8.2	8.2	8.2	50.118	437	437	0	3.8586	5.3	2.3	5.3
E7ETK5;A0A7I2YQK5;A0A7I2V2T3;H0Y4R1;A0A994J749;P12268	E7ETK5;A0A7I2YQK5;A0A7I2V2T3;H0Y4R1;A0A994J749;P12268	1;1;1;1;1;1	1;1;1;1;1;1	1;1;1;1;1;1	Inosine-5-monophosphate dehydrogenase 2	IMPDH2	tr|E7ETK5|E7ETK5_HUMAN Inosine-5-monophosphate dehydrogenase OS=Homo sapiens OX=9606 GN=IMPDH2 PE=1 SV=2;tr|A0A7I2YQK5|A0A7I2YQK5_HUMAN Inosine-5-monophosphate dehydrogenase OS=Homo sapiens OX=9606 GN=IMPDH2 PE=1 SV=1;tr|A0A7I2V2T3|A0A7I2V2T3_HUMAN Inosi	6	1	1	1	1	1	1	1	1	1	1	1	1	1	1	1	1	1	1	1	1	1	1	1	1	1	1	1	1	1	1	2.5	2.5	2.5	53.026	489	489;513;522;538;1194;514	0	4.5851	2.5	2.5	2.5
E9PG15;P27348	E9PG15;P27348	1;1	1;1	1;1	14-3-3 protein theta	YWHAQ	tr|E9PG15|E9PG15_HUMAN Tyrosine 3-monooxygenase/tryptophan 5-monooxygenase activation protein theta (Fragment) OS=Homo sapiens OX=9606 GN=YWHAQ PE=1 SV=1;sp|P27348|1433T_HUMAN 14-3-3 protein theta OS=Homo sapiens OX=9606 GN=YWHAQ PE=1 SV=1	2	1	1	1	1	1	1	1	1	1	1	1	1	1	1	1	1	1	1	1	1	1	1	1	1	1	1	1	1	1	1	9.4	9.4	9.4	17.048	149	149;245	0	12.009	9.4	9.4	9.4
F5H1U9;O75970;H0YGQ3;B7ZB24;A0A075B6R8	F5H1U9;O75970	9;9;4;3;2	9;9;4;3;2	9;9;4;3;2	Multiple PDZ domain protein	MPDZ	tr|F5H1U9|F5H1U9_HUMAN Multiple PDZ domain crumbs cell polarity complex component OS=Homo sapiens OX=9606 GN=MPDZ PE=1 SV=1;sp|O75970|MPDZ_HUMAN Multiple PDZ domain protein OS=Homo sapiens OX=9606 GN=MPDZ PE=1 SV=2	5	9	9	9	4	3	3	0	0	0	4	2	2	4	3	3	0	0	0	4	2	2	4	3	3	0	0	0	4	2	2	5.8	5.8	5.8	223.12	2084	2084;2070;1006;929;611	0	8.7547	2.2	1.5	2
E9PLF1;E9PHN7;A0A3B3IRM5;E9PHN6;Q5T8R1;F6XZQ7;P46439;P28161;P21266	E9PLF1;E9PHN7;A0A3B3IRM5;E9PHN6;Q5T8R1;F6XZQ7;P46439;P28161;P21266	1;1;1;1;1;1;1;1;1	1;1;1;1;1;1;1;1;1	1;1;1;1;1;1;1;1;1	Glutathione S-transferase Mu 5;Glutathione S-transferase Mu 2;Glutathione S-transferase Mu 3	GSTM2;GSTM5;GSTM3	tr|E9PLF1|E9PLF1_HUMAN Glutathione S-transferase mu 2 (Fragment) OS=Homo sapiens OX=9606 GN=GSTM2 PE=1 SV=2;tr|E9PHN7|E9PHN7_HUMAN Glutathione S-transferase OS=Homo sapiens OX=9606 GN=GSTM2 PE=1 SV=2;tr|A0A3B3IRM5|A0A3B3IRM5_HUMAN Glutathione S-transferase	9	1	1	1	1	1	1	1	1	1	1	0	1	1	1	1	1	1	1	1	0	1	1	1	1	1	1	1	1	0	1	6.1	6.1	6.1	17.369	147	147;181;189;193;218;220;218;218;225	0.0020877	2.0852	6.1	6.1	6.1
F8VWW8;Q92485	F8VWW8;Q92485	2;2	2;2	2;2	Acid sphingomyelinase-like phosphodiesterase 3b	SMPDL3B	tr|F8VWW8|F8VWW8_HUMAN Sphingomyelin phosphodiesterase acid like 3B OS=Homo sapiens OX=9606 GN=SMPDL3B PE=1 SV=1;sp|Q92485|ASM3B_HUMAN Acid sphingomyelinase-like phosphodiesterase 3b OS=Homo sapiens OX=9606 GN=SMPDL3B PE=1 SV=2	2	2	2	2	1	2	1	0	0	0	1	1	1	1	2	1	0	0	0	1	1	1	1	2	1	0	0	0	1	1	1	6.4	6.4	6.4	45.314	407	407;455	0	7.6193	2.5	6.4	2.5
Q32MZ4;A0A8V8TLX7	Q32MZ4	3;1	2;0	2;0	Leucine-rich repeat flightless-interacting protein 1	LRRFIP1	sp|Q32MZ4|LRRF1_HUMAN Leucine-rich repeat flightless-interacting protein 1 OS=Homo sapiens OX=9606 GN=LRRFIP1 PE=1 SV=2	2	3	2	2	2	2	2	0	0	0	2	3	3	1	1	2	0	0	0	1	2	2	1	1	2	0	0	0	1	2	2	4.8	3.3	3.3	89.252	808	808;472	0	6.2398	3.1	3.2	3.3
P23526	P23526	2	2	2	Adenosylhomocysteinase	AHCY	sp|P23526|SAHH_HUMAN Adenosylhomocysteinase OS=Homo sapiens OX=9606 GN=AHCY PE=1 SV=4	1	2	2	2	1	1	1	2	1	1	2	1	2	1	1	1	2	1	1	2	1	2	1	1	1	2	1	1	2	1	2	5.6	5.6	5.6	47.716	432	432	0	2.507	2.8	2.8	2.8
P60842;J3QKZ9;J3QLN6;J3KS25;J3QR64;J3KTB5;J3QL43;J3KT12;E7EQG2;Q14240;J3KSN7;J3KSZ0;J3QS69	P60842;J3QKZ9;J3QLN6;J3KS25;J3QR64;J3KTB5;J3QL43;J3KT12;E7EQG2;Q14240	3;2;2;2;2;2;2;2;2;2;1;1;1	3;2;2;2;2;2;2;2;2;2;1;1;1	3;2;2;2;2;2;2;2;2;2;1;1;1	Eukaryotic initiation factor 4A-I;Eukaryotic initiation factor 4A-II;Eukaryotic initiation factor 4A-II, N-terminally processed	EIF4A1;EIF4A2	sp|P60842|IF4A1_HUMAN Eukaryotic initiation factor 4A-I OS=Homo sapiens OX=9606 GN=EIF4A1 PE=1 SV=1;tr|J3QKZ9|J3QKZ9_HUMAN ATP-dependent RNA helicase (Fragment) OS=Homo sapiens OX=9606 GN=EIF4A1 PE=1 SV=8;tr|J3QLN6|J3QLN6_HUMAN ATP-dependent RNA helicase (	13	3	3	3	1	1	1	1	1	2	1	1	1	1	1	1	1	1	2	1	1	1	1	1	1	1	1	2	1	1	1	8.1	8.1	8.1	46.153	406	406;134;163;187;214;257;271;341;362;407;109;230;300	0	3.1911	2	2	2.5
P78527;A0A8V8TMR1	P78527	7;2	7;2	7;2	DNA-dependent protein kinase catalytic subunit	PRKDC	sp|P78527|PRKDC_HUMAN DNA-dependent protein kinase catalytic subunit OS=Homo sapiens OX=9606 GN=PRKDC PE=1 SV=3	2	7	7	7	3	2	2	1	0	0	1	1	0	3	2	2	1	0	0	1	1	0	3	2	2	1	0	0	1	1	0	1.9	1.9	1.9	469.08	4128	4128;1687	0	6.2106	0.8	0.5	0.5
P13010	P13010	4	4	4	X-ray repair cross-complementing protein 5	XRCC5	sp|P13010|XRCC5_HUMAN X-ray repair cross-complementing protein 5 OS=Homo sapiens OX=9606 GN=XRCC5 PE=1 SV=3	1	4	4	4	2	1	4	0	0	0	0	0	0	2	1	4	0	0	0	0	0	0	2	1	4	0	0	0	0	0	0	6.1	6.1	6.1	82.704	732	732	0	3.9335	3	1.4	6.1
Q96IZ0;H0YHP5	Q96IZ0	3;1	3;1	3;1	PRKC apoptosis WT1 regulator protein	PAWR	sp|Q96IZ0|PAWR_HUMAN PRKC apoptosis WT1 regulator protein OS=Homo sapiens OX=9606 GN=PAWR PE=1 SV=1	2	3	3	3	1	2	2	0	0	0	1	1	1	1	2	2	0	0	0	1	1	1	1	2	2	0	0	0	1	1	1	9.1	9.1	9.1	36.567	340	340;72	0	5.8917	3.8	5.9	7.1
E9PLA9;G3V153;Q14444	E9PLA9;G3V153;Q14444	1;1;1	1;1;1	1;1;1	Caprin-1	CAPRIN1	tr|E9PLA9|E9PLA9_HUMAN Cell cycle associated protein 1 (Fragment) OS=Homo sapiens OX=9606 GN=CAPRIN1 PE=1 SV=1;tr|G3V153|G3V153_HUMAN Cell cycle associated protein 1 OS=Homo sapiens OX=9606 GN=CAPRIN1 PE=1 SV=1;sp|Q14444|CAPR1_HUMAN Caprin-1 OS=Homo sapien	3	1	1	1	1	1	1	1	1	1	1	1	1	1	1	1	1	1	1	1	1	1	1	1	1	1	1	1	1	1	1	5.9	5.9	5.9	20.236	186	186;628;709	0	2.8915	5.9	5.9	5.9
O60292	O60292	4	3	3	Signal-induced proliferation-associated 1-like protein 3	SIPA1L3	sp|O60292|SI1L3_HUMAN Signal-induced proliferation-associated 1-like protein 3 OS=Homo sapiens OX=9606 GN=SIPA1L3 PE=1 SV=3	1	4	3	3	2	1	3	0	0	0	1	4	3	1	1	2	0	0	0	1	3	2	1	1	2	0	0	0	1	3	2	2.9	2.4	2.4	194.61	1781	1781	0	4.383	1.4	0.8	2.1
O00443;A0A0C4DGF9	O00443;A0A0C4DGF9	2;1	2;1	2;1	Phosphatidylinositol 4-phosphate 3-kinase C2 domain-containing subunit alpha	PIK3C2A	sp|O00443|P3C2A_HUMAN Phosphatidylinositol 4-phosphate 3-kinase C2 domain-containing subunit alpha OS=Homo sapiens OX=9606 GN=PIK3C2A PE=1 SV=2;tr|A0A0C4DGF9|A0A0C4DGF9_HUMAN Phosphatidylinositol-4-phosphate 3-kinase catalytic subunit type 2 alpha OS=Homo	2	2	2	2	1	1	1	0	0	0	2	1	1	1	1	1	0	0	0	2	1	1	1	1	1	0	0	0	2	1	1	1.5	1.5	1.5	190.68	1686	1686;483	0	2.5914	0.7	0.7	0.7
Q9BQI0;Q5JUP3;H7C605;A6PVM9	Q9BQI0;Q5JUP3	3;2;1;1	3;2;1;1	3;2;1;1	Allograft inflammatory factor 1-like	AIF1L	sp|Q9BQI0|AIF1L_HUMAN Allograft inflammatory factor 1-like OS=Homo sapiens OX=9606 GN=AIF1L PE=1 SV=1;tr|Q5JUP3|Q5JUP3_HUMAN Allograft inflammatory factor 1 like OS=Homo sapiens OX=9606 GN=AIF1L PE=1 SV=1	4	3	3	3	2	2	2	0	0	0	0	1	0	2	2	2	0	0	0	0	1	0	2	2	2	0	0	0	0	1	0	21.3	21.3	21.3	17.068	150	150;97;42;94	0	4.227	14.7	11.3	14.7
O94973;A0A0G2JS82;A0A8I5KPP9;A0A0G2JQM1;A0A0G2JQT9;A0A0G2JQA4;A0A0G2JRF9;E9PPY8;A0A0G2JS17;E9PQP4;A0A0G2JRS3;A0A0G2JQV2;A0A8I5KV06;A0A8I5KYZ9;A0A0G2JQF7;M0R2D9;A0A8I5KY83;A0A0G2JQP3;E9PNC4;A0A0G2JRP9	O94973;A0A0G2JS82;A0A8I5KPP9;A0A0G2JQM1	10;9;9;8;4;4;4;4;4;3;2;2;2;2;2;2;1;1;1;1	3;3;2;2;1;1;1;1;1;1;1;0;0;1;1;0;1;0;0;0	3;3;2;2;1;1;1;1;1;1;1;0;0;1;1;0;1;0;0;0	AP-2 complex subunit alpha-2	AP2A2	sp|O94973|AP2A2_HUMAN AP-2 complex subunit alpha-2 OS=Homo sapiens OX=9606 GN=AP2A2 PE=1 SV=2;tr|A0A0G2JS82|A0A0G2JS82_HUMAN AP-2 complex subunit alpha-2 (Fragment) OS=Homo sapiens OX=9606 GN=AP2A2 PE=1 SV=1;tr|A0A8I5KPP9|A0A8I5KPP9_HUMAN AP-1 complex subu	20	10	3	3	6	4	8	0	0	0	2	3	1	1	1	2	0	0	0	0	2	1	1	1	2	0	0	0	0	2	1	10.5	3.6	3.6	103.96	939	939;917;655;634;173;356;356;265;156;195;140;138;134;124;90;57;149;60;125;62	0	4.2931	6.2	3.9	8.6
P59666;P59665	P59666;P59665	2;2	2;2	2;2	Neutrophil defensin 3;HP 3-56;Neutrophil defensin 2;Neutrophil defensin 1;HP 1-56;Neutrophil defensin 2	DEFA3;DEFA1	sp|P59666|DEF3_HUMAN Neutrophil defensin 3 OS=Homo sapiens OX=9606 GN=DEFA3 PE=1 SV=1;sp|P59665|DEF1_HUMAN Neutrophil defensin 1 OS=Homo sapiens OX=9606 GN=DEFA1 PE=1 SV=1	2	2	2	2	1	1	1	1	2	2	1	1	1	1	1	1	1	2	2	1	1	1	1	1	1	1	2	2	1	1	1	20.2	20.2	20.2	10.245	94	94;94	0	2.9955	9.6	9.6	9.6
O43390;A0A6Q8PEX7;B4DT28;A0A6Q8PH31;A0A6Q8PH35;A0A286YEZ8	O43390;A0A6Q8PEX7;B4DT28;A0A6Q8PH31;A0A6Q8PH35	4;3;3;2;2;1	2;1;2;1;2;1	2;1;2;1;2;1	Heterogeneous nuclear ribonucleoprotein R	HNRNPR	sp|O43390|HNRPR_HUMAN Heterogeneous nuclear ribonucleoprotein R OS=Homo sapiens OX=9606 GN=HNRNPR PE=1 SV=1;tr|A0A6Q8PEX7|A0A6Q8PEX7_HUMAN Heterogeneous nuclear ribonucleoprotein R (Fragment) OS=Homo sapiens OX=9606 GN=HNRNPR PE=4 SV=1;tr|B4DT28|B4DT28_HUM	6	4	2	2	2	3	2	1	2	1	1	2	1	1	1	1	1	1	0	1	1	0	1	1	1	1	1	0	1	1	0	7.6	3.9	3.9	70.942	633	633;238;494;279;481;141	0.0021142	2.1896	3.6	5.4	3.5
Q9NQX4;H0YM93;H0YMK3	Q9NQX4	8;2;2	5;1;1	5;1;1	Unconventional myosin-Vc	MYO5C	sp|Q9NQX4|MYO5C_HUMAN Unconventional myosin-Vc OS=Homo sapiens OX=9606 GN=MYO5C PE=1 SV=2	3	8	5	5	5	3	5	0	0	0	2	2	1	3	2	2	0	0	0	1	1	0	3	2	2	0	0	0	1	1	0	5.5	3.6	3.6	202.81	1742	1742;106;269	0	6.7957	3.4	2.1	3.3
F5H1N7;A0A2R8Y6P1;Q6ZU35;A0A1B0GWF1	F5H1N7;A0A2R8Y6P1;Q6ZU35	5;5;5;1	5;5;5;1	5;5;5;1	Uncharacterized protein KIAA1211	KIAA1211	tr|F5H1N7|F5H1N7_HUMAN Capping protein inhibiting regulator of actin dynamics OS=Homo sapiens OX=9606 GN=CRACD PE=1 SV=1;tr|A0A2R8Y6P1|A0A2R8Y6P1_HUMAN Capping protein inhibiting regulator of actin dynamics (Fragment) OS=Homo sapiens OX=9606 GN=CRACD PE=1	4	5	5	5	3	2	3	0	0	0	1	1	2	3	2	3	0	0	0	1	1	2	3	2	3	0	0	0	1	1	2	5.2	5.2	5.2	136.38	1226	1226;1318;1233;387	0	4.8732	2.9	2	2.8
Q5T3N1;P04083	Q5T3N1;P04083	2;2	2;2	2;2	Annexin;Annexin A1	ANXA1	tr|Q5T3N1|Q5T3N1_HUMAN Annexin (Fragment) OS=Homo sapiens OX=9606 GN=ANXA1 PE=1 SV=1;sp|P04083|ANXA1_HUMAN Annexin A1 OS=Homo sapiens OX=9606 GN=ANXA1 PE=1 SV=2	2	2	2	2	1	1	1	2	1	2	2	1	2	1	1	1	2	1	2	2	1	2	1	1	1	2	1	2	2	1	2	10.8	10.8	10.8	22.755	204	204;346	0	4.642	5.4	5.4	5.4
A0A7I2YQX9;F8W6I7;A0A7I2V3R8;P09651;H0YH80;F8VZ49;A0A7I2V2L6;A0A2R8Y4L2;A0A7I2V3W0;Q32P51;A0A7I2YQY2;A0A7I2V5U9;F8VTQ5;F8W646	A0A7I2YQX9;F8W6I7;A0A7I2V3R8;P09651;H0YH80;F8VZ49;A0A7I2V2L6;A0A2R8Y4L2;A0A7I2V3W0;Q32P51	3;3;3;3;2;2;2;2;2;2;1;1;1;1	3;3;3;3;2;2;2;2;2;2;1;1;1;1	3;3;3;3;2;2;2;2;2;2;1;1;1;1	Heterogeneous nuclear ribonucleoprotein A1;Heterogeneous nuclear ribonucleoprotein A1, N-terminally processed;Heterogeneous nuclear ribonucleoprotein A1-like 2	HNRNPA1;HNRNPA1L2	tr|A0A7I2YQX9|A0A7I2YQX9_HUMAN Heterogeneous nuclear ribonucleoprotein A1 OS=Homo sapiens OX=9606 GN=HNRNPA1 PE=1 SV=1;tr|F8W6I7|F8W6I7_HUMAN Heterogeneous nuclear ribonucleoprotein A1 OS=Homo sapiens OX=9606 GN=HNRNPA1 PE=1 SV=2;tr|A0A7I2V3R8|A0A7I2V3R8_H	14	3	3	3	2	1	2	0	0	0	1	1	0	2	1	2	0	0	0	1	1	0	2	1	2	0	0	0	1	1	0	14.9	14.9	14.9	29.069	275	275;307;319;372;191;231;242;275;326;320;45;75;145;156	0	3.3518	8.4	4.7	10.2
P49207	P49207	2	2	2	60S ribosomal protein L34	RPL34	sp|P49207|RL34_HUMAN 60S ribosomal protein L34 OS=Homo sapiens OX=9606 GN=RPL34 PE=1 SV=3	1	2	2	2	1	0	1	0	0	0	0	0	2	1	0	1	0	0	0	0	0	2	1	0	1	0	0	0	0	0	2	14.5	14.5	14.5	13.293	117	117	0	2.564	6.8	0	6.8
Q9Y3U8;J3KTD3;J3QSB5	Q9Y3U8	3;1;1	3;1;1	3;1;1	60S ribosomal protein L36	RPL36	sp|Q9Y3U8|RL36_HUMAN 60S ribosomal protein L36 OS=Homo sapiens OX=9606 GN=RPL36 PE=1 SV=3	3	3	3	3	1	2	2	0	0	0	0	1	1	1	2	2	0	0	0	0	1	1	1	2	2	0	0	0	0	1	1	21	21	21	12.254	105	105;68;94	0	2.5356	12.4	12.4	12.4
A0A494C017;C9JJV6;C9JZL8;A0A499FIY8;C9JC07;Q96S97	A0A494C017;C9JJV6;C9JZL8;A0A499FIY8;C9JC07;Q96S97	2;2;2;2;2;2	2;2;2;2;2;2	2;2;2;2;2;2	Myeloid-associated differentiation marker	MYADM	tr|A0A494C017|A0A494C017_HUMAN Myeloid associated differentiation marker (Fragment) OS=Homo sapiens OX=9606 GN=MYADM PE=1 SV=1;tr|C9JJV6|C9JJV6_HUMAN Myeloid associated differentiation marker (Fragment) OS=Homo sapiens OX=9606 GN=MYADM PE=1 SV=8;tr|C9JZL8|	6	2	2	2	1	2	1	0	0	0	0	1	1	1	2	1	0	0	0	0	1	1	1	2	1	0	0	0	0	1	1	27	27	27	13.153	122	122;146;188;203;259;322	0	9.4194	8.2	27	8.2
Q92804;A0A0J9YYE0;A0A0J9YXY8	Q92804;A0A0J9YYE0;A0A0J9YXY8	2;2;1	1;1;1	1;1;1	TATA-binding protein-associated factor 2N	TAF15	sp|Q92804|RBP56_HUMAN TATA-binding protein-associated factor 2N OS=Homo sapiens OX=9606 GN=TAF15 PE=1 SV=1;tr|A0A0J9YYE0|A0A0J9YYE0_HUMAN TATA-binding protein-associated factor 2N OS=Homo sapiens OX=9606 GN=TAF15 PE=1 SV=1;tr|A0A0J9YXY8|A0A0J9YXY8_HUMAN TA	3	2	1	1	1	1	1	1	1	1	2	1	1	1	1	0	1	1	1	1	0	1	1	1	0	1	1	1	1	0	1	5.4	3	3	61.829	592	592;449;214	0	3.3053	3	3	2.4
P55795	P55795	6	2	2	Heterogeneous nuclear ribonucleoprotein H2	HNRNPH2	sp|P55795|HNRH2_HUMAN Heterogeneous nuclear ribonucleoprotein H2 OS=Homo sapiens OX=9606 GN=HNRNPH2 PE=1 SV=1	1	6	2	2	3	4	3	3	4	3	6	5	6	0	0	0	0	0	0	2	1	2	0	0	0	0	0	0	2	1	2	17.4	4.9	4.9	49.263	449	449	0.0059172	1.7306	8.9	12.5	9.6
F5H2B9;H0YNH8;Q9BZF9;H0YN48	F5H2B9;H0YNH8;Q9BZF9	5;5;5;1	5;5;5;1	5;5;5;1	Uveal autoantigen with coiled-coil domains and ankyrin repeats	UACA	tr|F5H2B9|F5H2B9_HUMAN Uveal autoantigen with coiled-coil domains and ankyrin repeats OS=Homo sapiens OX=9606 GN=UACA PE=1 SV=1;tr|H0YNH8|H0YNH8_HUMAN Uveal autoantigen with coiled-coil domains and ankyrin repeats OS=Homo sapiens OX=9606 GN=UACA PE=1 SV=1;	4	5	5	5	4	2	3	0	0	0	1	0	2	4	2	3	0	0	0	1	0	2	4	2	3	0	0	0	1	0	2	4.2	4.2	4.2	150.53	1307	1307;1401;1416;564	0	6.5344	3.4	1.7	2.4
A0A8I5KVB5;A0A494C1K3;P78347;A0A494C0Q7	A0A8I5KVB5;A0A494C1K3;P78347;A0A494C0Q7	3;3;3;2	3;3;3;2	3;3;3;2	General transcription factor II-I	GTF2I	tr|A0A8I5KVB5|A0A8I5KVB5_HUMAN General transcription factor IIi OS=Homo sapiens OX=9606 GN=GTF2I PE=1 SV=1;tr|A0A494C1K3|A0A494C1K3_HUMAN General transcription factor IIi OS=Homo sapiens OX=9606 GN=GTF2I PE=1 SV=1;sp|P78347|GTF2I_HUMAN General transcriptio	4	3	3	3	2	1	0	0	0	0	2	2	2	2	1	0	0	0	0	2	2	2	2	1	0	0	0	0	2	2	2	3.1	3.1	3.1	126.6	1118	1118;1159;998;192	0	4.1551	2.1	1	0
Q9H2C0;A0A3B3ITY2;A0A0S2Z5G5	Q9H2C0	5;2;2	5;2;2	5;2;2	Gigaxonin	GAN	sp|Q9H2C0|GAN_HUMAN Gigaxonin OS=Homo sapiens OX=9606 GN=GAN PE=1 SV=1	3	5	5	5	1	2	3	0	0	0	1	2	2	1	2	3	0	0	0	1	2	2	1	2	3	0	0	0	1	2	2	9.2	9.2	9.2	67.638	597	597;58;58	0	6.5625	1.8	4.2	5.7
H7BXY3;Q7L2E3	H7BXY3;Q7L2E3	3;3	3;3	3;3	Putative ATP-dependent RNA helicase DHX30	DHX30	tr|H7BXY3|H7BXY3_HUMAN RNA helicase OS=Homo sapiens OX=9606 GN=DHX30 PE=1 SV=1;sp|Q7L2E3|DHX30_HUMAN ATP-dependent RNA helicase DHX30 OS=Homo sapiens OX=9606 GN=DHX30 PE=1 SV=1	2	3	3	3	1	1	2	0	0	0	3	2	1	1	1	2	0	0	0	3	2	1	1	1	2	0	0	0	3	2	1	3	3	3	130.55	1166	1166;1194	0	3.1821	0.9	1	2.1
H0Y948;Q5TIG5;A8MQ02;J3KN01;A0A804HJ20;H0Y8U8;P55196	H0Y948;Q5TIG5;A8MQ02;J3KN01;A0A804HJ20;H0Y8U8;P55196	3;3;3;3;3;3;3	3;3;3;3;3;3;3	3;3;3;3;3;3;3	Afadin	MLLT4	tr|H0Y948|H0Y948_HUMAN Afadin, adherens junction formation factor (Fragment) OS=Homo sapiens OX=9606 GN=AFDN PE=1 SV=2;tr|Q5TIG5|Q5TIG5_HUMAN Afadin, adherens junction formation factor OS=Homo sapiens OX=9606 GN=AFDN PE=1 SV=1;tr|A8MQ02|A8MQ02_HUMAN Afadin	7	3	3	3	1	1	2	0	0	0	1	2	1	1	1	2	0	0	0	1	2	1	1	1	2	0	0	0	1	2	1	4.3	4.3	4.3	101.53	902	902;1665;1781;1816;1831;1890;1824	0	3.7722	1.4	1.4	2.4
F5H018;B5MDF5;J3KQE5;P62826;H0YFC6;B4DV51	F5H018;B5MDF5;J3KQE5;P62826;H0YFC6;B4DV51	2;2;2;2;1;1	2;2;2;2;1;1	2;2;2;2;1;1	GTP-binding nuclear protein Ran	RAN	tr|F5H018|F5H018_HUMAN GTP-binding nuclear protein Ran (Fragment) OS=Homo sapiens OX=9606 GN=RAN PE=1 SV=8;tr|B5MDF5|B5MDF5_HUMAN GTP-binding nuclear protein Ran OS=Homo sapiens OX=9606 GN=RAN PE=1 SV=1;tr|J3KQE5|J3KQE5_HUMAN GTP-binding nuclear protein Ra	6	2	2	2	1	0	1	1	0	0	1	1	2	1	0	1	1	0	0	1	1	2	1	0	1	1	0	0	1	1	2	10.6	10.6	10.6	22.436	198	198;233;234;216;103;128	0.0059055	1.7236	5.6	0	5.1
P03973	P03973	1	1	1	Antileukoproteinase	SLPI	sp|P03973|SLPI_HUMAN Antileukoproteinase OS=Homo sapiens OX=9606 GN=SLPI PE=1 SV=2	1	1	1	1	1	1	0	1	1	1	1	1	1	1	1	0	1	1	1	1	1	1	1	1	0	1	1	1	1	1	1	9.1	9.1	9.1	14.326	132	132	0.0058824	1.6921	9.1	9.1	0
P07205;P00558	P07205;P00558	1;1	1;1	1;1	Phosphoglycerate kinase 2;Phosphoglycerate kinase 1	PGK2;PGK1	sp|P07205|PGK2_HUMAN Phosphoglycerate kinase 2 OS=Homo sapiens OX=9606 GN=PGK2 PE=1 SV=3;sp|P00558|PGK1_HUMAN Phosphoglycerate kinase 1 OS=Homo sapiens OX=9606 GN=PGK1 PE=1 SV=3	2	1	1	1	1	0	1	1	1	1	0	0	0	1	0	1	1	1	1	0	0	0	1	0	1	1	1	1	0	0	0	3.6	3.6	3.6	44.796	417	417;417	0.0022222	2.3552	3.6	0	3.6
A0A4W8X8U3;G3V1R1;A0A0G2JQ42;A0A0G2JRP6	A0A4W8X8U3;G3V1R1;A0A0G2JQ42;A0A0G2JRP6	3;2;2;2	3;2;2;2	1;1;1;1		PRB1	tr|A0A4W8X8U3|A0A4W8X8U3_HUMAN Basic salivary proline-rich protein 1 OS=Homo sapiens OX=9606 GN=PRB1 PE=1 SV=1;tr|G3V1R1|G3V1R1_HUMAN Basic salivary proline-rich protein 1 OS=Homo sapiens OX=9606 GN=PRB1 PE=1 SV=1;tr|A0A0G2JQ42|A0A0G2JQ42_HUMAN Basic saliv	4	3	3	1	0	0	0	0	0	0	1	2	2	0	0	0	0	0	0	1	2	2	0	0	0	0	0	0	1	1	1	33.3	33.3	7.6	19.587	198	198;178;178;198	0	21.691	0	0	0
A0A0U1RQC9;P04637;E7EQX7;J3KP33;E7EMR6;A0A087X1Q1;E9PCY9;S4R334;E9PFT5;A0A087WXZ1;A0A087WT22;E7ESS1	A0A0U1RQC9;P04637;E7EQX7;J3KP33;E7EMR6;A0A087X1Q1	4;4;3;3;2;2;1;1;1;1;1;1	4;4;3;3;2;2;1;1;1;1;1;1	4;4;3;3;2;2;1;1;1;1;1;1	Cellular tumor antigen p53	TP53	tr|A0A0U1RQC9|A0A0U1RQC9_HUMAN Cellular tumor antigen p53 OS=Homo sapiens OX=9606 GN=TP53 PE=1 SV=1;sp|P04637|P53_HUMAN Cellular tumor antigen p53 OS=Homo sapiens OX=9606 GN=TP53 PE=1 SV=4;tr|E7EQX7|E7EQX7_HUMAN Cellular tumor antigen p53 OS=Homo sapiens O	12	4	4	4	0	2	1	0	0	0	2	2	2	0	2	1	0	0	0	2	2	2	0	2	1	0	0	0	2	2	2	9.8	9.8	9.8	45.884	410	410;393;285;343;165;234;127;143;155;182;187;199	0	3.4184	0	4.6	2.9
D6REB1;D6RIA5;D6RFF7;P98082	D6REB1;D6RIA5;D6RFF7;P98082	1;1;1;1	1;1;1;1	1;1;1;1	Disabled homolog 2	DAB2	tr|D6REB1|D6REB1_HUMAN DAB adaptor protein 2 (Fragment) OS=Homo sapiens OX=9606 GN=DAB2 PE=1 SV=1;tr|D6RIA5|D6RIA5_HUMAN DAB adaptor protein 2 (Fragment) OS=Homo sapiens OX=9606 GN=DAB2 PE=1 SV=8;tr|D6RFF7|D6RFF7_HUMAN DAB adaptor protein 2 OS=Homo sapiens	4	1	1	1	1	1	1	0	0	0	1	1	1	1	1	1	0	0	0	1	1	1	1	1	1	0	0	0	1	1	1	16.4	16.4	16.4	7.2901	67	67;75;116;770	0.0020284	1.9457	16.4	16.4	16.4
A0A0B4J2B4;S4R456;K7EM56;K7EJ78;S4R417;K7EQJ5;K7ELC2;P62841	A0A0B4J2B4;S4R456;K7EM56;K7EJ78;S4R417;K7EQJ5;K7ELC2;P62841	2;1;1;1;1;1;1;1	2;1;1;1;1;1;1;1	2;1;1;1;1;1;1;1	40S ribosomal protein S15	RPS15	tr|A0A0B4J2B4|A0A0B4J2B4_HUMAN 40S ribosomal protein S15 OS=Homo sapiens OX=9606 GN=RPS15 PE=1 SV=1;tr|S4R456|S4R456_HUMAN 40S ribosomal protein S15 (Fragment) OS=Homo sapiens OX=9606 GN=RPS15 PE=1 SV=1;tr|K7EM56|K7EM56_HUMAN 40S ribosomal protein S15 OS=H	8	2	2	2	1	2	0	0	0	0	1	2	0	1	2	0	0	0	0	1	2	0	1	2	0	0	0	0	1	2	0	22	22	22	13.742	118	118;68;112;129;135;141;152;145	0	5.9912	10.2	22	0
Q8NC51	Q8NC51	2	2	2	Plasminogen activator inhibitor 1 RNA-binding protein	SERBP1	sp|Q8NC51|PAIRB_HUMAN Plasminogen activator inhibitor 1 RNA-binding protein OS=Homo sapiens OX=9606 GN=SERBP1 PE=1 SV=2	1	2	2	2	0	1	1	0	0	0	2	1	1	0	1	1	0	0	0	2	1	1	0	1	1	0	0	0	2	1	1	6.6	6.6	6.6	44.965	408	408	0	17.375	0	3.9	2.7
Q99569	Q99569	4	4	4	Plakophilin-4	PKP4	sp|Q99569|PKP4_HUMAN Plakophilin-4 OS=Homo sapiens OX=9606 GN=PKP4 PE=1 SV=2	1	4	4	4	2	0	2	0	0	0	3	1	1	2	0	2	0	0	0	3	1	1	2	0	2	0	0	0	3	1	1	3.9	3.9	3.9	131.87	1192	1192	0	4.086	1.8	0	1.8
Q15029;K7EJ74;K7EP67	Q15029;K7EJ74;K7EP67	2;1;1	2;1;1	2;1;1	116 kDa U5 small nuclear ribonucleoprotein component	EFTUD2	sp|Q15029|U5S1_HUMAN 116 kDa U5 small nuclear ribonucleoprotein component OS=Homo sapiens OX=9606 GN=EFTUD2 PE=1 SV=1;tr|K7EJ74|K7EJ74_HUMAN Elongation factor Tu GTP binding domain containing 2 (Fragment) OS=Homo sapiens OX=9606 GN=EFTUD2 PE=1 SV=1;tr|K7EP	3	2	2	2	1	2	1	0	1	1	1	1	1	1	2	1	0	1	1	1	1	1	1	2	1	0	1	1	1	1	1	2.7	2.7	2.7	109.43	972	972;134;223	0.0021834	2.2995	1.3	2.7	1.3
Q9UEY8	Q9UEY8	4	4	4	Gamma-adducin	ADD3	sp|Q9UEY8|ADDG_HUMAN Gamma-adducin OS=Homo sapiens OX=9606 GN=ADD3 PE=1 SV=1	1	4	4	4	3	1	1	0	0	0	0	1	1	3	1	1	0	0	0	0	1	1	3	1	1	0	0	0	0	1	1	5.4	5.4	5.4	79.154	706	706	0	5.1377	3.8	1.4	1.4
P0DOY3;P0DOY2	P0DOY3;P0DOY2	1;1	1;1	1;1			sp|P0DOY3|IGLC3_HUMAN Immunoglobulin lambda constant 3 OS=Homo sapiens OX=9606 GN=IGLC3 PE=1 SV=1;sp|P0DOY2|IGLC2_HUMAN Immunoglobulin lambda constant 2 OS=Homo sapiens OX=9606 GN=IGLC2 PE=1 SV=1	2	1	1	1	0	0	0	1	1	0	1	0	1	0	0	0	1	1	0	1	0	1	0	0	0	1	1	0	1	0	1	9.4	9.4	9.4	11.265	106	106;106	0.0020704	2.0206	0	0	0
Q93077;Q7L7L0;P04908	Q93077;Q7L7L0;P04908	5;5;5	1;1;1	1;1;1	Histone H2A type 1-C;Histone H2A type 3;Histone H2A type 1-B/E	HIST1H2AC;HIST3H2A;HIST1H2AB	sp|Q93077|H2A1C_HUMAN Histone H2A type 1-C OS=Homo sapiens OX=9606 GN=H2AC6 PE=1 SV=3;sp|Q7L7L0|H2A3_HUMAN Histone H2A type 3 OS=Homo sapiens OX=9606 GN=H2AC25 PE=1 SV=3;sp|P04908|H2A1B_HUMAN Histone H2A type 1-B/E OS=Homo sapiens OX=9606 GN=H2AC4 PE=1 SV=	3	5	1	1	5	4	5	2	2	3	2	3	2	1	1	1	0	0	0	0	0	0	1	1	1	0	0	0	0	0	0	35.4	8.5	8.5	14.105	130	130;130;130	0	5.3442	35.4	20.8	35.4
E9PBS1;P22234	E9PBS1;P22234	1;1	1;1	1;1	Multifunctional protein ADE2;Phosphoribosylaminoimidazole-succinocarboxamide synthase;Phosphoribosylaminoimidazole carboxylase	PAICS	tr|E9PBS1|E9PBS1_HUMAN Bifunctional phosphoribosylaminoimidazole carboxylase/phosphoribosylaminoimidazole succinocarboxamide synthetase (Fragment) OS=Homo sapiens OX=9606 GN=PAICS PE=1 SV=1;sp|P22234|PUR6_HUMAN Bifunctional phosphoribosylaminoimidazole car	2	1	1	1	1	1	1	1	1	1	1	1	1	1	1	1	1	1	1	1	1	1	1	1	1	1	1	1	1	1	1	2.7	2.7	2.7	45.651	413	413;425	0	4.3897	2.7	2.7	2.7
O75037	O75037	1	1	1	Kinesin-like protein KIF21B	KIF21B	sp|O75037|KI21B_HUMAN Kinesin-like protein KIF21B OS=Homo sapiens OX=9606 GN=KIF21B PE=1 SV=2	1	1	1	1	1	1	1	0	0	0	1	1	1	1	1	1	0	0	0	1	1	1	1	1	1	0	0	0	1	1	1	0.6	0.6	0.6	182.66	1637	1637	0.0020534	1.9776	0.6	0.6	0.6
I3L1P8;Q02978	I3L1P8;Q02978	2;2	2;2	2;2	Mitochondrial 2-oxoglutarate/malate carrier protein	SLC25A11	tr|I3L1P8|I3L1P8_HUMAN Solute carrier family 25 member 11 (Fragment) OS=Homo sapiens OX=9606 GN=SLC25A11 PE=1 SV=1;sp|Q02978|M2OM_HUMAN Mitochondrial 2-oxoglutarate/malate carrier protein OS=Homo sapiens OX=9606 GN=SLC25A11 PE=1 SV=3	2	2	2	2	1	1	1	1	1	1	1	2	1	1	1	1	1	1	1	1	2	1	1	1	1	1	1	1	1	2	1	8.4	8.4	8.4	32.182	296	296;314	0	3.3822	5.4	5.4	5.4
A0A494C0J7;Q08188	A0A494C0J7;Q08188	3;3	3;3	3;3	Protein-glutamine gamma-glutamyltransferase E;Protein-glutamine gamma-glutamyltransferase E 50 kDa catalytic chain;Protein-glutamine gamma-glutamyltransferase E 27 kDa non-catalytic chain	TGM3	tr|A0A494C0J7|A0A494C0J7_HUMAN Transglutaminase-like domain-containing protein OS=Homo sapiens OX=9606 PE=3 SV=1;sp|Q08188|TGM3_HUMAN Protein-glutamine gamma-glutamyltransferase E OS=Homo sapiens OX=9606 GN=TGM3 PE=1 SV=4	2	3	3	3	1	1	0	0	2	1	2	0	0	1	1	0	0	2	1	2	0	0	1	1	0	0	2	1	2	0	0	4.5	4.5	4.5	78.856	712	712;693	0	3.5249	1.8	1.3	0
Q9BRK4;S4R3W7;B1AL11;B1AL12;B1AL13	Q9BRK4	4;1;1;1;1	4;1;1;1;1	4;1;1;1;1	Leucine zipper putative tumor suppressor 2	LZTS2	sp|Q9BRK4|LZTS2_HUMAN Leucine zipper putative tumor suppressor 2 OS=Homo sapiens OX=9606 GN=LZTS2 PE=1 SV=2	5	4	4	4	1	3	1	0	0	0	0	1	2	1	3	1	0	0	0	0	1	2	1	3	1	0	0	0	0	1	2	5.8	5.8	5.8	72.759	669	669;136;198;220;240	0	4.3315	1.3	4.5	1.6
K7EM20;P62258	K7EM20;P62258	1;1	1;1	1;1	14-3-3 protein epsilon	YWHAE	tr|K7EM20|K7EM20_HUMAN 14-3-3 protein epsilon (Fragment) OS=Homo sapiens OX=9606 GN=YWHAE PE=1 SV=1;sp|P62258|1433E_HUMAN 14-3-3 protein epsilon OS=Homo sapiens OX=9606 GN=YWHAE PE=1 SV=1	2	1	1	1	1	1	1	0	1	0	1	1	0	1	1	1	0	1	0	1	1	0	1	1	1	0	1	0	1	1	0	9.6	9.6	9.6	12.869	115	115;255	0.0095602	1.5744	9.6	9.6	9.6
E9PIY1;A0A0C4DGG1;Q9UKS6;E9PJ75;E9PNM9;E9PJ33	E9PIY1;A0A0C4DGG1;Q9UKS6;E9PJ75;E9PNM9	4;4;4;3;3;1	4;4;4;3;3;1	4;4;4;3;3;1	Protein kinase C and casein kinase substrate in neurons protein 3	PACSIN3	tr|E9PIY1|E9PIY1_HUMAN Protein kinase C and casein kinase substrate in neurons 3 OS=Homo sapiens OX=9606 GN=PACSIN3 PE=1 SV=1;tr|A0A0C4DGG1|A0A0C4DGG1_HUMAN Protein kinase C and casein kinase substrate in neurons 3 (Fragment) OS=Homo sapiens OX=9606 GN=PAC	6	4	4	4	1	1	0	0	0	0	3	3	2	1	1	0	0	0	0	3	3	2	1	1	0	0	0	0	3	3	2	13.8	13.8	13.8	37.213	320	320;405;424;142;148;69	0	4.9277	3.8	2.8	0
E7ETK0;A0A2R8Y849;A0A2R8YD14;P62847;A0A2R8Y8A0	E7ETK0;A0A2R8Y849;A0A2R8YD14;P62847	3;3;3;3;1	3;3;3;3;1	3;3;3;3;1	40S ribosomal protein S24	RPS24	tr|E7ETK0|E7ETK0_HUMAN 40S ribosomal protein S24 OS=Homo sapiens OX=9606 GN=RPS24 PE=1 SV=1;tr|A0A2R8Y849|A0A2R8Y849_HUMAN 40S ribosomal protein S24 OS=Homo sapiens OX=9606 GN=RPS24 PE=1 SV=1;tr|A0A2R8YD14|A0A2R8YD14_HUMAN 40S ribosomal protein S24 OS=Homo	5	3	3	3	1	1	1	0	0	0	1	0	1	1	1	1	0	0	0	1	0	1	1	1	1	0	0	0	1	0	1	26.7	26.7	26.7	15.197	131	131;131;165;133;90	0	2.987	9.2	6.1	9.2
Q6P4F7;H3BQ41;H3BR51	Q6P4F7	3;1;1	3;1;1	3;1;1	Rho GTPase-activating protein 11A	ARHGAP11A	sp|Q6P4F7|RHGBA_HUMAN Rho GTPase-activating protein 11A OS=Homo sapiens OX=9606 GN=ARHGAP11A PE=1 SV=2	3	3	3	3	1	0	2	0	0	0	2	1	1	1	0	2	0	0	0	2	1	1	1	0	2	0	0	0	2	1	1	3.9	3.9	3.9	113.86	1023	1023;207;473	0	3.6661	1.3	0	2.7
G8JL96;Q13332	G8JL96;Q13332	1;1	1;1	1;1	Protein-tyrosine-phosphatase;Receptor-type tyrosine-protein phosphatase S	PTPRS	tr|G8JL96|G8JL96_HUMAN protein-tyrosine-phosphatase OS=Homo sapiens OX=9606 GN=PTPRS PE=1 SV=2;sp|Q13332|PTPRS_HUMAN Receptor-type tyrosine-protein phosphatase S OS=Homo sapiens OX=9606 GN=PTPRS PE=1 SV=3	2	1	1	1	1	1	1	0	0	1	1	1	0	1	1	1	0	0	1	1	1	0	1	1	1	0	0	1	1	1	0	0.9	0.9	0.9	168.43	1501	1501;1948	0.0094697	1.5441	0.9	0.9	0.9
P49223	P49223	1	1	1	Kunitz-type protease inhibitor 3	SPINT3	sp|P49223|SPIT3_HUMAN Kunitz-type protease inhibitor 3 OS=Homo sapiens OX=9606 GN=SPINT3 PE=3 SV=3	1	1	1	1	1	1	1	0	0	1	0	1	1	1	1	1	0	0	1	0	1	1	1	1	1	0	0	1	0	1	1	10.1	10.1	10.1	10.252	89	89	0.0022272	2.3704	10.1	10.1	10.1
A0A994J4R3;Q92522	A0A994J4R3;Q92522	3;3	3;3	3;3	Histone H1x	H1FX	tr|A0A994J4R3|A0A994J4R3_HUMAN H1.10 linker histone OS=Homo sapiens OX=9606 GN=H1-10 PE=4 SV=1;sp|Q92522|H1X_HUMAN Histone H1.10 OS=Homo sapiens OX=9606 GN=H1-10 PE=1 SV=1	2	3	3	3	1	2	0	0	0	0	0	1	2	1	2	0	0	0	0	0	1	2	1	2	0	0	0	0	0	1	2	8.7	8.7	8.7	27.855	264	264;213	0	3.8559	3.8	4.2	0
Q5T8R3;Q5T8R5;P53985	Q5T8R3;Q5T8R5;P53985	2;2;2	2;2;2	2;2;2	Monocarboxylate transporter 1	SLC16A1	tr|Q5T8R3|Q5T8R3_HUMAN Monocarboxylate transporter 1 (Fragment) OS=Homo sapiens OX=9606 GN=SLC16A1 PE=1 SV=1;tr|Q5T8R5|Q5T8R5_HUMAN Monocarboxylate transporter 1 (Fragment) OS=Homo sapiens OX=9606 GN=SLC16A1 PE=1 SV=1;sp|P53985|MOT1_HUMAN Monocarboxylate t	3	2	2	2	0	0	1	1	1	0	1	0	1	0	0	1	1	1	0	1	0	1	0	0	1	1	1	0	1	0	1	5.1	5.1	5.1	31.689	296	296;456;500	0.0020408	1.9678	0	0	5.1
J3KT73;J3QL01;P63173;J3KSP2	J3KT73;J3QL01;P63173;J3KSP2	2;2;2;1	2;2;2;1	2;2;2;1	60S ribosomal protein L38	RPL38	tr|J3KT73|J3KT73_HUMAN 60S ribosomal protein L38 OS=Homo sapiens OX=9606 GN=RPL38 PE=1 SV=1;tr|J3QL01|J3QL01_HUMAN 60S ribosomal protein L38 OS=Homo sapiens OX=9606 GN=RPL38 PE=1 SV=1;sp|P63173|RL38_HUMAN 60S ribosomal protein L38 OS=Homo sapiens OX=9606 G	4	2	2	2	0	0	0	2	1	1	1	0	0	0	0	0	2	1	1	1	0	0	0	0	0	2	1	1	1	0	0	37.5	37.5	37.5	7.5649	64	64;67;70;21	0	2.8222	0	0	0
Q5URX0;P07686;H0YA83;H0Y9B6	Q5URX0;P07686;H0YA83	5;5;3;2	5;5;3;2	5;5;3;2	Beta-hexosaminidase subunit beta;Beta-hexosaminidase subunit beta chain B;Beta-hexosaminidase subunit beta chain A	HEXB	tr|Q5URX0|Q5URX0_HUMAN beta-N-acetylhexosaminidase OS=Homo sapiens OX=9606 GN=HEXB PE=1 SV=1;sp|P07686|HEXB_HUMAN Beta-hexosaminidase subunit beta OS=Homo sapiens OX=9606 GN=HEXB PE=1 SV=4;tr|H0YA83|H0YA83_HUMAN beta-N-acetylhexosaminidase (Fragment) OS=Ho	4	5	5	5	1	0	3	1	0	0	0	0	0	1	0	3	1	0	0	0	0	0	1	0	3	1	0	0	0	0	0	17.5	17.5	17.5	38.258	331	331;556;170;202	0	3.9165	3.3	0	10
G3V1D4;Q9NUP9	G3V1D4;Q9NUP9	2;2	2;2	2;2	Protein lin-7 homolog C	LIN7C	tr|G3V1D4|G3V1D4_HUMAN Lin-7 homolog C (C. elegans), isoform CRA_b OS=Homo sapiens OX=9606 GN=LIN7C PE=1 SV=1;sp|Q9NUP9|LIN7C_HUMAN Protein lin-7 homolog C OS=Homo sapiens OX=9606 GN=LIN7C PE=1 SV=1	2	2	2	2	2	1	2	0	0	0	0	0	0	2	1	2	0	0	0	0	0	0	2	1	2	0	0	0	0	0	0	12.7	12.7	12.7	19.186	173	173;197	0.0095238	1.5577	12.7	6.4	12.7
P50990	P50990	1	1	1	T-complex protein 1 subunit theta	CCT8	sp|P50990|TCPQ_HUMAN T-complex protein 1 subunit theta OS=Homo sapiens OX=9606 GN=CCT8 PE=1 SV=4	1	1	1	1	1	1	1	1	1	1	1	1	1	1	1	1	1	1	1	1	1	1	1	1	1	1	1	1	1	1	1	1.8	1.8	1.8	59.62	548	548	0.0020367	1.9527	1.8	1.8	1.8
A0A4W8VX11;A0A5H1ZRS1;H0YBA1;Q15154;E5RGQ4;E9PGW9;E7EV93	A0A4W8VX11;A0A5H1ZRS1;H0YBA1;Q15154	3;3;3;3;1;1;1	3;3;3;3;1;1;1	3;3;3;3;1;1;1	Pericentriolar material 1 protein	PCM1	tr|A0A4W8VX11|A0A4W8VX11_HUMAN Pericentriolar material 1 OS=Homo sapiens OX=9606 GN=PCM1 PE=4 SV=1;tr|A0A5H1ZRS1|A0A5H1ZRS1_HUMAN Pericentriolar material 1 OS=Homo sapiens OX=9606 GN=PCM1 PE=1 SV=1;tr|H0YBA1|H0YBA1_HUMAN Pericentriolar material 1 OS=Homo s	7	3	3	3	1	1	1	0	0	0	1	0	2	1	1	1	0	0	0	1	0	2	1	1	1	0	0	0	1	0	2	1.6	1.6	1.6	210.13	1860	1860;2016;2043;2024;408;530;749	0	2.5212	0.6	0.6	0.5
M0QXS5;A0A3B3ITJ4;P14866;B4DVF8;M0QYL7;M0R1W6;M0QYT0	M0QXS5;A0A3B3ITJ4;P14866	3;3;3;1;1;1;1	3;3;3;1;1;1;1	3;3;3;1;1;1;1	Heterogeneous nuclear ribonucleoprotein L	HNRNPL	tr|M0QXS5|M0QXS5_HUMAN Heterogeneous nuclear ribonucleoprotein L (Fragment) OS=Homo sapiens OX=9606 GN=HNRNPL PE=1 SV=1;tr|A0A3B3ITJ4|A0A3B3ITJ4_HUMAN Heterogeneous nuclear ribonucleoprotein L (Fragment) OS=Homo sapiens OX=9606 GN=HNRNPL PE=1 SV=1;sp|P1486	7	3	3	3	0	0	1	0	1	1	0	1	1	0	0	1	0	1	1	0	1	1	0	0	1	0	1	1	0	1	1	6.8	6.8	6.8	58.362	530	530;537;589;179;198;220;321	0	3.9336	0	0	2.1
B9A041;A0A5K1VW95;P40925;B8ZZ51;C9JF79;C9JRL4	B9A041;A0A5K1VW95;P40925;B8ZZ51;C9JF79	3;3;3;2;2;1	3;3;3;2;2;1	3;3;3;2;2;1	Malate dehydrogenase, cytoplasmic;Malate dehydrogenase	MDH1	tr|B9A041|B9A041_HUMAN Malate dehydrogenase 1 OS=Homo sapiens OX=9606 GN=MDH1 PE=1 SV=1;tr|A0A5K1VW95|A0A5K1VW95_HUMAN Malate dehydrogenase OS=Homo sapiens OX=9606 GN=MDH1 PE=1 SV=1;sp|P40925|MDHC_HUMAN Malate dehydrogenase, cytoplasmic OS=Homo sapiens OX=	6	3	3	3	1	0	0	0	1	1	0	1	0	1	0	0	0	1	1	0	1	0	1	0	0	0	1	1	0	1	0	18.1	18.1	18.1	23.038	210	210;353;334;169;222;119	0	2.4646	5.7	0	0
Q93050;B7Z2A9;K7EN36;A0A994J735;K7ENA1;A0A994J6N3;A0A994J728;A0A994J4L1;A0A994J3Z4;A0A994J473;B7Z641;K7ERA6;A0A994J6N0;A0A994J4L9;A0A994J731;A0A994J4L6;A0A994J3Z0;K7ELZ6;A0A994J3Z9;K7EM24;K7EPG4;K7EQW2	Q93050;B7Z2A9;K7EN36;A0A994J735;K7ENA1;A0A994J6N3;A0A994J728;A0A994J4L1;A0A994J3Z4;A0A994J473;B7Z641;K7ERA6;A0A994J6N0;A0A994J4L9;A0A994J731;A0A994J4L6;A0A994J3Z0;K7ELZ6;A0A994J3Z9;K7EM24	3;3;3;3;3;3;3;3;3;3;3;3;3;3;3;3;3;2;2;2;1;1	3;3;3;3;3;3;3;3;3;3;3;3;3;3;3;3;3;2;2;2;1;1	3;3;3;3;3;3;3;3;3;3;3;3;3;3;3;3;3;2;2;2;1;1	V-type proton ATPase 116 kDa subunit a isoform 1;V-type proton ATPase subunit a	ATP6V0A1	sp|Q93050|VPP1_HUMAN V-type proton ATPase 116 kDa subunit a 1 OS=Homo sapiens OX=9606 GN=ATP6V0A1 PE=1 SV=3;tr|B7Z2A9|B7Z2A9_HUMAN V-type proton ATPase subunit a OS=Homo sapiens OX=9606 GN=ATP6V0A1 PE=1 SV=1;tr|K7EN36|K7EN36_HUMAN V-type proton ATPase subu	22	3	3	3	2	1	2	0	0	0	0	0	0	2	1	2	0	0	0	0	0	0	2	1	2	0	0	0	0	0	0	4.7	4.7	4.7	96.412	837	837;794;878;865;862;852;816;809;801;795;788;783;762;751;720;239;879;93;767;130;198;68	0.002193	2.3193	2.5	1.2	3.3
J3QRI7;J3QQQ9;J3QQV1;J3QRC4;P61254;J3KSS0;E5RIT6;Q9UNX3	J3QRI7;J3QQQ9;J3QQV1;J3QRC4;P61254;J3KSS0;E5RIT6;Q9UNX3	2;2;2;2;2;1;1;1	2;2;2;2;2;1;1;1	2;2;2;2;2;1;1;1	60S ribosomal protein L26;60S ribosomal protein L26-like 1	RPL26;RPL26L1	tr|J3QRI7|J3QRI7_HUMAN Ribosomal protein L26 (Fragment) OS=Homo sapiens OX=9606 GN=RPL26 PE=3 SV=1;tr|J3QQQ9|J3QQQ9_HUMAN KOW domain-containing protein OS=Homo sapiens OX=9606 PE=3 SV=1;tr|J3QQV1|J3QQV1_HUMAN Ribosomal protein L26 OS=Homo sapiens OX=9606 G	8	2	2	2	1	0	1	1	0	0	0	1	0	1	0	1	1	0	0	0	1	0	1	0	1	1	0	0	0	1	0	15.9	15.9	15.9	12.63	107	107;107;110;135;145;63;128;145	0.0020833	2.0603	7.5	0	8.4
Q92828	Q92828	1	1	1	Coronin-2A	CORO2A	sp|Q92828|COR2A_HUMAN Coronin-2A OS=Homo sapiens OX=9606 GN=CORO2A PE=1 SV=2	1	1	1	1	1	1	1	0	0	0	1	0	1	1	1	1	0	0	0	1	0	1	1	1	1	0	0	0	1	0	1	2.1	2.1	2.1	59.763	525	525	0	3.5855	2.1	2.1	2.1
A0A087WX29;Q13148;A0A087WW61;A0A087WX67;A0A087WXV3;A0A087WXQ5;K7EJM5;A0A087WV68;A0A0A0N0M3;K7EN94;B1AKP7;G3V162;A0A087X260;A0A087WYY0	A0A087WX29;Q13148;A0A087WW61;A0A087WX67;A0A087WXV3;A0A087WXQ5;K7EJM5;A0A087WV68;A0A0A0N0M3;K7EN94;B1AKP7;G3V162;A0A087X260;A0A087WYY0	2;2;1;1;1;1;1;1;1;1;1;1;1;1	2;2;1;1;1;1;1;1;1;1;1;1;1;1	2;2;1;1;1;1;1;1;1;1;1;1;1;1	TAR DNA-binding protein 43	TARDBP;TDP43	tr|A0A087WX29|A0A087WX29_HUMAN TAR DNA-binding protein 43 (Fragment) OS=Homo sapiens OX=9606 GN=TARDBP PE=1 SV=1;sp|Q13148|TADBP_HUMAN TAR DNA-binding protein 43 OS=Homo sapiens OX=9606 GN=TARDBP PE=1 SV=1;tr|A0A087WW61|A0A087WW61_HUMAN TAR DNA binding pro	14	2	2	2	0	0	0	1	0	1	2	0	2	0	0	0	1	0	1	2	0	2	0	0	0	1	0	1	2	0	2	11.1	11.1	11.1	26.743	243	243;414;138;149;175;200;201;212;269;275;295;298;301;304	0	2.799	0	0	0
P48681	P48681	3	3	3	Nestin	NES	sp|P48681|NEST_HUMAN Nestin OS=Homo sapiens OX=9606 GN=NES PE=1 SV=2	1	3	3	3	0	1	0	0	0	0	2	1	2	0	1	0	0	0	0	2	1	2	0	1	0	0	0	0	2	1	2	2.2	2.2	2.2	177.44	1621	1621	0	4.6276	0	0.9	0
P09497;D6RJD1	P09497;D6RJD1	2;1	2;1	2;1	Clathrin light chain B	CLTB	sp|P09497|CLCB_HUMAN Clathrin light chain B OS=Homo sapiens OX=9606 GN=CLTB PE=1 SV=1;tr|D6RJD1|D6RJD1_HUMAN Clathrin light chain (Fragment) OS=Homo sapiens OX=9606 GN=CLTB PE=1 SV=1	2	2	2	2	2	1	1	0	0	0	1	0	1	2	1	1	0	0	0	1	0	1	2	1	1	0	0	0	1	0	1	8.3	8.3	8.3	25.19	229	229;125	0	2.4887	8.3	4.4	4.4
Q9UN86;A0A7I2YQD9;A0A7I2V3E2;D6R9A4;A0A7I2V5M7;A0A7I2YQN9;A0A7I2V3P9;A0A7P0P2U7;A0A7I2V647;A0A7I2YQU8;A0A7I2V651;A0A7I2YQS2;D6RB17;A0A7I2V2S5;E5RJU8;E5RI46;E5RH42;D6RBW8;E5RIF8;D6RBR0;A0A7I2V3Z6;A0A7I2V382;A0A7I2V3C4;A0A7I2V2R0;A0A7I2V547;A0A7I2V4Y8;D6RGJ4;E5RH00;Q13283;D6RAC7	Q9UN86;A0A7I2YQD9;A0A7I2V3E2;D6R9A4;A0A7I2V5M7;A0A7I2YQN9;A0A7I2V3P9;A0A7P0P2U7;A0A7I2V647;A0A7I2YQU8;A0A7I2V651;A0A7I2YQS2;D6RB17;A0A7I2V2S5;E5RJU8;E5RI46;E5RH42;D6RBW8;E5RIF8;D6RBR0;A0A7I2V3Z6;A0A7I2V382;A0A7I2V3C4;A0A7I2V2R0;A0A7I2V547;A0A7I2V4Y8;D6RGJ4;E5RH00;Q13283;D6RAC7	2;2;2;1;1;1;1;1;1;1;1;1;1;1;1;1;1;1;1;1;1;1;1;1;1;1;1;1;1;1	2;2;2;1;1;1;1;1;1;1;1;1;1;1;1;1;1;1;1;1;1;1;1;1;1;1;1;1;1;1	2;2;2;1;1;1;1;1;1;1;1;1;1;1;1;1;1;1;1;1;1;1;1;1;1;1;1;1;1;1	Ras GTPase-activating protein-binding protein 2;Ras GTPase-activating protein-binding protein 1	G3BP2;G3BP1	sp|Q9UN86|G3BP2_HUMAN Ras GTPase-activating protein-binding protein 2 OS=Homo sapiens OX=9606 GN=G3BP2 PE=1 SV=2;tr|A0A7I2YQD9|A0A7I2YQD9_HUMAN G3BP stress granule assembly factor 2 OS=Homo sapiens OX=9606 GN=G3BP2 PE=1 SV=1;tr|A0A7I2V3E2|A0A7I2V3E2_HUMAN	30	2	2	2	1	1	0	0	0	0	2	1	2	1	1	0	0	0	0	2	1	2	1	1	0	0	0	0	2	1	2	5.2	5.2	5.2	54.12	482	482;424;381;31;476;426;388;367;355;334;304;252;198;170;153;31;117;115;106;102;85;74;66;64;63;56;40;37;466;141	0	3.4581	2.5	2.5	0
A0A8V8TQK0;A0A8V8TNU2;A0A8V8TNT7;A0A8V8TQ74;A0A8V8TP22;O75083;D6RD66;A0A8V8TQ69;A0A8V8TP31	A0A8V8TQK0;A0A8V8TNU2;A0A8V8TNT7;A0A8V8TQ74;A0A8V8TP22;O75083;D6RD66;A0A8V8TQ69;A0A8V8TP31	2;2;2;2;2;2;1;1;1	2;2;2;2;2;2;1;1;1	2;2;2;2;2;2;1;1;1	WD repeat-containing protein 1	WDR1	tr|A0A8V8TQK0|A0A8V8TQK0_HUMAN WD repeat domain 1 OS=Homo sapiens OX=9606 GN=WDR1 PE=1 SV=1;tr|A0A8V8TNU2|A0A8V8TNU2_HUMAN WD repeat domain 1 OS=Homo sapiens OX=9606 GN=WDR1 PE=1 SV=1;tr|A0A8V8TNT7|A0A8V8TNT7_HUMAN WD repeat domain 1 OS=Homo sapiens OX=960	9	2	2	2	1	1	2	0	0	0	0	0	0	1	1	2	0	0	0	0	0	0	1	1	2	0	0	0	0	0	0	6.3	6.3	6.3	62.339	572	572;579;610;643;659;606;245;333;432	0	3.5022	2.4	2.4	6.3
Q92747	Q92747	6	1	1	Actin-related protein 2/3 complex subunit 1A	ARPC1A	sp|Q92747|ARC1A_HUMAN Actin-related protein 2/3 complex subunit 1A OS=Homo sapiens OX=9606 GN=ARPC1A PE=1 SV=2	1	6	1	1	5	4	5	0	0	0	2	2	2	1	1	1	0	0	0	0	1	1	1	1	1	0	0	0	0	1	1	21.1	2.7	2.7	41.569	370	370	0.0021739	2.2955	16.5	11.9	16.5
F5H3X6;F5GY37;Q99623;A0A7I2V5F0;J3KPX7;F5GWA7;F5H2D2;A0A3G2KQ93;F5H0C5	F5H3X6;F5GY37;Q99623;A0A7I2V5F0;J3KPX7;F5GWA7	3;3;3;2;2;2;1;1;1	3;3;3;2;2;2;1;1;1	3;3;3;2;2;2;1;1;1	Prohibitin-2	PHB2	tr|F5H3X6|F5H3X6_HUMAN Prohibitin (Fragment) OS=Homo sapiens OX=9606 GN=PHB2 PE=1 SV=3;tr|F5GY37|F5GY37_HUMAN Prohibitin OS=Homo sapiens OX=9606 GN=PHB2 PE=1 SV=1;sp|Q99623|PHB2_HUMAN Prohibitin-2 OS=Homo sapiens OX=9606 GN=PHB2 PE=1 SV=2;tr|A0A7I2V5F0|A0A	9	3	3	3	1	0	0	2	2	1	1	1	1	1	0	0	2	2	1	1	1	1	1	0	0	2	2	1	1	1	1	14.2	14.2	14.2	27.437	247	247;267;299;219;255;261;87;91;112	0	5.3017	5.3	0	0
H0Y6A4;H0Y4U4;Q5T6T6;A6XNE0;P09466;H0Y530	H0Y6A4;H0Y4U4;Q5T6T6;A6XNE0;P09466;H0Y530	2;2;2;2;2;1	2;2;2;2;2;1	2;2;2;2;2;1	Glycodelin	PAEP	tr|H0Y6A4|H0Y6A4_HUMAN Progestagen associated endometrial protein (Fragment) OS=Homo sapiens OX=9606 GN=PAEP PE=1 SV=1;tr|H0Y4U4|H0Y4U4_HUMAN Progestagen associated endometrial protein (Fragment) OS=Homo sapiens OX=9606 GN=PAEP PE=1 SV=1;tr|Q5T6T6|Q5T6T6_H	6	2	2	2	1	0	0	1	1	1	1	0	0	1	0	0	1	1	1	1	0	0	1	0	0	1	1	1	1	0	0	18.3	18.3	18.3	14.802	126	126;131;132;143;180;33	0	4.3403	7.1	0	0
E7ESE2;E9PCW0;C9JW96;P35232;C9JZ20;A0A8I5KWR0	E7ESE2;E9PCW0;C9JW96;P35232;C9JZ20	3;3;3;3;2;1	3;3;3;3;2;1	3;3;3;3;2;1	Prohibitin	PHB	tr|E7ESE2|E7ESE2_HUMAN Prohibitin (Fragment) OS=Homo sapiens OX=9606 GN=PHB PE=1 SV=2;tr|E9PCW0|E9PCW0_HUMAN Prohibitin (Fragment) OS=Homo sapiens OX=9606 GN=PHB PE=1 SV=2;tr|C9JW96|C9JW96_HUMAN Prohibitin (Fragment) OS=Homo sapiens OX=9606 GN=PHB PE=1 SV=	6	3	3	3	0	0	2	2	2	1	0	1	1	0	0	2	2	2	1	0	1	1	0	0	2	2	2	1	0	1	1	15.8	15.8	15.8	22.398	202	202;216;246;272;218;108	0	3.3298	0	0	10.9
A8MTF8;P58499	A8MTF8;P58499	2;2	2;2	2;2	Protein FAM3B	FAM3B	tr|A8MTF8|A8MTF8_HUMAN FAM3 metabolism regulating signaling molecule B OS=Homo sapiens OX=9606 GN=FAM3B PE=1 SV=2;sp|P58499|FAM3B_HUMAN Protein FAM3B OS=Homo sapiens OX=9606 GN=FAM3B PE=1 SV=2	2	2	2	2	0	1	1	0	1	0	1	1	0	0	1	1	0	1	0	1	1	0	0	1	1	0	1	0	1	1	0	7.4	7.4	7.4	28.282	258	258;235	0.0039604	1.7691	0	3.5	3.9
A0A7P0Z4I1;A0A7P0TB87;A0A7I2V451;A0A7I2YQJ3;A0A7P0TBP2;A0A7I2V416;A0A7I2V486;Q5M775;A0A7P0T9K0;J3QS22;A0A7P0TAS3;A0A7I2V562;J3KRN9;J3QQM0;J3KSG2;J3KRB9	A0A7P0Z4I1;A0A7P0TB87;A0A7I2V451;A0A7I2YQJ3;A0A7P0TBP2;A0A7I2V416;A0A7I2V486;Q5M775;A0A7P0T9K0;J3QS22;A0A7P0TAS3;A0A7I2V562	5;5;5;5;5;5;5;5;4;4;4;4;1;1;1;1	5;5;5;5;5;5;5;5;4;4;4;4;1;1;1;1	5;5;5;5;5;5;5;5;4;4;4;4;1;1;1;1	Cytospin-B	SPECC1	tr|A0A7P0Z4I1|A0A7P0Z4I1_HUMAN Sperm antigen with calponin homology and coiled-coil domains 1 OS=Homo sapiens OX=9606 GN=SPECC1 PE=1 SV=1;tr|A0A7P0TB87|A0A7P0TB87_HUMAN Sperm antigen with calponin homology and coiled-coil domains 1 OS=Homo sapiens OX=9606	16	5	5	5	0	0	4	0	0	0	1	1	0	0	0	4	0	0	0	1	1	0	0	0	4	0	0	0	1	1	0	6.1	6.1	6.1	96.455	872	872;873;1009;1029;1034;1048;1050;1068;712;783;784;834;167;202;408;574	0	3.6805	0	0	4.9
A0A0D9SF54;A0A994J4G5;A0A994J7B0;A0A994J6W6;A0A1B0GUH3;A0A1B0GTB7;A0A0D9SFH4	A0A0D9SF54;A0A994J4G5	143;138;47;30;3;2;2	1;1;0;0;0;0;0	1;1;0;0;0;0;0		SPTAN1	tr|A0A0D9SF54|A0A0D9SF54_HUMAN Spectrin alpha, non-erythrocytic 1 OS=Homo sapiens OX=9606 GN=SPTAN1 PE=1 SV=1;tr|A0A994J4G5|A0A994J4G5_HUMAN Spectrin alpha, non-erythrocytic 1 (Fragment) OS=Homo sapiens OX=9606 GN=SPTAN1 PE=4 SV=1	7	143	1	1	113	92	111	35	45	32	67	71	72	0	0	1	0	0	0	0	0	0	0	0	1	0	0	0	0	0	0	52.1	0.7	0.7	282.83	2457	2457;2319;619;482;51;22;68	1	-2	44.3	37.2	44.5
P42704;A0A804HHY9;A0A804HIN4;A0A804HLG8;A0A804HK30;A0A804HL40;A0A804HKJ0;A0A804HKR3;A0A804HIG4;A0A804HI14;A0A804HI40;A0A804HIQ7;A0A804HJI0;A0A804HKI2;A0A804HKK7;A0A804HJZ1;A0A804HJH8;B8ZZ38;C9JCA9;A0A804HK02;A0A804HJA1;A0A804HKX6	P42704;A0A804HHY9;A0A804HIN4;A0A804HLG8;A0A804HK30;A0A804HL40;A0A804HKJ0;A0A804HKR3;A0A804HIG4;A0A804HI14;A0A804HI40;A0A804HIQ7;A0A804HJI0;A0A804HKI2;A0A804HKK7;A0A804HJZ1;A0A804HJH8;B8ZZ38;C9JCA9;A0A804HK02;A0A804HJA1;A0A804HKX6	2;2;2;2;2;2;2;2;2;2;2;2;2;2;1;1;1;1;1;1;1;1	2;2;2;2;2;2;2;2;2;2;2;2;2;2;1;1;1;1;1;1;1;1	2;2;2;2;2;2;2;2;2;2;2;2;2;2;1;1;1;1;1;1;1;1	Leucine-rich PPR motif-containing protein, mitochondrial	LRPPRC	sp|P42704|LPPRC_HUMAN Leucine-rich PPR motif-containing protein, mitochondrial OS=Homo sapiens OX=9606 GN=LRPPRC PE=1 SV=3;tr|A0A804HHY9|A0A804HHY9_HUMAN Leucine rich pentatricopeptide repeat containing OS=Homo sapiens OX=9606 GN=LRPPRC PE=1 SV=1;tr|A0A804	22	2	2	2	1	0	2	0	1	1	2	2	1	1	0	2	0	1	1	2	2	1	1	0	2	0	1	1	2	2	1	1.4	1.4	1.4	157.9	1394	1394;1285;1404;1400;1395;1393;1391;1379;1369;1366;1356;1277;776;1430;266;1363;913;841;837;795;281;141	0.0021598	2.2734	0.8	0	1.4
A0A3B3ITU8;A0A3B3IU04;A0A3F2YNW8;Q14643;A0A3B3ITQ1;B7ZMI3;A0A8C8KBY2;A0A3B3IU05;A0A3B3IRP0;A0A3B3IU13;A0A3B3IRT5	A0A3B3ITU8;A0A3B3IU04;A0A3F2YNW8;Q14643;A0A3B3ITQ1;B7ZMI3;A0A8C8KBY2;A0A3B3IU05	7;7;7;7;5;4;4;4;3;3;2	3;3;3;3;2;2;2;2;1;1;1	3;3;3;3;2;2;2;2;1;1;1	Inositol 1,4,5-trisphosphate receptor type 1	ITPR1	tr|A0A3B3ITU8|A0A3B3ITU8_HUMAN Inositol 1,4,5-trisphosphate receptor OS=Homo sapiens OX=9606 GN=ITPR1 PE=1 SV=1;tr|A0A3B3IU04|A0A3B3IU04_HUMAN Inositol 1,4,5-trisphosphate receptor OS=Homo sapiens OX=9606 GN=ITPR1 PE=1 SV=1;tr|A0A3F2YNW8|A0A3F2YNW8_HUMAN I	11	7	3	3	3	3	4	0	0	0	1	2	1	2	2	0	0	0	0	1	1	1	2	2	0	0	0	0	1	1	1	2.9	1.7	1.7	312.29	2744	2744;2749;2750;2758;2012;721;1668;1818;1548;1739;296	0	2.6335	1.4	1.5	1.2
O75643;A0A494C1A5	O75643;A0A494C1A5	3;2	3;2	3;2	U5 small nuclear ribonucleoprotein 200 kDa helicase	SNRNP200	sp|O75643|U520_HUMAN U5 small nuclear ribonucleoprotein 200 kDa helicase OS=Homo sapiens OX=9606 GN=SNRNP200 PE=1 SV=2;tr|A0A494C1A5|A0A494C1A5_HUMAN U5 small nuclear ribonucleoprotein 200 kDa helicase (Fragment) OS=Homo sapiens OX=9606 GN=SNRNP200 PE=1 SV	2	3	3	3	2	1	2	0	0	0	0	2	1	2	1	2	0	0	0	0	2	1	2	1	2	0	0	0	0	2	1	1.7	1.7	1.7	244.5	2136	2136;1375	0	2.8934	1.2	0.6	1.2
P38919;I3L3H2	P38919;I3L3H2	4;2	4;2	4;2	Eukaryotic initiation factor 4A-III;Eukaryotic initiation factor 4A-III, N-terminally processed	EIF4A3	sp|P38919|IF4A3_HUMAN Eukaryotic initiation factor 4A-III OS=Homo sapiens OX=9606 GN=EIF4A3 PE=1 SV=4;tr|I3L3H2|I3L3H2_HUMAN RNA helicase OS=Homo sapiens OX=9606 GN=EIF4A3 PE=1 SV=2	2	4	4	4	0	0	1	0	0	0	2	2	1	0	0	1	0	0	0	2	2	1	0	0	1	0	0	0	2	2	1	10.9	10.9	10.9	46.871	411	411;390	0	3.2419	0	0	1.9
E5RI97;Q9UJW0	E5RI97;Q9UJW0	3;3	3;3	3;3	Dynactin subunit 4	DCTN4	tr|E5RI97|E5RI97_HUMAN Dynactin subunit 4 OS=Homo sapiens OX=9606 GN=DCTN4 PE=1 SV=1;sp|Q9UJW0|DCTN4_HUMAN Dynactin subunit 4 OS=Homo sapiens OX=9606 GN=DCTN4 PE=1 SV=1	2	3	3	3	2	1	1	0	0	0	0	1	0	2	1	1	0	0	0	0	1	0	2	1	1	0	0	0	0	1	0	31.4	31.4	31.4	10.005	86	86;460	0	2.6522	22.1	11.6	11.6
P60468;S4R3B5	P60468;S4R3B5	2;1	2;1	2;1	Protein transport protein Sec61 subunit beta	SEC61B	sp|P60468|SC61B_HUMAN Protein transport protein Sec61 subunit beta OS=Homo sapiens OX=9606 GN=SEC61B PE=1 SV=2;tr|S4R3B5|S4R3B5_HUMAN SEC61 translocon subunit beta OS=Homo sapiens OX=9606 GN=SEC61B PE=1 SV=1	2	2	2	2	0	0	0	1	0	0	2	1	2	0	0	0	1	0	0	2	1	2	0	0	0	1	0	0	2	1	2	26	26	26	9.9743	96	96;42	0	2.9513	0	0	0
P54652	P54652	11	1	1	Heat shock-related 70 kDa protein 2	HSPA2	sp|P54652|HSP72_HUMAN Heat shock-related 70 kDa protein 2 OS=Homo sapiens OX=9606 GN=HSPA2 PE=1 SV=1	1	11	1	1	8	7	8	8	6	5	5	5	9	0	0	0	1	0	1	0	0	1	0	0	0	1	0	1	0	0	1	16	1.9	1.9	70.02	639	639	0.0058939	1.6968	11.1	10.5	11.1
P10599	P10599	2	2	2	Thioredoxin	TXN	sp|P10599|THIO_HUMAN Thioredoxin OS=Homo sapiens OX=9606 GN=TXN PE=1 SV=3	1	2	2	2	0	0	0	2	1	0	0	0	1	0	0	0	2	1	0	0	0	1	0	0	0	2	1	0	0	0	1	10.5	10.5	10.5	11.737	105	105	0	2.5765	0	0	0
Q96I24	Q96I24	2	2	2	Far upstream element-binding protein 3	FUBP3	sp|Q96I24|FUBP3_HUMAN Far upstream element-binding protein 3 OS=Homo sapiens OX=9606 GN=FUBP3 PE=1 SV=2	1	2	2	2	0	0	0	1	1	1	1	1	0	0	0	0	1	1	1	1	1	0	0	0	0	1	1	1	1	1	0	5.4	5.4	5.4	61.64	572	572	0	4.5233	0	0	0
H7BXK7;A0A1B0GU38;P50452	H7BXK7;A0A1B0GU38;P50452	1;1;1	1;1;1	1;1;1	Serpin B8	SERPINB8	tr|H7BXK7|H7BXK7_HUMAN Serpin family B member 8 (Fragment) OS=Homo sapiens OX=9606 GN=SERPINB8 PE=1 SV=1;tr|A0A1B0GU38|A0A1B0GU38_HUMAN Serpin family B member 8 OS=Homo sapiens OX=9606 GN=SERPINB8 PE=1 SV=1;sp|P50452|SPB8_HUMAN Serpin B8 OS=Homo sapiens OX	3	1	1	1	0	1	1	0	0	0	0	0	0	0	1	1	0	0	0	0	0	0	0	1	1	0	0	0	0	0	0	5.3	5.3	5.3	21.846	189	189;259;374	1	-2	0	5.3	5.3
A0A7P0T8Z7;A0A7P0TBI9;A0A7P0Z4A2;A0A7P0Z4A5;A0A7P0T8D4;A0A7P0T8S8;A0A7P0T8Z2;A0A7P0T8C7;Q9Y5X1	A0A7P0T8Z7;A0A7P0TBI9;A0A7P0Z4A2;A0A7P0Z4A5;A0A7P0T8D4;A0A7P0T8S8;A0A7P0T8Z2;A0A7P0T8C7;Q9Y5X1	1;1;1;1;1;1;1;1;1	1;1;1;1;1;1;1;1;1	1;1;1;1;1;1;1;1;1	Sorting nexin-9	SNX9	tr|A0A7P0T8Z7|A0A7P0T8Z7_HUMAN Sorting nexin 9 OS=Homo sapiens OX=9606 GN=SNX9 PE=1 SV=1;tr|A0A7P0TBI9|A0A7P0TBI9_HUMAN Sorting nexin OS=Homo sapiens OX=9606 GN=SNX9 PE=1 SV=1;tr|A0A7P0Z4A2|A0A7P0Z4A2_HUMAN Sorting nexin OS=Homo sapiens OX=9606 GN=SNX9 PE=	9	1	1	1	1	0	0	0	0	0	1	1	0	1	0	0	0	0	0	1	1	0	1	0	0	0	0	0	1	1	0	2.8	2.8	2.8	56.52	499	499;577;585;588;591;625;628;632;595	0.0021552	2.2698	2.8	0	0
A0A0C4DGN4;A0A0U1RQZ6;Q96DA0	A0A0C4DGN4;A0A0U1RQZ6;Q96DA0	1;1;1	1;1;1	1;1;1	Zymogen granule protein 16 homolog B	ZG16B	tr|A0A0C4DGN4|A0A0C4DGN4_HUMAN Zymogen granule protein 16B OS=Homo sapiens OX=9606 GN=ZG16B PE=4 SV=2;tr|A0A0U1RQZ6|A0A0U1RQZ6_HUMAN Zymogen granule protein 16 homolog B OS=Homo sapiens OX=9606 GN=ZG16B PE=1 SV=1;sp|Q96DA0|ZG16B_HUMAN Zymogen granule prote	3	1	1	1	0	0	0	0	0	0	1	1	1	0	0	0	0	0	0	1	1	1	0	0	0	0	0	0	1	1	1	12.2	12.2	12.2	18.878	172	172;178;208	0	5.4078	0	0	0
Q12923	Q12923	4	4	4	Tyrosine-protein phosphatase non-receptor type 13	PTPN13	sp|Q12923|PTN13_HUMAN Tyrosine-protein phosphatase non-receptor type 13 OS=Homo sapiens OX=9606 GN=PTPN13 PE=1 SV=2	1	4	4	4	2	0	2	0	0	0	2	0	0	2	0	2	0	0	0	2	0	0	2	0	2	0	0	0	2	0	0	2.1	2.1	2.1	276.9	2485	2485	0	4.0971	1	0	1
P05023;H0Y7C1;M0R116;A0A2R8YEY8;A0A0A0MT26;P13637	P05023	3;1;1;1;1;1	3;1;1;1;1;1	2;0;0;0;0;0	Sodium/potassium-transporting ATPase subunit alpha-1	ATP1A1	sp|P05023|AT1A1_HUMAN Sodium/potassium-transporting ATPase subunit alpha-1 OS=Homo sapiens OX=9606 GN=ATP1A1 PE=1 SV=1	6	3	3	2	0	0	0	0	1	1	2	2	0	0	0	0	0	1	1	2	2	0	0	0	0	0	1	1	1	1	0	4.3	4.3	2.5	112.89	1023	1023;714;983;1010;1226;1013	0	4.0813	0	0	0
G3V1M9;P04280;A0A0D9SET1;A0A0G2JMN8;A0A0G2JM13;A0A0G2JR74;P02812	G3V1M9;P04280;A0A0D9SET1;A0A0G2JMN8;A0A0G2JM13;A0A0G2JR74;P02812	3;3;2;2;2;2;2	1;1;1;1;1;1;1	1;1;1;1;1;1;1	Basic salivary proline-rich protein 1;Proline-rich peptide II-2;Basic peptide IB-6;Peptide P-H;Basic salivary proline-rich protein 2;Basic proline-rich peptide IB-1;Basic proline-rich peptide P-E;Basic proline-rich peptide IB-7;Basic proline-rich peptide IB-8c;Basic proline-rich peptide IB-4	PRB1;PRB2	tr|G3V1M9|G3V1M9_HUMAN Basic salivary proline-rich protein 1 OS=Homo sapiens OX=9606 GN=PRB1 PE=4 SV=2;sp|P04280|PRP1_HUMAN Basic salivary proline-rich protein 1 OS=Homo sapiens OX=9606 GN=PRB1 PE=1 SV=3;tr|A0A0D9SET1|A0A0D9SET1_HUMAN HCG26567, isoform CRA	7	3	1	1	0	0	0	0	0	0	1	2	2	0	0	0	0	0	0	1	1	1	0	0	0	0	0	0	1	1	1	39.1	23.6	23.6	32.457	330	330;392;151;333;416;580;416	0	3.3738	0	0	0
K7EJT5;K7EP65;K7EKS7;K7ELC4;K7EMH1;K7ERI7;P35268	K7EJT5;K7EP65;K7EKS7;K7ELC4;K7EMH1;K7ERI7;P35268	2;2;2;2;2;2;2	2;2;2;2;2;2;2	2;2;2;2;2;2;2	60S ribosomal protein L22	RPL22	tr|K7EJT5|K7EJT5_HUMAN Ribosomal protein L22 (Fragment) OS=Homo sapiens OX=9606 GN=RPL22 PE=1 SV=1;tr|K7EP65|K7EP65_HUMAN Ribosomal protein L22 (Fragment) OS=Homo sapiens OX=9606 GN=RPL22 PE=1 SV=1;tr|K7EKS7|K7EKS7_HUMAN 60S ribosomal protein L22 OS=Homo s	7	2	2	2	1	0	1	0	0	0	1	2	0	1	0	1	0	0	0	1	2	0	1	0	1	0	0	0	1	2	0	51.1	51.1	51.1	5.0827	47	47;48;53;79;89;95;128	0.0021008	2.1365	23.4	0	27.7
E7EQR6;P17987;F5H282;E7ERF2	E7EQR6;P17987;F5H282;E7ERF2	2;2;1;1	2;2;1;1	2;2;1;1	T-complex protein 1 subunit alpha	TCP1	tr|E7EQR6|E7EQR6_HUMAN T-complex 1 OS=Homo sapiens OX=9606 GN=TCP1 PE=1 SV=1;sp|P17987|TCPA_HUMAN T-complex protein 1 subunit alpha OS=Homo sapiens OX=9606 GN=TCP1 PE=1 SV=1;tr|F5H282|F5H282_HUMAN T-complex 1 OS=Homo sapiens OX=9606 GN=TCP1 PE=1 SV=1;tr|E7	4	2	2	2	0	0	2	0	0	0	1	0	1	0	0	2	0	0	0	1	0	1	0	0	2	0	0	0	1	0	1	5	5	5	43.885	401	401;556;332;433	0.0021053	2.1569	0	0	5
E5RK64;O95292	E5RK64;O95292	2;2	2;2	1;1	Vesicle-associated membrane protein-associated protein B/C	VAPB	tr|E5RK64|E5RK64_HUMAN VAMP associated protein B and C OS=Homo sapiens OX=9606 GN=VAPB PE=1 SV=1;sp|O95292|VAPB_HUMAN Vesicle-associated membrane protein-associated protein B/C OS=Homo sapiens OX=9606 GN=VAPB PE=1 SV=3	2	2	2	1	2	1	1	0	0	0	0	0	0	2	1	1	0	0	0	0	0	0	1	0	0	0	0	0	0	0	0	36.6	36.6	19.7	7.8009	71	71;243	0	5.3873	36.6	16.9	16.9
A0A7P0T9U7;Q15637	A0A7P0T9U7;Q15637	2;2	2;2	2;2	Splicing factor 1	SF1	tr|A0A7P0T9U7|A0A7P0T9U7_HUMAN Splicing factor 1 OS=Homo sapiens OX=9606 GN=SF1 PE=1 SV=1;sp|Q15637|SF01_HUMAN Splicing factor 1 OS=Homo sapiens OX=9606 GN=SF1 PE=1 SV=4	2	2	2	2	0	0	0	0	0	0	2	1	1	0	0	0	0	0	0	2	1	1	0	0	0	0	0	0	2	1	1	3.1	3.1	3.1	80.369	764	764;639	0	3.0269	0	0	0
P63218;A0A804HLA8	P63218	3;1	3;1	3;1	Guanine nucleotide-binding protein G(I)/G(S)/G(O) subunit gamma-5	GNG5	sp|P63218|GBG5_HUMAN Guanine nucleotide-binding protein G(I)/G(S)/G(O) subunit gamma-5 OS=Homo sapiens OX=9606 GN=GNG5 PE=1 SV=3	2	3	3	3	0	0	0	0	0	0	1	2	1	0	0	0	0	0	0	1	2	1	0	0	0	0	0	0	1	2	1	38.2	38.2	38.2	7.3184	68	68;68	0	2.4573	0	0	0
A0A8V8TMM5;B4DNK4;H3BTN5;A0A804F6T5;A0A8V8TNX9;A0A804F729;P14618;H3BU13;H3BT25;H3BUW1;H3BTJ2;H3BQ34;H3BN34;H3BQZ3;P30613	A0A8V8TMM5;B4DNK4;H3BTN5;A0A804F6T5;A0A8V8TNX9;A0A804F729;P14618;H3BU13;H3BT25;H3BUW1;H3BTJ2;H3BQ34	3;3;3;3;3;3;3;2;2;2;2;2;1;1;1	3;3;3;3;3;3;3;2;2;2;2;2;1;1;1	3;3;3;3;3;3;3;2;2;2;2;2;1;1;1	Pyruvate kinase;Pyruvate kinase PKM	PKM	tr|A0A8V8TMM5|A0A8V8TMM5_HUMAN Pyruvate kinase OS=Homo sapiens OX=9606 GN=PKM PE=1 SV=1;tr|B4DNK4|B4DNK4_HUMAN Pyruvate kinase OS=Homo sapiens OX=9606 GN=PKM PE=1 SV=1;tr|H3BTN5|H3BTN5_HUMAN Pyruvate kinase (Fragment) OS=Homo sapiens OX=9606 GN=PKM PE=1 SV	15	3	3	3	0	0	0	0	1	2	0	1	1	0	0	0	0	1	2	0	1	1	0	0	0	0	1	2	0	1	1	10.2	10.2	10.2	37.429	344	344;457;485;566;605;605;531;82;151;162;168;281;51;69;574	0	3.3824	0	0	0
Q5VVL7;A0A7P0Z494;P11182;A0A7P0T9W1	Q5VVL7;A0A7P0Z494;P11182;A0A7P0T9W1	3;3;3;2	3;3;3;2	3;3;3;2	Lipoamide acyltransferase component of branched-chain alpha-keto acid dehydrogenase complex, mitochondrial	DBT	tr|Q5VVL7|Q5VVL7_HUMAN Dihydrolipoamide acetyltransferase component of pyruvate dehydrogenase complex OS=Homo sapiens OX=9606 GN=DBT PE=1 SV=1;tr|A0A7P0Z494|A0A7P0Z494_HUMAN Dihydrolipoamide acetyltransferase component of pyruvate dehydrogenase complex OS=	4	3	3	3	1	1	2	0	0	0	0	0	0	1	1	2	0	0	0	0	0	0	1	1	2	0	0	0	0	0	0	9.4	9.4	9.4	36.238	320	320;524;482;301	0	3.0282	2.8	2.8	6.6
A0A5K1VW66;P35240	A0A5K1VW66;P35240	2;2	2;2	2;2	Merlin	NF2	tr|A0A5K1VW66|A0A5K1VW66_HUMAN NF2, moesin-ezrin-radixin like (MERLIN) tumor suppressor (Fragment) OS=Homo sapiens OX=9606 GN=NF2 PE=1 SV=1;sp|P35240|MERL_HUMAN Merlin OS=Homo sapiens OX=9606 GN=NF2 PE=1 SV=1	2	2	2	2	0	0	1	0	0	0	2	0	1	0	0	1	0	0	0	2	0	1	0	0	1	0	0	0	2	0	1	5	5	5	47.145	401	401;595	0	4.6772	0	0	2.5
P53355	P53355	4	4	4	Death-associated protein kinase 1	DAPK1	sp|P53355|DAPK1_HUMAN Death-associated protein kinase 1 OS=Homo sapiens OX=9606 GN=DAPK1 PE=1 SV=6	1	4	4	4	2	1	2	0	0	0	0	0	0	2	1	2	0	0	0	0	0	0	2	1	2	0	0	0	0	0	0	4	4	4	160.04	1430	1430	0	3.8807	1.9	1	2.1
Q9Y265;E7ETR0	Q9Y265;E7ETR0	2;1	2;1	2;1	RuvB-like 1	RUVBL1	sp|Q9Y265|RUVB1_HUMAN RuvB-like 1 OS=Homo sapiens OX=9606 GN=RUVBL1 PE=1 SV=1;tr|E7ETR0|E7ETR0_HUMAN RuvB-like helicase OS=Homo sapiens OX=9606 GN=RUVBL1 PE=1 SV=1	2	2	2	2	1	1	2	0	0	0	1	1	2	1	1	2	0	0	0	1	1	2	1	1	2	0	0	0	1	1	2	5	5	5	50.227	456	456;315	0.004	1.8424	2.6	2.6	5
Q6ZVX7	Q6ZVX7	1	1	1	F-box only protein 50	NCCRP1	sp|Q6ZVX7|FBX50_HUMAN F-box only protein 50 OS=Homo sapiens OX=9606 GN=NCCRP1 PE=1 SV=1	1	1	1	1	1	0	1	1	1	1	0	0	0	1	0	1	1	1	1	0	0	0	1	0	1	1	1	1	0	0	0	4	4	4	30.847	275	275	0.0040241	1.8673	4	0	4
P15259;P18669;Q8N0Y7	P15259;P18669	3;3;1	3;3;1	3;3;1	Phosphoglycerate mutase 2;Phosphoglycerate mutase 1	PGAM2;PGAM1	sp|P15259|PGAM2_HUMAN Phosphoglycerate mutase 2 OS=Homo sapiens OX=9606 GN=PGAM2 PE=1 SV=3;sp|P18669|PGAM1_HUMAN Phosphoglycerate mutase 1 OS=Homo sapiens OX=9606 GN=PGAM1 PE=1 SV=2	3	3	3	3	1	1	0	1	2	0	0	0	0	1	1	0	1	2	0	0	0	0	1	1	0	1	2	0	0	0	0	12.3	12.3	12.3	28.766	253	253;254;254	0	2.7011	4	4.3	0
Q5QPM0;Q5QPL9;Q9UKM9;Q5QPM2;Q5QPM1	Q5QPM0;Q5QPL9;Q9UKM9;Q5QPM2;Q5QPM1	2;2;2;1;1	2;2;2;1;1	2;2;2;1;1	RNA-binding protein Raly	RALY	tr|Q5QPM0|Q5QPM0_HUMAN RALY heterogeneous nuclear ribonucleoprotein (Fragment) OS=Homo sapiens OX=9606 GN=RALY PE=1 SV=8;tr|Q5QPL9|Q5QPL9_HUMAN RALY heterogeneous nuclear ribonucleoprotein (Fragment) OS=Homo sapiens OX=9606 GN=RALY PE=1 SV=1;sp|Q9UKM9|RALY	5	2	2	2	1	1	2	0	0	0	0	0	0	1	1	2	0	0	0	0	0	0	1	1	2	0	0	0	0	0	0	12.3	12.3	12.3	18.66	171	171;237;306;89;181	0	2.601	5.3	5.3	12.3
A0A087WXI2;Q9Y6R7	A0A087WXI2;Q9Y6R7	2;2	2;2	2;2	IgGFc-binding protein	FCGBP	tr|A0A087WXI2|A0A087WXI2_HUMAN Fc gamma binding protein OS=Homo sapiens OX=9606 GN=FCGBP PE=1 SV=3;sp|Q9Y6R7|FCGBP_HUMAN IgGFc-binding protein OS=Homo sapiens OX=9606 GN=FCGBP PE=1 SV=3	2	2	2	2	1	1	0	0	1	0	0	2	0	1	1	0	0	1	0	0	2	0	1	1	0	0	1	0	0	2	0	1.3	1.3	1.3	445.21	4204	4204;5405	0.0021786	2.2981	0.8	0.5	0
P07602;A0A0J9YXB8	P07602;A0A0J9YXB8	2;1	2;1	2;1	Prosaposin;Saposin-A;Saposin-B-Val;Saposin-B;Saposin-C;Saposin-D	PSAP	sp|P07602|SAP_HUMAN Prosaposin OS=Homo sapiens OX=9606 GN=PSAP PE=1 SV=2;tr|A0A0J9YXB8|A0A0J9YXB8_HUMAN Prosaposin (Fragment) OS=Homo sapiens OX=9606 GN=PSAP PE=1 SV=1	2	2	2	2	0	0	1	0	1	0	2	0	0	0	0	1	0	1	0	2	0	0	0	0	1	0	1	0	2	0	0	5	5	5	58.112	524	524;167	0	2.4544	0	0	2.7
Q8N3R9	Q8N3R9	2	2	2	MAGUK p55 subfamily member 5	MPP5	sp|Q8N3R9|PALS1_HUMAN Protein PALS1 OS=Homo sapiens OX=9606 GN=PALS1 PE=1 SV=3	1	2	2	2	0	1	1	0	0	0	1	0	0	0	1	1	0	0	0	1	0	0	0	1	1	0	0	0	1	0	0	3.6	3.6	3.6	77.293	675	675	0.0077071	1.6044	0	1.5	1.5
F5H1D4	F5H1D4	1	1	1		ANKLE2	tr|F5H1D4|F5H1D4_HUMAN Ankyrin repeat and LEM domain containing 2 (Fragment) OS=Homo sapiens OX=9606 GN=ANKLE2 PE=1 SV=1	1	1	1	1	0	0	0	1	1	0	0	0	0	0	0	0	1	1	0	0	0	0	0	0	0	1	1	0	0	0	0	3.5	3.5	3.5	28.383	258	258	0.0077821	1.6616	0	0	0
I3L3P7;P62244;H3BVC7;I3L246;H3BN98	I3L3P7;P62244;H3BVC7;I3L246;H3BN98	2;2;1;1;1	2;2;1;1;1	2;2;1;1;1	40S ribosomal protein S15a	RPS15A	tr|I3L3P7|I3L3P7_HUMAN 40S ribosomal protein S15a OS=Homo sapiens OX=9606 GN=RPS15A PE=1 SV=1;sp|P62244|RS15A_HUMAN 40S ribosomal protein S15a OS=Homo sapiens OX=9606 GN=RPS15A PE=1 SV=2;tr|H3BVC7|H3BVC7_HUMAN Ribosomal protein S15a (Fragment) OS=Homo sapi	5	2	2	2	0	0	0	0	0	0	0	2	1	0	0	0	0	0	0	0	2	1	0	0	0	0	0	0	0	2	1	17	17	17	11.477	100	100;130;58;111;237	0.003992	1.8314	0	0	0
P52597	P52597	2	1	1	Heterogeneous nuclear ribonucleoprotein F;Heterogeneous nuclear ribonucleoprotein F, N-terminally processed	HNRNPF	sp|P52597|HNRPF_HUMAN Heterogeneous nuclear ribonucleoprotein F OS=Homo sapiens OX=9606 GN=HNRNPF PE=1 SV=3	1	2	1	1	1	1	1	1	1	1	2	2	2	0	0	0	0	0	0	1	1	1	0	0	0	0	0	0	1	1	1	6.3	3.9	3.9	45.671	415	415	0	2.9626	2.4	2.4	2.4
P22735;H0YMQ8	P22735	3;1	3;1	3;1	Protein-glutamine gamma-glutamyltransferase K	TGM1	sp|P22735|TGM1_HUMAN Protein-glutamine gamma-glutamyltransferase K OS=Homo sapiens OX=9606 GN=TGM1 PE=1 SV=4	2	3	3	3	1	0	0	2	2	1	1	0	0	1	0	0	2	2	1	1	0	0	1	0	0	2	2	1	1	0	0	4.7	4.7	4.7	89.786	817	817;128	0	2.7071	1.3	0	0
P00747	P00747	1	1	1	Plasminogen;Plasmin heavy chain A;Activation peptide;Angiostatin;Plasmin heavy chain A, short form;Plasmin light chain B	PLG	sp|P00747|PLMN_HUMAN Plasminogen OS=Homo sapiens OX=9606 GN=PLG PE=1 SV=2	1	1	1	1	0	1	0	0	0	0	0	0	0	0	1	0	0	0	0	0	0	0	0	1	0	0	0	0	0	0	0	4.6	4.6	4.6	90.568	810	810	0	3.5182	0	4.6	0
F8VQ14;F5GWF6;P78371	F8VQ14;F5GWF6;P78371	1;1;1	1;1;1	1;1;1	T-complex protein 1 subunit beta	CCT2	tr|F8VQ14|F8VQ14_HUMAN T-complex protein 1 subunit beta OS=Homo sapiens OX=9606 GN=CCT2 PE=1 SV=1;tr|F5GWF6|F5GWF6_HUMAN T-complex protein 1 subunit beta OS=Homo sapiens OX=9606 GN=CCT2 PE=1 SV=2;sp|P78371|TCPB_HUMAN T-complex protein 1 subunit beta OS=Hom	3	1	1	1	1	1	0	0	1	1	1	0	1	1	1	0	0	1	1	1	0	1	1	1	0	0	1	1	1	0	1	3.4	3.4	3.4	44.812	416	416;530;535	0.009542	1.5722	3.4	3.4	0
A0A2R8Y5E5;A8MX94;P09211	A0A2R8Y5E5;A8MX94;P09211	1;1;1	1;1;1	1;1;1	Glutathione S-transferase P	GSTP1	tr|A0A2R8Y5E5|A0A2R8Y5E5_HUMAN Glutathione S-transferase pi 1 OS=Homo sapiens OX=9606 GN=GSTP1 PE=1 SV=1;tr|A8MX94|A8MX94_HUMAN Glutathione S-transferase OS=Homo sapiens OX=9606 GN=GSTP1 PE=1 SV=1;sp|P09211|GSTP1_HUMAN Glutathione S-transferase P OS=Homo s	3	1	1	1	1	1	1	0	0	0	0	0	0	1	1	1	0	0	0	0	0	0	1	1	1	0	0	0	0	0	0	19	19	19	6.185	58	58;174;210	0.0076628	1.5897	19	19	19
J3QRU1;P07947;P06241;E9PJ92;E9PKQ8;P06239;P12931	J3QRU1;P07947;P06241	3;3;2;1;1;1;1	3;3;2;1;1;1;1	3;3;2;1;1;1;1	Non-specific protein-tyrosine kinase;Tyrosine-protein kinase Yes;Tyrosine-protein kinase Fyn	YES1;FYN	tr|J3QRU1|J3QRU1_HUMAN Tyrosine-protein kinase OS=Homo sapiens OX=9606 GN=YES1 PE=1 SV=1;sp|P07947|YES_HUMAN Tyrosine-protein kinase Yes OS=Homo sapiens OX=9606 GN=YES1 PE=1 SV=3;sp|P06241|FYN_HUMAN Tyrosine-protein kinase Fyn OS=Homo sapiens OX=9606 GN=FY	7	3	3	3	0	2	1	0	0	0	0	0	0	0	2	1	0	0	0	0	0	0	0	2	1	0	0	0	0	0	0	4.9	4.9	4.9	61.386	548	548;543;537;458;567;509;536	0.0021459	2.2264	0	3.1	1.8
F6RY50;Q96FS4	F6RY50;Q96FS4	3;3	3;3	3;3	Signal-induced proliferation-associated protein 1	SIPA1	tr|F6RY50|F6RY50_HUMAN Signal-induced proliferation-associated 1 OS=Homo sapiens OX=9606 GN=SIPA1 PE=1 SV=1;sp|Q96FS4|SIPA1_HUMAN Signal-induced proliferation-associated protein 1 OS=Homo sapiens OX=9606 GN=SIPA1 PE=1 SV=1	2	3	3	3	2	1	2	0	0	0	0	0	0	2	1	2	0	0	0	0	0	0	2	1	2	0	0	0	0	0	0	4.3	4.3	4.3	101.82	940	940;1042	0	4.0571	3.1	1.2	2.7
A0A8I5KZ07;Q5JR04;A0A8I5KXC3;Q9HCE1	A0A8I5KZ07;Q5JR04;A0A8I5KXC3;Q9HCE1	2;2;2;2	2;2;2;2	2;2;2;2	Putative helicase MOV-10	MOV10	tr|A0A8I5KZ07|A0A8I5KZ07_HUMAN RNA helicase OS=Homo sapiens OX=9606 GN=MOV10 PE=1 SV=1;tr|Q5JR04|Q5JR04_HUMAN RNA helicase OS=Homo sapiens OX=9606 GN=MOV10 PE=1 SV=1;tr|A0A8I5KXC3|A0A8I5KXC3_HUMAN RNA helicase OS=Homo sapiens OX=9606 GN=MOV10 PE=1 SV=1;sp|	4	2	2	2	0	0	0	1	0	0	1	2	0	0	0	0	1	0	0	1	2	0	0	0	0	1	0	0	1	2	0	2.3	2.3	2.3	106.25	937	937;947;1023;1003	0.002079	2.053	0	0	0
A0A2R8Y7C0;P69905	A0A2R8Y7C0;P69905	3;3	1;1	1;1	Hemoglobin subunit alpha	HBA1	tr|A0A2R8Y7C0|A0A2R8Y7C0_HUMAN Hemoglobin subunit alpha 2 (Fragment) OS=Homo sapiens OX=9606 GN=HBA2 PE=1 SV=1;sp|P69905|HBA_HUMAN Hemoglobin subunit alpha OS=Homo sapiens OX=9606 GN=HBA1 PE=1 SV=2	2	3	1	1	0	1	1	1	1	0	0	1	0	0	0	1	0	0	0	0	0	0	0	0	1	0	0	0	0	0	0	24.6	11.2	11.2	13.842	134	134;142	0	2.7358	0	6.7	11.2
Q13492;E9PJT1;E9PK13;H0YCY1;H0YEF7;H0YEH1	Q13492;E9PJT1;E9PK13;H0YCY1;H0YEF7;H0YEH1	2;1;1;1;1;1	2;1;1;1;1;1	2;1;1;1;1;1	Phosphatidylinositol-binding clathrin assembly protein	PICALM	sp|Q13492|PICAL_HUMAN Phosphatidylinositol-binding clathrin assembly protein OS=Homo sapiens OX=9606 GN=PICALM PE=1 SV=2;tr|E9PJT1|E9PJT1_HUMAN Phosphatidylinositol binding clathrin assembly protein OS=Homo sapiens OX=9606 GN=PICALM PE=1 SV=1;tr|E9PK13|E9P	6	2	2	2	0	0	2	0	0	0	1	1	0	0	0	2	0	0	0	1	1	0	0	0	2	0	0	0	1	1	0	3.8	3.8	3.8	70.754	652	652;48;105;244;302;308	0.0020747	2.0504	0	0	3.8
Q02224	Q02224	1	1	1	Centromere-associated protein E	CENPE	sp|Q02224|CENPE_HUMAN Centromere-associated protein E OS=Homo sapiens OX=9606 GN=CENPE PE=1 SV=2	1	1	1	1	0	0	0	0	0	0	0	1	0	0	0	0	0	0	0	0	1	0	0	0	0	0	0	0	0	1	0	0.4	0.4	0.4	316.41	2701	2701	0.0077519	1.6358	0	0	0
P05387;H0YDD8	P05387;H0YDD8	2;1	2;1	2;1	60S acidic ribosomal protein P2	RPLP2	sp|P05387|RLA2_HUMAN 60S acidic ribosomal protein P2 OS=Homo sapiens OX=9606 GN=RPLP2 PE=1 SV=1;tr|H0YDD8|H0YDD8_HUMAN 60S acidic ribosomal protein P2 (Fragment) OS=Homo sapiens OX=9606 GN=RPLP2 PE=1 SV=1	2	2	2	2	1	0	1	0	0	0	1	1	0	1	0	1	0	0	0	1	1	0	1	0	1	0	0	0	1	1	0	24.3	24.3	24.3	11.665	115	115;92	0	2.531	13.9	0	10.4
E9PHY5;A0A994J5B1;O43491;E9PJP4;E9PQN0;E9PRG1;E9PIG0;E9PQD2;Q6ZSX4;E9PN54;Q6R5J7;E9PII3;E9PK52	E9PHY5;A0A994J5B1;O43491;E9PJP4;E9PQN0;E9PRG1;E9PIG0;E9PQD2;Q6ZSX4;E9PN54;Q6R5J7;E9PII3;E9PK52	2;2;2;1;1;1;1;1;1;1;1;1;1	2;2;2;1;1;1;1;1;1;1;1;1;1	2;2;2;1;1;1;1;1;1;1;1;1;1	Band 4.1-like protein 2	EPB41L2	tr|E9PHY5|E9PHY5_HUMAN Erythrocyte membrane protein band 4.1 like 2 OS=Homo sapiens OX=9606 GN=EPB41L2 PE=1 SV=1;tr|A0A994J5B1|A0A994J5B1_HUMAN Erythrocyte membrane protein band 4.1 like 2 OS=Homo sapiens OX=9606 GN=EPB41L2 PE=4 SV=1;sp|O43491|E41L2_HUMAN	13	2	2	2	1	1	1	0	0	0	1	1	1	1	1	1	0	0	0	1	1	1	1	1	1	0	0	0	1	1	1	2.6	2.6	2.6	104.36	935	935;1057;1005;118;127;153;162;179;201;240;383;706;811	0.0022173	2.3479	1.3	1.3	1.3
A0A7I2V5R3;H9KV48;A0A7I2V2D2;E9PGN7;P05155	A0A7I2V5R3;H9KV48;A0A7I2V2D2;E9PGN7;P05155	2;2;2;2;2	2;2;2;2;2	2;2;2;2;2	Plasma protease C1 inhibitor	SERPING1	tr|A0A7I2V5R3|A0A7I2V5R3_HUMAN Serpin family G member 1 OS=Homo sapiens OX=9606 GN=SERPING1 PE=1 SV=1;tr|H9KV48|H9KV48_HUMAN Serpin family G member 1 OS=Homo sapiens OX=9606 GN=SERPING1 PE=1 SV=1;tr|A0A7I2V2D2|A0A7I2V2D2_HUMAN Serpin family G member 1 OS=H	5	2	2	2	0	0	0	0	1	1	0	0	1	0	0	0	0	1	1	0	0	1	0	0	0	0	1	1	0	0	1	4.7	4.7	4.7	41.671	382	382;463;482;543;500	0	2.6625	0	0	0
H0YLE8;P46940;E9PDT6;A0A0J9YXZ5;F5H7S7;F2Z2E2;Q13576;Q86VI3	H0YLE8;P46940;E9PDT6;A0A0J9YXZ5;F5H7S7;F2Z2E2;Q13576;Q86VI3	2;2;1;1;1;1;1;1	2;2;1;1;1;1;1;1	2;2;1;1;1;1;1;1	Ras GTPase-activating-like protein IQGAP1;Ras GTPase-activating-like protein IQGAP2;Ras GTPase-activating-like protein IQGAP3	IQGAP1;IQGAP2;IQGAP3	tr|H0YLE8|H0YLE8_HUMAN IQ motif containing GTPase activating protein 1 OS=Homo sapiens OX=9606 GN=IQGAP1 PE=1 SV=1;sp|P46940|IQGA1_HUMAN Ras GTPase-activating-like protein IQGAP1 OS=Homo sapiens OX=9606 GN=IQGAP1 PE=1 SV=1;tr|E9PDT6|E9PDT6_HUMAN IQ motif c	8	2	2	2	2	1	1	0	0	0	0	0	0	2	1	1	0	0	0	0	0	0	2	1	1	0	0	0	0	0	0	1.8	1.8	1.8	124.79	1085	1085;1657;509;1191;1525;1588;1575;1631	0.0040161	1.8486	1.8	1	1
V9GYJ8;K7ER74;P02655	V9GYJ8;K7ER74;P02655	1;1;1	1;1;1	1;1;1	Apolipoprotein C-II;Proapolipoprotein C-II	APOC2;APOC4-APOC2	tr|V9GYJ8|V9GYJ8_HUMAN Apolipoprotein C-II OS=Homo sapiens OX=9606 GN=APOC2 PE=3 SV=1;tr|K7ER74|K7ER74_HUMAN Apolipoprotein C-II OS=Homo sapiens OX=9606 GN=APOC4-APOC2 PE=1 SV=1;sp|P02655|APOC2_HUMAN Apolipoprotein C-II OS=Homo sapiens OX=9606 GN=APOC2 PE=	3	1	1	1	0	1	1	0	0	0	0	0	0	0	1	1	0	0	0	0	0	0	0	1	1	0	0	0	0	0	0	24.1	24.1	24.1	9.5768	87	87;178;101	0	5.5403	0	24.1	24.1
F8W8M4;A0A3B3IS55;O14639;H0Y7N6;F6XFR5;A0A494C1P1;A0A494C1G0	F8W8M4;A0A3B3IS55;O14639;H0Y7N6;F6XFR5;A0A494C1P1;A0A494C1G0	3;3;3;2;2;2;2	3;3;3;2;2;2;2	3;3;3;2;2;2;2	Actin-binding LIM protein 1	ABLIM1	tr|F8W8M4|F8W8M4_HUMAN Actin-binding LIM protein 1 OS=Homo sapiens OX=9606 GN=ABLIM1 PE=1 SV=1;tr|A0A3B3IS55|A0A3B3IS55_HUMAN Actin binding LIM protein 1 OS=Homo sapiens OX=9606 GN=ABLIM1 PE=1 SV=1;sp|O14639|ABLM1_HUMAN Actin-binding LIM protein 1 OS=Homo	7	3	3	3	0	0	0	0	0	0	2	1	1	0	0	0	0	0	0	2	1	1	0	0	0	0	0	0	2	1	1	6	6	6	81.104	718	718;834;778;172;173;426;502	0	3.3518	0	0	0
P14649;A0A8Q3SIC5;A0A8Q3SIF0	P14649;A0A8Q3SIC5	3;3;1	1;1;1	1;1;1	Myosin light chain 6B	MYL6B	sp|P14649|MYL6B_HUMAN Myosin light chain 6B OS=Homo sapiens OX=9606 GN=MYL6B PE=1 SV=1;tr|A0A8Q3SIC5|A0A8Q3SIC5_HUMAN Myosin light chain 6B OS=Homo sapiens OX=9606 GN=MYL6B PE=1 SV=1	3	3	1	1	2	3	3	2	1	2	1	2	2	0	1	1	0	0	0	0	0	0	0	1	1	0	0	0	0	0	0	15.9	4.3	4.3	22.764	208	208;217;160	0.0058708	1.6876	11.5	15.9	15.9
J3KSR8;J3KTL2;Q07955	J3KSR8;J3KTL2;Q07955	3;3;3	3;3;3	3;3;3	Serine/arginine-rich splicing factor 1	SRSF1	tr|J3KSR8|J3KSR8_HUMAN Serine/arginine-rich splicing factor 1 (Fragment) OS=Homo sapiens OX=9606 GN=SRSF1 PE=1 SV=1;tr|J3KTL2|J3KTL2_HUMAN Serine/arginine-rich splicing factor 1 OS=Homo sapiens OX=9606 GN=SRSF1 PE=1 SV=1;sp|Q07955|SRSF1_HUMAN Serine/argini	3	3	3	3	1	1	0	1	0	0	0	0	1	1	1	0	1	0	0	0	0	1	1	1	0	1	0	0	0	0	1	22.4	22.4	22.4	16.34	143	143;253;248	0.0021368	2.2118	8.4	7	0
A0A2R8YDY7;A0A2R8YEW1;V9GYA2;A0A2R8Y4D6;A0A2R8Y4H0;A0A2R8Y5A0;A0A2R8YF43;A0A2R8YD58;E7EU96;Q8NEV1;P68400	A0A2R8YDY7;A0A2R8YEW1;V9GYA2;A0A2R8Y4D6;A0A2R8Y4H0;A0A2R8Y5A0;A0A2R8YF43;A0A2R8YD58;E7EU96;Q8NEV1;P68400	1;1;1;1;1;1;1;1;1;1;1	1;1;1;1;1;1;1;1;1;1;1	1;1;1;1;1;1;1;1;1;1;1	Casein kinase II subunit alpha 3;Casein kinase II subunit alpha	CSNK2A1;CSNK2A3	tr|A0A2R8YDY7|A0A2R8YDY7_HUMAN Casein kinase 2 alpha 1 (Fragment) OS=Homo sapiens OX=9606 GN=CSNK2A1 PE=1 SV=1;tr|A0A2R8YEW1|A0A2R8YEW1_HUMAN Casein kinase 2 alpha 1 (Fragment) OS=Homo sapiens OX=9606 GN=CSNK2A1 PE=1 SV=1;tr|V9GYA2|V9GYA2_HUMAN Casein kina	11	1	1	1	1	1	1	0	0	0	0	0	0	1	1	1	0	0	0	0	0	0	1	1	1	0	0	0	0	0	0	11.5	11.5	11.5	15.604	131	131;133;144;207;256;354;363;376;385;391;391	0.0094877	1.5455	11.5	11.5	11.5
A0A087WUM5;Q5VZR0;Q9H4G4	A0A087WUM5;Q5VZR0;Q9H4G4	1;1;1	1;1;1	1;1;1	Golgi-associated plant pathogenesis-related protein 1	GLIPR2	tr|A0A087WUM5|A0A087WUM5_HUMAN GLI pathogenesis related 2 OS=Homo sapiens OX=9606 GN=GLIPR2 PE=1 SV=1;tr|Q5VZR0|Q5VZR0_HUMAN GLI pathogenesis related 2 OS=Homo sapiens OX=9606 GN=GLIPR2 PE=1 SV=1;sp|Q9H4G4|GAPR1_HUMAN Golgi-associated plant pathogenesis-re	3	1	1	1	1	1	0	0	0	0	1	1	1	1	1	0	0	0	0	1	1	1	1	1	0	0	0	0	1	1	1	18.1	18.1	18.1	7.8481	72	72;128;154	0.0022422	2.4081	18.1	18.1	0
A0A075B7B5;B7ZM87;O75044;A0A286YEY3;P0DMP2;P0DJJ0;A0A075B743;E9PDX4;A0A087X0L1;Q5VZB4;G5EA48;Q7Z6B7	A0A075B7B5;B7ZM87;O75044;A0A286YEY3;P0DMP2;P0DJJ0	3;3;3;2;2;2;1;1;1;1;1;1	3;3;3;2;2;2;1;1;1;1;1;1	3;3;3;2;2;2;1;1;1;1;1;1	SLIT-ROBO Rho GTPase-activating protein 2;SLIT-ROBO Rho GTPase-activating protein 2B;SLIT-ROBO Rho GTPase-activating protein 2C	SRGAP2;SRGAP2B;SRGAP2C	tr|A0A075B7B5|A0A075B7B5_HUMAN SLIT-ROBO Rho GTPase activating protein 2 OS=Homo sapiens OX=9606 GN=SRGAP2 PE=1 SV=1;tr|B7ZM87|B7ZM87_HUMAN SLIT-ROBO Rho GTPase activating protein 2 OS=Homo sapiens OX=9606 GN=SRGAP2 PE=1 SV=1;sp|O75044|SRGP2_HUMAN SLIT-ROB	12	3	3	3	1	2	1	0	0	0	0	0	0	1	2	1	0	0	0	0	0	0	1	2	1	0	0	0	0	0	0	4.1	4.1	4.1	90.908	789	789;1070;1071;459;458;459;118;305;305;450;1022;1085	0.0020964	2.087	1.3	2.8	1.3
Q2L6G8;G8JLG2;Q15517	Q2L6G8;G8JLG2;Q15517	1;1;1	1;1;1	1;1;1	Corneodesmosin	CDSN	tr|Q2L6G8|Q2L6G8_HUMAN Corneodesmosin OS=Homo sapiens OX=9606 GN=CDSN PE=1 SV=1;tr|G8JLG2|G8JLG2_HUMAN Corneodesmosin OS=Homo sapiens OX=9606 GN=CDSN PE=1 SV=1;sp|Q15517|CDSN_HUMAN Corneodesmosin OS=Homo sapiens OX=9606 GN=CDSN PE=1 SV=3	3	1	1	1	0	1	0	0	0	0	0	0	1	0	1	0	0	0	0	0	0	1	0	1	0	0	0	0	0	0	1	3.4	3.4	3.4	51.539	529	529;529;529	0.0021277	2.1946	0	3.4	0
Q12959;A0A590UK81;A0A0C4DFT3;A0A590UKA8;A0A590UJC5;A0A590UJR5;A0A590UJ08;A0A590UJ81;A0A590UJ18;A0A590UJ68;A0A590UJS9;A0A590UJX2;A0A590UK48;A0A590UJR4;A0A590UJ29;A0A590UJ64;E7EQD7;A0A590UK02;A0A590UK70;A0A590UJL2;A0A590UJ25;A0A590UJD9;A0A590UJ86;A0A590UJZ4;B4E2H8;A0A590UK52;A0A590UJ95;H7C166;C9JN61;C9IYP1	Q12959;A0A590UK81;A0A0C4DFT3;A0A590UKA8;A0A590UJC5;A0A590UJR5;A0A590UJ08;A0A590UJ81;A0A590UJ18;A0A590UJ68;A0A590UJS9;A0A590UJX2;A0A590UK48;A0A590UJR4;A0A590UJ29;A0A590UJ64;E7EQD7;A0A590UK02;A0A590UK70;A0A590UJL2;A0A590UJ25;A0A590UJD9;A0A590UJ86;A0A590UJZ4;B4E2H8;A0A590UK52;A0A590UJ95;H7C166;C9JN61;C9IYP1	2;2;2;2;2;2;2;2;2;2;2;2;2;2;2;2;2;2;2;2;2;2;1;1;1;1;1;1;1;1	2;2;2;2;2;2;2;2;2;2;2;2;2;2;2;2;2;2;2;2;2;2;1;1;1;1;1;1;1;1	2;2;2;2;2;2;2;2;2;2;2;2;2;2;2;2;2;2;2;2;2;2;1;1;1;1;1;1;1;1	Disks large homolog 1	DLG1	sp|Q12959|DLG1_HUMAN Disks large homolog 1 OS=Homo sapiens OX=9606 GN=DLG1 PE=1 SV=2;tr|A0A590UK81|A0A590UK81_HUMAN Discs large MAGUK scaffold protein 1 OS=Homo sapiens OX=9606 GN=DLG1 PE=1 SV=1;tr|A0A0C4DFT3|A0A0C4DFT3_HUMAN Discs large MAGUK scaffold pro	30	2	2	2	0	0	1	0	0	0	1	1	0	0	0	1	0	0	0	1	1	0	0	0	1	0	0	0	1	1	0	2.4	2.4	2.4	100.45	904	904;772;892;883;879;878;875;874;868;865;839;833;821;819;744;689;658;628;587;575;570;925;186;375;370;311;300;286;250;122	0.0022026	2.3304	0	0	1.1
O95294	O95294	1	1	1	RasGAP-activating-like protein 1	RASAL1	sp|O95294|RASL1_HUMAN RasGAP-activating-like protein 1 OS=Homo sapiens OX=9606 GN=RASAL1 PE=1 SV=3	1	1	1	1	0	0	0	0	0	1	0	0	0	0	0	0	0	0	1	0	0	0	0	0	0	0	0	1	0	0	0	1.9	1.9	1.9	90.015	804	804	0.0021322	2.2004	0	0	0
P04040	P04040	1	1	1	Catalase	CAT	sp|P04040|CATA_HUMAN Catalase OS=Homo sapiens OX=9606 GN=CAT PE=1 SV=3	1	1	1	1	0	0	0	1	0	1	1	0	0	0	0	0	1	0	1	1	0	0	0	0	0	1	0	1	1	0	0	2.5	2.5	2.5	59.755	527	527	0.007767	1.6494	0	0	0
A0A494BZV2;H0Y2S9;H0Y7E2;H7C3G6;J3KSK7;A0A1W2PPU9;J3QRL2;A8MZF8;K7EJ14;J3QL44;F6WMF4;K7EL39;F6WYE2;F6TR96;H0Y5J9;Q9H2D6	A0A494BZV2;H0Y2S9	47;26;14;12;7;4;3;2;1;1;1;1;1;1;1;1	1;1;0;1;0;0;0;0;0;1;0;0;0;0;0;0	0;0;0;0;0;0;0;0;0;0;0;0;0;0;0;0		MPRIP	tr|A0A494BZV2|A0A494BZV2_HUMAN Myosin phosphatase Rho interacting protein OS=Homo sapiens OX=9606 GN=MPRIP PE=1 SV=1;tr|H0Y2S9|H0Y2S9_HUMAN Myosin phosphatase Rho interacting protein (Fragment) OS=Homo sapiens OX=9606 GN=MPRIP PE=1 SV=3	16	47	1	0	30	32	37	3	5	3	25	21	19	1	1	0	0	0	0	1	1	0	0	0	0	0	0	0	0	0	0	22.1	0.5	0	274.38	2425	2425;1794;1091;277;139;294;181;63;28;59;83;95;256;265;311;2365	0.0039761	1.7816	16.1	16.3	17.6
G3V3R1;P49757;G3V4S6;G3V433;G3V3M5	G3V3R1;P49757;G3V4S6;G3V433;G3V3M5	2;2;1;1;1	2;2;1;1;1	2;2;1;1;1	Protein numb homolog	NUMB	tr|G3V3R1|G3V3R1_HUMAN NUMB endocytic adaptor protein (Fragment) OS=Homo sapiens OX=9606 GN=NUMB PE=1 SV=1;sp|P49757|NUMB_HUMAN Protein numb homolog OS=Homo sapiens OX=9606 GN=NUMB PE=1 SV=2;tr|G3V4S6|G3V4S6_HUMAN NUMB endocytic adaptor protein (Fragment)	5	2	2	2	1	1	2	0	0	0	0	0	0	1	1	2	0	0	0	0	0	0	1	1	2	0	0	0	0	0	0	8.5	8.5	8.5	28.978	258	258;651;67;80;223	0.0020243	1.906	4.3	4.3	8.5
G5E972;P42167;H0YJH7;P42166	G5E972;P42167;H0YJH7;P42166	3;3;2;2	3;3;2;2	3;3;2;2	Lamina-associated polypeptide 2, isoforms beta/gamma;Thymopoietin;Thymopentin;Lamina-associated polypeptide 2, isoform alpha;Thymopoietin;Thymopentin	TMPO	tr|G5E972|G5E972_HUMAN Thymopoietin OS=Homo sapiens OX=9606 GN=TMPO PE=1 SV=1;sp|P42167|LAP2B_HUMAN Lamina-associated polypeptide 2, isoforms beta/gamma OS=Homo sapiens OX=9606 GN=TMPO PE=1 SV=2;tr|H0YJH7|H0YJH7_HUMAN Thymopoietin (Fragment) OS=Homo sapien	4	3	3	3	1	0	1	0	0	0	1	0	0	1	0	1	0	0	0	1	0	0	1	0	1	0	0	0	1	0	0	9.2	9.2	9.2	46.306	414	414;454;237;694	0.0021097	2.188	3.1	0	3.1
G3V279;P84090	G3V279;P84090	1;1	1;1	1;1	Enhancer of rudimentary homolog	ERH	tr|G3V279|G3V279_HUMAN Enhancer of rudimentary homolog OS=Homo sapiens OX=9606 GN=ERH PE=1 SV=1;sp|P84090|ERH_HUMAN Enhancer of rudimentary homolog OS=Homo sapiens OX=9606 GN=ERH PE=1 SV=1	2	1	1	1	0	0	0	1	0	0	1	1	1	0	0	0	1	0	0	1	1	1	0	0	0	1	0	0	1	1	1	15.5	15.5	15.5	8.2033	71	71;104	0.0020492	1.9723	0	0	0
F5H3Y4;Q8IY37	F5H3Y4;Q8IY37	2;2	2;2	2;2	Probable ATP-dependent RNA helicase DHX37	DHX37	tr|F5H3Y4|F5H3Y4_HUMAN DEAH-box helicase 37 (Fragment) OS=Homo sapiens OX=9606 GN=DHX37 PE=1 SV=2;sp|Q8IY37|DHX37_HUMAN Probable ATP-dependent RNA helicase DHX37 OS=Homo sapiens OX=9606 GN=DHX37 PE=1 SV=1	2	2	2	2	1	2	1	0	0	0	0	0	0	1	2	1	0	0	0	0	0	0	1	2	1	0	0	0	0	0	0	2.2	2.2	2.2	110.69	999	999;1157	0	2.8008	1.3	2.2	1.3
A0A0B4J210;Q6PKG0;E5RH50;A0A8I5KSP1;A0A8I5KWU3;H0YC33	A0A0B4J210;Q6PKG0;E5RH50;A0A8I5KSP1;A0A8I5KWU3	3;3;2;2;2;1	3;3;2;2;2;1	3;3;2;2;2;1	La-related protein 1	LARP1	tr|A0A0B4J210|A0A0B4J210_HUMAN La-related protein 1 (Fragment) OS=Homo sapiens OX=9606 GN=LARP1 PE=1 SV=5;sp|Q6PKG0|LARP1_HUMAN La-related protein 1 OS=Homo sapiens OX=9606 GN=LARP1 PE=1 SV=2;tr|E5RH50|E5RH50_HUMAN La ribonucleoprotein 1, translational reg	6	3	3	3	0	0	0	0	1	0	0	1	1	0	0	0	0	1	0	0	1	1	0	0	0	0	1	0	0	1	1	4.5	4.5	4.5	90.821	815	815;1096;610;858;891;183	0	2.6609	0	0	0
P31689	P31689	2	2	2	DnaJ homolog subfamily A member 1	DNAJA1	sp|P31689|DNJA1_HUMAN DnaJ homolog subfamily A member 1 OS=Homo sapiens OX=9606 GN=DNAJA1 PE=1 SV=2	1	2	2	2	0	0	0	0	1	0	2	0	0	0	0	0	0	1	0	2	0	0	0	0	0	0	1	0	2	0	0	6.5	6.5	6.5	44.868	397	397	0.0020576	1.9805	0	0	0
O00459;E5RJY0;H0YBC2;A0A8V8TMF4;A0A8V8TLF1;A0A8V8TLF7;A0A8V8TL14;B3KWZ7;E5RHI0;A0A8V8TME9;E9PFP1;F6TDL0;A0A8V8TL31;A0A8V8TL10;Q92569;P27986	O00459;E5RJY0;H0YBC2;A0A8V8TMF4;A0A8V8TLF1;A0A8V8TLF7;A0A8V8TL14;B3KWZ7;E5RHI0;A0A8V8TME9;E9PFP1;F6TDL0;A0A8V8TL31;A0A8V8TL10;Q92569;P27986	2;1;1;1;1;1;1;1;1;1;1;1;1;1;1;1	2;1;1;1;1;1;1;1;1;1;1;1;1;1;1;1	2;1;1;1;1;1;1;1;1;1;1;1;1;1;1;1	Phosphatidylinositol 3-kinase regulatory subunit beta;Phosphatidylinositol 3-kinase regulatory subunit gamma;Phosphatidylinositol 3-kinase regulatory subunit alpha	PIK3R2;PIK3R1;PIK3R3	sp|O00459|P85B_HUMAN Phosphatidylinositol 3-kinase regulatory subunit beta OS=Homo sapiens OX=9606 GN=PIK3R2 PE=1 SV=2;tr|E5RJY0|E5RJY0_HUMAN Phosphoinositide-3-kinase regulatory subunit 1 (Fragment) OS=Homo sapiens OX=9606 GN=PIK3R1 PE=1 SV=1;tr|H0YBC2|H0	16	2	2	2	0	0	1	0	0	0	0	1	0	0	0	1	0	0	0	0	1	0	0	0	1	0	0	0	0	1	0	3.2	3.2	3.2	81.544	728	728;137;153;231;235;385;393;403;454;462;481;507;549;699;461;724	0.0020325	1.9515	0	0	1.6
M0R3F1;A0A0A0MRA5;B7Z4B8;Q9BUJ2;M0QYM5;M0QYI8;M0QYZ0	M0R3F1;A0A0A0MRA5;B7Z4B8;Q9BUJ2;M0QYM5;M0QYI8;M0QYZ0	2;2;2;2;1;1;1	2;2;2;2;1;1;1	2;2;2;2;1;1;1	Heterogeneous nuclear ribonucleoprotein U-like protein 1	HNRNPUL1	tr|M0R3F1|M0R3F1_HUMAN Heterogeneous nuclear ribonucleoprotein U like 1 (Fragment) OS=Homo sapiens OX=9606 GN=HNRNPUL1 PE=1 SV=1;tr|A0A0A0MRA5|A0A0A0MRA5_HUMAN Heterogeneous nuclear ribonucleoprotein U like 1 OS=Homo sapiens OX=9606 GN=HNRNPUL1 PE=1 SV=1;t	7	2	2	2	0	0	0	0	1	0	2	1	0	0	0	0	0	1	0	2	1	0	0	0	0	0	1	0	2	1	0	4.4	4.4	4.4	71.611	641	641;766;767;856;90;172;371	0.0021978	2.3268	0	0	0
A0A8V8TN33;E9PCY5;A0A8V8TPE3;A0A8V8TP20;P11388;Q02880;J3KTB7	A0A8V8TN33;E9PCY5;A0A8V8TPE3;A0A8V8TP20;P11388;Q02880;J3KTB7	2;2;2;2;2;2;1	2;2;2;2;2;2;1	2;2;2;2;2;2;1	DNA topoisomerase 2;DNA topoisomerase 2-alpha;DNA topoisomerase 2-beta	TOP2B;TOP2A	tr|A0A8V8TN33|A0A8V8TN33_HUMAN DNA topoisomerase 2 OS=Homo sapiens OX=9606 GN=TOP2B PE=1 SV=1;tr|E9PCY5|E9PCY5_HUMAN DNA topoisomerase 2 (Fragment) OS=Homo sapiens OX=9606 GN=TOP2B PE=1 SV=1;tr|A0A8V8TPE3|A0A8V8TPE3_HUMAN DNA topoisomerase 2 OS=Homo sapien	7	2	2	2	2	0	0	0	0	0	0	0	0	2	0	0	0	0	0	0	0	0	2	0	0	0	0	0	0	0	0	2.5	2.5	2.5	115.14	1010	1010;1150;1382;1517;1531;1626;147	0.007722	1.6109	2.5	0	0
Q14571;A0A3B3ITM1;A0A3B3ITQ4;A0A3B3ITM6	Q14571	7;1;1;1	3;0;0;0	2;0;0;0	Inositol 1,4,5-trisphosphate receptor type 2	ITPR2	sp|Q14571|ITPR2_HUMAN Inositol 1,4,5-trisphosphate receptor type 2 OS=Homo sapiens OX=9606 GN=ITPR2 PE=1 SV=2	4	7	3	2	3	2	4	0	0	0	0	1	0	2	0	1	0	0	0	0	0	0	2	0	0	0	0	0	0	0	0	2.6	1.3	1	308.06	2701	2701;175;188;714	0	2.7365	1.4	0.7	1.3
P42830	P42830	1	1	1	C-X-C motif chemokine 5;ENA-78(8-78);ENA-78(9-78)	CXCL5	sp|P42830|CXCL5_HUMAN C-X-C motif chemokine 5 OS=Homo sapiens OX=9606 GN=CXCL5 PE=1 SV=1	1	1	1	1	0	0	0	0	0	0	0	1	0	0	0	0	0	0	0	0	1	0	0	0	0	0	0	0	0	1	0	14	14	14	11.972	114	114	1	-2	0	0	0
M0R0P1;M0R299;M0QXL5;M0R2Q4;P22087;M0R2U2;M0R1H0;M0R2B0;A6NHQ2	M0R0P1;M0R299;M0QXL5;M0R2Q4;P22087;M0R2U2;M0R1H0;M0R2B0	3;3;3;3;3;2;2;2;1	3;3;3;3;3;2;2;2;1	3;3;3;3;3;2;2;2;1	rRNA 2-O-methyltransferase fibrillarin	FBL	tr|M0R0P1|M0R0P1_HUMAN Fibrillarin (Fragment) OS=Homo sapiens OX=9606 GN=FBL PE=1 SV=1;tr|M0R299|M0R299_HUMAN Fibrillarin (Fragment) OS=Homo sapiens OX=9606 GN=FBL PE=1 SV=1;tr|M0QXL5|M0QXL5_HUMAN Fibrillarin (Fragment) OS=Homo sapiens OX=9606 GN=FBL PE=1	9	3	3	3	3	0	0	0	0	0	0	0	0	3	0	0	0	0	0	0	0	0	3	0	0	0	0	0	0	0	0	18.9	18.9	18.9	24.544	228	228;229;244;273;321;157;178;182;334	0.0021692	2.2828	18.9	0	0
A0A8V8TN84;Q13009	A0A8V8TN84;Q13009	1;1	1;1	1;1	T-lymphoma invasion and metastasis-inducing protein 1	TIAM1	tr|A0A8V8TN84|A0A8V8TN84_HUMAN TIAM Rac1 associated GEF 1 OS=Homo sapiens OX=9606 GN=TIAM1 PE=1 SV=1;sp|Q13009|TIAM1_HUMAN Rho guanine nucleotide exchange factor TIAM1 OS=Homo sapiens OX=9606 GN=TIAM1 PE=1 SV=2	2	1	1	1	1	1	0	0	0	0	1	1	0	1	1	0	0	0	0	1	1	0	1	1	0	0	0	0	1	1	0	0.6	0.6	0.6	161.79	1452	1452;1591	1	-2	0.6	0.6	0
A0A994J4L7;Q92900	A0A994J4L7;Q92900	3;3	3;3	3;3	Regulator of nonsense transcripts 1	UPF1	tr|A0A994J4L7|A0A994J4L7_HUMAN UPF1 RNA helicase and ATPase OS=Homo sapiens OX=9606 GN=UPF1 PE=4 SV=1;sp|Q92900|RENT1_HUMAN Regulator of nonsense transcripts 1 OS=Homo sapiens OX=9606 GN=UPF1 PE=1 SV=2	2	3	3	3	0	0	0	1	2	0	1	1	0	0	0	0	1	2	0	1	1	0	0	0	0	1	2	0	1	1	0	2.9	2.9	2.9	122.47	1113	1113;1129	0.002045	1.9719	0	0	0
P01871	P01871	1	1	1	Ig mu chain C region	IGHM	sp|P01871|IGHM_HUMAN Immunoglobulin heavy constant mu OS=Homo sapiens OX=9606 GN=IGHM PE=1 SV=5	1	1	1	1	0	1	0	0	0	0	0	0	0	0	1	0	0	0	0	0	0	0	0	1	0	0	0	0	0	0	0	4.2	4.2	4.2	51.923	474	474	0	4.6428	0	4.2	0
A0A0B4J2B5;A0A4W8ZXM2	A0A0B4J2B5;A0A4W8ZXM2	1;1	1;1	1;1		IGHV3OR16-9	tr|A0A0B4J2B5|A0A0B4J2B5_HUMAN Immunoglobulin heavy variable 3/OR16-9 (non-functional) (Fragment) OS=Homo sapiens OX=9606 GN=IGHV3OR16-9 PE=1 SV=1;tr|A0A4W8ZXM2|A0A4W8ZXM2_HUMAN Immunoglobulin heavy variable 3-72 OS=Homo sapiens OX=9606 GN=IGHV3-72 PE=4 SV	2	1	1	1	0	0	0	1	1	0	0	0	0	0	0	0	1	1	0	0	0	0	0	0	0	1	1	0	0	0	0	19.4	19.4	19.4	10.657	98	98;101	0.0021505	2.2365	0	0	0
A0A7I2V2R3;A0A7I2V5D8;A0A7I2V402;A0A7I2V4G0;P51991;A0A7I2V4J6;H7C1J8	A0A7I2V2R3;A0A7I2V5D8;A0A7I2V402;A0A7I2V4G0;P51991;A0A7I2V4J6	3;3;3;3;3;2;1	3;3;3;3;3;2;1	3;3;3;3;3;2;1	Heterogeneous nuclear ribonucleoprotein A3	HNRNPA3	tr|A0A7I2V2R3|A0A7I2V2R3_HUMAN Heterogeneous nuclear ribonucleoprotein A3 OS=Homo sapiens OX=9606 GN=HNRNPA3 PE=1 SV=1;tr|A0A7I2V5D8|A0A7I2V5D8_HUMAN Heterogeneous nuclear ribonucleoprotein A3 OS=Homo sapiens OX=9606 GN=HNRNPA3 PE=1 SV=1;tr|A0A7I2V402|A0A7	7	3	3	3	0	0	1	0	0	0	1	1	0	0	0	1	0	0	0	1	1	0	0	0	1	0	0	0	1	1	0	13.6	13.6	13.6	35.411	331	331;348;348;396;378;377;115	0	4.9527	0	0	3
A0A2R8Y870;A0A2R8YEU8;Q96AC6	A0A2R8Y870;A0A2R8YEU8;Q96AC6	1;1;1	1;1;1	1;1;1	Kinesin-like protein KIFC2	KIFC2	tr|A0A2R8Y870|A0A2R8Y870_HUMAN Kinesin-like protein (Fragment) OS=Homo sapiens OX=9606 GN=KIFC2 PE=1 SV=1;tr|A0A2R8YEU8|A0A2R8YEU8_HUMAN Kinesin-like protein OS=Homo sapiens OX=9606 GN=KIFC2 PE=1 SV=1;sp|Q96AC6|KIFC2_HUMAN Kinesin-like protein KIFC2 OS=Hom	3	1	1	1	0	0	1	0	0	0	0	0	0	0	0	1	0	0	0	0	0	0	0	0	1	0	0	0	0	0	0	1.7	1.7	1.7	80.249	744	744;791;838	1	-2	0	0	1.7
K7EMS3	K7EMS3	3	1	1		KRT19	tr|K7EMS3|K7EMS3_HUMAN Keratin 19 (Fragment) OS=Homo sapiens OX=9606 GN=KRT19 PE=1 SV=1	1	3	1	1	1	1	1	1	2	1	1	1	1	0	0	0	0	0	1	0	0	0	0	0	0	0	0	1	0	0	0	11.6	6.1	6.1	20.186	181	181	1	-2	5	6.6	5
A0A087WVZ4;H3BUE4;H3BUI9;H3BP04;H3BSJ9;H3BRG4;P22695	A0A087WVZ4;H3BUE4;H3BUI9;H3BP04;H3BSJ9;H3BRG4;P22695	1;1;1;1;1;1;1	1;1;1;1;1;1;1	1;1;1;1;1;1;1	Cytochrome b-c1 complex subunit 2, mitochondrial	UQCRC2	tr|A0A087WVZ4|A0A087WVZ4_HUMAN Ubiquinol-cytochrome c reductase core protein 2 (Fragment) OS=Homo sapiens OX=9606 GN=UQCRC2 PE=1 SV=1;tr|H3BUE4|H3BUE4_HUMAN Ubiquinol-cytochrome c reductase core protein 2 OS=Homo sapiens OX=9606 GN=UQCRC2 PE=1 SV=1;tr|H3BU	7	1	1	1	0	1	1	0	0	0	0	0	0	0	1	1	0	0	0	0	0	0	0	1	1	0	0	0	0	0	0	20	20	20	7.5394	70	70;116;132;176;336;412;453	0	2.6382	0	20	20
P20151;M0R0M4;M0R1T3;M0QXQ7	P20151	3;1;1;1	2;1;0;0	2;1;0;0	Kallikrein-2	KLK2	sp|P20151|KLK2_HUMAN Kallikrein-2 OS=Homo sapiens OX=9606 GN=KLK2 PE=1 SV=1	4	3	2	2	1	0	1	1	2	1	1	0	1	1	0	0	1	1	1	1	0	0	1	0	0	1	1	1	1	0	0	14.9	11.5	11.5	28.671	261	261;43;69;122	0	2.6874	6.9	0	3.4
A0A8I5KW00;A0A8I5QKQ5;A0A8I5KNU9;A0A8I5KS72;A0A8I5KW33;A0A8I5KT88;P30101;A0A8I5KRV3;A0A8I5KPY2;A0A8I5KXC9	A0A8I5KW00;A0A8I5QKQ5;A0A8I5KNU9;A0A8I5KS72;A0A8I5KW33;A0A8I5KT88;P30101;A0A8I5KRV3;A0A8I5KPY2;A0A8I5KXC9	2;2;2;2;2;2;2;1;1;1	2;2;2;2;2;2;2;1;1;1	2;2;2;2;2;2;2;1;1;1	Protein disulfide-isomerase A3	PDIA3	tr|A0A8I5KW00|A0A8I5KW00_HUMAN Protein disulfide-isomerase OS=Homo sapiens OX=9606 GN=PDIA3 PE=1 SV=1;tr|A0A8I5QKQ5|A0A8I5QKQ5_HUMAN Protein disulfide-isomerase OS=Homo sapiens OX=9606 GN=PDIA3 PE=1 SV=1;tr|A0A8I5KNU9|A0A8I5KNU9_HUMAN protein disulfide-iso	10	2	2	2	1	0	1	0	0	0	0	1	0	1	0	1	0	0	0	0	1	0	1	0	1	0	0	0	0	1	0	5.1	5.1	5.1	50.644	453	453;456;462;477;487;512;505;380;416;437	0.0022321	2.3845	2.6	0	2.6
P46939	P46939	2	2	2	Utrophin	UTRN	sp|P46939|UTRN_HUMAN Utrophin OS=Homo sapiens OX=9606 GN=UTRN PE=1 SV=2	1	2	2	2	1	1	0	0	0	0	0	0	0	1	1	0	0	0	0	0	0	0	1	1	0	0	0	0	0	0	0	0.9	0.9	0.9	394.46	3433	3433	0	2.7442	0.5	0.4	0
A0A087X1B7;X6R700;Q9Y3Y2	A0A087X1B7;X6R700;Q9Y3Y2	1;1;1	1;1;1	1;1;1	Chromatin target of PRMT1 protein	CHTOP	tr|A0A087X1B7|A0A087X1B7_HUMAN Chromatin target of PRMT1 OS=Homo sapiens OX=9606 GN=CHTOP PE=1 SV=1;tr|X6R700|X6R700_HUMAN Chromatin target of PRMT1 OS=Homo sapiens OX=9606 GN=CHTOP PE=1 SV=1;sp|Q9Y3Y2|CHTOP_HUMAN Chromatin target of PRMT1 protein OS=Homo	3	1	1	1	0	0	0	0	0	0	1	1	0	0	0	0	0	0	0	1	1	0	0	0	0	0	0	0	1	1	0	17.1	17.1	17.1	8.5199	76	76;223;248	0	2.4495	0	0	0
D6RBL5;P08758;E9PHT9;D6RBE9	D6RBL5;P08758;E9PHT9;D6RBE9	2;2;1;1	2;2;1;1	2;2;1;1	Annexin;Annexin A5	ANXA5	tr|D6RBL5|D6RBL5_HUMAN Annexin OS=Homo sapiens OX=9606 GN=ANXA5 PE=1 SV=1;sp|P08758|ANXA5_HUMAN Annexin A5 OS=Homo sapiens OX=9606 GN=ANXA5 PE=1 SV=2;tr|E9PHT9|E9PHT9_HUMAN Annexin OS=Homo sapiens OX=9606 GN=ANXA5 PE=1 SV=1;tr|D6RBE9|D6RBE9_HUMAN Annexin O	4	2	2	2	1	0	0	0	1	0	0	0	0	1	0	0	0	1	0	0	0	0	1	0	0	0	1	0	0	0	0	7.3	7.3	7.3	29.337	260	260;320;163;220	0.0077369	1.6161	3.5	0	0
A2ABF4;A0A0G2JJT9;A0A140T954;P26640	A2ABF4;A0A0G2JJT9;A0A140T954;P26640	1;1;1;1	1;1;1;1	1;1;1;1	Valine--tRNA ligase	VARS	tr|A2ABF4|A2ABF4_HUMAN Valine--tRNA ligase (Fragment) OS=Homo sapiens OX=9606 GN=VARS1 PE=1 SV=1;tr|A0A0G2JJT9|A0A0G2JJT9_HUMAN Valine--tRNA ligase (Fragment) OS=Homo sapiens OX=9606 GN=VARS1 PE=1 SV=1;tr|A0A140T954|A0A140T954_HUMAN Valine--tRNA ligase (Fr	4	1	1	1	0	0	0	1	1	0	0	0	1	0	0	0	1	1	0	0	0	1	0	0	0	1	1	0	0	0	1	9.2	9.2	9.2	18.114	174	174;174;366;1264	0.0020202	1.8973	0	0	0
A0A8I5QJM2;H0Y7V8;H0Y5V1;A0A0A0MRJ0;A0A0A0MRJ1;Q5VT25	A0A8I5QJM2;H0Y7V8;H0Y5V1;A0A0A0MRJ0;A0A0A0MRJ1;Q5VT25	1;1;1;1;1;1	1;1;1;1;1;1	1;1;1;1;1;1	Non-specific serine/threonine protein kinase;Serine/threonine-protein kinase MRCK alpha	CDC42BPA	tr|A0A8I5QJM2|A0A8I5QJM2_HUMAN non-specific serine/threonine protein kinase (Fragment) OS=Homo sapiens OX=9606 GN=CDC42BPA PE=1 SV=1;tr|H0Y7V8|H0Y7V8_HUMAN non-specific serine/threonine protein kinase (Fragment) OS=Homo sapiens OX=9606 GN=CDC42BPA PE=1 SV=	6	1	1	1	0	0	0	0	0	0	1	0	0	0	0	0	0	0	0	1	0	0	0	0	0	0	0	0	1	0	0	2.2	2.2	2.2	81.575	728	728;984;1048;1699;1845;1732	0.0077973	1.6704	0	0	0
A0A087WW76;A0A805TBS0;A0A7P0TAS2;Q5T5U3	A0A087WW76;A0A805TBS0;A0A7P0TAS2;Q5T5U3	1;1;1;1	1;1;1;1	1;1;1;1	Rho GTPase-activating protein 21	ARHGAP21	tr|A0A087WW76|A0A087WW76_HUMAN Rho GTPase activating protein 21 OS=Homo sapiens OX=9606 GN=ARHGAP21 PE=1 SV=1;tr|A0A805TBS0|A0A805TBS0_HUMAN Rho GTPase activating protein 21 OS=Homo sapiens OX=9606 GN=ARHGAP21 PE=1 SV=1;tr|A0A7P0TAS2|A0A7P0TAS2_HUMAN Rho G	4	1	1	1	0	0	0	0	0	0	0	0	1	0	0	0	0	0	0	0	0	1	0	0	0	0	0	0	0	0	1	1.3	1.3	1.3	155.98	1406	1406;1948;1965;1958	0.0020661	2.0155	0	0	0
Q71F23	Q71F23	1	1	1	Centromere protein U	CENPU	sp|Q71F23|CENPU_HUMAN Centromere protein U OS=Homo sapiens OX=9606 GN=CENPU PE=1 SV=1	1	1	1	1	0	0	1	0	0	0	0	0	0	0	0	1	0	0	0	0	0	0	0	0	1	0	0	0	0	0	0	2.6	2.6	2.6	47.521	418	418	1	-2	0	0	2.6
Q9P2E7	Q9P2E7	2	2	2	Protocadherin-10	PCDH10	sp|Q9P2E7|PCD10_HUMAN Protocadherin-10 OS=Homo sapiens OX=9606 GN=PCDH10 PE=1 SV=2	1	2	2	2	1	1	0	0	0	0	0	0	1	1	1	0	0	0	0	0	0	1	1	1	0	0	0	0	0	0	1	2.2	2.2	2.2	112.93	1040	1040	0	3.0671	1	1.2	0
A0A0D9SEM9	A0A0D9SEM9	1	1	1		DDX39A	tr|A0A0D9SEM9|A0A0D9SEM9_HUMAN DExD-box helicase 39A (Fragment) OS=Homo sapiens OX=9606 GN=DDX39A PE=1 SV=1	1	1	1	1	0	1	0	0	0	0	0	0	0	0	1	0	0	0	0	0	0	0	0	1	0	0	0	0	0	0	0	10.4	10.4	10.4	10.925	96	96	1	-2	0	10.4	0
A0A087WYS6;O14818;Q8TAA3;H0Y586	A0A087WYS6;O14818;Q8TAA3;H0Y586	2;2;2;1	2;2;2;1	2;2;2;1	Proteasome subunit alpha type-7;Proteasome subunit alpha type-7-like	PSMA8;PSMA7	tr|A0A087WYS6|A0A087WYS6_HUMAN Proteasome (Prosome, macropain) subunit, alpha type, 8, isoform CRA_b OS=Homo sapiens OX=9606 GN=PSMA8 PE=1 SV=1;sp|O14818|PSA7_HUMAN Proteasome subunit alpha type-7 OS=Homo sapiens OX=9606 GN=PSMA7 PE=1 SV=1;sp|Q8TAA3|PSMA8_	4	2	2	2	0	0	0	1	0	0	0	0	1	0	0	0	1	0	0	0	0	1	0	0	0	1	0	0	0	0	1	11.2	11.2	11.2	25.041	224	224;248;256;187	0.0020161	1.8838	0	0	0
Q9P0L0	Q9P0L0	2	1	1	Vesicle-associated membrane protein-associated protein A	VAPA	sp|Q9P0L0|VAPA_HUMAN Vesicle-associated membrane protein-associated protein A OS=Homo sapiens OX=9606 GN=VAPA PE=1 SV=3	1	2	1	1	1	1	2	0	0	0	0	0	0	0	0	1	0	0	0	0	0	0	0	0	1	0	0	0	0	0	0	11.2	6.4	6.4	27.893	249	249	0.0078125	1.6748	4.8	4.8	11.2
O15479	O15479	1	1	1	Melanoma-associated antigen B2	MAGEB2	sp|O15479|MAGB2_HUMAN Melanoma-associated antigen B2 OS=Homo sapiens OX=9606 GN=MAGEB2 PE=1 SV=3	1	1	1	1	0	0	0	0	0	0	0	0	1	0	0	0	0	0	0	0	0	1	0	0	0	0	0	0	0	0	1	5	5	5	35.277	319	319	0.0022075	2.3424	0	0	0
Q9BU76	Q9BU76	1	1	1	Multiple myeloma tumor-associated protein 2	MMTAG2	sp|Q9BU76|MMTA2_HUMAN Multiple myeloma tumor-associated protein 2 OS=Homo sapiens OX=9606 GN=MMTAG2 PE=1 SV=1	1	1	1	1	0	0	0	0	0	0	1	0	0	0	0	0	0	0	0	1	0	0	0	0	0	0	0	0	1	0	0	5.3	5.3	5.3	29.411	263	263	0.0076923	1.5996	0	0	0
Q2VIR3;P41091	Q2VIR3;P41091	1;1	1;1	1;1	Putative eukaryotic translation initiation factor 2 subunit 3-like protein;Eukaryotic translation initiation factor 2 subunit 3	EIF2S3L;EIF2S3	sp|Q2VIR3|IF2GL_HUMAN Eukaryotic translation initiation factor 2 subunit 3B OS=Homo sapiens OX=9606 GN=EIF2S3B PE=2 SV=2;sp|P41091|IF2G_HUMAN Eukaryotic translation initiation factor 2 subunit 3 OS=Homo sapiens OX=9606 GN=EIF2S3 PE=1 SV=3	2	1	1	1	0	0	0	0	0	0	1	0	0	0	0	0	0	0	0	1	0	0	0	0	0	0	0	0	1	0	0	3.4	3.4	3.4	51.228	472	472;472	0	2.4626	0	0	0
A0A7P0T8C6;Q7Z2W4	A0A7P0T8C6;Q7Z2W4	1;1	1;1	1;1	Zinc finger CCCH-type antiviral protein 1	ZC3HAV1	tr|A0A7P0T8C6|A0A7P0T8C6_HUMAN Zinc finger CCCH-type containing, antiviral 1 OS=Homo sapiens OX=9606 GN=ZC3HAV1 PE=1 SV=1;sp|Q7Z2W4|ZCCHV_HUMAN Zinc finger CCCH-type antiviral protein 1 OS=Homo sapiens OX=9606 GN=ZC3HAV1 PE=1 SV=3	2	1	1	1	0	0	0	0	0	0	1	0	0	0	0	0	0	0	0	1	0	0	0	0	0	0	0	0	1	0	0	2.4	2.4	2.4	85.195	757	757;902	0.0021231	2.1946	0	0	0
H3BLW5;P32004	H3BLW5;P32004	1;1	1;1	1;1	Neural cell adhesion molecule L1	L1CAM	tr|H3BLW5|H3BLW5_HUMAN L1 cell adhesion molecule (Fragment) OS=Homo sapiens OX=9606 GN=L1CAM PE=1 SV=1;sp|P32004|L1CAM_HUMAN Neural cell adhesion molecule L1 OS=Homo sapiens OX=9606 GN=L1CAM PE=1 SV=2	2	1	1	1	0	0	0	0	0	1	0	0	0	0	0	0	0	0	1	0	0	0	0	0	0	0	0	1	0	0	0	7.2	7.2	7.2	16.722	153	153;1257	1	-2	0	0	0
A0A3B3ISH2;A0A0A0MQY7;Q5VU97	A0A3B3ISH2;A0A0A0MQY7;Q5VU97	1;1;1	1;1;1	1;1;1	VWFA and cache domain-containing protein 1	CACHD1	tr|A0A3B3ISH2|A0A3B3ISH2_HUMAN Cache domain containing 1 OS=Homo sapiens OX=9606 GN=CACHD1 PE=1 SV=1;tr|A0A0A0MQY7|A0A0A0MQY7_HUMAN Cache domain containing 1 OS=Homo sapiens OX=9606 GN=CACHD1 PE=1 SV=1;sp|Q5VU97|CAHD1_HUMAN VWFA and cache domain-containing	3	1	1	1	0	0	0	0	0	0	0	1	0	0	0	0	0	0	0	0	1	0	0	0	0	0	0	0	0	1	0	0.8	0.8	0.8	127.25	1140	1140;1223;1274	1	-2	0	0	0
I3L0J9;I3L3Z8;A0A994J6E8;A0A994J491;Q6P2Q9	I3L0J9;I3L3Z8;A0A994J6E8;A0A994J491;Q6P2Q9	1;1;1;1;1	1;1;1;1;1	1;1;1;1;1	Pre-mRNA-processing-splicing factor 8	PRPF8	tr|I3L0J9|I3L0J9_HUMAN Pre-mRNA processing factor 8 (Fragment) OS=Homo sapiens OX=9606 GN=PRPF8 PE=1 SV=8;tr|I3L3Z8|I3L3Z8_HUMAN Pre-mRNA processing factor 8 OS=Homo sapiens OX=9606 GN=PRPF8 PE=1 SV=2;tr|A0A994J6E8|A0A994J6E8_HUMAN Pre-mRNA processing fact	5	1	1	1	1	0	0	0	0	0	0	0	0	1	0	0	0	0	0	0	0	0	1	0	0	0	0	0	0	0	0	1.7	1.7	1.7	119.7	1012	1012;2275;2286;2290;2335	1	-2	1.7	0	0
E9PN81;Q8TDP1	E9PN81;Q8TDP1	1;1	1;1	1;1	Ribonuclease H2 subunit C	RNASEH2C	tr|E9PN81|E9PN81_HUMAN Ribonuclease H2 subunit C OS=Homo sapiens OX=9606 GN=RNASEH2C PE=1 SV=1;sp|Q8TDP1|RNH2C_HUMAN Ribonuclease H2 subunit C OS=Homo sapiens OX=9606 GN=RNASEH2C PE=1 SV=1	2	1	1	1	1	0	1	0	1	0	1	0	0	1	0	1	0	1	0	1	0	0	1	0	1	0	1	0	1	0	0	5.3	5.3	5.3	26.302	247	247;164	0.0021186	2.1907	5.3	0	5.3
H7C2G2;Q93070	H7C2G2;Q93070	1;1	1;1	1;1	NAD(P)(+)--arginine ADP-ribosyltransferase;Ecto-ADP-ribosyltransferase 4	ART4	tr|H7C2G2|H7C2G2_HUMAN NAD(P)(+)--arginine ADP-ribosyltransferase (Fragment) OS=Homo sapiens OX=9606 GN=ART4 PE=1 SV=1;sp|Q93070|NAR4_HUMAN Ecto-ADP-ribosyltransferase 4 OS=Homo sapiens OX=9606 GN=ART4 PE=2 SV=2	2	1	1	1	0	0	0	0	0	0	0	0	1	0	0	0	0	0	0	0	0	1	0	0	0	0	0	0	0	0	1	2.6	2.6	2.6	31.511	273	273;314	1	-2	0	0	0
K7EQ17;O94818	K7EQ17;O94818	1;1	1;1	1;1	Nucleolar protein 4	NOL4	tr|K7EQ17|K7EQ17_HUMAN Nucleolar protein 4 (Fragment) OS=Homo sapiens OX=9606 GN=NOL4 PE=1 SV=1;sp|O94818|NOL4_HUMAN Nucleolar protein 4 OS=Homo sapiens OX=9606 GN=NOL4 PE=1 SV=2	2	1	1	1	0	0	0	1	0	1	0	0	0	0	0	0	1	0	1	0	0	0	0	0	0	1	0	1	0	0	0	2.2	2.2	2.2	61.343	558	558;638	0.0095057	1.5525	0	0	0
P03928	P03928	1	1	1	ATP synthase protein 8	MT-ATP8	sp|P03928|ATP8_HUMAN ATP synthase protein 8 OS=Homo sapiens OX=9606 GN=MT-ATP8 PE=1 SV=1	1	1	1	1	0	0	0	0	0	0	1	1	0	0	0	0	0	0	0	1	1	0	0	0	0	0	0	0	1	1	0	13.2	13.2	13.2	7.9916	68	68	1	-2	0	0	0
P26374	P26374	1	1	1	Rab proteins geranylgeranyltransferase component A 2	CHML	sp|P26374|RAE2_HUMAN Rab proteins geranylgeranyltransferase component A 2 OS=Homo sapiens OX=9606 GN=CHML PE=1 SV=2	1	1	1	1	1	0	0	0	0	0	0	0	0	1	0	0	0	0	0	0	0	0	1	0	0	0	0	0	0	0	0	1.8	1.8	1.8	74.071	656	656	1	-2	1.8	0	0
P54107	P54107	1	1	1	Cysteine-rich secretory protein 1	CRISP1	sp|P54107|CRIS1_HUMAN Cysteine-rich secretory protein 1 OS=Homo sapiens OX=9606 GN=CRISP1 PE=1 SV=1	1	1	1	1	1	0	1	1	0	1	0	0	0	1	0	1	1	0	1	0	0	0	1	0	1	1	0	1	0	0	0	4.8	4.8	4.8	28.481	249	249	0	39.326	4.8	0	4.8
[truncated: 57 more columns]

## Sheet: Ring
Protein names	Gene names	iBAQ	iBAQ blank_rep1	iBAQ blank_rep2	iBAQ blank_rep3	iBAQ RING_rep1	iBAQ RING_rep2	iBAQ RING_rep3	blank	ring	ring/blank
Zinc finger CCCH-type antiviral protein 1	ZC3HAV1	38402	0	0	0	38402	0	0	0	12800.7	#DIV/0!
Rho GTPase-activating protein 21	ARHGAP21	50335	0	0	0	0	0	50335	0	16778.3	#DIV/0!
Catalase	CAT	391670	0	0	0	85947	0	0	0	28649	#DIV/0!
Centromere-associated protein E	CENPE	88535	0	0	0	0	88535	0	0	29511.7	#DIV/0!
Putative eukaryotic translation initiation factor 2 subunit 3-like protein;Eukaryotic translation initiation factor 2 subunit 3	EIF2S3L;EIF2S3	91878	0	0	0	91878	0	0	0	30626	#DIV/0!
Regulator of nonsense transcripts 1	UPF1	121260	0	0	0	57131	42005	0	0	33045.3	#DIV/0!
Non-specific serine/threonine protein kinase;Serine/threonine-protein kinase MRCK alpha	CDC42BPA	110810	0	0	0	110810	0	0	0	36936.7	#DIV/0!
Heat shock-related 70 kDa protein 2	HSPA2	620390	0	0	0	0	0	127400	0	42466.7	#DIV/0!
Multiple myeloma tumor-associated protein 2	MMTAG2	153950	0	0	0	153950	0	0	0	51316.7	#DIV/0!
Far upstream element-binding protein 3	FUBP3	662340	0	0	0	84052	73495	0	0	52515.7	#DIV/0!
Proteasome subunit alpha type-7;Proteasome subunit alpha type-7-like	PSMA8;PSMA7	302710	0	0	0	0	0	181810	0	60603.3	#DIV/0!
La-related protein 1	LARP1	247470	0	0	0	0	129430	58342	0	62590.7	#DIV/0!
Valine--tRNA ligase	VARS	598270	0	0	0	0	0	239970	0	79990	#DIV/0!
Melanoma-associated antigen B2	MAGEB2	267240	0	0	0	0	0	267240	0	89080	#DIV/0!
Putative helicase MOV-10	MOV10	305470	0	0	0	77111	196270	0	0	91127	#DIV/0!
Actin-binding LIM protein 1	ABLIM1	274020	0	0	0	95457	97590	80976	0	91341	#DIV/0!
Sodium/potassium-transporting ATPase subunit alpha-1	ATP1A1	448730	0	0	0	113160	183070	0	0	98743.3	#DIV/0!
Heterogeneous nuclear ribonucleoprotein U-like protein 1	HNRNPUL1	340990	0	0	0	226420	114560	0	0	113660	#DIV/0!
DnaJ homolog subfamily A member 1	DNAJA1	489870	0	0	0	350570	0	0	0	116857	#DIV/0!
Plasma protease C1 inhibitor	SERPING1	696280	0	0	0	0	0	412290	0	137430	#DIV/0!
Pyruvate kinase;Pyruvate kinase PKM	PKM	964990	0	0	0	0	195720	313430	0	169717	#DIV/0!
Beta-actin-like protein 2	ACTBL2	399290000	0	0	0	0	750860	0	0	250287	#DIV/0!
Thioredoxin	TXN	3078300	0	0	0	0	0	850090	0	283363	#DIV/0!
60S ribosomal protein L38	RPL38	9665100	0	0	0	906120	0	0	0	302040	#DIV/0!
Chromatin target of PRMT1 protein	CHTOP	916160	0	0	0	916160	0	0	0	305387	#DIV/0!
Splicing factor 1	SF1	1029600	0	0	0	470660	277110	281840	0	343203	#DIV/0!
Basic salivary proline-rich protein 1;Proline-rich peptide II-2;Basic peptide IB-6;Peptide P-H;Basic salivary proline-rich protein 2;Basic proline-rich peptide IB-1;Basic proline-rich peptide P-E;Basic proline-rich peptide IB-7;Basic proline-rich peptide IB-8c;Basic proline-rich peptide IB-4	PRB1;PRB2	1114700	0	0	0	491560	303480	319690	0	371577	#DIV/0!
Heterogeneous nuclear ribonucleoprotein F;Heterogeneous nuclear ribonucleoprotein F, N-terminally processed	HNRNPF	1135000	0	0	0	182810	459620	492580	0	378337	#DIV/0!
C-X-C motif chemokine 5;ENA-78(8-78);ENA-78(9-78)	CXCL5	1466000	0	0	0	0	1466000	0	0	488667	#DIV/0!
TAR DNA-binding protein 43	TARDBP;TDP43	2376500	0	0	0	753010	0	985320	0	579443	#DIV/0!
Antileukoproteinase	SLPI	4449000	0	0	0	596790	616820	702280	0	638630	#DIV/0!
Enhancer of rudimentary homolog	ERH	2690200	0	0	0	604850	704680	824880	0	711470	#DIV/0!
Zymogen granule protein 16 homolog B	ZG16B	2284900	0	0	0	761620	859370	663870	0	761620	#DIV/0!
Heterogeneous nuclear ribonucleoprotein H2	HNRNPH2	2360900	0	0	0	948670	611740	800460	0	786957	#DIV/0!
40S ribosomal protein S15a	RPS15A	2452700	0	0	0	0	1861000	591780	0	817593	#DIV/0!
Protein transport protein Sec61 subunit beta	SEC61B	3673500	0	0	0	1010900	0	1618100	0	876333	#DIV/0!
	PRB1	4412600	0	0	0	412440	2991900	1008300	0	1470880	#DIV/0!
Guanine nucleotide-binding protein G(I)/G(S)/G(O) subunit gamma-5	GNG5	4848800	0	0	0	906790	2899900	1042000	0	1616230	#DIV/0!
Basic salivary proline-rich protein 4;Protein N1;Glycosylated protein A;Peptide P-D	PRB4	9809800	0	0	0	3081100	3756000	2972700	0	3.26993e+06	#DIV/0!
Guanine nucleotide-binding protein G(I)/G(S)/G(O) subunit gamma-12	GNG12	15187000	0	0	0	4261400	6882600	4043100	0	5.06237e+06	#DIV/0!
40S ribosomal protein S27;40S ribosomal protein S27-like	RPS27;RPS27L	47680000	0	0	0	7005900	8564900	4713500	0	6.76143e+06	#DIV/0!
	USP32	82044000	0	0	0	14674000	12181000	11765000	0	1.28733e+07	#DIV/0!
RNA-binding protein MEX3D	MEX3D	1595400000	0	0	0	248150000	238850000	216510000	0	2.34503e+08	#DIV/0!
Polyadenylate-binding protein;Polyadenylate-binding protein 4	PABPC4	4466400	123640	0	0	604410	1058700	848800	41213.3	837303	20.3163
Insulin-like growth factor 2 mRNA-binding protein 1	IGF2BP1	12051000	340740	138680	450110	2989000	3194300	3018500	309843	3.06727e+06	9.89941
Polyadenylate-binding protein 1;Polyadenylate-binding protein	PABPC1	36740000	1046900	745040	591870	6396100	5700200	5906500	794603	6.00093e+06	7.55211
Lysozyme C;Lysozyme	LYZ	56699000	2951700	0	2443400	11713000	12444000	12685000	1.79837e+06	1.22807e+07	6.82879
Protein kinase C and casein kinase substrate in neurons protein 3	PACSIN3	2055700	0	268290	0	680750	451110	655560	89430	595807	6.66227
Alpha-enolase;Enolase	ENO1	4392600	487850	0	0	683290	1483900	1027000	162617	1064730	6.54748
Monocarboxylate transporter 1	SLC16A1	4948200	0	0	415980	1433400	0	992200	138660	808533	5.83105
Plasminogen activator inhibitor 1 RNA-binding protein	SERBP1	1893000	0	144900	143210	538150	540690	526090	96036.7	534977	5.57055
Nestin	NES	293010	0	45374	0	92558	39515	115560	15124.7	82544.3	5.4576
Heterogeneous nuclear ribonucleoprotein H;Heterogeneous nuclear ribonucleoprotein H, N-terminally processed	HNRNPH1	55585000	2267800	3287000	3998200	12360000	12813000	13554000	3.18433e+06	12909000	4.05391
Leucine-rich PPR motif-containing protein, mitochondrial	LRPPRC	258660	0	0	48730	59806	79719	51828	16243.3	63784.3	3.9268
Ras GTPase-activating protein-binding protein 2;Ras GTPase-activating protein-binding protein 1	G3BP2;G3BP1	1174200	156160	100620	0	325960	163720	427740	85593.3	305807	3.57279
Alpha-2-antiplasmin	SERPINF2	7210600	476690	0	564740	686550	1679700	1351000	347143	1.23908e+06	3.56937
Nucleophosmin	NPM1	59063000	1182000	1196500	10777000	15378000	14106000	15787000	4.38517e+06	1.50903e+07	3.44122
Heterogeneous nuclear ribonucleoprotein A/B	HNRNPAB	9287800	300500	263600	1041200	1561500	1775600	2022100	535100	1786400	3.33844
Acid ceramidase;Acid ceramidase subunit alpha;Acid ceramidase subunit beta	ASAH1	6871600	703340	0	743270	375380	2103200	2204200	482203	1.56093e+06	3.23707
Stress-70 protein, mitochondrial	HSPA9	4888700	274540	497440	294270	602880	1255100	1581500	355417	1.14649e+06	3.22577
Fructose-bisphosphate aldolase;Fructose-bisphosphate aldolase A	ALDOA	5448500	407960	0	258700	436760	815410	816120	222220	689430	3.10247
60S ribosomal protein L22	RPL22	6648400	1647700	0	0	950420	4050300	0	549233	1.66691e+06	3.03497
RuvB-like 1	RUVBL1	841820	135340	82421	0	170130	125880	328050	72587	208020	2.8658
Annexin;Annexin A1	ANXA1	3952200	283020	236190	321950	830560	710340	852540	280387	797813	2.8454
Heterogeneous nuclear ribonucleoprotein L	HNRNPL	1393900	0	0	269110	0	511530	226580	89703.3	246037	2.74278
Nucleolin	NCL	6793600	372600	1100100	183910	878500	1718000	1794200	552203	1.46357e+06	2.65041
Endoplasmin	HSP90B1	2129100	404460	145160	0	314520	599690	481730	183207	465313	2.53983
Heterogeneous nuclear ribonucleoprotein H3	HNRNPH3	11666000	1162800	801620	723410	1945400	2672900	1855100	895943	2157800	2.40841
Mitochondrial 2-oxoglutarate/malate carrier protein	SLC25A11	1863200	0	183520	165120	175840	396260	239560	116213	270553	2.32807
Zinc transporter SLC39A7	SLC39A7	29114000	2165900	2000400	3049200	4938700	7343400	4253000	2.40517e+06	5511700	2.29161
Prohibitin-2	PHB2	1439200	139400	0	0	157340	0	158270	46466.7	105203	2.26406
60S ribosomal protein L23	RPL23	21682000	2307200	405730	3057700	2539800	4822100	5341600	1.92354e+06	4234500	2.20141
Eukaryotic initiation factor 4A-III;Eukaryotic initiation factor 4A-III, N-terminally processed	EIF4A3	975390	0	0	305240	136870	233340	299940	101747	223383	2.19549
Protein-glutamine gamma-glutamyltransferase E;Protein-glutamine gamma-glutamyltransferase E 50 kDa catalytic chain;Protein-glutamine gamma-glutamyltransferase E 27 kDa non-catalytic chain	TGM3	789590	64822	62355	0	277800	0	0	42392.3	92600	2.18436
40S ribosomal protein S2	RPS2	11679000	527760	1136600	1448100	463800	2740600	3531500	1.03749e+06	2245300	2.16417
Cathepsin D;Cathepsin D light chain;Cathepsin D heavy chain	CTSD	3912000	146680	490020	232620	710620	907750	221710	289773	613360	2.11669
Disks large homolog 1	DLG1	320100	0	0	103070	78467	138570	0	34356.7	72345.7	2.10572
Heterogeneous nuclear ribonucleoprotein D0	HNRNPD	39723000	2330700	2693400	4062200	5170200	5475800	8194900	3.02877e+06	6280300	2.07355
40S ribosomal protein S14	RPS14	72346000	4078800	7208700	7809200	10664000	15504000	12573000	6.36557e+06	1.29137e+07	2.02868

## Sheet: Mex3d
Protein names	Gene names	iBAQ	iBAQ blank_rep1	iBAQ blank_rep2	iBAQ blank_rep3	iBAQ MEX_rep1	iBAQ MEX_rep2	iBAQ MEX_rep3	blank	mex3d	MEX3D/Blank
Regulator of nonsense transcripts 1	UPF1	121260	0	0	0	22125	0	0	0	7375	#DIV/0!
Putative helicase MOV-10	MOV10	305470	0	0	0	32087	0	0	0	10695.7	#DIV/0!
La-related protein 1	LARP1	247470	0	0	0	0	59699	0	0	19899.7	#DIV/0!
Proteasome subunit alpha type-7;Proteasome subunit alpha type-7-like	PSMA8;PSMA7	302710	0	0	0	120900	0	0	0	40300	#DIV/0!
DnaJ homolog subfamily A member 1	DNAJA1	489870	0	0	0	0	139300	0	0	46433.3	#DIV/0!
Sodium/potassium-transporting ATPase subunit alpha-1	ATP1A1	448730	0	0	0	0	96236	56264	0	50833.3	#DIV/0!
RasGAP-activating-like protein 1	RASAL1	258710	0	0	0	0	0	258710	0	86236.7	#DIV/0!
Plasma protease C1 inhibitor	SERPING1	696280	0	0	0	0	145980	138000	0	94660	#DIV/0!
Catalase	CAT	391670	0	0	0	127100	0	178630	0	101910	#DIV/0!
Valine--tRNA ligase	VARS	598270	0	0	0	141140	217160	0	0	119433	#DIV/0!
Neural cell adhesion molecule L1	L1CAM	359050	0	0	0	0	0	359050	0	119683	#DIV/0!
Pyruvate kinase;Pyruvate kinase PKM	PKM	964990	0	0	0	0	122400	333440	0	151947	#DIV/0!
	KRT19	491450	0	0	0	0	0	491450	0	163817	#DIV/0!
Heat shock-related 70 kDa protein 2	HSPA2	620390	0	0	0	369860	0	123120	0	164327	#DIV/0!
Far upstream element-binding protein 3	FUBP3	662340	0	0	0	193400	132190	179200	0	168263	#DIV/0!
Enhancer of rudimentary homolog	ERH	2690200	0	0	0	555750	0	0	0	185250	#DIV/0!
TAR DNA-binding protein 43	TARDBP;TDP43	2376500	0	0	0	175370	0	462790	0	212720	#DIV/0!
	ANKLE2	1015500	0	0	0	475690	539780	0	0	338490	#DIV/0!
Protein transport protein Sec61 subunit beta	SEC61B	3673500	0	0	0	1044500	0	0	0	348167	#DIV/0!
	IGHV3OR16-9	1343700	0	0	0	616020	727650	0	0	447890	#DIV/0!
Thioredoxin	TXN	3078300	0	0	0	1218800	1009300	0	0	742700	#DIV/0!
Antileukoproteinase	SLPI	4449000	0	0	0	851590	913340	768200	0	844377	#DIV/0!
60S ribosomal protein L38	RPL38	9665100	0	0	0	2685700	3473500	2599800	0	2.91967e+06	#DIV/0!
40S ribosomal protein S27;40S ribosomal protein S27-like	RPS27;RPS27L	47680000	0	0	0	3683000	18131000	5581700	0	9131900	#DIV/0!
	USP32	82044000	0	0	0	15779000	18200000	9443500	0	1.44742e+07	#DIV/0!
Beta-actin-like protein 2	ACTBL2	399290000	0	0	0	0	0	398540000	0	1.32847e+08	#DIV/0!
RNA-binding protein MEX3D	MEX3D	1595400000	0	0	0	266100000	324660000	301120000	0	2.97293e+08	#DIV/0!
ATPase family AAA domain-containing protein 3B	ATAD3B	12257000	225510	0	0	11912000	0	0	75170	3.97067e+06	52.8225
Polyadenylate-binding protein;Polyadenylate-binding protein 4	PABPC4	4466400	123640	0	0	617110	528320	685490	41213.3	610307	14.8085
Prohibitin-2	PHB2	1439200	139400	0	0	382470	411470	190200	46466.7	328047	7.05983
Polyadenylate-binding protein 1;Polyadenylate-binding protein	PABPC1	36740000	1046900	745040	591870	5314800	5918400	5120100	794603	5451100	6.86015
Protein-glutamine gamma-glutamyltransferase K	TGM1	361480	51756	0	0	137190	143030	0	17252	93406.7	5.41425
Monocarboxylate transporter 1	SLC16A1	4948200	0	0	415980	1101400	1005200	0	138660	702200	5.06419
Suprabasin	SBSN	2242100	90556	178340	121170	650800	775180	426070	130022	617350	4.74804
Fructose-bisphosphate aldolase;Fructose-bisphosphate aldolase A	ALDOA	5448500	407960	0	258700	289250	1069600	1354700	222220	904517	4.07037
F-box only protein 50	NCCRP1	1505000	109430	0	195890	337260	398590	463790	101773	399880	3.92912
Malate dehydrogenase, cytoplasmic;Malate dehydrogenase	MDH1	2395700	376360	0	0	0	678790	797310	125453	492033	3.92204
Glycodelin	PAEP	4871600	940010	0	0	1052600	1002800	1041900	313337	1.03243e+06	3.29496
Trypsin-3	PRSS3	14160000	0	0	2402600	1793600	2720300	2805400	800867	2.43977e+06	3.04641
Protein-glutamine gamma-glutamyltransferase E;Protein-glutamine gamma-glutamyltransferase E 50 kDa catalytic chain;Protein-glutamine gamma-glutamyltransferase E 27 kDa non-catalytic chain	TGM3	789590	64822	62355	0	0	230110	154510	42392.3	128207	3.02429
	C11orf85	50454000	0	5626200	8064700	10493000	15856000	10414000	4.56363e+06	1.22543e+07	2.68521
Lysozyme C;Lysozyme	LYZ	56699000	2951700	0	2443400	4410200	5564200	4487200	1.79837e+06	4.82053e+06	2.68051
Prohibitin	PHB	1716500	0	0	410660	348740	512770	187730	136887	349747	2.55501
Alpha-2-antiplasmin	SERPINF2	7210600	476690	0	564740	674590	1261000	516320	347143	817303	2.35437
ELAV-like protein 1	ELAVL1	15801000	1094600	947860	1069100	1745300	3573400	1658900	1.03719e+06	2.32587e+06	2.24248
Insulin-like growth factor 2 mRNA-binding protein 1	IGF2BP1	12051000	340740	138680	450110	908370	1011100	0	309843	639823	2.06499
Mitochondrial 2-oxoglutarate/malate carrier protein	SLC25A11	1863200	0	183520	165120	200710	244700	257510	116213	234307	2.01618
